# Supplementary material for: Investigating the Human Intestinal DNA Virome and Predicting Disease-Associated Virus–Host Interactions in Severe Myalgic Encephalomyelitis/Chronic Fatigue Syndrome (ME/CFS)
Source: MDPI journal article supplement (doi:10.3390/ijms242417267), 2023-12-08
Supplement: s1 [file s1]

Table S2-1. VIP\_vOTUs\_checkv

| contig_id                 | contig_length | provirus | proviral_length | viral_genes | host_genes     | checkv_quality   | missing_quality | completeness | contamination |
|---------------------------|---------------|----------|-----------------|-------------|----------------|------------------|-----------------|--------------|---------------|
| S17_extracted_k141_29558  | 1174          | No       | NA              | 0           | 1              | Not-determined   | Genome-fragment | NA           | 0             |
| S9_extracted_k141_55517   | 1000          | No       | NA              | 2           | 0              | Low-quality      | Genome-fragment | 1.09         | 0             |
| S17_extracted_k141_73905  | 4103          | No       | NA              | 0           | 2              | Not-determined   | Genome-fragment | NA           | 0             |
| S17_extracted_k141_44341  | 7317          | No       | NA              | 0           | 5              | Not-determined   | Genome-fragment | NA           | 0             |
| S17_extracted_k141_125625 | 3571          | No       | NA              | 0           | 0              | Not-determined   | Genome-fragment | NA           | 0             |
| S17_extracted_k141_140412 | 1061          | No       | NA              | 0           | 0              | Not-determined   | Genome-fragment | NA           | 0             |
| S17_extracted_k141_88694  | 1059          | No       | NA              | 0           | 2              | Not-determined   | Genome-fragment | NA           | 0             |
| S17_extracted_k141_66541  | 1536          | No       | NA              | 0           | 1              | Not-determined   | Genome-fragment | NA           | 0             |
| S14_extracted_k141_60624  | 1000          | No       | NA              | 0           | 1              | Low-quality      | Genome-fragment | 2.56         | 0             |
| S17_extracted_k141_14804  | 1049          | No       | NA              | 0           | 0              | Not-determined   | Genome-fragment | NA           | 0             |
| S14_extracted_k141_11153  | 1000          | No       | NA              | 0           | 1              | Low-quality      | Genome-fragment | 0.76         | 0             |
| S17_extracted_k141_66548  | 1930          | No       | NA              | 0           | 1              | Not-determined   | Genome-fragment | NA           | 0             |
| S1_vv_k141_123264  full   | 1000          | No       | NA              | 3           | 0              | Low-quality      | Genome-fragment | 1.61         | 0             |
| S17_extracted_65700       | 1000          | No       | NA              | 1           | 0              | Low-quality      | Genome-fragment | 2.56         | 0             |
| S17_extracted_k141_14823  | 1010          | No       | NA              | 0           | 0              | Not-determined   | Genome-fragment | NA           | 0             |
| S17_extracted_k141_36993  | 1031          | No       | NA              | 0           | 1              | Not-determined   | Genome-fragment | NA           | 0             |
| S7_vv_25620  full         | 1000          | No       | NA              | 2           | 0              | Low-quality      | Genome-fragment | 1.99         | 0             |
| S17_extracted_k141_169985 | 2542          | No       | NA              | 0           | 0              | Not-determined   | Genome-fragment | NA           | 0             |
| S17_extracted_k141_51785  | 6067          | No       | NA              | 0           | 2              | Not-determined   | Genome-fragment | NA           | 0             |
| S17_extracted_k141_96125  | 1301          | No       | NA              | 0           | 1              | Not-determined   | Genome-fragment | NA           | 0             |
| S7_vv_48054  full         | 1000          | No       | NA              | 0           | 1              | Low-quality      | Genome-fragment | 0.65         | 0             |
| S17_extracted_k141_96132  | 1343          | No       | NA              | 0           | 3              | Not-determined   | Genome-fragment | NA           | 0             |
| S7_vv_16714  H2gene       | 1000          | No       | NA              | 0           | 1              | Low-quality      | Genome-fragment | 1.12         | 0             |
| S10_extracted_25739       | 1000          | No       | NA              | 0           | 2              | Low-quality      | Genome-fragment | 1.08         | 0             |
| S17_extracted_k141_118309 | 1474          | No       | NA              | 0           | 1              | Not-determined   | Genome-fragment | NA           | 0             |
| S17_extracted_k141_96141  | 1262          | No       | NA              | 0           | 0              | Not-determined   | Genome-fragment | NA           | 0             |
| S17_extracted_k141_66582  | 4129          | No       | NA              | 0           | 0              | Not-determined   | Genome-fragment | NA           | 0             |
| S17_extracted_k141_29669  | 3665          | No       | NA              | 0           | 2              | Not-determined   | Genome-fragment | NA           | 0             |
| S17_extracted_k141_29672  | 1006          | No       | NA              | 0           | 1              | Not-determined   | Genome-fragment | NA           | 0             |
| S17_extracted_k141_104    | 4839          | No       | NA              | 0           | 1              | Not-determined   | Genome-fragment | NA           | 0             |
| S17_extracted_k141_133078 | 1049          | No       | NA              | 0           | 1              | Not-determined   | Genome-fragment | NA           | 0             |
| S17_extracted_k141_107    | 7447          | No       | NA              | 0           | 5              | Not-determined   | Genome-fragment | NA           | 0             |
| S17_extracted_k141_162641 | 1112          | No       | NA              | 0           | 0              | Not-determined   | Genome-fragment | NA           | 0             |
| S17_extracted_k141_96154  | 1386          | No       | NA              | 0           | 1              | Not-determined   | Genome-fragment | NA           | 0             |
| S8_extracted_k141_192562  | 1000          | No       | NA              | 0           | 0              | Low-quality      | Genome-fragment | 1.52         | 0             |
| S17_extracted_k141_29703  | 2194          | No       | NA              | 0           | 1              | Not-determined   | Genome-fragment | NA           | 0             |
| S17_extracted_k141_140474 | 3147          | No       | NA              | 0           | 1              | Not-determined   | Genome-fragment | NA           | 0             |
| S17_extracted_k141_29713  | 1436          | No       | NA              | 0           | 1              | Not-determined   | Genome-fragment | NA           | 0             |
| S17_extracted_k141_66627  | 1313          | No       | NA              | 0           | 0              | Not-determined   | Genome-fragment | NA           | 0             |
| S17_extracted_k141_74031  | 2593          | No       | NA              | 0           | 1              | Not-determined   | Genome-fragment | NA           | 0             |
| S17_extracted_k141_162664 | 2006          | No       | NA              | 0           | 2              | Not-determined   | Genome-fragment | NA           | 0             |
| S17_extracted_k141_44417  | 1820          | No       | NA              | 0           | 1              | Not-determined   | Genome-fragment | NA           | 0             |
| S17_extracted_k141_22322  | 2815          | No       | NA              | 0           | 1              | Not-determined   | Genome-fragment | NA           | 0             |
| S17_extracted_k141_125697 | 1388          | No       | NA              | 0           | 1              | Not-determined   | Genome-fragment | NA           | 0             |
| S17_extracted_k141_74065  | 1224          | No       | NA              | 0           | 0              | Not-determined   | Genome-fragment | NA           | 0             |
| S17_extracted_k141_74068  | 1372          | No       | NA              | 0           | 0              | Not-determined   | Genome-fragment | NA           | 0             |
| S17_extracted_k141_103593 | 1264          | No       | NA              | 0           | 1              | Not-determined   | Genome-fragment | NA           | 0             |
| S8_extracted_k141_88686   | 1000          | No       | NA              | 0           | 0              | Low-quality      | Genome-fragment | 1.9          | 0             |
| S17_extracted_k141_103596 | 1042          | No       | NA              | 0           | 1              | Not-determined   | Genome-fragment | NA           | 0             |
| S17_extracted_k141_27084  | 1005          | No       | NA              | 0           | 1              | Not-determined   | Genome-fragment | NA           | 0             |
| S8_vv_k141_143174  full   | 1000          | No       | NA              | 0           | 0              | Low-quality      | Genome-fragment | 0.39         | 0             |
| S17_extracted_k141_88810  | 2336          | No       | NA              | 0           | 0              | Not-determined   | Genome-fragment | NA           | 0             |
| S17_extracted_k141_25378  | 1001          | No       | NA              | 1           | 0              | Low-quality      | Genome-fragment | 2.24         | 0             |
| S17_extracted_k141_118382 | 1010          | No       | NA              | 0           | 0              | Not-determined   | Genome-fragment | NA           | 0             |
| S17_extracted_k141_103645 | 1363          | No       | NA              | 0           | 0              | Not-determined   | Genome-fragment | NA           | 0             |
| S17_vv_k141_120886  full  | 1001          | No       | NA              | 0           | 0              | Low-quality      | Genome-fragment | 1.55         | 0             |
| S17_extracted_k141_155306 | 1073          | No       | NA              | 0           | 0              | Not-determined   | Genome-fragment | NA           | 0             |
| S17_vv_k141_94174  full   | 1001          | No       | NA              | 0           | 1              | Low-quality      | Genome-fragment | 2.32         | 0             |
| S17_extracted_k141_147961 | 4804          | No       | NA              | 0           | 4              | Not-determined   | Genome-fragment | NA           | 0             |
| S17_extracted_k141_15926  | 1543          | No       | NA              | 0           | 0              | Not-determined   | Genome-fragment | NA           | 0             |
| S17_extracted_k141_22300  | 1330          | No       | NA              | 0           | 0              | Not-determined   | Genome-fragment | NA           | 0             |
| S17_extracted_k141_37184  | 1522          | No       | NA              | 0           | 1              | Not-determined   | Genome-fragment | NA           | 0             |
| S17_vv_k141_84320  H2gene | 1001          | No       | NA              | 2           | 0              | Low-quality      | Genome-fragment | 1.79         | 0             |
| S17_extracted_k141_1647   | 1103          | No       | NA              | 0           | 0              | Not-determined   | Genome-fragment | NA           | 0             |
| S17_extracted_k141_37193  | 1111          | No       | NA              | 0           | 0              | Not-determined   | Genome-fragment | NA           | 0             |
| S17_extracted_k141_103677 | 2068          | No       | NA              | 0           | 0              | Not-determined   | Genome-fragment | NA           | 0             |
| S17_extracted_k141_81130  | 4014          | No       | NA              | 0           | 0              | Not-determined   | Genome-fragment | NA           | 0             |
| S17_extracted_k141_140605 | 1322          | No       | NA              | 0           | 2              | Not-determined   | Genome-fragment | NA           | 0             |
| S17_vv_k141_4543  H2gene  | 1001          | No       | NA              | 1           | 0              | Low-quality      | Genome-fragment | 1.6          | 0             |
| S17_extracted_k141_1184   | 1717          | No       | NA              | 0           | 4              | Not-determined   | Genome-fragment | NA           | 0             |
| S17_vv_k141_63804  H2gene | 1001          | No       | NA              | 2           | 0              | Low-quality      | Genome-fragment | 2.46         | 0             |
| S17_extracted_k141_96379  | 1323          | No       | NA              | 0           | 1              | Not-determined   | Genome-fragment | NA           | 0             |
| S9_vv_k141_16791  full    | 1001          | No       | NA              | 1           | 0              | Low-quality      | Genome-fragment | 2.2          | 0             |
| S17_extracted_k141_125784 | 1616          | No       | NA              | 0           | 1              | Not-determined   | Genome-fragment | NA           | 0             |
| S11_vv_k141_51168  full   | 1001          | No       | NA              | 0           | 0              | Low-quality      | Genome-fragment | 2.21         | 0             |
| S13_extracted_38304       | 1001          | No       | NA              | 0           | 1              | Low-quality      | Genome-fragment | 2.36         | 0             |
| S13_vv_77868  full        | 1001          | No       | NA              | 0           | 2              | Low-quality      | Genome-fragment | 1.16         | 0             |
| S17_extracted_k141_103755 | 3384          | No       | NA              | 0           | 2              | Not-determined   | Genome-fragment | NA           | 0             |
| S17_extracted_k141_150151 | 1201          | No       | NA              | 0           | 1              | Not-determined   | Genome-fragment | NA           | 0             |
| S17_extracted_k141_7719   | 8499          | No       | NA              | 0           | 2              | Not-determined   | Genome-fragment | NA           | 0             |
| S17_extracted_k141_96427  | 5567          | No       | NA              | 0           | 3              | Not-determined   | Genome-fragment | NA           | 0             |
| S17_extracted_k141_74143  | 3989          | No       | NA              | 0           | 2              | Not-determined   | Genome-fragment | NA           | 0             |
| S17_extracted_k141_140653 | 29977         | No       | NA              | 9           | 1              | High-quality     | High-quality    | 100          | 0             |
| S14_vv_k141_103781  full  | 1001          | No       | NA              | 0           | 0              | Low-quality      | Genome-fragment | 2.52         | 0             |
| S14_vv_k141_38094  full   | 1001          | No       | NA              | 1           | 0              | Low-quality      | Genome-fragment | 2.34         | 0             |
| S2_vv_k141_121456  full   | 1001          | No       | NA              | 0           | 0              | Low-quality      | Genome-fragment | 1.84         | 0             |
| S5_vv_k141_124551  full   | 1001          | No       | NA              | 0           | 0              | Low-quality      | Genome-fragment | 1.42         | 0             |
| S17_extracted_k141_125851 | 1538          | No       | NA              | 0           | 1              | Not-determined   | Genome-fragment | NA           | 0             |
| S17_extracted_k141_125863 | 1004          | No       | NA              | 0           | 1              | Not-determined   | Genome-fragment | NA           | 0             |
| S17_extracted_k141_118507 | 4607          | No       | NA              | 0           | 1              | Not-determined   | Genome-fragment | NA           | 0             |
| S17_extracted_k141_148103 | 1806          | No       | NA              | 0           | 2              | Not-determined   | Genome-fragment | NA           | 0             |
| S17_extracted_k141_66746  | 1169          | No       | NA              | 0           | 0              | Not-determined   | Genome-fragment | NA           | 0             |
| S17_extracted_k141_7736   | 10395         | No       | NA              | 4           | Not-determined | Genome-fragment  | NA              | 0            |               |
| S7_extracted_42821        | 1001          | No       | NA              | 1           | 0              | Low-quality      | Genome-fragment | 3.7          | 0             |
| S17_extracted_k141_29997  | 1014          | No       | NA              | 0           | 1              | Not-determined   | Genome-fragment | NA           | 0             |
| S17_extracted_k141_81413  | 1113          | No       | NA              | 0           | 1              | Not-determined   | Genome-fragment | NA           | 0             |
| S17_extracted_k141_125059 | 2865          | No       | NA              | 0           | 4              | Not-determined   | Genome-fragment | NA           | 0             |
| S7_vv_34835  full         | 1001          | No       | NA              | 0           | 0              | Low-quality      | Genome-fragment | 2.02         | 0             |
| S17_extracted_k141_140720 | 1189          | No       | NA              | 0           | 2              | Not-determined   | Genome-fragment | NA           | 0             |
| S17_extracted_k141_1734   | 1057          | No       | NA              | 0           | 0              | Not-determined   | Genome-fragment | NA           | 0             |
| S17_extracted_k141_148160 | 1921          | No       | NA              | 0           | 1              | Not-determined   | Genome-fragment | NA           | 0             |
| S17_extracted_k141_170225 | 1194          | No       | NA              | 0           | 1              | Not-determined   | Genome-fragment | NA           | 0             |
| S17_extracted_k141_289    | 1451          | No       | NA              | 0           | 0              | Not-determined   | Genome-fragment | NA           | 0             |
| S17_extracted_k141_125919 | 3054          | No       | NA              | 0           | 1              | Not-determined   | Genome-fragment | NA           | 0             |
| S17_extracted_k141_52092  | 1025          | No       | NA              | 0           | 1              | Not-determined   | Genome-fragment | NA           | 0             |
| S17_extracted_k141_292    | 1320          | No       | NA              | 0           | 0              | Not-determined   | Genome-fragment | NA           | 0             |
| S17_extracted_k141_103850 | 4010          | No       | NA              | 0           | 2              | Not-determined   | Genome-fragment | NA           | 0             |
| S16_vv_54557  full        | 1001          | No       | NA              | 1           | 0              | Low-quality      | Genome-fragment | 2.23         | 0             |
| S17_extracted_k141_111083 | 1216          | No       | NA              | 0           | 0              | Not-determined   | Genome-fragment | NA           | 0             |
| S17_extracted_k141_140766 | 1060          | No       | NA              | 0           | 1              | Not-determined   | Genome-fragment | NA           | 0             |
| S10_extracted_36455       | 1001          | No       | NA              | 0           | 0              | Low-quality      | Genome-fragment | 1.67         | 0             |
| S17_extracted_k141_308    | 1380          | No       | NA              | 0           | 1              | Not-determined   | Genome-fragment | NA           | 0             |
| S17_extracted_k141_111096 | 1865          | No       | NA              | 0           | 1              | Not-determined   | Genome-fragment | NA           | 0             |
| S10_extracted_121167      | 1001          | No       | NA              | 1           | 0              | Low-quality      | Genome-fragment | 2.1          | 0             |
| S15_extracted_35980       | 1001          | No       | NA              | 0           | 0              | Low-quality      | Genome-fragment | 0.59         | 0             |
| S17_extracted_k141_59560  | 1097          | No       | NA              | 0           | 1              | Not-determined   | Genome-fragment | NA           | 0             |
| S17_extracted_k141_325    | 1150          | No       | NA              | 0           | 1              | Not-determined   | Genome-fragment | NA           | 0             |
| S17_extracted_k141_103878 | 4149          | No       | NA              | 0           | 2              | Not-determined   | Genome-fragment | NA           | 0             |
| S17_extracted_k141_140802 | 1355          | No       | NA              | 0           | 0              | Not-determined   | Genome-fragment | NA           | 0             |
| S17_extracted_k141_133305 | 1241          | No       | NA              | 0           | 0              | Not-determined   | Genome-fragment | NA           | 0             |
| S17_extracted_k141_103897 | 1916          | No       | NA              | 0           | 2              | Not-determined   | Genome-fragment | NA           | 0             |
| S15_vv_55331  H2gene      | 1001          | No       | NA              | 1           | 0              | Low-quality      | Genome-fragment | 1.74         | 0             |
| S17_extracted_k141_15078  | 1448          | No       | NA              | 2           | 1              | Not-determined   | Genome-fragment | NA           | 0             |
| S17_extracted_k141_162900 | 1901          | No       | NA              | 0           | 2              | Not-determined   | Genome-fragment | NA           | 0             |
| S17_extracted_k141_88970  | 1004          | No       | NA              | 0           | 0              | Not-determined   | Genome-fragment | NA           | 0             |
| S17_extracted_k141_66837  | 4239          | No       | NA              | 0           | 6              | Not-determined   | Genome-fragment | NA           | 0             |
| S17_extracted_k141_74318  | 1672          | No       | NA              | 0           | 0              | Not-determined   | Genome-fragment | NA           | 0             |
| S17_extracted_k141_360    | 1192          | No       | NA              | 0           | 1              | Not-determined   | Genome-fragment | NA           | 0             |
| S17_extracted_k141_103928 | 3523          | No       | NA              | 0           | 2              | Not-determined   | Genome-fragment | NA           | 0             |
| S17_extracted_k141_118620 | 7750          | No       | NA              | 0           | 1              | Not-determined   | Genome-fragment | NA           | 0             |
| S8_vv_k141_207951  full   | 1001          | No       | NA              | 0           | 0              | Low-quality      | Genome-fragment | 1.7          | 0             |
| S17_extracted_k141_162911 | 1228          | No       | NA              | 0           | 0              | Not-determined   | Genome-fragment | NA           | 0             |
| S17_extracted_k141_118725 | 5411          | No       | NA              | 0           | 1              | Not-determined   | Genome-fragment | NA           | 0             |
| S17_extracted_k141_103956 | 1065          | No       | NA              | 0           | 0              | Not-determined   | Genome-fragment | NA           | 0             |
| S17_extracted_k141_19145  | 1002          | No       | NA              | 0           | 0              | Low-quality      | Genome-fragment | 2.19         | 0             |
| S17_extracted_k141_148250 | 2661          | No       | NA              | 0           | 3              | Not-determined   | Genome-fragment | NA           | 0             |
| S17_extracted_k141_52179  | 2308          | No       | NA              | 0           | 0              | Not-determined   | Genome-fragment | NA           | 0             |
| S17_extracted_k141_22444  | 1253          | No       | NA              | 0           | 0              | Not-determined   | Genome-fragment | NA           | 0             |
| S6_vv_k141_127737  full   | 1002          | No       | NA              | 0           | 1              | Low-quality      | Genome-fragment | 1.49         | 0             |
| S17_extracted_k141_175    | 1698          | No       | NA              | 0           | 0              | Not-determined   | Genome-fragment | NA           | 0             |
| S17_extracted_k141_103966 | 3099          | No       | NA              | 0           | 1              | Not-determined   | Genome-fragment | NA           | 0             |
| S17_extracted_k141_52191  | 1853          | No       | NA              | 0           | 7              | Not-determined   | Genome-fragment | NA           | 0             |
| S5_vv_k141_116068  H2gene | 1002          | No       | NA              | 0           | 0              | Low-quality      | Genome-fragment | 2.18         | 0             |
| S17_extracted_k141_30095  | 1520          | No       | NA              | 0           | 1              | Not-determined   | Genome-fragment | NA           | 0             |
| S17_extracted_k141_52200  | 3371          | No       | NA              | 0           | 3              | Not-determined</ |                 |              |               |



|                            |       |      |    |    |    |                |                 |       |   |
|----------------------------|-------|------|----|----|----|----------------|-----------------|-------|---|
| S17_extracted_k141_132283  | 1003  | No   | NA | 0  | 1  | Low-quality    | Genome-fragment | 0.56  | 0 |
| S17_extracted_k141_118801  | 3245  | No   | NA | 0  | 4  | Not-determined | Genome-fragment | NA    | 0 |
| S17_extracted_k141_126044  | 1468  | No   | NA | 0  | 1  | Not-determined | Genome-fragment | NA    | 0 |
| S17_extracted_k141_111282  | 1013  | No   | NA | 0  | 1  | Not-determined | Genome-fragment | NA    | 0 |
| S17_extracted_k141_552     | 5196  | No   | NA | 0  | 2  | Not-determined | Genome-fragment | NA    | 0 |
| S17_extracted_k141_8018    | 5489  | No   | NA | 0  | 5  | Not-determined | Genome-fragment | NA    | 0 |
| S11_vs_k141_967331 full    | 1003  | No   | NA | 0  | 0  | Low-quality    | Genome-fragment | 2.23  | 0 |
| S17_extracted_k141_133531  | 1521  | No   | NA | 0  | 0  | Not-determined | Genome-fragment | NA    | 0 |
| S14_extracted_k141_6928    | 1003  | No   | NA | 0  | 1  | Low-quality    | Genome-fragment | 7.2   | 0 |
| S17_extracted_k141_8050    | 2872  | No   | NA | 0  | 3  | Not-determined | Genome-fragment | NA    | 0 |
| S17_extracted_k141_584     | 3364  | No   | NA | 0  | 0  | Not-determined | Genome-fragment | NA    | 0 |
| S17_extracted_k141_170448  | 1537  | No   | NA | 0  | 0  | Not-determined | Genome-fragment | NA    | 0 |
| S1_extracted_k141_81469    | 1003  | No   | NA | 0  | 0  | Low-quality    | Genome-fragment | 0.57  | 0 |
| S17_extracted_k141_66932   | 1547  | No   | NA | 0  | 0  | Not-determined | Genome-fragment | NA    | 0 |
| S17_extracted_k141_44926   | 1269  | No   | NA | 0  | 0  | Not-determined | Genome-fragment | NA    | 0 |
| S1_extracted_k141_115287   | 1003  | No   | NA | 0  | 1  | Low-quality    | Genome-fragment | 2.44  | 0 |
| S3_vs_k141_32391 full      | 1003  | No   | NA | 0  | 0  | Low-quality    | Genome-fragment | 1.47  | 0 |
| S3_vs_k141_31771 full      | 1003  | No   | NA | 0  | 0  | Low-quality    | Genome-fragment | 0.47  | 0 |
| S17_extracted_k141_30324   | 4069  | No   | NA | 0  | 10 | Not-determined | Genome-fragment | NA    | 0 |
| S17_extracted_k141_59748   | 4284  | No   | NA | 0  | 0  | Not-determined | Genome-fragment | NA    | 0 |
| S17_extracted_k141_104146  | 9281  | No   | NA | 0  | 4  | Not-determined | Genome-fragment | NA    | 0 |
| S17_extracted_k141_37716   | 1127  | No   | NA | 0  | 0  | Not-determined | Genome-fragment | NA    | 0 |
| S5_vs_k141_61075 full      | 1003  | No   | NA | 0  | 0  | Low-quality    | Genome-fragment | 1.87  | 0 |
| S5_vs_k141_56289 full      | 1003  | No   | NA | 0  | 0  | Low-quality    | Genome-fragment | 2.52  | 0 |
| S17_extracted_k141_30343   | 1381  | No   | NA | 0  | 1  | Not-determined | Genome-fragment | NA    | 0 |
| S17_extracted_k141_16312   | 3357  | No   | NA | 0  | 0  | Not-determined | Genome-fragment | NA    | 0 |
| S17_extracted_k141_155748  | 1055  | No   | NA | 0  | 0  | Not-determined | Genome-fragment | NA    | 0 |
| S5_vs_k141_11041 full      | 1003  | No   | NA | 0  | 0  | Low-quality    | Genome-fragment | 2.46  | 0 |
| S7_extracted_134444        | 1003  | No   | NA | 0  | 0  | Low-quality    | Genome-fragment | 1.69  | 0 |
| S17_extracted_k141_163119  | 3054  | No   | NA | 0  | 0  | Not-determined | Genome-fragment | NA    | 0 |
| S17_extracted_k141_81651   | 1298  | No   | NA | 0  | 1  | Not-determined | Genome-fragment | NA    | 0 |
| S17_extracted_k141_8166    | 1199  | No   | NA | 0  | 1  | Not-determined | Genome-fragment | NA    | 0 |
| S17_extracted_k141_118902  | 1030  | No   | NA | 0  | 1  | Not-determined | Genome-fragment | NA    | 0 |
| S17_extracted_k141_104215  | 1034  | No   | NA | 0  | 1  | Not-determined | Genome-fragment | NA    | 0 |
| S17_extracted_k141_30360   | 3612  | No   | NA | 0  | 4  | Not-determined | Genome-fragment | NA    | 0 |
| S7_vs_98447 full           | 1003  | No   | NA | 0  | 0  | Low-quality    | Genome-fragment | 2.46  | 0 |
| S17_extracted_k141_15341   | 1807  | No   | NA | 0  | 0  | Not-determined | Genome-fragment | NA    | 0 |
| S17_extracted_k141_74585   | 1420  | No   | NA | 0  | 2  | Not-determined | Genome-fragment | NA    | 0 |
| S17_extracted_k141_89166   | 3513  | No   | NA | 0  | 3  | Not-determined | Genome-fragment | NA    | 0 |
| S16_extracted_160405       | 1003  | No   | NA | 0  | 0  | Low-quality    | Genome-fragment | 1.62  | 0 |
| S17_extracted_k141_96608   | 5512  | No   | NA | 0  | 2  | Not-determined | Genome-fragment | NA    | 0 |
| S17_extracted_k141_148503  | 1613  | No   | NA | 0  | 0  | Not-determined | Genome-fragment | NA    | 0 |
| S17_extracted_k141_30375   | 6432  | No   | NA | 0  | 0  | Not-determined | Genome-fragment | NA    | 0 |
| S17_extracted_k141_66986   | 4689  | No   | NA | 0  | 3  | Not-determined | Genome-fragment | NA    | 0 |
| S17_extracted_k141_104252  | 1602  | No   | NA | 0  | 1  | Not-determined | Genome-fragment | NA    | 0 |
| S16_vs_144302 full         | 1003  | No   | NA | 0  | 0  | Low-quality    | Genome-fragment | 1.65  | 0 |
| S17_extracted_k141_163185  | 1167  | No   | NA | 0  | 1  | Not-determined | Genome-fragment | NA    | 0 |
| S16_vs_51529 H2gene        | 1003  | No   | NA | 1  | 0  | Low-quality    | Genome-fragment | 1.69  | 0 |
| S17_extracted_k141_133619  | 1184  | No   | NA | 0  | 2  | Not-determined | Genome-fragment | NA    | 0 |
| S17_extracted_k141_148557  | 1119  | No   | NA | 0  | 2  | Not-determined | Genome-fragment | NA    | 0 |
| S10_extracted_39139        | 1003  | No   | NA | 1  | 0  | Low-quality    | Genome-fragment | 0.41  | 0 |
| S17_extracted_k141_104000  | 1884  | No   | NA | 0  | 0  | Not-determined | Genome-fragment | NA    | 0 |
| S17_extracted_k141_118943  | 2862  | No   | NA | 0  | 2  | Not-determined | Genome-fragment | NA    | 0 |
| S17_extracted_k141_705     | 1588  | No   | NA | 0  | 1  | Not-determined | Genome-fragment | NA    | 0 |
| S17_extracted_k141_148586  | 1124  | No   | NA | 0  | 0  | Not-determined | Genome-fragment | NA    | 0 |
| S17_extracted_k141_30469   | 1787  | No   | NA | 0  | 3  | Not-determined | Genome-fragment | NA    | 0 |
| S17_extracted_k141_111470  | 2103  | No   | NA | 0  | 2  | Not-determined | Genome-fragment | NA    | 0 |
| S17_extracted_k141_67042   | 15604 | No   | NA | 7  | 0  | Medium-quality | Genome-fragment | 79.04 | 0 |
| S17_extracted_k141_67045   | 1420  | No   | NA | 0  | 2  | Not-determined | Genome-fragment | NA    | 0 |
| S17_extracted_k141_30483   | 1021  | No   | NA | 0  | 1  | Not-determined | Genome-fragment | NA    | 0 |
| S12_extracted_k141_59921   | 1003  | No   | NA | 1  | 0  | Low-quality    | Genome-fragment | 2.48  | 0 |
| S17_extracted_k141_45013   | 1250  | No   | NA | 0  | 1  | Not-determined | Genome-fragment | NA    | 0 |
| S17_extracted_k141_45037   | 3760  | No   | NA | 0  | 4  | Not-determined | Genome-fragment | NA    | 0 |
| S17_extracted_k141_89281   | 2613  | No   | NA | 0  | 0  | Not-determined | Genome-fragment | NA    | 0 |
| S12_vs_k141_85076 full     | 1003  | No   | NA | 1  | 1  | Low-quality    | Genome-fragment | 0.59  | 0 |
| S8_extracted_k141_151251   | 1003  | No   | NA | 0  | 0  | Low-quality    | Genome-fragment | 1.6   | 0 |
| S17_extracted_k141_74698   | 4576  | No   | NA | 0  | 1  | Not-determined | Genome-fragment | NA    | 0 |
| S8_vs_k141_10426 full      | 1003  | No   | NA | 1  | 0  | Low-quality    | Genome-fragment | 2.87  | 0 |
| S9_vs_k141_15171 full      | 1004  | No   | NA | 0  | 0  | Low-quality    | Genome-fragment | 2.84  | 0 |
| S17_extracted_k141_67107   | 1966  | No   | NA | 0  | 3  | Not-determined | Genome-fragment | NA    | 0 |
| S11_extracted_k141_1385    | 1004  | No   | NA | 0  | 0  | Low-quality    | Genome-fragment | 1.2   | 0 |
| S17_extracted_k141_96666   | 5565  | No   | NA | 0  | 1  | Not-determined | Genome-fragment | NA    | 0 |
| S17_extracted_k141_52580   | 1925  | No   | NA | 0  | 1  | Not-determined | Genome-fragment | NA    | 0 |
| S17_extracted_k141_45090   | 1474  | No   | NA | 0  | 1  | Not-determined | Genome-fragment | NA    | 0 |
| S17_extracted_k141_163118  | 35575 | No   | NA | 13 | 3  | Not-determined | Genome-fragment | NA    | 0 |
| S17_extracted_k141_723     | 1330  | No   | NA | 0  | 1  | Not-determined | Genome-fragment | NA    | 0 |
| S14_extracted_k141_741     | 4944  | No   | NA | 0  | 1  | Not-determined | Genome-fragment | NA    | 0 |
| S11_vs_k141_18151 H2gene   | 1004  | No   | NA | 1  | 0  | Low-quality    | Genome-fragment | 1.6   | 0 |
| S1_extracted_k141_90584    | 1004  | No   | NA | 0  | 0  | Low-quality    | Genome-fragment | 1.63  | 0 |
| S17_extracted_k141_156032  | 1388  | No   | NA | 0  | 1  | Not-determined | Genome-fragment | NA    | 0 |
| S11_extracted_k141_62774   | 1004  | No   | NA | 0  | 0  | Low-quality    | Genome-fragment | 2.23  | 0 |
| S3_extracted_k141_40043    | 1004  | No   | NA | 0  | 0  | Low-quality    | Genome-fragment | 0.53  | 0 |
| S17_extracted_k141_52646   | 2055  | No   | NA | 0  | 0  | Not-determined | Genome-fragment | NA    | 0 |
| S7_extracted_191           | 1004  | No   | NA | 3  | 0  | Low-quality    | Genome-fragment | 3.29  | 0 |
| S7_vs_118782 full          | 1004  | No   | NA | 0  | 0  | Low-quality    | Genome-fragment | 2.16  | 0 |
| S12_extracted_k141_68470   | 1004  | No   | NA | 0  | 0  | Low-quality    | Genome-fragment | 2.8   | 0 |
| S17_extracted_k141_104502  | 1996  | No   | NA | 0  | 4  | Not-determined | Genome-fragment | NA    | 0 |
| S15_vs_38927 H2gene        | 1004  | No   | NA | 1  | 0  | Low-quality    | Genome-fragment | 0.59  | 0 |
| S8_extracted_k141_101213   | 1004  | No   | NA | 0  | 0  | Low-quality    | Genome-fragment | 1.65  | 0 |
| S17_extracted_k141_52666   | 1218  | No   | NA | 0  | 1  | Not-determined | Genome-fragment | NA    | 0 |
| S17_extracted_k141_115161  | 2200  | No   | NA | 0  | 1  | Not-determined | Genome-fragment | NA    | 0 |
| S17_extracted_k141_30555   | 1218  | No   | NA | 0  | 1  | Not-determined | Genome-fragment | NA    | 0 |
| S17_extracted_k141_170798  | 1206  | No   | NA | 0  | 1  | Not-determined | Genome-fragment | NA    | 0 |
| S17_extracted_k141_133740  | 1116  | No   | NA | 0  | 1  | Not-determined | Genome-fragment | NA    | 0 |
| S8_extracted_k141_23826    | 1004  | No   | NA | 0  | 1  | Low-quality    | Genome-fragment | 0.16  | 0 |
| S17_extracted_k141_30571   | 2857  | No   | NA | 0  | 2  | Not-determined | Genome-fragment | NA    | 0 |
| S17_extracted_k141_813     | 1333  | No   | NA | 0  | 2  | Not-determined | Genome-fragment | NA    | 0 |
| S17_extracted_k141_52703   | 1360  | No   | NA | 0  | 2  | Not-determined | Genome-fragment | NA    | 0 |
| S17_extracted_k141_12861   | 1299  | No   | NA | 0  | 3  | Not-determined | Genome-fragment | NA    | 0 |
| S8_vs_k141_90820 full      | 1004  | No   | NA | 1  | 0  | Low-quality    | Genome-fragment | 2.04  | 0 |
| S8_vs_k141_102971 full     | 1004  | No   | NA | 0  | 0  | Low-quality    | Genome-fragment | 2.69  | 0 |
| S9_extracted_k141_57957    | 1005  | No   | NA | 0  | 0  | Low-quality    | Genome-fragment | 1.03  | 0 |
| S17_extracted_k141_15435   | 3278  | No   | NA | 0  | 1  | Not-determined | Genome-fragment | NA    | 0 |
| S17_extracted_k141_1634816 | 1234  | No   | NA | 0  | 1  | Not-determined | Genome-fragment | NA    | 0 |
| S13_vs_47062 full          | 1005  | No   | NA | 0  | 0  | Low-quality    | Genome-fragment | 1.38  | 0 |
| S17_extracted_k141_52735   | 2262  | No   | NA | 0  | 2  | Not-determined | Genome-fragment | NA    | 0 |
| S14_vs_k141_122391 H2gene  | 1005  | No   | NA | 1  | 0  | Low-quality    | Genome-fragment | 2.53  | 0 |
| S5_extracted_k141_141743   | 1005  | No   | NA | 0  | 0  | Low-quality    | Genome-fragment | 2.27  | 0 |
| S5_extracted_k141_82725    | 1005  | No   | NA | 0  | 0  | Low-quality    | Genome-fragment | 3.15  | 0 |
| S17_extracted_94514        | 1005  | No   | NA | 1  | 0  | Low-quality    | Genome-fragment | 1.74  | 0 |
| S17_extracted_k141_104002  | 6411  | No   | NA | 0  | 3  | Not-determined | Genome-fragment | NA    | 0 |
| S17_extracted_k141_163469  | 1318  | No   | NA | 0  | 2  | Not-determined | Genome-fragment | NA    | 0 |
| S17_extracted_k141_148795  | 2365  | No   | NA | 0  | 2  | Not-determined | Genome-fragment | NA    | 0 |
| S17_extracted_k141_96865   | 1299  | No   | NA | 0  | 2  | Not-determined | Genome-fragment | NA    | 0 |
| S17_extracted_k141_52760   | 1200  | No   | NA | 0  | 2  | Not-determined | Genome-fragment | NA    | 0 |
| S17_extracted_k141_59974   | 1491  | No   | NA | 0  | 0  | Not-determined | Genome-fragment | NA    | 0 |
| S7_extracted_95140         | 1005  | No   | NA | 1  | 0  | Low-quality    | Genome-fragment | 2.51  | 0 |
| S17_extracted_k141_170896  | 1414  | No   | NA | 3  | 3  | Not-determined | Genome-fragment | NA    | 0 |
| S7_vs_27460 H2gene         | 1005  | No   | NA | 2  | 0  | Low-quality    | Genome-fragment | 1.64  | 0 |
| S17_extracted_k141_38122   | 2556  | No   | NA | 0  | 0  | Not-determined | Genome-fragment | NA    | 0 |
| S7_vs_130379 H2gene        | 1005  | No   | NA | 1  | 0  | Low-quality    | Genome-fragment | 2.2   | 0 |
| S17_extracted_k141_67336   | 1420  | No   | NA | 0  | 2  | Not-determined | Genome-fragment | NA    | 0 |
| S17_extracted_k141_156182  | 3292  | No   | NA | 0  | 3  | Not-determined | Genome-fragment | NA    | 0 |
| S17_extracted_k141_67348   | 1062  | No   | NA | 0  | 2  | Not-determined | Genome-fragment | NA    | 0 |
| S17_extracted_k141_148847  | 1056  | No   | NA | 0  | 2  | Not-determined | Genome-fragment | NA    | 0 |
| S17_extracted_k141_38135   | 1366  | No   | NA | 0  | 0  | Not-determined | Genome-fragment | NA    | 0 |
| S12_vs_k141_18476 full     | 1005  | No   | NA | 1  | 0  | Low-quality    | Genome-fragment | 2.58  | 0 |
| S17_extracted_k141_60005   | 1011  | No   | NA | 0  | 0  | Not-determined | Genome-fragment | NA    | 0 |
| S17_extracted_k141_133782  | 1012  | No   | NA | 0  | 0  | Not-determined | Genome-fragment | NA    | 0 |
| S17_extracted_k141_917     | 1345  | No   | NA | 0  | 0  | Not-determined | Genome-fragment | NA    | 0 |
| S17_extracted_k141_1634483 | 13324 | No   | NA | 0  | 8  | Not-determined | Genome-fragment | NA    | 0 |
| S12_vs_k141_88895 full     | 1005  | No   | NA | 1  | 0  | Low-quality    | Genome-fragment | 1.89  | 0 |
| S17_extracted_k141_15488   | 1385  | No   | NA | 0  | 0  | Not-determined | Genome-fragment | NA    | 0 |
| S17_extracted_k141_81895   | 1965  | No   | NA | 0  | 2  | Not-determined | Genome-fragment | NA    | 0 |
| S12_vs_k141_170791 H2gene  | 1005  | No   | NA | 1  | 0  | Low-quality    | Genome-fragment | 2.67  | 0 |
| S17_extracted_k141_15500   | 3715  | No   | NA | 0  | 1  | Not-determined | Genome-fragment | NA    | 0 |
| S8_extracted_k141_194279   | 1005  | No   | NA | 2  | 0  | Low-quality    | Genome-fragment | 1.64  | 0 |
| S17_extracted_k141_60043   | 3615  | No   | NA | 0  | 3  | Not-determined | Genome-fragment | NA    | 0 |
| S17_extracted_k141_126375  | 1153  | No   | NA | 0  | 1  | Not-determined | Genome-fragment | NA    | 0 |
| S17_extracted_k141_126377  | 1290  | No   | NA | 0  | 1  | Not-determined | Genome-fragment | NA    | 0 |
| S17_extracted_k141_52874   | 1455  | No   | NA | 0  | 1  | Not-determined | Genome-fragment | NA    | 0 |
| S17_extracted_k141_8399    | 1895  | No   | NA | 0  | 0  | Not-determined | Genome-fragment | NA    | 0 |
| S17_extracted_k141_60070   | 1303  | No   | NA | 0  | 0  | Not-determined | Genome-fragment | NA    | 0 |
| S17_extracted_k141_12934   | 1201  | No   | NA | 0  | 1  | Not-determined | Genome-fragment | NA    | 0 |
| S17_extracted_k141_60072   | 4027  | No</ |    |    |    |                |                 |       |   |



|                            |       |    |   |    |                |                 |    |       |
|----------------------------|-------|----|---|----|----------------|-----------------|----|-------|
| S17_extracted_k141_96079   | 6240  | NA | 0 | 0  | Not-determined | Genome-fragment | NA | 0     |
| S17_extracted_k141_149025  | 9454  | NA | 0 | 0  | Not-determined | Genome-fragment | NA | 0     |
| S17_extracted_k141_133906  | 2780  | NA | 0 | 0  | Not-determined | Genome-fragment | NA | 0     |
| S17_extracted_k141_133911  | 1132  | NA | 0 | 2  | Not-determined | Genome-fragment | NA | 0     |
| S17_extracted_k141_30735   | 1668  | NA | 0 | 1  | Not-determined | Genome-fragment | NA | 0     |
| S3_extracted_k141_48668    | 1006  | NA | 2 | 0  | Low-quality    | Genome-fragment | NA | 2.67  |
| S3_vs_k141_49491  full     | 1006  | NA | 0 | 0  | Low-quality    | Genome-fragment | NA | 2.08  |
| S17_extracted_k141_8537    | 1286  | NA | 0 | 3  | Not-determined | Genome-fragment | NA | 0     |
| S17_extracted_k141_171083  | 3839  | NA | 0 | 0  | Not-determined | Genome-fragment | NA | 0     |
| S3_vs_k141_6461  H2gene    | 1006  | NA | 1 | 0  | Low-quality    | Genome-fragment | NA | 1.98  |
| S17_extracted_k141_60192   | 2372  | NA | 0 | 1  | Not-determined | Genome-fragment | NA | 0     |
| S17_extracted_k141_133930  | 6713  | NA | 0 | 0  | Not-determined | Genome-fragment | NA | 0     |
| S5_vs_k141_106119  H2gene  | 1006  | NA | 1 | 0  | Low-quality    | Genome-fragment | NA | 2.17  |
| S17_extracted_k141_22989   | 1709  | NA | 0 | 2  | Not-determined | Genome-fragment | NA | 0     |
| S7_extracted_15759         | 1006  | NA | 0 | 0  | Low-quality    | Genome-fragment | NA | 2.48  |
| S17_extracted_k141_119294  | 1512  | NA | 0 | 1  | Not-determined | Genome-fragment | NA | 0     |
| S17_extracted_k141_119298  | 1119  | NA | 0 | 0  | Not-determined | Genome-fragment | NA | 0     |
| S17_extracted_k141_57040   | 1776  | NA | 0 | 1  | Not-determined | Genome-fragment | NA | 0     |
| S7_vs_72156  full          | 1006  | NA | 0 | 0  | Low-quality    | Genome-fragment | NA | 2.27  |
| S17_extracted_k141_156416  | 3077  | NA | 0 | 1  | Not-determined | Genome-fragment | NA | 0     |
| S17_extracted_k141_149089  | 1071  | NA | 0 | 2  | Not-determined | Genome-fragment | NA | 0     |
| S7_vs_92999  full          | 1006  | NA | 0 | 0  | Low-quality    | Genome-fragment | NA | 2.17  |
| S17_extracted_k141_8558    | 1989  | NA | 0 | 2  | Not-determined | Genome-fragment | NA | 0     |
| S17_extracted_k141_81980   | 1155  | NA | 0 | 0  | Not-determined | Genome-fragment | NA | 0     |
| S17_extracted_k141_81983   | 1138  | NA | 0 | 1  | Not-determined | Genome-fragment | NA | 0     |
| S17_extracted_k141_171112  | 1249  | NA | 0 | 0  | Not-determined | Genome-fragment | NA | 0     |
| S17_extracted_k141_119329  | 3081  | NA | 0 | 4  | Not-determined | Genome-fragment | NA | 0     |
| S17_extracted_k141_87505   | 1015  | NA | 0 | 1  | Not-determined | Genome-fragment | NA | 0     |
| S17_extracted_k141_81995   | 1111  | NA | 0 | 1  | Not-determined | Genome-fragment | NA | 0     |
| S17_extracted_k141_38337   | 1755  | NA | 0 | 1  | Not-determined | Genome-fragment | NA | 0     |
| S17_extracted_k141_156478  | 1850  | NA | 0 | 0  | Not-determined | Genome-fragment | NA | 0     |
| S17_extracted_k141_163630  | 1491  | NA | 0 | 1  | Not-determined | Genome-fragment | NA | 0     |
| S17_extracted_k141_8633    | 1273  | NA | 0 | 0  | Not-determined | Genome-fragment | NA | 0     |
| S17_extracted_k141_104007  | 1049  | NA | 0 | 1  | Not-determined | Genome-fragment | NA | 0     |
| S17_extracted_k141_104009  | 1120  | NA | 0 | 1  | Not-determined | Genome-fragment | NA | 0     |
| S17_extracted_k141_60285   | 3748  | NA | 0 | 1  | Not-determined | Genome-fragment | NA | 0     |
| S17_extracted_k141_149148  | 2401  | NA | 0 | 2  | Not-determined | Genome-fragment | NA | 0     |
| S17_extracted_k141_141531  | 2781  | NA | 0 | 2  | Not-determined | Genome-fragment | NA | 0     |
| S17_extracted_k141_23081   | 1380  | NA | 0 | 1  | Not-determined | Genome-fragment | NA | 0     |
| S17_extracted_k141_149160  | 4262  | NA | 0 | 1  | Not-determined | Genome-fragment | NA | 0     |
| S17_extracted_k141_82062   | 6098  | NA | 0 | 1  | Not-determined | Genome-fragment | NA | 0     |
| S17_extracted_k141_1415154 | 2085  | NA | 0 | 2  | Not-determined | Genome-fragment | NA | 0     |
| S17_extracted_k141_38390   | 1513  | NA | 0 | 1  | Not-determined | Genome-fragment | NA | 0     |
| S17_extracted_k141_149184  | 6097  | NA | 0 | 4  | Not-determined | Genome-fragment | NA | 0     |
| S17_extracted_k141_13083   | 1464  | NA | 0 | 0  | Not-determined | Genome-fragment | NA | 0     |
| S7_vs_31082  H2gene        | 1006  | NA | 0 | 0  | Low-quality    | Genome-fragment | NA | 2.08  |
| S17_extracted_k141_119398  | 1675  | NA | 0 | 0  | Not-determined | Genome-fragment | NA | 0     |
| S17_extracted_k141_60313   | 4923  | NA | 0 | 2  | Not-determined | Genome-fragment | NA | 0     |
| S17_extracted_k141_156036  | 5414  | NA | 0 | 1  | Not-determined | Genome-fragment | NA | 0     |
| S17_extracted_k141_141611  | 1433  | NA | 0 | 0  | Not-determined | Genome-fragment | NA | 0     |
| S17_extracted_k141_111517  | 1460  | NA | 0 | 0  | Not-determined | Genome-fragment | NA | 0     |
| S17_extracted_k141_104952  | 6446  | NA | 0 | 12 | Not-determined | Genome-fragment | NA | 0     |
| S16_vs_70296  full         | 1006  | NA | 1 | 0  | Low-quality    | Genome-fragment | NA | 0.65  |
| S17_extracted_k141_97187   | 1090  | NA | 0 | 2  | Not-determined | Genome-fragment | NA | 0     |
| S17_extracted_k141_97188   | 1222  | NA | 0 | 1  | Not-determined | Genome-fragment | NA | 0     |
| S17_extracted_k141_111931  | 17015 | NA | 9 | 0  | Medium-quality | Genome-fragment | NA | 78.9  |
| S17_extracted_k141_111932  | 1047  | NA | 0 | 0  | Not-determined | Genome-fragment | NA | 0     |
| S17_extracted_k141_67633   | 1376  | NA | 0 | 0  | Not-determined | Genome-fragment | NA | 0     |
| S17_extracted_k141_119454  | 1275  | NA | 0 | 2  | Not-determined | Genome-fragment | NA | 0     |
| S17_extracted_k141_119459  | 1067  | NA | 0 | 0  | Not-determined | Genome-fragment | NA | 0     |
| S17_extracted_k141_1171    | 3021  | NA | 0 | 3  | Not-determined | Genome-fragment | NA | 0     |
| S17_extracted_k141_1173    | 5366  | NA | 0 | 4  | Not-determined | Genome-fragment | NA | 0     |
| S12_extracted_k141_175897  | 1006  | NA | 0 | 0  | Low-quality    | Genome-fragment | NA | 2.24  |
| S17_extracted_k141_119476  | 2243  | NA | 0 | 1  | Not-determined | Genome-fragment | NA | 0     |
| S17_extracted_k141_15781   | 1091  | NA | 0 | 2  | Not-determined | Genome-fragment | NA | 0     |
| S17_extracted_k141_21881   | 1186  | NA | 0 | 1  | Not-determined | Genome-fragment | NA | 0     |
| S12_vs_k141_14186  full    | 1006  | NA | 0 | 0  | Low-quality    | Genome-fragment | NA | 1.65  |
| S17_extracted_k141_134107  | 1604  | NA | 0 | 1  | Not-determined | Genome-fragment | NA | 0     |
| S17_extracted_k141_30960   | 7498  | NA | 0 | 1  | Not-determined | Genome-fragment | NA | 0     |
| S17_extracted_k141_134131  | 1351  | NA | 0 | 0  | Not-determined | Genome-fragment | NA | 0     |
| S17_extracted_k141_1208    | 1847  | NA | 0 | 1  | Not-determined | Genome-fragment | NA | 0     |
| S17_extracted_k141_1575    | 2517  | NA | 0 | 1  | Not-determined | Genome-fragment | NA | 0     |
| S17_extracted_k141_1209    | 1157  | NA | 0 | 1  | Not-determined | Genome-fragment | NA | 0     |
| S4_extracted_15922         | 1006  | NA | 0 | 0  | Low-quality    | Genome-fragment | NA | 1.98  |
| S17_extracted_k141_134144  | 1486  | NA | 0 | 1  | Not-determined | Genome-fragment | NA | 0     |
| S17_extracted_k141_12219   | 2097  | NA | 0 | 1  | Not-determined | Genome-fragment | NA | 0     |
| S17_extracted_k141_134152  | 3206  | NA | 0 | 3  | Not-determined | Genome-fragment | NA | 0     |
| S17_extracted_k141_13244   | 2677  | NA | 0 | 7  | Not-determined | Genome-fragment | NA | 0     |
| S17_extracted_k141_67768   | 1238  | NA | 0 | 3  | Not-determined | Genome-fragment | NA | 0     |
| S17_extracted_k141_149358  | 5104  | NA | 0 | 5  | Not-determined | Genome-fragment | NA | 0     |
| S17_extracted_k141_82160   | 1578  | NA | 0 | 0  | Not-determined | Genome-fragment | NA | 0     |
| S17_extracted_k141_97302   | 1877  | NA | 0 | 0  | Not-determined | Genome-fragment | NA | 0     |
| S17_extracted_k141_8811    | 3030  | NA | 0 | 2  | Not-determined | Genome-fragment | NA | 0     |
| S17_extracted_k141_97304   | 1690  | NA | 0 | 0  | Not-determined | Genome-fragment | NA | 0     |
| S17_extracted_k141_85721   | 1391  | NA | 0 | 0  | Not-determined | Genome-fragment | NA | 0     |
| S17_extracted_k141_97313   | 2426  | NA | 0 | 2  | Not-determined | Genome-fragment | NA | 0     |
| S17_extracted_k141_171354  | 1664  | NA | 0 | 1  | Not-determined | Genome-fragment | NA | 0     |
| S17_extracted_k141_131055  | 1170  | NA | 0 | 0  | Not-determined | Genome-fragment | NA | 0     |
| S4_extracted_28750         | 1006  | NA | 1 | 0  | Low-quality    | Genome-fragment | NA | 1.24  |
| S17_extracted_k141_67808   | 1040  | NA | 0 | 0  | Not-determined | Genome-fragment | NA | 0     |
| S17_extracted_k141_87809   | 3656  | NA | 0 | 2  | Not-determined | Genome-fragment | NA | 0     |
| S17_extracted_k141_85776   | 1110  | NA | 0 | 0  | Not-determined | Genome-fragment | NA | 0     |
| S17_extracted_k141_105174  | 2119  | NA | 0 | 0  | Not-determined | Genome-fragment | NA | 0     |
| S17_extracted_k141_134213  | 1121  | NA | 0 | 0  | Not-determined | Genome-fragment | NA | 0     |
| S17_extracted_k141_13326   | 3488  | NA | 0 | 0  | Not-determined | Genome-fragment | NA | 0     |
| S17_extracted_k141_1305    | 1223  | NA | 0 | 0  | Not-determined | Genome-fragment | NA | 0     |
| S17_extracted_k141_38610   | 1128  | NA | 0 | 1  | Not-determined | Genome-fragment | NA | 0     |
| S11_extracted_k141_13453   | 1007  | NA | 1 | 0  | Low-quality    | Genome-fragment | NA | 2.52  |
| S17_extracted_k141_82209   | 1816  | NA | 0 | 0  | Not-determined | Genome-fragment | NA | 0     |
| S14_extracted_k141_64403   | 1007  | NA | 0 | 0  | Low-quality    | Genome-fragment | NA | 2.43  |
| S17_extracted_k141_1326    | 4515  | NA | 0 | 3  | Not-determined | Genome-fragment | NA | 1.75  |
| S14_vs_k141_118931  full   | 1007  | NA | 0 | 1  | Low-quality    | Genome-fragment | NA | 3.75  |
| S14_vs_k141_117104  H2gene | 1007  | NA | 0 | 0  | Low-quality    | Genome-fragment | NA | 0     |
| S17_extracted_k141_156690  | 1215  | NA | 0 | 0  | Not-determined | Genome-fragment | NA | 1.7   |
| S1_vs_k141_33075  full     | 1007  | NA | 0 | 0  | Low-quality    | Genome-fragment | NA | 1.75  |
| S3_vs_k141_8400  full      | 1007  | NA | 0 | 1  | Low-quality    | Genome-fragment | NA | 0     |
| S17_extracted_k141_90048   | 1668  | NA | 0 | 1  | Not-determined | Genome-fragment | NA | 0     |
| S17_extracted_k141_87842   | 1020  | NA | 0 | 1  | Not-determined | Genome-fragment | NA | 0     |
| S17_extracted_k141_31113   | 1257  | NA | 0 | 0  | Not-determined | Genome-fragment | NA | 0     |
| S17_extracted_k141_31130   | 1031  | NA | 0 | 0  | Not-determined | Genome-fragment | NA | 0     |
| S17_extracted_k141_45870   | 1058  | NA | 0 | 1  | Not-determined | Genome-fragment | NA | 0     |
| S17_extracted_k141_13322   | 5416  | NA | 0 | 0  | Not-determined | Genome-fragment | NA | 0     |
| S17_extracted_k141_112062  | 9822  | NA | 0 | 4  | Not-determined | Genome-fragment | NA | 0     |
| S17_extracted_k141_141820  | 3748  | NA | 0 | 2  | Not-determined | Genome-fragment | NA | 0     |
| S5_vs_k141_40275  H2gene   | 1007  | NA | 0 | 0  | Low-quality    | Genome-fragment | NA | 2.15  |
| S17_extracted_k141_163905  | 1490  | NA | 0 | 1  | Not-determined | Genome-fragment | NA | 0     |
| S17_extracted_k141_38722   | 1330  | NA | 0 | 0  | Not-determined | Genome-fragment | NA | 0     |
| S17_extracted_k141_87482   | 4501  | NA | 0 | 4  | Not-determined | Genome-fragment | NA | 0     |
| S17_extracted_k141_15647   | 1650  | NA | 0 | 0  | Not-determined | Genome-fragment | NA | 0     |
| S17_extracted_k141_156749  | 1027  | NA | 0 | 1  | Not-determined | Genome-fragment | NA | 0     |
| S7_extracted_39146         | 1201  | NA | 0 | 1  | Not-determined | Genome-fragment | NA | 17.19 |
| S17_extracted_k141_45897   | 1007  | NA | 0 | 0  | Low-quality    | Genome-fragment | NA | 0     |
| S17_extracted_k141_97495   | 1308  | NA | 0 | 2  | Not-determined | Genome-fragment | NA | 0     |
| S17_extracted_k141_149552  | 3585  | NA | 0 | 2  | Not-determined | Genome-fragment | NA | 0     |
| S7_vs_83089  full          | 1263  | NA | 0 | 1  | Not-determined | Genome-fragment | NA | 0     |
| S16_vs_141486  full        | 1007  | NA | 1 | 0  | Low-quality    | Genome-fragment | NA | 2.64  |
| S17_extracted_k141_87982   | 1007  | NA | 0 | 0  | Low-quality    | Genome-fragment | NA | 2.75  |
| S17_extracted_k141_163947  | 2492  | NA | 0 | 0  | Not-determined | Genome-fragment | NA | 0     |
| S17_extracted_k141_75269   | 1858  | NA | 0 | 0  | Not-determined | Genome-fragment | NA | 0     |
| S17_extracted_k141_171533  | 2816  | NA | 0 | 0  | Not-determined | Genome-fragment | NA | 0     |
| S17_extracted_k141_9038    | 1139  | NA | 0 | 4  | Not-determined | Genome-fragment | NA | 0     |
| S16_vs_101805  full        | 6973  | NA | 1 | 0  | Low-quality    | Genome-fragment | NA | 1.77  |
| S10_extracted_13937        | 1007  | NA | 0 | 1  | Low-quality    | Genome-fragment | NA | 2.24  |
| S12_vs_k141_71560  full    | 1007  | NA | 0 | 0  | Low-quality    | Genome-fragment | NA | 2.12  |
| S12_vs_k141_7266  full     | 1007  | NA | 0 | 0  | Low-quality    | Genome-fragment | NA | 1.58  |
| S12_vs_k141_98405  H2gene  | 1007  | NA | 2 | 0  | Low-quality    | Genome-fragment | NA | 2.72  |
| S4_extracted_30862         | 1998  | NA | 0 | 4  | Not-determined | Genome-fragment | NA | 0     |
| S17_extracted_k141_1436    | 1007  | NA | 1 | 0  | Low-quality    | Genome-fragment | NA | 3.45  |
| S17_extracted_k141_119722  | 1020  | NA | 0 | 1  | Not-determined | Genome-fragment | NA | 0     |
| S17_extracted_k141_88673   | 1008  | NA | 0 | 0  | Low-quality    | Genome-fragment | NA | 1.13  |
| S17_extracted_k141_50134   | 1411  | NA | 0 | 0  | Not-determined | Genome-fragment | NA | 0     |
| S9_vs_k141_22028  full     | 1008  | NA | 1 | 0  | Low-quality    | Genome-fragment | NA | 1.7   |
| S17_extracted_k141_156859  | 2120  | NA | 0 | 2  | Not-determined | Genome-fragment | NA | 0     |
| S17_extracted_k141_97593   | 2255  | NA | 0 | 0  | Not-determined | Genome-fragment | NA | 0     |
| S17_extracted_k141_105339  | 3885  | NA | 0 | 4  | Not-determined | Genome-fragment | NA | 0     |
| S13_extracted_96258        | 1008  | NA | 0 | 0  | Low-quality    | Genome-fragment | NA | 1.65  |
| S17_extracted_k141_20152   | 6420  | NA | 0 | 3  | Not-determined | Genome-fragment | NA | 0     |
| S17_extracted_k141_23427   | 3217  | NA | 0 | 0  | Not-determined | Genome-fragment | NA | 0     |
| S11_extracted_k141_85332   | 1008  | NA | 0 | 0  | Low-quality    | Genome-fragment | NA | 2.17  |
| S1_vs_k141_45610  full     | 1008  | NA | 2 | 0  | Low-quality    | Genome-fragment | NA | 3.67  |
| S17_extracted_k141_126712  | 3710  | NA | 0 | 1  | Not-determined | Genome-fragment | NA | 0     |
| S17_extracted_k141_23438   | 2315  | NA | 0 | 1  | Not-determined | Genome-fragment | NA | 0     |
| S3_vs_k141_22444  H2gene   | 1008  | NA | 2 | 0  | Low-quality    | Genome-fragment | NA | 3.52  |
| S17_extracted_k141_119793  | 1005  | NA |   |    |                |                 |    |       |



|                           |       |    |    |   |   |                |                 |       |   |
|---------------------------|-------|----|----|---|---|----------------|-----------------|-------|---|
| S16_vs_106372  full       | 1008  | No | NA | 0 | 2 | Low-quality    | Genome-fragment | 1.48  | 0 |
| S10_extracted_105084      | 1008  | No | NA | 1 | 0 | Low-quality    | Genome-fragment | 0.75  | 0 |
| S10_vs_50884  full        | 1008  | No | NA | 1 | 0 | Low-quality    | Genome-fragment | 2.36  | 0 |
| S17_extracted_k141_112260 | 7608  | No | NA | 0 | 3 | Not-determined | Genome-fragment | NA    | 0 |
| S17_extracted_k141_112262 | 1617  | No | NA | 0 | 0 | Not-determined | Genome-fragment | NA    | 0 |
| S17_extracted_k141_112263 | 1416  | No | NA | 0 | 0 | Not-determined | Genome-fragment | NA    | 0 |
| S17_extracted_k141_46168  | 1375  | No | NA | 0 | 1 | Not-determined | Genome-fragment | NA    | 0 |
| S12_vs_k141_6004  full    | 1008  | No | NA | 0 | 0 | Low-quality    | Genome-fragment | 2.49  | 0 |
| S17_extracted_k141_119879 | 1140  | No | NA | 0 | 1 | Not-determined | Genome-fragment | NA    | 0 |
| S12_vs_k141_45981  full   | 1008  | No | NA | 1 | 0 | Low-quality    | Genome-fragment | 1.49  | 0 |
| S6_extracted_k141_10626   | 1008  | No | NA | 0 | 0 | Low-quality    | Genome-fragment | 2.94  | 0 |
| S17_extracted_k141_21376  | 3477  | No | NA | 0 | 1 | Not-determined | Genome-fragment | NA    | 0 |
| S17_extracted_k141_16048  | 1130  | No | NA | 0 | 0 | Not-determined | Genome-fragment | NA    | 0 |
| S17_extracted_k141_46200  | 1300  | No | NA | 0 | 1 | Not-determined | Genome-fragment | NA    | 0 |
| S8_vs_k141_46080  full    | 1008  | No | NA | 3 | 0 | Low-quality    | Genome-fragment | 3.28  | 0 |
| S8_vs_k141_48484  full    | 1008  | No | NA | 0 | 0 | Low-quality    | Genome-fragment | 2.5   | 0 |
| S17_extracted_k141_173456 | 1009  | No | NA | 1 | 0 | Low-quality    | Genome-fragment | 1.84  | 0 |
| S17_extracted_k141_23561  | 10746 | No | NA | 0 | 1 | Not-determined | Genome-fragment | NA    | 0 |
| S17_extracted_k141_124536 | 1381  | No | NA | 2 | 0 | Not-determined | Genome-fragment | NA    | 0 |
| S1_vs_k141_65959  full    | 1009  | No | NA | 0 | 0 | Low-quality    | Genome-fragment | 1.12  | 0 |
| S3_vs_k141_115291  H2gene | 4659  | No | NA | 0 | 4 | Not-determined | Genome-fragment | NA    | 0 |
| S17_extracted_k141_75386  | 1009  | No | NA | 1 | 0 | Low-quality    | Genome-fragment | 0.83  | 0 |
| S17_extracted_k141_75386  | 1714  | No | NA | 0 | 2 | Not-determined | Genome-fragment | NA    | 0 |
| S17_extracted_k141_31400  | 1138  | No | NA | 0 | 2 | Not-determined | Genome-fragment | NA    | 0 |
| S17_extracted_k141_126911 | 4870  | No | NA | 0 | 0 | Not-determined | Genome-fragment | NA    | 0 |
| S5_vs_k141_14724  full    | 1009  | No | NA | 0 | 0 | Low-quality    | Genome-fragment | 3.34  | 0 |
| S17_extracted_92265       | 1009  | No | NA | 1 | 0 | Low-quality    | Genome-fragment | 3.42  | 0 |
| S17_extracted_k141_53775  | 1687  | No | NA | 0 | 1 | Not-determined | Genome-fragment | NA    | 0 |
| S12_vs_k141_28258  full   | 1009  | No | NA | 0 | 0 | Low-quality    | Genome-fragment | 1.47  | 0 |
| S17_extracted_k141_126939 | 7777  | No | NA | 0 | 2 | Not-determined | Genome-fragment | NA    | 0 |
| S17_extracted_k141_75428  | 3639  | No | NA | 0 | 1 | Not-determined | Genome-fragment | NA    | 0 |
| S17_extracted_k141_68163  | 2015  | No | NA | 0 | 0 | Not-determined | Genome-fragment | NA    | 0 |
| S17_extracted_k141_9292   | 4260  | No | NA | 0 | 1 | Not-determined | Genome-fragment | NA    | 0 |
| S17_extracted_k141_164171 | 2581  | No | NA | 0 | 1 | Not-determined | Genome-fragment | NA    | 0 |
| S17_extracted_k141_97860  | 1118  | No | NA | 0 | 0 | Not-determined | Genome-fragment | NA    | 0 |
| S12_vs_k141_100538  full  | 1009  | No | NA | 0 | 0 | Low-quality    | Genome-fragment | 2.99  | 0 |
| S15_vs_3058  H2gene       | 1009  | No | NA | 1 | 0 | Low-quality    | Genome-fragment | 2.35  | 0 |
| S17_extracted_k141_68184  | 2117  | No | NA | 0 | 0 | Not-determined | Genome-fragment | NA    | 0 |
| S17_extracted_k141_126961 | 4475  | No | NA | 1 | 0 | Not-determined | Genome-fragment | NA    | 0 |
| S4_extracted_3078         | 1009  | No | NA | 1 | 0 | Low-quality    | Genome-fragment | 1.87  | 0 |
| S4_extracted_3732         | 1009  | No | NA | 1 | 0 | Low-quality    | Genome-fragment | 2.46  | 0 |
| S17_extracted_k141_1715   | 1771  | No | NA | 1 | 1 | Not-determined | Genome-fragment | NA    | 0 |
| S17_extracted_k141_157123 | 1385  | No | NA | 0 | 1 | Not-determined | Genome-fragment | NA    | 0 |
| S17_extracted_k141_1718   | 3785  | No | NA | 0 | 1 | Not-determined | Genome-fragment | NA    | 0 |
| S17_extracted_k141_16139  | 1199  | No | NA | 0 | 0 | Not-determined | Genome-fragment | NA    | 0 |
| S17_extracted_k141_1724   | 1016  | No | NA | 0 | 1 | Not-determined | Genome-fragment | NA    | 0 |
| S17_extracted_k141_75438  | 2354  | No | NA | 0 | 2 | Not-determined | Genome-fragment | NA    | 0 |
| S17_extracted_k141_105067 | 1420  | No | NA | 0 | 2 | Not-determined | Genome-fragment | NA    | 0 |
| S17_extracted_k141_46347  | 1603  | No | NA | 0 | 0 | Not-determined | Genome-fragment | NA    | 0 |
| S17_extracted_k141_16148  | 1008  | No | NA | 0 | 1 | Not-determined | Genome-fragment | NA    | 0 |
| S6_extracted_k141_14830   | 1009  | No | NA | 1 | 0 | Low-quality    | Genome-fragment | 2.21  | 0 |
| S17_extracted_k141_13728  | 4355  | No | NA | 0 | 0 | Not-determined | Genome-fragment | NA    | 0 |
| S17_extracted_k141_134648 | 1280  | No | NA | 0 | 0 | Not-determined | Genome-fragment | NA    | 0 |
| S6_extracted_k141_7947    | 1009  | No | NA | 0 | 0 | Low-quality    | Genome-fragment | 0.76  | 0 |
| S17_extracted_k141_4613   | 1010  | No | NA | 0 | 1 | Low-quality    | Genome-fragment | 0.56  | 0 |
| S17_extracted_k141_171571 | 1616  | No | NA | 0 | 4 | Not-determined | Genome-fragment | NA    | 0 |
| S17_extracted_k141_127008 | 1838  | No | NA | 0 | 1 | Not-determined | Genome-fragment | NA    | 0 |
| S17_extracted_k141_65150  | 1010  | No | NA | 0 | 0 | Low-quality    | Genome-fragment | 0.58  | 0 |
| S17_extracted_k141_53877  | 1017  | No | NA | 0 | 0 | Not-determined | Genome-fragment | NA    | 0 |
| S17_vs_k141_95253  H2gene | 1010  | No | NA | 0 | 0 | Low-quality    | Genome-fragment | 2.1   | 0 |
| S17_extracted_k141_171579 | 5947  | No | NA | 0 | 5 | Not-determined | Genome-fragment | NA    | 0 |
| S17_extracted_k141_164125 | 1480  | No | NA | 0 | 0 | Not-determined | Genome-fragment | NA    | 0 |
| S17_extracted_k141_31519  | 1924  | No | NA | 0 | 2 | Not-determined | Genome-fragment | NA    | 0 |
| S11_vs_k141_1814  H2gene  | 1010  | No | NA | 1 | 0 | Low-quality    | Genome-fragment | 2.36  | 0 |
| S17_extracted_k141_142297 | 2583  | No | NA | 0 | 1 | Not-determined | Genome-fragment | NA    | 0 |
| S17_extracted_k141_46388  | 23386 | No | NA | 5 | 0 | Medium-quality | Genome-fragment | 52.03 | 0 |
| S13_extracted_101293      | 1010  | No | NA | 0 | 1 | Low-quality    | Genome-fragment | 1.46  | 0 |
| S17_extracted_k141_157161 | 7596  | No | NA | 0 | 4 | Not-determined | Genome-fragment | NA    | 0 |
| S14_extracted_k141_16471  | 1010  | No | NA | 0 | 0 | Low-quality    | Genome-fragment | 21.17 | 0 |
| S17_extracted_k141_149941 | 3463  | No | NA | 0 | 2 | Not-determined | Genome-fragment | NA    | 0 |
| S17_extracted_k141_19078  | 1655  | No | NA | 0 | 1 | Not-determined | Genome-fragment | NA    | 0 |
| S17_extracted_k141_134712 | 2690  | No | NA | 0 | 1 | Not-determined | Genome-fragment | NA    | 0 |
| S3_vs_k141_104545  full   | 1010  | No | NA | 0 | 0 | Low-quality    | Genome-fragment | 2.39  | 0 |
| S17_extracted_k141_134726 | 1084  | No | NA | 0 | 0 | Not-determined | Genome-fragment | NA    | 0 |
| S5_extracted_k141_11564   | 1010  | No | NA | 0 | 0 | Low-quality    | Genome-fragment | 1.85  | 0 |
| S17_extracted_k141_60854  | 1385  | No | NA | 0 | 0 | Not-determined | Genome-fragment | NA    | 0 |
| S17_extracted_k141_82734  | 3208  | No | NA | 0 | 1 | Not-determined | Genome-fragment | NA    | 0 |
| S17_extracted_k141_134742 | 8096  | No | NA | 0 | 6 | Not-determined | Genome-fragment | NA    | 0 |
| S17_extracted_k141_46426  | 1257  | No | NA | 0 | 0 | Not-determined | Genome-fragment | NA    | 0 |
| S17_extracted_k141_134749 | 1792  | No | NA | 0 | 1 | Not-determined | Genome-fragment | NA    | 0 |
| S17_extracted_k141_127121 | 1176  | No | NA | 0 | 2 | Not-determined | Genome-fragment | NA    | 0 |
| S17_extracted_k141_60896  | 1048  | No | NA | 0 | 1 | Not-determined | Genome-fragment | NA    | 0 |
| S17_extracted_k141_150016 | 1186  | No | NA | 0 | 0 | Not-determined | Genome-fragment | NA    | 0 |
| S17_extracted_k141_16303  | 2220  | No | NA | 0 | 1 | Not-determined | Genome-fragment | NA    | 0 |
| S17_extracted_k141_58321  | 2300  | No | NA | 0 | 1 | Not-determined | Genome-fragment | NA    | 0 |
| S17_extracted_k141_90329  | 1021  | No | NA | 0 | 1 | Not-determined | Genome-fragment | NA    | 0 |
| S17_extracted_k141_98059  | 1466  | No | NA | 0 | 0 | Not-determined | Genome-fragment | NA    | 0 |
| S17_extracted_k141_75542  | 3532  | No | NA | 0 | 2 | Not-determined | Genome-fragment | NA    | 0 |
| S17_extracted_k141_58071  | 1150  | No | NA | 0 | 1 | Not-determined | Genome-fragment | NA    | 0 |
| S17_extracted_k141_16327  | 1160  | No | NA | 0 | 1 | Not-determined | Genome-fragment | NA    | 0 |
| S17_extracted_k141_134801 | 1171  | No | NA | 0 | 0 | Not-determined | Genome-fragment | NA    | 0 |
| S17_extracted_k141_112408 | 1078  | No | NA | 0 | 1 | Not-determined | Genome-fragment | NA    | 0 |
| S5_extracted_k141_21571   | 1010  | No | NA | 0 | 0 | Low-quality    | Genome-fragment | 2.14  | 0 |
| S17_extracted_k141_157227 | 1099  | No | NA | 0 | 0 | Not-determined | Genome-fragment | NA    | 0 |
| S17_extracted_k141_147431 | 2644  | No | NA | 0 | 3 | Not-determined | Genome-fragment | NA    | 0 |
| S7_extracted_86679        | 1010  | No | NA | 1 | 0 | Low-quality    | Genome-fragment | 2.33  | 0 |
| S7_vs_65712  full         | 1010  | No | NA | 0 | 0 | Low-quality    | Genome-fragment | 2.53  | 0 |
| S17_extracted_k141_150078 | 3466  | No | NA | 0 | 2 | Not-determined | Genome-fragment | NA    | 0 |
| S17_extracted_k141_39241  | 1044  | No | NA | 0 | 1 | Not-determined | Genome-fragment | NA    | 0 |
| S7_vs_130232  full        | 1010  | No | NA | 1 | 0 | Low-quality    | Genome-fragment | 2.74  | 0 |
| S17_extracted_k141_134855 | 1869  | No | NA | 0 | 0 | Not-determined | Genome-fragment | NA    | 0 |
| S17_extracted_k141_164399 | 1612  | No | NA | 0 | 2 | Not-determined | Genome-fragment | NA    | 0 |
| S17_extracted_k141_157254 | 1248  | No | NA | 0 | 1 | Not-determined | Genome-fragment | NA    | 0 |
| S17_extracted_k141_11661  | 16460 | No | NA | 0 | 8 | Not-determined | Genome-fragment | NA    | 0 |
| S17_extracted_k141_171739 | 1016  | No | NA | 0 | 0 | Not-determined | Genome-fragment | NA    | 0 |
| S17_extracted_k141_98150  | 1479  | No | NA | 0 | 1 | Not-determined | Genome-fragment | NA    | 0 |
| S17_extracted_k141_98151  | 1051  | No | NA | 0 | 1 | Not-determined | Genome-fragment | NA    | 0 |
| S17_extracted_k141_23923  | 2619  | No | NA | 0 | 1 | Not-determined | Genome-fragment | NA    | 0 |
| S12_extracted_k141_185331 | 1010  | No | NA | 0 | 0 | Low-quality    | Genome-fragment | 1.08  | 0 |
| S17_extracted_k141_68464  | 1626  | No | NA | 0 | 1 | Not-determined | Genome-fragment | NA    | 0 |
| S17_extracted_k141_164558 | 1129  | No | NA | 0 | 1 | Not-determined | Genome-fragment | NA    | 0 |
| S17_extracted_k141_68471  | 1287  | No | NA | 0 | 1 | Not-determined | Genome-fragment | NA    | 0 |
| S17_extracted_k141_61003  | 6593  | No | NA | 0 | 1 | Not-determined | Genome-fragment | NA    | 0 |
| S17_extracted_k141_23943  | 1300  | No | NA | 0 | 0 | Not-determined | Genome-fragment | NA    | 0 |
| S8_extracted_k141_31236   | 1010  | No | NA | 0 | 0 | Low-quality    | Genome-fragment | 1.56  | 0 |
| S17_extracted_k141_134904 | 2489  | No | NA | 0 | 2 | Not-determined | Genome-fragment | NA    | 0 |
| S17_extracted_k141_46520  | 1035  | No | NA | 0 | 2 | Not-determined | Genome-fragment | NA    | 0 |
| S8_extracted_k141_169984  | 1010  | No | NA | 0 | 0 | Low-quality    | Genome-fragment | 0.68  | 0 |
| S17_extracted_k141_16384  | 3560  | No | NA | 0 | 2 | Not-determined | Genome-fragment | NA    | 0 |
| S17_extracted_k141_150177 | 5880  | No | NA | 0 | 3 | Not-determined | Genome-fragment | NA    | 0 |
| S17_extracted_k141_99338  | 1153  | No | NA | 0 | 1 | Not-determined | Genome-fragment | NA    | 0 |
| S17_extracted_k141_68488  | 3540  | No | NA | 0 | 3 | Not-determined | Genome-fragment | NA    | 0 |
| S17_extracted_k141_1963   | 1253  | No | NA | 0 | 2 | Not-determined | Genome-fragment | NA    | 0 |
| S17_extracted_k141_1976   | 1000  | No | NA | 0 | 1 | Not-determined | Genome-fragment | NA    | 0 |
| S17_extracted_k141_75656  | 6319  | No | NA | 0 | 2 | Not-determined | Genome-fragment | NA    | 0 |
| S17_extracted_k141_25648  | 1011  | No | NA | 1 | 0 | Low-quality    | Genome-fragment | 1.77  | 0 |
| S17_extracted_k141_82878  | 2389  | No | NA | 0 | 1 | Not-determined | Genome-fragment | NA    | 0 |
| S11_vs_k141_4498  full    | 1011  | No | NA | 0 | 0 | Low-quality    | Genome-fragment | 2.36  | 0 |
| S17_extracted_k141_112668 | 1080  | No | NA | 0 | 2 | Not-determined | Genome-fragment | NA    | 0 |
| S17_extracted_k141_2019   | 7010  | No | NA | 0 | 5 | Not-determined | Genome-fragment | NA    | 0 |
| S17_extracted_k141_112678 | 1222  | No | NA | 0 | 0 | Not-determined | Genome-fragment | NA    | 0 |
| S17_extracted_k141_105981 | 5717  | No | NA | 0 | 0 | Not-determined | Genome-fragment | NA    | 0 |
| S17_extracted_k141_75728  | 1714  | No | NA | 0 | 1 | Not-determined | Genome-fragment | NA    | 0 |
| S17_extracted_k141_31795  | 1059  | No | NA | 0 | 0 | Not-determined | Genome-fragment | NA    | 0 |
| S17_extracted_k141_164530 | 7653  | No | NA | 0 | 4 | Not-determined | Genome-fragment | NA    | 0 |
| S17_extracted_k141_127316 | 7067  | No | NA | 0 | 0 | Not-determined | Genome-fragment | NA    | 0 |
| S11_vs_k141_5958  full    | 1011  | No | NA | 1 | 0 | Low-quality    | Genome-fragment | 1.32  | 0 |
| S17_extracted_k141_105005 | 1539  | No | NA | 0 | 2 | Not-determined | Genome-fragment | NA    | 0 |
| S11_vs_k141_323651  full  | 1011  | No | NA | 0 | 1 | Low-quality    | Genome-fragment | 0.76  | 0 |
| S14_vs_k141_9507  full    | 1011  | No | NA | 0 | 0 | Low-quality    | Genome-fragment | 2.36  | 0 |
| S17_extracted_k141_24071  | 1625  | No | NA | 0 | 2 | Not-determined | Genome-fragment | NA    | 0 |
| S17_extracted_k141_39472  | 1724  | No | NA | 0 | 1 | Not-determined | Genome-fragment | NA    | 0 |
| S17_extracted_k141_164578 | 2901  | No | NA | 0 | 2 | Not-determined | Genome-fragment | NA    | 0 |
| S17_extracted_k141_164581 | 1059  | No | NA | 0 | 1 | Not-determined | Genome-fragment | NA    | 0 |
| S17_extracted_k141_164594 |       |    |    |   |   |                |                 |       |   |



|                             |       |    |     |   |                |                 |                 |    |       |
|-----------------------------|-------|----|-----|---|----------------|-----------------|-----------------|----|-------|
| S17_extracted_k141_112825   | 10015 | No | NA  | 0 | 5              | Not-determined  | Genome-fragment | NA | 0     |
| S17_extracted_k141_10603    | 4504  | No | NA  | 0 | 2              | Not-determined  | Genome-fragment | NA | 0     |
| S17_extracted_k141_16642    | 1088  | No | NA  | 0 | 1              | Not-determined  | Genome-fragment | NA | 0     |
| S17_extracted_k141_24162    | NA    | No | NA  | 0 | 2              | Not-determined  | Genome-fragment | NA | 0     |
| S16_vs_114251[full]         | 1011  | No | NA  | 0 | 2              | Low-quality     | Genome-fragment | NA | 0     |
| S16_vs_103149[full]         | 1011  | No | NA  | 0 | 0              | Low-quality     | Genome-fragment | NA | 0.93  |
| S17_extracted_k141_171935   | 6402  | No | NA  | 0 | 3              | Not-determined  | Genome-fragment | NA | 2.34  |
| S17_extracted_k141_75969    | 1482  | No | NA  | 0 | 2              | Not-determined  | Genome-fragment | NA | 0     |
| S17_extracted_k141_75978    | 1323  | No | NA  | 0 | 2              | Not-determined  | Genome-fragment | NA | 0     |
| S16_vs_122521[full]         | 1011  | No | NA  | 1 | 0              | Low-quality     | Genome-fragment | NA | 0.55  |
| S17_extracted_k141_46758    | 1003  | No | NA  | 0 | 1              | Not-determined  | Genome-fragment | NA | 0     |
| S17_extracted_k141_164740   | 1132  | No | NA  | 0 | 0              | Not-determined  | Genome-fragment | NA | 0     |
| S16_vs_146223[full]         | 1011  | No | NA  | 0 | 1              | Low-quality     | Genome-fragment | NA | 1.97  |
| S17_extracted_k141_90646    | 1010  | No | NA  | 0 | 0              | Not-determined  | Genome-fragment | NA | 0     |
| S12_vs_k141_152159[ln2gene] | 1011  | No | NA  | 1 | 0              | Low-quality     | Genome-fragment | NA | 2.36  |
| S17_extracted_k141_14308    | 1479  | No | NA  | 0 | 2              | Not-determined  | Genome-fragment | NA | 0     |
| S17_extracted_k141_75995    | 2091  | No | NA  | 0 | 2              | Not-determined  | Genome-fragment | NA | 0     |
| S17_extracted_k141_157646   | 4408  | No | NA  | 0 | 4              | Not-determined  | Genome-fragment | NA | 0     |
| S17_extracted_k141_135123   | 1944  | No | NA  | 0 | 1              | Not-determined  | Genome-fragment | NA | 0     |
| S17_extracted_k141_16684    | 5628  | No | NA  | 0 | 3              | Not-determined  | Genome-fragment | NA | 0     |
| S2_extracted_k141_18439     | 1011  | No | NA  | 2 | 0              | Low-quality     | Genome-fragment | NA | 3.35  |
| S17_extracted_k141_164794   | 1035  | No | NA  | 0 | 0              | Not-determined  | Genome-fragment | NA | 0     |
| S8_extracted_k141_89738     | 1011  | No | NA  | 1 | 0              | Low-quality     | Genome-fragment | NA | 0.65  |
| S17_extracted_k141_39662    | 2852  | No | NA  | 0 | 2              | Not-determined  | Genome-fragment | NA | 0     |
| S11_extracted_k141_5905     | 1012  | No | NA  | 1 | 0              | Low-quality     | Genome-fragment | NA | 2.41  |
| S17_extracted_k141_157704   | 3316  | No | NA  | 0 | 0              | Not-determined  | Genome-fragment | NA | 0     |
| S17_extracted_k141_61145    | 1668  | No | NA  | 0 | 0              | Not-determined  | Genome-fragment | NA | 0     |
| S17_extracted_k141_16727    | 1262  | No | NA  | 0 | 1              | Not-determined  | Genome-fragment | NA | 0     |
| S17_extracted_k141_61157    | 1615  | No | NA  | 1 | Not-determined | Genome-fragment | NA              | 0  |       |
| S13_vs_13096[full]          | 1012  | No | NA  | 0 | 0              | Low-quality     | Genome-fragment | NA | 2.34  |
| S17_extracted_k141_127523   | 2734  | No | NA  | 0 | 0              | Not-determined  | Genome-fragment | NA | 0     |
| S17_extracted_k141_150513   | 5399  | No | NA  | 0 | 3              | Not-determined  | Genome-fragment | NA | 0     |
| S17_extracted_k141_142879   | 1431  | No | NA  | 0 | 1              | Not-determined  | Genome-fragment | NA | 0     |
| S17_extracted_k141_39705    | 1455  | No | NA  | 0 | 2              | Not-determined  | Genome-fragment | NA | 0     |
| S17_extracted_k141_112983   | 1105  | No | NA  | 0 | 0              | Not-determined  | Genome-fragment | NA | 0     |
| S17_extracted_k141_142888   | 4620  | No | NA  | 0 | 2              | Not-determined  | Genome-fragment | NA | 0     |
| S17_extracted_k141_68904    | 3651  | No | NA  | 0 | 5              | Not-determined  | Genome-fragment | NA | 0     |
| S14_vs_k141_29841[full]     | 1012  | No | NA  | 1 | 0              | Low-quality     | Genome-fragment | NA | 3.06  |
| S17_extracted_k141_142906   | 1054  | No | NA  | 2 | Not-determined | Genome-fragment | NA              | 0  |       |
| S17_extracted_k141_112997   | 3284  | No | NA  | 0 | 2              | Not-determined  | Genome-fragment | NA | 0     |
| S17_extracted_k141_120642   | 1289  | No | NA  | 0 | 0              | Not-determined  | Genome-fragment | NA | 0     |
| S17_extracted_k141_76093    | 1101  | No | NA  | 0 | 2              | Not-determined  | Genome-fragment | NA | 0     |
| S14_vs_k141_100260[full]    | 1012  | No | NA  | 0 | 1              | Low-quality     | Genome-fragment | NA | 0.27  |
| S17_extracted_k141_54395    | 2162  | No | NA  | 0 | 2              | Not-determined  | Genome-fragment | NA | 0     |
| S17_extracted_k141_33080    | 3380  | No | NA  | 0 | 1              | Not-determined  | Genome-fragment | NA | 0     |
| S17_extracted_k141_142940   | 1161  | No | NA  | 0 | 1              | Not-determined  | Genome-fragment | NA | 0     |
| S17_extracted_k141_46832    | 3512  | No | NA  | 0 | 2              | Not-determined  | Genome-fragment | NA | 0     |
| S14_vs_k141_56602[full]     | 1012  | No | NA  | 1 | 0              | Low-quality     | Genome-fragment | NA | 2.47  |
| S17_extracted_k141_69083    | 1720  | No | NA  | 0 | 1              | Not-determined  | Genome-fragment | NA | 0     |
| S17_extracted_k141_32066    | 4099  | No | NA  | 0 | 3              | Not-determined  | Genome-fragment | NA | 0     |
| S17_extracted_k141_50804    | 1640  | No | NA  | 0 | 1              | Not-determined  | Genome-fragment | NA | 0     |
| S1_vs_k141_50343[full]      | 1012  | No | NA  | 0 | 1              | Low-quality     | Genome-fragment | NA | 1.89  |
| S17_extracted_k141_54411    | 1411  | No | NA  | 0 | 1              | Not-determined  | Genome-fragment | NA | 0     |
| S3_extracted_k141_90378     | 1012  | No | NA  | 0 | 0              | Low-quality     | Genome-fragment | NA | 1.94  |
| S17_extracted_k141_113064   | 1072  | No | NA  | 0 | 0              | Not-determined  | Genome-fragment | NA | 0     |
| S17_extracted_k141_68885    | 1159  | No | NA  | 0 | 1              | Not-determined  | Genome-fragment | NA | 0     |
| S17_extracted_k141_16789    | 1185  | No | NA  | 0 | 0              | Not-determined  | Genome-fragment | NA | 0     |
| S17_extracted_k141_12171    | 3904  | No | NA  | 0 | 3              | Not-determined  | Genome-fragment | NA | 0     |
| S3_extracted_k141_109270    | 1012  | No | NA  | 0 | 0              | Low-quality     | Genome-fragment | NA | 2.27  |
| S17_extracted_k141_150677   | 1046  | No | NA  | 0 | 2              | Not-determined  | Genome-fragment | NA | 0     |
| S17_extracted_k141_113069   | 1020  | No | NA  | 0 | 2              | Not-determined  | Genome-fragment | NA | 0     |
| S17_extracted_k141_120711   | 11346 | No | NA  | 0 | 1              | Not-determined  | Genome-fragment | NA | 0     |
| S17_extracted_k141_54439    | 1037  | No | NA  | 0 | 0              | Not-determined  | Genome-fragment | NA | 0     |
| S17_extracted_k141_32134    | 1378  | No | NA  | 0 | 2              | Not-determined  | Genome-fragment | NA | 0     |
| S17_extracted_k141_3213     | 1266  | No | NA  | 0 | 0              | Not-determined  | Genome-fragment | NA | 0     |
| S5_vs_k141_100509[ln2gene]  | 1012  | No | NA  | 1 | 0              | Low-quality     | Genome-fragment | NA | 2.58  |
| S17_extracted_k141_135243   | 1523  | No | NA  | 0 | 1              | Not-determined  | Genome-fragment | NA | 0     |
| S7_vs_113432[ln2gene]       | 1012  | No | NA  | 1 | 0              | Low-quality     | Genome-fragment | NA | 0.58  |
| S17_extracted_k141_143068   | 1465  | No | NA  | 0 | 1              | Not-determined  | Genome-fragment | NA | 0     |
| S17_extracted_k141_113118   | 5425  | No | NA  | 0 | 3              | Not-determined  | Genome-fragment | NA | 0     |
| S17_extracted_k141_3981     | 1510  | No | NA  | 0 | 0              | Not-determined  | Genome-fragment | NA | 0     |
| S17_extracted_k141_8320     | 1280  | No | NA  | 0 | 2              | Not-determined  | Genome-fragment | NA | 0     |
| S17_extracted_k141_46961    | 1651  | No | NA  | 0 | 0              | Not-determined  | Genome-fragment | NA | 0     |
| S17_extracted_k141_83214    | 3812  | No | NA  | 0 | 0              | Not-determined  | Genome-fragment | NA | 0     |
| S17_extracted_k141_10080    | 1477  | No | NA  | 0 | 0              | Not-determined  | Genome-fragment | NA | 0     |
| S17_extracted_k141_32200    | 2364  | No | NA  | 0 | 2              | Not-determined  | Genome-fragment | NA | 0     |
| S17_extracted_k141_46981    | 1092  | No | NA  | 0 | 0              | Not-determined  | Genome-fragment | NA | 0     |
| S16_extracted_107579        | 1012  | No | NA  | 0 | 0              | Low-quality     | Genome-fragment | NA | 1.43  |
| S16_vs_139941[full]         | 1012  | No | NA  | 0 | 0              | Low-quality     | Genome-fragment | NA | 2.89  |
| S17_extracted_k141_69039    | 1324  | No | NA  | 0 | 1              | Not-determined  | Genome-fragment | NA | 0     |
| S10_vs_74793[full]          | 1012  | No | NA  | 1 | 0              | Low-quality     | Genome-fragment | NA | 2.14  |
| S17_extracted_k141_98675    | 1462  | No | NA  | 1 | 0              | Not-determined  | Genome-fragment | NA | 0     |
| S17_extracted_k141_10013    | 2100  | No | NA  | 0 | 1              | Not-determined  | Genome-fragment | NA | 0     |
| S12_extracted_k141_74446    | 1012  | No | NA  | 1 | 0              | Low-quality     | Genome-fragment | NA | 1.48  |
| S17_extracted_k141_143085   | 4077  | No | NA  | 0 | 0              | Not-determined  | Genome-fragment | NA | 0     |
| S17_extracted_k141_150701   | 1012  | No | NA  | 1 | 0              | Low-quality     | Genome-fragment | NA | 1.54  |
| S8_vs_k141_86607[ln2gene]   | 1012  | No | NA  | 1 | 0              | Low-quality     | Genome-fragment | NA | 2.82  |
| S17_extracted_k141_157883   | 1250  | No | NA  | 0 | 0              | Not-determined  | Genome-fragment | NA | 0     |
| S17_extracted_k141_47026    | 14600 | No | NA  | 0 | 1              | Not-determined  | Genome-fragment | NA | 0     |
| S17_extracted_k141_143144   | 3266  | No | NA  | 0 | 0              | Not-determined  | Genome-fragment | NA | 0     |
| S17_extracted_k141_171232   | 12235 | No | NA  | 4 | 0              | Complete        | High-quality    | NA | 100   |
| S17_vs_k141_140708[full]    | 1013  | No | NA  | 0 | 0              | Low-quality     | Genome-fragment | NA | 0.4   |
| S17_extracted_k141_47033    | 1007  | No | NA  | 0 | 1              | Not-determined  | Genome-fragment | NA | 0     |
| S11_vs_k141_66539[full]     | 1013  | No | NA  | 0 | 0              | Low-quality     | Genome-fragment | NA | 0.77  |
| S11_vs_k141_28487[full]     | 1013  | No | 863 | 0 | 1              | Low-quality     | Genome-fragment | NA | 14.81 |
| S17_extracted_k141_150808   | 1882  | No | NA  | 0 | 1              | Not-determined  | Genome-fragment | NA | 0     |
| S17_extracted_k141_32304    | 1002  | No | NA  | 0 | 2              | Not-determined  | Genome-fragment | NA | 0     |
| S17_extracted_k141_164867   | 4534  | No | NA  | 0 | 4              | Not-determined  | Genome-fragment | NA | 0     |
| S11_vs_k141_71619[ln2gene]  | 1013  | No | NA  | 0 | 1              | Low-quality     | Genome-fragment | NA | 2.25  |
| S17_extracted_k141_69124    | 3765  | No | NA  | 0 | 4              | Not-determined  | Genome-fragment | NA | 0     |
| S17_extracted_k141_83302    | 1240  | No | NA  | 0 | 2              | Not-determined  | Genome-fragment | NA | 0     |
| S14_extracted_k141_73544    | 1013  | No | NA  | 0 | 0              | Low-quality     | Genome-fragment | NA | 3.31  |
| S17_extracted_k141_83315    | 1480  | No | NA  | 0 | 2              | Not-determined  | Genome-fragment | NA | 0     |
| S1_extracted_k141_78878     | 1013  | No | NA  | 0 | 0              | Low-quality     | Genome-fragment | NA | 2.11  |
| S17_extracted_k141_1376     | 1954  | No | NA  | 0 | 0              | Not-determined  | Genome-fragment | NA | 0     |
| S17_extracted_k141_98788    | 1906  | No | NA  | 0 | 0              | Not-determined  | Genome-fragment | NA | 0     |
| S5_extracted_k141_88667     | 1013  | No | NA  | 0 | 0              | Low-quality     | Genome-fragment | NA | 2.6   |
| S17_extracted_k141_90996    | 4952  | No | NA  | 0 | 1              | Not-determined  | Genome-fragment | NA | 0     |
| S17_extracted_k141_165002   | 1330  | No | NA  | 0 | 0              | Not-determined  | Genome-fragment | NA | 0     |
| S17_extracted_k141_98813    | 1495  | No | NA  | 0 | 0              | Not-determined  | Genome-fragment | NA | 0     |
| S17_extracted_k141_1395     | 1005  | No | NA  | 0 | 0              | Not-determined  | Genome-fragment | NA | 0     |
| S17_extracted_k141_10111    | 1458  | No | NA  | 0 | 0              | Not-determined  | Genome-fragment | NA | 0     |
| S5_extracted_k141_60155     | 1013  | No | NA  | 1 | 0              | Low-quality     | Genome-fragment | NA | 0.7   |
| S5_vs_k141_107997[full]     | 1013  | No | NA  | 0 | 1              | Low-quality     | Genome-fragment | NA | 1.01  |
| S17_extracted_k141_165022   | 9586  | No | NA  | 0 | 1              | Not-determined  | Genome-fragment | NA | 0     |
| S17_extracted_k141_16927    | 1061  | No | NA  | 0 | 1              | Not-determined  | Genome-fragment | NA | 0     |
| S17_extracted_k141_165026   | 2038  | No | NA  | 0 | 1              | Not-determined  | Genome-fragment | NA | 0     |
| S7_vs_96815[full]           | 1013  | No | NA  | 0 | 0              | Low-quality     | Genome-fragment | NA | 2.39  |
| S17_extracted_k141_10128    | 1611  | No | NA  | 0 | 1              | Not-determined  | Genome-fragment | NA | 0     |
| S17_extracted_k141_131355   | 1289  | No | NA  | 0 | 1              | Not-determined  | Genome-fragment | NA | 0     |
| S17_extracted_k141_165029   | 5378  | No | NA  | 0 | 4              | Not-determined  | Genome-fragment | NA | 0     |
| S17_extracted_k141_16842    | 1637  | No | NA  | 0 | 1              | Not-determined  | Genome-fragment | NA | 0     |
| S17_extracted_k141_98843    | 3684  | No | NA  | 0 | 1              | Not-determined  | Genome-fragment | NA | 0     |
| S17_extracted_k141_135444   | 5253  | No | NA  | 0 | 3              | Not-determined  | Genome-fragment | NA | 0     |
| S17_extracted_k141_14488    | 3787  | No | NA  | 0 | 0              | Not-determined  | Genome-fragment | NA | 0     |
| S17_extracted_k141_158002   | 1059  | No | NA  | 0 | 0              | Not-determined  | Genome-fragment | NA | 0     |
| S17_extracted_k141_131374   | 2910  | No | NA  | 0 | 1              | Not-determined  | Genome-fragment | NA | 0     |
| S17_extracted_k141_16912    | 1038  | No | NA  | 0 | 1              | Not-determined  | Genome-fragment | NA | 0     |
| S17_extracted_k141_16883    | 1031  | No | NA  | 0 | 0              | Not-determined  | Genome-fragment | NA | 0     |
| S16_vs_46507[full]          | 1013  | No | NA  | 1 | 0              | Low-quality     | Genome-fragment | NA | 2.04  |
| S17_extracted_k141_2430     | 1154  | No | NA  | 0 | 1              | Not-determined  | Genome-fragment | NA | 0     |
| S17_extracted_k141_132419   | 1018  | No | NA  | 0 | 0              | Not-determined  | Genome-fragment | NA | 0     |
| S16_vs_111247[full]         | 1013  | No | NA  | 0 | 1              | Low-quality     | Genome-fragment | NA | 0.99  |
| S12_vs_k141_126925[full]    | 1013  | No | NA  | 1 | 0              | Low-quality     | Genome-fragment | NA | 19.07 |
| S17_extracted_k141_143283   | 1895  | No | NA  | 0 | 0              | Not-determined  | Genome-fragment | NA | 0     |
| S17_extracted_k141_127876   | 1045  | No | NA  | 0 | 1              | Not-determined  | Genome-fragment | NA | 0     |
| S17_extracted_k141_32453    | 4714  | No | NA  | 0 | 3              | Not-determined  | Genome-fragment | NA | 0     |
| S4_extracted_25533          | 1013  | No | NA  | 0 | 0              | Low-quality     | Genome-fragment | NA | 2.92  |
| S17_extracted_k141_135506   | 3610  | No | NA  | 0 | 1              | Not-determined  | Genome-fragment | NA | 0     |
| S17_extracted_k141_32463    | 1153  | No | NA  | 0 | 0              | Not-determined  | Genome-fragment | NA | 0     |
| S17_extracted_k141_2484     | 1037  | No | NA  | 0 | 1              | Not-determined  | Genome-fragment | NA | 0     |
| S8_extracted_k141_45221     | 1013  | No | NA  | 0 | 1              | Low-quality     | Genome-fragment | NA | 0.66  |
| S17_extracted_k141_47224    | 1960  | No | NA  | 0 | 0              | Not-determined  | Genome-fragment | NA | 0     |
| S17_extracted_k141_69260    | 1154  | No | NA  | 0 | 1              | Not-determined  | Genome-fragment | NA | 0     |
| S17_extracted_k141_135538   | 4846  | No |     |   |                |                 |                 |    |       |



|                              |       |    |    |   |   |                |                 |       |   |
|------------------------------|-------|----|----|---|---|----------------|-----------------|-------|---|
| S17_extracted_k141_7908      | 1014  | No | NA | 3 | 0 | Low-quality    | Genome-fragment | 3.35  | 0 |
| S17_extracted_k141_121274    | 2283  | No | NA | 1 | 2 | Not-determined | Genome-fragment | NA    | 0 |
| S17_extracted_k141_118052    | 1014  | No | NA | 0 | 1 | Low-quality    | Genome-fragment | 0.93  | 0 |
| S17_extracted_k141_12628     | 1223  | No | NA | 0 | 1 | Not-determined | Genome-fragment | NA    | 0 |
| S17_extracted_k141_135608    | 1099  | No | NA | 0 | 2 | Not-determined | Genome-fragment | NA    | 0 |
| S11_vs_k141_230451[full]     | 1014  | No | NA | 1 | 0 | Low-quality    | Genome-fragment | 1.32  | 0 |
| S17_extracted_k141_91289     | 1165  | No | NA | 0 | 0 | Not-determined | Genome-fragment | NA    | 0 |
| S17_extracted_k141_40252     | 2010  | No | NA | 0 | 1 | Not-determined | Genome-fragment | NA    | 0 |
| S11_vs_k141_526121[full]     | 1014  | No | NA | 0 | 0 | Low-quality    | Genome-fragment | 2.25  | 0 |
| S17_extracted_k141_24669     | 1202  | No | NA | 0 | 1 | Not-determined | Genome-fragment | NA    | 0 |
| S13_vs_1123811[full]         | 1014  | No | NA | 1 | 0 | Low-quality    | Genome-fragment | 2.16  | 0 |
| S14_vs_k141_124641[full]     | 1014  | No | NA | 0 | 0 | Low-quality    | Genome-fragment | 1.83  | 0 |
| S17_extracted_k141_61606     | 1373  | No | NA | 0 | 2 | Not-determined | Genome-fragment | NA    | 0 |
| S17_extracted_k141_32660     | 2855  | No | NA | 0 | 1 | Not-determined | Genome-fragment | NA    | 0 |
| S17_extracted_k141_121035    | 1515  | No | NA | 0 | 2 | Not-determined | Genome-fragment | NA    | 0 |
| S1_extracted_k141_70908      | 1014  | No | NA | 0 | 0 | Low-quality    | Genome-fragment | 1.99  | 0 |
| S17_extracted_k141_40279     | 1228  | No | NA | 0 | 0 | Not-determined | Genome-fragment | NA    | 0 |
| S1_vs_k141_528491[102gene]   | 1014  | No | NA | 1 | 0 | Low-quality    | Genome-fragment | 17.19 | 0 |
| S17_extracted_k141_12738     | 3755  | No | NA | 0 | 3 | Not-determined | Genome-fragment | NA    | 0 |
| S5_vs_k141_98664[full]       | 1014  | No | NA | 0 | 1 | Low-quality    | Genome-fragment | 2.48  | 0 |
| S17_extracted_k141_47402     | 1107  | No | NA | 0 | 0 | Not-determined | Genome-fragment | NA    | 0 |
| S17_extracted_k141_37404     | 1052  | No | NA | 0 | 0 | Not-determined | Genome-fragment | NA    | 0 |
| S7_extracted_119169          | 1014  | No | NA | 0 | 1 | Low-quality    | Genome-fragment | 7.27  | 0 |
| S17_extracted_k141_10277     | 3441  | No | NA | 0 | 0 | Not-determined | Genome-fragment | NA    | 0 |
| S16_vs_136002[full]          | 1014  | No | NA | 1 | 0 | Low-quality    | Genome-fragment | 1.97  | 0 |
| S17_extracted_k141_99085     | 2671  | No | NA | 0 | 0 | Not-determined | Genome-fragment | NA    | 0 |
| S17_extracted_k141_135686    | 1500  | No | NA | 0 | 1 | Not-determined | Genome-fragment | NA    | 0 |
| S17_extracted_k141_165257    | 1879  | No | NA | 0 | 1 | Not-determined | Genome-fragment | NA    | 0 |
| S16_vs_1383581[102gene]      | 1014  | No | NA | 0 | 0 | Low-quality    | Genome-fragment | 2.98  | 0 |
| S17_extracted_k141_69460     | 1043  | No | NA | 0 | 0 | Not-determined | Genome-fragment | NA    | 0 |
| S17_extracted_k141_17257     | 1242  | No | NA | 0 | 0 | Not-determined | Genome-fragment | NA    | 0 |
| S17_extracted_k141_10316     | 1125  | No | NA | 0 | 2 | Not-determined | Genome-fragment | NA    | 0 |
| S10_vs_744151[full]          | 1014  | No | NA | 0 | 0 | Low-quality    | Genome-fragment | 1.08  | 0 |
| S17_extracted_k141_69478     | 1293  | No | NA | 0 | 2 | Not-determined | Genome-fragment | NA    | 0 |
| S15_vs_62008[full]           | 1014  | No | NA | 0 | 0 | Low-quality    | Genome-fragment | 2     | 0 |
| S17_extracted_k141_17280     | 4205  | No | NA | 0 | 0 | Not-determined | Genome-fragment | NA    | 0 |
| S17_extracted_k141_61693     | 4137  | No | NA | 0 | 2 | Not-determined | Genome-fragment | NA    | 0 |
| S17_extracted_k141_24776     | 7985  | No | NA | 0 | 1 | Not-determined | Genome-fragment | NA    | 0 |
| S8_extracted_k141_11951      | 1014  | No | NA | 0 | 0 | Low-quality    | Genome-fragment | 2.02  | 0 |
| S17_extracted_k141_47492     | 1358  | No | NA | 0 | 1 | Not-determined | Genome-fragment | NA    | 0 |
| S17_extracted_k141_40343     | 1523  | No | NA | 0 | 2 | Not-determined | Genome-fragment | NA    | 0 |
| S17_extracted_k141_44547     | 1015  | No | NA | 0 | 0 | Low-quality    | Genome-fragment | 1.97  | 0 |
| S17_extracted_k141_10341     | 1409  | No | NA | 0 | 2 | Not-determined | Genome-fragment | NA    | 0 |
| S17_extracted_k141_128147    | 7401  | No | NA | 3 | 0 | High-quality   | Genome-fragment | 100   | 0 |
| S17_extracted_k141_54719     | 1120  | No | NA | 0 | 1 | Not-determined | Genome-fragment | NA    | 0 |
| S17_extracted_k141_108936    | 1177  | No | NA | 0 | 0 | Not-determined | Genome-fragment | NA    | 0 |
| S17_extracted_k141_47545     | 1996  | No | NA | 0 | 1 | Not-determined | Genome-fragment | NA    | 0 |
| S17_extracted_k141_106942    | 1615  | No | NA | 0 | 0 | Not-determined | Genome-fragment | NA    | 0 |
| S9_extracted_k141_70590      | 1015  | No | NA | 0 | 0 | Low-quality    | Genome-fragment | 0.63  | 0 |
| S17_extracted_k141_76763     | 1268  | No | NA | 0 | 1 | Not-determined | Genome-fragment | NA    | 0 |
| S17_extracted_k141_69562     | 2039  | No | NA | 0 | 1 | Not-determined | Genome-fragment | NA    | 0 |
| S9_vs_k141_126712[102gene]   | 1015  | No | NA | 0 | 0 | Low-quality    | Genome-fragment | 2.78  | 0 |
| S17_extracted_k141_32701     | 1122  | No | NA | 0 | 1 | Not-determined | Genome-fragment | NA    | 0 |
| S11_extracted_k141_55902     | 1015  | No | NA | 1 | 0 | Low-quality    | Genome-fragment | 2.25  | 0 |
| S14_extracted_k141_59712     | 1015  | No | NA | 1 | 0 | Low-quality    | Genome-fragment | 0.7   | 0 |
| S14_extracted_k141_67217     | 1015  | No | NA | 0 | 1 | Low-quality    | Genome-fragment | 0.65  | 0 |
| S17_extracted_k141_2831      | 1015  | No | NA | 0 | 1 | Not-determined | Genome-fragment | NA    | 0 |
| S17_extracted_k141_99239     | 6540  | No | NA | 0 | 3 | Not-determined | Genome-fragment | NA    | 0 |
| S17_extracted_k141_10384     | 2525  | No | NA | 0 | 1 | Not-determined | Genome-fragment | NA    | 0 |
| S17_extracted_k141_172666    | 2833  | No | NA | 0 | 1 | Not-determined | Genome-fragment | NA    | 0 |
| S14_vs_k141_585071[full]     | 1015  | No | NA | 3 | 0 | Low-quality    | Genome-fragment | 2.83  | 0 |
| S17_extracted_k141_143621    | 1108  | No | NA | 0 | 0 | Not-determined | Genome-fragment | NA    | 0 |
| S1_vs_k141_560771[full]      | 1015  | No | NA | 0 | 0 | Low-quality    | Genome-fragment | 1.74  | 0 |
| S3_extracted_k141_78412      | 1015  | No | NA | 1 | 0 | Low-quality    | Genome-fragment | 1.52  | 0 |
| S17_extracted_k141_14839     | 3966  | No | NA | 0 | 2 | Not-determined | Genome-fragment | NA    | 0 |
| S3_vs_k141_112461[full]      | 1015  | No | NA | 0 | 0 | Low-quality    | Genome-fragment | 0.59  | 0 |
| S17_extracted_k141_113535    | 7478  | No | NA | 0 | 2 | Not-determined | Genome-fragment | NA    | 0 |
| S17_extracted_k141_135812    | 1045  | No | NA | 0 | 0 | Not-determined | Genome-fragment | NA    | 0 |
| S17_extracted_k141_69627     | 1153  | No | NA | 0 | 0 | Not-determined | Genome-fragment | NA    | 0 |
| S17_extracted_k141_69630     | 1234  | No | NA | 0 | 2 | Not-determined | Genome-fragment | NA    | 0 |
| S5_vs_k141_755641[full]      | 1015  | No | NA | 2 | 0 | Low-quality    | Genome-fragment | 2.64  | 0 |
| S17_extracted_k141_135816    | 3116  | No | NA | 0 | 0 | Not-determined | Genome-fragment | NA    | 0 |
| S17_extracted_k141_165441    | 1006  | No | NA | 0 | 2 | Not-determined | Genome-fragment | NA    | 0 |
| S17_extracted_k141_54836     | 2122  | No | NA | 0 | 0 | Not-determined | Genome-fragment | NA    | 0 |
| S17_extracted_k141_121114    | 3025  | No | NA | 0 | 1 | Not-determined | Genome-fragment | NA    | 0 |
| S17_extracted_69180          | 1015  | No | NA | 0 | 2 | Low-quality    | Genome-fragment | 0.66  | 0 |
| S17_extracted_k141_47622     | 3169  | No | NA | 0 | 2 | Not-determined | Genome-fragment | NA    | 0 |
| S17_extracted_k141_91488     | 1507  | No | NA | 0 | 2 | Not-determined | Genome-fragment | NA    | 0 |
| S10_vs_278741[full]          | 1015  | No | NA | 0 | 0 | Low-quality    | Genome-fragment | 2.06  | 0 |
| S10_vs_607811[full]          | 1015  | No | NA | 1 | 0 | Low-quality    | Genome-fragment | 2.87  | 0 |
| S10_vs_1018491[full]         | 5312  | No | NA | 0 | 3 | Not-determined | Genome-fragment | NA    | 0 |
| S12_vs_k141_803531[full]     | 1015  | No | NA | 0 | 2 | Low-quality    | Genome-fragment | 1.53  | 0 |
| S17_extracted_k141_135834    | 1015  | No | NA | 0 | 0 | Low-quality    | Genome-fragment | 0.72  | 0 |
| S17_extracted_k141_155834    | 4929  | No | NA | 0 | 7 | Not-determined | Genome-fragment | NA    | 0 |
| S17_extracted_k141_91500     | 1152  | No | NA | 0 | 1 | Not-determined | Genome-fragment | NA    | 0 |
| S12_vs_k141_1702461[102gene] | 1015  | No | NA | 1 | 0 | Low-quality    | Genome-fragment | 0.7   | 0 |
| S15_vs_232351[full]          | 1015  | No | NA | 0 | 0 | Low-quality    | Genome-fragment | 2.34  | 0 |
| S17_extracted_k141_121138    | 1016  | No | NA | 0 | 2 | Not-determined | Genome-fragment | NA    | 0 |
| S17_extracted_k141_12005     | 7170  | No | NA | 0 | 3 | Not-determined | Genome-fragment | NA    | 0 |
| S17_extracted_k141_121144    | 1793  | No | NA | 0 | 0 | Not-determined | Genome-fragment | NA    | 0 |
| S17_extracted_k141_143670    | 1060  | No | NA | 0 | 1 | Not-determined | Genome-fragment | NA    | 0 |
| S8_extracted_k141_70980      | 1015  | No | NA | 0 | 0 | Low-quality    | Genome-fragment | 2.86  | 0 |
| S17_extracted_k141_172729    | 3728  | No | NA | 0 | 0 | Not-determined | Genome-fragment | NA    | 0 |
| S17_extracted_k141_135861    | 6935  | No | NA | 0 | 1 | Not-determined | Genome-fragment | NA    | 0 |
| S17_extracted_k141_40500     | 1405  | No | NA | 0 | 0 | Not-determined | Genome-fragment | NA    | 0 |
| S17_extracted_k141_32767     | 3777  | No | NA | 0 | 6 | Not-determined | Genome-fragment | NA    | 0 |
| S17_extracted_k141_24929     | 1085  | No | NA | 0 | 1 | Not-determined | Genome-fragment | NA    | 0 |
| S17_extracted_k141_2939      | 1011  | No | NA | 0 | 0 | Not-determined | Genome-fragment | NA    | 0 |
| S17_extracted_k141_143697    | 1100  | No | NA | 0 | 0 | Not-determined | Genome-fragment | NA    | 0 |
| S8_extracted_k141_202132     | 1015  | No | NA | 0 | 1 | Low-quality    | Genome-fragment | 0.67  | 0 |
| S17_vs_k141_751921[full]     | 1016  | No | NA | 0 | 0 | Low-quality    | Genome-fragment | 1.49  | 0 |
| S17_extracted_k141_17492     | 1161  | No | NA | 0 | 2 | Not-determined | Genome-fragment | NA    | 0 |
| S17_extracted_k141_83608     | 1476  | No | NA | 0 | 1 | Not-determined | Genome-fragment | NA    | 0 |
| S17_extracted_k141_47714     | 1288  | No | NA | 0 | 0 | Not-determined | Genome-fragment | NA    | 0 |
| S17_extracted_k141_40555     | 1994  | No | NA | 0 | 3 | Not-determined | Genome-fragment | NA    | 0 |
| S17_extracted_k141_2962      | 3808  | No | NA | 0 | 0 | Not-determined | Genome-fragment | NA    | 0 |
| S17_extracted_k141_61932     | 1309  | No | NA | 0 | 1 | Not-determined | Genome-fragment | NA    | 0 |
| S17_extracted_k141_151386    | 1260  | No | NA | 0 | 0 | Not-determined | Genome-fragment | NA    | 0 |
| S17_extracted_k141_128379    | 2165  | No | NA | 0 | 2 | Not-determined | Genome-fragment | NA    | 0 |
| S17_extracted_k141_10597     | 3342  | No | NA | 0 | 2 | Not-determined | Genome-fragment | NA    | 0 |
| S17_extracted_k141_47768     | 6459  | No | NA | 0 | 4 | Not-determined | Genome-fragment | NA    | 0 |
| S17_vs_k141_504911[full]     | 1016  | No | NA | 0 | 1 | Low-quality    | Genome-fragment | 2.41  | 0 |
| S17_extracted_k141_128382    | 3376  | No | NA | 0 | 2 | Not-determined | Genome-fragment | NA    | 0 |
| S17_extracted_k141_69667     | 1998  | No | NA | 0 | 0 | Not-determined | Genome-fragment | NA    | 0 |
| S17_extracted_k141_91626     | 1145  | No | NA | 0 | 2 | Not-determined | Genome-fragment | NA    | 0 |
| S17_extracted_k141_113722    | 4181  | No | NA | 0 | 2 | Not-determined | Genome-fragment | NA    | 0 |
| S9_vs_k141_162601[full]      | 1016  | No | NA | 0 | 0 | Low-quality    | Genome-fragment | 0.72  | 0 |
| S17_extracted_k141_3013      | 5275  | No | NA | 0 | 2 | Not-determined | Genome-fragment | NA    | 0 |
| S17_extracted_k141_99451     | 1607  | No | NA | 0 | 0 | Not-determined | Genome-fragment | NA    | 0 |
| S17_extracted_k141_158439    | 1314  | No | NA | 0 | 0 | Not-determined | Genome-fragment | NA    | 0 |
| S17_extracted_k141_128444    | 1122  | No | NA | 0 | 0 | Not-determined | Genome-fragment | NA    | 0 |
| S14_vs_k141_441121[full]     | 1016  | No | NA | 0 | 0 | Low-quality    | Genome-fragment | 1.46  | 0 |
| S17_extracted_k141_121302    | 7557  | No | NA | 0 | 1 | Not-determined | Genome-fragment | NA    | 0 |
| S14_vs_k141_3721[full]       | 1016  | No | NA | 1 | 0 | Low-quality    | Genome-fragment | 0.54  | 0 |
| S17_extracted_k141_55010     | 4476  | No | NA | 0 | 4 | Not-determined | Genome-fragment | NA    | 0 |
| S14_vs_k141_177491[full]     | 1016  | No | NA | 0 | 2 | Low-quality    | Genome-fragment | 1.68  | 0 |
| S17_extracted_k141_69794     | 2184  | No | NA | 0 | 2 | Not-determined | Genome-fragment | NA    | 0 |
| S17_extracted_k141_69801     | 1458  | No | NA | 0 | 2 | Not-determined | Genome-fragment | NA    | 0 |
| S14_vs_k141_461401[102gene]  | 1016  | No | NA | 1 | 0 | Low-quality    | Genome-fragment | 2.51  | 0 |
| S17_extracted_k141_77057     | 15807 | No | NA | 7 | 0 | Medium-quality | Genome-fragment | 52.24 | 0 |
| S17_extracted_k141_32939     | 1427  | No | NA | 0 | 0 | Not-determined | Genome-fragment | NA    | 0 |
| S17_extracted_k141_135978    | 3792  | No | NA | 1 | 0 | Not-determined | Genome-fragment | NA    | 0 |
| S3_extracted_k141_57908      | 1016  | No | NA | 0 | 0 | Low-quality    | Genome-fragment | 1.7   | 0 |
| S17_extracted_k141_128487    | 2506  | No | NA | 0 | 2 | Not-determined | Genome-fragment | NA    | 0 |
| S3_extracted_k141_55518      | 1016  | No | NA | 0 | 0 | Low-quality    | Genome-fragment | 2.15  | 0 |
| S5_extracted_k141_70065      | 1016  | No | NA | 0 | 0 | Low-quality    | Genome-fragment | 1.98  | 0 |
| S17_extracted_k141_107260    | 6587  | No | NA | 0 | 3 | Not-determined | Genome-fragment | NA    | 0 |
| S17_extracted_k141_165659    | 1064  | No | NA | 0 | 1 | Not-determined | Genome-fragment | NA    | 0 |
| S17_extracted_k141_47869     | 1987  | No | NA | 0 | 1 | Not-determined | Genome-fragment | NA    | 0 |
| S5_vs_k141_1037971[full]     | 1016  | No | NA | 0 | 0 | Low-quality    | Genome-fragment | 1.81  | 0 |
| S17_extracted_k141_47870     | 1338  | No | NA | 0 | 2 | Not-determined | Genome-fragment | NA    | 0 |
| S17_extracted_k141_158539    | 3181  | No | NA | 0 | 0 | Not-determined | Genome-fragment | NA    | 0 |
| S17_extracted_k141_10738     | 1024  | No | NA | 0 | 0 | Not-determined | Genome-fragment | NA    | 0 |
| S5_vs_k141_1345531[full]     | 1016  | No | NA | 1 | 0 | Low-quality    |                 |       |   |



|                            |       |    |      |   |   |                |                 |    |      |
|----------------------------|-------|----|------|---|---|----------------|-----------------|----|------|
| S17_extracted_k141_77220   | 1578  | No | NA   | 0 | 1 | Not-determined | Genome-fragment | NA | 0    |
| S17_extracted_k141_73316   | 3477  | No | NA   | 0 | 1 | Not-determined | Genome-fragment | NA | 0    |
| S17_extracted_k141_48012   | 1020  | No | NA   | 0 | 1 | Not-determined | Genome-fragment | NA | 0    |
| S17_extracted_k141_113987  | 5044  | No | NA   | 0 | 2 | Not-determined | Genome-fragment | NA | 0    |
| S17_extracted_k141_165831  | 2474  | No | NA   | 0 | 2 | Not-determined | Genome-fragment | NA | 0    |
| S17_extracted_k141_151537  | 1198  | No | NA   | 0 | 2 | Not-determined | Genome-fragment | NA | 0    |
| S17_extracted_k141_128640  | 2274  | No | NA   | 0 | 0 | Not-determined | Genome-fragment | NA | 0    |
| S17_extracted_k141_55267   | 1105  | No | NA   | 0 | 1 | Not-determined | Genome-fragment | NA | 0    |
| S17_extracted_k141_1215130 | 1345  | No | NA   | 0 | 0 | Not-determined | Genome-fragment | NA | 0    |
| S17_extracted_k141_158699  | 3250  | No | NA   | 0 | 2 | Not-determined | Genome-fragment | NA | 0    |
| S17_extracted_k141_77273   | 1049  | No | NA   | 0 | 1 | Not-determined | Genome-fragment | NA | 0    |
| S10_vs_159121 full         | 1016  | No | NA   | 0 | 0 | Low-quality    | Genome-fragment | NA | 2.08 |
| S17_extracted_k141_136204  | 1779  | No | NA   | 0 | 2 | Not-determined | Genome-fragment | NA | 0    |
| S17_extracted_k141_70028   | 1043  | No | NA   | 0 | 0 | Not-determined | Genome-fragment | NA | 0    |
| S17_extracted_k141_32127   | 1928  | No | NA   | 0 | 0 | Not-determined | Genome-fragment | NA | 0    |
| S17_extracted_k141_5375    | 1412  | No | NA   | 0 | 1 | Not-determined | Genome-fragment | NA | 0    |
| S17_extracted_k141_121563  | 3364  | No | NA   | 0 | 3 | Not-determined | Genome-fragment | NA | 0    |
| S17_extracted_k141_10893   | 1486  | No | NA   | 0 | 1 | Not-determined | Genome-fragment | NA | 0    |
| S17_extracted_k141_3401    | 1451  | No | NA   | 0 | 1 | Not-determined | Genome-fragment | NA | 0    |
| S17_extracted_k141_70076   | 1142  | No | NA   | 0 | 1 | Not-determined | Genome-fragment | NA | 0    |
| S12_vs_k141_173318 full    | 1016  | No | NA   | 0 | 0 | Low-quality    | Genome-fragment | NA | 1.05 |
| S17_extracted_k141_40918   | 5283  | No | NA   | 0 | 1 | Not-determined | Genome-fragment | NA | 0    |
| S17_extracted_k141_33288   | 1062  | No | NA   | 0 | 2 | Not-determined | Genome-fragment | NA | 0    |
| S17_extracted_k141_77323   | 1808  | No | NA   | 0 | 0 | Not-determined | Genome-fragment | NA | 0    |
| S12_vs_k141_115591 full    | 1016  | No | NA   | 0 | 0 | Low-quality    | Genome-fragment | NA | 1.06 |
| S17_extracted_k141_77328   | 1957  | No | NA   | 0 | 0 | Not-determined | Genome-fragment | NA | 0    |
| S17_extracted_k141_173117  | 1128  | No | NA   | 0 | 0 | Not-determined | Genome-fragment | NA | 0    |
| S17_extracted_k141_173126  | 1278  | No | NA   | 0 | 0 | Not-determined | Genome-fragment | NA | 0    |
| S17_extracted_k141_107580  | 1689  | No | NA   | 0 | 0 | Not-determined | Genome-fragment | NA | 0    |
| S17_extracted_k141_151625  | 1600  | No | NA   | 0 | 0 | Not-determined | Genome-fragment | NA | 0    |
| S17_extracted_k141_70139   | 1571  | No | NA   | 0 | 1 | Not-determined | Genome-fragment | NA | 0    |
| S4_extracted_2119          | 1016  | No | NA   | 0 | 0 | Low-quality    | Genome-fragment | NA | 3.34 |
| S17_extracted_k141_84003   | 1570  | No | NA   | 0 | 1 | Not-determined | Genome-fragment | NA | 0    |
| S17_extracted_k141_55390   | 1780  | No | NA   | 0 | 1 | Not-determined | Genome-fragment | NA | 0    |
| S4_extracted_8477          | 1016  | No | NA   | 0 | 1 | Low-quality    | Genome-fragment | NA | 0.42 |
| S17_extracted_k141_173166  | 1176  | No | NA   | 0 | 0 | Not-determined | Genome-fragment | NA | 0    |
| S17_extracted_k141_25328   | 3020  | No | NA   | 0 | 2 | Not-determined | Genome-fragment | NA | 0    |
| S17_extracted_k141_55396   | 16910 | No | NA   | 0 | 4 | Not-determined | Genome-fragment | NA | 0    |
| S17_extracted_k141_158886  | 1008  | No | NA   | 0 | 0 | Not-determined | Genome-fragment | NA | 0    |
| S17_extracted_k141_40991   | 2237  | No | NA   | 0 | 2 | Not-determined | Genome-fragment | NA | 0    |
| S17_extracted_k141_165529  | 1379  | No | NA   | 0 | 1 | Not-determined | Genome-fragment | NA | 0    |
| S17_extracted_k141_52315   | 2959  | No | NA   | 0 | 7 | Not-determined | Genome-fragment | NA | 0    |
| S17_extracted_k141_165933  | 4553  | No | NA   | 0 | 3 | Not-determined | Genome-fragment | NA | 0    |
| S17_extracted_k141_3523    | 1523  | No | NA   | 0 | 0 | Not-determined | Genome-fragment | NA | 0    |
| S17_extracted_k141_23368   | 1125  | No | NA   | 0 | 0 | Not-determined | Genome-fragment | NA | 0    |
| S17_extracted_k141_59845   | 1557  | No | NA   | 0 | 1 | Not-determined | Genome-fragment | NA | 0    |
| S17_extracted_k141_33381   | 1163  | No | NA   | 0 | 1 | Not-determined | Genome-fragment | NA | 0    |
| S4_extracted_19463         | 1016  | No | NA   | 0 | 0 | Low-quality    | Genome-fragment | NA | 2.38 |
| S17_extracted_k141_144117  | 1177  | No | NA   | 0 | 0 | Not-determined | Genome-fragment | NA | 0    |
| S17_extracted_k141_70226   | 1189  | No | NA   | 0 | 1 | Not-determined | Genome-fragment | NA | 0    |
| S17_extracted_k141_84070   | 3578  | No | NA   | 0 | 1 | Not-determined | Genome-fragment | NA | 0    |
| S17_extracted_k141_165554  | 1653  | No | NA   | 0 | 1 | Not-determined | Genome-fragment | NA | 0    |
| S6_extracted_k141_8874     | 1016  | No | NA   | 1 | 0 | Low-quality    | Genome-fragment | NA | 1.72 |
| S8_extracted_k141_132247   | 1016  | No | NA   | 0 | 1 | Low-quality    | Genome-fragment | NA | 1.64 |
| S17_extracted_k141_33381   | 1326  | No | NA   | 0 | 1 | Not-determined | Genome-fragment | NA | 0    |
| S17_extracted_k141_25400   | 4240  | No | NA   | 0 | 0 | Not-determined | Genome-fragment | NA | 0    |
| S17_extracted_k141_107589  | 2012  | No | NA   | 0 | 1 | Not-determined | Genome-fragment | NA | 0    |
| S17_extracted_k141_128878  | 10585 | No | NA   | 0 | 4 | Not-determined | Genome-fragment | NA | 0    |
| S17_extracted_k141_4821    | 2417  | No | NA   | 0 | 0 | Not-determined | Genome-fragment | NA | 0    |
| S8_vs_k141_142926 full     | 1016  | No | NA   | 0 | 0 | Low-quality    | Genome-fragment | NA | 1.61 |
| S17_extracted_k141_84121   | 1087  | No | NA   | 0 | 1 | Not-determined | Genome-fragment | NA | 0    |
| S17_extracted_k141_84124   | 2518  | No | NA   | 0 | 1 | Not-determined | Genome-fragment | NA | 0    |
| S17_extracted_k141_70293   | 1099  | No | NA   | 0 | 0 | Not-determined | Genome-fragment | NA | 0    |
| S17_extracted_k141_121683  | 1161  | No | NA   | 0 | 3 | Not-determined | Genome-fragment | NA | 0    |
| S17_extracted_k141_152383  | 1017  | No | NA   | 0 | 0 | Low-quality    | Genome-fragment | NA | 0.77 |
| S17_extracted_k141_18135   | 1064  | No | NA   | 0 | 0 | Not-determined | Genome-fragment | NA | 0    |
| S17_extracted_k141_33437   | 2938  | No | NA   | 0 | 2 | Not-determined | Genome-fragment | NA | 0    |
| S17_extracted_k141_25455   | 1264  | No | NA   | 0 | 0 | Not-determined | Genome-fragment | NA | 0    |
| S17_extracted_k141_128036  | 3925  | No | NA   | 0 | 0 | Not-determined | Genome-fragment | NA | 0    |
| S17_extracted_k141_173334  | 1384  | No | NA   | 0 | 2 | Not-determined | Genome-fragment | NA | 0    |
| S17_extracted_k141_70310   | 1055  | No | NA   | 0 | 0 | Not-determined | Genome-fragment | NA | 0    |
| S13_vs_146034 full         | 1017  | No | NA   | 0 | 0 | Low-quality    | Genome-fragment | NA | 2.57 |
| S17_extracted_k141_77525   | 1604  | No | NA   | 0 | 3 | Not-determined | Genome-fragment | NA | 0    |
| S17_extracted_k141_77533   | 1114  | No | NA   | 0 | 1 | Not-determined | Genome-fragment | NA | 0    |
| S14_extracted_k141_70717   | 1017  | No | NA   | 0 | 0 | Low-quality    | Genome-fragment | NA | 3.28 |
| S17_extracted_k141_114242  | 1137  | No | NA   | 0 | 1 | Not-determined | Genome-fragment | NA | 0    |
| S17_extracted_k141_33520   | 1424  | No | NA   | 0 | 1 | Not-determined | Genome-fragment | NA | 0    |
| S14_vs_k141_110747 H2gen   | 1017  | No | NA   | 2 | 0 | Low-quality    | Genome-fragment | NA | 3.61 |
| S17_extracted_k141_173369  | 1307  | No | NA   | 0 | 0 | Not-determined | Genome-fragment | NA | 0    |
| S3_extracted_k141_61548    | 1017  | No | NA   | 0 | 0 | Low-quality    | Genome-fragment | NA | 0.16 |
| S3_vs_k141_55024 full      | 1017  | No | NA   | 0 | 0 | Low-quality    | Genome-fragment | NA | 1.94 |
| S7_extracted_5818          | 1017  | No | NA   | 0 | 0 | Low-quality    | Genome-fragment | NA | 2.16 |
| S7_extracted_30681         | 1017  | No | NA   | 1 | 0 | Low-quality    | Genome-fragment | NA | 3.69 |
| S17_extracted_k141_70372   | 1413  | No | NA   | 0 | 2 | Not-determined | Genome-fragment | NA | 0    |
| S17_extracted_k141_129014  | 1414  | No | NA   | 0 | 0 | Not-determined | Genome-fragment | NA | 0    |
| S17_extracted_k141_151843  | 5026  | No | NA   | 0 | 1 | Not-determined | Genome-fragment | NA | 0    |
| S17_extracted_k141_121747  | 3509  | No | NA   | 0 | 2 | Not-determined | Genome-fragment | NA | 0    |
| S17_extracted_k141_52201   | 1297  | No | NA   | 0 | 0 | Not-determined | Genome-fragment | NA | 0    |
| S17_extracted_k141_159105  | 1102  | No | NA   | 0 | 1 | Not-determined | Genome-fragment | NA | 0    |
| S7_vs_114805 full          | 1017  | No | NA   | 0 | 0 | Low-quality    | Genome-fragment | NA | 1.63 |
| S17_extracted_k141_70392   | 2292  | No | NA   | 0 | 2 | Not-determined | Genome-fragment | NA | 0    |
| S17_extracted_k141_33590   | 3767  | No | NA   | 0 | 2 | Not-determined | Genome-fragment | NA | 0    |
| S17_extracted_k141_92217   | 1387  | No | NA   | 0 | 1 | Not-determined | Genome-fragment | NA | 0    |
| S16_extracted_192988       | 1017  | No | NA   | 0 | 0 | Low-quality    | Genome-fragment | NA | 0.62 |
| S17_extracted_k141_1670    | 3561  | No | NA   | 0 | 1 | Not-determined | Genome-fragment | NA | 0    |
| S16_extracted_160631       | 1017  | No | NA   | 0 | 1 | Low-quality    | Genome-fragment | NA | 0.57 |
| S17_extracted_k141_151890  | 2813  | No | NA   | 0 | 1 | Not-determined | Genome-fragment | NA | 0    |
| S16_vs_112201 full         | 1017  | No | NA   | 1 | 0 | Low-quality    | Genome-fragment | NA | 2.48 |
| S17_extracted_k141_144308  | 1249  | No | NA   | 0 | 0 | Not-determined | Genome-fragment | NA | 0    |
| S12_extracted_k141_110294  | 1017  | No | NA   | 0 | 1 | Low-quality    | Genome-fragment | NA | 1.13 |
| S17_extracted_k141_159139  | 2725  | No | NA   | 0 | 2 | Not-determined | Genome-fragment | NA | 0    |
| S17_extracted_k141_151900  | 1403  | No | NA   | 0 | 1 | Not-determined | Genome-fragment | NA | 0    |
| S17_extracted_k141_70425   | 3577  | No | NA   | 0 | 2 | Not-determined | Genome-fragment | NA | 0    |
| S17_extracted_k141_144326  | 2585  | No | NA   | 0 | 1 | Not-determined | Genome-fragment | NA | 0    |
| S17_extracted_k141_155617  | 3882  | No | NA   | 0 | 1 | Not-determined | Genome-fragment | NA | 0    |
| S17_extracted_k141_33629   | 3467  | No | NA   | 0 | 3 | Not-determined | Genome-fragment | NA | 0    |
| S8_vs_k141_174691 full     | 1017  | No | NA   | 0 | 0 | Low-quality    | Genome-fragment | NA | 1.69 |
| S17_extracted_k141_159152  | 3688  | No | NA   | 0 | 2 | Not-determined | Genome-fragment | NA | 0    |
| S17_extracted_k141_121777  | 7909  | No | NA   | 0 | 1 | Not-determined | Genome-fragment | NA | 0    |
| S17_extracted_k141_18303   | 2121  | No | NA   | 0 | 1 | Not-determined | Genome-fragment | NA | 0    |
| S17_extracted_k141_15628   | 1373  | No | NA   | 0 | 1 | Not-determined | Genome-fragment | NA | 0    |
| S17_extracted_k141_41187   | 1815  | No | NA   | 0 | 2 | Not-determined | Genome-fragment | NA | 0    |
| S17_vs_k141_8319 full      | 1018  | No | NA   | 0 | 1 | Low-quality    | Genome-fragment | NA | 0.64 |
| S17_extracted_k141_151919  | 5444  | No | NA   | 0 | 1 | Not-determined | Genome-fragment | NA | 0    |
| S17_extracted_k141_159155  | 1775  | No | NA   | 0 | 1 | Not-determined | Genome-fragment | NA | 0    |
| S17_extracted_k141_70499   | 1300  | No | NA   | 0 | 1 | Not-determined | Genome-fragment | NA | 0    |
| S17_extracted_k141_55675   | 1477  | No | NA   | 0 | 1 | Not-determined | Genome-fragment | NA | 0    |
| S17_extracted_k141_76679   | 4591  | No | NA   | 0 | 3 | Not-determined | Genome-fragment | NA | 0    |
| S17_extracted_k141_41246   | 1024  | No | NA   | 0 | 0 | Not-determined | Genome-fragment | NA | 0    |
| S17_extracted_k141_151972  | 1597  | No | NA   | 0 | 2 | Not-determined | Genome-fragment | NA | 0    |
| S17_extracted_k141_41255   | 1256  | No | NA   | 0 | 1 | Not-determined | Genome-fragment | NA | 0    |
| S17_extracted_k141_151974  | 3863  | No | NA   | 0 | 0 | Not-determined | Genome-fragment | NA | 0    |
| S17_extracted_k141_166185  | 2188  | No | NA   | 0 | 0 | Not-determined | Genome-fragment | NA | 0    |
| S9_vs_k141_172301 full     | 1018  | No | NA   | 0 | 3 | Low-quality    | Genome-fragment | NA | 1.79 |
| S9_vs_k141_42901 H2gen     | 1018  | No | NA   | 0 | 0 | Low-quality    | Genome-fragment | NA | 3.05 |
| S17_extracted_k141_114499  | 1191  | No | NA   | 0 | 1 | Not-determined | Genome-fragment | NA | 0    |
| S17_extracted_k141_18388   | 1764  | No | NA   | 0 | 3 | Not-determined | Genome-fragment | NA | 0    |
| S12_vs_94563 full          | 1018  | No | NA   | 0 | 0 | Low-quality    | Genome-fragment | NA | 1.75 |
| S17_extracted_k141_70504   | 4613  | No | NA   | 0 | 3 | Not-determined | Genome-fragment | NA | 0    |
| S17_extracted_k141_41272   | 1562  | No | NA   | 0 | 1 | Not-determined | Genome-fragment | NA | 0    |
| S14_extracted_k141_22997   | 1018  | No | NA   | 0 | 1 | Low-quality    | Genome-fragment | NA | 0.5  |
| S17_extracted_k141_159180  | 1500  | No | NA   | 0 | 1 | Not-determined | Genome-fragment | NA | 0    |
| S17_extracted_k141_121844  | 1196  | No | NA   | 0 | 0 | Not-determined | Genome-fragment | NA | 0    |
| S17_extracted_k141_100049  | 6778  | No | NA   | 0 | 3 | Not-determined | Genome-fragment | NA | 0    |
| S17_extracted_k141_114505  | 16352 | No | NA   | 0 | 6 | Not-determined | Genome-fragment | NA | 0    |
| S17_extracted_k141_18413   | 1010  | No | NA   | 0 | 0 | Not-determined | Genome-fragment | NA | 0    |
| S17_extracted_k141_55722   | 1582  | No | NA   | 0 | 2 | Not-determined | Genome-fragment | NA | 0    |
| S17_extracted_k141_114515  | 1429  | No | NA   | 0 | 0 | Not-determined | Genome-fragment | NA | 0    |
| S17_extracted_k141_84286   | 3873  | No | NA   | 0 | 5 | Not-determined | Genome-fragment | NA | 0    |
| S17_extracted_k141_84294   | 1664  | No | NA   | 0 | 0 | Not-determined | Genome-fragment | NA | 0    |
| S14_vs_k141_55241 H2gen    | 1018  | No | NA   | 1 | 0 | Low-quality    | Genome-fragment | NA | 3.35 |
| S17_extracted_k141_152017  | 2283  | No | NA   | 0 | 2 | Not-determined | Genome-fragment | NA | 0    |
| S1_vs_k141_56108 full      | 1018  | No | NA   | 1 | 0 | Low-quality    | Genome-fragment | NA | 1.35 |
| S17_extracted_k141_84311   | 1334  | No | NA   | 0 | 1 | Not-determined | Genome-fragment | NA | 0    |
| S17_extracted_k141_33780   | 1803  | No | NA</ |   |   |                |                 |    |      |



|                           |       |    |    |    |   |                |                 |       |   |
|---------------------------|-------|----|----|----|---|----------------|-----------------|-------|---|
| S17_extracted_k141_129375 | 3356  | No | NA | 0  | 1 | Not-determined | Genome-fragment | NA    | 0 |
| S17_extracted_k141_14443  | 1805  | No | NA | 0  | 0 | Not-determined | Genome-fragment | NA    | 0 |
| S17_extracted_k141_70616  | 2902  | No | NA | 0  | 2 | Not-determined | Genome-fragment | NA    | 0 |
| S8_vs_k141_62050  full    | 1018  | No | NA | 0  | 0 | Low-quality    | Genome-fragment | 0.65  | 0 |
| S17_extracted_k141_70626  | 1014  | No | NA | 0  | 0 | Not-determined | Genome-fragment | NA    | 0 |
| S17_extracted_k141_11341  | 2920  | No | NA | 0  | 0 | Not-determined | Genome-fragment | NA    | 0 |
| S17_extracted_k141_121990 | 3078  | No | NA | 0  | 3 | Not-determined | Genome-fragment | NA    | 0 |
| S17_extracted_k141_121993 | 1674  | No | NA | 0  | 0 | Not-determined | Genome-fragment | NA    | 0 |
| S17_extracted_k141_107974 | 1214  | No | NA | 0  | 1 | Not-determined | Genome-fragment | NA    | 0 |
| S17_vs_k141_154886  full  | 1019  | No | NA | 0  | 0 | Low-quality    | Genome-fragment | 2.1   | 0 |
| S17_extracted_k141_70670  | 3458  | No | NA | 0  | 3 | Not-determined | Genome-fragment | NA    | 0 |
| S17_extracted_k141_108003 | 1027  | No | NA | 0  | 1 | Not-determined | Genome-fragment | NA    | 0 |
| S17_extracted_k141_41478  | 1185  | No | NA | 0  | 0 | Not-determined | Genome-fragment | NA    | 0 |
| S17_extracted_k141_114748 | 2158  | No | NA | 0  | 0 | Not-determined | Genome-fragment | NA    | 0 |
| S17_extracted_k141_122046 | 1397  | No | NA | 0  | 0 | Not-determined | Genome-fragment | NA    | 0 |
| S17_extracted_k141_128448 | 2705  | No | NA | 0  | 2 | Not-determined | Genome-fragment | NA    | 0 |
| S17_extracted_k141_48660  | 1613  | No | NA | 0  | 2 | Not-determined | Genome-fragment | NA    | 0 |
| S9_extracted_k141_16829   | 1019  | No | NA | 1  | 0 | Low-quality    | Genome-fragment | 2.3   | 0 |
| S17_extracted_k141_84664  | 1017  | No | NA | 0  | 1 | Not-determined | Genome-fragment | NA    | 0 |
| S17_extracted_k141_108045 | 4890  | No | NA | 0  | 3 | Not-determined | Genome-fragment | NA    | 0 |
| S17_extracted_k141_166462 | 1002  | No | NA | 0  | 2 | Not-determined | Genome-fragment | NA    | 0 |
| S17_extracted_k141_23976  | 1508  | No | NA | 0  | 1 | Not-determined | Genome-fragment | NA    | 0 |
| S17_extracted_k141_152240 | 1699  | No | NA | 0  | 0 | Not-determined | Genome-fragment | NA    | 0 |
| S17_extracted_k141_159350 | 1825  | No | NA | 0  | 0 | Not-determined | Genome-fragment | NA    | 0 |
| S9_extracted_k141_63960   | 1019  | No | NA | 0  | 0 | Low-quality    | Genome-fragment | 1.8   | 0 |
| S17_extracted_k141_84484  | 5641  | No | NA | 0  | 2 | Not-determined | Genome-fragment | NA    | 0 |
| S17_extracted_k141_48696  | 5706  | No | NA | 0  | 1 | Not-determined | Genome-fragment | NA    | 0 |
| S9_vs_k141_60422  full    | 1019  | No | NA | 0  | 0 | Low-quality    | Genome-fragment | 0.48  | 0 |
| S11_vs_k141_2474  full    | 1019  | No | NA | 0  | 0 | Low-quality    | Genome-fragment | 1.71  | 0 |
| S17_extracted_k141_78031  | 1090  | No | NA | 0  | 0 | Not-determined | Genome-fragment | NA    | 0 |
| S17_extracted_k141_41565  | 8027  | No | NA | 0  | 4 | Not-determined | Genome-fragment | NA    | 0 |
| S17_extracted_k141_5598   | 1136  | No | NA | 0  | 0 | Not-determined | Genome-fragment | NA    | 0 |
| S17_extracted_k141_78033  | 1408  | No | NA | 0  | 1 | Not-determined | Genome-fragment | NA    | 0 |
| S17_extracted_k141_48744  | 1153  | No | NA | 0  | 0 | Not-determined | Genome-fragment | NA    | 0 |
| S11_vs_k141_65707  2gene  | 1019  | No | NA | 0  | 0 | Low-quality    | Genome-fragment | 2.1   | 0 |
| S17_extracted_k141_9257   | 1241  | No | NA | 0  | 1 | Not-determined | Genome-fragment | NA    | 0 |
| S13_vs_92484  full        | 1019  | No | NA | 0  | 2 | Low-quality    | Genome-fragment | 0.74  | 0 |
| S17_extracted_k141_11431  | 1077  | No | NA | 0  | 0 | Not-determined | Genome-fragment | NA    | 0 |
| S14_extracted_k141_25193  | 1019  | No | NA | 0  | 0 | Low-quality    | Genome-fragment | 2.64  | 0 |
| S14_vs_k141_31919  full   | 1019  | No | NA | 1  | 0 | Low-quality    | Genome-fragment | 0.63  | 0 |
| S17_extracted_k141_18702  | 2776  | No | NA | 0  | 0 | Not-determined | Genome-fragment | NA    | 0 |
| S17_extracted_k141_56062  | 1157  | No | NA | 0  | 0 | Not-determined | Genome-fragment | NA    | 0 |
| S1_vs_k141_93429  full    | 1019  | No | NA | 1  | 0 | Low-quality    | Genome-fragment | 2.05  | 0 |
| S17_extracted_k141_114940 | 1190  | No | NA | 0  | 1 | Not-determined | Genome-fragment | NA    | 0 |
| S17_extracted_k141_108191 | 4006  | No | NA | 0  | 3 | Not-determined | Genome-fragment | NA    | 0 |
| S17_extracted_k141_25818  | 2345  | No | NA | 0  | 0 | Not-determined | Genome-fragment | NA    | 0 |
| S17_extracted_k141_152385 | 4905  | No | NA | 0  | 0 | Not-determined | Genome-fragment | NA    | 0 |
| S17_extracted_k141_108205 | 1197  | No | NA | 0  | 0 | Not-determined | Genome-fragment | NA    | 0 |
| S17_extracted_k141_11455  | 1066  | No | NA | 0  | 0 | Not-determined | Genome-fragment | NA    | 0 |
| S17_extracted_k141_41661  | 1053  | No | NA | 0  | 0 | Not-determined | Genome-fragment | NA    | 0 |
| S17_extracted_k141_129614 | 1176  | No | NA | 0  | 1 | Not-determined | Genome-fragment | NA    | 0 |
| S2_extracted_k141_96842   | 1019  | No | NA | 0  | 0 | Low-quality    | Genome-fragment | 2.39  | 0 |
| S17_extracted_k141_136915 | 1843  | No | NA | 1  | 0 | Not-determined | Genome-fragment | NA    | 0 |
| S17_extracted_k141_78175  | 1066  | No | NA | 0  | 0 | Not-determined | Genome-fragment | NA    | 0 |
| S17_extracted_k141_84550  | 4227  | No | NA | 0  | 2 | Not-determined | Genome-fragment | NA    | 0 |
| S17_extracted_k141_100418 | 7107  | No | NA | 0  | 0 | Not-determined | Genome-fragment | NA    | 0 |
| S17_extracted_k141_84594  | 2347  | No | NA | 0  | 0 | Not-determined | Genome-fragment | NA    | 0 |
| S2_vs_k141_97574  full    | 1019  | No | NA | 1  | 0 | Low-quality    | Genome-fragment | 1.89  | 0 |
| S17_extracted_k141_165109 | 1564  | No | NA | 0  | 1 | Not-determined | Genome-fragment | NA    | 0 |
| S17_extracted_k141_166613 | 3350  | No | NA | 0  | 2 | Not-determined | Genome-fragment | NA    | 0 |
| S17_extracted_k141_56119  | 3163  | No | NA | 0  | 3 | Not-determined | Genome-fragment | NA    | 0 |
| S17_extracted_k141_100447 | 4151  | No | NA | 0  | 2 | Not-determined | Genome-fragment | NA    | 0 |
| S17_extracted_k141_11506  | 1517  | No | NA | 0  | 1 | Not-determined | Genome-fragment | NA    | 0 |
| S5_vs_k141_136639  full   | 1019  | No | NA | 0  | 0 | Low-quality    | Genome-fragment | 1.48  | 0 |
| S17_extracted_k141_92738  | 1217  | No | NA | 0  | 2 | Not-determined | Genome-fragment | NA    | 0 |
| S17_extracted_k141_115036 | 5012  | No | NA | 0  | 0 | Not-determined | Genome-fragment | NA    | 0 |
| S17_extracted_k141_136954 | 3960  | No | NA | 0  | 3 | Not-determined | Genome-fragment | NA    | 0 |
| S17_extracted_k141_159511 | 5767  | No | NA | 0  | 1 | Not-determined | Genome-fragment | NA    | 0 |
| S17_extracted_k141_11567  | 1008  | No | NA | 0  | 1 | Not-determined | Genome-fragment | NA    | 0 |
| S17_extracted_k141_34173  | 3326  | No | NA | 0  | 2 | Not-determined | Genome-fragment | NA    | 0 |
| S5_vs_k141_65532  full    | 1019  | No | NA | 0  | 2 | Low-quality    | Genome-fragment | 0.77  | 0 |
| S17_extracted_k141_4110   | 1280  | No | NA | 0  | 1 | Not-determined | Genome-fragment | NA    | 0 |
| S17_extracted_k141_136971 | 1659  | No | NA | 0  | 1 | Not-determined | Genome-fragment | NA    | 0 |
| S17_extracted_k141_115062 | 1140  | No | NA | 0  | 3 | Not-determined | Genome-fragment | NA    | 0 |
| S17_extracted_k141_173835 | 1146  | No | NA | 0  | 0 | Not-determined | Genome-fragment | NA    | 0 |
| S17_extracted_106978      | 1019  | No | NA | 1  | 0 | Low-quality    | Genome-fragment | 4.65  | 0 |
| S17_extracted_121645      | 1019  | No | NA | 0  | 0 | Low-quality    | Genome-fragment | 2.34  | 0 |
| S17_extracted_k141_166693 | 4304  | No | NA | 0  | 0 | Not-determined | Genome-fragment | NA    | 0 |
| S17_extracted_k141_78293  | 4700  | No | NA | 0  | 2 | Not-determined | Genome-fragment | NA    | 0 |
| S17_extracted_k141_129722 | 1301  | No | NA | 0  | 0 | Not-determined | Genome-fragment | NA    | 0 |
| S17_extracted_k141_122195 | 1664  | No | NA | 0  | 0 | Not-determined | Genome-fragment | NA    | 0 |
| S17_extracted_k141_173861 | 1914  | No | NA | 0  | 1 | Not-determined | Genome-fragment | NA    | 0 |
| S17_extracted_k141_137026 | 1078  | No | NA | 0  | 1 | Not-determined | Genome-fragment | NA    | 0 |
| S17_extracted_k141_84714  | 1308  | No | NA | 0  | 0 | Not-determined | Genome-fragment | NA    | 0 |
| S7_vs_98038  full         | 1019  | No | NA | 0  | 0 | Low-quality    | Genome-fragment | 1.84  | 0 |
| S17_extracted_k141_159570 | 3278  | No | NA | 0  | 1 | Not-determined | Genome-fragment | NA    | 0 |
| S17_extracted_k141_108432 | 1642  | No | NA | 0  | 1 | Not-determined | Genome-fragment | NA    | 0 |
| S17_extracted_k141_108435 | 1050  | No | NA | 0  | 1 | Not-determined | Genome-fragment | NA    | 0 |
| S17_extracted_k141_159583 | 1645  | No | NA | 0  | 1 | Not-determined | Genome-fragment | NA    | 0 |
| S7_vs_121638  full        | 1019  | No | NA | 1  | 0 | Low-quality    | Genome-fragment | 1.72  | 0 |
| S17_extracted_k141_62564  | 1472  | No | NA | 0  | 1 | Not-determined | Genome-fragment | NA    | 0 |
| S16_vs_13851  full        | 1019  | No | NA | 0  | 0 | Low-quality    | Genome-fragment | 2.83  | 0 |
| S17_extracted_k141_159598 | 1222  | No | NA | 0  | 0 | Not-determined | Genome-fragment | NA    | 0 |
| S17_extracted_k141_152617 | 2026  | No | NA | 0  | 3 | Not-determined | Genome-fragment | NA    | 0 |
| S17_extracted_k141_122240 | 1226  | No | NA | 0  | 1 | Not-determined | Genome-fragment | NA    | 0 |
| S17_extracted_k141_144763 | 6846  | No | NA | 0  | 1 | Not-determined | Genome-fragment | NA    | 0 |
| S16_vs_63209  full        | 1019  | No | NA | 0  | 0 | Low-quality    | Genome-fragment | 2.25  | 0 |
| S17_extracted_k141_144770 | 1203  | No | NA | 0  | 1 | Not-determined | Genome-fragment | NA    | 0 |
| S17_extracted_k141_108480 | 5645  | No | NA | 0  | 1 | Not-determined | Genome-fragment | NA    | 0 |
| S17_extracted_k141_56341  | 1041  | No | NA | 0  | 0 | Not-determined | Genome-fragment | NA    | 0 |
| S16_vs_R1517  full        | 1019  | No | NA | 1  | 0 | Low-quality    | Genome-fragment | 2.71  | 0 |
| S17_extracted_k141_173941 | 1861  | No | NA | 0  | 2 | Not-determined | Genome-fragment | NA    | 0 |
| S17_extracted_k141_159635 | 1181  | No | NA | 0  | 1 | Not-determined | Genome-fragment | NA    | 0 |
| S16_vs_130520  2gene      | 1019  | No | NA | 2  | 0 | Low-quality    | Genome-fragment | 2.94  | 0 |
| S17_extracted_k141_129831 | 1222  | No | NA | 0  | 1 | Not-determined | Genome-fragment | NA    | 0 |
| S17_extracted_k141_144787 | 4528  | No | NA | 0  | 0 | Not-determined | Genome-fragment | NA    | 0 |
| S17_extracted_k141_84809  | 11189 | No | NA | 0  | 7 | Not-determined | Genome-fragment | NA    | 0 |
| S17_extracted_k141_41892  | 1123  | No | NA | 0  | 1 | Not-determined | Genome-fragment | NA    | 0 |
| S17_extracted_k141_166828 | 1806  | No | NA | 0  | 2 | Not-determined | Genome-fragment | NA    | 0 |
| S17_extracted_k141_100641 | 1167  | No | NA | 0  | 0 | Not-determined | Genome-fragment | NA    | 0 |
| S10_vs_R9019  2gene       | 1019  | No | NA | 1  | 0 | Low-quality    | Genome-fragment | 2.45  | 0 |
| S17_extracted_k141_128875 | 1017  | No | NA | 0  | 0 | Not-determined | Genome-fragment | NA    | 0 |
| S17_extracted_k141_26098  | 2415  | No | NA | 0  | 0 | Not-determined | Genome-fragment | NA    | 0 |
| S17_extracted_k141_174012 | 1002  | No | NA | 0  | 0 | Not-determined | Genome-fragment | NA    | 0 |
| S17_extracted_k141_91883  | 4649  | No | NA | 0  | 1 | Not-determined | Genome-fragment | NA    | 0 |
| S17_extracted_k141_100683 | 1081  | No | NA | 0  | 0 | Not-determined | Genome-fragment | NA    | 0 |
| S17_extracted_k141_49151  | 1283  | No | NA | 0  | 1 | Not-determined | Genome-fragment | NA    | 0 |
| S12_vs_k141_79674  full   | 1019  | No | NA | 1  | 0 | Low-quality    | Genome-fragment | 0.55  | 0 |
| S17_extracted_k141_49168  | 1315  | No | NA | 0  | 1 | Not-determined | Genome-fragment | NA    | 0 |
| S17_extracted_k141_41950  | 1423  | No | NA | 0  | 2 | Not-determined | Genome-fragment | NA    | 0 |
| S17_extracted_k141_52956  | 1118  | No | NA | 0  | 2 | Not-determined | Genome-fragment | NA    | 0 |
| S17_extracted_k141_52921  | 1845  | No | NA | 0  | 1 | Not-determined | Genome-fragment | NA    | 0 |
| S17_extracted_k141_144851 | 1082  | No | NA | 0  | 0 | Not-determined | Genome-fragment | NA    | 0 |
| S17_extracted_k141_52929  | 1516  | No | NA | 0  | 1 | Not-determined | Genome-fragment | NA    | 0 |
| S17_extracted_k141_78454  | 1673  | No | NA | 0  | 0 | Not-determined | Genome-fragment | NA    | 0 |
| S17_extracted_k141_102405 | 1020  | No | NA | 0  | 0 | Low-quality    | Genome-fragment | 2.85  | 0 |
| S17_extracted_k141_137198 | 3205  | No | NA | 0  | 2 | Not-determined | Genome-fragment | NA    | 0 |
| S17_extracted_k141_36283  | 1020  | No | NA | 0  | 0 | Not-determined | Genome-fragment | NA    | 0 |
| S17_extracted_k141_78468  | 6906  | No | NA | 0  | 0 | Not-determined | Genome-fragment | NA    | 0 |
| S11_extracted_k141_57199  | 1020  | No | NA | 0  | 0 | Low-quality    | Genome-fragment | 1.91  | 0 |
| S17_extracted_k141_62763  | 1014  | No | NA | 0  | 2 | Not-determined | Genome-fragment | NA    | 0 |
| S17_extracted_k141_4347   | 10420 | No | NA | 1  | 0 | Not-determined | Genome-fragment | NA    | 0 |
| S11_vs_k141_92472  full   | 1020  | No | NA | 0  | 0 | Low-quality    | Genome-fragment | 2.43  | 0 |
| S17_extracted_k141_84922  | 1028  | No | NA | 0  | 1 | Not-determined | Genome-fragment | NA    | 0 |
| S1_vs_k141_147161  full   | 1020  | No | NA | 1  | 0 | Low-quality    | Genome-fragment | 2.64  | 0 |
| S5_extracted_k141_105375  | 1020  | No | NA | 0  | 0 | Low-quality    | Genome-fragment | 0.92  | 0 |
| S17_extracted_k141_84939  | 1083  | No | NA | 0  | 1 | Not-determined | Genome-fragment | NA    | 0 |
| S17_extracted_k141_174033 | 64565 | No | NA | 16 | 1 | Medium-quality | Genome-fragment | 59.33 | 0 |
| S17_extracted_k141_84947  | 1227  | No | NA | 0  | 0 | Not-determined | Genome-fragment | NA    | 0 |
| S17_extracted_k141_115377 | 1087  | No | NA | 0  | 1 | Not-determined | Genome-fragment | NA    | 0 |
| S17_extracted_k141_42054  | 2528  | No | NA | 0  | 2 | Not-determined | Genome-fragment | NA    | 0 |
| S17_extracted_k141_84962  | 1055  | No | NA | 0  | 1 | Not-determined | Genome-fragment | NA    | 0 |
| S17_extracted_k141_144952 | 1774  | No | NA | 0  | 1 | Not-determined | Genome-fragment | NA    | 0 |
| S17_extracted_k141_108584 | 1212  | No | NA | 0  | 1 | Not-determined | Genome-fragment | NA    | 0 |
| S17_extracted_k141_144966 |       |    |    |    |   |                |                 |       |   |



|                            |       |    |    |    |   |                |                 |    |       |
|----------------------------|-------|----|----|----|---|----------------|-----------------|----|-------|
| S17_extracted_k141_174179  | 1840  | No | NA | 0  | 0 | Not-determined | Genome-fragment | NA | 0     |
| S17_extracted_k141_17328   | 1367  | No | NA | 0  | 0 | Not-determined | Genome-fragment | NA | 0     |
| S1_extracted_k141_17220    | 1021  | No | NA | 0  | 0 | Low-quality    | Genome-fragment | NA | 0.68  |
| S17_extracted_k141_78638   | 4491  | No | NA | 0  | 5 | Not-determined | Genome-fragment | NA | 0     |
| S1_extracted_k141_99067    | 1021  | No | NA | 2  | 0 | Low-quality    | Genome-fragment | NA | 3.37  |
| S17_extracted_k141_159953  | 1236  | No | NA | 0  | 0 | Not-determined | Genome-fragment | NA | 0     |
| S17_extracted_k141_78648   | 1478  | No | NA | 0  | 1 | Not-determined | Genome-fragment | NA | 0     |
| S17_extracted_k141_145085  | 3503  | No | NA | 0  | 6 | Not-determined | Genome-fragment | NA | 0     |
| S17_extracted_k141_78653   | 1258  | No | NA | 0  | 1 | Not-determined | Genome-fragment | NA | 0     |
| S1_vs_k141_100352  full    | 1021  | No | NA | 0  | 0 | Low-quality    | Genome-fragment | NA | 1.75  |
| S17_extracted_k141_167125  | 20847 | No | NA | 0  | 6 | Not-determined | Genome-fragment | NA | 0     |
| S2_vs_k141_12295  full     | 1021  | No | NA | 0  | 0 | Low-quality    | Genome-fragment | NA | 2.32  |
| S17_extracted_k141_56713   | 1143  | No | NA | 1  | 0 | Not-determined | Genome-fragment | NA | 0     |
| S17_extracted_k141_167138  | 3494  | No | NA | 0  | 0 | Not-determined | Genome-fragment | NA | 0     |
| S5_vs_k141_17784  full     | 1021  | No | NA | 1  | 0 | Low-quality    | Genome-fragment | NA | 1.32  |
| S17_extracted_k141_83124   | 2507  | No | NA | 0  | 2 | Not-determined | Genome-fragment | NA | 0     |
| S5_vs_k141_81888  full     | 1021  | No | NA | 0  | 0 | Low-quality    | Genome-fragment | NA | 2.44  |
| S17_extracted_k141_4530    | 1228  | No | NA | 0  | 2 | Not-determined | Genome-fragment | NA | 0     |
| S7_extracted_56854         | 1021  | No | NA | 0  | 0 | Low-quality    | Genome-fragment | NA | 0.73  |
| S17_extracted_k141_56733   | 4393  | No | NA | 0  | 3 | Not-determined | Genome-fragment | NA | 0     |
| S17_extracted_k141_115604  | 1214  | No | NA | 0  | 1 | Not-determined | Genome-fragment | NA | 0     |
| S17_extracted_k141_71384   | 1506  | No | NA | 0  | 1 | Not-determined | Genome-fragment | NA | 0     |
| S16_extracted_69330        | 1021  | No | NA | 0  | 1 | Low-quality    | Genome-fragment | NA | 0.51  |
| S17_extracted_k141_115634  | 1395  | No | NA | 0  | 1 | Not-determined | Genome-fragment | NA | 0     |
| S17_extracted_k141_63000   | 2200  | No | NA | 0  | 2 | Not-determined | Genome-fragment | NA | 0     |
| S17_extracted_k141_69467   | 2073  | No | NA | 0  | 4 | Not-determined | Genome-fragment | NA | 0     |
| S17_extracted_k141_174203  | 15880 | No | NA | 7  | 0 | Medium-quality | Genome-fragment | NA | 69.95 |
| S17_extracted_k141_145112  | 1021  | No | NA | 0  | 1 | Not-determined | Genome-fragment | NA | 0     |
| S17_extracted_k141_153017  | 1014  | No | NA | 0  | 0 | Not-determined | Genome-fragment | NA | 0     |
| S17_extracted_k141_167206  | 7256  | No | NA | 0  | 3 | Not-determined | Genome-fragment | NA | 0     |
| S17_extracted_k141_145129  | 2119  | No | NA | 0  | 1 | Not-determined | Genome-fragment | NA | 0     |
| S17_extracted_k141_167210  | 1062  | No | NA | 0  | 1 | Not-determined | Genome-fragment | NA | 0     |
| S17_extracted_k141_63035   | 1222  | No | NA | 0  | 1 | Not-determined | Genome-fragment | NA | 0     |
| S17_extracted_k141_155998  | 1036  | No | NA | 0  | 1 | Not-determined | Genome-fragment | NA | 0     |
| S17_extracted_k141_59214   | 1054  | No | NA | 0  | 0 | Not-determined | Genome-fragment | NA | 0     |
| S17_extracted_k141_167232  | 3451  | No | NA | 0  | 1 | Not-determined | Genome-fragment | NA | 0     |
| S10_vs_87292  full         | 1021  | No | NA | 1  | 0 | Low-quality    | Genome-fragment | NA | 1.89  |
| S17_extracted_k141_17472   | 1671  | No | NA | 0  | 1 | Not-determined | Genome-fragment | NA | 0     |
| S17_extracted_k141_153085  | 1018  | No | NA | 0  | 1 | Not-determined | Genome-fragment | NA | 0     |
| S12_extracted_k141_61873   | 1021  | No | NA | 1  | 0 | Low-quality    | Genome-fragment | NA | 0.92  |
| S12_vs_k141_102461  full   | 1021  | No | NA | 0  | 0 | Low-quality    | Genome-fragment | NA | 1.44  |
| S17_extracted_k141_12066   | 1214  | No | NA | 0  | 1 | Not-determined | Genome-fragment | NA | 0     |
| S17_extracted_k141_160051  | 1014  | No | NA | 0  | 1 | Not-determined | Genome-fragment | NA | 0     |
| S17_extracted_k141_93236   | 1885  | No | NA | 0  | 2 | Not-determined | Genome-fragment | NA | 0     |
| S17_extracted_k141_74892   | 2668  | No | NA | 0  | 2 | Not-determined | Genome-fragment | NA | 0     |
| S17_extracted_k141_53217   | 1075  | No | NA | 0  | 1 | Not-determined | Genome-fragment | NA | 0     |
| S12_vs_k141_40143  full    | 1021  | No | NA | 1  | 0 | Low-quality    | Genome-fragment | NA | 1.24  |
| S17_extracted_k141_34757   | 1185  | No | NA | 0  | 0 | Not-determined | Genome-fragment | NA | 0     |
| S17_extracted_k141_71513   | 1041  | No | NA | 0  | 1 | Not-determined | Genome-fragment | NA | 0     |
| S17_extracted_k141_120862  | 1696  | No | NA | 0  | 1 | Not-determined | Genome-fragment | NA | 0     |
| S17_extracted_k141_63094   | 1415  | No | NA | 0  | 0 | Not-determined | Genome-fragment | NA | 0     |
| S17_extracted_k141_101086  | 1216  | No | NA | 0  | 1 | Not-determined | Genome-fragment | NA | 0     |
| S17_extracted_k141_122498  | 3120  | No | NA | 0  | 3 | Not-determined | Genome-fragment | NA | 0     |
| S17_extracted_k141_42349   | 9842  | No | NA | 0  | 1 | Not-determined | Genome-fragment | NA | 0     |
| S17_extracted_k141_56815   | 1049  | No | NA | 0  | 1 | Not-determined | Genome-fragment | NA | 0     |
| S17_extracted_k141_4688    | 1770  | No | NA | 0  | 1 | Not-determined | Genome-fragment | NA | 0     |
| S12_vs_k141_68619  full    | 1021  | No | NA | 0  | 1 | Low-quality    | Genome-fragment | NA | 0.46  |
| S17_extracted_k141_160077  | 3092  | No | NA | 0  | 2 | Not-determined | Genome-fragment | NA | 0     |
| S17_extracted_k141_174309  | 1809  | No | NA | 0  | 0 | Not-determined | Genome-fragment | NA | 0     |
| S15_vs_71291  full         | 1021  | No | NA | 0  | 0 | Low-quality    | Genome-fragment | NA | 2.26  |
| S17_extracted_k141_115757  | 1197  | No | NA | 0  | 1 | Not-determined | Genome-fragment | NA | 0     |
| S17_extracted_k141_160092  | 1277  | No | NA | 0  | 4 | Not-determined | Genome-fragment | NA | 0     |
| S17_extracted_k141_115761  | 3590  | No | NA | 0  | 2 | Not-determined | Genome-fragment | NA | 0     |
| S8_extracted_k141_127009   | 1021  | No | NA | 1  | 0 | Low-quality    | Genome-fragment | NA | 1.99  |
| S17_extracted_k141_145234  | 1206  | No | NA | 0  | 0 | Not-determined | Genome-fragment | NA | 0     |
| S17_extracted_k141_108849  | 5439  | No | NA | 0  | 4 | Not-determined | Genome-fragment | NA | 0     |
| S8_extracted_k141_199463   | 1021  | No | NA | 0  | 0 | Low-quality    | Genome-fragment | NA | 1.75  |
| S17_extracted_k141_4730    | 4117  | No | NA | 0  | 0 | Not-determined | Genome-fragment | NA | 0     |
| S17_extracted_k141_108869  | 3207  | No | NA | 0  | 2 | Not-determined | Genome-fragment | NA | 0     |
| S8_vs_k141_113446  full    | 1021  | No | NA | 0  | 0 | Low-quality    | Genome-fragment | NA | 2.24  |
| S9_vs_k141_168576  H2gene  | 1022  | No | NA | 1  | 0 | Low-quality    | Genome-fragment | NA | 2.23  |
| S11_extracted_k141_93304   | 1012  | No | NA | 0  | 1 | Low-quality    | Genome-fragment | NA | 1.48  |
| S17_extracted_k141_93304   | 2823  | No | NA | 0  | 2 | Not-determined | Genome-fragment | NA | 0     |
| S17_extracted_k141_115794  | 1160  | No | NA | 0  | 1 | Not-determined | Genome-fragment | NA | 0     |
| S17_extracted_k141_1407    | 1143  | No | NA | 0  | 1 | Not-determined | Genome-fragment | NA | 0     |
| S17_extracted_k141_145278  | 1382  | No | NA | 0  | 0 | Not-determined | Genome-fragment | NA | 0     |
| S17_extracted_k141_63152   | 1037  | No | NA | 0  | 2 | Not-determined | Genome-fragment | NA | 0     |
| S17_extracted_k141_85313   | 2121  | No | NA | 0  | 0 | Not-determined | Genome-fragment | NA | 0     |
| S17_extracted_k141_42411   | 1404  | No | NA | 0  | 0 | Not-determined | Genome-fragment | NA | 0     |
| S17_extracted_k141_160126  | 5830  | No | NA | 0  | 2 | Not-determined | Genome-fragment | NA | 0     |
| S17_extracted_k141_1607    | 1067  | No | NA | 0  | 0 | Not-determined | Genome-fragment | NA | 0     |
| S17_extracted_k141_4809    | 1236  | No | NA | 0  | 1 | Not-determined | Genome-fragment | NA | 0     |
| S11_extracted_k141_41572   | 1022  | No | NA | 1  | 0 | Low-quality    | Genome-fragment | NA | 2.58  |
| S17_extracted_k141_93360   | 1168  | No | NA | 0  | 0 | Not-determined | Genome-fragment | NA | 0     |
| S17_extracted_k141_4817    | 4757  | No | NA | 0  | 1 | Not-determined | Genome-fragment | NA | 0     |
| S11_extracted_k141_29503   | 1022  | No | NA | 0  | 0 | Low-quality    | Genome-fragment | NA | 0.81  |
| S17_extracted_k141_108948  | 3059  | No | NA | 0  | 1 | Not-determined | Genome-fragment | NA | 0     |
| S17_extracted_k141_160167  | 2228  | No | NA | 0  | 1 | Not-determined | Genome-fragment | NA | 0     |
| S11_extracted_k141_36088   | 1022  | No | NA | 0  | 0 | Low-quality    | Genome-fragment | NA | 2.73  |
| S17_extracted_k141_78886   | 3179  | No | NA | 0  | 2 | Not-determined | Genome-fragment | NA | 0     |
| S17_extracted_k141_153269  | 1305  | No | NA | 0  | 1 | Not-determined | Genome-fragment | NA | 0     |
| S17_extracted_k141_108976  | 2629  | No | NA | 0  | 0 | Not-determined | Genome-fragment | NA | 0     |
| S17_extracted_k141_130155  | 1992  | No | NA | 0  | 0 | Not-determined | Genome-fragment | NA | 0     |
| S17_extracted_k141_78914   | 1858  | No | NA | 0  | 0 | Not-determined | Genome-fragment | NA | 0     |
| S17_extracted_k141_34993   | 6009  | No | NA | 0  | 2 | Not-determined | Genome-fragment | NA | 0     |
| S17_extracted_k141_160234  | 1538  | No | NA | 0  | 1 | Not-determined | Genome-fragment | NA | 0     |
| S17_extracted_k141_137848  | 1016  | No | NA | 0  | 0 | Not-determined | Genome-fragment | NA | 0     |
| S17_extracted_k141_13984   | 1529  | No | NA | 0  | 0 | Not-determined | Genome-fragment | NA | 0     |
| S17_extracted_k141_78922   | 1067  | No | NA | 0  | 1 | Not-determined | Genome-fragment | NA | 0     |
| S11_vs_k141_102647  H2gene | 1022  | No | NA | 1  | 0 | Low-quality    | Genome-fragment | NA | 2.22  |
| S17_extracted_k141_130193  | 1088  | No | NA | 0  | 2 | Not-determined | Genome-fragment | NA | 0.78  |
| S13_extracted_131631       | 1022  | No | NA | 0  | 1 | Low-quality    | Genome-fragment | NA | 2.36  |
| S17_extracted_k141_101225  | 3195  | No | NA | 0  | 2 | Not-determined | Genome-fragment | NA | 0     |
| S17_extracted_k141_65442   | 3639  | No | NA | 0  | 2 | Not-determined | Genome-fragment | NA | 0     |
| S17_extracted_k141_153103  | 1283  | No | NA | 0  | 1 | Not-determined | Genome-fragment | NA | 0     |
| S17_extracted_k141_63314   | 2685  | No | NA | 0  | 1 | Not-determined | Genome-fragment | NA | 0     |
| S17_extracted_k141_122731  | 1137  | No | NA | 0  | 0 | Not-determined | Genome-fragment | NA | 0     |
| S17_extracted_k141_71693   | 1130  | No | NA | 0  | 1 | Not-determined | Genome-fragment | NA | 2.15  |
| S3_extracted_k141_4778     | 1022  | No | NA | 0  | 0 | Low-quality    | Genome-fragment | NA | 3.01  |
| S3_extracted_k141_83648    | 1022  | No | NA | 1  | 0 | Low-quality    | Genome-fragment | NA | 0     |
| S17_extracted_k141_71704   | 1548  | No | NA | 0  | 0 | Not-determined | Genome-fragment | NA | 0     |
| S17_extracted_k141_15077   | 2807  | No | NA | 0  | 1 | Not-determined | Genome-fragment | NA | 0     |
| S17_extracted_k141_130222  | 1566  | No | NA | 0  | 1 | Not-determined | Genome-fragment | NA | 0     |
| S17_extracted_k141_78988   | 2027  | No | NA | 0  | 2 | Not-determined | Genome-fragment | NA | 0     |
| S17_extracted_k141_7171    | 1235  | No | NA | 0  | 2 | Not-determined | Genome-fragment | NA | 0     |
| S17_extracted_k141_12207   | 1466  | No | NA | 0  | 1 | Not-determined | Genome-fragment | NA | 0     |
| S17_extracted_k141_167495  | 1175  | No | NA | 0  | 1 | Not-determined | Genome-fragment | NA | 0     |
| S17_extracted_k141_174608  | 3448  | No | NA | 0  | 0 | Not-determined | Genome-fragment | NA | 0     |
| S17_extracted_k141_36560   | 1197  | No | NA | 0  | 0 | Not-determined | Genome-fragment | NA | 0     |
| S17_extracted_k141_153361  | 1177  | No | NA | 0  | 1 | Not-determined | Genome-fragment | NA | 0     |
| S17_extracted_k141_4977    | 1502  | No | NA | 0  | 1 | Not-determined | Genome-fragment | NA | 0     |
| S17_extracted_k141_122793  | 1670  | No | NA | 0  | 1 | Not-determined | Genome-fragment | NA | 0     |
| S17_extracted_k141_93510   | 2056  | No | NA | 0  | 2 | Not-determined | Genome-fragment | NA | 0     |
| S17_extracted_k141_19459   | 2664  | No | NA | 0  | 2 | Not-determined | Genome-fragment | NA | 0     |
| S17_extracted_k141_145430  | 1276  | No | NA | 0  | 1 | Not-determined | Genome-fragment | NA | 0     |
| S17_extracted_k141_19468   | 3328  | No | NA | 0  | 1 | Not-determined | Genome-fragment | NA | 0     |
| S17_extracted_k141_26597   | 2445  | No | NA | 0  | 1 | Not-determined | Genome-fragment | NA | 0     |
| S17_extracted_k141_160321  | 1367  | No | NA | 0  | 0 | Not-determined | Genome-fragment | NA | 0     |
| S3_vs_k141_54124  full     | 1022  | No | NA | 0  | 0 | Low-quality    | Genome-fragment | NA | 2.58  |
| S7_vs_55100  H2gene        | 1022  | No | NA | 1  | 0 | Low-quality    | Genome-fragment | NA | 0.78  |
| S17_extracted_k141_145513  | 1236  | No | NA | 0  | 0 | Not-determined | Genome-fragment | NA | 1.35  |
| S7_vs_127549  H2gene       | 1022  | No | NA | 1  | 0 | Low-quality    | Genome-fragment | NA | 0     |
| S17_extracted_k141_71821   | 2293  | No | NA | 0  | 1 | Not-determined | Genome-fragment | NA | 3.11  |
| S16_extracted_36899        | 1022  | No | NA | 1  | 0 | Low-quality    | Genome-fragment | NA | 0     |
| S17_extracted_k141_5049    | 1014  | No | NA | 0  | 1 | Not-determined | Genome-fragment | NA | 73.5  |
| S17_extracted_k141_35138   | 52045 | No | NA | 12 | 4 | Medium-quality | Genome-fragment | NA | 0     |
| S17_extracted_k141_153455  | 1235  | No | NA | 0  | 0 | Not-determined | Genome-fragment | NA | 0     |
| S17_extracted_k141_109121  | 4422  | No | NA | 0  | 4 | Not-determined | Genome-fragment | NA | 0     |
| S17_extracted_k141_63391   | 1656  | No | NA | 0  | 1 | Not-determined | Genome-fragment | NA | 0     |
| S17_extracted_k141_85587   | 1183  | No | NA | 0  | 1 | Not-determined | Genome-fragment | NA | 0     |
| S17_extracted_k141_42638   | 2759  | No | NA | 0  | 0 | Not-determined | Genome-fragment | NA | 0     |
| S17_extracted_k141_116099  | 1453  | No | NA | 0  | 2 | Not-determined | Genome-fragment | NA | 0     |
| S17_extracted_k141_137987  | 1541  | No | NA | 0  | 1 | Not-determined | Genome-fragment | NA | 0     |
| S17_extracted_k141_116102  | 1777  | No | NA | 0  | 1 | Not-determined | Genome-fragment | NA | 0     |
| S17_extracted_k141_71      |       |    |    |    |   |                |                 |    |       |



|                            |       |    |   |   |                |                 |       |   |
|----------------------------|-------|----|---|---|----------------|-----------------|-------|---|
| S17_vs_k141_321551 full    | 1023  | NA | 0 | 0 | Low-quality    | Genome-fragment | 2.21  | 0 |
| S17_vs_k141_55098 full     | 1023  | NA | 0 | 0 | Low-quality    | Genome-fragment | 0.69  | 0 |
| S13_extracted_10615        | 1023  | NA | 0 | 1 | Low-quality    | Genome-fragment | 1.04  | 0 |
| S17_extracted_k141_49919   | 3868  | NA | 0 | 1 | Not-determined | Genome-fragment | NA    | 0 |
| S17_extracted_k141_35372   | 1253  | NA | 0 | 0 | Not-determined | Genome-fragment | NA    | 0 |
| S1_extracted_k141_66855    | 1023  | NA | 0 | 0 | Low-quality    | Genome-fragment | 2.81  | 0 |
| S17_extracted_k141_138125  | 4655  | NA | 0 | 2 | Not-determined | Genome-fragment | NA    | 0 |
| S17_extracted_k141_145631  | 2065  | NA | 0 | 1 | Not-determined | Genome-fragment | NA    | 0 |
| S17_extracted_k141_138133  | 2809  | NA | 0 | 1 | Not-determined | Genome-fragment | NA    | 0 |
| S17_extracted_k141_35398   | 1267  | NA | 0 | 1 | Not-determined | Genome-fragment | NA    | 0 |
| S17_extracted_k141_145639  | 1451  | NA | 0 | 0 | Not-determined | Genome-fragment | NA    | 0 |
| S1_vs_k141_472311 full     | 1023  | NA | 0 | 0 | Low-quality    | Genome-fragment | 1.96  | 0 |
| S1_vs_k141_135196 full     | 1023  | NA | 1 | 0 | Low-quality    | Genome-fragment | 2.59  | 0 |
| S17_extracted_k141_42808   | 6582  | NA | 0 | 4 | Not-determined | Genome-fragment | NA    | 0 |
| S17_extracted_k141_123074  | 1268  | NA | 0 | 1 | Not-determined | Genome-fragment | NA    | 0 |
| S17_extracted_k141_1242    | 1508  | NA | 0 | 2 | Not-determined | Genome-fragment | NA    | 0 |
| S17_extracted_k141_174610  | 1951  | NA | 0 | 1 | Not-determined | Genome-fragment | NA    | 0 |
| S17_extracted_k141_167758  | 6353  | NA | 0 | 0 | Not-determined | Genome-fragment | NA    | 0 |
| S17_extracted_k141_1704    | 1159  | NA | 0 | 1 | Not-determined | Genome-fragment | NA    | 0 |
| S17_extracted_k141_160567  | 1018  | NA | 0 | 1 | Not-determined | Genome-fragment | NA    | 0 |
| S17_extracted_k141_101527  | 1264  | NA | 0 | 0 | Not-determined | Genome-fragment | NA    | 0 |
| S17_extracted_k141_19710   | 1957  | NA | 0 | 2 | Not-determined | Genome-fragment | NA    | 0 |
| S17_extracted_k141_123096  | 4945  | NA | 0 | 1 | Not-determined | Genome-fragment | NA    | 0 |
| S1_vs_k141_57091 lit2gene  | 1023  | NA | 2 | 0 | Low-quality    | Genome-fragment | 1.89  | 0 |
| S17_extracted_k141_138181  | 1385  | NA | 0 | 0 | Not-determined | Genome-fragment | NA    | 0 |
| S17_extracted_k141_101547  | 1258  | NA | 0 | 2 | Not-determined | Genome-fragment | NA    | 0 |
| S3_vs_k141_14819 lit2gene  | 1023  | NA | 1 | 0 | Low-quality    | Genome-fragment | 2.16  | 0 |
| S17_extracted_k141_160587  | 3122  | NA | 0 | 3 | Not-determined | Genome-fragment | NA    | 0 |
| S17_extracted_k141_167794  | 1695  | NA | 0 | 1 | Not-determined | Genome-fragment | NA    | 0 |
| S7_extracted_97000         | 1023  | NA | 0 | 0 | Low-quality    | Genome-fragment | 2.32  | 0 |
| S17_extracted_k141_79300   | 1417  | NA | 0 | 2 | Not-determined | Genome-fragment | NA    | 0 |
| S17_extracted_k141_85874   | 1211  | NA | 0 | 1 | Not-determined | Genome-fragment | NA    | 0 |
| S17_extracted_k141_12520   | 1462  | NA | 0 | 1 | Not-determined | Genome-fragment | NA    | 0 |
| S17_extracted_k141_116382  | 1032  | NA | 0 | 1 | Not-determined | Genome-fragment | NA    | 0 |
| S17_extracted_k141_85887   | 1234  | NA | 0 | 2 | Not-determined | Genome-fragment | NA    | 0 |
| S17_extracted_k141_130553  | 1237  | NA | 0 | 2 | Not-determined | Genome-fragment | NA    | 0 |
| S7_extracted_132721        | 1023  | NA | 0 | 0 | Low-quality    | Genome-fragment | 0.67  | 0 |
| S17_extracted_k141_16778   | 2884  | NA | 0 | 1 | Not-determined | Genome-fragment | NA    | 0 |
| S17_extracted_k141_145709  | 1221  | NA | 0 | 1 | Not-determined | Genome-fragment | NA    | 0 |
| S17_extracted_k141_50088   | 1163  | NA | 0 | 2 | Not-determined | Genome-fragment | NA    | 0 |
| S16_extracted_10527        | 1023  | NA | 0 | 1 | Low-quality    | Genome-fragment | 1.19  | 0 |
| S16_extracted_93305        | 1023  | NA | 0 | 0 | Low-quality    | Genome-fragment | 1.58  | 0 |
| S17_extracted_k141_109495  | 1059  | NA | 0 | 0 | Not-determined | Genome-fragment | NA    | 0 |
| S17_extracted_k141_174696  | 4708  | NA | 0 | 5 | Not-determined | Genome-fragment | NA    | 0 |
| S17_extracted_k141_79535   | 2385  | NA | 0 | 2 | Not-determined | Genome-fragment | NA    | 0 |
| S17_extracted_k141_83760   | 1281  | NA | 0 | 2 | Not-determined | Genome-fragment | NA    | 0 |
| S17_extracted_k141_101626  | 2231  | NA | 0 | 2 | Not-determined | Genome-fragment | NA    | 0 |
| S17_extracted_k141_12557   | 4083  | NA | 0 | 4 | Not-determined | Genome-fragment | NA    | 0 |
| S17_extracted_k141_79368   | 3369  | NA | 0 | 0 | Not-determined | Genome-fragment | NA    | 0 |
| S16_vs_126196 full         | 1023  | NA | 2 | 0 | Low-quality    | Genome-fragment | 2.55  | 0 |
| S17_extracted_k141_123173  | 4266  | NA | 0 | 4 | Not-determined | Genome-fragment | NA    | 0 |
| S17_extracted_k141_101649  | 2629  | NA | 0 | 0 | Not-determined | Genome-fragment | NA    | 0 |
| S17_extracted_k141_174712  | 1184  | NA | 0 | 0 | Not-determined | Genome-fragment | NA    | 0 |
| S17_extracted_k141_109530  | 1139  | NA | 0 | 2 | Not-determined | Genome-fragment | NA    | 0 |
| S6_vs_k141_126265 lit2gene | 1023  | NA | 1 | 0 | Low-quality    | Genome-fragment | 16.77 | 0 |
| S17_extracted_k141_85840   | 1061  | NA | 0 | 1 | Not-determined | Genome-fragment | NA    | 0 |
| S17_extracted_k141_50147   | 1503  | NA | 0 | 2 | Not-determined | Genome-fragment | NA    | 0 |
| S17_extracted_k141_83781   | 3917  | NA | 0 | 0 | Not-determined | Genome-fragment | NA    | 0 |
| S17_extracted_k141_123210  | 2743  | NA | 0 | 0 | Not-determined | Genome-fragment | NA    | 0 |
| S17_extracted_k141_123211  | 3243  | NA | 0 | 1 | Not-determined | Genome-fragment | NA    | 0 |
| S8_vs_k141_85083 full      | 1023  | NA | 0 | 0 | Low-quality    | Genome-fragment | 1.47  | 0 |
| S17_extracted_k141_85498   | 1109  | NA | 0 | 1 | Not-determined | Genome-fragment | NA    | 0 |
| S17_extracted_k141_145807  | 1046  | NA | 0 | 1 | Not-determined | Genome-fragment | NA    | 0 |
| S17_extracted_k141_160715  | 1964  | NA | 0 | 4 | Not-determined | Genome-fragment | NA    | 0 |
| S17_extracted_k141_83881   | 1035  | NA | 0 | 0 | Not-determined | Genome-fragment | NA    | 0 |
| S17_extracted_k141_123237  | 3814  | NA | 0 | 2 | Not-determined | Genome-fragment | NA    | 0 |
| S17_extracted_k141_145831  | 2348  | NA | 0 | 0 | Not-determined | Genome-fragment | NA    | 0 |
| S17_extracted_k141_93838   | 1244  | NA | 0 | 1 | Not-determined | Genome-fragment | NA    | 0 |
| S17_extracted_k141_93848   | 1525  | NA | 0 | 0 | Not-determined | Genome-fragment | NA    | 0 |
| S17_extracted_k141_116509  | 1519  | NA | 0 | 1 | Not-determined | Genome-fragment | NA    | 0 |
| S17_extracted_k141_174787  | 1201  | NA | 0 | 1 | Not-determined | Genome-fragment | NA    | 0 |
| S17_extracted_k141_167953  | 3701  | NA | 0 | 0 | Not-determined | Genome-fragment | NA    | 0 |
| S17_extracted_k141_93869   | 1126  | NA | 0 | 0 | Not-determined | Genome-fragment | NA    | 0 |
| S17_extracted_k141_35569   | 1508  | NA | 0 | 1 | Not-determined | Genome-fragment | NA    | 0 |
| S17_extracted_k141_50241   | 1260  | NA | 0 | 0 | Not-determined | Genome-fragment | NA    | 0 |
| S17_extracted_k141_122641  | 1024  | NA | 0 | 1 | Low-quality    | Genome-fragment | 0.18  | 0 |
| S17_extracted_k141_72176   | 2648  | NA | 0 | 0 | Not-determined | Genome-fragment | NA    | 0 |
| S17_extracted_k141_116566  | 1109  | NA | 0 | 1 | Not-determined | Genome-fragment | NA    | 0 |
| S17_extracted_k141_160798  | 1024  | NA | 0 | 1 | Not-determined | Genome-fragment | NA    | 0 |
| S17_extracted_k141_123311  | 2840  | NA | 0 | 1 | Not-determined | Genome-fragment | NA    | 0 |
| S17_extracted_k141_138322  | 5763  | NA | 0 | 0 | Not-determined | Genome-fragment | NA    | 0 |
| S17_extracted_k141_116583  | 4446  | NA | 0 | 0 | Not-determined | Genome-fragment | NA    | 0 |
| S17_extracted_k141_5550    | 14093 | NA | 0 | 5 | Not-determined | Genome-fragment | NA    | 0 |
| S17_extracted_k141_101824  | 4054  | NA | 0 | 2 | Not-determined | Genome-fragment | NA    | 0 |
| S17_extracted_k141_168020  | 5103  | NA | 0 | 2 | Not-determined | Genome-fragment | NA    | 0 |
| S17_extracted_k141_35629   | 1272  | NA | 0 | 1 | Not-determined | Genome-fragment | NA    | 0 |
| S17_extracted_k141_145924  | 1256  | NA | 0 | 2 | Not-determined | Genome-fragment | NA    | 0 |
| S17_extracted_k141_83845   | 1702  | NA | 0 | 2 | Not-determined | Genome-fragment | NA    | 0 |
| S17_vs_k141_79108 lit2gene | 1024  | NA | 0 | 0 | Low-quality    | Genome-fragment | 2.2   | 0 |
| S17_extracted_k141_93932   | 3892  | NA | 0 | 4 | Not-determined | Genome-fragment | NA    | 0 |
| S17_extracted_k141_83850   | 3560  | NA | 0 | 1 | Not-determined | Genome-fragment | NA    | 0 |
| S17_extracted_k141_109722  | 1606  | NA | 0 | 3 | Not-determined | Genome-fragment | NA    | 0 |
| S9_extracted_k141_58529    | 1024  | NA | 0 | 0 | Low-quality    | Genome-fragment | 1.86  | 0 |
| S11_vs_k141_72045 full     | 1024  | NA | 0 | 1 | Low-quality    | Genome-fragment | 1.31  | 0 |
| S17_extracted_k141_153861  | 1266  | NA | 0 | 0 | Not-determined | Genome-fragment | NA    | 0 |
| S17_extracted_k141_109750  | 1174  | NA | 0 | 1 | Not-determined | Genome-fragment | NA    | 0 |
| S17_extracted_k141_109758  | 1773  | NA | 0 | 1 | Not-determined | Genome-fragment | NA    | 0 |
| S17_extracted_k141_174871  | 1032  | NA | 0 | 1 | Not-determined | Genome-fragment | NA    | 0 |
| S17_extracted_k141_10314   | 4996  | NA | 0 | 0 | Not-determined | Genome-fragment | NA    | 0 |
| S17_extracted_k141_79551   | 1307  | NA | 0 | 0 | Not-determined | Genome-fragment | NA    | 0 |
| S17_extracted_k141_26952   | 1403  | NA | 0 | 0 | Not-determined | Genome-fragment | NA    | 0 |
| S17_extracted_k141_15800   | 1312  | NA | 0 | 0 | Not-determined | Genome-fragment | NA    | 0 |
| S17_extracted_k141_43116   | 1198  | NA | 0 | 1 | Not-determined | Genome-fragment | NA    | 0 |
| S17_extracted_k141_101899  | 5103  | NA | 0 | 1 | Not-determined | Genome-fragment | NA    | 0 |
| S17_extracted_k141_109789  | 1626  | NA | 0 | 1 | Not-determined | Genome-fragment | NA    | 0 |
| S17_extracted_k141_109809  | 1180  | NA | 0 | 1 | Not-determined | Genome-fragment | NA    | 0 |
| S17_extracted_k141_101935  | 1853  | NA | 0 | 0 | Not-determined | Genome-fragment | NA    | 0 |
| S17_extracted_k141_109820  | 2827  | NA | 0 | 2 | Not-determined | Genome-fragment | NA    | 0 |
| S14_extracted_k141_45701   | 1024  | NA | 0 | 0 | Low-quality    | Genome-fragment | 2.65  | 0 |
| S14_extracted_k141_46220   | 1024  | NA | 4 | 0 | Low-quality    | Genome-fragment | 3.33  | 0 |
| S17_extracted_k141_12742   | 7424  | NA | 0 | 3 | Not-determined | Genome-fragment | NA    | 0 |
| S17_extracted_k141_109870  | 1558  | NA | 0 | 2 | Not-determined | Genome-fragment | NA    | 0 |
| S1_extracted_k141_150258   | 1024  | NA | 0 | 0 | Low-quality    | Genome-fragment | 1.59  | 0 |
| S17_extracted_k141_5674    | 1513  | NA | 0 | 2 | Not-determined | Genome-fragment | NA    | 0 |
| S17_extracted_k141_146046  | 1590  | NA | 0 | 0 | Not-determined | Genome-fragment | NA    | 0 |
| S5_extracted_k141_129437   | 1024  | NA | 1 | 0 | Low-quality    | Genome-fragment | 2.24  | 0 |
| S17_extracted_k141_146058  | 2209  | NA | 0 | 1 | Not-determined | Genome-fragment | NA    | 0 |
| S17_extracted_k141_50442   | 1438  | NA | 0 | 2 | Not-determined | Genome-fragment | NA    | 0 |
| S17_extracted_k141_5700    | 3286  | NA | 0 | 1 | Not-determined | Genome-fragment | NA    | 0 |
| S17_extracted_k141_79672   | 1052  | NA | 0 | 0 | Not-determined | Genome-fragment | NA    | 0 |
| S17_extracted_k141_5705    | 1013  | NA | 0 | 0 | Not-determined | Genome-fragment | NA    | 0 |
| S17_extracted_k141_168415  | 1217  | NA | 0 | 2 | Not-determined | Genome-fragment | NA    | 0 |
| S17_extracted_k141_130763  | 1475  | NA | 0 | 1 | Not-determined | Genome-fragment | NA    | 0 |
| S17_extracted_k141_109923  | 1050  | NA | 0 | 3 | Not-determined | Genome-fragment | NA    | 0 |
| S5_extracted_k141_98821    | 1024  | NA | 0 | 0 | Low-quality    | Genome-fragment | 2.51  | 0 |
| S17_extracted_k141_116791  | 2644  | NA | 0 | 0 | Not-determined | Genome-fragment | NA    | 0 |
| S17_extracted_k141_161084  | 1053  | NA | 0 | 0 | Not-determined | Genome-fragment | NA    | 0 |
| S5_extracted_k141_36907    | 1024  | NA | 0 | 0 | Low-quality    | Genome-fragment | 3.03  | 0 |
| S17_extracted_k141_27137   | 1560  | NA | 0 | 0 | Not-determined | Genome-fragment | NA    | 0 |
| S17_extracted_k141_116812  | 1082  | NA | 0 | 1 | Not-determined | Genome-fragment | NA    | 0 |
| S16_extracted_106038       | 1024  | NA | 0 | 2 | Low-quality    | Genome-fragment | 0.86  | 0 |
| S10_vs_10839 full          | 1024  | NA | 0 | 1 | Low-quality    | Genome-fragment | 2.73  | 0 |
| S17_extracted_k141_19933   | 2256  | NA | 0 | 1 | Not-determined | Genome-fragment | NA    | 0 |
| S10_vs_43001 full          | 1024  | NA | 0 | 0 | Low-quality    | Genome-fragment | 2.49  | 0 |
| S17_extracted_k141_154045  | 1043  | NA | 0 | 0 | Not-determined | Genome-fragment | NA    | 0 |
| S17_extracted_k141_146135  | 3232  | NA | 0 | 0 | Not-determined | Genome-fragment | NA    | 0 |
| S12_vs_k141_178351 full    | 1024  | NA | 0 | 1 | Low-quality    | Genome-fragment | 1.79  | 0 |
| S17_extracted_k141_144032  | 3053  | NA | 0 | 0 | Not-determined | Genome-fragment | NA    | 0 |
| S15_extracted_68588        | 1024  | NA | 0 | 0 | Low-quality    | Genome-fragment | 1.71  | 0 |
| S17_extracted_k141_35899   | 1014  | NA | 0 | 1 | Not-determined | Genome-fragment | NA    | 0 |
| S17_extracted_k141_42384   | 1037  | NA | 0 | 0 | Not-determined | Genome-fragment | NA    | 0 |
| S17_extracted_k141_1287    | 1825  | NA | 0 | 1 | Not-determined | Genome-fragment | NA    | 0 |
| S9_vs_k141_4173 full       | 1025  | NA | 1 | 0 | Low-quality    | Genome-fragment | 2.07  | 0 |
| S17_extracted_k141_15964   | 1177  | NA | 0 | 0 | Not-determined | Genome-fragment | NA    | 0 |
| S17_extracted_k141_54035   | 1100  | NA | 0 | 0 | Not-determined | Genome-fragment | NA    | 0 |
| S17_extracted_k141_5787    | 2546  | NA | 0 | 1 | Not-determined | Genome-fragment | NA    | 0 |
| S17_extracted_k141_123589  | 2127  | NA | 0 | 0 | Not-determined | Genome-fragment | NA    | 0 |
| S17_extracted_k141_50547   | 4522  | NA | 0 | 0 | Not-determined | Genome-fragment | NA    | 0 |
| S17_extracted_k141_138584  | 2142  | NA | 0 | 0 | Not-determined | Genome-fragment | NA    | 0 |
| S17_extracted_k141_72472   | 3888  | NA | 0 | 0 | Not-determined | Genome-fragment | NA    | 0 |
| S17_extracted_k141_54062   | 1143  | NA | 0 | 0 | Not-determined | Genome-fragment | NA    | 0 |
| S17_extracted_k141_94069   | 3895  | NA | 0 | 2 | Not-determined | Genome-fragment | NA    | 0 |
| S17_extracted_k141_50562   | 3183  | NA | 0 | 2 | Not-determined | Genome-fragment | NA    | 0 |
| S15_extracted_84529        |       |    |   |   |                |                 |       |   |



|                            |      |    |    |   |   |                |                 |    |      |
|----------------------------|------|----|----|---|---|----------------|-----------------|----|------|
| S17_extracted_k141_154263  | 1352 | No | NA | 0 | 2 | Not-determined | Genome-fragment | NA | 0    |
| S17_extracted_k141_175063  | 1411 | No | NA | 0 | 0 | Not-determined | Genome-fragment | NA | 0    |
| S17_extracted_k141_168275  | 1022 | No | NA | 0 | 0 | Not-determined | Genome-fragment | NA | 0    |
| S17_extracted_k141_168286  | 1557 | No | NA | 0 | 0 | Not-determined | Genome-fragment | NA | 0    |
| S17_extracted_k141_175085  | 1030 | No | NA | 0 | 1 | Not-determined | Genome-fragment | NA | 0    |
| S17_extracted_k141_168397  | 2763 | No | NA | 0 | 1 | Not-determined | Genome-fragment | NA | 0    |
| S17_extracted_k141_57844   | 1068 | No | NA | 0 | 0 | Not-determined | Genome-fragment | NA | 0    |
| S14_vs_k141_163886   H2gme | 1025 | No | NA | 1 | 0 | Low-quality    | Genome-fragment | NA | 1.81 |
| S1_vs_k141_11498   full    | 1025 | No | NA | 0 | 0 | Low-quality    | Genome-fragment | NA | 1.94 |
| S17_extracted_k141_72564   | 1935 | No | NA | 0 | 3 | Not-determined | Genome-fragment | NA | 0    |
| S17_extracted_k141_36051   | 1411 | No | NA | 0 | 2 | Not-determined | Genome-fragment | NA | 0    |
| S17_extracted_k141_72586   | 1436 | No | NA | 0 | 0 | Not-determined | Genome-fragment | NA | 0    |
| S17_extracted_k141_138782  | 1144 | No | NA | 0 | 0 | Not-determined | Genome-fragment | NA | 0    |
| S17_extracted_k141_154387  | 3189 | No | NA | 0 | 5 | Not-determined | Genome-fragment | NA | 0    |
| S17_extracted_k141_168332  | 3728 | No | NA | 0 | 1 | Not-determined | Genome-fragment | NA | 0    |
| S17_extracted_k141_168339  | 1509 | No | NA | 0 | 1 | Not-determined | Genome-fragment | NA | 0    |
| S1_vs_k141_111277   full   | 1025 | No | NA | 2 | 0 | Low-quality    | Genome-fragment | NA | 2.13 |
| S3_extracted_k141_68770    | 1025 | No | NA | 0 | 0 | Low-quality    | Genome-fragment | NA | 1.66 |
| S2_vs_k141_17446   full    | 1025 | No | NA | 0 | 0 | Low-quality    | Genome-fragment | NA | 0    |
| S3_vs_k141_127211   full   | 1025 | No | NA | 1 | 0 | Low-quality    | Genome-fragment | NA | 2.82 |
| S17_extracted_k141_20175   | 3704 | No | NA | 0 | 1 | Not-determined | Genome-fragment | NA | 0    |
| S17_extracted_k141_168350  | 1055 | No | NA | 0 | 0 | Not-determined | Genome-fragment | NA | 0    |
| S17_extracted_k141_110238  | 4343 | No | NA | 0 | 1 | Not-determined | Genome-fragment | NA | 0    |
| S17_extracted_k141_102269  | 1546 | No | NA | 0 | 1 | Not-determined | Genome-fragment | NA | 0    |
| S17_extracted_k141_94273   | 1228 | No | NA | 0 | 0 | Not-determined | Genome-fragment | NA | 0    |
| S17_extracted_k141_175125  | 1623 | No | NA | 0 | 1 | Not-determined | Genome-fragment | NA | 0    |
| S17_extracted_k141_131114  | 1110 | No | NA | 0 | 1 | Not-determined | Genome-fragment | NA | 0    |
| S5_vs_k141_52007   full    | 1025 | No | NA | 2 | 0 | Low-quality    | Genome-fragment | NA | 2.45 |
| S17_extracted_k141_57939   | 2317 | No | NA | 0 | 2 | Not-determined | Genome-fragment | NA | 0    |
| S17_extracted_k141_131125  | 1092 | No | NA | 0 | 1 | Not-determined | Genome-fragment | NA | 0    |
| S17_extracted_k141_161442  | 1132 | No | NA | 0 | 2 | Not-determined | Genome-fragment | NA | 0    |
| S17_extracted_k141_168377  | 3402 | No | NA | 0 | 2 | Not-determined | Genome-fragment | NA | 0    |
| S5_vs_k141_49799   full    | 1025 | No | NA | 1 | 0 | Low-quality    | Genome-fragment | NA | 1.68 |
| S17_extracted_k141_168389  | 1035 | No | NA | 0 | 1 | Not-determined | Genome-fragment | NA | 0    |
| S5_vs_k141_111120   full   | 1025 | No | NA | 0 | 1 | Low-quality    | Genome-fragment | NA | 0.53 |
| S5_vs_k141_39412   H2gme   | 1025 | No | NA | 0 | 0 | Low-quality    | Genome-fragment | NA | 2.47 |
| S17_extracted_109321       | 1025 | No | NA | 0 | 0 | Low-quality    | Genome-fragment | NA | 2.45 |
| S17_extracted_k141_146470  | 1722 | No | NA | 0 | 2 | Not-determined | Genome-fragment | NA | 0    |
| S17_extracted_k141_164375  | 1241 | No | NA | 0 | 1 | Not-determined | Genome-fragment | NA | 0    |
| S17_extracted_k141_154472  | 1598 | No | NA | 0 | 1 | Not-determined | Genome-fragment | NA | 0    |
| S7_vs_102924   full        | 1025 | No | NA | 1 | 0 | Low-quality    | Genome-fragment | NA | 2.51 |
| S17_extracted_k141_17998   | 2263 | No | NA | 0 | 2 | Not-determined | Genome-fragment | NA | 0    |
| S17_extracted_k141_58004   | 1710 | No | NA | 0 | 1 | Not-determined | Genome-fragment | NA | 0    |
| S17_extracted_k141_117222  | 1251 | No | NA | 0 | 1 | Not-determined | Genome-fragment | NA | 0    |
| S17_extracted_k141_36630   | 3129 | No | NA | 0 | 0 | Not-determined | Genome-fragment | NA | 0    |
| S17_extracted_k141_146556  | 1435 | No | NA | 0 | 1 | Not-determined | Genome-fragment | NA | 0    |
| S17_extracted_k141_117234  | 1065 | No | NA | 0 | 1 | Not-determined | Genome-fragment | NA | 0    |
| S7_vs_112255   H2gme       | 1025 | No | NA | 1 | 0 | Low-quality    | Genome-fragment | NA | 2.91 |
| S16_extracted_80231        | 1025 | No | NA | 0 | 0 | Low-quality    | Genome-fragment | NA | 1.71 |
| S17_extracted_k141_138964  | 1070 | No | NA | 0 | 0 | Not-determined | Genome-fragment | NA | 0    |
| S16_extracted_170284       | 1025 | No | NA | 0 | 0 | Low-quality    | Genome-fragment | NA | 1.04 |
| S17_extracted_k141_80025   | 5180 | No | NA | 0 | 0 | Not-determined | Genome-fragment | NA | 0    |
| S10_extracted_68437        | 1025 | No | NA | 0 | 0 | Low-quality    | Genome-fragment | NA | 2.05 |
| S17_extracted_k141_6209    | 1004 | No | NA | 0 | 0 | Not-determined | Genome-fragment | NA | 0    |
| S10_vs_19377   H2gme       | 1025 | No | NA | 2 | 0 | Low-quality    | Genome-fragment | NA | 2.74 |
| S12_extracted_k141_139554  | 1025 | No | NA | 0 | 2 | Low-quality    | Genome-fragment | NA | 0.86 |
| S12_extracted_k141_108233  | 1025 | No | NA | 0 | 1 | Low-quality    | Genome-fragment | NA | 1.29 |
| S17_extracted_k141_44457   | 1035 | No | NA | 0 | 0 | Not-determined | Genome-fragment | NA | 0    |
| S17_extracted_k141_131207  | 2820 | No | NA | 0 | 0 | Not-determined | Genome-fragment | NA | 0    |
| S17_extracted_k141_110438  | 1148 | No | NA | 0 | 2 | Not-determined | Genome-fragment | NA | 0    |
| S12_vs_k141_130491   full  | 1025 | No | NA | 1 | 0 | Low-quality    | Genome-fragment | NA | 2.3  |
| S17_extracted_k141_36213   | 1361 | No | NA | 0 | 2 | Not-determined | Genome-fragment | NA | 0    |
| S6_extracted_k141_52909    | 1025 | No | NA | 1 | 0 | Low-quality    | Genome-fragment | NA | 2.08 |
| S8_vs_k141_166455   full   | 1025 | No | NA | 0 | 1 | Low-quality    | Genome-fragment | NA | 1.75 |
| S8_vs_k141_63960   full    | 1025 | No | NA | 0 | 0 | Low-quality    | Genome-fragment | NA | 0.3  |
| S17_extracted_k141_124018  | 1016 | No | NA | 0 | 5 | Not-determined | Genome-fragment | NA | 0    |
| S17_extracted_k141_175310  | 1016 | No | NA | 0 | 0 | Not-determined | Genome-fragment | NA | 0    |
| S17_extracted_k141_131244  | 1060 | No | NA | 0 | 2 | Not-determined | Genome-fragment | NA | 0    |
| S17_extracted_k141_43623   | 1194 | No | NA | 0 | 0 | Low-quality    | Genome-fragment | NA | 0    |
| S9_extracted_k141_21561    | 1026 | No | NA | 0 | 1 | Low-quality    | Genome-fragment | NA | 2.44 |
| S17_extracted_k141_154660  | 2658 | No | NA | 0 | 1 | Not-determined | Genome-fragment | NA | 0    |
| S9_extracted_k141_78037    | 1026 | No | NA | 0 | 0 | Low-quality    | Genome-fragment | NA | 1.74 |
| S17_extracted_k141_58076   | 3809 | No | NA | 0 | 0 | Not-determined | Genome-fragment | NA | 0    |
| S17_extracted_k141_94388   | 1398 | No | NA | 0 | 0 | Not-determined | Genome-fragment | NA | 0    |
| S17_extracted_k141_131286  | 1191 | No | NA | 0 | 1 | Not-determined | Genome-fragment | NA | 0    |
| S17_extracted_k141_58091   | 1438 | No | NA | 0 | 1 | Not-determined | Genome-fragment | NA | 0    |
| S17_extracted_k141_72773   | 2132 | No | NA | 0 | 1 | Not-determined | Genome-fragment | NA | 0    |
| S17_extracted_k141_154670  | 5497 | No | NA | 0 | 2 | Not-determined | Genome-fragment | NA | 0    |
| S17_extracted_k141_36263   | 1440 | No | NA | 0 | 1 | Not-determined | Genome-fragment | NA | 0    |
| S13_vs_61038   full        | 1026 | No | NA | 0 | 0 | Low-quality    | Genome-fragment | NA | 1.1  |
| S17_extracted_k141_80139   | 3565 | No | NA | 0 | 2 | Not-determined | Genome-fragment | NA | 0    |
| S17_extracted_k141_86783   | 1310 | No | NA | 0 | 0 | Not-determined | Genome-fragment | NA | 0    |
| S13_vs_103022   full       | 1026 | No | NA | 0 | 0 | Low-quality    | Genome-fragment | NA | 0.47 |
| S14_vs_k141_198055   H2gme | 1026 | No | NA | 1 | 0 | Low-quality    | Genome-fragment | NA | 2.64 |
| S1_extracted_k141_122728   | 1026 | No | NA | 0 | 0 | Low-quality    | Genome-fragment | NA | 1.64 |
| S17_extracted_k141_131327  | 5392 | No | NA | 0 | 4 | Not-determined | Genome-fragment | NA | 0    |
| S17_extracted_k141_27691   | 1942 | No | NA | 0 | 0 | Not-determined | Genome-fragment | NA | 0    |
| S17_extracted_k141_102538  | 1115 | No | NA | 0 | 1 | Not-determined | Genome-fragment | NA | 0    |
| S17_extracted_k141_175389  | 1817 | No | NA | 0 | 0 | Not-determined | Genome-fragment | NA | 0    |
| S17_extracted_k141_131345  | 1077 | No | NA | 0 | 0 | Not-determined | Genome-fragment | NA | 0    |
| S1_vs_k141_16284   full    | 1026 | No | NA | 1 | 0 | Low-quality    | Genome-fragment | NA | 1.6  |
| S17_extracted_k141_43710   | 1152 | No | NA | 0 | 1 | Not-determined | Genome-fragment | NA | 0    |
| S1_vs_k141_77944   H2gme   | 1026 | No | NA | 1 | 0 | Low-quality    | Genome-fragment | NA | 1.62 |
| S17_extracted_k141_4355    | 1539 | No | NA | 0 | 1 | Not-determined | Genome-fragment | NA | 0    |
| S17_extracted_k141_1338    | 2338 | No | NA | 0 | 0 | Low-quality    | Genome-fragment | NA | 0    |
| S3_extracted_k141_43795    | 1026 | No | NA | 0 | 0 | Low-quality    | Genome-fragment | NA | 1.93 |
| S17_extracted_k141_110556  | 2783 | No | NA | 0 | 1 | Not-determined | Genome-fragment | NA | 0    |
| S17_extracted_k141_43725   | 2052 | No | NA | 0 | 0 | Not-determined | Genome-fragment | NA | 0    |
| S17_extracted_k141_86873   | 1609 | No | NA | 0 | 1 | Not-determined | Genome-fragment | NA | 0    |
| S17_extracted_k141_175434  | 1372 | No | NA | 0 | 2 | Not-determined | Genome-fragment | NA | 0    |
| S17_extracted_k141_27734   | 1296 | No | NA | 0 | 1 | Not-determined | Genome-fragment | NA | 0    |
| S5_vs_k141_110104   full   | 1026 | No | NA | 0 | 0 | Low-quality    | Genome-fragment | NA | 1.91 |
| S17_extracted_k141_175449  | 3423 | No | NA | 0 | 1 | Not-determined | Genome-fragment | NA | 0    |
| S17_extracted_k141_175451  | 1114 | No | NA | 0 | 0 | Not-determined | Genome-fragment | NA | 0    |
| S17_extracted_k141_79198   | 1637 | No | NA | 0 | 1 | Not-determined | Genome-fragment | NA | 0    |
| S5_vs_k141_43122   full    | 1026 | No | NA | 1 | 0 | Low-quality    | Genome-fragment | NA | 2.27 |
| S5_vs_k141_2888   full     | 1026 | No | NA | 2 | 0 | Low-quality    | Genome-fragment | NA | 2.4  |
| S17_extracted_k141_175465  | 1085 | No | NA | 0 | 1 | Not-determined | Genome-fragment | NA | 0    |
| S17_extracted_k141_154761  | 7731 | No | NA | 0 | 1 | Not-determined | Genome-fragment | NA | 0    |
| S17_extracted_k141_20525   | 3895 | No | NA | 0 | 1 | Not-determined | Genome-fragment | NA | 0    |
| S5_vs_k141_127141   full   | 1026 | No | NA | 2 | 0 | Low-quality    | Genome-fragment | NA | 2.24 |
| S17_extracted_k141_117503  | 1025 | No | NA | 0 | 0 | Not-determined | Genome-fragment | NA | 0    |
| S17_extracted_k141_20531   | 1215 | No | NA | 0 | 2 | Not-determined | Genome-fragment | NA | 0    |
| S17_extracted_k141_36367   | 8162 | No | NA | 0 | 4 | Not-determined | Genome-fragment | NA | 0    |
| S5_vs_k141_61744   full    | 1026 | No | NA | 0 | 0 | Low-quality    | Genome-fragment | NA | 1.73 |
| S17_extracted_k141_58235   | 1074 | No | NA | 0 | 1 | Not-determined | Genome-fragment | NA | 0    |
| S17_extracted_k141_131451  | 1442 | No | NA | 0 | 0 | Not-determined | Genome-fragment | NA | 0    |
| S7_extracted_100664        | 1026 | No | NA | 0 | 0 | Low-quality    | Genome-fragment | NA | 2.1  |
| S17_extracted_k141_139165  | 1154 | No | NA | 0 | 1 | Not-determined | Genome-fragment | NA | 0    |
| S17_extracted_k141_58242   | 1163 | No | NA | 0 | 1 | Not-determined | Genome-fragment | NA | 0    |
| S17_extracted_k141_94486   | 2038 | No | NA | 0 | 0 | Not-determined | Genome-fragment | NA | 0    |
| S17_extracted_k141_13500   | 1870 | No | NA | 0 | 1 | Not-determined | Genome-fragment | NA | 0    |
| S17_extracted_k141_102671  | 1843 | No | NA | 0 | 1 | Not-determined | Genome-fragment | NA | 0    |
| S17_extracted_k141_51008   | 1144 | No | NA | 0 | 2 | Not-determined | Genome-fragment | NA | 0    |
| S7_vs_84670   full         | 1026 | No | NA | 0 | 0 | Low-quality    | Genome-fragment | NA | 2.06 |
| S17_extracted_k141_110623  | 3281 | No | NA | 0 | 0 | Not-determined | Genome-fragment | NA | 0    |
| S17_extracted_k141_94502   | 1004 | No | NA | 0 | 0 | Not-determined | Genome-fragment | NA | 0    |
| S8_vs_k141_123577   full   | 1026 | No | NA | 0 | 1 | Low-quality    | Genome-fragment | NA | 1.7  |
| S9_vs_k141_2681   full     | 1027 | No | NA | 1 | 0 | Low-quality    | Genome-fragment | NA | 2.31 |
| S17_extracted_k141_146926  | 1409 | No | NA | 0 | 0 | Not-determined | Genome-fragment | NA | 0    |
| S17_extracted_k141_30356   | 1392 | No | NA | 0 | 0 | Not-determined | Genome-fragment | NA | 0    |
| S14_vs_k141_56805   full   | 1027 | No | NA | 0 | 0 | Low-quality    | Genome-fragment | NA | 0.58 |
| S17_extracted_k141_146940  | 1607 | No | NA | 0 | 1 | Not-determined | Genome-fragment | NA | 0    |
| S17_extracted_k141_51045   | 1331 | No | NA | 0 | 1 | Not-determined | Genome-fragment | NA | 0    |
| S17_extracted_k141_117540  | 1039 | No | NA | 0 | 1 | Not-determined | Genome-fragment | NA | 0    |
| S17_extracted_k141_124273  | 1638 | No | NA | 0 | 1 | Not-determined | Genome-fragment | NA | 0    |
| S17_extracted_k141_87000   | 2873 | No | NA | 0 | 4 | Not-determined | Genome-fragment | NA | 0    |
| S17_extracted_k141_27845   | 1112 | No | NA | 0 | 0 | Not-determined | Genome-fragment | NA | 0    |
| S17_extracted_k141_13557   | 3770 | No | NA | 0 | 3 | Not-determined | Genome-fragment | NA | 0    |
| S17_extracted_k141_161865  | 1794 | No | NA | 0 | 1 | Not-determined | Genome-fragment | NA | 0    |
| S17_extracted_k141_43877   | 1496 | No | NA | 0 | 1 | Not-determined | Genome-fragment | NA | 0    |
| S17_extracted_k141_131534  | 1342 | No | NA | 0 | 1 | Not-determined | Genome-fragment | NA | 0    |
| S1_vs_k141_16329   full    | 1027 | No | NA | 0 | 0 | Low-quality    | Genome-fragment | NA | 0.65 |
| S17_extracted_k141_80423   | 1038 | No | NA | 0 | 1 |                |                 |    |      |



|                           |       |    |    |   |   |                |                 |    |      |
|---------------------------|-------|----|----|---|---|----------------|-----------------|----|------|
| S17_extracted_k141_175638 | 1182  | No | NA | 0 | 0 | Not-determined | Genome-fragment | NA | 0    |
| S17_extracted_k141_155055 | 1187  | No | NA | 0 | 1 | Not-determined | Genome-fragment | NA | 0    |
| S17_extracted_k141_175646 | 1020  | No | NA | 0 | 1 | Not-determined | Genome-fragment | NA | 0    |
| S17_extracted_k141_6631   | 1255  | No | NA | 0 | 1 | Not-determined | Genome-fragment | NA | 0    |
| S17_extracted_k141_73167  | 1263  | No | NA | 0 | 0 | Not-determined | Genome-fragment | NA | 0    |
| S17_extracted_k141_162022 | 1536  | No | NA | 0 | 0 | Not-determined | Genome-fragment | NA | 0    |
| S12_vs_k141_77311[full]   | 1027  | No | NA | 1 | 0 | Low-quality    | Genome-fragment | NA | 2.37 |
| S17_extracted_k141_175670 | 1030  | No | NA | 0 | 1 | Not-determined | Genome-fragment | NA | 0    |
| S2_extracted_k141_17721   | 1027  | No | NA | 0 | 0 | Low-quality    | Genome-fragment | NA | 2.56 |
| S17_extracted_k141_73175  | 1107  | No | NA | 0 | 0 | Not-determined | Genome-fragment | NA | 0    |
| S17_extracted_k141_80581  | 1280  | No | NA | 0 | 1 | Not-determined | Genome-fragment | NA | 0    |
| S17_extracted_k141_155047 | 1038  | No | NA | 0 | 1 | Not-determined | Genome-fragment | NA | 0    |
| S8_vs_k141_92066[full]    | 1027  | No | NA | 0 | 1 | Low-quality    | Genome-fragment | NA | 0.53 |
| S17_extracted_k141_51284  | 1038  | No | NA | 0 | 1 | Not-determined | Genome-fragment | NA | 0    |
| S17_extracted_k141_55693  | 1028  | No | NA | 0 | 1 | Low-quality    | Genome-fragment | NA | 3.46 |
| S17_extracted_k141_139373 | 1012  | No | NA | 0 | 0 | Not-determined | Genome-fragment | NA | 0    |
| S17_extracted_k141_93125  | 1028  | No | NA | 4 | 0 | Low-quality    | Genome-fragment | NA | 3.39 |
| S17_extracted_k141_168859 | 1702  | No | NA | 0 | 0 | Not-determined | Genome-fragment | NA | 0    |
| S17_extracted_k141_80629  | 1125  | No | NA | 0 | 1 | Not-determined | Genome-fragment | NA | 0    |
| S17_extracted_k141_44060  | 2502  | No | NA | 0 | 1 | Not-determined | Genome-fragment | NA | 0    |
| S17_extracted_k141_124442 | 1590  | No | NA | 0 | 0 | Not-determined | Genome-fragment | NA | 0    |
| S17_extracted_k141_24666  | 4014  | No | NA | 0 | 2 | Not-determined | Genome-fragment | NA | 0    |
| S17_extracted_k141_87208  | 3553  | No | NA | 0 | 0 | Not-determined | Genome-fragment | NA | 0    |
| S17_extracted_k141_124456 | 1064  | No | NA | 0 | 1 | Not-determined | Genome-fragment | NA | 0    |
| S17_extracted_k141_13772  | 1177  | No | NA | 0 | 1 | Not-determined | Genome-fragment | NA | 0    |
| S17_extracted_k141_72520  | 1336  | No | NA | 0 | 0 | Not-determined | Genome-fragment | NA | 0    |
| S11_vs_k141_71077[full]   | 1028  | No | NA | 1 | 0 | Low-quality    | Genome-fragment | NA | 2.2  |
| S14_vs_k141_115822[full]  | 1028  | No | NA | 0 | 2 | Low-quality    | Genome-fragment | NA | 2.46 |
| S17_extracted_k141_131755 | 1790  | No | NA | 0 | 1 | Not-determined | Genome-fragment | NA | 0    |
| S17_extracted_k141_28031  | 1043  | No | NA | 0 | 0 | Not-determined | Genome-fragment | NA | 0    |
| S17_extracted_k141_6720   | 1323  | No | NA | 0 | 2 | Not-determined | Genome-fragment | NA | 0    |
| S17_extracted_k141_13795  | 2995  | No | NA | 0 | 2 | Not-determined | Genome-fragment | NA | 0    |
| S17_extracted_k141_51337  | 2430  | No | NA | 0 | 0 | Not-determined | Genome-fragment | NA | 0    |
| S17_extracted_k141_44102  | 1160  | No | NA | 0 | 0 | Not-determined | Genome-fragment | NA | 0    |
| S17_extracted_k141_73279  | 3533  | No | NA | 0 | 4 | Not-determined | Genome-fragment | NA | 0    |
| S17_extracted_k141_30705  | 1171  | No | NA | 0 | 1 | Not-determined | Genome-fragment | NA | 0    |
| S17_extracted_k141_147278 | 1052  | No | NA | 0 | 1 | Not-determined | Genome-fragment | NA | 0    |
| S17_extracted_k141_38523  | 1161  | No | NA | 0 | 0 | Not-determined | Genome-fragment | NA | 0    |
| S17_extracted_k141_147284 | 1225  | No | NA | 0 | 1 | Not-determined | Genome-fragment | NA | 0    |
| S1_vs_k141_134818[full]   | 1028  | No | NA | 0 | 0 | Low-quality    | Genome-fragment | NA | 2.5  |
| S17_extracted_k141_28055  | 1854  | No | NA | 0 | 3 | Not-determined | Genome-fragment | NA | 0    |
| S17_extracted_k141_139438 | 1533  | No | NA | 0 | 1 | Not-determined | Genome-fragment | NA | 0    |
| S17_extracted_k141_131808 | 1204  | No | NA | 0 | 1 | Not-determined | Genome-fragment | NA | 0    |
| S1_vs_k141_77523[full]    | 1028  | No | NA | 0 | 0 | Low-quality    | Genome-fragment | NA | 1.26 |
| S1_vs_k141_104936[full]   | 1028  | No | NA | 1 | 0 | Low-quality    | Genome-fragment | NA | 2.63 |
| S1_vs_k141_102248[full]   | 1028  | No | NA | 0 | 0 | Low-quality    | Genome-fragment | NA | 2.14 |
| S17_extracted_k141_168908 | 1259  | No | NA | 0 | 1 | Not-determined | Genome-fragment | NA | 0    |
| S17_extracted_k141_139473 | 1057  | No | NA | 0 | 2 | Not-determined | Genome-fragment | NA | 0    |
| S17_extracted_k141_73332  | 4041  | No | NA | 0 | 0 | Not-determined | Genome-fragment | NA | 0    |
| S17_extracted_k141_64655  | 5584  | No | NA | 0 | 2 | Not-determined | Genome-fragment | NA | 0    |
| S17_extracted_k141_6794   | 1289  | No | NA | 0 | 2 | Not-determined | Genome-fragment | NA | 0    |
| S5_vs_k141_18882[full]    | 1028  | No | NA | 0 | 2 | Low-quality    | Genome-fragment | NA | 2.64 |
| S17_extracted_k141_51384  | 1174  | No | NA | 0 | 0 | Not-determined | Genome-fragment | NA | 0    |
| S17_extracted_k141_20776  | 1283  | No | NA | 0 | 1 | Not-determined | Genome-fragment | NA | 0    |
| S17_extracted_k141_87332  | 1524  | No | NA | 0 | 0 | Not-determined | Genome-fragment | NA | 0    |
| S17_extracted_k141_44156  | 10711 | No | NA | 0 | 6 | Not-determined | Genome-fragment | NA | 0    |
| S17_extracted_k141_162120 | 1185  | No | NA | 0 | 1 | Not-determined | Genome-fragment | NA | 0    |
| S17_extracted_k141_51393  | 2332  | No | NA | 0 | 1 | Not-determined | Genome-fragment | NA | 0    |
| S17_extracted_k141_20795  | 1065  | No | NA | 0 | 0 | Not-determined | Genome-fragment | NA | 0    |
| S17_extracted_k141_6807   | 5633  | No | NA | 0 | 2 | Not-determined | Genome-fragment | NA | 0    |
| S17_extracted_k141_80659  | 1667  | No | NA | 0 | 1 | Not-determined | Genome-fragment | NA | 0    |
| S17_extracted_k141_168960 | 2921  | No | NA | 1 | 1 | Not-determined | Genome-fragment | NA | 0    |
| S7_extracted_S14          | 1028  | No | NA | 1 | 0 | Low-quality    | Genome-fragment | NA | 4.66 |
| S7_vs_18537[full]         | 1028  | No | NA | 0 | 0 | Low-quality    | Genome-fragment | NA | 2.42 |
| S17_extracted_k141_94823  | 1453  | No | NA | 0 | 1 | Not-determined | Genome-fragment | NA | 0    |
| S17_extracted_k141_175834 | 2232  | No | NA | 0 | 1 | Not-determined | Genome-fragment | NA | 0    |
| S17_extracted_k141_64712  | 1438  | No | NA | 0 | 0 | Not-determined | Genome-fragment | NA | 0    |
| S17_extracted_k141_87397  | 3167  | No | NA | 0 | 1 | Not-determined | Genome-fragment | NA | 0    |
| S17_extracted_k141_51451  | 1397  | No | NA | 0 | 1 | Not-determined | Genome-fragment | NA | 0    |
| S17_extracted_k141_162180 | 1141  | No | NA | 0 | 1 | Not-determined | Genome-fragment | NA | 0    |
| S17_extracted_k141_169034 | 1024  | No | NA | 0 | 0 | Not-determined | Genome-fragment | NA | 0    |
| S17_extracted_k141_131935 | 1862  | No | NA | 0 | 2 | Not-determined | Genome-fragment | NA | 0    |
| S17_extracted_k141_13885  | 5568  | No | NA | 0 | 3 | Not-determined | Genome-fragment | NA | 0    |
| S16_vs_23301[full]        | 1028  | No | NA | 0 | 0 | Low-quality    | Genome-fragment | NA | 0.63 |
| S17_extracted_k141_162200 | 1175  | No | NA | 0 | 1 | Not-determined | Genome-fragment | NA | 0    |
| S17_extracted_k141_64767  | 1682  | No | NA | 0 | 1 | Not-determined | Genome-fragment | NA | 0    |
| S10_vs_119900[full]       | 1028  | No | NA | 0 | 0 | Low-quality    | Genome-fragment | NA | 1.98 |
| S17_extracted_k141_175895 | 1203  | No | NA | 0 | 0 | Not-determined | Genome-fragment | NA | 0    |
| S17_extracted_k141_80767  | 1617  | No | NA | 0 | 2 | Not-determined | Genome-fragment | NA | 0    |
| S12_extracted_k141_180636 | 1028  | No | NA | 0 | 1 | Low-quality    | Genome-fragment | NA | 0.66 |
| S17_extracted_k141_175970 | 1389  | No | NA | 0 | 0 | Not-determined | Genome-fragment | NA | 0    |
| S12_vs_k141_164692[full]  | 1028  | No | NA | 0 | 2 | Low-quality    | Genome-fragment | NA | 0.73 |
| S17_extracted_k141_13941  | 3223  | No | NA | 0 | 3 | Not-determined | Genome-fragment | NA | 0    |
| S8_extracted_k141_32456   | 1028  | No | NA | 0 | 0 | Low-quality    | Genome-fragment | NA | 2.3  |
| S17_extracted_k141_162287 | 3896  | No | NA | 0 | 2 | Not-determined | Genome-fragment | NA | 0    |
| S11_vs_k141_88844[full]   | 1029  | No | NA | 0 | 1 | Low-quality    | Genome-fragment | NA | 0.58 |
| S17_extracted_k141_13948  | 1377  | No | NA | 0 | 2 | Not-determined | Genome-fragment | NA | 0    |
| S17_extracted_k141_51566  | 2063  | No | NA | 0 | 0 | Not-determined | Genome-fragment | NA | 0    |
| S3_extracted_k141_107211  | 1029  | No | NA | 0 | 0 | Low-quality    | Genome-fragment | NA | 1.02 |
| S17_extracted_k141_139626 | 1352  | No | NA | 0 | 0 | Not-determined | Genome-fragment | NA | 0    |
| S3_vs_k141_34511[full]    | 1029  | No | NA | 0 | 0 | Low-quality    | Genome-fragment | NA | 2.06 |
| S3_vs_k141_37161[full]    | 1029  | No | NA | 0 | 0 | Low-quality    | Genome-fragment | NA | 0.69 |
| S5_extracted_k141_137102  | 1029  | No | NA | 0 | 0 | Low-quality    | Genome-fragment | NA | 2.48 |
| S17_extracted_k141_64800  | 1114  | No | NA | 0 | 1 | Not-determined | Genome-fragment | NA | 0    |
| S17_extracted_k141_162326 | 1564  | No | NA | 0 | 1 | Not-determined | Genome-fragment | NA | 0    |
| S17_extracted_k141_51601  | 7838  | No | NA | 0 | 3 | Not-determined | Genome-fragment | NA | 0    |
| S17_extracted_k141_80858  | 3602  | No | NA | 0 | 0 | Not-determined | Genome-fragment | NA | 0    |
| S17_extracted_k141_21028  | 3249  | No | NA | 0 | 2 | Not-determined | Genome-fragment | NA | 0    |
| S17_extracted_k141_132117 | 6162  | No | NA | 0 | 1 | Not-determined | Genome-fragment | NA | 0    |
| S17_extracted_k141_132123 | 1067  | No | NA | 0 | 0 | Not-determined | Genome-fragment | NA | 0    |
| S17_extracted_k141_64847  | 1235  | No | NA | 0 | 2 | Not-determined | Genome-fragment | NA | 0    |
| S17_extracted_k141_169182 | 1145  | No | NA | 0 | 1 | Not-determined | Genome-fragment | NA | 0    |
| S17_extracted_k141_176045 | 1006  | No | NA | 0 | 0 | Not-determined | Genome-fragment | NA | 0    |
| S17_extracted_k141_73623  | 1879  | No | NA | 0 | 0 | Not-determined | Genome-fragment | NA | 0    |
| S17_extracted_k141_51634  | 1350  | No | NA | 0 | 1 | Not-determined | Genome-fragment | NA | 0    |
| S17_extracted_k141_147636 | 1818  | No | NA | 0 | 2 | Not-determined | Genome-fragment | NA | 0    |
| S17_extracted_k141_169208 | 1925  | No | NA | 0 | 1 | Not-determined | Genome-fragment | NA | 0    |
| S17_extracted_k141_7049   | 1385  | No | NA | 0 | 2 | Not-determined | Genome-fragment | NA | 0    |
| NC1_of_k141_1119          | 1029  | No | NA | 0 | 0 | Low-quality    | Genome-fragment | NA | 1.3  |
| S17_extracted_k141_28399  | 1119  | No | NA | 0 | 1 | Not-determined | Genome-fragment | NA | 0    |
| S17_extracted_k141_51658  | 1047  | No | NA | 0 | 1 | Not-determined | Genome-fragment | NA | 0    |
| S17_extracted_k141_58670  | 1519  | No | NA | 0 | 1 | Not-determined | Genome-fragment | NA | 0    |
| S17_extracted_k141_7082   | 1090  | No | NA | 0 | 1 | Not-determined | Genome-fragment | NA | 0    |
| S16_extracted_35204       | 1029  | No | NA | 1 | 0 | Low-quality    | Genome-fragment | NA | 2.05 |
| S17_extracted_k141_14909  | 1086  | No | NA | 0 | 4 | Not-determined | Genome-fragment | NA | 0    |
| S17_extracted_k141_103373 | 3193  | No | NA | 0 | 1 | Not-determined | Genome-fragment | NA | 0    |
| S17_extracted_k141_95010  | 2119  | No | NA | 0 | 1 | Not-determined | Genome-fragment | NA | 0    |
| S16_vs_k14209[full]       | 1029  | No | NA | 0 | 0 | Low-quality    | Genome-fragment | NA | 2.33 |
| S17_extracted_k141_95011  | 1225  | No | NA | 0 | 0 | Not-determined | Genome-fragment | NA | 0    |
| S17_extracted_k141_28424  | 1147  | No | NA | 0 | 1 | Not-determined | Genome-fragment | NA | 0    |
| S17_extracted_k141_124776 | 1395  | No | NA | 0 | 1 | Not-determined | Genome-fragment | NA | 0    |
| S17_extracted_k141_87633  | 1769  | No | NA | 0 | 1 | Not-determined | Genome-fragment | NA | 0    |
| S17_extracted_k141_87634  | 2007  | No | NA | 0 | 0 | Not-determined | Genome-fragment | NA | 0    |
| S17_extracted_k141_73684  | 3401  | No | NA | 0 | 3 | Not-determined | Genome-fragment | NA | 0    |
| S17_extracted_k141_7132   | 1103  | No | NA | 0 | 1 | Not-determined | Genome-fragment | NA | 0    |
| S12_vs_k141_148654[full]  | 1029  | No | NA | 0 | 0 | Low-quality    | Genome-fragment | NA | 0.75 |
| S8_vs_k141_103993[full]   | 1029  | No | NA | 0 | 1 | Low-quality    | Genome-fragment | NA | 0.62 |
| S17_extracted_k141_21170  | 3056  | No | NA | 0 | 2 | Not-determined | Genome-fragment | NA | 0    |
| S17_extracted_k141_21171  | 1305  | No | NA | 0 | 1 | Not-determined | Genome-fragment | NA | 0    |
| S17_extracted_k141_162470 | 1801  | No | NA | 0 | 1 | Not-determined | Genome-fragment | NA | 0    |
| S17_extracted_k141_73695  | 1534  | No | NA | 0 | 0 | Not-determined | Genome-fragment | NA | 0    |
| S17_extracted_k141_36814  | 3372  | No | NA | 0 | 2 | Not-determined | Genome-fragment | NA | 0    |
| S17_vs_k141_79878[full]   | 1030  | No | NA | 0 | 0 | Low-quality    | Genome-fragment | NA | 1.32 |
| S17_extracted_k141_169309 | 1092  | No | NA | 0 | 2 | Not-determined | Genome-fragment | NA | 0    |
| S17_extracted_k141_28487  | 4927  | No | NA | 0 | 1 | Not-determined | Genome-fragment | NA | 0    |
| S17_extracted_k141_28488  | 1091  | No | NA | 0 | 1 | Not-determined | Genome-fragment | NA | 0    |
| S9_extracted_k141_51257   | 1030  | No | NA | 0 | 0 | Low-quality    | Genome-fragment | NA | 1.93 |
| S17_extracted_k141_118070 | 3217  | No | NA | 0 | 2 | Not-determined | Genome-fragment | NA | 0    |
| S17_extracted_k141_169321 | 3501  | No | NA | 0 | 2 | Not-determined | Genome-fragment | NA | 0    |
| S17_extracted_k141_169344 | 1068  | No | NA | 0 | 0 | Not-determined | Genome-fragment | NA | 0    |
| S9_vs_k141_17141[full]    | 1030  | No | NA | 1 | 0 | Low-quality    | Genome-fragment | NA | 3.05 |
| S17_extracted_k141_81071  | 2062  | No | NA | 0 | 2 | Not-determined | Genome-fragment | NA | 0    |
| S17_extracted_k141_176200 | 5838  | No | NA | 0 | 4 | Not-determined | Genome-fragment | NA | 0    |
| S14_extracted_k141_55052  | 1030  | No | NA | 0 | 0 | Low-quality    | Genome-fragment | NA | 3.23 |
| S1_extracted_k141_20971   | 1030  |    |    |   |   |                |                 |    |      |



|                           |        |    |    |    |   |                |                 |       |   |
|---------------------------|--------|----|----|----|---|----------------|-----------------|-------|---|
| S17_extracted_k141_81226  | 1338   | No | NA | 0  | 0 | Not-determined | Genome-fragment | NA    | 0 |
| S17_extracted_k141_65321  | 8451   | No | NA | 0  | 3 | Not-determined | Genome-fragment | NA    | 0 |
| S17_extracted_k141_176441 | 3900   | No | NA | 0  | 2 | Not-determined | Genome-fragment | NA    | 0 |
| S17_extracted_k141_95354  | 3319   | No | NA | 0  | 2 | Not-determined | Genome-fragment | NA    | 0 |
| S17_extracted_k141_169722 | 1573   | No | NA | 0  | 2 | Not-determined | Genome-fragment | NA    | 0 |
| S17_extracted_k141_169731 | 7446   | No | NA | 0  | 4 | Not-determined | Genome-fragment | NA    | 0 |
| S17_extracted_k141_169737 | 1043   | No | NA | 0  | 0 | Not-determined | Genome-fragment | NA    | 0 |
| S17_extracted_k141_28883  | 1010   | No | NA | 0  | 0 | Not-determined | Genome-fragment | NA    | 0 |
| S17_extracted_k141_17967  | 5528   | No | NA | 0  | 1 | Not-determined | Genome-fragment | NA    | 0 |
| S17_extracted_k141_132648 | 3640   | No | NA | 0  | 2 | Not-determined | Genome-fragment | NA    | 0 |
| S10_vs_12591[full]        | 1030   | No | NA | 0  | 0 | Low-quality    | Genome-fragment | 1.75  | 0 |
| S12_extracted_k141_120368 | 1030   | No | NA | 0  | 0 | Low-quality    | Genome-fragment | 2.34  | 0 |
| S12_vs_k141_119888[full]  | 1030   | No | NA | 1  | 0 | Low-quality    | Genome-fragment | 2.14  | 0 |
| S17_extracted_k141_14436  | 4219   | No | NA | 0  | 4 | Not-determined | Genome-fragment | NA    | 0 |
| S17_extracted_k141_14439  | 1365   | No | NA | 0  | 3 | Not-determined | Genome-fragment | NA    | 0 |
| S17_extracted_k141_15045  | 3456   | No | NA | 0  | 1 | Not-determined | Genome-fragment | NA    | 0 |
| S17_extracted_k141_140087 | 1319   | No | NA | 0  | 1 | Not-determined | Genome-fragment | NA    | 0 |
| S17_extracted_k141_65423  | 1317   | No | NA | 0  | 1 | Not-determined | Genome-fragment | NA    | 0 |
| S17_extracted_k141_65430  | 1468   | No | NA | 0  | 0 | Not-determined | Genome-fragment | NA    | 0 |
| S4_extracted_10627        | 1030   | No | NA | 5  | 0 | Low-quality    | Genome-fragment | 3.38  | 0 |
| S17_extracted_k141_132696 | 3778   | No | NA | 0  | 1 | Not-determined | Genome-fragment | NA    | 0 |
| S17_extracted_k141_28958  | 1826   | No | NA | 0  | 1 | Not-determined | Genome-fragment | NA    | 0 |
| S17_extracted_k141_14477  | 1040   | No | NA | 0  | 1 | Not-determined | Genome-fragment | NA    | 0 |
| S17_extracted_k141_21718  | 32371  | No | NA | 0  | 6 | High-quality   | High-quality    | 93.35 | 0 |
| S17_extracted_k141_39082  | 2196   | No | NA | 0  | 1 | Not-determined | Genome-fragment | NA    | 0 |
| S17_extracted_k141_88117  | 1159   | No | NA | 0  | 1 | Not-determined | Genome-fragment | NA    | 0 |
| S17_extracted_k141_81232  | 102314 | No | NA | 16 | 1 | Complete       | High-quality    | 100   | 0 |
| S17_extracted_k141_132711 | 2332   | No | NA | 0  | 2 | Not-determined | Genome-fragment | NA    | 0 |
| S17_extracted_k141_95495  | 9112   | No | NA | 0  | 2 | Not-determined | Genome-fragment | NA    | 0 |
| S17_extracted_k141_95413  | 6729   | No | NA | 0  | 2 | Not-determined | Genome-fragment | NA    | 0 |
| S17_extracted_k141_140121 | 1089   | No | NA | 0  | 0 | Not-determined | Genome-fragment | NA    | 0 |
| S17_extracted_k141_21210  | 7892   | No | NA | 0  | 3 | Not-determined | Genome-fragment | NA    | 0 |
| S17_extracted_k141_176593 | 2473   | No | NA | 0  | 6 | Not-determined | Genome-fragment | NA    | 0 |
| S17_extracted_k141_81275  | 1629   | No | NA | 0  | 1 | Not-determined | Genome-fragment | NA    | 0 |
| S17_extracted_k141_95462  | 1057   | No | NA | 0  | 1 | Not-determined | Genome-fragment | NA    | 0 |
| S17_extracted_k141_88186  | 3488   | No | NA | 0  | 1 | Not-determined | Genome-fragment | NA    | 0 |
| S8_vs_k141_92992[full]    | 1030   | No | NA | 0  | 2 | Low-quality    | Genome-fragment | 1.66  | 0 |
| S17_extracted_k141_125242 | 2674   | No | NA | 0  | 1 | Not-determined | Genome-fragment | NA    | 0 |
| S17_extracted_k141_125256 | 1575   | No | NA | 0  | 2 | Not-determined | Genome-fragment | NA    | 0 |
| S17_extracted_k141_21787  | 4162   | No | NA | 0  | 3 | Not-determined | Genome-fragment | NA    | 0 |
| S17_extracted_k141_176614 | 1476   | No | NA | 0  | 1 | Not-determined | Genome-fragment | NA    | 0 |
| S17_extracted_k141_132802 | 1353   | No | NA | 0  | 2 | Not-determined | Genome-fragment | NA    | 0 |
| S17_extracted_k141_125285 | 1170   | No | NA | 0  | 2 | Not-determined | Genome-fragment | NA    | 0 |
| S17_extracted_k141_176627 | 1233   | No | NA | 0  | 1 | Not-determined | Genome-fragment | NA    | 0 |
| S17_extracted_k141_65628  | 1324   | No | NA | 0  | 0 | Not-determined | Genome-fragment | NA    | 0 |
| S17_extracted_k141_14643  | 3840   | No | NA | 0  | 3 | Not-determined | Genome-fragment | NA    | 0 |
| S17_extracted_k141_176672 | 4516   | No | NA | 0  | 3 | Not-determined | Genome-fragment | NA    | 0 |
| S17_extracted_k141_95633  | 1150   | No | NA | 0  | 0 | Not-determined | Genome-fragment | NA    | 0 |
| S17_extracted_k141_14666  | 1108   | No | NA | 0  | 0 | Not-determined | Genome-fragment | NA    | 0 |
| S17_extracted_k141_176703 | 2247   | No | NA | 0  | 1 | Not-determined | Genome-fragment | NA    | 0 |
| S17_extracted_k141_14675  | 1279   | No | NA | 0  | 0 | Not-determined | Genome-fragment | NA    | 0 |
| S17_extracted_k141_125411 | 1364   | No | NA | 0  | 2 | Not-determined | Genome-fragment | NA    | 0 |
| S8_vs_k141_14440[full]    | 1030   | No | NA | 1  | 0 | Low-quality    | Genome-fragment | 2.11  | 0 |
| S17_extracted_k141_65715  | 1055   | No | NA | 0  | 0 | Not-determined | Genome-fragment | NA    | 0 |
| S17_extracted_k141_132991 | 1243   | No | NA | 0  | 0 | Not-determined | Genome-fragment | NA    | 0 |
| S17_extracted_k141_95777  | 2160   | No | NA | 0  | 1 | Not-determined | Genome-fragment | NA    | 0 |
| S17_extracted_k141_29234  | 1089   | No | NA | 0  | 0 | Not-determined | Genome-fragment | NA    | 0 |
| S17_extracted_k141_125509 | 1144   | No | NA | 0  | 2 | Not-determined | Genome-fragment | NA    | 0 |
| S17_extracted_k141_88411  | 1393   | No | NA | 0  | 0 | Not-determined | Genome-fragment | NA    | 0 |
| S17_extracted_k141_14772  | 2905   | No | NA | 0  | 1 | Not-determined | Genome-fragment | NA    | 0 |
| S17_extracted_k141_65791  | 1447   | No | NA | 0  | 1 | Not-determined | Genome-fragment | NA    | 0 |
| S17_extracted_k141_65806  | 1115   | No | NA | 0  | 2 | Not-determined | Genome-fragment | NA    | 0 |
| S17_extracted_k141_125580 | 3895   | No | NA | 0  | 3 | Not-determined | Genome-fragment | NA    | 0 |
| S17_extracted_k141_32900  | 1031   | No | NA | 2  | 0 | Low-quality    | Genome-fragment | 3.28  | 0 |
| S17_extracted_k141_65846  | 1160   | No | NA | 0  | 2 | Not-determined | Genome-fragment | NA    | 0 |
| S17_extracted_k141_29319  | 1088   | No | NA | 0  | 3 | Not-determined | Genome-fragment | NA    | 0 |
| S17_extracted_k141_29370  | 1967   | No | NA | 0  | 0 | Not-determined | Genome-fragment | NA    | 0 |
| S17_extracted_k141_65895  | 3810   | No | NA | 0  | 3 | Not-determined | Genome-fragment | NA    | 0 |
| S17_vs_k141_2141[full]    | 1031   | No | NA | 0  | 0 | Low-quality    | Genome-fragment | 1.53  | 0 |
| S17_vs_k141_17471[full]   | 1031   | No | NA | 0  | 0 | Low-quality    | Genome-fragment | 0.76  | 0 |
| S17_extracted_k141_95856  | 2648   | No | NA | 0  | 2 | Not-determined | Genome-fragment | NA    | 0 |
| S17_extracted_k141_176976 | 2829   | No | NA | 0  | 2 | Not-determined | Genome-fragment | NA    | 0 |
| S17_extracted_k141_29447  | 3467   | No | NA | 0  | 2 | Not-determined | Genome-fragment | NA    | 0 |
| S9_vs_k141_48669[full]    | 1031   | No | NA | 0  | 0 | Low-quality    | Genome-fragment | 2.29  | 0 |
| S17_extracted_k141_88604  | 1197   | No | NA | 0  | 1 | Not-determined | Genome-fragment | NA    | 0 |
| S17_extracted_k141_95918  | 3279   | No | NA | 0  | 4 | Not-determined | Genome-fragment | NA    | 0 |
| S17_extracted_k141_177070 | 1599   | No | NA | 0  | 1 | Not-determined | Genome-fragment | NA    | 0 |
| S17_extracted_k141_177088 | 1172   | No | NA | 0  | 0 | Not-determined | Genome-fragment | NA    | 0 |
| S11_extracted_k141_95962  | 1031   | No | NA | 0  | 0 | Low-quality    | Genome-fragment | 0.3   | 0 |
| S17_extracted_k141_29528  | 10475  | No | NA | 0  | 0 | Not-determined | Genome-fragment | NA    | 0 |
| S17_extracted_k141_29533  | 4147   | No | NA | 0  | 1 | Not-determined | Genome-fragment | NA    | 0 |
| S17_extracted_k141_177147 | 1105   | No | NA | 0  | 0 | Not-determined | Genome-fragment | NA    | 0 |
| S14_vs_k141_34526[full]   | 1031   | No | NA | 0  | 0 | Low-quality    | Genome-fragment | 2.44  | 0 |
| S1_vs_k141_102446[full]   | 1031   | No | NA | 0  | 0 | Low-quality    | Genome-fragment | 0.63  | 0 |
| S17_extracted_k141_177178 | 3265   | No | NA | 0  | 2 | Not-determined | Genome-fragment | NA    | 0 |
| S17_extracted_k141_177183 | 1046   | No | NA | 0  | 2 | Not-determined | Genome-fragment | NA    | 0 |
| S3_extracted_k141_88430   | 1031   | No | NA | 1  | 0 | Low-quality    | Genome-fragment | 2.79  | 0 |
| S17_extracted_k141_177197 | 53491  | No | NA | 12 | 0 | Complete       | High-quality    | 100   | 0 |
| S17_extracted_k141_177198 | 60033  | No | NA | 44 | 0 | Complete       | High-quality    | 100   | 0 |
| S17_extracted_k141_177200 | 36624  | No | NA | 10 | 1 | Complete       | High-quality    | 100   | 0 |
| S17_extracted_k141_66356  | 1042   | No | NA | 0  | 1 | Not-determined | Genome-fragment | NA    | 0 |
| S17_extracted_k141_66357  | 1110   | No | NA | 0  | 0 | Not-determined | Genome-fragment | NA    | 0 |
| S17_extracted_k141_177221 | 3089   | No | NA | 0  | 0 | Not-determined | Genome-fragment | NA    | 0 |
| S17_extracted_k141_177254 | 2664   | No | NA | 0  | 1 | Not-determined | Genome-fragment | NA    | 0 |
| S17_vs_k141_15243[full]   | 5390   | No | NA | 0  | 1 | Not-determined | Genome-fragment | NA    | 0 |
| S17_vs_k141_153490[full]  | 2132   | No | NA | 0  | 0 | Not-determined | Genome-fragment | NA    | 0 |
| S17_vs_k141_138036[full]  | 20778  | No | NA | 5  | 0 | High-quality   | High-quality    | 98.12 | 0 |
| S17_vs_k141_178851[full]  | 2732   | No | NA | 0  | 2 | Not-determined | Genome-fragment | NA    | 0 |
| S17_vs_k141_103009[full]  | 4347   | No | NA | 12 | 0 | High-quality   | High-quality    | 100   | 0 |
| S17_vs_k141_169681[full]  | 5594   | No | NA | 0  | 0 | Not-determined | Genome-fragment | NA    | 0 |
| S17_vs_k141_177196[full]  | 38554  | No | NA | 8  | 0 | High-quality   | High-quality    | 96.54 | 0 |
| S17_vs_k141_177201[full]  | 39636  | No | NA | 21 | 0 | High-quality   | High-quality    | 99.91 | 0 |
| S17_vs_k141_177203[full]  | 49241  | No | NA | 29 | 0 | High-quality   | High-quality    | 100   | 0 |
| S17_vs_k141_177210[full]  | 4760   | No | NA | 4  | 0 | High-quality   | High-quality    | 99.66 | 0 |
| S17_vs_k141_66506[full]   | 2430   | No | NA | 0  | 0 | Not-determined | Genome-fragment | NA    | 0 |
| S17_vs_k141_133010[full]  | 4330   | No | NA | 0  | 1 | Not-determined | Genome-fragment | NA    | 0 |
| S17_vs_k141_118249[full]  | 2249   | No | NA | 0  | 1 | Not-determined | Genome-fragment | NA    | 0 |
| S17_vs_k141_29590[full]   | 2096   | No | NA | 0  | 1 | Not-determined | Genome-fragment | NA    | 0 |
| S3_extracted_k141_34431   | 1031   | No | NA | 0  | 0 | Low-quality    | Genome-fragment | 4.71  | 0 |
| S17_vs_k141_125634[full]  | 1315   | No | NA | 0  | 0 | Not-determined | Genome-fragment | NA    | 0 |
| S3_extracted_k141_14196   | 1031   | No | NA | 0  | 0 | Low-quality    | Genome-fragment | 0.56  | 0 |
| S17_vs_k141_125657[full]  | 1246   | No | NA | 0  | 0 | Not-determined | Genome-fragment | NA    | 0 |
| S17_vs_k141_110876[full]  | 2699   | No | NA | 0  | 2 | Not-determined | Genome-fragment | NA    | 0 |
| S17_vs_k141_35091[full]   | 1031   | No | NA | 2  | 0 | Low-quality    | Genome-fragment | 2.78  | 0 |
| S7_vs_101812[full]        | 1031   | No | NA | 0  | 0 | Low-quality    | Genome-fragment | 2.84  | 0 |
| S16_vs_45294[full]        | 1031   | No | NA | 0  | 0 | Low-quality    | Genome-fragment | 2.27  | 0 |
| S17_vs_k141_44366[full]   | 1833   | No | NA | 0  | 0 | Not-determined | Genome-fragment | NA    | 0 |
| S17_vs_k141_110905[full]  | 2324   | No | NA | 0  | 0 | Not-determined | Genome-fragment | NA    | 0 |
| S17_vs_k141_118280[full]  | 2266   | No | NA | 0  | 0 | Not-determined | Genome-fragment | NA    | 0 |
| S17_vs_k141_44386[full]   | 1915   | No | NA | 0  | 2 | Not-determined | Genome-fragment | NA    | 0 |
| S17_vs_k141_162600[full]  | 2860   | No | NA | 0  | 2 | Not-determined | Genome-fragment | NA    | 0 |
| S17_vs_k141_37008[full]   | 2609   | No | NA | 0  | 1 | Not-determined | Genome-fragment | NA    | 0 |
| S16_vs_93228[full]        | 1031   | No | NA | 0  | 0 | Low-quality    | Genome-fragment | 1.79  | 0 |
| S17_vs_k141_118308[full]  | 5224   | No | NA | 0  | 2 | Not-determined | Genome-fragment | NA    | 0 |
| S10_vs_103738[full]       | 1031   | No | NA | 0  | 0 | Low-quality    | Genome-fragment | 1.89  | 0 |
| S12_extracted_k141_166225 | 1031   | No | NA | 0  | 0 | Low-quality    | Genome-fragment | 0.46  | 0 |
| S17_vs_k141_37017[full]   | 2459   | No | NA | 0  | 1 | Not-determined | Genome-fragment | NA    | 0 |
| S17_vs_k141_59208[full]   | 2343   | No | NA | 0  | 2 | Not-determined | Genome-fragment | NA    | 0 |
| S17_vs_k141_133074[full]  | 8311   | No | NA | 0  | 2 | Not-determined | Genome-fragment | NA    | 0 |
| S17_vs_k141_140464[full]  | 1526   | No | NA | 0  | 2 | Not-determined | Genome-fragment | NA    | 0 |
| S12_extracted_k141_163889 | 1031   | No | NA | 2  | 0 | Low-quality    | Genome-fragment | 3.4   | 0 |
| S17_vs_k141_161643[full]  | 1911   | No | NA | 0  | 0 | Not-determined | Genome-fragment | NA    | 0 |
| S8_extracted_k141_177771  | 1031   | No | NA | 0  | 0 | Low-quality    | Genome-fragment | 2.38  | 0 |
| S17_vs_k141_1341[full]    | 2489   | No | NA | 0  | 1 | Not-determined | Genome-fragment | NA    | 0 |
| S17_vs_k141_59236[full]   | 1251   | No | NA | 0  | 1 | Not-determined | Genome-fragment | NA    | 0 |
| S17_vs_k141_518251[full]  | 11791  | No | NA | 0  | 9 | Not-determined | Genome-fragment | NA    | 0 |
| S9_extracted_k141_42856   | 1032   | No | NA | 0  | 0 | Low-quality    | Genome-fragment | 2.08  | 0 |
| S9_vs_k141_356151[full]   | 1032   | No | NA | 1  | 0 | Low-quality    | Genome-fragment | 1.4   | 0 |
| S13_vs_149911[full]       | 1032   | No | NA | 1  | 0 | Low-quality    | Genome-fragment | 21.7  | 0 |
| S14_extracted_k141_77896  | 1032   | No | NA | 0  | 0 | Low-quality    | Genome-fragment | 2.68  | 0 |
| S17_vs_k141_148861[full]  | 1083   | No | NA | 0  | 1 | Not-determined | Genome-fragment | NA    | 0 |
| S14_vs_k141_60220[full]   | 1032   | No | NA | 0  | 0 | Low-quality    | Genome-fragment | 3.6   | 0 |
| S17_vs_k141_22238[full]   | 7215   | No | NA | 0  | 1 | Not-determined | Genome-fragment | NA    | 0 |
| S14_vs_k141_17440[full]   | 1032   | No | NA | 3  | 0 | Low            |                 |       |   |



|                           |          |       |    |    |   |                |                 |                 |    |      |   |
|---------------------------|----------|-------|----|----|---|----------------|-----------------|-----------------|----|------|---|
| S17_vx_k141_148060        | [full]   | 2757  | No | NA | 0 | 2              | Not-determined  | Genome-fragment | NA | 0    | 0 |
| S17_vx_k141_96422         | [full]   | 2373  | No | NA | 0 | 1              | Not-determined  | Genome-fragment | NA | 0    | 0 |
| S8_extracted_k141_49818   |          | 1032  | No | NA | 0 | 0              | Low-quality     | Genome-fragment | NA | 2.23 | 0 |
| S17_vx_k141_155407        | [full]   | 1437  | No | NA | 0 | 0              | Not-determined  | Genome-fragment | NA | 0    | 0 |
| S8_extracted_k141_188970  |          | 1032  | No | NA | 1 | 0              | Low-quality     | Genome-fragment | NA | 2.63 | 0 |
| S8_vx_k141_122003         | [H2gene] | 1032  | No | NA | 2 | 0              | Low-quality     | Genome-fragment | NA | 4.35 | 0 |
| S17_vx_k141_78761         | [H2gene] | 1033  | No | NA | 1 | 0              | Low-quality     | Genome-fragment | NA | 2.53 | 0 |
| S17_vx_k141_88906         | [full]   | 1671  | No | NA | 0 | 2              | Not-determined  | Genome-fragment | NA | 0    | 0 |
| S11_vx_k141_72016         | [full]   | 1033  | No | NA | 0 | 0              | Low-quality     | Genome-fragment | NA | 1.84 | 0 |
| S11_vx_k141_81891         | [full]   | 1033  | No | NA | 2 | 0              | Low-quality     | Genome-fragment | NA | 2.06 | 0 |
| S17_vx_k141_88918         | [full]   | 2262  | No | NA | 0 | 2              | Not-determined  | Genome-fragment | NA | 0    | 0 |
| S17_vx_k141_37289         | [full]   | 24637 | No | NA | 0 | 8              | Not-determined  | Genome-fragment | NA | 0    | 0 |
| S14_vx_k141_111590        | [full]   | 1033  | No | NA | 4 | 0              | Low-quality     | Genome-fragment | NA | 3.4  | 0 |
| S14_vx_k141_54425         | [full]   | 1033  | No | NA | 1 | 0              | Low-quality     | Genome-fragment | NA | 1.37 | 0 |
| S17_vx_k141_125870        | [full]   | 2208  | No | NA | 0 | 1              | Not-determined  | Genome-fragment | NA | 4.7  | 0 |
| S7_extracted_70704        |          | 1033  | No | NA | 0 | 0              | Low-quality     | Genome-fragment | NA | 2.51 | 0 |
| S7_vx_90197               | [full]   | 1033  | No | NA | 1 | 0              | Low-quality     | Genome-fragment | NA | 2.44 | 0 |
| S12_vx_k141_184547        | [H2gene] | 1368  | No | NA | 0 | 1              | Not-determined  | Genome-fragment | NA | 0    | 0 |
| S17_vx_k141_118515        | [full]   | 1033  | No | NA | 0 | 0              | Low-quality     | Genome-fragment | NA | 1.17 | 0 |
| S15_vx_42295              | [full]   | 1476  | No | NA | 0 | 2              | Not-determined  | Genome-fragment | NA | 0    | 0 |
| S17_vx_k141_96476         | [full]   | 3315  | No | NA | 0 | 0              | Not-determined  | Genome-fragment | NA | 0    | 0 |
| S17_vx_k141_111014        | [full]   | 3779  | No | NA | 0 | 0              | Not-determined  | Genome-fragment | NA | 0    | 0 |
| S17_vx_k141_111016        | [full]   | 1300  | No | NA | 0 | 0              | Not-determined  | Genome-fragment | NA | 0    | 0 |
| S15_vx_25639              | [H2gene] | 1033  | No | NA | 1 | 0              | Low-quality     | Genome-fragment | NA | 2.5  | 0 |
| S17_vx_k141_103838        | [full]   | 3215  | No | NA | 0 | 1              | Not-determined  | Genome-fragment | NA | 0    | 0 |
| S17_vx_k141_74215         | [full]   | 4938  | No | NA | 0 | 1              | Not-determined  | Genome-fragment | NA | 0    | 0 |
| S4_extracted_18796        |          | 1033  | No | NA | 3 | 0              | Low-quality     | Genome-fragment | NA | 3.39 | 0 |
| S17_vx_k141_264           | [full]   | 3583  | No | NA | 2 | Not-determined | Genome-fragment | NA              | 0  | 0    |   |
| S17_vx_k141_44697         | [full]   | 4440  | No | NA | 0 | 2              | Not-determined  | Genome-fragment | NA | 0    | 0 |
| S17_vx_k141_22356         | [full]   | 1661  | No | NA | 0 | 1              | Not-determined  | Genome-fragment | NA | 0    | 0 |
| S17_vx_k141_148164        | [full]   | 1279  | No | NA | 2 | Not-determined | Genome-fragment | NA              | 0  | 0    |   |
| S17_vx_k141_30007         | [full]   | 15806 | No | NA | 0 | 9              | Not-determined  | Genome-fragment | NA | 0    | 0 |
| S17_vx_k141_74255         | [full]   | 1745  | No | NA | 0 | 2              | Not-determined  | Genome-fragment | NA | 0    | 0 |
| S4_extracted_27105        |          | 1033  | No | NA | 0 | 0              | Low-quality     | Genome-fragment | NA | 2.23 | 0 |
| S6_vx_k141_17911          | [full]   | 1033  | No | NA | 0 | 0              | Low-quality     | Genome-fragment | NA | 2.03 | 0 |
| S6_vx_k141_8807           | [H2gene] | 1033  | No | NA | 1 | 0              | Low-quality     | Genome-fragment | NA | 2.15 | 0 |
| S17_vx_k141_66802         | [full]   | 2597  | No | NA | 0 | 3              | Not-determined  | Genome-fragment | NA | 0    | 0 |
| S17_vx_k141_96529         | [full]   | 5117  | No | NA | 0 | 4              | Not-determined  | Genome-fragment | NA | 0    | 0 |
| S17_vx_k141_170279        | [full]   | 4897  | No | NA | 0 | 1              | Not-determined  | Genome-fragment | NA | 0    | 0 |
| S6_vx_k141_11697          | [H2gene] | 1033  | No | NA | 0 | 0              | Low-quality     | Genome-fragment | NA | 1.54 | 0 |
| S8_vx_k141_560            | [full]   | 1033  | No | NA | 0 | 0              | Low-quality     | Genome-fragment | NA | 2.19 | 0 |
| S17_extracted_k141_13152  |          | 1034  | No | NA | 0 | 2              | Low-quality     | Genome-fragment | NA | 0.47 | 0 |
| S17_vx_k141_170284        | [full]   | 3856  | No | NA | 0 | 3              | Not-determined  | Genome-fragment | NA | 0    | 0 |
| S17_vx_k141_7807          | [full]   | 2117  | No | NA | 0 | 2              | Not-determined  | Genome-fragment | NA | 0    | 0 |
| S17_vx_k141_88942         | [full]   | 3207  | No | NA | 1 | 3              | Not-determined  | Genome-fragment | NA | 0    | 0 |
| S17_vx_k141_137428        | [full]   | 1034  | No | NA | 0 | 0              | Low-quality     | Genome-fragment | NA | 0.19 | 0 |
| S17_vx_k141_118579        | [full]   | 5765  | No | NA | 0 | 4              | Not-determined  | Genome-fragment | NA | 0    | 0 |
| S17_vx_k141_139021        | [full]   | 1034  | No | NA | 0 | 0              | Low-quality     | Genome-fragment | NA | 2.25 | 0 |
| S17_vx_k141_162880        | [full]   | 13996 | No | NA | 0 | 1              | Not-determined  | Genome-fragment | NA | 0    | 0 |
| S17_vx_k141_66827         | [full]   | 12355 | No | NA | 0 | 9              | Not-determined  | Genome-fragment | NA | 0    | 0 |
| S12_extracted_102950      |          | 1034  | No | NA | 0 | 2              | Low-quality     | Genome-fragment | NA | 1.65 | 0 |
| S17_vx_k141_133375        | [full]   | 1453  | No | NA | 1 | 2              | Not-determined  | Genome-fragment | NA | 0    | 0 |
| S17_vx_k141_111162        | [full]   | 1272  | No | NA | 0 | 1              | Not-determined  | Genome-fragment | NA | 0    | 0 |
| S5_vx_k141_97065          | [H2gene] | 1034  | No | NA | 0 | 0              | Low-quality     | Genome-fragment | NA | 2.87 | 0 |
| S7_vx_109279              | [full]   | 1034  | No | NA | 0 | 0              | Low-quality     | Genome-fragment | NA | 2.66 | 0 |
| S17_vx_k141_59625         | [full]   | 1898  | No | NA | 0 | 0              | Not-determined  | Genome-fragment | NA | 0    | 0 |
| S17_vx_k141_88979         | [full]   | 5535  | No | NA | 0 | 3              | Not-determined  | Genome-fragment | NA | 0    | 0 |
| S17_vx_k141_59631         | [full]   | 5677  | No | NA | 0 | 4              | Not-determined  | Genome-fragment | NA | 0    | 0 |
| S17_vx_k141_81521         | [full]   | 1398  | No | NA | 0 | 1              | Not-determined  | Genome-fragment | NA | 0    | 0 |
| S16_extracted_44689       |          | 1034  | No | NA | 0 | 0              | Low-quality     | Genome-fragment | NA | 1.47 | 0 |
| S17_vx_k141_81545         | [full]   | 1235  | No | NA | 0 | 0              | Not-determined  | Genome-fragment | NA | 0    | 0 |
| S17_vx_k141_37491         | [full]   | 1230  | No | NA | 0 | 2              | Not-determined  | Genome-fragment | NA | 0    | 0 |
| S17_vx_k141_89008         | [full]   | 1083  | No | NA | 0 | 0              | Not-determined  | Genome-fragment | NA | 0    | 0 |
| S17_vx_k141_15131         | [full]   | 9190  | No | NA | 4 | 4              | Not-determined  | Genome-fragment | NA | 0    | 0 |
| S17_vx_k141_388           | [full]   | 5427  | No | NA | 0 | 4              | Not-determined  | Genome-fragment | NA | 0    | 0 |
| S10_vx_57582              | [H2gene] | 1034  | No | NA | 1 | 0              | Low-quality     | Genome-fragment | NA | 1.91 | 0 |
| S17_vx_k141_170328        | [full]   | 1587  | No | NA | 0 | 0              | Not-determined  | Genome-fragment | NA | 0    | 0 |
| S10_vx_50514              | [H2gene] | 1034  | No | NA | 0 | 0              | Low-quality     | Genome-fragment | NA | 1.96 | 0 |
| S17_vx_k141_89026         | [full]   | 1591  | No | NA | 0 | 1              | Not-determined  | Genome-fragment | NA | 0    | 0 |
| S17_vx_k141_426           | [full]   | 1360  | No | NA | 0 | 2              | Not-determined  | Genome-fragment | NA | 0    | 0 |
| S17_vx_k141_15165         | [full]   | 4870  | No | NA | 0 | 1              | Not-determined  | Genome-fragment | NA | 0    | 0 |
| S17_vx_k141_59674         | [full]   | 2207  | No | NA | 0 | 0              | Not-determined  | Genome-fragment | NA | 0    | 0 |
| S12_vx_k141_68140         | [full]   | 1034  | No | NA | 0 | 1              | Low-quality     | Genome-fragment | NA | 1.46 | 0 |
| S17_vx_k141_59678         | [full]   | 1981  | No | NA | 0 | 0              | Not-determined  | Genome-fragment | NA | 0    | 0 |
| S17_vx_k141_170343        | [full]   | 2585  | No | NA | 0 | 2              | Not-determined  | Genome-fragment | NA | 0    | 0 |
| S12_extracted_k141_4190   |          | 1034  | No | NA | 2 | 0              | Low-quality     | Genome-fragment | NA | 3.41 | 0 |
| S8_extracted_k141_75293   |          | 1034  | No | NA | 0 | 0              | Low-quality     | Genome-fragment | NA | 1.9  | 0 |
| S17_vx_k141_30134         | [full]   | 3887  | No | NA | 1 | 2              | Not-determined  | Genome-fragment | NA | 0    | 0 |
| S17_vx_k141_118719        | [full]   | 4658  | No | NA | 0 | 3              | Not-determined  | Genome-fragment | NA | 0    | 0 |
| S11_extracted_k141_8713   |          | 1035  | No | NA | 0 | 0              | Low-quality     | Genome-fragment | NA | 1.82 | 0 |
| S17_vx_k141_81558         | [full]   | 1738  | No | NA | 0 | 0              | Not-determined  | Genome-fragment | NA | 0    | 0 |
| S17_vx_k141_37565         | [full]   | 1305  | No | NA | 0 | 2              | Not-determined  | Genome-fragment | NA | 0    | 0 |
| S17_vx_k141_111224        | [full]   | 1023  | No | NA | 0 | 1              | Not-determined  | Genome-fragment | NA | 0    | 0 |
| S11_vx_k141_53263         | [full]   | 1035  | No | NA | 0 | 0              | Low-quality     | Genome-fragment | NA | 2.65 | 0 |
| S13_vx_7485               | [full]   | 1035  | No | NA | 0 | 1              | Low-quality     | Genome-fragment | NA | 1.06 | 0 |
| S17_vx_k141_22540         | [full]   | 3282  | No | NA | 0 | 4              | Not-determined  | Genome-fragment | NA | 0    | 0 |
| S13_vx_17170              | [full]   | 1035  | No | NA | 0 | 0              | Low-quality     | Genome-fragment | NA | 2.41 | 0 |
| S17_vx_k141_37608         | [full]   | 1414  | No | NA | 0 | 1              | Not-determined  | Genome-fragment | NA | 0    | 0 |
| S14_extracted_k141_88184  |          | 1035  | No | NA | 2 | 0              | Low-quality     | Genome-fragment | NA | 3.41 | 0 |
| S17_vx_k141_37615         | [full]   | 1415  | No | NA | 0 | 0              | Not-determined  | Genome-fragment | NA | 0    | 0 |
| S17_vx_k141_30203         | [full]   | 2878  | No | NA | 0 | 0              | Not-determined  | Genome-fragment | NA | 0    | 0 |
| S14_extracted_k141_82427  |          | 1035  | No | NA | 0 | 0              | Low-quality     | Genome-fragment | NA | 1.73 | 0 |
| S5_extracted_k141_93770   |          | 1035  | No | NA | 0 | 0              | Low-quality     | Genome-fragment | NA | 1.14 | 0 |
| S17_vx_k141_59724         | [full]   | 1424  | No | NA | 0 | 0              | Not-determined  | Genome-fragment | NA | 0    | 0 |
| S17_vx_k141_22563         | [full]   | 1319  | No | NA | 0 | 1              | Not-determined  | Genome-fragment | NA | 0    | 0 |
| S17_vx_k141_170402        | [full]   | 8713  | No | NA | 0 | 4              | Not-determined  | Genome-fragment | NA | 0    | 0 |
| S17_vx_k141_133494        | [full]   | 8990  | No | NA | 0 | 3              | Not-determined  | Genome-fragment | NA | 0    | 0 |
| S5_vx_k141_113633         | [full]   | 1035  | No | NA | 0 | 0              | Low-quality     | Genome-fragment | NA | 2.15 | 0 |
| S17_vx_k141_74485         | [full]   | 1713  | No | NA | 0 | 0              | Not-determined  | Genome-fragment | NA | 0    | 0 |
| S7_extracted_82460        |          | 1035  | No | NA | 0 | 0              | Low-quality     | Genome-fragment | NA | 2.43 | 0 |
| S17_vx_k141_53238         | [full]   | 1512  | No | NA | 2 | 0              | Not-determined  | Genome-fragment | NA | 0    | 0 |
| S7_vx_41805               | [full]   | 1035  | No | NA | 2 | 0              | Low-quality     | Genome-fragment | NA | 2.4  | 0 |
| S16_vx_59444              | [full]   | 1035  | No | NA | 0 | 0              | Low-quality     | Genome-fragment | NA | 1.69 | 0 |
| S17_vx_k141_15274         | [full]   | 3396  | No | NA | 0 | 1              | Not-determined  | Genome-fragment | NA | 0    | 0 |
| S17_vx_k141_118812        | [full]   | 1821  | No | NA | 0 | 2              | Not-determined  | Genome-fragment | NA | 0    | 0 |
| S17_vx_k141_74490         | [full]   | 4592  | No | NA | 0 | 1              | Not-determined  | Genome-fragment | NA | 0    | 0 |
| S16_vx_115097             | [full]   | 1035  | No | NA | 2 | 0              | Low-quality     | Genome-fragment | NA | 2.2  | 0 |
| S12_extracted_k141_157587 |          | 1035  | No | NA | 0 | 0              | Low-quality     | Genome-fragment | NA | 1.73 | 0 |
| S17_vx_k141_59727         | [full]   | 1099  | No | NA | 0 | 0              | Not-determined  | Genome-fragment | NA | 0    | 0 |
| S17_vx_k141_126079        | [full]   | 3072  | No | NA | 0 | 0              | Not-determined  | Genome-fragment | NA | 0    | 0 |
| S12_vx_k141_31761         | [full]   | 1035  | No | NA | 0 | 0              | Low-quality     | Genome-fragment | NA | 1.85 | 0 |
| S12_vx_k141_33397         | [full]   | 1035  | No | NA | 0 | 1              | Low-quality     | Genome-fragment | NA | 1.63 | 0 |
| S12_vx_k141_36721         | [full]   | 1035  | No | NA | 0 | 2              | Low-quality     | Genome-fragment | NA | 0.61 | 0 |
| S8_vx_k141_183136         | [full]   | 1035  | No | NA | 1 | 0              | Low-quality     | Genome-fragment | NA | 1.35 | 0 |
| S8_vx_k141_204171         | [full]   | 1035  | No | NA | 0 | 0              | Low-quality     | Genome-fragment | NA | 1.21 | 0 |
| S17_vx_k141_59733         | [full]   | 2405  | No | NA | 0 | 1              | Not-determined  | Genome-fragment | NA | 0    | 0 |
| S17_vx_k141_44934         | [full]   | 1045  | No | NA | 0 | 0              | Not-determined  | Genome-fragment | NA | 0    | 0 |
| S17_vx_k141_37695         | [full]   | 1460  | No | NA | 0 | 1              | Not-determined  | Genome-fragment | NA | 0    | 0 |
| S17_extracted_k141_146837 |          | 1036  | No | NA | 0 | 0              | Low-quality     | Genome-fragment | NA | 0.61 | 0 |
| S17_vx_k141_59854         | [H2gene] | 1036  | No | NA | 2 | 0              | Low-quality     | Genome-fragment | NA | 1.13 | 0 |
| S17_vx_k141_136112        | [full]   | 15658 | No | NA | 6 | Not-determined | Genome-fragment | NA              | 0  | 0    |   |
| S17_vx_k141_59749         | [full]   | 2986  | No | NA | 0 | 2              | Not-determined  | Genome-fragment | NA | 0    | 0 |
| S17_vx_k141_118864        | [full]   | 2914  | No | NA | 0 | 1              | Not-determined  | Genome-fragment | NA | 0    | 0 |
| S17_vx_k141_111354        | [full]   | 36003 | No | NA | 0 | 11             | Not-determined  | Genome-fragment | NA | 0    | 0 |
| S17_vx_k141_96574         | [full]   | 1246  | No | NA | 0 | 1              | Not-determined  | Genome-fragment | NA | 0    | 0 |
| S17_vx_k141_104163        | [full]   | 2182  | No | NA | 0 | 1              | Not-determined  | Genome-fragment | NA | 0    | 0 |
| S11_extracted_k141_63694  |          | 1036  | No | NA | 0 | 0              | Low-quality     | Genome-fragment | NA | 2.37 | 0 |
| S17_vx_k141_52426         | [full]</ |       |    |    |   |                |                 |                 |    |      |   |



|                            |       |    |    |    |    |                |                 |       |   |
|----------------------------|-------|----|----|----|----|----------------|-----------------|-------|---|
| S14_extracted_k141_42593   | 1037  | No | NA | 0  | 1  | Low-quality    | Genome-fragment | 0.77  | 0 |
| S1_extracted_k141_36305    | 1037  | No | NA | 1  | 0  | Low-quality    | Genome-fragment | 0.72  | 0 |
| S17_vs_k141_22742  full    | 1070  | No | NA | 0  | 0  | Not-determined | Genome-fragment | NA    | 0 |
| S1_vs_k141_113507  full    | 1037  | No | NA | 0  | 0  | Low-quality    | Genome-fragment | 2.43  | 0 |
| S17_vs_k141_89339  full    | 5239  | No | NA | 0  | 2  | Not-determined | Genome-fragment | NA    | 0 |
| S1_vs_k141_141024  full    | 1037  | No | NA | 0  | 0  | Low-quality    | Genome-fragment | 2.63  | 0 |
| S1_vs_k141_51460  full     | 1037  | No | NA | 1  | 0  | Low-quality    | Genome-fragment | 2.67  | 0 |
| S17_vs_k141_67155  full    | 1462  | No | NA | 0  | 1  | Not-determined | Genome-fragment | NA    | 0 |
| S17_vs_k141_115139  full   | 2041  | No | NA | 0  | 1  | Not-determined | Genome-fragment | NA    | 0 |
| S17_vs_k141_170747  full   | 3684  | No | NA | 0  | 2  | Not-determined | Genome-fragment | NA    | 0 |
| S17_vs_k141_104488  full   | 3402  | No | NA | 0  | 2  | Not-determined | Genome-fragment | NA    | 0 |
| S5_vs_k141_51272   H2gene  | 1037  | No | NA | 1  | 0  | Low-quality    | Genome-fragment | 3.02  | 0 |
| S7_extracted_2254          | 1037  | No | NA | 0  | 0  | Low-quality    | Genome-fragment | 1.98  | 0 |
| S17_vs_k141_170767  full   | 1966  | No | NA | 0  | 0  | Not-determined | Genome-fragment | NA    | 0 |
| S17_vs_k141_163359  full   | 1184  | No | NA | 0  | 1  | Not-determined | Genome-fragment | NA    | 0 |
| S17_vs_k141_451151  full   | 4011  | No | NA | 1  | 0  | Not-determined | Genome-fragment | NA    | 0 |
| S7_extracted_19799         | 1037  | No | NA | 2  | 0  | Low-quality    | Genome-fragment | 2.35  | 0 |
| S17_vs_k141_148714  full   | 2233  | No | NA | 0  | 2  | Not-determined | Genome-fragment | NA    | 0 |
| S17_vs_k141_104552  full   | 2852  | No | NA | 0  | 1  | Not-determined | Genome-fragment | NA    | 0 |
| S17_vs_k141_89379  full    | 1801  | No | NA | 0  | 0  | Not-determined | Genome-fragment | NA    | 0 |
| S17_vs_k141_89384  full    | 1661  | No | NA | 0  | 1  | Not-determined | Genome-fragment | NA    | 0 |
| S17_vs_k141_8288  full     | 3779  | No | NA | 0  | 3  | Not-determined | Genome-fragment | NA    | 0 |
| S10_vs_14817  full         | 1037  | No | NA | 1  | 0  | Low-quality    | Genome-fragment | 2.39  | 0 |
| S17_vs_k141_163418  full   | 1331  | No | NA | 0  | 0  | Not-determined | Genome-fragment | NA    | 0 |
| S17_vs_k141_170830  full   | 1721  | No | NA | 0  | 1  | Not-determined | Genome-fragment | NA    | 0 |
| S12_vs_k141_24331  full    | 1037  | No | NA | 1  | 0  | Low-quality    | Genome-fragment | 2.48  | 0 |
| S12_vs_k141_3566  full     | 1037  | No | NA | 1  | 0  | Low-quality    | Genome-fragment | 2.2   | 0 |
| S17_vs_k141_170840  full   | 1732  | No | NA | 0  | 1  | Not-determined | Genome-fragment | NA    | 0 |
| S17_vs_k141_38033  full    | 2229  | No | NA | 0  | 2  | Not-determined | Genome-fragment | NA    | 0 |
| S17_vs_k141_96831  full    | 4298  | No | NA | 0  | 4  | Not-determined | Genome-fragment | NA    | 0 |
| S17_vs_k141_104572  full   | 2681  | No | NA | 0  | 1  | Not-determined | Genome-fragment | NA    | 0 |
| S17_vs_k141_126346  full   | 1681  | No | NA | 0  | 1  | Not-determined | Genome-fragment | NA    | 0 |
| S2_vs_k141_11866  full     | 1037  | No | NA | 1  | 0  | Low-quality    | Genome-fragment | 2.53  | 0 |
| S17_vs_k141_45179  full    | 4107  | No | NA | 0  | 3  | Not-determined | Genome-fragment | NA    | 0 |
| S6_extracted_k141_17310    | 1037  | No | NA | 1  | 0  | Low-quality    | Genome-fragment | 2.69  | 0 |
| S8_extracted_k141_61347    | 1037  | No | NA | 1  | 0  | Low-quality    | Genome-fragment | 0.65  | 0 |
| S8_extracted_k141_28656    | 1037  | No | NA | 0  | 0  | Low-quality    | Genome-fragment | 2.21  | 0 |
| S8_extracted_k141_155679   | 1037  | No | NA | 1  | 0  | Low-quality    | Genome-fragment | 2.04  | 0 |
| S8_vs_k141_38085  full     | 1037  | No | NA | 0  | 0  | Low-quality    | Genome-fragment | 2.74  | 0 |
| S9_vs_k141_68053  full     | 1038  | No | NA | 0  | 0  | Low-quality    | Genome-fragment | 2.74  | 0 |
| S9_vs_k141_68274   H2gene  | 1038  | No | NA | 1  | 0  | Low-quality    | Genome-fragment | 2.37  | 0 |
| S17_vs_k141_52789  full    | 2778  | No | NA | 0  | 0  | Not-determined | Genome-fragment | NA    | 0 |
| S17_vs_k141_148834  full   | 1784  | No | NA | 0  | 0  | Not-determined | Genome-fragment | NA    | 0 |
| S17_vs_k141_52806  full    | 2949  | No | NA | 0  | 1  | Not-determined | Genome-fragment | NA    | 0 |
| S17_vs_k141_111618  full   | 3060  | No | NA | 0  | 0  | Not-determined | Genome-fragment | NA    | 0 |
| S17_vs_k141_133785  full   | 3328  | No | NA | 0  | 4  | Not-determined | Genome-fragment | NA    | 0 |
| S17_vs_k141_67359  full    | 1056  | No | NA | 0  | 0  | Not-determined | Genome-fragment | NA    | 0 |
| S17_vs_k141_96922  full    | 4978  | No | NA | 0  | 6  | Not-determined | Genome-fragment | NA    | 0 |
| S11_vs_k141_68451  full    | 1058  | No | NA | 0  | 0  | Low-quality    | Genome-fragment | 2.28  | 0 |
| S17_vs_k141_67361  full    | 3174  | No | NA | 0  | 3  | Not-determined | Genome-fragment | NA    | 0 |
| S17_vs_k141_52838  full    | 1603  | No | NA | 0  | 0  | Not-determined | Genome-fragment | NA    | 0 |
| S11_vs_k141_95781  full    | 1058  | No | NA | 0  | 0  | Low-quality    | Genome-fragment | 1.47  | 0 |
| S17_vs_k141_81899  full    | 1971  | No | NA | 0  | 3  | Not-determined | Genome-fragment | NA    | 0 |
| S17_vs_k141_22912  full    | 2795  | No | NA | 0  | 0  | Not-determined | Genome-fragment | NA    | 0 |
| S17_vs_k141_111663  full   | 1316  | No | NA | 0  | 1  | Not-determined | Genome-fragment | NA    | 0 |
| S13_vs_110212  full        | 1038  | No | NA | 3  | 0  | Low-quality    | Genome-fragment | 2.7   | 0 |
| S14_extracted_k141_31515   | 1038  | No | NA | 4  | 0  | Low-quality    | Genome-fragment | 3.43  | 0 |
| S17_vs_k141_30648  full    | 2061  | No | NA | 0  | 0  | Not-determined | Genome-fragment | NA    | 0 |
| S17_vs_k141_84241  full    | 4529  | No | NA | 0  | 2  | Not-determined | Genome-fragment | NA    | 0 |
| S17_vs_k141_84241  full    | 4529  | No | NA | 0  | 2  | Not-determined | Genome-fragment | NA    | 0 |
| S1_extracted_k141_119134   | 1038  | No | NA | 2  | 0  | Low-quality    | Genome-fragment | 1.52  | 0 |
| S1_vs_k141_155040   H2gene | 1038  | No | NA | 1  | 0  | Low-quality    | Genome-fragment | 2.22  | 0 |
| S3_extracted_k141_69325    | 1038  | No | NA | 1  | 0  | Low-quality    | Genome-fragment | 1.06  | 0 |
| S17_vs_k141_45336  full    | 1927  | No | NA | 0  | 2  | Not-determined | Genome-fragment | NA    | 0 |
| S16_vs_92419  full         | 1038  | No | NA | 1  | 0  | Low-quality    | Genome-fragment | 2.64  | 0 |
| S17_vs_k141_594  full      | 18858 | No | NA | 11 | 1  | Not-determined | Genome-fragment | NA    | 0 |
| S12_vs_k141_155264  full   | 1038  | No | NA | 1  | 0  | Low-quality    | Genome-fragment | 2.28  | 0 |
| S17_vs_k141_141371  full   | 1398  | No | NA | 0  | 0  | Not-determined | Genome-fragment | NA    | 0 |
| S15_extracted_24635        | 1038  | No | NA | 0  | 1  | Low-quality    | Genome-fragment | 0.45  | 0 |
| S8_vs_k141_203659  full    | 1038  | No | NA | 0  | 0  | Low-quality    | Genome-fragment | 2.19  | 0 |
| S17_vs_k141_52890  full    | 60210 | No | NA | 0  | 14 | Medium-quality | Genome-fragment | 63.54 | 0 |
| S17_vs_k141_81929  full    | 7371  | No | NA | 1  | 2  | Not-determined | Genome-fragment | NA    | 0 |
| S8_vs_k141_25231  full     | 1038  | No | NA | 0  | 0  | Low-quality    | Genome-fragment | 2.19  | 0 |
| S17_vs_k141_119269  full   | 5736  | No | NA | 0  | 1  | Not-determined | Genome-fragment | NA    | 0 |
| S17_vs_k141_156356  full   | 6580  | No | NA | 0  | 1  | Not-determined | Genome-fragment | NA    | 0 |
| S17_vs_k141_84971  full    | 2292  | No | NA | 0  | 0  | Not-determined | Genome-fragment | NA    | 0 |
| S17_vs_k141_11739  full    | 1176  | No | NA | 0  | 0  | Not-determined | Genome-fragment | NA    | 0 |
| S17_vs_k141_81943  full    | 2051  | No | NA | 0  | 1  | Not-determined | Genome-fragment | NA    | 0 |
| S17_vs_k141_96991  full    | 2727  | No | NA | 0  | 2  | Not-determined | Genome-fragment | NA    | 0 |
| S14_extracted_k141_77244   | 1039  | No | NA | 0  | 0  | Low-quality    | Genome-fragment | 3.11  | 0 |
| S14_extracted_k141_21771   | 1039  | No | NA | 0  | 1  | Low-quality    | Genome-fragment | 0.29  | 0 |
| S14_vs_k141_100590  full   | 1039  | No | NA | 1  | 0  | Low-quality    | Genome-fragment | 2.69  | 0 |
| S3_extracted_k141_30189    | 1039  | No | NA | 0  | 0  | Low-quality    | Genome-fragment | 1.78  | 0 |
| S17_vs_k141_38278  full    | 1134  | No | NA | 0  | 0  | Not-determined | Genome-fragment | NA    | 0 |
| S17_vs_k141_104812  full   | 1030  | No | NA | 0  | 1  | Not-determined | Genome-fragment | NA    | 0 |
| S17_vs_k141_81960  full    | 4779  | No | NA | 0  | 0  | Not-determined | Genome-fragment | NA    | 0 |
| S17_vs_k141_156425  full   | 1620  | No | NA | 0  | 2  | Not-determined | Genome-fragment | NA    | 0 |
| S17_vs_k141_104840  full   | 2046  | No | NA | 0  | 0  | Not-determined | Genome-fragment | NA    | 0 |
| S17_vs_k141_97048  full    | 1478  | No | NA | 0  | 0  | Not-determined | Genome-fragment | NA    | 0 |
| S17_vs_k141_10501  full    | 3656  | No | NA | 0  | 1  | Not-determined | Genome-fragment | NA    | 0 |
| S17_vs_k141_104847  full   | 1258  | No | NA | 0  | 0  | Not-determined | Genome-fragment | NA    | 0 |
| S17_vs_k141_113843  full   | 1471  | No | NA | 0  | 0  | Not-determined | Genome-fragment | NA    | 0 |
| S17_vs_k141_163659  full   | 1883  | No | NA | 0  | 1  | Not-determined | Genome-fragment | NA    | 0 |
| S5_extracted_k141_68264    | 1039  | No | NA | 2  | 0  | Low-quality    | Genome-fragment | 3.01  | 0 |
| S17_vs_k141_111855  full   | 3234  | No | NA | 0  | 0  | Not-determined | Genome-fragment | NA    | 0 |
| S17_vs_k141_119353  full   | 1123  | No | NA | 0  | 0  | Not-determined | Genome-fragment | NA    | 0 |
| S5_vs_k141_69955   H2gene  | 1039  | No | NA | 1  | 0  | Low-quality    | Genome-fragment | 0.93  | 0 |
| S17_vs_k141_119367  full   | 1485  | No | NA | 0  | 0  | Not-determined | Genome-fragment | NA    | 0 |
| S16_extracted_19515        | 1039  | No | NA | 0  | 0  | Low-quality    | Genome-fragment | 2.45  | 0 |
| S16_vs_24991  full         | 1039  | No | NA | 0  | 0  | Low-quality    | Genome-fragment | 0.68  | 0 |
| S17_vs_k141_163680  full   | 1254  | No | NA | 0  | 0  | Not-determined | Genome-fragment | NA    | 0 |
| S17_vs_k141_10871  full    | 9719  | No | NA | 0  | 4  | Not-determined | Genome-fragment | NA    | 0 |
| S17_vs_k141_118791  full   | 2270  | No | NA | 0  | 0  | Not-determined | Genome-fragment | NA    | 0 |
| S17_vs_k141_8631  full     | 3209  | No | NA | 0  | 0  | Not-determined | Genome-fragment | NA    | 0 |
| S17_vs_k141_149144  full   | 4107  | No | NA | 0  | 2  | Not-determined | Genome-fragment | NA    | 0 |
| S17_vs_k141_111889  full   | 2311  | No | NA | 0  | 0  | Not-determined | Genome-fragment | NA    | 0 |
| S17_vs_k141_67579  full    | 1260  | No | NA | 0  | 0  | Not-determined | Genome-fragment | NA    | 0 |
| S16_vs_93314  full         | 1039  | No | NA | 0  | 0  | Low-quality    | Genome-fragment | 2.52  | 0 |
| S16_vs_24357   H2gene      | 1039  | No | NA | 1  | 0  | Low-quality    | Genome-fragment | 2.37  | 0 |
| S17_vs_k141_171198  full   | 6378  | No | NA | 0  | 5  | Not-determined | Genome-fragment | NA    | 0 |
| S17_vs_k141_60305  full    | 1505  | No | NA | 0  | 1  | Not-determined | Genome-fragment | NA    | 0 |
| S10_vs_42914  full         | 1039  | No | NA | 0  | 0  | Low-quality    | Genome-fragment | 2.17  | 0 |
| S17_vs_k141_171212  full   | 1111  | No | NA | 0  | 0  | Not-determined | Genome-fragment | NA    | 0 |
| S17_vs_k141_53092  full    | 4196  | No | NA | 0  | 4  | Not-determined | Genome-fragment | NA    | 0 |
| S17_vs_k141_38429  full    | 2968  | No | NA | 0  | 0  | Not-determined | Genome-fragment | NA    | 0 |
| S10_vs_28405  full         | 1039  | No | NA | 0  | 0  | Low-quality    | Genome-fragment | 2.53  | 0 |
| S10_vs_42217   H2gene      | 1039  | No | NA | 2  | 0  | Low-quality    | Genome-fragment | 2.24  | 0 |
| S17_vs_k141_163733  full   | 2210  | No | NA | 0  | 2  | Not-determined | Genome-fragment | NA    | 0 |
| S17_vs_k141_74975  full    | 2686  | No | NA | 0  | 0  | Not-determined | Genome-fragment | NA    | 0 |
| S12_vs_k141_37844  full    | 1039  | No | NA | 0  | 0  | Low-quality    | Genome-fragment | 2.99  | 0 |
| S12_vs_k141_62762  full    | 1039  | No | NA | 0  | 0  | Low-quality    | Genome-fragment | 2.15  | 0 |
| S17_vs_k141_159426  full   | 3378  | No | NA | 0  | 0  | Not-determined | Genome-fragment | NA    | 0 |
| S6_extracted_k141_9228     | 1039  | No | NA | 0  | 0  | Low-quality    | Genome-fragment | 0.47  | 0 |
| S17_vs_k141_163760  full   | 1833  | No | NA | 0  | 1  | Not-determined | Genome-fragment | NA    | 0 |
| S17_vs_k141_119449  full   | 1087  | No | NA | 0  | 0  | Not-determined | Genome-fragment | NA    | 0 |
| S8_extracted_k141_142743   | 1039  | No | NA | 0  | 0  | Low-quality    | Genome-fragment | 1.67  | 0 |
| S17_vs_k141_1160  full     | 1261  | No | NA | 0  | 0  | Not-determined | Genome-fragment | NA    | 0 |
| S8_extracted_k141_49113    | 1039  | No | NA | 0  | 1  | Low-quality    | Genome-fragment | 1.73  | 0 |
| S17_vs_k141_23145  full    | 1616  | No | NA | 0  | 0  | Not-determined | Genome-fragment | NA    | 0 |
| S8_vs_k141_87414  full     | 1039  | No | NA | 0  | 1  | Low-quality    | Genome-fragment | 3.32  | 0 |
| S8_vs_k141_141295   H2gene | 1039  | No | NA | 1  | 0  | Low-quality    | Genome-fragment | 3.34  | 0 |
| S17_vs_k141_45678  full    | 1410  | No | NA | 0  | 2  | Not-determined | Genome-fragment | NA    | 0 |
| S17_vs_k141_67686  full    | 1381  | No | NA | 0  | 0  | Not-determined | Genome-fragment | NA    | 0 |
| S17_vs_k141_141684  full   | 2505  | No | NA | 0  | 2  | Not-determined | Genome-fragment | NA    | 0 |
| S17_vs_k141_89829  full    | 1547  | No | NA | 0  | 0  | Not-determined | Genome-fragment | NA    | 0 |
| S17_vs_k141_141701  full   | 4755  | No | NA | 0  | 2  | Not-determined | Genome-fragment | NA    | 0 |
| S8_vs_k141_158478   H2gene | 1039  | No | NA | 1  | 0  | Low-quality    | Genome-fragment | 1.73  | 0 |
| S9_vs_k141_66290  full     | 1040  | No | NA | 0  | 0  | Low-quality    | Genome-fragment | 1.68  | 0 |
| S17_vs_k141_134110  full   | 4589  | No | NA | 0  | 3  | Not-determined | Genome-fragment | NA    | 0 |
| S17_vs_k141_171294  full   | 3024  | No | NA | 0  | 1  | Not-determined | Genome-fragment | NA    | 0 |
| S11_extracted_k141_37886   | 1040  | No | NA | 1  | 0  | Low-quality    | Genome-fragment | 0.74  | 0 |
| S11_vs_k141_57753   H2gene | 1040  | No | NA | 1  | 0  | Low-quality    | Genome-fragment | 2.75  | 0 |
| S17_vs_k141_111982  full   | 1465  | No | NA | 0  | 0  |                |                 |       |   |



|                           |       |    |    |   |    |                |                 |    |       |   |
|---------------------------|-------|----|----|---|----|----------------|-----------------|----|-------|---|
| S17_vx_k141_97431 full    | 3513  | No | NA | 0 | 2  | Not-determined | Genome-fragment | NA | 0.37  | 0 |
| S3_extracted_k141_60602   | 1041  | No | NA | 0 | 0  | Low-quality    | Genome-fragment | NA | 1.54  | 0 |
| S3_vx_k141_105337 full    | 1041  | No | NA | 0 | 1  | Low-quality    | Genome-fragment | NA | 2.53  | 0 |
| S5_vx_k141_102865 H2gene  | 1041  | No | NA | 1 | 0  | Low-quality    | Genome-fragment | NA | 1.54  | 0 |
| S17_vx_k141_171449 full   | 3180  | No | NA | 0 | 1  | Not-determined | Genome-fragment | NA | 1.27  | 0 |
| S16_vx_k101034 full       | 1041  | No | NA | 1 | 0  | Low-quality    | Genome-fragment | NA | 2.35  | 0 |
| S17_vx_k141_75187 full    | 1609  | No | NA | 0 | 2  | Not-determined | Genome-fragment | NA | 0.97  | 0 |
| S10_extracted_16727       | 1041  | No | NA | 0 | 0  | Low-quality    | Genome-fragment | NA | 1.85  | 0 |
| S17_vx_k141_126092 full   | 1863  | No | NA | 1 | 0  | Not-determined | Genome-fragment | NA | 2.35  | 0 |
| S12_vx_k141_146545 full   | 1041  | No | NA | 1 | 0  | Low-quality    | Genome-fragment | NA | 0.97  | 0 |
| S12_vx_k141_164809 full   | 1041  | No | NA | 0 | 0  | Low-quality    | Genome-fragment | NA | 10.19 | 0 |
| S17_vx_k141_38710 full    | 2166  | No | NA | 1 | 0  | Not-determined | Genome-fragment | NA | 2.42  | 0 |
| S17_vx_k141_75205 full    | 6192  | No | NA | 0 | 4  | Not-determined | Genome-fragment | NA | 1.85  | 0 |
| S17_vx_k141_23341 full    | 3963  | No | NA | 0 | 4  | Not-determined | Genome-fragment | NA | 3.14  | 0 |
| S15_vx_2427 H2gene        | 1041  | No | NA | 1 | 0  | Low-quality    | Genome-fragment | NA | 0.55  | 0 |
| S15_vx_46359 H2gene       | 1041  | No | NA | 1 | 0  | Low-quality    | Genome-fragment | NA | 0     | 0 |
| S6_vx_k141_38021 H2gene   | 1041  | No | NA | 1 | 0  | Low-quality    | Genome-fragment | NA | 0     | 0 |
| S8_extracted_k141_16237   | 1041  | No | NA | 0 | 0  | Low-quality    | Genome-fragment | NA | 0     | 0 |
| S17_vx_k141_28724 full    | 1589  | No | NA | 0 | 0  | Not-determined | Genome-fragment | NA | 0     | 0 |
| S11_vx_k141_69969 H2gene  | 1042  | No | NA | 1 | 0  | Low-quality    | Genome-fragment | NA | 0     | 0 |
| S14_extracted_k141_93236  | 1042  | No | NA | 1 | 0  | Low-quality    | Genome-fragment | NA | 0     | 0 |
| S17_vx_k141_53461 full    | 1071  | No | NA | 0 | 0  | Not-determined | Genome-fragment | NA | 0     | 0 |
| S17_vx_k141_75256 full    | 1617  | No | NA | 0 | 0  | Not-determined | Genome-fragment | NA | 0     | 0 |
| S17_vx_k141_141847 full   | 2225  | No | NA | 0 | 2  | Not-determined | Genome-fragment | NA | 0     | 0 |
| S14_vx_k141_13263 full    | 1042  | No | NA | 2 | 0  | Low-quality    | Genome-fragment | NA | 0     | 0 |
| S5_vx_k141_14818 H2gene   | 1042  | No | NA | 1 | 0  | Low-quality    | Genome-fragment | NA | 0     | 0 |
| S17_vx_k141_90361 full    | 1202  | No | NA | 0 | 1  | Not-determined | Genome-fragment | NA | 0     | 0 |
| S17_vx_k141_105280 full   | 4616  | No | NA | 0 | 2  | Not-determined | Genome-fragment | NA | 0     | 0 |
| S17_vx_k141_67887 full    | 2009  | No | NA | 0 | 2  | Not-determined | Genome-fragment | NA | 0     | 0 |
| S17_vx_k141_156808 full   | 18506 | No | NA | 0 | 10 | Not-determined | Genome-fragment | NA | 0     | 0 |
| S17_vx_k141_163977 full   | 2884  | No | NA | 0 | 1  | Not-determined | Genome-fragment | NA | 0     | 0 |
| S17_vx_k141_163987 full   | 2373  | No | NA | 0 | 1  | Not-determined | Genome-fragment | NA | 0     | 0 |
| S16_extracted_79229       | 1042  | No | NA | 0 | 2  | Low-quality    | Genome-fragment | NA | 1.87  | 0 |
| S16_extracted_129768      | 1042  | No | NA | 0 | 1  | Low-quality    | Genome-fragment | NA | 1     | 0 |
| S16_vx_24229 full         | 1042  | No | NA | 1 | 0  | Low-quality    | Genome-fragment | NA | 0.67  | 0 |
| S17_vx_k141_97596 full    | 2313  | No | NA | 1 | 0  | Not-determined | Genome-fragment | NA | 0     | 0 |
| S17_vx_k141_105343 full   | 1543  | No | NA | 0 | 1  | Not-determined | Genome-fragment | NA | 0     | 0 |
| S12_extracted_k141_131550 | 1042  | No | NA | 0 | 0  | Low-quality    | Genome-fragment | NA | 2.85  | 0 |
| S8_extracted_k141_54561   | 1042  | No | NA | 0 | 2  | Low-quality    | Genome-fragment | NA | 1.08  | 0 |
| S17_vx_k141_15928 full    | 2623  | No | NA | 0 | 2  | Not-determined | Genome-fragment | NA | 0     | 0 |
| S17_vx_k141_53561 full    | 1203  | No | NA | 0 | 1  | Not-determined | Genome-fragment | NA | 0     | 0 |
| S8_vx_k141_194644 full    | 1042  | No | NA | 0 | 0  | Low-quality    | Genome-fragment | NA | 2.48  | 0 |
| S17_vx_k141_37906 H2gene  | 1043  | No | NA | 2 | 0  | Low-quality    | Genome-fragment | NA | 2.18  | 0 |
| S13_vx_61342 full         | 1043  | No | NA | 0 | 0  | Low-quality    | Genome-fragment | NA | 2.28  | 0 |
| S13_vx_59618 full         | 1043  | No | NA | 0 | 0  | Low-quality    | Genome-fragment | NA | 0.63  | 0 |
| S17_vx_k141_82367 full    | 3224  | No | NA | 0 | 2  | Not-determined | Genome-fragment | NA | 0     | 0 |
| S17_vx_k141_90192 full    | 4884  | No | NA | 0 | 4  | Not-determined | Genome-fragment | NA | 0     | 0 |
| S17_vx_k141_68010 full    | 1396  | No | NA | 0 | 2  | Not-determined | Genome-fragment | NA | 0     | 0 |
| S17_vx_k141_142025 full   | 1908  | No | NA | 0 | 1  | Not-determined | Genome-fragment | NA | 0     | 0 |
| S17_vx_k141_105412 full   | 1441  | No | NA | 0 | 2  | Not-determined | Genome-fragment | NA | 0     | 0 |
| S17_vx_k141_82403 full    | 1940  | No | NA | 0 | 1  | Not-determined | Genome-fragment | NA | 0     | 0 |
| S14_vx_k141_74444 full    | 1042  | No | NA | 0 | 0  | Low-quality    | Genome-fragment | NA | 0.76  | 0 |
| S17_vx_k141_53601 full    | 3089  | No | NA | 0 | 1  | Not-determined | Genome-fragment | NA | 0     | 0 |
| S14_vx_k141_62284 H2gene  | 1043  | No | NA | 1 | 0  | Low-quality    | Genome-fragment | NA | 2.54  | 0 |
| S17_vx_k141_68037 full    | 3109  | No | NA | 0 | 2  | Not-determined | Genome-fragment | NA | 0.63  | 0 |
| S1_vx_k141_14502 full     | 1043  | No | NA | 0 | 0  | Low-quality    | Genome-fragment | NA | 0     | 0 |
| S17_vx_k141_53605 full    | 2061  | No | NA | 0 | 0  | Not-determined | Genome-fragment | NA | 0     | 0 |
| S17_vx_k141_53617 full    | 2393  | No | NA | 0 | 3  | Not-determined | Genome-fragment | NA | 0     | 0 |
| S17_vx_k141_82435 full    | 3118  | No | NA | 0 | 0  | Not-determined | Genome-fragment | NA | 0     | 0 |
| S17_vx_k141_156938 full   | 1098  | No | NA | 0 | 1  | Not-determined | Genome-fragment | NA | 0     | 0 |
| S3_extracted_k141_49070   | 1043  | No | NA | 0 | 0  | Low-quality    | Genome-fragment | NA | 1.83  | 0 |
| S3_extracted_k141_97202   | 1043  | No | NA | 0 | 2  | Low-quality    | Genome-fragment | NA | 1.59  | 0 |
| S17_vx_k141_105470 full   | 2182  | No | NA | 0 | 2  | Not-determined | Genome-fragment | NA | 0     | 0 |
| S17_vx_k141_23496 full    | 2285  | No | NA | 0 | 2  | Not-determined | Genome-fragment | NA | 0     | 0 |
| S17_vx_k141_38878 full    | 2096  | No | NA | 0 | 0  | Not-determined | Genome-fragment | NA | 0     | 0 |
| S5_vx_k141_121435 full    | 1043  | No | NA | 0 | 0  | Low-quality    | Genome-fragment | NA | 1.61  | 0 |
| S17_vx_k141_92101 full    | 2151  | No | NA | 0 | 1  | Not-determined | Genome-fragment | NA | 0     | 0 |
| S17_vx_k141_97755 full    | 2629  | No | NA | 0 | 1  | Not-determined | Genome-fragment | NA | 0     | 0 |
| S5_vx_k141_134661 full    | 1043  | No | NA | 0 | 0  | Low-quality    | Genome-fragment | NA | 3.03  | 0 |
| S7_extracted_86450        | 1043  | No | NA | 3 | 0  | Low-quality    | Genome-fragment | NA | 3.37  | 0 |
| S17_vx_k141_82499 full    | 5107  | No | NA | 0 | 2  | Not-determined | Genome-fragment | NA | 0     | 0 |
| S7_extracted_108755       | 1043  | No | NA | 0 | 0  | Low-quality    | Genome-fragment | NA | 1.73  | 0 |
| S17_vx_k141_60786 full    | 2383  | No | NA | 0 | 3  | Not-determined | Genome-fragment | NA | 0     | 0 |
| S17_vx_k141_134513 full   | 1727  | No | NA | 0 | 1  | Not-determined | Genome-fragment | NA | 0     | 0 |
| S17_vx_k141_46188 full    | 1203  | No | NA | 0 | 1  | Not-determined | Genome-fragment | NA | 0     | 0 |
| S7_vx_45525 full          | 1043  | No | NA | 1 | 0  | Low-quality    | Genome-fragment | NA | 2.73  | 0 |
| S17_vx_k141_126869 full   | 2904  | No | NA | 0 | 1  | Not-determined | Genome-fragment | NA | 0     | 0 |
| S17_vx_k141_1621 full     | 1167  | No | NA | 0 | 0  | Not-determined | Genome-fragment | NA | 0     | 0 |
| S10_extracted_106271      | 1043  | No | NA | 0 | 0  | Low-quality    | Genome-fragment | NA | 2.4   | 0 |
| S17_vx_k141_160541 full   | 1799  | No | NA | 0 | 0  | Not-determined | Genome-fragment | NA | 0     | 0 |
| S10_extracted_121228      | 1043  | No | NA | 2 | 0  | Low-quality    | Genome-fragment | NA | 3.44  | 0 |
| S17_vx_k141_75184 full    | 1620  | No | NA | 0 | 0  | Not-determined | Genome-fragment | NA | 0     | 0 |
| S12_extracted_k141_133254 | 1043  | No | NA | 0 | 0  | Low-quality    | Genome-fragment | NA | 1.66  | 0 |
| S15_vx_616 full           | 1043  | No | NA | 0 | 1  | Low-quality    | Genome-fragment | NA | 2.26  | 0 |
| S6_vx_k141_6492 full      | 1043  | No | NA | 0 | 0  | Low-quality    | Genome-fragment | NA | 1.96  | 0 |
| S17_vx_k141_21409 full    | 1746  | No | NA | 0 | 2  | Not-determined | Genome-fragment | NA | 0     | 0 |
| S8_vx_k141_147154 full    | 1043  | No | NA | 0 | 0  | Low-quality    | Genome-fragment | NA | 2.14  | 0 |
| S8_vx_k141_121783 H2gene  | 1043  | No | NA | 1 | 0  | Low-quality    | Genome-fragment | NA | 2.69  | 0 |
| S17_vx_k141_75406 full    | 2421  | No | NA | 0 | 2  | Not-determined | Genome-fragment | NA | 0     | 0 |
| S14_extracted_k141_89399  | 1044  | No | NA | 1 | 0  | Low-quality    | Genome-fragment | NA | 3.44  | 0 |
| S17_vx_k141_31426 full    | 2076  | No | NA | 0 | 1  | Not-determined | Genome-fragment | NA | 0     | 0 |
| S17_vx_k141_38955 full    | 2053  | No | NA | 0 | 0  | Not-determined | Genome-fragment | NA | 0     | 0 |
| S17_vx_k141_142202 full   | 1727  | No | NA | 0 | 0  | Not-determined | Genome-fragment | NA | 0     | 0 |
| S17_vx_k141_164175 full   | 9143  | No | NA | 0 | 2  | Not-determined | Genome-fragment | NA | 0     | 0 |
| S17_vx_k141_68201 full    | 1509  | No | NA | 0 | 0  | Not-determined | Genome-fragment | NA | 0     | 0 |
| S1_extracted_k141_27060   | 1044  | No | NA | 0 | 0  | Low-quality    | Genome-fragment | NA | 0.59  | 0 |
| S17_vx_k141_97887 full    | 1075  | No | NA | 0 | 1  | Not-determined | Genome-fragment | NA | 0     | 0 |
| S17_vx_k141_82601 full    | 10815 | No | NA | 0 | 3  | Not-determined | Genome-fragment | NA | 0     | 0 |
| S17_vx_k141_126974 full   | 1613  | No | NA | 0 | 0  | Not-determined | Genome-fragment | NA | 0     | 0 |
| S17_vx_k141_75441 full    | 1211  | No | NA | 0 | 0  | Not-determined | Genome-fragment | NA | 0     | 0 |
| S1_extracted_k141_2421    | 1044  | No | NA | 0 | 0  | Low-quality    | Genome-fragment | NA | 1.06  | 0 |
| S1_vx_k141_132022 full    | 1044  | No | NA | 0 | 0  | Low-quality    | Genome-fragment | NA | 1.3   | 0 |
| S1_vx_k141_63395 H2gene   | 1044  | No | NA | 1 | 0  | Low-quality    | Genome-fragment | NA | 2.77  | 0 |
| S5_vx_k141_5563 full      | 1044  | No | NA | 0 | 1  | Low-quality    | Genome-fragment | NA | 0.89  | 0 |
| S17_vx_k141_120441 full   | 2412  | No | NA | 0 | 0  | Not-determined | Genome-fragment | NA | 0     | 0 |
| S7_vx_25695 full          | 1044  | No | NA | 0 | 0  | Low-quality    | Genome-fragment | NA | 2.18  | 0 |
| S16_extracted_95025       | 1044  | No | NA | 0 | 0  | Low-quality    | Genome-fragment | NA | 1.78  | 0 |
| S10_extracted_114375      | 1044  | No | NA | 1 | 0  | Low-quality    | Genome-fragment | NA | 0.45  | 0 |
| S17_vx_k141_08805 full    | 3558  | No | NA | 1 | 0  | Not-determined | Genome-fragment | NA | 0     | 0 |
| S10_vx_54546 full         | 1044  | No | NA | 1 | 0  | Low-quality    | Genome-fragment | NA | 1.78  | 0 |
| S12_extracted_k141_84821  | 1044  | No | NA | 0 | 1  | Low-quality    | Genome-fragment | NA | 2.97  | 0 |
| S17_vx_k141_82654 full    | 1509  | No | NA | 0 | 0  | Not-determined | Genome-fragment | NA | 0     | 0 |
| S15_vx_26781 full         | 1044  | No | NA | 0 | 0  | Low-quality    | Genome-fragment | NA | 2.17  | 0 |
| S17_vx_k141_164233 full   | 2012  | No | NA | 0 | 0  | Not-determined | Genome-fragment | NA | 0     | 0 |
| S6_vx_k141_164401 full    | 1044  | No | NA | 0 | 0  | Low-quality    | Genome-fragment | NA | 2.28  | 0 |
| S17_vx_k141_82692 full    | 2752  | No | NA | 0 | 2  | Not-determined | Genome-fragment | NA | 0     | 0 |
| S17_vx_k141_16228 full    | 1589  | No | NA | 0 | 0  | Not-determined | Genome-fragment | NA | 0     | 0 |
| S17_vx_k141_164253 full   | 1661  | No | NA | 0 | 2  | Not-determined | Genome-fragment | NA | 0     | 0 |
| S8_extracted_k141_15708   | 1044  | No | NA | 0 | 1  | Low-quality    | Genome-fragment | NA | 3.33  | 0 |
| S17_vx_k141_82714 full    | 1389  | No | NA | 0 | 1  | Not-determined | Genome-fragment | NA | 0     | 0 |
| S17_extracted_k141_90452  | 1045  | No | NA | 1 | 0  | Low-quality    | Genome-fragment | NA | 1.35  | 0 |
| S17_vx_k141_23831 full    | 1457  | No | NA | 0 | 0  | Not-determined | Genome-fragment | NA | 0     | 0 |
| S17_vx_k141_60847 full    | 9520  | No | NA | 0 | 5  | Not-determined | Genome-fragment | NA | 0     | 0 |
| S17_vx_k141_164262 full   | 2816  | No | NA | 0 | 0  | Not-determined | Genome-fragment | NA | 0     | 0 |
| S17_vx_k141_60861 full    | 2415  | No | NA | 0 | 0  | Not-determined | Genome-fragment | NA | 0     | 0 |
| S9_extracted_k141_24091   | 1045  | No | NA | 0 | 1  | Low-quality    | Genome-fragment | NA | 0.07  | 0 |
| S17_vx_k141_23842 full    | 5450  | No | NA | 0 | 2  | Not-determined | Genome-fragment | NA | 0     | 0 |
| S9_vx_k141_76100 H2gene   | 1045  | No | NA | 0 | 0  | Low-quality    | Genome-fragment | NA | 2.39  | 0 |
| S17_vx_k141_23845 full    | 2983  | No | NA | 0 | 0  | Not-determined | Genome-fragment | NA | 0     | 0 |
| S17_vx_k141_75506 full    | 2179  | No | NA | 0 | 1  | Not-determined | Genome-fragment | NA | 0     | 0 |
| S14_vx_k141_130641 full   | 1045  | No | NA | 3 | 0  | Low-quality    | Genome-fragment | NA | 2.14  | 0 |
| S3_extracted_k141_51225   | 1045  | No | NA | 0 | 0  | Low-quality    | Genome-fragment | NA | 3.35  | 0 |
| S17_vx_k141_120199 full   | 1512  | No | NA | 0 | 0  | Not-determined |                 |    |       |   |



|                           |       |    |    |   |   |                |                 |       |   |
|---------------------------|-------|----|----|---|---|----------------|-----------------|-------|---|
| S17_extracted_k141_124887 | 1046  | No | NA | 0 | 1 | Low-quality    | Genome-fragment | 0.51  | 0 |
| S9_vs_k141_77811[full]    | 1046  | No | NA | 0 | 0 | Low-quality    | Genome-fragment | 2.41  | 0 |
| S14_extracted_k141_105691 | 1046  | No | NA | 0 | 0 | Low-quality    | Genome-fragment | 1.77  | 0 |
| S17_vs_k141_150216[full]  | 2771  | No | NA | 0 | 1 | Not-determined | Genome-fragment | NA    | 0 |
| S14_vs_k141_125181[full]  | 1046  | No | NA | 0 | 1 | Low-quality    | Genome-fragment | 0.94  | 0 |
| S1_extracted_k141_156687  | 1046  | No | NA | 0 | 1 | Low-quality    | Genome-fragment | 2.46  | 0 |
| S17_vs_k141_75711[full]   | 7915  | No | NA | 0 | 1 | Not-determined | Genome-fragment | NA    | 0 |
| S3_extracted_k141_10146   | 1046  | No | NA | 0 | 0 | Low-quality    | Genome-fragment | 2.27  | 0 |
| S5_vs_k141_121607[full]   | 1046  | No | NA | 0 | 0 | Low-quality    | Genome-fragment | 2.61  | 0 |
| S7_vs_13668[full]         | 1046  | No | NA | 1 | 0 | Low-quality    | Genome-fragment | 2.59  | 0 |
| S17_vs_k141_134992[full]  | 6478  | No | NA | 0 | 4 | Not-determined | Genome-fragment | NA    | 0 |
| S16_vs_15640[full]        | 1046  | No | NA | 0 | 0 | Low-quality    | Genome-fragment | 2.67  | 0 |
| S12_extracted_k141_96362  | 1046  | No | NA | 0 | 0 | Low-quality    | Genome-fragment | 2.25  | 0 |
| S12_extracted_k141_13937  | 1046  | No | NA | 0 | 0 | Low-quality    | Genome-fragment | 2.29  | 0 |
| S17_vs_k141_150251[full]  | 5468  | No | NA | 0 | 0 | Not-determined | Genome-fragment | NA    | 0 |
| S15_extracted_22433       | 1046  | No | NA | 0 | 0 | Low-quality    | Genome-fragment | 2.32  | 0 |
| S17_vs_k141_39421[full]   | 2606  | No | NA | 0 | 0 | Not-determined | Genome-fragment | NA    | 0 |
| S17_vs_k141_68589[full]   | 6813  | No | NA | 0 | 4 | Not-determined | Genome-fragment | NA    | 0 |
| S17_vs_k141_2044[full]    | 1051  | No | NA | 0 | 0 | Not-determined | Genome-fragment | NA    | 0 |
| S15_vs_11101[full]        | 1046  | No | NA | 2 | 0 | Low-quality    | Genome-fragment | 2.46  | 0 |
| S17_vs_k141_127333[full]  | 3969  | No | NA | 0 | 2 | Not-determined | Genome-fragment | NA    | 0 |
| S17_vs_k141_75757[full]   | 2423  | No | NA | 0 | 2 | Not-determined | Genome-fragment | NA    | 0 |
| S6_vs_k141_14134[full]    | 1046  | No | NA | 0 | 0 | Low-quality    | Genome-fragment | 1.71  | 0 |
| S17_vs_k141_90499[full]   | 2176  | No | NA | 0 | 0 | Not-determined | Genome-fragment | NA    | 0 |
| S6_vs_k141_49090[full]    | 1046  | No | NA | 0 | 0 | Low-quality    | Genome-fragment | 1.47  | 0 |
| S17_vs_k141_9602[full]    | 1252  | No | NA | 0 | 1 | Not-determined | Genome-fragment | NA    | 0 |
| S17_vs_k141_39473[full]   | 1412  | No | NA | 0 | 1 | Not-determined | Genome-fragment | NA    | 0 |
| S17_vs_k141_68628[full]   | 1904  | No | NA | 0 | 1 | Not-determined | Genome-fragment | NA    | 0 |
| S17_vs_k141_164589[full]  | 3344  | No | NA | 0 | 1 | Not-determined | Genome-fragment | NA    | 0 |
| S8_vs_k141_18937[full]    | 1046  | No | NA | 1 | 0 | Low-quality    | Genome-fragment | 1.8   | 0 |
| S17_vs_k141_24083[full]   | 1032  | No | NA | 0 | 0 | Not-determined | Genome-fragment | NA    | 0 |
| S17_vs_k141_54212[full]   | 2860  | No | NA | 0 | 2 | Not-determined | Genome-fragment | NA    | 0 |
| S17_vs_k141_68641[full]   | 2059  | No | NA | 0 | 1 | Not-determined | Genome-fragment | NA    | 0 |
| S17_vs_k141_2079[full]    | 25077 | No | NA | 2 | 2 | Medium-quality | Genome-fragment | 58.55 | 0 |
| S17_vs_k141_135064[full]  | 1484  | No | NA | 0 | 2 | Not-determined | Genome-fragment | NA    | 0 |
| S8_vs_k141_14921[full]    | 1046  | No | NA | 0 | 0 | Low-quality    | Genome-fragment | 1.97  | 0 |
| S17_vs_k141_150372[full]  | 1126  | No | NA | 0 | 0 | Not-determined | Genome-fragment | NA    | 0 |
| S17_vs_k141_164625[full]  | 4122  | No | NA | 0 | 0 | Not-determined | Genome-fragment | NA    | 0 |
| S17_vs_k141_16552[full]   | 2146  | No | NA | 0 | 0 | Not-determined | Genome-fragment | NA    | 0 |
| S17_vs_k141_39496[full]   | 12869 | No | NA | 1 | 2 | Not-determined | Genome-fragment | NA    | 0 |
| S17_extracted_k141_9003   | 1047  | No | NA | 1 | 0 | Low-quality    | Genome-fragment | 1.65  | 0 |
| S17_extracted_k141_1474   | 1047  | No | NA | 0 | 0 | Low-quality    | Genome-fragment | 2.48  | 0 |
| S9_extracted_k141_36682   | 1047  | No | NA | 0 | 0 | Low-quality    | Genome-fragment | 0.6   | 0 |
| S17_vs_k141_68706[full]   | 1097  | No | NA | 0 | 1 | Not-determined | Genome-fragment | NA    | 0 |
| S17_vs_k141_157510[full]  | 1668  | No | NA | 0 | 1 | Not-determined | Genome-fragment | NA    | 0 |
| S9_vs_k141_87841[full]    | 1047  | No | NA | 0 | 1 | Low-quality    | Genome-fragment | 49.34 | 0 |
| S17_vs_k141_150412[full]  | 1903  | No | NA | 0 | 2 | Not-determined | Genome-fragment | NA    | 0 |
| S11_extracted_k141_25118  | 1047  | No | NA | 0 | 0 | Low-quality    | Genome-fragment | 2.48  | 0 |
| S17_vs_k141_157531[full]  | 4313  | No | NA | 0 | 0 | Not-determined | Genome-fragment | NA    | 0 |
| S17_vs_k141_171894[full]  | 2904  | No | NA | 0 | 1 | Not-determined | Genome-fragment | NA    | 0 |
| S17_vs_k141_39515[full]   | 36323 | No | NA | 4 | 1 | Medium-quality | Genome-fragment | 58.53 | 0 |
| S17_vs_k141_171906[full]  | 5839  | No | NA | 0 | 1 | Not-determined | Genome-fragment | NA    | 0 |
| S17_vs_k141_150440[full]  | 1873  | No | NA | 0 | 0 | Not-determined | Genome-fragment | NA    | 0 |
| S17_vs_k141_171912[full]  | 1604  | No | NA | 0 | 1 | Not-determined | Genome-fragment | NA    | 0 |
| S17_vs_k141_68775[full]   | 2942  | No | NA | 0 | 2 | Not-determined | Genome-fragment | NA    | 0 |
| S13_extracted_48175       | 1047  | No | NA | 0 | 0 | Low-quality    | Genome-fragment | 0.48  | 0 |
| S14_vs_k141_2639[full]    | 1047  | No | NA | 0 | 0 | Low-quality    | Genome-fragment | 2.63  | 0 |
| S17_vs_k141_24165[full]   | 1715  | No | NA | 0 | 1 | Not-determined | Genome-fragment | NA    | 0 |
| S17_vs_k141_112863[full]  | 1042  | No | NA | 0 | 1 | Not-determined | Genome-fragment | NA    | 0 |
| S3_extracted_k141_19230   | 1047  | No | NA | 0 | 0 | Low-quality    | Genome-fragment | 2.22  | 0 |
| S17_vs_k141_61049[full]   | 2524  | No | NA | 0 | 2 | Not-determined | Genome-fragment | NA    | 0 |
| S17_vs_k141_171944[full]  | 2454  | No | NA | 0 | 1 | Not-determined | Genome-fragment | NA    | 0 |
| S17_vs_k141_90642[full]   | 2686  | No | NA | 0 | 0 | Not-determined | Genome-fragment | NA    | 0 |
| S3_vs_k141_40918[full]    | 1047  | No | NA | 2 | 0 | Low-quality    | Genome-fragment | 1.71  | 0 |
| S17_vs_k141_61079[full]   | 1048  | No | NA | 0 | 1 | Not-determined | Genome-fragment | NA    | 0 |
| S7_vs_37199[full]         | 1047  | No | NA | 0 | 0 | Low-quality    | Genome-fragment | 2.32  | 0 |
| S17_vs_k141_24204[full]   | 3060  | No | NA | 0 | 1 | Not-determined | Genome-fragment | NA    | 0 |
| S17_vs_k141_82943[full]   | 3063  | No | NA | 0 | 3 | Not-determined | Genome-fragment | NA    | 0 |
| S16_extracted_14369       | 1047  | No | NA | 0 | 1 | Low-quality    | Genome-fragment | 1.87  | 0 |
| S17_vs_k141_120527[full]  | 1479  | No | NA | 0 | 1 | Not-determined | Genome-fragment | NA    | 0 |
| S17_vs_k141_61104[full]   | 1741  | No | NA | 0 | 0 | Not-determined | Genome-fragment | NA    | 0 |
| S10_vs_38074[full]        | 1047  | No | NA | 0 | 0 | Low-quality    | Genome-fragment | 2.02  | 0 |
| S12_extracted_k141_98567  | 1047  | No | NA | 1 | 0 | Low-quality    | Genome-fragment | 3.08  | 0 |
| S17_vs_k141_39651[full]   | 1222  | No | NA | 0 | 1 | Not-determined | Genome-fragment | NA    | 0 |
| S17_vs_k141_68824[full]   | 4822  | No | NA | 0 | 1 | Not-determined | Genome-fragment | NA    | 0 |
| S12_vs_k141_165443[full]  | 1047  | No | NA | 0 | 1 | Low-quality    | Genome-fragment | 0.5   | 0 |
| S17_vs_k141_142838[full]  | 2281  | No | NA | 0 | 3 | Not-determined | Genome-fragment | NA    | 0 |
| S4_extracted_25211        | 1047  | No | NA | 0 | 1 | Low-quality    | Genome-fragment | 3.43  | 0 |
| S17_vs_k141_307141[full]  | 4701  | No | NA | 0 | 2 | Not-determined | Genome-fragment | NA    | 0 |
| S6_vs_k141_43922[full]    | 1047  | No | NA | 0 | 0 | Low-quality    | Genome-fragment | 1.74  | 0 |
| S17_vs_k141_32000[full]   | 1399  | No | NA | 0 | 0 | Not-determined | Genome-fragment | NA    | 0 |
| S8_extracted_k141_20135   | 1047  | No | NA | 0 | 0 | Low-quality    | Genome-fragment | 1.6   | 0 |
| S8_extracted_k141_49668   | 1047  | No | NA | 0 | 1 | Low-quality    | Genome-fragment | 0.59  | 0 |
| S17_vs_k141_54340[full]   | 1404  | No | NA | 0 | 0 | Not-determined | Genome-fragment | NA    | 0 |
| S8_vs_k141_105928[full]   | 1047  | No | NA | 0 | 0 | Low-quality    | Genome-fragment | 1.05  | 0 |
| S8_vs_k141_147124[full]   | 1047  | No | NA | 2 | 0 | Low-quality    | Genome-fragment | 2.72  | 0 |
| S17_vs_k141_76048[full]   | 13221 | No | NA | 0 | 4 | Not-determined | Genome-fragment | NA    | 0 |
| S17_vs_k141_127519[full]  | 31736 | No | NA | 7 | 0 | Medium-quality | Genome-fragment | 72.13 | 0 |
| S8_vs_k141_178161[full]   | 1047  | No | NA | 0 | 0 | Low-quality    | Genome-fragment | 0.6   | 0 |
| S17_vs_k141_127533[full]  | 1164  | No | NA | 0 | 1 | Not-determined | Genome-fragment | NA    | 0 |
| S17_vs_k141_24273[full]   | 1048  | No | NA | 0 | 1 | Low-quality    | Genome-fragment | 1.11  | 0 |
| S11_extracted_k141_65743  | 1048  | No | NA | 0 | 0 | Low-quality    | Genome-fragment | 1.33  | 0 |
| S17_vs_k141_157729[full]  | 3582  | No | NA | 0 | 1 | Not-determined | Genome-fragment | NA    | 0 |
| S11_vs_k141_98032[full]   | 1048  | No | NA | 0 | 1 | Low-quality    | Genome-fragment | 0.47  | 0 |
| S11_vs_k141_81411[full]   | 1048  | No | NA | 0 | 0 | Low-quality    | Genome-fragment | 1.52  | 0 |
| S17_vs_k141_157755[full]  | 1895  | No | NA | 0 | 2 | Not-determined | Genome-fragment | NA    | 0 |
| S17_vs_k141_24311[full]   | 2588  | No | NA | 0 | 0 | Not-determined | Genome-fragment | NA    | 0 |
| S13_extracted_45611       | 1048  | No | NA | 1 | 0 | Low-quality    | Genome-fragment | 2.17  | 0 |
| S14_extracted_k141_105021 | 1048  | No | NA | 0 | 0 | Low-quality    | Genome-fragment | 3.81  | 0 |
| S3_extracted_k141_19782   | 1048  | No | NA | 1 | 0 | Low-quality    | Genome-fragment | 2.84  | 0 |
| S17_vs_k141_123118[full]  | 1048  | No | NA | 1 | 0 | Low-quality    | Genome-fragment | 1.92  | 0 |
| S3_vs_k141_69775[full]    | 1048  | No | NA | 0 | 0 | Low-quality    | Genome-fragment | 0.72  | 0 |
| S5_extracted_k141_134057  | 1048  | No | NA | 2 | 0 | Low-quality    | Genome-fragment | 1.41  | 0 |
| S5_vs_k141_27260[full]    | 1048  | No | NA | 1 | 0 | Low-quality    | Genome-fragment | 1.5   | 0 |
| S7_vs_38072[full]         | 1048  | No | NA | 0 | 0 | Low-quality    | Genome-fragment | 1.98  | 0 |
| S16_extracted_83952       | 1048  | No | NA | 0 | 0 | Low-quality    | Genome-fragment | 1.97  | 0 |
| S17_vs_k141_16767[full]   | 2779  | No | NA | 0 | 0 | Not-determined | Genome-fragment | NA    | 0 |
| S17_vs_k141_46857[full]   | 2195  | No | NA | 0 | 1 | Not-determined | Genome-fragment | NA    | 0 |
| S16_vs_173159[full]       | 1048  | No | NA | 0 | 0 | Low-quality    | Genome-fragment | 0.93  | 0 |
| S16_vs_65962[full]        | 1048  | No | NA | 0 | 1 | Low-quality    | Genome-fragment | 1.83  | 0 |
| S16_vs_141177[full]       | 1048  | No | NA | 0 | 1 | Low-quality    | Genome-fragment | 2.06  | 0 |
| S10_vs_34607[full]        | 1048  | No | NA | 0 | 1 | Low-quality    | Genome-fragment | 2.26  | 0 |
| S17_vs_k141_113061[full]  | 3152  | No | NA | 0 | 3 | Not-determined | Genome-fragment | NA    | 0 |
| S10_vs_115859[full]       | 1048  | No | NA | 0 | 1 | Low-quality    | Genome-fragment | 3.98  | 0 |
| S10_vs_40352[full]        | 1048  | No | NA | 0 | 0 | Low-quality    | Genome-fragment | 1.74  | 0 |
| S17_vs_k141_46917[full]   | 1773  | No | NA | 0 | 1 | Not-determined | Genome-fragment | NA    | 0 |
| S17_vs_k141_2270[full]    | 1181  | No | NA | 0 | 0 | Not-determined | Genome-fragment | NA    | 0 |
| S15_vs_12177[full]        | 1048  | No | NA | 0 | 0 | Low-quality    | Genome-fragment | 19.33 | 0 |
| S17_vs_k141_127683[full]  | 1358  | No | NA | 0 | 1 | Not-determined | Genome-fragment | NA    | 0 |
| S17_vs_k141_135251[full]  | 1088  | No | NA | 0 | 2 | Not-determined | Genome-fragment | NA    | 0 |
| S8_vs_k141_46095[full]    | 1048  | No | NA | 0 | 0 | Low-quality    | Genome-fragment | 2.48  | 0 |
| S9_extracted_k141_78404   | 1049  | No | NA | 0 | 0 | Low-quality    | Genome-fragment | 2.24  | 0 |
| S17_vs_k141_54483[full]   | 1063  | No | NA | 0 | 1 | Not-determined | Genome-fragment | NA    | 0 |
| S17_vs_k141_58661[full]   | 3663  | No | NA | 0 | 3 | Not-determined | Genome-fragment | NA    | 0 |
| S9_vs_k141_88850[full]    | 1049  | No | NA | 0 | 0 | Low-quality    | Genome-fragment | 2.36  | 0 |
| S17_vs_k141_76223[full]   | 2293  | No | NA | 0 | 2 | Not-determined | Genome-fragment | NA    | 0 |
| S17_vs_k141_90885[full]   | 16374 | No | NA | 0 | 7 | Not-determined | Genome-fragment | NA    | 0 |
| S1_extracted_k141_7128    | 1049  | No | NA | 0 | 1 | Low-quality    | Genome-fragment | 2.05  | 0 |
| S3_vs_k141_120317[full]   | 1049  | No | NA | 0 | 0 | Low-quality    | Genome-fragment | 0.6   | 0 |
| S3_vs_k141_123189[full]   | 1049  | No | NA | 1 | 0 | Low-quality    | Genome-fragment | 1.67  | 0 |
| S5_vs_k141_128802[full]   | 1049  | No | NA | 1 | 0 | Low-quality    | Genome-fragment | 2.55  | 0 |
| S7_extracted_72180        | 1049  | No | NA | 0 | 0 | Low-quality    | Genome-fragment | 1.94  | 0 |
| S7_extracted_98467        | 1049  | No | NA | 1 | 0 | Low-quality    | Genome-fragment | 16.58 | 0 |
| S17_vs_k141_90924[full]   | 3914  | No | NA | 0 | 3 | Not-determined | Genome-fragment | NA    | 0 |
| S17_vs_k141_100671[full]  | 1313  | No | NA | 0 | 2 | Not-determined | Genome-fragment | NA    | 0 |
| S16_vs_152872[full]       | 1049  | No | NA | 0 | 1 | Low-quality    | Genome-fragment | 1.41  | 0 |
| S17_vs_k141_24394[full]   | 1376  | No | NA | 0 | 1 | Not-determined | Genome-fragment | NA    | 0 |
| S12_vs_k141_178976[full]  | 1049  | No | NA | 0 | 0 | Low-quality    | Genome-fragment | 2.11  | 0 |
| S15_extracted_67508       | 1049  | No | NA | 0 | 1 | Low-quality    | Genome-fragment | 0.99  | 0 |
| S17_vs_k141_54578[full]   | 1640  | No | NA | 0 | 0 | Not-determined | Genome-fragment | NA    | 0 |
| S17_vs_k141_157905[full]  | 1856  | No | NA | 0 | 0 | Not-determined | Genome-fragment | NA    | 0 |
| S17_vs_k141_90970[full]   | 1703  | No | NA | 0 | 1 | Not-determined | Genome-fragment | NA    | 0 |
| S17_vs_k141_47043[full]   | 2708  | No | NA | 0 | 0 | Not-determined | Genome-fragment | NA    | 0 |
| S17_extracted_k141_70719  |       |    |    |   |   |                |                 |       |   |



|                           |           |       |    |    |    |   |                |                 |       |   |
|---------------------------|-----------|-------|----|----|----|---|----------------|-----------------|-------|---|
| S17_vs_k141_98933         | [full]    | 6340  | No | NA | 0  | 3 | Not-determined | Genome-fragment | NA    | 0 |
| S17_vs_k141_143306        | [full]    | 1648  | No | NA | 0  | 0 | Not-determined | Genome-fragment | NA    | 0 |
| S17_vs_k141_24563         | [full]    | 2125  | No | NA | 0  | 0 | Not-determined | Genome-fragment | NA    | 0 |
| S17_vs_k141_40130         | [full]    | 2891  | No | NA | 0  | 1 | Not-determined | Genome-fragment | NA    | 0 |
| S13_extracted_k141_137445 |           | 1051  | No | NA | 0  | 1 | Low-quality    | Genome-fragment | NA    | 0 |
| S13_extracted_k141_98973  |           | 1051  | No | NA | 0  | 1 | Low-quality    | Genome-fragment | 0.11  | 0 |
| S1_vs_k141_91764          | [full]    | 1051  | No | NA | 0  | 0 | Low-quality    | Genome-fragment | 0.34  | 0 |
| S17_vs_k141_69269         | [full]    | 1848  | No | NA | 0  | 1 | Not-determined | Genome-fragment | NA    | 0 |
| S17_vs_k141_83373         | [full]    | 4616  | No | NA | 0  | 2 | Not-determined | Genome-fragment | NA    | 0 |
| S3_vs_k141_14890          | [full]    | 1051  | No | NA | 0  | 1 | Low-quality    | Genome-fragment | 1.3   | 0 |
| S16_vs_13388              | [full]    | 1051  | No | NA | 0  | 0 | Low-quality    | Genome-fragment | 2.94  | 0 |
| S10_extracted_104661      |           | 1051  | No | NA | 0  | 0 | Low-quality    | Genome-fragment | 2.36  | 0 |
| S17_vs_k141_61543         | [full]    | 1451  | No | NA | 0  | 0 | Not-determined | Genome-fragment | NA    | 0 |
| S17_vs_k141_32568         | [full]    | 1025  | No | NA | 0  | 0 | Not-determined | Genome-fragment | NA    | 0 |
| S17_vs_k141_17137         | [full]    | 2634  | No | NA | 0  | 1 | Not-determined | Genome-fragment | NA    | 0 |
| S17_vs_k141_47136         | [full]    | 2542  | No | NA | 0  | 2 | Not-determined | Genome-fragment | NA    | 0 |
| S10_vs_84954              | [in2gene] | 1051  | No | NA | 1  | 0 | Low-quality    | Genome-fragment | 2.31  | 0 |
| S17_vs_k141_32599         | [full]    | 1896  | No | NA | 0  | 1 | Not-determined | Genome-fragment | NA    | 0 |
| S8_extracted_k141_64148   |           | 1051  | No | NA | 0  | 2 | Low-quality    | Genome-fragment | NA    | 0 |
| S17_vs_k141_2625          | [full]    | 2967  | No | NA | 0  | 1 | Not-determined | Genome-fragment | NA    | 0 |
| S8_vs_k141_78705          | [full]    | 1051  | No | NA | 0  | 0 | Low-quality    | Genome-fragment | 0.91  | 0 |
| S8_vs_k141_98624          | [in2gene] | 1051  | No | NA | 1  | 0 | Low-quality    | Genome-fragment | 2.31  | 0 |
| S17_vs_k141_83471         | [full]    | 1144  | No | NA | 0  | 0 | Not-determined | Genome-fragment | NA    | 0 |
| S17_vs_k141_32647         | [full]    | 1601  | No | NA | 0  | 0 | Not-determined | Genome-fragment | NA    | 0 |
| S17_vs_k141_99040         | [full]    | 2676  | No | NA | 0  | 3 | Not-determined | Genome-fragment | NA    | 0 |
| S17_vs_k141_100787        | [full]    | 1544  | No | NA | 0  | 0 | Not-determined | Genome-fragment | NA    | 0 |
| S9_extracted_k141_53740   |           | 1052  | No | NA | 0  | 1 | Low-quality    | Genome-fragment | 0.29  | 0 |
| S17_vs_k141_76609         | [full]    | 1941  | No | NA | 0  | 2 | Not-determined | Genome-fragment | NA    | 0 |
| S17_vs_k141_113337        | [full]    | 1090  | No | NA | 0  | 0 | Not-determined | Genome-fragment | NA    | 0 |
| S13_vs_33660              | [in2gene] | 1052  | No | NA | 1  | 0 | Low-quality    | Genome-fragment | 2.21  | 0 |
| S17_vs_k141_61609         | [full]    | 3164  | No | NA | 0  | 0 | Not-determined | Genome-fragment | NA    | 0 |
| S17_vs_k141_40248         | [full]    | 4471  | No | NA | 0  | 0 | Not-determined | Genome-fragment | NA    | 0 |
| S5_vs_k141_119230         | [full]    | 1052  | No | NA | 0  | 0 | Low-quality    | Genome-fragment | 3.01  | 0 |
| S17_vs_k141_69420         | [full]    | 3055  | No | NA | 0  | 3 | Not-determined | Genome-fragment | NA    | 0 |
| S17_vs_k141_106822        | [full]    | 1316  | No | NA | 0  | 1 | Not-determined | Genome-fragment | NA    | 0 |
| S17_vs_k141_113378        | [full]    | 3319  | No | NA | 0  | 0 | Not-determined | Genome-fragment | NA    | 0 |
| S7_extracted_21812        |           | 1052  | No | NA | 0  | 0 | Low-quality    | Genome-fragment | 2.21  | 0 |
| S7_vs_66485               | [full]    | 1052  | No | NA | 0  | 1 | Low-quality    | Genome-fragment | 0.98  | 0 |
| S7_vs_110592              | [full]    | 1052  | No | NA | 0  | 0 | Low-quality    | Genome-fragment | 2.41  | 0 |
| S17_vs_k141_54682         | [full]    | 4092  | No | NA | 0  | 5 | Not-determined | Genome-fragment | NA    | 0 |
| S17_vs_k141_113389        | [full]    | 12155 | No | NA | 0  | 3 | Not-determined | Genome-fragment | NA    | 0 |
| S17_vs_k141_128103        | [full]    | 2626  | No | NA | 0  | 1 | Not-determined | Genome-fragment | NA    | 0 |
| S17_vs_k141_10304         | [full]    | 2538  | No | NA | 0  | 1 | Not-determined | Genome-fragment | NA    | 0 |
| S17_vs_k141_121041        | [full]    | 34319 | No | NA | 19 | 0 | Medium-quality | Genome-fragment | 72.74 | 0 |
| S16_extracted_41482       |           | 1052  | No | NA | 1  | 0 | Low-quality    | Genome-fragment | 0.36  | 0 |
| S12_extracted_k141_16034  |           | 1052  | No | NA | 0  | 1 | Low-quality    | Genome-fragment | 0.47  | 0 |
| S17_vs_k141_135708        | [full]    | 3275  | No | NA | 0  | 2 | Not-determined | Genome-fragment | NA    | 0 |
| S17_vs_k141_10324         | [full]    | 2223  | No | NA | 0  | 2 | Not-determined | Genome-fragment | NA    | 0 |
| S12_extracted_k141_137914 |           | 1052  | No | NA | 0  | 0 | Low-quality    | Genome-fragment | 1.06  | 0 |
| S15_extracted_12472       |           | 1052  | No | NA | 0  | 0 | Low-quality    | Genome-fragment | 0.61  | 0 |
| S17_vs_k141_97347         | [full]    | 1053  | No | NA | 0  | 2 | Low-quality    | Genome-fragment | 1.77  | 0 |
| S17_vs_k141_83550         | [full]    | 1152  | No | NA | 0  | 1 | Not-determined | Genome-fragment | NA    | 0 |
| S17_vs_k141_61720         | [full]    | 2718  | No | NA | 0  | 0 | Not-determined | Genome-fragment | NA    | 0 |
| S17_vs_k141_17307         | [full]    | 1374  | No | NA | 0  | 2 | Not-determined | Genome-fragment | NA    | 0 |
| S11_vs_k141_24808         | [full]    | 1053  | No | NA | 0  | 0 | Low-quality    | Genome-fragment | 1.93  | 0 |
| S17_vs_k141_63726         | [full]    | 2777  | No | NA | 0  | 2 | Not-determined | Genome-fragment | NA    | 0 |
| S11_vs_k141_12685         | [full]    | 1053  | No | NA | 0  | 0 | Low-quality    | Genome-fragment | 2.92  | 0 |
| S17_vs_k141_113436        | [full]    | 1861  | No | NA | 0  | 1 | Not-determined | Genome-fragment | NA    | 0 |
| S14_extracted_k141_25162  |           | 1053  | No | NA | 0  | 0 | Low-quality    | Genome-fragment | 2.37  | 0 |
| S17_vs_k141_61752         | [full]    | 3289  | No | NA | 0  | 1 | Not-determined | Genome-fragment | NA    | 0 |
| S17_vs_k141_113436        | [full]    | 3266  | No | NA | 0  | 3 | Not-determined | Genome-fragment | NA    | 0 |
| S17_vs_k141_61765         | [full]    | 1157  | No | NA | 0  | 1 | Not-determined | Genome-fragment | NA    | 0 |
| S17_vs_k141_47560         | [full]    | 1961  | No | NA | 0  | 0 | Not-determined | Genome-fragment | NA    | 0 |
| S17_vs_k141_135783        | [full]    | 1733  | No | NA | 0  | 0 | Not-determined | Genome-fragment | NA    | 0 |
| S3_vs_k141_35594          | [in2gene] | 1053  | No | NA | 0  | 0 | Low-quality    | Genome-fragment | 1.78  | 0 |
| S3_vs_k141_4879           | [in2gene] | 1053  | No | NA | 1  | 0 | Low-quality    | Genome-fragment | 2.39  | 0 |
| S17_vs_k141_32731         | [full]    | 1295  | No | NA | 0  | 1 | Not-determined | Genome-fragment | NA    | 0 |
| S17_vs_k141_99249         | [full]    | 1729  | No | NA | 0  | 2 | Not-determined | Genome-fragment | NA    | 0 |
| S5_vs_k141_89800          | [full]    | 1053  | No | NA | 0  | 0 | Low-quality    | Genome-fragment | 1.77  | 0 |
| S7_vs_39023               | [full]    | 1053  | No | NA | 1  | 0 | Low-quality    | Genome-fragment | 2.72  | 0 |
| S16_vs_74218              | [full]    | 1053  | No | NA | 1  | 0 | Low-quality    | Genome-fragment | 1.59  | 0 |
| S10_extracted_21761       |           | 1053  | No | NA | 0  | 0 | Low-quality    | Genome-fragment | 0.97  | 0 |
| S17_vs_k141_121107        | [full]    | 2013  | No | NA | 0  | 2 | Not-determined | Genome-fragment | NA    | 0 |
| S17_vs_k141_135822        | [full]    | 2265  | No | NA | 0  | 1 | Not-determined | Genome-fragment | NA    | 0 |
| S17_vs_k141_143643        | [full]    | 28147 | No | NA | 0  | 0 | Not-determined | Genome-fragment | NA    | 0 |
| S17_vs_k141_121119        | [full]    | 7296  | No | NA | 0  | 1 | Not-determined | Genome-fragment | NA    | 0 |
| S17_vs_k141_40477         | [full]    | 1189  | No | NA | 0  | 2 | Not-determined | Genome-fragment | NA    | 0 |
| S12_vs_k141_175421        | [full]    | 1053  | No | NA | 0  | 0 | Low-quality    | Genome-fragment | 0.75  | 0 |
| S17_vs_k141_148657        | [full]    | 2675  | No | NA | 0  | 2 | Not-determined | Genome-fragment | NA    | 0 |
| S15_vs_60020              | [in2gene] | 1053  | No | NA | 0  | 0 | Low-quality    | Genome-fragment | 2.39  | 0 |
| S12_extracted_k141_597    |           | 1053  | No | NA | 0  | 0 | Low-quality    | Genome-fragment | 16.92 | 0 |
| S17_vs_k141_143665        | [full]    | 2460  | No | NA | 2  | 0 | Not-determined | Genome-fragment | NA    | 0 |
| S17_vs_k141_99346         | [full]    | 1104  | No | NA | 0  | 2 | Not-determined | Genome-fragment | NA    | 0 |
| S17_vs_k141_107017        | [full]    | 5514  | No | NA | 0  | 5 | Not-determined | Genome-fragment | NA    | 0 |
| S17_vs_k141_91533         | [full]    | 1938  | No | NA | 0  | 1 | Not-determined | Genome-fragment | NA    | 0 |
| S17_vs_k141_128287        | [full]    | 1063  | No | NA | 0  | 1 | Not-determined | Genome-fragment | NA    | 0 |
| S8_vs_k141_60654          | [full]    | 1053  | No | NA | 0  | 0 | Low-quality    | Genome-fragment | 2.36  | 0 |
| S17_vs_k141_7831          | [full]    | 1054  | No | NA | 0  | 0 | Low-quality    | Genome-fragment | 2.44  | 0 |
| S17_vs_k141_26385         | [full]    | 1054  | No | NA | 0  | 0 | Low-quality    | Genome-fragment | 2.11  | 0 |
| S14_extracted_k141_110487 |           | 1054  | No | NA | 2  | 0 | Low-quality    | Genome-fragment | NA    | 0 |
| S17_vs_k141_24943         | [full]    | 4386  | No | NA | 0  | 3 | Not-determined | Genome-fragment | NA    | 0 |
| S17_vs_k141_158356        | [full]    | 1313  | No | NA | 0  | 1 | Not-determined | Genome-fragment | NA    | 0 |
| S14_extracted_k141_97949  |           | 1054  | No | NA | 2  | 0 | Low-quality    | Genome-fragment | 3.12  | 0 |
| S17_vs_k141_17493         | [full]    | 1585  | No | NA | 0  | 0 | Not-determined | Genome-fragment | NA    | 0 |
| S17_vs_k141_113470        | [full]    | 1844  | No | NA | 0  | 2 | Not-determined | Genome-fragment | NA    | 0 |
| S14_extracted_k141_71120  |           | 1054  | No | NA | 1  | 0 | Low-quality    | Genome-fragment | 1.89  | 0 |
| S17_vs_k141_24989         | [full]    | 3139  | No | NA | 0  | 3 | Not-determined | Genome-fragment | NA    | 0 |
| S11_extracted_k141_85452  |           | 1054  | No | NA | 0  | 0 | Low-quality    | Genome-fragment | 1.09  | 0 |
| S1_extracted_k141_119607  |           | 1054  | No | NA | 0  | 0 | Low-quality    | Genome-fragment | 1.05  | 0 |
| S1_vs_k141_92661          | [full]    | 1054  | No | NA | 0  | 1 | Low-quality    | Genome-fragment | 1.65  | 0 |
| S3_vs_k141_61011          | [full]    | 1054  | No | NA | 1  | 0 | Low-quality    | Genome-fragment | 1.96  | 0 |
| S17_vs_k141_137746        | [full]    | 1142  | No | NA | 0  | 2 | Not-determined | Genome-fragment | NA    | 0 |
| S17_vs_k141_3053          | [full]    | 1501  | No | NA | 0  | 0 | Not-determined | Genome-fragment | NA    | 0 |
| S16_extracted_89665       |           | 1054  | No | NA | 1  | 0 | Low-quality    | Genome-fragment | 1.41  | 0 |
| S16_vs_24263              | [full]    | 1054  | No | NA | 0  | 0 | Low-quality    | Genome-fragment | 1.59  | 0 |
| S17_vs_k141_158480        | [full]    | 1625  | No | NA | 0  | 0 | Not-determined | Genome-fragment | NA    | 0 |
| S17_vs_k141_107231        | [full]    | 2096  | No | NA | 0  | 2 | Not-determined | Genome-fragment | NA    | 0 |
| S10_extracted_14471       |           | 1054  | No | NA | 0  | 0 | Low-quality    | Genome-fragment | 2.25  | 0 |
| S10_vs_108239             | [full]    | 1054  | No | NA | 0  | 0 | Low-quality    | Genome-fragment | 2.97  | 0 |
| S12_extracted_k141_126369 |           | 1054  | No | NA | 0  | 0 | Low-quality    | Genome-fragment | 1.27  | 0 |
| S12_extracted_k141_27289  |           | 1054  | No | NA | 0  | 0 | Low-quality    | Genome-fragment | NA    | 0 |
| S17_vs_k141_62031         | [full]    | 2844  | No | NA | 0  | 2 | Not-determined | Genome-fragment | NA    | 0 |
| S6_extracted_k141_49989   |           | 1054  | No | NA | 1  | 0 | Low-quality    | Genome-fragment | 2.26  | 0 |
| S17_vs_k141_3109          | [full]    | 3171  | No | NA | 0  | 2 | Not-determined | Genome-fragment | NA    | 0 |
| S8_extracted_k141_123252  |           | 1054  | No | NA | 0  | 1 | Low-quality    | Genome-fragment | 0.67  | 0 |
| S17_vs_k141_121345        | [full]    | 5794  | No | NA | 0  | 4 | Not-determined | Genome-fragment | NA    | 0 |
| S17_vs_k141_10723         | [full]    | 4730  | No | NA | 0  | 1 | Not-determined | Genome-fragment | NA    | 0 |
| S8_vs_k141_202469         | [full]    | 1054  | No | NA | 0  | 0 | Low-quality    | Genome-fragment | 2.34  | 0 |
| S17_extracted_k141_10115  |           | 1055  | No | NA | 0  | 0 | Low-quality    | Genome-fragment | 1.73  | 0 |
| S9_extracted_k141_30789   |           | 1055  | No | NA | 0  | 2 | Low-quality    | Genome-fragment | 0.58  | 0 |
| S17_vs_k141_69850         | [full]    | 5944  | No | NA | 0  | 0 | Not-determined | Genome-fragment | NA    | 0 |
| S11_extracted_k141_14389  |           | 1055  | No | NA | 0  | 0 | Low-quality    | Genome-fragment | 2.49  | 0 |
| S17_vs_k141_25100         | [full]    | 4648  | No | NA | 0  | 0 | Not-determined | Genome-fragment | NA    | 0 |
| S12_extracted_k141_128520 | [full]    | 3502  | No | NA | 0  | 3 | Not-determined | Genome-fragment | NA    | 0 |
| S13_extracted_153455      |           | 1055  | No | NA | 0  | 0 | Low-quality    | Genome-fragment | 1.6   | 0 |
| S17_vs_k141_151453        | [full]    | 3291  | No | NA | 0  | 2 | Not-determined | Genome-fragment | NA    | 0 |
| S1_vs_k141_8769           | [full]    | 1055  | No | NA | 0  | 0 | Low-quality    | Genome-fragment | 1.79  | 0 |
| S17_vs_k141_107298        | [full]    | 1176  | No | NA | 0  | 0 | Not-determined | Genome-fragment | NA    | 0 |
| S17_vs_k141_25117         | [full]    | 1214  | No | NA | 0  | 2 | Not-determined | Genome-fragment | NA    | 0 |
| S17_vs_k141_107307        | [full]    | 1198  | No | NA | 0  | 1 | Not-determined | Genome-fragment | NA    | 0 |
| S17_vs_k141_25121         | [full]    | 1609  | No | NA | 0  | 0 | Not-determined | Genome-fragment | NA    | 0 |
| S17_vs_k141_128574        | [full]    | 1377  | No | NA | 0  | 1 | Not-determined | Genome-fragment | NA    | 0 |
| S3_vs_k141_58041          | [full]    | 1055  | No | NA | 0  | 1 | Low-quality    | Genome-fragment | 1.74  | 0 |
| S5_vs_k141_50144          | [full]    | 1055  | No | NA | 1  | 0 | Low-quality    | Genome-fragment | 1.75  | 0 |
| S17_vs_k141_172925        | [full]    | 4853  | No | NA | 0  | 3 | Not-determined | Genome-fragment | NA    | 0 |
| S17_vs_k141_136057        | [full]    | 8893  | No | NA | 0  | 2 | Not-determined | Genome-fragment | NA    | 0 |
| S17_vs_k141_10796         | [full]    | 2327  | No | NA | 0  | 2 | Not-determined | Genome-fragment |       |   |



|                           |       |    |    |   |    |                |                 |       |      |
|---------------------------|-------|----|----|---|----|----------------|-----------------|-------|------|
| S13_vs_126828  full       | 1056  | No | NA | 0 | 0  | Low-quality    | Genome-fragment | 0.62  | 0    |
| S17_vs_k141_59815  full   | 1613  | No | NA | 0 | 1  | Not-determined | Genome-fragment | NA    | 0    |
| S17_vs_k141_77403  full   | 1033  | No | NA | 0 | 2  | Not-determined | Genome-fragment | NA    | 0    |
| S17_vs_k141_25322  full   | 1392  | No | NA | 0 | 0  | Not-determined | Genome-fragment | NA    | 0    |
| S17_vs_k141_33842  full   | 1516  | No | NA | 0 | 1  | Not-determined | Genome-fragment | NA    | 0    |
| S17_vs_k141_40965  full   | 2693  | No | NA | 0 | 1  | Not-determined | Genome-fragment | NA    | 0    |
| S17_vs_k141_18017  full   | 2038  | No | NA | 0 | 1  | Not-determined | Genome-fragment | NA    | 0    |
| S17_vs_k141_158876  full  | 2418  | No | NA | 0 | 0  | Not-determined | Genome-fragment | NA    | 0    |
| S17_vs_k141_126820  full  | 2482  | No | NA | 0 | 0  | Not-determined | Genome-fragment | NA    | 0    |
| S17_vs_k141_121617  full  | 1473  | No | NA | 0 | 0  | Not-determined | Genome-fragment | NA    | 0    |
| S14_extracted_k141_76193  | 1056  | No | NA | 0 | 1  | Low-quality    | Genome-fragment | 0.71  | 0    |
| S17_vs_k141_158911  full  | 1660  | No | NA | 0 | 0  | Not-determined | Genome-fragment | NA    | 0    |
| S17_vs_k141_25377  full   | 2754  | No | NA | 0 | 1  | Not-determined | Genome-fragment | NA    | 0    |
| S14_vs_k141_43337  full   | 1056  | No | NA | 0 | 2  | Low-quality    | Genome-fragment | 0.62  | 0    |
| S14_vs_k141_36175  H2gene | 1056  | No | NA | 1 | 0  | Low-quality    | Genome-fragment | 1.7   | 0    |
| S17_vs_k141_25387  full   | 1054  | No | NA | 0 | 1  | Not-determined | Genome-fragment | NA    | 0    |
| S17_vs_k141_114181  full  | 1436  | No | NA | 0 | 1  | Not-determined | Genome-fragment | NA    | 0    |
| S11_extracted_k141_102343 | 1056  | No | NA | 0 | 0  | Low-quality    | Genome-fragment | 0.69  | 0    |
| S17_vs_k141_48200  full   | 1320  | No | NA | 0 | 0  | Not-determined | Genome-fragment | NA    | 0    |
| S3_extracted_k141_117065  | 1056  | No | NA | 3 | 0  | Low-quality    | Genome-fragment | 3.48  | 0    |
| S3_vs_k141_869  full      | 1056  | No | NA | 1 | 0  | Low-quality    | Genome-fragment | 1.73  | 0    |
| S3_vs_k141_57651  H2gene  | 1056  | No | NA | 1 | 0  | Low-quality    | Genome-fragment | 0.95  | 0    |
| S7_vs_117612  full        | 1056  | No | NA | 0 | 0  | Low-quality    | Genome-fragment | 3.01  | 0    |
| S17_vs_k141_62378  full   | 1672  | No | NA | 0 | 0  | Not-determined | Genome-fragment | NA    | 0    |
| S17_vs_k141_62385  full   | 1104  | No | NA | 0 | 1  | Not-determined | Genome-fragment | NA    | 0    |
| S7_vs_71477  H2gene       | 1056  | No | NA | 0 | 1  | Low-quality    | Genome-fragment | NA    | 0    |
| S17_vs_k141_173285  full  | 1092  | No | NA | 0 | 1  | Not-determined | Genome-fragment | NA    | 1.4  |
| S10_vs_108870  full       | 1056  | No | NA | 0 | 1  | Low-quality    | Genome-fragment | 0.66  | 0    |
| S17_vs_k141_62599  full   | 4343  | No | NA | 0 | 1  | Not-determined | Genome-fragment | NA    | 0    |
| S17_vs_k141_55472  full   | 1039  | No | NA | 0 | 0  | Not-determined | Genome-fragment | NA    | 0    |
| S17_vs_k141_173300  full  | 4591  | No | NA | 0 | 3  | Not-determined | Genome-fragment | NA    | 0    |
| S17_vs_k141_62406  full   | 3543  | No | NA | 0 | 1  | Not-determined | Genome-fragment | NA    | 0    |
| S17_vs_k141_33450  full   | 1879  | No | NA | 0 | 2  | Not-determined | Genome-fragment | NA    | 0    |
| S17_vs_k141_48255  full   | 2180  | No | NA | 0 | 0  | Not-determined | Genome-fragment | NA    | 0    |
| S17_vs_k141_25462  full   | 3423  | No | NA | 0 | 0  | Not-determined | Genome-fragment | NA    | 0    |
| S17_vs_k141_62429  full   | 1545  | No | NA | 0 | 1  | Not-determined | Genome-fragment | NA    | 0    |
| S17_vs_k141_136436  full  | 7964  | No | NA | 0 | 1  | Not-determined | Genome-fragment | NA    | 0    |
| S12_vs_k141_88342  full   | 1056  | No | NA | 1 | 0  | Low-quality    | Genome-fragment | 1.9   | 0    |
| S17_vs_k141_165992  full  | 1114  | No | NA | 0 | 1  | Not-determined | Genome-fragment | NA    | 0    |
| S17_vs_k141_165993  full  | 1729  | No | NA | 0 | 1  | Not-determined | Genome-fragment | NA    | 0    |
| S12_vs_k141_46813  full   | 1056  | No | NA | 0 | 1  | Low-quality    | Genome-fragment | 1.92  | 0    |
| S17_vs_k141_84197  full   | 2189  | No | NA | 0 | 0  | Not-determined | Genome-fragment | NA    | 0    |
| S15_extracted_66338       | 1056  | No | NA | 0 | 1  | Low-quality    | Genome-fragment | 0.74  | 0    |
| S17_vs_k141_92127  full   | 1269  | No | NA | 0 | 0  | Not-determined | Genome-fragment | NA    | 0    |
| S17_vs_k141_114220  full  | 21659 | No | NA | 0 | 17 | Not-determined | Genome-fragment | NA    | 0    |
| S15_vs_25500  full        | 1056  | No | NA | 0 | 0  | Low-quality    | Genome-fragment | NA    | 0.83 |
| S17_vs_k141_166017  full  | 3894  | No | NA | 0 | 1  | Not-determined | Genome-fragment | NA    | 0    |
| S17_vs_k141_92130  full   | 3412  | No | NA | 0 | 3  | Not-determined | Genome-fragment | NA    | 0    |
| S17_vs_k141_48290  full   | 1751  | No | NA | 0 | 0  | Not-determined | Genome-fragment | NA    | 0    |
| S17_vs_k141_3566  full    | 2839  | No | NA | 0 | 1  | Not-determined | Genome-fragment | NA    | 0    |
| S8_vs_k141_81267  full    | 1056  | No | NA | 1 | 0  | Low-quality    | Genome-fragment | 2.56  | 0    |
| S17_extracted_k141_82324  | 1057  | No | NA | 0 | 1  | Low-quality    | Genome-fragment | 3.47  | 0    |
| S17_vs_k141_84214  full   | 6444  | No | NA | 0 | 3  | Not-determined | Genome-fragment | NA    | 0    |
| S17_vs_k141_9983  full    | 1057  | No | NA | 1 | 0  | Low-quality    | Genome-fragment | 2.03  | 0    |
| S17_vs_k141_11011  full   | 16698 | No | NA | 0 | 11 | Not-determined | Genome-fragment | NA    | 0    |
| S17_vs_k141_26407  full   | 1057  | No | NA | 0 | 0  | Low-quality    | Genome-fragment | NA    | 0.82 |
| S17_vs_k141_55538  full   | 1415  | No | NA | 0 | 0  | Not-determined | Genome-fragment | NA    | 0    |
| S17_vs_k141_41099  full   | 1045  | No | NA | 0 | 1  | Not-determined | Genome-fragment | NA    | 0    |
| S17_vs_k141_128985  full  | 2353  | No | NA | 0 | 0  | Not-determined | Genome-fragment | NA    | 0    |
| S17_vs_k141_128992  full  | 2016  | No | NA | 0 | 1  | Not-determined | Genome-fragment | NA    | 0    |
| S9_extracted_k141_78483   | 1057  | No | NA | 3 | 0  | Low-quality    | Genome-fragment | 1.7   | 0    |
| S17_vs_k141_2609  full    | 2404  | No | NA | 0 | 0  | Not-determined | Genome-fragment | NA    | 0    |
| S17_vs_k141_166050  full  | 3224  | No | NA | 0 | 0  | Not-determined | Genome-fragment | NA    | 0    |
| S17_vs_k141_114311  full  | 1986  | No | NA | 0 | 0  | Not-determined | Genome-fragment | NA    | 0    |
| S17_vs_k141_151849  full  | 1615  | No | NA | 0 | 1  | Not-determined | Genome-fragment | NA    | 0    |
| S11_vs_k141_33160  full   | 1057  | No | NA | 0 | 0  | Low-quality    | Genome-fragment | 2.1   | 0    |
| S11_vs_k141_51279  H2gene | 1057  | No | NA | 1 | 0  | Low-quality    | Genome-fragment | 2.59  | 0    |
| S13_extracted_27958       | 1057  | No | NA | 0 | 1  | Low-quality    | Genome-fragment | 1.22  | 0    |
| S13_vs_29356  full        | 1057  | No | NA | 0 | 0  | Low-quality    | Genome-fragment | 1.88  | 0    |
| S17_vs_k141_121763  full  | 1941  | No | NA | 0 | 1  | Not-determined | Genome-fragment | NA    | 0    |
| S17_vs_k141_114365  full  | 1255  | No | NA | 0 | 1  | Not-determined | Genome-fragment | NA    | 0    |
| S17_vs_k141_114367  full  | 1604  | No | NA | 0 | 1  | Not-determined | Genome-fragment | NA    | 0    |
| S13_vs_49000  full        | 1057  | No | NA | 0 | 0  | Low-quality    | Genome-fragment | 0.94  | 0    |
| S17_vs_k141_62501  full   | 4229  | No | NA | 0 | 3  | Not-determined | Genome-fragment | NA    | 0    |
| S1_vs_k141_82686  full    | 1057  | No | NA | 0 | 0  | Low-quality    | Genome-fragment | NA    | 0.68 |
| S17_vs_k141_18300  full   | 3334  | No | NA | 0 | 0  | Not-determined | Genome-fragment | NA    | 0    |
| S17_vs_k141_3728  full    | 1385  | No | NA | 0 | 1  | Not-determined | Genome-fragment | NA    | 0    |
| S8_extracted_k141_116160  | 1057  | No | NA | 0 | 0  | Low-quality    | Genome-fragment | NA    | 1.81 |
| S17_vs_k141_98979  full   | 1155  | No | NA | 0 | 0  | Not-determined | Genome-fragment | NA    | 0    |
| S17_vs_k141_11165  full   | 1257  | No | NA | 0 | 0  | Not-determined | Genome-fragment | NA    | 0    |
| S3_vs_k141_18643  full    | 1057  | No | NA | 0 | 0  | Low-quality    | Genome-fragment | NA    | 1.32 |
| S17_vs_k141_166157  full  | 2140  | No | NA | 0 | 1  | Not-determined | Genome-fragment | NA    | 0    |
| S17_vs_k141_33677  full   | 3377  | No | NA | 0 | 3  | Not-determined | Genome-fragment | NA    | 0    |
| S5_vs_k141_130524  full   | 1057  | No | NA | 0 | 0  | Low-quality    | Genome-fragment | 2.46  | 0    |
| S5_vs_k141_5887  full     | 1057  | No | NA | 0 | 0  | Low-quality    | Genome-fragment | 0.61  | 0    |
| S7_vs_110557  H2gene      | 1057  | No | NA | 1 | 0  | Low-quality    | Genome-fragment | 2.46  | 0    |
| S17_vs_k141_11187  full   | 1751  | No | NA | 0 | 0  | Not-determined | Genome-fragment | NA    | 0    |
| S17_vs_k141_3771  full    | 1151  | No | NA | 0 | 0  | Not-determined | Genome-fragment | NA    | 2.76 |
| S16_extracted_80187       | 1057  | No | NA | 0 | 0  | Low-quality    | Genome-fragment | 1.68  | 0    |
| S16_extracted_105478      | 1057  | No | NA | 0 | 0  | Low-quality    | Genome-fragment | 1.95  | 0    |
| S16_vs_6644  full         | 1057  | No | NA | 1 | 0  | Low-quality    | Genome-fragment | NA    | 0    |
| S17_vs_k141_3780  full    | 2161  | No | NA | 0 | 1  | Not-determined | Genome-fragment | NA    | 0    |
| S17_vs_k141_77718  full   | 1437  | No | NA | 0 | 0  | Not-determined | Genome-fragment | NA    | 0    |
| S16_vs_106899  full       | 1057  | No | NA | 0 | 0  | Low-quality    | Genome-fragment | 1.88  | 0    |
| S16_vs_115489  full       | 1057  | No | NA | 0 | 0  | Low-quality    | Genome-fragment | NA    | 0    |
| S17_vs_k141_41300  full   | 2337  | No | NA | 0 | 1  | Not-determined | Genome-fragment | NA    | 0    |
| S16_vs_143020  full       | 1057  | No | NA | 0 | 0  | Low-quality    | Genome-fragment | 1.34  | 0    |
| S10_vs_20372  full        | 1057  | No | NA | 1 | 0  | Low-quality    | Genome-fragment | 1.55  | 0    |
| S17_vs_k141_435965  full  | 1058  | No | NA | 1 | 0  | Low-quality    | Genome-fragment | NA    | 0    |
| S17_vs_k141_136524  full  | 1246  | No | NA | 0 | 0  | Not-determined | Genome-fragment | NA    | 0    |
| S9_extracted_k141_52850   | 1058  | No | NA | 2 | 0  | Low-quality    | Genome-fragment | NA    | 3.49 |
| S17_vs_k141_25550  full   | 2296  | No | NA | 0 | 2  | Not-determined | Genome-fragment | NA    | 0    |
| S17_vs_k141_77779  full   | 1269  | No | NA | 0 | 1  | Not-determined | Genome-fragment | NA    | 0    |
| S17_vs_k141_33791  full   | 1739  | No | NA | 0 | 0  | Not-determined | Genome-fragment | NA    | 0    |
| S9_vs_k141_30611  full    | 1058  | No | NA | 0 | 0  | Low-quality    | Genome-fragment | 1.87  | 0    |
| S17_vs_k141_107832  full  | 1344  | No | NA | 0 | 0  | Not-determined | Genome-fragment | NA    | 0    |
| S9_vs_k141_83938  H2gene  | 1058  | No | NA | 1 | 0  | Low-quality    | Genome-fragment | 25.42 | 0    |
| S17_vs_k141_77818  full   | 4201  | No | NA | 0 | 3  | Not-determined | Genome-fragment | NA    | 2.33 |
| S14_extracted_k141_10271  | 1058  | No | NA | 0 | 1  | Low-quality    | Genome-fragment | NA    | 0    |
| S14_vs_k141_55203  H2gene | 1058  | No | NA | 1 | 0  | Low-quality    | Genome-fragment | 1.55  | 0    |
| S17_vs_k141_152063  full  | 1205  | No | NA | 0 | 1  | Not-determined | Genome-fragment | NA    | 0    |
| S14_vs_k141_33399  H2gene | 1058  | No | NA | 0 | 0  | Low-quality    | Genome-fragment | 2.46  | 0    |
| S17_vs_k141_18502  full   | 1370  | No | NA | 0 | 2  | Not-determined | Genome-fragment | NA    | 0    |
| S16_extracted_113958      | 1058  | No | NA | 0 | 0  | Low-quality    | Genome-fragment | 0.79  | 0    |
| S16_extracted_162756      | 1058  | No | NA | 0 | 1  | Low-quality    | Genome-fragment | 1.61  | 0    |
| S17_vs_k141_152065  full  | 7120  | No | NA | 0 | 4  | Not-determined | Genome-fragment | NA    | 0    |
| S16_vs_123264  full       | 1058  | No | NA | 1 | 0  | Low-quality    | Genome-fragment | 3.1   | 0    |
| S17_vs_k141_166296  full  | 2673  | No | NA | 0 | 4  | Not-determined | Genome-fragment | NA    | 0    |
| S17_vs_k141_77836  full   | 2610  | No | NA | 0 | 1  | Not-determined | Genome-fragment | NA    | 0    |
| S10_extracted_85023       | 1058  | No | NA | 0 | 0  | Low-quality    | Genome-fragment | 2.58  | 0    |
| S12_extracted_k141_28338  | 1058  | No | NA | 2 | 0  | Low-quality    | Genome-fragment | 3.02  | 0    |
| S17_vs_k141_55828  full   | 1514  | No | NA | 0 | 2  | Not-determined | Genome-fragment | NA    | 0    |
| S12_extracted_k141_123574 | 1058  | No | NA | 0 | 0  | Low-quality    | Genome-fragment | 0.4   | 0    |
| S15_extracted_41870       | 1058  | No | NA | 1 | 0  | Low-quality    | Genome-fragment | 1.71  | 0    |
| S17_vs_k141_18509  full   | 26539 | No | NA | 7 | 0  | Not-determined | Genome-fragment | NA    | 0    |
| S17_vs_k141_121950  full  | 2302  | No | NA | 0 | 0  | Not-determined | Genome-fragment | NA    | 0    |
| S17_vs_k141_33879  full   | 4685  | No | NA | 0 | 2  | Not-determined | Genome-fragment | NA    | 0    |
| S17_vs_k141_114668  full  | 2270  | No | NA | 0 | 0  | Not-determined | Genome-fragment | NA    | 0    |
| S15_vs_71951  full        | 1058  | No | NA | 0 | 1  | Low-quality    | Genome-fragment | 1.59  | 0    |
| S17_vs_k141_48618  full   | 3009  | No | NA | 0 | 0  | Not-determined | Genome-fragment | NA    | 0    |
| S8_vs_k141_27511  full    | 1058  | No | NA | 1 | 0  | Low-quality    | Genome-fragment | 2.79  | 0    |
| S17_vs_k141_11551  full   | 2840  | No | NA | 2 | 0  | Not-determined | Genome-fragment | NA    | 0    |
| S17_vs_k141_100230  full  | 1213  | No | NA | 0 | 0  | Not-determined | Genome-fragment | NA    | 0    |
| S17_extracted_k141_16716  | 1059  | No | NA | 0 | 0  | Low-quality    | Genome-fragment | 0.75  | 0    |
| S17_vs_k141_100238  full  | 1523  | No | NA | 0 | 1  | Not-determined | Genome-fragment | NA    | 0    |
| S17_vs_k141_70672  full   | 3505  | No | NA | 0 | 0  | Not-determined | Genome-fragment | NA    | 0    |
| S17_extracted_k141_47771  | 1059  | No | NA | 0 | 0  | Low-quality    | Genome-fragment | 1.67  | 0    |
| S9_extracted_k141_21862   | 1059  | No | NA | 1 | 0  | Low-quality    | Genome-fragment | 2.26  | 0    |
| S17_vs_k141_41492  full   | 1012  | No | NA | 0 | 1  | Not-determined | Genome-fragment | NA    | 0    |
| S17_vs_k141_77993  full   | 1730  | No | NA | 0 | 1  | Not-determined | Genome-fragment | NA    | 0    |
| S17_vs_k141_136760  full  | 5057  | No | NA | 0 | 1  | Not-determined | Genome-fragment | NA    | 0    |
| S17_vs_k141_41534  full   | 1789  | No | NA | 0 | 2  | Not-determined | Genome-fragment | NA    | 0    |
| S11_extracted_k141_16131  | 1059  | No | NA | 0 | 0  | Low-quality    | Genome-fragment | 1.42  | 0    |
| S14_extracted_k141_58365  | 105   |    |    |   |    |                |                 |       |      |



|                                |       |    |    |    |   |                |                 |       |   |
|--------------------------------|-------|----|----|----|---|----------------|-----------------|-------|---|
| S9_vs_k141_409761 full         | 1060  | No | NA | 2  | 0 | Low-quality    | Genome-fragment | 2.91  | 0 |
| S17_vs_k141_1524551 full       | 2020  | No | NA | 0  | 0 | Not-determined | Genome-fragment | NA    | 0 |
| S17_vs_k141_1666261 full       | 1687  | No | NA | 0  | 0 | Not-determined | Genome-fragment | NA    | 0 |
| S17_vs_k141_1737671 full       | 1935  | No | NA | 0  | 0 | Not-determined | Genome-fragment | NA    | 0 |
| S13_extracted_k141_101237      | 1060  | No | NA | 1  | 0 | Low-quality    | Genome-fragment | 2.8   | 0 |
| S1_extracted_k141_1024321 full | 1060  | No | NA | 0  | 0 | Low-quality    | Genome-fragment | 0.5   | 0 |
| S17_vs_k141_108931 full        | 2090  | No | NA | 0  | 1 | Not-determined | Genome-fragment | 1.22  | 0 |
| S1_vs_k141_1144561 H2gene      | 1060  | No | NA | 1  | 0 | Low-quality    | Genome-fragment | 1.49  | 0 |
| S17_vs_k141_1524791 full       | 2283  | No | NA | 0  | 0 | Not-determined | Genome-fragment | NA    | 0 |
| S17_vs_k141_115471 full        | 1685  | No | NA | 0  | 1 | Not-determined | Genome-fragment | NA    | 0 |
| S17_vs_k141_1004781 full       | 22154 | No | NA | 0  | 7 | Not-determined | Genome-fragment | NA    | 0 |
| S17_vs_k141_1296671 full       | 2348  | No | NA | 0  | 0 | Not-determined | Genome-fragment | NA    | 0 |
| S3_vs_k141_602061 full         | 1060  | No | NA | 3  | 0 | Low-quality    | Genome-fragment | 1.74  | 0 |
| S17_vs_k141_1005031 full       | 1569  | No | NA | 0  | 2 | Not-determined | Genome-fragment | NA    | 0 |
| S17_vs_k141_161851 full        | 1224  | No | NA | 0  | 0 | Not-determined | Genome-fragment | NA    | 0 |
| S17_vs_k141_1296871 full       | 7736  | No | NA | 0  | 8 | Not-determined | Genome-fragment | NA    | 0 |
| S17_vs_k141_1369681 full       | 2828  | No | NA | 0  | 0 | Not-determined | Genome-fragment | NA    | 0 |
| S2_vs_k141_1104951 full        | 1060  | No | NA | 1  | 0 | Low-quality    | Genome-fragment | 1.53  | 0 |
| S17_vs_k141_927701 full        | 1169  | No | NA | 0  | 0 | Not-determined | Genome-fragment | NA    | 0 |
| S17_vs_k141_259401 full        | 5251  | No | NA | 0  | 0 | Not-determined | Genome-fragment | NA    | 0 |
| S17_vs_k141_259471 full        | 2172  | No | NA | 0  | 2 | Not-determined | Genome-fragment | NA    | 0 |
| S5_extracted_k141_93184        | 1060  | No | NA | 1  | 0 | Low-quality    | Genome-fragment | 2.86  | 0 |
| S17_vs_k141_1083721 full       | 8279  | No | NA | 0  | 2 | Not-determined | Genome-fragment | NA    | 0 |
| S17_vs_k141_1297151 full       | 2844  | No | NA | 0  | 2 | Not-determined | Genome-fragment | NA    | 0 |
| S5_vs_k141_1269341 full        | 1060  | No | NA | 0  | 1 | Low-quality    | Genome-fragment | 0.78  | 0 |
| S17_vs_k141_162271 full        | 1672  | No | NA | 0  | 1 | Not-determined | Genome-fragment | NA    | 0 |
| S17_vs_k141_115771 full        | 1758  | No | NA | 0  | 1 | Not-determined | Genome-fragment | NA    | 0 |
| S17_vs_k141_1221941 full       | 5526  | No | NA | 1  | 4 | Not-determined | Genome-fragment | NA    | 0 |
| S5_vs_k141_966371 full         | 1060  | No | NA | 1  | 0 | Low-quality    | Genome-fragment | 0.67  | 0 |
| S7_vs_390761 full              | 1060  | No | NA | 1  | 0 | Low-quality    | Genome-fragment | 2.55  | 0 |
| S7_vs_394471 full              | 2060  | No | NA | 1  | 1 | Low-quality    | Genome-fragment | 1.71  | 0 |
| S17_vs_k141_1447201 full       | 2616  | No | NA | 0  | 2 | Not-determined | Genome-fragment | NA    | 0 |
| S17_vs_k141_1370391 full       | 1086  | No | NA | 0  | 1 | Not-determined | Genome-fragment | NA    | 0 |
| S17_vs_k141_847331 full        | 5566  | No | NA | 0  | 2 | Not-determined | Genome-fragment | NA    | 0 |
| S7_vs_700661 H2gene            | 1060  | No | NA | 0  | 0 | Low-quality    | Genome-fragment | 2.65  | 0 |
| S7_vs_825301 H2gene            | 1060  | No | NA | 1  | 0 | Low-quality    | Genome-fragment | 2.61  | 0 |
| S17_vs_k141_1793171 full       | 1515  | No | NA | 0  | 1 | Not-determined | Genome-fragment | NA    | 0 |
| S17_vs_k141_1739171 full       | 2462  | No | NA | 0  | 2 | Not-determined | Genome-fragment | NA    | 0 |
| S17_vs_k141_710321 full        | 1199  | No | NA | 0  | 1 | Not-determined | Genome-fragment | NA    | 0 |
| S16_extracted_33684            | 1060  | No | NA | 0  | 1 | Low-quality    | Genome-fragment | 0.49  | 0 |
| S17_vs_k141_242591 full        | 2097  | No | NA | 2  | 1 | Not-determined | Genome-fragment | NA    | 0 |
| S17_vs_k141_418451 full        | 37248 | No | NA | 18 | 2 | High-quality   | High-quality    | 100   | 0 |
| S17_vs_k141_1151361 full       | 1429  | No | NA | 0  | 2 | Not-determined | Genome-fragment | NA    | 0 |
| S17_vs_k141_1370881 full       | 4842  | No | NA | 0  | 0 | Not-determined | Genome-fragment | NA    | 0 |
| S16_vs_1088431 full            | 1060  | No | NA | 0  | 0 | Low-quality    | Genome-fragment | 3.13  | 0 |
| S17_vs_k141_1667521 full       | 1060  | No | NA | 1  | 0 | Low-quality    | Genome-fragment | 2.5   | 0 |
| S17_vs_k141_1523631 full       | 2239  | No | NA | 0  | 2 | Not-determined | Genome-fragment | NA    | 0 |
| S10_vs_683271 H2gene           | 1060  | No | NA | 0  | 0 | Low-quality    | Genome-fragment | 1.96  | 0 |
| S17_vs_k141_626351 full        | 2053  | No | NA | 0  | 1 | Not-determined | Genome-fragment | NA    | 0 |
| S12_extracted_k141_2159        | 1060  | No | NA | 2  | 0 | Low-quality    | Genome-fragment | 4.88  | 0 |
| S9_extracted_k141_58277        | 1061  | No | NA | 0  | 0 | Low-quality    | Genome-fragment | 0.64  | 0 |
| S17_vs_k141_1152001 full       | 2063  | No | NA | 0  | 2 | Not-determined | Genome-fragment | NA    | 0 |
| S11_vs_k141_863091 full        | 1061  | No | NA | 0  | 1 | Low-quality    | Genome-fragment | 1.21  | 0 |
| S11_vs_k141_575631 full        | 1061  | No | NA | 1  | 0 | Low-quality    | Genome-fragment | 1.26  | 0 |
| S1_extracted_k141_59913        | 1061  | No | NA | 0  | 1 | Low-quality    | Genome-fragment | 2.87  | 0 |
| S17_vs_k141_1298621 full       | 3228  | No | NA | 0  | 1 | Not-determined | Genome-fragment | NA    | 0 |
| S5_vs_k141_188251 full         | 1061  | No | NA | 1  | 0 | Low-quality    | Genome-fragment | 2.38  | 0 |
| S7_extracted_15696             | 1061  | No | NA | 1  | 0 | Low-quality    | Genome-fragment | 2.58  | 0 |
| S7_vs_208711 full              | 1061  | No | NA | 1  | 0 | Low-quality    | Genome-fragment | 2.19  | 0 |
| S7_vs_728551 full              | 1061  | No | NA | 1  | 0 | Low-quality    | Genome-fragment | 2.08  | 0 |
| S17_vs_k141_1637771 full       | 3619  | No | NA | 3  | 2 | Not-determined | Genome-fragment | NA    | 0 |
| S7_vs_455591 H2gene            | 1061  | No | NA | 1  | 0 | Low-quality    | Genome-fragment | 0.73  | 0 |
| S17_vs_k141_1448221 full       | 3614  | No | NA | 0  | 0 | Not-determined | Genome-fragment | NA    | 0 |
| S17_vs_k141_1152621 full       | 1327  | No | NA | 1  | 1 | Not-determined | Genome-fragment | NA    | 0 |
| S17_vs_k141_1085231 full       | 5831  | No | NA | 0  | 1 | Not-determined | Genome-fragment | NA    | 0 |
| S16_extracted_43610            | 1061  | No | NA | 0  | 1 | Low-quality    | Genome-fragment | 0.4   | 0 |
| S17_vs_k141_164581 full        | 1803  | No | NA | 0  | 0 | Not-determined | Genome-fragment | NA    | 0 |
| S17_vs_k141_929551 full        | 2738  | No | NA | 0  | 1 | Not-determined | Genome-fragment | NA    | 0 |
| S17_vs_k141_1598011 full       | 1111  | No | NA | 0  | 0 | Not-determined | Genome-fragment | NA    | 0 |
| S16_extracted_83869            | 1061  | No | NA | 0  | 0 | Low-quality    | Genome-fragment | 2.66  | 0 |
| S17_vs_k141_261831 full        | 1364  | No | NA | 2  | 1 | Not-determined | Genome-fragment | NA    | 0 |
| S16_extracted_107625           | 1061  | No | NA | 0  | 0 | Low-quality    | Genome-fragment | 0.2   | 0 |
| S17_vs_k141_1598121 full       | 4734  | No | NA | 0  | 4 | Not-determined | Genome-fragment | NA    | 0 |
| S17_vs_k141_492471 full        | 1208  | No | NA | 0  | 0 | Not-determined | Genome-fragment | NA    | 0 |
| S17_vs_k141_1153271 full       | 2522  | No | NA | 0  | 2 | Not-determined | Genome-fragment | NA    | 0 |
| S17_vs_k141_711911 full        | 2031  | No | NA | 0  | 1 | Not-determined | Genome-fragment | NA    | 0 |
| S16_vs_154961 full             | 1061  | No | NA | 0  | 1 | Low-quality    | Genome-fragment | 0.55  | 0 |
| S10_vs_80211 full              | 1061  | No | NA | 0  | 0 | Low-quality    | Genome-fragment | 2.88  | 0 |
| S17_vs_k141_628141 full        | 1771  | No | NA | 0  | 0 | Not-determined | Genome-fragment | NA    | 0 |
| S10_vs_1108921 full            | 1061  | No | NA | 0  | 1 | Low-quality    | Genome-fragment | 1.33  | 0 |
| S17_vs_k141_1660921 full       | 2328  | No | NA | 0  | 3 | Not-determined | Genome-fragment | NA    | 0 |
| S17_vs_k141_1372701 full       | 4843  | No | NA | 0  | 4 | Not-determined | Genome-fragment | NA    | 0 |
| S12_extracted_k141_57161       | 1061  | No | NA | 0  | 0 | Low-quality    | Genome-fragment | 11.67 | 0 |
| S17_vs_k141_344311 full        | 2138  | No | NA | 0  | 2 | Not-determined | Genome-fragment | NA    | 0 |
| S17_vs_k141_118091 full        | 2491  | No | NA | 0  | 0 | Not-determined | Genome-fragment | NA    | 0 |
| S8_vs_k141_481051 full         | 1061  | No | NA | 1  | 0 | Low-quality    | Genome-fragment | 2.42  | 0 |
| S17_extracted_k141_112107      | 1062  | No | NA | 0  | 1 | Low-quality    | Genome-fragment | 0.6   | 0 |
| S17_vs_k141_1598571 full       | 2442  | No | NA | 2  | 0 | Not-determined | Genome-fragment | NA    | 0 |
| S17_vs_k141_551701 H2gene      | 1062  | No | NA | 2  | 0 | Low-quality    | Genome-fragment | 3.12  | 0 |
| S9_vs_k141_375141 H2gene       | 1062  | No | NA | 1  | 0 | Low-quality    | Genome-fragment | 2.32  | 0 |
| S17_vs_k141_262391 full        | 3663  | No | NA | 0  | 1 | Not-determined | Genome-fragment | NA    | 0 |
| S17_vs_k141_262441 full        | 2700  | No | NA | 0  | 2 | Not-determined | Genome-fragment | NA    | 0 |
| S17_vs_k141_1222811 full       | 4063  | No | NA | 0  | 2 | Not-determined | Genome-fragment | NA    | 0 |
| S17_vs_k141_1740981 full       | 1684  | No | NA | 1  | 1 | Not-determined | Genome-fragment | NA    | 0 |
| S13_vs_902491 full             | 1062  | No | NA | 0  | 0 | Low-quality    | Genome-fragment | 2.01  | 0 |
| S1_vs_k141_484761 full         | 1062  | No | NA | 1  | 0 | Low-quality    | Genome-fragment | 2.6   | 0 |
| S17_vs_k141_166261 full        | 2387  | No | NA | 0  | 2 | Not-determined | Genome-fragment | NA    | 0 |
| S17_vs_k141_1373601 full       | 2525  | No | NA | 0  | 2 | Not-determined | Genome-fragment | NA    | 0 |
| S5_vs_k141_1163411 full        | 1062  | No | NA | 1  | 0 | Low-quality    | Genome-fragment | 1.76  | 0 |
| S7_extracted_10897             | 1062  | No | NA | 0  | 0 | Low-quality    | Genome-fragment | 2.53  | 0 |
| S17_vs_k141_191351 full        | 3363  | No | NA | 2  | 1 | Not-determined | Genome-fragment | NA    | 0 |
| S7_vs_664911 full              | 1062  | No | NA | 0  | 0 | Low-quality    | Genome-fragment | 2.53  | 0 |
| S17_vs_k141_1086391 full       | 9342  | No | NA | 0  | 3 | Not-determined | Genome-fragment | NA    | 0 |
| S17_vs_k141_1741341 full       | 6082  | No | NA | 1  | 1 | Not-determined | Genome-fragment | NA    | 0 |
| S16_vs_1059841 full            | 1062  | No | NA | 0  | 1 | Low-quality    | Genome-fragment | 0.83  | 0 |
| S17_vs_k141_1670941 full       | 2063  | No | NA | 0  | 0 | Not-determined | Genome-fragment | NA    | 0 |
| S10_vs_782971 full             | 1062  | No | NA | 0  | 0 | Low-quality    | Genome-fragment | 2.42  | 0 |
| S12_extracted_k141_34227       | 1062  | No | NA | 0  | 0 | Low-quality    | Genome-fragment | 0.59  | 0 |
| S17_vs_k141_191811 full        | 1126  | No | NA | 0  | 1 | Not-determined | Genome-fragment | NA    | 0 |
| S17_vs_k141_1454651 full       | 1023  | No | NA | 0  | 1 | Not-determined | Genome-fragment | NA    | 0 |
| S17_vs_k141_1599491 full       | 1216  | No | NA | 0  | 0 | Not-determined | Genome-fragment | NA    | 0 |
| S8_extracted_k141_140561       | 1062  | No | NA | 0  | 0 | Low-quality    | Genome-fragment | 2.28  | 0 |
| S17_vs_k141_263151 full        | 1521  | No | NA | 0  | 2 | Not-determined | Genome-fragment | NA    | 0 |
| S17_vs_k141_712421 full        | 3702  | No | NA | 0  | 2 | Not-determined | Genome-fragment | NA    | 0 |
| S17_vs_k141_263161 full        | 3004  | No | NA | 0  | 2 | Not-determined | Genome-fragment | NA    | 0 |
| S17_vs_k141_422141 full        | 2026  | No | NA | 0  | 2 | Not-determined | Genome-fragment | NA    | 0 |
| S17_vs_k141_1213651 full       | 1063  | No | NA | 0  | 0 | Low-quality    | Genome-fragment | 1.67  | 0 |
| S11_extracted_k141_17362       | 1063  | No | NA | 0  | 0 | Low-quality    | Genome-fragment | 1.87  | 0 |
| S14_vs_k141_398771 full        | 1063  | No | NA | 1  | 0 | Low-quality    | Genome-fragment | 2.21  | 0 |
| S17_vs_k141_1671391 full       | 1557  | No | NA | 0  | 1 | Not-determined | Genome-fragment | NA    | 0 |
| S1_extracted_k141_89113        | 1063  | No | NA | 1  | 0 | Low-quality    | Genome-fragment | 1.74  | 0 |
| S17_vs_k141_629571 full        | 4368  | No | NA | 0  | 2 | Not-determined | Genome-fragment | NA    | 0 |
| S17_vs_k141_428801 full        | 1063  | No | NA | 0  | 0 | Low-quality    | Genome-fragment | 2.48  | 0 |
| S17_vs_k141_712751 full        | 2068  | No | NA | 0  | 2 | Not-determined | Genome-fragment | NA    | 0 |
| S17_vs_k141_494241 full        | 1129  | No | NA | 0  | 1 | Not-determined | Genome-fragment | NA    | 0 |
| S17_vs_k141_1374791 full       | 1690  | No | NA | 0  | 2 | Not-determined | Genome-fragment | NA    | 0 |
| S17_vs_k141_931511 full        | 1160  | No | NA | 0  | 2 | Not-determined | Genome-fragment | NA    | 0 |
| S1_vs_k141_1121671 H2gene      | 1063  | No | NA | 2  | 0 | Low-quality    | Genome-fragment | 1.35  | 0 |
| S3_extracted_k141_9341         | 1063  | No | NA | 0  | 0 | Low-quality    | Genome-fragment | 0.85  | 0 |
| S17_vs_k141_45901 full         | 4596  | No | NA | 0  | 0 | Not-determined | Genome-fragment | NA    | 0 |
| S3_vs_k141_987041 full         | 1063  | No | NA | 0  | 0 | Low-quality    | Genome-fragment | 1.59  | 0 |
| S5_extracted_k141_40126        | 1063  | No | NA | 0  | 0 | Low-quality    | Genome-fragment | 1.46  | 0 |
| S17_vs_k141_851331 full        | 3137  | No | NA | 0  | 3 | Not-determined | Genome-fragment | NA    | 0 |
| S5_vs_k141_1246381 full        | 1063  | No | NA | 0  | 0 | Low-quality    | Genome-fragment | 1.93  | 0 |
| S7_vs_1192501 full             | 1063  | No | NA | 0  | 2 | Low-quality    | Genome-fragment | 0.28  | 0 |
| S17_vs_k141_714671 full        | 3446  | No | NA | 0  | 1 | Not-determined | Genome-fragment | NA    | 0 |
| S17_vs_k141_1375871 full       | 1465  | No | NA | 0  | 0 | Not-determined | Genome-fragment | NA    | 0 |
| S17_vs_k141_1600371 full       | 1951  | No | NA | 0  | 2 | Not-determined | Genome-fragment | NA    | 0 |
| S16_vs_866351 H2gene           | 1063  | No | NA | 1  | 0 | Low-quality    | Genome-fragment | 2.81  | 0 |
| S17_vs_k141_1010611 full       | 2238  | No | NA | 0  | 2 | Not-determined | Genome-fragment | NA    | 0 |
| S17_vs_k141_1600451 full       | 1814  | No | NA | 0  | 0 | Not-determined | Genome-fragment | NA    | 0 |
| S10_extracted_6449             | 1063  | No | NA | 0  | 0 | Low-quality    | Genome-fragment |       |   |



|                           |           |       |    |    |   |                |                 |                 |    |       |   |
|---------------------------|-----------|-------|----|----|---|----------------|-----------------|-----------------|----|-------|---|
| S17_vx_k141_78864         | [full]    | 2355  | No | NA | 0 | 3              | Not-determined  | Genome-fragment | NA | 0     | 0 |
| S10_vx_k141_19001         | [full]    | 1064  | No | NA | 0 | 1              | Low-quality     | Genome-fragment | NA | 2.17  | 0 |
| S17_vx_k141_78870         | [full]    | 3318  | No | NA | 0 | 0              | Not-determined  | Genome-fragment | NA | 0     | 0 |
| S17_vx_k141_56953         | [full]    | 1748  | No | NA | 0 | 1              | Not-determined  | Genome-fragment | NA | 0     | 0 |
| S17_vx_k141_56964         | [full]    | 2597  | No | NA | 0 | 2              | Not-determined  | Genome-fragment | NA | 0     | 0 |
| S17_vx_k141_48511         | [full]    | 3666  | No | NA | 0 | 1              | Not-determined  | Genome-fragment | NA | 0     | 0 |
| S17_vx_k141_85402         | [full]    | 2977  | No | NA | 0 | 0              | Not-determined  | Genome-fragment | NA | 0     | 0 |
| S17_vx_k141_26500         | [full]    | 2234  | No | NA | 0 | 2              | Not-determined  | Genome-fragment | NA | 0     | 0 |
| S17_vx_k141_93411         | [full]    | 1319  | No | NA | 0 | 1              | Not-determined  | Genome-fragment | NA | 0     | 0 |
| S17_vx_k141_49675         | [full]    | 1868  | No | NA | 0 | 2              | Not-determined  | Genome-fragment | NA | 0     | 0 |
| S17_vx_k141_130189        | [full]    | 1974  | No | NA | 0 | 1              | Not-determined  | Genome-fragment | NA | 0     | 0 |
| S2_vx_k141_29992          | [full]    | 1064  | No | NA | 0 | 0              | Low-quality     | Genome-fragment | NA | 3.01  | 0 |
| S17_vx_k141_42503         | [full]    | 1738  | No | NA | 2 | 0              | Not-determined  | Genome-fragment | NA | 0     | 0 |
| S17_vx_k141_35008         | [full]    | 1842  | No | NA | 0 | 2              | Not-determined  | Genome-fragment | NA | 0     | 0 |
| S17_vx_k141_42515         | [full]    | 1107  | No | NA | 0 | 1              | Not-determined  | Genome-fragment | NA | 0     | 0 |
| S17_vx_k141_101233        | [full]    | 3555  | No | NA | 0 | 0              | Not-determined  | Genome-fragment | NA | 0     | 0 |
| S17_vx_k141_153305        | [full]    | 3910  | No | NA | 0 | 2              | Not-determined  | Genome-fragment | NA | 0     | 0 |
| S17_vx_k141_78957         | [full]    | 1589  | No | NA | 0 | 2              | Not-determined  | Genome-fragment | NA | 0     | 0 |
| S17_vx_k141_35065         | [full]    | 2941  | No | NA | 0 | 2              | Not-determined  | Genome-fragment | NA | 0     | 0 |
| S8_vx_k141_274498         | [full]    | 1064  | No | NA | 0 | 0              | Low-quality     | Genome-fragment | NA | 2.47  | 0 |
| S17_vx_k141_78973         | [full]    | 1260  | No | NA | 0 | 0              | Not-determined  | Genome-fragment | NA | 0     | 0 |
| S17_vx_k141_115976        | [full]    | 1370  | No | NA | 0 | 0              | Not-determined  | Genome-fragment | NA | 0     | 0 |
| S17_extracted_k141_160862 |           | 1065  | No | NA | 0 | 0              | Low-quality     | Genome-fragment | NA | 1.49  | 0 |
| S17_vx_k141_45223         | [full]    | 1065  | No | NA | 0 | 1              | Low-quality     | Genome-fragment | NA | 0.75  | 0 |
| S17_vx_k141_167510        | [full]    | 1486  | No | NA | 0 | 1              | Not-determined  | Genome-fragment | NA | 0.62  | 0 |
| S9_extracted_k141_49929   |           | 1065  | No | NA | 0 | 0              | Low-quality     | Genome-fragment | NA | 0     | 0 |
| S17_vx_k141_109097        | [full]    | 3015  | No | NA | 0 | 3              | Not-determined  | Genome-fragment | NA | 0     | 0 |
| S17_vx_k141_137910        | [full]    | 1052  | No | NA | 0 | 1              | Not-determined  | Genome-fragment | NA | 0.63  | 0 |
| S11_extracted_k141_56870  |           | 1065  | No | NA | 0 | 2              | Not-determined  | Genome-fragment | NA | 0     | 0 |
| S17_vx_k141_63375         | [full]    | 2084  | No | NA | 0 | 2              | Not-determined  | Genome-fragment | NA | 0     | 0 |
| S17_vx_k141_71772         | [full]    | 2322  | No | NA | 0 | 0              | Not-determined  | Genome-fragment | NA | 0     | 0 |
| S17_vx_k141_4982          | [full]    | 4719  | No | NA | 0 | 1              | Not-determined  | Genome-fragment | NA | 0     | 0 |
| S14_extracted_k141_73676  |           | 1065  | No | NA | 0 | 0              | Low-quality     | Genome-fragment | NA | 1.63  | 0 |
| S17_vx_k141_145479        | [full]    | 2766  | No | NA | 0 | 1              | Not-determined  | Genome-fragment | NA | 0     | 0 |
| S17_vx_k141_19499         | [full]    | 2051  | No | NA | 0 | 0              | Not-determined  | Genome-fragment | NA | 0     | 0 |
| S17_vx_k141_145497        | [full]    | 1172  | No | NA | 0 | 1              | Not-determined  | Genome-fragment | NA | 1.92  | 0 |
| S17_vx_k141_19527         | [full]    | 1944  | No | NA | 0 | 0              | Not-determined  | Genome-fragment | NA | 0     | 0 |
| S17_vx_k141_49723         | [full]    | 2250  | No | NA | 0 | 2              | Not-determined  | Genome-fragment | NA | 0     | 0 |
| S17_vx_k141_122864        | [full]    | 1361  | No | NA | 0 | 3              | Not-determined  | Genome-fragment | NA | 0     | 0 |
| S11_extracted_k141_64402  |           | 1065  | No | NA | 0 | 0              | Low-quality     | Genome-fragment | NA | 1.53  | 0 |
| S11_extracted_k141_74495  |           | 1065  | No | NA | 1 | 0              | Low-quality     | Genome-fragment | NA | 2.22  | 0 |
| S17_vx_k141_42661         | [full]    | 1258  | No | NA | 0 | 1              | Not-determined  | Genome-fragment | NA | 0     | 0 |
| S17_vx_k141_138008        | [full]    | 1831  | No | NA | 0 | 1              | Not-determined  | Genome-fragment | NA | 0     | 0 |
| S17_vx_k141_51310         | [full]    | 2653  | No | NA | 0 | 2              | Not-determined  | Genome-fragment | NA | 0     | 0 |
| S17_vx_k141_174479        | [full]    | 6977  | No | NA | 0 | 4              | Not-determined  | Genome-fragment | NA | 0     | 0 |
| S17_vx_k141_138013        | [full]    | 1629  | No | NA | 0 | 2              | Not-determined  | Genome-fragment | NA | 0     | 0 |
| S17_vx_k141_167601        | [full]    | 1289  | No | NA | 0 | 2              | Not-determined  | Genome-fragment | NA | 0     | 0 |
| S17_vx_k141_116129        | [full]    | 1519  | No | NA | 0 | 0              | Not-determined  | Genome-fragment | NA | 0     | 0 |
| S17_vx_k141_167606        | [full]    | 2900  | No | NA | 0 | 2              | Not-determined  | Genome-fragment | NA | 0     | 0 |
| S17_vx_k141_138021        | [full]    | 2477  | No | NA | 0 | 2              | Not-determined  | Genome-fragment | NA | 0     | 0 |
| S17_vx_k141_71864         | [full]    | 2659  | No | NA | 0 | 0              | Not-determined  | Genome-fragment | NA | 0     | 0 |
| S1_vx_k141_84459          | [in2gene] | 1065  | No | NA | 0 | 0              | Low-quality     | Genome-fragment | NA | 3.12  | 0 |
| S17_vx_k141_57234         | [full]    | 4523  | No | NA | 1 | 1              | Not-determined  | Genome-fragment | NA | 0     | 0 |
| S17_vx_k141_42715         | [full]    | 1310  | No | NA | 0 | 0              | Not-determined  | Genome-fragment | NA | 0     | 0 |
| S17_vx_k141_49836         | [full]    | 1996  | No | NA | 0 | 0              | Not-determined  | Genome-fragment | NA | 0     | 0 |
| S3_extracted_k141_51822   |           | 1065  | No | NA | 0 | 0              | Low-quality     | Genome-fragment | NA | 0.7   | 0 |
| S17_vx_k141_85673         | [full]    | 1094  | No | NA | 0 | 0              | Not-determined  | Genome-fragment | NA | 0     | 0 |
| S7_extracted_35615        |           | 1065  | No | NA | 0 | 0              | Low-quality     | Genome-fragment | NA | 1.93  | 0 |
| S7_vx_52087               | [full]    | 1065  | No | NA | 0 | 1              | Low-quality     | Genome-fragment | NA | 1.82  | 0 |
| S7_vx_61176               | [full]    | 1065  | No | NA | 0 | 0              | Low-quality     | Genome-fragment | NA | 1.75  | 0 |
| S7_vx_124975              | [full]    | 1065  | No | NA | 0 | 0              | Low-quality     | Genome-fragment | NA | 1.29  | 0 |
| S16_extracted_142915      |           | 1065  | No | NA | 0 | 0              | Low-quality     | Genome-fragment | NA | 1.92  | 0 |
| S16_vx_28960              | [full]    | 1065  | No | NA | 0 | 0              | Low-quality     | Genome-fragment | NA | 0.56  | 0 |
| S17_vx_k141_153564        | [full]    | 1415  | No | NA | 0 | 2              | Not-determined  | Genome-fragment | NA | 0     | 0 |
| S17_vx_k141_42746         | [full]    | 4467  | No | NA | 4 | Not-determined | Genome-fragment | NA              | 0  | 0     |   |
| S16_vx_121844             | [full]    | 1065  | No | NA | 0 | 0              | Low-quality     | Genome-fragment | NA | 2.55  | 0 |
| S16_vx_171006             | [full]    | 1065  | No | NA | 1 | 0              | Low-quality     | Genome-fragment | NA | 2.09  | 0 |
| S12_vx_k141_83854         | [in2gene] | 1065  | No | NA | 1 | 0              | Low-quality     | Genome-fragment | NA | 2.11  | 0 |
| S17_vx_k141_35299         | [full]    | 1442  | No | NA | 1 | 0              | Not-determined  | Genome-fragment | NA | 2.98  | 0 |
| S17_extracted_k141_14995  |           | 1066  | No | NA | 1 | 0              | Low-quality     | Genome-fragment | NA | 0.32  | 0 |
| S17_vx_k141_63511         | [full]    | 3483  | No | NA | 0 | 1              | Not-determined  | Genome-fragment | NA | 0     | 0 |
| S17_vx_k141_116247        | [full]    | 1066  | No | NA | 0 | 0              | Not-determined  | Genome-fragment | NA | 0     | 0 |
| S17_extracted_k141_51481  |           | 1066  | No | NA | 0 | 1              | Low-quality     | Genome-fragment | NA | 0     | 0 |
| S17_vx_k141_85735         | [full]    | 1376  | No | NA | 0 | 0              | Not-determined  | Genome-fragment | NA | 0     | 0 |
| S17_vx_k141_31268         | [in2gene] | 1066  | No | NA | 0 | 0              | Low-quality     | Genome-fragment | NA | 1.93  | 0 |
| S17_vx_k141_71972         | [full]    | 3832  | No | NA | 0 | 1              | Not-determined  | Genome-fragment | NA | 0     | 0 |
| S17_vx_k141_160502        | [full]    | 37084 | No | NA | 6 | 1              | Medium-quality  | Genome-fragment | NA | 63.41 | 0 |
| S11_extracted_k141_42082  |           | 1066  | No | NA | 0 | 0              | Low-quality     | Genome-fragment | NA | 0.96  | 0 |
| S13_extracted_154021      |           | 1066  | No | NA | 0 | 0              | Low-quality     | Genome-fragment | NA | 1.96  | 0 |
| S14_extracted_k141_111522 |           | 1066  | No | NA | 0 | 0              | Low-quality     | Genome-fragment | NA | 1.95  | 0 |
| S14_vx_k141_39961         | [full]    | 1066  | No | NA | 2 | 0              | Low-quality     | Genome-fragment | NA | 2.95  | 0 |
| S17_vx_k141_123050        | [full]    | 1605  | No | NA | 0 | 1              | Not-determined  | Genome-fragment | NA | 0     | 0 |
| S17_vx_k141_63567         | [full]    | 1566  | No | NA | 0 | 0              | Not-determined  | Genome-fragment | NA | 0     | 0 |
| S1_vx_k141_12121          | [full]    | 1066  | No | NA | 1 | 0              | Low-quality     | Genome-fragment | NA | 1.34  | 0 |
| S17_vx_k141_122077        | [full]    | 1515  | No | NA | 0 | 2              | Not-determined  | Genome-fragment | NA | 0     | 0 |
| S17_vx_k141_130470        | [full]    | 1370  | No | NA | 0 | 2              | Not-determined  | Genome-fragment | NA | 0     | 0 |
| S1_vx_k141_106049         | [full]    | 1066  | No | NA | 2 | 0              | Low-quality     | Genome-fragment | NA | 2.47  | 0 |
| S17_vx_k141_174617        | [full]    | 4836  | No | NA | 0 | 2              | Not-determined  | Genome-fragment | NA | 0     | 0 |
| S5_extracted_k141_78054   |           | 1066  | No | NA | 0 | 1              | Low-quality     | Genome-fragment | NA | 1.18  | 0 |
| S17_vx_k141_26758         | [full]    | 2873  | No | NA | 0 | 2              | Not-determined  | Genome-fragment | NA | 0     | 0 |
| S17_vx_k141_79284         | [full]    | 5362  | No | NA | 0 | 4              | Not-determined  | Genome-fragment | NA | 3.04  | 0 |
| S5_vx_k141_50748          | [full]    | 1066  | No | NA | 0 | 0              | Low-quality     | Genome-fragment | NA | 1.76  | 0 |
| S5_vx_k141_9380           | [full]    | 1066  | No | NA | 1 | 0              | Low-quality     | Genome-fragment | NA | 0     | 0 |
| S17_vx_k141_160590        | [full]    | 1167  | No | NA | 0 | 1              | Not-determined  | Genome-fragment | NA | 2.64  | 0 |
| S7_vx_57064               | [full]    | 1066  | No | NA | 0 | 1              | Low-quality     | Genome-fragment | NA | 0     | 0 |
| S17_vx_k141_145688        | [full]    | 2180  | No | NA | 0 | 3              | Not-determined  | Genome-fragment | NA | 0     | 0 |
| S17_vx_k141_42860         | [full]    | 3909  | No | NA | 0 | 0              | Not-determined  | Genome-fragment | NA | 0     | 0 |
| S7_vx_96792               | [full]    | 1066  | No | NA | 0 | 0              | Low-quality     | Genome-fragment | NA | 2.37  | 0 |
| S17_vx_k141_26774         | [full]    | 5536  | No | NA | 0 | 2              | Not-determined  | Genome-fragment | NA | 0     | 0 |
| S17_vx_k141_12521         | [full]    | 8202  | No | NA | 0 | 3              | Not-determined  | Genome-fragment | NA | 0     | 0 |
| S17_vx_k141_125281        | [full]    | 1368  | No | NA | 0 | 2              | Not-determined  | Genome-fragment | NA | 0     | 0 |
| S17_vx_k141_153613        | [full]    | 2518  | No | NA | 0 | 1              | Not-determined  | Genome-fragment | NA | 0     | 0 |
| S17_vx_k141_125136        | [full]    | 2088  | No | NA | 0 | 0              | Not-determined  | Genome-fragment | NA | 0     | 0 |
| S17_vx_k141_85914         | [full]    | 1963  | No | NA | 0 | 2              | Not-determined  | Genome-fragment | NA | 2.45  | 0 |
| S7_vx_20194               | [in2gene] | 1066  | No | NA | 0 | 0              | Low-quality     | Genome-fragment | NA | 1.92  | 0 |
| S16_extracted_15520       |           | 1066  | No | NA | 0 | 2              | Not-determined  | Genome-fragment | NA | 0.57  | 0 |
| S17_vx_k141_93770         | [full]    | 4223  | No | NA | 0 | 2              | Low-quality     | Genome-fragment | NA | 0.62  | 0 |
| S10_extracted_40093       |           | 1066  | No | NA | 0 | 2              | Not-determined  | Genome-fragment | NA | 0.62  | 0 |
| S17_vx_k141_5401          | [full]    | 2542  | No | NA | 0 | 0              | Low-quality     | Genome-fragment | NA | 2.45  | 0 |
| S10_extracted_57163       |           | 1066  | No | NA | 0 | 2              | Not-determined  | Genome-fragment | NA | 0     | 0 |
| S17_vx_k141_160676        | [full]    | 3039  | No | NA | 0 | 3              | Not-determined  | Genome-fragment | NA | 2.52  | 0 |
| S12_extracted_k141_299    |           | 1066  | No | NA | 0 | 0              | Low-quality     | Genome-fragment | NA | 1.45  | 0 |
| S17_vx_k141_123195        | [full]    | 1709  | No | NA | 0 | 0              | Low-quality     | Genome-fragment | NA | 0     | 0 |
| S12_vx_k141_169357        | [full]    | 1066  | No | NA | 2 | 0              | Low-quality     | Genome-fragment | NA | 2.52  | 0 |
| S17_vx_k141_109558        | [full]    | 2159  | No | NA | 0 | 1              | Not-determined  | Genome-fragment | NA | 0     | 0 |
| S6_extracted_k141_42682   |           | 1066  | No | NA | 0 | 0              | Low-quality     | Genome-fragment | NA | 0     | 0 |
| S17_vx_k141_145811        | [full]    | 2683  | No | NA | 0 | 0              | Not-determined  | Genome-fragment | NA | 0.57  | 0 |
| S8_vx_k141_17177          | [in2gene] | 1066  | No | NA | 0 | 0              | Low-quality     | Genome-fragment | NA | 0     | 0 |
| S17_vx_k141_72104         | [full]    | 3372  | No | NA | 0 | 2              | Not-determined  | Genome-fragment | NA | 1.72  | 0 |
| S17_extracted_k141_52075  |           | 1067  | No | NA | 0 | 5              | Not-determined  | Genome-fragment | NA | 0.81  | 0 |
| S17_vx_k141_85962         | [full]    | 11079 | No | NA | 0 | 2              | Not-determined  | Genome-fragment | NA | 0     | 0 |
| S17_extracted_k141_76021  |           | 1067  | No | NA | 0 | 0              | Low-quality     | Genome-fragment | NA | 2.79  | 0 |
| S17_vx_k141_160741        | [full]    | 1537  | No | NA | 0 | 2              | Not-determined  | Genome-fragment | NA | 0     | 0 |
| S17_vx_k141_155014        | [full]    | 1067  | No | NA | 0 | 0              | Low-quality     | Genome-fragment | NA | 0     | 0 |
| S17_vx_k141_174752        | [full]    | 8617  | No | NA | 0 | 2              | Not-determined  | Genome-fragment | NA | 0     | 0 |
| S17_vx_k141_174758        | [full]    | 1602  | No | NA | 0 | 0              | Not-determined  | Genome-fragment | NA | 0.69  | 0 |
| S9_vx_k141_14419          | [full]    | 1067  | No | NA | 1 | 3              | Not-determined  | Genome-fragment | NA | 0     | 0 |
| S                         |           |       |    |    |   |                |                 |                 |    |       |   |



|                            |       |    |    |    |   |                |                 |    |       |
|----------------------------|-------|----|----|----|---|----------------|-----------------|----|-------|
| S17_vx_k141_130721  full   | 2637  | No | NA | 0  | 2 | Not-determined | Genome-fragment | NA | 0     |
| S17_vx_k141_174936  full   | 3030  | No | NA | 1  | 1 | Not-determined | Genome-fragment | NA | 0     |
| S13_vx_28431  full         | 1068  | No | NA | 0  | 0 | Low-quality    | Genome-fragment | NA | 1.99  |
| S14_vx_k141_85495  full    | 1068  | No | NA | 0  | 0 | Low-quality    | Genome-fragment | NA | 6.24  |
| S17_vx_k141_93957  full    | 2029  | No | NA | 0  | 2 | Not-determined | Genome-fragment | NA | 0     |
| S14_vx_k141_63984  full    | 1068  | No | NA | 0  | 0 | Low-quality    | Genome-fragment | NA | 2.18  |
| S17_vx_k141_161038  full   | 1714  | No | NA | 0  | 3 | Not-determined | Genome-fragment | NA | 0     |
| S17_vx_k141_57650  full    | 2168  | No | NA | 0  | 0 | Not-determined | Genome-fragment | NA | 0     |
| S14_vx_k141_90765  H2gene  | 1068  | No | NA | 0  | 0 | Low-quality    | Genome-fragment | NA | 2.77  |
| S1_vx_k141_55346  full     | 1068  | No | NA | 0  | 1 | Low-quality    | Genome-fragment | NA | 2.08  |
| S1_vx_k141_134739  H2gene  | 1068  | No | NA | 1  | 0 | Low-quality    | Genome-fragment | NA | 2.23  |
| S17_vx_k141_27108  full    | 1309  | No | NA | 0  | 0 | Not-determined | Genome-fragment | NA | 1.58  |
| S3_extracted_k141_45575    | 1068  | No | NA | 0  | 0 | Low-quality    | Genome-fragment | NA | 1.73  |
| S3_vx_k141_124683  full    | 1068  | No | NA | 2  | 0 | Low-quality    | Genome-fragment | NA | 1.77  |
| S5_vx_k141_133756  full    | 1068  | No | NA | 1  | 0 | Low-quality    | Genome-fragment | NA | 2.68  |
| S17_vx_k141_57551  full    | 1733  | No | NA | 0  | 0 | Not-determined | Genome-fragment | NA | 3.29  |
| S17_vx_k141_63999  full    | 1478  | No | NA | 0  | 2 | Not-determined | Genome-fragment | NA | 0     |
| S5_vx_k141_117809  full    | 1068  | No | NA | 0  | 0 | Low-quality    | Genome-fragment | NA | 2.56  |
| S5_vx_k141_92555  H2gene   | 1068  | No | NA | 2  | 0 | Low-quality    | Genome-fragment | NA | 2.27  |
| S17_vx_k141_161090  full   | 1804  | No | NA | 0  | 0 | Not-determined | Genome-fragment | NA | 1.93  |
| S7_vx_30328  full          | 1068  | No | NA | 2  | 0 | Low-quality    | Genome-fragment | NA | 2.48  |
| S7_vx_136428  full         | 1068  | No | NA | 0  | 0 | Low-quality    | Genome-fragment | NA | 1.99  |
| S16_vx_9347  full          | 1068  | No | NA | 0  | 0 | Low-quality    | Genome-fragment | NA | 2.84  |
| S16_vx_90939  full         | 1068  | No | NA | 1  | 0 | Low-quality    | Genome-fragment | NA | 0.34  |
| S12_vx_k141_95253  full    | 1068  | No | NA | 0  | 0 | Low-quality    | Genome-fragment | NA | 2.3   |
| S12_vx_k141_125410  full   | 1068  | No | NA | 0  | 0 | Low-quality    | Genome-fragment | NA | 0     |
| S17_vx_k141_5753  full     | 2907  | No | NA | 0  | 1 | Not-determined | Genome-fragment | NA | 0     |
| S6_extracted_k141_37223    | 1068  | No | NA | 0  | 1 | Low-quality    | Genome-fragment | NA | 0     |
| S6_extracted_k141_51098    | 1068  | No | NA | 0  | 0 | Low-quality    | Genome-fragment | NA | 3.05  |
| S17_vx_k141_123573  full   | 1088  | No | NA | 0  | 2 | Not-determined | Genome-fragment | NA | 0     |
| S6_vx_k141_56155  full     | 1068  | No | NA | 0  | 0 | Low-quality    | Genome-fragment | NA | 0     |
| S17_vx_k141_123621  full   | 4011  | No | NA | 0  | 2 | Not-determined | Genome-fragment | NA | 0     |
| S17_vx_k141_12881  full    | 3280  | No | NA | 0  | 0 | Not-determined | Genome-fragment | NA | 0     |
| S17_vx_k141_138575  full   | 1560  | No | NA | 0  | 1 | Not-determined | Genome-fragment | NA | 0     |
| S17_vx_k141_43300  full    | 1255  | No | NA | 0  | 0 | Not-determined | Genome-fragment | NA | 0     |
| S17_vx_k141_19974  full    | 1570  | No | NA | 0  | 0 | Not-determined | Genome-fragment | NA | 0     |
| S11_vx_k141_95490  full    | 1069  | No | NA | 0  | 0 | Low-quality    | Genome-fragment | NA | 1.88  |
| S11_vx_k141_36482  H2gene  | 1069  | No | NA | 2  | 0 | Low-quality    | Genome-fragment | NA | 1.3   |
| S17_vx_k141_168235  full   | 57169 | No | NA | 10 | 0 | Not-determined | Genome-fragment | NA | 0     |
| S17_vx_k141_27183  full    | 1632  | No | NA | 0  | 0 | Not-determined | Genome-fragment | NA | 0     |
| S13_vx_153118  full        | 1069  | No | NA | 0  | 3 | Low-quality    | Genome-fragment | NA | 0.33  |
| S14_extracted_k141_94958   | 1069  | No | NA | 0  | 0 | Low-quality    | Genome-fragment | NA | 2.56  |
| S17_vx_k141_50578  full    | 1234  | No | NA | 0  | 0 | Not-determined | Genome-fragment | NA | 0     |
| S14_vx_k141_53370  full    | 1069  | No | NA | 0  | 0 | Low-quality    | Genome-fragment | NA | 2.77  |
| S17_vx_k141_174992  full   | 1414  | No | NA | 0  | 0 | Not-determined | Genome-fragment | NA | 0     |
| S17_vx_k141_138920  full   | 1370  | No | NA | 0  | 2 | Not-determined | Genome-fragment | NA | 0     |
| S17_vx_k141_138634  full   | 1695  | No | NA | 0  | 2 | Not-determined | Genome-fragment | NA | 0     |
| S17_vx_k141_102068  full   | 16475 | No | NA | 0  | 2 | Not-determined | Genome-fragment | NA | 0     |
| S17_vx_k141_110068  full   | 4540  | No | NA | 0  | 2 | Not-determined | Genome-fragment | NA | 0     |
| S17_vx_k141_86370  full    | 3666  | No | NA | 0  | 3 | Not-determined | Genome-fragment | NA | 0     |
| S1_vx_k141_42858  full     | 1069  | No | NA | 0  | 2 | Low-quality    | Genome-fragment | NA | 0.68  |
| S17_vx_k141_86277  full    | 1716  | No | NA | 0  | 0 | Not-determined | Genome-fragment | NA | 0     |
| S17_vx_k141_43307  full    | 42499 | No | NA | 5  | 1 | Medium-quality | Genome-fragment | NA | 66.94 |
| S5_vx_k141_67019  full     | 1069  | No | NA | 2  | 0 | Low-quality    | Genome-fragment | NA | 2.44  |
| S16_extracted_125168       | 1069  | No | NA | 0  | 0 | Low-quality    | Genome-fragment | NA | 1.23  |
| S17_vx_k141_33957  full    | 3203  | No | NA | 0  | 0 | Not-determined | Genome-fragment | NA | 0     |
| S17_vx_k141_154186  full   | 4674  | No | NA | 0  | 1 | Not-determined | Genome-fragment | NA | 0     |
| S17_vx_k141_57762  full    | 5559  | No | NA | 0  | 2 | Not-determined | Genome-fragment | NA | 0     |
| S17_vx_k141_110100  full   | 1024  | No | NA | 0  | 0 | Not-determined | Genome-fragment | NA | 0     |
| S16_vx_14820  H2gene       | 1069  | No | NA | 2  | 0 | Low-quality    | Genome-fragment | NA | 2.24  |
| S17_vx_k141_27285  full    | 3403  | No | NA | 0  | 2 | Not-determined | Genome-fragment | NA | 0     |
| S17_vx_k141_35986  full    | 2375  | No | NA | 0  | 1 | Not-determined | Genome-fragment | NA | 0     |
| S17_vx_k141_123703  full   | 1880  | No | NA | 0  | 2 | Not-determined | Genome-fragment | NA | 0     |
| S17_vx_k141_79861  full    | 3497  | No | NA | 0  | 1 | Not-determined | Genome-fragment | NA | 0     |
| S17_vx_k141_64184  full    | 1015  | No | NA | 0  | 0 | Not-determined | Genome-fragment | NA | 0     |
| S17_vx_k141_146279  full   | 4454  | No | NA | 0  | 3 | Not-determined | Genome-fragment | NA | 0     |
| S17_vx_k141_161306  full   | 1357  | No | NA | 0  | 2 | Not-determined | Genome-fragment | NA | 0     |
| S17_vx_k141_146291  full   | 3160  | No | NA | 0  | 2 | Not-determined | Genome-fragment | NA | 0     |
| S17_vx_k141_79875  full    | 5986  | No | NA | 0  | 0 | Not-determined | Genome-fragment | NA | 0     |
| S10_vx_10905  H2gene       | 1069  | No | NA | 1  | 0 | Low-quality    | Genome-fragment | NA | 1.42  |
| S17_vx_k141_146308  full   | 2362  | No | NA | 0  | 0 | Not-determined | Genome-fragment | NA | 1.02  |
| S12_extracted_k141_1224    | 1069  | No | NA | 0  | 0 | Low-quality    | Genome-fragment | NA | 0     |
| S17_vx_k141_102193  full   | 2735  | No | NA | 0  | 1 | Not-determined | Genome-fragment | NA | 0     |
| S17_vx_k141_131017  full   | 1644  | No | NA | 0  | 2 | Not-determined | Genome-fragment | NA | 0     |
| S17_vx_k141_161338  full   | 2199  | No | NA | 0  | 1 | Not-determined | Genome-fragment | NA | 0     |
| S17_vx_k141_146333  full   | 2058  | No | NA | 0  | 1 | Not-determined | Genome-fragment | NA | 0     |
| S17_vx_k141_50691  full    | 1413  | No | NA | 0  | 2 | Not-determined | Genome-fragment | NA | 0     |
| S12_vx_k141_141597  full   | 1069  | No | NA | 1  | 0 | Low-quality    | Genome-fragment | NA | 2.36  |
| S17_vx_k141_146356  full   | 2160  | No | NA | 0  | 3 | Not-determined | Genome-fragment | NA | 0     |
| S15_vx_47120  H2gene       | 1069  | No | NA | 0  | 0 | Low-quality    | Genome-fragment | NA | 1.67  |
| S17_vx_k141_146384  full   | 1048  | No | NA | 0  | 1 | Not-determined | Genome-fragment | NA | 0     |
| S17_vx_k141_72599  full    | 2644  | No | NA | 0  | 1 | Not-determined | Genome-fragment | NA | 0     |
| S17_vx_k141_8258  H2gene   | 1070  | No | NA | 2  | 0 | Low-quality    | Genome-fragment | NA | 2.07  |
| S17_vx_k141_86500  full    | 2110  | No | NA | 0  | 2 | Not-determined | Genome-fragment | NA | 0     |
| S17_vx_k141_161388  full   | 1838  | No | NA | 0  | 0 | Not-determined | Genome-fragment | NA | 0     |
| 99_vx_k141_5041  full      | 1070  | No | NA | 0  | 0 | Low-quality    | Genome-fragment | NA | 1.25  |
| S17_vx_k141_63451  full    | 1906  | No | NA | 0  | 1 | Not-determined | Genome-fragment | NA | 0.34  |
| S11_extracted_k141_97615   | 1070  | No | NA | 0  | 1 | Low-quality    | Genome-fragment | NA | 0.29  |
| S13_extracted_5611         | 1070  | No | NA | 0  | 3 | Not-determined | Genome-fragment | NA | 2.06  |
| S17_vx_k141_102301  full   | 5022  | No | NA | 0  | 0 | Low-quality    | Genome-fragment | NA | 0     |
| S14_extracted_k141_54336   | 1070  | No | NA | 0  | 0 | Not-determined | Genome-fragment | NA | 0     |
| S17_vx_k141_102315  full   | 2001  | No | NA | 0  | 1 | Not-determined | Genome-fragment | NA | 0     |
| S17_vx_k141_64350  full    | 1708  | No | NA | 0  | 1 | Not-determined | Genome-fragment | NA | 0     |
| S17_vx_k141_110303  full   | 1796  | No | NA | 0  | 2 | Not-determined | Genome-fragment | NA | 0     |
| S17_vx_k141_131551  full   | 1065  | No | NA | 0  | 0 | Low-quality    | Genome-fragment | NA | 5.61  |
| S14_extracted_k141_83943   | 1070  | No | NA | 0  | 3 | Not-determined | Genome-fragment | NA | 0     |
| S17_vx_k141_138876  full   | 4152  | No | NA | 0  | 0 | Low-quality    | Genome-fragment | NA | 1.8   |
| S14_vx_k141_112058  H2gene | 1070  | No | NA | 1  | 0 | Low-quality    | Genome-fragment | NA | 2.77  |
| S5_vx_k141_84961  full     | 1070  | No | NA | 0  | 1 | Low-quality    | Genome-fragment | NA | 0     |
| S17_vx_k141_161481  full   | 1262  | No | NA | 0  | 0 | Not-determined | Genome-fragment | NA | 0     |
| S7_extracted_61998         | 5499  | No | NA | 0  | 1 | Not-determined | Genome-fragment | NA | 2     |
| S17_vx_k141_131168  full   | 1070  | No | NA | 0  | 0 | Low-quality    | Genome-fragment | NA | 0     |
| S17_vx_k141_168442  full   | 2367  | No | NA | 0  | 1 | Not-determined | Genome-fragment | NA | 0     |
| S17_vx_k141_36622  full    | 7584  | No | NA | 0  | 4 | Not-determined | Genome-fragment | NA | 0     |
| S17_vx_k141_20302  full    | 1213  | No | NA | 0  | 1 | Not-determined | Genome-fragment | NA | 0     |
| S17_vx_k141_154524  full   | 1403  | No | NA | 0  | 0 | Not-determined | Genome-fragment | NA | 0     |
| S17_vx_k141_146564  full   | 2078  | No | NA | 0  | 0 | Not-determined | Genome-fragment | NA | 0     |
| S17_vx_k141_131184  full   | 1235  | No | NA | 0  | 0 | Not-determined | Genome-fragment | NA | 0     |
| S17_vx_k141_64447  full    | 1888  | No | NA | 0  | 3 | Not-determined | Genome-fragment | NA | 0     |
| S7_vx_10608  full          | 3164  | No | NA | 0  | 0 | Low-quality    | Genome-fragment | NA | 1.99  |
| S16_extracted_101339       | 1070  | No | NA | 1  | 0 | Low-quality    | Genome-fragment | NA | 1.77  |
| S17_vx_k141_102370  full   | 1070  | No | NA | 0  | 1 | Not-determined | Genome-fragment | NA | 0     |
| S17_vx_k141_175234  full   | 1139  | No | NA | 0  | 1 | Not-determined | Genome-fragment | NA | 0     |
| S17_vx_k141_20217  full    | 2654  | No | NA | 0  | 1 | Not-determined | Genome-fragment | NA | 0     |
| S16_extracted_104121       | 35455 | No | NA | 11 | 0 | Not-determined | Genome-fragment | NA | 2.53  |
| S17_vx_k141_110426  full   | 1070  | No | NA | 1  | 0 | Low-quality    | Genome-fragment | NA | 0     |
| S17_vx_k141_58025  full    | 1985  | No | NA | 0  | 2 | Not-determined | Genome-fragment | NA | 94.49 |
| S17_vx_k141_102442  full   | 12945 | No | NA | 0  | 0 | High-quality   | High-quality    | NA | 0.67  |
| S16_vx_58242  full         | 1321  | No | NA | 0  | 0 | Not-determined | Genome-fragment | NA | 1.33  |
| S10_extracted_71334        | 1070  | No | NA | 0  | 0 | Low-quality    | Genome-fragment | NA | 0     |
| S17_vx_k141_36188  full    | 1070  | No | NA | 0  | 0 | Low-quality    | Genome-fragment | NA | 0     |
| S17_vx_k141_27588  full    | 1817  | No | NA | 0  | 0 | Not-determined | Genome-fragment | NA | 0     |
| S17_vx_k141_110435  full   | 2801  | No | NA | 0  | 3 | Not-determined | Genome-fragment | NA | 0     |
| S10_extracted_91113        | 1042  | No | NA | 0  | 2 | Not-determined | Genome-fragment | NA | 1.47  |
| S17_vx_k141_64516  full    | 1070  | No | NA | 0  | 1 | Low-quality    | Genome-fragment | NA | 0     |
| S17_vx_k141_161600  full   | 1113  | No | NA | 0  | 1 | Not-determined | Genome-fragment | NA | 0     |
| S17_vx_k141_175302  full   | 1471  | No | NA | 0  | 1 | Not-determined | Genome-fragment | NA | 0     |
| S17_vx_k141_117355  full   | 1342  | No | NA | 0  | 1 | Not-determined | Genome-fragment | NA | 0     |
| S17_vx_k141_64543  full    | 2667  | No | NA | 0  | 0 | Not-determined | Genome-fragment | NA | 0     |
| S10_vx_18861  full         | 9122  | No | NA | 0  | 4 | Not-determined | Genome-fragment | NA | 1.66  |
| S17_vx_k141_6263  full     | 1070  | No | NA | 0  | 0 | Low-quality    | Genome-fragment | NA | 2.49  |
| S12_vx_k141_94784  H2gene  | 5531  | No | NA | 0  | 1 | Not-determined | Genome-fragment | NA | 2.41  |
| S17_vx_k141_64602  full    | 1070  | No | NA | 0  | 2 | Not-determined | Genome-fragment | NA | 0     |
| S17_vx_k141_64611  full    | 1616  | No | NA | 0  | 1 | Not-determined | Genome-fragment | NA | 1.18  |
| S4_extracted_31063         | 1070  | No | NA | 0  | 0 | Low-quality    | Genome-fragment | NA | 0     |
| S17_vx_k141_50896  full    | 2502  | No | NA | 0  | 2 | Not-determined | Genome-fragment | NA | 0     |
| S17_vx_k141_175417  full   | 1183  | No | NA | 0  | 0 | Not-determined | Genome-fragment | NA | 0     |
| S17_vx_k141_154719  full   | 1631  | No | NA | 0  | 2 | Not-determined | Genome-fragment | NA | 0     |
| S17_vx_k141_73874  full    | 1060  | No | NA | 0  | 0 | Not-determined | Genome-fragment | NA | 0     |
| S8_extracted_k141_36618    | 1070  | No | NA | 0  | 1 | Low-quality    | Genome-fragment | NA | 3.42  |
| S17_vx_k141_20493  full    | 1320  | No | NA | 0  | 2 | Not-determined | Genome-fragment | NA | 0.66  |
| S8_vx_k141_17439  full     | 1070  |    |    |    |   |                |                 |    |       |



|                          |        |       |     |    |       |    |                |                 |              |      |      |
|--------------------------|--------|-------|-----|----|-------|----|----------------|-----------------|--------------|------|------|
| S17_vx_k141_73008        | [full] | 1541  | No  | NA | 0     | 1  | Not-determined | Genome-fragment | NA           | 0    | 0    |
| S17_vx_k141_36418        | [full] | 1089  | No  | NA | 0     | 1  | Not-determined | Genome-fragment | NA           | 0    | 0    |
| S15_extracted_76136      | [full] | 1071  | No  | NA | 0     | 1  | Low-quality    | Genome-fragment | NA           | 3.63 | 0    |
| S17_vx_k141_36437        | [full] | 5135  | No  | NA | 0     | 0  | Not-determined | Genome-fragment | NA           | 0    | 0    |
| S17_vx_k141_62546        | [full] | 1072  | No  | NA | 0     | 0  | Low-quality    | Genome-fragment | NA           | 2.5  | 0    |
| S17_vx_k141_58303        | [full] | 1788  | No  | NA | 0     | 0  | Not-determined | Genome-fragment | NA           | 0    | 0    |
| S17_vx_k141_161889       | [full] | 1088  | No  | NA | 0     | 1  | Not-determined | Genome-fragment | NA           | 0    | 0    |
| S17_vx_k141_58306        | [full] | 1324  | No  | NA | 0     | 0  | Not-determined | Genome-fragment | NA           | 0    | 0    |
| S17_vx_k141_124322       | [full] | 1515  | No  | NA | 0     | 1  | Not-determined | Genome-fragment | NA           | 0    | 0    |
| S11_extracted_k141_60911 | [full] | 1072  | No  | NA | 1     | 0  | Low-quality    | Genome-fragment | NA           | 2.26 | 0    |
| S17_vx_k141_58318        | [full] | 2399  | No  | NA | 0     | 2  | Not-determined | Genome-fragment | NA           | 0    | 0    |
| S14_extracted_k141_25949 | [full] | 1072  | No  | NA | 2     | 0  | Low-quality    | Genome-fragment | NA           | 2.52 | 0    |
| S1_vx_k141_43311         | [full] | 1072  | No  | NA | 1     | 0  | Low-quality    | Genome-fragment | NA           | 2.8  | 0    |
| S1_vx_k141_158460        | [full] | 1072  | No  | NA | 0     | 0  | Low-quality    | Genome-fragment | NA           | 2.54 | 0    |
| S3_extracted_k141_112047 | [full] | 1072  | No  | NA | 0     | 0  | Low-quality    | Genome-fragment | NA           | 1.36 | 0    |
| S17_vx_k141_168702       | [full] | 1441  | No  | NA | 0     | 1  | Not-determined | Genome-fragment | NA           | 0    | 0    |
| S17_vx_k141_147095       | [full] | 1533  | No  | NA | 0     | 1  | Not-determined | Genome-fragment | NA           | 0    | 0    |
| S17_vx_k141_110666       | [full] | 70348 | Yes | NA | 66114 | 29 | 4              | High-quality    | High-quality | 100  | 60.2 |
| S17_vx_k141_511721       | [full] | 2156  | No  | NA | 0     | 1  | Not-determined | Genome-fragment | NA           | 0    | 0    |
| S3_extracted_k141_63290  | [full] | 1072  | No  | NA | 0     | 0  | Low-quality    | Genome-fragment | NA           | 0.81 | 0    |
| S3_vx_k141_33429         | [full] | 1072  | No  | NA | 0     | 0  | Low-quality    | Genome-fragment | NA           | 0.77 | 0    |
| S17_vx_k141_43968        | [full] | 1150  | No  | NA | 0     | 1  | Not-determined | Genome-fragment | NA           | 0    | 0    |
| S3_vx_k141_78199         | [full] | 1072  | No  | NA | 1     | 0  | Low-quality    | Genome-fragment | NA           | 2.44 | 0    |
| S17_vx_k141_175574       | [full] | 1460  | No  | NA | 0     | 1  | Not-determined | Genome-fragment | NA           | 0    | 0    |
| S17_vx_k141_94612        | [full] | 2214  | No  | NA | 0     | 0  | Not-determined | Genome-fragment | NA           | 0    | 0    |
| S17_vx_k141_80501        | [full] | 2024  | No  | NA | 0     | 1  | Not-determined | Genome-fragment | NA           | 0    | 0    |
| S3_vx_k141_102351        | [full] | 1072  | No  | NA | 0     | 0  | Low-quality    | Genome-fragment | NA           | 2.44 | 0    |
| S17_vx_k141_175591       | [full] | 2267  | No  | NA | 0     | 1  | Not-determined | Genome-fragment | NA           | 0    | 0    |
| S17_vx_k141_73104        | [full] | 1848  | No  | NA | 0     | 2  | Not-determined | Genome-fragment | NA           | 0    | 0    |
| S17_vx_k141_124387       | [full] | 1432  | No  | NA | 0     | 0  | Not-determined | Genome-fragment | NA           | 0    | 0    |
| S5_extracted_k141_9123   | [full] | 1072  | No  | NA | 1     | 0  | Low-quality    | Genome-fragment | NA           | 2.86 | 0    |
| S17_vx_k141_168769       | [full] | 2432  | No  | NA | 0     | 1  | Not-determined | Genome-fragment | NA           | 0    | 0    |
| S5_extracted_k141_136936 | [full] | 1072  | No  | NA | 0     | 0  | Low-quality    | Genome-fragment | NA           | 2.73 | 0    |
| S5_vx_k141_20889         | [full] | 1072  | No  | NA | 0     | 0  | Low-quality    | Genome-fragment | NA           | 1.3  | 0    |
| S17_vx_k141_24024        | [full] | 1803  | No  | NA | 0     | 1  | Not-determined | Genome-fragment | NA           | 0    | 0    |
| S5_vx_k141_5187          | [full] | 1072  | No  | NA | 0     | 1  | Low-quality    | Genome-fragment | NA           | 2.64 | 0    |
| S17_vx_k141_6635         | [full] | 1330  | No  | NA | 0     | 0  | Not-determined | Genome-fragment | NA           | 0    | 0    |
| S17_vx_k141_147198       | [full] | 3174  | No  | NA | 0     | 3  | Not-determined | Genome-fragment | NA           | 0    | 0    |
| S7_vx_14679              | [full] | 1072  | No  | NA | 0     | 0  | Low-quality    | Genome-fragment | NA           | 2.36 | 0    |
| S17_vx_k141_147203       | [full] | 1722  | No  | NA | 0     | 0  | Not-determined | Genome-fragment | NA           | 0    | 0    |
| S17_vx_k141_73174        | [full] | 2806  | No  | NA | 0     | 2  | Not-determined | Genome-fragment | NA           | 0    | 0    |
| S17_vx_k141_131679       | [full] | 1049  | No  | NA | 0     | 2  | Not-determined | Genome-fragment | NA           | 0    | 0    |
| S17_vx_k141_139339       | [full] | 2499  | No  | NA | 0     | 1  | Not-determined | Genome-fragment | NA           | 0    | 0    |
| S7_vx_73401              | [full] | 1072  | No  | NA | 0     | 0  | Low-quality    | Genome-fragment | NA           | 2.15 | 0    |
| S17_vx_k141_51265        | [full] | 1880  | No  | NA | 0     | 1  | Not-determined | Genome-fragment | NA           | 0    | 0    |
| S17_vx_k141_168824       | [full] | 1848  | No  | NA | 0     | 2  | Not-determined | Genome-fragment | NA           | 0    | 0    |
| S16_extracted_22507      | [full] | 1072  | No  | NA | 0     | 0  | Low-quality    | Genome-fragment | NA           | 0.7  | 0    |
| S17_vx_k141_80606        | [full] | 1026  | No  | NA | 0     | 1  | Not-determined | Genome-fragment | NA           | 0    | 0    |
| S17_vx_k141_51251        | [full] | 7510  | No  | NA | 0     | 7  | Not-determined | Genome-fragment | NA           | 0    | 0    |
| S17_vx_k141_131733       | [full] | 2932  | No  | NA | 0     | 3  | Not-determined | Genome-fragment | NA           | 0    | 0    |
| S17_vx_k141_87206        | [full] | 1915  | No  | NA | 0     | 2  | Not-determined | Genome-fragment | NA           | 0    | 0    |
| S17_vx_k141_6697         | [full] | 2115  | No  | NA | 0     | 2  | Not-determined | Genome-fragment | NA           | 0    | 0    |
| S16_vx_93993             | [full] | 1072  | No  | NA | 0     | 0  | Low-quality    | Genome-fragment | NA           | 3.2  | 0    |
| S17_vx_k141_73257        | [full] | 1007  | No  | NA | 0     | 0  | Not-determined | Genome-fragment | NA           | 0    | 0    |
| S17_vx_k141_80638        | [full] | 2092  | No  | NA | 0     | 2  | Not-determined | Genome-fragment | NA           | 0    | 0    |
| S17_vx_k141_137707       | [full] | 1958  | No  | NA | 0     | 1  | Not-determined | Genome-fragment | NA           | 0    | 0    |
| S17_vx_k141_44076        | [full] | 3167  | No  | NA | 0     | 0  | Not-determined | Genome-fragment | NA           | 0    | 0    |
| S17_vx_k141_51230        | [full] | 1547  | No  | NA | 0     | 0  | Not-determined | Genome-fragment | NA           | 0    | 0    |
| S10_vx_33091             | [full] | 1072  | No  | NA | 0     | 0  | Low-quality    | Genome-fragment | NA           | 2.29 | 0    |
| S12_vx_k141_179594       | [full] | 1072  | No  | NA | 0     | 1  | Low-quality    | Genome-fragment | NA           | 1.82 | 0    |
| S17_vx_k141_139423       | [full] | 1624  | No  | NA | 0     | 0  | Not-determined | Genome-fragment | NA           | 0    | 0    |
| S17_vx_k141_73288        | [full] | 1067  | No  | NA | 0     | 0  | Not-determined | Genome-fragment | NA           | 0    | 0    |
| S15_extracted_58187      | [full] | 1072  | No  | NA | 1     | 0  | Low-quality    | Genome-fragment | NA           | 1.21 | 0    |
| S17_vx_k141_44103        | [full] | 8521  | No  | NA | 0     | 3  | Not-determined | Genome-fragment | NA           | 0    | 0    |
| S6_vx_k141_6681          | [full] | 1072  | No  | NA | 0     | 0  | Low-quality    | Genome-fragment | NA           | 2.05 | 0    |
| S8_vx_k141_8904          | [full] | 1072  | No  | NA | 1     | 0  | Low-quality    | Genome-fragment | NA           | 0.67 | 0    |
| S8_vx_k141_104000        | [full] | 1072  | No  | NA | 0     | 1  | Low-quality    | Genome-fragment | NA           | 0.3  | 0    |
| S17_vx_k141_168898       | [full] | 7403  | No  | NA | 0     | 2  | Not-determined | Genome-fragment | NA           | 0    | 0    |
| S17_vx_k141_13823        | [full] | 1715  | No  | NA | 0     | 2  | Not-determined | Genome-fragment | NA           | 0    | 0    |
| S17_vx_k141_139463       | [full] | 1506  | No  | NA | 0     | 1  | Not-determined | Genome-fragment | NA           | 0    | 0    |
| S17_vx_k141_110805       | [full] | 1880  | No  | NA | 0     | 1  | Not-determined | Genome-fragment | NA           | 0    | 0    |
| S17_vx_k141_73330        | [full] | 3548  | No  | NA | 0     | 1  | Not-determined | Genome-fragment | NA           | 0    | 0    |
| S17_vx_k141_20768        | [full] | 2161  | No  | NA | 0     | 1  | Not-determined | Genome-fragment | NA           | 0    | 0    |
| S7_extracted_k141_138867 | [full] | 1073  | No  | NA | 0     | 1  | Low-quality    | Genome-fragment | NA           | 0.4  | 0    |
| S17_vx_k141_64236        | [full] | 1073  | No  | NA | 0     | 0  | Low-quality    | Genome-fragment | NA           | 2.6  | 0    |
| S9_extracted_k141_49587  | [full] | 1073  | No  | NA | 1     | 0  | Low-quality    | Genome-fragment | NA           | 2.91 | 0    |
| S17_vx_k141_64684        | [full] | 1741  | No  | NA | 0     | 0  | Not-determined | Genome-fragment | NA           | 0    | 0    |
| S9_vx_k141_2677          | [full] | 1073  | No  | NA | 1     | 0  | Low-quality    | Genome-fragment | NA           | 1.57 | 0    |
| S13_vx_15211             | [full] | 1073  | No  | NA | 2     | 0  | Low-quality    | Genome-fragment | NA           | 1.56 | 0    |
| S17_vx_k141_117802       | [full] | 2878  | No  | NA | 0     | 1  | Not-determined | Genome-fragment | NA           | 0    | 0    |
| S17_vx_k141_169010       | [full] | 1509  | No  | NA | 0     | 1  | Not-determined | Genome-fragment | NA           | 0    | 0    |
| S17_vx_k141_117830       | [full] | 3089  | No  | NA | 0     | 1  | Not-determined | Genome-fragment | NA           | 0    | 0    |
| S17_vx_k141_131917       | [full] | 1628  | No  | NA | 0     | 2  | Not-determined | Genome-fragment | NA           | 0    | 0    |
| S14_vx_k141_62476        | [full] | 1073  | No  | NA | 0     | 0  | Low-quality    | Genome-fragment | NA           | 2.75 | 0    |
| S17_vx_k141_80727        | [full] | 1386  | No  | NA | 0     | 1  | Not-determined | Genome-fragment | NA           | 0    | 0    |
| S17_vx_k141_51471        | [full] | 1623  | No  | NA | 0     | 1  | Not-determined | Genome-fragment | NA           | 0    | 0    |
| S17_vx_k141_103150       | [full] | 4415  | No  | NA | 0     | 1  | Not-determined | Genome-fragment | NA           | 0    | 0    |
| S1_vx_k141_1580          | [full] | 1073  | No  | NA | 0     | 1  | Low-quality    | Genome-fragment | NA           | 0.45 | 0    |
| S17_vx_k141_117861       | [full] | 1685  | No  | NA | 0     | 2  | Not-determined | Genome-fragment | NA           | 0    | 0    |
| S17_vx_k141_131974       | [full] | 1371  | No  | NA | 0     | 2  | Not-determined | Genome-fragment | NA           | 0    | 0    |
| S1_vx_k141_16026         | [full] | 1073  | No  | NA | 0     | 0  | Low-quality    | Genome-fragment | NA           | 2.13 | 0    |
| S3_extracted_k141_9020   | [full] | 1073  | No  | NA | 0     | 0  | Low-quality    | Genome-fragment | NA           | 0.92 | 0    |
| S3_vx_k141_101249        | [full] | 1073  | No  | NA | 0     | 0  | Low-quality    | Genome-fragment | NA           | 2.69 | 0    |
| S5_extracted_k141_47797  | [full] | 1073  | No  | NA | 2     | 0  | Low-quality    | Genome-fragment | NA           | 1.67 | 0    |
| S5_vx_k141_17854         | [full] | 1073  | No  | NA | 1     | 0  | Low-quality    | Genome-fragment | NA           | 2.94 | 0    |
| S17_vx_k141_169079       | [full] | 1043  | No  | NA | 0     | 1  | Not-determined | Genome-fragment | NA           | 0    | 0    |
| S17_vx_k141_117885       | [full] | 4158  | No  | NA | 0     | 3  | Not-determined | Genome-fragment | NA           | 0    | 0    |
| S17_vx_k141_13929        | [full] | 2290  | No  | NA | 0     | 0  | Not-determined | Genome-fragment | NA           | 0    | 0    |
| S17_vx_k141_131040       | [full] | 2229  | No  | NA | 0     | 2  | Not-determined | Genome-fragment | NA           | 0    | 0    |
| S17_vx_k141_13953        | [full] | 2247  | No  | NA | 0     | 2  | Not-determined | Genome-fragment | NA           | 0    | 0    |
| S17_vx_k141_94924        | [full] | 1608  | No  | NA | 0     | 1  | Not-determined | Genome-fragment | NA           | 0    | 0    |
| S17_vx_k141_162395       | [full] | 1272  | No  | NA | 0     | 1  | Not-determined | Genome-fragment | NA           | 0    | 0    |
| S17_vx_k141_162310       | [full] | 2392  | No  | NA | 0     | 2  | Not-determined | Genome-fragment | NA           | 0    | 0    |
| S17_vx_k141_28327        | [full] | 3221  | No  | NA | 0     | 1  | Not-determined | Genome-fragment | NA           | 0    | 0    |
| S5_vx_k141_9797          | [full] | 1073  | No  | NA | 0     | 0  | Low-quality    | Genome-fragment | NA           | 1.65 | 0    |
| S17_vx_k141_162319       | [full] | 1554  | No  | NA | 0     | 2  | Not-determined | Genome-fragment | NA           | 0    | 0    |
| S7_extracted_15893       | [full] | 1073  | No  | NA | 0     | 0  | Low-quality    | Genome-fragment | NA           | 1.34 | 0    |
| S17_vx_k141_87548        | [full] | 14884 | No  | NA | 0     | 2  | Not-determined | Genome-fragment | NA           | 0    | 0    |
| S17_vx_k141_103311       | [full] | 1314  | No  | NA | 0     | 1  | Not-determined | Genome-fragment | NA           | 0    | 0    |
| S17_vx_k141_73585        | [full] | 7545  | No  | NA | 0     | 3  | Not-determined | Genome-fragment | NA           | 0    | 0    |
| S7_extracted_63375       | [full] | 1073  | No  | NA | 1     | 0  | Low-quality    | Genome-fragment | NA           | 1.61 | 0    |
| S17_vx_k141_64634        | [full] | 2313  | No  | NA | 0     | 1  | Not-determined | Genome-fragment | NA           | 0    | 0    |
| S17_vx_k141_176033       | [full] | 2894  | No  | NA | 0     | 1  | Not-determined | Genome-fragment | NA           | 0    | 0    |
| S17_vx_k141_6999         | [full] | 1106  | No  | NA | 0     | 2  | Not-determined | Genome-fragment | NA           | 0.36 | 0    |
| S7_extracted_11821       | [full] | 1073  | No  | NA | 0     | 1  | Low-quality    | Genome-fragment | NA           | 0    | 0    |
| S17_vx_k141_7008         | [full] | 1644  | No  | NA | 0     | 2  | Not-determined | Genome-fragment | NA           | 0    | 0    |
| S16_extracted_155746     | [full] | 1073  | No  | NA | 0     | 0  | Low-quality    | Genome-fragment | NA           | 1.73 | 0    |
| S17_vx_k141_117991       | [full] | 15700 | No  | NA | 0     | 7  | Not-determined | Genome-fragment | NA           | 0    | 0    |
| S16_vx_138867            | [full] | 1073  | No  | NA | 0     | 0  | Low-quality    | Genome-fragment | NA           | 1.57 | 0    |
| S12_vx_k141_70947        | [full] | 1073  | No  | NA | 0     | 1  | Low-quality    | Genome-fragment | NA           | 0.24 | 0    |
| S17_vx_k141_139660       | [full] | 1319  | No  | NA | 0     | 1  | Not-determined | Genome-fragment | NA           | 0    | 0    |
| S17_vx_k141_169230       | [full] | 2441  | No  | NA | 0     | 1  | Not-determined | Genome-fragment | NA           | 0    | 0    |
| S17_vx_k141_124738       | [full] | 1058  | No  | NA | 0     | 0  | Not-determined | Genome-fragment | NA           | 0    | 0    |
| S6_vx_k141_1511          | [full] | 1073  | No  | NA | 0     | 0  | Low-quality    | Genome-fragment | NA           | 2.63 | 0    |
| S17_vx_k141_21121        | [full] | 2178  | No  | NA | 0     | 1  | Not-determined | Genome-fragment | NA           | 0    | 0    |
| S8_extracted_k141_31700  | [full] | 1073  | No  | NA | 0     | 2  | Low-quality    | Genome-fragment | NA           | 0.56 | 0    |
| S17_vx_k141_36792        | [full] | 3641  | No  | NA | 0     | 4  | Not-determined | Genome-fragment | NA           |      |      |



|                           |             |       |    |    |   |   |                |                 |       |   |
|---------------------------|-------------|-------|----|----|---|---|----------------|-----------------|-------|---|
| S16_vs_5071               | [full]      | 1075  | No | NA | 0 | 0 | Low-quality    | Genome-fragment | 0.66  | 0 |
| S17_vs_k141_1871          | No          | 1871  | No | NA | 2 | 2 | Not-determined | Genome-fragment | NA    | 0 |
| S17_vs_k141_58946         | [full]      | 6748  | No | NA | 0 | 0 | Not-determined | Genome-fragment | NA    | 0 |
| S17_vs_k141_14365         | [full]      | 2194  | No | NA | 0 | 0 | Not-determined | Genome-fragment | NA    | 0 |
| S10_vs_29910              | [full]      | 1075  | No | NA | 1 | 0 | Low-quality    | Genome-fragment | 0.95  | 0 |
| S17_vs_k141_7860          | [full]      | 6605  | No | NA | 0 | 4 | Not-determined | Genome-fragment | NA    | 0 |
| S17_vs_k141_14373         | [full]      | 2105  | No | NA | 0 | 3 | Not-determined | Genome-fragment | NA    | 0 |
| S17_vs_k141_21652         | [full]      | 2817  | No | NA | 0 | 2 | Not-determined | Genome-fragment | NA    | 0 |
| S17_vs_k141_14405         | [full]      | 1414  | No | NA | 0 | 0 | Not-determined | Genome-fragment | NA    | 0 |
| S17_vs_k141_58999         | [full]      | 3428  | No | NA | 0 | 3 | Not-determined | Genome-fragment | NA    | 0 |
| S12_extracted_k141_114046 |             | 1075  | No | NA | 1 | 0 | Low-quality    | Genome-fragment | 0.92  | 0 |
| S17_vs_k141_169786        | [full]      | 1560  | No | NA | 0 | 0 | Not-determined | Genome-fragment | NA    | 0 |
| S17_vs_k141_59022         | [full]      | 2525  | No | NA | 0 | 0 | Not-determined | Genome-fragment | NA    | 0 |
| S12_vs_k141_29223         | [full]      | 1075  | No | NA | 0 | 0 | Low-quality    | Genome-fragment | 2.62  | 0 |
| S17_vs_k141_28919         | [full]      | 2779  | No | NA | 0 | 2 | Not-determined | Genome-fragment | NA    | 0 |
| S12_vs_k141_85119         | [full]      | 1075  | No | NA | 0 | 1 | Low-quality    | Genome-fragment | 2.58  | 0 |
| S17_vs_k141_95372         | [full]      | 3364  | No | NA | 0 | 2 | Not-determined | Genome-fragment | NA    | 0 |
| S8_extracted_k141_176416  |             | 1075  | No | NA | 0 | 1 | Low-quality    | Genome-fragment | 0.58  | 0 |
| S17_vs_k141_14510         | [full]      | 2052  | No | NA | 0 | 1 | Not-determined | Genome-fragment | NA    | 0 |
| S17_vs_k141_169875        | [full]      | 1757  | No | NA | 0 | 3 | Not-determined | Genome-fragment | NA    | 0 |
| S17_vs_k141_81255         | [full]      | 1693  | No | NA | 0 | 1 | Not-determined | Genome-fragment | NA    | 0 |
| S17_vs_k141_65485         | [full]      | 20873 | No | NA | 0 | 2 | Not-determined | Genome-fragment | NA    | 0 |
| S17_vs_k141_65502         | [full]      | 1067  | No | NA | 0 | 0 | Not-determined | Genome-fragment | NA    | 0 |
| S17_vs_k141_169921        | [full]      | 2614  | No | NA | 0 | 1 | Not-determined | Genome-fragment | NA    | 0 |
| S17_vs_k141_88218         | [full]      | 1047  | No | NA | 0 | 1 | Not-determined | Genome-fragment | NA    | 0 |
| S17_vs_k141_145691        | [full]      | 2864  | No | NA | 0 | 1 | Not-determined | Genome-fragment | NA    | 0 |
| S11_vs_k141_13482         | [full]      | 1076  | No | NA | 0 | 1 | Low-quality    | Genome-fragment | 0.36  | 0 |
| S17_vs_k141_21790         | [full]      | 4254  | No | NA | 0 | 2 | Not-determined | Genome-fragment | NA    | 0 |
| S13_extracted_91984       |             | 1076  | No | NA | 0 | 2 | Low-quality    | Genome-fragment | 2.4   | 0 |
| S13_vs_96206              | [full]      | 1076  | No | NA | 0 | 0 | Low-quality    | Genome-fragment | 3.38  | 0 |
| S1_extracted_k141_131374  |             | 1076  | No | NA | 1 | 0 | Low-quality    | Genome-fragment | 0.7   | 0 |
| S17_vs_k141_125312        | [full]      | 1275  | No | NA | 0 | 0 | Not-determined | Genome-fragment | NA    | 0 |
| S3_vs_k141_21642          | [full]      | 1076  | No | NA | 1 | 0 | Low-quality    | Genome-fragment | 3.13  | 0 |
| S17_vs_k141_176686        | [full]      | 1672  | No | NA | 0 | 0 | Not-determined | Genome-fragment | NA    | 0 |
| S5_extracted_k141_454881  |             | 1076  | No | NA | 1 | 0 | Low-quality    | Genome-fragment | 3.13  | 0 |
| S17_vs_k141_131895        | [full]      | 1282  | No | NA | 0 | 1 | Not-determined | Genome-fragment | NA    | 0 |
| S7_extracted_15476        |             | 1076  | No | NA | 0 | 0 | Low-quality    | Genome-fragment | 0.91  | 0 |
| S17_vs_k141_125458        | [full]      | 5928  | No | NA | 0 | 5 | Not-determined | Genome-fragment | NA    | 0 |
| S17_vs_k141_65746         | [full]      | 1409  | No | NA | 3 | 3 | Not-determined | Genome-fragment | NA    | 0 |
| S7_extracted_34758        |             | 1076  | No | NA | 1 | 0 | Low-quality    | Genome-fragment | 0.82  | 0 |
| S17_vs_k141_125556        | [full]      | 1602  | No | NA | 0 | 2 | Not-determined | Genome-fragment | NA    | 0 |
| S17_vs_k141_21993         | [full]      | 5187  | No | NA | 1 | 1 | Not-determined | Genome-fragment | NA    | 0 |
| S7_vs_105065              | [full]      | 1076  | No | NA | 1 | 0 | Low-quality    | Genome-fragment | 3.13  | 0 |
| S17_vs_k141_65882         | [full]      | 1940  | No | NA | 0 | 2 | Not-determined | Genome-fragment | NA    | 0 |
| S17_vs_k141_88522         | [full]      | 1850  | No | NA | 0 | 1 | Not-determined | Genome-fragment | NA    | 0 |
| S12_extracted_k141_63888  |             | 1076  | No | NA | 0 | 0 | Low-quality    | Genome-fragment | 0.8   | 0 |
| S17_vs_k141_195855        | [full]      | 1922  | No | NA | 0 | 1 | Not-determined | Genome-fragment | NA    | 0 |
| S12_extracted_k141_125692 |             | 1076  | No | NA | 0 | 1 | Low-quality    | Genome-fragment | 0.33  | 0 |
| S17_vs_k141_55866         | [full]      | 3044  | No | NA | 0 | 1 | Not-determined | Genome-fragment | NA    | 0 |
| S12_vs_k141_51695         | [full]      | 1076  | No | NA | 0 | 0 | Low-quality    | Genome-fragment | 2.4   | 0 |
| S12_vs_k141_119048        | [full]      | 1076  | No | NA | 1 | 0 | Low-quality    | Genome-fragment | 2.15  | 0 |
| S15_vs_12954              | [full]      | 1076  | No | NA | 0 | 0 | Low-quality    | Genome-fragment | 2.82  | 0 |
| S17_vs_k141_88632         | [full]      | 2378  | No | NA | 0 | 3 | Not-determined | Genome-fragment | NA    | 0 |
| S17_vs_k141_22071         | [full]      | 1077  | No | NA | 0 | 1 | Not-determined | Genome-fragment | NA    | 0 |
| S8_extracted_k141_3812    |             | 1076  | No | NA | 0 | 0 | Low-quality    | Genome-fragment | 2.34  | 0 |
| S8_extracted_k141_151538  |             | 1076  | No | NA | 0 | 0 | Low-quality    | Genome-fragment | 3.87  | 0 |
| S8_extracted_k141_169697  |             | 1076  | No | NA | 0 | 0 | Low-quality    | Genome-fragment | 1.64  | 0 |
| S17_vs_k141_95960         | [full]      | 10489 | No | NA | 0 | 0 | Not-determined | Genome-fragment | NA    | 0 |
| S17_vs_k141_170180        | [full]      | 1077  | No | NA | 0 | 0 | Low-quality    | Genome-fragment | 2.57  | 0 |
| S17_vs_k141_177118        | [full]      | 2563  | No | NA | 0 | 2 | Not-determined | Genome-fragment | NA    | 0 |
| S9_extracted_k141_67479   |             | 1077  | No | NA | 0 | 0 | Low-quality    | Genome-fragment | 2.6   | 0 |
| S17_vs_k141_177134        | [full]      | 2939  | No | NA | 2 | 2 | Not-determined | Genome-fragment | NA    | 0 |
| S9_extracted_k141_52138   |             | 1077  | No | NA | 0 | 1 | Low-quality    | Genome-fragment | 1.97  | 0 |
| S14_vs_k141_45479         | [full]      | 1077  | No | NA | 0 | 0 | Low-quality    | Genome-fragment | 6.12  | 0 |
| S17_vs_k141_66121         | [full]      | 1567  | No | NA | 0 | 0 | Not-determined | Genome-fragment | NA    | 0 |
| S17_vs_k141_66296         | [full]      | 2012  | No | NA | 0 | 0 | Not-determined | Genome-fragment | NA    | 0 |
| S17_vs_k141_66330         | [full]      | 3080  | No | NA | 0 | 2 | Not-determined | Genome-fragment | NA    | 0 |
| S17_vs_k141_66388         | [full]      | 5961  | No | NA | 0 | 2 | Not-determined | Genome-fragment | NA    | 0 |
| S17_vs_k141_147886        | [O_partial] | 13305 | No | NA | 0 | 1 | Not-determined | Genome-fragment | NA    | 0 |
| S17_vs_k141_141233        | [O_partial] | 15752 | No | NA | 0 | 3 | Not-determined | Genome-fragment | NA    | 0 |
| S17_vs_k141_45389         | [O_partial] | 12382 | No | NA | 0 | 7 | Not-determined | Genome-fragment | NA    | 0 |
| S17_vs_k141_3690          | [O_partial] | 17288 | No | NA | 1 | 1 | High-quality   | Genome-fragment | 92.42 | 0 |
| S17_vs_k141_82185         | [O_partial] | 12363 | No | NA | 0 | 6 | Not-determined | Genome-fragment | NA    | 0 |
| S14_vs_k141_57566         | [full]      | 1077  | No | NA | 0 | 0 | Low-quality    | Genome-fragment | 2.56  | 0 |
| S1_extracted_k141_138855  |             | 1077  | No | NA | 0 | 0 | Low-quality    | Genome-fragment | 0.81  | 0 |
| S17_vs_k141_91924         | [O_partial] | 11124 | No | NA | 0 | 2 | Not-determined | Genome-fragment | NA    | 0 |
| S17_vs_k141_11405         | [O_partial] | 17913 | No | NA | 0 | 7 | Not-determined | Genome-fragment | NA    | 0 |
| S17_vs_k141_62552         | [O_partial] | 2111  | No | NA | 0 | 0 | Not-determined | Genome-fragment | NA    | 0 |
| S3_vs_k141_56475          | [full]      | 1077  | No | NA | 0 | 0 | Low-quality    | Genome-fragment | 2.16  | 0 |
| S17_vs_k141_139583        | [O_partial] | 11782 | No | NA | 0 | 4 | Not-determined | Genome-fragment | NA    | 0 |
| S3_vs_k141_123845         | [full]      | 1077  | No | NA | 2 | 0 | Low-quality    | Genome-fragment | 1.68  | 0 |
| S17_vs_k141_88624         | [full]      | 1808  | No | NA | 0 | 0 | Not-determined | Genome-fragment | NA    | 0 |
| S5_vs_k141_134347         | [full]      | 1077  | No | NA | 0 | 0 | Low-quality    | Genome-fragment | 2.72  | 0 |
| S5_vs_k141_118137         | [full]      | 1077  | No | NA | 0 | 0 | Low-quality    | Genome-fragment | 2.15  | 0 |
| S17_vs_k141_81505         | [full]      | 1180  | No | NA | 0 | 0 | Not-determined | Genome-fragment | NA    | 0 |
| S7_extracted_34772        |             | 1077  | No | NA | 0 | 0 | Low-quality    | Genome-fragment | 2.44  | 0 |
| S17_vs_k141_155556        | [full]      | 1068  | No | NA | 0 | 0 | Not-determined | Genome-fragment | NA    | 0 |
| S12_vs_k141_152342        | [full]      | 1077  | No | NA | 1 | 0 | Low-quality    | Genome-fragment | 2.33  | 0 |
| S17_vs_k141_131581        | [full]      | 1338  | No | NA | 0 | 2 | Not-determined | Genome-fragment | NA    | 0 |
| S12_vs_k141_47872         | [full]      | 1077  | No | NA | 0 | 0 | Low-quality    | Genome-fragment | 2.56  | 0 |
| S15_extracted_28290       |             | 1077  | No | NA | 0 | 0 | Low-quality    | Genome-fragment | 2.5   | 0 |
| S8_extracted_k141_151348  |             | 1077  | No | NA | 0 | 0 | Low-quality    | Genome-fragment | 2.6   | 0 |
| S17_vs_k141_45087         | [full]      | 1325  | No | NA | 0 | 0 | Not-determined | Genome-fragment | NA    | 0 |
| S8_vs_k141_130323         | [full]      | 1077  | No | NA | 0 | 0 | Low-quality    | Genome-fragment | 1.13  | 0 |
| S8_vs_k141_48748          | [full]      | 1077  | No | NA | 0 | 0 | Low-quality    | Genome-fragment | 2.62  | 0 |
| S17_vs_k141_141291        | [full]      | 1622  | No | NA | 0 | 0 | Not-determined | Genome-fragment | NA    | 0 |
| S17_vs_k141_96898         | [full]      | 2521  | No | NA | 0 | 0 | Not-determined | Genome-fragment | NA    | 0 |
| S17_vs_k141_89542         | [full]      | 1435  | No | NA | 0 | 0 | Not-determined | Genome-fragment | NA    | 0 |
| S17_vs_k141_119364        | [full]      | 1558  | No | NA | 0 | 0 | Not-determined | Genome-fragment | NA    | 0 |
| S7_extracted_k141_10740   |             | 1078  | No | NA | 0 | 0 | Low-quality    | Genome-fragment | 1.07  | 0 |
| S17_vs_k141_23394         | [full]      | 1702  | No | NA | 0 | 0 | Not-determined | Genome-fragment | NA    | 0 |
| S5_vs_k141_25616          | [full]      | 1078  | No | NA | 0 | 0 | Low-quality    | Genome-fragment | 1.67  | 0 |
| S17_vs_k141_157074        | [full]      | 1475  | No | NA | 0 | 0 | Not-determined | Genome-fragment | NA    | 0 |
| S11_extracted_k141_47459  |             | 1078  | No | NA | 1 | 0 | Low-quality    | Genome-fragment | 2.43  | 0 |
| S3_extracted_k141_24052   |             | 1078  | No | NA | 1 | 1 | Low-quality    | Genome-fragment | 0.31  | 0 |
| S3_vs_k141_102208         | [full]      | 1078  | No | NA | 0 | 0 | Low-quality    | Genome-fragment | 1.58  | 0 |
| S17_vs_k141_134997        | [full]      | 1221  | No | NA | 0 | 0 | Not-determined | Genome-fragment | NA    | 0 |
| S5_extracted_k141_51723   |             | 1078  | No | NA | 0 | 0 | Low-quality    | Genome-fragment | 2.39  | 0 |
| S5_extracted_k141_107656  |             | 1078  | No | NA | 0 | 0 | Low-quality    | Genome-fragment | 1.84  | 0 |
| S5_vs_k141_134055         | [full]      | 1078  | No | NA | 0 | 0 | Low-quality    | Genome-fragment | 0.63  | 0 |
| S5_vs_k141_107266         | [full]      | 1078  | No | NA | 2 | 0 | Low-quality    | Genome-fragment | 1.48  | 0 |
| S7_vs_71434               | [full]      | 1078  | No | NA | 0 | 0 | Low-quality    | Genome-fragment | 1.94  | 0 |
| S16_vs_102575             | [full]      | 1078  | No | NA | 0 | 1 | Low-quality    | Genome-fragment | 0.77  | 0 |
| S10_vs_26620              | [full]      | 1078  | No | NA | 0 | 0 | Low-quality    | Genome-fragment | 2.62  | 0 |
| S12_vs_k141_140503        | [full]      | 1078  | No | NA | 0 | 0 | Low-quality    | Genome-fragment | 1.53  | 0 |
| S17_vs_k141_54925         | [full]      | 1471  | No | NA | 0 | 1 | Not-determined | Genome-fragment | NA    | 0 |
| S6_vs_k141_27339          | [full]      | 1078  | No | NA | 1 | 0 | Low-quality    | Genome-fragment | 2.39  | 0 |
| S6_vs_k141_24549          | [full]      | 1078  | No | NA | 1 | 0 | Low-quality    | Genome-fragment | 2.69  | 0 |
| S8_extracted_k141_23517   |             | 1078  | No | NA | 0 | 0 | Low-quality    | Genome-fragment | 0.68  | 0 |
| S8_vs_k141_202906         | [full]      | 1078  | No | NA | 0 | 2 | Low-quality    | Genome-fragment | 0.28  | 0 |
| S8_vs_k141_143483         | [full]      | 1078  | No | NA | 0 | 1 | Low-quality    | Genome-fragment | 1.97  | 0 |
| S17_vs_k141_33057         | [full]      | 1078  | No | NA | 0 | 0 | Not-determined | Genome-fragment | NA    | 0 |
| S17_extracted_k141_104258 |             | 1079  | No | NA | 3 | 0 | Low-quality    | Genome-fragment | 3.56  | 0 |
| S17_vs_k141_176443        | [full]      | 1079  | No | NA | 2 | 0 | Low-quality    | Genome-fragment | 1.77  | 0 |
| S1_vs_k141_140546         | [full]      | 1079  | No | NA | 0 | 0 | Low-quality    | Genome-fragment | 0.75  | 0 |
| S5_vs_k141_102881         | [full]      | 1079  | No | NA | 0 | 0 | Low-quality    | Genome-fragment | 2.62  | 0 |
| S17_vs_k141_128746        | [full]      | 2097  | No | NA | 0 | 0 | Not-determined | Genome-fragment | NA    | 0 |
| S7_extracted_76500        |             | 1079  | No | NA | 0 | 0 | Low-quality    | Genome-fragment | 2.98  | 0 |
| S17_vs_k141_62516         | [full]      | 1161  | No | NA | 0 | 0 | Not-determined | Genome-fragment | NA    | 0 |
| S7_extracted_127658       |             | 1079  | No | NA | 0 | 0 | Low-quality    | Genome-fragment | 1.75  | 0 |
| S7_vs_61050               | [full]      | 1079  | No | NA | 0 | 0 | Low-quality    | Genome-fragment | 2.86  | 0 |
| S16_vs_138965             | [full]      | 1079  | No | NA | 2 | 0 | Low-quality    | Genome-fragment | 1.32  | 0 |
| S17_vs_k141_77956         | [full]      | 1295  | No | NA | 0 | 0 | Not-determined | Genome-fragment | NA    | 0 |
| S10_extracted_17814       |             | 1079  | No | NA | 0 | 1 | Low-quality    | Genome-fragment | 2.53  | 0 |
| S10_extracted_61604       |             | 1079  | No | NA | 1 | 0 | Low-quality    | Genome-fragment | 3.85  | 0 |
| S10_vs_53249              | [full]      | 1079  | No | NA | 0 | 0 | Low-quality    | Genome-fragment | 2.39  | 0 |
| S12_vs_k141_159175        | [full]      | 1079  | No | NA | 0 | 1 | Low-quality</  |                 |       |   |



|     |                       |       |     |     |    |    |                |                 |       |       |
|-----|-----------------------|-------|-----|-----|----|----|----------------|-----------------|-------|-------|
| 57  | extracted_93724       | 1081  | No  | NA  | 0  | 0  | Low-quality    | Genome-fragment | 0.96  | 0     |
| 59  | extracted_k141_11404  | 1253  | No  | NA  | 0  | 0  | Not-determined | Genome-fragment | NA    | 0     |
| 59  | extracted_k141_83380  | 4599  | No  | NA  | 0  | 0  | Not-determined | Genome-fragment | NA    | 0     |
| 57  | vs_91304  full        | 1081  | No  | NA  | 2  | 0  | Low-quality    | Genome-fragment | 2.25  | 0     |
| 512 | vs_k141_43679  full   | 1081  | No  | NA  | 0  | 0  | Low-quality    | Genome-fragment | 1.57  | 0     |
| 59  | extracted_k141_34148  | 1119  | No  | NA  | 0  | 0  | Not-determined | Genome-fragment | NA    | 0     |
| 512 | vs_k141_37254  full   | 1081  | No  | NA  | 0  | 0  | Low-quality    | Genome-fragment | 0.61  | 0     |
| 59  | extracted_k141_75808  | 1444  | No  | NA  | 0  | 1  | Not-determined | Genome-fragment | NA    | 0     |
| 59  | extracted_k141_34159  | 1607  | No  | NA  | 0  | 0  | Not-determined | Genome-fragment | NA    | 0     |
| 58  | extracted_k141_29239  | 1081  | No  | NA  | 0  | 1  | Low-quality    | Genome-fragment | 0.27  | 0     |
| 59  | extracted_k141_87322  | 1512  | No  | NA  | 0  | 1  | Not-determined | Genome-fragment | NA    | 0     |
| 58  | extracted_k141_117447 | 1081  | No  | NA  | 0  | 1  | Low-quality    | Genome-fragment | 2.02  | 0     |
| 58  | vs_k141_4137  full    | 1081  | No  | NA  | 0  | 0  | Low-quality    | Genome-fragment | 2.54  | 0     |
| 59  | extracted_k141_22831  | 1266  | No  | NA  | 0  | 0  | Not-determined | Genome-fragment | NA    | 0     |
| 59  | extracted_k141_37942  | 7031  | No  | NA  | 0  | 13 | Not-determined | Genome-fragment | NA    | 0     |
| 517 | extracted_k141_147931 | 1082  | No  | NA  | 0  | 1  | Low-quality    | Genome-fragment | 1.86  | 0     |
| 59  | extracted_k141_37951  | 1447  | No  | NA  | 0  | 0  | Not-determined | Genome-fragment | NA    | 0     |
| 59  | extracted_k141_75883  | 1008  | No  | NA  | 0  | 1  | Not-determined | Genome-fragment | NA    | 0     |
| 59  | extracted_k141_59471  | 1454  | No  | NA  | 0  | 0  | Not-determined | Genome-fragment | NA    | 0     |
| 59  | extracted_k141_53150  | 1751  | No  | NA  | 0  | 1  | Not-determined | Genome-fragment | NA    | 0     |
| 59  | extracted_k141_53172  | 1119  | No  | NA  | 0  | 0  | Not-determined | Genome-fragment | NA    | 0     |
| 517 | extracted_k141_4694   | 1082  | No  | NA  | 0  | 0  | Low-quality    | Genome-fragment | 2.11  | 0     |
| 517 | vs_k141_4142  full    | 1082  | No  | NA  | 0  | 0  | Low-quality    | Genome-fragment | 0.75  | 0     |
| 59  | extracted_k141_75905  | 1120  | No  | NA  | 0  | 3  | Not-determined | Genome-fragment | NA    | 0     |
| 59  | extracted_k141_75906  | 1872  | No  | NA  | 0  | 0  | Not-determined | Genome-fragment | NA    | 0     |
| 59  | extracted_k141_22903  | 1856  | No  | NA  | 0  | 2  | Not-determined | Genome-fragment | NA    | 0     |
| 59  | extracted_k141_83536  | 1607  | No  | NA  | 0  | 0  | Not-determined | Genome-fragment | NA    | 0     |
| 514 | extracted_k141_58947  | 1082  | No  | NA  | 3  | 0  | Low-quality    | Genome-fragment | 3.33  | 0     |
| 514 | extracted_k141_73534  | 1082  | No  | NA  | 0  | 0  | Low-quality    | Genome-fragment | 0.68  | 0     |
| 514 | vs_k141_125924  full  | 1082  | No  | NA  | 0  | 2  | Low-quality    | Genome-fragment | 0.43  | 0     |
| 53  | vs_k141_77715  full   | 1082  | No  | NA  | 1  | 0  | Low-quality    | Genome-fragment | 2.85  | 0     |
| 55  | extracted_k141_49161  | 1082  | No  | NA  | 0  | 0  | Low-quality    | Genome-fragment | 1.92  | 0     |
| 59  | extracted_k141_79752  | 4531  | No  | NA  | 0  | 1  | Not-determined | Genome-fragment | NA    | 0     |
| 59  | extracted_k141_45612  | 1161  | No  | NA  | 0  | 1  | Not-determined | Genome-fragment | NA    | 0     |
| 59  | extracted_k141_34362  | 1050  | No  | NA  | 0  | 1  | Not-determined | Genome-fragment | NA    | 0     |
| 59  | extracted_k141_19155  | 2404  | No  | NA  | 0  | 1  | Not-determined | Genome-fragment | NA    | 0     |
| 55  | vs_k141_84736  full   | 1082  | No  | NA  | 0  | 2  | Low-quality    | Genome-fragment | 1.23  | 0     |
| 57  | extracted_113858      | 1082  | No  | NA  | 0  | 1  | Low-quality    | Genome-fragment | 1.66  | 0     |
| 59  | extracted_k141_7714   | 1769  | No  | NA  | 0  | 1  | Not-determined | Genome-fragment | NA    | 0     |
| 59  | extracted_k141_34421  | 1339  | No  | NA  | 0  | 2  | Not-determined | Genome-fragment | NA    | 0     |
| 59  | extracted_k141_64618  | 1987  | No  | NA  | 0  | 2  | Not-determined | Genome-fragment | NA    | 0     |
| 59  | extracted_k141_11648  | 4594  | No  | NA  | 0  | 2  | Not-determined | Genome-fragment | NA    | 0     |
| 59  | extracted_k141_68384  | 3758  | No  | NA  | 0  | 0  | Not-determined | Genome-fragment | NA    | 0     |
| 516 | extracted_10876       | 1082  | No  | NA  | 0  | 1  | Low-quality    | Genome-fragment | 1.87  | 0     |
| 59  | extracted_k141_64631  | 1008  | No  | NA  | 0  | 2  | Not-determined | Genome-fragment | NA    | 0     |
| 59  | extracted_k141_53360  | 1042  | No  | NA  | 0  | 0  | Not-determined | Genome-fragment | NA    | 0     |
| 59  | extracted_k141_49425  | 1162  | No  | NA  | 0  | 1  | Not-determined | Genome-fragment | NA    | 0     |
| 516 | vs_11113  full        | 1082  | No  | NA  | 1  | 0  | Low-quality    | Genome-fragment | 3.34  | 0     |
| 510 | vs_20268  full        | 1082  | No  | NA  | 0  | 0  | Low-quality    | Genome-fragment | 2.4   | 0     |
| 59  | extracted_k141_19272  | 1051  | No  | NA  | 0  | 1  | Not-determined | Genome-fragment | NA    | 0     |
| 512 | extracted_k141_50926  | 1082  | No  | NA  | 0  | 0  | Low-quality    | Genome-fragment | 2.03  | 0     |
| 59  | extracted_k141_58444  | 2012  | No  | NA  | 0  | 0  | Not-determined | Genome-fragment | NA    | 0     |
| 59  | extracted_k141_26772  | 1290  | No  | NA  | 0  | 0  | Not-determined | Genome-fragment | NA    | 0     |
| 512 | vs_k141_163893  full  | 1082  | No  | NA  | 0  | 0  | Low-quality    | Genome-fragment | 2.8   | 0     |
| 59  | extracted_k141_57068  | 1118  | No  | NA  | 0  | 1  | Not-determined | Genome-fragment | NA    | 0     |
| 59  | extracted_k141_4115   | 33438 | No  | NA  | 33 | 0  | Medium-quality | Genome-fragment | 86.27 | 0     |
| 59  | extracted_k141_38261  | 11379 | No  | NA  | 0  | 3  | Not-determined | Genome-fragment | NA    | 0     |
| 59  | extracted_k141_26805  | 6114  | No  | NA  | 3  | 0  | Complete       | High-quality    | 100   | 0     |
| 59  | extracted_k141_38286  | 1280  | No  | NA  | 0  | 1  | Not-determined | Genome-fragment | NA    | 0     |
| 59  | extracted_k141_15519  | 1111  | No  | NA  | 0  | 1  | Not-determined | Genome-fragment | NA    | 0     |
| 59  | extracted_k141_4137   | 1085  | No  | NA  | 0  | 0  | Not-determined | Genome-fragment | NA    | 0     |
| 59  | extracted_k141_87556  | 2982  | No  | NA  | 0  | 0  | Not-determined | Genome-fragment | NA    | 0     |
| 59  | extracted_k141_42048  | 1848  | No  | NA  | 0  | 1  | Not-determined | Genome-fragment | NA    | 0     |
| 59  | extracted_k141_11720  | 1105  | No  | NA  | 0  | 1  | Not-determined | Genome-fragment | NA    | 0     |
| 59  | extracted_k141_87566  | 1379  | No  | NA  | 0  | 2  | Not-determined | Genome-fragment | NA    | 0     |
| 59  | extracted_k141_15545  | 3035  | No  | NA  | 0  | 1  | Not-determined | Genome-fragment | NA    | 0     |
| 59  | extracted_k141_19284  | 41326 | No  | NA  | 28 | 1  | Complete       | High-quality    | 100   | 0     |
| 59  | extracted_k141_79919  | 34073 | No  | NA  | 23 | 0  | Complete       | High-quality    | 100   | 0     |
| 59  | extracted_k141_4608   | 1082  | No  | NA  | 0  | 1  | Low-quality    | Genome-fragment | 0.67  | 0     |
| 59  | extracted_k141_68558  | 1138  | No  | NA  | 0  | 0  | Not-determined | Genome-fragment | NA    | 0     |
| 59  | extracted_k141_72340  | 3672  | No  | NA  | 0  | 3  | Not-determined | Genome-fragment | NA    | 0     |
| 517 | vs_k141_66907  full   | 1083  | Yes | 750 | 0  | 1  | Low-quality    | Genome-fragment | 0.47  | 30.75 |
| 59  | extracted_k141_68561  | 4316  | No  | NA  | 0  | 2  | Not-determined | Genome-fragment | NA    | 0     |
| 59  | extracted_k141_30776  | 1030  | No  | NA  | 0  | 1  | Not-determined | Genome-fragment | NA    | 0     |
| 59  | extracted_k141_465    | 1076  | No  | NA  | 0  | 0  | Not-determined | Genome-fragment | NA    | 0     |
| 513 | vs_92212  full        | 1083  | No  | NA  | 0  | 0  | Low-quality    | Genome-fragment | 2.79  | 0     |
| 514 | vs_k141_43092  full   | 1083  | No  | NA  | 0  | 0  | Low-quality    | Genome-fragment | 2.78  | 0     |
| 53  | extracted_k141_55244  | 1083  | No  | NA  | 0  | 0  | Low-quality    | Genome-fragment | 2.07  | 0     |
| 53  | vs_k141_146303  full  | 1083  | No  | NA  | 0  | 0  | Low-quality    | Genome-fragment | 2.13  | 0     |
| 53  | vs_k141_52678  full   | 1083  | No  | NA  | 0  | 2  | Low-quality    | Genome-fragment | 0.29  | 0     |
| 59  | extracted_k141_48616  | 1796  | No  | NA  | 0  | 3  | Not-determined | Genome-fragment | NA    | 0     |
| 59  | extracted_k141_7086   | 1062  | No  | NA  | 0  | 1  | Not-determined | Genome-fragment | NA    | 0     |
| 59  | extracted_k141_61027  | 5332  | No  | NA  | 0  | 1  | Not-determined | Genome-fragment | NA    | 0     |
| 53  | vs_k141_55184  full   | 1083  | No  | NA  | 0  | 0  | Low-quality    | Genome-fragment | 2.78  | 0     |
| 516 | extracted_115106      | 1083  | No  | NA  | 0  | 0  | Low-quality    | Genome-fragment | 1.19  | 0     |
| 59  | extracted_k141_79979  | 1494  | No  | NA  | 0  | 1  | Not-determined | Genome-fragment | NA    | 0     |
| 510 | extracted_117308      | 1083  | No  | NA  | 0  | 1  | Low-quality    | Genome-fragment | 2.17  | 0     |
| 52  | vs_k141_17479  full   | 1083  | No  | NA  | 0  | 0  | Low-quality    | Genome-fragment | 2.99  | 0     |
| 59  | extracted_k141_42166  | 5560  | No  | NA  | 0  | 2  | Not-determined | Genome-fragment | NA    | 0     |
| 52  | vs_k141_7008  full    | 1083  | No  | NA  | 1  | 0  | Low-quality    | Genome-fragment | 2.88  | 0     |
| 59  | extracted_k141_79995  | 1043  | No  | NA  | 0  | 0  | Not-determined | Genome-fragment | NA    | 0     |
| 59  | extracted_k141_546    | 1374  | No  | NA  | 0  | 0  | Not-determined | Genome-fragment | NA    | 0     |
| 59  | extracted_k141_26970  | 1062  | No  | NA  | 0  | 0  | Not-determined | Genome-fragment | NA    | 0     |
| 59  | extracted_k141_15693  | 4140  | No  | NA  | 0  | 1  | Not-determined | Genome-fragment | NA    | 0     |
| 59  | extracted_k141_15642  | 1083  | No  | NA  | 0  | 0  | Low-quality    | Genome-fragment | 1.75  | 0     |
| 58  | vs_k141_104812  full  | 1083  | No  | NA  | 0  | 1  | Low-quality    | Genome-fragment | 0.15  | 0     |
| 59  | extracted_k141_76134  | 2323  | No  | NA  | 0  | 1  | Not-determined | Genome-fragment | NA    | 0     |
| 517 | vs_k141_164243  full  | 1084  | No  | NA  | 0  | 0  | Low-quality    | Genome-fragment | 2.78  | 0     |
| 59  | extracted_k141_61094  | 1036  | No  | NA  | 0  | 1  | Not-determined | Genome-fragment | NA    | 0     |
| 517 | vs_k141_135548  full  | 1084  | No  | NA  | 0  | 0  | Low-quality    | Genome-fragment | 0.85  | 0     |
| 59  | vs_k141_35201  full   | 1084  | No  | NA  | 1  | 0  | Low-quality    | Genome-fragment | 2.61  | 0     |
| 511 | extracted_k141_49316  | 1084  | No  | NA  | 0  | 0  | Low-quality    | Genome-fragment | 2.51  | 0     |
| 59  | extracted_k141_80043  | 1126  | No  | NA  | 0  | 2  | Not-determined | Genome-fragment | NA    | 0     |
| 59  | extracted_k141_72451  | 1737  | No  | NA  | 0  | 1  | Not-determined | Genome-fragment | NA    | 0     |
| 59  | extracted_k141_83857  | 1662  | No  | NA  | 0  | 0  | Not-determined | Genome-fragment | NA    | 0     |
| 59  | extracted_k141_27023  | 1346  | No  | NA  | 0  | 1  | Not-determined | Genome-fragment | NA    | 0     |
| 59  | extracted_k141_87720  | 1279  | No  | NA  | 0  | 0  | Not-determined | Genome-fragment | NA    | 0     |
| 59  | extracted_k141_8008   | 1339  | No  | NA  | 0  | 0  | Not-determined | Genome-fragment | NA    | 0     |
| 59  | extracted_k141_41232  | 1586  | No  | NA  | 0  | 0  | Not-determined | Genome-fragment | NA    | 0     |
| 51  | vs_k141_81303  full   | 1084  | No  | NA  | 0  | 0  | Low-quality    | Genome-fragment | 2.64  | 0     |
| 51  | vs_k141_84471  full   | 1084  | No  | NA  | 0  | 0  | Low-quality    | Genome-fragment | 1.79  | 0     |
| 59  | extracted_k141_618    | 1994  | No  | NA  | 0  | 1  | Not-determined | Genome-fragment | NA    | 0     |
| 53  | extracted_k141_92112  | 1084  | No  | NA  | 0  | 0  | Low-quality    | Genome-fragment | 3.03  | 0     |
| 59  | extracted_k141_80081  | 1028  | No  | NA  | 0  | 0  | Not-determined | Genome-fragment | NA    | 0     |
| 52  | vs_k141_46797  full   | 1084  | No  | NA  | 0  | 0  | Low-quality    | Genome-fragment | 1.38  | 0     |
| 59  | extracted_k141_87778  | 3280  | No  | NA  | 0  | 2  | Not-determined | Genome-fragment | NA    | 0     |
| 59  | extracted_k141_53606  | 1038  | No  | NA  | 0  | 0  | Not-determined | Genome-fragment | NA    | 0     |
| 52  | vs_k141_105027  full  | 1084  | No  | NA  | 0  | 0  | Low-quality    | Genome-fragment | 2.31  | 0     |
| 59  | extracted_k141_34660  | 1263  | No  | NA  | 0  | 1  | Not-determined | Genome-fragment | NA    | 0     |
| 59  | extracted_k141_68624  | 1163  | No  | NA  | 0  | 1  | Not-determined | Genome-fragment | NA    | 0     |
| 55  | extracted_k141_20412  | 1084  | No  | NA  | 1  | 0  | Low-quality    | Genome-fragment | 2.65  | 0     |
| 59  | extracted_k141_53641  | 1160  | No  | NA  | 0  | 0  | Not-determined | Genome-fragment | NA    | 0     |
| 59  | extracted_k141_80145  | 1047  | No  | NA  | 0  | 1  | Not-determined | Genome-fragment | NA    | 0     |
| 59  | extracted_k141_64844  | 9233  | No  | NA  | 42 | 3  | High-quality   | High-quality    | 100   | 0     |
| 59  | extracted_k141_8094   | 1279  | No  | NA  | 0  | 0  | Not-determined | Genome-fragment | NA    | 0     |
| 59  | extracted_k141_45930  | 1535  | No  | NA  | 0  | 0  | Not-determined | Genome-fragment | NA    | 0     |
| 55  | vs_k141_36770  full   | 1084  | No  | NA  | 1  | 0  | Low-quality    | Genome-fragment | 1.97  | 0     |
| 59  | extracted_k141_57277  | 56189 | No  | NA  | 21 | 0  | Complete       | High-quality    | 100   | 0     |
| 59  | extracted_k141_87867  | 1339  | No  | NA  | 0  | 0  | Not-determined | Genome-fragment | NA    | 0     |
| 59  | extracted_k141_11085  | 1104  | No  | NA  | 0  | 0  | Not-determined | Genome-fragment | NA    | 0     |
| 59  | extracted_k141_15874  | 1579  | No  | NA  | 0  | 0  | Not-determined | Genome-fragment | NA    | 0     |
| 55  | vs_k141_56588  full   | 1084  | No  | NA  | 0  | 0  | Low-quality    | Genome-fragment | 2.46  | 0     |
| 57  | vs_12801  full        | 1084  | No  | NA  | 0  | 0  | Low-quality    | Genome-fragment | 2.27  | 0     |
| 59  | extracted_k141_64939  | 5390  | No  | NA  | 0  | 1  | Not-determined | Genome-fragment | NA    | 0     |
| 59  | extracted_k141_34736  | 13774 | No  | NA  | 8  | 0  | Medium-quality | Genome-fragment | 62.9  | 0     |
| 57  | vs_128244  full       | 1084  | No  | NA  | 1  | 0  | Low-quality    | Genome-fragment | 1.29  | 0     |



|                             |       |    |    |     |   |                |                 |    |       |
|-----------------------------|-------|----|----|-----|---|----------------|-----------------|----|-------|
| 59_extracted_k141_80448     | 3552  | No | NA | 0   | 0 | Not-determined | Genome-fragment | NA | 0     |
| 517_vs_k141_12842   2genome | 1086  | No | NA | 1   | 0 | Low-quality    | Genome-fragment | NA | 1.78  |
| 59_extracted_k141_12317     | 1213  | No | NA | 0   | 0 | Not-determined | Genome-fragment | NA | 0     |
| 59_extracted_k141_61530     | 1135  | No | NA | 0   | 1 | Not-determined | Genome-fragment | NA | 0     |
| 59_extracted_k141_57492     | 3971  | No | NA | 0   | 1 | Not-determined | Genome-fragment | NA | 0     |
| 59_extracted_k141_70709     | 1086  | No | NA | 1   | 0 | Low-quality    | Genome-fragment | NA | 18.23 |
| 59_extracted_k141_23571     | 18101 | No | NA | 0   | 4 | Not-determined | Genome-fragment | NA | 0     |
| 511_vs_k141_40461           | 1086  | No | NA | 0   | 0 | Low-quality    | Genome-fragment | NA | 2.03  |
| 59_extracted_k141_16167     | 1003  | No | NA | 1   | 1 | Not-determined | Genome-fragment | NA | 0     |
| 513_extracted_80374         | 1086  | No | NA | 0   | 1 | Low-quality    | Genome-fragment | NA | 0.19  |
| 513_extracted_116309        | 1086  | No | NA | 0   | 0 | Low-quality    | Genome-fragment | NA | 17.09 |
| 513_extracted_148066        | 1086  | No | NA | 0   | 0 | Low-quality    | Genome-fragment | NA | 1.92  |
| 59_extracted_k141_72894     | 3500  | No | NA | 0   | 1 | Not-determined | Genome-fragment | NA | 0     |
| 59_extracted_k141_4600      | 1366  | No | NA | 0   | 0 | Not-determined | Genome-fragment | NA | 0     |
| 59_extracted_k141_38992     | 1726  | No | NA | 0   | 1 | Not-determined | Genome-fragment | NA | 0     |
| 59_extracted_k141_34996     | 1357  | No | NA | 0   | 1 | Not-determined | Genome-fragment | NA | 0     |
| 59_extracted_k141_57529     | 3813  | No | NA | 0   | 4 | Not-determined | Genome-fragment | NA | 0     |
| 59_extracted_k141_35001     | 1138  | No | NA | 0   | 0 | Not-determined | Genome-fragment | NA | 0     |
| 59_extracted_k141_72908     | 1051  | No | NA | 0   | 0 | Not-determined | Genome-fragment | NA | 0     |
| 514_vs_k141_19955   full    | 1086  | No | NA | 0   | 0 | Low-quality    | Genome-fragment | NA | 3.13  |
| 59_extracted_k141_39012     | 1024  | No | NA | 0   | 1 | Not-determined | Genome-fragment | NA | 0     |
| 59_extracted_k141_934       | 5848  | No | NA | 8   | 0 | Medium-quality | Genome-fragment | NA | 62.07 |
| 514_vs_k141_63281   full    | 1086  | No | NA | 0   | 0 | Low-quality    | Genome-fragment | NA | 2.56  |
| 59_extracted_k141_31391     | 1081  | No | NA | 0   | 1 | Not-determined | Genome-fragment | NA | 0     |
| 59_extracted_k141_954       | 1653  | No | NA | 0   | 0 | Not-determined | Genome-fragment | NA | 0     |
| 57_vs_84049   2genome       | 1086  | No | NA | 2   | 0 | Low-quality    | Genome-fragment | NA | 2.37  |
| 516_vs_71180   full         | 1086  | No | NA | 0   | 1 | Low-quality    | Genome-fragment | NA | 0.43  |
| 59_extracted_k141_57599     | 1130  | No | NA | 0   | 0 | Not-determined | Genome-fragment | NA | 0     |
| 59_extracted_k141_72985     | 1212  | No | NA | 1   | 1 | Not-determined | Genome-fragment | NA | 0     |
| 512_extracted_k141_48450    | 1086  | No | NA | 1   | 0 | Low-quality    | Genome-fragment | NA | 17.71 |
| 59_extracted_k141_8251      | 1523  | No | NA | 0   | 1 | Not-determined | Genome-fragment | NA | 0     |
| 515_vs_17886   full         | 1086  | No | NA | 0   | 0 | Low-quality    | Genome-fragment | NA | 2.25  |
| 56_extracted_k141_32873     | 1086  | No | NA | 1   | 0 | Low-quality    | Genome-fragment | NA | 1.54  |
| 59_extracted_k141_19850     | 1469  | No | NA | 0   | 0 | Not-determined | Genome-fragment | NA | 0     |
| 59_extracted_k141_8262      | 3644  | No | NA | 0   | 1 | Not-determined | Genome-fragment | NA | 0     |
| 59_extracted_k141_63289     | 1316  | No | NA | 0   | 0 | Not-determined | Genome-fragment | NA | 0     |
| 59_extracted_k141_76513     | 4827  | No | NA | 0   | 4 | Not-determined | Genome-fragment | NA | 0     |
| 517_vs_k141_84815   full    | 1087  | No | NA | 1   | 0 | Low-quality    | Genome-fragment | NA | 3.04  |
| 59_extracted_k141_30193     | 1139  | No | NA | 1   | 1 | Not-determined | Genome-fragment | NA | 0     |
| 513_extracted_91904         | 1087  | No | NA | 1   | 0 | Low-quality    | Genome-fragment | NA | 3.72  |
| 59_extracted_k141_12527     | 4188  | No | NA | 0   | 1 | Not-determined | Genome-fragment | NA | 0     |
| 514_extracted_k141_1617     | 1087  | No | NA | 0   | 0 | Low-quality    | Genome-fragment | NA | 1.5   |
| 59_extracted_k141_16432     | 1024  | No | NA | 0   | 0 | Not-determined | Genome-fragment | NA | 0     |
| 59_extracted_k141_54257     | 1410  | No | NA | 0   | 1 | Not-determined | Genome-fragment | NA | 0     |
| 59_extracted_k141_1071      | 4979  | No | NA | 0   | 0 | Not-determined | Genome-fragment | NA | 0     |
| 514_vs_k141_5340   full     | 1087  | No | NA | 0   | 0 | Low-quality    | Genome-fragment | NA | 2.34  |
| 59_extracted_k141_42841     | 1165  | No | NA | 0   | 0 | Not-determined | Genome-fragment | NA | 0     |
| 514_vs_k141_59037   2genome | 1087  | No | NA | 1   | 0 | Low-quality    | Genome-fragment | NA | 2.51  |
| 59_extracted_k141_19957     | 1155  | No | NA | 1   | 1 | Not-determined | Genome-fragment | NA | 0     |
| 53_vs_k141_102413   2genome | 1087  | No | NA | 1   | 0 | Low-quality    | Genome-fragment | NA | 1.67  |
| 59_extracted_k141_8366      | 1940  | No | NA | 0   | 1 | Not-determined | Genome-fragment | NA | 0     |
| 59_extracted_k141_43865     | 1212  | No | NA | 0   | 1 | Not-determined | Genome-fragment | NA | 0     |
| 55_extracted_k141_19214     | 1087  | No | NA | 1   | 0 | Low-quality    | Genome-fragment | NA | 4.96  |
| 59_extracted_k141_1131      | 1065  | No | NA | 0   | 0 | Not-determined | Genome-fragment | NA | 0     |
| 59_extracted_k141_84250     | 3064  | No | NA | 0   | 3 | Not-determined | Genome-fragment | NA | 0     |
| 55_vs_k141_88287   2genome  | 1087  | No | NA | 1   | 0 | Low-quality    | Genome-fragment | NA | 2.69  |
| 59_extracted_k141_39221     | 1909  | No | NA | 0   | 2 | Not-determined | Genome-fragment | NA | 0     |
| 59_extracted_k141_61670     | 5794  | No | NA | 0   | 1 | Not-determined | Genome-fragment | NA | 0     |
| 57_extracted_26937          | 1087  | No | NA | 0   | 0 | Low-quality    | Genome-fragment | NA | 17.06 |
| 516_extracted_63489         | 1087  | No | NA | 0   | 0 | Low-quality    | Genome-fragment | NA | 2.64  |
| 59_extracted_k141_57740     | 1107  | No | NA | 0   | 0 | Not-determined | Genome-fragment | NA | 0     |
| 59_extracted_k141_11647     | 1990  | No | NA | 0   | 0 | Not-determined | Genome-fragment | NA | 0     |
| 59_extracted_k141_27660     | 1149  | No | NA | 0   | 1 | Not-determined | Genome-fragment | NA | 0     |
| 516_vs_158279   full        | 1087  | No | NA | 0   | 0 | Low-quality    | Genome-fragment | NA | 2.22  |
| 59_extracted_k141_4863      | 1012  | No | NA | 0   | 0 | Not-determined | Genome-fragment | NA | 0     |
| 59_extracted_k141_80519     | 1118  | No | NA | 0   | 0 | Not-determined | Genome-fragment | NA | 0     |
| 59_extracted_k141_35300     | 3671  | No | NA | 0   | 1 | Not-determined | Genome-fragment | NA | 0     |
| 510_vs_22617   2genome      | 1087  | No | NA | 1   | 0 | Low-quality    | Genome-fragment | NA | 2.18  |
| 59_extracted_k141_11877     | 3406  | No | NA | 0   | 0 | Not-determined | Genome-fragment | NA | 0     |
| 512_extracted_k141_59832    | 1087  | No | NA | 0   | 0 | Low-quality    | Genome-fragment | NA | 1.72  |
| 59_extracted_k141_35345     | 1412  | No | NA | 0   | 2 | Not-determined | Genome-fragment | NA | 0     |
| 54_extracted_18450          | 1087  | No | NA | 0   | 0 | Low-quality    | Genome-fragment | NA | 1.29  |
| 59_extracted_k141_1247      | 3784  | No | NA | 0   | 3 | Not-determined | Genome-fragment | NA | 0     |
| 59_extracted_k141_20315     | 1118  | No | NA | 0   | 0 | Not-determined | Genome-fragment | NA | 0     |
| 59_extracted_k141_61772     | 1589  | No | NA | 0   | 1 | Not-determined | Genome-fragment | NA | 0     |
| 58_vs_k141_59936   full     | 1087  | No | NA | 2   | 0 | Low-quality    | Genome-fragment | NA | 1.13  |
| 517_vs_k141_68634   full    | 1088  | No | NA | 1   | 0 | Low-quality    | Genome-fragment | NA | 2.32  |
| 59_extracted_k141_27161     | 1088  | No | NA | 0   | 0 | Low-quality    | Genome-fragment | NA | 1.38  |
| 59_vs_k141_21314   2genome  | 1088  | No | NA | 0   | 0 | Low-quality    | Genome-fragment | NA | 3.03  |
| 59_extracted_k141_46626     | 1083  | No | NA | 0   | 0 | Not-determined | Genome-fragment | NA | 0     |
| 59_extracted_k141_57833     | 1245  | No | NA | 0   | 0 | Not-determined | Genome-fragment | NA | 0     |
| 59_extracted_k141_39417     | 1310  | No | NA | 0   | 0 | Not-determined | Genome-fragment | NA | 0     |
| 59_extracted_k141_31740     | 1324  | No | NA | 0   | 0 | Not-determined | Genome-fragment | NA | 0     |
| 511_vs_k141_2603   2genome  | 1088  | No | NA | 1   | 0 | Low-quality    | Genome-fragment | NA | 2.45  |
| 514_extracted_k141_8273     | 1088  | No | NA | 1   | 0 | Low-quality    | Genome-fragment | NA | 0.6   |
| 59_extracted_k141_31753     | 1987  | No | NA | 0   | 1 | Not-determined | Genome-fragment | NA | 0     |
| 514_extracted_k141_91780    | 1088  | No | NA | 0   | 1 | Low-quality    | Genome-fragment | NA | 0.26  |
| 59_extracted_k141_88564     | 1185  | No | NA | 0   | 1 | Not-determined | Genome-fragment | NA | 0     |
| 59_extracted_k141_72311     | 38073 | No | NA | 287 | 0 | Medium-quality | Genome-fragment | NA | 70.19 |
| 59_extracted_k141_31788     | 1152  | No | NA | 0   | 0 | Not-determined | Genome-fragment | NA | 0     |
| 59_extracted_k141_23893     | 1602  | No | NA | 0   | 1 | Not-determined | Genome-fragment | NA | 0     |
| 51_extracted_k141_41842     | 1088  | No | NA | 0   | 0 | Low-quality    | Genome-fragment | NA | 1.8   |
| 59_extracted_k141_31819     | 1213  | No | NA | 0   | 1 | Not-determined | Genome-fragment | NA | 0     |
| 51_extracted_k141_25626     | 1088  | No | NA | 0   | 0 | Low-quality    | Genome-fragment | NA | 2.62  |
| 59_extracted_k141_23901     | 5984  | No | NA | 3   | 0 | High-quality   | Genome-fragment | NA | 100   |
| 51_extracted_k141_52827     | 1088  | No | NA | 0   | 1 | Low-quality    | Genome-fragment | NA | 0.66  |
| 59_extracted_k141_5131      | 1796  | No | NA | 0   | 2 | Not-determined | Genome-fragment | NA | 0     |
| 51_vs_k141_5371   full      | 1088  | No | NA | 0   | 1 | Low-quality    | Genome-fragment | NA | 1.02  |
| 51_vs_k141_13705   full     | 1088  | No | NA | 0   | 0 | Low-quality    | Genome-fragment | NA | 2.73  |
| 59_extracted_k141_20288     | 1212  | No | NA | 0   | 1 | Not-determined | Genome-fragment | NA | 0     |
| 53_extracted_k141_66984     | 1088  | No | NA | 1   | 0 | Low-quality    | Genome-fragment | NA | 2     |
| 59_extracted_k141_16668     | 1376  | No | NA | 1   | 0 | Not-determined | Genome-fragment | NA | 0     |
| 53_vs_k141_73430   full     | 1088  | No | NA | 2   | 0 | Low-quality    | Genome-fragment | NA | 2.25  |
| 53_vs_k141_74728   full     | 1088  | No | NA | 1   | 0 | Low-quality    | Genome-fragment | NA | 2.45  |
| 59_extracted_k141_54426     | 1088  | No | NA | 1   | 0 | Not-determined | Genome-fragment | NA | 0     |
| 55_vs_k141_6335   full      | 1088  | No | NA | 0   | 0 | Low-quality    | Genome-fragment | NA | 1.26  |
| 59_extracted_k141_69324     | 1056  | No | NA | 0   | 0 | Not-determined | Genome-fragment | NA | 0     |
| 55_vs_k141_17682   full     | 1088  | No | NA | 0   | 1 | Low-quality    | Genome-fragment | NA | 0.75  |
| 59_extracted_k141_58032     | 1108  | No | NA | 0   | 0 | Not-determined | Genome-fragment | NA | 0     |
| 59_extracted_k141_46788     | 1152  | No | NA | 0   | 1 | Not-determined | Genome-fragment | NA | 0     |
| 59_extracted_k141_80851     | 1252  | No | NA | 0   | 0 | Not-determined | Genome-fragment | NA | 0     |
| 59_extracted_k141_76769     | 88250 | No | NA | 14  | 0 | High-quality   | Genome-fragment | NA | 97.31 |
| 55_vs_k141_35018   2genome  | 1088  | No | NA | 2   | 0 | Low-quality    | Genome-fragment | NA | 1.72  |
| 57_extracted_84334          | 1088  | No | NA | 0   | 0 | Low-quality    | Genome-fragment | NA | 0.59  |
| 59_extracted_k141_69285     | 1019  | No | NA | 0   | 1 | Not-determined | Genome-fragment | NA | 0     |
| 59_extracted_k141_76779     | 2860  | No | NA | 0   | 0 | Not-determined | Genome-fragment | NA | 0     |
| 59_extracted_k141_76783     | 1312  | No | NA | 0   | 1 | Not-determined | Genome-fragment | NA | 0     |
| 57_vs_14857   full          | 1088  | No | NA | 0   | 0 | Low-quality    | Genome-fragment | NA | 0.74  |
| 57_vs_47755   full          | 1088  | No | NA | 2   | 0 | Low-quality    | Genome-fragment | NA | 2.81  |
| 59_extracted_k141_5316      | 1047  | No | NA | 0   | 1 | Not-determined | Genome-fragment | NA | 0     |
| 59_extracted_k141_65780     | 1086  | No | NA | 0   | 1 | Not-determined | Genome-fragment | NA | 0     |
| 59_extracted_k141_39537     | 1349  | No | NA | 0   | 0 | Not-determined | Genome-fragment | NA | 0     |
| 510_extracted_18947         | 1088  | No | NA | 0   | 0 | Low-quality    | Genome-fragment | NA | 0.64  |
| 59_extracted_k141_20447     | 1121  | No | NA | 0   | 1 | Not-determined | Genome-fragment | NA | 0     |
| 52_extracted_k141_11048     | 1088  | No | NA | 0   | 0 | Low-quality    | Genome-fragment | NA | 1.13  |
| 58_extracted_k141_63358     | 1088  | No | NA | 0   | 0 | Low-quality    | Genome-fragment | NA | 1.87  |
| 58_extracted_k141_111334    | 1088  | No | NA | 1   | 0 | Low-quality    | Genome-fragment | NA | 2.58  |
| 59_vs_k141_63371   full     | 1089  | No | NA | 2   | 0 | Low-quality    | Genome-fragment | NA | 2.69  |
| 59_extracted_k141_31216     | 2334  | No | NA | 0   | 1 | Not-determined | Genome-fragment | NA | 0     |
| 59_extracted_k141_20491     | 1409  | No | NA | 0   | 1 | Not-determined | Genome-fragment | NA | 0     |
| 59_extracted_k141_28093     | 1178  | No | NA | 0   | 1 | Not-determined | Genome-fragment | NA | 0     |
| 59_extracted_k141_73520     | 1346  | No | NA | 0   | 1 | Not-determined | Genome-fragment | NA | 0     |
| 59_extracted_k141_35749     | 1357  | No | NA | 0   | 2 | Not-determined | Genome-fragment | NA | 0     |
| 59_extracted_k141_28105     | 1143  | No | NA | 0   | 1 | Not-determined | Genome-fragment | NA | 0     |
| 511_extracted_k141_22454    | 1089  | No | NA | 0   | 0 | Low-quality    | Genome-fragment | NA | 0.83  |
| 511_vs_k141_86436   2genome | 1089  | No | NA | 1   | 0 | Low-quality    | Genome-fragment | NA | 2.52  |
| 514_vs_k141_81224   full    | 1089  | No | NA | 3   | 0 | Low-quality    | Genome-fragment | NA | 3.59  |
| 59_extracted_k141_32180     | 1605  | No | NA | 0   | 2 | Not-determined | Genome-fragment | NA | 0     |
| 514_vs_k141_44606   full    | 1089  | No | NA | 0   | 0 | Low-quality    | Genome-fragment | NA | 1.51  |
| 59_extracted_k141_32195     | 1839  | No | NA | 0   | 1 | Not-determined | Genome-fragment | NA | 0     |
| 59_extracted_k141_16931     | 1551  | No | NA | 0   | 1 | Not-determined | Genome-fragment | NA | 0     |
| 59_extracted_k141_46824     | 1071  | No | NA | 0   | 2 | Not-determined | Genome-fragment | NA | 0     |
| 59_extracted_k141_5431      | 4359  | No | NA | 0   | 1 | Not-determined | Genome-fragment | NA | 0     |
| 514_vs_k141_18923   2genome | 1089  | No | NA | 1   |   |                |                 |    |       |



|                           |       |    |    |    |   |                |                 |       |   |
|---------------------------|-------|----|----|----|---|----------------|-----------------|-------|---|
| 59_extracted_k141_91136   | 1429  | No | NA | 0  | 1 | Not-determined | Genome-fragment | NA    | 0 |
| 59_extracted_k141_81186   | 1262  | No | NA | 0  | 1 | Not-determined | Genome-fragment | NA    | 0 |
| 59_extracted_k141_28347   | 1001  | No | NA | 0  | 1 | Not-determined | Genome-fragment | NA    | 0 |
| 53_extracted_k141_104533  | 1090  | No | NA | 0  | 1 | Low-quality    | Genome-fragment | 1.98  | 0 |
| 59_extracted_k141_17185   | 3341  | No | NA | 0  | 0 | Not-determined | Genome-fragment | NA    | 0 |
| 59_extracted_k141_81215   | 3209  | No | NA | 0  | 2 | Not-determined | Genome-fragment | NA    | 0 |
| 59_extracted_k141_18891   | 1675  | No | NA | 0  | 0 | Not-determined | Genome-fragment | NA    | 0 |
| 59_extracted_k141_5661    | 1421  | No | NA | 0  | 0 | Not-determined | Genome-fragment | NA    | 0 |
| 59_extracted_k141_20707   | 1316  | No | NA | 0  | 0 | Not-determined | Genome-fragment | NA    | 0 |
| 55_vs_k141_7647  H2gene   | 1090  | No | NA | 1  | 0 | Low-quality    | Genome-fragment | 1.83  | 0 |
| 57_vs_56769  full         | 1090  | No | NA | 1  | 0 | Low-quality    | Genome-fragment | 2.71  | 0 |
| 57_vs_110938  full        | 1090  | No | NA | 0  | 0 | Low-quality    | Genome-fragment | 1.87  | 0 |
| 516_extracted_12819       | 1090  | No | NA | 1  | 0 | Low-quality    | Genome-fragment | 22.84 | 0 |
| 56_vs_k141_51975  full    | 1090  | No | NA | 1  | 0 | Low-quality    | Genome-fragment | 2.84  | 0 |
| 58_vs_k141_20794  full    | 1090  | No | NA | 0  | 0 | Low-quality    | Genome-fragment | 2.58  | 0 |
| 59_extracted_k141_43672   | 1155  | No | NA | 0  | 1 | Not-determined | Genome-fragment | NA    | 0 |
| 59_extracted_k141_58362   | 1473  | No | NA | 0  | 1 | Not-determined | Genome-fragment | NA    | 0 |
| 58_vs_k141_207170  full   | 1090  | No | NA | 0  | 0 | Low-quality    | Genome-fragment | 2.45  | 0 |
| 59_extracted_k141_65917   | 5211  | No | NA | 0  | 2 | Not-determined | Genome-fragment | NA    | 0 |
| 59_extracted_k141_43686   | 3599  | No | NA | 0  | 0 | Not-determined | Genome-fragment | NA    | 0 |
| 59_extracted_k141_24523   | 1936  | No | NA | 0  | 2 | Not-determined | Genome-fragment | NA    | 0 |
| 59_extracted_k141_75675   | 1711  | No | NA | 0  | 0 | Not-determined | Genome-fragment | NA    | 0 |
| 59_extracted_k141_43710   | 1328  | No | NA | 0  | 0 | Not-determined | Genome-fragment | NA    | 0 |
| 59_vs_k141_88793  full    | 1091  | No | NA | 0  | 0 | Low-quality    | Genome-fragment | 2.58  | 0 |
| 59_extracted_k141_1965    | 1319  | No | NA | 0  | 0 | Not-determined | Genome-fragment | NA    | 0 |
| 59_extracted_k141_20781   | 1010  | No | NA | 0  | 0 | Not-determined | Genome-fragment | NA    | 0 |
| 51_extracted_k141_81236   | 1091  | No | NA | 0  | 1 | Low-quality    | Genome-fragment | 0.52  | 0 |
| 59_extracted_k141_13186   | 1026  | No | NA | 0  | 0 | Not-determined | Genome-fragment | NA    | 0 |
| 51_vs_k141_121073  full   | 1091  | No | NA | 0  | 0 | Low-quality    | Genome-fragment | 2.31  | 0 |
| 59_extracted_k141_9190    | 1123  | No | NA | 0  | 0 | Not-determined | Genome-fragment | NA    | 0 |
| 51_vs_k141_53319  full    | 1091  | No | NA | 1  | 0 | Low-quality    | Genome-fragment | 2.73  | 0 |
| 59_extracted_k141_23388   | 2336  | No | NA | 0  | 0 | Not-determined | Genome-fragment | NA    | 0 |
| 59_extracted_k141_39992   | 1085  | No | NA | 0  | 2 | Not-determined | Genome-fragment | NA    | 0 |
| 59_extracted_k141_73708   | 1206  | No | NA | 0  | 1 | Not-determined | Genome-fragment | NA    | 0 |
| 55_extracted_k141_22457   | 1091  | No | NA | 2  | 0 | Low-quality    | Genome-fragment | 2.46  | 0 |
| 59_extracted_k141_51709   | 1769  | No | NA | 1  | 0 | Not-determined | Genome-fragment | NA    | 0 |
| 59_extracted_k141_81333   | 3956  | No | NA | 0  | 0 | Not-determined | Genome-fragment | NA    | 0 |
| 55_vs_k141_138270  full   | 1091  | No | NA | 0  | 1 | Low-quality    | Genome-fragment | 1.48  | 0 |
| 59_extracted_k141_88843   | 1211  | No | NA | 0  | 1 | Not-determined | Genome-fragment | NA    | 0 |
| 59_extracted_k141_69945   | 3312  | No | NA | 0  | 2 | Not-determined | Genome-fragment | NA    | 0 |
| 59_extracted_k141_47102   | 1964  | No | NA | 0  | 0 | Not-determined | Genome-fragment | NA    | 0 |
| 59_extracted_k141_20844   | 1130  | No | NA | 0  | 0 | Not-determined | Genome-fragment | NA    | 0 |
| 59_extracted_k141_81345   | 3301  | No | NA | 0  | 0 | Not-determined | Genome-fragment | NA    | 0 |
| 57_vs_9310  full          | 1091  | No | NA | 0  | 0 | Low-quality    | Genome-fragment | 2.16  | 0 |
| 59_extracted_k141_58446   | 5423  | No | NA | 0  | 0 | Not-determined | Genome-fragment | NA    | 0 |
| 59_extracted_k141_77294   | 1358  | No | NA | 0  | 1 | Not-determined | Genome-fragment | NA    | 0 |
| 59_extracted_k141_17375   | 1179  | No | NA | 0  | 0 | Not-determined | Genome-fragment | NA    | 0 |
| 59_extracted_k141_55106   | 1365  | No | NA | 0  | 0 | Not-determined | Genome-fragment | NA    | 0 |
| 59_extracted_k141_24658   | 1353  | No | NA | 0  | 1 | Not-determined | Genome-fragment | NA    | 0 |
| 59_extracted_k141_20880   | 1664  | No | NA | 0  | 0 | Not-determined | Genome-fragment | NA    | 0 |
| 516_extracted_39772       | 1091  | No | NA | 0  | 0 | Low-quality    | Genome-fragment | 2.32  | 0 |
| 59_extracted_k141_22477   | 1281  | No | NA | 0  | 0 | Not-determined | Genome-fragment | NA    | 0 |
| 510_vs_95651  full        | 1091  | No | NA | 0  | 0 | Low-quality    | Genome-fragment | 3.22  | 0 |
| 59_extracted_k141_77343   | 1117  | No | NA | 0  | 0 | Not-determined | Genome-fragment | NA    | 0 |
| 59_extracted_k141_24691   | 1155  | No | NA | 0  | 1 | Not-determined | Genome-fragment | NA    | 0 |
| 512_vs_k141_28671  full   | 1091  | No | NA | 0  | 1 | Low-quality    | Genome-fragment | 2.33  | 0 |
| 512_vs_k141_154828  full  | 1091  | No | NA | 0  | 2 | Low-quality    | Genome-fragment | 1.47  | 0 |
| 59_extracted_k141_13159   | 1419  | No | NA | 0  | 0 | Not-determined | Genome-fragment | NA    | 0 |
| 59_extracted_k141_32500   | 2362  | No | NA | 0  | 0 | Not-determined | Genome-fragment | NA    | 0 |
| 59_extracted_k141_55146   | 1491  | No | NA | 0  | 0 | Not-determined | Genome-fragment | NA    | 0 |
| 58_vs_k141_53768  H2gene  | 1091  | No | NA | 1  | 0 | Low-quality    | Genome-fragment | 1.82  | 0 |
| 517_extracted_k141_19726  | 2092  | No | NA | 0  | 1 | Low-quality    | Genome-fragment | 0.47  | 0 |
| 59_extracted_k141_88874   | 1602  | No | NA | 0  | 0 | Not-determined | Genome-fragment | NA    | 0 |
| 59_extracted_k141_24707   | 1280  | No | NA | 0  | 1 | Not-determined | Genome-fragment | NA    | 0 |
| 59_extracted_k141_66045   | 1228  | No | NA | 0  | 0 | Not-determined | Genome-fragment | NA    | 0 |
| 59_extracted_k141_5826    | 1143  | No | NA | 0  | 2 | Not-determined | Genome-fragment | NA    | 0 |
| 517_vs_k141_42995  H2gene | 1092  | No | NA | 0  | 0 | Low-quality    | Genome-fragment | 2.54  | 0 |
| 511_vs_k141_78195  full   | 1092  | No | NA | 1  | 0 | Low-quality    | Genome-fragment | 0.58  | 0 |
| 59_extracted_k141_47228   | 1779  | No | NA | 0  | 0 | Not-determined | Genome-fragment | NA    | 0 |
| 59_extracted_k141_17441   | 1874  | No | NA | 0  | 0 | Not-determined | Genome-fragment | NA    | 0 |
| 511_vs_k141_87340  full   | 1092  | No | NA | 0  | 0 | Low-quality    | Genome-fragment | 2.24  | 0 |
| 59_extracted_k141_24749   | 3918  | No | NA | 0  | 0 | Not-determined | Genome-fragment | NA    | 0 |
| 511_vs_k141_30414  full   | 1092  | No | NA | 0  | 0 | Low-quality    | Genome-fragment | 2.77  | 0 |
| 59_extracted_k141_43907   | 1720  | No | NA | 0  | 1 | Not-determined | Genome-fragment | NA    | 0 |
| 514_vs_k141_110101  full  | 1092  | No | NA | 2  | 0 | Low-quality    | Genome-fragment | 3.53  | 0 |
| 55_extracted_k141_110159  | 1092  | No | NA | 3  | 0 | Low-quality    | Genome-fragment | 3.26  | 0 |
| 59_extracted_k141_28639   | 1107  | No | NA | 0  | 2 | Not-determined | Genome-fragment | NA    | 0 |
| 59_extracted_k141_38220   | 1134  | No | NA | 0  | 2 | Not-determined | Genome-fragment | NA    | 0 |
| 516_vs_70414  full        | 1092  | No | NA | 0  | 0 | Low-quality    | Genome-fragment | 1.83  | 0 |
| 59_extracted_k141_47276   | 1116  | No | NA | 0  | 1 | Not-determined | Genome-fragment | NA    | 0 |
| 59_extracted_k141_55187   | 4387  | No | NA | 0  | 1 | Not-determined | Genome-fragment | NA    | 0 |
| 516_vs_57670  full        | 1092  | No | NA | 0  | 0 | Low-quality    | Genome-fragment | 2.2   | 0 |
| 516_vs_156329  H2gene     | 1092  | No | NA | 1  | 0 | Low-quality    | Genome-fragment | 1.95  | 0 |
| 510_extracted_8952        | 1092  | No | NA | 0  | 0 | Low-quality    | Genome-fragment | 2.29  | 0 |
| 512_vs_k141_166796  full  | 1092  | No | NA | 0  | 0 | Low-quality    | Genome-fragment | 2.65  | 0 |
| 512_vs_k141_21664  full   | 1092  | No | NA | 1  | 0 | Low-quality    | Genome-fragment | 1.76  | 0 |
| 515_extracted_13793       | 1092  | No | NA | 0  | 0 | Low-quality    | Genome-fragment | 0.75  | 0 |
| 59_extracted_k141_2108    | 1667  | No | NA | 0  | 1 | Not-determined | Genome-fragment | NA    | 0 |
| 53_extracted_k141_14227   | 1092  | No | NA | 0  | 0 | Low-quality    | Genome-fragment | 1.77  | 0 |
| 511_vs_k141_75722  full   | 1093  | No | NA | 1  | 0 | Low-quality    | Genome-fragment | 1.64  | 0 |
| 59_extracted_k141_66139   | 1152  | No | NA | 0  | 0 | Not-determined | Genome-fragment | NA    | 0 |
| 59_extracted_k141_66150   | 1780  | No | NA | 0  | 0 | Not-determined | Genome-fragment | NA    | 0 |
| 59_extracted_k141_89028   | 1195  | No | NA | 0  | 1 | Not-determined | Genome-fragment | NA    | 0 |
| 59_extracted_k141_13504   | 1489  | No | NA | 0  | 1 | Not-determined | Genome-fragment | NA    | 0 |
| 59_extracted_k141_40283   | 1253  | No | NA | 0  | 0 | Not-determined | Genome-fragment | NA    | 0 |
| 59_extracted_k141_5957    | 3815  | No | NA | 0  | 0 | Not-determined | Genome-fragment | NA    | 0 |
| 513_extracted_82067       | 1093  | No | NA | 0  | 0 | Low-quality    | Genome-fragment | 1.69  | 0 |
| 59_extracted_k141_5963    | 2157  | No | NA | 0  | 1 | Not-determined | Genome-fragment | NA    | 0 |
| 59_extracted_k141_24881   | 1492  | No | NA | 0  | 1 | Not-determined | Genome-fragment | NA    | 0 |
| 59_extracted_k141_28771   | 2714  | No | NA | 0  | 0 | Not-determined | Genome-fragment | NA    | 0 |
| 59_extracted_k141_81547   | 1188  | No | NA | 0  | 0 | Not-determined | Genome-fragment | NA    | 0 |
| 514_vs_k141_104029  full  | 1093  | No | NA | 0  | 0 | Low-quality    | Genome-fragment | 1.77  | 0 |
| 514_vs_k141_13167  full   | 1093  | No | NA | 1  | 0 | Low-quality    | Genome-fragment | 2.6   | 0 |
| 59_extracted_k141_28794   | 1055  | No | NA | 0  | 0 | Not-determined | Genome-fragment | NA    | 0 |
| 51_extracted_k141_36381   | 1093  | No | NA | 0  | 1 | Low-quality    | Genome-fragment | 2.6   | 0 |
| 59_extracted_k141_36375   | 3496  | No | NA | 0  | 3 | Not-determined | Genome-fragment | NA    | 0 |
| 59_extracted_k141_44101   | 2428  | No | NA | 0  | 0 | Not-determined | Genome-fragment | NA    | 0 |
| 59_extracted_k141_2221    | 2081  | No | NA | 0  | 1 | Not-determined | Genome-fragment | NA    | 0 |
| 59_extracted_k141_85234   | 1514  | No | NA | 0  | 0 | Not-determined | Genome-fragment | NA    | 0 |
| 59_extracted_k141_62736   | 1353  | No | NA | 0  | 0 | Not-determined | Genome-fragment | NA    | 0 |
| 59_extracted_k141_81631   | 1180  | No | NA | 0  | 2 | Not-determined | Genome-fragment | NA    | 0 |
| 59_extracted_k141_85107   | 3673  | No | NA | 0  | 0 | Not-determined | Genome-fragment | NA    | 0 |
| 51_vs_k141_85869  H2gene  | 1093  | No | NA | 2  | 0 | Low-quality    | Genome-fragment | 2.26  | 0 |
| 59_extracted_k141_66213   | 1204  | No | NA | 0  | 0 | Not-determined | Genome-fragment | NA    | 0 |
| 59_extracted_k141_26432   | 1069  | No | NA | 0  | 0 | Not-determined | Genome-fragment | NA    | 0 |
| 59_extracted_k141_9600    | 1771  | No | NA | 0  | 1 | Not-determined | Genome-fragment | NA    | 0 |
| 53_extracted_k141_25462   | 1093  | No | NA | 1  | 0 | Low-quality    | Genome-fragment | 1.26  | 0 |
| 59_extracted_k141_36461   | 1451  | No | NA | 0  | 0 | Not-determined | Genome-fragment | NA    | 0 |
| 59_extracted_k141_70236   | 15788 | No | NA | 10 | 0 | Medium-quality | Genome-fragment | 67.84 | 0 |
| 59_extracted_k141_74038   | 2447  | No | NA | 0  | 1 | Not-determined | Genome-fragment | NA    | 0 |
| 59_extracted_k141_28923   | 1049  | No | NA | 0  | 1 | Not-determined | Genome-fragment | NA    | 0 |
| 53_vs_k141_77653  full    | 1093  | No | NA | 0  | 0 | Low-quality    | Genome-fragment | 1.37  | 0 |
| 516_extracted_168173      | 1093  | No | NA | 1  | 0 | Low-quality    | Genome-fragment | 1     | 0 |
| 516_vs_44425  full        | 1093  | No | NA | 1  | 0 | Low-quality    | Genome-fragment | 2.26  | 0 |
| 59_extracted_k141_81682   | 2003  | No | NA | 0  | 0 | Not-determined | Genome-fragment | NA    | 0 |
| 516_vs_108796  full       | 1093  | No | NA | 1  | 0 | Low-quality    | Genome-fragment | 1.76  | 0 |
| 59_extracted_k141_55400   | 1430  | No | NA | 0  | 0 | Not-determined | Genome-fragment | NA    | 0 |
| 59_extracted_k141_9674    | 1550  | No | NA | 0  | 2 | Not-determined | Genome-fragment | NA    | 0 |
| 59_extracted_k141_66331   | 1145  | No | NA | 0  | 0 | Not-determined | Genome-fragment | NA    | 0 |
| 516_vs_129364  full       | 1093  | No | NA | 0  | 0 | Low-quality    | Genome-fragment | 1.48  | 0 |
| 59_extracted_k141_50888   | 14848 | No | NA | 0  | 4 | Not-determined | Genome-fragment | NA    | 0 |
| 59_extracted_k141_17723   | 1078  | No | NA | 0  | 0 | Not-determined | Genome-fragment | NA    | 0 |
| 59_extracted_k141_74117   | 2399  | No | NA | 0  | 4 | Not-determined | Genome-fragment | NA    | 0 |
| 59_extracted_k141_36576   | 1313  | No | NA | 0  | 0 | Not-determined | Genome-fragment | NA    | 0 |
| 59_extracted_k141_9718    | 1058  | No | NA | 0  | 1 | Not-determined | Genome-fragment | NA    | 0 |
| 56_vs_k141_9436  full     | 1093  | No | NA | 0  | 0 | Low-quality    | Genome-fragment | 2.79  | 0 |
| 59_extracted_k141_58822   | 3940  | No | NA | 0  | 1 | Not-determined | Genome-fragment | NA    | 0 |
| 58_vs_k141_199717  full   | 1093  | No | NA | 0  | 1 | Low-quality    | Genome-fragment | 0.48  | 0 |
| 59_extracted_k141_9741    | 1061  | No | NA | 0  | 1 | Not-determined | Genome-fragment | NA    | 0 |
| 59_extracted_k141_58845   | 1357  | No | NA | 0  | 2 | Not-determined | Genome-fragment | NA    | 0 |
| 59_extracted_k141_21337   | 1338  | No | NA | 0  | 1 | Not-determined | Genome-fragment | NA    | 0 |
| 59_extracted_k141_81753   | 1096  | No | NA | 0  | 0 | Not-determined | Genome-fragment | NA    | 0 |
| 59_extracted_k141_36623   | 2760  | No | NA | 0  | 0 | Not-determined | Genome-fragment | NA    | 0 |
| 58_vs_k141_20591  full    | 1093  | No | NA | 0  | 0 | Low-quality    | Genome-fragment | 0.63  | 0 |
| 59_extract                |       |    |    |    |   |                |                 |       |   |



|                            |       |    |    |   |   |                |                 |    |      |
|----------------------------|-------|----|----|---|---|----------------|-----------------|----|------|
| 59_extracted_k141_66576    | 1168  | No | NA | 0 | 0 | Not-determined | Genome-fragment | NA | 0    |
| 59_extracted_k141_29215    | 3413  | No | NA | 0 | 2 | Not-determined | Genome-fragment | NA | 0    |
| 510_extracted_78510        | 1094  | No | NA | 1 | 0 | Low-quality    | Genome-fragment | NA | 1.74 |
| 59_extracted_k141_59039    | 5248  | No | NA | 0 | 5 | Not-determined | Genome-fragment | NA | 0    |
| 59_extracted_k141_9947     | 1097  | No | NA | 0 | 1 | Not-determined | Genome-fragment | NA | 0    |
| 510_vs_k141_1122gene       | 1094  | No | NA | 1 | 0 | Low-quality    | Genome-fragment | NA | 1.14 |
| 512_extracted_k141_101704  | 1094  | No | NA | 0 | 1 | Low-quality    | Genome-fragment | NA | 0.5  |
| 59_extracted_k141_66585    | 1352  | No | NA | 0 | 2 | Not-determined | Genome-fragment | NA | 0    |
| 59_extracted_k141_52967    | 3446  | No | NA | 0 | 5 | Not-determined | Genome-fragment | NA | 0    |
| 59_extracted_k141_6410     | 1435  | No | NA | 0 | 1 | Not-determined | Genome-fragment | NA | 0    |
| 59_extracted_k141_74265    | 4099  | No | NA | 0 | 4 | Not-determined | Genome-fragment | NA | 0    |
| 59_extracted_k141_80246    | 1182  | No | NA | 0 | 2 | Not-determined | Genome-fragment | NA | 0    |
| 59_extracted_k141_59098    | 1030  | No | NA | 0 | 0 | Not-determined | Genome-fragment | NA | 0    |
| 59_extracted_k141_13711    | 3319  | No | NA | 0 | 1 | Not-determined | Genome-fragment | NA | 0    |
| 59_extracted_k141_89291    | 1323  | No | NA | 0 | 1 | Not-determined | Genome-fragment | NA | 0    |
| 59_extracted_k141_2641     | 1480  | No | NA | 1 | 0 | Not-determined | Genome-fragment | NA | 0    |
| 512_vs_k141_50154  full    | 1094  | No | NA | 2 | 0 | Low-quality    | Genome-fragment | NA | 2.8  |
| 59_extracted_k141_33859    | 1187  | No | NA | 0 | 0 | Not-determined | Genome-fragment | NA | 0    |
| 59_extracted_k141_47706    | 1327  | No | NA | 0 | 0 | Not-determined | Genome-fragment | NA | 0    |
| 59_extracted_k141_85602    | 2301  | No | NA | 0 | 1 | Not-determined | Genome-fragment | NA | 0    |
| 58_extracted_k141_55590    | 1094  | No | NA | 0 | 0 | Low-quality    | Genome-fragment | NA | 2.38 |
| 59_extracted_k141_13735    | 1554  | No | NA | 0 | 1 | Not-determined | Genome-fragment | NA | 0    |
| 58_vs_k141_4029  full      | 1094  | No | NA | 0 | 0 | Low-quality    | Genome-fragment | NA | 3.04 |
| 58_vs_k141_180306  full    | 1094  | No | NA | 0 | 1 | Low-quality    | Genome-fragment | NA | 1.99 |
| 517_extracted_k141_94913   | 1095  | No | NA | 0 | 0 | Low-quality    | Genome-fragment | NA | 0.69 |
| 517_vs_k141_51736  ln2gene | 1095  | No | NA | 1 | 0 | Low-quality    | Genome-fragment | NA | 1.85 |
| 59_vs_k141_56398  full     | 1095  | No | NA | 0 | 0 | Low-quality    | Genome-fragment | NA | 1.99 |
| 59_extracted_k141_25316    | 1406  | No | NA | 0 | 1 | Not-determined | Genome-fragment | NA | 0    |
| 59_extracted_k141_32924    | 1528  | No | NA | 0 | 0 | Not-determined | Genome-fragment | NA | 0    |
| 514_vs_k141_51100  full    | 1095  | No | NA | 0 | 0 | Low-quality    | Genome-fragment | NA | 2.02 |
| 59_extracted_k141_10085    | 2405  | No | NA | 0 | 1 | Not-determined | Genome-fragment | NA | 0    |
| 59_extracted_k141_85681    | 1045  | No | NA | 0 | 1 | Not-determined | Genome-fragment | NA | 0    |
| 59_extracted_k141_10116    | 1232  | No | NA | 0 | 3 | Not-determined | Genome-fragment | NA | 0    |
| 59_extracted_k141_74407    | 3092  | No | NA | 0 | 4 | Not-determined | Genome-fragment | NA | 0    |
| 59_extracted_k141_29344    | 1160  | No | NA | 0 | 0 | Not-determined | Genome-fragment | NA | 0    |
| 53_extracted_k141_48901    | 1095  | No | NA | 0 | 0 | Low-quality    | Genome-fragment | NA | 3.12 |
| 53_vs_k141_75860  ln2gene  | 1095  | No | NA | 1 | 0 | Low-quality    | Genome-fragment | NA | 2.78 |
| 59_extracted_k141_55756    | 1507  | No | NA | 0 | 2 | Not-determined | Genome-fragment | NA | 1.83 |
| 55_extracted_k141_38607    | 1095  | No | NA | 0 | 2 | Low-quality    | Genome-fragment | NA | 0    |
| 59_extracted_k141_44594    | 1641  | No | NA | 0 | 0 | Not-determined | Genome-fragment | NA | 0    |
| 59_extracted_k141_47766    | 1108  | No | NA | 0 | 1 | Not-determined | Genome-fragment | NA | 0    |
| 59_extracted_k141_29415    | 1261  | No | NA | 0 | 0 | Not-determined | Genome-fragment | NA | 0    |
| 59_extracted_k141_36980    | 2754  | No | NA | 0 | 1 | Not-determined | Genome-fragment | NA | 0    |
| 55_vs_k141_63688  full     | 1095  | No | NA | 0 | 0 | Low-quality    | Genome-fragment | NA | 2.85 |
| 57_vs_34680  full          | 1095  | No | NA | 2 | 0 | Low-quality    | Genome-fragment | NA | 2.46 |
| 59_extracted_k141_33051    | 1473  | No | NA | 0 | 0 | Not-determined | Genome-fragment | NA | 0    |
| 59_extracted_k141_51061    | 2998  | No | NA | 0 | 0 | Not-determined | Genome-fragment | NA | 0    |
| 516_extracted_120938       | 1095  | No | NA | 2 | 0 | Low-quality    | Genome-fragment | NA | 2.49 |
| 59_extracted_k141_66440    | 1420  | No | NA | 0 | 1 | Not-determined | Genome-fragment | NA | 0    |
| 59_extracted_k141_70503    | 1561  | No | NA | 0 | 0 | Not-determined | Genome-fragment | NA | 0    |
| 512_vs_k141_180863  full   | 1095  | No | NA | 1 | 0 | Low-quality    | Genome-fragment | NA | 2.04 |
| 59_extracted_k141_47843    | 2390  | No | NA | 0 | 0 | Not-determined | Genome-fragment | NA | 0    |
| 59_extracted_k141_66782    | 1131  | No | NA | 0 | 0 | Not-determined | Genome-fragment | NA | 0    |
| 59_extracted_k141_55835    | 1529  | No | NA | 0 | 1 | Not-determined | Genome-fragment | NA | 0    |
| 59_extracted_k141_82136    | 2293  | No | NA | 0 | 0 | Not-determined | Genome-fragment | NA | 0    |
| 515_vs_5851  full          | 1095  | No | NA | 0 | 1 | Low-quality    | Genome-fragment | NA | 0.4  |
| 56_vs_k141_31308  full     | 1095  | No | NA | 0 | 0 | Low-quality    | Genome-fragment | NA | 2.66 |
| 58_extracted_k141_109502   | 1095  | No | NA | 0 | 0 | Low-quality    | Genome-fragment | NA | 0.61 |
| 517_extracted_k141_63822   | 1096  | No | NA | 0 | 0 | Low-quality    | Genome-fragment | NA | 2.1  |
| 59_extracted_k141_89440    | 1524  | No | NA | 0 | 0 | Not-determined | Genome-fragment | NA | 0    |
| 511_extracted_k141_78443   | 1096  | No | NA | 2 | 0 | Low-quality    | Genome-fragment | NA | 3.61 |
| 59_extracted_k141_85864    | 4282  | No | NA | 0 | 0 | Not-determined | Genome-fragment | NA | 0    |
| 511_vs_k141_19836  full    | 1096  | No | NA | 0 | 0 | Low-quality    | Genome-fragment | NA | 1.84 |
| 59_extracted_k141_14006    | 1045  | No | NA | 0 | 1 | Not-determined | Genome-fragment | NA | 0    |
| 59_extracted_k141_89460    | 1507  | No | NA | 0 | 0 | Not-determined | Genome-fragment | NA | 0    |
| 59_extracted_k141_25537    | 1408  | No | NA | 0 | 1 | Not-determined | Genome-fragment | NA | 0    |
| 513_extracted_105258       | 1096  | No | NA | 0 | 0 | Low-quality    | Genome-fragment | NA | 0.69 |
| 59_extracted_k141_64867    | 1053  | No | NA | 0 | 0 | Not-determined | Genome-fragment | NA | 0    |
| 59_extracted_k141_59321    | 2315  | No | NA | 0 | 0 | Not-determined | Genome-fragment | NA | 0    |
| 59_extracted_k141_2837     | 1124  | No | NA | 0 | 0 | Not-determined | Genome-fragment | NA | 0    |
| 59_extracted_k141_89493    | 1836  | No | NA | 0 | 1 | Not-determined | Genome-fragment | NA | 0    |
| 51_vs_k141_60808  ln2gene  | 1096  | No | NA | 0 | 0 | Low-quality    | Genome-fragment | NA | 3.62 |
| 59_extracted_k141_10323    | 8828  | No | NA | 0 | 1 | Not-determined | Genome-fragment | NA | 0    |
| 55_vs_k141_4140  full      | 1096  | No | NA | 0 | 0 | Low-quality    | Genome-fragment | NA | 0.57 |
| 57_extracted_26600         | 1096  | No | NA | 0 | 0 | Low-quality    | Genome-fragment | NA | 0.47 |
| 59_extracted_k141_59331    | 2093  | No | NA | 0 | 2 | Not-determined | Genome-fragment | NA | 0    |
| 59_extracted_k141_37116    | 1134  | No | NA | 0 | 1 | Not-determined | Genome-fragment | NA | 0    |
| 57_vs_123930  full         | 1096  | No | NA | 0 | 0 | Low-quality    | Genome-fragment | NA | 2.68 |
| 59_extracted_k141_89560    | 1148  | No | NA | 0 | 1 | Not-determined | Genome-fragment | NA | 0    |
| 59_extracted_k141_6729     | 1076  | No | NA | 0 | 1 | Not-determined | Genome-fragment | NA | 0    |
| 59_extracted_k141_59366    | 1628  | No | NA | 0 | 1 | Not-determined | Genome-fragment | NA | 0    |
| 59_extracted_k141_40901    | 1896  | No | NA | 0 | 0 | Not-determined | Genome-fragment | NA | 0    |
| 57_vs_77724  ln2gene       | 1096  | No | NA | 1 | 0 | Low-quality    | Genome-fragment | NA | 2.92 |
| 59_extracted_k141_18227    | 11201 | No | NA | 0 | 5 | Not-determined | Genome-fragment | NA | 0    |
| 59_extracted_k141_59599    | 1380  | No | NA | 0 | 0 | Not-determined | Genome-fragment | NA | 0    |
| 516_extracted_10465        | 1096  | No | NA | 0 | 1 | Low-quality    | Genome-fragment | NA | 0.82 |
| 59_extracted_k141_85975    | 1604  | No | NA | 0 | 0 | Not-determined | Genome-fragment | NA | 0    |
| 59_extracted_k141_59555    | 1229  | No | NA | 0 | 0 | Not-determined | Genome-fragment | NA | 0    |
| 510_extracted_80304        | 1096  | No | NA | 0 | 0 | Low-quality    | Genome-fragment | NA | 0.57 |
| 59_extracted_k141_89596    | 4963  | No | NA | 0 | 2 | Not-determined | Genome-fragment | NA | 0    |
| 59_extracted_k141_2932     | 1163  | No | NA | 0 | 1 | Not-determined | Genome-fragment | NA | 0    |
| 59_extracted_k141_74514    | 4153  | No | NA | 0 | 2 | Not-determined | Genome-fragment | NA | 0    |
| 510_vs_4693  full          | 1096  | No | NA | 0 | 0 | Low-quality    | Genome-fragment | NA | 2.48 |
| 59_extracted_k141_25637    | 1166  | No | NA | 0 | 2 | Not-determined | Genome-fragment | NA | 0    |
| 59_extracted_k141_44783    | 1613  | No | NA | 0 | 0 | Not-determined | Genome-fragment | NA | 0    |
| 512_extracted_k141_80715   | 1096  | No | NA | 0 | 0 | Low-quality    | Genome-fragment | NA | 1.91 |
| 59_extracted_k141_33323    | 7178  | No | NA | 0 | 3 | Not-determined | Genome-fragment | NA | 0    |
| 59_extracted_k141_59423    | 1141  | No | NA | 0 | 0 | Not-determined | Genome-fragment | NA | 0    |
| 59_extracted_k141_10346    | 1321  | No | NA | 0 | 1 | Not-determined | Genome-fragment | NA | 0    |
| 512_extracted_k141_11943   | 1096  | No | NA | 1 | 0 | Low-quality    | Genome-fragment | NA | 1.54 |
| 512_extracted_k141_180807  | 1096  | No | NA | 0 | 0 | Low-quality    | Genome-fragment | NA | 3.43 |
| 59_extracted_k141_18346    | 2750  | No | NA | 0 | 0 | Not-determined | Genome-fragment | NA | 0    |
| 59_extracted_k141_86070    | 1129  | No | NA | 0 | 1 | Not-determined | Genome-fragment | NA | 0    |
| 59_extracted_k141_51350    | 2103  | No | NA | 0 | 0 | Not-determined | Genome-fragment | NA | 0    |
| 59_extracted_k141_82302    | 1008  | No | NA | 0 | 1 | Not-determined | Genome-fragment | NA | 0    |
| 59_extracted_k141_66986    | 1477  | No | NA | 0 | 1 | Not-determined | Genome-fragment | NA | 0    |
| 59_extracted_k141_82314    | 1602  | No | NA | 0 | 0 | Not-determined | Genome-fragment | NA | 0    |
| 59_extracted_k141_82326    | 1000  | No | NA | 0 | 0 | Not-determined | Genome-fragment | NA | 0    |
| 515_extracted_61748        | 1096  | No | NA | 0 | 0 | Low-quality    | Genome-fragment | NA | 3.62 |
| 56_vs_k141_44388  full     | 1096  | No | NA | 2 | 0 | Low-quality    | Genome-fragment | NA | 1.73 |
| 59_extracted_k141_56109    | 1038  | No | NA | 0 | 0 | Not-determined | Genome-fragment | NA | 0    |
| 59_extracted_k141_67031    | 1050  | No | NA | 0 | 0 | Not-determined | Genome-fragment | NA | 0    |
| 58_extracted_k141_168335   | 1096  | No | NA | 0 | 0 | Low-quality    | Genome-fragment | NA | 1.67 |
| 59_extracted_k141_70768    | 1091  | No | NA | 0 | 0 | Not-determined | Genome-fragment | NA | 0    |
| 58_vs_k141_17888  ln2gene  | 1096  | No | NA | 0 | 0 | Low-quality    | Genome-fragment | NA | 2.89 |
| 59_extracted_k141_44893    | 1038  | No | NA | 0 | 1 | Not-determined | Genome-fragment | NA | 0    |
| 59_extracted_k141_74678    | 1237  | No | NA | 0 | 1 | Not-determined | Genome-fragment | NA | 0    |
| 59_vs_k141_11572  full     | 1097  | No | NA | 2 | 0 | Low-quality    | Genome-fragment | NA | 2.34 |
| 59_extracted_k141_48204    | 1048  | No | NA | 0 | 0 | Not-determined | Genome-fragment | NA | 0    |
| 59_extracted_k141_25827    | 2303  | No | NA | 0 | 1 | Not-determined | Genome-fragment | NA | 0    |
| 59_vs_k141_63329  full     | 1097  | No | NA | 1 | 0 | Low-quality    | Genome-fragment | NA | 3    |
| 59_extracted_k141_10606    | 1511  | No | NA | 0 | 0 | Not-determined | Genome-fragment | NA | 0    |
| 59_extracted_k141_67104    | 2332  | No | NA | 0 | 0 | Not-determined | Genome-fragment | NA | 0    |
| 59_extracted_k141_74734    | 1311  | No | NA | 0 | 2 | Not-determined | Genome-fragment | NA | 0    |
| 59_extracted_k141_18510    | 1223  | No | NA | 0 | 1 | Not-determined | Genome-fragment | NA | 0    |
| 59_extracted_k141_78266    | 1660  | No | NA | 0 | 1 | Not-determined | Genome-fragment | NA | 0    |
| 59_extracted_k141_37419    | 1079  | No | NA | 0 | 0 | Not-determined | Genome-fragment | NA | 0    |
| 513_extracted_108627       | 1097  | No | NA | 0 | 2 | Low-quality    | Genome-fragment | NA | 0.11 |
| 59_extracted_k141_25902    | 1332  | No | NA | 0 | 0 | Not-determined | Genome-fragment | NA | 0    |
| 59_extracted_k141_14135    | 1011  | No | NA | 0 | 0 | Not-determined | Genome-fragment | NA | 0    |
| 59_extracted_k141_48248    | 1441  | No | NA | 0 | 2 | Not-determined | Genome-fragment | NA | 2.05 |
| 51_extracted_k141_112605   | 1097  | No | NA | 0 | 1 | Low-quality    | Genome-fragment | NA | 0.67 |
| 51_vs_k141_128139  full    | 1097  | No | NA | 0 | 3 | Low-quality    | Genome-fragment | NA | 0    |
| 59_extracted_k141_89883    | 1250  | No | NA | 0 | 2 | Not-determined | Genome-fragment | NA | 1.37 |
| 51_vs_k141_61111  full     | 1097  | No | NA | 0 | 1 | Low-quality    | Genome-fragment | NA | 1.98 |
| 59_extracted_k141_56230    | 3090  | No | NA | 0 | 2 | Not-determined | Genome-fragment | NA | 0    |
| 51_vs_k141_62162  full     | 1097  | No | NA | 0 | 1 | Low-quality    | Genome-fragment | NA | 0.47 |
| 59_extracted_k141_45037    | 1857  | No | NA | 0 | 0 | Not-determined | Genome-fragment | NA | 2.72 |
| 59_extracted_k141_29952    | 1036  | No | NA | 0 | 0 | Not-determined | Genome-fragment | NA | 0    |
| 51_vs_k141_111676  full    | 1097  | No | NA | 0 | 0 | Low-quality    | Genome-fragment | NA | 0.67 |
| 53_extracted_k141_44113    | 1097  | No | NA | 1 | 0 | Low-quality    | Genome-fragment | NA | 0    |
| 59_extracted_k141_70957    | 1486  | No | NA | 0 | 1 | Not-determined | Genome-fragment | NA | 0    |
| 59_extracted_k141_25973    | 1010  | No | NA | 0 | 0 | Not-determined | Genome-fragment | NA | 0    |
| 59_extracted_k141_41244    | 1260  | No | NA | 0 | 1 | Not-determined | Genome-fragment | NA | 0    |
| 59_extracted_k141          |       |    |    |   |   |                |                 |    |      |



|                               |        |    |    |    |   |                |                 |    |       |
|-------------------------------|--------|----|----|----|---|----------------|-----------------|----|-------|
| 59_extracted_k141_14345       | 4486   | No | NA | 0  | 4 | Not-determined | Genome-fragment | NA | 0     |
| 59_extracted_k141_20226       | 4981   | No | NA | 0  | 7 | Not-determined | Genome-fragment | NA | 0     |
| 58_vs_k141_23594  full        | 1097   | No | NA | 0  | 0 | Low-quality    | Genome-fragment | NA | 0.7   |
| 59_extracted_k141_30228       | 1207   | No | NA | 0  | 1 | Not-determined | Genome-fragment | NA | 0     |
| 58_vs_k141_50893  full        | 1097   | No | NA | 1  | 0 | Low-quality    | Genome-fragment | NA | 1.72  |
| 517_extracted_k141_84151      | 1098   | No | NA | 0  | 1 | Low-quality    | Genome-fragment | NA | 1.3   |
| 59_extracted_k141_3412        | 1411   | No | NA | 0  | 1 | Not-determined | Genome-fragment | NA | 0     |
| 59_extracted_k141_78642       | 1126   | No | NA | 0  | 0 | Not-determined | Genome-fragment | NA | 0     |
| 59_extracted_k141_33829       | 1031   | No | NA | 0  | 0 | Not-determined | Genome-fragment | NA | 0     |
| 59_extracted_k141_56487       | 1288   | No | NA | 0  | 2 | Not-determined | Genome-fragment | NA | 0     |
| 59_extracted_k141_56492       | 1284   | No | NA | 0  | 1 | Not-determined | Genome-fragment | NA | 0     |
| 59_extracted_k141_45370       | 2473   | No | NA | 0  | 2 | Not-determined | Genome-fragment | NA | 0     |
| 517_extracted_k141_102256     | 1098   | No | NA | 0  | 0 | Low-quality    | Genome-fragment | NA | 1.17  |
| 59_extracted_k141_67438       | 2000   | No | NA | 0  | 1 | Not-determined | Genome-fragment | NA | 0     |
| 59_extracted_k141_34435       | 1002   | No | NA | 0  | 1 | Not-determined | Genome-fragment | NA | 0     |
| 59_extracted_k141_67454       | 1503   | No | NA | 0  | 0 | Not-determined | Genome-fragment | NA | 0     |
| 59_extracted_k141_22480       | 1092   | No | NA | 0  | 1 | Not-determined | Genome-fragment | NA | 0     |
| 59_extracted_k141_86490       | 1150   | No | NA | 0  | 1 | Not-determined | Genome-fragment | NA | 0     |
| 59_extracted_k141_90195       | 1259   | No | NA | 0  | 0 | Not-determined | Genome-fragment | NA | 0     |
| 59_extracted_k141_67476       | 1634   | No | NA | 0  | 0 | Not-determined | Genome-fragment | NA | 0     |
| 514_vs_k141_105888  H2genome  | 1098   | No | NA | 0  | 0 | Low-quality    | Genome-fragment | NA | 2.3   |
| 59_extracted_k141_86527       | 1098   | No | NA | 1  | 0 | Low-quality    | Genome-fragment | NA | 1.2   |
| 51_vs_k141_28261  full        | 1035   | No | NA | 0  | 0 | Not-determined | Genome-fragment | NA | 0     |
| 59_extracted_k141_86527       | 1098   | No | NA | 0  | 0 | Low-quality    | Genome-fragment | NA | 3.28  |
| 51_vs_k141_145089  full       | 1098   | No | NA | 1  | 0 | Low-quality    | Genome-fragment | NA | 2.54  |
| 53_vs_k141_39268  full        | 1098   | No | NA | 1  | 0 | Low-quality    | Genome-fragment | NA | 1.75  |
| 59_extracted_k141_67530       | 11239  | No | NA | 0  | 1 | Not-determined | Genome-fragment | NA | 0     |
| 59_extracted_k141_51656       | 12872  | No | NA | 12 | 0 | Complete       | High-quality    | NA | 100   |
| 59_extracted_k141_75235       | 1659   | No | NA | 0  | 1 | Not-determined | Genome-fragment | NA | 0     |
| 59_extracted_k141_56596       | 1883   | No | NA | 0  | 1 | Not-determined | Genome-fragment | NA | 0     |
| 55_extracted_k141_121134      | 1098   | No | NA | 1  | 0 | Low-quality    | Genome-fragment | NA | 2.94  |
| 59_extracted_k141_56605       | 1353   | No | NA | 0  | 0 | Not-determined | Genome-fragment | NA | 0     |
| 59_extracted_k141_86572       | 3424   | No | NA | 0  | 2 | Not-determined | Genome-fragment | NA | 0     |
| 59_extracted_k141_137369      | 1098   | No | NA | 0  | 0 | Low-quality    | Genome-fragment | NA | 0.36  |
| 57_extracted_127051           | 1098   | No | NA | 1  | 0 | Low-quality    | Genome-fragment | NA | 2.39  |
| 59_extracted_k141_22636       | 2174   | No | NA | 0  | 0 | Not-determined | Genome-fragment | NA | 0     |
| 59_extracted_k141_3532        | 1285   | No | NA | 0  | 0 | Not-determined | Genome-fragment | NA | 0     |
| 59_extracted_k141_56633       | 3319   | No | NA | 0  | 1 | Not-determined | Genome-fragment | NA | 0     |
| 59_extracted_k141_60099       | 1110   | No | NA | 0  | 0 | Not-determined | Genome-fragment | NA | 0     |
| 516_extracted_136437          | 1098   | No | NA | 0  | 1 | Low-quality    | Genome-fragment | NA | 2.75  |
| 59_extracted_k141_48578       | 1502   | No | NA | 0  | 0 | Not-determined | Genome-fragment | NA | 0     |
| 59_extracted_k141_56645       | 1484   | No | NA | 0  | 0 | Not-determined | Genome-fragment | NA | 0     |
| 59_extracted_k141_11138       | 3105   | No | NA | 0  | 2 | Not-determined | Genome-fragment | NA | 0     |
| 512_vs_k141_150035  full      | 1098   | No | NA | 0  | 0 | Low-quality    | Genome-fragment | NA | 4.41  |
| 512_vs_k141_57001  full       | 1098   | No | NA | 0  | 0 | Low-quality    | Genome-fragment | NA | 3.06  |
| 59_extracted_k141_60119       | 1375   | No | NA | 0  | 0 | Low-quality    | Genome-fragment | NA | 0     |
| 59_extracted_k141_56671       | 1006   | No | NA | 0  | 1 | Not-determined | Genome-fragment | NA | 0     |
| 59_extracted_k141_35375       | 4004   | No | NA | 0  | 2 | Not-determined | Genome-fragment | NA | 0     |
| 512_vs_k141_1412361  H2genome | 1098   | No | NA | 0  | 0 | Low-quality    | Genome-fragment | NA | 2.63  |
| 58_extracted_k141_27949       | 1098   | No | NA | 0  | 0 | Low-quality    | Genome-fragment | NA | 1.09  |
| 58_vs_k141_84928  full        | 1098   | No | NA | 0  | 0 | Low-quality    | Genome-fragment | NA | 1.96  |
| 59_extracted_k141_48607       | 1272   | No | NA | 0  | 0 | Not-determined | Genome-fragment | NA | 0     |
| 59_extracted_k141_78974       | 1142   | No | NA | 0  | 0 | Not-determined | Genome-fragment | NA | 0     |
| 59_extracted_k141_71609       | 1107   | No | NA | 0  | 0 | Not-determined | Genome-fragment | NA | 0     |
| 59_extracted_k141_75363       | 12595  | No | NA | 7  | 1 | Medium-quality | Genome-fragment | NA | 59.41 |
| 517_vs_k141_36429  H2genome   | 1099   | No | NA | 0  | 0 | Low-quality    | Genome-fragment | NA | 19.85 |
| 59_vs_k141_20745  full        | 1099   | No | NA | 0  | 0 | Low-quality    | Genome-fragment | NA | 1.03  |
| 511_vs_k141_102790  full      | 1099   | No | NA | 0  | 0 | Low-quality    | Genome-fragment | NA | 1.33  |
| 59_extracted_k141_56791       | 1364   | No | NA | 0  | 1 | Not-determined | Genome-fragment | NA | 0     |
| 59_extracted_k141_83808       | 1046   | No | NA | 0  | 0 | Not-determined | Genome-fragment | NA | 0     |
| 59_extracted_k141_11316       | 1025   | No | NA | 0  | 0 | Not-determined | Genome-fragment | NA | 0     |
| 59_extracted_k141_2716        | 1551   | No | NA | 0  | 1 | Not-determined | Genome-fragment | NA | 0     |
| 53_extracted_k141_60395       | 1099   | No | NA | 0  | 0 | Low-quality    | Genome-fragment | NA | 2.17  |
| 55_vs_k141_30480  full        | 1099   | No | NA | 1  | 0 | Low-quality    | Genome-fragment | NA | 2.42  |
| 55_vs_k141_18084  full        | 1099   | No | NA | 0  | 0 | Low-quality    | Genome-fragment | NA | 1.47  |
| 59_extracted_k141_86860       | 2634   | No | NA | 0  | 7 | Not-determined | Genome-fragment | NA | 0     |
| 57_vs_1637  full              | 1099   | No | NA | 1  | 0 | Low-quality    | Genome-fragment | NA | 1.22  |
| 59_extracted_k141_60357       | 1184   | No | NA | 0  | 2 | Not-determined | Genome-fragment | NA | 0     |
| 59_extracted_k141_75457       | 1098   | No | NA | 0  | 1 | Not-determined | Genome-fragment | NA | 0     |
| 59_extracted_k141_79101       | 1043   | No | NA | 0  | 0 | Not-determined | Genome-fragment | NA | 0     |
| 57_vs_112865  full            | 1099   | No | NA | 1  | 0 | Low-quality    | Genome-fragment | NA | 2.8   |
| 59_extracted_k141_83928       | 1209   | No | NA | 0  | 2 | Not-determined | Genome-fragment | NA | 0     |
| 516_extracted_122732          | 1099   | No | NA | 1  | 0 | Low-quality    | Genome-fragment | NA | 1.73  |
| 516_extracted_129711          | 1099   | No | NA | 0  | 0 | Low-quality    | Genome-fragment | NA | 4.31  |
| 59_extracted_k141_48824       | 3182   | No | NA | 0  | 0 | Not-determined | Genome-fragment | NA | 0     |
| 59_extracted_k141_71753       | 1169   | No | NA | 0  | 1 | Not-determined | Genome-fragment | NA | 0     |
| 512_vs_k141_65584  full       | 1099   | No | NA | 0  | 0 | Low-quality    | Genome-fragment | NA | 0.95  |
| 58_extracted_k141_19081       | 1099   | No | NA | 0  | 1 | Low-quality    | Genome-fragment | NA | 2.12  |
| 59_extracted_k141_14958       | 1097   | No | NA | 0  | 2 | Not-determined | Genome-fragment | NA | 0     |
| 59_extracted_k141_83016       | 2056   | No | NA | 0  | 0 | Not-determined | Genome-fragment | NA | 0     |
| 58_vs_k141_147359  full       | 1099   | No | NA | 0  | 0 | Low-quality    | Genome-fragment | NA | 0.6   |
| 59_extracted_k141_75608       | 1713   | No | NA | 0  | 1 | Not-determined | Genome-fragment | NA | 0     |
| 59_extracted_k141_90548       | 3857   | No | NA | 0  | 2 | Not-determined | Genome-fragment | NA | 0     |
| 59_extracted_k141_67910       | 1406   | No | NA | 0  | 0 | Not-determined | Genome-fragment | NA | 0     |
| 514_vs_k141_29173  full       | 1100   | No | NA | 0  | 0 | Low-quality    | Genome-fragment | NA | 0.67  |
| 59_extracted_k141_83062       | 1135   | No | NA | 0  | 1 | Not-determined | Genome-fragment | NA | 0     |
| 511_extracted_k141_156811     | 1100   | No | NA | 1  | 0 | Low-quality    | Genome-fragment | NA | 2.36  |
| 59_extracted_k141_79269       | 3026   | No | NA | 0  | 2 | Not-determined | Genome-fragment | NA | 0     |
| 51_extracted_k141_39224       | 1100   | No | NA | 0  | 0 | Low-quality    | Genome-fragment | NA | 1.81  |
| 53_extracted_k141_76931       | 1100   | No | NA | 0  | 0 | Low-quality    | Genome-fragment | NA | 1.24  |
| 59_extracted_k141_15012       | 32097  | No | NA | 30 | 0 | High-quality   | High-quality    | NA | 99.61 |
| 53_vs_k141_38605  full        | 1100   | No | NA | 0  | 0 | Low-quality    | Genome-fragment | NA | 0.77  |
| 55_vs_k141_24718  full        | 1100   | No | NA | 1  | 0 | Low-quality    | Genome-fragment | NA | 0.67  |
| 59_extracted_k141_64018       | 1220   | No | NA | 0  | 0 | Not-determined | Genome-fragment | NA | 0     |
| 55_vs_k141_13116  full        | 1100   | No | NA | 0  | 0 | Low-quality    | Genome-fragment | NA | 1.7   |
| 59_extracted_k141_75753       | 1126   | No | NA | 0  | 0 | Not-determined | Genome-fragment | NA | 0     |
| 55_vs_k141_32349  full        | 1100   | No | NA | 2  | 0 | Low-quality    | Genome-fragment | NA | 2.56  |
| 57_vs_98994  full             | 1100   | No | NA | 1  | 0 | Low-quality    | Genome-fragment | NA | 2.7   |
| 59_extracted_k141_69095       | 2518   | No | NA | 2  | 2 | Not-determined | Genome-fragment | NA | 0     |
| 59_extracted_k141_68100       | 7276   | No | NA | 0  | 5 | Not-determined | Genome-fragment | NA | 0     |
| 59_extracted_k141_83140       | 1466   | No | NA | 0  | 0 | Not-determined | Genome-fragment | NA | 0     |
| 57_vs_99518  full             | 1100   | No | NA | 0  | 1 | Low-quality    | Genome-fragment | NA | 2.11  |
| 516_extracted_19198           | 1100   | No | NA | 0  | 0 | Low-quality    | Genome-fragment | NA | 2.54  |
| 516_extracted_121252          | 1100   | No | NA | 0  | 1 | Low-quality    | Genome-fragment | NA | 0.3   |
| 510_vs_48301  full            | 1100   | No | NA | 0  | 0 | Low-quality    | Genome-fragment | NA | 1.37  |
| 59_extracted_k141_64183       | 1012   | No | NA | 0  | 0 | Not-determined | Genome-fragment | NA | 0     |
| 59_extracted_k141_83236       | 1073   | No | NA | 0  | 0 | Not-determined | Genome-fragment | NA | 0     |
| 59_extracted_k141_79553       | 1274   | No | NA | 0  | 1 | Not-determined | Genome-fragment | NA | 0     |
| 58_extracted_k141_35395       | 1100   | No | NA | 0  | 0 | Low-quality    | Genome-fragment | NA | 2.35  |
| 59_extracted_k141_64246       | 1689   | No | NA | 0  | 1 | Not-determined | Genome-fragment | NA | 0     |
| 59_extracted_k141_83314       | 1133   | No | NA | 0  | 1 | Not-determined | Genome-fragment | NA | 0     |
| 59_extracted_k141_64257       | 1130   | No | NA | 0  | 1 | Not-determined | Genome-fragment | NA | 0     |
| 59_extracted_k141_83353       | 1501   | No | NA | 0  | 0 | Not-determined | Genome-fragment | NA | 0     |
| 59_extracted_k141_49239       | 1459   | No | NA | 0  | 1 | Not-determined | Genome-fragment | NA | 0     |
| 58_vs_k141_102405  H2genome   | 1100   | No | NA | 0  | 0 | Low-quality    | Genome-fragment | NA | 0.71  |
| 59_extracted_k141_90808       | 1399   | No | NA | 0  | 1 | Not-determined | Genome-fragment | NA | 0     |
| 59_extracted_k141_52611       | 1424   | No | NA | 0  | 1 | Not-determined | Genome-fragment | NA | 0     |
| 59_extracted_k141_90839       | 1011   | No | NA | 0  | 0 | Not-determined | Genome-fragment | NA | 0     |
| 59_extracted_k141_53629       | 2157   | No | NA | 0  | 1 | Not-determined | Genome-fragment | NA | 0     |
| 517_extracted_k141_50502      | 1101   | No | NA | 2  | 0 | Low-quality    | Genome-fragment | NA | 2.87  |
| 59_extracted_k141_52715       | 1152   | No | NA | 0  | 1 | Not-determined | Genome-fragment | NA | 0     |
| 59_extracted_k141_52828       | 2215   | No | NA | 0  | 0 | Not-determined | Genome-fragment | NA | 0     |
| 517_vs_k141_177075  full      | 1101   | No | NA | 2  | 0 | Low-quality    | Genome-fragment | NA | 2.8   |
| 59_extracted_k141_52880       | 1131   | No | NA | 0  | 1 | Not-determined | Genome-fragment | NA | 0     |
| 59_extracted_k141_52938       | 1147   | No | NA | 0  | 0 | Not-determined | Genome-fragment | NA | 0     |
| 59_extracted_k141_90847       | 148940 | No | NA | 39 | 5 | Complete       | High-quality    | NA | 100   |
| 59_extracted_k141_53030       | 1299   | No | NA | 0  | 0 | Not-determined | Genome-fragment | NA | 0     |
| 59_extracted_k141_90852       | 5449   | No | NA | 0  | 0 | Complete       | High-quality    | NA | 100   |
| 514_extracted_k141_49984      | 1101   | No | NA | 0  | 0 | Low-quality    | Genome-fragment | NA | 0.12  |
| 59_extracted_k141_90856       | 38132  | No | NA | 36 | 0 | Complete       | High-quality    | NA | 100   |
| 59_extracted_k141_90866       | 9389   | No | NA | 6  | 0 | Complete       | High-quality    | NA | 100   |
| 59_extracted_k141_90871       | 36948  | No | NA | 26 | 0 | Complete       | High-quality    | NA | 100   |
| 59_vs_k141_45812  full        | 36339  | No | NA | 13 | 2 | Medium-quality | Genome-fragment | NA | 69.64 |
| 59_vs_k141_49948  full        | 6495   | No | NA | 0  | 0 | Not-determined | Genome-fragment | NA | 100   |
| 59_vs_k141_88286  full        | 46213  | No | NA | 12 | 1 | High-quality   | High-quality    | NA | 100   |
| 59_vs_k141_50439  full        | 56327  | No | NA | 21 | 1 | High-quality   | High-quality    | NA | 100   |
| 51_vs_k141_143883  full       | 1101   | No | NA | 1  | 0 | Low-quality    | Genome-fragment | NA | 1.77  |
| 59_vs_k141_5676  full         | 34189  | No | NA | 17 | 0 | Complete       | High-quality    | NA | 100   |
| 59_vs_k141_66877  full        | 36296  | No | NA | 14 | 0 | High-quality   | High-quality    | NA | 94.24 |
| 59_vs_k141_75050  full        | 32777  | No | NA | 14 | 2 | High-quality   | High-quality    | NA | 100   |
| 59_vs_k141_84241  full        | 54788  | No | NA | 15 | 4 | High-quality   | High-quality    | NA | 97.96 |
| 59_vs_k141_90846  full        | 38274  | No | NA | 21 | 1 | High-quality   | High-quality    | NA | 93.75 |
| 59_vs_k141_90848  full        | 42668  | No | NA | 19 | 1 | Medium-quality | Genome-fragment | NA | 79.27 |
| 59_vs_k141_90849  full        | 40590  | No | NA |    |   |                |                 |    |       |



|                           |       |    |    |    |                |                 |       |   |
|---------------------------|-------|----|----|----|----------------|-----------------|-------|---|
| 51_vs_k141_137903  full   | 1102  | NA | 2  | 0  | Low-quality    | Genome-fragment | 1.82  | 0 |
| 59_vs_k141_3419  full     | 2271  | NA | 1  | 0  | Not-determined | Genome-fragment | NA    | 0 |
| 51_vs_k141_125730  H2gene | 1102  | NA | 1  | 0  | Low-quality    | Genome-fragment | 2.47  | 0 |
| 59_vs_k141_22811  full    | 2443  | NA | 0  | 1  | Not-determined | Genome-fragment | NA    | 0 |
| 57_extracted_61465        | 1102  | NA | 0  | 0  | Low-quality    | Genome-fragment | 2.04  | 0 |
| 59_vs_k141_15247  full    | 4848  | NA | 0  | 3  | Not-determined | Genome-fragment | NA    | 0 |
| 59_vs_k141_18991  full    | 25513 | NA | 0  | 16 | Not-determined | Genome-fragment | NA    | 0 |
| 59_vs_k141_7655  full     | 1540  | NA | 0  | 0  | Not-determined | Genome-fragment | NA    | 0 |
| 59_vs_k141_12823  full    | 1298  | NA | 0  | 0  | Not-determined | Genome-fragment | NA    | 0 |
| 59_vs_k141_83457  full    | 1517  | NA | 0  | 0  | Not-determined | Genome-fragment | NA    | 0 |
| 59_vs_k141_64510  full    | 1350  | NA | 0  | 0  | Not-determined | Genome-fragment | NA    | 0 |
| 59_vs_k141_22825  full    | 2802  | NA | 0  | 0  | Not-determined | Genome-fragment | NA    | 0 |
| 59_vs_k141_68270  full    | 1498  | NA | 0  | 1  | Not-determined | Genome-fragment | NA    | 0 |
| 59_vs_k141_60696  full    | 2402  | NA | 0  | 1  | Not-determined | Genome-fragment | NA    | 0 |
| 59_vs_k141_81469  full    | 3457  | NA | 0  | 3  | Not-determined | Genome-fragment | NA    | 0 |
| 516_extracted_66258       | 1102  | NA | 0  | 0  | Low-quality    | Genome-fragment | 3.52  | 0 |
| 510_vs_48234  full        | 1102  | NA | 0  | 1  | Low-quality    | Genome-fragment | 0.74  | 0 |
| 54_extracted_22682        | 1102  | NA | 2  | 0  | Low-quality    | Genome-fragment | 2.99  | 0 |
| 59_vs_k141_971  full      | 2246  | NA | 0  | 0  | Not-determined | Genome-fragment | NA    | 0 |
| 58_extracted_k141_93720   | 1102  | NA | 0  | 2  | Low-quality    | Genome-fragment | 3.63  | 0 |
| 517_extracted_k141_134380 | 1103  | NA | 0  | 1  | Low-quality    | Genome-fragment | 0.49  | 0 |
| 511_vs_k141_30990  full   | 1103  | NA | 0  | 0  | Low-quality    | Genome-fragment | 1.51  | 0 |
| 59_vs_k141_19064  full    | 4826  | NA | 0  | 3  | Not-determined | Genome-fragment | NA    | 0 |
| 59_vs_k141_79697  full    | 1411  | NA | 0  | 0  | Not-determined | Genome-fragment | NA    | 0 |
| 59_vs_k141_11522  full    | 2557  | NA | 0  | 3  | Not-determined | Genome-fragment | NA    | 0 |
| 511_vs_k141_4988  H2gene  | 1103  | NA | 0  | 0  | Low-quality    | Genome-fragment | 2.45  | 0 |
| 513_vs_21737  full        | 1103  | NA | 0  | 1  | Low-quality    | Genome-fragment | 2.51  | 0 |
| 51_extracted_k141_20215   | 1103  | NA | 1  | 0  | Low-quality    | Genome-fragment | 2.17  | 0 |
| 51_vs_k141_83346  H2gene  | 1103  | NA | 0  | 0  | Low-quality    | Genome-fragment | 2.19  | 0 |
| 59_vs_k141_68298  full    | 1833  | NA | 0  | 2  | Not-determined | Genome-fragment | NA    | 0 |
| 53_vs_k141_82950  H2gene  | 1103  | NA | 1  | 0  | Low-quality    | Genome-fragment | 0.93  | 0 |
| 59_vs_k141_85576  full    | 2493  | NA | 0  | 2  | Not-determined | Genome-fragment | NA    | 0 |
| 55_vs_k141_128832  full   | 1103  | NA | 2  | 0  | Low-quality    | Genome-fragment | 1.34  | 0 |
| 59_vs_k141_34333  full    | 1059  | NA | 0  | 1  | Not-determined | Genome-fragment | NA    | 0 |
| 55_vs_k141_39374  H2gene  | 1103  | NA | 1  | 0  | Low-quality    | Genome-fragment | 2.09  | 0 |
| 57_extracted_13271        | 1103  | NA | 0  | 0  | Low-quality    | Genome-fragment | 2.91  | 0 |
| 59_vs_k141_30556  full    | 3672  | NA | 0  | 3  | Not-determined | Genome-fragment | NA    | 0 |
| 516_vs_39452  full        | 1103  | NA | 0  | 0  | Low-quality    | Genome-fragment | 1.89  | 0 |
| 59_vs_k141_11606  full    | 1342  | NA | 0  | 0  | Not-determined | Genome-fragment | NA    | 0 |
| 510_extracted_34872       | 1103  | NA | 0  | 1  | Low-quality    | Genome-fragment | 0.7   | 0 |
| 59_vs_k141_34388  full    | 1016  | NA | 0  | 0  | Not-determined | Genome-fragment | NA    | 0 |
| 510_vs_51143  full        | 1103  | NA | 0  | 0  | Low-quality    | Genome-fragment | 1.58  | 0 |
| 59_vs_k141_45651  full    | 1568  | NA | 0  | 0  | Not-determined | Genome-fragment | NA    | 0 |
| 512_vs_k141_58178  full   | 1103  | NA | 0  | 0  | Low-quality    | Genome-fragment | 0.64  | 0 |
| 59_vs_k141_57003  full    | 3482  | NA | 0  | 2  | Not-determined | Genome-fragment | NA    | 0 |
| 59_vs_k141_4041  full     | 4732  | NA | 0  | 2  | Not-determined | Genome-fragment | NA    | 0 |
| 59_vs_k141_49380  full    | 2405  | NA | 0  | 0  | Not-determined | Genome-fragment | NA    | 0 |
| 59_vs_k141_68371  full    | 1104  | NA | 0  | 1  | Not-determined | Genome-fragment | NA    | 0 |
| 59_vs_k141_63574  full    | 3376  | NA | 0  | 1  | Not-determined | Genome-fragment | NA    | 0 |
| 52_vs_k141_2873  H2gene   | 1103  | NA | 1  | 0  | Low-quality    | Genome-fragment | 2.65  | 0 |
| 56_extracted_k141_38690   | 1103  | NA | 0  | 3  | Low-quality    | Genome-fragment | 0.31  | 0 |
| 56_vs_k141_61217  full    | 1103  | NA | 0  | 1  | Low-quality    | Genome-fragment | 0.58  | 0 |
| 59_vs_k141_34461  full    | 1172  | NA | 0  | 1  | Not-determined | Genome-fragment | NA    | 0 |
| 59_vs_k141_3221  full     | 2056  | NA | 0  | 0  | Not-determined | Genome-fragment | NA    | 0 |
| 58_vs_k141_35946  full    | 1103  | NA | 0  | 0  | Low-quality    | Genome-fragment | 1.64  | 0 |
| 58_vs_k141_3882  full     | 1103  | NA | 0  | 0  | Low-quality    | Genome-fragment | 2.04  | 0 |
| 517_extracted_k141_62101  | 1104  | NA | 0  | 0  | Low-quality    | Genome-fragment | 0.19  | 0 |
| 59_vs_k141_38192  full    | 2521  | NA | 0  | 1  | Not-determined | Genome-fragment | NA    | 0 |
| 59_vs_k141_41933  full    | 1628  | NA | 0  | 0  | Not-determined | Genome-fragment | NA    | 0 |
| 59_vs_k141_68415  full    | 1387  | NA | 0  | 0  | Not-determined | Genome-fragment | NA    | 0 |
| 517_extracted_k141_87296  | 1104  | NA | 0  | 0  | Low-quality    | Genome-fragment | 0.18  | 0 |
| 59_vs_k141_38188  full    | 1854  | NA | 0  | 1  | Not-determined | Genome-fragment | NA    | 0 |
| 59_vs_k141_87452  full    | 9268  | NA | 0  | 3  | Not-determined | Genome-fragment | NA    | 0 |
| 59_vs_k141_44671  full    | 1260  | NA | 0  | 2  | Not-determined | Genome-fragment | NA    | 0 |
| 59_extracted_k141_26468   | 1104  | NA | 0  | 0  | Low-quality    | Genome-fragment | 2.02  | 0 |
| 59_vs_k141_57044  full    | 4309  | NA | 0  | 0  | Not-determined | Genome-fragment | NA    | 0 |
| 59_extracted_k141_37590   | 1104  | NA | 0  | 0  | Low-quality    | Genome-fragment | 1.1   | 0 |
| 59_vs_k141_3731  full     | 1104  | NA | 0  | 0  | Low-quality    | Genome-fragment | 2.61  | 0 |
| 59_vs_k141_4797  H2gene   | 1104  | NA | 0  | 0  | Low-quality    | Genome-fragment | 2.54  | 0 |
| 59_vs_k141_57053  full    | 1275  | NA | 0  | 0  | Not-determined | Genome-fragment | NA    | 0 |
| 511_extracted_k141_64746  | 1104  | NA | 1  | 0  | Low-quality    | Genome-fragment | 2.66  | 0 |
| 513_vs_140372  full       | 1104  | NA | 0  | 0  | Low-quality    | Genome-fragment | 2.46  | 0 |
| 514_extracted_k141_52132  | 1104  | NA | 0  | 0  | Low-quality    | Genome-fragment | 3.54  | 0 |
| 59_vs_k141_49443  full    | 1031  | NA | 0  | 1  | Not-determined | Genome-fragment | NA    | 0 |
| 51_vs_k141_136180  full   | 1104  | NA | 2  | 0  | Low-quality    | Genome-fragment | 2.08  | 0 |
| 57_extracted_42177        | 1104  | NA | 0  | 0  | Low-quality    | Genome-fragment | 1.56  | 0 |
| 59_vs_k141_38250  full    | 2884  | NA | 0  | 1  | Not-determined | Genome-fragment | NA    | 0 |
| 57_vs_11585  H2gene       | 1104  | NA | 2  | 0  | Low-quality    | Genome-fragment | 2.73  | 0 |
| 59_vs_k141_60867  full    | 2914  | NA | 0  | 3  | Not-determined | Genome-fragment | NA    | 0 |
| 512_extracted_k141_117961 | 1104  | NA | 0  | 0  | Low-quality    | Genome-fragment | 1.1   | 0 |
| 59_vs_k141_30888  full    | 1717  | NA | 0  | 1  | Not-determined | Genome-fragment | NA    | 0 |
| 512_vs_k141_154122  full  | 1104  | NA | 0  | 0  | Low-quality    | Genome-fragment | 1.97  | 0 |
| 52_extracted_k141_14184   | 1104  | NA | 0  | 1  | Low-quality    | Genome-fragment | 0.49  | 0 |
| 56_vs_k141_8621  full     | 1104  | NA | 0  | 0  | Low-quality    | Genome-fragment | 3.08  | 0 |
| 58_vs_k141_4171  full     | 1104  | NA | 0  | 0  | Low-quality    | Genome-fragment | 0.68  | 0 |
| 517_extracted_k141_119617 | 1105  | NA | 1  | 0  | Low-quality    | Genome-fragment | 5.04  | 0 |
| 59_vs_k141_15509  full    | 2005  | NA | 0  | 1  | Not-determined | Genome-fragment | NA    | 0 |
| 59_vs_k141_7634  full     | 1920  | NA | 0  | 2  | Not-determined | Genome-fragment | NA    | 0 |
| 517_vs_k141_39701  full   | 1105  | NA | 0  | 1  | Low-quality    | Genome-fragment | 0.86  | 0 |
| 59_vs_k141_64753  full    | 1328  | NA | 0  | 2  | Not-determined | Genome-fragment | NA    | 0 |
| 59_extracted_k141_28637   | 1105  | NA | 1  | 0  | Low-quality    | Genome-fragment | 2.83  | 0 |
| 59_vs_k141_61685  full    | 1071  | NA | 0  | 1  | Not-determined | Genome-fragment | NA    | 0 |
| 59_vs_k141_55364  full    | 1105  | NA | 1  | 0  | Low-quality    | Genome-fragment | 1.49  | 0 |
| 511_extracted_k141_58544  | 1105  | NA | 1  | 0  | Low-quality    | Genome-fragment | 2.01  | 0 |
| 513_extracted_2292        | 1105  | NA | 0  | 0  | Low-quality    | Genome-fragment | 1.84  | 0 |
| 514_vs_k141_68324  full   | 1105  | NA | 0  | 1  | Low-quality    | Genome-fragment | 1.7   | 0 |
| 53_extracted_k141_74441   | 1105  | NA | 1  | 0  | Low-quality    | Genome-fragment | 1.87  | 0 |
| 59_vs_k141_64797  full    | 4492  | NA | 0  | 3  | Not-determined | Genome-fragment | NA    | 0 |
| 59_vs_k141_30768  full    | 3203  | NA | 0  | 0  | Not-determined | Genome-fragment | NA    | 0 |
| 55_vs_k141_114618  full   | 1105  | NA | 2  | 0  | Low-quality    | Genome-fragment | 2.93  | 0 |
| 57_extracted_2837         | 1105  | NA | 4  | 0  | Low-quality    | Genome-fragment | 3.64  | 0 |
| 59_vs_k141_4631  full     | 1106  | NA | 0  | 0  | Not-determined | Genome-fragment | NA    | 0 |
| 59_vs_k141_76015  full    | 1502  | NA | 0  | 1  | Not-determined | Genome-fragment | NA    | 0 |
| 57_vs_83481  H2gene       | 1105  | NA | 1  | 0  | Low-quality    | Genome-fragment | 3.19  | 0 |
| 516_extracted_127802      | 1105  | NA | 0  | 0  | Low-quality    | Genome-fragment | 1.97  | 0 |
| 516_vs_72966  full        | 1105  | NA | 0  | 0  | Low-quality    | Genome-fragment | 0.64  | 0 |
| 516_vs_95188  full        | 1105  | NA | 0  | 0  | Low-quality    | Genome-fragment | 0.67  | 0 |
| 59_vs_k141_76029  full    | 3635  | NA | 0  | 4  | Not-determined | Genome-fragment | NA    | 0 |
| 59_vs_k141_4911  full     | 3802  | NA | 0  | 0  | Not-determined | Genome-fragment | NA    | 0 |
| 512_extracted_k141_115834 | 1105  | NA | 1  | 0  | Low-quality    | Genome-fragment | 1.53  | 0 |
| 512_extracted_k141_129157 | 1105  | NA | 1  | 0  | Low-quality    | Genome-fragment | 2.07  | 0 |
| 59_vs_k141_7881  full     | 28502 | NA | 23 | 0  | Not-determined | Genome-fragment | 61.82 | 0 |
| 59_vs_k141_61025  full    | 1701  | NA | 0  | 2  | Not-determined | Genome-fragment | NA    | 0 |
| 56_extracted_k141_39793   | 1105  | NA | 0  | 0  | Low-quality    | Genome-fragment | 0.41  | 0 |
| 58_vs_k141_112073  full   | 1105  | NA | 0  | 1  | Low-quality    | Genome-fragment | 2.01  | 0 |
| 58_vs_k141_107188  H2gene | 1105  | NA | 1  | 0  | Low-quality    | Genome-fragment | 1.61  | 0 |
| 59_vs_k141_53442  full    | 1190  | NA | 0  | 0  | Not-determined | Genome-fragment | NA    | 0 |
| 59_vs_k141_73865  full    | 2757  | NA | 0  | 0  | Not-determined | Genome-fragment | NA    | 0 |
| 59_vs_k141_23184  full    | 10277 | NA | 0  | 0  | Not-determined | Genome-fragment | NA    | 0 |
| 59_vs_k141_15647  full    | 1381  | NA | 0  | 0  | Not-determined | Genome-fragment | NA    | 0 |
| 517_vs_k141_106261  full  | 1106  | NA | 5  | 0  | Low-quality    | Genome-fragment | 3.65  | 0 |
| 511_extracted_k141_12274  | 1106  | NA | 0  | 0  | Low-quality    | Genome-fragment | 1.71  | 0 |
| 59_vs_k141_19367  full    | 1103  | NA | 0  | 2  | Not-determined | Genome-fragment | NA    | 0 |
| 59_vs_k141_26934  full    | 1804  | NA | 0  | 0  | Not-determined | Genome-fragment | NA    | 0 |
| 514_extracted_k141_14541  | 1106  | NA | 0  | 0  | Low-quality    | Genome-fragment | 3.64  | 0 |
| 59_vs_k141_34601  full    | 1093  | NA | 0  | 1  | Not-determined | Genome-fragment | NA    | 0 |
| 51_extracted_k141_157185  | 1106  | NA | 1  | 0  | Low-quality    | Genome-fragment | 2.06  | 0 |
| 51_vs_k141_1116  full     | 1106  | NA | 0  | 0  | Low-quality    | Genome-fragment | 0.92  | 0 |
| 59_vs_k141_11881  full    | 1047  | NA | 0  | 0  | Not-determined | Genome-fragment | NA    | 0 |
| 51_vs_k141_72928  full    | 1106  | NA | 0  | 0  | Low-quality    | Genome-fragment | 1.95  | 0 |
| 59_vs_k141_72431  full    | 3372  | NA | 0  | 1  | Not-determined | Genome-fragment | NA    | 0 |
| 59_vs_k141_61077  full    | 1639  | NA | 0  | 0  | Not-determined | Genome-fragment | NA    | 0 |
| 59_vs_k141_80026  full    | 1601  | NA | 0  | 0  | Not-determined | Genome-fragment | NA    | 0 |
| 59_vs_k141_30850  full    | 1620  | NA | 0  | 2  | Not-determined | Genome-fragment | NA    | 0 |
| 55_vs_k141_87181  H2gene  | 1106  | NA | 1  | 0  | Low-quality    | Genome-fragment | 2.46  | 0 |
| 57_extracted_28574        | 1106  | NA | 0  | 0  | Low-quality    | Genome-fragment | 1.27  | 0 |
| 57_vs_49187  full         | 1106  | NA | 2  | 0  | Low-quality    | Genome-fragment | 2.77  | 0 |
| 57_vs_83840  full         | 1106  | NA | 0  | 1  | Low-quality    | Genome-fragment | 0.98  | 0 |
| 59_vs_k141_7993  full     | 1170  | NA | 0  | 1  | Not-determined | Genome-fragment | NA    | 0 |
| 59_vs_k141_30888  full    | 1675  | NA | 0  | 0  | Not-determined | Genome-fragment | NA    | 0 |
| 57_vs_85287  full         | 1106  | NA | 0  | 0  | Low-quality    | Genome-fragment | 1.09  | 0 |
| 516_extracted_25375       | 1106  | NA | 0  | 0  | Low-quality    | Genome-fragment | 0.64  | 0 |
| 59_vs_k141_38472  full    | 10302 | NA | 0  | 5  | Not-determined | Genome-fragment | NA    | 0 |
| 516_extracted_80254       | 1106  | NA | 0  | 0  | Low-quality    | Genome-fragment | 2.58  | 0 |
| 516_vs_104245  H2gene     | 1106  | NA | 0  | 0  | Low-quality    | Genome-fragment | 2.8   | 0 |
| 510_extracted_86464       | 1106  | NA | 0  | 2  | Low-quality    | Genome-fragment | 2.89  | 0 |
| 517_extracted_k141_29393  | 1107  | NA | 0  | 1  | Low-quality    | Genome-fragment | 0.37  | 0 |
| 517_vs_k141_99620  full   | 1107  | NA | 0  | 0  | Low-quality    | Genome-fragment | 1.33  | 0 |
| 517_vs_k141_17958  full   | 1107  | NA | 0  | 0  | Low-quality    | Genome-fragment | 2.13  | 0 |
| 514_extracted_k141_45144  | 1107  | NA | 4  | 0  | Low-quality    | Genome-fragment | 3.65  | 0 |
| 59_vs_k141_36021  full    | 2115  | NA | 0  | 1  | Not-determined | Genome-fragment | NA    | 0 |
| 514_extracted_k141_46476  | 1107  | NA |    |    |                |                 |       |   |



|                            |       |     |     |    |    |                |                 |       |       |
|----------------------------|-------|-----|-----|----|----|----------------|-----------------|-------|-------|
| S17_vs_k141_128416  H2gene | 1108  | No  | NA  | 1  | 0  | Low-quality    | Genome-fragment | 2.64  | 0     |
| S9_vs_k141_23349  full     | 1781  | No  | NA  | 0  | 1  | Not-determined | Genome-fragment | NA    | 0     |
| S9_vs_k141_80211  full     | 12108 | No  | NA  | 0  | 0  | Not-determined | Genome-fragment | NA    | 0     |
| S11_extracted_k141_86790   | 1108  | No  | NA  | 0  | 1  | Low-quality    | Genome-fragment | 0.99  | 0     |
| S9_vs_k141_61326  full     | 1810  | No  | NA  | 0  | 0  | Not-determined | Genome-fragment | NA    | 0     |
| S13_extracted_38147        | 1108  | No  | NA  | 0  | 1  | Low-quality    | Genome-fragment | 1.1   | 0     |
| S14_extracted_k141_101954  | 1108  | No  | NA  | 2  | 0  | Low-quality    | Genome-fragment | 3.66  | 0     |
| S9_vs_k141_47923  full     | 3500  | No  | NA  | 0  | 3  | Not-determined | Genome-fragment | NA    | 0     |
| S1_vs_k141_1371  full      | 1108  | No  | NA  | 0  | 0  | Low-quality    | Genome-fragment | 2.44  | 0     |
| S1_vs_k141_6030  full      | 1108  | No  | NA  | 1  | 0  | Low-quality    | Genome-fragment | 2.28  | 0     |
| S9_vs_k141_84013  full     | 2228  | No  | NA  | 0  | 1  | Not-determined | Genome-fragment | NA    | 0     |
| S3_vs_k141_17758  full     | 1108  | No  | NA  | 0  | 0  | Low-quality    | Genome-fragment | 2.02  | 0     |
| S3_vs_k141_106606  full    | 1108  | No  | NA  | 1  | 0  | Low-quality    | Genome-fragment | 1.99  | 0     |
| S5_extracted_k141_62752    | 1108  | No  | NA  | 1  | 0  | Low-quality    | Genome-fragment | 2.06  | 0     |
| S5_vs_k141_55093  full     | 1108  | No  | NA  | 1  | 0  | Low-quality    | Genome-fragment | 1.64  | 0     |
| S9_vs_k141_17274  full     | 7696  | No  | NA  | 0  | 3  | Not-determined | Genome-fragment | NA    | 0     |
| S5_vs_k141_138218  full    | 1108  | No  | NA  | 1  | 0  | Low-quality    | Genome-fragment | 2.15  | 0     |
| S9_vs_k141_4422  full      | 1031  | No  | NA  | 0  | 0  | Not-determined | Genome-fragment | NA    | 0     |
| S7_vs_25242  full          | 1108  | No  | NA  | 0  | 0  | Low-quality    | Genome-fragment | 2.7   | 0     |
| S9_vs_k141_53808  full     | 4644  | No  | NA  | 0  | 2  | Not-determined | Genome-fragment | NA    | 0     |
| S16_extracted_71420        | 1108  | No  | NA  | 0  | 0  | Low-quality    | Genome-fragment | 2.21  | 0     |
| S10_extracted_59679        | 1108  | No  | NA  | 0  | 0  | Low-quality    | Genome-fragment | 2.07  | 0     |
| S9_vs_k141_80322  full     | 1564  | No  | NA  | 0  | 0  | Not-determined | Genome-fragment | NA    | 0     |
| S10_vs_78830  full         | 1108  | No  | NA  | 2  | 0  | Low-quality    | Genome-fragment | 1.38  | 0     |
| S12_vs_k141_87824  full    | 1108  | No  | NA  | 0  | 0  | Low-quality    | Genome-fragment | 1.92  | 0     |
| S9_vs_k141_57451  full     | 1385  | No  | NA  | 0  | 0  | Not-determined | Genome-fragment | NA    | 0     |
| S11_extracted_k141_65833   | 1109  | No  | NA  | 0  | 0  | Low-quality    | Genome-fragment | 0.72  | 0     |
| S9_vs_k141_61358  full     | 1048  | No  | NA  | 0  | 0  | Not-determined | Genome-fragment | NA    | 0     |
| S9_vs_k141_17212  full     | 1214  | No  | NA  | 0  | 1  | Not-determined | Genome-fragment | NA    | 0     |
| S9_vs_k141_68803  full     | 2539  | No  | NA  | 0  | 1  | Not-determined | Genome-fragment | NA    | 0     |
| S11_extracted_k141_44061   | 1109  | No  | NA  | 2  | 0  | Low-quality    | Genome-fragment | 3.66  | 0     |
| S11_vs_k141_3963  full     | 1109  | No  | NA  | 0  | 0  | Low-quality    | Genome-fragment | 2.19  | 0     |
| S14_vs_k141_1212  full     | 1109  | No  | NA  | 1  | 0  | Low-quality    | Genome-fragment | 3.01  | 0     |
| S1_extracted_k141_149014   | 1109  | No  | NA  | 1  | 0  | Low-quality    | Genome-fragment | 1.84  | 0     |
| S1_vs_k141_17040  full     | 1109  | No  | NA  | 1  | 0  | Low-quality    | Genome-fragment | 1.76  | 0     |
| S9_vs_k141_17315  full     | 1300  | No  | NA  | 0  | 1  | Not-determined | Genome-fragment | NA    | 0     |
| S9_vs_k141_84046  full     | 28842 | No  | NA  | 14 | 1  | High-quality   | Genome-fragment | 93.21 | 0     |
| S7_extracted_7212          | 1109  | No  | NA  | 0  | 0  | Low-quality    | Genome-fragment | 0.71  | 0     |
| S9_vs_k141_69763  full     | 1493  | No  | NA  | 1  | 1  | Not-determined | Genome-fragment | NA    | 0     |
| S9_vs_k141_76374  full     | 4193  | No  | NA  | 0  | 2  | Not-determined | Genome-fragment | NA    | 0     |
| S9_vs_k141_57388  full     | 2324  | No  | NA  | 0  | 2  | Not-determined | Genome-fragment | NA    | 0     |
| S16_extracted_86065        | 1109  | No  | NA  | 0  | 0  | Low-quality    | Genome-fragment | 2.87  | 0     |
| S9_vs_k141_65082  full     | 1340  | No  | NA  | 0  | 2  | Not-determined | Genome-fragment | NA    | 0     |
| S16_extracted_163305       | 1109  | No  | NA  | 0  | 0  | Low-quality    | Genome-fragment | 0.7   | 0     |
| S9_vs_k141_23450  full     | 10166 | No  | NA  | 0  | 4  | Not-determined | Genome-fragment | NA    | 0     |
| S16_vs_113778  full        | 1109  | No  | NA  | 1  | 0  | Low-quality    | Genome-fragment | 2.32  | 0     |
| S16_vs_143661  H2gene      | 1109  | No  | NA  | 1  | 0  | Low-quality    | Genome-fragment | 1.89  | 0     |
| S9_vs_k141_47990  full     | 16416 | No  | NA  | 0  | 12 | Not-determined | Genome-fragment | NA    | 0     |
| S9_vs_k141_23454  full     | 1044  | No  | NA  | 0  | 2  | Not-determined | Genome-fragment | NA    | 0     |
| S12_vs_k141_110403  full   | 1109  | No  | NA  | 1  | 0  | Low-quality    | Genome-fragment | 1.98  | 0     |
| S9_vs_k141_38799  full     | 1961  | No  | NA  | 0  | 2  | Not-determined | Genome-fragment | NA    | 0     |
| S9_vs_k141_19649  full     | 1458  | No  | NA  | 0  | 0  | Not-determined | Genome-fragment | NA    | 0     |
| S9_vs_k141_34830  full     | 1695  | No  | NA  | 0  | 1  | Not-determined | Genome-fragment | NA    | 0     |
| S9_vs_k141_46141  full     | 1265  | No  | NA  | 0  | 0  | Not-determined | Genome-fragment | NA    | 0     |
| S9_vs_k141_49807  full     | 1073  | No  | NA  | 0  | 0  | Not-determined | Genome-fragment | NA    | 0     |
| S9_vs_k141_57424  full     | 2742  | No  | NA  | 0  | 0  | Not-determined | Genome-fragment | NA    | 0     |
| S8_vs_k141_93135  full     | 1109  | Yes | 656 | 1  | 1  | Low-quality    | Genome-fragment | 0.42  | 40.85 |
| S9_extracted_k141_23839    | 1110  | No  | NA  | 0  | 0  | Low-quality    | Genome-fragment | 1.85  | 0     |
| S9_vs_k141_4441  full      | 1110  | No  | NA  | 0  | 0  | Low-quality    | Genome-fragment | 2.19  | 0     |
| S13_vs_58422  full         | 1110  | No  | NA  | 1  | 0  | Low-quality    | Genome-fragment | 1.92  | 0     |
| S9_vs_k141_16064  full     | 1021  | No  | NA  | 0  | 1  | Not-determined | Genome-fragment | NA    | 0     |
| S9_vs_k141_46171  full     | 2740  | No  | NA  | 0  | 1  | Not-determined | Genome-fragment | NA    | 0     |
| S9_vs_k141_38853  full     | 2292  | No  | NA  | 0  | 0  | Not-determined | Genome-fragment | NA    | 0     |
| S9_vs_k141_23518  full     | 1352  | No  | NA  | 0  | 1  | Not-determined | Genome-fragment | NA    | 0     |
| S14_extracted_k141_10015   | 1110  | No  | NA  | 0  | 0  | Low-quality    | Genome-fragment | 1.59  | 0     |
| S1_vs_k141_15744  H2gene   | 1110  | No  | NA  | 1  | 0  | Low-quality    | Genome-fragment | 2.43  | 0     |
| S5_extracted_k141_61372    | 1110  | No  | NA  | 0  | 1  | Low-quality    | Genome-fragment | 0.74  | 0     |
| S7_extracted_121283        | 1110  | No  | NA  | 0  | 0  | Low-quality    | Genome-fragment | 0.7   | 0     |
| S7_extracted_136006        | 1110  | No  | NA  | 0  | 0  | Low-quality    | Genome-fragment | 1.71  | 0     |
| S7_vs_47980  full          | 1110  | No  | NA  | 0  | 0  | Low-quality    | Genome-fragment | 2.33  | 0     |
| S7_vs_89428  full          | 1110  | No  | NA  | 0  | 1  | Low-quality    | Genome-fragment | 0.3   | 0     |
| S9_vs_k141_19689  full     | 28742 | No  | NA  | 11 | 1  | Medium-quality | Genome-fragment | 62.31 | 0     |
| S7_vs_118831  full         | 1110  | No  | NA  | 0  | 0  | Low-quality    | Genome-fragment | 1.45  | 0     |
| S10_extracted_32826        | 1110  | No  | NA  | 0  | 1  | Low-quality    | Genome-fragment | 0.33  | 0     |
| S9_vs_k141_61504  full     | 2310  | No  | NA  | 0  | 2  | Not-determined | Genome-fragment | NA    | 0     |
| S9_vs_k141_65132  full     | 1662  | No  | NA  | 0  | 1  | Not-determined | Genome-fragment | NA    | 0     |
| S9_vs_k141_27348  full     | 1187  | No  | NA  | 0  | 0  | Not-determined | Genome-fragment | NA    | 0     |
| S9_vs_k141_12619  full     | 1494  | No  | NA  | 0  | 1  | Not-determined | Genome-fragment | NA    | 0     |
| S12_vs_k141_118277  full   | 1110  | No  | NA  | 0  | 0  | Low-quality    | Genome-fragment | 1.76  | 0     |
| S9_vs_k141_12307  full     | 3099  | No  | NA  | 0  | 4  | Not-determined | Genome-fragment | NA    | 0     |
| S9_vs_k141_34898  full     | 31642 | No  | NA  | 25 | 0  | Medium-quality | Genome-fragment | 78.72 | 0     |
| S9_vs_k141_17851  full     | 1486  | No  | NA  | 0  | 0  | Not-determined | Genome-fragment | NA    | 0     |
| S9_vs_k141_65155  full     | 1349  | No  | NA  | 0  | 0  | Not-determined | Genome-fragment | NA    | 0     |
| S9_vs_k141_61525  full     | 6375  | No  | NA  | 0  | 6  | Not-determined | Genome-fragment | NA    | 0     |
| S12_vs_k141_53502  full    | 1110  | No  | NA  | 0  | 0  | Low-quality    | Genome-fragment | 2.17  | 0     |
| S9_vs_k141_38942  full     | 1617  | No  | NA  | 0  | 1  | Not-determined | Genome-fragment | NA    | 0     |
| S6_extracted_k141_7331     | 1110  | No  | NA  | 0  | 0  | Low-quality    | Genome-fragment | 1.15  | 0     |
| S9_vs_k141_4558  full      | 61044 | No  | NA  | 32 | 0  | High-quality   | High-quality    | 96.55 | 0     |
| S8_extracted_k141_36534    | 1110  | No  | NA  | 0  | 0  | Low-quality    | Genome-fragment | 0.88  | 0     |
| S9_vs_k141_31299  full     | 2184  | No  | NA  | 0  | 0  | Not-determined | Genome-fragment | NA    | 0     |
| S8_vs_k141_57424  full     | 1110  | No  | NA  | 1  | 0  | Low-quality    | Genome-fragment | 1.84  | 0     |
| S14_extracted_k141_1057    | 1111  | No  | NA  | 0  | 0  | Low-quality    | Genome-fragment | 2.9   | 0     |
| S9_vs_k141_68847  full     | 1551  | No  | NA  | 0  | 0  | Not-determined | Genome-fragment | NA    | 0     |
| S3_extracted_k141_84807    | 1111  | No  | NA  | 0  | 0  | Low-quality    | Genome-fragment | 1.8   | 0     |
| S9_vs_k141_24177  full     | 1111  | No  | NA  | 0  | 0  | Low-quality    | Genome-fragment | 1.06  | 0     |
| S9_vs_k141_15830  full     | 1111  | No  | NA  | 0  | 0  | Low-quality    | Genome-fragment | 0.91  | 0     |
| S5_extracted_k141_25424    | 1111  | No  | NA  | 1  | 0  | Low-quality    | Genome-fragment | 2.25  | 0     |
| S9_vs_k141_65203  full     | 1661  | No  | NA  | 0  | 0  | Not-determined | Genome-fragment | NA    | 0     |
| S9_vs_k141_46337  full     | 3419  | No  | NA  | 0  | 0  | Not-determined | Genome-fragment | NA    | 0     |
| S7_extracted_130720        | 1111  | No  | NA  | 0  | 0  | Low-quality    | Genome-fragment | 1.98  | 0     |
| S9_vs_k141_47151  full     | 3388  | No  | NA  | 0  | 2  | Not-determined | Genome-fragment | NA    | 0     |
| S7_vs_84606  full          | 1111  | No  | NA  | 0  | 0  | Low-quality    | Genome-fragment | 2.46  | 0     |
| S7_vs_86235  full          | 1111  | No  | NA  | 0  | 0  | Low-quality    | Genome-fragment | 1.52  | 0     |
| S16_extracted_82636        | 1111  | No  | NA  | 1  | 0  | Low-quality    | Genome-fragment | 23.29 | 0     |
| S16_extracted_109468       | 1111  | No  | NA  | 0  | 0  | Low-quality    | Genome-fragment | 2.19  | 0     |
| S16_vs_12247  full         | 1111  | No  | NA  | 1  | 0  | Low-quality    | Genome-fragment | 0.77  | 0     |
| S16_vs_105559  full        | 1111  | No  | NA  | 1  | 0  | Low-quality    | Genome-fragment | 1.95  | 0     |
| S10_extracted_26796        | 1111  | No  | NA  | 1  | 0  | Low-quality    | Genome-fragment | 2.79  | 0     |
| S10_vs_50717  full         | 1111  | No  | NA  | 0  | 0  | Low-quality    | Genome-fragment | 2.4   | 0     |
| S9_vs_k141_35043  full     | 1014  | No  | NA  | 0  | 2  | Not-determined | Genome-fragment | NA    | 0     |
| S12_vs_k141_153035  full   | 1111  | No  | NA  | 1  | 0  | Low-quality    | Genome-fragment | 0.56  | 0     |
| S9_vs_k141_16270  full     | 3886  | No  | NA  | 1  | 0  | Not-determined | Genome-fragment | NA    | 0     |
| S12_vs_k141_69652  full    | 1111  | No  | NA  | 2  | 0  | Low-quality    | Genome-fragment | 3.11  | 0     |
| S15_vs_59162  full         | 1111  | No  | NA  | 3  | 0  | Low-quality    | Genome-fragment | 2.91  | 0     |
| S9_vs_k141_54121  full     | 2687  | No  | NA  | 0  | 0  | Not-determined | Genome-fragment | NA    | 0     |
| S9_vs_k141_27444  full     | 5218  | No  | NA  | 0  | 5  | Not-determined | Genome-fragment | NA    | 0     |
| S8_extracted_k141_130510   | 1111  | No  | NA  | 2  | 0  | Low-quality    | Genome-fragment | 0.6   | 0     |
| S8_extracted_k141_139608   | 1111  | No  | NA  | 0  | 1  | Low-quality    | Genome-fragment | 0.88  | 0     |
| S7_vs_k141_167005  full    | 1112  | No  | NA  | 0  | 0  | Low-quality    | Genome-fragment | 2.17  | 0     |
| S9_vs_k141_15846  full     | 1199  | No  | NA  | 0  | 1  | Not-determined | Genome-fragment | NA    | 0     |
| S9_vs_k141_141002  H2gene  | 1112  | No  | NA  | 1  | 0  | Low-quality    | Genome-fragment | 2.57  | 0     |
| S11_vs_k141_35150  full    | 1112  | No  | NA  | 0  | 0  | Low-quality    | Genome-fragment | 1.68  | 0     |
| S13_vs_149361  full        | 1112  | No  | NA  | 0  | 0  | Low-quality    | Genome-fragment | 0.97  | 0     |
| S11_extracted_k141_138468  | 1112  | No  | NA  | 0  | 0  | Low-quality    | Genome-fragment | 1.94  | 0     |
| S1_vs_k141_53360  full     | 1112  | No  | NA  | 0  | 0  | Low-quality    | Genome-fragment | 2.56  | 0     |
| S5_extracted_k141_145507   | 1112  | No  | NA  | 2  | 0  | Low-quality    | Genome-fragment | 2.89  | 0     |
| S10_vs_7700  full          | 1112  | No  | NA  | 0  | 0  | Low-quality    | Genome-fragment | 2.05  | 0     |
| S12_extracted_k141_151512  | 1112  | No  | NA  | 0  | 0  | Low-quality    | Genome-fragment | 1.96  | 0     |
| S9_vs_k141_23643  full     | 1785  | No  | NA  | 0  | 1  | Not-determined | Genome-fragment | NA    | 0     |
| S12_extracted_k141_42555   | 1112  | No  | NA  | 2  | 0  | Low-quality    | Genome-fragment | 1.18  | 0     |
| S12_extracted_k141_132308  | 1112  | No  | NA  | 1  | 0  | Low-quality    | Genome-fragment | 2.45  | 0     |
| S15_extracted_70105        | 1112  | No  | NA  | 2  | 0  | Low-quality    | Genome-fragment | 1.89  | 0     |
| S9_vs_k141_57660  full     | 1696  | No  | NA  | 0  | 1  | Not-determined | Genome-fragment | NA    | 0     |
| S9_vs_k141_19872  full     | 1604  | No  | NA  | 0  | 0  | Not-determined | Genome-fragment | NA    | 0     |
| S9_vs_k141_17506  full     | 3442  | No  | NA  | 0  | 1  | Not-determined | Genome-fragment | NA    | 0     |
| S8_extracted_k141_72612    | 1112  | No  | NA  | 0  | 1  | Low-quality    | Genome-fragment | 0.6   | 0     |
| S8_vs_k141_151134  full    | 1112  | No  | NA  | 2  | 0  | Low-quality    | Genome-fragment | 2.68  | 0     |
| S9_vs_k141_50152  full     | 1630  | No  | NA  | 0  | 0  | Not-determined | Genome-fragment | NA    | 0     |
| S9_vs_k141_39152  full     | 1316  | No  | NA  | 0  | 1  | Not-determined | Genome-fragment | NA    | 0     |
| S9_vs_k141_54219  full     | 2213  | No  | NA  | 0  | 0  | Not-determined | Genome-fragment | NA    | 0     |
| S9_vs_k141_17562  full     | 1058  | No  | NA  | 0  | 0  | Not-determined | Genome-fragment | NA    | 0     |
| S9_vs_k141_50157  full     | 2113  | No  | NA  | 0  | 2  | Not-determined | Genome-fragment | NA    | 0     |
| S17_extracted_k141_16517   | 1113  | No  | NA  | 2  | 0  | Low-quality    | Genome-fragment | 2.51  | 0     |
| S9_vs_k141_68947  full     | 1674  | No  | NA  | 0  | 0  | Not-determined | Genome-fragment | NA    | 0     |
| S17_vs_k141_126085  full   | 11    |     |     |    |    |                |                 |       |       |



|                            |       |    |    |    |   |                |                 |       |   |
|----------------------------|-------|----|----|----|---|----------------|-----------------|-------|---|
| 512_vs_k141_145808  full   | 1114  | No | NA | 0  | 0 | Low-quality    | Genome-fragment | 2.17  | 0 |
| 59_vs_k141_57763  full     | 1000  | No | NA | 1  | 1 | Not-determined | Genome-fragment | NA    | 0 |
| 59_vs_k141_86382  full     | 2419  | No | NA | 0  | 0 | Not-determined | Genome-fragment | NA    | 0 |
| 56_vs_k141_49362  H2gene   | 1114  | No | NA | 1  | 0 | Low-quality    | Genome-fragment | 2.47  | 0 |
| 58_extracted_k141_123306   | 1114  | No | NA | 0  | 1 | Low-quality    | Genome-fragment | 0.62  | 0 |
| 59_vs_k141_12660  full     | 2912  | No | NA | 0  | 1 | Not-determined | Genome-fragment | NA    | 0 |
| 58_vs_k141_177801  H2gene  | 1114  | No | NA | 1  | 0 | Low-quality    | Genome-fragment | 2.02  | 0 |
| 59_vs_k141_61710  full     | 2013  | No | NA | 0  | 0 | Not-determined | Genome-fragment | NA    | 0 |
| 59_vs_k141_20047  full     | 1466  | No | NA | 0  | 1 | Not-determined | Genome-fragment | NA    | 0 |
| 59_vs_k141_57781  full     | 1721  | No | NA | 0  | 2 | Not-determined | Genome-fragment | NA    | 0 |
| 517_vs_k141_111351  full   | 1115  | No | NA | 0  | 0 | Low-quality    | Genome-fragment | 2.83  | 0 |
| 59_vs_k141_16562  full     | 3295  | No | NA | 0  | 1 | Not-determined | Genome-fragment | NA    | 0 |
| 59_extracted_k141_82932    | 1115  | No | NA | 0  | 1 | Low-quality    | Genome-fragment | 0.48  | 0 |
| 51_extracted_k141_155062   | 1115  | No | NA | 0  | 0 | Low-quality    | Genome-fragment | 0.63  | 0 |
| 51_extracted_k141_65053    | 1115  | No | NA | 0  | 2 | Low-quality    | Genome-fragment | 2.13  | 0 |
| 59_vs_k141_61739  full     | 1068  | No | NA | 0  | 1 | Not-determined | Genome-fragment | NA    | 0 |
| 53_vs_k141_48341  full     | 1115  | No | NA | 0  | 0 | Low-quality    | Genome-fragment | 1.62  | 0 |
| 59_vs_k141_54410  full     | 3249  | No | NA | 0  | 1 | Not-determined | Genome-fragment | NA    | 0 |
| 55_vs_k141_24728  full     | 1115  | No | NA | 0  | 0 | Low-quality    | Genome-fragment | 2.81  | 0 |
| 59_vs_k141_27764  full     | 1154  | No | NA | 0  | 1 | Not-determined | Genome-fragment | NA    | 0 |
| 57_vs_96531  full          | 1115  | No | NA | 0  | 0 | Low-quality    | Genome-fragment | 2.03  | 0 |
| 59_vs_k141_35366  full     | 1361  | No | NA | 0  | 0 | Not-determined | Genome-fragment | NA    | 0 |
| 59_vs_k141_80599  full     | 2506  | No | NA | 0  | 2 | Not-determined | Genome-fragment | NA    | 0 |
| 59_vs_k141_65448  full     | 2818  | No | NA | 0  | 0 | Not-determined | Genome-fragment | NA    | 0 |
| 516_extracted_86421        | 1115  | No | NA | 0  | 0 | Low-quality    | Genome-fragment | 2.23  | 0 |
| 512_extracted_k141_137235  | 1115  | No | NA | 0  | 1 | Low-quality    | Genome-fragment | 0.27  | 0 |
| 512_extracted_k141_98660   | 1115  | No | NA | 0  | 0 | Low-quality    | Genome-fragment | 1.8   | 0 |
| 58_vs_k141_187193  full    | 1115  | No | NA | 0  | 0 | Low-quality    | Genome-fragment | 2.3   | 0 |
| 58_vs_k141_69241  full     | 1115  | No | NA | 0  | 0 | Low-quality    | Genome-fragment | 1.62  | 0 |
| 59_vs_k141_69154  full     | 4501  | No | NA | 0  | 1 | Not-determined | Genome-fragment | NA    | 0 |
| 517_vs_k141_161343  H2gene | 1116  | No | NA | 2  | 0 | Low-quality    | Genome-fragment | 2.57  | 0 |
| 59_vs_k141_21629  full     | 1116  | No | NA | 0  | 0 | Low-quality    | Genome-fragment | 2.78  | 0 |
| 51_vs_k141_41443  full     | 1116  | No | NA | 0  | 0 | Low-quality    | Genome-fragment | 1.96  | 0 |
| 59_vs_k141_35410  full     | 1059  | No | NA | 0  | 1 | Not-determined | Genome-fragment | NA    | 0 |
| 59_vs_k141_23801  full     | 1451  | No | NA | 0  | 0 | Not-determined | Genome-fragment | NA    | 0 |
| 59_vs_k141_93399  full     | 1102  | No | NA | 0  | 0 | Not-determined | Genome-fragment | NA    | 0 |
| 53_extracted_k141_80886    | 1116  | No | NA | 1  | 0 | Low-quality    | Genome-fragment | 0.83  | 0 |
| 53_extracted_k141_74088    | 1116  | No | NA | 1  | 0 | Low-quality    | Genome-fragment | 1.96  | 0 |
| 59_vs_k141_43089  full     | 2699  | No | NA | 0  | 1 | Not-determined | Genome-fragment | NA    | 0 |
| 59_vs_k141_69207  full     | 1103  | No | NA | 0  | 0 | Not-determined | Genome-fragment | NA    | 0 |
| 510_vs_10326  full         | 1116  | No | NA | 0  | 0 | Low-quality    | Genome-fragment | 0.98  | 0 |
| 510_vs_103190  full        | 1116  | No | NA | 0  | 0 | Low-quality    | Genome-fragment | 7.51  | 0 |
| 59_vs_k141_27813  full     | 43436 | No | NA | 17 | 1 | High-quality   | High-quality    | 96.78 | 0 |
| 512_extracted_k141_100684  | 1116  | No | NA | 0  | 1 | Low-quality    | Genome-fragment | 1.35  | 0 |
| 59_vs_k141_88561  full     | 1717  | No | NA | 0  | 0 | Not-determined | Genome-fragment | NA    | 0 |
| 59_vs_k141_57881  full     | 2890  | No | NA | 0  | 0 | Not-determined | Genome-fragment | NA    | 0 |
| 59_vs_k141_76712  full     | 1296  | No | NA | 0  | 1 | Not-determined | Genome-fragment | NA    | 0 |
| 59_vs_k141_20551  full     | 1699  | No | NA | 0  | 0 | Not-determined | Genome-fragment | NA    | 0 |
| 512_vs_k141_185287  full   | 1116  | No | NA | 0  | 0 | Low-quality    | Genome-fragment | 1.64  | 0 |
| 59_vs_k141_88571  full     | 3357  | No | NA | 0  | 3 | Not-determined | Genome-fragment | NA    | 0 |
| 59_vs_k141_50701  full     | 2620  | No | NA | 0  | 3 | Not-determined | Genome-fragment | NA    | 0 |
| 58_extracted_k141_23065    | 1116  | No | NA | 0  | 0 | Low-quality    | Genome-fragment | 2.56  | 0 |
| 58_extracted_k141_137145   | 1116  | No | NA | 0  | 1 | Low-quality    | Genome-fragment | 1.73  | 0 |
| 58_vs_k141_49103  H2gene   | 1116  | No | NA | 1  | 0 | Low-quality    | Genome-fragment | 1.97  | 0 |
| 59_vs_k141_14001  full     | 3399  | No | NA | 0  | 0 | Not-determined | Genome-fragment | NA    | 0 |
| 517_extracted_k141_169811  | 1117  | No | NA | 0  | 0 | Low-quality    | Genome-fragment | 1.89  | 0 |
| 59_vs_k141_23914  full     | 1498  | No | NA | 0  | 0 | Not-determined | Genome-fragment | NA    | 0 |
| 59_vs_k141_14071  full     | 2816  | No | NA | 0  | 1 | Not-determined | Genome-fragment | NA    | 0 |
| 59_vs_k141_29459  full     | 1612  | No | NA | 0  | 0 | Not-determined | Genome-fragment | NA    | 0 |
| 511_vs_k141_65106  H2gene  | 1117  | No | NA | 1  | 0 | Low-quality    | Genome-fragment | 2.71  | 0 |
| 51_extracted_k141_94498    | 1117  | No | NA | 0  | 0 | Low-quality    | Genome-fragment | 2.72  | 0 |
| 55_vs_k141_73091  full     | 1117  | No | NA | 0  | 0 | Low-quality    | Genome-fragment | 1.07  | 0 |
| 59_vs_k141_23945  full     | 2418  | No | NA | 0  | 1 | Not-determined | Genome-fragment | NA    | 0 |
| 59_vs_k141_20284  full     | 1192  | No | NA | 0  | 1 | Not-determined | Genome-fragment | NA    | 0 |
| 55_vs_k141_13861  full     | 1117  | No | NA | 0  | 0 | Low-quality    | Genome-fragment | 3.04  | 0 |
| 55_vs_k141_94334  H2gene   | 1117  | No | NA | 1  | 0 | Low-quality    | Genome-fragment | 2.85  | 0 |
| 59_vs_k141_43200  full     | 1301  | No | NA | 0  | 1 | Not-determined | Genome-fragment | NA    | 0 |
| 59_vs_k141_23985  full     | 2717  | No | NA | 0  | 0 | Not-determined | Genome-fragment | NA    | 0 |
| 57_vs_79136  full          | 1117  | No | NA | 0  | 0 | Low-quality    | Genome-fragment | 2.52  | 0 |
| 516_extracted_143432       | 1117  | No | NA | 0  | 2 | Low-quality    | Genome-fragment | 0.72  | 0 |
| 516_vs_29224  full         | 1117  | No | NA | 1  | 0 | Low-quality    | Genome-fragment | 0.71  | 0 |
| 512_extracted_k141_13809   | 1117  | No | NA | 0  | 0 | Low-quality    | Genome-fragment | 1.53  | 0 |
| 59_vs_k141_69322  full     | 27451 | No | NA | 3  | 0 | Medium-quality | Genome-fragment | 68.73 | 0 |
| 512_extracted_k141_39912   | 1117  | No | NA | 0  | 0 | Low-quality    | Genome-fragment | 2.37  | 0 |
| 59_vs_k141_94512  full     | 2150  | No | NA | 0  | 0 | Not-determined | Genome-fragment | NA    | 0 |
| 59_vs_k141_43255  full     | 1148  | No | NA | 0  | 0 | Not-determined | Genome-fragment | NA    | 0 |
| 512_extracted_k141_151507  | 1117  | No | NA | 0  | 1 | Low-quality    | Genome-fragment | 1.14  | 0 |
| 517_vs_k141_74821  full    | 1118  | No | NA | 0  | 0 | Low-quality    | Genome-fragment | 2.04  | 0 |
| 51_vs_k141_131812  full    | 1118  | No | NA | 0  | 0 | Low-quality    | Genome-fragment | 1.47  | 0 |
| 59_vs_k141_15311  full     | 3372  | No | NA | 0  | 2 | Not-determined | Genome-fragment | NA    | 0 |
| 59_vs_k141_17891  full     | 1118  | No | NA | 1  | 0 | Low-quality    | Genome-fragment | 1.44  | 0 |
| 57_extracted_84298         | 1118  | No | NA | 0  | 0 | Low-quality    | Genome-fragment | 1.41  | 0 |
| 57_vs_43857  full          | 1118  | No | NA | 0  | 0 | Low-quality    | Genome-fragment | 0.87  | 0 |
| 59_vs_k141_14512  full     | 3125  | No | NA | 0  | 0 | Not-determined | Genome-fragment | NA    | 0 |
| 57_vs_131256  H2gene       | 1118  | No | NA | 0  | 0 | Low-quality    | Genome-fragment | 2.5   | 0 |
| 516_vs_128966  full        | 1118  | No | NA | 1  | 0 | Low-quality    | Genome-fragment | 1.57  | 0 |
| 59_vs_k141_65752  full     | 2477  | No | NA | 0  | 0 | Not-determined | Genome-fragment | NA    | 0 |
| 56_vs_k141_20143  full     | 1118  | No | NA | 0  | 0 | Low-quality    | Genome-fragment | 3.12  | 0 |
| 59_vs_k141_67821  full     | 1515  | No | NA | 0  | 0 | Not-determined | Genome-fragment | NA    | 0 |
| 59_vs_k141_65771  full     | 2824  | No | NA | 0  | 1 | Not-determined | Genome-fragment | NA    | 0 |
| 59_vs_k141_76801  full     | 1703  | No | NA | 0  | 1 | Not-determined | Genome-fragment | NA    | 0 |
| 59_vs_k141_68111  full     | 1040  | No | NA | 0  | 1 | Not-determined | Genome-fragment | NA    | 0 |
| 59_vs_k141_28017  full     | 1910  | No | NA | 0  | 0 | Not-determined | Genome-fragment | NA    | 0 |
| 58_vs_k141_151875  full    | 1118  | No | NA | 1  | 0 | Low-quality    | Genome-fragment | 0.8   | 0 |
| 511_extracted_k141_13197   | 1119  | No | NA | 0  | 0 | Low-quality    | Genome-fragment | 2.33  | 0 |
| 59_vs_k141_80939  full     | 2812  | No | NA | 0  | 2 | Not-determined | Genome-fragment | NA    | 0 |
| 59_vs_k141_28050  full     | 1485  | No | NA | 0  | 0 | Not-determined | Genome-fragment | NA    | 0 |
| 59_vs_k141_28466  full     | 3517  | No | NA | 0  | 2 | Not-determined | Genome-fragment | NA    | 0 |
| 511_vs_k141_1953  full     | 1119  | No | NA | 0  | 0 | Low-quality    | Genome-fragment | 2.53  | 0 |
| 59_vs_k141_62110  full     | 2179  | No | NA | 0  | 1 | Not-determined | Genome-fragment | NA    | 0 |
| 514_extracted_k141_64504   | 1119  | No | NA | 0  | 1 | Low-quality    | Genome-fragment | 0.54  | 0 |
| 59_vs_k141_80965  full     | 1421  | No | NA | 0  | 0 | Not-determined | Genome-fragment | NA    | 0 |
| 53_vs_k141_28434  full     | 1119  | No | NA | 0  | 0 | Low-quality    | Genome-fragment | 2.67  | 0 |
| 59_vs_k141_86726  full     | 1119  | No | NA | 1  | 0 | Low-quality    | Genome-fragment | 0.45  | 0 |
| 53_vs_k141_36985  H2gene   | 1119  | No | NA | 0  | 0 | Low-quality    | Genome-fragment | 2.93  | 0 |
| 59_vs_k141_73523  full     | 2790  | No | NA | 0  | 1 | Not-determined | Genome-fragment | NA    | 0 |
| 55_vs_k141_6038  full      | 1119  | No | NA | 2  | 0 | Low-quality    | Genome-fragment | 2.47  | 0 |
| 57_vs_102789  full         | 1119  | No | NA | 1  | 0 | Low-quality    | Genome-fragment | 3.07  | 0 |
| 516_vs_42031  full         | 1119  | No | NA | 1  | 0 | Low-quality    | Genome-fragment | 0.58  | 0 |
| 516_vs_150929  full        | 1119  | No | NA | 1  | 0 | Low-quality    | Genome-fragment | 2.86  | 0 |
| 510_extracted_40388        | 1119  | No | NA | 0  | 0 | Low-quality    | Genome-fragment | 1.78  | 0 |
| 59_vs_k141_14656  full     | 1558  | No | NA | 0  | 0 | Not-determined | Genome-fragment | NA    | 0 |
| 512_extracted_k141_5959    | 1119  | No | NA | 0  | 1 | Low-quality    | Genome-fragment | 1.49  | 0 |
| 59_vs_k141_14660  full     | 1831  | No | NA | 0  | 0 | Not-determined | Genome-fragment | NA    | 0 |
| 512_vs_k141_165004  full   | 1119  | No | NA | 0  | 0 | Low-quality    | Genome-fragment | 2.02  | 0 |
| 58_extracted_k141_86993    | 1119  | No | NA | 1  | 1 | Low-quality    | Genome-fragment | 2.88  | 0 |
| 517_extracted_k141_73525   | 1120  | No | NA | 0  | 0 | Low-quality    | Genome-fragment | 1.19  | 0 |
| 59_vs_k141_16931  full     | 4421  | No | NA | 0  | 2 | Not-determined | Genome-fragment | NA    | 0 |
| 59_vs_k141_58086  full     | 27326 | No | NA | 12 | 0 | Medium-quality | Genome-fragment | 77.03 | 0 |
| 59_vs_k141_85531  full     | 1120  | No | NA | 2  | 0 | Low-quality    | Genome-fragment | 2.5   | 0 |
| 513_vs_81061  full         | 1120  | No | NA | 0  | 1 | Low-quality    | Genome-fragment | 0.44  | 0 |
| 514_vs_k141_39309  H2gene  | 1120  | No | NA | 0  | 0 | Low-quality    | Genome-fragment | 1.64  | 0 |
| 514_vs_k141_19519  H2gene  | 1120  | No | NA | 1  | 0 | Low-quality    | Genome-fragment | 2.29  | 0 |
| 59_vs_k141_39674  full     | 1290  | No | NA | 0  | 1 | Not-determined | Genome-fragment | NA    | 0 |
| 59_vs_k141_35808  full     | 3513  | No | NA | 0  | 1 | Not-determined | Genome-fragment | NA    | 0 |
| 53_extracted_k141_124092   | 1120  | No | NA | 0  | 0 | Low-quality    | Genome-fragment | 1.19  | 0 |
| 59_vs_k141_14678  full     | 1991  | No | NA | 0  | 2 | Not-determined | Genome-fragment | NA    | 0 |
| 510_extracted_21573        | 1120  | No | NA | 0  | 0 | Low-quality    | Genome-fragment | 0.5   | 0 |
| 512_extracted_k141_124236  | 1120  | No | NA | 0  | 1 | Low-quality    | Genome-fragment | 3.04  | 0 |
| 59_vs_k141_35820  full     | 4800  | No | NA | 0  | 2 | Not-determined | Genome-fragment | NA    | 0 |
| 515_vs_45881  full         | 1120  | No | NA | 0  | 0 | Low-quality    | Genome-fragment | 0.45  | 0 |
| 59_vs_k141_15880  full     | 1271  | No | NA | 0  | 1 | Not-determined | Genome-fragment | NA    | 0 |
| 59_vs_k141_28197  full     | 27879 | No | NA | 10 | 0 | Medium-quality | Genome-fragment | 74.59 | 0 |
| 515_vs_70494  full         | 1120  | No | NA | 0  | 3 | Low-quality    | Genome-fragment | 1.85  | 0 |
| 59_vs_k141_17481  full     | 1704  | No | NA | 0  | 1 | Not-determined | Genome-fragment | NA    | 0 |
| 59_vs_k141_20616  full     | 1812  | No | NA | 0  | 1 | Not-determined | Genome-fragment | NA    | 0 |
| 59_vs_k141_15857  full     | 1403  | No | NA | 0  | 1 | Not-determined | Genome-fragment | NA    | 0 |
| 58_extracted_k141_138848   | 1120  | No | NA | 0  | 0 | Low-quality    | Genome-fragment | 2.8   | 0 |
| 59_vs_k141_54753  full     | 1321  | No | NA | 0  | 0 | Not-determined | Genome-fragment | NA    | 0 |
| 59_vs_k141_65837  full     | 1297  | No | NA | 0  | 0 | Not-determined | Genome-fragment | NA    | 0 |
| 59_vs_k141_14348  full     | 2065  | No | NA | 0  | 1 | Not-determined | Genome-fragment | NA    | 0 |
| 517_extracted_k141_76555   | 1121  | No | NA | 0  | 0 | Low-quality    | Genome-fragment | 2.12  | 0 |
| 59_vs_k141                 |       |    |    |    |   |                |                 |       |   |



|                            |       |    |    |    |                |                 |                 |       |   |
|----------------------------|-------|----|----|----|----------------|-----------------|-----------------|-------|---|
| 54_extracted_13057         | 1121  | No | NA | 0  | 0              | Low-quality     | Genome-fragment | 1.06  | 0 |
| 58_extracted_k141_152045   | 1121  | No | NA | 0  | 0              | Low-quality     | Genome-fragment | 0.66  | 0 |
| 517_vs_k141_149950  full   | 1122  | No | NA | 0  | 0              | Low-quality     | Genome-fragment | 1.67  | 0 |
| 59_vs_k141_81209  full     | 1203  | No | NA | 0  | 2              | Not-determined  | Genome-fragment | NA    | 0 |
| 51_vs_k141_102255  full    | 1122  | No | NA | 0  | 0              | Low-quality     | Genome-fragment | 2.06  | 0 |
| 59_vs_k141_46927  full     | 2539  | No | NA | 0  | 1              | Not-determined  | Genome-fragment | NA    | 0 |
| 51_vs_k141_32263  full     | 1122  | No | NA | 1  | 0              | Low-quality     | Genome-fragment | 1.83  | 0 |
| 53_extracted_k141_106953   | 1122  | No | NA | 0  | 0              | Low-quality     | Genome-fragment | 2.32  | 0 |
| 55_extracted_k141_144238   | 1122  | No | NA | 0  | 0              | Low-quality     | Genome-fragment | 1.37  | 0 |
| 59_vs_k141_24472  full     | 4571  | No | NA | 0  | 3              | Not-determined  | Genome-fragment | NA    | 0 |
| 57_extracted_10877         | 1122  | No | NA | 1  | 0              | Low-quality     | Genome-fragment | 3.62  | 0 |
| 59_vs_k141_1894  full      | 3001  | No | NA | 0  | 0              | Not-determined  | Genome-fragment | NA    | 0 |
| 57_vs_21364  full          | 1122  | No | NA | 1  | 0              | Low-quality     | Genome-fragment | 2.23  | 0 |
| 516_vs_56427  H2gene       | 1122  | No | NA | 1  | 0              | Low-quality     | Genome-fragment | 3.29  | 0 |
| 59_vs_k141_24241  full     | 3130  | No | NA | 0  | 1              | Not-determined  | Genome-fragment | NA    | 0 |
| 510_vs_61189  full         | 1122  | No | NA | 0  | 1              | Low-quality     | Genome-fragment | 2.4   | 0 |
| 59_vs_k141_65910  full     | 1709  | No | NA | 0  | 2              | Not-determined  | Genome-fragment | NA    | 0 |
| 510_vs_79667  full         | 1122  | No | NA | 0  | 0              | Low-quality     | Genome-fragment | 3.04  | 0 |
| 59_vs_k141_18450  full     | 1747  | No | NA | 0  | 0              | Not-determined  | Genome-fragment | NA    | 0 |
| 59_vs_k141_1930  full      | 1187  | No | NA | 0  | 0              | Not-determined  | Genome-fragment | NA    | 0 |
| 512_extracted_k141_53204   | 1122  | No | NA | 1  | 0              | Low-quality     | Genome-fragment | 2.51  | 0 |
| 59_vs_k141_81246  full     | 4676  | No | NA | 0  | 4              | Not-determined  | Genome-fragment | NA    | 0 |
| 58_extracted_k141_11309    | 1122  | No | NA | 1  | 0              | Low-quality     | Genome-fragment | 2.15  | 0 |
| 59_vs_k141_77195  full     | 2418  | No | NA | 0  | 0              | Not-determined  | Genome-fragment | NA    | 0 |
| 59_vs_k141_65934  full     | 1117  | No | NA | 0  | 0              | Not-determined  | Genome-fragment | NA    | 0 |
| 58_vs_k141_1557281  full   | 1122  | No | NA | 1  | 0              | Low-quality     | Genome-fragment | 1.14  | 0 |
| 517_vs_k141_116428  full   | 1123  | No | NA | 0  | 0              | Low-quality     | Genome-fragment | 2.97  | 0 |
| 59_vs_k141_24546  full     | 2567  | No | NA | 0  | 2              | Not-determined  | Genome-fragment | NA    | 0 |
| 517_vs_k141_109864  full   | 1123  | No | NA | 0  | 0              | Low-quality     | Genome-fragment | 1.3   | 0 |
| 511_vs_k141_22162  full    | 1123  | No | NA | 0  | 0              | Low-quality     | Genome-fragment | 2.2   | 0 |
| 59_vs_k141_9176  full      | 1601  | No | NA | 0  | 0              | Not-determined  | Genome-fragment | NA    | 0 |
| 59_vs_k141_17303  full     | 2811  | No | NA | 2  | Not-determined | Genome-fragment | NA              | 0     |   |
| 514_extracted_k141_73218   | 1123  | No | NA | 1  | 0              | Low-quality     | Genome-fragment | 1.99  | 0 |
| 59_vs_k141_88789  full     | 3032  | No | NA | 0  | 1              | Not-determined  | Genome-fragment | NA    | 0 |
| 514_vs_k141_70484  full    | 1123  | No | NA | 0  | 0              | Low-quality     | Genome-fragment | 2.58  | 0 |
| 55_vs_k141_97842  full     | 1123  | No | NA | 0  | 0              | Low-quality     | Genome-fragment | 2.81  | 0 |
| 57_extracted_92695         | 1123  | No | NA | 0  | 0              | Low-quality     | Genome-fragment | 1.44  | 0 |
| 515_vs_62041  full         | 1123  | No | NA | 1  | 0              | Low-quality     | Genome-fragment | 2.16  | 0 |
| 56_vs_k141_8983  full      | 1123  | No | NA | 0  | 1              | Low-quality     | Genome-fragment | 1.64  | 0 |
| 517_vs_k141_112893  full   | 1124  | No | NA | 0  | 2              | Low-quality     | Genome-fragment | 0.38  | 0 |
| 59_vs_k141_1966  full      | 26960 | No | NA | 17 | 1              | Medium-quality  | Genome-fragment | 75.45 | 0 |
| 59_vs_k141_58402  full     | 22074 | No | NA | 0  | 0              | Medium-quality  | Genome-fragment | 56.74 | 0 |
| 59_vs_k141_90785  full     | 1124  | No | NA | 2  | 0              | Low-quality     | Genome-fragment | 1.86  | 0 |
| 59_vs_k141_55072  full     | 1894  | No | NA | 0  | 2              | Not-determined  | Genome-fragment | NA    | 0 |
| 59_vs_k141_9250  full      | 2508  | No | NA | 0  | 2              | Not-determined  | Genome-fragment | NA    | 0 |
| 511_vs_k141_50521  H2gene  | 1124  | No | NA | 0  | 0              | Low-quality     | Genome-fragment | 1.7   | 0 |
| 59_vs_k141_36121  full     | 4057  | No | NA | 0  | 0              | Not-determined  | Genome-fragment | NA    | 0 |
| 514_vs_k141_24499  full    | 1124  | No | NA | 0  | 0              | Low-quality     | Genome-fragment | 2.39  | 0 |
| 59_vs_k141_20869  full     | 6576  | No | NA | 0  | 0              | Not-determined  | Genome-fragment | NA    | 0 |
| 51_extracted_k141_48823    | 1124  | No | NA | 0  | 0              | Low-quality     | Genome-fragment | 1.08  | 0 |
| 59_vs_k141_81370  full     | 2392  | No | NA | 0  | 2              | Not-determined  | Genome-fragment | NA    | 0 |
| 52_extracted_k141_24043    | 1124  | No | NA | 0  | 0              | Low-quality     | Genome-fragment | 0.32  | 0 |
| 59_vs_k141_36142  full     | 2166  | No | NA | 0  | 0              | Not-determined  | Genome-fragment | NA    | 0 |
| 55_extracted_k141_113719   | 1124  | No | NA | 0  | 0              | Low-quality     | Genome-fragment | 3.36  | 0 |
| 59_vs_k141_27364  full     | 25774 | No | NA | 18 | 0              | Medium-quality  | Genome-fragment | 78.08 | 0 |
| 516_vs_170524  full        | 1124  | No | NA | 0  | 0              | Low-quality     | Genome-fragment | 2.3   | 0 |
| 59_vs_k141_88847  full     | 33348 | No | NA | 9  | 0              | Medium-quality  | Genome-fragment | 88.26 | 0 |
| 516_vs_199341  H2gene      | 1124  | No | NA | 1  | 0              | Low-quality     | Genome-fragment | 3.08  | 0 |
| 510_extracted_112229       | 1124  | No | NA | 1  | 0              | Low-quality     | Genome-fragment | 1.04  | 0 |
| 512_vs_k141_21250  full    | 1124  | No | NA | 0  | 0              | Low-quality     | Genome-fragment | 1     | 0 |
| 59_vs_k141_43844  full     | 1574  | No | NA | 0  | 0              | Not-determined  | Genome-fragment | NA    | 0 |
| 59_vs_k141_36162  full     | 4153  | No | NA | 3  | Not-determined | Genome-fragment | NA              | 0     |   |
| 512_vs_k141_61261  H2gene  | 1124  | No | NA | 2  | 0              | Low-quality     | Genome-fragment | 2.76  | 0 |
| 56_vs_k141_48732  full     | 1124  | No | NA | 0  | 0              | Low-quality     | Genome-fragment | 2.37  | 0 |
| 517_extracted_k141_51822   | 1125  | No | NA | 0  | 0              | Low-quality     | Genome-fragment | 1.69  | 0 |
| 59_vs_k141_62557  full     | 1146  | No | NA | 0  | 2              | Not-determined  | Genome-fragment | NA    | 0 |
| 59_vs_k141_40115  full     | 1737  | No | NA | 0  | 1              | Not-determined  | Genome-fragment | NA    | 0 |
| 517_vs_k141_122992  full   | 1125  | No | NA | 0  | 1              | Low-quality     | Genome-fragment | 2.11  | 0 |
| 59_vs_k141_63572  full     | 2174  | No | NA | 0  | 0              | Not-determined  | Genome-fragment | NA    | 0 |
| 59_vs_k141_34976  full     | 1125  | No | NA | 1  | 0              | Low-quality     | Genome-fragment | 2.04  | 0 |
| 59_vs_k141_13377  full     | 2188  | No | NA | 0  | 1              | Not-determined  | Genome-fragment | NA    | 0 |
| 59_vs_k141_13380  full     | 1265  | No | NA | 0  | 0              | Not-determined  | Genome-fragment | NA    | 0 |
| 511_vs_k141_71841  H2gene  | 1125  | No | NA | 1  | 0              | Low-quality     | Genome-fragment | 2.76  | 0 |
| 514_vs_k141_24264  full    | 1125  | No | NA | 0  | 0              | Low-quality     | Genome-fragment | 2.14  | 0 |
| 514_vs_k141_29137  full    | 1125  | No | NA | 0  | 0              | Low-quality     | Genome-fragment | 2.63  | 0 |
| 53_extracted_k141_94321    | 1125  | No | NA | 0  | 0              | Low-quality     | Genome-fragment | 2.68  | 0 |
| 55_extracted_k141_109354   | 1125  | No | NA | 0  | 1              | Low-quality     | Genome-fragment | 0.35  | 0 |
| 55_vs_k141_17531  full     | 1125  | No | NA | 1  | 0              | Low-quality     | Genome-fragment | 2.46  | 0 |
| 57_vs_46321  full          | 1125  | No | NA | 0  | 0              | Low-quality     | Genome-fragment | 3.21  | 0 |
| 516_vs_16529  full         | 1125  | No | NA | 0  | 0              | Low-quality     | Genome-fragment | 2.25  | 0 |
| 59_vs_k141_3442  full      | 1218  | No | NA | 0  | 1              | Not-determined  | Genome-fragment | NA    | 0 |
| 516_vs_158800  full        | 1125  | No | NA | 0  | 0              | Low-quality     | Genome-fragment | 2.68  | 0 |
| 59_vs_k141_58596  full     | 1859  | No | NA | 0  | 1              | Not-determined  | Genome-fragment | NA    | 0 |
| 510_extracted_41297        | 1125  | No | NA | 0  | 0              | Low-quality     | Genome-fragment | 2.51  | 0 |
| 510_vs_2314  H2gene        | 1125  | No | NA | 0  | 0              | Low-quality     | Genome-fragment | 2.46  | 0 |
| 56_vs_k141_13941  full     | 1125  | No | NA | 2  | 0              | Low-quality     | Genome-fragment | 2.61  | 0 |
| 517_vs_k141_111698  full   | 1126  | No | NA | 0  | 1              | Low-quality     | Genome-fragment | 0.87  | 0 |
| 59_vs_k141_88997  full     | 2085  | No | NA | 0  | 2              | Not-determined  | Genome-fragment | NA    | 0 |
| 517_vs_k141_151045  H2gene | 1126  | No | NA | 0  | 0              | Low-quality     | Genome-fragment | 2.97  | 0 |
| 511_vs_k141_95814  full    | 1126  | No | NA | 1  | 0              | Low-quality     | Genome-fragment | 2.71  | 0 |
| 59_vs_k141_66152  full     | 3204  | No | NA | 0  | 1              | Not-determined  | Genome-fragment | NA    | 0 |
| 59_vs_k141_17578  full     | 1803  | No | NA | 0  | 0              | Not-determined  | Genome-fragment | NA    | 0 |
| 513_vs_138363  full        | 1126  | No | NA | 0  | 0              | Low-quality     | Genome-fragment | 1.33  | 0 |
| 59_vs_k141_13487  full     | 1165  | No | NA | 0  | 0              | Not-determined  | Genome-fragment | NA    | 0 |
| 59_vs_k141_36290  full     | 1556  | No | NA | 0  | 0              | Not-determined  | Genome-fragment | NA    | 0 |
| 514_vs_k141_30519  full    | 1126  | No | NA | 1  | 0              | Low-quality     | Genome-fragment | 1.8   | 0 |
| 59_vs_k141_28749  full     | 2895  | No | NA | 0  | 3              | Not-determined  | Genome-fragment | NA    | 0 |
| 59_vs_k141_3508  full      | 1852  | No | NA | 0  | 2              | Not-determined  | Genome-fragment | NA    | 0 |
| 51_vs_k141_12021  full     | 1126  | No | NA | 0  | 0              | Low-quality     | Genome-fragment | 2.94  | 0 |
| 59_vs_k141_21058  full     | 1246  | No | NA | 0  | 1              | Not-determined  | Genome-fragment | NA    | 0 |
| 59_vs_k141_25356  full     | 1126  | No | NA | 2  | 0              | Low-quality     | Genome-fragment | 0.86  | 0 |
| 53_vs_k141_7140  full      | 1126  | No | NA | 0  | 0              | Low-quality     | Genome-fragment | 2.54  | 0 |
| 55_extracted_k141_12803    | 1126  | No | NA | 0  | 0              | Low-quality     | Genome-fragment | 2.95  | 0 |
| 59_vs_k141_12588  full     | 54215 | No | NA | 27 | 1              | Medium-quality  | Genome-fragment | 84.63 | 0 |
| 55_vs_k141_138904  full    | 1126  | No | NA | 0  | 0              | Low-quality     | Genome-fragment | 1.95  | 0 |
| 516_vs_141421  H2gene      | 1126  | No | NA | 1  | 0              | Low-quality     | Genome-fragment | 3.23  | 0 |
| 59_vs_k141_81572  full     | 1019  | No | NA | 0  | 1              | Not-determined  | Genome-fragment | NA    | 0 |
| 512_vs_k141_142803  full   | 1126  | No | NA | 0  | 0              | Low-quality     | Genome-fragment | 1.65  | 0 |
| 59_vs_k141_41033  full     | 2280  | No | NA | 0  | 0              | Not-determined  | Genome-fragment | NA    | 0 |
| 59_vs_k141_89083  full     | 7414  | No | NA | 0  | 4              | Not-determined  | Genome-fragment | NA    | 0 |
| 59_vs_k141_36392  full     | 5703  | No | NA | 0  | 2              | Not-determined  | Genome-fragment | NA    | 0 |
| 59_vs_k141_2231  full      | 1421  | No | NA | 0  | 1              | Not-determined  | Genome-fragment | NA    | 0 |
| 512_vs_k141_168638  full   | 1126  | No | NA | 0  | 0              | Low-quality     | Genome-fragment | 3.07  | 0 |
| 59_vs_k141_2235  full      | 1239  | No | NA | 0  | 2              | Not-determined  | Genome-fragment | NA    | 0 |
| 59_vs_k141_62746  full     | 4484  | No | NA | 2  | Not-determined | Genome-fragment | NA              | 0     |   |
| 54_extracted_8746          | 1126  | No | NA | 0  | 0              | Low-quality     | Genome-fragment | 2.9   | 0 |
| 59_vs_k141_81633  full     | 1762  | No | NA | 0  | 2              | Not-determined  | Genome-fragment | NA    | 0 |
| 58_vs_k141_20210  full     | 1126  | No | NA | 2  | 0              | Low-quality     | Genome-fragment | 3.28  | 0 |
| 517_extracted_k141_52658   | 1127  | No | NA | 0  | 0              | Low-quality     | Genome-fragment | 3.61  | 0 |
| 517_vs_k141_13519  full    | 1127  | No | NA | 0  | 0              | Low-quality     | Genome-fragment | 2.52  | 0 |
| 59_vs_k141_8020  full      | 1127  | No | NA | 0  | 0              | Low-quality     | Genome-fragment | 1.34  | 0 |
| 59_vs_k141_73990  full     | 2245  | No | NA | 0  | 2              | Not-determined  | Genome-fragment | NA    | 0 |
| 511_extracted_k141_87614   | 1127  | No | NA | 0  | 0              | Low-quality     | Genome-fragment | 1.86  | 0 |
| 59_vs_k141_81527  full     | 1760  | No | NA | 0  | 0              | Not-determined  | Genome-fragment | NA    | 0 |
| 511_vs_k141_9702  full     | 1127  | No | NA | 0  | 0              | Low-quality     | Genome-fragment | 3.3   | 0 |
| 51_extracted_k141_113854   | 1127  | No | NA | 1  | 0              | Low-quality     | Genome-fragment | 1.75  | 0 |
| 59_vs_k141_9612  full      | 1504  | No | NA | 0  | 0              | Not-determined  | Genome-fragment | NA    | 0 |
| 51_extracted_k141_25703    | 1127  | No | NA | 0  | 0              | Low-quality     | Genome-fragment | 0.56  | 0 |
| 59_vs_k141_40397  full     | 2863  | No | NA | 0  | 0              | Not-determined  | Genome-fragment | NA    | 0 |
| 51_extracted_k141_30075    | 1127  | No | NA | 0  | 0              | Low-quality     | Genome-fragment | 1.91  | 0 |
| 51_extracted_k141_106666   | 1127  | No | NA | 0  | 0              | Low-quality     | Genome-fragment | 2.38  | 0 |
| 53_extracted_k141_102509   | 1127  | No | NA | 1  | 0              | Low-quality     | Genome-fragment | 0.44  | 0 |
| 55_vs_k141_142054  full    | 1127  | No | NA | 2  | 0              | Low-quality     | Genome-fragment | 3.71  | 0 |
| 55_vs_k141_12373  H2gene   | 1127  | No | NA | 2  | 0              | Low-quality     | Genome-fragment | 1.92  | 0 |
| 57_vs_8367  full           | 1127  | No | NA | 0  | 1              | Low-quality     | Genome-fragment | 0.37  | 0 |
| 516_vs_50226  H2gene       | 1127  | No | NA | 1  | 0              | Low-quality     | Genome-fragment | 0.7   | 0 |
| 512_vs_k141_116123  full   | 1127  | No | NA | 0  | 0              | Low-quality     | Genome-fragment | 2.47  | 0 |
| 512_vs_k141_155768  full   | 1127  | No | NA | 1  | 0              | Low-quality     | Genome-fragment | 2.45  | 0 |
| 59_vs_k141_21276  full     | 6754  | No | NA | 0  | 0              | Not-determined  | Genome-fragment | NA    | 0 |
| 59_vs_k141_2346  full      | 1720  | No | NA | 0  | 0              | Not-determined  | Genome-fragment | NA    | 0 |
| 512_vs_k141_152501  full   | 1127  | No | NA | 2  | 0              | Low-quality     | Genome-fragment | 2.43  | 0 |
| 59_vs_k141_18986  full     | 5065  | No | NA | 0  | 0              | Not-determined  | Genome-fragment | NA    | 0 |
| 517_vs_k141_17             |       |    |    |    |                |                 |                 |       |   |



|                            |       |    |    |    |                |                 |                 |       |   |
|----------------------------|-------|----|----|----|----------------|-----------------|-----------------|-------|---|
| S11_vs_k141_33782   2gene  | 1129  | No | NA | 1  | 0              | Low-quality     | Genome-fragment | 3.49  | 0 |
| S14_extracted_k141_14036   | 1129  | No | NA | 0  | 0              | Low-quality     | Genome-fragment | 1.71  | 0 |
| S1_extracted_k141_28410    | 1129  | No | NA | 0  | 0              | Low-quality     | Genome-fragment | 2.03  | 0 |
| S9_vs_k141_55518   full    | 4802  | No | NA | 0  | 4              | Not-determined  | Genome-fragment | NA    | 0 |
| S9_vs_k141_6463   full     | 1371  | No | NA | 0  | 1              | Not-determined  | Genome-fragment | NA    | 0 |
| S9_vs_k141_17579   full    | 1799  | No | NA | 0  | 2              | Not-determined  | Genome-fragment | NA    | 0 |
| S9_vs_k141_85472   full    | 1704  | No | NA | 0  | 2              | Not-determined  | Genome-fragment | NA    | 0 |
| S1_vs_k141_157935   2gene  | 1129  | No | NA | 1  | 0              | Low-quality     | Genome-fragment | 2.84  | 0 |
| S9_vs_k141_55540   full    | 2265  | No | NA | 0  | 2              | Not-determined  | Genome-fragment | NA    | 0 |
| S9_vs_k141_74227   full    | 6647  | No | NA | 0  | 3              | Not-determined  | Genome-fragment | NA    | 0 |
| S3_extracted_k141_97477    | 1129  | No | NA | 1  | 0              | Low-quality     | Genome-fragment | 1.87  | 0 |
| S5_extracted_k141_122939   | 1129  | No | NA | 0  | 0              | Low-quality     | Genome-fragment | 2.13  | 0 |
| S5_vs_k141_19878   full    | 1129  | No | NA | 0  | 1              | Low-quality     | Genome-fragment | 1.72  | 0 |
| S9_vs_k141_32768   full    | 2613  | No | NA | 0  | 0              | Not-determined  | Genome-fragment | NA    | 0 |
| S9_vs_k141_44331   full    | 29758 | No | NA | 18 | 1              | Medium-quality  | Genome-fragment | 71.77 | 0 |
| S5_vs_k141_51431   full    | 1129  | No | NA | 0  | 0              | Low-quality     | Genome-fragment | 2.37  | 0 |
| S16_vs_131016   2gene      | 1129  | No | NA | 0  | 0              | Low-quality     | Genome-fragment | 2.67  | 0 |
| S10_vs_65988   full        | 1129  | No | NA | 0  | 1              | Low-quality     | Genome-fragment | 2.76  | 0 |
| S9_vs_k141_17604   full    | 1279  | No | NA | 0  | 0              | Not-determined  | Genome-fragment | NA    | 0 |
| S10_vs_633   2gene         | 1129  | No | NA | 1  | 0              | Low-quality     | Genome-fragment | 2.04  | 0 |
| S10_vs_45215   2gene       | 1129  | No | NA | 1  | 0              | Low-quality     | Genome-fragment | 2.62  | 0 |
| S12_vs_k141_88623   full   | 1129  | No | NA | 0  | 0              | Low-quality     | Genome-fragment | 2.62  | 0 |
| S12_vs_k141_94397   2gene  | 1129  | No | NA | 1  | 0              | Low-quality     | Genome-fragment | 1.23  | 0 |
| S15_vs_75206   full        | 1129  | No | NA | 1  | 0              | Low-quality     | Genome-fragment | 3.87  | 0 |
| S8_vs_k141_104888   full   | 1129  | No | NA | 1  | 0              | Low-quality     | Genome-fragment | 1.39  | 0 |
| S8_vs_k141_53129   2gene   | 1129  | No | NA | 1  | 0              | Low-quality     | Genome-fragment | 2.93  | 0 |
| S9_extracted_k141_86591    | 1130  | No | NA | 2  | 0              | Low-quality     | Genome-fragment | 3.73  | 0 |
| S13_extracted_32821        | 1130  | No | NA | 0  | 1              | Low-quality     | Genome-fragment | 1.91  | 0 |
| S9_vs_k141_50979   full    | 1788  | No | NA | 2  | Not-determined | Genome-fragment | NA              | 0     |   |
| S9_vs_k141_40606   full    | 1481  | No | NA | 0  | 4              | Not-determined  | Genome-fragment | NA    | 0 |
| S9_vs_k141_17865   full    | 8606  | No | NA | 0  | 6              | Not-determined  | Genome-fragment | NA    | 0 |
| S9_vs_k141_17619   full    | 3496  | No | NA | 0  | 4              | Not-determined  | Genome-fragment | NA    | 0 |
| S9_vs_k141_59008   full    | 1502  | No | NA | 0  | 2              | Not-determined  | Genome-fragment | NA    | 0 |
| S9_vs_k141_29176   full    | 2685  | No | NA | 0  | 3              | Not-determined  | Genome-fragment | NA    | 0 |
| S13_vs_123526   full       | 1130  | No | NA | 2  | 0              | Low-quality     | Genome-fragment | 2.4   | 0 |
| S9_vs_k141_89205   full    | 2853  | No | NA | 2  | Not-determined | Genome-fragment | NA              | 0     |   |
| S9_vs_k141_77658   full    | 9388  | No | NA | 0  | 1              | Not-determined  | Genome-fragment | NA    | 0 |
| S9_vs_k141_47631   full    | 1754  | No | NA | 0  | 0              | Not-determined  | Genome-fragment | NA    | 0 |
| S5_vs_k141_5904   full     | 1130  | No | NA | 0  | 0              | Low-quality     | Genome-fragment | 2.55  | 0 |
| S9_vs_k141_9939   full     | 1994  | No | NA | 0  | 1              | Not-determined  | Genome-fragment | NA    | 0 |
| S9_vs_k141_74250   full    | 1012  | No | NA | 0  | 1              | Not-determined  | Genome-fragment | NA    | 0 |
| S7_vs_25320   full         | 1130  | No | NA | 0  | 1              | Low-quality     | Genome-fragment | 2.33  | 0 |
| S9_vs_k141_47634   full    | 1683  | No | NA | 0  | 0              | Not-determined  | Genome-fragment | NA    | 0 |
| S2_vs_k141_18296   full    | 1130  | No | NA | 1  | 0              | Low-quality     | Genome-fragment | 1.11  | 0 |
| S9_vs_k141_2600   full     | 3220  | No | NA | 0  | 1              | Not-determined  | Genome-fragment | NA    | 0 |
| S2_vs_k141_17325   full    | 1130  | No | NA | 0  | 0              | Low-quality     | Genome-fragment | 2.11  | 0 |
| S9_vs_k141_74262   full    | 1019  | No | NA | 0  | 0              | Not-determined  | Genome-fragment | NA    | 0 |
| S9_vs_k141_85541   full    | 9159  | No | NA | 0  | 9              | Not-determined  | Genome-fragment | NA    | 0 |
| S8_extracted_k141_47836    | 1130  | No | NA | 0  | 1              | Low-quality     | Genome-fragment | 1.61  | 0 |
| S8_vs_k141_96104   full    | 1130  | No | NA | 0  | 1              | Low-quality     | Genome-fragment | 3.48  | 0 |
| S9_vs_k141_44434   full    | 1117  | No | NA | 0  | 0              | Not-determined  | Genome-fragment | NA    | 0 |
| S9_vs_k141_70504   2gene   | 1121  | No | NA | 0  | 0              | Low-quality     | Genome-fragment | 2.6   | 0 |
| S9_vs_k141_81934   full    | 3894  | No | NA | 0  | 4              | Not-determined  | Genome-fragment | NA    | 0 |
| S9_vs_k141_67723   2gene   | 1131  | No | NA | 1  | 0              | Low-quality     | Genome-fragment | 1.78  | 0 |
| S11_vs_k141_59520   full   | 1131  | No | NA | 1  | 0              | Low-quality     | Genome-fragment | 2.01  | 0 |
| S9_vs_k141_17848   full    | 1377  | No | NA | 0  | 1              | Not-determined  | Genome-fragment | NA    | 0 |
| S9_vs_k141_10015   full    | 1215  | No | NA | 0  | 0              | Not-determined  | Genome-fragment | NA    | 0 |
| S9_vs_k141_59105   full    | 3512  | No | NA | 0  | 2              | Not-determined  | Genome-fragment | NA    | 0 |
| S11_vs_k141_58851   2gene  | 1131  | No | NA | 0  | 0              | Low-quality     | Genome-fragment | 1.99  | 0 |
| S9_vs_k141_13727   full    | 1944  | No | NA | 0  | 2              | Not-determined  | Genome-fragment | NA    | 0 |
| S9_vs_k141_14336   full    | 1776  | No | NA | 0  | 1              | Not-determined  | Genome-fragment | NA    | 0 |
| S13_extracted_69943        | 1131  | No | NA | 0  | 1              | Low-quality     | Genome-fragment | 0.54  | 0 |
| S3_vs_k141_90406   full    | 1131  | No | NA | 0  | 0              | Low-quality     | Genome-fragment | 2.56  | 0 |
| S5_extracted_k141_117369   | 1131  | No | NA | 2  | 0              | Low-quality     | Genome-fragment | 5.16  | 0 |
| S5_vs_k141_141546   full   | 1131  | No | NA | 0  | 0              | Low-quality     | Genome-fragment | 0.65  | 0 |
| S9_vs_k141_32888   full    | 4622  | No | NA | 0  | 2              | Not-determined  | Genome-fragment | NA    | 0 |
| S9_vs_k141_10064   full    | 1191  | No | NA | 0  | 1              | Not-determined  | Genome-fragment | NA    | 0 |
| S9_vs_k141_17983   full    | 1848  | No | NA | 0  | 0              | Not-determined  | Genome-fragment | NA    | 0 |
| S5_vs_k141_1366   full     | 1131  | No | NA | 0  | 1              | Low-quality     | Genome-fragment | 2.57  | 0 |
| S5_vs_k141_22754   2gene   | 1131  | No | NA | 1  | 0              | Low-quality     | Genome-fragment | 0.65  | 0 |
| S16_extracted_51965        | 1131  | No | NA | 0  | 0              | Low-quality     | Genome-fragment | 1.04  | 0 |
| S12_vs_k141_21171   2gene  | 1131  | No | NA | 0  | 0              | Low-quality     | Genome-fragment | 1.37  | 0 |
| S6_extracted_k141_45552    | 1131  | No | NA | 1  | 0              | Low-quality     | Genome-fragment | 2.51  | 0 |
| S8_extracted_k141_18075    | 1131  | No | NA | 0  | 0              | Low-quality     | Genome-fragment | 2.98  | 0 |
| S8_extracted_k141_54877    | 1131  | No | NA | 0  | 0              | Low-quality     | Genome-fragment | 2.13  | 0 |
| S8_extracted_k141_136583   | 1131  | No | NA | 0  | 0              | Low-quality     | Genome-fragment | 1.76  | 0 |
| S9_vs_k141_32919   full    | 1773  | No | NA | 0  | 1              | Not-determined  | Genome-fragment | NA    | 0 |
| S9_vs_k141_10348   full    | 2120  | No | NA | 0  | 0              | Not-determined  | Genome-fragment | NA    | 0 |
| S9_vs_k141_61089   full    | 1811  | No | NA | 0  | 0              | Not-determined  | Genome-fragment | NA    | 0 |
| S8_extracted_k141_68324    | 1131  | No | NA | 0  | 0              | Low-quality     | Genome-fragment | 2.33  | 0 |
| S9_vs_k141_66615   full    | 1560  | No | NA | 0  | 1              | Not-determined  | Genome-fragment | NA    | 0 |
| S8_vs_k141_2151   full     | 1131  | No | NA | 0  | 0              | Low-quality     | Genome-fragment | 1.78  | 0 |
| S9_vs_k141_18020   full    | 1251  | No | NA | 0  | 0              | Not-determined  | Genome-fragment | NA    | 0 |
| S9_vs_k141_29319   full    | 1397  | No | NA | 0  | 0              | Not-determined  | Genome-fragment | NA    | 0 |
| S17_extracted_k141_16774   | 1132  | No | NA | 0  | 0              | Low-quality     | Genome-fragment | 2.7   | 0 |
| S17_extracted_k141_83384   | 1132  | No | NA | 0  | 0              | Low-quality     | Genome-fragment | 0.92  | 0 |
| S9_vs_k141_89328   full    | 1543  | No | NA | 0  | 0              | Not-determined  | Genome-fragment | NA    | 0 |
| S17_extracted_k141_113570  | 1132  | No | NA | 0  | 1              | Low-quality     | Genome-fragment | 0.5   | 0 |
| S17_vs_k141_125948   2gene | 1132  | No | NA | 0  | 0              | Low-quality     | Genome-fragment | 3.08  | 0 |
| S9_vs_k141_10117   full    | 1303  | No | NA | 0  | 0              | Not-determined  | Genome-fragment | NA    | 0 |
| S9_vs_k141_2713   full     | 1212  | No | NA | 0  | 5              | Not-determined  | Genome-fragment | NA    | 0 |
| S9_vs_k141_10116   full    | 1021  | No | NA | 0  | 1              | Not-determined  | Genome-fragment | NA    | 0 |
| S9_vs_k141_21713   full    | 2116  | No | NA | 0  | 2              | Not-determined  | Genome-fragment | NA    | 0 |
| S9_vs_k141_18242   full    | 1070  | No | NA | 0  | 0              | Not-determined  | Genome-fragment | NA    | 0 |
| S9_vs_k141_61227   full    | 5787  | No | NA | 0  | 3              | Not-determined  | Genome-fragment | NA    | 0 |
| S11_vs_k141_69975   2gene  | 1132  | No | NA | 1  | 0              | Low-quality     | Genome-fragment | 1.98  | 0 |
| S9_vs_k141_77830   full    | 8617  | No | NA | 0  | 2              | Not-determined  | Genome-fragment | NA    | 0 |
| S14_extracted_k141_103280  | 1132  | No | NA | 3  | 0              | Low-quality     | Genome-fragment | 2.83  | 0 |
| S9_vs_k141_57738   full    | 43096 | No | NA | 18 | 1              | Medium-quality  | Genome-fragment | 80.9  | 0 |
| S9_vs_k141_6555   full     | 1165  | No | NA | 0  | 0              | Not-determined  | Genome-fragment | NA    | 0 |
| S9_vs_k141_17844   full    | 1912  | No | NA | 0  | 1              | Not-determined  | Genome-fragment | NA    | 0 |
| S14_vs_k141_10431   full   | 1132  | No | NA | 0  | 0              | Low-quality     | Genome-fragment | 2.19  | 0 |
| S1_vs_k141_77820   full    | 1132  | No | NA | 0  | 0              | Low-quality     | Genome-fragment | 4.5   | 0 |
| S1_vs_k141_15683   full    | 1132  | No | NA | 0  | 0              | Low-quality     | Genome-fragment | 0.78  | 0 |
| S7_vs_126972   2gene       | 1132  | No | NA | 0  | 0              | Low-quality     | Genome-fragment | 3.3   | 0 |
| S16_vs_58698   full        | 1132  | No | NA | 0  | 0              | Low-quality     | Genome-fragment | 1.21  | 0 |
| S16_vs_153118   full       | 1132  | No | NA | 1  | 0              | Low-quality     | Genome-fragment | 2.45  | 0 |
| S9_extracted_k141_79258    | 1133  | No | NA | 0  | 1              | Low-quality     | Genome-fragment | 1.55  | 0 |
| S9_vs_k141_18113   full    | 1814  | No | NA | 0  | 3              | Not-determined  | Genome-fragment | NA    | 0 |
| S9_vs_k141_88150   2gene   | 1133  | No | NA | 1  | 0              | Low-quality     | Genome-fragment | 3.15  | 0 |
| S11_extracted_k141_5403    | 1133  | No | NA | 0  | 0              | Low-quality     | Genome-fragment | 3.89  | 0 |
| S9_vs_k141_11880   full    | 2243  | No | NA | 0  | 2              | Not-determined  | Genome-fragment | NA    | 0 |
| S13_vs_81330   full        | 1133  | No | NA | 1  | 0              | Low-quality     | Genome-fragment | 1.94  | 0 |
| S9_vs_k141_37010   full    | 1330  | No | NA | 0  | 0              | Not-determined  | Genome-fragment | NA    | 0 |
| S9_vs_k141_17813   full    | 2961  | No | NA | 0  | 2              | Not-determined  | Genome-fragment | NA    | 0 |
| S3_extracted_k141_104139   | 1133  | No | NA | 1  | 0              | Low-quality     | Genome-fragment | 3.35  | 0 |
| S3_vs_k141_110177   full   | 1133  | No | NA | 0  | 0              | Low-quality     | Genome-fragment | 3.22  | 0 |
| S5_extracted_k141_20921    | 1133  | No | NA | 0  | 0              | Low-quality     | Genome-fragment | 0.91  | 0 |
| S5_vs_k141_117424   full   | 1133  | No | NA | 0  | 1              | Low-quality     | Genome-fragment | 2.51  | 0 |
| S9_vs_k141_6633   full     | 1443  | No | NA | 0  | 0              | Not-determined  | Genome-fragment | NA    | 0 |
| S5_vs_k141_84609   full    | 1133  | No | NA | 1  | 0              | Low-quality     | Genome-fragment | 2.22  | 0 |
| S12_vs_k141_2706   full    | 1133  | No | NA | 0  | 0              | Low-quality     | Genome-fragment | 3.04  | 0 |
| S9_vs_k141_21806   full    | 1579  | No | NA | 0  | 1              | Not-determined  | Genome-fragment | NA    | 0 |
| S12_vs_k141_23078   full   | 1133  | No | NA | 0  | 0              | Low-quality     | Genome-fragment | 1.78  | 0 |
| S15_vs_69294   full        | 1133  | No | NA | 0  | 1              | Low-quality     | Genome-fragment | 3.61  | 0 |
| S8_vs_k141_187155   full   | 1133  | No | NA | 1  | 0              | Low-quality     | Genome-fragment | 2.28  | 0 |
| S9_vs_k141_10243   full    | 2339  | No | NA | 0  | 0              | Not-determined  | Genome-fragment | NA    | 0 |
| S9_vs_k141_10246   full    | 2410  | No | NA | 0  | 3              | Not-determined  | Genome-fragment | NA    | 0 |
| S17_extracted_k141_91804   | 1134  | No | NA | 0  | 0              | Low-quality     | Genome-fragment | 2.02  | 0 |
| S9_extracted_k141_61570    | 1134  | No | NA | 3  | 0              | Low-quality     | Genome-fragment | 3.74  | 0 |
| S9_vs_k141_11515   full    | 1134  | No | NA | 1  | 0              | Low-quality     | Genome-fragment | 2.18  | 0 |
| S9_vs_k141_40767   full    | 2151  | No | NA | 0  | 0              | Not-determined  | Genome-fragment | NA    | 0 |
| S9_vs_k141_21848   full    | 1596  | No | NA | 0  | 0              | Not-determined  | Genome-fragment | NA    | 0 |
| S9_vs_k141_44251   full    | 1134  | No | NA | 0  | 0              | Low-quality     | Genome-fragment | 2.87  | 0 |
| S9_vs_k141_13105   full    | 1163  | No | NA | 0  | 0              | Not-determined  | Genome-fragment | NA    | 0 |
| S13_vs_34092   full        | 1134  | No | NA | 2  | 0              | Low-quality     | Genome-fragment | 2.78  | 0 |
| S9_vs_k141_40778   full    | 1502  | No | NA | 0  | 0              | Not-determined  | Genome-fragment | NA    | 0 |
| S9_vs_k141_13115   full    | 1258  | No | NA | 0  | 2              | Not-determined  | Genome-fragment | NA    | 0 |
| S9_vs_k141_63264   full    | 1475  | No | NA | 0  | 1              | Not-determined  | Genome-fragment | NA    | 0 |
| S1_vs_k141_121762   full   | 1134  | No | NA | 0  | 0              | Low-quality     | Genome-fragment | 2.48  | 0 |
| S1_vs_k141_154910   2gene  | 1134  | No | NA | 1  | 0              | Low-quality     | Genome-fragment | 1.76  | 0 |
| S3_vs_k141_19074   full    | 1134  | No | NA | 0  | 0              | Low-quality     | Genome-fragment | 2.7   | 0 |
| S9_vs_k141_2799   full     | 60546 | No | NA | 3  | 33             | High            |                 |       |   |



|                           |       |    |    |    |   |                |                 |       |   |
|---------------------------|-------|----|----|----|---|----------------|-----------------|-------|---|
| S17_vs_k141_100148  full  | 1136  | No | NA | 2  | 0 | Low-quality    | Genome-fragment | 2.74  | 0 |
| S17_vs_k141_20204  full   | 1136  | No | NA | 1  | 0 | Low-quality    | Genome-fragment | 1.16  | 0 |
| S11_vs_k141_23751  full   | 1136  | No | NA | 0  | 0 | Low-quality    | Genome-fragment | 3.3   | 0 |
| S9_vs_k141_44770  full    | 1446  | No | NA | 0  | 1 | Not-determined | Genome-fragment | NA    | 0 |
| S9_vs_k141_48067  full    | 1514  | No | NA | 0  | 2 | Not-determined | Genome-fragment | NA    | 0 |
| S9_vs_k141_17181  full    | 1543  | No | NA | 1  | 2 | Not-determined | Genome-fragment | NA    | 0 |
| S9_vs_k141_29653  full    | 2771  | No | NA | 0  | 1 | Not-determined | Genome-fragment | NA    | 0 |
| S9_vs_k141_5941  full     | 2227  | No | NA | 0  | 3 | Not-determined | Genome-fragment | NA    | 0 |
| S13_extracted_149942      | 1136  | No | NA | 1  | 1 | Low-quality    | Genome-fragment | 2.57  | 0 |
| S9_vs_k141_10424  full    | 23985 | No | NA | 5  | 3 | Medium-quality | Genome-fragment | 56.13 | 0 |
| S9_vs_k141_48082  full    | 1592  | No | NA | 0  | 2 | Not-determined | Genome-fragment | NA    | 0 |
| S9_vs_k141_27200  full    | 7178  | No | NA | 0  | 4 | Not-determined | Genome-fragment | NA    | 0 |
| S9_vs_k141_40959  full    | 1827  | No | NA | 0  | 0 | Not-determined | Genome-fragment | NA    | 0 |
| S9_vs_k141_2970  full     | 2323  | No | NA | 0  | 2 | Not-determined | Genome-fragment | NA    | 0 |
| S13_vs_136909  full       | 1136  | No | NA | 0  | 1 | Low-quality    | Genome-fragment | 0.87  | 0 |
| S1_vs_k141_10864  full    | 1136  | No | NA | 1  | 0 | Low-quality    | Genome-fragment | 2.08  | 0 |
| S3_extracted_k141_13677   | 1136  | No | NA | 0  | 0 | Low-quality    | Genome-fragment | 1.9   | 0 |
| S5_vs_k141_92314  full    | 1136  | No | NA | 0  | 0 | Low-quality    | Genome-fragment | 2.25  | 0 |
| S5_vs_k141_25687  full    | 1136  | No | NA | 0  | 0 | Low-quality    | Genome-fragment | 2.11  | 0 |
| S7_vs_118689  full        | 1136  | No | NA | 0  | 0 | Low-quality    | Genome-fragment | 2.65  | 0 |
| S9_vs_vs_k141_25699  full | 4342  | No | NA | 0  | 1 | Not-determined | Genome-fragment | NA    | 0 |
| S7_vs_122559  full        | 1136  | No | NA | 0  | 0 | Low-quality    | Genome-fragment | 2.44  | 0 |
| S9_vs_k141_40992  full    | 1427  | No | NA | 0  | 0 | Not-determined | Genome-fragment | NA    | 0 |
| S9_vs_k141_33375  full    | 2614  | No | NA | 0  | 0 | Not-determined | Genome-fragment | NA    | 0 |
| S9_vs_k141_56047  full    | 1618  | No | NA | 0  | 3 | Not-determined | Genome-fragment | NA    | 0 |
| S9_vs_k141_51348  full    | 1318  | No | NA | 0  | 1 | Not-determined | Genome-fragment | NA    | 0 |
| S16_extracted_60206       | 1136  | No | NA | 1  | 0 | Low-quality    | Genome-fragment | 2.95  | 0 |
| S10_extracted_44082       | 1136  | No | NA | 0  | 1 | Low-quality    | Genome-fragment | 0.73  | 0 |
| S10_vs_116664  full       | 1136  | No | NA | 0  | 0 | Low-quality    | Genome-fragment | 2.09  | 0 |
| S9_vs_k141_22020  full    | 1592  | No | NA | 1  | 1 | Not-determined | Genome-fragment | NA    | 0 |
| S17_extracted_k141_173374 | 1137  | No | NA | 0  | 1 | Low-quality    | Genome-fragment | 0.49  | 0 |
| S9_vs_k141_79949  H2gene  | 1137  | No | NA | 0  | 0 | Low-quality    | Genome-fragment | 2.64  | 0 |
| S9_vs_k141_89698  full    | 1683  | No | NA | 0  | 2 | Not-determined | Genome-fragment | NA    | 0 |
| S9_vs_k141_41007  full    | 2345  | No | NA | 1  | 0 | Not-determined | Genome-fragment | NA    | 0 |
| S1_extracted_k141_92214   | 1137  | No | NA | 0  | 1 | Low-quality    | Genome-fragment | 6.77  | 0 |
| S9_vs_k141_41009  full    | 5818  | No | NA | 0  | 1 | Not-determined | Genome-fragment | NA    | 0 |
| S9_vs_k141_56089  full    | 2615  | No | NA | 0  | 2 | Not-determined | Genome-fragment | NA    | 0 |
| S3_extracted_k141_106306  | 1137  | No | NA | 0  | 1 | Low-quality    | Genome-fragment | 0.5   | 0 |
| S9_vs_k141_59549  full    | 1510  | No | NA | 0  | 1 | Not-determined | Genome-fragment | NA    | 0 |
| S9_vs_k141_18424  full    | 1805  | No | NA | 0  | 1 | Not-determined | Genome-fragment | NA    | 0 |
| S3_extracted_k141_71125   | 1137  | No | NA | 0  | 1 | Low-quality    | Genome-fragment | 0.65  | 0 |
| S9_vs_k141_74653  full    | 1985  | No | NA | 0  | 2 | Not-determined | Genome-fragment | NA    | 0 |
| S9_vs_k141_63485  full    | 37897 | No | NA | 22 | 2 | High-quality   | High-quality    | 93.66 | 0 |
| S3_vs_k141_3351  H2gene   | 1137  | No | NA | 1  | 0 | Low-quality    | Genome-fragment | 2.66  | 0 |
| S3_vs_k141_44483  H2gene  | 1137  | No | NA | 1  | 0 | Low-quality    | Genome-fragment | 1.79  | 0 |
| S9_vs_k141_37315  full    | 3807  | No | NA | 0  | 0 | Not-determined | Genome-fragment | NA    | 0 |
| S9_vs_k141_22070  full    | 3659  | No | NA | 0  | 1 | Not-determined | Genome-fragment | NA    | 0 |
| S9_vs_k141_47052  full    | 1923  | No | NA | 0  | 0 | Not-determined | Genome-fragment | NA    | 0 |
| S9_vs_k141_25816  full    | 6412  | No | NA | 0  | 0 | Not-determined | Genome-fragment | NA    | 0 |
| S9_vs_k141_14089  full    | 2051  | No | NA | 0  | 0 | Not-determined | Genome-fragment | NA    | 0 |
| S9_vs_k141_33457  full    | 1798  | No | NA | 0  | 1 | Not-determined | Genome-fragment | NA    | 0 |
| S9_vs_k141_67059  full    | 2275  | No | NA | 0  | 1 | Not-determined | Genome-fragment | NA    | 0 |
| S5_extracted_k141_33956   | 1137  | No | NA | 1  | 0 | Low-quality    | Genome-fragment | 3.53  | 0 |
| S9_vs_k141_56154  full    | 1360  | No | NA | 0  | 1 | Not-determined | Genome-fragment | NA    | 0 |
| S9_vs_k141_14098  full    | 3743  | No | NA | 0  | 0 | Not-determined | Genome-fragment | NA    | 0 |
| S9_vs_k141_74705  full    | 1095  | No | NA | 0  | 0 | Not-determined | Genome-fragment | NA    | 0 |
| S9_vs_k141_89776  full    | 4216  | No | NA | 0  | 1 | Not-determined | Genome-fragment | NA    | 0 |
| S5_vs_k141_32278  full    | 1137  | No | NA | 0  | 0 | Low-quality    | Genome-fragment | 2.43  | 0 |
| S7_extracted_25528        | 1137  | No | NA | 0  | 0 | Low-quality    | Genome-fragment | 3.11  | 0 |
| S7_vs_53135  full         | 1137  | No | NA | 0  | 0 | Low-quality    | Genome-fragment | 1.91  | 0 |
| S10_vs_52426  full        | 1137  | No | NA | 0  | 0 | Low-quality    | Genome-fragment | 2.86  | 0 |
| S12_extracted_k141_122323 | 1137  | No | NA | 1  | 1 | Low-quality    | Genome-fragment | 1.23  | 0 |
| S9_vs_k141_25853  full    | 2102  | No | NA | 0  | 1 | Not-determined | Genome-fragment | NA    | 0 |
| S9_vs_k141_70838  full    | 4529  | No | NA | 0  | 2 | Not-determined | Genome-fragment | NA    | 0 |
| S9_vs_k141_23560  full    | 2973  | No | NA | 0  | 2 | Not-determined | Genome-fragment | NA    | 0 |
| S9_vs_k141_56170  full    | 2794  | No | NA | 0  | 3 | Not-determined | Genome-fragment | NA    | 0 |
| S9_vs_k141_78246  full    | 2400  | No | NA | 0  | 1 | Not-determined | Genome-fragment | NA    | 0 |
| S9_vs_k141_39640  full    | 1908  | No | NA | 0  | 0 | Not-determined | Genome-fragment | NA    | 0 |
| S12_vs_k141_52758  full   | 1137  | No | NA | 0  | 0 | Low-quality    | Genome-fragment | 1.29  | 0 |
| S9_vs_k141_86218  full    | 4083  | No | NA | 0  | 7 | Not-determined | Genome-fragment | NA    | 0 |
| S9_vs_k141_21213  full    | 1458  | No | NA | 0  | 1 | Not-determined | Genome-fragment | NA    | 0 |
| S8_vs_k141_69040  full    | 1137  | No | NA | 0  | 1 | Low-quality    | Genome-fragment | 2.39  | 0 |
| S9_vs_k141_62172  full    | 1138  | No | NA | 3  | 0 | Low-quality    | Genome-fragment | 1.91  | 0 |
| S11_vs_k141_48803  full   | 1138  | No | NA | 1  | 0 | Low-quality    | Genome-fragment | 2.62  | 0 |
| S11_vs_k141_71244  full   | 1138  | No | NA | 0  | 0 | Low-quality    | Genome-fragment | 0.6   | 0 |
| S9_vs_k141_48240  full    | 33693 | No | NA | 12 | 0 | Medium-quality | Genome-fragment | 81.63 | 0 |
| S9_vs_k141_22136  full    | 2939  | No | NA | 0  | 1 | Not-determined | Genome-fragment | NA    | 0 |
| S9_vs_k141_10676  full    | 1917  | No | NA | 0  | 2 | Not-determined | Genome-fragment | NA    | 0 |
| S9_vs_k141_41157  full    | 2817  | No | NA | 0  | 1 | Not-determined | Genome-fragment | NA    | 0 |
| S9_vs_k141_7060  full     | 1613  | No | NA | 0  | 1 | Not-determined | Genome-fragment | NA    | 0 |
| S9_vs_k141_18577  full    | 4323  | No | NA | 0  | 0 | Not-determined | Genome-fragment | NA    | 0 |
| S9_vs_k141_56234  full    | 6567  | No | NA | 0  | 0 | Not-determined | Genome-fragment | NA    | 0 |
| S9_vs_k141_14166  full    | 3122  | No | NA | 0  | 0 | Not-determined | Genome-fragment | NA    | 0 |
| S9_vs_k141_59709  full    | 3039  | No | NA | 0  | 2 | Not-determined | Genome-fragment | NA    | 0 |
| S13_extracted_81669       | 1138  | No | NA | 0  | 0 | Low-quality    | Genome-fragment | 1.86  | 0 |
| S9_vs_k141_70952  full    | 2393  | No | NA | 0  | 1 | Not-determined | Genome-fragment | NA    | 0 |
| S14_vs_k141_64558  full   | 1138  | No | NA | 1  | 0 | Low-quality    | Genome-fragment | 2.61  | 0 |
| S3_extracted_k141_32085   | 1138  | No | NA | 0  | 1 | Low-quality    | Genome-fragment | 0.64  | 0 |
| S9_vs_k141_10703  full    | 3368  | No | NA | 0  | 2 | Not-determined | Genome-fragment | NA    | 0 |
| S5_vs_k141_64903  full    | 1138  | No | NA | 0  | 0 | Low-quality    | Genome-fragment | 2.18  | 0 |
| S9_vs_k141_89926  full    | 1815  | No | NA | 0  | 2 | Not-determined | Genome-fragment | NA    | 0 |
| S5_vs_k141_76750  full    | 1138  | No | NA | 1  | 1 | Low-quality    | Genome-fragment | 0.35  | 0 |
| S7_extracted_65908        | 1138  | No | NA | 1  | 0 | Low-quality    | Genome-fragment | 2.63  | 0 |
| S7_vs_115295  full        | 1138  | No | NA | 2  | 0 | Low-quality    | Genome-fragment | 1.78  | 0 |
| S9_vs_k141_48309  full    | 1039  | No | NA | 0  | 0 | Not-determined | Genome-fragment | NA    | 0 |
| S7_vs_130930  full        | 1138  | No | NA | 2  | 0 | Low-quality    | Genome-fragment | 3.13  | 0 |
| S9_vs_k141_13625  full    | 1839  | No | NA | 0  | 1 | Not-determined | Genome-fragment | NA    | 0 |
| S9_vs_k141_13713  full    | 1320  | No | NA | 0  | 2 | Not-determined | Genome-fragment | NA    | 0 |
| S4_extracted_19844        | 1138  | No | NA | 0  | 0 | Low-quality    | Genome-fragment | 2.27  | 0 |
| S4_extracted_30757        | 1138  | No | NA | 3  | 0 | Low-quality    | Genome-fragment | 3.76  | 0 |
| S9_vs_k141_30030  full    | 3073  | No | NA | 0  | 3 | Not-determined | Genome-fragment | NA    | 0 |
| S9_vs_k141_483215  full   | 8794  | No | NA | 0  | 2 | Not-determined | Genome-fragment | NA    | 0 |
| S9_vs_k141_59760  full    | 1549  | No | NA | 0  | 1 | Not-determined | Genome-fragment | NA    | 0 |
| S9_vs_k141_30037  full    | 1139  | No | NA | 0  | 0 | Low-quality    | Genome-fragment | 1.85  | 0 |
| S9_vs_k141_17473  full    | 42219 | No | NA | 20 | 1 | High-quality   | Genome-fragment | 98.78 | 0 |
| S9_vs_k141_30075  full    | 2621  | No | NA | 0  | 1 | Not-determined | Genome-fragment | NA    | 0 |
| S9_vs_k141_32411  full    | 1192  | No | NA | 0  | 0 | Not-determined | Genome-fragment | NA    | 0 |
| S11_extracted_k141_18884  | 1139  | No | NA | 0  | 0 | Low-quality    | Genome-fragment | 2.38  | 0 |
| S9_vs_k141_71037  full    | 2512  | No | NA | 0  | 2 | Not-determined | Genome-fragment | NA    | 0 |
| S9_vs_k141_37449  full    | 1798  | No | NA | 0  | 1 | Not-determined | Genome-fragment | NA    | 0 |
| S5_extracted_k141_32384   | 1139  | No | NA | 1  | 0 | Low-quality    | Genome-fragment | 2.05  | 0 |
| S16_vs_44927  full        | 1139  | No | NA | 0  | 0 | Low-quality    | Genome-fragment | 3.14  | 0 |
| S9_vs_k141_89957  full    | 1976  | No | NA | 0  | 4 | Not-determined | Genome-fragment | NA    | 0 |
| S12_extracted_k141_15387  | 1139  | No | NA | 0  | 0 | Low-quality    | Genome-fragment | 2.21  | 0 |
| S12_vs_k141_101040  full  | 1139  | No | NA | 0  | 0 | Low-quality    | Genome-fragment | 0.61  | 0 |
| S9_vs_k141_48347  full    | 35042 | No | NA | 21 | 0 | High-quality   | High-quality    | 100   | 0 |
| S12_vs_k141_125694  full  | 1139  | No | NA | 1  | 0 | Low-quality    | Genome-fragment | 2.86  | 0 |
| S9_vs_k141_16741  full    | 3213  | No | NA | 1  | 2 | Not-determined | Genome-fragment | NA    | 0 |
| S9_vs_k141_14255  full    | 21474 | No | NA | 5  | 1 | Medium-quality | Genome-fragment | 57.29 | 0 |
| S9_vs_k141_51532  full    | 1569  | No | NA | 0  | 2 | Not-determined | Genome-fragment | NA    | 0 |
| S12_vs_k141_15562  full   | 1139  | No | NA | 0  | 0 | Low-quality    | Genome-fragment | 2.01  | 0 |
| S11_vs_k141_74885  full   | 1440  | No | NA | 0  | 0 | Low-quality    | Genome-fragment | 0.4   | 0 |
| S9_vs_k141_51543  full    | 2126  | No | NA | 0  | 3 | Not-determined | Genome-fragment | NA    | 0 |
| S9_vs_k141_86383  full    | 1326  | No | NA | 0  | 0 | Not-determined | Genome-fragment | NA    | 0 |
| S11_vs_k141_88752  full   | 1140  | No | NA | 0  | 0 | Low-quality    | Genome-fragment | 3.9   | 0 |
| S9_vs_k141_10867  full    | 1479  | No | NA | 0  | 0 | Not-determined | Genome-fragment | NA    | 0 |
| S9_vs_k141_41361  full    | 2627  | No | NA | 0  | 0 | Not-determined | Genome-fragment | NA    | 0 |
| S9_vs_k141_56354  full    | 44039 | No | NA | 17 | 2 | High-quality   | Genome-fragment | 98.12 | 0 |
| S11_vs_k141_64489  H2gene | 1140  | No | NA | 2  | 0 | Low-quality    | Genome-fragment | 3.28  | 0 |
| S14_extracted_k141_110710 | 1140  | No | NA | 0  | 0 | Low-quality    | Genome-fragment | 1.97  | 0 |
| S14_extracted_k141_7073   | 1140  | No | NA | 0  | 1 | Low-quality    | Genome-fragment | 1.21  | 0 |
| S9_vs_k141_67281  full    | 1594  | No | NA | 0  | 2 | Not-determined | Genome-fragment | NA    | 0 |
| S14_vs_k141_40567  full   | 1140  | No | NA | 2  | 0 | Low-quality    | Genome-fragment | 3.28  | 0 |
| S1_extracted_k141_131946  | 1140  | No | NA | 0  | 0 | Low-quality    | Genome-fragment | 1.79  | 0 |
| S1_vs_k141_157295  H2gene | 1140  | No | NA | 1  | 0 | Low-quality    | Genome-fragment | 0.66  | 0 |
| S3_vs_k141_48255  full    | 1140  | No | NA | 1  | 0 | Low-quality    | Genome-fragment | 0.5   | 0 |
| S5_extracted_k141_122802  | 1140  | No | NA | 1  | 0 | Low-quality    | Genome-fragment | 3.86  | 0 |
| S9_vs_k141_41371  full    | 25415 | No | NA | 21 | 0 | Medium-quality | Genome-fragment | 58.18 | 0 |
| S5_extracted_k141_104979  | 1140  | No | NA | 2  | 0 | Low-quality    | Genome-fragment | 1.64  | 0 |
| S5_vs_k141_115528  full   | 1140  | No | NA | 2  | 0 | Low-quality    | Genome-fragment | 2.24  | 0 |
| S9_vs_k141_39919  full    | 1641  | No | NA | 0  | 1 | Not-determined | Genome-fragment | NA    | 0 |
| S5_vs_k141_118205  H2gene | 1140  | No | NA | 2  | 0 | Low-quality    | Genome-fragment | 2.45  | 0 |
| S9_vs_k141_41397  full    | 4342  | No | NA | 0  | 0 | Not-determined | Genome-fragment | NA    | 0 |
| S9_vs_k141_17560  full    | 4684  | No | NA | 0  | 2 | Not-determined | Genome-fragment | NA    | 0 |



|                             |        |     |       |    |                 |                 |       |       |
|-----------------------------|--------|-----|-------|----|-----------------|-----------------|-------|-------|
| S12_vs_k141_112448  full    | 1141   | NA  | 0     | 0  | Low-quality     | Genome-fragment | 0.84  | 0     |
| S15_vs_k141_174241  full    | 1141   | NA  | 0     | 0  | Low-quality     | Genome-fragment | 1.34  | 0     |
| S9_vs_k141_14450  full      | 2476   | NA  | 0     | 2  | Not-determined  | Genome-fragment | NA    | 0     |
| S6_vs_k141_13956  full      | 1141   | NA  | 2     | 0  | Low-quality     | Genome-fragment | 2.9   | 0     |
| S8_vs_k141_26228  full      | 1141   | NA  | 0     | 0  | Low-quality     | Genome-fragment | 2.59  | 0     |
| S9_vs_k141_50185  full      | 1085   | NA  | 0     | 0  | Not-determined  | Genome-fragment | NA    | 0     |
| S17_extracted_k141_139099   | 1142   | NA  | 0     | 0  | Low-quality     | Genome-fragment | 0.57  | 0     |
| S9_vs_k141_11044  full      | 1063   | NA  | 0     | 0  | Not-determined  | Genome-fragment | NA    | 0     |
| S9_vs_k141_75168  full      | 1467   | NA  | 0     | 0  | Not-determined  | Genome-fragment | NA    | 0     |
| S17_extracted_k141_95097    | 1142   | NA  | 0     | 1  | Low-quality     | Genome-fragment | 2.26  | 0     |
| S9_vs_k141_75175  full      | 1093   | NA  | 0     | 2  | Not-determined  | Genome-fragment | NA    | 0     |
| S9_vs_k141_2467  full       | 2177   | NA  | 0     | 1  | Not-determined  | Genome-fragment | NA    | 0     |
| S9_vs_k141_78689  full      | 1058   | NA  | 0     | 0  | Not-determined  | Genome-fragment | NA    | 0     |
| S9_vs_k141_7440  full       | 1321   | NA  | 0     | 1  | Not-determined  | Genome-fragment | NA    | 0     |
| S9_vs_k141_5155  full       | 2839   | NA  | 0     | 2  | Not-determined  | Genome-fragment | NA    | 0     |
| S13_extracted_9908          | 1142   | NA  | 0     | 0  | Low-quality     | Genome-fragment | 2.05  | 0     |
| S9_vs_k141_56556  full      | 1197   | NA  | 0     | 2  | Not-determined  | Genome-fragment | NA    | 0     |
| S13_extracted_145962        | 1142   | NA  | 0     | 0  | Low-quality     | Genome-fragment | 2.47  | 0     |
| S12_vs_123156  H2gene       | 1142   | NA  | 0     | 0  | Low-quality     | Genome-fragment | 1.19  | 0     |
| S9_vs_k141_26324  full      | 1969   | NA  | 0     | 1  | Not-determined  | Genome-fragment | NA    | 0     |
| S14_extracted_k141_10151    | 1142   | NA  | 2     | 0  | Low-quality     | Genome-fragment | 3.75  | 0     |
| S9_vs_k141_67538  full      | 2639   | NA  | 0     | 1  | Not-determined  | Genome-fragment | NA    | 0     |
| S1_vs_k141_158659  full     | 1142   | NA  | 0     | 0  | Low-quality     | Genome-fragment | 0.74  | 0     |
| S3_vs_k141_58133  full      | 1142   | NA  | 0     | 0  | Low-quality     | Genome-fragment | 2.36  | 0     |
| S9_vs_k141_51676  full      | 2849   | NA  | 0     | 1  | Not-determined  | Genome-fragment | NA    | 0     |
| S5_extracted_k141_137757    | 1142   | NA  | 0     | 1  | Low-quality     | Genome-fragment | 0.43  | 0     |
| S9_vs_k141_78779  full      | 1306   | NA  | 0     | 2  | Not-determined  | Genome-fragment | NA    | 0     |
| S9_vs_k141_37768  full      | 5737   | NA  | 0     | 0  | Not-determined  | Genome-fragment | NA    | 0     |
| S9_vs_k141_48538  full      | 1462   | NA  | 0     | 3  | Not-determined  | Genome-fragment | NA    | 0     |
| S7_extracted_674            | 1142   | NA  | 1     | 0  | Low-quality     | Genome-fragment | 2.72  | 0     |
| S9_vs_k141_78796  full      | 3577   | NA  | 0     | 3  | Not-determined  | Genome-fragment | NA    | 0     |
| S7_vs_13867  full           | 1142   | NA  | 0     | 0  | Low-quality     | Genome-fragment | 2.5   | 0     |
| S7_vs_42483  full           | 1142   | NA  | 1     | 0  | Low-quality     | Genome-fragment | 2.35  | 0     |
| S7_vs_74338  H2gene         | 1142   | NA  | 1     | 0  | Low-quality     | Genome-fragment | 0.44  | 0     |
| S9_vs_k141_15557  full      | 2110   | NA  | 0     | 0  | Not-determined  | Genome-fragment | NA    | 0     |
| S9_vs_k141_72909  full      | 12648  | NA  | 0     | 0  | High-quality    | Genome-fragment | 92.6  | 0     |
| S9_vs_k141_14662  full      | 2418   | NA  | 0     | 1  | Not-determined  | Genome-fragment | NA    | 0     |
| S16_extracted_58727         | 1142   | NA  | 0     | 1  | Low-quality     | Genome-fragment | 1.94  | 0     |
| S9_vs_k141_90304  full      | 3180   | NA  | 0     | 3  | Not-determined  | Genome-fragment | NA    | 0     |
| S16_vs_14664  full          | 1142   | NA  | 0     | 1  | Low-quality     | Genome-fragment | 0.82  | 0     |
| S10_extracted_17657         | 1142   | NA  | 0     | 0  | Low-quality     | Genome-fragment | 2.11  | 0     |
| S9_vs_k141_51796  full      | 2443   | NA  | 0     | 2  | Not-determined  | Genome-fragment | NA    | 0     |
| S10_extracted_104192        | 1142   | NA  | 0     | 1  | Low-quality     | Genome-fragment | 1.57  | 0     |
| S12_vs_k141_49689  full     | 1142   | NA  | 0     | 0  | Low-quality     | Genome-fragment | 2.7   | 0     |
| S9_vs_k141_67662  full      | 1693   | NA  | 0     | 0  | Not-determined  | Genome-fragment | NA    | 0     |
| S9_vs_k141_14698  full      | 3810   | NA  | 0     | 3  | Not-determined  | Genome-fragment | NA    | 0     |
| S12_vs_k141_28971  full     | 1142   | NA  | 0     | 0  | Low-quality     | Genome-fragment | 1.43  | 0     |
| S9_vs_k141_51847  full      | 3948   | NA  | 0     | 1  | Not-determined  | Genome-fragment | NA    | 0     |
| S9_vs_k141_67686  full      | 1662   | NA  | 0     | 0  | Not-determined  | Genome-fragment | NA    | 0     |
| S12_vs_k141_101059  full    | 1142   | NA  | 0     | 0  | Low-quality     | Genome-fragment | 2.46  | 0     |
| S17_vs_k141_10063  full     | 1143   | NA  | 1     | 0  | Low-quality     | Genome-fragment | 1.32  | 0     |
| S9_vs_k141_46315  full      | 1142   | NA  | 0     | 0  | Low-quality     | Genome-fragment | 2.05  | 0     |
| S9_vs_k141_67696  full      | 1223   | NA  | 0     | 0  | Not-determined  | Genome-fragment | NA    | 0     |
| S9_vs_k141_14734  full      | 3251   | NA  | 0     | 2  | Not-determined  | Genome-fragment | NA    | 0     |
| S9_vs_k141_26747  full      | 2542   | NA  | 0     | 0  | Not-determined  | Genome-fragment | NA    | 0     |
| S11_vs_k141_54093  full     | 1143   | NA  | 0     | 0  | Low-quality     | Genome-fragment | 2.23  | 0     |
| S9_vs_k141_60256  full      | 1825   | NA  | 0     | 0  | Not-determined  | Genome-fragment | NA    | 0     |
| S11_vs_k141_74237  full     | 1143   | NA  | 0     | 0  | Low-quality     | Genome-fragment | 1.12  | 0     |
| S9_vs_k141_3678  full       | 1004   | NA  | 0     | 1  | Not-determined  | Genome-fragment | NA    | 0     |
| S1_extracted_k141_81508     | 1143   | NA  | 1     | 0  | Low-quality     | Genome-fragment | 1.42  | 0     |
| S1_extracted_k141_159237    | 1143   | NA  | 0     | 0  | Low-quality     | Genome-fragment | 1.43  | 0     |
| S9_vs_k141_48692  full      | 1272   | NA  | 0     | 0  | Not-determined  | Genome-fragment | NA    | 0     |
| S9_vs_k141_78993  full      | 3810   | NA  | 0     | 4  | Not-determined  | Genome-fragment | NA    | 0     |
| S9_vs_k141_63732  full      | 2535   | NA  | 0     | 2  | Not-determined  | Genome-fragment | NA    | 0     |
| S9_vs_k141_75466  full      | 7706   | NA  | 0     | 3  | Not-determined  | Genome-fragment | NA    | 0     |
| S5_extracted_k141_107443    | 1143   | NA  | 1     | 0  | Low-quality     | Genome-fragment | 2.94  | 0     |
| S9_vs_k141_11339  full      | 1242   | NA  | 0     | 0  | Not-determined  | Genome-fragment | NA    | 0     |
| S9_vs_k141_71681  full      | 3964   | NA  | 0     | 1  | Not-determined  | Genome-fragment | NA    | 0     |
| S9_vs_k141_51455  full      | 1143   | NA  | 0     | 0  | Low-quality     | Genome-fragment | 0.39  | 0     |
| S7_vs_55124  full           | 1143   | NA  | 0     | 1  | Low-quality     | Genome-fragment | 0.95  | 0     |
| S9_vs_k141_52069  full      | 2367   | NA  | 0     | 0  | Not-determined  | Genome-fragment | NA    | 0     |
| S9_vs_k141_63810  full      | 2147   | NA  | 0     | 2  | Not-determined  | Genome-fragment | NA    | 0     |
| S9_vs_k141_52089  full      | 1576   | NA  | 0     | 1  | Not-determined  | Genome-fragment | NA    | 0     |
| S9_vs_k141_68692  full      | 2008   | NA  | 0     | 0  | Not-determined  | Genome-fragment | NA    | 0     |
| S7_vs_131452  H2gene        | 1143   | NA  | 0     | 2  | Not-determined  | Genome-fragment | 1.63  | 0     |
| S9_vs_k141_67792  full      | 72275  | NA  | 39401 | 26 | 18 Complete     | High-quality    | 100   | 45.48 |
| S9_vs_k141_90476  full      | 1030   | NA  | 0     | 0  | Not-determined  | Genome-fragment | NA    | 0     |
| S9_vs_k141_17554  full      | 1222   | NA  | 0     | 1  | Not-determined  | Genome-fragment | NA    | 0     |
| S10_extracted_13057         | 1143   | NA  | 0     | 1  | Low-quality     | Genome-fragment | 0.31  | 0     |
| S9_vs_k141_71756  full      | 1667   | NA  | 0     | 1  | Not-determined  | Genome-fragment | NA    | 0     |
| S9_vs_k141_42948  full      | 2515   | NA  | 0     | 0  | Not-determined  | Genome-fragment | NA    | 0     |
| S9_vs_k141_60943  full      | 4274   | NA  | 0     | 1  | Not-determined  | Genome-fragment | NA    | 0     |
| S9_vs_k141_71761  full      | 1652   | NA  | 0     | 1  | Not-determined  | Genome-fragment | NA    | 0     |
| S9_vs_k141_67962  full      | 1878   | NA  | 0     | 1  | Not-determined  | Genome-fragment | NA    | 0     |
| S10_extracted_48653         | 1143   | NA  | 0     | 0  | Low-quality     | Genome-fragment | 1.42  | 0     |
| S9_vs_k141_67844  full      | 3582   | NA  | 0     | 2  | Not-determined  | Genome-fragment | NA    | 0     |
| S10_vs_82184  H2gene        | 1143   | NA  | 2     | 0  | Low-quality     | Genome-fragment | 3.02  | 0     |
| S9_vs_k141_63859  full      | 1979   | NA  | 0     | 0  | Not-determined  | Genome-fragment | NA    | 0     |
| S9_vs_k141_48874  full      | 2136   | NA  | 0     | 0  | Not-determined  | Genome-fragment | NA    | 0     |
| S12_vs_k141_176760  H2gene  | 1143   | NA  | 1     | 0  | Low-quality     | Genome-fragment | 2.16  | 0     |
| S15_extracted_41530         | 1143   | NA  | 0     | 0  | Low-quality     | Genome-fragment | 1.23  | 0     |
| S9_vs_k141_11837  full      | 1358   | NA  | 0     | 1  | Not-determined  | Genome-fragment | NA    | 0     |
| S2_vs_k141_2551  full       | 1143   | NA  | 0     | 1  | Low-quality     | Genome-fragment | 0.49  | 0     |
| S9_vs_k141_14967  full      | 3863   | NA  | 0     | 3  | Not-determined  | Genome-fragment | NA    | 0     |
| S9_vs_k141_79217  full      | 1866   | NA  | 0     | 0  | Not-determined  | Genome-fragment | NA    | 0     |
| S17_extracted_k141_117086   | 1144   | NA  | 0     | 0  | Low-quality     | Genome-fragment | 2.99  | 0     |
| S9_vs_k141_9712  full       | 1144   | NA  | 2     | 0  | Low-quality     | Genome-fragment | 2.63  | 0     |
| S9_vs_k141_14092  full      | 1647   | NA  | 0     | 0  | Not-determined  | Genome-fragment | NA    | 0     |
| S9_vs_k141_1222  full       | 3251   | NA  | 0     | 0  | Not-determined  | Genome-fragment | NA    | 0     |
| S9_vs_k141_15014  full      | 2014   | NA  | 0     | 2  | Not-determined  | Genome-fragment | NA    | 0     |
| S11_extracted_k141_38071    | 1144   | NA  | 0     | 0  | Low-quality     | Genome-fragment | 3.05  | 0     |
| S13_vs_20960  full          | 1144   | NA  | 0     | 0  | Low-quality     | Genome-fragment | 2.85  | 0     |
| S9_vs_k141_68005  full      | 2933   | NA  | 0     | 1  | Not-determined  | Genome-fragment | NA    | 0     |
| S13_vs_68772  full          | 1144   | NA  | 0     | 0  | Low-quality     | Genome-fragment | 2     | 0     |
| S9_vs_k141_64004  full      | 1613   | NA  | 0     | 2  | Not-determined  | Genome-fragment | NA    | 0     |
| S9_vs_k141_60430  full      | 1505   | NA  | 0     | 1  | Not-determined  | Genome-fragment | NA    | 0     |
| S13_vs_104546  full         | 1144   | NA  | 0     | 0  | Low-quality     | Genome-fragment | 2.79  | 0     |
| S1_vs_k141_65486  H2gene    | 1144   | NA  | 2     | 0  | Low-quality     | Genome-fragment | 2.81  | 0     |
| S3_vs_k141_56485  full      | 1144   | NA  | 0     | 0  | Low-quality     | Genome-fragment | 1.81  | 0     |
| S5_extracted_k141_93878     | 1144   | NA  | 1     | 0  | Low-quality     | Genome-fragment | 1.81  | 0     |
| S7_vs_33958  H2gene         | 1144   | NA  | 1     | 0  | Low-quality     | Genome-fragment | 2.94  | 0     |
| S9_vs_k141_49063  full      | 1896   | NA  | 0     | 1  | Not-determined  | Genome-fragment | NA    | 0     |
| S10_vs_58081  full          | 1144   | NA  | 0     | 0  | Low-quality     | Genome-fragment | 1.98  | 0     |
| S10_vs_75924  H2gene        | 1144   | NA  | 1     | 0  | Low-quality     | Genome-fragment | 3.07  | 0     |
| S9_vs_k141_83208  full      | 88175  | NA  | 16    | 1  | High-quality    | Genome-fragment | 100   | 0     |
| S9_vs_k141_83137  full      | 1010   | NA  | 0     | 0  | Not-determined  | Genome-fragment | NA    | 0     |
| S9_vs_k141_52280  full      | 5521   | NA  | 0     | 3  | Not-determined  | Genome-fragment | NA    | 0     |
| S12_extracted_k141_46902    | 1144   | NA  | 1     | 0  | Low-quality     | Genome-fragment | 2.75  | 0     |
| S8_vs_k141_111140  full     | 1144   | NA  | 0     | 1  | Low-quality     | Genome-fragment | 2.46  | 0     |
| S17_extracted_k141_156129   | 1145   | NA  | 1     | 0  | Low-quality     | Genome-fragment | 2.07  | 0     |
| S17_extracted_k141_52048    | 1145   | NA  | 2     | 0  | Low-quality     | Genome-fragment | 2.69  | 0     |
| S11_vs_k141_83167  full     | 1145   | NA  | 0     | 0  | Low-quality     | Genome-fragment | 3.15  | 0     |
| S14_extracted_k141_7749     | 1145   | NA  | 1     | 0  | Low-quality     | Genome-fragment | 3.78  | 0     |
| S14_extracted_k141_5687     | 1145   | NA  | 3     | 0  | Low-quality     | Genome-fragment | 3.74  | 0     |
| S9_vs_k141_49152  full      | 2871   | NA  | 0     | 1  | Not-determined  | Genome-fragment | NA    | 0     |
| S14_extracted_k141_76355    | 1145   | NA  | 0     | 0  | Low-quality     | Genome-fragment | 2.43  | 0     |
| S1_extracted_k141_17172     | 1145   | NA  | 0     | 1  | Low-quality     | Genome-fragment | 1.95  | 0     |
| S9_vs_k141_63290  full      | 2163   | NA  | 0     | 0  | Not-determined  | Genome-fragment | NA    | 0     |
| S3_vs_k141_2162  full       | 1145   | NA  | 0     | 0  | Low-quality     | Genome-fragment | 2.16  | 0     |
| S9_vs_k141_49246  full      | 1053   | NA  | 0     | 2  | Not-determined  | Genome-fragment | NA    | 0     |
| S9_vs_k141_50727  full      | 173713 | Yes | 66238 | 26 | 68 High-quality | High-quality    | 97.83 | 61.87 |
| S9_vs_k141_51643  full      | 1977   | NA  | 0     | 0  | Not-determined  | Genome-fragment | NA    | 0     |
| S5_extracted_k141_103184    | 1145   | NA  | 0     | 1  | Low-quality     | Genome-fragment | 2.68  | 0     |
| S16_extracted_58709         | 1145   | NA  | 1     | 0  | Low-quality     | Genome-fragment | 2.5   | 0     |
| S9_vs_k141_52757  full      | 1526   | NA  | 0     | 0  | Not-determined  | Genome-fragment | NA    | 0     |
| S16_vs_41073  full          | 1145   | NA  | 0     | 0  | Low-quality     | Genome-fragment | 2.86  | 0     |
| S12_extracted_k141_181715   | 1145   | NA  | 0     | 1  | Low-quality     | Genome-fragment | 1.48  | 0     |
| S12_extracted_k141_27947    | 1145   | NA  | 0     | 0  | Low-quality     | Genome-fragment | 3.78  | 0     |
| S9_vs_k141_16723  full      | 1146   | NA  | 0     | 1  | Low-quality     | Genome-fragment | 0.59  | 0     |
| S9_vs_k141_23649  0_partial | 18591  | NA  | 0     | 1  | Not-determined  | Genome-fragment | NA    | 0     |
| S9_vs_k141_15642  H2gene    | 1146   | NA  | 1     | 0  | Low-quality     | Genome-fragment | 2.83  | 0     |
| S1_extracted_k141_119796    | 1146   | NA  | 1     | 0  | Low-quality     | Genome-fragment | 1.92  | 0     |
| S1_extracted_k141_106755    | 1146   | NA  | 0     | 0  | Low-quality     | Genome-fragment | 2.17  | 0     |
| S1_vs_k141_48609  full      | 1146   | NA  | 0     | 0  | Low-quality     | Genome-fragment | 1.87  | 0     |
| S5_extracted_k141_53674     | 1146   | NA  | 0     | 0  | Low-quality     | Genome-fragment | 1.41  | 0     |
| S9_vs_k141_38095  H2gene    | 1878   | NA  | 0     | 0  | Not-determined  | Genome-fragment | NA    | 0     |
| S5_vs_k141_68374  full      | 1146   | NA  | 1     | 0  | Low-quality     | Genome-fragment | 3.06  | 0     |
| S5_vs_k141_13428  H2gene    | 1146   | NA  | 0     | 0  | Low-quality     | Genome-fragment | 2.68  | 0     |
| S16_extracted_29876         | 1146   | NA  | 1     | 0  | Low-quality     | Genome-fragment | 2.9   | 0     |
| S16_extracted_122610        | 1146   | NA  | 2     | 0  | Low-quality     | Genome-fragment | 2.54  | 0     |
| S16_extracted_192200        | 1146   | NA  | 0     | 0  | Low-quality     | Genome-fragment | 1.81  | 0     |
| S16_vs_30547  full          | 1146   | NA  | 0     | 0  | Low-quality     | Genome-fragment | 0.55  | 0     |
| S15_extracted_45120         | 1146   | NA  | 0     | 1  | Low-quality     | Genome-fragment | 1.58  | 0     |
| S8_extracted_k1             |        |     |       |    |                 |                 |       |       |



|                             |       |    |     |   |                |                 |      |   |
|-----------------------------|-------|----|-----|---|----------------|-----------------|------|---|
| 59_vs_k141_16515   H2gene   | 1254  | NA | 0   | 0 | Not-determined | Genome-fragment | NA   | 0 |
| S10_vs_12161   full         | 1147  | NA | 1   | 0 | Low-quality    | Genome-fragment | 1.67 | 0 |
| S8_vs_k141_143740   full    | 1147  | NA | 1   | 0 | Low-quality    | Genome-fragment | 3.05 | 0 |
| S8_vs_k141_154279   full    | 1147  | NA | 1   | 0 | Low-quality    | Genome-fragment | 2.12 | 0 |
| S17_vs_k141_27246   full    | 1148  | NA | 2   | 0 | Low-quality    | Genome-fragment | 2.11 | 0 |
| S9_vs_k141_105311   full    | 1148  | NA | 2   | 0 | Low-quality    | Genome-fragment | 0.91 | 0 |
| S3_vs_k141_9681   full      | 1148  | NA | 1   | 0 | Low-quality    | Genome-fragment | 1.88 | 0 |
| S5_extracted_k141_38231     | 1148  | NA | 3   | 0 | Low-quality    | Genome-fragment | 3.77 | 0 |
| S7_extracted_111877         | 1148  | NA | 0   | 0 | Low-quality    | Genome-fragment | 2.47 | 0 |
| S9_vs_k141_28254   H2gene   | 1863  | NA | 0   | 0 | Not-determined | Genome-fragment | NA   | 0 |
| S16_vs_35774   H2gene       | 1148  | NA | 1   | 0 | Low-quality    | Genome-fragment | 2.76 | 0 |
| S9_vs_k141_25931   H2gene   | 2363  | NA | 1   | 0 | Not-determined | Genome-fragment | NA   | 0 |
| S12_vs_k141_124732   full   | 1148  | NA | 1   | 0 | Low-quality    | Genome-fragment | 1.89 | 0 |
| S12_vs_k141_15593   full    | 1148  | NA | 0   | 0 | Low-quality    | Genome-fragment | 2.01 | 0 |
| S9_vs_k141_62430   H2gene   | 1184  | NA | 0   | 0 | Not-determined | Genome-fragment | NA   | 0 |
| S8_vs_k141_189104   full    | 1148  | NA | 0   | 0 | Low-quality    | Genome-fragment | 0.55 | 0 |
| S11_vs_k141_56219   full    | 1149  | NA | 1   | 0 | Low-quality    | Genome-fragment | 8.51 | 0 |
| S13_extracted_47576         | 1149  | NA | 1   | 0 | Low-quality    | Genome-fragment | 3.18 | 0 |
| S14_extracted_k141_114742   | 1149  | NA | 0   | 1 | Low-quality    | Genome-fragment | 0.23 | 0 |
| S1_extracted_k141_21632     | 1149  | NA | 0   | 0 | Low-quality    | Genome-fragment | 0.72 | 0 |
| S1_vs_k141_110286   full    | 1149  | NA | 0   | 0 | Low-quality    | Genome-fragment | 1.75 | 0 |
| S3_extracted_k141_10466     | 1149  | NA | 2   | 0 | Low-quality    | Genome-fragment | 2.01 | 0 |
| S7_extracted_109515         | 1149  | NA | 0   | 0 | Low-quality    | Genome-fragment | 1.76 | 0 |
| S7_vs_84701   full          | 1149  | NA | 0   | 0 | Low-quality    | Genome-fragment | 2.08 | 0 |
| S16_extracted_75336         | 1149  | NA | 1   | 0 | Low-quality    | Genome-fragment | 2.74 | 0 |
| S16_vs_144209   full        | 1149  | NA | 1   | 0 | Low-quality    | Genome-fragment | 0.66 | 0 |
| S16_vs_164770   full        | 1149  | NA | 0   | 0 | Low-quality    | Genome-fragment | 2.43 | 0 |
| S10_extracted_72212         | 1149  | NA | 1   | 0 | Low-quality    | Genome-fragment | 2.01 | 0 |
| S4_extracted_2012           | 1149  | NA | 0   | 0 | Low-quality    | Genome-fragment | 2.1  | 0 |
| S8_extracted_k141_110426    | 1149  | NA | 0   | 3 | Low-quality    | Genome-fragment | 1.02 | 0 |
| S8_vs_k141_60392   full     | 1149  | NA | 0   | 1 | Low-quality    | Genome-fragment | 0.77 | 0 |
| S17_vs_k141_80456   full    | 1150  | NA | 0   | 0 | Low-quality    | Genome-fragment | 0.82 | 0 |
| S17_vs_k141_28362   full    | 1150  | NA | 0   | 0 | Low-quality    | Genome-fragment | 0.85 | 0 |
| S11_extracted_k141_99225    | 1150  | NA | 1   | 0 | Low-quality    | Genome-fragment | 1.86 | 0 |
| S13_vs_87189   full         | 1150  | NA | 0   | 0 | Low-quality    | Genome-fragment | 0.97 | 0 |
| S14_vs_k141_88714   full    | 1150  | NA | 0   | 0 | Low-quality    | Genome-fragment | 0.37 | 0 |
| S5_vs_k141_24321   H2gene   | 1150  | NA | 2   | 0 | Low-quality    | Genome-fragment | 3.38 | 0 |
| S7_extracted_27797          | 1150  | NA | 0   | 2 | Low-quality    | Genome-fragment | 0.69 | 0 |
| S7_vs_37168   full          | 1150  | NA | 0   | 0 | Low-quality    | Genome-fragment | 3.34 | 0 |
| S16_vs_68   full            | 1150  | NA | 1   | 0 | Low-quality    | Genome-fragment | 2.28 | 0 |
| S16_vs_152325   full        | 1150  | NA | 0   | 0 | Low-quality    | Genome-fragment | 1.07 | 0 |
| S10_vs_104152   full        | 1150  | NA | 0   | 0 | Low-quality    | Genome-fragment | 1.88 | 0 |
| S10_vs_87428   H2gene       | 1150  | NA | 1   | 0 | Low-quality    | Genome-fragment | 2.66 | 0 |
| S8_extracted_k141_29890     | 1150  | NA | 0   | 0 | Low-quality    | Genome-fragment | 2.99 | 0 |
| S8_vs_k141_167776   full    | 1150  | NA | 2   | 0 | Low-quality    | Genome-fragment | 1.9  | 0 |
| S9_extracted_k141_16518     | 1151  | NA | 0   | 0 | Low-quality    | Genome-fragment | 2.42 | 0 |
| S9_vs_k141_20273   full     | 1151  | NA | 0   | 0 | Low-quality    | Genome-fragment | 1.52 | 0 |
| S9_vs_k141_85064   full     | 1151  | NA | 2   | 0 | Low-quality    | Genome-fragment | 1.71 | 0 |
| S11_extracted_k141_71708    | 1151  | NA | 0   | 0 | Low-quality    | Genome-fragment | 1.96 | 0 |
| S11_extracted_k141_65509    | 1151  | NA | 2   | 0 | Low-quality    | Genome-fragment | 2.83 | 0 |
| S9_vs_k141_52163   H2gene   | 1272  | NA | 0   | 0 | Not-determined | Genome-fragment | NA   | 0 |
| S9_vs_k141_76500   H2gene   | 1377  | NA | 0   | 0 | Not-determined | Genome-fragment | NA   | 0 |
| S11_vs_k141_89411   full    | 1151  | NA | 1   | 0 | Low-quality    | Genome-fragment | 0.79 | 0 |
| S9_vs_k141_15103   H2gene   | 1056  | NA | 0   | 0 | Not-determined | Genome-fragment | NA   | 0 |
| S12_vs_137758   full        | 1151  | NA | 0   | 0 | Low-quality    | Genome-fragment | 0.72 | 0 |
| S14_extracted_k141_46672    | 1151  | NA | 2   | 0 | Low-quality    | Genome-fragment | 2.95 | 0 |
| S1_vs_k141_7927   full      | 1151  | NA | 1   | 0 | Low-quality    | Genome-fragment | 1.51 | 0 |
| S11_extracted_k141_91116    | 2262  | NA | 0   | 0 | Not-determined | Genome-fragment | NA   | 0 |
| S5_vs_k141_54589   full     | 1151  | NA | 0   | 0 | Low-quality    | Genome-fragment | 1.86 | 0 |
| S11_extracted_k141_71598    | 1001  | NA | 0   | 0 | Not-determined | Genome-fragment | NA   | 0 |
| S11_extracted_k141_65124    | 1440  | NA | 0   | 1 | Not-determined | Genome-fragment | NA   | 0 |
| S11_extracted_k141_19546    | 5780  | NA | 0   | 3 | Not-determined | Genome-fragment | NA   | 0 |
| S11_extracted_k141_58587    | 16434 | NA | 6   | 0 | Medium-quality | Genome-fragment | 74.1 | 0 |
| S11_extracted_k141_45605    | 4665  | NA | 0   | 1 | Not-determined | Genome-fragment | NA   | 0 |
| S11_extracted_k141_97663    | 1041  | NA | 0   | 1 | Not-determined | Genome-fragment | NA   | 0 |
| S11_extracted_k141_52127    | 1056  | NA | 0   | 1 | Not-determined | Genome-fragment | NA   | 0 |
| S11_extracted_k141_71663    | 1488  | NA | 0   | 1 | Not-determined | Genome-fragment | NA   | 0 |
| S11_extracted_k141_12596    | 1899  | NA | 0   | 0 | Not-determined | Genome-fragment | NA   | 0 |
| S11_extracted_k141_97       | 2740  | NA | 0   | 0 | Not-determined | Genome-fragment | NA   | 0 |
| S11_extracted_k141_13033    | 60444 | NA | 35  | 1 | High-quality   | Genome-fragment | 100  | 0 |
| S11_extracted_k141_58676    | 1049  | NA | 0   | 1 | Not-determined | Genome-fragment | NA   | 0 |
| S7_extracted_26222          | 1151  | NA | 0   | 0 | Low-quality    | Genome-fragment | 2.92 | 0 |
| S16_extracted_140387        | 1151  | NA | 1   | 0 | Low-quality    | Genome-fragment | 0.97 | 0 |
| S16_vs_160053   full        | 1151  | NA | 1   | 0 | Low-quality    | Genome-fragment | 2.3  | 0 |
| S12_extracted_k141_16621    | 1151  | NA | 0   | 0 | Low-quality    | Genome-fragment | 1.85 | 0 |
| S11_extracted_k141_52218    | 1456  | NA | 0   | 1 | Not-determined | Genome-fragment | NA   | 0 |
| S11_extracted_k141_12645    | 4659  | NA | 0   | 2 | Not-determined | Genome-fragment | NA   | 0 |
| S12_vs_k141_166537   full   | 1151  | NA | 0   | 0 | Low-quality    | Genome-fragment | 2.29 | 0 |
| S11_extracted_k141_62885    | 1010  | NA | 0   | 0 | Not-determined | Genome-fragment | NA   | 0 |
| S12_vs_k141_104741   full   | 1151  | NA | 0   | 0 | Low-quality    | Genome-fragment | 1.57 | 0 |
| S17_extracted_k141_108623   | 1152  | NA | 0   | 1 | Low-quality    | Genome-fragment | 2.52 | 0 |
| S17_vs_k141_161920   H2gene | 1152  | NA | 0   | 0 | Not-determined | Genome-fragment | 2.09 | 0 |
| S11_extracted_k141_91332    | 1343  | NA | 0   | 1 | Not-determined | Genome-fragment | NA   | 0 |
| S9_extracted_k141_86863     | 1152  | NA | 2   | 0 | Low-quality    | Genome-fragment | 2.22 | 0 |
| S1_extracted_k141_61101     | 1152  | NA | 0   | 2 | Low-quality    | Genome-fragment | 2.14 | 0 |
| S3_extracted_k141_11592     | 1152  | NA | 0   | 0 | Low-quality    | Genome-fragment | 2.76 | 0 |
| S5_vs_k141_100476   full    | 1152  | NA | 0   | 0 | Low-quality    | Genome-fragment | 1.99 | 0 |
| S11_extracted_k141_76244    | 1414  | NA | 0   | 2 | Not-determined | Genome-fragment | NA   | 0 |
| S11_extracted_k141_1274     | 3750  | NA | 0   | 0 | Not-determined | Genome-fragment | NA   | 0 |
| S11_extracted_k141_39225    | 1409  | NA | 0   | 1 | Not-determined | Genome-fragment | NA   | 0 |
| S7_vs_32211   full          | 1152  | NA | 0   | 0 | Low-quality    | Genome-fragment | 2.58 | 0 |
| S10_vs_76500   full         | 1152  | NA | 0   | 1 | Low-quality    | Genome-fragment | 1.35 | 0 |
| S12_vs_k141_137101   full   | 1152  | NA | 0   | 2 | Low-quality    | Genome-fragment | 0.62 | 0 |
| S11_extracted_k141_58780    | 1026  | NA | 0   | 0 | Not-determined | Genome-fragment | NA   | 0 |
| S11_extracted_k141_12371    | 3167  | NA | 0   | 0 | Not-determined | Genome-fragment | NA   | 0 |
| S11_extracted_k141_32786    | 7443  | NA | 0   | 3 | Not-determined | Genome-fragment | NA   | 0 |
| S11_extracted_k141_407      | 1472  | NA | 0   | 0 | Not-determined | Genome-fragment | NA   | 0 |
| S6_extracted_k141_41535     | 1152  | NA | 0   | 1 | Low-quality    | Genome-fragment | 0.27 | 0 |
| S11_extracted_k141_417      | 1761  | NA | 0   | 0 | Not-determined | Genome-fragment | NA   | 0 |
| S11_extracted_k141_45673    | 1052  | NA | 0   | 0 | Not-determined | Genome-fragment | NA   | 0 |
| S11_extracted_k141_78350    | 1012  | NA | 0   | 0 | Not-determined | Genome-fragment | NA   | 0 |
| S11_extracted_k141_19277    | 1658  | NA | 0   | 0 | Not-determined | Genome-fragment | NA   | 0 |
| S11_extracted_k141_65366    | 1302  | NA | 0   | 2 | Not-determined | Genome-fragment | NA   | 0 |
| S11_extracted_k141_45707    | 7039  | NA | 0   | 0 | Not-determined | Genome-fragment | NA   | 0 |
| S11_extracted_k141_58798    | 1722  | NA | 0   | 0 | Not-determined | Genome-fragment | NA   | 0 |
| S11_extracted_k141_91455    | 1020  | NA | 0   | 2 | Not-determined | Genome-fragment | NA   | 0 |
| S11_extracted_k141_6724     | 2253  | NA | 0   | 1 | Not-determined | Genome-fragment | NA   | 0 |
| S11_extracted_k141_58810    | 2027  | NA | 0   | 0 | Not-determined | Genome-fragment | NA   | 0 |
| S17_vs_k141_68813   full    | 1153  | NA | 0   | 0 | Low-quality    | Genome-fragment | 2.69 | 0 |
| S9_vs_k141_23189   full     | 1153  | NA | 2   | 0 | Low-quality    | Genome-fragment | 2.51 | 0 |
| S11_extracted_k141_78408    | 1305  | NA | 0   | 2 | Not-determined | Genome-fragment | NA   | 0 |
| S11_extracted_k141_39325    | 2033  | NA | 0   | 0 | Not-determined | Genome-fragment | NA   | 0 |
| S14_extracted_k141_92527    | 1153  | NA | 0   | 0 | Low-quality    | Genome-fragment | 0.92 | 0 |
| S1_vs_k141_100373   full    | 1153  | NA | 1   | 0 | Low-quality    | Genome-fragment | 1.58 | 0 |
| S11_extracted_k141_19840    | 1194  | NA | 0   | 0 | Not-determined | Genome-fragment | NA   | 0 |
| S11_extracted_k141_84982    | 1589  | NA | 0   | 0 | Not-determined | Genome-fragment | NA   | 0 |
| S3_extracted_k141_9318      | 1153  | NA | 0   | 0 | Low-quality    | Genome-fragment | 1.75 | 0 |
| S11_extracted_k141_91514    | 1247  | NA | 0   | 1 | Not-determined | Genome-fragment | NA   | 0 |
| S11_extracted_k141_26374    | 1612  | NA | 0   | 0 | Not-determined | Genome-fragment | NA   | 0 |
| S11_extracted_k141_45751    | 1271  | NA | 0   | 0 | Not-determined | Genome-fragment | NA   | 0 |
| S8_extracted_k141_36495     | 1153  | NA | 0   | 0 | Low-quality    | Genome-fragment | 0.65 | 0 |
| S11_extracted_k141_51528    | 1647  | NA | 0   | 0 | Not-determined | Genome-fragment | NA   | 0 |
| S3_vs_k141_78702   H2gene   | 1153  | NA | 1   | 0 | Low-quality    | Genome-fragment | 0.74 | 0 |
| S11_extracted_k141_19884    | 3116  | NA | 0   | 2 | Not-determined | Genome-fragment | NA   | 0 |
| S11_extracted_k141_16403    | 1610  | NA | 0   | 0 | Not-determined | Genome-fragment | NA   | 0 |
| S5_extracted_k141_287       | 1153  | NA | 1   | 0 | Low-quality    | Genome-fragment | 3.35 | 0 |
| S11_extracted_k141_39400    | 2668  | NA | 0   | 2 | Not-determined | Genome-fragment | NA   | 0 |
| S11_extracted_k141_85051    | 1304  | NA | 0   | 0 | Not-determined | Genome-fragment | NA   | 0 |
| S11_extracted_k141_78504    | 3191  | NA | 0   | 2 | Not-determined | Genome-fragment | NA   | 0 |
| S11_extracted_k141_6824     | 4614  | NA | 0   | 0 | Not-determined | Genome-fragment | NA   | 0 |
| S11_extracted_k141_45810    | 1316  | NA | 0   | 0 | Not-determined | Genome-fragment | NA   | 0 |
| S7_vs_80961   full          | 1153  | NA | 1   | 0 | Low-quality    | Genome-fragment | 2.12 | 0 |
| S11_extracted_k141_6846     | 1202  | NA | 0   | 1 | Not-determined | Genome-fragment | NA   | 0 |
| S16_extracted_168310        | 1153  | NA | 0   | 0 | Low-quality    | Genome-fragment | 3.04 | 0 |
| S16_vs_54099   full         | 1153  | NA | 1   | 0 | Low-quality    | Genome-fragment | 2.36 | 0 |
| S16_vs_130652   H2gene      | 1153  | NA | 1   | 0 | Low-quality    | Genome-fragment | 0.8  | 0 |
| S11_extracted_k141_633      | 1329  | NA | 0   | 0 | Not-determined | Genome-fragment | NA   | 0 |
| S11_extracted_k141_78593    | 1461  | NA | 0   | 2 | Not-determined | Genome-fragment | NA   | 0 |
| S11_extracted_k141_71993    | 1219  | NA | 0   | 3 | Not-determined | Genome-fragment | NA   | 0 |
| S10_extracted_67249         | 1153  | NA | 0   | 0 | Low-quality    | Genome-fragment | 1.45 | 0 |
| S10_vs_66379   full         | 1153  | NA | 1   | 0 | Low-quality    | Genome-fragment | 2.36 | 0 |
| S11_extracted_k141_12326    | 7845  | NA | 0   | 1 | Not-determined | Genome-fragment | NA   | 0 |
| S11_extracted_k141_45926    | 2077  | NA | 0   | 0 | Not-determined | Genome-fragment | NA   | 0 |
| S12_vs_k141_112426   full   | 1153  | NA | 0   | 1 | Low-quality    | Genome-fragment | 0.67 | 0 |
| S6_extracted_k141_38142     | 1153  | NA | 0   | 0 | Low-quality    | Genome-fragment | 2.54 | 0 |
| S17_vs_k141_156772   full   | 1154  | NA | 0   | 0 | Low-quality    | Genome-fragment | 2.32 | 0 |
| S11_extracted_k141_45939    | 3349  | NA | 0   | 2 | Not-determined | Genome-fragment | NA   | 0 |
| S11_extracted_k141_29557    | 1289  | NA | 0   | 0 | Not-determined | Genome-fragment | NA   | 0 |
| S11_extracted_k141_66113    | 1154  | NA | 2   | 0 | Low-quality    | Genome-fragment | 2.03 | 0 |
| S11_vs_k141_15787   full    | 1154  | NA | 0   | 0 | Low-quality    | Genome-fragment | 2.7  | 0 |
| S12_extracted_37506         | 1154  | NA | 0   | 2 | Low-quality    | Genome-fragment | 0.6  | 0 |
| S11_extracted_k141_703      | 1047  | NA | 0   | 0 | Not-determined | Genome-fragment | NA   | 0 |
| S5_vs_k141_33345   full     | 1154  | NA | 0</ |   |                |                 |      |   |



|                           |       |    |    |    |   |                |                 |       |   |   |
|---------------------------|-------|----|----|----|---|----------------|-----------------|-------|---|---|
| S11_extracted_k141_842    | 1929  | No | NA | 0  | 2 | Not-determined | Genome-fragment | NA    |   | 0 |
| S1_vs_k141_39887  full    | 1155  | No | NA | 0  | 1 | Low-quality    | Genome-fragment | 1.75  | 0 |   |
| S3_vs_k141_91466  full    | 1155  | No | NA | 2  | 0 | Low-quality    | Genome-fragment | 1.45  | 0 |   |
| S11_extracted_k141_65695  | 2244  | No | NA | 0  | 0 | Not-determined | Genome-fragment | NA    |   | 0 |
| S5_vs_k141_133720  H2gene | 1155  | No | NA | 0  | 0 | Low-quality    | Genome-fragment | 3.22  | 0 |   |
| S11_extracted_k141_59071  | 2669  | No | NA | 0  | 1 | Not-determined | Genome-fragment | NA    |   | 0 |
| S7_extracted_12927        | 1155  | No | NA | 0  | 1 | Low-quality    | Genome-fragment | 2.07  | 0 |   |
| S11_extracted_k141_13559  | 3022  | No | NA | 0  | 0 | Not-determined | Genome-fragment | NA    |   | 0 |
| S7_vs_47519  full         | 1155  | No | NA | 0  | 0 | Low-quality    | Genome-fragment | 1.12  | 0 |   |
| S11_extracted_k141_33253  | 10572 | No | NA | 0  | 2 | Not-determined | Genome-fragment | NA    |   | 0 |
| S11_extracted_k141_46244  | 1206  | No | NA | 0  | 1 | Not-determined | Genome-fragment | NA    |   | 0 |
| S11_extracted_k141_4637   | 4657  | No | NA | 0  | 0 | Not-determined | Genome-fragment | NA    |   | 0 |
| S16_extracted_169289      | 1155  | No | NA | 0  | 2 | Low-quality    | Genome-fragment | 2.06  | 0 |   |
| S11_extracted_k141_7050   | 4088  | No | NA | 0  | 2 | Not-determined | Genome-fragment | NA    |   | 0 |
| S11_extracted_k141_85456  | 1042  | No | NA | 0  | 1 | Not-determined | Genome-fragment | NA    |   | 0 |
| S16_vs_124138  full       | 1155  | No | NA | 0  | 0 | Low-quality    | Genome-fragment | 1.31  | 0 |   |
| S10_vs_103769  full       | 1155  | No | NA | 1  | 0 | Low-quality    | Genome-fragment | 2.28  | 0 |   |
| S12_extracted_k141_53375  | 1155  | No | NA | 0  | 0 | Low-quality    | Genome-fragment | 3.12  | 0 |   |
| S11_extracted_k141_29827  | 2372  | No | NA | 0  | 1 | Not-determined | Genome-fragment | NA    |   | 0 |
| S11_extracted_k141_46334  | 1142  | No | NA | 0  | 0 | Not-determined | Genome-fragment | NA    |   | 0 |
| S11_extracted_k141_46338  | 1720  | No | NA | 0  | 2 | Not-determined | Genome-fragment | NA    |   | 0 |
| S11_extracted_k141_65804  | 2152  | No | NA | 0  | 0 | Not-determined | Genome-fragment | NA    |   | 0 |
| S11_extracted_k141_65814  | 1078  | No | NA | 0  | 0 | Not-determined | Genome-fragment | NA    |   | 0 |
| S12_vs_k141_18455  full   | 1155  | No | NA | 0  | 1 | Low-quality    | Genome-fragment | 2.59  | 0 |   |
| S11_extracted_k141_46370  | 1112  | No | NA | 0  | 2 | Not-determined | Genome-fragment | NA    |   | 0 |
| S12_vs_k141_72008  full   | 1155  | No | NA | 0  | 0 | Low-quality    | Genome-fragment | 2.35  | 0 |   |
| S11_extracted_k141_1059   | 2401  | No | NA | 0  | 0 | Not-determined | Genome-fragment | NA    |   | 0 |
| S11_extracted_k141_92052  | 1020  | No | NA | 0  | 1 | Not-determined | Genome-fragment | NA    |   | 0 |
| S11_extracted_k141_53862  | 2151  | No | NA | 0  | 1 | Not-determined | Genome-fragment | NA    |   | 0 |
| S11_extracted_k141_1069   | 7194  | No | NA | 0  | 5 | Not-determined | Genome-fragment | NA    |   | 0 |
| S11_extracted_k141_33410  | 3095  | No | NA | 0  | 1 | Not-determined | Genome-fragment | NA    |   | 0 |
| S12_vs_k141_53642  H2gene | 1155  | No | NA | 0  | 0 | Low-quality    | Genome-fragment | 0.63  | 0 |   |
| S11_extracted_k141_98610  | 1354  | No | NA | 0  | 1 | Not-determined | Genome-fragment | NA    |   | 0 |
| S8_extracted_k141_84220   | 1155  | No | NA | 0  | 1 | Low-quality    | Genome-fragment | 2.58  | 0 |   |
| S8_vs_k141_62168  full    | 1155  | No | NA | 0  | 1 | Low-quality    | Genome-fragment | 1.98  | 0 |   |
| S11_extracted_k141_98636  | 1002  | No | NA | 0  | 1 | Not-determined | Genome-fragment | NA    |   | 0 |
| S11_extracted_k141_85620  | 1309  | No | NA | 0  | 2 | Not-determined | Genome-fragment | NA    |   | 0 |
| S8_vs_k141_142732  full   | 1155  | No | NA | 0  | 2 | Low-quality    | Genome-fragment | 0.77  | 0 |   |
| S11_extracted_k141_46429  | 1319  | No | NA | 0  | 0 | Not-determined | Genome-fragment | NA    |   | 0 |
| S11_extracted_k141_85629  | 2803  | No | NA | 0  | 0 | Not-determined | Genome-fragment | NA    |   | 0 |
| S11_extracted_k141_52958  | 4896  | No | NA | 0  | 2 | Not-determined | Genome-fragment | NA    |   | 0 |
| S11_extracted_k141_7239   | 1171  | No | NA | 0  | 1 | Not-determined | Genome-fragment | NA    |   | 0 |
| S8_vs_k141_127699  full   | 1155  | No | NA | 0  | 0 | Low-quality    | Genome-fragment | 1.84  | 0 |   |
| S11_extracted_k141_7248   | 1145  | No | NA | 0  | 0 | Not-determined | Genome-fragment | NA    |   | 0 |
| S11_extracted_k141_65889  | 1223  | No | NA | 0  | 0 | Not-determined | Genome-fragment | NA    |   | 0 |
| S11_extracted_k141_12977  | 1258  | No | NA | 0  | 1 | Not-determined | Genome-fragment | NA    |   | 0 |
| S8_vs_k141_120135  full   | 1155  | No | NA | 0  | 0 | Low-quality    | Genome-fragment | 2.94  | 0 |   |
| S11_extracted_k141_79209  | 1733  | No | NA | 0  | 3 | Not-determined | Genome-fragment | NA    |   | 0 |
| S11_extracted_k141_33433  | 77933 | No | NA | 13 | 1 | Complete       | Genome-fragment | 100   | 0 |   |
| S11_extracted_k141_46482  | 1006  | No | NA | 0  | 1 | Not-determined | Genome-fragment | NA    |   | 0 |
| S11_extracted_k141_65966  | 3910  | No | NA | 0  | 1 | Not-determined | Genome-fragment | NA    |   | 0 |
| S17_extracted_k141_69129  | 1156  | No | NA | 0  | 1 | Low-quality    | Genome-fragment | 2.61  | 0 |   |
| S11_extracted_k141_7335   | 3375  | No | NA | 0  | 2 | Not-determined | Genome-fragment | NA    |   | 0 |
| S11_extracted_k141_40007  | 1338  | No | NA | 0  | 0 | Not-determined | Genome-fragment | NA    |   | 0 |
| S17_vs_k141_15995  full   | 1156  | No | NA | 0  | 0 | Low-quality    | Genome-fragment | 1.15  | 0 |   |
| S11_extracted_k141_66001  | 5807  | No | NA | 0  | 0 | Not-determined | Genome-fragment | NA    |   | 0 |
| S11_extracted_k141_72691  | 1070  | No | NA | 0  | 1 | Not-determined | Genome-fragment | NA    |   | 0 |
| S11_extracted_k141_92196  | 2226  | No | NA | 0  | 3 | Not-determined | Genome-fragment | NA    |   | 0 |
| S11_extracted_k141_79267  | 1219  | No | NA | 0  | 0 | Not-determined | Genome-fragment | NA    |   | 0 |
| S11_extracted_k141_7400   | 1653  | No | NA | 0  | 0 | Not-determined | Genome-fragment | NA    |   | 0 |
| S11_extracted_k141_33099  | 2880  | No | NA | 0  | 1 | Not-determined | Genome-fragment | NA    |   | 0 |
| S11_extracted_k141_53110  | 3815  | No | NA | 0  | 1 | Not-determined | Genome-fragment | NA    |   | 0 |
| S11_extracted_k141_27020  | 1222  | No | NA | 0  | 1 | Not-determined | Genome-fragment | NA    |   | 0 |
| S11_extracted_k141_7442   | 12013 | No | NA | 0  | 4 | Not-determined | Genome-fragment | NA    |   | 0 |
| S11_extracted_k141_53165  | 1758  | No | NA | 0  | 2 | Not-determined | Genome-fragment | NA    |   | 0 |
| S11_extracted_k141_53186  | 4689  | No | NA | 0  | 1 | Not-determined | Genome-fragment | NA    |   | 0 |
| S17_vs_k141_50957  full   | 1156  | No | NA | 0  | 0 | Low-quality    | Genome-fragment | 2.47  | 0 |   |
| S11_extracted_k141_79342  | 1259  | No | NA | 0  | 1 | Not-determined | Genome-fragment | NA    |   | 0 |
| S11_extracted_k141_40129  | 2977  | No | NA | 0  | 1 | Not-determined | Genome-fragment | NA    |   | 0 |
| S9_vs_k141_38100  full    | 1156  | No | NA | 0  | 0 | Low-quality    | Genome-fragment | 0.67  | 0 |   |
| S11_extracted_k141_33661  | 1113  | No | NA | 0  | 1 | Not-determined | Genome-fragment | NA    |   | 0 |
| S11_extracted_k141_66148  | 1289  | No | NA | 0  | 1 | Not-determined | Genome-fragment | NA    |   | 0 |
| S9_vs_k141_89126  full    | 1156  | No | NA | 1  | 0 | Low-quality    | Genome-fragment | 3.05  | 0 |   |
| S11_extracted_k141_7534   | 4233  | No | NA | 0  | 2 | Not-determined | Genome-fragment | NA    |   | 0 |
| S11_extracted_k141_7536   | 1716  | No | NA | 0  | 1 | Not-determined | Genome-fragment | NA    |   | 0 |
| S9_vs_k141_72840  H2gene  | 1156  | No | NA | 1  | 0 | Low-quality    | Genome-fragment | 2.66  | 0 |   |
| S11_extracted_k141_1317   | 1151  | No | NA | 0  | 3 | Not-determined | Genome-fragment | NA    |   | 0 |
| S11_extracted_k141_53558  | 1156  | No | NA | 1  | 0 | Low-quality    | Genome-fragment | 0.79  | 0 |   |
| S11_extracted_k141_5328   | 1151  | No | NA | 0  | 0 | Not-determined | Genome-fragment | NA    |   | 0 |
| S13_vs_141710  full       | 1156  | No | NA | 0  | 1 | Low-quality    | Genome-fragment | 2     | 0 |   |
| S14_extracted_k141_100417 | 1156  | No | NA | 1  | 0 | Low-quality    | Genome-fragment | 2.71  | 0 |   |
| S11_extracted_k141_66160  | 56970 | No | NA | 13 | 1 | High-quality   | Genome-fragment | 100   | 0 |   |
| S1_vs_k141_144315  full   | 1156  | No | NA | 0  | 0 | Low-quality    | Genome-fragment | 2.94  | 0 |   |
| S11_extracted_k141_20813  | 1902  | No | NA | 0  | 2 | Not-determined | Genome-fragment | NA    |   | 0 |
| S11_extracted_k141_23219  | 2152  | No | NA | 0  | 1 | Not-determined | Genome-fragment | NA    |   | 0 |
| S11_extracted_k141_72985  | 1054  | No | NA | 0  | 0 | Not-determined | Genome-fragment | NA    |   | 0 |
| S11_extracted_k141_59708  | 1080  | No | NA | 0  | 0 | Not-determined | Genome-fragment | NA    |   | 0 |
| S8_vs_k141_8882  full     | 1156  | No | NA | 0  | 1 | Low-quality    | Genome-fragment | 1.52  | 0 |   |
| S3_vs_k141_11023  full    | 1156  | No | NA | 0  | 1 | Low-quality    | Genome-fragment | 0.68  | 0 |   |
| S5_vs_k141_458  H2gene    | 1156  | No | NA | 1  | 0 | Low-quality    | Genome-fragment | 1.96  | 0 |   |
| S7_extracted_8118         | 1156  | No | NA | 0  | 0 | Low-quality    | Genome-fragment | 1.13  | 0 |   |
| S11_extracted_k141_20878  | 1001  | No | NA | 0  | 2 | Not-determined | Genome-fragment | NA    |   | 0 |
| S11_extracted_k141_27236  | 1002  | No | NA | 0  | 1 | Not-determined | Genome-fragment | NA    |   | 0 |
| S11_extracted_k141_40221  | 1468  | No | NA | 0  | 1 | Not-determined | Genome-fragment | NA    |   | 0 |
| S11_extracted_k141_27741  | 1866  | No | NA | 0  | 1 | Not-determined | Genome-fragment | NA    |   | 0 |
| S16_vs_24111  full        | 1156  | No | NA | 0  | 0 | Low-quality    | Genome-fragment | 1.25  | 0 |   |
| S11_extracted_k141_1494   | 1064  | No | NA | 0  | 1 | Not-determined | Genome-fragment | NA    |   | 0 |
| S11_extracted_k141_80807  | 4605  | No | NA | 0  | 2 | Not-determined | Genome-fragment | NA    |   | 0 |
| S11_extracted_k141_33774  | 2045  | No | NA | 0  | 1 | Not-determined | Genome-fragment | NA    |   | 0 |
| S11_extracted_k141_92391  | 15893 | No | NA | 7  | 0 | Medium-quality | Genome-fragment | 52.52 | 0 |   |
| S11_extracted_k141_20907  | 1597  | No | NA | 0  | 0 | Not-determined | Genome-fragment | NA    |   | 0 |
| S11_extracted_k141_92386  | 1328  | No | NA | 0  | 0 | Not-determined | Genome-fragment | NA    |   | 0 |
| S12_vs_k141_1138  full    | 1156  | No | NA | 0  | 0 | Low-quality    | Genome-fragment | 1.97  | 0 |   |
| S11_extracted_k141_79449  | 1032  | No | NA | 0  | 1 | Not-determined | Genome-fragment | NA    |   | 0 |
| S11_extracted_k141_66742  | 5120  | No | NA | 0  | 1 | Not-determined | Genome-fragment | NA    |   | 0 |
| S12_vs_k141_1548  full    | 1156  | No | NA | 0  | 0 | Low-quality    | Genome-fragment | 1.38  | 0 |   |
| S11_extracted_k141_59774  | 1165  | No | NA | 0  | 1 | Not-determined | Genome-fragment | NA    |   | 0 |
| S15_extracted_5318        | 1156  | No | NA | 0  | 0 | Low-quality    | Genome-fragment | 0.82  | 0 |   |
| S4_extracted_9057         | 1156  | No | NA | 0  | 0 | Low-quality    | Genome-fragment | 1.22  | 0 |   |
| S11_extracted_k141_27297  | 1425  | No | NA | 0  | 2 | Not-determined | Genome-fragment | NA    |   | 0 |
| S8_vs_k141_9170  H2gene   | 1156  | No | NA | 1  | 0 | Low-quality    | Genome-fragment | 1.95  | 0 |   |
| S11_extracted_k141_46758  | 1842  | No | NA | 0  | 0 | Not-determined | Genome-fragment | NA    |   | 0 |
| S11_extracted_k141_99014  | 1989  | No | NA | 0  | 1 | Not-determined | Genome-fragment | NA    |   | 0 |
| S11_extracted_k141_73154  | 4914  | No | NA | 0  | 3 | Not-determined | Genome-fragment | NA    |   | 0 |
| S17_vs_k141_170922  full  | 1157  | No | NA | 0  | 0 | Low-quality    | Genome-fragment | 0.82  | 0 |   |
| S11_extracted_k141_100340 | 1157  | No | NA | 1  | 0 | Low-quality    | Genome-fragment | 0.81  | 0 |   |
| S11_extracted_k141_1605   | 1038  | No | NA | 0  | 0 | Not-determined | Genome-fragment | NA    |   | 0 |
| S11_extracted_k141_27335  | 12489 | No | NA | 0  | 0 | Not-determined | Genome-fragment | NA    |   | 0 |
| S11_vs_k141_778  full     | 1157  | No | NA | 0  | 0 | Low-quality    | Genome-fragment | 7.36  | 0 |   |
| S11_vs_k141_74087  full   | 1157  | No | NA | 0  | 0 | Low-quality    | Genome-fragment | 2.29  | 0 |   |
| S11_extracted_k141_90405  | 3480  | No | NA | 0  | 1 | Not-determined | Genome-fragment | NA    |   | 0 |
| S11_extracted_k141_14040  | 3145  | No | NA | 0  | 2 | Not-determined | Genome-fragment | NA    |   | 0 |
| S11_extracted_k141_86211  | 4231  | No | NA | 0  | 1 | Not-determined | Genome-fragment | NA    |   | 0 |
| S13_extracted_151423      | 1157  | No | NA | 0  | 1 | Low-quality    | Genome-fragment | 0.51  | 0 |   |
| S11_extracted_k141_14072  | 1455  | No | NA | 0  | 2 | Not-determined | Genome-fragment | NA    |   | 0 |
| S11_extracted_k141_27391  | 2140  | No | NA | 0  | 0 | Not-determined | Genome-fragment | NA    |   | 0 |
| S11_extracted_k141_27395  | 1026  | No | NA | 0  | 0 | Not-determined | Genome-fragment | NA    |   | 0 |
| S3_vs_k141_20908  full    | 1157  | No | NA | 0  | 1 | Low-quality    | Genome-fragment | 2.21  | 0 |   |
| S11_extracted_k141_21034  | 2249  | No | NA | 0  | 0 | Not-determined | Genome-fragment | NA    |   | 0 |
| S11_extracted_k141_53524  | 1237  | No | NA | 0  | 1 | Not-determined | Genome-fragment | NA    |   | 0 |
| S11_extracted_k141_21059  | 1014  | No | NA | 0  | 0 | Not-determined | Genome-fragment | NA    |   | 0 |
| S11_extracted_k141_86314  | 1739  | No | NA | 0  | 1 | Not-determined | Genome-fragment | NA    |   | 0 |
| S11_extracted_k141_99068  | 3554  | No | NA | 0  | 0 | Not-determined | Genome-fragment | NA    |   | 0 |
| S7_extracted_63068        | 1157  | No | NA | 0  | 1 | Low-quality    | Genome-fragment | 2.34  | 0 |   |
| S11_extracted_k141_33868  | 1996  | No | NA | 0  | 1 | Not-determined | Genome-fragment | NA    |   | 0 |
| S16_vs_102148  full       | 1157  | No | NA | 0  | 1 | Low-quality    | Genome-fragment | 1.73  | 0 |   |
| S11_extracted_k141_53586  | 1723  | No | NA | 0  | 0 | Not-determined | Genome-fragment | NA    |   | 0 |
| S11_extracted_k141_33591  | 6063  | No | NA | 0  | 2 | Not-determined | Genome-fragment | NA    |   | 0 |
| S11_extracted_k141_46871  |       |    |    |    |   |                |                 |       |   |   |



|                           |       |    |    |    |   |                |                 |       |   |
|---------------------------|-------|----|----|----|---|----------------|-----------------|-------|---|
| S16_extracted_107975      | 1158  | No | NA | 0  | 0 | Low-quality    | Genome-fragment | 0.56  | 0 |
| S11_extracted_k141_33758  | 1024  | No | NA | 1  | 0 | Not-determined | Genome-fragment | NA    | 0 |
| S11_extracted_k141_47124  | 3784  | No | NA | 0  | 3 | Not-determined | Genome-fragment | NA    | 0 |
| S11_extracted_k141_40509  | 1419  | No | NA | 0  | 1 | Not-determined | Genome-fragment | NA    | 0 |
| S11_extracted_k141_99255  | 1210  | No | NA | 0  | 1 | Not-determined | Genome-fragment | NA    | 0 |
| S11_extracted_k141_60072  | 13510 | No | NA | 0  | 3 | Not-determined | Genome-fragment | NA    | 0 |
| S11_extracted_k141_27813  | 1190  | No | NA | 0  | 1 | Not-determined | Genome-fragment | NA    | 0 |
| S11_extracted_k141_40546  | 1513  | No | NA | 0  | 0 | Not-determined | Genome-fragment | NA    | 0 |
| S12_vs_k141_40531[full]   | 1158  | No | NA | 0  | 0 | Low-quality    | Genome-fragment | 2.87  | 0 |
| S12_vs_k141_81249[full]   | 1158  | No | NA | 0  | 1 | Low-quality    | Genome-fragment | 0.3   | 0 |
| S11_extracted_k141_21396  | 4666  | No | NA | 0  | 0 | Not-determined | Genome-fragment | NA    | 0 |
| S2_extracted_k141_14126   | 1158  | No | NA | 0  | 0 | Low-quality    | Genome-fragment | 1.21  | 0 |
| S11_extracted_k141_66655  | 1439  | No | NA | 0  | 0 | Not-determined | Genome-fragment | NA    | 0 |
| S11_extracted_k141_53833  | 1290  | No | NA | 0  | 1 | Not-determined | Genome-fragment | NA    | 0 |
| S11_extracted_k141_47144  | 1378  | No | NA | 0  | 1 | Not-determined | Genome-fragment | NA    | 0 |
| S2_vs_k141_15627[full]    | 1158  | No | NA | 0  | 0 | Low-quality    | Genome-fragment | 1.7   | 0 |
| S4_extracted_31092        | 1158  | No | NA | 1  | 0 | Low-quality    | Genome-fragment | 2.06  | 0 |
| S11_extracted_k141_47177  | 1300  | No | NA | 0  | 1 | Not-determined | Genome-fragment | NA    | 0 |
| S11_extracted_k141_99342  | 1015  | No | NA | 0  | 2 | Not-determined | Genome-fragment | NA    | 0 |
| S11_extracted_k141_33919  | 2717  | No | NA | 0  | 3 | Not-determined | Genome-fragment | NA    | 0 |
| S11_extracted_k141_53889  | 4381  | No | NA | 0  | 2 | Not-determined | Genome-fragment | NA    | 0 |
| S11_extracted_k141_27845  | 60409 | No | NA | 8  | 0 | High-quality   | Genome-fragment | 95.09 | 0 |
| S8_vs_k141_180324[full]   | 1158  | No | NA | 0  | 0 | Low-quality    | Genome-fragment | 1.58  | 0 |
| S11_extracted_k141_47215  | 2802  | No | NA | 0  | 0 | Not-determined | Genome-fragment | NA    | 0 |
| S11_extracted_k141_52779  | 1129  | No | NA | 0  | 0 | Not-determined | Genome-fragment | NA    | 0 |
| S17_extracted_k141_60079  | 1159  | No | NA | 0  | 1 | Low-quality    | Genome-fragment | 1.43  | 0 |
| S11_extracted_k141_86572  | 1317  | No | NA | 0  | 1 | Not-determined | Genome-fragment | NA    | 0 |
| S9_vs_k141_84680[full]    | 1159  | No | NA | 0  | 0 | Low-quality    | Genome-fragment | 0.67  | 0 |
| S9_vs_k141_65710[full]    | 1159  | No | NA | 0  | 0 | Low-quality    | Genome-fragment | 3.01  | 0 |
| S11_extracted_k141_8373   | 1135  | No | NA | 0  | 0 | Not-determined | Genome-fragment | NA    | 0 |
| S11_extracted_k141_73606  | 7868  | No | NA | 0  | 2 | Not-determined | Genome-fragment | NA    | 0 |
| S11_extracted_k141_21555  | 2289  | No | NA | 0  | 0 | Not-determined | Genome-fragment | NA    | 0 |
| S14_extracted_k141_48525  | 1159  | No | NA | 0  | 1 | Low-quality    | Genome-fragment | 0.39  | 0 |
| S11_extracted_k141_2087   | 3565  | No | NA | 0  | 0 | Not-determined | Genome-fragment | NA    | 0 |
| S1_vs_k141_72493[full]    | 1159  | No | NA | 0  | 1 | Low-quality    | Genome-fragment | 1.1   | 0 |
| S11_extracted_k141_40681  | 1159  | No | NA | 0  | 1 | Not-determined | Genome-fragment | NA    | 0 |
| S11_extracted_k141_53988  | 1857  | No | NA | 0  | 1 | Not-determined | Genome-fragment | NA    | 0 |
| S5_vs_k141_68194[full]    | 1159  | No | NA | 0  | 0 | Low-quality    | Genome-fragment | 2.44  | 0 |
| S11_extracted_k141_92796  | 1983  | No | NA | 1  | 0 | Not-determined | Genome-fragment | NA    | 0 |
| S11_extracted_k141_54012  | 1680  | No | NA | 0  | 2 | Not-determined | Genome-fragment | NA    | 0 |
| S11_extracted_k141_54014  | 1650  | No | NA | 0  | 1 | Not-determined | Genome-fragment | NA    | 0 |
| S11_extracted_k141_5430   | 1454  | No | NA | 0  | 1 | Not-determined | Genome-fragment | NA    | 0 |
| S11_extracted_k141_40715  | 1597  | No | NA | 0  | 1 | Not-determined | Genome-fragment | NA    | 0 |
| S11_extracted_k141_34008  | 27571 | No | NA | 12 | 0 | Medium-quality | Genome-fragment | 57.97 | 0 |
| S11_extracted_k141_86695  | 5588  | No | NA | 0  | 1 | Not-determined | Genome-fragment | NA    | 0 |
| S11_extracted_k141_86707  | 1466  | No | NA | 0  | 0 | Not-determined | Genome-fragment | NA    | 0 |
| S11_extracted_k141_14595  | 1068  | No | NA | 0  | 0 | Not-determined | Genome-fragment | NA    | 0 |
| S7_extracted_13529        | 1159  | No | NA | 1  | 0 | Low-quality    | Genome-fragment | 2.67  | 0 |
| S11_extracted_k141_40783  | 1440  | No | NA | 0  | 1 | Not-determined | Genome-fragment | NA    | 0 |
| S11_extracted_k141_27953  | 5256  | No | NA | 0  | 3 | Not-determined | Genome-fragment | NA    | 0 |
| S7_vs_38541[full]         | 1159  | No | NA | 1  | 0 | Low-quality    | Genome-fragment | 2.92  | 0 |
| S11_extracted_k141_71692  | 1120  | No | NA | 0  | 1 | Not-determined | Genome-fragment | NA    | 0 |
| S11_extracted_k141_86736  | 3513  | No | NA | 0  | 0 | Not-determined | Genome-fragment | NA    | 0 |
| S12_extracted_k141_145385 | 1159  | No | NA | 1  | 0 | Low-quality    | Genome-fragment | 2.73  | 0 |
| S11_extracted_k141_99562  | 1789  | No | NA | 0  | 2 | Not-determined | Genome-fragment | NA    | 0 |
| S11_extracted_k141_93887  | 5261  | No | NA | 0  | 0 | Not-determined | Genome-fragment | NA    | 0 |
| S11_extracted_k141_99565  | 1028  | No | NA | 0  | 1 | Not-determined | Genome-fragment | NA    | 0 |
| S11_extracted_k141_99578  | 1047  | No | NA | 0  | 1 | Not-determined | Genome-fragment | NA    | 0 |
| S11_extracted_k141_34082  | 1218  | No | NA | 0  | 0 | Not-determined | Genome-fragment | NA    | 0 |
| S11_extracted_k141_8512   | 1378  | No | NA | 0  | 0 | Not-determined | Genome-fragment | NA    | 0 |
| S11_extracted_k141_73735  | 1311  | No | NA | 0  | 1 | Not-determined | Genome-fragment | NA    | 0 |
| S11_extracted_k141_21656  | 1209  | No | NA | 0  | 1 | Not-determined | Genome-fragment | NA    | 0 |
| S12_vs_k141_15638[full]   | 1159  | No | NA | 1  | 0 | Low-quality    | Genome-fragment | 2.08  | 0 |
| S12_vs_k141_150129[full]  | 1159  | No | NA | 2  | 0 | Low-quality    | Genome-fragment | 1.43  | 0 |
| S11_extracted_k141_34112  | 3707  | No | NA | 0  | 2 | Not-determined | Genome-fragment | NA    | 0 |
| S11_extracted_k141_54156  | 1725  | No | NA | 0  | 1 | Not-determined | Genome-fragment | NA    | 0 |
| S11_extracted_k141_73794  | 1004  | No | NA | 0  | 0 | Not-determined | Genome-fragment | NA    | 0 |
| S15_extracted_36576       | 1159  | No | NA | 0  | 2 | Low-quality    | Genome-fragment | 0.88  | 0 |
| S11_extracted_k141_99619  | 1403  | No | NA | 0  | 0 | Not-determined | Genome-fragment | NA    | 0 |
| S11_extracted_k141_21727  | 1151  | No | NA | 0  | 1 | Not-determined | Genome-fragment | NA    | 0 |
| S11_extracted_k141_99652  | 1659  | No | NA | 0  | 1 | Not-determined | Genome-fragment | NA    | 0 |
| S6_vs_k141_123289[full]   | 1159  | No | NA | 0  | 0 | Low-quality    | Genome-fragment | 2.54  | 0 |
| S8_extracted_k141_45249   | 1159  | No | NA | 0  | 0 | Low-quality    | Genome-fragment | 0.57  | 0 |
| S8_extracted_k141_68741   | 1159  | No | NA | 1  | 0 | Low-quality    | Genome-fragment | 2.63  | 0 |
| S11_extracted_k141_66801  | 3201  | No | NA | 0  | 1 | Not-determined | Genome-fragment | NA    | 0 |
| S11_extracted_k141_99734  | 1475  | No | NA | 0  | 1 | Not-determined | Genome-fragment | NA    | 0 |
| S11_extracted_k141_8654   | 1063  | No | NA | 0  | 1 | Not-determined | Genome-fragment | NA    | 0 |
| S11_extracted_k141_34224  | 35904 | No | NA | 26 | 0 | Complete       | High-quality    | 100   | 0 |
| S8_vs_k141_146534[full]   | 1159  | No | NA | 0  | 0 | Low-quality    | Genome-fragment | 2.77  | 0 |
| S11_extracted_k141_80275  | 3120  | No | NA | 0  | 2 | Not-determined | Genome-fragment | NA    | 0 |
| S17_extracted_k141_140779 | 1160  | No | NA | 0  | 2 | Low-quality    | Genome-fragment | 2.07  | 0 |
| S11_extracted_k141_54259  | 1392  | No | NA | 0  | 0 | Not-determined | Genome-fragment | NA    | 0 |
| S11_extracted_k141_73937  | 19612 | No | NA | 0  | 8 | Not-determined | Genome-fragment | NA    | 0 |
| S11_extracted_k141_8699   | 1143  | No | NA | 0  | 1 | Not-determined | Genome-fragment | NA    | 0 |
| S11_extracted_k141_60438  | 1538  | No | NA | 0  | 0 | Not-determined | Genome-fragment | NA    | 0 |
| S17_extracted_k141_33599  | 1160  | No | NA | 1  | 0 | Low-quality    | Genome-fragment | 3.44  | 0 |
| S14_extracted_k141_9779   | 1160  | No | NA | 2  | 0 | Low-quality    | Genome-fragment | 3.83  | 0 |
| S11_extracted_k141_2441   | 18509 | No | NA | 0  | 5 | Not-determined | Genome-fragment | NA    | 0 |
| S11_extracted_k141_54327  | 1344  | No | NA | 0  | 0 | Not-determined | Genome-fragment | NA    | 0 |
| S11_extracted_k141_28186  | 1238  | No | NA | 0  | 0 | Not-determined | Genome-fragment | NA    | 0 |
| S1_vs_k141_132280[full]   | 1160  | No | NA | 1  | 0 | Low-quality    | Genome-fragment | 1.98  | 0 |
| S11_extracted_k141_99751  | 72288 | No | NA | 12 | 0 | Medium-quality | Genome-fragment | 65.25 | 0 |
| S11_extracted_k141_66851  | 1209  | No | NA | 0  | 0 | Not-determined | Genome-fragment | NA    | 0 |
| S11_extracted_k141_28195  | 2999  | No | NA | 0  | 4 | Not-determined | Genome-fragment | NA    | 0 |
| S11_extracted_k141_97121  | 5211  | No | NA | 0  | 1 | Not-determined | Genome-fragment | NA    | 0 |
| S11_extracted_k141_54381  | 1326  | No | NA | 0  | 0 | Not-determined | Genome-fragment | NA    | 0 |
| S11_extracted_k141_87138  | 1160  | No | NA | 0  | 0 | Not-determined | Genome-fragment | NA    | 0 |
| S11_extracted_k141_68887  | 1519  | No | NA | 0  | 1 | Not-determined | Genome-fragment | NA    | 0 |
| S11_extracted_k141_14319  | 1487  | No | NA | 0  | 0 | Not-determined | Genome-fragment | NA    | 0 |
| S11_extracted_k141_14916  | 2889  | No | NA | 0  | 0 | Not-determined | Genome-fragment | NA    | 0 |
| S3_vs_k141_36306[full]    | 1160  | No | NA | 1  | 0 | Low-quality    | Genome-fragment | 2.64  | 0 |
| S3_vs_k141_1110231[full]  | 1160  | No | NA | 0  | 0 | Low-quality    | Genome-fragment | 2.39  | 0 |
| S11_extracted_k141_54393  | 17935 | No | NA | 0  | 2 | Not-determined | Genome-fragment | NA    | 0 |
| S5_vs_k141_41793[full]    | 1160  | No | NA | 1  | 0 | Low-quality    | Genome-fragment | 2.82  | 0 |
| S7_extracted_72734        | 1160  | No | NA | 0  | 0 | Low-quality    | Genome-fragment | 2.47  | 0 |
| S11_extracted_k141_8810   | 1111  | No | NA | 0  | 0 | Not-determined | Genome-fragment | NA    | 0 |
| S11_extracted_k141_54442  | 1332  | No | NA | 0  | 1 | Not-determined | Genome-fragment | NA    | 0 |
| S11_extracted_k141_21967  | 11502 | No | NA | 0  | 0 | Not-determined | Genome-fragment | NA    | 0 |
| S7_vs_100891[full]        | 1160  | No | NA | 0  | 0 | Low-quality    | Genome-fragment | 0.65  | 0 |
| S11_extracted_k141_34408  | 1367  | No | NA | 0  | 0 | Not-determined | Genome-fragment | NA    | 0 |
| S12_vs_k141_160188[full]  | 1160  | No | NA | 0  | 0 | Low-quality    | Genome-fragment | 2.24  | 0 |
| S11_extracted_k141_41251  | 1359  | No | NA | 0  | 0 | Not-determined | Genome-fragment | NA    | 0 |
| S11_extracted_k141_54483  | 1132  | No | NA | 0  | 0 | Not-determined | Genome-fragment | NA    | 0 |
| S11_extracted_k141_2582   | 1417  | No | NA | 0  | 0 | Not-determined | Genome-fragment | NA    | 0 |
| S11_extracted_k141_9721   | 1238  | No | NA | 0  | 1 | Not-determined | Genome-fragment | NA    | 0 |
| S11_extracted_k141_54504  | 1813  | No | NA | 0  | 0 | Not-determined | Genome-fragment | NA    | 0 |
| S12_vs_k141_618851[full]  | 1160  | No | NA | 0  | 0 | Low-quality    | Genome-fragment | 2.92  | 0 |
| S11_extracted_k141_15068  | 1812  | No | NA | 0  | 2 | Not-determined | Genome-fragment | NA    | 0 |
| S11_extracted_k141_47057  | 1571  | No | NA | 0  | 0 | Not-determined | Genome-fragment | NA    | 0 |
| S8_extracted_k141_69731   | 1160  | No | NA | 0  | 0 | Low-quality    | Genome-fragment | 1.41  | 0 |
| S11_extracted_k141_99943  | 4382  | No | NA | 0  | 3 | Not-determined | Genome-fragment | NA    | 0 |
| S11_extracted_k141_67030  | 6158  | No | NA | 0  | 3 | Not-determined | Genome-fragment | NA    | 0 |
| S8_extracted_k141_197521  | 1160  | No | NA | 0  | 1 | Low-quality    | Genome-fragment | 0.34  | 0 |
| S7_extracted_k141_122098  | 1161  | No | NA | 0  | 3 | Low-quality    | Genome-fragment | 2.47  | 0 |
| S9_vs_k141_76359[full]    | 1161  | No | NA | 0  | 0 | Low-quality    | Genome-fragment | 2.01  | 0 |
| S11_extracted_k141_67055  | 1404  | No | NA | 0  | 0 | Not-determined | Genome-fragment | NA    | 0 |
| S13_vs_144237[full]       | 1161  | No | NA | 1  | 0 | Low-quality    | Genome-fragment | 1.13  | 0 |
| S11_extracted_k141_93354  | 2089  | No | NA | 0  | 4 | Not-determined | Genome-fragment | NA    | 0 |
| S11_extracted_k141_93355  | 1019  | No | NA | 0  | 0 | Not-determined | Genome-fragment | NA    | 0 |
| S11_extracted_k141_34501  | 1936  | No | NA | 0  | 0 | Not-determined | Genome-fragment | NA    | 0 |
| S14_vs_k141_71621[full]   | 1161  | No | NA | 0  | 0 | Low-quality    | Genome-fragment | 2.02  | 0 |
| S11_extracted_k141_74200  | 1479  | No | NA | 0  | 0 | Not-determined | Genome-fragment | NA    | 0 |
| S11_extracted_k141_44115  | 1161  | No | NA | 0  | 1 | Low-quality    | Genome-fragment | 2     | 0 |
| S11_extracted_k141_8946   | 5632  | No | NA | 0  | 3 | Not-determined | Genome-fragment | NA    | 0 |
| S5_extracted_k141_1314763 | 1161  | No | NA | 0  | 0 | Low-quality    | Genome-fragment | 1.44  | 0 |
| S11_extracted_k141_15133  | 1099  | No | NA | 0  | 0 | Not-determined | Genome-fragment | NA    | 0 |
| S11_extracted_k141_54611  | 1128  | No | NA | 0  | 1 | Not-determined | Genome-fragment | NA    | 0 |
| S5_extracted_k141_22198   | 1161  | No | NA | 2  | 0 | Low-quality    | Genome-fragment | 5.39  | 0 |
| S11_extracted_k141_15178  | 1176  | No | NA | 0  | 1 | Not-determined | Genome-fragment | NA    | 0 |
| S5_extracted_k141_22212   | 1161  | No | NA | 2  | 0 | Low-quality    | Genome-fragment | 5.39  | 0 |
| S11_extracted_k141_93425  | 3437  | No | NA | 0  | 2 | Not-determined | Genome-fragment | NA    | 0 |
| S5_vs_k141_99473[full]    | 1161  | No | NA | 0  | 0 | Low-quality    | Genome-fragment | 1.86  | 0 |
| S11_extracted_k141_47632  | 32534 | No | NA | 17 | 1 | Complete       | High-quality    | 100   | 0 |
| S11_extracted_k141_47634  | 1114  | No | NA | 0  | 0 | Not-determined | Genome-fragment | NA    | 0 |
| S5_vs_k141_196751[full]   | 1161  | No | NA | 0  | 0 | Low-quality    | Genome-fragment | 2.85  | 0 |
| S5_vs_k141_18210[full]    | 1161  | No | NA | 0  | 0 | Low-quality    | Genome-fragment | 2.93  | 0 |
| S11_extracted_k141_80     |       |    |    |    |   |                |                 |       |   |



|                           |       |     |    |   |   |                |                 |      |       |
|---------------------------|-------|-----|----|---|---|----------------|-----------------|------|-------|
| S13_extracted_7335        | 1162  | No  | NA | 1 | 0 | Low-quality    | Genome-fragment | 0.73 | 0     |
| S11_extracted_k141_47793  | 1019  | No  | NA | 2 | 0 | Not-determined | Genome-fragment | NA   | 0     |
| S14_extracted_k141_95700  | 1162  | No  | NA | 0 | 0 | Low-quality    | Genome-fragment | 0.31 | 0     |
| S14_extracted_k141_65315  | 1162  | No  | NA | 0 | 0 | Low-quality    | Genome-fragment | 1.19 | 0     |
| S14_vs_k141_47975  H2gene | 1162  | No  | NA | 1 | 0 | Low-quality    | Genome-fragment | 2.66 | 0     |
| S11_extracted_k141_1941   | 1054  | No  | NA | 0 | 1 | Not-determined | Genome-fragment | NA   | 0     |
| S3_extracted_k141_83847   | 1162  | No  | NA | 1 | 0 | Low-quality    | Genome-fragment | 0.8  | 0     |
| S3_vs_k141_56186  H2gene  | 1162  | No  | NA | 1 | 0 | Low-quality    | Genome-fragment | 2.26 | 0     |
| S11_extracted_k141_67213  | 1319  | No  | NA | 0 | 0 | Not-determined | Genome-fragment | NA   | 0     |
| S11_extracted_k141_93644  | 1002  | No  | NA | 0 | 1 | Not-determined | Genome-fragment | NA   | 0     |
| S11_extracted_k141_41654  | 1076  | No  | NA | 0 | 1 | Not-determined | Genome-fragment | NA   | 0     |
| S5_extracted_k141_124961  | 1162  | No  | NA | 1 | 0 | Low-quality    | Genome-fragment | 1.32 | 0     |
| S5_vs_k141_5582  H2gene   | 1162  | No  | NA | 1 | 0 | Low-quality    | Genome-fragment | 0.96 | 0     |
| S7_vs_92253  full         | 1162  | No  | NA | 0 | 1 | Low-quality    | Genome-fragment | 2.31 | 0     |
| S11_extracted_k141_93708  | 4288  | No  | NA | 0 | 1 | Not-determined | Genome-fragment | NA   | 0     |
| S11_extracted_k141_5286   | 1295  | No  | NA | 1 | 0 | Low-quality    | Genome-fragment | NA   | 0     |
| S11_extracted_k141_15442  | 4063  | No  | NA | 0 | 2 | Not-determined | Genome-fragment | NA   | 0     |
| S7_vs_132828  full        | 1162  | No  | NA | 0 | 0 | Low-quality    | Genome-fragment | 1.66 | 0     |
| S16_vs_162622  full       | 1162  | No  | NA | 1 | 0 | Low-quality    | Genome-fragment | 2.8  | 0     |
| S11_extracted_k141_22355  | 1246  | No  | NA | 0 | 1 | Not-determined | Genome-fragment | NA   | 0     |
| S11_extracted_k141_74598  | 1052  | No  | NA | 0 | 1 | Not-determined | Genome-fragment | NA   | 0     |
| S10_extracted_S1977       | 1162  | No  | NA | 0 | 1 | Low-quality    | Genome-fragment | 0.7  | 0     |
| S10_vs_69703  full        | 1162  | No  | NA | 0 | 0 | Low-quality    | Genome-fragment | 1.88 | 0     |
| S11_extracted_k141_2982   | 1984  | No  | NA | 0 | 1 | Not-determined | Genome-fragment | NA   | 0     |
| S11_extracted_k141_60896  | 9398  | No  | NA | 0 | 1 | Not-determined | Genome-fragment | NA   | 0     |
| S10_vs_57753  H2gene      | 1162  | No  | NA | 2 | 0 | Low-quality    | Genome-fragment | 2.79 | 0     |
| S11_extracted_k141_80743  | 1557  | No  | NA | 0 | 1 | Not-determined | Genome-fragment | NA   | 0     |
| S15_vs_77043  H2gene      | 1162  | No  | NA | 1 | 0 | Low-quality    | Genome-fragment | 3.28 | 0     |
| S8_vs_k141_192440  H2gene | 1162  | No  | NA | 0 | 0 | Low-quality    | Genome-fragment | NA   | 0     |
| S11_extracted_k141_39502  | 1163  | No  | NA | 0 | 0 | Low-quality    | Genome-fragment | 2.95 | 0     |
| S11_extracted_k141_34754  | 1022  | No  | NA | 0 | 0 | Not-determined | Genome-fragment | NA   | 0     |
| S11_extracted_k141_67326  | 1565  | No  | NA | 0 | 1 | Not-determined | Genome-fragment | NA   | 0     |
| S11_extracted_k141_74663  | 2597  | No  | NA | 0 | 1 | Not-determined | Genome-fragment | NA   | 0     |
| S11_extracted_k141_939    | 1163  | No  | NA | 1 | 0 | Low-quality    | Genome-fragment | 1.8  | 0     |
| S1_vs_k141_67516  full    | 1163  | No  | NA | 0 | 0 | Low-quality    | Genome-fragment | 2.17 | 0     |
| S11_extracted_k141_60883  | 4343  | No  | NA | 0 | 0 | Not-determined | Genome-fragment | NA   | 0     |
| S11_extracted_k141_9391   | 3538  | No  | NA | 0 | 0 | Not-determined | Genome-fragment | NA   | 0     |
| S1_vs_k141_34420  full    | 1163  | Yes | NA | 1 | 1 | Low-quality    | Genome-fragment | 0.97 | 45.06 |
| S3_extracted_k141_119931  | 1163  | No  | NA | 0 | 0 | Low-quality    | Genome-fragment | 3.84 | 0     |
| S11_extracted_k141_28570  | 1451  | No  | NA | 0 | 2 | Not-determined | Genome-fragment | NA   | 0     |
| S11_extracted_k141_54768  | 1688  | No  | NA | 0 | 2 | Not-determined | Genome-fragment | NA   | 0     |
| S11_extracted_k141_34771  | 1050  | No  | NA | 0 | 1 | Not-determined | Genome-fragment | NA   | 0     |
| S11_extracted_k141_48017  | 1441  | No  | NA | 0 | 2 | Not-determined | Genome-fragment | NA   | 0     |
| S11_extracted_k141_34783  | 3491  | No  | NA | 0 | 2 | Not-determined | Genome-fragment | NA   | 0     |
| S3_extracted_k141_37377   | 1163  | No  | NA | 1 | 0 | Low-quality    | Genome-fragment | 1.7  | 0     |
| S3_vs_k141_63294  full    | 1163  | No  | NA | 0 | 0 | Low-quality    | Genome-fragment | 2.76 | 0     |
| S3_vs_k141_45418  full    | 1163  | No  | NA | 0 | 0 | Low-quality    | Genome-fragment | 3.16 | 0     |
| S7_extracted_129296       | 1163  | No  | NA | 0 | 0 | Low-quality    | Genome-fragment | 2.03 | 0     |
| S16_extracted_64690       | 1163  | No  | NA | 1 | 1 | Low-quality    | Genome-fragment | 1.15 | 0     |
| S11_extracted_k141_28645  | 11934 | No  | NA | 0 | 1 | Complete       | High-quality    | 100  | 0     |
| S11_extracted_k141_61113  | 3404  | No  | NA | 0 | 0 | Not-determined | Genome-fragment | NA   | 0     |
| S11_extracted_k141_67606  | 1577  | No  | NA | 0 | 0 | Not-determined | Genome-fragment | NA   | 0     |
| S16_extracted_142390      | 1163  | No  | NA | 0 | 0 | Low-quality    | Genome-fragment | 2.74 | 0     |
| S11_extracted_k141_3165   | 1201  | No  | NA | 0 | 0 | Not-determined | Genome-fragment | NA   | 0     |
| S10_extracted_102502      | 1463  | No  | NA | 0 | 0 | Low-quality    | Genome-fragment | 0.89 | 0     |
| S11_extracted_k141_15628  | 1024  | No  | NA | 0 | 0 | Not-determined | Genome-fragment | NA   | 0     |
| S11_extracted_k141_22620  | 1484  | No  | NA | 0 | 0 | Not-determined | Genome-fragment | NA   | 0     |
| S11_extracted_k141_61121  | 1115  | No  | NA | 0 | 0 | Not-determined | Genome-fragment | NA   | 0     |
| S11_extracted_k141_48078  | 2214  | No  | NA | 0 | 2 | Not-determined | Genome-fragment | NA   | 0     |
| S10_vs_52934  H2gene      | 1163  | No  | NA | 1 | 0 | Low-quality    | Genome-fragment | 2.85 | 0     |
| S11_extracted_k141_41885  | 1144  | No  | NA | 0 | 0 | Not-determined | Genome-fragment | NA   | 0     |
| S11_extracted_k141_126218 | 1250  | No  | NA | 0 | 1 | Not-determined | Genome-fragment | NA   | 0     |
| S11_extracted_k141_100498 | 1293  | No  | NA | 0 | 1 | Not-determined | Genome-fragment | NA   | 0     |
| S8_vs_k141_166516  full   | 1163  | No  | NA | 0 | 0 | Low-quality    | Genome-fragment | 1.41 | 0     |
| S11_extracted_k141_3502   | 1063  | No  | NA | 1 | 1 | Not-determined | Genome-fragment | NA   | 0     |
| S17_vs_k141_76264  full   | 1164  | No  | NA | 0 | 1 | Low-quality    | Genome-fragment | 0.72 | 0     |
| S11_extracted_k141_61175  | 1159  | No  | NA | 0 | 1 | Not-determined | Genome-fragment | NA   | 0     |
| S11_vs_k141_7825  full    | 1164  | No  | NA | 2 | 0 | Low-quality    | Genome-fragment | 2.87 | 0     |
| S11_extracted_k141_38701  | 4213  | No  | NA | 0 | 0 | Not-determined | Genome-fragment | NA   | 0     |
| S11_extracted_k141_61176  | 3129  | No  | NA | 0 | 0 | Not-determined | Genome-fragment | NA   | 0     |
| S11_vs_k141_70856  full   | 1164  | No  | NA | 0 | 0 | Low-quality    | Genome-fragment | 2.12 | 0     |
| S11_extracted_k141_100558 | 3356  | No  | NA | 0 | 1 | Not-determined | Genome-fragment | NA   | 0     |
| S11_extracted_k141_9540   | 3839  | No  | NA | 0 | 4 | Not-determined | Genome-fragment | NA   | 0     |
| S14_extracted_k141_89493  | 1164  | No  | NA | 2 | 0 | Low-quality    | Genome-fragment | 3.79 | 0     |
| S11_extracted_k141_11935  | 1217  | No  | NA | 0 | 1 | Not-determined | Genome-fragment | NA   | 0     |
| S14_vs_k141_44322  full   | 1164  | No  | NA | 1 | 0 | Low-quality    | Genome-fragment | 1.29 | 0     |
| S11_extracted_k141_74806  | 5375  | No  | NA | 0 | 2 | Not-determined | Genome-fragment | NA   | 0     |
| S5_vs_k141_62654  full    | 1164  | No  | NA | 1 | 0 | Low-quality    | Genome-fragment | 2.61 | 0     |
| S11_extracted_k141_34849  | 1220  | No  | NA | 0 | 0 | Not-determined | Genome-fragment | NA   | 0     |
| S7_vs_76151  full         | 1164  | No  | NA | 1 | 0 | Low-quality    | Genome-fragment | 3.76 | 0     |
| S11_extracted_k141_6139   | 1164  | No  | NA | 0 | 1 | Low-quality    | Genome-fragment | 3.72 | 0     |
| S11_extracted_k141_6106   | 1188  | No  | NA | 0 | 2 | Not-determined | Genome-fragment | NA   | 0     |
| S11_extracted_k141_22740  | 5571  | No  | NA | 0 | 3 | Not-determined | Genome-fragment | NA   | 0     |
| S11_extracted_k141_67616  | 1163  | No  | NA | 0 | 0 | Not-determined | Genome-fragment | NA   | 0     |
| S6_vs_k141_18342  full    | 1164  | No  | NA | 0 | 0 | Low-quality    | Genome-fragment | 1.72 | 0     |
| S6_vs_k141_21455  full    | 1164  | No  | NA | 1 | 0 | Low-quality    | Genome-fragment | 2.62 | 0     |
| S11_extracted_k141_35028  | 3567  | No  | NA | 0 | 2 | Not-determined | Genome-fragment | NA   | 0     |
| S11_extracted_k141_80303  | 1165  | No  | NA | 2 | 0 | Low-quality    | Genome-fragment | 0.88 | 0     |
| S11_extracted_k141_54162  | 1066  | No  | NA | 0 | 0 | Not-determined | Genome-fragment | NA   | 0     |
| S11_extracted_k141_60868  | 1165  | No  | NA | 1 | 0 | Low-quality    | Genome-fragment | 2.88 | 0     |
| S11_extracted_k141_28444  | 1832  | No  | NA | 0 | 2 | Not-determined | Genome-fragment | NA   | 0     |
| S11_vs_k141_67640  H2gene | 1165  | No  | NA | 0 | 0 | Low-quality    | Genome-fragment | 2.86 | 0     |
| S11_extracted_k141_48199  | 6111  | No  | NA | 0 | 0 | Not-determined | Genome-fragment | NA   | 0     |
| S14_vs_k141_26906  full   | 1165  | Yes | NA | 1 | 1 | Low-quality    | Genome-fragment | 0.44 | 37.85 |
| S11_extracted_k141_76038  | 1033  | No  | NA | 0 | 0 | Not-determined | Genome-fragment | NA   | 0     |
| S11_extracted_k141_35140  | 2562  | No  | NA | 0 | 1 | Not-determined | Genome-fragment | NA   | 0     |
| S11_extracted_k141_64061  | 1165  | No  | NA | 0 | 0 | Low-quality    | Genome-fragment | 2.61 | 0     |
| S1_vs_k141_38478  full    | 1117  | No  | NA | 0 | 0 | Not-determined | Genome-fragment | NA   | 0     |
| S3_extracted_k141_24682   | 1165  | No  | NA | 0 | 0 | Low-quality    | Genome-fragment | 4.24 | 0     |
| S11_extracted_k141_42165  | 1165  | No  | NA | 0 | 0 | Low-quality    | Genome-fragment | 4.04 | 0     |
| S11_extracted_k141_42165  | 1488  | No  | NA | 0 | 3 | Not-determined | Genome-fragment | NA   | 0     |
| S11_extracted_k141_24957  | 1020  | No  | NA | 0 | 0 | Not-determined | Genome-fragment | NA   | 0     |
| S11_extracted_k141_3379   | 3481  | No  | NA | 0 | 0 | Not-determined | Genome-fragment | NA   | 0     |
| S11_extracted_k141_94319  | 1407  | No  | NA | 0 | 2 | Not-determined | Genome-fragment | NA   | 0     |
| S5_extracted_k141_17309   | 1165  | No  | NA | 0 | 0 | Low-quality    | Genome-fragment | 2.57 | 0     |
| S11_extracted_k141_100864 | 1045  | No  | NA | 0 | 1 | Not-determined | Genome-fragment | NA   | 0     |
| S11_extracted_k141_48327  | 1068  | No  | NA | 0 | 0 | Not-determined | Genome-fragment | NA   | 0     |
| S11_extracted_k141_6139   | 1981  | No  | NA | 0 | 0 | Not-determined | Genome-fragment | NA   | 0     |
| S11_extracted_k141_61405  | 1830  | No  | NA | 0 | 0 | Not-determined | Genome-fragment | NA   | 0     |
| S11_extracted_k141_94343  | 3252  | No  | NA | 0 | 0 | Not-determined | Genome-fragment | NA   | 0     |
| S11_extracted_k141_94351  | 1342  | No  | NA | 0 | 1 | Not-determined | Genome-fragment | NA   | 0     |
| S11_extracted_k141_48355  | 1798  | No  | NA | 0 | 0 | Not-determined | Genome-fragment | NA   | 0     |
| S11_extracted_k141_94357  | 2454  | No  | NA | 0 | 3 | Not-determined | Genome-fragment | NA   | 0     |
| S7_vs_12964  full         | 1165  | No  | NA | 1 | 0 | Low-quality    | Genome-fragment | 2.82 | 0     |
| S10_vs_116827  H2gene     | 1165  | No  | NA | 0 | 0 | Low-quality    | Genome-fragment | 2.43 | 0     |
| S11_extracted_k141_81190  | 1503  | No  | NA | 0 | 1 | Not-determined | Genome-fragment | NA   | 0     |
| S11_extracted_k141_61439  | 1179  | No  | NA | 0 | 2 | Not-determined | Genome-fragment | NA   | 0     |
| S15_extracted_34945       | 1165  | No  | NA | 0 | 1 | Low-quality    | Genome-fragment | 0.43 | 0     |
| S8_extracted_k141_102429  | 1165  | No  | NA | 0 | 0 | Low-quality    | Genome-fragment | 2.44 | 0     |
| S11_extracted_k141_3469   | 1088  | No  | NA | 0 | 0 | Not-determined | Genome-fragment | NA   | 0     |
| S11_extracted_k141_16311  | 1257  | No  | NA | 0 | 0 | Not-determined | Genome-fragment | NA   | 0     |
| S11_extracted_k141_67826  | 1456  | No  | NA | 0 | 0 | Not-determined | Genome-fragment | NA   | 0     |
| S11_extracted_k141_75172  | 3634  | No  | NA | 0 | 3 | Not-determined | Genome-fragment | NA   | 0     |
| S11_extracted_k141_82976  | 1325  | No  | NA | 0 | 3 | Not-determined | Genome-fragment | NA   | 0     |
| S11_extracted_k141_123257 | 1166  | No  | NA | 0 | 0 | Low-quality    | Genome-fragment | 2.77 | 0     |
| S13_extracted_124335      | 1166  | No  | NA | 0 | 1 | Low-quality    | Genome-fragment | 4.34 | 0     |
| S11_extracted_k141_87985  | 1080  | No  | NA | 0 | 0 | Not-determined | Genome-fragment | NA   | 0     |
| S11_extracted_k141_112229 | 3781  | No  | NA | 0 | 1 | Not-determined | Genome-fragment | NA   | 0     |
| S14_vs_k141_8785  full    | 1166  | No  | NA | 0 | 1 | Low-quality    | Genome-fragment | 0.52 | 0     |
| S5_vs_k141_140910  full   | 1166  | No  | NA | 1 | 0 | Low-quality    | Genome-fragment | 2.92 | 0     |
| S5_vs_k141_118882  full   | 1166  | No  | NA | 0 | 0 | Low-quality    | Genome-fragment | 2.28 | 0     |
| S11_extracted_k141_75208  | 1008  | No  | NA | 0 | 0 | Not-determined | Genome-fragment | NA   | 0     |
| S5_vs_k141_142700  full   | 1166  | No  | NA | 1 | 0 | Low-quality    | Genome-fragment | 2.69 | 0     |
| S11_extracted_k141_3531   | 1574  | No  | NA | 0 | 0 | Not-determined | Genome-fragment | NA   | 0     |
| S5_vs_k141_18210  H2gene  | 1166  | No  | NA | 0 | 0 | Low-quality    | Genome-fragment | 1.76 | 0     |
| S11_extracted_k141_75229  | 1263  | No  | NA | 0 | 1 | Not-determined | Genome-fragment | NA   | 0     |
| S11_extracted_k141_35418  | 1548  | No  | NA | 0 | 2 | Not-determined | Genome-fragment | NA   | 0     |
| S7_extracted_54967        | 1166  | No  | NA | 1 | 0 | Low-quality    | Genome-fragment | 2.46 | 0     |
| S11_extracted_k141_55302  | 5347  | No  | NA | 0 | 4 | Not-determined | Genome-fragment | NA   | 0     |
| S11_extracted_k141_55320  | 2533  | No  | NA | 0 | 0 | Not-determined | Genome-fragment | NA   | 0     |
| S7_vs_15522  full         | 1166  | No  | NA | 2 | 0 | Low-quality    | Genome-fragment | 2.31 | 0     |
| S11_extracted_k141_61544  | 1130  | No  | NA | 0 | 1 | Not-determined | Genome-fragment | NA   | 0     |
| S16_extracted_136147      | 1166  | No  | NA | 0 | 0 | Low-quality    | Genome-fragment | 2.65 | 0     |
| S16_vs_51033  full        | 1166  | No  | NA | 2 | 0 | Low-quality    | Genome-fragment | 2.5  | 0     |
| S11_extracted_k141_67898  | 1096  | No  | NA | 0 | 0 |                |                 |      |       |



|                           |       |     |    |     |   |                |                 |       |       |
|---------------------------|-------|-----|----|-----|---|----------------|-----------------|-------|-------|
| S10_vs_21459[full]        | 1167  | No  | NA | 1   | 0 | Low-quality    | Genome-fragment | 3.15  | 0     |
| S11_extracted_k141_42598  | 1367  | No  | NA | 0   | 0 | Not-determined | Genome-fragment | NA    | 0     |
| S11_extracted_k141_75543  | 1372  | No  | NA | 0   | 0 | Not-determined | Genome-fragment | NA    | 0     |
| S11_extracted_k141_75547  | 1273  | No  | NA | 0   | 0 | Not-determined | Genome-fragment | NA    | 0     |
| S10_vs_75992[full]        | 1167  | No  | NA | 0   | 0 | Low-quality    | Genome-fragment | 2.75  | 0     |
| S12_extracted_k141_12308  | 1167  | No  | NA | 2   | 0 | Low-quality    | Genome-fragment | 2.49  | 0     |
| S11_extracted_k141_55601  | 1059  | No  | NA | 0   | 0 | Not-determined | Genome-fragment | NA    | 0     |
| S11_extracted_k141_13377  | 1182  | No  | NA | 0   | 0 | Not-determined | Genome-fragment | NA    | 0     |
| S11_extracted_k141_61748  | 3808  | No  | NA | 0   | 0 | Not-determined | Genome-fragment | NA    | 0     |
| S11_extracted_k141_61755  | 1036  | No  | NA | 0   | 1 | Not-determined | Genome-fragment | NA    | 0     |
| S11_extracted_k141_75559  | 1986  | No  | NA | 0   | 0 | Not-determined | Genome-fragment | NA    | 0     |
| S12_vs_k141_144705[full]  | 1167  | No  | NA | 0   | 0 | Low-quality    | Genome-fragment | 3.13  | 0     |
| S11_extracted_k141_75583  | 1013  | No  | NA | 0   | 1 | Not-determined | Genome-fragment | NA    | 0     |
| S11_extracted_k141_88266  | 1416  | No  | NA | 0   | 0 | Not-determined | Genome-fragment | NA    | 0     |
| S11_extracted_k141_12415  | 1069  | No  | NA | 0   | 1 | Not-determined | Genome-fragment | NA    | 0     |
| S8_vs_k141_07892[full]    | 1167  | No  | NA | 0   | 0 | Low-quality    | Genome-fragment | 1.58  | 0     |
| S11_extracted_k141_88299  | 3732  | No  | NA | 0   | 1 | Not-determined | Genome-fragment | NA    | 0     |
| S11_extracted_k141_81557  | 1042  | No  | NA | 0   | 0 | Not-determined | Genome-fragment | NA    | 0     |
| S11_extracted_k141_101216 | 1061  | No  | NA | 0   | 1 | Not-determined | Genome-fragment | NA    | 0     |
| S11_extracted_k141_88349  | 1326  | No  | NA | 0   | 0 | Not-determined | Genome-fragment | NA    | 0     |
| S17_vs_k141_3810[full]    | 1168  | No  | NA | 0   | 0 | Low-quality    | Genome-fragment | 2.8   | 0     |
| S11_extracted_k141_55736  | 1087  | No  | NA | 0   | 1 | Not-determined | Genome-fragment | NA    | 0     |
| S11_extracted_k141_94853  | 1213  | No  | NA | 0   | 0 | Not-determined | Genome-fragment | NA    | 0     |
| S17_vs_k141_94801[full]   | 1168  | No  | NA | 1   | 0 | Low-quality    | Genome-fragment | 0.82  | 0     |
| S11_extracted_k141_55780  | 3055  | No  | NA | 0   | 2 | Not-determined | Genome-fragment | NA    | 0     |
| S11_extracted_k141_61820  | 1007  | No  | NA | 0   | 1 | Not-determined | Genome-fragment | NA    | 0     |
| S11_extracted_k141_55786  | 1106  | No  | NA | 0   | 1 | Not-determined | Genome-fragment | NA    | 0     |
| S11_extracted_k141_101360 | 1032  | No  | NA | 0   | 0 | Not-determined | Genome-fragment | NA    | 0     |
| S11_extracted_k141_12503  | 2158  | No  | NA | 0   | 0 | Not-determined | Genome-fragment | NA    | 0     |
| S11_extracted_k141_61974  | 3132  | No  | NA | 0   | 2 | Not-determined | Genome-fragment | NA    | 0     |
| S11_extracted_k141_55840  | 1022  | No  | NA | 0   | 1 | Not-determined | Genome-fragment | NA    | 0     |
| S11_extracted_k141_91862  | 1168  | No  | NA | 0   | 0 | Low-quality    | Genome-fragment | 2.98  | 0     |
| S11_extracted_k141_94948  | 1174  | No  | NA | 0   | 2 | Not-determined | Genome-fragment | NA    | 0     |
| S1_vs_k141_154695[full]   | 1168  | No  | NA | 0   | 0 | Low-quality    | Genome-fragment | 5.96  | 0     |
| S8_extracted_k141_71521   | 1168  | No  | NA | 0   | 0 | Low-quality    | Genome-fragment | 2.22  | 0     |
| S11_extracted_k141_61653  | 1419  | No  | NA | 0   | 0 | Not-determined | Genome-fragment | NA    | 0     |
| S11_extracted_k141_42847  | 1025  | No  | NA | 0   | 0 | Not-determined | Genome-fragment | NA    | 0     |
| S8_vs_k141_13511[full]    | 1168  | No  | NA | 0   | 0 | Low-quality    | Genome-fragment | 2.57  | 0     |
| S3_vs_k141_17945[full]    | 1168  | No  | NA | 0   | 0 | Low-quality    | Genome-fragment | 2.32  | 0     |
| S11_extracted_k141_36030  | 1387  | No  | NA | 0   | 1 | Not-determined | Genome-fragment | NA    | 0     |
| S11_extracted_k141_29549  | 3102  | No  | NA | 0   | 2 | Not-determined | Genome-fragment | NA    | 0     |
| S11_extracted_k141_8170   | 1004  | No  | NA | 0   | 0 | Not-determined | Genome-fragment | NA    | 0     |
| S11_extracted_k141_88513  | 2190  | No  | NA | 0   | 1 | Not-determined | Genome-fragment | NA    | 0     |
| S11_extracted_k141_3790   | 6585  | No  | NA | 16  | 2 | Medium-quality | Genome-fragment | 69.9  | 0     |
| S16_vs_7899[full]         | 1168  | No  | NA | 0   | 0 | Low-quality    | Genome-fragment | 2.59  | 0     |
| S16_vs_168854[full]       | 1168  | No  | NA | 0   | 1 | Low-quality    | Genome-fragment | 0.97  | 0     |
| S16_vs_31322[full]        | 1168  | No  | NA | 1   | 0 | Low-quality    | Genome-fragment | 3.46  | 0     |
| S11_extracted_k141_3822   | 1462  | No  | NA | 0   | 0 | Not-determined | Genome-fragment | NA    | 0     |
| S10_extracted_53462       | 1168  | No  | NA | 0   | 0 | Low-quality    | Genome-fragment | 2.07  | 0     |
| S10_vs_76289[full]        | 1168  | No  | NA | 0   | 0 | Low-quality    | Genome-fragment | 1.47  | 0     |
| S11_extracted_k141_88588  | 1155  | No  | NA | 0   | 1 | Not-determined | Genome-fragment | NA    | 0     |
| S11_extracted_k141_62123  | 1472  | No  | NA | 0   | 0 | Not-determined | Genome-fragment | NA    | 0     |
| S17_vs_k141_88760[full]   | 1169  | No  | NA | 0   | 0 | Low-quality    | Genome-fragment | 4.11  | 0     |
| S17_vs_k141_172921[full]  | 1169  | No  | NA | 0   | 0 | Low-quality    | Genome-fragment | 2.66  | 0     |
| S11_extracted_k141_16657  | 3440  | No  | NA | 0   | 1 | Not-determined | Genome-fragment | NA    | 0     |
| S11_extracted_k141_88618  | 1336  | No  | NA | 0   | 0 | Not-determined | Genome-fragment | NA    | 0     |
| S9_extracted_k141_44920   | 1169  | No  | NA | 0   | 0 | Low-quality    | Genome-fragment | 1.95  | 0     |
| S11_extracted_k141_103070 | 1169  | No  | NA | 4   | 0 | Low-quality    | Genome-fragment | 3.86  | 0     |
| S11_extracted_k141_56049  | 1070  | No  | NA | 0   | 0 | Not-determined | Genome-fragment | NA    | 0     |
| S11_extracted_k141_36148  | 5666  | No  | NA | 0   | 1 | Not-determined | Genome-fragment | NA    | 0     |
| S11_extracted_k141_29631  | 3215  | No  | NA | 0   | 3 | Not-determined | Genome-fragment | NA    | 0     |
| S11_extracted_k141_29642  | 1685  | No  | NA | 0   | 1 | Not-determined | Genome-fragment | NA    | 0     |
| S11_extracted_k141_62195  | 1016  | No  | NA | 0   | 1 | Not-determined | Genome-fragment | NA    | 0     |
| S11_extracted_k141_36182  | 1189  | No  | NA | 0   | 1 | Not-determined | Genome-fragment | NA    | 0     |
| S11_extracted_k141_42929  | 1221  | No  | NA | 0   | 0 | Not-determined | Genome-fragment | NA    | 0     |
| S11_extracted_k141_23731  | 1095  | No  | NA | 0   | 1 | Not-determined | Genome-fragment | NA    | 0     |
| S11_vs_k141_100876[full]  | 1169  | No  | NA | 1   | 0 | Low-quality    | Genome-fragment | 3.07  | 0     |
| S11_extracted_k141_36218  | 3777  | No  | NA | 0   | 2 | Not-determined | Genome-fragment | NA    | 0     |
| S11_extracted_k141_36240  | 1244  | No  | NA | 0   | 0 | Not-determined | Genome-fragment | NA    | 0     |
| S11_extracted_k141_75911  | 3629  | No  | NA | 0   | 4 | Not-determined | Genome-fragment | NA    | 0     |
| S11_extracted_k141_95067  | 46485 | No  | NA | 12  | 0 | Complete       | High-quality    | 100   | 0     |
| S13_vs_115096[full]       | 1169  | No  | NA | 0   | 0 | Low-quality    | Genome-fragment | 2.59  | 0     |
| S11_extracted_k141_23838  | 1474  | No  | NA | 0   | 1 | Not-determined | Genome-fragment | NA    | 0     |
| S14_vs_k141_55512[full]   | 1169  | No  | NA | 0   | 0 | Low-quality    | Genome-fragment | 2.2   | 0     |
| S14_vs_k141_72419[full]   | 1169  | No  | NA | 0   | 0 | Low-quality    | Genome-fragment | 0.93  | 43.8  |
| S11_extracted_k141_43097  | 1746  | No  | NA | 0   | 2 | Not-determined | Genome-fragment | NA    | 0     |
| S3_extracted_k141_121262  | 1169  | No  | NA | 0   | 1 | Low-quality    | Genome-fragment | 1.17  | 0     |
| S11_extracted_k141_36262  | 3992  | No  | NA | 0   | 2 | Not-determined | Genome-fragment | NA    | 0     |
| S11_extracted_k141_36352  | 1573  | No  | NA | 0   | 0 | Not-determined | Genome-fragment | NA    | 0     |
| S3_extracted_k141_62064   | 1169  | No  | NA | 2   | 0 | Low-quality    | Genome-fragment | 0.69  | 0     |
| S11_extracted_k141_61971  | 1261  | No  | NA | 0   | 2 | Not-determined | Genome-fragment | NA    | 0     |
| S11_extracted_k141_75936  | 1458  | No  | NA | 0   | 0 | Not-determined | Genome-fragment | NA    | 0     |
| S11_extracted_k141_4121   | 1171  | No  | NA | 0   | 1 | Not-determined | Genome-fragment | NA    | 0     |
| S5_vs_k141_22647[full]    | 1169  | No  | NA | 0   | 0 | Low-quality    | Genome-fragment | 0.5   | 0     |
| S11_extracted_k141_29745  | 1380  | No  | NA | 0   | 0 | Not-determined | Genome-fragment | NA    | 0     |
| S11_extracted_k141_43191  | 1206  | No  | NA | 0   | 1 | Not-determined | Genome-fragment | NA    | 0     |
| S11_extracted_k141_49085  | 3490  | No  | NA | 0   | 4 | Not-determined | Genome-fragment | NA    | 0     |
| S11_extracted_k141_36434  | 1514  | No  | NA | 0   | 1 | Not-determined | Genome-fragment | NA    | 0     |
| S11_extracted_k141_24027  | 1184  | No  | NA | 0   | 1 | Not-determined | Genome-fragment | NA    | 0     |
| S11_extracted_k141_29763  | 3116  | No  | NA | 0   | 3 | Not-determined | Genome-fragment | NA    | 0     |
| S7_vs_87331[full]         | 1169  | No  | NA | 1   | 0 | Low-quality    | Genome-fragment | 2.16  | 0     |
| S7_vs_71643[full]         | 1169  | No  | NA | 0   | 0 | Low-quality    | Genome-fragment | 1.31  | 0     |
| S11_extracted_k141_36446  | 2100  | No  | NA | 0   | 0 | Not-determined | Genome-fragment | NA    | 0     |
| S16_extracted_41996       | 1169  | No  | NA | 0   | 1 | Low-quality    | Genome-fragment | 0.77  | 0     |
| S11_extracted_k141_56401  | 1831  | No  | NA | 0   | 2 | Not-determined | Genome-fragment | NA    | 0     |
| S11_extracted_k141_49107  | 3077  | No  | NA | 0   | 0 | Not-determined | Genome-fragment | NA    | 0     |
| S11_extracted_k141_62498  | 1860  | No  | NA | 0   | 0 | Not-determined | Genome-fragment | NA    | 0     |
| S11_extracted_k141_36426  | 3100  | No  | NA | 0   | 3 | Not-determined | Genome-fragment | NA    | 0     |
| S11_extracted_k141_63219  | 1868  | No  | NA | 0   | 0 | Not-determined | Genome-fragment | NA    | 0     |
| S11_extracted_k141_95288  | 1414  | No  | NA | 0   | 2 | Not-determined | Genome-fragment | NA    | 0     |
| S16_vs_12821[full]        | 1169  | No  | NA | 0   | 1 | Low-quality    | Genome-fragment | 2.2   | 0     |
| S10_extracted_9431        | 1169  | No  | NA | 0   | 0 | Low-quality    | Genome-fragment | 3.35  | 0     |
| S11_extracted_k141_95313  | 1994  | No  | NA | 0   | 2 | Not-determined | Genome-fragment | NA    | 0     |
| S11_extracted_k141_101831 | 4961  | No  | NA | 0   | 0 | Not-determined | Genome-fragment | NA    | 0     |
| S10_vs_60213[full]        | 1169  | No  | NA | 0   | 0 | Low-quality    | Genome-fragment | 1.96  | 0     |
| S12_vs_k141_146033[full]  | 1169  | No  | NA | 0   | 0 | Low-quality    | Genome-fragment | 0.64  | 0     |
| S11_extracted_k141_76016  | 1151  | No  | NA | 0   | 0 | Not-determined | Genome-fragment | NA    | 0     |
| S15_vs_77512[full]        | 1169  | No  | NA | 0   | 0 | Low-quality    | Genome-fragment | 2.88  | 0     |
| S11_extracted_k141_88939  | 1720  | No  | NA | 0   | 1 | Not-determined | Genome-fragment | NA    | 0     |
| S11_extracted_k141_43300  | 1969  | No  | NA | 0   | 0 | Not-determined | Genome-fragment | NA    | 0     |
| S11_extracted_k141_17017  | 1452  | No  | NA | 0   | 1 | Not-determined | Genome-fragment | NA    | 0     |
| S11_extracted_k141_88980  | 2110  | No  | NA | 0   | 2 | Not-determined | Genome-fragment | NA    | 0     |
| S8_vs_k141_121670[full]   | 1169  | No  | NA | 0   | 0 | Low-quality    | Genome-fragment | 2.46  | 0     |
| S11_extracted_k141_36596  | 1172  | No  | NA | 0   | 0 | Not-determined | Genome-fragment | NA    | 0     |
| S8_vs_k141_167797[full]   | 1169  | No  | NA | 0   | 0 | Low-quality    | Genome-fragment | 1.92  | 0     |
| S11_extracted_k141_101916 | 3198  | No  | NA | 0   | 2 | Not-determined | Genome-fragment | NA    | 0     |
| S11_extracted_k141_68693  | 40422 | No  | NA | 10  | 0 | Medium-quality | Genome-fragment | 67.28 | 0     |
| S11_extracted_k141_68697  | 1391  | No  | NA | 0   | 1 | Not-determined | Genome-fragment | NA    | 0     |
| S11_extracted_k141_82163  | 4572  | No  | NA | 0   | 0 | Not-determined | Genome-fragment | NA    | 0     |
| S11_extracted_k141_101974 | 2218  | No  | NA | 0   | 0 | Not-determined | Genome-fragment | NA    | 0     |
| S11_extracted_k141_24295  | 3213  | No  | NA | 0   | 1 | Not-determined | Genome-fragment | NA    | 0     |
| S11_extracted_k141_17133  | 1044  | No  | NA | 0   | 0 | Not-determined | Genome-fragment | NA    | 0     |
| S11_extracted_k141_29970  | 2353  | No  | NA | 0   | 2 | Not-determined | Genome-fragment | NA    | 0     |
| S8_vs_k141_173292[full]   | 1169  | No  | NA | 3   | 0 | Low-quality    | Genome-fragment | 3.16  | 0     |
| S11_extracted_k141_62662  | 1065  | No  | NA | 0   | 1 | Not-determined | Genome-fragment | NA    | 0     |
| S11_extracted_k141_17162  | 1047  | No  | NA | 0   | 0 | Not-determined | Genome-fragment | NA    | 0     |
| S11_extracted_k141_36741  | 1117  | No  | NA | 0   | 1 | Not-determined | Genome-fragment | NA    | 0     |
| S11_extracted_k141_10907  | 37668 | No  | NA | 24  | 0 | Complete       | High-quality    | 100   | 0     |
| S17_vs_k141_160863[full]  | 1170  | No  | NA | 0   | 0 | Low-quality    | Genome-fragment | 2.04  | 0     |
| S9_extracted_k141_4929    | 1170  | No  | NA | 0   | 0 | Low-quality    | Genome-fragment | 2.37  | 0     |
| S11_extracted_k141_62703  | 1582  | No  | NA | 0   | 2 | Not-determined | Genome-fragment | NA    | 0     |
| S11_extracted_k141_62754  | 1378  | No  | NA | 0   | 1 | Not-determined | Genome-fragment | NA    | 0     |
| S11_vs_k141_9562[full]    | 1170  | Yes | NA | 276 | 1 | Low-quality    | Genome-fragment | 0.71  | 76.41 |
| S11_extracted_k141_24442  | 2377  | No  | NA | 0   | 0 | Not-determined | Genome-fragment | NA    | 0     |
| S11_extracted_k141_10977  | 1176  | No  | NA | 0   | 1 | Not-determined | Genome-fragment | NA    | 0     |
| S11_extracted_k141_82286  | 1747  | No  | NA | 0   | 0 | Not-determined | Genome-fragment | NA    | 0     |
| S13_vs_15444[full]        | 1170  | No  | NA | 0   | 0 | Low-quality    | Genome-fragment | 3.13  | 0     |
| S11_extracted_k141_24522  | 1004  | No  | NA | 0   | 0 | Not-determined | Genome-fragment | NA    | 0     |
| S11_extracted_k141_49370  | 1036  | No  | NA | 0   | 1 | Not-determined | Genome-fragment | NA    | 0     |
| S11_extracted_k141_95700  | 2538  | No  | NA | 0   | 2 | Not-determined | Genome-fragment | NA    | 0     |
| S11_extracted_k141_82301  | 3138  | No  | NA | 0   | 0 | Not-determined | Genome-fragment | NA    | 0     |
| S11_extracted_k141_24568  | 1024  | No  | NA | 0   | 0 | Not-determined | Genome-fragment | NA    | 0     |
| S13_vs_105436[full]       | 1170  | No  | NA | 0   | 0 | Low-quality    | Genome-fragment | 1.32  | 0     |
| S11_extracted_k141_95795  | 1759  | No  | NA | 0   | 0 | Not-determined | Genome-fragment | NA    | 0     |
| S11_extracted_k141_24655  | 1017  | No  | NA | 0   | 1 |                |                 |       |       |



|                            |       |     |    |     |   |                |                 |    |       |       |
|----------------------------|-------|-----|----|-----|---|----------------|-----------------|----|-------|-------|
| S11_extracted_k141_82422   | 1239  | No  | NA | 0   | 0 | Not-determined | Genome-fragment | NA | 0     | 0     |
| S1_vo_k141_09091   H2gene  | 1171  | No  | NA | 1   | 0 | Low-quality    | Genome-fragment | NA | 0.89  | 0     |
| S3_extracted_k141_111730   | 1171  | No  | NA | 0   | 0 | Low-quality    | Genome-fragment | NA | 0.72  | 0     |
| S11_extracted_k141_102467  | 1369  | No  | NA | 0   | 2 | Not-determined | Genome-fragment | NA | 0     | 0     |
| S11_extracted_k141_36972   | 3541  | No  | NA | 0   | 2 | Not-determined | Genome-fragment | NA | 0     | 0     |
| S11_extracted_k141_63109   | 2306  | No  | NA | 0   | 0 | Not-determined | Genome-fragment | NA | 0     | 0     |
| S3_extracted_k141_10428    | 1171  | No  | NA | 1   | 0 | Low-quality    | Genome-fragment | NA | 2.85  | 0     |
| S11_extracted_k141_63112   | 3493  | No  | NA | 0   | 1 | Not-determined | Genome-fragment | NA | 0     | 0     |
| S11_extracted_k141_1024894 | 1035  | No  | NA | 0   | 1 | Not-determined | Genome-fragment | NA | 0     | 0     |
| S3_vo_k141_40935   H2gene  | 1171  | No  | NA | 0   | 0 | Low-quality    | Genome-fragment | NA | 3.06  | 0     |
| S11_extracted_k141_43784   | 1566  | No  | NA | 0   | 1 | Not-determined | Genome-fragment | NA | 0     | 0     |
| S11_extracted_k141_30406   | 1054  | No  | NA | 0   | 1 | Not-determined | Genome-fragment | NA | 0     | 0     |
| S11_extracted_k141_43815   | 3915  | No  | NA | 0   | 0 | Not-determined | Genome-fragment | NA | 0     | 0     |
| S16_vo_28247   full        | 1171  | No  | NA | 0   | 0 | Low-quality    | Genome-fragment | NA | 3.27  | 0     |
| S11_extracted_k141_4900    | 1353  | No  | NA | 0   | 0 | Not-determined | Genome-fragment | NA | 0     | 0     |
| S11_extracted_k141_57079   | 1161  | No  | NA | 0   | 1 | Not-determined | Genome-fragment | NA | 0     | 0     |
| S11_extracted_k141_30434   | 1064  | No  | NA | 0   | 1 | Not-determined | Genome-fragment | NA | 0     | 0     |
| S11_extracted_k141_17679   | 2114  | No  | NA | 0   | 1 | Not-determined | Genome-fragment | NA | 0     | 0     |
| S12_extracted_k141_126875  | 1171  | No  | NA | 0   | 1 | Low-quality    | Genome-fragment | NA | 0.33  | 0     |
| S11_extracted_k141_4957    | 3205  | No  | NA | 0   | 2 | Not-determined | Genome-fragment | NA | 0     | 0     |
| S12_vo_k141_94302   full   | 1171  | Yes | NA | 442 | 1 | Low-quality    | Genome-fragment | NA | 0.69  | 62.25 |
| S11_extracted_k141_25034   | 1024  | No  | NA | 0   | 1 | Not-determined | Genome-fragment | NA | 0     | 0     |
| S12_vo_k141_14935   full   | 1171  | No  | NA | 0   | 0 | Low-quality    | Genome-fragment | NA | 1.86  | 0     |
| S11_extracted_k141_37313   | 2299  | No  | NA | 0   | 3 | Not-determined | Genome-fragment | NA | 0     | 0     |
| S3_extracted_k141_34998    | 1172  | No  | NA | 0   | 0 | Low-quality    | Genome-fragment | NA | 2.46  | 0     |
| S5_vo_k141_140154   full   | 1172  | No  | NA | 0   | 0 | Low-quality    | Genome-fragment | NA | 2.7   | 0     |
| S5_vo_k141_137565   full   | 1172  | No  | NA | 1   | 0 | Low-quality    | Genome-fragment | NA | 2.05  | 0     |
| S11_extracted_k141_37339   | 1991  | No  | NA | 0   | 0 | Not-determined | Genome-fragment | NA | 0     | 0     |
| S5_vo_k141_110443   H2gene | 1172  | No  | NA | 0   | 0 | Low-quality    | Genome-fragment | NA | 1.33  | 0     |
| S11_extracted_k141_49943   | 1035  | No  | NA | 0   | 0 | Not-determined | Genome-fragment | NA | 0     | 0     |
| S11_extracted_k141_82626   | 1398  | No  | NA | 0   | 2 | Not-determined | Genome-fragment | NA | 0     | 0     |
| S16_vo_163537   full       | 1172  | No  | NA | 0   | 0 | Low-quality    | Genome-fragment | NA | 2.91  | 0     |
| S11_extracted_k141_11431   | 1696  | No  | NA | 0   | 1 | Not-determined | Genome-fragment | NA | 0     | 0     |
| S11_extracted_k141_57263   | 2874  | No  | NA | 0   | 0 | Not-determined | Genome-fragment | NA | 0     | 0     |
| S10_vo_80342   full        | 1172  | No  | NA | 1   | 0 | Low-quality    | Genome-fragment | NA | 0.88  | 0     |
| S11_extracted_k141_49977   | 5269  | No  | NA | 0   | 1 | Not-determined | Genome-fragment | NA | 0     | 0     |
| S15_vo_24092   full        | 1172  | No  | NA | 2   | 0 | Low-quality    | Genome-fragment | NA | 3.44  | 0     |
| S8_extracted_k141_17813    | 1868  | No  | NA | 0   | 1 | Not-determined | Genome-fragment | NA | 0     | 0     |
| S8_extracted_k141_45495    | 1172  | No  | NA | 0   | 0 | Low-quality    | Genome-fragment | NA | 0.74  | 0     |
| S11_extracted_k141_69409   | 1381  | No  | NA | 0   | 0 | Not-determined | Genome-fragment | NA | 0     | 0     |
| S8_extracted_k141_199134   | 1172  | No  | NA | 1   | 0 | Low-quality    | Genome-fragment | NA | 2.61  | 0     |
| S8_vo_k141_36357   full    | 1172  | No  | NA | 0   | 1 | Low-quality    | Genome-fragment | NA | 0.47  | 0     |
| S8_vo_k141_75737   full    | 1172  | No  | NA | 0   | 0 | Low-quality    | Genome-fragment | NA | 0.74  | 0     |
| S17_extracted_k141_69656   | 1173  | No  | NA | 0   | 0 | Low-quality    | Genome-fragment | NA | 2.71  | 0     |
| S11_extracted_k141_11503   | 4617  | No  | NA | 0   | 4 | Not-determined | Genome-fragment | NA | 0     | 0     |
| S17_extracted_k141_55024   | 1173  | No  | NA | 0   | 1 | Low-quality    | Genome-fragment | NA | 0.24  | 0     |
| S11_extracted_k141_43997   | 59939 | No  | NA | 5   | 0 | Medium-quality | Genome-fragment | NA | 65.91 | 0     |
| S11_extracted_k141_44020   | 1095  | No  | NA | 0   | 0 | Not-determined | Genome-fragment | NA | 1.95  | 0     |
| S17_vo_k141_141043   full  | 1173  | No  | NA | 0   | 0 | Low-quality    | Genome-fragment | NA | 1.95  | 0     |
| S17_vo_k141_71525   H2gene | 1173  | No  | NA | 2   | 0 | Low-quality    | Genome-fragment | NA | 2.99  | 0     |
| S9_vo_k141_63331   full    | 1173  | No  | NA | 0   | 3 | Low-quality    | Genome-fragment | NA | 0.34  | 0     |
| S11_extracted_k141_89587   | 1438  | No  | NA | 0   | 3 | Not-determined | Genome-fragment | NA | 0     | 0     |
| S1_vo_k141_149876   full   | 1173  | No  | NA | 1   | 0 | Low-quality    | Genome-fragment | NA | 3     | 0     |
| S11_extracted_k141_11565   | 1354  | No  | NA | 0   | 1 | Not-determined | Genome-fragment | NA | 0     | 0     |
| S3_extracted_k141_115045   | 1173  | No  | NA | 0   | 0 | Low-quality    | Genome-fragment | NA | 2.42  | 0     |
| S5_extracted_k141_138215   | 1173  | No  | NA | 0   | 1 | Low-quality    | Genome-fragment | NA | 1.83  | 0     |
| S11_extracted_k141_17961   | 1465  | No  | NA | 0   | 2 | Not-determined | Genome-fragment | NA | 0     | 0     |
| S11_extracted_k141_36576   | 1442  | No  | NA | 0   | 1 | Not-determined | Genome-fragment | NA | 0     | 0     |
| S5_extracted_k141_80576    | 1173  | No  | NA | 0   | 0 | Low-quality    | Genome-fragment | NA | 2.67  | 0     |
| S5_vo_k141_2165   full     | 1173  | No  | NA | 0   | 0 | Low-quality    | Genome-fragment | NA | 3.46  | 0     |
| S11_extracted_k141_57448   | 5582  | No  | NA | 0   | 4 | Not-determined | Genome-fragment | NA | 0     | 0     |
| S5_vo_k141_61906   H2gene  | 1173  | No  | NA | 0   | 0 | Low-quality    | Genome-fragment | NA | 2.09  | 0     |
| S11_extracted_k141_96619   | 1790  | No  | NA | 0   | 1 | Not-determined | Genome-fragment | NA | 0     | 0     |
| S11_extracted_k141_76823   | 1242  | No  | NA | 0   | 1 | Not-determined | Genome-fragment | NA | 0     | 0     |
| S7_vo_27508   full         | 1173  | No  | NA | 0   | 0 | Low-quality    | Genome-fragment | NA | 4.2   | 0     |
| S11_extracted_k141_5139    | 5470  | No  | NA | 0   | 3 | Not-determined | Genome-fragment | NA | 0     | 0     |
| S16_vo_30253   full        | 1173  | No  | NA | 0   | 0 | Low-quality    | Genome-fragment | NA | 1.81  | 0     |
| S11_extracted_k141_69884   | 5002  | No  | NA | 0   | 1 | Not-determined | Genome-fragment | NA | 0     | 0     |
| S11_extracted_k141_44177   | 20513 | No  | NA | 0   | 1 | Not-determined | Genome-fragment | NA | 0     | 0     |
| S16_vo_159757   full       | 1173  | No  | NA | 3   | 0 | Low-quality    | Genome-fragment | NA | 1.94  | 0     |
| S10_vo_110434   H2gene     | 1173  | No  | NA | 0   | 0 | Low-quality    | Genome-fragment | NA | 2.79  | 0     |
| S11_extracted_k141_15366   | 1001  | No  | NA | 0   | 0 | Not-determined | Genome-fragment | NA | 0     | 0     |
| S11_extracted_k141_63427   | 2791  | No  | NA | 0   | 2 | Not-determined | Genome-fragment | NA | 0     | 0     |
| S11_extracted_k141_37722   | 4213  | No  | NA | 0   | 4 | Not-determined | Genome-fragment | NA | 0     | 0     |
| S11_extracted_k141_63439   | 1041  | No  | NA | 0   | 0 | Not-determined | Genome-fragment | NA | 0     | 0     |
| S12_vo_k141_113261   full  | 1173  | No  | NA | 0   | 0 | Low-quality    | Genome-fragment | NA | 3.44  | 0     |
| S11_extracted_k141_44266   | 1320  | No  | NA | 0   | 2 | Not-determined | Genome-fragment | NA | 0     | 0     |
| S4_extracted_25281         | 1173  | No  | NA | 2   | 0 | Low-quality    | Genome-fragment | NA | 1.94  | 0     |
| S11_extracted_k141_44276   | 2507  | No  | NA | 0   | 2 | Not-determined | Genome-fragment | NA | 0     | 0     |
| S11_extracted_k141_76969   | 1272  | No  | NA | 0   | 0 | Not-determined | Genome-fragment | NA | 0     | 0     |
| S8_vo_k141_1021   full     | 1173  | No  | NA | 0   | 2 | Low-quality    | Genome-fragment | NA | 0.67  | 0     |
| S11_extracted_k141_17758   | 3043  | No  | NA | 0   | 0 | Not-determined | Genome-fragment | NA | 0     | 0     |
| S11_extracted_k141_69710   | 1094  | No  | NA | 0   | 1 | Not-determined | Genome-fragment | NA | 0     | 0     |
| S11_extracted_k141_69716   | 1037  | No  | NA | 0   | 1 | Not-determined | Genome-fragment | NA | 0     | 0     |
| S11_extracted_k141_56735   | 1280  | No  | NA | 0   | 1 | Not-determined | Genome-fragment | NA | 0     | 0     |
| S11_extracted_k141_83018   | 1668  | No  | NA | 0   | 1 | Not-determined | Genome-fragment | NA | 0     | 0     |
| S8_vo_k141_197901   full   | 1173  | No  | NA | 1   | 0 | Low-quality    | Genome-fragment | NA | 2.79  | 0     |
| S11_extracted_k141_63524   | 1399  | No  | NA | 0   | 0 | Not-determined | Genome-fragment | NA | 0     | 0     |
| S11_extracted_k141_69748   | 2236  | No  | NA | 0   | 0 | Not-determined | Genome-fragment | NA | 0     | 0     |
| S11_extracted_k141_50116   | 1298  | No  | NA | 0   | 2 | Not-determined | Genome-fragment | NA | 0     | 0     |
| S8_vo_k141_155736   full   | 1173  | No  | NA | 0   | 1 | Low-quality    | Genome-fragment | NA | 1.47  | 0     |
| S11_extracted_k141_15448   | 1808  | No  | NA | 0   | 0 | Not-determined | Genome-fragment | NA | 0     | 0     |
| S11_extracted_k141_96761   | 1542  | No  | NA | 0   | 1 | Not-determined | Genome-fragment | NA | 0     | 0     |
| S9_extracted_k141_83057    | 1174  | No  | NA | 1   | 0 | Low-quality    | Genome-fragment | NA | 2.37  | 0     |
| S1_vo_k141_50470   full    | 1174  | No  | NA | 0   | 0 | Not-determined | Genome-fragment | NA | 2.48  | 0     |
| S11_extracted_k141_31004   | 1001  | No  | NA | 0   | 1 | Not-determined | Genome-fragment | NA | 0     | 0     |
| S11_extracted_k141_18183   | 1708  | No  | NA | 0   | 1 | Not-determined | Genome-fragment | NA | 0     | 0     |
| S14_extracted_k141_47056   | 1174  | No  | NA | 0   | 0 | Low-quality    | Genome-fragment | NA | 2.36  | 0     |
| S11_extracted_k141_1328    | 1384  | No  | NA | 0   | 0 | Not-determined | Genome-fragment | NA | 0     | 0     |
| S11_extracted_k141_96786   | 4251  | No  | NA | 0   | 1 | Not-determined | Genome-fragment | NA | 0     | 0     |
| S11_extracted_k141_96795   | 1921  | No  | NA | 0   | 1 | Not-determined | Genome-fragment | NA | 0     | 0     |
| S11_extracted_k141_98785   | 5915  | No  | NA | 0   | 0 | Not-determined | Genome-fragment | NA | 0     | 0     |
| S3_extracted_k141_119239   | 1174  | No  | NA | 0   | 1 | Low-quality    | Genome-fragment | NA | 0.38  | 0     |
| S3_vo_k141_112316   full   | 1174  | No  | NA | 0   | 0 | Low-quality    | Genome-fragment | NA | 2.03  | 0     |
| S11_extracted_k141_17887   | 2052  | No  | NA | 0   | 2 | Not-determined | Genome-fragment | NA | 0     | 0     |
| S11_extracted_k141_18207   | 3188  | No  | NA | 0   | 3 | Not-determined | Genome-fragment | NA | 0     | 0     |
| S11_extracted_k141_5345    | 1077  | No  | NA | 0   | 1 | Not-determined | Genome-fragment | NA | 0     | 0     |
| S11_extracted_k141_11745   | 1745  | No  | NA | 0   | 1 | Not-determined | Genome-fragment | NA | 0     | 0     |
| S11_extracted_k141_17619   | 1581  | No  | NA | 0   | 0 | Not-determined | Genome-fragment | NA | 0     | 0     |
| S11_extracted_k141_63649   | 2324  | No  | NA | 0   | 1 | Not-determined | Genome-fragment | NA | 0     | 0     |
| S11_extracted_k141_69850   | 1299  | No  | NA | 0   | 0 | Not-determined | Genome-fragment | NA | 0     | 0     |
| S11_extracted_k141_1538    | 1283  | No  | NA | 0   | 0 | Not-determined | Genome-fragment | NA | 0     | 0     |
| S11_extracted_k141_89818   | 2175  | No  | NA | 0   | 1 | Not-determined | Genome-fragment | NA | 0     | 0     |
| S5_extracted_k141_171229   | 1174  | No  | NA | 0   | 0 | Low-quality    | Genome-fragment | NA | 1.71  | 0     |
| S11_extracted_k141_15547   | 30782 | No  | NA | 0   | 1 | Not-determined | Genome-fragment | NA | 0     | 0     |
| S11_extracted_k141_5400    | 2890  | No  | NA | 0   | 3 | Not-determined | Genome-fragment | NA | 0     | 0     |
| S7_extracted_86406         | 1174  | No  | NA | 1   | 0 | Low-quality    | Genome-fragment | NA | 2.94  | 0     |
| S11_extracted_k141_56871   | 1110  | No  | NA | 1   | 1 | Not-determined | Genome-fragment | NA | 0     | 0     |
| S11_extracted_k141_57691   | 1754  | No  | NA | 0   | 2 | Not-determined | Genome-fragment | NA | 0     | 0     |
| S7_vo_12235   full         | 1174  | No  | NA | 0   | 0 | Low-quality    | Genome-fragment | NA | 2.29  | 0     |
| S7_vo_50872   full         | 1174  | No  | NA | 1   | 0 | Low-quality    | Genome-fragment | NA | 2.51  | 0     |
| S11_extracted_k141_83187   | 1476  | No  | NA | 0   | 0 | Not-determined | Genome-fragment | NA | 0     | 0     |
| S11_extracted_k141_63734   | 3939  | No  | NA | 0   | 3 | Not-determined | Genome-fragment | NA | 0     | 0     |
| S11_extracted_k141_50275   | 1377  | No  | NA | 0   | 1 | Not-determined | Genome-fragment | NA | 0     | 0     |
| S11_extracted_k141_37938   | 1041  | No  | NA | 0   | 0 | Not-determined | Genome-fragment | NA | 0     | 0     |
| S16_vo_61736   H2gene      | 1174  | No  | NA | 1   | 0 | Low-quality    | Genome-fragment | NA | 2.18  | 0     |
| S11_extracted_k141_25609   | 1043  | No  | NA | 0   | 0 | Not-determined | Genome-fragment | NA | 0     | 0     |
| S11_extracted_k141_11176   | 1161  | No  | NA | 0   | 1 | Not-determined | Genome-fragment | NA | 0     | 0     |
| S11_extracted_k141_77180   | 1381  | No  | NA | 0   | 1 | Not-determined | Genome-fragment | NA | 0     | 0     |
| S11_extracted_k141_57741   | 1168  | No  | NA | 0   | 2 | Not-determined | Genome-fragment | NA | 0     | 0     |
| S12_extracted_k141_135775  | 1174  | No  | NA | 1   | 0 | Low-quality    | Genome-fragment | NA | 2.9   | 0     |
| S12_extracted_k141_153379  | 1174  | No  | NA | 0   | 1 | Low-quality    | Genome-fragment | NA | 2.71  | 0     |
| S15_extracted_63938        | 1174  | No  | NA | 0   | 1 | Low-quality    | Genome-fragment | NA | 0.43  | 0     |
| S11_extracted_k141_44508   | 1173  | No  | NA | 0   | 1 | Not-determined | Genome-fragment | NA | 2.84  | 0     |
| S4_extracted               |       |     |    |     |   |                |                 |    |       |       |



|                           |       |    |    |    |   |                |                 |    |      |
|---------------------------|-------|----|----|----|---|----------------|-----------------|----|------|
| S11_extracted_k141_57792  | 1115  | No | NA | 0  | 3 | Not-determined | Genome-fragment | NA | 0    |
| S11_extracted_k141_44795  | 6103  | No | NA | 0  | 1 | Not-determined | Genome-fragment | NA | 0    |
| S11_extracted_k141_5778   | 4623  | No | NA | 0  | 1 | Not-determined | Genome-fragment | NA | 0    |
| S11_extracted_k141_57834  | 5233  | No | NA | 0  | 2 | Not-determined | Genome-fragment | NA | 0    |
| S11_extracted_k141_12093  | 1002  | No | NA | 0  | 0 | Not-determined | Genome-fragment | NA | 0    |
| S11_extracted_k141_53570  | 1174  | No | NA | 0  | 0 | Not-determined | Genome-fragment | NA | 0    |
| S11_extracted_k141_57848  | 1040  | No | NA | 0  | 0 | Not-determined | Genome-fragment | NA | 0    |
| S16_vs_13649[full]        | 1175  | No | NA | 0  | 0 | Low-quality    | Genome-fragment | NA | 1.81 |
| S11_extracted_k141_50584  | 1266  | No | NA | 0  | 1 | Not-determined | Genome-fragment | NA | 0    |
| S11_extracted_k141_83579  | 1037  | No | NA | 0  | 0 | Not-determined | Genome-fragment | NA | 0    |
| S11_extracted_k141_52896  | 1729  | No | NA | 0  | 2 | Not-determined | Genome-fragment | NA | 0    |
| S11_extracted_k141_57853  | 5314  | No | NA | 0  | 3 | Not-determined | Genome-fragment | NA | 0    |
| S11_extracted_k141_50602  | 1339  | No | NA | 0  | 0 | Not-determined | Genome-fragment | NA | 0    |
| S16_vs_154245[full]       | 1175  | No | NA | 1  | 0 | Low-quality    | Genome-fragment | NA | 1.72 |
| S11_extracted_k141_70164  | 1310  | No | NA | 0  | 2 | Not-determined | Genome-fragment | NA | 0    |
| S12_extracted_k141_53756  | 1175  | No | NA | 0  | 0 | Low-quality    | Genome-fragment | NA | 2.79 |
| S12_vs_k141_40229[full]   | 1175  | No | NA | 2  | 0 | Low-quality    | Genome-fragment | NA | 1.65 |
| S11_extracted_k141_18719  | 2230  | No | NA | 0  | 1 | Not-determined | Genome-fragment | NA | 0    |
| S11_extracted_k141_57802  | 1469  | No | NA | 0  | 1 | Not-determined | Genome-fragment | NA | 0    |
| S11_extracted_k141_90228  | 1336  | No | NA | 0  | 1 | Not-determined | Genome-fragment | NA | 0    |
| S11_extracted_k141_70198  | 1480  | No | NA | 0  | 0 | Not-determined | Genome-fragment | NA | 0    |
| S11_extracted_k141_12156  | 1573  | No | NA | 0  | 0 | Not-determined | Genome-fragment | NA | 0    |
| S8_extracted_k141_150071  | 1175  | No | NA | 0  | 0 | Low-quality    | Genome-fragment | NA | 4.08 |
| S11_extracted_k141_50660  | 1083  | No | NA | 0  | 0 | Not-determined | Genome-fragment | NA | 0    |
| S8_extracted_k141_124455  | 1175  | No | NA | 0  | 1 | Low-quality    | Genome-fragment | NA | 4.38 |
| S8_vs_k141_13459[full]    | 1175  | No | NA | 1  | 0 | Low-quality    | Genome-fragment | NA | 2.56 |
| S11_extracted_k141_64141  | 1021  | No | NA | 0  | 0 | Not-determined | Genome-fragment | NA | 0    |
| S11_extracted_k141_97222  | 1425  | No | NA | 0  | 0 | Not-determined | Genome-fragment | NA | 0    |
| S11_extracted_k141_98370  | 1765  | No | NA | 0  | 0 | Not-determined | Genome-fragment | NA | 0    |
| S11_extracted_k141_97227  | 1500  | No | NA | 0  | 1 | Not-determined | Genome-fragment | NA | 0    |
| S11_extracted_k141_97239  | 1157  | No | NA | 0  | 0 | Not-determined | Genome-fragment | NA | 0    |
| S11_extracted_k141_70231  | 1521  | No | NA | 0  | 2 | Not-determined | Genome-fragment | NA | 0    |
| S9_vs_k141_9709[full]     | 1176  | No | NA | 0  | 1 | Low-quality    | Genome-fragment | NA | 3.76 |
| S5_extracted_k141_129726  | 1176  | No | NA | 0  | 0 | Low-quality    | Genome-fragment | NA | 3.2  |
| S5_extracted_k141_96885   | 1176  | No | NA | 2  | 0 | Low-quality    | Genome-fragment | NA | 3.41 |
| S11_extracted_k141_18852  | 1221  | No | NA | 0  | 1 | Not-determined | Genome-fragment | NA | 0    |
| S11_extracted_k141_103213 | 1958  | No | NA | 0  | 0 | Not-determined | Genome-fragment | NA | 0    |
| S5_vs_k141_39654[full]    | 1176  | No | NA | 1  | 0 | Low-quality    | Genome-fragment | NA | 2.2  |
| S5_vs_k141_61214[full]    | 1176  | No | NA | 0  | 0 | Low-quality    | Genome-fragment | NA | 3.37 |
| S7_extracted_95070        | 1176  | No | NA | 1  | 0 | Low-quality    | Genome-fragment | NA | 2.5  |
| S7_vs_106314[full]        | 1176  | No | NA | 1  | 0 | Low-quality    | Genome-fragment | NA | 1.08 |
| S7_vs_136216[full]        | 1176  | No | NA | 0  | 0 | Low-quality    | Genome-fragment | NA | 2.24 |
| S16_vs_55382[full]        | 1176  | No | NA | 0  | 1 | Low-quality    | Genome-fragment | NA | 2.68 |
| S11_extracted_k141_12334  | 1041  | No | NA | 0  | 1 | Not-determined | Genome-fragment | NA | 0    |
| S10_extracted_98687       | 1176  | No | NA | 0  | 1 | Low-quality    | Genome-fragment | NA | 0.38 |
| S11_extracted_k141_90359  | 1332  | No | NA | 0  | 0 | Not-determined | Genome-fragment | NA | 0    |
| S11_extracted_k141_12339  | 1026  | No | NA | 0  | 1 | Not-determined | Genome-fragment | NA | 0    |
| S11_extracted_k141_64290  | 1582  | No | NA | 0  | 1 | Not-determined | Genome-fragment | NA | 0    |
| S11_extracted_k141_5987   | 3464  | No | NA | 0  | 0 | Not-determined | Genome-fragment | NA | 0    |
| S11_extracted_k141_5997   | 5679  | No | NA | 0  | 7 | Not-determined | Genome-fragment | NA | 0    |
| S12_extracted_k141_21515  | 1176  | No | NA | 0  | 0 | Low-quality    | Genome-fragment | NA | 2.27 |
| S12_vs_k141_8971[full]    | 1176  | No | NA | 0  | 1 | Not-determined | Genome-fragment | NA | 3.12 |
| S6_vs_k141_33822[full]    | 1176  | No | NA | 0  | 0 | Low-quality    | Genome-fragment | NA | 2.25 |
| S8_extracted_k141_95934   | 1176  | No | NA | 0  | 0 | Low-quality    | Genome-fragment | NA | 1.97 |
| S17_vs_k141_5974[full]    | 1177  | No | NA | 1  | 0 | Low-quality    | Genome-fragment | NA | 2.58 |
| S11_extracted_k141_77763  | 1034  | No | NA | 0  | 0 | Not-determined | Genome-fragment | NA | 0    |
| S11_extracted_k141_6030   | 1459  | No | NA | 0  | 0 | Not-determined | Genome-fragment | NA | 0    |
| S11_extracted_k141_97386  | 1015  | No | NA | 0  | 1 | Not-determined | Genome-fragment | NA | 0    |
| S11_extracted_k141_45012  | 1848  | No | NA | 0  | 0 | Not-determined | Genome-fragment | NA | 0    |
| S11_extracted_k141_103284 | 2526  | No | NA | 0  | 2 | Not-determined | Genome-fragment | NA | 0    |
| S11_extracted_k141_90457  | 1429  | No | NA | 0  | 0 | Not-determined | Genome-fragment | NA | 0    |
| S11_extracted_k141_14023  | 1177  | No | NA | 0  | 1 | Low-quality    | Genome-fragment | NA | 0.47 |
| S11_extracted_k141_12430  | 1005  | No | NA | 0  | 0 | Not-determined | Genome-fragment | NA | 0    |
| S11_extracted_k141_83856  | 2747  | No | NA | 0  | 2 | Not-determined | Genome-fragment | NA | 0    |
| S11_extracted_k141_64342  | 1093  | No | NA | 0  | 0 | Not-determined | Genome-fragment | NA | 0    |
| S11_extracted_k141_50840  | 1006  | No | NA | 0  | 0 | Not-determined | Genome-fragment | NA | 0    |
| S11_extracted_k141_103299 | 1334  | No | NA | 0  | 0 | Not-determined | Genome-fragment | NA | 0    |
| S11_extracted_k141_4088   | 5241  | No | NA | 0  | 3 | Not-determined | Genome-fragment | NA | 0    |
| S14_extracted_k141_89723  | 1177  | No | NA | 0  | 0 | Low-quality    | Genome-fragment | NA | 3.88 |
| S11_extracted_k141_31776  | 4997  | No | NA | 0  | 4 | Not-determined | Genome-fragment | NA | 0    |
| S11_extracted_k141_83896  | 1305  | No | NA | 0  | 0 | Not-determined | Genome-fragment | NA | 0    |
| S3_vs_k141_105526[full]   | 1177  | No | NA | 0  | 0 | Low-quality    | Genome-fragment | NA | 3.01 |
| S11_extracted_k141_103346 | 1159  | No | NA | 0  | 2 | Not-determined | Genome-fragment | NA | 0    |
| S11_extracted_k141_81806  | 1930  | No | NA | 0  | 0 | Not-determined | Genome-fragment | NA | 0    |
| S11_extracted_k141_21810  | 3188  | No | NA | 0  | 0 | Not-determined | Genome-fragment | NA | 0    |
| S5_extracted_k141_99842   | 1177  | No | NA | 1  | 0 | Low-quality    | Genome-fragment | NA | 3.12 |
| S11_extracted_k141_12534  | 1380  | No | NA | 0  | 1 | Not-determined | Genome-fragment | NA | 0    |
| S5_vs_k141_47536[full]    | 1177  | No | NA | 0  | 0 | Low-quality    | Genome-fragment | NA | 1.63 |
| S7_vs_36556[full]         | 1177  | No | NA | 0  | 0 | Low-quality    | Genome-fragment | NA | 2.72 |
| S7_vs_125564[full]        | 1177  | No | NA | 1  | 0 | Low-quality    | Genome-fragment | NA | 2.97 |
| S11_extracted_k141_12586  | 1312  | No | NA | 0  | 1 | Not-determined | Genome-fragment | NA | 0    |
| S11_extracted_k141_64478  | 1174  | No | NA | 0  | 1 | Not-determined | Genome-fragment | NA | 0    |
| S16_vs_54462[full]        | 1177  | No | NA | 2  | 0 | Low-quality    | Genome-fragment | NA | 2.74 |
| S16_vs_55575[full]        | 1177  | No | NA | 2  | 0 | Low-quality    | Genome-fragment | NA | 2.65 |
| S11_extracted_k141_51062  | 7054  | No | NA | 0  | 2 | Not-determined | Genome-fragment | NA | 0    |
| S11_extracted_k141_103387 | 1218  | No | NA | 0  | 0 | Not-determined | Genome-fragment | NA | 0    |
| S10_extracted_31884       | 1177  | No | NA | 2  | 0 | Low-quality    | Genome-fragment | NA | 3.7  |
| S6_vs_k141_36677[full]    | 1177  | No | NA | 2  | 0 | Low-quality    | Genome-fragment | NA | 2.57 |
| S8_vs_k141_12451[full]    | 1177  | No | NA | 0  | 0 | Low-quality    | Genome-fragment | NA | 2.28 |
| S11_extracted_k141_84088  | 1044  | No | NA | 0  | 1 | Not-determined | Genome-fragment | NA | 0    |
| S11_extracted_k141_84092  | 1210  | No | NA | 0  | 0 | Not-determined | Genome-fragment | NA | 0    |
| S11_extracted_k141_64548  | 1053  | No | NA | 0  | 0 | Not-determined | Genome-fragment | NA | 0    |
| S11_extracted_k141_84107  | 1261  | No | NA | 0  | 2 | Not-determined | Genome-fragment | NA | 0    |
| S11_extracted_k141_38632  | 1021  | No | NA | 0  | 0 | Not-determined | Genome-fragment | NA | 0    |
| S8_vs_k141_70893[full]    | 1177  | No | NA | 0  | 0 | Low-quality    | Genome-fragment | NA | 3.2  |
| S17_vs_k141_85955[full]   | 1178  | No | NA | 0  | 0 | Low-quality    | Genome-fragment | NA | 2.9  |
| S11_vs_k141_57710[full]   | 1178  | No | NA | 0  | 3 | Low-quality    | Genome-fragment | NA | 0.75 |
| S5_vs_k141_42597[full]    | 1178  | No | NA | 1  | 0 | Low-quality    | Genome-fragment | NA | 1.98 |
| S11_extracted_k141_6217   | 181   | No | NA | 0  | 1 | Not-determined | Genome-fragment | NA | 0    |
| S11_extracted_k141_31956  | 1869  | No | NA | 0  | 0 | Not-determined | Genome-fragment | NA | 0    |
| S11_extracted_k141_45384  | 1234  | No | NA | 0  | 1 | Not-determined | Genome-fragment | NA | 0    |
| S11_extracted_k141_65411  | 1508  | No | NA | 0  | 1 | Not-determined | Genome-fragment | NA | 0    |
| S3_vs_k141_119446[full]   | 1178  | No | NA | 1  | 0 | Low-quality    | Genome-fragment | NA | 0.76 |
| S11_extracted_k141_84172  | 2976  | No | NA | 0  | 2 | Not-determined | Genome-fragment | NA | 0    |
| S5_extracted_k141_81525   | 1178  | No | NA | 1  | 0 | Low-quality    | Genome-fragment | NA | 2.56 |
| S11_extracted_k141_84225  | 1090  | No | NA | 0  | 1 | Not-determined | Genome-fragment | NA | 0    |
| S5_vs_k141_136774[full]   | 1178  | No | NA | 1  | 0 | Low-quality    | Genome-fragment | NA | 2.06 |
| S11_extracted_k141_84662  | 1129  | No | NA | 0  | 1 | Not-determined | Genome-fragment | NA | 0    |
| S11_extracted_k141_38795  | 3286  | No | NA | 0  | 1 | Not-determined | Genome-fragment | NA | 0    |
| S5_vs_k141_11353[full]    | 1178  | No | NA | 1  | 0 | Low-quality    | Genome-fragment | NA | 2.68 |
| S7_extracted_97172        | 1178  | No | NA | 1  | 0 | Low-quality    | Genome-fragment | NA | 1.4  |
| S11_extracted_k141_54684  | 3253  | No | NA | 0  | 2 | Not-determined | Genome-fragment | NA | 0    |
| S7_vs_52502[full]         | 1178  | No | NA | 0  | 0 | Low-quality    | Genome-fragment | NA | 2.94 |
| S7_vs_63781[full]         | 1178  | No | NA | 0  | 0 | Low-quality    | Genome-fragment | NA | 1.3  |
| S11_extracted_k141_70640  | 2242  | No | NA | 0  | 1 | Not-determined | Genome-fragment | NA | 0    |
| S11_extracted_k141_64711  | 1164  | No | NA | 0  | 1 | Not-determined | Genome-fragment | NA | 0    |
| S11_extracted_k141_70645  | 1082  | No | NA | 0  | 1 | Not-determined | Genome-fragment | NA | 0    |
| S11_extracted_k141_58452  | 1062  | No | NA | 0  | 1 | Not-determined | Genome-fragment | NA | 0    |
| S10_vs_2091[full]         | 1178  | No | NA | 0  | 0 | Low-quality    | Genome-fragment | NA | 2.27 |
| S11_extracted_k141_58473  | 1268  | No | NA | 0  | 0 | Not-determined | Genome-fragment | NA | 0    |
| S10_vs_128072[full]       | 1178  | No | NA | 0  | 0 | Low-quality    | Genome-fragment | NA | 2.8  |
| S10_vs_13841[full]        | 1178  | No | NA | 0  | 0 | Low-quality    | Genome-fragment | NA | 2.2  |
| S11_extracted_k141_6372   | 2542  | No | NA | 0  | 0 | Not-determined | Genome-fragment | NA | 0    |
| S11_extracted_k141_58502  | 1157  | No | NA | 0  | 1 | Not-determined | Genome-fragment | NA | 0    |
| S11_extracted_k141_103619 | 1018  | No | NA | 0  | 0 | Not-determined | Genome-fragment | NA | 0    |
| S11_extracted_k141_90866  | 1666  | No | NA | 0  | 1 | Not-determined | Genome-fragment | NA | 0    |
| S11_extracted_k141_6409   | 2941  | No | NA | 0  | 2 | Not-determined | Genome-fragment | NA | 0    |
| S12_vs_k141_106114[full]  | 1178  | No | NA | 2  | 0 | Low-quality    | Genome-fragment | NA | 3.05 |
| S11_extracted_k141_84303  | 45395 | No | NA | 15 | 0 | Complete       | High-quality    | NA | 100  |
| S12_vs_k141_112914[full]  | 1178  | No | NA | 1  | 0 | Low-quality    | Genome-fragment | NA | 2.71 |
| S11_extracted_k141_51350  | 1941  | No | NA | 0  | 1 | Not-determined | Genome-fragment | NA | 0    |
| S12_vs_k141_137656[full]  | 1178  | No | NA | 0  | 0 | Low-quality    | Genome-fragment | NA | 3.63 |
| S15_extracted_41729       | 1178  | No | NA | 0  | 1 | Low-quality    | Genome-fragment | NA | 1.16 |
| S11_extracted_k141_84373  | 2609  | No | NA | 0  | 1 | Not-determined | Genome-fragment | NA | 0    |
| S11_extracted_k141_45513  | 1229  | No | NA | 0  | 2 | Not-determined | Genome-fragment | NA | 0    |
| S11_extracted_k141_38929  | 1479  | No | NA | 0  | 0 | Not-determined | Genome-fragment | NA | 0    |
| S8_extracted_k141_138842  | 1178  | No | NA | 1  | 0 | Low-quality    | Genome-fragment | NA | 1.96 |
| S11_extracted_k141_103696 | 5294  | No | NA | 0  | 3 | Not-determined | Genome-fragment | NA | 0    |
| S11_extracted_k141_70820  | 1391  | No | NA | 0  | 0 | Not-determined | Genome-fragment | NA | 0    |
| S11_extracted_k141_103699 | 4593  | No | NA | 0  | 4 | Not-determined | Genome-fragment | NA | 0    |
| S11_extracted_k141_38998  | 1205  | No | NA | 0  | 1 | Not-determined | Genome-fragment | NA | 0    |
| S11_extracted_k141_19520  | 1825  | No | NA | 0  | 1 | Not-determined | Genome-fragment | NA | 0    |
| S11_extracted_k141_51476  | 5408  | No | NA | 0  | 4 | Not-determined | Genome-fragment | NA | 0    |
| S11_extracted_k141_64913  | 1116  | No | NA | 0  | 0 | Not-determined | Genome-fragment | NA | 0    |
| S11_extracted_k141_64947  | 1156  | No | NA | 0  | 0 | Not-determined | Genome-fragment | NA |      |



|                           |       |     |       |    |    |                |                 |       |       |
|---------------------------|-------|-----|-------|----|----|----------------|-----------------|-------|-------|
| S11_extracted_k141_104062 | 34888 | No  | NA    | 12 | 0  | Complete       | High-quality    | 100   | 0     |
| S11_extracted_k141_104070 | 36162 | No  | NA    | 27 | 0  | Complete       | High-quality    | 100   | 0     |
| S11_extracted_k141_104071 | 36582 | No  | NA    | 8  | 0  | Complete       | High-quality    | 100   | 0     |
| S11_vs_k141_84627  full   | 39772 | No  | NA    | 10 | 0  | High-quality   | High-quality    | 100   | 0     |
| S11_extracted_k141_40235  | 1179  | No  | NA    | 0  | 1  | Low-quality    | Genome-fragment | 0.31  | 0     |
| S11_vs_k141_20912  full   | 2051  | No  | NA    | 0  | 0  | Not-determined | Genome-fragment | NA    | 0     |
| S11_vs_k141_40945  full   | 44575 | No  | NA    | 17 | 0  | High-quality   | High-quality    | 99.31 | 0     |
| S11_vs_k141_93101  full   | 23434 | No  | NA    | 7  | 0  | High-quality   | High-quality    | 99.44 | 0     |
| S11_vs_k141_30061  full   | 12415 | No  | NA    | 17 | 0  | Medium-quality | Genome-fragment | 88.09 | 0     |
| S11_vs_k141_75554  full   | 16322 | No  | NA    | 7  | 0  | Medium-quality | Genome-fragment | 83.95 | 0     |
| S11_vs_k141_49071  full   | 89156 | No  | NA    | 29 | 0  | High-quality   | High-quality    | 100   | 0     |
| S11_vs_k141_36748  full   | 46377 | No  | NA    | 14 | 0  | High-quality   | High-quality    | 100   | 0     |
| S11_vs_k141_82368  full   | 45487 | No  | NA    | 22 | 0  | High-quality   | High-quality    | 100   | 0     |
| S11_vs_k141_104032  full  | 44004 | No  | NA    | 23 | 2  | High-quality   | High-quality    | 100   | 0     |
| S11_vs_k141_104036  full  | 48912 | No  | NA    | 15 | 1  | High-quality   | High-quality    | 96.17 | 0     |
| S11_vs_k141_104037  full  | 54218 | No  | NA    | 15 | 0  | High-quality   | High-quality    | 100   | 0     |
| S11_vs_k141_104038  full  | 34262 | No  | NA    | 22 | 0  | Medium-quality | Genome-fragment | 89.66 | 0     |
| S11_vs_k141_104041  full  | 36201 | No  | NA    | 16 | 2  | High-quality   | High-quality    | 100   | 0     |
| S11_vs_k141_104042  full  | 27250 | No  | 35552 | 18 | 2  | Medium-quality | Genome-fragment | 89.78 | 4.66  |
| S11_vs_k141_104047  full  | 33359 | Yes | 30866 | 19 | 2  | Medium-quality | Genome-fragment | 85.83 | 7.47  |
| S11_vs_k141_104049  full  | 38479 | No  | NA    | 13 | 0  | High-quality   | High-quality    | 100   | 0     |
| S3_extracted_k141_49619   | 1179  | No  | NA    | 0  | 0  | Low-quality    | Genome-fragment | 0.77  | 0     |
| S3_extracted_k141_84800   | 1179  | No  | NA    | 0  | 0  | Low-quality    | Genome-fragment | 2.04  | 0     |
| S11_vs_k141_104053  full  | 13498 | No  | NA    | 6  | 0  | High-quality   | High-quality    | 99.05 | 0     |
| S11_vs_k141_104054  full  | 29886 | No  | NA    | 14 | 0  | Medium-quality | Genome-fragment | 74.75 | 0     |
| S11_vs_k141_104061  full  | 15739 | No  | NA    | 0  | 3  | Not-determined | Genome-fragment | NA    | 0     |
| S11_vs_k141_104064  full  | 58041 | No  | NA    | 35 | 0  | High-quality   | High-quality    | 96.25 | 0     |
| S11_vs_k141_104069  full  | 44378 | No  | NA    | 7  | 0  | High-quality   | High-quality    | 99.41 | 0     |
| S3_vs_k141_63810  full    | 1179  | No  | NA    | 0  | 0  | Low-quality    | Genome-fragment | 0.14  | 0     |
| S5_extracted_k141_62607   | 1179  | No  | NA    | 1  | 0  | Low-quality    | Genome-fragment | 1.76  | 0     |
| S5_extracted_k141_27629   | 1179  | No  | NA    | 1  | 0  | Low-quality    | Genome-fragment | 2.91  | 0     |
| S11_vs_k141_97632  full   | 3846  | No  | NA    | 0  | 0  | Not-determined | Genome-fragment | NA    | 0     |
| S7_vs_106547  H2gene      | 1179  | No  | NA    | 1  | 0  | Low-quality    | Genome-fragment | 3.44  | 0     |
| S11_vs_k141_52091  full   | 1570  | No  | NA    | 0  | 0  | Not-determined | Genome-fragment | NA    | 0     |
| S11_vs_k141_38  full      | 1170  | No  | NA    | 0  | 0  | Not-determined | Genome-fragment | NA    | 0     |
| S11_vs_k141_26054  full   | 2814  | No  | NA    | 0  | 0  | Not-determined | Genome-fragment | NA    | 0     |
| S7_vs_110702  H2gene      | 1179  | No  | NA    | 2  | 0  | Low-quality    | Genome-fragment | 3.94  | 0     |
| S16_extracted_67340       | 1179  | No  | NA    | 1  | 0  | Low-quality    | Genome-fragment | 3.14  | 0     |
| S16_vs_58739  full        | 1179  | No  | NA    | 0  | 0  | Low-quality    | Genome-fragment | 2.84  | 0     |
| S10_vs_3709  full         | 1179  | No  | NA    | 0  | 0  | Low-quality    | Genome-fragment | 2.7   | 0     |
| S11_vs_k141_19558  full   | 1174  | No  | NA    | 0  | 1  | Not-determined | Genome-fragment | NA    | 0     |
| S11_vs_k141_78148  full   | 6382  | No  | NA    | 3  | 0  | Not-determined | Genome-fragment | NA    | 0     |
| S10_vs_108096  full       | 1179  | No  | NA    | 0  | 0  | Low-quality    | Genome-fragment | 2.07  | 0     |
| S11_vs_k141_39092  full   | 1911  | No  | NA    | 0  | 2  | Not-determined | Genome-fragment | NA    | 0     |
| S11_vs_k141_89  full      | 1511  | No  | NA    | 0  | 0  | Not-determined | Genome-fragment | NA    | 0     |
| S11_vs_k141_58652  full   | 1387  | No  | NA    | 0  | 1  | Not-determined | Genome-fragment | NA    | 0     |
| S11_vs_k141_58656  full   | 2995  | No  | NA    | 0  | 2  | Not-determined | Genome-fragment | NA    | 0     |
| S12_vs_k141_13649  full   | 1179  | No  | NA    | 0  | 0  | Low-quality    | Genome-fragment | 2.43  | 0     |
| S4_extracted_3543         | 1179  | No  | NA    | 0  | 0  | Low-quality    | Genome-fragment | 3.88  | 0     |
| S11_vs_k141_97678  full   | 1483  | No  | NA    | 0  | 0  | Not-determined | Genome-fragment | NA    | 0     |
| S11_vs_k141_97680  full   | 4205  | No  | NA    | 0  | 2  | Not-determined | Genome-fragment | NA    | 0     |
| S11_vs_k141_97686  full   | 5948  | No  | NA    | 0  | 5  | Not-determined | Genome-fragment | NA    | 0     |
| S11_vs_k141_32630  full   | 1482  | No  | NA    | 0  | 0  | Not-determined | Genome-fragment | NA    | 0     |
| S11_vs_k141_141  full     | 2228  | No  | NA    | 0  | 0  | Not-determined | Genome-fragment | NA    | 0     |
| S4_extracted_15274        | 1179  | No  | NA    | 2  | 0  | Low-quality    | Genome-fragment | NA    | 3.75  |
| S11_vs_k141_164  full     | 1860  | No  | NA    | 0  | 0  | Not-determined | Genome-fragment | NA    | 0     |
| S11_vs_k141_52268  full   | 1298  | No  | NA    | 0  | 2  | Not-determined | Genome-fragment | NA    | 0     |
| S8_extracted_k141_195776  | 1179  | No  | NA    | 0  | 0  | Low-quality    | Genome-fragment | 2.97  | 0     |
| S11_vs_k141_198  full     | 1435  | No  | NA    | 0  | 1  | Not-determined | Genome-fragment | NA    | 0     |
| S8_vs_k141_77053  full    | 1179  | No  | NA    | 0  | 0  | Low-quality    | Genome-fragment | 1.62  | 0     |
| S9_extracted_k141_76326   | 1180  | No  | NA    | 2  | 0  | Low-quality    | Genome-fragment | 1.96  | 0     |
| S11_vs_k141_78168  full   | 1789  | No  | NA    | 0  | 0  | Not-determined | Genome-fragment | NA    | 0     |
| S11_vs_k141_241  full     | 2577  | No  | NA    | 0  | 2  | Not-determined | Genome-fragment | NA    | 0     |
| S9_vs_k141_16353  full    | 1180  | No  | NA    | 1  | 0  | Low-quality    | Genome-fragment | 1.94  | 0     |
| S9_vs_k141_89484  full    | 1180  | No  | NA    | 0  | 0  | Low-quality    | Genome-fragment | 1.69  | 0     |
| S11_vs_k141_91307  full   | 1605  | No  | NA    | 0  | 1  | Not-determined | Genome-fragment | NA    | 0     |
| S13_vs_19606  full        | 1180  | No  | NA    | 0  | 0  | Low-quality    | Genome-fragment | 2.26  | 0     |
| S14_vs_k141_71229  full   | 1180  | No  | NA    | 0  | 0  | Low-quality    | Genome-fragment | 2.6   | 0     |
| S11_vs_k141_78182  full   | 1379  | No  | NA    | 0  | 0  | Not-determined | Genome-fragment | NA    | 0     |
| S11_vs_k141_58702  full   | 22627 | No  | NA    | 22 | 0  | Medium-quality | Genome-fragment | 50.16 | 0     |
| S5_vs_k141_99160  full    | 1180  | No  | NA    | 0  | 0  | Low-quality    | Genome-fragment | 2.98  | 0     |
| S7_vs_38683  full         | 1180  | No  | NA    | 1  | 1  | Low-quality    | Genome-fragment | 3.79  | 0     |
| S16_vs_50070  full        | 1180  | No  | NA    | 1  | 0  | Low-quality    | Genome-fragment | 3.43  | 0     |
| S11_vs_k141_91331  full   | 3980  | No  | NA    | 0  | 2  | Not-determined | Genome-fragment | NA    | 0     |
| S16_vs_74182  full        | 1180  | No  | NA    | 4  | 0  | Low-quality    | Genome-fragment | NA    | 2.74  |
| S12_vs_k141_57041  full   | 1180  | No  | NA    | 0  | 0  | Low-quality    | Genome-fragment | 0.62  | 0     |
| S12_vs_k141_105454  full  | 1180  | No  | NA    | 2  | 0  | Low-quality    | Genome-fragment | 3.37  | 0     |
| S11_vs_k141_71754  full   | 1501  | No  | NA    | 0  | 2  | Not-determined | Genome-fragment | NA    | 0     |
| S11_vs_k141_39137  full   | 8026  | No  | NA    | 4  | 0  | Not-determined | Genome-fragment | NA    | 0     |
| S12_vs_k141_77407  full   | 1180  | No  | NA    | 0  | 0  | Low-quality    | Genome-fragment | 0.92  | 0     |
| S11_vs_k141_84824  full   | 1517  | No  | NA    | 0  | 1  | Not-determined | Genome-fragment | NA    | 0     |
| S11_vs_k141_65321  full   | 2719  | No  | NA    | 0  | 0  | Not-determined | Genome-fragment | NA    | 0     |
| S11_vs_k141_65304  full   | 1578  | No  | NA    | 0  | 2  | Not-determined | Genome-fragment | NA    | 0     |
| S11_vs_k141_78305  full   | 2042  | No  | NA    | 0  | 0  | Not-determined | Genome-fragment | NA    | 0     |
| S15_extracted_46552       | 1180  | No  | NA    | 0  | 1  | Low-quality    | Genome-fragment | NA    | 0.51  |
| S11_vs_k141_65307  full   | 3715  | No  | NA    | 0  | 2  | Not-determined | Genome-fragment | NA    | 0     |
| S4_extracted_30904        | 1180  | No  | NA    | 1  | 0  | Low-quality    | Genome-fragment | 3.62  | 0     |
| S11_vs_k141_58776  full   | 6054  | No  | NA    | 0  | 0  | Not-determined | Genome-fragment | NA    | 0     |
| S11_vs_k141_45658  full   | 71315 | Yes | 44246 | 12 | 97 | Medium-quality | Genome-fragment | 68.29 | 74.45 |
| S8_extracted_k141_317554  | 1180  | No  | NA    | 1  | 0  | Low-quality    | Genome-fragment | 0.94  | 0     |
| S11_vs_k141_84848  full   | 41615 | No  | NA    | 7  | 4  | High-quality   | High-quality    | 97.21 | 0     |
| S8_extracted_k141_189188  | 1180  | No  | NA    | 0  | 0  | Low-quality    | Genome-fragment | 0.73  | 0     |
| S9_extracted_k141_56314   | 1181  | No  | NA    | 0  | 0  | Low-quality    | Genome-fragment | 1.33  | 0     |
| S11_vs_k141_75246  full   | 1181  | No  | NA    | 0  | 0  | Low-quality    | Genome-fragment | 2.01  | 0     |
| S13_vs_149550  full       | 1181  | No  | NA    | 0  | 0  | Low-quality    | Genome-fragment | 2.28  | 0     |
| S11_vs_k141_32832  full   | 9578  | No  | NA    | 0  | 1  | Not-determined | Genome-fragment | NA    | 0     |
| S11_vs_k141_45708  full   | 3235  | No  | NA    | 0  | 2  | Not-determined | Genome-fragment | NA    | 0     |
| S14_vs_k141_84436  full   | 1181  | No  | NA    | 1  | 0  | Low-quality    | Genome-fragment | 1.37  | 0     |
| S11_vs_k141_39279  full   | 11329 | No  | NA    | 0  | 1  | Not-determined | Genome-fragment | NA    | 0     |
| S11_vs_k141_84917  full   | 1019  | No  | NA    | 0  | 1  | Not-determined | Genome-fragment | NA    | 0     |
| S14_vs_k141_55408  H2gene | 1181  | No  | NA    | 1  | 0  | Low-quality    | Genome-fragment | 3.03  | 0     |
| S3_vs_k141_48729  H2gene  | 1181  | No  | NA    | 2  | 0  | Low-quality    | Genome-fragment | 2.73  | 0     |
| S3_vs_k141_18921  H2gene  | 1181  | No  | NA    | 1  | 0  | Low-quality    | Genome-fragment | 2.72  | 0     |
| S5_vs_k141_127576  full   | 1181  | No  | NA    | 0  | 0  | Low-quality    | Genome-fragment | 3.31  | 0     |
| S5_vs_k141_144078  full   | 1181  | No  | NA    | 0  | 0  | Low-quality    | Genome-fragment | 1.48  | 0     |
| S11_vs_k141_97971  full   | 1274  | No  | NA    | 0  | 2  | Not-determined | Genome-fragment | NA    | 0     |
| S7_vs_80234  full         | 1181  | No  | NA    | 1  | 0  | Low-quality    | Genome-fragment | 2.67  | 0     |
| S16_vs_130283  full       | 1181  | No  | NA    | 0  | 0  | Low-quality    | Genome-fragment | 2.54  | 0     |
| S11_vs_k141_67761  full   | 1283  | No  | NA    | 0  | 0  | Not-determined | Genome-fragment | NA    | 0     |
| S11_vs_k141_65387  full   | 1118  | No  | NA    | 0  | 1  | Not-determined | Genome-fragment | NA    | 0     |
| S11_vs_k141_5221  full    | 1458  | No  | NA    | 0  | 0  | Not-determined | Genome-fragment | NA    | 0     |
| S10_extracted_27010       | 1181  | No  | NA    | 0  | 0  | Low-quality    | Genome-fragment | NA    | 0.48  |
| S11_vs_k141_71899  full   | 1384  | No  | NA    | 0  | 1  | Not-determined | Genome-fragment | NA    | 0     |
| S11_vs_k141_52430  full   | 1413  | No  | NA    | 0  | 0  | Not-determined | Genome-fragment | NA    | 0     |
| S11_vs_k141_62483  full   | 4456  | No  | NA    | 0  | 0  | Not-determined | Genome-fragment | NA    | 0     |
| S10_extracted_29788       | 1181  | No  | NA    | 0  | 0  | Low-quality    | Genome-fragment | 1.09  | 0     |
| S10_vs_38491  full        | 1181  | No  | NA    | 0  | 1  | Low-quality    | Genome-fragment | 2.88  | 0     |
| S12_extracted_k141_37863  | 1181  | No  | NA    | 0  | 0  | Low-quality    | Genome-fragment | 3.07  | 0     |
| S12_vs_k141_23771  H2gene | 1181  | No  | NA    | 0  | 0  | Low-quality    | Genome-fragment | 2.79  | 0     |
| S6_vs_k141_47337  full    | 1181  | No  | NA    | 0  | 0  | Low-quality    | Genome-fragment | 2.71  | 0     |
| S9_extracted_k141_39952   | 1182  | No  | NA    | 1  | 0  | Low-quality    | Genome-fragment | 2.77  | 0     |
| S9_extracted_k141_90161   | 1182  | No  | NA    | 0  | 0  | Low-quality    | Genome-fragment | 2.56  | 0     |
| S11_vs_k141_19892  full   | 31610 | No  | NA    | 14 | 1  | Medium-quality | Genome-fragment | 70.43 | 0     |
| S11_vs_k141_78527  full   | 1440  | No  | NA    | 0  | 1  | Not-determined | Genome-fragment | NA    | 0.82  |
| S13_extracted_147053      | 1182  | No  | NA    | 0  | 0  | Low-quality    | Genome-fragment | NA    | 0     |
| S11_vs_k141_78534  full   | 2945  | No  | NA    | 0  | 1  | Not-determined | Genome-fragment | NA    | 0     |
| S14_extracted_k141_30302  | 1182  | No  | NA    | 2  | 0  | Low-quality    | Genome-fragment | 3.9   | 0     |
| S11_vs_k141_58028  full   | 4940  | No  | NA    | 0  | 1  | Not-determined | Genome-fragment | NA    | 0     |
| S14_extracted_k141_56841  | 1182  | No  | NA    | 2  | 0  | Low-quality    | Genome-fragment | 1.97  | 0     |
| S11_vs_k141_32947  full   | 3095  | No  | NA    | 0  | 1  | Not-determined | Genome-fragment | NA    | 0     |
| S1_extracted_k141_2888    | 1182  | No  | NA    | 2  | 0  | Low-quality    | Genome-fragment | 2.12  | 0     |
| S11_vs_k141_32954  full   | 6115  | No  | NA    | 0  | 2  | Not-determined | Genome-fragment | NA    | 0     |
| S3_extracted_k141_89126   | 1182  | No  | NA    | 0  | 0  | Low-quality    | Genome-fragment | 0.67  | 0     |
| S3_vs_k141_91791  full    | 1182  | No  | NA    | 0  | 0  | Low-quality    | Genome-fragment | 2.15  | 0     |
| S5_vs_k141_33053  full    | 1182  | No  | NA    | 0  | 0  | Low-quality    | Genome-fragment | 2.72  | 0     |
| S5_vs_k141_73724  full    | 1182  | No  | NA    | 1  | 0  | Low-quality    | Genome-fragment | 3.41  | 0     |
| S5_vs_k141_78804  full    | 1182  | No  | NA    | 0  | 0  | Low-quality    | Genome-fragment | 2.7   | 0     |
| S11_vs_k141_52949  full   | 20446 | No  | NA    | 0  | 1  | Not-determined | Genome-fragment | NA    | 0     |
| S5_vs_k141_45282  H2gene  | 1182  | No  | NA    | 1  | 0  | Low-quality    | Genome-fragment | 2.69  | 0     |
| S16_vs_40552  H2gene      | 1182  | No  | NA    | 1  | 0  | Low-quality    | Genome-fragment | 1.92  | 0     |
| S11_vs_k141_68781  full   | 42579 | No  | NA    | 23 | 2  | High-quality   | High-quality    | 97.62 | 0     |
| S11_vs_k141_58930  full   | 2349  | No  | NA    | 6  | 3  | Medium-quality | Genome-fragment | 55.51 | 0     |
| S11_vs_k141_98098  full   | 3879  | No  | NA    |    |    |                |                 |       |       |



|                            |       |    |    |    |   |                |                 |       |   |
|----------------------------|-------|----|----|----|---|----------------|-----------------|-------|---|
| S11_extracted_k141_103628  | 1184  | No | NA | 0  | 0 | Low-quality    | Genome-fragment | 2.59  | 0 |
| S11_vx_k141_70121 full     | 1020  | No | NA | 0  | 0 | Not-determined | Genome-fragment | NA    | 0 |
| S13_extracted_21061        | 1184  | No | NA | 0  | 0 | Low-quality    | Genome-fragment | 1.18  | 0 |
| S14_vx_k141_122241 full    | 1184  | No | NA | 2  | 0 | Low-quality    | Genome-fragment | 2.76  | 0 |
| S11_vx_k141_396841 full    | 1446  | No | NA | 0  | 2 | Not-determined | Genome-fragment | NA    | 0 |
| S3_vx_k141_118391 full     | 1184  | No | NA | 0  | 0 | Low-quality    | Genome-fragment | 0.89  | 0 |
| S5_extracted_k141_137803   | 1184  | No | NA | 0  | 0 | Low-quality    | Genome-fragment | 0.56  | 0 |
| S5_vx_k141_37301 H2gene    | 1184  | No | NA | 1  | 0 | Low-quality    | Genome-fragment | 3.01  | 0 |
| S7_extracted_50670         | 1184  | No | NA | 1  | 0 | Low-quality    | Genome-fragment | 0.32  | 0 |
| S7_vx_246851 full          | 1184  | No | NA | 1  | 0 | Low-quality    | Genome-fragment | 3.37  | 0 |
| S16_vx_51831 full          | 1184  | No | NA | 0  | 0 | Low-quality    | Genome-fragment | 1.62  | 0 |
| S16_vx_704651 full         | 1184  | No | NA | 0  | 0 | Low-quality    | Genome-fragment | 2.13  | 0 |
| S10_extracted_114582       | 1184  | No | NA | 0  | 1 | Low-quality    | Genome-fragment | 2.38  | 0 |
| S10_vx_1014451 full        | 1184  | No | NA | 2  | 0 | Low-quality    | Genome-fragment | 3.65  | 0 |
| S8_extracted_k141_185375   | 1184  | No | NA | 1  | 0 | Low-quality    | Genome-fragment | 0.65  | 0 |
| S11_vx_k141_134881 full    | 4117  | No | NA | 0  | 3 | Not-determined | Genome-fragment | NA    | 0 |
| S8_vx_k141_1041541 full    | 1184  | No | NA | 1  | 0 | Low-quality    | Genome-fragment | 0.45  | 0 |
| S17_vx_k141_1385281 full   | 1185  | No | NA | 3  | 0 | Low-quality    | Genome-fragment | 5.4   | 0 |
| S11_vx_k141_202251 full    | 36296 | No | NA | 20 | 0 | High-quality   | Genome-fragment | 94.18 | 0 |
| S11_vx_k141_461481 full    | 3225  | No | NA | 0  | 1 | Not-determined | Genome-fragment | NA    | 0 |
| S14_vx_k141_843291 full    | 1185  | No | NA | 0  | 0 | Low-quality    | Genome-fragment | 3.03  | 0 |
| S11_vx_k141_556881 full    | 1028  | No | NA | 0  | 0 | Not-determined | Genome-fragment | NA    | 0 |
| S1_vx_k141_961891 full     | 1185  | No | NA | 1  | 0 | Low-quality    | Genome-fragment | 2.95  | 0 |
| S5_vx_k141_682101 full     | 1185  | No | NA | 1  | 0 | Low-quality    | Genome-fragment | 3.22  | 0 |
| S11_vx_k141_918681 full    | 4055  | No | NA | 0  | 5 | Not-determined | Genome-fragment | NA    | 0 |
| S5_vx_k141_1346981 full    | 1185  | No | NA | 0  | 0 | Low-quality    | Genome-fragment | 2     | 0 |
| S11_vx_k141_788851 full    | 2349  | No | NA | 0  | 3 | Not-determined | Genome-fragment | NA    | 0 |
| S7_extracted_74842         | 1185  | No | NA | 0  | 1 | Low-quality    | Genome-fragment | 1.3   | 0 |
| S11_vx_k141_788881 full    | 6125  | No | NA | 5  | 2 | Not-determined | Genome-fragment | NA    | 0 |
| S7_vx_587991 H2gene        | 1185  | No | NA | 1  | 0 | Low-quality    | Genome-fragment | 4.01  | 0 |
| S10_extracted_1440         | 1185  | No | NA | 1  | 0 | Low-quality    | Genome-fragment | 2.9   | 0 |
| S10_extracted_71399        | 1185  | No | NA | 0  | 0 | Low-quality    | Genome-fragment | 1.22  | 0 |
| S12_extracted_k141_20737   | 1185  | No | NA | 1  | 0 | Low-quality    | Genome-fragment | 1.93  | 0 |
| S12_extracted_k141_22664   | 1185  | No | NA | 0  | 0 | Low-quality    | Genome-fragment | 2.15  | 0 |
| S11_vx_k141_267671 full    | 24781 | No | NA | 22 | 0 | Medium-quality | Genome-fragment | 56.42 | 0 |
| S11_vx_k141_854051 full    | 1500  | No | NA | 1  | 1 | Not-determined | Genome-fragment | NA    | 0 |
| S11_vx_k141_203211 full    | 6360  | No | NA | 0  | 0 | Not-determined | Genome-fragment | NA    | 0 |
| S11_vx_k141_854111 full    | 1250  | No | NA | 0  | 1 | Not-determined | Genome-fragment | NA    | 0 |
| S11_vx_k141_462581 full    | 6617  | No | NA | 0  | 3 | Not-determined | Genome-fragment | NA    | 0 |
| S12_extracted_k141_38280   | 1185  | No | NA | 1  | 0 | Low-quality    | Genome-fragment | 1.41  | 0 |
| S12_vx_k141_650501 full    | 1185  | No | NA | 2  | 0 | Low-quality    | Genome-fragment | 2.68  | 0 |
| S15_vx_12081 full          | 1185  | No | NA | 0  | 0 | Low-quality    | Genome-fragment | 2.43  | 0 |
| S11_vx_k141_397581 full    | 6279  | No | NA | 0  | 4 | Not-determined | Genome-fragment | NA    | 0 |
| S11_vx_k141_9651 full      | 1768  | No | NA | 0  | 0 | Not-determined | Genome-fragment | NA    | 0 |
| S4_extracted_4201          | 1185  | No | NA | 2  | 0 | Low-quality    | Genome-fragment | 3.22  | 0 |
| S11_vx_k141_268241 full    | 2034  | No | NA | 1  | 1 | Not-determined | Genome-fragment | NA    | 0 |
| S8_extracted_k141_79984    | 1185  | No | NA | 1  | 0 | Low-quality    | Genome-fragment | 2.86  | 0 |
| S8_extracted_k141_144545   | 1185  | No | NA | 0  | 0 | Low-quality    | Genome-fragment | 0.33  | 0 |
| S11_vx_k141_527771 full    | 6559  | No | NA | 3  | 1 | Not-determined | Genome-fragment | NA    | 0 |
| S8_extracted_k141_127308   | 1185  | No | NA | 0  | 0 | Low-quality    | Genome-fragment | 2.27  | 0 |
| S11_vx_k141_657671 full    | 4200  | No | NA | 0  | 0 | Not-determined | Genome-fragment | NA    | 0 |
| S8_vx_k141_694941 full     | 1185  | No | NA | 0  | 2 | Low-quality    | Genome-fragment | 0.31  | 0 |
| S7_vx_k141_1345991 full    | 1186  | No | NA | 0  | 0 | Low-quality    | Genome-fragment | 0.69  | 0 |
| S14_extracted_k141_64368   | 1186  | No | NA | 3  | 0 | Low-quality    | Genome-fragment | 3.92  | 0 |
| S1_vx_k141_859481 full     | 1186  | No | NA | 0  | 0 | Low-quality    | Genome-fragment | 2.8   | 0 |
| S11_vx_k141_854631 full    | 1083  | No | NA | 0  | 2 | Not-determined | Genome-fragment | NA    | 0 |
| S11_vx_k141_790131 full    | 2418  | No | NA | 0  | 0 | Not-determined | Genome-fragment | NA    | 0 |
| S3_vx_k141_109461 full     | 1186  | No | NA | 0  | 0 | Low-quality    | Genome-fragment | 2.74  | 0 |
| S3_vx_k141_601651 full     | 1186  | No | NA | 0  | 0 | Low-quality    | Genome-fragment | 2     | 0 |
| S5_extracted_k141_23080    | 1186  | No | NA | 1  | 0 | Low-quality    | Genome-fragment | 1.95  | 0 |
| S5_vx_k141_746291 full     | 1186  | No | NA | 0  | 0 | Low-quality    | Genome-fragment | 2.78  | 0 |
| S7_extracted_9509          | 1186  | No | NA | 0  | 1 | Low-quality    | Genome-fragment | 0.23  | 0 |
| S11_vx_k141_855021 full    | 1487  | No | NA | 0  | 0 | Not-determined | Genome-fragment | NA    | 0 |
| S16_vx_179371 full         | 1186  | No | NA | 0  | 0 | Low-quality    | Genome-fragment | 0.87  | 0 |
| S11_vx_k141_985211 full    | 2613  | No | NA | 0  | 0 | Not-determined | Genome-fragment | NA    | 0 |
| S12_extracted_k141_88724   | 1186  | No | NA | 0  | 0 | Low-quality    | Genome-fragment | 0.8   | 0 |
| S11_vx_k141_658301 full    | 3231  | No | NA | 0  | 2 | Not-determined | Genome-fragment | NA    | 0 |
| S2_extracted_k141_2522     | 1186  | No | NA | 0  | 1 | Low-quality    | Genome-fragment | 1.53  | 0 |
| S11_vx_k141_463731 full    | 2650  | No | NA | 0  | 0 | Not-determined | Genome-fragment | NA    | 0 |
| S8_extracted_k141_81977    | 1186  | No | NA | 1  | 0 | Low-quality    | Genome-fragment | 3.83  | 0 |
| S8_extracted_k141_55430    | 1186  | No | NA | 0  | 1 | Low-quality    | Genome-fragment | 0.39  | 0 |
| S11_vx_k141_790501 full    | 1187  | No | NA | 0  | 1 | Not-determined | Genome-fragment | NA    | 0 |
| S11_vx_k141_592351 full    | 3991  | No | NA | 0  | 3 | Not-determined | Genome-fragment | NA    | 0 |
| S11_vx_k141_204491 full    | 6871  | No | NA | 0  | 3 | Not-determined | Genome-fragment | NA    | 0 |
| S8_vx_k141_1549811 full    | 1186  | No | NA | 1  | 0 | Low-quality    | Genome-fragment | 1.55  | 0 |
| S8_vx_k141_1722361 H2gene  | 1186  | No | NA | 1  | 0 | Low-quality    | Genome-fragment | 2.39  | 0 |
| S11_vx_k141_592451 full    | 1158  | No | NA | 0  | 2 | Not-determined | Genome-fragment | NA    | 0 |
| S11_vx_k141_529071 full    | 2121  | No | NA | 0  | 0 | Not-determined | Genome-fragment | NA    | 0 |
| S11_vx_k141_755541 full    | 4244  | No | NA | 0  | 3 | Not-determined | Genome-fragment | NA    | 0 |
| S11_vx_k141_71881 full     | 1579  | No | NA | 0  | 0 | Not-determined | Genome-fragment | NA    | 0 |
| S17_extracted_k141_117189  | 1187  | No | NA | 4  | 0 | Low-quality    | Genome-fragment | 5.42  | 0 |
| S11_vx_k141_529201 full    | 1762  | No | NA | 0  | 0 | Not-determined | Genome-fragment | NA    | 0 |
| S17_extracted_k141_166294  | 1187  | No | NA | 0  | 0 | Low-quality    | Genome-fragment | 0.69  | 0 |
| S17_vx_k141_313991 full    | 1187  | No | NA | 0  | 0 | Low-quality    | Genome-fragment | 1.07  | 0 |
| S17_vx_k141_1513571 H2gene | 1187  | No | NA | 0  | 0 | Low-quality    | Genome-fragment | 1.55  | 0 |
| S11_vx_k141_921241 full    | 1227  | No | NA | 0  | 1 | Not-determined | Genome-fragment | NA    | 0 |
| S11_vx_k141_464521 full    | 1006  | No | NA | 0  | 1 | Not-determined | Genome-fragment | NA    | 0 |
| S14_vx_k141_537261 full    | 1187  | No | NA | 0  | 0 | Low-quality    | Genome-fragment | 3.08  | 0 |
| S1_vx_k141_674521 full     | 1187  | No | NA | 0  | 0 | Low-quality    | Genome-fragment | 2.91  | 0 |
| S3_vx_k141_637881 full     | 1187  | No | NA | 4  | 0 | Low-quality    | Genome-fragment | 3.05  | 0 |
| S5_vx_k141_996371 full     | 1187  | No | NA | 0  | 1 | Low-quality    | Genome-fragment | 2.38  | 0 |
| S7_vx_384511 full          | 1187  | No | NA | 0  | 0 | Low-quality    | Genome-fragment | 0.28  | 0 |
| S11_vx_k141_399611 full    | 1839  | No | NA | 0  | 0 | Not-determined | Genome-fragment | NA    | 0 |
| S11_vx_k141_726171 full    | 4667  | No | NA | 0  | 4 | Not-determined | Genome-fragment | NA    | 0 |
| S11_vx_k141_726361 full    | 1804  | No | NA | 0  | 0 | Not-determined | Genome-fragment | NA    | 0 |
| S11_vx_k141_726391 full    | 1176  | No | NA | 0  | 2 | Not-determined | Genome-fragment | NA    | 0 |
| S7_vx_866351 full          | 1187  | No | NA | 1  | 0 | Low-quality    | Genome-fragment | 2.75  | 0 |
| S11_vx_k141_334761 full    | 1406  | No | NA | 0  | 1 | Not-determined | Genome-fragment | NA    | 0 |
| S7_vx_869741 H2gene        | 1187  | No | NA | 0  | 0 | Low-quality    | Genome-fragment | 1.94  | 0 |
| S12_extracted_k141_182681  | 1187  | No | NA | 0  | 1 | Low-quality    | Genome-fragment | 3.03  | 0 |
| S12_extracted_k141_156797  | 1187  | No | NA | 0  | 0 | Low-quality    | Genome-fragment | 0.84  | 0 |
| S8_extracted_k141_101923   | 1187  | No | NA | 0  | 0 | Low-quality    | Genome-fragment | 1.81  | 0 |
| S8_extracted_k141_51254    | 1187  | No | NA | 2  | 0 | Low-quality    | Genome-fragment | 1.58  | 0 |
| S11_vx_k141_921881 full    | 2499  | No | NA | 0  | 1 | Not-determined | Genome-fragment | NA    | 0 |
| S11_vx_k141_792421 full    | 1442  | No | NA | 0  | 0 | Not-determined | Genome-fragment | NA    | 0 |
| S11_vx_k141_136081 full    | 1520  | No | NA | 0  | 0 | Not-determined | Genome-fragment | NA    | 0 |
| S17_extracted_k141_94680   | 1188  | No | NA | 0  | 1 | Low-quality    | Genome-fragment | 0.91  | 0 |
| S9_extracted_k141_34801    | 1188  | No | NA | 1  | 0 | Low-quality    | Genome-fragment | 2.51  | 0 |
| S11_vx_k141_727181 full    | 2084  | No | NA | 0  | 0 | Not-determined | Genome-fragment | NA    | 0 |
| S9_extracted_k141_43750    | 1188  | No | NA | 0  | 0 | Low-quality    | Genome-fragment | 0.68  | 0 |
| S14_extracted_k141_137168  | 1188  | No | NA | 0  | 0 | Low-quality    | Genome-fragment | 3.16  | 0 |
| S11_vx_k141_660351 full    | 1472  | No | NA | 0  | 1 | Not-determined | Genome-fragment | NA    | 0 |
| S14_vx_k141_215221 H2gene  | 1188  | No | NA | 1  | 0 | Low-quality    | Genome-fragment | 2.25  | 0 |
| S3_extracted_k141_77597    | 1188  | No | NA | 2  | 0 | Low-quality    | Genome-fragment | 3.42  | 0 |
| S11_vx_k141_660461 full    | 2425  | No | NA | 0  | 1 | Not-determined | Genome-fragment | NA    | 0 |
| S3_vx_k141_93371 H2gene    | 1188  | No | NA | 2  | 0 | Low-quality    | Genome-fragment | 1.98  | 0 |
| S11_vx_k141_727381 full    | 7722  | No | NA | 0  | 3 | Not-determined | Genome-fragment | NA    | 0 |
| S5_vx_k141_1082121 full    | 1188  | No | NA | 0  | 1 | Low-quality    | Genome-fragment | 0.71  | 0 |
| S7_extracted_82107         | 1188  | No | NA | 0  | 0 | Low-quality    | Genome-fragment | 2.86  | 0 |
| S11_vx_k141_792751 full    | 35525 | No | NA | 8  | 3 | High-quality   | Genome-fragment | 91.26 | 0 |
| S11_vx_k141_136521 full    | 20079 | No | NA | 18 | 1 | Medium-quality | Genome-fragment | 63.85 | 0 |
| S7_vx_232101 full          | 1188  | No | NA | 0  | 0 | Low-quality    | Genome-fragment | 2.65  | 0 |
| S16_extracted_80512        | 1188  | No | NA | 0  | 0 | Low-quality    | Genome-fragment | 2.6   | 0 |
| S16_extracted_94149        | 1188  | No | NA | 0  | 0 | Low-quality    | Genome-fragment | 1.21  | 0 |
| S11_vx_k141_170521 full    | 1404  | No | NA | 0  | 1 | Not-determined | Genome-fragment | NA    | 0 |
| S11_vx_k141_12701 full     | 3222  | No | NA | 0  | 2 | Not-determined | Genome-fragment | NA    | 0 |
| S16_vx_585251 full         | 1188  | No | NA | 0  | 0 | Low-quality    | Genome-fragment | 2.87  | 0 |
| S12_extracted_k141_140314  | 1188  | No | NA | 0  | 1 | Low-quality    | Genome-fragment | 1.06  | 0 |
| S11_vx_k141_206871 full    | 3996  | No | NA | 0  | 2 | Not-determined | Genome-fragment | NA    | 0 |
| S12_vx_k141_691201 full    | 1188  | No | NA | 0  | 0 | Low-quality    | Genome-fragment | 3.79  | 0 |
| S4_extracted_5677          | 1188  | No | NA | 2  | 0 | Low-quality    | Genome-fragment | 3.92  | 0 |
| S6_extracted_k141_30838    | 1188  | No | NA | 0  | 1 | Low-quality    | Genome-fragment | 0.73  | 0 |
| S8_extracted_k141_106538   | 1188  | No | NA | 0  | 1 | Low-quality    | Genome-fragment | 1.86  | 0 |
| S11_vx_k141_401191 full    | 5231  | No | NA | 0  | 3 | Not-determined | Genome-fragment | NA    | 0 |
| S8_extracted_k141_71536    | 1188  | No | NA | 0  | 0 | Low-quality    | Genome-fragment | 2.82  | 0 |
| S8_extracted_k141_4533     | 1188  | No | NA | 2  | 0 | Low-quality    | Genome-fragment | 2.11  | 0 |
| S11_vx_k141_136931 full    | 6355  | No | NA | 0  | 1 | Not-determined | Genome-fragment | NA    | 0 |
| S11_vx_k141_987931 full    | 1600  | No | NA | 0  | 0 | Not-determined | Genome-fragment | NA    | 0 |
| S17_extracted_k141_127838  | 1189  | No | NA | 0  | 1 | Low-quality    | Genome-fragment | 0.83  | 0 |
| S11_vx_k141_918791 H2gene  | 1189  | No | NA | 1  | 0 | Low-quality    | Genome-fragment | 18.32 | 0 |
| S14_extracted_k141_67432   | 1189  | No | NA | 0  | 1 | Low-quality    | Genome-fragment | 1.25  | 0 |
| S11_vx_k141_75111 full     |       |    |    |    |   |                |                 |       |   |



|                            |       |     |       |    |                |                 |                 |       |      |
|----------------------------|-------|-----|-------|----|----------------|-----------------|-----------------|-------|------|
| S11_extracted_k141_965     | 1191  | No  | NA    | 0  | 0              | Low-quality     | Genome-fragment | 2.14  | 0    |
| S1_vo_k141_99502  full     | 1191  | No  | NA    | 0  | 0              | Low-quality     | Genome-fragment | 2.23  | 0    |
| S3_vo_k141_104097  full    | 1191  | No  | NA    | 0  | 0              | Low-quality     | Genome-fragment | 3.12  | 0    |
| S11_vo_k141_86123  full    | 3390  | No  | NA    | 0  | 1              | Not-determined  | Genome-fragment | NA    | 0    |
| S11_vo_k141_46770  full    | 2725  | No  | NA    | 0  | 1              | Not-determined  | Genome-fragment | NA    | 0    |
| S5_extracted_k141_122928   | 1191  | No  | NA    | 0  | 1              | Low-quality     | Genome-fragment | 0.4   | 0    |
| S11_vo_k141_13996  full    | 1462  | No  | NA    | 0  | 1              | Not-determined  | Genome-fragment | NA    | 0    |
| S11_vo_k141_59813  full    | 2836  | No  | NA    | 0  | 1              | Not-determined  | Genome-fragment | NA    | 0    |
| S11_vo_k141_73172  full    | 6391  | No  | NA    | 0  | 0              | Not-determined  | Genome-fragment | NA    | 0    |
| S11_vo_k141_66326  full    | 1626  | No  | NA    | 0  | 3              | Not-determined  | Genome-fragment | NA    | 0    |
| S5_extracted_k141_79386    | 1191  | No  | NA    | 0  | 0              | Low-quality     | Genome-fragment | 2.78  | 0    |
| S16_extracted_123553       | 1191  | No  | NA    | 0  | 0              | Low-quality     | Genome-fragment | 1.57  | 0    |
| S16_vo_89394  full         | 1191  | No  | NA    | 0  | 0              | Low-quality     | Genome-fragment | 3.05  | 0    |
| S11_vo_k141_86204  full    | 4969  | No  | NA    | 0  | 2              | Not-determined  | Genome-fragment | NA    | 0    |
| S16_vo_154841  full        | 1191  | No  | NA    | 0  | 0              | Low-quality     | Genome-fragment | 2.4   | 0    |
| S11_vo_k141_79545  full    | 5080  | No  | NA    | 0  | 3              | Not-determined  | Genome-fragment | NA    | 0    |
| S12_vo_k141_20764  full    | 1191  | No  | NA    | 0  | 0              | Low-quality     | Genome-fragment | 2.27  | 0    |
| S11_vo_k141_27397  full    | 1767  | No  | NA    | 0  | 1              | Not-determined  | Genome-fragment | NA    | 0    |
| S8_extracted_k141_154703   | 1191  | No  | NA    | 2  | 0              | Low-quality     | Genome-fragment | 6.09  | 0    |
| S8_vo_k141_18408  full     | 1191  | No  | NA    | 2  | 0              | Low-quality     | Genome-fragment | 2.32  | 0    |
| S11_vo_k141_27404  full    | 2695  | No  | NA    | 0  | 0              | Not-determined  | Genome-fragment | NA    | 0    |
| S17_extracted_k141_171577  | 1192  | No  | NA    | 1  | 0              | Low-quality     | Genome-fragment | 3.2   | 0    |
| S17_extracted_k141_64912   | 1192  | No  | NA    | 0  | 0              | Low-quality     | Genome-fragment | 2.64  | 0    |
| S11_vo_k141_51872  full    | 1192  | No  | NA    | 1  | 0              | Low-quality     | Genome-fragment | 2.8   | 0    |
| S14_extracted_k141_55824   | 1192  | No  | NA    | 0  | 0              | Low-quality     | Genome-fragment | 3.68  | 0    |
| S11_vo_k141_86137  full    | 6858  | No  | NA    | 0  | 1              | Not-determined  | Genome-fragment | NA    | 0    |
| S14_extracted_k141_50131   | 1192  | No  | NA    | 0  | 0              | Low-quality     | Genome-fragment | 2.78  | 0    |
| S5_vo_k141_101905  full    | 1192  | No  | NA    | 0  | 0              | Low-quality     | Genome-fragment | 3.18  | 0    |
| S11_vo_k141_73471  full    | 2646  | No  | NA    | 2  | Not-determined | Genome-fragment | NA              | 0     |      |
| S5_vo_k141_131114  H2gene  | 1192  | No  | NA    | 1  | 0              | Low-quality     | Genome-fragment | 2.61  | 0    |
| S7_vo_62320  full          | 1192  | No  | NA    | 1  | 0              | Low-quality     | Genome-fragment | 1.99  | 0    |
| S11_vo_k141_402971  full   | 1978  | No  | NA    | 2  | Not-determined | Genome-fragment | NA              | 0     |      |
| S11_vo_k141_1731  full     | 1203  | No  | NA    | 0  | 2              | Not-determined  | Genome-fragment | NA    | 0    |
| S10_vo_62678  full         | 1192  | No  | NA    | 0  | 1              | Low-quality     | Genome-fragment | 1.55  | 0    |
| S11_vo_k141_90688  full    | 1254  | No  | NA    | 0  | 0              | Not-determined  | Genome-fragment | NA    | 0    |
| S6_vo_k141_142311  full    | 1192  | No  | NA    | 0  | 0              | Low-quality     | Genome-fragment | 0.78  | 0    |
| S11_vo_k141_40421  full    | 2754  | No  | NA    | 0  | 1              | Not-determined  | Genome-fragment | NA    | 0    |
| S11_vo_k141_66411  full    | 1880  | No  | NA    | 0  | 0              | Not-determined  | Genome-fragment | NA    | 0    |
| S11_vo_k141_42022  full    | 1121  | No  | NA    | 0  | 0              | Not-determined  | Genome-fragment | NA    | 0    |
| S8_extracted_k141_61476    | 1192  | No  | NA    | 0  | 0              | Low-quality     | Genome-fragment | 3.09  | 0    |
| S11_vo_k141_21120  full    | 2540  | No  | NA    | 0  | 1              | Not-determined  | Genome-fragment | NA    | 0    |
| S8_vo_k141_122707  full    | 1192  | No  | NA    | 0  | 0              | Low-quality     | Genome-fragment | 2.62  | 0    |
| S11_vo_k141_46940  full    | 3866  | No  | NA    | 0  | 0              | Not-determined  | Genome-fragment | NA    | 0    |
| S11_vo_k141_73316  full    | 2989  | No  | NA    | 0  | 2              | Not-determined  | Genome-fragment | NA    | 0    |
| S11_vo_k141_93090  H2gene  | 1193  | No  | NA    | 1  | 0              | Low-quality     | Genome-fragment | 2.12  | 0    |
| S11_vo_k141_79712  full    | 1603  | No  | NA    | 3  | Not-determined | Genome-fragment | NA              | 0     |      |
| S11_vo_k141_21189  full    | 1599  | No  | NA    | 0  | 0              | Not-determined  | Genome-fragment | NA    | 0    |
| S11_vo_k141_99152  full    | 1242  | No  | NA    | 0  | 0              | Not-determined  | Genome-fragment | NA    | 0    |
| S14_extracted_k141_87583   | 1193  | No  | NA    | 0  | 0              | Low-quality     | Genome-fragment | 4.11  | 0    |
| S11_vo_k141_79756  full    | 1939  | No  | NA    | 0  | 2              | Not-determined  | Genome-fragment | NA    | 0    |
| S14_vo_k141_19691  full    | 1193  | No  | NA    | 0  | 0              | Low-quality     | Genome-fragment | 3.01  | 0    |
| S2_extracted_k141_20389    | 1193  | No  | NA    | 0  | 0              | Low-quality     | Genome-fragment | 3.8   | 0    |
| S11_vo_k141_14357  full    | 2431  | No  | NA    | 0  | 1              | Not-determined  | Genome-fragment | NA    | 0    |
| S11_vo_k141_1899  full     | 5275  | No  | NA    | 0  | 4              | Not-determined  | Genome-fragment | NA    | 0    |
| S3_extracted_k141_103569   | 1193  | No  | NA    | 1  | 0              | Low-quality     | Genome-fragment | 0.78  | 0    |
| S3_vo_k141_118817  full    | 1193  | No  | NA    | 0  | 0              | Low-quality     | Genome-fragment | 2.67  | 0    |
| S11_vo_k141_53675  full    | 20682 | No  | NA    | 9  | 2              | Medium-quality  | Genome-fragment | 57.33 | 0    |
| S11_vo_k141_27717  full    | 1172  | No  | NA    | 0  | 0              | Not-determined  | Genome-fragment | NA    | 0    |
| S11_vo_k141_14383  full    | 1762  | No  | NA    | 0  | 1              | Not-determined  | Genome-fragment | NA    | 0    |
| S11_vo_k141_21281  full    | 1985  | No  | NA    | 0  | 1              | Not-determined  | Genome-fragment | NA    | 0    |
| S11_vo_k141_53702  full    | 1891  | No  | NA    | 0  | 1              | Not-determined  | Genome-fragment | NA    | 0    |
| S5_extracted_k141_4128     | 1193  | No  | NA    | 0  | 0              | Low-quality     | Genome-fragment | 2.39  | 0    |
| S5_extracted_k141_64239    | 1193  | No  | NA    | 2  | 0              | Low-quality     | Genome-fragment | 0.62  | 0    |
| S5_vo_k141_39698  full     | 1193  | No  | NA    | 0  | 0              | Low-quality     | Genome-fragment | 2.24  | 0    |
| S7_vo_109186  full         | 1193  | No  | NA    | 0  | 0              | Low-quality     | Genome-fragment | 2.85  | 0    |
| S7_vo_137050  H2gene       | 1193  | No  | NA    | 1  | 0              | Low-quality     | Genome-fragment | 2.13  | 0    |
| S16_extracted_91382        | 1193  | No  | NA    | 0  | 0              | Low-quality     | Genome-fragment | 0.87  | 0    |
| S11_vo_k141_60051  full    | 2152  | No  | NA    | 0  | 1              | Not-determined  | Genome-fragment | NA    | 0    |
| S10_extracted_50806        | 1193  | No  | NA    | 0  | 0              | Low-quality     | Genome-fragment | 2.58  | 0    |
| S12_extracted_k141_159636  | 1193  | No  | NA    | 0  | 0              | Low-quality     | Genome-fragment | 2.73  | 0    |
| S15_vo_7036  H2gene        | 1193  | No  | NA    | 1  | 0              | Low-quality     | Genome-fragment | 1.9   | 0    |
| S11_vo_k141_47131  full    | 1286  | No  | NA    | 0  | 0              | Not-determined  | Genome-fragment | NA    | 0    |
| S11_vo_k141_79831  full    | 40938 | No  | NA    | 6  | 3              | Medium-quality  | Genome-fragment | 72.66 | 0    |
| S8_extracted_k141_46933    | 1193  | No  | NA    | 1  | 0              | Low-quality     | Genome-fragment | 1.21  | 0    |
| S11_vo_k141_1937  full     | 35578 | Yes | 32094 | 5  | 3              | Medium-quality  | Genome-fragment | 55.13 | 9.79 |
| S8_vo_k141_147582  full    | 1193  | No  | NA    | 0  | 1              | Low-quality     | Genome-fragment | 1.06  | 0    |
| S17_vo_k141_153854  H2gene | 1194  | No  | NA    | 0  | 0              | Low-quality     | Genome-fragment | 2.78  | 0    |
| S17_vo_k141_176021  H2gene | 1194  | No  | NA    | 1  | 0              | Low-quality     | Genome-fragment | 3.75  | 0    |
| S11_vo_k141_21394  full    | 8678  | No  | NA    | 0  | 1              | Not-determined  | Genome-fragment | NA    | 0    |
| S11_vo_k141_64419  full    | 1194  | No  | NA    | 1  | 0              | Low-quality     | Genome-fragment | 2.97  | 0    |
| S14_extracted_k141_83317   | 1194  | No  | NA    | 1  | 0              | Low-quality     | Genome-fragment | 2.18  | 0    |
| S11_vo_k141_53816  full    | 2374  | No  | NA    | 0  | 2              | Not-determined  | Genome-fragment | NA    | 0    |
| S11_vo_k141_66652  full    | 3285  | No  | NA    | 0  | 1              | Not-determined  | Genome-fragment | NA    | 0    |
| S11_vo_k141_60106  full    | 1680  | No  | NA    | 0  | 0              | Not-determined  | Genome-fragment | NA    | 0    |
| S3_extracted_k141_110651   | 1194  | No  | NA    | 0  | 0              | Low-quality     | Genome-fragment | 0.85  | 0    |
| S11_vo_k141_1976  full     | 3017  | No  | NA    | 0  | 2              | Not-determined  | Genome-fragment | NA    | 0    |
| S5_vo_k141_44105  H2gene   | 1194  | No  | NA    | 2  | 0              | Low-quality     | Genome-fragment | 1.74  | 0    |
| S11_vo_k141_73489  full    | 2445  | No  | NA    | 0  | 3              | Not-determined  | Genome-fragment | NA    | 0    |
| S11_vo_k141_66673  full    | 5522  | No  | NA    | 0  | 3              | Not-determined  | Genome-fragment | NA    | 0    |
| S11_vo_k141_86484  full    | 3508  | No  | NA    | 0  | 2              | Not-determined  | Genome-fragment | NA    | 0    |
| S16_extracted_52725        | 1194  | No  | NA    | 0  | 0              | Low-quality     | Genome-fragment | 2.91  | 0    |
| S11_vo_k141_99330  full    | 2707  | No  | NA    | 0  | 1              | Not-determined  | Genome-fragment | NA    | 0    |
| S11_vo_k141_53878  full    | 1038  | No  | NA    | 0  | 0              | Not-determined  | Genome-fragment | NA    | 0    |
| S11_vo_k141_92722  full    | 4325  | No  | NA    | 0  | 2              | Not-determined  | Genome-fragment | NA    | 0    |
| S11_vo_k141_47186  full    | 2317  | No  | NA    | 0  | 1              | Not-determined  | Genome-fragment | NA    | 0    |
| S16_extracted_57774        | 1194  | No  | NA    | 0  | 0              | Low-quality     | Genome-fragment | 0.59  | 0    |
| S11_vo_k141_53886  full    | 4505  | No  | NA    | 0  | 0              | Not-determined  | Genome-fragment | NA    | 0    |
| S11_vo_k141_21461  full    | 4894  | No  | NA    | 0  | 0              | Not-determined  | Genome-fragment | NA    | 0    |
| S10_extracted_102235       | 1194  | No  | NA    | 0  | 0              | Low-quality     | Genome-fragment | 2.02  | 0    |
| S11_vo_k141_2034  full     | 1493  | No  | NA    | 0  | 1              | Not-determined  | Genome-fragment | NA    | 0    |
| S12_extracted_k141_114951  | 1194  | No  | NA    | 0  | 0              | Low-quality     | Genome-fragment | 1.07  | 0    |
| S11_vo_k141_13950  full    | 2392  | No  | NA    | 0  | 2              | Not-determined  | Genome-fragment | NA    | 0    |
| S11_vo_k141_79921  full    | 1300  | No  | NA    | 0  | 0              | Not-determined  | Genome-fragment | NA    | 0    |
| S11_vo_k141_92769  full    | 1220  | No  | NA    | 0  | 0              | Not-determined  | Genome-fragment | NA    | 0    |
| S12_vo_k141_64858  H2gene  | 1194  | No  | NA    | 0  | 0              | Low-quality     | Genome-fragment | 2.29  | 0    |
| S11_vo_k141_73576  full    | 1293  | No  | NA    | 0  | 1              | Not-determined  | Genome-fragment | NA    | 0    |
| S15_extracted_37891        | 1194  | No  | NA    | 1  | 0              | Low-quality     | Genome-fragment | 1.49  | 0    |
| S11_vo_k141_86583  full    | 1848  | No  | NA    | 0  | 0              | Not-determined  | Genome-fragment | NA    | 0    |
| S8_extracted_k141_177800   | 1194  | No  | NA    | 0  | 2              | Low-quality     | Genome-fragment | 0.69  | 0    |
| S17_vo_k141_156381  full   | 1195  | No  | NA    | 0  | 0              | Low-quality     | Genome-fragment | 1.7   | 0    |
| S11_vo_k141_21552  full    | 4212  | No  | NA    | 0  | 2              | Not-determined  | Genome-fragment | NA    | 0    |
| S11_vo_k141_86637  full    | 412   | No  | NA    | 0  | 2              | Not-determined  | Genome-fragment | NA    | 0    |
| S17_vo_k141_127297  full   | 1195  | No  | NA    | 1  | 0              | Low-quality     | Genome-fragment | 1.38  | 0    |
| S11_vo_k141_86626  full    | 1996  | No  | NA    | 0  | 2              | Not-determined  | Genome-fragment | NA    | 0    |
| S11_vo_k141_54007  full    | 1790  | No  | NA    | 0  | 0              | Not-determined  | Genome-fragment | NA    | 0    |
| S9_extracted_k141_88072    | 1195  | No  | NA    | 0  | 0              | Low-quality     | Genome-fragment | 2.29  | 0    |
| S11_vo_k141_23719  full    | 1195  | No  | NA    | 2  | 0              | Low-quality     | Genome-fragment | 2.37  | 0    |
| S12_extracted_122087       | 1195  | No  | NA    | 0  | 1              | Low-quality     | Genome-fragment | 0.29  | 0    |
| S13_vo_16371  full         | 1195  | No  | NA    | 0  | 0              | Low-quality     | Genome-fragment | 1.99  | 0    |
| S13_vo_16798  full         | 1195  | No  | NA    | 0  | 1              | Low-quality     | Genome-fragment | 3.1   | 0    |
| S14_vo_k141_55971  full    | 1195  | No  | NA    | 1  | 0              | Low-quality     | Genome-fragment | 0.89  | 0    |
| S3_vo_k141_59021  full     | 1195  | No  | NA    | 0  | 0              | Low-quality     | Genome-fragment | 3.4   | 0    |
| S11_vo_k141_73621  full    | 1524  | No  | NA    | 0  | 1              | Not-determined  | Genome-fragment | NA    | 0    |
| S5_vo_k141_70704  full     | 1195  | No  | NA    | 0  | 0              | Low-quality     | Genome-fragment | 0.77  | 0    |
| S5_vo_k141_61548  H2gene   | 1195  | No  | NA    | 0  | 0              | Low-quality     | Genome-fragment | 2.6   | 0    |
| S11_vo_k141_86682  full    | 1098  | No  | NA    | 0  | 0              | Not-determined  | Genome-fragment | NA    | 0    |
| S11_vo_k141_80057  full    | 6788  | No  | NA    | 0  | 2              | Not-determined  | Genome-fragment | NA    | 0    |
| S11_vo_k141_99505  full    | 3263  | No  | NA    | 0  | 4              | Not-determined  | Genome-fragment | NA    | 0    |
| S11_vo_k141_40762  full    | 2864  | No  | NA    | 0  | 3              | Not-determined  | Genome-fragment | NA    | 0    |
| S7_extracted_76225         | 1195  | No  | NA    | 0  | 0              | Low-quality     | Genome-fragment | 1.8   | 0    |
| S11_vo_k141_92845  full    | 1288  | No  | NA    | 0  | 0              | Not-determined  | Genome-fragment | NA    | 0    |
| S7_vo_46346  full          | 1195  | No  | NA    | 2  | 1              | Low-quality     | Genome-fragment | 0.4   | 0    |
| S10_vo_37263  H2gene       | 1195  | No  | NA    | 1  | 0              | Low-quality     | Genome-fragment | 1.75  | 0    |
| S11_vo_k141_84561  full    | 36244 | No  | NA    | 19 | 0              | High-quality    | High-quality    | 98.52 | 0    |
| S11_vo_k141_14610  full    | 2102  | No  | NA    | 0  | 3              | Not-determined  | Genome-fragment | NA    | 0    |
| S12_extracted_k141_67938   | 1195  | No  | NA    | 0  | 1              | Low-quality     | Genome-fragment | 2.7   | 0    |
| S12_vo_k141_39535  full    | 1195  | No  | NA    | 0  | 2              | Low-quality     | Genome-fragment | 1.1   | 0    |
| S12_vo_k141_51935  full    | 1195  | No  | NA    | 2  | 0              | Low-quality     | Genome-fragment | 3.37  | 0    |
| S11_vo_k141_22261  full    | 1458  | No  | NA    | 0  | 0              | Not-determined  | Genome-fragment | NA    | 0    |
| S11_vo_k141_146551  full   | 1917  | No  | NA    | 0  | 0              | Not-determined  | Genome-fragment | NA    | 0    |
| S11_vo_k141_84981  full    | 2540  | No  | NA    | 0  | 0              | Not-determined  | Genome-fragment | NA    | 0    |
| S11_vo_k141_92937  full    | 2788  | No  | NA    | 0  | 0              | Not-determined  | Genome-fragment | NA    | 0    |
| S11                        |       |     |       |    |                |                 |                 |       |      |



|                           |           |       |    |    |                |                 |                 |       |   |
|---------------------------|-----------|-------|----|----|----------------|-----------------|-----------------|-------|---|
| 58_vs_k141_89209          | [full]    | 1196  | NA | 0  | 0              | Low-quality     | Genome-fragment | 1.47  | 0 |
| 59_vs_k141_37532          | [full]    | 1197  | NA | 0  | 0              | Low-quality     | Genome-fragment | 0.76  | 0 |
| 511_vs_k141_73902         | [full]    | 1286  | NA | 0  | 0              | Not-determined  | Genome-fragment | NA    | 0 |
| 513_vs_27135              | [full]    | 1197  | NA | 1  | 0              | Low-quality     | Genome-fragment | 2.4   | 0 |
| 514_extracted_k141_752    |           | 1197  | NA | 5  | 0              | Low-quality     | Genome-fragment | 3.94  | 0 |
| 511_vs_k141_2427          | [full]    | 2363  | NA | 0  | 1              | Not-determined  | Genome-fragment | NA    | 0 |
| 514_extracted_k141_22560  |           | 1197  | NA | 2  | 0              | Low-quality     | Genome-fragment | 3.95  | 0 |
| 514_extracted_k141_3403   |           | 1197  | NA | 1  | 0              | Low-quality     | Genome-fragment | 1.83  | 0 |
| 55_extracted_k141_20260   |           | 1197  | NA | 0  | 0              | Low-quality     | Genome-fragment | 1.56  | 0 |
| 511_vs_k141_21871         | [full]    | 2329  | NA | 0  | 1              | Not-determined  | Genome-fragment | NA    | 0 |
| 57_extracted_8646         |           | 1197  | NA | 1  | 0              | Low-quality     | Genome-fragment | 3.65  | 0 |
| 57_extracted_25302        |           | 1197  | NA | 0  | 0              | Low-quality     | Genome-fragment | 1.87  | 0 |
| 511_vs_k141_93139         | [full]    | 1470  | NA | 0  | 0              | Not-determined  | Genome-fragment | NA    | 0 |
| 57_vs_108610              | [full]    | 1197  | NA | 0  | 1              | Low-quality     | Genome-fragment | 0.69  | 0 |
| 57_vs_118473              | [full]    | 1197  | NA | 1  | 0              | Low-quality     | Genome-fragment | 3.07  | 0 |
| 516_vs_108901             | [full]    | 1197  | NA | 0  | 0              | Low-quality     | Genome-fragment | 0.59  | 0 |
| 511_vs_k141_14882         | [full]    | 38803 | NA | 9  | 0              | Medium-quality  | Genome-fragment | 64.08 | 0 |
| 512_extracted_k141_42999  |           | 1197  | NA | 0  | 1              | Low-quality     | Genome-fragment | 0.49  | 0 |
| 511_vs_k141_24501         | [full]    | 1855  | NA | 0  | 2              | Not-determined  | Genome-fragment | NA    | 0 |
| 511_vs_k141_41107         | [full]    | 37369 | NA | 31 | 0              | Medium-quality  | Genome-fragment | 81.54 | 0 |
| 511_vs_k141_8752          | [full]    | 3137  | NA | 0  | 2              | Not-determined  | Genome-fragment | NA    | 0 |
| 511_vs_k141_41131         | [full]    | 3159  | NA | 0  | 0              | Not-determined  | Genome-fragment | NA    | 0 |
| 511_vs_k141_80399         | [full]    | 1938  | NA | 0  | 0              | Not-determined  | Genome-fragment | NA    | 0 |
| 511_vs_k141_93204         | [full]    | 2320  | NA | 0  | 2              | Not-determined  | Genome-fragment | NA    | 0 |
| 56_vs_k141_45493          | [full]    | 1197  | NA | 0  | 1              | Low-quality     | Genome-fragment | 1.29  | 0 |
| 58_vs_k141_58938          | [full]    | 1197  | NA | 0  | 1              | Low-quality     | Genome-fragment | 1.24  | 0 |
| 58_vs_k141_203715         | [lt2gene] | 1197  | NA | 1  | 0              | Low-quality     | Genome-fragment | 1.75  | 0 |
| 511_vs_k141_47490         | [full]    | 1179  | NA | 0  | 2              | Not-determined  | Genome-fragment | NA    | 0 |
| 517_vs_k141_93394         | [lt2gene] | 1198  | NA | 0  | 0              | Low-quality     | Genome-fragment | 3.23  | 0 |
| 511_vs_k141_80417         | [full]    | 3607  | NA | 0  | 1              | Not-determined  | Genome-fragment | NA    | 0 |
| 59_extracted_k141_36525   |           | 1198  | NA | 0  | 1              | Low-quality     | Genome-fragment | 0.95  | 0 |
| 511_vs_k141_97757         | [full]    | 1198  | NA | 0  | 0              | Low-quality     | Genome-fragment | 0.73  | 0 |
| 511_vs_k141_93269         | [full]    | 1542  | NA | 0  | 0              | Not-determined  | Genome-fragment | NA    | 0 |
| 55_vs_k141_86223          | [full]    | 1198  | NA | 3  | 0              | Low-quality     | Genome-fragment | 2.94  | 0 |
| 511_vs_k141_15052         | [full]    | 1590  | NA | 0  | 2              | Not-determined  | Genome-fragment | NA    | 0 |
| 511_vs_k141_87244         | [full]    | 1549  | NA | 3  | Not-determined | Genome-fragment | NA              | 3.02  | 0 |
| 511_vs_k141_47561         | [full]    | 3902  | NA | 0  | 0              | Not-determined  | Genome-fragment | NA    | 0 |
| 57_extracted_15649        |           | 1198  | NA | 1  | 0              | Low-quality     | Genome-fragment | 2.27  | 0 |
| 511_vs_k141_88841         | [full]    | 4177  | NA | 4  | Not-determined | Genome-fragment | NA              | 2.09  | 0 |
| 516_extracted_131919      |           | 1198  | NA | 0  | 0              | Low-quality     | Genome-fragment | 0.93  | 0 |
| 516_extracted_149231      |           | 1198  | NA | 1  | 0              | Low-quality     | Genome-fragment | 2.03  | 0 |
| 511_vs_k141_60540         | [full]    | 1163  | NA | 0  | 0              | Not-determined  | Genome-fragment | NA    | 0 |
| 516_vs_48369              | [full]    | 1198  | NA | 3  | 0              | Low-quality     | Genome-fragment | 2.28  | 0 |
| 516_vs_68179              | [full]    | 1198  | NA | 1  | 0              | Low-quality     | Genome-fragment | 1.99  | 0 |
| 516_vs_59345              | [lt2gene] | 1198  | NA | 1  | 0              | Low-quality     | Genome-fragment | 0.64  | 0 |
| 511_vs_k141_47052         | [full]    | 1187  | NA | 1  | 1              | Not-determined  | Genome-fragment | NA    | 0 |
| 510_extracted_90086       |           | 1198  | NA | 0  | 0              | Low-quality     | Genome-fragment | 0.9   | 0 |
| 512_extracted_k141_106885 |           | 1198  | NA | 0  | 0              | Low-quality     | Genome-fragment | 1.87  | 0 |
| 512_vs_k141_133484        | [full]    | 1198  | NA | 0  | 0              | Low-quality     | Genome-fragment | 2.09  | 0 |
| 515_vs_4774               | [full]    | 1198  | NA | 1  | 0              | Low-quality     | Genome-fragment | 2.05  | 0 |
| 511_vs_k141_22001         | [full]    | 3752  | NA | 0  | 2              | Not-determined  | Genome-fragment | NA    | 0 |
| 58_vs_k141_72123          | [full]    | 1198  | NA | 1  | 0              | Low-quality     | Genome-fragment | 1.9   | 0 |
| 58_vs_k141_16012          | [full]    | 1198  | NA | 1  | 0              | Low-quality     | Genome-fragment | 2.19  | 0 |
| 511_extracted_k141_95392  |           | 1199  | NA | 1  | 0              | Low-quality     | Genome-fragment | 27.31 | 0 |
| 513_vs_36497              | [full]    | 1199  | NA | 0  | 1              | Low-quality     | Genome-fragment | 2.86  | 0 |
| 51_extracted_k141_30281   |           | 1199  | NA | 0  | 0              | Low-quality     | Genome-fragment | 2.87  | 0 |
| 51_extracted_k141_111936  |           | 1199  | NA | 0  | 0              | Low-quality     | Genome-fragment | 1.33  | 0 |
| 51_vs_k141_61723          | [full]    | 1199  | NA | 0  | 0              | Low-quality     | Genome-fragment | 0.93  | 0 |
| 53_vs_k141_46577          | [lt2gene] | 1199  | NA | 0  | 0              | Low-quality     | Genome-fragment | 3.55  | 0 |
| 51_vs_k141_54639          | [full]    | 1771  | NA | 0  | 3              | Not-determined  | Genome-fragment | NA    | 0 |
| 55_vs_k141_101688         | [full]    | 1199  | NA | 2  | 0              | Low-quality     | Genome-fragment | 3.2   | 0 |
| 57_vs_22199               | [full]    | 1199  | NA | 0  | 0              | Low-quality     | Genome-fragment | 3.02  | 0 |
| 516_extracted_86975       |           | 1199  | NA | 1  | 0              | Low-quality     | Genome-fragment | 1.52  | 0 |
| 511_vs_k141_15209         | [full]    | 2716  | NA | 0  | 0              | Not-determined  | Genome-fragment | NA    | 0 |
| 56_vs_k141_33835          | [full]    | 1199  | NA | 0  | 0              | Low-quality     | Genome-fragment | 2.29  | 0 |
| 58_vs_k141_367435         | [full]    | 1199  | NA | 0  | 1              | Low-quality     | Genome-fragment | 1.48  | 0 |
| 58_vs_k141_181366         | [full]    | 1199  | NA | 0  | 0              | Low-quality     | Genome-fragment | 2.83  | 0 |
| 517_extracted_k141_34567  |           | 1200  | NA | 0  | 0              | Low-quality     | Genome-fragment | 21.71 | 0 |
| 59_extracted_k141_40631   |           | 1200  | NA | 0  | 0              | Low-quality     | Genome-fragment | 2.22  | 0 |
| 511_vs_k141_47673         | [full]    | 1708  | NA | 0  | 2              | Not-determined  | Genome-fragment | NA    | 0 |
| 511_vs_k141_41441         | [full]    | 3712  | NA | 0  | 1              | Not-determined  | Genome-fragment | NA    | 0 |
| 511_vs_k141_30539         | [full]    | 1102  | NA | 0  | 1              | Not-determined  | Genome-fragment | NA    | 0 |
| 511_vs_k141_28479         | [full]    | 1767  | NA | 0  | 0              | Not-determined  | Genome-fragment | NA    | 0 |
| 59_extracted_k141_79492   |           | 1200  | NA | 1  | 0              | Low-quality     | Genome-fragment | 2.69  | 0 |
| 511_vs_k141_27118         | [lt2gene] | 1200  | NA | 0  | 0              | Low-quality     | Genome-fragment | 2.66  | 0 |
| 53_vs_k141_83057          | [full]    | 1200  | NA | 0  | 0              | Low-quality     | Genome-fragment | 2.39  | 0 |
| 511_vs_k141_34539         | [full]    | 1116  | NA | 0  | 0              | Not-determined  | Genome-fragment | NA    | 0 |
| 511_vs_k141_34548         | [full]    | 1053  | NA | 0  | 2              | Not-determined  | Genome-fragment | NA    | 0 |
| 53_vs_k141_86703          | [full]    | 1200  | NA | 0  | 0              | Low-quality     | Genome-fragment | 1.37  | 0 |
| 511_vs_k141_22135         | [full]    | 1131  | NA | 0  | 0              | Not-determined  | Genome-fragment | NA    | 0 |
| 55_vs_k141_11295          | [full]    | 1200  | NA | 1  | 0              | Low-quality     | Genome-fragment | 2.79  | 0 |
| 511_vs_k141_47723         | [full]    | 1412  | NA | 0  | 0              | Not-determined  | Genome-fragment | NA    | 0 |
| 57_extracted_32817        |           | 1200  | NA | 0  | 0              | Low-quality     | Genome-fragment | 2.04  | 0 |
| 57_vs_82705               | [full]    | 1200  | NA | 1  | 0              | Low-quality     | Genome-fragment | 1.8   | 0 |
| 57_vs_117526              | [lt2gene] | 1200  | NA | 0  | 0              | Low-quality     | Genome-fragment | 1.95  | 0 |
| 52_extracted_k141_14342   |           | 1200  | NA | 0  | 0              | Low-quality     | Genome-fragment | 1.05  | 0 |
| 511_vs_k141_67157         | [full]    | 6496  | NA | 0  | 2              | Not-determined  | Genome-fragment | NA    | 0 |
| 56_extracted_k141_27333   |           | 1200  | NA | 2  | 0              | Low-quality     | Genome-fragment | 1.7   | 0 |
| 511_vs_k141_15311         | [full]    | 3279  | NA | 0  | 0              | Not-determined  | Genome-fragment | NA    | 0 |
| 511_vs_k141_87524         | [full]    | 1990  | NA | 0  | 0              | Not-determined  | Genome-fragment | NA    | 0 |
| 511_vs_k141_34610         | [full]    | 3769  | NA | 0  | 0              | Not-determined  | Genome-fragment | NA    | 0 |
| 58_extracted_k141_202276  |           | 1200  | NA | 0  | 0              | Low-quality     | Genome-fragment | 0.2   | 0 |
| 58_extracted_k141_39293   |           | 1200  | NA | 0  | 1              | Low-quality     | Genome-fragment | 0.56  | 0 |
| 58_vs_k141_34708          | [full]    | 1200  | NA | 1  | 0              | Low-quality     | Genome-fragment | 2.79  | 0 |
| 511_vs_k141_15330         | [full]    | 1208  | NA | 1  | 1              | Not-determined  | Genome-fragment | NA    | 0 |
| 511_vs_k141_2839          | [full]    | 3916  | NA | 0  | 1              | Not-determined  | Genome-fragment | NA    | 0 |
| 59_extracted_k141_58746   |           | 1201  | NA | 1  | 0              | Low-quality     | Genome-fragment | 1.8   | 0 |
| 511_vs_k141_87570         | [full]    | 2305  | NA | 0  | 1              | Not-determined  | Genome-fragment | NA    | 0 |
| 511_vs_k141_60766         | [full]    | 2003  | NA | 0  | 0              | Not-determined  | Genome-fragment | NA    | 0 |
| 511_vs_k141_34659         | [full]    | 2829  | NA | 0  | 0              | Not-determined  | Genome-fragment | NA    | 0 |
| 513_extracted_65857       |           | 1201  | NA | 0  | 1              | Low-quality     | Genome-fragment | 1.23  | 0 |
| 511_vs_k141_74430         | [full]    | 2198  | NA | 0  | 0              | Not-determined  | Genome-fragment | NA    | 0 |
| 513_vs_76971              | [full]    | 1201  | NA | 0  | 0              | Low-quality     | Genome-fragment | 2.35  | 0 |
| 511_extracted_k141_37481  |           | 1201  | NA | 0  | 0              | Low-quality     | Genome-fragment | 2.97  | 0 |
| 51_vs_k141_142003         | [full]    | 1201  | NA | 0  | 0              | Low-quality     | Genome-fragment | 2.46  | 0 |
| 51_vs_k141_72705          | [full]    | 1201  | NA | 2  | 0              | Low-quality     | Genome-fragment | 1.97  | 0 |
| 53_vs_k141_59969          | [full]    | 1201  | NA | 0  | 0              | Low-quality     | Genome-fragment | 1.52  | 0 |
| 511_vs_k141_74510         | [full]    | 1419  | NA | 0  | 1              | Not-determined  | Genome-fragment | NA    | 0 |
| 57_extracted_34197        |           | 1201  | NA | 0  | 0              | Low-quality     | Genome-fragment | 0.93  | 0 |
| 511_vs_k141_93671         | [full]    | 4595  | NA | 1  | 4              | Not-determined  | Genome-fragment | NA    | 0 |
| 57_extracted_81790        |           | 1201  | NA | 0  | 0              | Low-quality     | Genome-fragment | 2.62  | 0 |
| 516_vs_52685              | [full]    | 1201  | NA | 0  | 2              | Low-quality     | Genome-fragment | 0.53  | 0 |
| 511_vs_k141_9270          | [full]    | 1662  | NA | 0  | 2              | Not-determined  | Genome-fragment | NA    | 0 |
| 512_extracted_k141_150820 |           | 1201  | NA | 0  | 0              | Low-quality     | Genome-fragment | 2.3   | 0 |
| 511_vs_k141_47674         | [full]    | 3713  | NA | 0  | 0              | Not-determined  | Genome-fragment | NA    | 0 |
| 512_extracted_k141_104477 |           | 1201  | NA | 0  | 0              | Low-quality     | Genome-fragment | 1.56  | 0 |
| 511_vs_k141_60867         | [full]    | 3384  | NA | 0  | 0              | Not-determined  | Genome-fragment | NA    | 0 |
| 58_extracted_k141_150419  |           | 1201  | NA | 0  | 1              | Low-quality     | Genome-fragment | 0.32  | 0 |
| 511_vs_k141_54666         | [full]    | 1050  | NA | 0  | 0              | Not-determined  | Genome-fragment | NA    | 0 |
| 517_vs_k141_110316        | [full]    | 1202  | NA | 0  | 0              | Low-quality     | Genome-fragment | 2.41  | 0 |
| 513_extracted_122252      |           | 1202  | NA | 0  | 0              | Low-quality     | Genome-fragment | 0.67  | 0 |
| 513_extracted_124805      |           | 1202  | NA | 0  | 0              | Low-quality     | Genome-fragment | 1.54  | 0 |
| 513_vs_86639              | [full]    | 1202  | NA | 0  | 0              | Low-quality     | Genome-fragment | 0.89  | 0 |
| 55_extracted_k141_17465   | [full]    | 1202  | NA | 0  | 0              | Low-quality     | Genome-fragment | 1.94  | 0 |
| 55_extracted_k141_38525   |           | 1202  | NA | 0  | 0              | Low-quality     | Genome-fragment | 2.43  | 0 |
| 57_vs_49512               | [full]    | 1202  | NA | 0  | 0              | Low-quality     | Genome-fragment | 1.36  | 0 |
| 511_vs_k141_34729         | [full]    | 2123  | NA | 0  | 1              | Not-determined  | Genome-fragment | NA    | 0 |
| 511_vs_k141_74619         | [full]    | 2587  | NA | 0  | 4              | Not-determined  | Genome-fragment | NA    | 0 |
| 511_vs_k141_54710         | [full]    | 2150  | NA | 0  | 0              | Not-determined  | Genome-fragment | NA    | 0 |
| 516_extracted_150035      |           | 1202  | NA | 4  | 0              | Low-quality     | Genome-fragment | 3.95  | 0 |
| 516_vs_87884              | [full]    | 1202  | NA | 0  | 2              | Low-quality     | Genome-fragment | 2.55  | 0 |
| 510_vs_103901             | [full]    | 1202  | NA | 0  | 0              | Low-quality     | Genome-fragment | 2.91  | 0 |
| 512_vs_k141_184717        | [full]    | 1202  | NA | 0  | 0              | Low-quality     | Genome-fragment | 2.62  | 0 |
| 56_extracted_k141_54222   |           | 1202  | NA | 0  | 0              | Low-quality     | Genome-fragment | 3.27  | 0 |
| 517_vs_k141_109594        | [full]    | 1203  | NA | 0  | 0              | Low-quality     | Genome-fragment | 1.46  | 0 |
| 511_vs_k141_22418         | [full]    | 1030  | NA | 0  | 1              | Not-determined  | Genome-fragment | NA    | 0 |
| 511_vs_k141_22422         | [full]    | 5427  | NA | 0  | 1              | Not-determined  | Genome-fragment | NA    | 0 |
| 59_extracted_k141_74800   |           | 1203  | NA | 0  | 0              | Low-quality     | Genome-fragment | 2.92  | 0 |
| 511_vs_k141_93825         | [full]    | 1865  | NA | 0  | 0              | Not-determined  | Genome-fragment | NA    | 0 |
| 59_vs_k141_34821          | [full]    | 1203  | NA | 1  | 0              | Low-quality     | Genome-fragment | 2.8   | 0 |
| 511_vs_k141_67390         | [full]    | 1584  | NA | 0  | 2              | Not-determined  | Genome-fragment | NA    | 0 |
| 55_vs_k141_16823          | [lt2gene] | 1203  | NA | 0  | 0              | Low-quality     | Genome-fragment | 2.99  | 0 |
| 57_vs_39647               | [full]    | 1203  | NA | 1  | 0              | Low-quality     | Genome-fragment | 2.91  | 0 |
| 57_vs_66305               | [full]    | 1203  | NA | 1  | 0              | Low-quality     | Genome-fragment |       |   |



|                            |       |     |    |       |    |                |                 |                 |       |       |
|----------------------------|-------|-----|----|-------|----|----------------|-----------------|-----------------|-------|-------|
| S11_vs_k141_41934  full    | 2384  | No  | NA | 0     | 0  | Not-determined | Genome-fragment | NA              | 0     | 0     |
| S11_vs_k141_67973  full    | 27945 | No  | NA | 3     | 1  | Medium-quality | Genome-fragment | NA              | 72.1  | 0     |
| S17_vs_k141_132155  full   | 1205  | No  | NA | 0     | 0  | Low-quality    | Genome-fragment | NA              | 1.92  | 0     |
| S9_extracted_k141_75802    | 1205  | No  | NA | 1     | 0  | Low-quality    | Genome-fragment | NA              | 1.72  | 0     |
| S14_extracted_k141_47615   | 1205  | No  | NA | 3     | 0  | Low-quality    | Genome-fragment | NA              | 3.97  | 0     |
| S14_extracted_k141_35945   | 1205  | No  | NA | 2     | 0  | Low-quality    | Genome-fragment | NA              | 3.97  | 0     |
| S7_vs_111176  full         | 1205  | No  | NA | 1     | 0  | Low-quality    | Genome-fragment | NA              | 3.12  | 0     |
| S11_vs_k141_54914  full    | 2054  | No  | NA | 0     | 0  | Not-determined | Genome-fragment | NA              | 2.44  | 0     |
| S16_vs_161606  full        | 1205  | No  | NA | 0     | 0  | Low-quality    | Genome-fragment | NA              | 2.44  | 0     |
| S10_extracted_56940        | 1205  | No  | NA | 0     | 0  | Low-quality    | Genome-fragment | NA              | 1.09  | 0     |
| S11_vs_k141_34954  full    | 3579  | No  | NA | 0     | 3  | Not-determined | Genome-fragment | NA              | 0.97  | 0     |
| S12_extracted_k141_93397   | 1205  | No  | NA | 0     | 0  | Low-quality    | Genome-fragment | NA              | 1.98  | 0     |
| S12_vs_k141_167480  full   | 1205  | No  | NA | 1     | 0  | Low-quality    | Genome-fragment | NA              | 0.97  | 0     |
| S11_vs_k141_34964  full    | 4930  | No  | NA | 0     | 0  | Not-determined | Genome-fragment | NA              | 0.97  | 0     |
| S11_vs_k141_48109  full    | 65738 | Yes | NA | 32360 | 17 | 25             | Medium-quality  | Genome-fragment | 65.76 | 50.77 |
| S12_vs_k141_51885  full    | 1205  | No  | NA | 0     | 0  | Low-quality    | Genome-fragment | NA              | 2.2   | 0     |
| S11_vs_k141_54965  full    | 1661  | No  | NA | 0     | 1  | Not-determined | Genome-fragment | NA              | 2.74  | 0     |
| S2_extracted_k141_7975     | 1205  | No  | NA | 2     | 0  | Low-quality    | Genome-fragment | NA              | 2.74  | 0     |
| S11_vs_k141_2377  full     | 2721  | Yes | NA | 29695 | 7  | 5              | Medium-quality  | Genome-fragment | 69.23 | 20.24 |
| S8_vs_k141_72217  full     | 1205  | No  | NA | 1     | 0  | Low-quality    | Genome-fragment | NA              | 2.33  | 0     |
| S8_vs_k141_103742  full    | 1205  | No  | NA | 0     | 0  | Low-quality    | Genome-fragment | NA              | 2.04  | 0     |
| S11_vs_k141_3292  full     | 3162  | No  | NA | 0     | 3  | Not-determined | Genome-fragment | NA              | 2.9   | 0     |
| S17_extracted_k141_76287   | 1206  | No  | NA | 1     | 0  | Low-quality    | Genome-fragment | NA              | 0.67  | 0     |
| S17_extracted_k141_55556   | 1206  | No  | NA | 0     | 1  | Low-quality    | Genome-fragment | NA              | 1.28  | 0     |
| S11_vs_k141_81101  full    | 4926  | No  | NA | 0     | 2  | Not-determined | Genome-fragment | NA              | 0.34  | 0     |
| S9_vs_k141_58556  full     | 1206  | No  | NA | 0     | 1  | Low-quality    | Genome-fragment | NA              | 0.75  | 0     |
| S14_extracted_k141_65722   | 1206  | No  | NA | 0     | 0  | Not-determined | Genome-fragment | NA              | 3.14  | 0     |
| S11_vs_k141_55019  full    | 5611  | No  | NA | 0     | 0  | Not-determined | Genome-fragment | NA              | 0.29  | 0     |
| S11_vs_k141_140529  full   | 1206  | No  | NA | 0     | 0  | Low-quality    | Genome-fragment | NA              | 2.6   | 0     |
| S11_vs_k141_67662  full    | 2458  | No  | NA | 0     | 1  | Not-determined | Genome-fragment | NA              | 2.82  | 0     |
| S3_vs_k141_122779  full    | 1206  | No  | NA | 0     | 0  | Low-quality    | Genome-fragment | NA              | 0.34  | 73.55 |
| S11_vs_k141_42031  full    | 1719  | No  | NA | 0     | 1  | Not-determined | Genome-fragment | NA              | 1.86  | 0     |
| S5_vs_k141_38520  full     | 1206  | No  | NA | 0     | 0  | Low-quality    | Genome-fragment | NA              | 3.18  | 0     |
| S10_extracted_71855        | 1206  | No  | NA | 0     | 1  | Low-quality    | Genome-fragment | NA              | 3.51  | 0     |
| S10_extracted_118980       | 1206  | No  | NA | 0     | 0  | Low-quality    | Genome-fragment | NA              | 0.29  | 0     |
| S11_vs_k141_48187  full    | 2683  | No  | NA | 0     | 2  | Not-determined | Genome-fragment | NA              | 2.6   | 0     |
| S4_extracted_31423         | 1206  | No  | NA | 1     | 0  | Low-quality    | Genome-fragment | NA              | 2.82  | 0     |
| S8_extracted_k141_112826   | 1206  | Yes | NA | 319   | 1  | 1              | Low-quality     | Genome-fragment | 0.34  | 73.55 |
| S9_vs_k141_65412  full     | 1207  | No  | NA | 0     | 0  | Low-quality    | Genome-fragment | NA              | 2.52  | 0     |
| S14_vs_k141_48569  full    | 1207  | No  | NA | 1     | 0  | Low-quality    | Genome-fragment | NA              | 1.86  | 0     |
| S14_vs_k141_78858  full    | 1207  | No  | NA | 0     | 0  | Low-quality    | Genome-fragment | NA              | 3.18  | 0     |
| S5_extracted_k141_90723    | 1207  | No  | NA | 0     | 0  | Low-quality    | Genome-fragment | NA              | 3.51  | 0     |
| S11_vs_k141_9725  full     | 11703 | No  | NA | 0     | 6  | Not-determined | Genome-fragment | NA              | 0     | 0     |
| S11_vs_k141_100710  full   | 8113  | No  | NA | 0     | 4  | Not-determined | Genome-fragment | NA              | 0     | 0     |
| S11_vs_k141_22912  full    | 2086  | No  | NA | 0     | 1  | Not-determined | Genome-fragment | NA              | 2.68  | 0     |
| S7_extracted_123646        | 1207  | No  | NA | 0     | 0  | Low-quality    | Genome-fragment | NA              | 0     | 0     |
| S11_vs_k141_42137  full    | 4849  | No  | NA | 0     | 3  | Not-determined | Genome-fragment | NA              | 1.48  | 0     |
| S11_vs_k141_15985  full    | 2236  | No  | NA | 0     | 1  | Not-determined | Genome-fragment | NA              | 0.81  | 0     |
| S16_extracted_109158       | 1207  | No  | NA | 0     | 1  | Low-quality    | Genome-fragment | NA              | 2.87  | 0     |
| S16_vs_3734  full          | 1207  | No  | NA | 1     | 0  | Low-quality    | Genome-fragment | NA              | 3.51  | 0     |
| S12_vs_k141_16234  full    | 1207  | No  | NA | 1     | 0  | Low-quality    | Genome-fragment | NA              | 1.92  | 0     |
| S6_vs_k141_18467  full     | 1207  | No  | NA | 0     | 0  | Low-quality    | Genome-fragment | NA              | 1.79  | 0     |
| S8_extracted_k141_61698    | 1207  | No  | NA | 1     | 0  | Low-quality    | Genome-fragment | NA              | 1.92  | 0     |
| S8_vs_k141_5222  full      | 1207  | No  | NA | 0     | 2  | Not-determined | Genome-fragment | NA              | 99.69 | 0     |
| S11_vs_k141_16017  full    | 1845  | No  | NA | 25    | 0  | High-quality   | Genome-fragment | NA              | 0     | 0     |
| S11_vs_k141_55144  full    | 39745 | No  | NA | 0     | 2  | Not-determined | Genome-fragment | NA              | 0     | 0     |
| S11_vs_k141_28962  full    | 2589  | No  | NA | 0     | 0  | Not-determined | Genome-fragment | NA              | 0     | 0     |
| S11_vs_k141_61383  full    | 1757  | No  | NA | 0     | 0  | Not-determined | Genome-fragment | NA              | 0     | 0     |
| S11_vs_k141_3377  full     | 1976  | No  | NA | 0     | 1  | Not-determined | Genome-fragment | NA              | 1.16  | 0     |
| S11_vs_k141_16034  full    | 2220  | No  | NA | 0     | 0  | Not-determined | Genome-fragment | NA              | 0     | 0     |
| S17_extracted_k141_165749  | 1208  | No  | NA | 0     | 0  | Low-quality    | Genome-fragment | NA              | 1.17  | 0     |
| S11_vs_k141_48312  full    | 2966  | No  | NA | 0     | 2  | Not-determined | Genome-fragment | NA              | 3.47  | 0     |
| S11_vs_k141_81150  full    | 7979  | No  | NA | 0     | 0  | Not-determined | Genome-fragment | NA              | 0     | 0     |
| S9_extracted_k141_8890     | 1208  | No  | NA | 1     | 0  | Low-quality    | Genome-fragment | NA              | 0.23  | 0     |
| S14_vs_k141_77836  full    | 1208  | No  | NA | 0     | 0  | Low-quality    | Genome-fragment | NA              | 2.56  | 0     |
| S11_vs_k141_48339  full    | 2997  | No  | NA | 0     | 1  | Not-determined | Genome-fragment | NA              | 2.93  | 0     |
| S11_extracted_k141_47787   | 1208  | No  | NA | 0     | 0  | Low-quality    | Genome-fragment | NA              | 2.18  | 0     |
| S14_vs_k141_50966  l22gene | 1208  | No  | NA | 1     | 0  | Low-quality    | Genome-fragment | NA              | 0     | 0     |
| S11_vs_k141_81185  full    | 1255  | No  | NA | 0     | 0  | Not-determined | Genome-fragment | NA              | 0     | 0     |
| S7_vs_62483  full          | 1208  | No  | NA | 1     | 0  | Low-quality    | Genome-fragment | NA              | 0     | 0     |
| S16_extracted_35469        | 1208  | No  | NA | 1     | 0  | Low-quality    | Genome-fragment | NA              | 0     | 0     |
| S11_vs_k141_3444  full     | 1493  | No  | NA | 0     | 0  | Not-determined | Genome-fragment | NA              | 0     | 0     |
| S11_vs_k141_81192  full    | 7035  | No  | NA | 0     | 1  | Not-determined | Genome-fragment | NA              | 0     | 0     |
| S11_vs_k141_29066  full    | 2269  | No  | NA | 0     | 2  | Not-determined | Genome-fragment | NA              | 2.35  | 0     |
| S16_vs_116486  full        | 1208  | No  | NA | 0     | 1  | Low-quality    | Genome-fragment | NA              | 2.88  | 0     |
| S10_extracted_67002        | 1208  | No  | NA | 0     | 0  | Low-quality    | Genome-fragment | NA              | 3.01  | 0     |
| S12_extracted_k141_138258  | 1208  | No  | NA | 1     | 0  | Low-quality    | Genome-fragment | NA              | 1.76  | 0     |
| S11_vs_k141_29080  full    | 4324  | No  | NA | 0     | 4  | Not-determined | Genome-fragment | NA              | 1.46  | 0     |
| S2_vs_k141_13461  full     | 1208  | No  | NA | 0     | 0  | Low-quality    | Genome-fragment | NA              | 1.34  | 0     |
| S8_vs_k141_2776  full      | 1208  | No  | NA | 1     | 0  | Low-quality    | Genome-fragment | NA              | 3.33  | 0     |
| S17_vs_k141_12513  full    | 1209  | No  | NA | 0     | 1  | Low-quality    | Genome-fragment | NA              | 0.88  | 0     |
| S11_vs_k141_3484  full     | 1658  | No  | NA | 0     | 3  | Not-determined | Genome-fragment | NA              | 0     | 0     |
| S14_vs_k141_111915  full   | 1209  | No  | NA | 0     | 0  | Low-quality    | Genome-fragment | NA              | 0     | 0     |
| S11_vs_k141_100886  full   | 2998  | No  | NA | 0     | 1  | Not-determined | Genome-fragment | NA              | 2.84  | 0     |
| S12_vs_k141_55246  full    | 1209  | No  | NA | 0     | 1  | Not-determined | Genome-fragment | NA              | 0.88  | 0     |
| S14_vs_k141_107471  full   | 1209  | No  | NA | 1     | 0  | Low-quality    | Genome-fragment | NA              | 0     | 0     |
| S11_extracted_k141_69012   | 1209  | No  | NA | 0     | 2  | Low-quality    | Genome-fragment | NA              | 0     | 0     |
| S11_vs_k141_100894  full   | 1819  | No  | NA | 0     | 0  | Not-determined | Genome-fragment | NA              | 0     | 0     |
| S11_vs_k141_87988  full    | 1530  | No  | NA | 0     | 0  | Not-determined | Genome-fragment | NA              | 0.67  | 0     |
| S11_vs_k141_67858  full    | 3259  | No  | NA | 0     | 2  | Not-determined | Genome-fragment | NA              | 2.65  | 0     |
| S11_vs_k141_23153  full    | 1492  | No  | NA | 0     | 0  | Not-determined | Genome-fragment | NA              | 0     | 0     |
| S1_extracted_k141_42763    | 1209  | No  | NA | 0     | 1  | Low-quality    | Genome-fragment | NA              | 0     | 0     |
| S5_vs_k141_78070  full     | 1209  | No  | NA | 3     | 0  | Low-quality    | Genome-fragment | NA              | 0.7   | 0     |
| S11_vs_k141_61510  full    | 2350  | No  | NA | 0     | 1  | Not-determined | Genome-fragment | NA              | 1.96  | 0     |
| S16_vs_30111  full         | 1209  | No  | NA | 0     | 0  | Low-quality    | Genome-fragment | NA              | 1.36  | 0     |
| S17_extracted_k141_4554    | 1210  | No  | NA | 0     | 0  | Low-quality    | Genome-fragment | NA              | 2.6   | 0     |
| S17_vs_k141_72261  l22gene | 1210  | No  | NA | 1     | 0  | Low-quality    | Genome-fragment | NA              | 2.09  | 0     |
| S11_vs_k141_30436  full    | 1210  | No  | NA | 0     | 0  | Low-quality    | Genome-fragment | NA              | 1.23  | 0     |
| S11_vs_k141_75241  full    | 1073  | No  | NA | 0     | 0  | Not-determined | Genome-fragment | NA              | 2.64  | 0     |
| S13_vs_19701  full         | 1210  | No  | NA | 0     | 1  | Low-quality    | Genome-fragment | NA              | 1.95  | 0     |
| S11_extracted_k141_103466  | 1210  | No  | NA | 1     | 0  | Low-quality    | Genome-fragment | NA              | 2.63  | 0     |
| S11_vs_k141_61540  full    | 1819  | No  | NA | 0     | 1  | Not-determined | Genome-fragment | NA              | 2.66  | 0     |
| S3_vs_k141_60629  full     | 1210  | No  | NA | 1     | 0  | Low-quality    | Genome-fragment | NA              | 60.13 | 0     |
| S11_vs_k141_55331  full    | 2157  | No  | NA | 0     | 2  | Not-determined | Genome-fragment | NA              | 0.98  | 0     |
| S11_vs_k141_61541  full    | 5499  | No  | NA | 0     | 2  | Not-determined | Genome-fragment | NA              | 0.45  | 0     |
| S5_vs_k141_55446  full     | 1210  | No  | NA | 1     | 0  | Low-quality    | Genome-fragment | NA              | 1.98  | 0     |
| S11_vs_k141_61552  full    | 1071  | No  | NA | 0     | 1  | Not-determined | Genome-fragment | NA              | 1.52  | 0     |
| S5_vs_k141_55117  l22gene  | 1210  | No  | NA | 1     | 0  | Low-quality    | Genome-fragment | NA              | 3.27  | 0     |
| S7_vs_211807  full         | 1210  | No  | NA | 0     | 0  | Low-quality    | Genome-fragment | NA              | 4.05  | 0     |
| S11_vs_k141_81327  full    | 3131  | No  | NA | 0     | 1  | Not-determined | Genome-fragment | NA              | 1.05  | 0     |
| S11_vs_k141_23188  full    | 35761 | No  | NA | 12    | 3  | Medium-quality | Genome-fragment | NA              | 0     | 0     |
| S11_vs_k141_94430  full    | 1372  | No  | NA | 0     | 0  | Not-determined | Genome-fragment | NA              | 0     | 0     |
| S11_vs_k141_29249  full    | 1306  | No  | NA | 0     | 0  | Not-determined | Genome-fragment | NA              | 2.77  | 0     |
| S7_vs_27795  full          | 1210  | No  | NA | 0     | 0  | Low-quality    | Genome-fragment | NA              | 2.43  | 0     |
| S7_vs_102993  full         | 1210  | No  | NA | 0     | 0  | Low-quality    | Genome-fragment | NA              | 0     | 0     |
| S11_vs_k141_88095  full    | 2792  | No  | NA | 1     | 2  | Not-determined | Genome-fragment | NA              | 0     | 0     |
| S11_vs_k141_88097  full    | 1063  | No  | NA | 0     | 1  | Not-determined | Genome-fragment | NA              | 2.83  | 0     |
| S16_extracted_104099       | 1210  | No  | NA | 0     | 0  | Low-quality    | Genome-fragment | NA              | 2.38  | 0     |
| S16_vs_45027  full         | 1210  | No  | NA | 0     | 1  | Not-determined | Genome-fragment | NA              | 2.41  | 0     |
| S11_vs_k141_35575  full    | 5637  | No  | NA | 0     | 0  | Low-quality    | Genome-fragment | NA              | 1.9   | 0     |
| S10_vs_28988  full         | 1210  | No  | NA | 1     | 0  | Low-quality    | Genome-fragment | NA              | 3.4   | 0     |
| S12_extracted_k141_40516   | 1210  | No  | NA | 0     | 0  | Low-quality    | Genome-fragment | NA              | 2.51  | 0     |
| S11_vs_k141_10103  full    | 1419  | No  | NA | 0     | 0  | Not-determined | Genome-fragment | NA              | 0.7   | 0     |
| S12_vs_k141_112154  full   | 1210  | No  | NA | 0     | 0  | Low-quality    | Genome-fragment | NA              | 2.57  | 0     |
| S12_vs_k141_112170  full   | 1210  | No  | NA | 0     | 0  | Low-quality    | Genome-fragment | NA              | 2.84  | 0     |
| S15_extracted_19045        | 1210  | No  | NA | 0     | 0  | Low-quality    | Genome-fragment | NA              | 2.68  | 0     |
| S11_vs_k141_61652  full    | 3331  | No  | NA | 0     | 3  | Not-determined | Genome-fragment | NA              | 0.98  | 0     |
| S8_extracted_k141_161671   | 1210  | No  | NA | 0     | 0  | Low-quality    | Genome-fragment | NA              | 0.45  | 0     |
| S8_vs_k141_116185  full    | 1210  | No  | NA | 1     | 0  | Low-quality    | Genome-fragment | NA              | 1.98  | 0     |
| S8_vs_k141_134442  full    | 1210  | No  | NA | 0     | 0  | Low-quality    | Genome-fragment | NA              | 1.52  | 0     |
| S11_vs_k141_68056  full    | 4842  | No  | NA | 0     | 1  | Not-determined | Genome-fragment | NA              | 0.98  | 0     |
| S8_vs_k141_190236  full    | 1210  | No  | NA | 0     | 1  | Low-quality    | Genome-fragment | NA              | 0.45  | 0     |
| S13_vs_12876  full         | 1211  | No  | NA | 0     | 2  | Low-quality    | Genome-fragment |                 |       |       |



|                           |       |     |    |       |    |                |                 |                 |       |       |
|---------------------------|-------|-----|----|-------|----|----------------|-----------------|-----------------|-------|-------|
| S11_vx_k141_55768  full   | 2974  | No  | NA | 0     | 3  | Not-determined | Genome-fragment | NA              | 0     | 0     |
| S11_vx_k141_54668  full   | 4952  | No  | NA | 0     | 3  | Not-determined | Genome-fragment | NA              | 0     | 0     |
| S11_vx_k141_68151  full   | 6398  | No  | NA | 32    | 1  | High-quality   | High-quality    | 100             | 0     | 0     |
| S10_vx_116625  full       | 1212  | No  | NA | 0     | 2  | Low-quality    | Genome-fragment | 0.83            | 0     | 0     |
| S11_vx_k141_33952  full   | 1840  | No  | NA | 0     | 0  | Not-determined | Genome-fragment | NA              | 0     | 0     |
| S10_vx_36362  H2gene      | 1212  | No  | NA | 1     | 0  | Low-quality    | Genome-fragment | 3.11            | 0     | 0     |
| S12_vx_k141_183141  full  | 1212  | No  | NA | 1     | 0  | Low-quality    | Genome-fragment | 0.82            | 0     | 0     |
| S15_vx_11321  full        | 1212  | No  | NA | 0     | 0  | Low-quality    | Genome-fragment | 2.7             | 0     | 0     |
| S6_vx_k141_7563  full     | 1212  | No  | NA | 0     | 0  | Low-quality    | Genome-fragment | 2.73            | 0     | 0     |
| S11_vx_k141_101401  full  | 1526  | No  | NA | 0     | 0  | Not-determined | Genome-fragment | NA              | 0     | 0     |
| S8_vx_k141_101777  H2gene | 1212  | No  | NA | 0     | 0  | Low-quality    | Genome-fragment | 2.01            | 0     | 0     |
| S17_extracted_k141_86508  | 1213  | No  | NA | 1     | 0  | Low-quality    | Genome-fragment | 4               | 0     | 0     |
| S13_extracted_27511       | 1213  | No  | NA | 2     | 0  | Low-quality    | Genome-fragment | 2.05            | 0     | 0     |
| S11_vx_k141_3771  full    | 1729  | No  | NA | 0     | 0  | Not-determined | Genome-fragment | NA              | 0     | 0     |
| S11_vx_k141_94925  full   | 2984  | No  | NA | 0     | 3  | Not-determined | Genome-fragment | NA              | 0     | 0     |
| S14_vx_k141_101331  full  | 1213  | No  | NA | 0     | 1  | Low-quality    | Genome-fragment | 3.04            | 0     | 0     |
| S1_vx_k141_33401  full    | 1213  | No  | NA | 1     | 0  | Low-quality    | Genome-fragment | 2.41            | 0     | 0     |
| S5_extracted_k141_84257   | 1213  | No  | NA | 0     | 0  | Low-quality    | Genome-fragment | 1.64            | 0     | 0     |
| S7_vx_5511  full          | 1213  | No  | NA | 0     | 0  | Low-quality    | Genome-fragment | 2.94            | 0     | 0     |
| S7_vx_68390  full         | 1213  | No  | NA | 0     | 0  | Low-quality    | Genome-fragment | 2.43            | 0     | 0     |
| S11_vx_k141_55875  full   | 2427  | No  | NA | 0     | 2  | Not-determined | Genome-fragment | NA              | 2.31  | 0     |
| S7_vx_105602  H2gene      | 1213  | No  | NA | 0     | 0  | Low-quality    | Genome-fragment | 2.54            | 0     | 0     |
| S16_vx_97470  full        | 1213  | No  | NA | 1     | 0  | Low-quality    | Genome-fragment | 2.41            | 0     | 0     |
| S16_vx_152168  full       | 1213  | No  | NA | 2     | 0  | Low-quality    | Genome-fragment | 3.39            | 0     | 0     |
| S11_vx_k141_101466  full  | 1212  | No  | NA | 0     | 0  | Not-determined | Genome-fragment | NA              | 0     | 0     |
| S11_vx_k141_29528  full   | 1614  | No  | NA | 0     | 1  | Not-determined | Genome-fragment | NA              | 0     | 0     |
| S10_vx_7558  full         | 1213  | No  | NA | 1     | 0  | Low-quality    | Genome-fragment | 2.83            | 0     | 0     |
| S11_vx_k141_36043  full   | 1901  | No  | NA | 0     | 0  | Not-determined | Genome-fragment | NA              | 0     | 0     |
| S10_vx_21861  full        | 1213  | No  | NA | 0     | 0  | Low-quality    | Genome-fragment | 1.16            | 0     | 0     |
| S10_vx_44453  full        | 1213  | No  | NA | 2     | 0  | Low-quality    | Genome-fragment | 2.97            | 0     | 0     |
| S11_vx_k141_101501  full  | 3316  | No  | NA | 0     | 1  | Not-determined | Genome-fragment | NA              | 0     | 0     |
| S12_vx_k141_58472  full   | 1213  | No  | NA | 0     | 0  | Low-quality    | Genome-fragment | 2.43            | 0     | 0     |
| S11_vx_k141_101525  full  | 1051  | No  | NA | 0     | 1  | Not-determined | Genome-fragment | NA              | 0     | 0     |
| S6_vx_k141_24983  full    | 1213  | No  | NA | 0     | 1  | Low-quality    | Genome-fragment | 0.24            | 0     | 0     |
| S8_extracted_k141_61520   | 1213  | No  | NA | 3     | 0  | Low-quality    | Genome-fragment | 3.91            | 0     | 0     |
| S17_vx_k141_175888  full  | 1214  | No  | NA | 0     | 1  | Low-quality    | Genome-fragment | 3.41            | 0     | 0     |
| S9_vx_k141_60276  full    | 1214  | No  | NA | 0     | 2  | Low-quality    | Genome-fragment | 1.03            | 0     | 0     |
| S11_extracted_k141_101587 | 1214  | No  | NA | 0     | 1  | Low-quality    | Genome-fragment | 0.61            | 0     | 0     |
| S11_vx_k141_75850  full   | 1254  | No  | NA | 0     | 1  | Not-determined | Genome-fragment | NA              | 0     | 0     |
| S11_vx_k141_8098  full    | 1214  | No  | NA | 1     | 0  | Low-quality    | Genome-fragment | 3.05            | 0     | 0     |
| S11_vx_k141_3836  full    | 3311  | No  | NA | 0     | 1  | Not-determined | Genome-fragment | NA              | 0     | 0     |
| S11_vx_k141_62127  full   | 1932  | No  | NA | 0     | 1  | Not-determined | Genome-fragment | NA              | 0     | 0     |
| S11_vx_k141_48807  full   | 1214  | No  | NA | 1     | 0  | Low-quality    | Genome-fragment | 3.04            | 0     | 0     |
| S11_vx_k141_36105  full   | 1840  | No  | NA | 0     | 0  | Not-determined | Genome-fragment | NA              | 0     | 0     |
| S13_extracted_91847       | 1214  | No  | NA | 1     | 0  | Low-quality    | Genome-fragment | 2.89            | 0     | 0     |
| S11_vx_k141_42921  full   | 4413  | No  | NA | 2     | 0  | Not-determined | Genome-fragment | NA              | 0     | 0     |
| S11_vx_k141_56002  full   | 1297  | No  | NA | 0     | 0  | Not-determined | Genome-fragment | NA              | 0     | 0     |
| S11_vx_k141_16667  full   | 2976  | No  | NA | 0     | 0  | Not-determined | Genome-fragment | NA              | 0     | 0     |
| S13_vx_57189  full        | 1214  | No  | NA | 0     | 1  | Low-quality    | Genome-fragment | 0.39            | 0     | 0     |
| S11_vx_k141_88633  full   | 1875  | No  | NA | 0     | 1  | Not-determined | Genome-fragment | NA              | 0     | 0     |
| S11_vx_k141_56021  full   | 1243  | No  | NA | 0     | 1  | Not-determined | Genome-fragment | NA              | 0     | 0     |
| S13_vx_65421  full        | 1214  | No  | NA | 0     | 0  | Low-quality    | Genome-fragment | 2.33            | 0     | 0     |
| S13_vx_76182  full        | 1214  | No  | NA | 0     | 0  | Low-quality    | Genome-fragment | 1.47            | 0     | 0     |
| S1_vx_k141_64238  full    | 1214  | No  | NA | 1     | 0  | Low-quality    | Genome-fragment | 21.96           | 0     | 0     |
| S11_vx_k141_88667  full   | 1708  | No  | NA | 1     | 1  | Not-determined | Genome-fragment | NA              | 2.92  | 0     |
| S5_vx_k141_30472  full    | 1214  | No  | NA | 2     | 0  | Low-quality    | Genome-fragment | 2.92            | 0     | 0     |
| S7_extracted_122436       | 1214  | No  | NA | 0     | 3  | Low-quality    | Genome-fragment | 0.32            | 0     | 0     |
| S7_vx_58149  full         | 1214  | No  | NA | 1     | 0  | Low-quality    | Genome-fragment | 0.95            | 0     | 0     |
| S11_vx_k141_3914  full    | 1311  | No  | NA | 0     | 1  | Not-determined | Genome-fragment | NA              | 0     | 0     |
| S11_vx_k141_48936  full   | 1139  | No  | NA | 0     | 1  | Not-determined | Genome-fragment | NA              | 0     | 0     |
| S11_vx_k141_88692  full   | 4608  | No  | NA | 0     | 4  | Not-determined | Genome-fragment | NA              | 0     | 0     |
| S11_vx_k141_81775  full   | 36215 | No  | NA | 17    | 2  | High-quality   | High-quality    | 93              | 0     | 0     |
| S7_vx_87422  full         | 1214  | No  | NA | 2     | 0  | Low-quality    | Genome-fragment | 2.64            | 0     | 0     |
| S11_vx_k141_3934  full    | 4465  | No  | NA | 0     | 0  | Not-determined | Genome-fragment | NA              | 0     | 0     |
| S11_vx_k141_68348  full   | 41562 | No  | NA | 24    | 2  | High-quality   | High-quality    | 100             | 0     | 0     |
| S11_vx_k141_42927  full   | 56290 | Yes | NA | 48437 | 23 | 6              | Medium-quality  | Genome-fragment | 87.04 | 13.95 |
| S11_vx_k141_23724  full   | 1307  | No  | NA | 0     | 1  | Not-determined | Genome-fragment | NA              | 0     | 0     |
| S11_vx_k141_68355  full   | 3816  | No  | NA | 0     | 0  | Not-determined | Genome-fragment | NA              | 0     | 0     |
| S7_vx_84461  full         | 1214  | No  | NA | 0     | 0  | Low-quality    | Genome-fragment | 2.58            | 0     | 0     |
| S16_extracted_20791       | 1214  | No  | NA | 1     | 0  | Low-quality    | Genome-fragment | 0.74            | 0     | 0     |
| S11_vx_k141_42950  full   | 3259  | No  | NA | 0     | 0  | Not-determined | Genome-fragment | NA              | 0     | 0     |
| S11_vx_k141_42953  full   | 4654  | No  | NA | 0     | 2  | Not-determined | Genome-fragment | NA              | 0     | 0     |
| S16_extracted_129151      | 1214  | No  | NA | 0     | 0  | Low-quality    | Genome-fragment | 2.46            | 0     | 0     |
| S10_extracted_86686       | 1214  | No  | NA | 1     | 0  | Low-quality    | Genome-fragment | 0.64            | 0     | 0     |
| S12_extracted_k141_1337   | 1214  | No  | NA | 0     | 0  | Low-quality    | Genome-fragment | 2.59            | 0     | 0     |
| S15_vx_68187  H2gene      | 1214  | No  | NA | 1     | 0  | Low-quality    | Genome-fragment | 1.98            | 0     | 0     |
| S11_vx_k141_49002  full   | 1761  | No  | NA | 0     | 1  | Not-determined | Genome-fragment | NA              | 0     | 0     |
| S11_vx_k141_62260  full   | 1272  | No  | NA | 0     | 1  | Not-determined | Genome-fragment | NA              | 0     | 0     |
| S8_extracted_k141_21257   | 1214  | No  | NA | 0     | 0  | Low-quality    | Genome-fragment | 1.54            | 0     | 0     |
| S11_vx_k141_62262  full   | 1091  | No  | NA | 0     | 0  | Not-determined | Genome-fragment | NA              | 0     | 0     |
| S8_vx_k141_74976  full    | 1214  | No  | NA | 0     | 2  | Low-quality    | Genome-fragment | 1.03            | 0     | 0     |
| S11_extracted_k141_80965  | 1215  | No  | NA | 0     | 1  | Low-quality    | Genome-fragment | 2.86            | 0     | 0     |
| S14_vx_k141_60258  full   | 1215  | No  | NA | 0     | 0  | Low-quality    | Genome-fragment | 0.8             | 0     | 0     |
| S14_vx_k141_27046  full   | 1215  | No  | NA | 3     | 0  | Low-quality    | Genome-fragment | 2.18            | 0     | 0     |
| S3_extracted_k141_80808   | 1215  | No  | NA | 0     | 1  | Low-quality    | Genome-fragment | 0.87            | 0     | 0     |
| S3_extracted_k141_94477   | 1215  | No  | NA | 0     | 1  | Low-quality    | Genome-fragment | 0.3             | 0     | 0     |
| S11_vx_k141_68455  full   | 1021  | No  | NA | 0     | 2  | Not-determined | Genome-fragment | NA              | 0     | 0     |
| S5_vx_k141_55022  full    | 1215  | No  | NA | 0     | 0  | Low-quality    | Genome-fragment | 2.15            | 0     | 0     |
| S5_vx_k141_57391  full    | 1215  | No  | NA | 0     | 1  | Low-quality    | Genome-fragment | 0.51            | 0     | 0     |
| S7_vx_107802  H2gene      | 1215  | No  | NA | 1     | 0  | Low-quality    | Genome-fragment | 2.6             | 0     | 0     |
| S10_vx_39694  full        | 1215  | No  | NA | 0     | 0  | Low-quality    | Genome-fragment | 2.66            | 0     | 0     |
| S12_vx_k141_25214  full   | 1215  | No  | NA | 0     | 0  | Low-quality    | Genome-fragment | 2.89            | 0     | 0     |
| S12_vx_k141_11139  full   | 1215  | No  | NA | 0     | 0  | Low-quality    | Genome-fragment | 2.53            | 0     | 0     |
| S11_vx_k141_36288  full   | 1104  | No  | NA | 0     | 1  | Not-determined | Genome-fragment | NA              | 0     | 0     |
| S4_extracted_7510         | 1215  | No  | NA | 0     | 0  | Low-quality    | Genome-fragment | 2.22            | 0     | 0     |
| S11_vx_k141_56210  full   | 5955  | No  | NA | 0     | 2  | Not-determined | Genome-fragment | NA              | 0     | 0     |
| S11_vx_k141_4040  full    | 1593  | No  | NA | 0     | 0  | Not-determined | Genome-fragment | NA              | 0     | 0     |
| S6_extracted_k141_17562   | 1215  | No  | NA | 0     | 0  | Low-quality    | Genome-fragment | 0.85            | 0     | 0     |
| S8_extracted_k141_162271  | 1215  | No  | NA | 0     | 0  | Low-quality    | Genome-fragment | 0.74            | 0     | 0     |
| S11_vx_k141_23923  full   | 1314  | No  | NA | 0     | 1  | Not-determined | Genome-fragment | NA              | 0     | 0     |
| S11_vx_k141_23924  full   | 4713  | No  | NA | 0     | 2  | Not-determined | Genome-fragment | NA              | 0     | 0     |
| S11_vx_k141_62365  full   | 2238  | No  | NA | 0     | 2  | Not-determined | Genome-fragment | NA              | 0     | 0     |
| S11_vx_k141_81966  full   | 1403  | No  | NA | 0     | 1  | Not-determined | Genome-fragment | NA              | 0     | 0     |
| S8_extracted_k141_76440   | 1215  | No  | NA | 0     | 0  | Low-quality    | Genome-fragment | 1.42            | 0     | 0     |
| S9_vx_k141_3652  H2gene   | 1216  | No  | NA | 0     | 0  | Low-quality    | Genome-fragment | 2.22            | 0     | 0     |
| S11_extracted_k141_23760  | 1216  | No  | NA | 0     | 0  | Low-quality    | Genome-fragment | 1.96            | 0     | 0     |
| S11_vx_k141_29683  full   | 2642  | No  | NA | 0     | 2  | Not-determined | Genome-fragment | NA              | 0     | 0     |
| S11_vx_k141_23943  full   | 1978  | No  | NA | 0     | 0  | Not-determined | Genome-fragment | NA              | 0     | 0     |
| S11_vx_k141_4104  full    | 11761 | No  | NA | 0     | 1  | Not-determined | Genome-fragment | NA              | 0     | 0     |
| S11_extracted_k141_9364   | 1216  | No  | NA | 1     | 0  | Low-quality    | Genome-fragment | 0.6             | 0     | 0     |
| S1_vx_k141_8361  full     | 1216  | No  | NA | 0     | 0  | Low-quality    | Genome-fragment | 3.05            | 0     | 0     |
| S5_vx_k141_78890  full    | 1216  | No  | NA | 0     | 0  | Low-quality    | Genome-fragment | 2.77            | 0     | 0     |
| S7_extracted_4228         | 1216  | No  | NA | 0     | 0  | Low-quality    | Genome-fragment | 0.77            | 0     | 0     |
| S7_vx_19896  full         | 1216  | No  | NA | 1     | 0  | Low-quality    | Genome-fragment | 3               | 0     | 0     |
| S11_vx_k141_10623  full   | 2376  | No  | NA | 1     | 2  | Not-determined | Genome-fragment | NA              | 6     | 0     |
| S16_vx_11222  full        | 1216  | Yes | NA | 682   | 1  | Low-quality    | Genome-fragment | 1.4             | 43.91 | 0     |
| S16_vx_102206  full       | 1216  | No  | NA | 0     | 0  | Low-quality    | Genome-fragment | 1.34            | 0     | 0     |
| S11_vx_k141_49082  full   | 2753  | No  | NA | 0     | 1  | Not-determined | Genome-fragment | NA              | 0     | 0     |
| S16_vx_30509  H2gene      | 1216  | No  | NA | 0     | 0  | Low-quality    | Genome-fragment | 2.95            | 0     | 0     |
| S8_vx_k141_32227  full    | 1216  | No  | NA | 1     | 0  | Low-quality    | Genome-fragment | 2.66            | 0     | 0     |
| S8_vx_k141_101750  full   | 1216  | No  | NA | 0     | 0  | Low-quality    | Genome-fragment | 0.83            | 0     | 0     |
| S11_vx_k141_29765  full   | 2507  | No  | NA | 0     | 0  | Not-determined | Genome-fragment | NA              | 0     | 0     |
| S11_vx_k141_62486  full   | 2490  | No  | NA | 0     | 1  | Not-determined | Genome-fragment | NA              | 0     | 0     |
| S17_vx_k141_35265  full   | 1217  | No  | NA | 0     | 3  | Low-quality    | Genome-fragment | 0.73            | 0     | 0     |
| S14_extracted_k141_13479  | 1217  | No  | NA | 0     | 0  | Low-quality    | Genome-fragment | 2.38            | 0     | 0     |
| S1_vx_k141_19729  H2gene  | 1217  | No  | NA | 1     | 0  | Low-quality    | Genome-fragment | 2.56            | 0     | 0     |
| S11_vx_k141_88890  full   | 2360  | No  | NA | 0     | 1  | Not-determined | Genome-fragment | NA              | 0     | 0     |
| S3_vx_k141_124544  H2gene | 1217  | No  | NA | 0     | 0  | Low-quality    | Genome-fragment | 2.52            | 0     | 0     |
| S7_vx_9156  full          | 1217  | No  | NA | 2     | 0  | Low-quality    | Genome-fragment | 3.62            | 0     | 0     |
| S11_vx_k141_24067  full   | 1103  | No  | NA | 0     | 0  | Not-determined | Genome-fragment | NA              | 0     | 0     |
| S16_extracted_122893      | 1217  | No  | NA | 0     | 0  | Low-quality    | Genome-fragment | 2.45            | 0     | 0     |
| S11_vx_k141_36484  full   | 3995  | No  | NA | 0     | 0  | Not-determined | Genome-fragment | NA              | 0     | 0     |
| S11_vx_k141_24082  full   | 3699  | No  | NA | 0     | 2  | Not-determined | Genome-fragment | NA              | 0     | 0     |
| S16_vx_41545              |       |     |    |       |    |                |                 |                 |       |       |



|                            |       |     |       |    |    |                |                 |    |       |       |
|----------------------------|-------|-----|-------|----|----|----------------|-----------------|----|-------|-------|
| S11_vs_k141_43449  full    | 8786  | No  | NA    | 0  | 5  | Not-determined | Genome-fragment | NA | 0     | 0     |
| S1_extracted_k141_10420    | 1219  | No  | NA    | 1  | 0  | Low-quality    | Genome-fragment | NA | 3.3   | 0     |
| S3_vs_k141_109021  full    | 1219  | No  | NA    | 0  | 0  | Low-quality    | Genome-fragment | NA | 2.5   | 0     |
| S7_vs_129180  H2gene       | 1219  | No  | NA    | 1  | 0  | Low-quality    | Genome-fragment | NA | 0.38  | 0     |
| S11_vs_k141_49275  full    | 2126  | No  | NA    | 0  | 1  | Not-determined | Genome-fragment | NA | 0     | 0     |
| S11_vs_k141_10924  full    | 4257  | No  | NA    | 0  | 0  | Not-determined | Genome-fragment | NA | 0     | 0     |
| S16_vs_140160  full        | 1219  | Yes |       | 1  | 1  | Low-quality    | Genome-fragment | NA | 0.6   | 56.36 |
| S10_extracted_k4190        | 1219  | Yes | 532   | 3  | 1  | Low-quality    | Genome-fragment | NA | 2.4   | 35.52 |
| S10_vs_k4224  full         | 1219  | No  | NA    | 1  | 0  | Low-quality    | Genome-fragment | NA | 1.47  | 0     |
| S12_vs_k141_10097  full    | 1219  | No  | NA    | 3  | 0  | Low-quality    | Genome-fragment | NA | 1.99  | 0     |
| S8_vs_k141_112174  full    | 1219  | No  | NA    | 0  | 0  | Low-quality    | Genome-fragment | NA | 2.27  | 0     |
| S11_vs_k141_52773  full    | 1351  | No  | NA    | 0  | 0  | Not-determined | Genome-fragment | NA | 1.67  | 0     |
| S17_extracted_k141_117251  | 1220  | No  | NA    | 0  | 0  | Low-quality    | Genome-fragment | NA | 1.21  | 0     |
| S11_vs_k141_68842  full    | 1948  | No  | NA    | 0  | 1  | Not-determined | Genome-fragment | NA | 0     | 0     |
| S11_vs_k141_43482  full    | 1135  | No  | NA    | 0  | 0  | Not-determined | Genome-fragment | NA | 0     | 0     |
| S11_vs_k141_49362  full    | 8365  | No  | NA    | 0  | 0  | Not-determined | Genome-fragment | NA | 0     | 0     |
| S17_vs_k141_7868  full     | 1220  | No  | NA    | 1  | 0  | Low-quality    | Genome-fragment | NA | 2.86  | 0     |
| S17_vs_k141_3436  H2gene   | 1220  | No  | NA    | 2  | 0  | Low-quality    | Genome-fragment | NA | 3.11  | 0     |
| S9_vs_k141_16329  full     | 1220  | No  | NA    | 0  | 0  | Low-quality    | Genome-fragment | NA | 3.63  | 0     |
| S11_vs_k141_82863  full    | 1220  | No  | NA    | 0  | 0  | Low-quality    | Genome-fragment | NA | 3.07  | 0     |
| S13_vs_112026  full        | 1220  | No  | NA    | 0  | 0  | Low-quality    | Genome-fragment | NA | 0.8   | 0     |
| S14_vs_k141_23295  full    | 1220  | No  | NA    | 1  | 0  | Low-quality    | Genome-fragment | NA | 2.88  | 0     |
| S5_vs_k141_9459  H2gene    | 1220  | No  | NA    | 1  | 0  | Low-quality    | Genome-fragment | NA | 0.84  | 0     |
| S11_vs_k141_43533  full    | 1191  | No  | NA    | 0  | 0  | Not-determined | Genome-fragment | NA | 0     | 0     |
| S11_vs_k141_68913  full    | 5864  | No  | NA    | 0  | 2  | Not-determined | Genome-fragment | NA | 2.53  | 0     |
| S5_vs_k141_68384  H2gene   | 1220  | No  | NA    | 1  | 0  | Low-quality    | Genome-fragment | NA | 1.47  | 0     |
| S7_extracted_36307         | 1220  | No  | NA    | 0  | 0  | Low-quality    | Genome-fragment | NA | 10.67 | 0     |
| S11_vs_k141_43557  full    | 1689  | No  | NA    | 0  | 1  | Not-determined | Genome-fragment | NA | 2.83  | 0     |
| S7_vs_21225  H2gene        | 1220  | No  | NA    | 0  | 0  | Low-quality    | Genome-fragment | NA | 0.71  | 0     |
| S15_extracted_952          | 1220  | No  | NA    | 1  | 0  | Low-quality    | Genome-fragment | NA | 4.04  | 0     |
| S4_extracted_4499          | 1220  | No  | NA    | 3  | 0  | Low-quality    | Genome-fragment | NA | 0.77  | 0     |
| S6_vs_k141_25592  full     | 1220  | No  | NA    | 0  | 0  | Low-quality    | Genome-fragment | NA | 0     | 0     |
| S11_vs_k141_43567  full    | 1422  | No  | NA    | 0  | 0  | Not-determined | Genome-fragment | NA | 0.74  | 0     |
| S8_extracted_k141_69420    | 1220  | No  | NA    | 1  | 0  | Low-quality    | Genome-fragment | NA | 0     | 0     |
| S11_vs_k141_49455  full    | 2150  | No  | NA    | 0  | 2  | Not-determined | Genome-fragment | NA | 0     | 0     |
| S11_vs_k141_36895  full    | 4309  | No  | NA    | 0  | 3  | Not-determined | Genome-fragment | NA | 3.44  | 0     |
| S8_vs_k141_154938  full    | 1220  | No  | NA    | 0  | 0  | Low-quality    | Genome-fragment | NA | 2.53  | 0     |
| S9_vs_k141_59855  full     | 1221  | No  | NA    | 0  | 0  | Low-quality    | Genome-fragment | NA | 2.97  | 0     |
| S7_vs_39584  full          | 1221  | No  | NA    | 0  | 0  | Low-quality    | Genome-fragment | NA | 3.1   | 0     |
| S7_vs_78585  full          | 1221  | No  | NA    | 2  | 0  | Low-quality    | Genome-fragment | NA | 2.96  | 0     |
| S11_vs_k141_62884  full    | 4096  | No  | NA    | 0  | 0  | Not-determined | Genome-fragment | NA | 0     | 0     |
| S7_vs_11379  full          | 1221  | No  | NA    | 0  | 0  | Low-quality    | Genome-fragment | NA | 0     | 0     |
| S11_vs_k141_95849  full    | 2455  | No  | NA    | 0  | 0  | Not-determined | Genome-fragment | NA | 2.74  | 0     |
| S16_vs_114919  H2gene      | 1221  | No  | NA    | 2  | 0  | Low-quality    | Genome-fragment | NA | 3.71  | 0     |
| S12_vs_k141_125345  H2gene | 1221  | No  | NA    | 1  | 0  | Low-quality    | Genome-fragment | NA | 0.53  | 0     |
| S17_vs_k141_107860  full   | 1222  | No  | NA    | 0  | 0  | Low-quality    | Genome-fragment | NA | 2.42  | 0     |
| S11_vs_k141_84565  full    | 1222  | No  | NA    | 0  | 0  | Low-quality    | Genome-fragment | NA | 70.15 | 0     |
| S11_vs_k141_56762  full    | 27623 | No  | NA    | 6  | 2  | Medium-quality | Genome-fragment | NA | 2.71  | 0     |
| S14_extracted_k141_12810   | 1222  | No  | NA    | 0  | 0  | Low-quality    | Genome-fragment | NA | 2.83  | 0     |
| S14_vs_k141_85743  full    | 1222  | No  | NA    | 0  | 0  | Low-quality    | Genome-fragment | NA | 0     | 0     |
| S11_vs_k141_59508  full    | 1515  | No  | NA    | 0  | 2  | Not-determined | Genome-fragment | NA | 0     | 0     |
| S11_vs_k141_26967  full    | 4853  | No  | NA    | 0  | 2  | Not-determined | Genome-fragment | NA | 0     | 0     |
| S11_vs_k141_82331  full    | 97795 | Yes | 37251 | 16 | 31 | Complete       | High-quality    | NA | 100   | 61.91 |
| S14_vs_k141_100565  full   | 1222  | No  | NA    | 2  | 0  | Low-quality    | Genome-fragment | NA | 3.28  | 0     |
| S3_extracted_k141_40058    | 1222  | No  | NA    | 0  | 1  | Low-quality    | Genome-fragment | NA | 0.86  | 0     |
| S3_vs_k141_70453  full     | 1222  | No  | NA    | 0  | 0  | Low-quality    | Genome-fragment | NA | 2.13  | 0     |
| S3_vs_k141_68252  H2gene   | 1222  | No  | NA    | 0  | 0  | Low-quality    | Genome-fragment | NA | 2.47  | 0     |
| S5_vs_k141_7298  full      | 1222  | No  | NA    | 0  | 0  | Low-quality    | Genome-fragment | NA | 19.34 | 0     |
| S7_vs_36065  H2gene        | 1222  | No  | NA    | 2  | 0  | Low-quality    | Genome-fragment | NA | 2.91  | 0     |
| S16_extracted_2449         | 1542  | No  | NA    | 0  | 1  | Not-determined | Genome-fragment | NA | 2.17  | 0     |
| S11_vs_k141_59582  full    | 1222  | No  | NA    | 0  | 1  | Low-quality    | Genome-fragment | NA | 3.15  | 0     |
| S12_extracted_k141_158287  | 1222  | No  | NA    | 0  | 0  | Low-quality    | Genome-fragment | NA | 0     | 0     |
| S11_vs_k141_30253  full    | 2281  | No  | NA    | 0  | 0  | Not-determined | Genome-fragment | NA | 2.23  | 0     |
| S12_vs_k141_33280  full    | 1222  | No  | NA    | 0  | 3  | Not-determined | Genome-fragment | NA | 0.75  | 0     |
| S11_vs_k141_24817  full    | 8558  | No  | NA    | 0  | 0  | Low-quality    | Genome-fragment | NA | 0     | 0     |
| S8_extracted_k141_127452   | 1222  | No  | NA    | 1  | 0  | Low-quality    | Genome-fragment | NA | 0     | 0     |
| S11_vs_k141_4776  full     | 2359  | No  | NA    | 0  | 3  | Not-determined | Genome-fragment | NA | 0.75  | 0     |
| S9_vs_k141_50716  full     | 1223  | No  | NA    | 0  | 0  | Low-quality    | Genome-fragment | NA | 0     | 0     |
| S11_vs_k141_102435  full   | 1731  | No  | NA    | 0  | 0  | Not-determined | Genome-fragment | NA | 0     | 0     |
| S5_extracted_k141_6992     | 1223  | No  | NA    | 0  | 1  | Low-quality    | Genome-fragment | NA | 0.3   | 0     |
| S5_extracted_k141_39032    | 1223  | No  | NA    | 0  | 0  | Low-quality    | Genome-fragment | NA | 2.03  | 0     |
| S11_vs_k141_89320  full    | 2657  | No  | NA    | 0  | 1  | Not-determined | Genome-fragment | NA | 2.86  | 0     |
| S5_vs_k141_141280  full    | 1223  | No  | NA    | 0  | 0  | Low-quality    | Genome-fragment | NA | 2.86  | 0     |
| S11_vs_k141_96031  full    | 2428  | No  | NA    | 0  | 2  | Not-determined | Genome-fragment | NA | 2.86  | 0     |
| S7_vs_97560  full          | 1223  | No  | NA    | 0  | 0  | Low-quality    | Genome-fragment | NA | 2.59  | 0     |
| S16_extracted_21084        | 1223  | No  | NA    | 0  | 0  | Low-quality    | Genome-fragment | NA | 2.13  | 0     |
| S11_vs_k141_96048  full    | 1962  | No  | NA    | 0  | 0  | Not-determined | Genome-fragment | NA | 2.92  | 0     |
| S10_extracted_20242        | 1223  | No  | NA    | 0  | 0  | Low-quality    | Genome-fragment | NA | 1.39  | 0     |
| S11_vs_k141_96059  full    | 4942  | No  | NA    | 0  | 5  | Not-determined | Genome-fragment | NA | 0     | 0     |
| S10_vs_37409  H2gene       | 1223  | No  | NA    | 0  | 0  | Low-quality    | Genome-fragment | NA | 2.09  | 0     |
| S12_vs_k141_166154  H2gene | 1223  | No  | NA    | 0  | 0  | Low-quality    | Genome-fragment | NA | 0     | 0     |
| S11_vs_k141_37171  full    | 2068  | No  | NA    | 0  | 0  | Not-determined | Genome-fragment | NA | 0     | 0     |
| S11_vs_k141_48421  full    | 5747  | No  | NA    | 0  | 2  | Not-determined | Genome-fragment | NA | 0     | 0     |
| S9_extracted_k141_22052    | 1224  | No  | NA    | 0  | 1  | Low-quality    | Genome-fragment | NA | 2.87  | 0     |
| S11_vs_k141_56994  full    | 1346  | No  | NA    | 0  | 1  | Not-determined | Genome-fragment | NA | 0     | 0     |
| S11_vs_k141_56995  full    | 2553  | No  | NA    | 0  | 0  | Not-determined | Genome-fragment | NA | 0     | 0     |
| S11_vs_k141_3840  full     | 1224  | No  | NA    | 1  | 0  | Low-quality    | Genome-fragment | NA | 2.38  | 0     |
| S11_vs_k141_4868  full     | 1571  | No  | NA    | 0  | 0  | Not-determined | Genome-fragment | NA | 3.16  | 0     |
| S11_vs_k141_23369  H2gene  | 1224  | No  | NA    | 2  | 0  | Low-quality    | Genome-fragment | NA | 0     | 0     |
| S11_vs_k141_37159  full    | 1203  | No  | NA    | 0  | 2  | Not-determined | Genome-fragment | NA | 0.66  | 0     |
| S11_vs_k141_69151  full    | 2372  | No  | NA    | 0  | 0  | Not-determined | Genome-fragment | NA | 3.59  | 0     |
| S11_vs_k141_82477  full    | 1474  | No  | NA    | 0  | 0  | Not-determined | Genome-fragment | NA | 4.3   | 0     |
| S13_extracted_33151        | 1224  | No  | NA    | 0  | 1  | Low-quality    | Genome-fragment | NA | 0.8   | 0     |
| S14_extracted_k141_13264   | 1224  | No  | NA    | 0  | 0  | Low-quality    | Genome-fragment | NA | 2.12  | 0     |
| S11_vs_k141_17611  full    | 2345  | No  | NA    | 0  | 0  | Not-determined | Genome-fragment | NA | 2.84  | 0     |
| S14_vs_k141_94290  full    | 1224  | No  | NA    | 0  | 0  | Low-quality    | Genome-fragment | NA | 3.14  | 0     |
| S14_vs_k141_30837  H2gene  | 1224  | No  | NA    | 1  | 0  | Low-quality    | Genome-fragment | NA | 2.89  | 0     |
| S11_vs_k141_84403  full    | 1617  | No  | NA    | 0  | 0  | Not-determined | Genome-fragment | NA | 0.66  | 0     |
| S14_vs_k141_76474  H2gene  | 1224  | No  | NA    | 2  | 0  | Low-quality    | Genome-fragment | NA | 3.59  | 0     |
| S11_extracted_k141_109621  | 1224  | No  | NA    | 1  | 0  | Low-quality    | Genome-fragment | NA | 4.3   | 0     |
| S11_vs_k141_17628  full    | 1499  | No  | NA    | 0  | 0  | Not-determined | Genome-fragment | NA | 53.56 | 0     |
| S5_extracted_k141_33384    | 1224  | No  | NA    | 2  | 0  | Low-quality    | Genome-fragment | NA | 3.29  | 0     |
| S5_vs_k141_132720  full    | 1224  | No  | NA    | 0  | 0  | Low-quality    | Genome-fragment | NA | 2.39  | 0     |
| S11_vs_k141_11267  full    | 8789  | No  | NA    | 13 | 2  | Medium-quality | Genome-fragment | NA | 0.31  | 0     |
| S11_vs_k141_17649  full    | 1971  | No  | NA    | 0  | 0  | Not-determined | Genome-fragment | NA | 2.27  | 0     |
| S16_extracted_16127        | 1224  | No  | NA    | 2  | 0  | Low-quality    | Genome-fragment | NA | 0.81  | 0     |
| S16_vs_17872  full         | 1224  | No  | NA    | 3  | 0  | Low-quality    | Genome-fragment | NA | 2.66  | 0     |
| S10_vs_110997  full        | 1224  | No  | NA    | 0  | 0  | Low-quality    | Genome-fragment | NA | 1.09  | 0     |
| S11_vs_k141_49813  full    | 1709  | No  | NA    | 0  | 2  | Not-determined | Genome-fragment | NA | 0     | 0     |
| S12_vs_k141_142966  full   | 1224  | No  | NA    | 0  | 3  | Low-quality    | Genome-fragment | NA | 0.27  | 0     |
| S12_vs_k141_19188  full    | 1224  | No  | NA    | 1  | 0  | Low-quality    | Genome-fragment | NA | 2.27  | 0     |
| S12_vs_k141_51157  full    | 1224  | No  | NA    | 1  | 0  | Low-quality    | Genome-fragment | NA | 0.81  | 0     |
| S6_extracted_k141_17865    | 1224  | No  | NA    | 0  | 1  | Low-quality    | Genome-fragment | NA | 2.66  | 0     |
| S6_extracted_k141_22681    | 1224  | No  | NA    | 0  | 1  | Low-quality    | Genome-fragment | NA | 1.09  | 0     |
| S8_extracted_k141_57635    | 1224  | No  | NA    | 0  | 0  | Not-determined | Genome-fragment | NA | 2.85  | 0     |
| S11_vs_k141_37293  full    | 1747  | No  | NA    | 0  | 0  | Low-quality    | Genome-fragment | NA | 2.29  | 0     |
| S11_vs_k141_11205  full    | 1225  | No  | NA    | 0  | 1  | Low-quality    | Genome-fragment | NA | 1.28  | 0     |
| S13_vs_26789  full         | 1225  | No  | NA    | 0  | 0  | Low-quality    | Genome-fragment | NA | 3.2   | 0     |
| S13_vs_91521  full         | 1225  | No  | NA    | 0  | 0  | Low-quality    | Genome-fragment | NA | 2.72  | 0     |
| S14_extracted_k141_52289   | 1225  | No  | NA    | 1  | 0  | Low-quality    | Genome-fragment | NA | 2.29  | 0     |
| S14_extracted_k141_24483   | 1225  | No  | NA    | 0  | 0  | Low-quality    | Genome-fragment | NA | 0.9   | 0     |
| S11_vs_k141_96269  full    | 1044  | No  | NA    | 0  | 0  | Not-determined | Genome-fragment | NA | 2.08  | 0     |
| S14_vs_k141_86365  full    | 1225  | No  | NA    | 0  | 0  | Low-quality    | Genome-fragment | NA | 1.94  | 0     |
| S5_extracted_k141_108995   | 1225  | No  | NA    | 0  | 0  | Low-quality    | Genome-fragment | NA | 2.77  | 0     |
| S11_vs_k141_37345  full    | 1269  | No  | NA    | 0  | 0  | Not-determined | Genome-fragment | NA | 2.57  | 0     |
| S5_vs_k141_113291  full    | 1225  | No  | NA    | 0  | 1  | Low-quality    | Genome-fragment | NA | 2.84  | 0     |
| S11_vs_k141_82619  full    | 1827  | No  | NA    | 0  | 1  | Not-determined | Genome-fragment | NA | 0.96  | 0     |
| S7_extracted_11633         | 1225  | No  | NA    | 0  | 0  | Low-quality    | Genome-fragment | NA | 3.71  | 0     |
| S7_vs_22404  full          | 1225  | No  | NA    | 0  | 0  | Low-quality    | Genome-fragment | NA | 0     | 0     |
| S7_vs_31669  full          | 1225  | No  | NA    | 3  | 0  | Low-quality    | Genome-fragment | NA | 0     | 0     |
| S11_vs_k141_76655  full    | 8533  | No  | NA    | 0  | 0  | Low-quality    | Genome-fragment | NA | 0     | 0     |
| S7_vs_118160  H2gene       | 1225  | No  | NA    | 1  | 0  | Low-quality    | Genome-fragment | NA | 2.84  | 0     |
| S16_vs_52841  full         | 1225  | No  | NA    | 0  | 1  | Low-quality    | Genome-fragment | NA | 2.98  | 0     |
| S10_vs_82234  full         | 1225  | No  | NA    | 2  |    |                |                 |    |       |       |



|                           |         |       |    |    |     |   |                |                 |       |      |
|---------------------------|---------|-------|----|----|-----|---|----------------|-----------------|-------|------|
| S12_vs_k141_174156        | [full]  | 1226  | No | NA | 1   | 0 | Low-quality    | Genome-fragment | 2.3   | 0    |
| S12_vs_k141_136286        | [full]  | 1226  | No | NA | 1   | 0 | Low-quality    | Genome-fragment | 3.83  | 0    |
| S12_vs_k141_58496         | [full]  | 1226  | No | NA | 0   | 0 | Low-quality    | Genome-fragment | 3.04  | 0    |
| S11_vs_k141_30764         | [full]  | 1235  | No | NA | 0   | 0 | Not-determined | Genome-fragment | NA    | 0    |
| S12_vs_k141_125306        | [full]  | 1226  | No | NA | 0   | 0 | Low-quality    | Genome-fragment | 1.98  | 0    |
| S11_vs_k141_69566         | [full]  | 1407  | No | NA | 0   | 0 | Not-determined | Genome-fragment | NA    | 0    |
| S6_vs_k141_9901           | [full]  | 1226  | No | NA | 0   | 1 | Low-quality    | Genome-fragment | 0.96  | 0    |
| S6_vs_k141_31519          | [full]  | 1226  | No | NA | 0   | 0 | Low-quality    | Genome-fragment | 0.81  | 0    |
| S8_extracted_k141_139112  |         | 1226  | No | NA | 0   | 0 | Low-quality    | Genome-fragment | 2.48  | 0    |
| S11_vs_k141_5140          | [full]  | 1113  | No | NA | 0   | 0 | Not-determined | Genome-fragment | NA    | 0    |
| S8_vs_k141_207254         | [full]  | 1226  | No | NA | 0   | 0 | Low-quality    | Genome-fragment | 2.63  | 0    |
| S13_vs_115283             | [full]  | 1227  | No | NA | 1   | 1 | Low-quality    | Genome-fragment | 1.3   | 0    |
| S11_vs_k141_25347         | [full]  | 1140  | No | NA | 0   | 1 | Not-determined | Genome-fragment | NA    | 0    |
| S11_vs_k141_82944         | [full]  | 1390  | No | NA | 0   | 2 | Not-determined | Genome-fragment | NA    | 0    |
| S11_vs_k141_37666         | [full]  | 13735 | No | NA | 7   | 0 | Medium-quality | Genome-fragment | 60.5  | 0    |
| S3_extracted_k141_69732   |         | 1227  | No | NA | 0   | 1 | Low-quality    | Genome-fragment | 1.55  | 0    |
| S3_extracted_k141_95557   |         | 1227  | No | NA | 0   | 0 | Low-quality    | Genome-fragment | 1.64  | 0    |
| S11_vs_k141_76900         | [full]  | 2217  | No | NA | 0   | 2 | Not-determined | Genome-fragment | NA    | 0    |
| S11_vs_k141_44211         | [full]  | 3661  | No | NA | 0   | 0 | Not-determined | Genome-fragment | NA    | 0    |
| S11_vs_k141_69626         | [full]  | 1297  | No | NA | 0   | 1 | Not-determined | Genome-fragment | NA    | 0    |
| S5_extracted_k141_45716   |         | 1227  | No | NA | 1   | 0 | Low-quality    | Genome-fragment | 0.82  | 0    |
| S16_vs_6187               | [full]  | 1227  | No | NA | 0   | 0 | Low-quality    | Genome-fragment | 2.78  | 0    |
| S2_extracted_k141_13623   |         | 1227  | No | NA | 2   | 0 | Low-quality    | Genome-fragment | 4.05  | 0    |
| S4_extracted_7205         |         | 1227  | No | NA | 0   | 2 | Low-quality    | Genome-fragment | 0.42  | 0    |
| S11_vs_k141_44255         | [full]  | 1780  | No | NA | 0   | 1 | Low-quality    | Genome-fragment | NA    | 0    |
| S6_extracted_k141_51408   |         | 1227  | No | NA | 0   | 1 | Low-quality    | Genome-fragment | 0.41  | 0    |
| S8_extracted_k141_315441  |         | 1227  | No | NA | 0   | 0 | Low-quality    | Genome-fragment | 0.95  | 0    |
| S17_extracted_k141_94303  |         | 1228  | No | NA | 0   | 0 | Low-quality    | Genome-fragment | 0.32  | 0    |
| S9_extracted_k141_37832   |         | 1228  | No | NA | 0   | 0 | Low-quality    | Genome-fragment | 2.24  | 0    |
| S9_vs_k141_89331          | [full]  | 1228  | No | NA | 0   | 1 | Low-quality    | Genome-fragment | 2.18  | 0    |
| S9_vs_k141_47758          | [full]  | 1228  | No | NA | 0   | 2 | Low-quality    | Genome-fragment | 0.69  | 0    |
| S11_extracted_k141_53942  |         | 1228  | No | NA | 0   | 0 | Low-quality    | Genome-fragment | 2.17  | 0    |
| S14_extracted_k141_66112  |         | 1228  | No | NA | 1   | 0 | Low-quality    | Genome-fragment | 9.11  | 0    |
| S11_vs_k141_69740         | [full]  | 1310  | No | NA | 0   | 1 | Not-determined | Genome-fragment | NA    | 0    |
| S1_vs_k141_133999         | [full]  | 1228  | No | NA | 1   | 0 | Low-quality    | Genome-fragment | 2.91  | 0    |
| S1_vs_k141_74870          | [full]  | 1228  | No | NA | 1   | 0 | Low-quality    | Genome-fragment | 1.25  | 0    |
| S11_vs_k141_50108         | [full]  | 8747  | No | NA | 0   | 7 | Not-determined | Genome-fragment | NA    | 0    |
| S3_vs_k141_73375          | [full]  | 1228  | No | NA | 3   | 0 | Low-quality    | Genome-fragment | 2.02  | 0    |
| S3_vs_k141_104851         | [full]  | 1228  | No | NA | 0   | 0 | Low-quality    | Genome-fragment | 2.15  | 0    |
| S5_vs_k141_58948          | [full]  | 1228  | No | NA | 1   | 0 | Low-quality    | Genome-fragment | 3.1   | 0    |
| S11_vs_k141_25447         | [full]  | 1107  | No | NA | 0   | 0 | Not-determined | Genome-fragment | NA    | 0    |
| S7_extracted_123190       |         | 1228  | No | NA | 0   | 0 | Low-quality    | Genome-fragment | 1.65  | 0    |
| S7_vs_75108               | [full]  | 1228  | No | NA | 1   | 0 | Low-quality    | Genome-fragment | 2.54  | 0    |
| S7_vs_86528               | [full]  | 1228  | No | NA | 0   | 1 | Low-quality    | Genome-fragment | 0.88  | 0    |
| S16_extracted_5441        |         | 1228  | No | NA | 0   | 1 | Low-quality    | Genome-fragment | 3.8   | 0    |
| S11_vs_k141_63563         | [full]  | 1104  | No | NA | 0   | 0 | Not-determined | Genome-fragment | NA    | 0    |
| S16_extracted_32823       |         | 1228  | No | NA | 4   | 0 | Low-quality    | Genome-fragment | 3.31  | 0    |
| S12_extracted_k141_130123 |         | 1228  | No | NA | 0   | 3 | Low-quality    | Genome-fragment | 0.32  | 0    |
| S12_extracted_k141_170907 |         | 1228  | No | NA | 0   | 1 | Low-quality    | Genome-fragment | 0.76  | 0    |
| S12_vs_k141_147023        | [full]  | 1228  | No | NA | 0   | 0 | Low-quality    | Genome-fragment | 2.93  | 0    |
| S11_vs_k141_69816         | [full]  | 3190  | No | NA | 0   | 0 | Not-determined | Genome-fragment | NA    | 0    |
| S11_vs_k141_25485         | [full]  | 1238  | No | NA | 0   | 0 | Not-determined | Genome-fragment | NA    | 0    |
| S11_vs_k141_77087         | [full]  | 2359  | No | NA | 0   | 0 | Not-determined | Genome-fragment | NA    | 0    |
| S15_extracted_70730       |         | 1228  | No | NA | 0   | 0 | Low-quality    | Genome-fragment | 2.73  | 0    |
| S6_extracted_k141_40405   |         | 1228  | No | NA | 0   | 0 | Low-quality    | Genome-fragment | 3.46  | 0    |
| S11_vs_k141_18191         | [full]  | 7789  | No | NA | 1   | 4 | Not-determined | Genome-fragment | NA    | 0    |
| S11_vs_k141_77101         | [full]  | 3383  | No | NA | 0   | 0 | Not-determined | Genome-fragment | NA    | 0    |
| S11_vs_k141_44383         | [full]  | 5070  | No | NA | 0   | 1 | Not-determined | Genome-fragment | NA    | 0    |
| S11_vs_k141_37881         | [full]  | 2675  | No | NA | 0   | 0 | Not-determined | Genome-fragment | NA    | 0    |
| S8_vs_k141_53007          | [full]  | 1228  | No | NA | 0   | 0 | Low-quality    | Genome-fragment | 2.03  | 0    |
| S11_vs_k141_77137         | [full]  | 9045  | No | NA | 0   | 7 | Not-determined | Genome-fragment | NA    | 0    |
| S11_vs_k141_77067         | [full]  | 1229  | No | NA | 0   | 1 | Low-quality    | Genome-fragment | 0.37  | 0    |
| S11_vs_k141_50200         | [full]  | 4454  | No | NA | 0   | 0 | Not-determined | Genome-fragment | NA    | 0    |
| S13_vs_130289             | [full]  | 1229  | No | NA | 0   | 0 | Low-quality    | Genome-fragment | 2.36  | 0    |
| S11_vs_k141_102841        | [full]  | 1649  | No | NA | 0   | 0 | Not-determined | Genome-fragment | NA    | 0    |
| S11_vs_k141_31087         | [full]  | 2171  | No | NA | 0   | 1 | Not-determined | Genome-fragment | NA    | 0    |
| S11_vs_k141_57664         | [full]  | 1652  | No | NA | 0   | 2 | Not-determined | Genome-fragment | NA    | 0    |
| S1_extracted_k141_90407   |         | 1229  | No | NA | 0   | 1 | Low-quality    | Genome-fragment | 0.86  | 0    |
| S1_vs_k141_104688         | [full]  | 1229  | No | NA | 0   | 0 | Low-quality    | Genome-fragment | 0.53  | 0    |
| S5_extracted_k141_68693   |         | 1229  | No | NA | 0   | 0 | Low-quality    | Genome-fragment | 3.27  | 0    |
| S5_vs_k141_3004           | [full]  | 1229  | No | NA | 0   | 0 | Low-quality    | Genome-fragment | 2.5   | 0    |
| S7_vs_36975               | [H2gme] | 1229  | No | NA | 0   | 0 | Low-quality    | Genome-fragment | 3.29  | 0    |
| S11_vs_k141_50227         | [full]  | 1013  | No | NA | 0   | 0 | Not-determined | Genome-fragment | NA    | 0    |
| S16_extracted_371065      |         | 1229  | No | NA | 0   | 0 | Low-quality    | Genome-fragment | 0.76  | 0    |
| S16_vs_167261             | [full]  | 1229  | No | NA | 0   | 0 | Low-quality    | Genome-fragment | 0.71  | 0    |
| S11_vs_k141_98864         | [full]  | 1137  | No | NA | 0   | 1 | Not-determined | Genome-fragment | NA    | 0    |
| S10_extracted_26754       |         | 1229  | No | NA | 0   | 0 | Low-quality    | Genome-fragment | 0.94  | 0    |
| S11_vs_k141_96876         | [full]  | 2907  | No | NA | 0   | 1 | Not-determined | Genome-fragment | NA    | 0    |
| S11_vs_k141_18256         | [full]  | 1229  | No | NA | 1   | 2 | Not-determined | Genome-fragment | NA    | 0    |
| S10_vs_117586             | [full]  | 1229  | No | NA | 0   | 0 | Low-quality    | Genome-fragment | 2.74  | 0    |
| S11_vs_k141_69897         | [full]  | 6612  | No | NA | 0   | 1 | Not-determined | Genome-fragment | NA    | 0    |
| S12_vs_k141_137900        | [full]  | 1229  | No | NA | 0   | 0 | Low-quality    | Genome-fragment | 1.53  | 0    |
| S12_vs_k141_139452        | [full]  | 1229  | No | NA | 1   | 0 | Low-quality    | Genome-fragment | 2.9   | 0    |
| S11_vs_k141_31140         | [full]  | 7306  | No | NA | 0   | 1 | Not-determined | Genome-fragment | NA    | 0    |
| S6_extracted_k141_46334   |         | 1229  | No | NA | 0   | 1 | Low-quality    | Genome-fragment | 1.35  | 0    |
| S8_extracted_k141_99578   |         | 1229  | No | NA | 0   | 1 | Low-quality    | Genome-fragment | 1.19  | 0    |
| S11_vs_k141_37929         | [full]  | 3496  | No | NA | 0   | 3 | Not-determined | Genome-fragment | NA    | 0    |
| S11_vs_k141_57720         | [full]  | 2092  | No | NA | 0   | 1 | Not-determined | Genome-fragment | NA    | 0    |
| S11_vs_k141_69825         | [full]  | 313   | No | NA | 0   | 1 | Not-determined | Genome-fragment | NA    | 0    |
| S8_vs_k141_70713          | [full]  | 1229  | No | NA | 0   | 0 | Low-quality    | Genome-fragment | 2.35  | 0    |
| S11_vs_k141_63756         | [full]  | 2659  | No | NA | 0   | 3 | Not-determined | Genome-fragment | NA    | 0    |
| S9_extracted_k141_58587   |         | 1230  | No | NA | 0   | 0 | Low-quality    | Genome-fragment | 0.72  | 0    |
| S11_vs_k141_44489         | [full]  | 2230  | No | NA | 0   | 0 | Not-determined | Genome-fragment | NA    | 0    |
| S9_vs_k141_45602          | [full]  | 1230  | No | NA | 2   | 0 | Low-quality    | Genome-fragment | 2.88  | 0    |
| S11_extracted_k141_69766  |         | 1230  | No | NA | 0   | 0 | Low-quality    | Genome-fragment | 1.76  | 0    |
| S11_vs_k141_44506         | [full]  | 4736  | No | NA | 0   | 3 | Not-determined | Genome-fragment | NA    | 0    |
| S11_vs_k141_31201         | [full]  | 8735  | No | NA | 0   | 3 | Not-determined | Genome-fragment | NA    | 0    |
| S14_vs_k141_6521          | [full]  | 1230  | No | NA | 0   | 1 | Low-quality    | Genome-fragment | 2.14  | 0    |
| S1_extracted_k141_130935  |         | 1230  | No | NA | 0   | 0 | Low-quality    | Genome-fragment | 0.65  | 0    |
| S3_extracted_k141_55063   |         | 1230  | No | NA | 0   | 0 | Low-quality    | Genome-fragment | 2.51  | 0    |
| S11_vs_k141_63825         | [full]  | 1365  | No | NA | 0   | 0 | Not-determined | Genome-fragment | NA    | 0    |
| S11_vs_k141_50337         | [full]  | 5860  | No | NA | 0   | 4 | Not-determined | Genome-fragment | NA    | 0    |
| S11_vs_k141_11850         | [full]  | 2031  | No | NA | 0   | 0 | Not-determined | Genome-fragment | NA    | 0    |
| S7_extracted_337464       |         | 1230  | No | NA | 0   | 1 | Low-quality    | Genome-fragment | 2.81  | 0    |
| S7_vs_3041                | [full]  | 1230  | No | NA | 0   | 0 | Low-quality    | Genome-fragment | 0.6   | 0    |
| S11_vs_k141_38049         | [full]  | 1508  | No | NA | 0   | 2 | Not-determined | Genome-fragment | NA    | 0    |
| S11_vs_k141_38054         | [full]  | 4709  | No | NA | 0   | 1 | Not-determined | Genome-fragment | NA    | 0    |
| S12_extracted_k141_47410  |         | 1230  | No | NA | 0   | 1 | Low-quality    | Genome-fragment | 0.8   | 0    |
| S11_vs_k141_69933         | [full]  | 1017  | No | NA | 0   | 1 | Not-determined | Genome-fragment | NA    | 0    |
| S6_extracted_k141_34751   |         | 1230  | No | NA | 0   | 2 | Low-quality    | Genome-fragment | 0.5   | 0    |
| S6_vs_k141_19489          | [full]  | 1230  | No | NA | 0   | 0 | Low-quality    | Genome-fragment | 4.23  | 0    |
| S6_vs_k141_12703          | [full]  | 1230  | No | NA | 0   | 0 | Low-quality    | Genome-fragment | 2.37  | 0    |
| S11_vs_k141_83298         | [full]  | 1402  | No | NA | 1   | 0 | Not-determined | Genome-fragment | NA    | 0    |
| S11_vs_k141_89911         | [full]  | 2236  | No | NA | 13  | 0 | Medium-quality | Genome-fragment | 52.7  | 0    |
| S8_extracted_k141_124191  |         | 1230  | No | NA | 1   | 0 | Low-quality    | Genome-fragment | 1.79  | 0    |
| S11_vs_k141_83299         | [full]  | 7677  | No | NA | 0   | 2 | Not-determined | Genome-fragment | NA    | 0    |
| S11_vs_k141_11918         | [full]  | 5619  | No | NA | 0   | 4 | Not-determined | Genome-fragment | NA    | 0    |
| S14_vs_k141_111631        | [full]  | 1231  | No | NA | 0   | 0 | Low-quality    | Genome-fragment | NA    | 0    |
| S11_vs_k141_97030         | [full]  | 2454  | No | NA | 0   | 0 | Not-determined | Genome-fragment | NA    | 0.83 |
| S11_extracted_k141_66689  |         | 1231  | No | NA | 0   | 0 | Low-quality    | Genome-fragment | 1.24  | 0    |
| S11_vs_k141_83349         | [full]  | 1278  | No | NA | 0   | 2 | Not-determined | Genome-fragment | NA    | 0    |
| S3_extracted_k141_45974   |         | 1231  | No | NA | 0   | 0 | Low-quality    | Genome-fragment | 2.83  | 0    |
| S5_extracted_k141_321720  |         | 1231  | No | NA | 1   | 0 | Low-quality    | Genome-fragment | 3.56  | 0    |
| S11_vs_k141_77381         | [full]  | 1467  | No | NA | 0   | 2 | Not-determined | Genome-fragment | NA    | 0    |
| S11_vs_k141_50010         | [full]  | 1668  | No | NA | 0   | 0 | Not-determined | Genome-fragment | NA    | 0    |
| S5_vs_k141_144667         | [full]  | 1231  | No | NA | 0   | 2 | Low-quality    | Genome-fragment | 1.38  | 0    |
| S11_vs_k141_83417         | [full]  | 2904  | No | NA | 0   | 1 | Not-determined | Genome-fragment | NA    | 0    |
| S11_vs_k141_31272         | [full]  | 2596  | No | NA | 0   | 0 | Not-determined | Genome-fragment | NA    | 0    |
| S11_vs_k141_97071         | [full]  | 59839 | No | NA | 0   | 8 | Not-determined | Genome-fragment | NA    | 0    |
| S11_vs_k141_25790         | [full]  | 1684  | No | NA | 0   | 2 | Not-determined | Genome-fragment | NA    | 0    |
| S11_vs_k141_83455         | [full]  | 1386  | No | NA | 0   | 0 | Not-determined | Genome-fragment | NA    | 0    |
| S11_vs_k141_25793         | [full]  | 1912  | No | NA | 0   | 0 | Not-determined | Genome-fragment | NA    | 0    |
| S7_vs_87621               | [full]  | 1231  | No | NA | 1   | 0 | Low-quality    | Genome-fragment | 3.06  | 0    |
| S11_vs_k141_119394        | [full]  | 54490 | No | NA | 23  | 1 | High-quality   | High-quality    | 98.71 | 0    |
| S11_vs_k141_50530         | [full]  | 1647  | No | NA | 0   | 0 | Not-determined | Genome-fragment | NA    | 0    |
| S11_vs_k141_90076         | [full]  | 3761  | No | NA | 0   | 1 | Not-determined | Genome-fragment | NA    | 0    |
| S11_vs_k141_57778         | [full]  | 2256  | No | NA | 0   | 2 | Not-determined | Genome-fragment | NA    | 0    |
| S7_vs_109094              | [full]  | 1231  | No | NA | 0</ |   |                |                 |       |      |



|                           |       |     |    |    |                |                 |                 |       |       |
|---------------------------|-------|-----|----|----|----------------|-----------------|-----------------|-------|-------|
| S11_vo_k141_12207         | 2734  | NA  | 0  | 4  | Not-determined | Genome-fragment | NA              | 0     |       |
| S11_vo_k141_13157         | 2341  | NA  | 0  | 2  | Not-determined | Genome-fragment | NA              | 0     |       |
| S11_vo_k141_103170        | 3988  | NA  | 0  | 1  | Not-determined | Genome-fragment | NA              | 0     |       |
| S11_vo_k141_54295         | 1233  | NA  | 1  | 0  | Low-quality    | Genome-fragment | 2.73            | 0     |       |
| S11_vo_k141_1781          | 1233  | NA  | 0  | 0  | Low-quality    | Genome-fragment | 3.05            | 0     |       |
| S11_vo_k141_83666         | 2432  | NA  | 18 | 0  | Medium-quality | Genome-fragment | 60.55           | 0     |       |
| S3_extracted_k141_17374   | 1233  | NA  | 1  | 0  | Low-quality    | Genome-fragment | 0.85            | 0     |       |
| S11_vo_k141_64232         | 1107  | NA  | 0  | 1  | Not-determined | Genome-fragment | NA              | 0     |       |
| S11_vo_k141_70263         | 4163  | NA  | 0  | 0  | Not-determined | Genome-fragment | NA              | 0     |       |
| S11_vo_k141_90335         | 9662  | NA  | 0  | 10 | Not-determined | Genome-fragment | NA              | 0     |       |
| S16_extracted_24279       | 1233  | NA  | 0  | 0  | Low-quality    | Genome-fragment | 1.89            | 0     |       |
| S11_vo_k141_77704         | 1516  | NA  | 0  | 0  | Not-determined | Genome-fragment | NA              | 0     |       |
| S16_extracted_46016       | 1233  | NA  | 1  | 0  | Low-quality    | Genome-fragment | 2.19            | 0     |       |
| S11_vo_k141_103252        | 1200  | NA  | 0  | 1  | Not-determined | Genome-fragment | NA              | 0     |       |
| S11_vo_k141_77734         | 1915  | NA  | 0  | 2  | Not-determined | Genome-fragment | NA              | 0     |       |
| S16_extracted_139978      | 1233  | NA  | 0  | 0  | Low-quality    | Genome-fragment | 2.1             | 0     |       |
| S12_vo_k141_176805        | 1233  | NA  | 1  | 0  | Low-quality    | Genome-fragment | 3.05            | 0     |       |
| S12_vo_k141_160554        | 1233  | NA  | 1  | 0  | Low-quality    | Genome-fragment | 2.71            | 0     |       |
| S17_extracted_k141_16240  | 1234  | NA  | 0  | 2  | Low-quality    | Genome-fragment | 1.73            | 0     |       |
| S11_vo_k141_103273        | 1743  | NA  | 0  | 1  | Not-determined | Genome-fragment | NA              | 0     |       |
| S9_vo_k141_80834          | 1234  | NA  | 0  | 2  | Low-quality    | Genome-fragment | 0.74            | 0     |       |
| S11_vo_k141_33683         | 1234  | NA  | 0  | 0  | Low-quality    | Genome-fragment | 3.01            | 0     |       |
| S11_vo_k141_64329         | 2790  | NA  | 0  | 2  | Not-determined | Genome-fragment | NA              | 0     |       |
| S13_vo_28539              | 1234  | NA  | 0  | 0  | Low-quality    | Genome-fragment | 3.04            | 0     |       |
| S14_extracted_k141_57064  | 1234  | NA  | 0  | 1  | Low-quality    | Genome-fragment | 2.7             | 0     |       |
| S11_vo_k141_97428         | 1487  | NA  | 0  | 0  | Not-determined | Genome-fragment | NA              | 0     |       |
| S14_extracted_k141_84338  | 1234  | NA  | 1  | 0  | Low-quality    | Genome-fragment | 2.44            | 0     |       |
| S1_extracted_k141_79606   | 1234  | NA  | 0  | 2  | Low-quality    | Genome-fragment | 0.48            | 0     |       |
| S3_vo_k141_51025          | 1234  | NA  | 0  | 0  | Low-quality    | Genome-fragment | 1.9             | 0     |       |
| S11_vo_k141_70434         | 2303  | NA  | 0  | 2  | Not-determined | Genome-fragment | NA              | 0     |       |
| S11_vo_k141_90510         | 3345  | NA  | 0  | 0  | Not-determined | Genome-fragment | NA              | 0     |       |
| S11_vo_k141_12483         | 8822  | NA  | 0  | 8  | Not-determined | Genome-fragment | NA              | 0     |       |
| S5_vo_k141_11282          | 1234  | NA  | 1  | 0  | Low-quality    | Genome-fragment | 2.27            | 0     |       |
| S7_extracted_689          | 1234  | NA  | 0  | 1  | Low-quality    | Genome-fragment | 0.13            | 0     |       |
| S7_vo_45576               | 1234  | NA  | 0  | 0  | Low-quality    | Genome-fragment | 2.97            | 0     |       |
| S16_extracted_22487       | 1234  | NA  | 0  | 0  | Low-quality    | Genome-fragment | 2.61            | 0     |       |
| S16_vo_134475             | 1234  | NA  | 1  | 0  | Low-quality    | Genome-fragment | 2.18            | 0     |       |
| S11_vo_k141_45120         | 3148  | NA  | 0  | 1  | Not-determined | Genome-fragment | NA              | 0     |       |
| S12_extracted_k141_30095  | 1234  | NA  | 0  | 0  | Low-quality    | Genome-fragment | 2.1             | 0     |       |
| S15_vo_28877              | 1234  | NA  | 0  | 1  | Low-quality    | Genome-fragment | 2.17            | 0     |       |
| S6_vo_k141_41379          | 1234  | NA  | 0  | 0  | Low-quality    | Genome-fragment | 2.89            | 0     |       |
| S8_extracted_k141_2486    | 1234  | NA  | 0  | 0  | Low-quality    | Genome-fragment | 1.67            | 0     |       |
| S11_vo_k141_83997         | 1706  | NA  | 0  | 0  | Not-determined | Genome-fragment | NA              | 0     |       |
| S17_vo_k141_128268        | 1235  | NA  | 0  | 0  | Low-quality    | Genome-fragment | 2.39            | 0     |       |
| S11_vo_k141_97591         | 2207  | NA  | 0  | 3  | Not-determined | Genome-fragment | NA              | 0     |       |
| S9_extracted_k141_50330   | 1235  | NA  | 0  | 0  | Low-quality    | Genome-fragment | 3.29            | 0     |       |
| S11_vo_k141_45223         | 1705  | NA  | 0  | 2  | Not-determined | Genome-fragment | NA              | 0     |       |
| S11_vo_k141_51044         | 1453  | NA  | 0  | 2  | Not-determined | Genome-fragment | NA              | 0     |       |
| S11_vo_k141_51057         | 5975  | NA  | 0  | 4  | Not-determined | Genome-fragment | NA              | 0     |       |
| S14_extracted_k141_96922  | 1235  | NA  | 4  | 0  | Low-quality    | Genome-fragment | 4.06            | 0     |       |
| S11_vo_k141_102384        | 2468  | NA  | 0  | 0  | Not-determined | Genome-fragment | NA              | 0     |       |
| S11_vo_k141_58291         | 2376  | NA  | 0  | 0  | Not-determined | Genome-fragment | NA              | 0     |       |
| S1_vo_k141_21973          | 1235  | NA  | 1  | 0  | Low-quality    | Genome-fragment | 2.58            | 0     |       |
| S7_extracted_134409       | 1235  | NA  | 0  | 0  | Low-quality    | Genome-fragment | 1.29            | 0     |       |
| S7_vo_125290              | 1235  | NA  | 0  | 0  | Low-quality    | Genome-fragment | 2.06            | 0     |       |
| S10_vo_74752              | 1235  | NA  | 0  | 0  | Low-quality    | Genome-fragment | 3.33            | 0     |       |
| S12_extracted_k141_49937  | 1235  | NA  | 1  | 0  | Low-quality    | Genome-fragment | 0.67            | 0     |       |
| S11_vo_k141_90650         | 3140  | NA  | 0  | 1  | Not-determined | Genome-fragment | NA              | 0     |       |
| S12_extracted_k141_61254  | 1235  | NA  | 0  | 0  | Low-quality    | Genome-fragment | 1.43            | 0     |       |
| S12_vo_k141_91977         | 1235  | NA  | 0  | 0  | Low-quality    | Genome-fragment | 2.82            | 0     |       |
| S12_vo_k141_93061         | 1235  | NA  | 0  | 1  | Low-quality    | Genome-fragment | 3.4             | 0     |       |
| S12_vo_k141_82246         | 1235  | NA  | 0  | 0  | Low-quality    | Genome-fragment | 3.21            | 0     |       |
| S11_vo_k141_38700         | 2384  | NA  | 0  | 2  | Not-determined | Genome-fragment | NA              | 0     |       |
| S8_vo_k141_17906          | 1235  | NA  | 0  | 1  | Low-quality    | Genome-fragment | 2.75            | 0     |       |
| S11_vo_k141_62461         | 1946  | NA  | 0  | 0  | Not-determined | Genome-fragment | NA              | 0     |       |
| S11_vo_k141_51161         | 9355  | NA  | 0  | 4  | Not-determined | Genome-fragment | NA              | 0     |       |
| S8_vo_k141_207072         | 1235  | NA  | 0  | 0  | Low-quality    | Genome-fragment | 8.55            | 0     |       |
| S11_vo_k141_70533         | 1218  | NA  | 0  | 1  | Not-determined | Genome-fragment | NA              | 0     |       |
| S11_extracted_k141_48429  | 1236  | NA  | 0  | 0  | Low-quality    | Genome-fragment | 3.31            | 0     |       |
| S11_vo_k141_86521         | 1236  | NA  | 2  | 0  | Low-quality    | Genome-fragment | 2.82            | 0     |       |
| S11_vo_k141_38773         | 3397  | NA  | 0  | 2  | Not-determined | Genome-fragment | NA              | 0     |       |
| S11_vo_k141_54642         | 1604  | NA  | 0  | 0  | Not-determined | Genome-fragment | NA              | 0     |       |
| S13_extracted_2627        | 1236  | NA  | 0  | 0  | Low-quality    | Genome-fragment | 0.77            | 0     |       |
| S11_vo_k141_64657         | 2196  | NA  | 0  | 1  | Not-determined | Genome-fragment | NA              | 0     |       |
| S13_extracted_103994      | 1236  | NA  | 0  | 0  | Low-quality    | Genome-fragment | 2.52            | 0     |       |
| S1_extracted_k141_67804   | 1236  | NA  | 0  | 1  | Low-quality    | Genome-fragment | 1.52            | 0     |       |
| S11_vo_k141_103546        | 1957  | NA  | 0  | 0  | Not-determined | Genome-fragment | NA              | 0     |       |
| S11_vo_k141_63281         | 10738 | NA  | 0  | 5  | Not-determined | Genome-fragment | NA              | 0     |       |
| S5_vo_k141_122165         | 1236  | NA  | 0  | 0  | Low-quality    | Genome-fragment | 3.61            | 0     |       |
| S11_vo_k141_84269         | 7459  | NA  | 0  | 0  | Not-determined | Genome-fragment | NA              | 0     |       |
| S11_vo_k141_54715         | 1673  | NA  | 0  | 0  | Not-determined | Genome-fragment | NA              | 0     |       |
| S7_vo_34050               | 1236  | NA  | 0  | 0  | Low-quality    | Genome-fragment | 2.13            | 0     |       |
| S16_extracted_94711       | 1236  | NA  | 0  | 0  | Low-quality    | Genome-fragment | 0.24            | 0     |       |
| S10_extracted_3306        | 1236  | NA  | 0  | 0  | Low-quality    | Genome-fragment | 2.68            | 0     |       |
| S11_vo_k141_19361         | 2505  | NA  | 0  | 1  | Not-determined | Genome-fragment | NA              | 0     |       |
| S11_vo_k141_90835         | 1818  | NA  | 0  | 1  | Not-determined | Genome-fragment | NA              | 0     |       |
| S10_extracted_50801       | 1236  | NA  | 0  | 0  | Low-quality    | Genome-fragment | 2.71            | 0     |       |
| S11_vo_k141_38860         | 39451 | NA  | 21 | 0  | High-quality   | High-quality    | 100             | 0     |       |
| S12_extracted_k141_47018  | 1236  | NA  | 0  | 0  | Low-quality    | Genome-fragment | 2.29            | 0     |       |
| S12_vo_k141_156013        | 1236  | NA  | 3  | 0  | Low-quality    | Genome-fragment | 2.96            | 0     |       |
| S11_vo_k141_32067         | 1541  | NA  | 0  | 2  | Not-determined | Genome-fragment | NA              | 0     |       |
| S11_vo_k141_51342         | 2411  | NA  | 0  | 2  | Not-determined | Genome-fragment | NA              | 0     |       |
| S12_vo_k141_86325         | 1236  | NA  | 0  | 1  | Low-quality    | Genome-fragment | 1.96            | 0     |       |
| S15_extracted_14150       | 1236  | NA  | 0  | 1  | Low-quality    | Genome-fragment | 0.82            | 0     |       |
| S8_extracted_k141_141653  | 1236  | NA  | 1  | 1  | Low-quality    | Genome-fragment | 1.4             | 0     |       |
| S8_vo_k141_124572         | 1236  | NA  | 1  | 0  | Low-quality    | Genome-fragment | 1.06            | 0     |       |
| S8_vo_k141_47209          | 1236  | NA  | 1  | 0  | Low-quality    | Genome-fragment | 2.86            | 0     |       |
| S11_vo_k141_64581         | 42936 | Yes | NA | 12 | 2              | Medium-quality  | Genome-fragment | 81.42 | 12.55 |
| S17_vo_k141_115243        | 1237  | NA  | 0  | 0  | Low-quality    | Genome-fragment | 3.07            | 0     |       |
| S11_vo_k141_103698        | 2943  | NA  | 0  | 1  | Not-determined | Genome-fragment | NA              | 0     |       |
| S17_vo_k141_41027         | 1237  | NA  | 2  | 0  | Low-quality    | Genome-fragment | 2.21            | 0     |       |
| S11_vo_k141_54528         | 1929  | NA  | 0  | 1  | Not-determined | Genome-fragment | NA              | 0     |       |
| S11_vo_k141_246           | 1237  | NA  | 2  | 0  | Low-quality    | Genome-fragment | 1.72            | 0     |       |
| S11_vo_k141_39010         | 1750  | NA  | 0  | 0  | Not-determined | Genome-fragment | NA              | 0     |       |
| S14_vo_k141_92469         | 1237  | NA  | 0  | 0  | Low-quality    | Genome-fragment | 2.68            | 0     |       |
| S11_vo_k141_70860         | 1261  | NA  | 0  | 0  | Not-determined | Genome-fragment | NA              | 0     |       |
| S3_vo_k141_37261          | 1237  | NA  | 2  | 0  | Low-quality    | Genome-fragment | 3.1             | 0     |       |
| S11_vo_k141_39036         | 5425  | NA  | 0  | 2  | Not-determined | Genome-fragment | NA              | 0     |       |
| S11_vo_k141_70895         | 3632  | NA  | 0  | 1  | Not-determined | Genome-fragment | NA              | 0     |       |
| S3_vo_k141_21529          | 1237  | NA  | 1  | 0  | Low-quality    | Genome-fragment | 2.41            | 0     |       |
| S11_vo_k141_91047         | 1917  | NA  | 0  | 2  | Not-determined | Genome-fragment | NA              | 0     |       |
| S7_vo_8737                | 1237  | NA  | 0  | 0  | Low-quality    | Genome-fragment | 3.11            | 0     |       |
| S11_vo_k141_91058         | 1866  | NA  | 0  | 2  | Not-determined | Genome-fragment | NA              | 0     |       |
| S11_vo_k141_103809        | 2276  | NA  | 0  | 1  | Not-determined | Genome-fragment | NA              | 0     |       |
| S11_vo_k141_70991         | 1237  | NA  | 0  | 1  | Not-determined | Genome-fragment | NA              | 0     |       |
| S7_vo_75987               | 1237  | NA  | 1  | 0  | Low-quality    | Genome-fragment | 2.94            | 0     |       |
| S16_extracted_70387       | 1237  | NA  | 0  | 0  | Low-quality    | Genome-fragment | 1.18            | 0     |       |
| S11_vo_k141_91106         | 5940  | NA  | 0  | 2  | Not-determined | Genome-fragment | NA              | 0     |       |
| S4_extracted_23861        | 1237  | NA  | 2  | 0  | Low-quality    | Genome-fragment | 4.07            | 0     |       |
| S11_vo_k141_32189         | 2949  | NA  | 0  | 2  | Not-determined | Genome-fragment | NA              | 0     |       |
| S14_vo_k141_45506         | 1238  | NA  | 2  | 0  | Low-quality    | Genome-fragment | 2.66            | 0     |       |
| S11_vo_k141_84480         | 1541  | NA  | 0  | 0  | Not-determined | Genome-fragment | NA              | 0     |       |
| S11_vo_k141_51614         | 1430  | NA  | 0  | 1  | Not-determined | Genome-fragment | NA              | 0     |       |
| S11_vo_k141_102885        | 1800  | NA  | 0  | 3  | Not-determined | Genome-fragment | NA              | 0     |       |
| S1_extracted_k141_135120  | 1238  | NA  | 0  | 0  | Low-quality    | Genome-fragment | NA              | 0     |       |
| S11_vo_k141_51642         | 2465  | NA  | 0  | 1  | Not-determined | Genome-fragment | NA              | 0     |       |
| S11_vo_k141_49297         | 1238  | NA  | 0  | 1  | Low-quality    | Genome-fragment | 2.4             | 0     |       |
| S1_vo_k141_148205         | 1238  | NA  | 0  | 0  | Low-quality    | Genome-fragment | 0.86            | 0     |       |
| S11_vo_k141_71085         | 1687  | NA  | 0  | 2  | Not-determined | Genome-fragment | NA              | 0     |       |
| S1_vo_k141_144137         | 1238  | NA  | 1  | 0  | Low-quality    | Genome-fragment | 0.85            | 0     |       |
| S11_vo_k141_71090         | 1326  | NA  | 0  | 1  | Not-determined | Genome-fragment | NA              | 0     |       |
| S3_extracted_k141_101749  | 1238  | NA  | 0  | 0  | Low-quality    | Genome-fragment | 0.76            | 0     |       |
| S5_extracted_k141_141965  | 1238  | NA  | 2  | 0  | Low-quality    | Genome-fragment | 2.71            | 0     |       |
| S7_vo_105515              | 1238  | NA  | 0  | 0  | Low-quality    | Genome-fragment | 2.28            | 0     |       |
| S11_vo_k141_71208         | 2112  | NA  | 0  | 1  | Not-determined | Genome-fragment | NA              | 0     |       |
| S16_extracted_43350       | 1238  | NA  | 1  | 0  | Low-quality    | Genome-fragment | 3.84            | 0     |       |
| S11_vo_k141_71262         | 2913  | NA  | 0  | 1  | Not-determined | Genome-fragment | NA              | 0     |       |
| S16_vo_33377              | 1238  | NA  | 0  | 0  | Low-quality    | Genome-fragment | 2.6             | 0     |       |
| S10_extracted_18727       | 1238  | NA  | 0  | 0  | Low-quality    | Genome-fragment | 1.65            | 0     |       |
| S11_vo_k141_24288         | 1900  | NA  | 0  | 0  | Not-determined | Genome-fragment | NA              | 0     |       |
| S12_vo_k141_178716        | 1238  | NA  | 0  | 0  | Low-quality    | Genome-fragment | 1.99            | 0     |       |
| S11_vo_k141_71365         | 1373  | NA  | 0  | 1  | Not-determined | Genome-fragment | NA              | 0     |       |
| S15_vo_12115              | 1238  | NA  | 1  | 0  | Low-quality    | Genome-fragment | 2.72            | 0     |       |
| S11_vo_k141_92442         | 15242 | NA  | 0  | 7  | Not-determined | Genome-fragment | NA              | 0     |       |
| S11_vo_k141_2527          | 10395 | NA  | 0  | 8  | Not-determined | Genome-fragment | NA              | 0     |       |
| S8_vo_k141_61814          | 1238  | NA  | 1  | 0  | Low-quality    | Genome-fragment | 2.97            | 0     |       |
| S8_vo_k141_8216           | 1238  | NA  | 0  | 0  | Low-quality    | Genome-fragment | 3.8             | 0     |       |
| S17_extracted_k141_105503 | 1239  | NA  | 0  | 0  | Low-quality    | Genome-fragment | 2.33            | 0     |       |
| S9_extracted_k141_64137   | 1239  | NA  | 0  | 1  | Low-quality    | Genome-fragment | 0.48            | 0     |       |
| S11_vo_k141_64544         | 12817 | NA  | 0  | 6  | Not-determined | Genome-fragment | NA              | 0     |       |
| S13_vo_31328              | 1239  | NA  | 0  | 0  | Low-quality    | Genome-fragment | 0.76            | 0     |       |
| S13_vo_12091              | 1239  | NA  | 1  | 0  | Low-quality    | Genome-fragment | 3.55            | 0     |       |
| S3_vo_k141_58424          | 1239  | NA  | 1  | 0  | Low-quality    | Genome-fragment | 2.63            | 0     |       |
| S5_vo_k141_66204          | 1239  | NA  | 0  | 0  | Low-quality    | Genome-fragment | 2.4             |       |       |



|                           |          |          |    |    |                |                    |       |   |
|---------------------------|----------|----------|----|----|----------------|--------------------|-------|---|
| S5_extracted_k141_89611   | 1240 No  | NA       | 0  | 1  | Low-quality    | Genome-fragment    | 3.17  | 0 |
| S12_extracted_k141_49159  | 1240 No  | NA       | 1  | 0  | Low-quality    | Genome-fragment    | 2.75  | 0 |
| S15_extracted_72823       | 1240 No  | NA       | 0  | 1  | Low-quality    | Genome-fragment    | 0.7   | 0 |
| S2_extracted_k141_16713   | 1240 No  | NA       | 2  | 0  | Low-quality    | Genome-fragment    | 4.09  | 0 |
| S8_extracted_k141_70924   | 1240 No  | NA       | 0  | 2  | Low-quality    | Genome-fragment    | 3.96  | 0 |
| S13_vs_k141_130515  full  | 1241 No  | NA       | 1  | 0  | Low-quality    | Genome-fragment    | 0.8   | 0 |
| S11_vs_k141_79633  l2gene | 2239 No  | NA       | 0  | 0  | Not-determined | Genome-fragment NA | 0     | 0 |
| S14_extracted_k141_86540  | 1241 No  | NA       | 1  | 0  | Low-quality    | Genome-fragment    | 1.56  | 0 |
| S16_extracted_28551       | 1241 No  | NA       | 0  | 0  | Low-quality    | Genome-fragment    | 2.79  | 0 |
| S16_vs_18703  full        | 1241 No  | NA       | 0  | 1  | Low-quality    | Genome-fragment    | 2.01  | 0 |
| S10_extracted_5422        | 1241 No  | NA       | 2  | 0  | Low-quality    | Genome-fragment    | 3.18  | 0 |
| S12_vs_k141_42601  full   | 1241 No  | NA       | 0  | 0  | Low-quality    | Genome-fragment    | 3.05  | 0 |
| S8_vs_k141_165190  full   | 1241 No  | NA       | 1  | 0  | Low-quality    | Genome-fragment    | 0.8   | 0 |
| S11_extracted_k141_79420  | 1242 No  | NA       | 0  | 2  | Low-quality    | Genome-fragment    | 2.77  | 0 |
| S11_vs_k141_58174  full   | 1242 No  | NA       | 0  | 0  | Low-quality    | Genome-fragment    | 3.08  | 0 |
| S11_vs_k141_54000  l2gene | 1170 No  | NA       | 0  | 0  | Not-determined | Genome-fragment NA | 0     | 0 |
| S11_vs_k141_8425  l2gene  | 1104 No  | NA       | 0  | 0  | Not-determined | Genome-fragment NA | 0     | 0 |
| S14_vs_k141_23890  full   | 1242 No  | NA       | 0  | 0  | Low-quality    | Genome-fragment    | 2.36  | 0 |
| S14_k141_18459  full      | 1242 No  | NA       | 0  | 0  | Low-quality    | Genome-fragment    | 1.48  | 0 |
| S14_vs_k141_55003  full   | 1242 No  | NA       | 0  | 0  | Low-quality    | Genome-fragment    | 3.18  | 0 |
| S14_vs_k141_55608  l2gene | 1242 No  | NA       | 2  | 0  | Low-quality    | Genome-fragment    | 3.68  | 0 |
| S3_extracted_k141_70218   | 1242 No  | NA       | 1  | 0  | Low-quality    | Genome-fragment    | 3.14  | 0 |
| S5_vs_k141_126040  full   | 1242 No  | NA       | 0  | 0  | Low-quality    | Genome-fragment    | 2.07  | 0 |
| S5_vs_k141_53769  full    | 1242 No  | NA       | 1  | 0  | Low-quality    | Genome-fragment    | 2.25  | 0 |
| S11_vs_k141_87588  l2gene | 2836 No  | NA       | 0  | 0  | Not-determined | Genome-fragment NA | 0     | 0 |
| S11_vs_k141_80521  l2gene | 1323 No  | NA       | 0  | 0  | Not-determined | Genome-fragment NA | 0     | 0 |
| S5_vs_k141_50774  l2gene  | 1242 No  | NA       | 1  | 0  | Low-quality    | Genome-fragment    | 1.81  | 0 |
| S7_extracted_119757       | 1242 No  | NA       | 0  | 1  | Low-quality    | Genome-fragment    | 0.48  | 0 |
| S7_vs_23029  full         | 1242 No  | NA       | 0  | 0  | Low-quality    | Genome-fragment    | 2.91  | 0 |
| S16_extracted_84914       | 1242 No  | NA       | 0  | 0  | Low-quality    | Genome-fragment    | 5.1   | 0 |
| S12_vs_k141_131199  full  | 1242 No  | NA       | 1  | 0  | Low-quality    | Genome-fragment    | 0.67  | 0 |
| S8_vs_k141_116731  full   | 1242 No  | NA       | 0  | 0  | Low-quality    | Genome-fragment    | 2.08  | 0 |
| S8_vs_k141_50089  full    | 1242 No  | NA       | 3  | 0  | Low-quality    | Genome-fragment    | 3.12  | 0 |
| S11_vs_k141_28987  l2gene | 2732 No  | NA       | 0  | 1  | Not-determined | Genome-fragment NA | 0     | 0 |
| S17_vs_k141_87837  l2gene | 1243 No  | NA       | 0  | 0  | Low-quality    | Genome-fragment    | 2.4   | 0 |
| S11_vs_k141_65342  full   | 1243 No  | NA       | 0  | 0  | Low-quality    | Genome-fragment    | 3.71  | 0 |
| S13_vs_8351  full         | 1243 No  | NA       | 0  | 0  | Low-quality    | Genome-fragment    | 2.95  | 0 |
| S14_extracted_k141_5373   | 1243 No  | NA       | 1  | 0  | Low-quality    | Genome-fragment    | 7.35  | 0 |
| S14_vs_k141_56814  full   | 1243 No  | NA       | 0  | 0  | Low-quality    | Genome-fragment    | 0.18  | 0 |
| S5_vs_k141_120462  full   | 1243 No  | NA       | 1  | 0  | Low-quality    | Genome-fragment    | 0.53  | 0 |
| S16_extracted_105999      | 1243 No  | NA       | 0  | 0  | Low-quality    | Genome-fragment    | 0.9   | 0 |
| S16_vs_123140  l2gene     | 1243 No  | NA       | 0  | 0  | Low-quality    | Genome-fragment    | 1.68  | 0 |
| S15_vs_35113  full        | 1243 No  | NA       | 0  | 0  | Low-quality    | Genome-fragment    | 2.24  | 0 |
| S11_vs_k141_29797  l2gene | 2426 No  | NA       | 0  | 1  | Not-determined | Genome-fragment NA | 0     | 0 |
| S15_vs_29426  l2gene      | 1243 No  | NA       | 1  | 0  | Low-quality    | Genome-fragment    | 0.62  | 0 |
| S11_vs_k141_49195  l2gene | 1383 No  | NA       | 2  | 0  | Not-determined | Genome-fragment NA | 0     | 0 |
| S11_vs_k141_49235  l2gene | 1583 No  | NA       | 0  | 1  | Not-determined | Genome-fragment NA | 0     | 0 |
| S11_vs_k141_49323  l2gene | 1202 No  | NA       | 0  | 0  | Not-determined | Genome-fragment NA | 0     | 0 |
| S2_vs_k141_10117  full    | 1243 No  | NA       | 0  | 0  | Low-quality    | Genome-fragment    | 2.99  | 0 |
| S8_extracted_k141_3969    | 1243 No  | NA       | 0  | 0  | Low-quality    | Genome-fragment    | 2.89  | 0 |
| S8_extracted_k141_111184  | 1243 No  | NA       | 1  | 0  | Low-quality    | Genome-fragment    | 2.99  | 0 |
| S8_vs_k141_188628  l2gene | 1243 No  | NA       | 0  | 0  | Low-quality    | Genome-fragment    | 2.27  | 0 |
| S7_extracted_k141_123545  | 1244 No  | NA       | 0  | 1  | Low-quality    | Genome-fragment    | 2.17  | 0 |
| S9_extracted_k141_44224   | 1244 No  | NA       | 0  | 0  | Low-quality    | Genome-fragment    | 1.9   | 0 |
| S11_extracted_k141_84125  | 1244 No  | NA       | 2  | 0  | Low-quality    | Genome-fragment    | 3.07  | 0 |
| S11_vs_k141_68876  full   | 1244 No  | NA       | 0  | 0  | Low-quality    | Genome-fragment    | 1.11  | 0 |
| S11_vs_k141_30788  full   | 1244 No  | NA       | 0  | 0  | Low-quality    | Genome-fragment    | 2.71  | 0 |
| S11_vs_k141_49946  l2gene | 1267 No  | NA       | 0  | 0  | Not-determined | Genome-fragment NA | 0     | 0 |
| S11_k141_51127  full      | 1244 No  | NA       | 0  | 0  | Low-quality    | Genome-fragment    | 0.63  | 0 |
| S13_extracted_86527       | 1244 No  | NA       | 0  | 1  | Low-quality    | Genome-fragment    | 0.12  | 0 |
| S1_extracted_k141_60162   | 1244 No  | NA       | 1  | 0  | Low-quality    | Genome-fragment    | 2.83  | 0 |
| S1_extracted_k141_20340   | 1244 No  | NA       | 1  | 0  | Low-quality    | Genome-fragment    | 0.81  | 0 |
| S11_vs_k141_37902  l2gene | 1084 No  | NA       | 0  | 0  | Not-determined | Genome-fragment NA | 0     | 0 |
| S3_extracted_k141_55295   | 1244 No  | NA       | 0  | 0  | Low-quality    | Genome-fragment    | 1.51  | 0 |
| S5_vs_k141_29198  l2gene  | 1244 No  | NA       | 0  | 0  | Low-quality    | Genome-fragment    | 1.84  | 0 |
| S7_vs_20888  full         | 1244 No  | NA       | 1  | 0  | Low-quality    | Genome-fragment    | 2.65  | 0 |
| S7_vs_6651  l2gene        | 1244 No  | NA       | 1  | 0  | Low-quality    | Genome-fragment    | 3.62  | 0 |
| S16_vs_148696  l2gene     | 1244 No  | NA       | 1  | 0  | Low-quality    | Genome-fragment    | 3.27  | 0 |
| S17_extracted_k141_115320 | 1245 No  | NA       | 0  | 0  | Low-quality    | Genome-fragment    | 1.68  | 0 |
| S17_vs_k141_164283  full  | 1245 No  | NA       | 2  | 0  | Low-quality    | Genome-fragment    | 2.8   | 0 |
| S17_vs_k141_124979  full  | 1245 No  | NA       | 0  | 3  | Low-quality    | Genome-fragment    | 0.51  | 0 |
| S11_extracted_k141_6578   | 1245 No  | NA       | 0  | 0  | Low-quality    | Genome-fragment    | 0.48  | 0 |
| S11_vs_k141_103736  full  | 1245 No  | NA       | 0  | 0  | Low-quality    | Genome-fragment    | 3.13  | 0 |
| S14_vs_k141_88706  full   | 1245 No  | NA       | 0  | 0  | Low-quality    | Genome-fragment    | 2.51  | 0 |
| S14_vs_k141_14394  full   | 1245 No  | NA       | 0  | 0  | Low-quality    | Genome-fragment    | 2.38  | 0 |
| S1_vs_k141_81243  full    | 1245 No  | NA       | 0  | 2  | Low-quality    | Genome-fragment    | 1.69  | 0 |
| S11_vs_k141_38829  l2gene | 1137 No  | NA       | 0  | 0  | Not-determined | Genome-fragment NA | 0     | 0 |
| S3_vs_k141_11953  full    | 1245 No  | NA       | 2  | 0  | Low-quality    | Genome-fragment    | 2.68  | 0 |
| S3_vs_k141_54117  full    | 1245 No  | NA       | 0  | 0  | Low-quality    | Genome-fragment    | 2.58  | 0 |
| S5_extracted_k141_115611  | 1245 No  | NA       | 1  | 0  | Low-quality    | Genome-fragment    | 2.3   | 0 |
| S5_extracted_k141_115611  | 1245 No  | NA       | 1  | 0  | Low-quality    | Genome-fragment    | 0.95  | 0 |
| S11_vs_k141_51732  l2gene | 1672 No  | NA       | 0  | 0  | Not-determined | Genome-fragment NA | 0     | 0 |
| S11_vs_k141_32329  l2gene | 1050 No  | NA       | 0  | 0  | Not-determined | Genome-fragment NA | 0     | 0 |
| S5_vs_k141_135196  full   | 1245 No  | NA       | 0  | 1  | Low-quality    | Genome-fragment    | 2.34  | 0 |
| S5_vs_k141_85335  l2gene  | 1245 No  | NA       | 0  | 0  | Low-quality    | Genome-fragment    | 2.18  | 0 |
| S7_extracted_7544         | 1245 No  | NA       | 1  | 0  | Low-quality    | Genome-fragment    | 2.34  | 0 |
| S13_extracted_601         | 1023 No  | NA       | 0  | 2  | Not-determined | Genome-fragment NA | 0     | 0 |
| S13_extracted_712         | 1156 No  | NA       | 0  | 0  | Not-determined | Genome-fragment NA | 0     | 0 |
| S13_extracted_758         | 1342 No  | NA       | 0  | 1  | Not-determined | Genome-fragment NA | 0     | 0 |
| S7_extracted_9316         | 1245 No  | NA       | 0  | 0  | Low-quality    | Genome-fragment    | 0.28  | 0 |
| S7_extracted_81635        | 1245 No  | NA       | 0  | 1  | Low-quality    | Genome-fragment    | 4.15  | 0 |
| S13_extracted_966         | 1345 No  | NA       | 0  | 0  | Not-determined | Genome-fragment NA | 0     | 0 |
| S13_extracted_1137        | 1045 No  | NA       | 0  | 0  | Not-determined | Genome-fragment NA | 0     | 0 |
| S6_vs_k141_12459  full    | 1245 No  | NA       | 0  | 2  | Low-quality    | Genome-fragment    | 2.77  | 0 |
| S13_extracted_1546        | 1311 No  | NA       | 0  | 1  | Not-determined | Genome-fragment NA | 0     | 0 |
| S13_extracted_1750        | 1789 No  | NA       | 0  | 2  | Not-determined | Genome-fragment NA | 0     | 0 |
| S13_extracted_1770        | 12617 No | NA       | 4  | 0  | High-quality   | High-quality       | 100   | 0 |
| S13_extracted_1820        | 1432 No  | NA       | 0  | 0  | Not-determined | Genome-fragment NA | 0     | 0 |
| S13_extracted_2054        | 1251 No  | NA       | 0  | 0  | Not-determined | Genome-fragment NA | 0     | 0 |
| S13_extracted_2135        | 1182 No  | NA       | 0  | 1  | Not-determined | Genome-fragment NA | 0     | 0 |
| S13_extracted_2158        | 1144 No  | NA       | 0  | 0  | Not-determined | Genome-fragment NA | 0     | 0 |
| S13_extracted_2229        | 1317 No  | NA       | 0  | 0  | Not-determined | Genome-fragment NA | 0     | 0 |
| S17_extracted_k141_176089 | 1246 No  | NA       | 1  | 0  | Low-quality    | Genome-fragment    | 2.28  | 0 |
| S13_extracted_2348        | 2157 No  | NA       | 0  | 0  | Not-determined | Genome-fragment NA | 0     | 0 |
| S13_extracted_2436        | 2073 No  | NA       | 0  | 1  | Not-determined | Genome-fragment NA | 0     | 0 |
| S13_extracted_2463        | 2074 No  | NA       | 0  | 0  | Not-determined | Genome-fragment NA | 0     | 0 |
| S13_extracted_2522        | 3804 No  | NA       | 0  | 1  | Not-determined | Genome-fragment NA | 0     | 0 |
| S13_extracted_2524        | 15055 No | NA       | 0  | 10 | Not-determined | Genome-fragment NA | 0     | 0 |
| S17_vs_k141_102707  full  | 1246 No  | NA       | 0  | 0  | Low-quality    | Genome-fragment    | 0.86  | 0 |
| S13_extracted_2772        | 2651 No  | NA       | 0  | 6  | Not-determined | Genome-fragment NA | 0     | 0 |
| S13_extracted_3092        | 2021 No  | NA       | 0  | 2  | Not-determined | Genome-fragment NA | 0     | 0 |
| S13_extracted_3140        | 1386 No  | NA       | 0  | 1  | Not-determined | Genome-fragment NA | 0     | 0 |
| S13_extracted_3645        | 3970 No  | NA       | 0  | 5  | Not-determined | Genome-fragment NA | 0     | 0 |
| S13_extracted_3728        | 93098 No | NA       | 6  | 0  | Complete       | High-quality       | 100   | 0 |
| S13_extracted_3819        | 1139 No  | NA       | 0  | 1  | Not-determined | Genome-fragment NA | 0     | 0 |
| S13_extracted_3860        | 1467 No  | NA       | 0  | 1  | Not-determined | Genome-fragment NA | 0     | 0 |
| S13_extracted_4181        | 3410 No  | NA       | 0  | 1  | Not-determined | Genome-fragment NA | 0     | 0 |
| S14_vs_k141_16362  l2gene | 1246 No  | NA       | 0  | 0  | Low-quality    | Genome-fragment    | 1.86  | 0 |
| S13_extracted_4314        | 3653 No  | NA       | 0  | 1  | Not-determined | Genome-fragment NA | 0     | 0 |
| S13_extracted_4416        | 3047 No  | NA       | 0  | 1  | Not-determined | Genome-fragment NA | 0     | 0 |
| S13_extracted_4553        | 1049 No  | NA       | 0  | 1  | Not-determined | Genome-fragment NA | 0     | 0 |
| S13_extracted_4598        | 4754 No  | NA       | 0  | 1  | Not-determined | Genome-fragment NA | 0     | 0 |
| S13_extracted_4610        | 9974 No  | NA       | 0  | 6  | Not-determined | Genome-fragment NA | 0     | 0 |
| S13_extracted_4717        | 1117 No  | NA       | 0  | 1  | Not-determined | Genome-fragment NA | 0     | 0 |
| S13_extracted_4752        | 14343 No | NA       | 0  | 4  | Not-determined | Genome-fragment NA | 0     | 0 |
| S13_extracted_4771        | 1189 No  | NA       | 0  | 0  | Not-determined | Genome-fragment NA | 0     | 0 |
| S13_extracted_4798        | 1117 No  | NA       | 0  | 1  | Not-determined | Genome-fragment NA | 0     | 0 |
| S13_extracted_4811        | 1116 No  | NA       | 0  | 0  | Not-determined | Genome-fragment NA | 0     | 0 |
| S13_extracted_4901        | 95651 No | NA       | 20 | 3  | Medium-quality | Genome-fragment    | 70.74 | 0 |
| S3_extracted_k141_19519   | 1246 No  | NA       | 2  | 0  | Low-quality    | Genome-fragment    | 2.24  | 0 |
| S13_extracted_5117        | 1707 No  | NA       | 0  | 2  | Not-determined | Genome-fragment NA | 0     | 0 |
| S13_extracted_5203        | 1443 No  | NA       | 0  | 0  | Not-determined | Genome-fragment NA | 0     | 0 |
| S13_extracted_5273        | 1032 No  | NA       | 0  | 0  | Not-determined | Genome-fragment NA | 0     | 0 |
| S13_extracted_5409        | 1020 No  | NA       | 0  | 1  | Not-determined | Genome-fragment NA | 0     | 0 |
| S5_vs_k141_142076  full   | 1246 No  | NA       | 1  | 0  | Low-quality    | Genome-fragment    | 2.69  | 0 |
| S13_extracted_5726        | 1048 No  | NA       | 0  | 0  | Not-determined | Genome-fragment NA | 0     | 0 |
| S13_extracted_5768        | 1337 No  | NA       | 0  | 0  | Not-determined | Genome-fragment NA | 0     | 0 |
| S13_extracted_5905        | 5593 No  | NA       | 0  | 1  | Not-determined | Genome-fragment NA | 0     | 0 |
| S13_extracted_5977        | 2307 No  | NA       | 0  | 1  | Not-determined | Genome-fragment NA | 0     | 0 |
| S13_extracted_6036        | 1061 No  | NA       | 0  | 1  | Not-determined | Genome-fragment NA | 0     | 0 |
| S13_extracted_6085        | 1826 No  | NA       | 0  | 1  | Not-determined | Genome-fragment NA | 0     | 0 |
| S13_extracted_6387        | 1041 No  | NA       | 0  | 1  | Not-determined | Genome-fragment NA | 0     | 0 |
| S7_vs_12884  full         | 1246 No  | NA       | 0  | 0  | Low-quality    | Genome-fragment    | 2.4   | 0 |
| S13_extracted_6782        | 1179 No  | NA       | 0  | 2  | Not-determined | Genome-fragment NA | 0     | 0 |
| S13_extracted_6940        | 2153 No  | NA       | 0  | 0  | Not-determined | Genome-fragment NA | 0     | 0 |
| S13_extracted_6962        | 4397 No  | NA       | 0  | 3  | Not-determined | Genome-fragment NA | 0     | 0 |
| S13_extracted_7323        | 3586 No  | NA       | 0  | 2  | Not-determined | Genome-fragment NA | 0     | 0 |
| S7_vs_117405  full        | 1246 No  | NA       | 0  | 0  | Low-quality    | Genome-fragment    | 2.9   | 0 |
| S13_extracted_7588        | 1201 No  | NA       | 0  | 0  | Not-determined | Genome-fragment NA | 0     | 0 |
| S13_extracted_7604        | 1293 No  | NA       | 0  | 1  | Not-determined | Genome-fragment NA | 0     | 0 |
| S13_extracted_7636        | 5307 No  | NA       | 0  | 1  | Not-determined | Genome-fragment NA | 0     | 0 |
| S13_extracted_7670        | 8        | 67724 No | NA | 0  | High-quality   | High-quality       | 96.7  | 0 |
| S13_extracted_7728        | 1122 No  | NA       | 0  | 1  | Not-determined | Genome-fragment NA | 0     | 0 |
| S13_extracted_7780        | 1        |          |    |    |                |                    |       |   |



|                           |       |    |    |    |    |                |                 |    |      |
|---------------------------|-------|----|----|----|----|----------------|-----------------|----|------|
| S13_extracted_9170        | 1383  | No | NA | 0  | 0  | Not-determined | Genome-fragment | NA | 0    |
| S13_extracted_9194        | 1245  | No | NA | 0  | 1  | Not-determined | Genome-fragment | NA | 0    |
| S13_extracted_9196        | 2045  | No | NA | 0  | 0  | Not-determined | Genome-fragment | NA | 0    |
| S13_extracted_9324        | 1023  | No | NA | 0  | 1  | Not-determined | Genome-fragment | NA | 0    |
| S13_extracted_9372        | 1081  | No | NA | 0  | 0  | Not-determined | Genome-fragment | NA | 0    |
| S12_vs_k141_167371[full]  | 1246  | No | NA | 0  | 2  | Low-quality    | Genome-fragment | NA | 1.18 |
| S13_extracted_9429        | 1767  | No | NA | 0  | 0  | Not-determined | Genome-fragment | NA | 0    |
| S13_extracted_9537        | 1150  | No | NA | 0  | 1  | Not-determined | Genome-fragment | NA | 0    |
| S13_extracted_9545        | 1184  | No | NA | 0  | 1  | Not-determined | Genome-fragment | NA | 0    |
| S13_extracted_9648        | 1730  | No | NA | 0  | 1  | Not-determined | Genome-fragment | NA | 0    |
| S13_extracted_9811        | 1154  | No | NA | 0  | 0  | Not-determined | Genome-fragment | NA | 0    |
| S13_extracted_9884        | 1566  | No | NA | 0  | 1  | Not-determined | Genome-fragment | NA | 0    |
| S15_vs_76957[full]        | 1246  | No | NA | 0  | 0  | Low-quality    | Genome-fragment | NA | 3.23 |
| S13_extracted_9993        | 1156  | No | NA | 0  | 2  | Not-determined | Genome-fragment | NA | 0    |
| S13_extracted_10119       | 1010  | No | NA | 0  | 2  | Not-determined | Genome-fragment | NA | 0    |
| S13_extracted_10137       | 1786  | No | NA | 0  | 17 | Not-determined | Genome-fragment | NA | 0    |
| S6_vs_k141_38699[full]    | 1246  | No | NA | 1  | 0  | Low-quality    | Genome-fragment | NA | 2.05 |
| S13_extracted_10480       | 1994  | No | NA | 0  | 1  | Not-determined | Genome-fragment | NA | 0    |
| S8_extracted_k141_1122770 | 1246  | No | NA | 0  | 1  | Low-quality    | Genome-fragment | NA | 0.38 |
| S13_extracted_10557       | 1568  | No | NA | 0  | 0  | Not-determined | Genome-fragment | NA | 0    |
| S8_vs_k141_173478[full]   | 1246  | No | NA | 1  | 0  | Low-quality    | Genome-fragment | NA | 2.87 |
| S9_vs_k141_56843[full]    | 1247  | No | NA | 0  | 2  | Low-quality    | Genome-fragment | NA | 2.95 |
| S13_extracted_10620       | 1190  | No | NA | 0  | 2  | Not-determined | Genome-fragment | NA | 0    |
| S13_extracted_10715       | 1349  | No | NA | 0  | 1  | Not-determined | Genome-fragment | NA | 0    |
| S13_extracted_10839       | 1907  | No | NA | 0  | 2  | Not-determined | Genome-fragment | NA | 0    |
| S9_vs_k141_47260[full]    | 1247  | No | NA | 0  | 0  | Low-quality    | Genome-fragment | NA | 2.45 |
| S13_extracted_11193       | 1715  | No | NA | 0  | 2  | Not-determined | Genome-fragment | NA | 0    |
| S13_extracted_11246       | 97342 | No | NA | 15 | 2  | Complete       | High-quality    | NA | 100  |
| S13_extracted_11216       | 1263  | No | NA | 0  | 1  | Not-determined | Genome-fragment | NA | 0    |
| S9_vs_k141_21080[full]    | 1247  | No | NA | 1  | 0  | Low-quality    | Genome-fragment | NA | 3.36 |
| S13_extracted_11639       | 1329  | No | NA | 0  | 1  | Not-determined | Genome-fragment | NA | 0    |
| S14_extracted_k141_55813  | 1247  | No | NA | 0  | 0  | Low-quality    | Genome-fragment | NA | 3.12 |
| S13_extracted_11763       | 2640  | No | NA | 0  | 3  | Not-determined | Genome-fragment | NA | 0    |
| S13_extracted_11877       | 3266  | No | NA | 0  | 1  | Not-determined | Genome-fragment | NA | 0    |
| S14_vs_k141_33797[full]   | 1247  | No | NA | 1  | 0  | Low-quality    | Genome-fragment | NA | 2.22 |
| S14_vs_k141_13391[full]   | 1247  | No | NA | 0  | 0  | Low-quality    | Genome-fragment | NA | 2.92 |
| S13_extracted_12007       | 1036  | No | NA | 0  | 0  | Not-determined | Genome-fragment | NA | 0    |
| S13_extracted_12080       | 1299  | No | NA | 0  | 2  | Not-determined | Genome-fragment | NA | 0    |
| S13_extracted_12088       | 2311  | No | NA | 0  | 0  | Not-determined | Genome-fragment | NA | 0    |
| S5_vs_k141_9564[full]     | 1247  | No | NA | 0  | 0  | Low-quality    | Genome-fragment | NA | 2.94 |
| S13_extracted_12447       | 1468  | No | NA | 0  | 0  | Not-determined | Genome-fragment | NA | 0    |
| S13_extracted_12589       | 1046  | No | NA | 0  | 1  | Not-determined | Genome-fragment | NA | 0    |
| S13_extracted_12623       | 1017  | No | NA | 0  | 1  | Not-determined | Genome-fragment | NA | 0    |
| S13_extracted_12796       | 1198  | No | NA | 0  | 2  | Not-determined | Genome-fragment | NA | 0    |
| S13_extracted_12862       | 1241  | No | NA | 0  | 2  | Not-determined | Genome-fragment | NA | 0    |
| S13_extracted_13010       | 1425  | No | NA | 0  | 1  | Not-determined | Genome-fragment | NA | 0    |
| S5_vs_k141_65089[full]    | 1247  | No | NA | 0  | 0  | Low-quality    | Genome-fragment | NA | 2.17 |
| S13_extracted_13219       | 1050  | No | NA | 0  | 0  | Not-determined | Genome-fragment | NA | 0    |
| S13_extracted_13245       | 1947  | No | NA | 0  | 0  | Not-determined | Genome-fragment | NA | 0    |
| S13_extracted_13537       | 1309  | No | NA | 0  | 2  | Not-determined | Genome-fragment | NA | 0    |
| S13_extracted_13607       | 1565  | No | NA | 0  | 0  | Not-determined | Genome-fragment | NA | 0    |
| S13_extracted_13729       | 2211  | No | NA | 0  | 1  | Not-determined | Genome-fragment | NA | 0    |
| S13_extracted_13949       | 2626  | No | NA | 0  | 1  | Not-determined | Genome-fragment | NA | 0    |
| S13_extracted_14074       | 1873  | No | NA | 0  | 0  | Not-determined | Genome-fragment | NA | 0    |
| S5_vs_k141_60458[full]    | 1247  | No | NA | 2  | 0  | Low-quality    | Genome-fragment | NA | 2.78 |
| S13_extracted_14328       | 1189  | No | NA | 0  | 0  | Not-determined | Genome-fragment | NA | 0    |
| S7_extracted_103359       | 1247  | No | NA | 0  | 0  | Low-quality    | Genome-fragment | NA | 1.82 |
| S7_vs_88133[full]         | 1247  | No | NA | 1  | 0  | Low-quality    | Genome-fragment | NA | 0.71 |
| S16_vs_25467[full]        | 1247  | No | NA | 0  | 2  | Low-quality    | Genome-fragment | NA | 0.67 |
| S13_extracted_14765       | 2005  | No | NA | 0  | 1  | Not-determined | Genome-fragment | NA | 0    |
| S16_vs_77497[full]        | 1247  | No | NA | 0  | 0  | Low-quality    | Genome-fragment | NA | 1.48 |
| S13_extracted_14929       | 1076  | No | NA | 0  | 0  | Not-determined | Genome-fragment | NA | 0    |
| S12_vs_k141_183487[full]  | 1247  | No | NA | 1  | 0  | Low-quality    | Genome-fragment | NA | 2.91 |
| S13_extracted_15054       | 2783  | No | NA | 0  | 0  | Not-determined | Genome-fragment | NA | 0    |
| S13_extracted_15194       | 3033  | No | NA | 0  | 6  | Not-determined | Genome-fragment | NA | 0    |
| S6_vs_k141_52358[full]    | 1247  | No | NA | 0  | 0  | Low-quality    | Genome-fragment | NA | 3.28 |
| S13_extracted_15300       | 1773  | No | NA | 0  | 1  | Not-determined | Genome-fragment | NA | 0    |
| S13_extracted_15353       | 1314  | No | NA | 0  | 2  | Not-determined | Genome-fragment | NA | 0    |
| S13_extracted_15426       | 1501  | No | NA | 0  | 0  | Not-determined | Genome-fragment | NA | 0    |
| S13_extracted_15463       | 1776  | No | NA | 0  | 2  | Not-determined | Genome-fragment | NA | 0    |
| S8_extracted_k141_18612   | 1247  | No | NA | 0  | 1  | Low-quality    | Genome-fragment | NA | 3.98 |
| S13_extracted_15684       | 1439  | No | NA | 0  | 1  | Not-determined | Genome-fragment | NA | 0    |
| S13_extracted_15729       | 1058  | No | NA | 0  | 1  | Not-determined | Genome-fragment | NA | 0    |
| S13_extracted_15817       | 2390  | No | NA | 0  | 0  | Not-determined | Genome-fragment | NA | 0    |
| S13_extracted_15910       | 1203  | No | NA | 0  | 1  | Not-determined | Genome-fragment | NA | 0    |
| S13_extracted_16030       | 1324  | No | NA | 0  | 1  | Not-determined | Genome-fragment | NA | 0    |
| S13_extracted_16073       | 1239  | No | NA | 0  | 1  | Not-determined | Genome-fragment | NA | 0    |
| S13_extracted_16144       | 1175  | No | NA | 0  | 1  | Not-determined | Genome-fragment | NA | 0    |
| S13_extracted_16281       | 1719  | No | NA | 0  | 0  | Not-determined | Genome-fragment | NA | 0    |
| S13_extracted_16327       | 1255  | No | NA | 0  | 0  | Not-determined | Genome-fragment | NA | 0    |
| S13_extracted_16419       | 1063  | No | NA | 0  | 0  | Not-determined | Genome-fragment | NA | 0    |
| S13_extracted_16719       | 1754  | No | NA | 0  | 1  | Not-determined | Genome-fragment | NA | 0    |
| S13_extracted_16913       | 1375  | No | NA | 0  | 1  | Not-determined | Genome-fragment | NA | 0    |
| S13_extracted_17085       | 1096  | No | NA | 0  | 1  | Not-determined | Genome-fragment | NA | 0    |
| S13_extracted_17099       | 1021  | No | NA | 0  | 1  | Not-determined | Genome-fragment | NA | 0    |
| S8_extracted_k141_197950  | 1247  | No | NA | 0  | 0  | Low-quality    | Genome-fragment | NA | 3.84 |
| S13_extracted_17191       | 2180  | No | NA | 0  | 2  | Not-determined | Genome-fragment | NA | 0    |
| S13_extracted_17355       | 2178  | No | NA | 0  | 0  | Not-determined | Genome-fragment | NA | 0    |
| S13_extracted_17422       | 5395  | No | NA | 0  | 2  | Not-determined | Genome-fragment | NA | 0    |
| S17_vs_k141_133632[full]  | 1248  | No | NA | 1  | 0  | Low-quality    | Genome-fragment | NA | 1.91 |
| S13_extracted_17699       | 1058  | No | NA | 0  | 1  | Not-determined | Genome-fragment | NA | 0    |
| S13_extracted_17733       | 2216  | No | NA | 0  | 1  | Not-determined | Genome-fragment | NA | 0    |
| S13_extracted_17833       | 4738  | No | NA | 0  | 4  | Not-determined | Genome-fragment | NA | 0    |
| S13_extracted_17878       | 1123  | No | NA | 0  | 1  | Not-determined | Genome-fragment | NA | 0    |
| S13_extracted_17981       | 1061  | No | NA | 0  | 0  | Not-determined | Genome-fragment | NA | 0    |
| S9_vs_k141_21094[full]    | 1248  | No | NA | 0  | 0  | Low-quality    | Genome-fragment | NA | 2.41 |
| S13_extracted_18325       | 1525  | No | NA | 0  | 2  | Not-determined | Genome-fragment | NA | 0    |
| S13_extracted_18384       | 1255  | No | NA | 0  | 1  | Not-determined | Genome-fragment | NA | 0    |
| S13_extracted_18461       | 1187  | No | NA | 0  | 1  | Not-determined | Genome-fragment | NA | 0    |
| S13_extracted_18564       | 1230  | No | NA | 0  | 1  | Not-determined | Genome-fragment | NA | 0    |
| S13_extracted_18606       | 1240  | No | NA | 0  | 1  | Not-determined | Genome-fragment | NA | 0    |
| S9_vs_k141_61512[full]    | 1248  | No | NA | 0  | 0  | Low-quality    | Genome-fragment | NA | 2.81 |
| S13_extracted_18724       | 3333  | No | NA | 0  | 1  | Not-determined | Genome-fragment | NA | 0    |
| S13_extracted_18811       | 1607  | No | NA | 0  | 2  | Not-determined | Genome-fragment | NA | 0    |
| S13_extracted_18863       | 1418  | No | NA | 0  | 1  | Not-determined | Genome-fragment | NA | 0    |
| S14_vs_k141_31350[full]   | 1248  | No | NA | 0  | 0  | Low-quality    | Genome-fragment | NA | 2.58 |
| S13_extracted_19021       | 1130  | No | NA | 0  | 1  | Not-determined | Genome-fragment | NA | 0    |
| S13_extracted_19051       | 1677  | No | NA | 0  | 2  | Not-determined | Genome-fragment | NA | 0    |
| S13_extracted_19114       | 4320  | No | NA | 0  | 3  | Not-determined | Genome-fragment | NA | 0    |
| S13_extracted_19187       | 2371  | No | NA | 0  | 0  | Not-determined | Genome-fragment | NA | 0    |
| S13_extracted_19236       | 1243  | No | NA | 0  | 2  | Not-determined | Genome-fragment | NA | 0    |
| S13_extracted_19243       | 4864  | No | NA | 0  | 3  | Not-determined | Genome-fragment | NA | 0    |
| S13_extracted_19343       | 4820  | No | NA | 0  | 0  | Not-determined | Genome-fragment | NA | 0    |
| S13_extracted_19414       | 1460  | No | NA | 0  | 0  | Not-determined | Genome-fragment | NA | 0    |
| S14_vs_k141_10823[full]   | 1248  | No | NA | 0  | 1  | Low-quality    | Genome-fragment | NA | 1.61 |
| S13_extracted_19586       | 1573  | No | NA | 0  | 0  | Not-determined | Genome-fragment | NA | 0    |
| S13_extracted_19630       | 1595  | No | NA | 0  | 2  | Not-determined | Genome-fragment | NA | 0    |
| S13_extracted_19625       | 1031  | No | NA | 0  | 1  | Not-determined | Genome-fragment | NA | 0    |
| S13_extracted_20386       | 3735  | No | NA | 0  | 0  | Not-determined | Genome-fragment | NA | 0    |
| S1_vs_k141_32986[full]    | 1248  | No | NA | 2  | 0  | Low-quality    | Genome-fragment | NA | 2.22 |
| S13_extracted_20450       | 1061  | No | NA | 0  | 1  | Not-determined | Genome-fragment | NA | 0    |
| S13_extracted_20573       | 1157  | No | NA | 0  | 0  | Not-determined | Genome-fragment | NA | 0    |
| S13_extracted_20633       | 6616  | No | NA | 0  | 5  | Not-determined | Genome-fragment | NA | 0    |
| S13_extracted_20669       | 1463  | No | NA | 0  | 0  | Not-determined | Genome-fragment | NA | 0    |
| S13_extracted_20741       | 3969  | No | NA | 0  | 2  | Not-determined | Genome-fragment | NA | 0    |
| S13_extracted_20840       | 1488  | No | NA | 0  | 0  | Not-determined | Genome-fragment | NA | 0    |
| S13_extracted_20954       | 1086  | No | NA | 0  | 2  | Not-determined | Genome-fragment | NA | 0    |
| S13_extracted_21012       | 1595  | No | NA | 0  | 2  | Not-determined | Genome-fragment | NA | 0    |
| S5_vs_k141_72943[full]    | 1248  | No | NA | 0  | 1  | Low-quality    | Genome-fragment | NA | 1.84 |
| S13_extracted_21128       | 2712  | No | NA | 0  | 2  | Not-determined | Genome-fragment | NA | 0    |
| S13_extracted_21174       | 1627  | No | NA | 0  | 0  | Not-determined | Genome-fragment | NA | 0    |
| S5_vs_k141_19175[full]    | 1248  | No | NA | 0  | 1  | Low-quality    | Genome-fragment | NA | 1.82 |
| S13_extracted_21343       | 1053  | No | NA | 0  | 0  | Not-determined | Genome-fragment | NA | 0    |
| S5_vs_k141_76162[full]    | 1248  | No | NA | 1  | 0  | Low-quality    | Genome-fragment | NA | 2.99 |
| S5_vs_k141_52073[full]    | 1248  | No | NA | 0  | 0  | Low-quality    | Genome-fragment | NA | 0.76 |
| S13_extracted_21692       | 1060  | No | NA | 0  | 1  | Not-determined | Genome-fragment | NA | 0    |
| S13_extracted_21694       | 1666  | No | NA | 0  | 0  | Not-determined | Genome-fragment | NA | 0    |
| S13_extracted_21772       | 1352  | No | NA | 0  | 5  | Not-determined | Genome-fragment | NA | 0    |
| S13_extracted_21779       | 1185  | No | NA | 0  | 0  | Not-determined | Genome-fragment | NA | 0    |
| S7_vs_5767[full]          | 1248  | No | NA | 0  | 1  | Low-quality    | Genome-fragment | NA | 2.96 |
| S13_extracted_21849       | 11143 | No | NA | 0  | 0  | Not-determined | Genome-fragment | NA | 0    |
| S13_extracted_21997       | 1376  | No | NA | 0  | 0  | Not-determined | Genome-fragment | NA | 0    |
| S13_extracted_22175       | 36043 | No | NA | 17 | 0  | High-quality   | High-quality    | NA | 100  |
| S13_extracted_22186       | 7085  | No | NA | 0  | 5  | Not-determined | Genome-fragment | NA | 1    |
| S7_vs_108664[full]        | 1248  | No | NA | 0  | 1  | Low-quality    | Genome-fragment | NA | 0    |
| S13_extracted_22368       | 1273  | No | NA | 0  | 1  | Not-determined | Genome-fragment | NA | 0    |
| S13_extracted_22384       | 2330  | No | NA | 0  | 2  | Not-determined | Genome-fragment | NA | 0    |
| S7_vs_112735[full]        | 1248  | No | NA | 0  | 0  | Low-quality    | Genome-fragment | NA | 2.93 |
| S7_vs_89927[full]         | 1248  | No | NA | 0  | 0  | Low-quality    | Genome-fragment | NA | 2.48 |
| S13_extracted_22368       | 1222  | No | NA | 0  | 0  | Not-determined | Genome-fragment | NA | 0    |
| S13_extracted_22350       | 3802  |    |    |    |    |                |                 |    |      |



|                              |       |    |    |    |   |                |                 |       |   |
|------------------------------|-------|----|----|----|---|----------------|-----------------|-------|---|
| S13_extracted_25103          | 1034  | No | NA | 0  | 1 | Not-determined | Genome-fragment | NA    | 0 |
| S13_extracted_25244          | 1239  | No | NA | 1  | 1 | Not-determined | Genome-fragment | NA    | 0 |
| S13_extracted_25483          | 1106  | No | NA | 0  | 0 | Not-determined | Genome-fragment | NA    | 0 |
| S13_extracted_25506          | 3382  | No | NA | 0  | 1 | Not-determined | Genome-fragment | NA    | 0 |
| S13_extracted_25553          | 2329  | No | NA | 0  | 0 | Not-determined | Genome-fragment | NA    | 0 |
| S13_extracted_25693          | 1018  | No | NA | 0  | 2 | Not-determined | Genome-fragment | NA    | 0 |
| S13_extracted_26011          | 1109  | No | NA | 0  | 0 | Not-determined | Genome-fragment | NA    | 0 |
| S13_extracted_26115          | 4882  | No | NA | 0  | 2 | Not-determined | Genome-fragment | NA    | 0 |
| S8_vs_k141_141801[full]      | 1248  | No | NA | 0  | 0 | Low-quality    | Genome-fragment | 2.85  | 0 |
| S13_extracted_26492          | 3932  | No | NA | 0  | 1 | Not-determined | Genome-fragment | NA    | 0 |
| S13_extracted_26536          | 1750  | No | NA | 0  | 1 | Not-determined | Genome-fragment | NA    | 0 |
| S13_extracted_26634          | 1031  | No | NA | 1  | 1 | Not-determined | Genome-fragment | NA    | 0 |
| S17_vs_k141_18271[full]      | 1249  | No | NA | 0  | 0 | Low-quality    | Genome-fragment | 2.11  | 0 |
| S13_extracted_26805          | 1043  | No | NA | 0  | 0 | Not-determined | Genome-fragment | NA    | 0 |
| S13_extracted_26904          | 1406  | No | NA | 0  | 1 | Not-determined | Genome-fragment | NA    | 0 |
| S13_extracted_27027          | 1775  | No | NA | 0  | 0 | Not-determined | Genome-fragment | NA    | 0 |
| S13_extracted_27042          | 1448  | No | NA | 0  | 1 | Not-determined | Genome-fragment | NA    | 0 |
| S13_extracted_27087          | 1249  | No | NA | 0  | 1 | Low-quality    | Genome-fragment | 3.03  | 0 |
| S13_extracted_27161          | 2156  | No | NA | 1  | 1 | Not-determined | Genome-fragment | NA    | 0 |
| S13_extracted_27184          | 1091  | No | NA | 0  | 0 | Not-determined | Genome-fragment | NA    | 0 |
| S13_vs_145058[full]          | 1249  | No | NA | 0  | 0 | Low-quality    | Genome-fragment | 2.69  | 0 |
| S13_extracted_27347          | 2637  | No | NA | 0  | 2 | Not-determined | Genome-fragment | NA    | 0 |
| S13_extracted_27390          | 1228  | No | NA | 0  | 0 | Not-determined | Genome-fragment | NA    | 0 |
| S13_vs_51561[hit2gene]       | 1249  | No | NA | 2  | 0 | Low-quality    | Genome-fragment | 2.49  | 0 |
| S14_vs_k141_109225[hit2gene] | 1249  | No | NA | 1  | 0 | Low-quality    | Genome-fragment | 2.92  | 0 |
| S13_extracted_27541          | 1070  | No | NA | 0  | 2 | Not-determined | Genome-fragment | NA    | 0 |
| S13_extracted_27648          | 6378  | No | NA | 0  | 2 | Not-determined | Genome-fragment | NA    | 0 |
| S3_extracted_k141_63420      | 1249  | No | NA | 0  | 0 | Low-quality    | Genome-fragment | 2.08  | 0 |
| S3_vs_k141_61718[hit2gene]   | 1249  | No | NA | 0  | 0 | Low-quality    | Genome-fragment | NA    | 0 |
| S13_extracted_28309          | 15508 | No | NA | 7  | 0 | Medium-quality | Genome-fragment | 66.4  | 0 |
| S7_vs_34948[full]            | 1249  | No | NA | 2  | 0 | Low-quality    | Genome-fragment | 2.82  | 0 |
| S7_vs_113129[full]           | 1249  | No | NA | 0  | 0 | Low-quality    | Genome-fragment | 3.17  | 0 |
| S13_extracted_28773          | 1021  | No | NA | 0  | 0 | Not-determined | Genome-fragment | NA    | 0 |
| S13_extracted_28790          | 2692  | No | NA | 0  | 2 | Not-determined | Genome-fragment | NA    | 0 |
| S13_extracted_29085          | 1111  | No | NA | 0  | 0 | Not-determined | Genome-fragment | NA    | 0 |
| S13_extracted_29093          | 5447  | No | NA | 0  | 2 | Not-determined | Genome-fragment | NA    | 0 |
| S13_extracted_29559          | 1175  | No | NA | 0  | 3 | Not-determined | Genome-fragment | NA    | 0 |
| S10_extracted_66597          | 1249  | No | NA | 1  | 0 | Low-quality    | Genome-fragment | 1.19  | 0 |
| S13_extracted_29706          | 1132  | No | NA | 1  | 1 | Not-determined | Genome-fragment | NA    | 0 |
| S10_vs_49323[full]           | 1249  | No | NA | 0  | 0 | Low-quality    | Genome-fragment | 2.41  | 0 |
| S13_extracted_30218          | 1463  | No | NA | 0  | 0 | Not-determined | Genome-fragment | NA    | 0 |
| S13_extracted_30219          | 1012  | No | NA | 0  | 0 | Not-determined | Genome-fragment | NA    | 0 |
| S13_extracted_30353          | 5700  | No | NA | 0  | 5 | Not-determined | Genome-fragment | NA    | 0 |
| S12_extracted_k141_173554    | 1249  | No | NA | 1  | 0 | Low-quality    | Genome-fragment | 3.4   | 0 |
| S13_extracted_30394          | 1105  | No | NA | 0  | 1 | Not-determined | Genome-fragment | NA    | 0 |
| S6_vs_k141_5801[full]        | 1249  | No | NA | 0  | 0 | Low-quality    | Genome-fragment | 3.59  | 0 |
| S13_extracted_30465          | 1879  | No | NA | 0  | 0 | Not-determined | Genome-fragment | NA    | 0 |
| S13_extracted_30474          | 1529  | No | NA | 0  | 2 | Not-determined | Genome-fragment | NA    | 0 |
| S13_extracted_30500          | 1230  | No | NA | 0  | 1 | Not-determined | Genome-fragment | NA    | 0 |
| S13_extracted_30599          | 1190  | No | NA | 0  | 1 | Not-determined | Genome-fragment | NA    | 0 |
| S17_vs_k141_112565[full]     | 1250  | No | NA | 0  | 0 | Low-quality    | Genome-fragment | 2.11  | 0 |
| S12_extracted_31218          | 20912 | No | NA | 0  | 2 | Not-determined | Genome-fragment | NA    | 0 |
| S9_vs_k141_88324[full]       | 1250  | No | NA | 1  | 0 | Low-quality    | Genome-fragment | 2     | 0 |
| S11_vs_k141_51995[hit2gene]  | 1250  | No | NA | 1  | 0 | Low-quality    | Genome-fragment | 1.83  | 0 |
| S12_extracted_31537          | 3395  | No | NA | 0  | 0 | Not-determined | Genome-fragment | NA    | 0 |
| S13_extracted_31848          | 2339  | No | NA | 0  | 1 | Not-determined | Genome-fragment | NA    | 0 |
| S13_extracted_31967          | 1090  | No | NA | 0  | 1 | Not-determined | Genome-fragment | NA    | 0 |
| S13_extracted_32040          | 2150  | No | NA | 0  | 1 | Not-determined | Genome-fragment | NA    | 0 |
| S13_extracted_32063          | 1624  | No | NA | 0  | 0 | Not-determined | Genome-fragment | NA    | 0 |
| S13_extracted_32097          | 1064  | No | NA | 0  | 1 | Not-determined | Genome-fragment | NA    | 0 |
| S13_extracted_32198          | 1722  | No | NA | 0  | 0 | Not-determined | Genome-fragment | NA    | 0 |
| S13_extracted_32207          | 2109  | No | NA | 0  | 0 | Not-determined | Genome-fragment | NA    | 0 |
| S13_extracted_32208          | 1250  | No | NA | 0  | 1 | Low-quality    | Genome-fragment | 1.69  | 0 |
| S13_extracted_32344          | 1184  | No | NA | 0  | 1 | Not-determined | Genome-fragment | NA    | 0 |
| S14_extracted_k141_109332    | 1250  | No | NA | 3  | 0 | Low-quality    | Genome-fragment | 1.83  | 0 |
| S13_extracted_32475          | 1029  | No | NA | 0  | 1 | Not-determined | Genome-fragment | NA    | 0 |
| S13_extracted_32523          | 1553  | No | NA | 0  | 0 | Not-determined | Genome-fragment | NA    | 0 |
| S13_extracted_32554          | 1152  | No | NA | 0  | 1 | Not-determined | Genome-fragment | NA    | 0 |
| S13_extracted_32708          | 3516  | No | NA | 0  | 1 | Not-determined | Genome-fragment | NA    | 0 |
| S1_vs_k141_62792[full]       | 1250  | No | NA | 1  | 0 | Low-quality    | Genome-fragment | 2.08  | 0 |
| S13_extracted_32838          | 1111  | No | NA | 0  | 2 | Not-determined | Genome-fragment | NA    | 0 |
| S13_extracted_32847          | 11215 | No | NA | 7  | 1 | Not-determined | Genome-fragment | NA    | 0 |
| S1_vs_k141_155973[full]      | 1250  | No | NA | 0  | 0 | Low-quality    | Genome-fragment | 5.24  | 0 |
| S3_extracted_k141_73121      | 1250  | No | NA | 0  | 0 | Low-quality    | Genome-fragment | 1.32  | 0 |
| S7_vs_58436[hit2gene]        | 1250  | No | NA | 0  | 0 | Low-quality    | Genome-fragment | 1.66  | 0 |
| S13_extracted_33317          | 1487  | No | NA | 0  | 2 | Not-determined | Genome-fragment | NA    | 0 |
| S13_extracted_33420          | 1609  | No | NA | 0  | 2 | Not-determined | Genome-fragment | NA    | 0 |
| S15_extracted_51952          | 1250  | No | NA | 0  | 0 | Low-quality    | Genome-fragment | 1.5   | 0 |
| S13_extracted_33794          | 1444  | No | NA | 0  | 1 | Not-determined | Genome-fragment | NA    | 0 |
| S13_extracted_33914          | 1612  | No | NA | 0  | 2 | Not-determined | Genome-fragment | NA    | 0 |
| S13_extracted_34105          | 1775  | No | NA | 0  | 1 | Not-determined | Genome-fragment | NA    | 0 |
| S13_extracted_34125          | 1077  | No | NA | 0  | 1 | Not-determined | Genome-fragment | NA    | 0 |
| S13_extracted_34235          | 1225  | No | NA | 0  | 1 | Not-determined | Genome-fragment | NA    | 0 |
| S13_extracted_34315          | 2375  | No | NA | 0  | 1 | Not-determined | Genome-fragment | NA    | 0 |
| S13_extracted_34514          | 2057  | No | NA | 0  | 1 | Not-determined | Genome-fragment | NA    | 0 |
| S13_extracted_34683          | 4310  | No | NA | 0  | 1 | Not-determined | Genome-fragment | NA    | 0 |
| S13_extracted_34837          | 1168  | No | NA | 0  | 2 | Not-determined | Genome-fragment | NA    | 0 |
| S13_extracted_34912          | 1126  | No | NA | 0  | 0 | Not-determined | Genome-fragment | NA    | 0 |
| S13_extracted_35054          | 1045  | No | NA | 0  | 1 | Not-determined | Genome-fragment | NA    | 0 |
| S13_extracted_35308          | 1268  | No | NA | 0  | 0 | Not-determined | Genome-fragment | NA    | 0 |
| S13_extracted_35315          | 1821  | No | NA | 0  | 0 | Not-determined | Genome-fragment | NA    | 0 |
| S13_extracted_35402          | 1236  | No | NA | 0  | 1 | Not-determined | Genome-fragment | NA    | 0 |
| S13_extracted_35686          | 3014  | No | NA | 0  | 2 | Not-determined | Genome-fragment | NA    | 0 |
| S13_extracted_35800          | 1386  | No | NA | 0  | 0 | Not-determined | Genome-fragment | NA    | 0 |
| S13_extracted_35844          | 1285  | No | NA | 0  | 1 | Not-determined | Genome-fragment | NA    | 0 |
| S13_extracted_36096          | 10981 | No | NA | 0  | 2 | Not-determined | Genome-fragment | NA    | 0 |
| S13_extracted_36156          | 1113  | No | NA | 0  | 1 | Not-determined | Genome-fragment | NA    | 0 |
| S13_extracted_36200          | 1056  | No | NA | 0  | 2 | Not-determined | Genome-fragment | NA    | 0 |
| S13_extracted_36452          | 4514  | No | NA | 0  | 2 | Not-determined | Genome-fragment | NA    | 0 |
| S13_extracted_36508          | 2731  | No | NA | 0  | 1 | Not-determined | Genome-fragment | NA    | 0 |
| S13_extracted_37036          | 1013  | No | NA | 0  | 2 | Not-determined | Genome-fragment | NA    | 0 |
| S9_vs_k141_54104[full]       | 1251  | No | NA | 0  | 0 | Low-quality    | Genome-fragment | 2.75  | 0 |
| S13_extracted_37164          | 2685  | No | NA | 0  | 1 | Not-determined | Genome-fragment | NA    | 0 |
| S13_extracted_37293          | 1423  | No | NA | 0  | 1 | Not-determined | Genome-fragment | NA    | 0 |
| S11_vs_k141_178951[full]     | 1251  | No | NA | 0  | 0 | Low-quality    | Genome-fragment | 3.3   | 0 |
| S13_extracted_37722          | 1185  | No | NA | 0  | 1 | Not-determined | Genome-fragment | NA    | 0 |
| S3_vs_k141_115593[full]      | 1251  | No | NA | 0  | 0 | Low-quality    | Genome-fragment | 1.48  | 0 |
| S13_extracted_38143          | 1199  | No | NA | 0  | 1 | Not-determined | Genome-fragment | NA    | 0 |
| S3_vs_k141_6007[full]        | 1251  | No | NA | 0  | 0 | Low-quality    | Genome-fragment | 3.75  | 0 |
| S5_extracted_k141_76625      | 1251  | No | NA | 0  | 0 | Low-quality    | Genome-fragment | 2.5   | 0 |
| S7_vs_28158[full]            | 1251  | No | NA | 0  | 0 | Low-quality    | Genome-fragment | 0.91  | 0 |
| S7_vs_80674[full]            | 1251  | No | NA | 0  | 0 | Low-quality    | Genome-fragment | 2.84  | 0 |
| S16_extracted_91732          | 1251  | No | NA | 2  | 0 | Low-quality    | Genome-fragment | 2.85  | 0 |
| S13_extracted_38708          | 29135 | No | NA | 16 | 1 | Medium-quality | Genome-fragment | 53.17 | 0 |
| S13_extracted_38984          | 1075  | No | NA | 0  | 0 | Not-determined | Genome-fragment | NA    | 0 |
| S13_extracted_39069          | 2066  | No | NA | 0  | 1 | Not-determined | Genome-fragment | NA    | 0 |
| S10_extracted_108721         | 1251  | No | NA | 0  | 1 | Low-quality    | Genome-fragment | 0.22  | 0 |
| S13_extracted_39196          | 1478  | No | NA | 0  | 1 | Not-determined | Genome-fragment | NA    | 0 |
| S8_vs_k141_16824[full]       | 1251  | No | NA | 0  | 1 | Low-quality    | Genome-fragment | 1.41  | 0 |
| S13_extracted_39531          | 1490  | No | NA | 0  | 0 | Not-determined | Genome-fragment | NA    | 0 |
| S13_extracted_39533          | 1416  | No | NA | 0  | 0 | Not-determined | Genome-fragment | NA    | 0 |
| S13_extracted_39622          | 1153  | No | NA | 0  | 1 | Not-determined | Genome-fragment | NA    | 0 |
| S13_extracted_39908          | 2135  | No | NA | 0  | 0 | Not-determined | Genome-fragment | NA    | 0 |
| S8_vs_k141_49063[full]       | 1251  | No | NA | 0  | 1 | Low-quality    | Genome-fragment | 0.89  | 0 |
| S13_extracted_40220          | 1432  | No | NA | 0  | 1 | Not-determined | Genome-fragment | NA    | 0 |
| S17_extracted_k141_174688    | 1252  | No | NA | 0  | 1 | Low-quality    | Genome-fragment | 1.12  | 0 |
| S13_extracted_40432          | 1647  | No | NA | 0  | 2 | Not-determined | Genome-fragment | NA    | 0 |
| S13_extracted_40443          | 1132  | No | NA | 0  | 0 | Not-determined | Genome-fragment | NA    | 0 |
| S13_extracted_40791          | 1478  | No | NA | 0  | 0 | Not-determined | Genome-fragment | NA    | 0 |
| S13_extracted_41076          | 1379  | No | NA | 0  | 1 | Not-determined | Genome-fragment | NA    | 0 |
| S17_vs_k141_82881[full]      | 1252  | No | NA | 0  | 0 | Low-quality    | Genome-fragment | 0.86  | 0 |
| S9_vs_k141_682861[full]      | 1252  | No | NA | 1  | 0 | Low-quality    | Genome-fragment | 3.49  | 0 |
| S13_extracted_41273          | 1579  | No | NA | 0  | 0 | Not-determined | Genome-fragment | NA    | 0 |
| S13_extracted_41311          | 1216  | No | NA | 0  | 0 | Not-determined | Genome-fragment | NA    | 0 |
| S13_extracted_41404          | 1084  | No | NA | 0  | 1 | Not-determined | Genome-fragment | NA    | 0 |
| S13_extracted_41514          | 2207  | No | NA | 0  | 0 | Not-determined | Genome-fragment | NA    | 0 |
| S13_extracted_41842          | 3240  | No | NA | 0  | 2 | Not-determined | Genome-fragment | NA    | 0 |
| S9_vs_k141_654991[full]      | 1252  | No | NA | 0  | 1 | Low-quality    | Genome-fragment | 2.53  | 0 |
| S13_extracted_41980          | 4238  | No | NA | 0  | 3 | Not-determined | Genome-fragment | NA    | 0 |
| S13_extracted_42250          | 2041  | No | NA | 0  | 1 | Not-determined | Genome-fragment | NA    | 0 |
| S13_extracted_42434          | 2831  | No | NA | 0  | 1 | Not-determined | Genome-fragment | NA    | 0 |
| S13_extracted_42450          | 1322  | No | NA | 0  | 1 | Not-determined | Genome-fragment | NA    | 0 |
| S13_extracted_42655          | 1037  | No | NA | 0  | 1 | Not-determined | Genome-fragment | NA    | 0 |
| S11_vs_k141_89027[full]      | 1252  | No | NA | 0  | 0 | Low-quality    | Genome-fragment | 3.65  | 0 |
| S13_extracted_43171          | 1480  | No | NA | 0  | 1 | Not-determined | Genome-fragment | NA    | 0 |
| S11_vs_k141_49270[full]      | 1252  | No | NA | 0  | 2 | Low-quality    | Genome-fragment | 0.56  | 0 |
| S7_extracted_73218           | 1252  | No | NA | 0  | 0 | Low-quality    | Genome-fragment | 2.6   | 0 |
| S13_extracted_43858          | 1405  | No | NA | 0  | 1 | Not-determined | Genome-fragment | NA    | 0 |
| S13_extracted_43871          | 1852  | No | NA | 0  | 0 | Not-determined | Genome-fragment | NA    | 0 |
| S13_extracted_43889          | 3568  | No | NA | 0  | 2 | Not-determined | Genome-fragment |       |   |



|                           |       |    |    |    |   |                |                 |    |       |
|---------------------------|-------|----|----|----|---|----------------|-----------------|----|-------|
| S13_extracted_45986       | 1298  | No | NA | 0  | 1 | Not-determined | Genome-fragment | NA | 0     |
| S13_extracted_45999       | 1012  | No | NA | 0  | 1 | Not-determined | Genome-fragment | NA | 0     |
| S8_extracted_k141_123126  | 1252  | No | NA | 1  | 0 | Low-quality    | Genome-fragment | NA | 0.97  |
| S13_extracted_46568       | 1462  | No | NA | 0  | 0 | Not-determined | Genome-fragment | NA | 0     |
| S13_extracted_46617       | 1133  | No | NA | 0  | 2 | Not-determined | Genome-fragment | NA | 0     |
| S13_extracted_46767       | 5986  | No | NA | 0  | 4 | Not-determined | Genome-fragment | NA | 0     |
| S13_extracted_46865       | 3211  | No | NA | 0  | 2 | Not-determined | Genome-fragment | NA | 0     |
| S13_extracted_46957       | 1601  | No | NA | 0  | 1 | Not-determined | Genome-fragment | NA | 0     |
| S13_extracted_46985       | 1457  | No | NA | 0  | 0 | Not-determined | Genome-fragment | NA | 0     |
| S13_extracted_47343       | 4457  | No | NA | 0  | 1 | Not-determined | Genome-fragment | NA | 0     |
| S9_vs_k141_478161 full    | 1253  | No | NA | 0  | 0 | Low-quality    | Genome-fragment | NA | 1.94  |
| S13_extracted_47662       | 1814  | No | NA | 0  | 2 | Not-determined | Genome-fragment | NA | 0     |
| S13_extracted_47937       | 2752  | No | NA | 0  | 4 | Not-determined | Genome-fragment | NA | 0     |
| S13_extracted_k141_53246  | 1253  | No | NA | 0  | 1 | Low-quality    | Genome-fragment | NA | 1.81  |
| S13_extracted_47994       | 4534  | No | NA | 0  | 2 | Not-determined | Genome-fragment | NA | 0     |
| S13_extracted_48007       | 3220  | No | NA | 0  | 1 | Not-determined | Genome-fragment | NA | 0     |
| S13_extracted_48100       | 1064  | No | NA | 0  | 2 | Not-determined | Genome-fragment | NA | 0     |
| S13_extracted_48122       | 1468  | No | NA | 0  | 1 | Not-determined | Genome-fragment | NA | 0     |
| S5_extracted_k141_138377  | 1253  | No | NA | 2  | 0 | Low-quality    | Genome-fragment | NA | 2.04  |
| S13_extracted_48359       | 3225  | No | NA | 0  | 1 | Not-determined | Genome-fragment | NA | 0     |
| S13_extracted_48416       | 1281  | No | NA | 0  | 0 | Not-determined | Genome-fragment | NA | 0     |
| S13_extracted_48447       | 1035  | No | NA | 0  | 0 | Not-determined | Genome-fragment | NA | 0     |
| S7_vs_604151 full         | 1253  | No | NA | 1  | 0 | Low-quality    | Genome-fragment | NA | 1.93  |
| S13_extracted_48635       | 3757  | No | NA | 0  | 2 | Not-determined | Genome-fragment | NA | 0     |
| S16_vs_162001 full        | 1253  | No | NA | 0  | 0 | Low-quality    | Genome-fragment | NA | 2.66  |
| S13_extracted_48901       | 1212  | No | NA | 0  | 1 | Not-determined | Genome-fragment | NA | 0     |
| S16_vs_587521 W2gene      | 1253  | No | NA | 1  | 0 | Low-quality    | Genome-fragment | NA | 2.04  |
| S10_extracted_94592       | 1253  | No | NA | 1  | 0 | Low-quality    | Genome-fragment | NA | 1.43  |
| S13_extracted_50140       | 1221  | No | NA | 0  | 1 | Not-determined | Genome-fragment | NA | 0     |
| S13_extracted_50510       | 1074  | No | NA | 0  | 0 | Not-determined | Genome-fragment | NA | 0     |
| S13_extracted_50625       | 1153  | No | NA | 0  | 1 | Not-determined | Genome-fragment | NA | 0     |
| S12_vs_k141_1437021 full  | 1253  | No | NA | 2  | 0 | Low-quality    | Genome-fragment | NA | 0.42  |
| S13_extracted_50864       | 3774  | No | NA | 0  | 1 | Not-determined | Genome-fragment | NA | 0     |
| S13_extracted_50892       | 1348  | No | NA | 0  | 1 | Not-determined | Genome-fragment | NA | 0     |
| S13_extracted_51115       | 1580  | No | NA | 0  | 1 | Not-determined | Genome-fragment | NA | 0     |
| S13_extracted_51149       | 1082  | No | NA | 0  | 1 | Not-determined | Genome-fragment | NA | 0     |
| S13_extracted_51168       | 1330  | No | NA | 0  | 0 | Not-determined | Genome-fragment | NA | 0     |
| S13_extracted_51365       | 1825  | No | NA | 0  | 0 | Not-determined | Genome-fragment | NA | 0     |
| S13_extracted_51417       | 2711  | No | NA | 0  | 0 | Not-determined | Genome-fragment | NA | 0     |
| S13_extracted_51592       | 1410  | No | NA | 0  | 2 | Not-determined | Genome-fragment | NA | 0     |
| S13_extracted_51902       | 4871  | No | NA | 0  | 4 | Not-determined | Genome-fragment | NA | 0     |
| S13_extracted_52128       | 1556  | No | NA | 0  | 1 | Not-determined | Genome-fragment | NA | 0     |
| S13_extracted_52421       | 3062  | No | NA | 0  | 3 | Not-determined | Genome-fragment | NA | 0     |
| S13_extracted_52450       | 1376  | No | NA | 0  | 0 | Not-determined | Genome-fragment | NA | 0     |
| S13_extracted_52546       | 3425  | No | NA | 0  | 5 | Not-determined | Genome-fragment | NA | 0     |
| S13_extracted_52597       | 1168  | No | NA | 0  | 1 | Not-determined | Genome-fragment | NA | 0     |
| S13_extracted_52694       | 1031  | No | NA | 0  | 0 | Not-determined | Genome-fragment | NA | 0     |
| S13_extracted_52697       | 3591  | No | NA | 0  | 0 | Not-determined | Genome-fragment | NA | 0     |
| S13_extracted_52722       | 1744  | No | NA | 0  | 0 | Not-determined | Genome-fragment | NA | 0     |
| S13_extracted_52798       | 1071  | No | NA | 0  | 1 | Not-determined | Genome-fragment | NA | 0     |
| S13_extracted_52824       | 1393  | No | NA | 0  | 0 | Not-determined | Genome-fragment | NA | 0     |
| S13_extracted_53023       | 1647  | No | NA | 0  | 1 | Not-determined | Genome-fragment | NA | 0     |
| S13_extracted_53177       | 1403  | No | NA | 0  | 1 | Not-determined | Genome-fragment | NA | 0     |
| S13_extracted_53284       | 3273  | No | NA | 0  | 1 | Not-determined | Genome-fragment | NA | 0     |
| S12_extracted_53341       | 9067  | No | NA | 0  | 2 | Not-determined | Genome-fragment | NA | 0     |
| S13_extracted_53383       | 1222  | No | NA | 0  | 2 | Not-determined | Genome-fragment | NA | 0     |
| S13_extracted_53405       | 1110  | No | NA | 0  | 2 | Not-determined | Genome-fragment | NA | 0     |
| S13_extracted_53407       | 3218  | No | NA | 0  | 0 | Not-determined | Genome-fragment | NA | 0     |
| S13_extracted_53527       | 1020  | No | NA | 0  | 2 | Not-determined | Genome-fragment | NA | 0     |
| S13_extracted_53633       | 5163  | No | NA | 0  | 2 | Not-determined | Genome-fragment | NA | 0     |
| S2_extracted_k141_145000  | 1253  | No | NA | 0  | 0 | Low-quality    | Genome-fragment | NA | 0.59  |
| S13_extracted_53649       | 1052  | No | NA | 0  | 0 | Not-determined | Genome-fragment | NA | 0     |
| S13_extracted_53729       | 1082  | No | NA | 0  | 0 | Not-determined | Genome-fragment | NA | 0     |
| S13_extracted_53842       | 2803  | No | NA | 0  | 2 | Not-determined | Genome-fragment | NA | 0     |
| S13_extracted_53926       | 1792  | No | NA | 0  | 2 | Not-determined | Genome-fragment | NA | 0     |
| S13_extracted_53959       | 2407  | No | NA | 0  | 0 | Not-determined | Genome-fragment | NA | 0     |
| S13_extracted_54201       | 37389 | No | NA | 13 | 1 | Medium-quality | Genome-fragment | NA | 64.56 |
| S13_extracted_54371       | 1318  | No | NA | 0  | 1 | Not-determined | Genome-fragment | NA | 0     |
| S8_vs_k141_1584071 full   | 1253  | No | NA | 0  | 0 | Low-quality    | Genome-fragment | NA | 1.08  |
| S13_extracted_54541       | 3266  | No | NA | 0  | 2 | Not-determined | Genome-fragment | NA | 0     |
| S13_extracted_54653       | 1847  | No | NA | 0  | 4 | Not-determined | Genome-fragment | NA | 0     |
| S8_vs_k141_1886221 full   | 1253  | No | NA | 1  | 0 | Low-quality    | Genome-fragment | NA | 2.12  |
| S13_extracted_54882       | 2652  | No | NA | 0  | 3 | Not-determined | Genome-fragment | NA | 0     |
| S13_extracted_55148       | 1299  | No | NA | 0  | 1 | Not-determined | Genome-fragment | NA | 0     |
| S13_extracted_55192       | 1564  | No | NA | 0  | 0 | Not-determined | Genome-fragment | NA | 0     |
| S13_extracted_55632       | 1152  | No | NA | 0  | 0 | Not-determined | Genome-fragment | NA | 0     |
| S13_extracted_55637       | 1275  | No | NA | 0  | 1 | Not-determined | Genome-fragment | NA | 0     |
| S13_extracted_55653       | 5110  | No | NA | 0  | 3 | Not-determined | Genome-fragment | NA | 0     |
| S13_extracted_55711       | 3024  | No | NA | 0  | 0 | Not-determined | Genome-fragment | NA | 0     |
| S13_extracted_55802       | 3058  | No | NA | 0  | 3 | Not-determined | Genome-fragment | NA | 0     |
| S13_extracted_55962       | 1192  | No | NA | 0  | 2 | Not-determined | Genome-fragment | NA | 0     |
| S13_extracted_56074       | 7781  | No | NA | 15 | 0 | Complete       | High-quality    | NA | 100   |
| S13_extracted_56100       | 1722  | No | NA | 0  | 1 | Not-determined | Genome-fragment | NA | 0     |
| S13_extracted_56229       | 1036  | No | NA | 0  | 1 | Not-determined | Genome-fragment | NA | 0     |
| S13_extracted_56790       | 1399  | No | NA | 0  | 0 | Not-determined | Genome-fragment | NA | 0     |
| S13_extracted_56873       | 4377  | No | NA | 0  | 1 | Not-determined | Genome-fragment | NA | 0     |
| S13_vs_1387141 full       | 1254  | No | NA | 0  | 1 | Low-quality    | Genome-fragment | NA | 2.97  |
| S13_extracted_57051       | 1588  | No | NA | 0  | 1 | Not-determined | Genome-fragment | NA | 0     |
| S13_extracted_57234       | 1107  | No | NA | 0  | 0 | Not-determined | Genome-fragment | NA | 0     |
| S13_extracted_57276       | 1277  | No | NA | 0  | 0 | Not-determined | Genome-fragment | NA | 0     |
| S13_extracted_57330       | 1169  | No | NA | 0  | 1 | Not-determined | Genome-fragment | NA | 0     |
| S13_extracted_57766       | 3611  | No | NA | 0  | 3 | Not-determined | Genome-fragment | NA | 0     |
| S13_extracted_57881       | 1753  | No | NA | 0  | 1 | Not-determined | Genome-fragment | NA | 0     |
| S13_extracted_57910       | 1509  | No | NA | 0  | 0 | Not-determined | Genome-fragment | NA | 0     |
| S13_extracted_57965       | 1348  | No | NA | 0  | 1 | Not-determined | Genome-fragment | NA | 0     |
| S14_extracted_k141_88861  | 1254  | No | NA | 0  | 0 | Low-quality    | Genome-fragment | NA | 1.62  |
| S11_extracted_k141_89491  | 1254  | No | NA | 0  | 0 | Low-quality    | Genome-fragment | NA | 1.25  |
| S11_extracted_k141_186946 | 1254  | No | NA | 0  | 1 | Low-quality    | Genome-fragment | NA | 0.69  |
| S13_extracted_58007       | 1612  | No | NA | 0  | 2 | Not-determined | Genome-fragment | NA | 0     |
| S13_extracted_58274       | 1173  | No | NA | 0  | 1 | Not-determined | Genome-fragment | NA | 0     |
| S13_extracted_58303       | 1202  | No | NA | 0  | 1 | Not-determined | Genome-fragment | NA | 0     |
| S13_extracted_58351       | 1578  | No | NA | 0  | 1 | Not-determined | Genome-fragment | NA | 0     |
| S13_extracted_58449       | 1562  | No | NA | 0  | 2 | Not-determined | Genome-fragment | NA | 0     |
| S13_extracted_58466       | 1417  | No | NA | 0  | 1 | Not-determined | Genome-fragment | NA | 0     |
| S13_extracted_58581       | 1502  | No | NA | 0  | 1 | Not-determined | Genome-fragment | NA | 0     |
| S3_extracted_k141_86816   | 1254  | No | NA | 1  | 0 | Low-quality    | Genome-fragment | NA | 0.27  |
| S13_extracted_58862       | 3312  | No | NA | 0  | 2 | Not-determined | Genome-fragment | NA | 0     |
| S13_extracted_58878       | 1097  | No | NA | 0  | 1 | Not-determined | Genome-fragment | NA | 0     |
| S13_extracted_58986       | 1614  | No | NA | 0  | 2 | Not-determined | Genome-fragment | NA | 0     |
| S13_extracted_59075       | 1223  | No | NA | 0  | 0 | Not-determined | Genome-fragment | NA | 0     |
| S5_extracted_k141_64679   | 1254  | No | NA | 2  | 0 | Low-quality    | Genome-fragment | NA | 3.53  |
| S13_extracted_59450       | 1292  | No | NA | 0  | 0 | Not-determined | Genome-fragment | NA | 0     |
| S13_extracted_59570       | 1010  | No | NA | 0  | 1 | Not-determined | Genome-fragment | NA | 0     |
| S5_vs_k141_54871 full     | 1254  | No | NA | 1  | 0 | Low-quality    | Genome-fragment | NA | 3.24  |
| S13_extracted_59894       | 3378  | No | NA | 0  | 1 | Not-determined | Genome-fragment | NA | 0     |
| S13_extracted_59944       | 1131  | No | NA | 0  | 1 | Not-determined | Genome-fragment | NA | 0     |
| S13_extracted_60194       | 3130  | No | NA | 0  | 1 | Not-determined | Genome-fragment | NA | 0     |
| S12_extracted_60250       | 1402  | No | NA | 0  | 0 | Not-determined | Genome-fragment | NA | 0     |
| S13_extracted_60487       | 5241  | No | NA | 0  | 4 | Not-determined | Genome-fragment | NA | 0     |
| S13_extracted_60600       | 3724  | No | NA | 0  | 3 | Not-determined | Genome-fragment | NA | 0     |
| S13_extracted_60925       | 5318  | No | NA | 0  | 5 | Not-determined | Genome-fragment | NA | 0     |
| S5_vs_k141_1021151 full   | 1254  | No | NA | 0  | 0 | Low-quality    | Genome-fragment | NA | 2.21  |
| S13_extracted_61109       | 1604  | No | NA | 0  | 2 | Not-determined | Genome-fragment | NA | 0     |
| S13_extracted_61328       | 1046  | No | NA | 0  | 1 | Not-determined | Genome-fragment | NA | 0     |
| S13_extracted_61378       | 1693  | No | NA | 0  | 2 | Not-determined | Genome-fragment | NA | 0     |
| S7_extracted_80519        | 1254  | No | NA | 2  | 0 | Low-quality    | Genome-fragment | NA | 0.48  |
| S13_extracted_61475       | 1511  | No | NA | 0  | 1 | Not-determined | Genome-fragment | NA | 0     |
| S13_extracted_61504       | 1324  | No | NA | 0  | 1 | Not-determined | Genome-fragment | NA | 0     |
| S13_extracted_61518       | 1447  | No | NA | 0  | 0 | Not-determined | Genome-fragment | NA | 0     |
| S13_extracted_61613       | 1263  | No | NA | 0  | 1 | Not-determined | Genome-fragment | NA | 0     |
| S16_extracted_123255      | 1254  | No | NA | 0  | 0 | Low-quality    | Genome-fragment | NA | 2.16  |
| S13_extracted_61719       | 1843  | No | NA | 0  | 2 | Not-determined | Genome-fragment | NA | 0     |
| S13_extracted_61886       | 1473  | No | NA | 0  | 0 | Not-determined | Genome-fragment | NA | 0     |
| S13_extracted_61904       | 1026  | No | NA | 0  | 1 | Not-determined | Genome-fragment | NA | 0     |
| S13_extracted_62001       | 1678  | No | NA | 0  | 1 | Not-determined | Genome-fragment | NA | 0     |
| S13_extracted_62006       | 1256  | No | NA | 0  | 1 | Not-determined | Genome-fragment | NA | 0     |
| S13_extracted_62048       | 1338  | No | NA | 0  | 1 | Not-determined | Genome-fragment | NA | 0     |
| S13_extracted_62189       | 1311  | No | NA | 0  | 0 | Not-determined | Genome-fragment | NA | 0     |
| S13_extracted_62262       | 1201  | No | NA | 0  | 0 | Not-determined | Genome-fragment | NA | 0     |
| S13_extracted_62321       | 1693  | No | NA | 0  | 1 | Not-determined | Genome-fragment | NA | 0     |
| S13_extracted_62411       | 1858  | No | NA | 0  | 1 | Not-determined | Genome-fragment | NA | 0     |
| S13_extracted_62432       | 3647  | No | NA | 0  | 0 | Not-determined | Genome-fragment | NA | 0     |
| S13_extracted_162747      | 1254  | No | NA | 1  | 0 | Low-quality    | Genome-fragment | NA | 2.31  |
| S10_vs_102911 full        | 1254  | No | NA | 0  | 2 | Low-quality    | Genome-fragment | NA | 0.75  |
| S13_extracted_62500       | 1042  | No | NA | 0  | 0 | Not-determined | Genome-fragment | NA | 0     |
| S13_extracted_62746       | 1392  | No | NA | 0  | 0 | Not-determined | Genome-fragment | NA | 0     |
| S13_extracted_62752       | 1223  | No | NA | 0  | 1 | Not-determined | Genome-fragment | NA | 0     |
| S13_extracted_62783       | 1641  | No | NA | 0  | 1 | Not-determined | Genome-fragment | NA | 0     |
| S13_extracted_62858       | 1997  | No | NA | 0  | 2 | Not-determined | Genome-fragment | NA | 0     |
| S13_extracted_62907       | 2312  | No | NA | 0  | 1 | Not-determined | Genome-fragment | NA | 0     |
| S13_extracted_63300       | 1243  | No | NA | 0  | 1 | Not-determined | Genome-fragment | NA |       |



|                            |       |     |     |    |    |                |                 |    |      |       |
|----------------------------|-------|-----|-----|----|----|----------------|-----------------|----|------|-------|
| S13_extracted_66170        | 1172  | No  | NA  | 0  | 0  | Not-determined | Genome-fragment | NA |      | 0     |
| S13_vs_k141_31192  full    | 1255  | No  | NA  | 0  | 0  | Low-quality    | Genome-fragment | NA | 2.22 | 0     |
| S13_extracted_66348        | 3470  | No  | NA  | 0  | 2  | Not-determined | Genome-fragment | NA |      | 0     |
| S13_extracted_66365        | 7357  | No  | NA  | 0  | 3  | Not-determined | Genome-fragment | NA |      | 0     |
| S14_extracted_k141_83046   | 1255  | No  | NA  | 2  | 0  | Low-quality    | Genome-fragment | NA | 2.85 | 0     |
| S13_extracted_66508        | 38005 | No  | NA  | 5  | 0  | High-quality   | Genome-fragment | NA | 100  | 0     |
| S13_extracted_66738        | 1091  | No  | NA  | 0  | 2  | Not-determined | Genome-fragment | NA |      | 0     |
| S13_extracted_66791        | 1410  | No  | NA  | 0  | 0  | Not-determined | Genome-fragment | NA |      | 0     |
| S13_extracted_66808        | 3321  | No  | NA  | 0  | 1  | Not-determined | Genome-fragment | NA |      | 0     |
| S13_extracted_67092        | 3525  | No  | NA  | 0  | 0  | Not-determined | Genome-fragment | NA |      | 0     |
| S13_extracted_67095        | 1044  | No  | NA  | 0  | 0  | Not-determined | Genome-fragment | NA |      | 0     |
| S13_extracted_67785        | 1490  | No  | NA  | 0  | 1  | Not-determined | Genome-fragment | NA |      | 0     |
| S13_extracted_68135        | 1244  | No  | NA  | 0  | 1  | Not-determined | Genome-fragment | NA |      | 0     |
| S13_extracted_68234        | 1054  | No  | NA  | 0  | 0  | Not-determined | Genome-fragment | NA |      | 0     |
| S1_extracted_k141_76531    | 1255  | No  | NA  | 0  | 1  | Low-quality    | Genome-fragment | NA | 0.34 | 0     |
| S5_extracted_k141_130708   | 1255  | No  | NA  | 0  | 0  | Low-quality    | Genome-fragment | NA | 2.71 | 0     |
| S13_extracted_68715        | 1846  | No  | NA  | 1  | 0  | Not-determined | Genome-fragment | NA |      | 0     |
| S13_extracted_69063        | 3885  | No  | NA  | 0  | 1  | Not-determined | Genome-fragment | NA |      | 0     |
| S13_extracted_69155        | 1748  | No  | NA  | 0  | 0  | Not-determined | Genome-fragment | NA |      | 0     |
| S13_extracted_69250        | 6052  | No  | NA  | 0  | 1  | Not-determined | Genome-fragment | NA |      | 0     |
| S5_vs_k141_10744  full     | 1255  | No  | NA  | 0  | 0  | Low-quality    | Genome-fragment | NA | 3.22 | 0     |
| S13_extracted_69467        | 3270  | No  | NA  | 0  | 4  | Not-determined | Genome-fragment | NA |      | 0     |
| S13_extracted_69784        | 1145  | No  | NA  | 0  | 1  | Not-determined | Genome-fragment | NA |      | 0     |
| S13_extracted_69789        | 1020  | No  | NA  | 0  | 0  | Not-determined | Genome-fragment | NA |      | 0     |
| S13_extracted_69796        | 1153  | No  | NA  | 0  | 0  | Not-determined | Genome-fragment | NA |      | 0     |
| S13_extracted_69822        | 2053  | No  | NA  | 0  | 0  | Not-determined | Genome-fragment | NA |      | 0     |
| S13_extracted_69886        | 1795  | No  | NA  | 0  | 0  | Not-determined | Genome-fragment | NA |      | 0     |
| S7_vs_k141_86323  full     | 1255  | No  | NA  | 1  | 0  | Low-quality    | Genome-fragment | NA | 3.03 | 0     |
| S13_extracted_69978        | 1971  | No  | NA  | 2  | 2  | Not-determined | Genome-fragment | NA |      | 0     |
| S13_extracted_70081        | 1005  | No  | NA  | 0  | 0  | Not-determined | Genome-fragment | NA |      | 0     |
| S13_extracted_70190        | 1329  | No  | NA  | 0  | 2  | Not-determined | Genome-fragment | NA |      | 0     |
| S13_extracted_70223        | 1817  | No  | NA  | 1  | 1  | Not-determined | Genome-fragment | NA |      | 0     |
| S13_extracted_70237        | 1080  | No  | NA  | 0  | 0  | Not-determined | Genome-fragment | NA |      | 0     |
| S13_extracted_70293        | 1063  | No  | NA  | 0  | 0  | Not-determined | Genome-fragment | NA |      | 0     |
| S13_extracted_70399        | 1690  | No  | NA  | 0  | 0  | Not-determined | Genome-fragment | NA |      | 0     |
| S13_extracted_70486        | 1177  | No  | NA  | 0  | 1  | Not-determined | Genome-fragment | NA |      | 0     |
| S16_vs_k141_153164  H2gene | 1255  | No  | NA  | 2  | 0  | Low-quality    | Genome-fragment | NA | 2.86 | 0     |
| S13_extracted_70630        | 1091  | No  | NA  | 0  | 0  | Not-determined | Genome-fragment | NA |      | 0     |
| S13_extracted_70825        | 1314  | No  | NA  | 1  | 1  | Not-determined | Genome-fragment | NA |      | 0     |
| S12_vs_k141_119282  full   | 1255  | Yes | 980 | 1  | 1  | Low-quality    | Genome-fragment | NA | 2.15 | 21.91 |
| S13_extracted_71043        | 2094  | No  | NA  | 0  | 0  | Not-determined | Genome-fragment | NA |      | 0     |
| S13_extracted_71066        | 1359  | No  | NA  | 0  | 0  | Not-determined | Genome-fragment | NA |      | 0     |
| S13_extracted_71130        | 1049  | No  | NA  | 0  | 1  | Not-determined | Genome-fragment | NA |      | 0     |
| S13_extracted_71544        | 1666  | No  | NA  | 0  | 1  | Not-determined | Genome-fragment | NA |      | 0     |
| S13_extracted_71753        | 4440  | No  | NA  | 0  | 0  | Not-determined | Genome-fragment | NA |      | 0     |
| S13_extracted_71802        | 3447  | No  | NA  | 0  | 3  | Not-determined | Genome-fragment | NA |      | 0     |
| S13_extracted_71960        | 1603  | No  | NA  | 0  | 0  | Not-determined | Genome-fragment | NA |      | 0     |
| S13_extracted_71990        | 5240  | No  | NA  | 0  | 4  | Not-determined | Genome-fragment | NA |      | 0     |
| S8_vs_k141_13332  H2gene   | 1255  | No  | NA  | 1  | 1  | Low-quality    | Genome-fragment | NA | 3.13 | 0     |
| S13_extracted_72193        | 3930  | No  | NA  | 0  | 7  | Not-determined | Genome-fragment | NA |      | 0     |
| S13_extracted_72233        | 1865  | No  | NA  | 0  | 0  | Not-determined | Genome-fragment | NA |      | 0     |
| S13_extracted_72390        | 1347  | No  | NA  | 0  | 4  | Not-determined | Genome-fragment | NA |      | 0     |
| S13_extracted_72772        | 1153  | No  | NA  | 0  | 1  | Not-determined | Genome-fragment | NA |      | 0     |
| S13_extracted_72858        | 1372  | No  | NA  | 0  | 2  | Not-determined | Genome-fragment | NA |      | 0     |
| S13_extracted_72894        | 1689  | No  | NA  | 0  | 2  | Not-determined | Genome-fragment | NA |      | 0     |
| S13_extracted_73157        | 1647  | No  | NA  | 0  | 0  | Not-determined | Genome-fragment | NA |      | 0     |
| S17_extracted_k141_98381   | 1256  | No  | NA  | 0  | 0  | Low-quality    | Genome-fragment | NA | 0.77 | 0     |
| S13_extracted_73777        | 1107  | No  | NA  | 0  | 0  | Not-determined | Genome-fragment | NA |      | 0     |
| S13_extracted_73779        | 2479  | No  | NA  | 0  | 1  | Not-determined | Genome-fragment | NA |      | 0     |
| S13_extracted_73788        | 1321  | No  | NA  | 0  | 0  | Not-determined | Genome-fragment | NA |      | 0     |
| S13_extracted_73971        | 5982  | No  | NA  | 0  | 2  | Not-determined | Genome-fragment | NA |      | 0     |
| S13_extracted_73973        | 1926  | No  | NA  | 0  | 0  | Not-determined | Genome-fragment | NA |      | 0     |
| S13_extracted_k141_67265   | 1256  | No  | NA  | 0  | 0  | Low-quality    | Genome-fragment | NA | 1.53 | 0     |
| S13_extracted_74648        | 1302  | No  | NA  | 0  | 0  | Not-determined | Genome-fragment | NA |      | 0     |
| S13_extracted_74771        | 1002  | No  | NA  | 0  | 0  | Not-determined | Genome-fragment | NA |      | 0     |
| S13_extracted_75153        | 1262  | No  | NA  | 0  | 2  | Not-determined | Genome-fragment | NA |      | 0     |
| S13_extracted_75230        | 2133  | No  | NA  | 0  | 2  | Not-determined | Genome-fragment | NA |      | 0     |
| S13_extracted_75400        | 1099  | No  | NA  | 0  | 1  | Not-determined | Genome-fragment | NA |      | 0     |
| S13_extracted_75498        | 1021  | No  | NA  | 0  | 0  | Not-determined | Genome-fragment | NA |      | 0     |
| S13_extracted_75593        | 3184  | No  | NA  | 0  | 0  | Not-determined | Genome-fragment | NA |      | 0     |
| S13_extracted_75606        | 1172  | No  | NA  | 0  | 1  | Not-determined | Genome-fragment | NA |      | 0     |
| S13_extracted_75610        | 1009  | No  | NA  | 0  | 0  | Not-determined | Genome-fragment | NA |      | 0     |
| S13_extracted_75783        | 3144  | No  | NA  | 0  | 1  | Not-determined | Genome-fragment | NA |      | 0     |
| S13_extracted_76319        | 1133  | No  | NA  | 0  | 1  | Not-determined | Genome-fragment | NA |      | 0     |
| S13_extracted_76364        | 1536  | No  | NA  | 0  | 0  | Not-determined | Genome-fragment | NA |      | 0     |
| S13_extracted_76418        | 1782  | No  | NA  | 0  | 2  | Not-determined | Genome-fragment | NA |      | 0     |
| S13_extracted_76436        | 1002  | No  | NA  | 0  | 1  | Not-determined | Genome-fragment | NA |      | 0     |
| S13_extracted_76884        | 2420  | No  | NA  | 0  | 1  | Not-determined | Genome-fragment | NA |      | 0     |
| S13_extracted_77042        | 1567  | No  | NA  | 0  | 0  | Not-determined | Genome-fragment | NA |      | 0     |
| S14_extracted_k141_57446   | 1256  | No  | NA  | 1  | 0  | Low-quality    | Genome-fragment | NA | 0.71 | 0     |
| S14_vs_k141_155907  full   | 1256  | No  | NA  | 1  | 0  | Low-quality    | Genome-fragment | NA | 2.08 | 0     |
| S13_extracted_77919        | 4150  | No  | NA  | 1  | 1  | Not-determined | Genome-fragment | NA |      | 0     |
| S13_extracted_77923        | 1396  | No  | NA  | 0  | 0  | Not-determined | Genome-fragment | NA |      | 0     |
| S13_extracted_77947        | 1612  | No  | NA  | 0  | 1  | Not-determined | Genome-fragment | NA |      | 0     |
| S13_extracted_78009        | 4094  | No  | NA  | 0  | 3  | Not-determined | Genome-fragment | NA |      | 0     |
| S13_extracted_78277        | 1030  | No  | NA  | 0  | 2  | Not-determined | Genome-fragment | NA |      | 0     |
| S14_vs_k141_70375  full    | 1256  | No  | NA  | 1  | 0  | Low-quality    | Genome-fragment | NA | 2.8  | 0     |
| S13_extracted_78386        | 8729  | No  | NA  | 0  | 7  | Not-determined | Genome-fragment | NA |      | 0     |
| S13_extracted_78436        | 1079  | No  | NA  | 0  | 1  | Not-determined | Genome-fragment | NA |      | 0     |
| S13_extracted_78675        | 2265  | No  | NA  | 0  | 2  | Not-determined | Genome-fragment | NA |      | 0     |
| S13_extracted_79092        | 1368  | No  | NA  | 0  | 1  | Not-determined | Genome-fragment | NA |      | 0     |
| S13_extracted_79107        | 2094  | No  | NA  | 0  | 3  | Not-determined | Genome-fragment | NA |      | 0     |
| S13_extracted_79215        | 1290  | No  | NA  | 0  | 1  | Not-determined | Genome-fragment | NA |      | 0     |
| S1_extracted_k141_32196    | 1256  | No  | NA  | 0  | 0  | Low-quality    | Genome-fragment | NA | 0.93 | 0     |
| S13_extracted_79450        | 24684 | No  | NA  | 10 | 10 | Not-determined | Genome-fragment | NA |      | 0     |
| S13_extracted_79483        | 1133  | No  | NA  | 0  | 0  | Not-determined | Genome-fragment | NA |      | 0     |
| S1_vs_k141_95489  full     | 1256  | No  | NA  | 0  | 1  | Low-quality    | Genome-fragment | NA | 0.39 | 0     |
| S13_extracted_79527        | 2353  | No  | NA  | 0  | 0  | Not-determined | Genome-fragment | NA |      | 0     |
| S13_extracted_79555        | 1188  | No  | NA  | 0  | 0  | Not-determined | Genome-fragment | NA |      | 0     |
| S13_extracted_79633        | 1108  | No  | NA  | 0  | 0  | Not-determined | Genome-fragment | NA |      | 0     |
| S13_extracted_79689        | 3765  | No  | NA  | 0  | 1  | Not-determined | Genome-fragment | NA |      | 0     |
| S13_extracted_79713        | 1118  | No  | NA  | 0  | 1  | Not-determined | Genome-fragment | NA |      | 0     |
| S3_vs_k141_111667  full    | 1256  | No  | NA  | 2  | 0  | Low-quality    | Genome-fragment | NA | 2.87 | 0     |
| S13_extracted_79898        | 1227  | No  | NA  | 0  | 1  | Not-determined | Genome-fragment | NA |      | 0     |
| S13_extracted_80065        | 1370  | No  | NA  | 0  | 1  | Not-determined | Genome-fragment | NA |      | 0     |
| S13_extracted_80238        | 3478  | No  | NA  | 0  | 0  | Not-determined | Genome-fragment | NA |      | 0     |
| S5_vs_k141_75054  full     | 1256  | No  | NA  | 0  | 0  | Low-quality    | Genome-fragment | NA | 2.91 | 0     |
| S13_extracted_80378        | 1127  | No  | NA  | 0  | 0  | Not-determined | Genome-fragment | NA |      | 0     |
| S13_extracted_80626        | 2278  | No  | NA  | 0  | 0  | Not-determined | Genome-fragment | NA |      | 0     |
| S13_extracted_80794        | 9918  | No  | NA  | 0  | 3  | Not-determined | Genome-fragment | NA |      | 0     |
| S13_extracted_80933        | 1742  | No  | NA  | 0  | 0  | Not-determined | Genome-fragment | NA |      | 0     |
| S13_extracted_81124        | 1155  | No  | NA  | 0  | 0  | Not-determined | Genome-fragment | NA |      | 0     |
| S13_extracted_81283        | 1831  | No  | NA  | 0  | 1  | Not-determined | Genome-fragment | NA |      | 0     |
| S13_extracted_81406        | 4038  | No  | NA  | 0  | 1  | Not-determined | Genome-fragment | NA |      | 0     |
| S13_extracted_81471        | 1257  | No  | NA  | 0  | 1  | Not-determined | Genome-fragment | NA |      | 0     |
| S13_extracted_81557        | 1176  | No  | NA  | 0  | 1  | Not-determined | Genome-fragment | NA |      | 0     |
| S13_extracted_81658        | 1117  | No  | NA  | 0  | 0  | Not-determined | Genome-fragment | NA |      | 0     |
| S7_vs_k141_102374  full    | 1256  | No  | NA  | 0  | 0  | Low-quality    | Genome-fragment | NA | 2.12 | 0     |
| S13_extracted_81703        | 1008  | No  | NA  | 0  | 1  | Not-determined | Genome-fragment | NA |      | 0     |
| S13_extracted_81707        | 1327  | No  | NA  | 0  | 1  | Not-determined | Genome-fragment | NA |      | 0     |
| S13_extracted_81765        | 2046  | No  | NA  | 0  | 0  | Not-determined | Genome-fragment | NA |      | 0     |
| S13_extracted_81881        | 7757  | No  | NA  | 0  | 1  | Not-determined | Genome-fragment | NA |      | 0     |
| S16_extracted_125527       | 1256  | No  | NA  | 0  | 0  | Low-quality    | Genome-fragment | NA | 1.07 | 0     |
| S13_extracted_82089        | 4443  | No  | NA  | 0  | 2  | Not-determined | Genome-fragment | NA |      | 0     |
| S13_extracted_82154        | 1147  | No  | NA  | 0  | 0  | Not-determined | Genome-fragment | NA |      | 0     |
| S13_extracted_82326        | 1387  | No  | NA  | 0  | 0  | Not-determined | Genome-fragment | NA |      | 0     |
| S13_extracted_82348        | 1417  | No  | NA  | 0  | 1  | Not-determined | Genome-fragment | NA |      | 0     |
| S13_extracted_82355        | 1202  | No  | NA  | 0  | 1  | Not-determined | Genome-fragment | NA |      | 0     |
| S13_extracted_82368        | 1117  | No  | NA  | 0  | 1  | Not-determined | Genome-fragment | NA |      | 0     |
| S16_vs_k141_10984  full    | 1256  | No  | NA  | 0  | 1  | Low-quality    | Genome-fragment | NA | 0.47 | 0     |
| S13_extracted_82762        | 1795  | No  | NA  | 0  | 1  | Not-determined | Genome-fragment | NA |      | 0     |
| S13_extracted_83038        | 1140  | No  | NA  | 0  | 0  | Not-determined | Genome-fragment | NA |      | 0     |
| S13_extracted_83303        | 1066  | No  | NA  | 0  | 0  | Not-determined | Genome-fragment | NA |      | 0     |
| S13_extracted_83540        | 1248  | No  | NA  | 0  | 1  | Not-determined | Genome-fragment | NA |      | 0     |
| S13_extracted_83747        | 1231  | No  | NA  | 0  | 0  | Not-determined | Genome-fragment | NA |      | 0     |
| S13_extracted_83803        | 1064  | No  | NA  | 0  | 0  | Not-determined | Genome-fragment | NA |      | 0     |
| S13_extracted_83808        | 1687  | No  | NA  | 0  | 0  | Not-determined | Genome-fragment | NA |      | 0     |
| S13_extracted_83847        | 1535  | No  | NA  | 0  | 0  | Not-determined | Genome-fragment | NA |      | 0     |
| S13_extracted_83872        | 1164  | No  | NA  | 0  | 1  | Not-determined | Genome-fragment | NA |      | 0     |
| S13_extracted_83932        | 1131  | No  | NA  | 0  | 0  | Not-determined | Genome-fragment | NA |      | 0     |
| S13_extracted_83959        | 1244  | No  | NA  | 0  | 1  | Not-determined | Genome-fragment | NA |      | 0     |
| S16_vs_k141_155970  full   | 1256  | No  | NA  | 0  | 0  | Low-quality    | Genome-fragment | NA | 0.9  | 0     |
| S13_extracted_84102        | 1378  | No  | NA  | 0  | 0  | Not-determined | Genome-fragment | NA |      | 0     |



|                             |       |    |    |    |   |                |                 |    |       |   |
|-----------------------------|-------|----|----|----|---|----------------|-----------------|----|-------|---|
| S13_extracted_87601         | 1735  | No | NA | 0  | 1 | Not-determined | Genome-fragment | NA |       | 0 |
| S13_extracted_87873         | 38348 | No | NA | 10 | 1 | Not-determined | Genome-fragment | NA | 84.63 | 0 |
| S13_extracted_87952         | 1120  | No | NA | 0  | 1 | Not-determined | Genome-fragment | NA |       | 0 |
| S9_vs_k141_4192  full       | 1257  | No | NA | 2  | 0 | Low-quality    | Genome-fragment | NA | 2.97  | 0 |
| S13_extracted_88021         | 1249  | No | NA | 0  | 1 | Not-determined | Genome-fragment | NA |       | 0 |
| S14_vs_k141_737371  full    | 1257  | No | NA | 1  | 0 | Low-quality    | Genome-fragment | NA | 2.17  | 0 |
| S13_extracted_88235         | 1015  | No | NA | 0  | 0 | Not-determined | Genome-fragment | NA |       | 0 |
| S14_vs_k141_95921  full     | 1257  | No | NA | 0  | 0 | Low-quality    | Genome-fragment | NA | 1.18  | 0 |
| S13_extracted_88479         | 1582  | No | NA | 1  | 1 | Not-determined | Genome-fragment | NA |       | 0 |
| S13_extracted_88871         | 2213  | No | NA | 0  | 0 | Not-determined | Genome-fragment | NA |       | 0 |
| S1_vs_k141_58270  full      | 1257  | No | NA | 1  | 0 | Low-quality    | Genome-fragment | NA | 2.91  | 0 |
| S13_extracted_89182         | 1633  | No | NA | 0  | 0 | Not-determined | Genome-fragment | NA |       | 0 |
| S13_extracted_89247         | 3819  | No | NA | 0  | 1 | Not-determined | Genome-fragment | NA |       | 0 |
| S13_extracted_89262         | 4236  | No | NA | 0  | 1 | Not-determined | Genome-fragment | NA |       | 0 |
| S13_extracted_89409         | 2277  | No | NA | 0  | 1 | Not-determined | Genome-fragment | NA |       | 0 |
| S13_extracted_89412         | 1133  | No | NA | 0  | 1 | Not-determined | Genome-fragment | NA |       | 0 |
| S13_extracted_89432         | 3569  | No | NA | 0  | 3 | Not-determined | Genome-fragment | NA |       | 0 |
| S13_extracted_89476         | 1034  | No | NA | 0  | 0 | Not-determined | Genome-fragment | NA |       | 0 |
| S5_vs_k141_71156  full      | 1257  | No | NA | 0  | 0 | Low-quality    | Genome-fragment | NA | 2.64  | 0 |
| S5_vs_k141_102939  full     | 1257  | No | NA | 0  | 0 | Low-quality    | Genome-fragment | NA | 1.53  | 0 |
| S13_extracted_90239         | 1502  | No | NA | 0  | 2 | Not-determined | Genome-fragment | NA |       | 0 |
| S5_vs_k141_50056  lit2gene  | 1257  | No | NA | 1  | 0 | Low-quality    | Genome-fragment | NA | 2.83  | 0 |
| S13_extracted_90364         | 2349  | No | NA | 0  | 2 | Not-determined | Genome-fragment | NA |       | 0 |
| S13_extracted_90794         | 1062  | No | NA | 0  | 1 | Not-determined | Genome-fragment | NA |       | 0 |
| S13_extracted_90904         | 4356  | No | NA | 0  | 1 | Not-determined | Genome-fragment | NA |       | 0 |
| S13_extracted_91133         | 1037  | No | NA | 0  | 2 | Not-determined | Genome-fragment | NA |       | 0 |
| S13_extracted_91189         | 13057 | No | NA | 4  | 0 | High-quality   | Genome-fragment | NA | 95.48 | 0 |
| S13_extracted_91229         | 1327  | No | NA | 0  | 1 | Not-determined | Genome-fragment | NA |       | 0 |
| S13_extracted_91252         | 1014  | No | NA | 0  | 1 | Not-determined | Genome-fragment | NA |       | 0 |
| S13_extracted_91576         | 1175  | No | NA | 0  | 1 | Not-determined | Genome-fragment | NA |       | 0 |
| S13_extracted_91625         | 1351  | No | NA | 0  | 1 | Not-determined | Genome-fragment | NA |       | 0 |
| S13_extracted_91653         | 3776  | No | NA | 2  | 2 | Not-determined | Genome-fragment | NA |       | 0 |
| S13_extracted_91710         | 1089  | No | NA | 0  | 1 | Not-determined | Genome-fragment | NA |       | 0 |
| S13_extracted_91789         | 1044  | No | NA | 0  | 1 | Not-determined | Genome-fragment | NA |       | 0 |
| S7_extracted_40879          | 1257  | No | NA | 1  | 0 | Low-quality    | Genome-fragment | NA | 0.87  | 0 |
| S7_vs_107961  full          | 1257  | No | NA | 0  | 0 | Low-quality    | Genome-fragment | NA | 3.25  | 0 |
| S13_extracted_91939         | 3015  | No | NA | 0  | 2 | Not-determined | Genome-fragment | NA |       | 0 |
| S10_extracted_20110         | 1257  | No | NA | 0  | 0 | Low-quality    | Genome-fragment | NA | 2.58  | 0 |
| S13_extracted_91986         | 1381  | No | NA | 1  | 1 | Not-determined | Genome-fragment | NA |       | 0 |
| S13_extracted_92008         | 1292  | No | NA | 0  | 0 | Not-determined | Genome-fragment | NA |       | 0 |
| S13_extracted_92143         | 8774  | No | NA | 0  | 2 | Not-determined | Genome-fragment | NA |       | 0 |
| S13_extracted_92159         | 1194  | No | NA | 0  | 0 | Not-determined | Genome-fragment | NA |       | 0 |
| S10_extracted_54661         | 1257  | No | NA | 0  | 1 | Low-quality    | Genome-fragment | NA | 0.44  | 0 |
| S13_extracted_92401         | 1993  | No | NA | 0  | 1 | Not-determined | Genome-fragment | NA |       | 0 |
| S13_extracted_92448         | 1371  | No | NA | 0  | 2 | Not-determined | Genome-fragment | NA |       | 0 |
| S13_extracted_92452         | 1415  | No | NA | 0  | 1 | Not-determined | Genome-fragment | NA |       | 0 |
| S13_extracted_92525         | 5294  | No | NA | 0  | 0 | Not-determined | Genome-fragment | NA |       | 0 |
| S13_extracted_92555         | 1098  | No | NA | 0  | 1 | Not-determined | Genome-fragment | NA |       | 0 |
| S12_extracted_k141_16808    | 1257  | No | NA | 0  | 0 | Low-quality    | Genome-fragment | NA | 3.23  | 0 |
| S13_extracted_92813         | 1223  | No | NA | 0  | 0 | Not-determined | Genome-fragment | NA |       | 0 |
| S13_extracted_92924         | 1347  | No | NA | 0  | 1 | Not-determined | Genome-fragment | NA |       | 0 |
| S12_extracted_93038         | 1246  | No | NA | 0  | 0 | Not-determined | Genome-fragment | NA |       | 0 |
| S13_extracted_93060         | 1735  | No | NA | 0  | 6 | Not-determined | Genome-fragment | NA |       | 0 |
| S13_extracted_93220         | 1029  | No | NA | 0  | 0 | Not-determined | Genome-fragment | NA |       | 0 |
| S12_vs_k141_166066  full    | 1257  | No | NA | 1  | 0 | Low-quality    | Genome-fragment | NA | 2.43  | 0 |
| S13_extracted_93329         | 1082  | No | NA | 0  | 0 | Not-determined | Genome-fragment | NA |       | 0 |
| S12_vs_k141_82504  lit2gene | 1257  | No | NA | 1  | 0 | Low-quality    | Genome-fragment | NA | 2.09  | 0 |
| S15_vs_57503  full          | 1257  | No | NA | 3  | 0 | Low-quality    | Genome-fragment | NA | 3.15  | 0 |
| S13_extracted_93976         | 1453  | No | NA | 0  | 1 | Not-determined | Genome-fragment | NA |       | 0 |
| S13_extracted_94041         | 2304  | No | NA | 0  | 0 | Not-determined | Genome-fragment | NA |       | 0 |
| S13_extracted_94050         | 1054  | No | NA | 0  | 1 | Not-determined | Genome-fragment | NA |       | 0 |
| S6_vs_k141_35194  full      | 1257  | No | NA | 0  | 0 | Low-quality    | Genome-fragment | NA | 1.76  | 0 |
| S13_extracted_94221         | 1640  | No | NA | 0  | 1 | Not-determined | Genome-fragment | NA |       | 0 |
| S13_extracted_94349         | 1168  | No | NA | 0  | 0 | Not-determined | Genome-fragment | NA |       | 0 |
| S13_extracted_94403         | 2386  | No | NA | 1  | 1 | Not-determined | Genome-fragment | NA |       | 0 |
| S8_vs_k141_177881  full     | 1257  | No | NA | 0  | 1 | Low-quality    | Genome-fragment | NA | 0.92  | 0 |
| S13_extracted_94529         | 1028  | No | NA | 0  | 1 | Not-determined | Genome-fragment | NA |       | 0 |
| S13_extracted_94588         | 1123  | No | NA | 0  | 0 | Not-determined | Genome-fragment | NA |       | 0 |
| S13_extracted_94618         | 5304  | No | NA | 0  | 1 | Not-determined | Genome-fragment | NA |       | 0 |
| S13_extracted_94854         | 1439  | No | NA | 0  | 3 | Not-determined | Genome-fragment | NA |       | 0 |
| S13_extracted_94945         | 7259  | No | NA | 0  | 1 | Not-determined | Genome-fragment | NA |       | 0 |
| S8_vs_k141_68099  full      | 1257  | No | NA | 0  | 0 | Low-quality    | Genome-fragment | NA | 1.85  | 0 |
| S13_extracted_95036         | 1011  | No | NA | 0  | 2 | Not-determined | Genome-fragment | NA |       | 0 |
| S13_extracted_95107         | 1056  | No | NA | 0  | 0 | Not-determined | Genome-fragment | NA |       | 0 |
| S14_extracted_k141_9601     | 1258  | No | NA | 0  | 0 | Low-quality    | Genome-fragment | NA | 3.67  | 0 |
| S14_vs_k141_102235  full    | 1258  | No | NA | 0  | 0 | Low-quality    | Genome-fragment | NA | 3.2   | 0 |
| S13_extracted_95548         | 1401  | No | NA | 0  | 2 | Not-determined | Genome-fragment | NA |       | 0 |
| S1_vs_k141_150050  full     | 1258  | No | NA | 0  | 0 | Low-quality    | Genome-fragment | NA | 2.81  | 0 |
| S13_extracted_95868         | 1168  | No | NA | 0  | 2 | Not-determined | Genome-fragment | NA |       | 0 |
| S13_extracted_96205         | 1640  | No | NA | 0  | 2 | Not-determined | Genome-fragment | NA |       | 0 |
| S13_extracted_k141_7336     | 1258  | No | NA | 0  | 0 | Low-quality    | Genome-fragment | NA | 2.05  | 0 |
| S13_extracted_96326         | 6011  | No | NA | 0  | 2 | Not-determined | Genome-fragment | NA |       | 0 |
| S13_extracted_96646         | 1012  | No | NA | 0  | 0 | Not-determined | Genome-fragment | NA |       | 0 |
| S3_vs_k141_56451  full      | 1258  | No | NA | 0  | 0 | Low-quality    | Genome-fragment | NA | 3.37  | 0 |
| S13_extracted_96889         | 1009  | No | NA | 0  | 0 | Not-determined | Genome-fragment | NA |       | 0 |
| S13_extracted_97175         | 4831  | No | NA | 0  | 3 | Not-determined | Genome-fragment | NA |       | 0 |
| S13_extracted_97386         | 1080  | No | NA | 0  | 0 | Not-determined | Genome-fragment | NA |       | 0 |
| S13_extracted_97520         | 1095  | No | NA | 0  | 1 | Not-determined | Genome-fragment | NA |       | 0 |
| S5_extracted_k141_110972    | 1258  | No | NA | 0  | 0 | Low-quality    | Genome-fragment | NA | 1.98  | 0 |
| S13_extracted_97612         | 1324  | No | NA | 0  | 0 | Not-determined | Genome-fragment | NA |       | 0 |
| S5_extracted_k141_136558    | 1258  | No | NA | 0  | 0 | Low-quality    | Genome-fragment | NA | 0.62  | 0 |
| S13_extracted_97678         | 1017  | No | NA | 0  | 0 | Not-determined | Genome-fragment | NA |       | 0 |
| S13_extracted_97702         | 16409 | No | NA | 7  | 0 | Complete       | Genome-fragment | NA | 100   | 0 |
| S13_extracted_97950         | 2297  | No | NA | 0  | 2 | Not-determined | Genome-fragment | NA |       | 0 |
| S13_extracted_98168         | 1023  | No | NA | 1  | 1 | Not-determined | Genome-fragment | NA |       | 0 |
| S13_extracted_98187         | 4579  | No | NA | 0  | 4 | Not-determined | Genome-fragment | NA |       | 0 |
| S13_extracted_98335         | 1343  | No | NA | 0  | 1 | Not-determined | Genome-fragment | NA |       | 0 |
| S5_vs_k141_118645  full     | 1258  | No | NA | 0  | 0 | Low-quality    | Genome-fragment | NA | 2.36  | 0 |
| S13_extracted_98478         | 1079  | No | NA | 0  | 1 | Not-determined | Genome-fragment | NA |       | 0 |
| S13_extracted_98499         | 1392  | No | NA | 0  | 1 | Not-determined | Genome-fragment | NA |       | 0 |
| S13_extracted_99191         | 1186  | No | NA | 0  | 1 | Not-determined | Genome-fragment | NA |       | 0 |
| S13_extracted_99197         | 4582  | No | NA | 0  | 1 | Not-determined | Genome-fragment | NA |       | 0 |
| S13_extracted_99469         | 3884  | No | NA | 0  | 2 | Not-determined | Genome-fragment | NA |       | 0 |
| S13_extracted_99590         | 4465  | No | NA | 0  | 1 | Not-determined | Genome-fragment | NA |       | 0 |
| S13_extracted_99745         | 1562  | No | NA | 0  | 1 | Not-determined | Genome-fragment | NA |       | 0 |
| S13_extracted_99858         | 3420  | No | NA | 0  | 2 | Not-determined | Genome-fragment | NA |       | 0 |
| S13_extracted_99965         | 1594  | No | NA | 0  | 2 | Not-determined | Genome-fragment | NA |       | 0 |
| S13_extracted_100155        | 1743  | No | NA | 0  | 3 | Not-determined | Genome-fragment | NA |       | 0 |
| S13_extracted_100161        | 1126  | No | NA | 0  | 0 | Not-determined | Genome-fragment | NA |       | 0 |
| S13_extracted_100335        | 2389  | No | NA | 0  | 1 | Not-determined | Genome-fragment | NA |       | 0 |
| S13_extracted_100565        | 1669  | No | NA | 0  | 1 | Not-determined | Genome-fragment | NA |       | 0 |
| S13_extracted_100584        | 2490  | No | NA | 0  | 1 | Not-determined | Genome-fragment | NA |       | 0 |
| S7_extracted_53064          | 1258  | No | NA | 1  | 0 | Low-quality    | Genome-fragment | NA | 4.15  | 0 |
| S13_extracted_101065        | 4539  | No | NA | 0  | 2 | Not-determined | Genome-fragment | NA |       | 0 |
| S13_extracted_101153        | 2006  | No | NA | 2  | 2 | Not-determined | Genome-fragment | NA |       | 0 |
| S16_vs_50425  full          | 1258  | No | NA | 1  | 0 | Low-quality    | Genome-fragment | NA | 2.15  | 0 |
| S16_vs_126823  full         | 1258  | No | NA | 0  | 1 | Low-quality    | Genome-fragment | NA | 0.76  | 0 |
| S12_extracted_101568        | 1221  | No | NA | 0  | 1 | Not-determined | Genome-fragment | NA |       | 0 |
| S13_extracted_101593        | 1077  | No | NA | 0  | 1 | Not-determined | Genome-fragment | NA |       | 0 |
| S13_extracted_101654        | 1162  | No | NA | 0  | 0 | Not-determined | Genome-fragment | NA |       | 0 |
| S13_extracted_101739        | 2211  | No | NA | 0  | 2 | Not-determined | Genome-fragment | NA |       | 0 |
| S13_extracted_101861        | 5952  | No | NA | 0  | 1 | Not-determined | Genome-fragment | NA |       | 0 |
| S13_extracted_102007        | 1034  | No | NA | 0  | 0 | Not-determined | Genome-fragment | NA |       | 0 |
| S13_extracted_102027        | 3246  | No | NA | 0  | 1 | Not-determined | Genome-fragment | NA |       | 0 |
| S13_extracted_102212        | 1072  | No | NA | 0  | 0 | Not-determined | Genome-fragment | NA |       | 0 |
| S13_extracted_102321        | 1136  | No | NA | 0  | 2 | Not-determined | Genome-fragment | NA |       | 0 |
| S13_extracted_102363        | 1159  | No | NA | 0  | 0 | Not-determined | Genome-fragment | NA |       | 0 |
| S13_extracted_102587        | 3393  | No | NA | 0  | 0 | Not-determined | Genome-fragment | NA |       | 0 |
| S16_vs_164949  lit2gene     | 1258  | No | NA | 1  | 0 | Low-quality    | Genome-fragment | NA | 2.55  | 0 |
| S13_extracted_102752        | 1163  | No | NA | 0  | 1 | Not-determined | Genome-fragment | NA |       | 0 |
| S10_vs_52896  full          | 1258  | No | NA | 0  | 2 | Low-quality    | Genome-fragment | NA | 0.67  | 0 |
| S13_extracted_103174        | 1007  | No | NA | 0  | 0 | Not-determined | Genome-fragment | NA |       | 0 |
| S13_extracted_103185        | 3318  | No | NA | 0  | 0 | Not-determined | Genome-fragment | NA |       | 0 |
| S13_extracted_103332        | 1116  | No | NA | 0  | 1 | Not-determined | Genome-fragment | NA |       | 0 |
| S13_extracted_103635        | 5862  | No | NA | 0  | 0 | Not-determined | Genome-fragment | NA |       | 0 |
| S13_extracted_103867        | 1288  | No | NA | 0  | 0 | Not-determined | Genome-fragment | NA |       | 0 |
| S13_extracted_104032        | 1196  | No | NA | 0  | 1 | Not-determined | Genome-fragment | NA |       | 0 |
| S12_extracted_k141_17430    | 1258  | No | NA | 0  | 1 | Low-quality    | Genome-fragment | NA | 0.3   | 0 |
| S15_extracted_70581         | 1258  | No | NA | 0  | 2 | Low-quality    | Genome-fragment | NA |       | 0 |
| S13_extracted_104352        | 1775  | No | NA | 0  | 1 | Not-determined | Genome-fragment | NA |       | 0 |
| S13_extracted_104525        | 1177  | No | NA | 0  | 0 | Not-determined | Genome-fragment | NA |       | 0 |
| S13_extracted_104575        | 1228  | No | NA | 0  | 1 | Not-determined | Genome-fragment | NA |       | 0 |
| S9_vs                       |       |    |    |    |   |                |                 |    |       |   |



|                            |       |    |    |    |   |                |                 |      |   |
|----------------------------|-------|----|----|----|---|----------------|-----------------|------|---|
| S16_vs_51659  full         | 1259  | No | NA | 1  | 0 | Low-quality    | Genome-fragment | 2.32 | 0 |
| S13_extracted_108473       | 3128  | No | NA | 0  | 0 | Not-determined | Genome-fragment | NA   | 0 |
| S13_extracted_108559       | 1009  | No | NA | 0  | 0 | Not-determined | Genome-fragment | NA   | 0 |
| S10_vs_68985  full         | 1259  | No | NA | 0  | 0 | Low-quality    | Genome-fragment | 2.36 | 0 |
| S13_extracted_108714       | 1650  | No | NA | 0  | 3 | Not-determined | Genome-fragment | NA   | 0 |
| S12_extracted_k141_136256  | 1259  | No | NA | 0  | 0 | Low-quality    | Genome-fragment | 2.18 | 0 |
| S12_vs_k141_167761  H2gene | 1259  | No | NA | 1  | 0 | Low-quality    | Genome-fragment | 2.06 | 0 |
| S13_extracted_108857       | 1105  | No | NA | 0  | 1 | Not-determined | Genome-fragment | NA   | 0 |
| S13_extracted_108877       | 1477  | No | NA | 0  | 0 | Not-determined | Genome-fragment | NA   | 0 |
| S13_extracted_108898       | 1154  | No | NA | 0  | 1 | Not-determined | Genome-fragment | NA   | 0 |
| S13_extracted_108970       | 1426  | No | NA | 0  | 1 | Not-determined | Genome-fragment | NA   | 0 |
| S13_extracted_109123       | 1458  | No | NA | 0  | 1 | Not-determined | Genome-fragment | NA   | 0 |
| S13_extracted_109235       | 45453 | No | NA | 14 | 0 | Complete       | High-quality    | 100  | 0 |
| S8_extracted_k141_131161   | 1259  | No | NA | 0  | 1 | Low-quality    | Genome-fragment | 0.77 | 0 |
| S8_extracted_k141_207108   | 1259  | No | NA | 2  | 0 | Low-quality    | Genome-fragment | 4.15 | 0 |
| S13_extracted_109446       | 1256  | No | NA | 0  | 0 | Not-determined | Genome-fragment | NA   | 0 |
| S13_extracted_109458       | 1335  | No | NA | 0  | 0 | Not-determined | Genome-fragment | NA   | 0 |
| S12_extracted_109577       | 1369  | No | NA | 0  | 0 | Not-determined | Genome-fragment | NA   | 0 |
| S11_vs_k141_93602  full    | 1260  | No | NA | 0  | 0 | Low-quality    | Genome-fragment | 2    | 0 |
| S13_extracted_109825       | 1069  | No | NA | 0  | 0 | Not-determined | Genome-fragment | NA   | 0 |
| S13_extracted_109869       | 1065  | No | NA | 0  | 1 | Not-determined | Genome-fragment | NA   | 0 |
| S11_vs_k141_83183  H2gene  | 1260  | No | NA | 1  | 0 | Low-quality    | Genome-fragment | 1.67 | 0 |
| S13_extracted_110219       | 1202  | No | NA | 0  | 1 | Not-determined | Genome-fragment | NA   | 0 |
| S13_extracted_110313       | 1442  | No | NA | 0  | 1 | Not-determined | Genome-fragment | NA   | 0 |
| S13_extracted_110345       | 1562  | No | NA | 0  | 1 | Not-determined | Genome-fragment | NA   | 0 |
| S13_extracted_110462       | 3453  | No | NA | 0  | 4 | Not-determined | Genome-fragment | NA   | 0 |
| S13_extracted_110593       | 1133  | No | NA | 0  | 1 | Not-determined | Genome-fragment | NA   | 0 |
| S13_extracted_110670       | 2840  | No | NA | 0  | 3 | Not-determined | Genome-fragment | NA   | 0 |
| S13_extracted_110701       | 1341  | No | NA | 0  | 1 | Not-determined | Genome-fragment | NA   | 0 |
| S13_extracted_110710       | 1688  | No | NA | 0  | 1 | Not-determined | Genome-fragment | NA   | 0 |
| S13_extracted_110747       | 1218  | No | NA | 0  | 1 | Not-determined | Genome-fragment | NA   | 0 |
| S14_extracted_k141_47187   | 1260  | No | NA | 0  | 0 | Low-quality    | Genome-fragment | 4.17 | 0 |
| S13_extracted_110833       | 1072  | No | NA | 0  | 1 | Not-determined | Genome-fragment | NA   | 0 |
| S13_extracted_110855       | 1010  | No | NA | 0  | 0 | Not-determined | Genome-fragment | NA   | 0 |
| S13_extracted_110911       | 2311  | No | NA | 0  | 1 | Not-determined | Genome-fragment | NA   | 0 |
| S13_extracted_111050       | 1077  | No | NA | 0  | 2 | Not-determined | Genome-fragment | NA   | 0 |
| S14_vs_k141_92583  full    | 1260  | No | NA | 0  | 0 | Low-quality    | Genome-fragment | 1.71 | 0 |
| S13_extracted_111207       | 1361  | No | NA | 0  | 2 | Not-determined | Genome-fragment | NA   | 0 |
| S13_extracted_111234       | 3561  | No | NA | 0  | 1 | Not-determined | Genome-fragment | NA   | 0 |
| S13_extracted_111334       | 1693  | No | NA | 0  | 0 | Not-determined | Genome-fragment | NA   | 0 |
| S1_extracted_k141_23259    | 1260  | No | NA | 0  | 0 | Low-quality    | Genome-fragment | 2.2  | 0 |
| S13_extracted_111443       | 1367  | No | NA | 0  | 0 | Not-determined | Genome-fragment | NA   | 0 |
| S3_extracted_k141_42441    | 1260  | No | NA | 0  | 0 | Low-quality    | Genome-fragment | 0.69 | 0 |
| S13_extracted_111860       | 1489  | No | NA | 0  | 1 | Not-determined | Genome-fragment | NA   | 0 |
| S13_extracted_111876       | 2461  | No | NA | 0  | 1 | Not-determined | Genome-fragment | NA   | 0 |
| S13_extracted_111914       | 14845 | No | NA | 28 | 0 | Not-determined | Genome-fragment | NA   | 0 |
| S13_extracted_112004       | 1150  | No | NA | 0  | 1 | Not-determined | Genome-fragment | NA   | 0 |
| S13_extracted_112155       | 1295  | No | NA | 0  | 0 | Not-determined | Genome-fragment | NA   | 0 |
| S13_extracted_112178       | 1383  | No | NA | 0  | 1 | Not-determined | Genome-fragment | NA   | 0 |
| S13_extracted_112423       | 1927  | No | NA | 0  | 1 | Not-determined | Genome-fragment | NA   | 0 |
| S13_extracted_112484       | 2391  | No | NA | 0  | 0 | Not-determined | Genome-fragment | NA   | 0 |
| S12_extracted_112561       | 1101  | No | NA | 0  | 1 | Not-determined | Genome-fragment | NA   | 0 |
| S13_extracted_112625       | 1121  | No | NA | 0  | 2 | Not-determined | Genome-fragment | NA   | 0 |
| S13_extracted_112953       | 1132  | No | NA | 0  | 1 | Not-determined | Genome-fragment | NA   | 0 |
| S12_extracted_113063       | 8805  | No | NA | 0  | 1 | Not-determined | Genome-fragment | NA   | 0 |
| S13_extracted_113237       | 1598  | No | NA | 0  | 0 | Not-determined | Genome-fragment | NA   | 0 |
| S13_extracted_113577       | 1239  | No | NA | 0  | 2 | Not-determined | Genome-fragment | NA   | 0 |
| S13_extracted_114078       | 1024  | No | NA | 0  | 0 | Not-determined | Genome-fragment | NA   | 0 |
| S13_extracted_114153       | 1152  | No | NA | 0  | 1 | Not-determined | Genome-fragment | NA   | 0 |
| S13_extracted_114421       | 1906  | No | NA | 0  | 1 | Not-determined | Genome-fragment | NA   | 0 |
| S13_extracted_114496       | 1535  | No | NA | 0  | 1 | Not-determined | Genome-fragment | NA   | 0 |
| S13_extracted_114766       | 3934  | No | NA | 0  | 1 | Not-determined | Genome-fragment | NA   | 0 |
| S13_extracted_114935       | 1405  | No | NA | 0  | 0 | Not-determined | Genome-fragment | NA   | 0 |
| S13_extracted_115021       | 7179  | No | NA | 0  | 5 | Not-determined | Genome-fragment | NA   | 0 |
| S13_extracted_115047       | 1016  | No | NA | 0  | 0 | Not-determined | Genome-fragment | NA   | 0 |
| S13_extracted_115081       | 1057  | No | NA | 0  | 0 | Not-determined | Genome-fragment | NA   | 0 |
| S13_extracted_115173       | 1414  | No | NA | 0  | 1 | Not-determined | Genome-fragment | NA   | 0 |
| S13_extracted_115373       | 4139  | No | NA | 0  | 0 | Not-determined | Genome-fragment | NA   | 0 |
| S13_extracted_115391       | 4833  | No | NA | 0  | 0 | Not-determined | Genome-fragment | NA   | 0 |
| S3_vs_k141_104569  H2gene  | 1260  | No | NA | 2  | 0 | Low-quality    | Genome-fragment | 3.07 | 0 |
| S13_extracted_115743       | 2103  | No | NA | 0  | 0 | Not-determined | Genome-fragment | NA   | 0 |
| S13_extracted_115818       | 3692  | No | NA | 0  | 1 | Not-determined | Genome-fragment | NA   | 0 |
| S5_extracted_k141_100800   | 1260  | No | NA | 0  | 0 | Low-quality    | Genome-fragment | 3.54 | 0 |
| S13_extracted_116190       | 1491  | No | NA | 0  | 0 | Not-determined | Genome-fragment | NA   | 0 |
| S5_vs_k141_126204  full    | 1260  | No | NA | 0  | 0 | Low-quality    | Genome-fragment | 2.92 | 0 |
| S13_extracted_116383       | 2144  | No | NA | 0  | 3 | Not-determined | Genome-fragment | NA   | 0 |
| S13_extracted_116533       | 1102  | No | NA | 0  | 0 | Not-determined | Genome-fragment | NA   | 0 |
| S13_extracted_116538       | 7022  | No | NA | 0  | 5 | Not-determined | Genome-fragment | NA   | 0 |
| S13_extracted_116830       | 1648  | No | NA | 0  | 0 | Not-determined | Genome-fragment | NA   | 0 |
| S13_extracted_116840       | 2494  | No | NA | 0  | 2 | Not-determined | Genome-fragment | NA   | 0 |
| S13_extracted_116935       | 1563  | No | NA | 0  | 1 | Not-determined | Genome-fragment | NA   | 0 |
| S13_extracted_117035       | 2114  | No | NA | 0  | 1 | Not-determined | Genome-fragment | NA   | 0 |
| S5_vs_k141_46839  full     | 1260  | No | NA | 0  | 0 | Low-quality    | Genome-fragment | 3.17 | 0 |
| S13_extracted_117093       | 1293  | No | NA | 0  | 1 | Not-determined | Genome-fragment | NA   | 0 |
| S13_extracted_117109       | 3553  | No | NA | 0  | 3 | Not-determined | Genome-fragment | NA   | 0 |
| S13_extracted_117175       | 1535  | No | NA | 0  | 2 | Not-determined | Genome-fragment | NA   | 0 |
| S13_extracted_117237       | 7084  | No | NA | 0  | 2 | Not-determined | Genome-fragment | NA   | 0 |
| S13_extracted_117292       | 3362  | No | NA | 0  | 1 | Not-determined | Genome-fragment | NA   | 0 |
| S13_extracted_117317       | 9600  | No | NA | 0  | 0 | Not-determined | Genome-fragment | NA   | 0 |
| S13_extracted_117364       | 3460  | No | NA | 0  | 2 | Not-determined | Genome-fragment | NA   | 0 |
| S13_extracted_117530       | 1351  | No | NA | 0  | 2 | Not-determined | Genome-fragment | NA   | 0 |
| S13_extracted_117580       | 1035  | No | NA | 0  | 1 | Not-determined | Genome-fragment | NA   | 0 |
| S7_vs_74284  full          | 1260  | No | NA | 1  | 0 | Low-quality    | Genome-fragment | 0.88 | 0 |
| S13_extracted_118092       | 1001  | No | NA | 0  | 0 | Not-determined | Genome-fragment | NA   | 0 |
| S13_extracted_118458       | 3076  | No | NA | 0  | 2 | Not-determined | Genome-fragment | NA   | 0 |
| S13_extracted_118613       | 2072  | No | NA | 0  | 0 | Not-determined | Genome-fragment | NA   | 0 |
| S13_extracted_118713       | 1757  | No | NA | 0  | 0 | Not-determined | Genome-fragment | NA   | 0 |
| S13_extracted_118920       | 1023  | No | NA | 0  | 1 | Not-determined | Genome-fragment | NA   | 0 |
| S13_extracted_119018       | 3380  | No | NA | 0  | 0 | Not-determined | Genome-fragment | NA   | 0 |
| S13_extracted_119101       | 1179  | No | NA | 0  | 1 | Not-determined | Genome-fragment | NA   | 0 |
| S13_extracted_119154       | 1232  | No | NA | 0  | 1 | Not-determined | Genome-fragment | NA   | 0 |
| S13_extracted_119240       | 1156  | No | NA | 0  | 1 | Not-determined | Genome-fragment | NA   | 0 |
| S13_extracted_119295       | 1061  | No | NA | 0  | 0 | Not-determined | Genome-fragment | NA   | 0 |
| S13_extracted_119320       | 1271  | No | NA | 0  | 0 | Not-determined | Genome-fragment | NA   | 0 |
| S13_extracted_119397       | 4766  | No | NA | 0  | 3 | Not-determined | Genome-fragment | NA   | 0 |
| S13_extracted_119588       | 6426  | No | NA | 0  | 5 | Not-determined | Genome-fragment | NA   | 0 |
| S13_extracted_119595       | 1246  | No | NA | 0  | 1 | Not-determined | Genome-fragment | NA   | 0 |
| S13_extracted_119750       | 1155  | No | NA | 0  | 1 | Not-determined | Genome-fragment | NA   | 0 |
| S7_vs_79226  full          | 1260  | No | NA | 0  | 0 | Low-quality    | Genome-fragment | 2.17 | 0 |
| S13_extracted_119949       | 1295  | No | NA | 0  | 0 | Not-determined | Genome-fragment | NA   | 0 |
| S13_extracted_119994       | 8479  | No | NA | 0  | 2 | Not-determined | Genome-fragment | NA   | 0 |
| S13_extracted_120023       | 1309  | No | NA | 0  | 1 | Not-determined | Genome-fragment | NA   | 0 |
| S13_extracted_120241       | 2435  | No | NA | 0  | 3 | Not-determined | Genome-fragment | NA   | 0 |
| S13_extracted_120273       | 1214  | No | NA | 0  | 1 | Not-determined | Genome-fragment | NA   | 0 |
| S13_extracted_120391       | 1243  | No | NA | 0  | 1 | Not-determined | Genome-fragment | NA   | 0 |
| S13_extracted_120399       | 1002  | No | NA | 0  | 2 | Not-determined | Genome-fragment | NA   | 0 |
| S13_extracted_120426       | 1157  | No | NA | 0  | 1 | Not-determined | Genome-fragment | NA   | 0 |
| S13_extracted_120429       | 8676  | No | NA | 0  | 1 | Not-determined | Genome-fragment | NA   | 0 |
| S13_extracted_120732       | 1774  | No | NA | 0  | 0 | Not-determined | Genome-fragment | NA   | 0 |
| S13_extracted_120984       | 1588  | No | NA | 0  | 1 | Not-determined | Genome-fragment | NA   | 0 |
| S16_extracted_26284        | 1260  | No | NA | 0  | 1 | Low-quality    | Genome-fragment | 2.54 | 0 |
| S13_extracted_121167       | 1151  | No | NA | 0  | 1 | Not-determined | Genome-fragment | NA   | 0 |
| S13_extracted_1211925      | 1260  | No | NA | 1  | 0 | Low-quality    | Genome-fragment | 3.29 | 0 |
| S13_extracted_121265       | 1000  | No | NA | 0  | 3 | Not-determined | Genome-fragment | NA   | 0 |
| S13_extracted_121288       | 1049  | No | NA | 0  | 0 | Not-determined | Genome-fragment | NA   | 0 |
| S13_extracted_121431       | 1330  | No | NA | 0  | 0 | Not-determined | Genome-fragment | NA   | 0 |
| S10_extracted_43997        | 1260  | No | NA | 0  | 0 | Low-quality    | Genome-fragment | 1.49 | 0 |
| S10_extracted_98594        | 1260  | No | NA | 0  | 0 | Low-quality    | Genome-fragment | 0.62 | 0 |
| S10_vs_52359  full         | 1260  | No | NA | 0  | 0 | Low-quality    | Genome-fragment | 2.6  | 0 |
| S13_extracted_122210       | 7410  | No | NA | 0  | 7 | Not-determined | Genome-fragment | NA   | 0 |
| S6_vs_k141_25105  full     | 1260  | No | NA | 0  | 0 | Low-quality    | Genome-fragment | 2.18 | 0 |
| S13_extracted_122392       | 5301  | No | NA | 0  | 0 | Not-determined | Genome-fragment | NA   | 0 |
| S6_vs_k141_4465  full      | 1260  | No | NA | 0  | 0 | Low-quality    | Genome-fragment | 2.09 | 0 |
| S13_extracted_122580       | 3684  | No | NA | 0  | 0 | Not-determined | Genome-fragment | NA   | 0 |
| S13_extracted_122585       | 1490  | No | NA | 0  | 1 | Not-determined | Genome-fragment | NA   | 0 |
| S13_extracted_122617       | 2298  | No | NA | 0  | 1 | Not-determined | Genome-fragment | NA   | 0 |
| S13_extracted_122673       | 1277  | No | NA | 0  | 0 | Not-determined | Genome-fragment | NA   | 0 |
| S13_extracted_122804       | 1285  | No | NA | 0  | 0 | Not-determined | Genome-fragment | NA   | 0 |
| S13_extracted_122837       | 6382  | No | NA | 0  | 5 | Not-determined | Genome-fragment | NA   | 0 |
| S13_extracted_123025       | 2544  | No | NA | 0  | 2 | Not-determined | Genome-fragment | NA   | 0 |
| S13_extracted_123203       | 1444  | No | NA | 0  | 0 | Not-determined | Genome-fragment | NA   | 0 |
| S6_vs_k141_131161  H2gene  | 1260  | No | NA | 0  | 0 | Low-quality    | Genome-fragment | 2.95 | 0 |
| S13_extracted_123302       | 1019  | No | NA | 0  | 0 | Not-determined | Genome-fragment | NA   | 0 |
| S13_extracted_123367       | 4054  | No | NA | 0  | 2 | Not-determined | Genome-fragment | NA   | 0 |
| S13_extracted_123375       | 2221  | No | NA | 0  | 0 | Not-determined | Genome-fragment | NA   | 0 |
| S13_extracted_123462       | 1186  | No | NA | 0  | 1 | Not-determined | Genome-fragment | NA   | 0 |
| S13_extracted_123490       | 1267  | No | NA | 0  | 1 | Not-determined | Genome-fragment | NA   | 0 |
| S13_extracted_123496       | 1253  | No | NA | 0  | 2 | Not-determined | Genome-fragment | NA   | 0 |
| S11_vs_k141_20007  full    | 1261  | No | NA | 0  | 1 | Low-quality    | Genome-fragment | 0.6  | 0 |
| S13_extracted_123554       | 23    |    |    |    |   |                |                 |      |   |



|                           |       |    |    |   |                |                 |                 |    |       |   |
|---------------------------|-------|----|----|---|----------------|-----------------|-----------------|----|-------|---|
| S13_extracted_125726      | 1671  | No | NA | 0 | 0              | Not-determined  | Genome-fragment | NA |       | 0 |
| S1_vs_k141_12843   full   | 1261  | No | NA | 2 | 0              | Low-quality     | Genome-fragment | NA | 2.18  | 0 |
| S3_vs_k141_41611   full   | 1261  | No | NA | 0 | 1              | Low-quality     | Genome-fragment | NA | 0.72  | 0 |
| S13_extracted_125908      | 1009  | No | NA | 0 | 1              | Not-determined  | Genome-fragment | NA | 0     | 0 |
| S13_extracted_125952      | 1184  | No | NA | 0 | 1              | Not-determined  | Genome-fragment | NA | 0     | 0 |
| S13_extracted_126032      | 1596  | No | NA | 0 | 1              | Not-determined  | Genome-fragment | NA | 0     | 0 |
| S13_extracted_126042      | 1269  | No | NA | 0 | 1              | Not-determined  | Genome-fragment | NA | 0     | 0 |
| S13_extracted_126106      | 4377  | No | NA | 0 | 2              | Not-determined  | Genome-fragment | NA | 0     | 0 |
| S13_extracted_126274      | 1932  | No | NA | 0 | 1              | Not-determined  | Genome-fragment | NA | 0     | 0 |
| S13_extracted_126350      | 1536  | No | NA | 0 | 1              | Not-determined  | Genome-fragment | NA | 0     | 0 |
| S13_extracted_126429      | 1028  | No | NA | 0 | 0              | Not-determined  | Genome-fragment | NA | 0     | 0 |
| S13_extracted_126444      | 2384  | No | NA | 0 | 1              | Not-determined  | Genome-fragment | NA | 0     | 0 |
| S13_extracted_126505      | 1381  | No | NA | 0 | 2              | Not-determined  | Genome-fragment | NA | 0     | 0 |
| S13_extracted_126603      | 1404  | No | NA | 0 | 1              | Not-determined  | Genome-fragment | NA | 0     | 0 |
| S13_extracted_126620      | 1403  | No | NA | 0 | 0              | Not-determined  | Genome-fragment | NA | 0     | 0 |
| S13_extracted_126693      | 1036  | No | NA | 0 | 1              | Not-determined  | Genome-fragment | NA | 0     | 0 |
| S13_extracted_126766      | 2095  | No | NA | 0 | 0              | Not-determined  | Genome-fragment | NA | 0     | 0 |
| S13_extracted_126801      | 1493  | No | NA | 0 | 2              | Not-determined  | Genome-fragment | NA | 0     | 0 |
| S5_vs_k141_17410   full   | 1261  | No | NA | 0 | 0              | Low-quality     | Genome-fragment | NA | 2.19  | 0 |
| S5_vs_k141_58438   H2gme  | 1261  | No | NA | 1 | 0              | Low-quality     | Genome-fragment | NA | 3.33  | 0 |
| S13_extracted_127020      | 2210  | No | NA | 0 | 1              | Not-determined  | Genome-fragment | NA | 0     | 0 |
| S13_extracted_127028      | 3392  | No | NA | 0 | 3              | Not-determined  | Genome-fragment | NA | 0     | 0 |
| S13_extracted_127078      | 1183  | No | NA | 0 | 1              | Not-determined  | Genome-fragment | NA | 0     | 0 |
| S13_extracted_127286      | 1853  | No | NA | 0 | 0              | Not-determined  | Genome-fragment | NA | 0     | 0 |
| S13_extracted_127376      | 1770  | No | NA | 0 | 2              | Not-determined  | Genome-fragment | NA | 0     | 0 |
| S13_extracted_127402      | 1044  | No | NA | 0 | 0              | Not-determined  | Genome-fragment | NA | 0     | 0 |
| S13_extracted_127556      | 1042  | No | NA | 0 | 1              | Not-determined  | Genome-fragment | NA | 0     | 0 |
| S13_extracted_127744      | 2245  | No | NA | 0 | 2              | Not-determined  | Genome-fragment | NA | 0     | 0 |
| S13_extracted_128030      | 1485  | No | NA | 0 | 2              | Not-determined  | Genome-fragment | NA | 0     | 0 |
| S13_extracted_128194      | 1920  | No | NA | 0 | 1              | Not-determined  | Genome-fragment | NA | 0     | 0 |
| S13_extracted_128222      | 3446  | No | NA | 0 | 2              | Not-determined  | Genome-fragment | NA | 0     | 0 |
| S13_extracted_128254      | 1348  | No | NA | 4 | Not-determined | Genome-fragment | NA              | 0  | 0     | 0 |
| S7_vs_16087   full        | 1261  | No | NA | 0 | 0              | Low-quality     | Genome-fragment | NA | 1.85  | 0 |
| S13_extracted_128572      | 6755  | No | NA | 0 | 5              | Not-determined  | Genome-fragment | NA | 0     | 0 |
| S13_extracted_128736      | 6841  | No | NA | 0 | 5              | Not-determined  | Genome-fragment | NA | 0     | 0 |
| S13_extracted_128812      | 2280  | No | NA | 0 | 2              | Not-determined  | Genome-fragment | NA | 0     | 0 |
| S13_extracted_128983      | 2570  | No | NA | 0 | 2              | Not-determined  | Genome-fragment | NA | 0     | 0 |
| S7_vs_54071   full        | 1261  | No | NA | 0 | 0              | Low-quality     | Genome-fragment | NA | 3.01  | 0 |
| S13_extracted_129213      | 1043  | No | NA | 1 | 1              | Not-determined  | Genome-fragment | NA | 0     | 0 |
| S13_extracted_129313      | 1008  | No | NA | 0 | 0              | Not-determined  | Genome-fragment | NA | 0     | 0 |
| S13_extracted_129534      | 6670  | No | NA | 0 | 4              | Not-determined  | Genome-fragment | NA | 0     | 0 |
| S13_extracted_129666      | 4721  | No | NA | 0 | 9              | Not-determined  | Genome-fragment | NA | 0     | 0 |
| S13_extracted_129729      | 1606  | No | NA | 0 | 3              | Not-determined  | Genome-fragment | NA | 0     | 0 |
| S13_extracted_129941      | 2449  | No | NA | 0 | 5              | Not-determined  | Genome-fragment | NA | 0     | 0 |
| S13_extracted_130013      | 3785  | No | NA | 0 | 1              | Not-determined  | Genome-fragment | NA | 0     | 0 |
| S13_extracted_130272      | 1127  | No | NA | 0 | 0              | Not-determined  | Genome-fragment | NA | 0     | 0 |
| S13_extracted_130299      | 3852  | No | NA | 0 | 0              | Not-determined  | Genome-fragment | NA | 0     | 0 |
| S13_extracted_130331      | 9236  | No | NA | 0 | 6              | Not-determined  | Genome-fragment | NA | 0     | 0 |
| S13_extracted_130594      | 1182  | No | NA | 0 | 1              | Not-determined  | Genome-fragment | NA | 0     | 0 |
| S13_extracted_130640      | 1124  | No | NA | 0 | 0              | Not-determined  | Genome-fragment | NA | 0     | 0 |
| S13_extracted_130670      | 1745  | No | NA | 0 | 1              | Not-determined  | Genome-fragment | NA | 0     | 0 |
| S13_extracted_130688      | 1072  | No | NA | 0 | 1              | Not-determined  | Genome-fragment | NA | 0     | 0 |
| S13_extracted_130760      | 2001  | No | NA | 0 | 0              | Not-determined  | Genome-fragment | NA | 0     | 0 |
| S13_extracted_130968      | 1041  | No | NA | 0 | 1              | Not-determined  | Genome-fragment | NA | 0     | 0 |
| S13_extracted_131208      | 12280 | No | NA | 0 | 0              | Medium-quality  | Genome-fragment | NA | 64.98 | 0 |
| S13_extracted_131280      | 1180  | No | NA | 0 | 0              | Not-determined  | Genome-fragment | NA | 0     | 0 |
| S13_extracted_131313      | 1016  | No | NA | 0 | 0              | Not-determined  | Genome-fragment | NA | 0     | 0 |
| S12_vs_k141_21577   full  | 1261  | No | NA | 0 | 0              | Low-quality     | Genome-fragment | NA | 1.81  | 0 |
| S12_vs_k141_47559   H2gme | 1261  | No | NA | 0 | 0              | Low-quality     | Genome-fragment | NA | 2.12  | 0 |
| S6_vs_k141_45266   full   | 1261  | No | NA | 0 | 0              | Low-quality     | Genome-fragment | NA | 3.23  | 0 |
| S13_extracted_131479      | 1423  | No | NA | 0 | 1              | Not-determined  | Genome-fragment | NA | 1.57  | 0 |
| S6_vs_k141_54481   full   | 1261  | No | NA | 0 | 1              | Low-quality     | Genome-fragment | NA | 0     | 0 |
| S13_extracted_131633      | 3054  | No | NA | 0 | 2              | Not-determined  | Genome-fragment | NA | 0     | 0 |
| S13_extracted_131650      | 1076  | No | NA | 0 | 1              | Not-determined  | Genome-fragment | NA | 0     | 0 |
| S13_extracted_131686      | 3741  | No | NA | 0 | 2              | Not-determined  | Genome-fragment | NA | 0     | 0 |
| S13_extracted_131708      | 3127  | No | NA | 0 | 1              | Not-determined  | Genome-fragment | NA | 0     | 0 |
| S13_extracted_131854      | 3813  | No | NA | 0 | 4              | Not-determined  | Genome-fragment | NA | 0     | 0 |
| S13_extracted_131861      | 21298 | No | NA | 0 | 4              | Not-determined  | Genome-fragment | NA | 0     | 0 |
| S13_extracted_131889      | 1720  | No | NA | 0 | 1              | Not-determined  | Genome-fragment | NA | 0     | 0 |
| S13_extracted_132020      | 1163  | No | NA | 0 | 1              | Not-determined  | Genome-fragment | NA | 0     | 0 |
| S13_extracted_132022      | 1143  | No | NA | 0 | 1              | Not-determined  | Genome-fragment | NA | 0     | 0 |
| S8_extracted_1341_155948  | 1261  | No | NA | 0 | 1              | Low-quality     | Genome-fragment | NA | 2.5   | 0 |
| S8_vs_k141_5668   full    | 1261  | No | NA | 0 | 0              | Low-quality     | Genome-fragment | NA | 3.41  | 0 |
| S17_vs_k141_78851   full  | 1262  | No | NA | 0 | 1              | Low-quality     | Genome-fragment | NA | 0.59  | 0 |
| S13_extracted_132198      | 1021  | No | NA | 0 | 0              | Not-determined  | Genome-fragment | NA | 0     | 0 |
| S13_extracted_132372      | 1220  | No | NA | 0 | 1              | Not-determined  | Genome-fragment | NA | 0     | 0 |
| S13_extracted_132407      | 1199  | No | NA | 0 | 0              | Not-determined  | Genome-fragment | NA | 0     | 0 |
| S17_vs_k141_177099   full | 1262  | No | NA | 0 | 2              | Low-quality     | Genome-fragment | NA | 0.59  | 0 |
| S13_extracted_132643      | 1514  | No | NA | 0 | 2              | Not-determined  | Genome-fragment | NA | 0     | 0 |
| S13_extracted_133001      | 1298  | No | NA | 0 | 1              | Not-determined  | Genome-fragment | NA | 0     | 0 |
| S13_extracted_133136      | 5641  | No | NA | 0 | 0              | Not-determined  | Genome-fragment | NA | 0     | 0 |
| S9_vs_k141_67657   full   | 1262  | No | NA | 0 | 0              | Low-quality     | Genome-fragment | NA | 1.63  | 0 |
| S13_extracted_133211      | 1009  | No | NA | 0 | 0              | Not-determined  | Genome-fragment | NA | 0     | 0 |
| S11_extracted_k141_58714  | 1262  | No | NA | 0 | 0              | Low-quality     | Genome-fragment | NA | 2.05  | 0 |
| S13_extracted_133621      | 1395  | No | NA | 0 | 1              | Not-determined  | Genome-fragment | NA | 0     | 0 |
| S13_extracted_122158      | 1262  | No | NA | 0 | 0              | Low-quality     | Genome-fragment | NA | 0.96  | 0 |
| S14_extracted_k141_5033   | 1262  | No | NA | 1 | 0              | Low-quality     | Genome-fragment | NA | 2.82  | 0 |
| S13_extracted_134065      | 1982  | No | NA | 0 | 1              | Not-determined  | Genome-fragment | NA | 2.55  | 0 |
| S3_vs_k141_111350   full  | 1262  | No | NA | 0 | 0              | Low-quality     | Genome-fragment | NA | 2.45  | 0 |
| S3_vs_k141_52350   H2gme  | 1262  | No | NA | 1 | 0              | Low-quality     | Genome-fragment | NA | 2.55  | 0 |
| S13_extracted_134441      | 2928  | No | NA | 0 | 0              | Not-determined  | Genome-fragment | NA | 0     | 0 |
| S13_extracted_134491      | 3308  | No | NA | 0 | 0              | Not-determined  | Genome-fragment | NA | 0     | 0 |
| S13_extracted_134726      | 1227  | No | NA | 0 | 1              | Not-determined  | Genome-fragment | NA | 0     | 0 |
| S13_extracted_134794      | 1742  | No | NA | 0 | 0              | Not-determined  | Genome-fragment | NA | 0     | 0 |
| S13_extracted_134844      | 1562  | No | NA | 0 | 2              | Not-determined  | Genome-fragment | NA | 0     | 0 |
| S13_extracted_135000      | 1414  | No | NA | 0 | 0              | Not-determined  | Genome-fragment | NA | 0     | 0 |
| S13_extracted_135009      | 1051  | No | NA | 0 | 2              | Not-determined  | Genome-fragment | NA | 0     | 0 |
| S13_extracted_135426      | 1963  | No | NA | 0 | 1              | Not-determined  | Genome-fragment | NA | 0     | 0 |
| S5_vs_k141_74521   H2gme  | 1262  | No | NA | 0 | 0              | Low-quality     | Genome-fragment | NA | 2.6   | 0 |
| S13_extracted_135562      | 1036  | No | NA | 0 | 1              | Not-determined  | Genome-fragment | NA | 0     | 0 |
| S13_extracted_135658      | 1214  | No | NA | 0 | 2              | Not-determined  | Genome-fragment | NA | 0     | 0 |
| S13_extracted_135823      | 1146  | No | NA | 0 | 0              | Not-determined  | Genome-fragment | NA | 0     | 0 |
| S13_extracted_135824      | 1374  | No | NA | 0 | 2              | Not-determined  | Genome-fragment | NA | 0     | 0 |
| S13_extracted_135899      | 1788  | No | NA | 0 | 1              | Not-determined  | Genome-fragment | NA | 0     | 0 |
| S13_extracted_135900      | 1302  | No | NA | 0 | 0              | Not-determined  | Genome-fragment | NA | 0     | 0 |
| S13_extracted_135901      | 1125  | No | NA | 0 | 0              | Not-determined  | Genome-fragment | NA | 0     | 0 |
| S13_extracted_135938      | 1089  | No | NA | 0 | 0              | Not-determined  | Genome-fragment | NA | 0     | 0 |
| S13_extracted_136077      | 1424  | No | NA | 0 | 0              | Not-determined  | Genome-fragment | NA | 0     | 0 |
| S13_extracted_136142      | 1090  | No | NA | 0 | 0              | Not-determined  | Genome-fragment | NA | 0     | 0 |
| S13_extracted_136171      | 1764  | No | NA | 0 | 0              | Not-determined  | Genome-fragment | NA | 0     | 0 |
| S13_extracted_136186      | 1203  | No | NA | 0 | 1              | Not-determined  | Genome-fragment | NA | 0     | 0 |
| S7_vs_60829   full        | 1262  | No | NA | 1 | 0              | Low-quality     | Genome-fragment | NA | 3.55  | 0 |
| S13_extracted_136508      | 1334  | No | NA | 0 | 1              | Not-determined  | Genome-fragment | NA | 0     | 0 |
| S13_extracted_136806      | 1561  | No | NA | 0 | 1              | Not-determined  | Genome-fragment | NA | 0     | 0 |
| S8_vs_k141_158171   full  | 1262  | No | NA | 0 | 0              | Low-quality     | Genome-fragment | NA | 0.81  | 0 |
| S8_vs_k141_66903   full   | 1262  | No | NA | 0 | 0              | Low-quality     | Genome-fragment | NA | 1.09  | 0 |
| S13_extracted_137194      | 1252  | No | NA | 0 | 2              | Not-determined  | Genome-fragment | NA | 0     | 0 |
| S13_extracted_137426      | 1371  | No | NA | 0 | 0              | Not-determined  | Genome-fragment | NA | 0     | 0 |
| S14_vs_k141_89302   full  | 1263  | No | NA | 0 | 0              | Low-quality     | Genome-fragment | NA | 2.86  | 0 |
| S13_extracted_137634      | 1121  | No | NA | 0 | 1              | Not-determined  | Genome-fragment | NA | 0     | 0 |
| S14_vs_k141_88930   full  | 1263  | No | NA | 0 | 0              | Low-quality     | Genome-fragment | NA | 2.28  | 0 |
| S13_extracted_138116      | 1779  | No | NA | 0 | 0              | Not-determined  | Genome-fragment | NA | 0     | 0 |
| S1_vs_k141_21038   full   | 1263  | No | NA | 0 | 0              | Low-quality     | Genome-fragment | NA | 2.8   | 0 |
| S13_extracted_138157      | 1327  | No | NA | 0 | 0              | Not-determined  | Genome-fragment | NA | 0     | 0 |
| S13_extracted_138200      | 2163  | No | NA | 0 | 1              | Not-determined  | Genome-fragment | NA | 0     | 0 |
| S13_extracted_138272      | 1155  | No | NA | 0 | 0              | Not-determined  | Genome-fragment | NA | 0     | 0 |
| S13_extracted_138457      | 4326  | No | NA | 0 | 2              | Not-determined  | Genome-fragment | NA | 0     | 0 |
| S13_extracted_138583      | 1521  | No | NA | 0 | 0              | Not-determined  | Genome-fragment | NA | 0     | 0 |
| S13_extracted_138701      | 1028  | No | NA | 0 | 2              | Not-determined  | Genome-fragment | NA | 0     | 0 |
| S13_extracted_139314      | 1027  | No | NA | 0 | 3              | Not-determined  | Genome-fragment | NA | 0     | 0 |
| S13_extracted_139332      | 1567  | No | NA | 0 | 1              | Not-determined  | Genome-fragment | NA | 0     | 0 |
| S13_extracted_139453      | 2441  | No | NA | 0 | 0              | Not-determined  | Genome-fragment | NA | 0     | 0 |
| S13_extracted_139550      | 1497  | No | NA | 0 | 2              | Not-determined  | Genome-fragment | NA | 0     | 0 |
| S3_vs_k141_122910   full  | 1263  | No | NA | 0 | 0              | Low-quality     | Genome-fragment | NA | 1.7   | 0 |
| S5_extracted_k141_443162  | 1263  | No | NA | 0 | 0              | Low-quality     | Genome-fragment | NA | 3.16  | 0 |
| S13_extracted_139924      | 1856  | No | NA | 0 | 1              | Not-determined  | Genome-fragment | NA | 0     | 0 |
| S13_extracted_140062      | 1399  | No | NA | 0 | 1              | Not-determined  | Genome-fragment | NA | 0     | 0 |
| S13_extracted_140136      | 9760  | No | NA | 0 | 2              | Not-determined  | Genome-fragment | NA | 0     | 0 |
| S13_extracted_140199      | 1105  | No |    |   |                |                 |                 |    |       |   |



|                           |        |    |    |    |   |                |                 |                 |       |
|---------------------------|--------|----|----|----|---|----------------|-----------------|-----------------|-------|
| S13_extracted_143846      | 1121   | No | NA | 0  | 1 | Not-determined | Genome-fragment | NA              | 0     |
| S13_extracted_144048      | 1692   | No | NA | 0  | 0 | Not-determined | Genome-fragment | NA              | 0     |
| S13_vs_9701  full         | 1264   | No | NA | 0  | 0 | Low-quality    | Genome-fragment | NA              | 1.08  |
| S13_extracted_144132      | 3181   | No | NA | 0  | 4 | Not-determined | Genome-fragment | NA              | 0     |
| S1_vs_k141_130024  full   | 1264   | No | NA | 0  | 0 | Low-quality    | Genome-fragment | NA              | 3.47  |
| S13_extracted_144367      | 3454   | No | NA | 0  | 4 | Not-determined | Genome-fragment | NA              | 0     |
| S13_extracted_144578      | 1770   | No | NA | 0  | 0 | Not-determined | Genome-fragment | NA              | 0     |
| S13_extracted_144777      | 1583   | No | NA | 0  | 1 | Not-determined | Genome-fragment | NA              | 0     |
| S13_extracted_144902      | 1480   | No | NA | 0  | 1 | Not-determined | Genome-fragment | NA              | 0     |
| S13_extracted_144920      | 9511   | No | NA | 0  | 3 | Not-determined | Genome-fragment | NA              | 0     |
| S1_vs_k141_50975  full    | 1264   | No | NA | 1  | 0 | Low-quality    | Genome-fragment | NA              | 2.36  |
| S13_extracted_145254      | 2069   | No | NA | 0  | 0 | Not-determined | Genome-fragment | NA              | 0     |
| S13_extracted_145421      | 1959   | No | NA | 0  | 2 | Not-determined | Genome-fragment | NA              | 0     |
| S13_extracted_145573      | 2452   | No | NA | 0  | 1 | Not-determined | Genome-fragment | NA              | 0     |
| S13_extracted_145746      | 1119   | No | NA | 0  | 1 | Not-determined | Genome-fragment | NA              | 0     |
| S13_extracted_145859      | 1002   | No | NA | 0  | 1 | Not-determined | Genome-fragment | NA              | 0     |
| S13_extracted_145870      | 1452   | No | NA | 0  | 1 | Not-determined | Genome-fragment | NA              | 0     |
| S13_extracted_145932      | 1380   | No | NA | 0  | 1 | Not-determined | Genome-fragment | NA              | 0     |
| S2_extracted_k141_70558   | 1264   | No | NA | 0  | 0 | Low-quality    | Genome-fragment | NA              | 3.16  |
| S13_extracted_146229      | 1708   | No | NA | 0  | 1 | Not-determined | Genome-fragment | NA              | 0     |
| S13_extracted_146385      | 2155   | No | NA | 0  | 0 | Not-determined | Genome-fragment | NA              | 0     |
| S13_extracted_146437      | 1026   | No | NA | 0  | 1 | Not-determined | Genome-fragment | NA              | 0     |
| S13_extracted_146449      | 1003   | No | NA | 0  | 0 | Not-determined | Genome-fragment | NA              | 0     |
| S13_extracted_146453      | 2273   | No | NA | 0  | 2 | Not-determined | Genome-fragment | NA              | 0     |
| S13_extracted_146550      | 1138   | No | NA | 0  | 0 | Not-determined | Genome-fragment | NA              | 0     |
| S13_extracted_146731      | 1505   | No | NA | 0  | 2 | Not-determined | Genome-fragment | NA              | 0     |
| S13_extracted_146803      | 3541   | No | NA | 0  | 0 | Not-determined | Genome-fragment | NA              | 0     |
| S13_extracted_146808      | 1054   | No | NA | 0  | 0 | Not-determined | Genome-fragment | NA              | 0     |
| S13_extracted_146971      | 1005   | No | NA | 0  | 0 | Not-determined | Genome-fragment | NA              | 0     |
| S5_extracted_k141_136897  | 1264   | No | NA | 0  | 0 | Low-quality    | Genome-fragment | NA              | 2.96  |
| S13_extracted_147094      | 1268   | No | NA | 0  | 0 | Not-determined | Genome-fragment | NA              | 0     |
| S7_vs_68128  full         | 1264   | No | NA | 0  | 0 | Low-quality    | Genome-fragment | NA              | 3.26  |
| S7_vs_63225  H2gene       | 1264   | No | NA | 1  | 0 | Low-quality    | Genome-fragment | NA              | 2.11  |
| S13_extracted_147343      | 1182   | No | NA | 0  | 1 | Not-determined | Genome-fragment | NA              | 0     |
| S13_extracted_147385      | 3535   | No | NA | 0  | 0 | Not-determined | Genome-fragment | NA              | 0     |
| S13_extracted_147396      | 3515   | No | NA | 13 | 1 | Complete       | High-quality    | Genome-fragment | 100   |
| S13_extracted_147469      | 1249   | No | NA | 0  | 1 | Not-determined | Genome-fragment | NA              | 0     |
| S16_extracted_144183      | 1264   | No | NA | 1  | 0 | Low-quality    | Genome-fragment | NA              | 9.1   |
| S16_vs_51731  full        | 1264   | No | NA | 0  | 0 | Low-quality    | Genome-fragment | NA              | 2.09  |
| S13_extracted_147589      | 11817  | No | NA | 2  | 1 | Complete       | High-quality    | Genome-fragment | 100   |
| S13_extracted_147593      | 1755   | No | NA | 0  | 0 | Not-determined | Genome-fragment | NA              | 0     |
| S13_extracted_147649      | 2010   | No | NA | 0  | 1 | Not-determined | Genome-fragment | NA              | 0     |
| S13_extracted_147660      | 1048   | No | NA | 0  | 1 | Not-determined | Genome-fragment | NA              | 0     |
| S13_extracted_147900      | 3661   | No | NA | 0  | 0 | Not-determined | Genome-fragment | NA              | 0     |
| S13_extracted_148054      | 3081   | No | NA | 0  | 0 | Not-determined | Genome-fragment | NA              | 0     |
| S16_vs_138864  full       | 1264   | No | NA | 0  | 0 | Low-quality    | Genome-fragment | NA              | 0.32  |
| S13_extracted_148190      | 1009   | No | NA | 0  | 1 | Not-determined | Genome-fragment | NA              | 0     |
| S16_vs_45769  H2gene      | 1264   | No | NA | 1  | 0 | Low-quality    | Genome-fragment | NA              | 0.87  |
| S13_extracted_148387      | 1006   | No | NA | 0  | 0 | Not-determined | Genome-fragment | NA              | 0     |
| S13_extracted_148631      | 1138   | No | NA | 0  | 0 | Not-determined | Genome-fragment | NA              | 0     |
| S13_extracted_148898      | 1061   | No | NA | 0  | 2 | Not-determined | Genome-fragment | NA              | 0     |
| S13_extracted_149049      | 1074   | No | NA | 0  | 0 | Not-determined | Genome-fragment | NA              | 0     |
| S13_extracted_148978      | 1349   | No | NA | 0  | 1 | Not-determined | Genome-fragment | NA              | 0     |
| S13_extracted_148979      | 1082   | No | NA | 0  | 0 | Not-determined | Genome-fragment | NA              | 0     |
| S12_vs_k141_118784  full  | 1264   | No | NA | 0  | 0 | Low-quality    | Genome-fragment | NA              | 2.78  |
| S13_extracted_149267      | 1437   | No | NA | 0  | 0 | Not-determined | Genome-fragment | NA              | 0     |
| S17_extracted_k141_135066 | 1265   | No | NA | 0  | 0 | Low-quality    | Genome-fragment | NA              | 1.89  |
| S13_extracted_149436      | 1027   | No | NA | 0  | 0 | Not-determined | Genome-fragment | NA              | 2.53  |
| S5_vs_k141_70703  full    | 1265   | No | NA | 0  | 0 | Low-quality    | Genome-fragment | NA              | 0     |
| S13_extracted_11748       | 1265   | No | NA | 1  | 0 | Low-quality    | Genome-fragment | NA              | 3     |
| S13_extracted_149888      | 1152   | No | NA | 0  | 1 | Not-determined | Genome-fragment | NA              | 0     |
| S13_extracted_149903      | 1155   | No | NA | 0  | 1 | Not-determined | Genome-fragment | NA              | 0     |
| S14_extracted_k141_54825  | 1265   | No | NA | 1  | 0 | Low-quality    | Genome-fragment | NA              | 0.87  |
| S13_extracted_150246      | 1380   | No | NA | 0  | 1 | Not-determined | Genome-fragment | NA              | 0     |
| S14_extracted_k141_76885  | 1265   | No | NA | 0  | 0 | Low-quality    | Genome-fragment | NA              | 4.23  |
| S13_extracted_150317      | 3751   | No | NA | 0  | 0 | Not-determined | Genome-fragment | NA              | 0     |
| S13_extracted_150407      | 5403   | No | NA | 0  | 0 | Complete       | High-quality    | Genome-fragment | 100   |
| S13_extracted_150506      | 1176   | No | NA | 0  | 1 | Not-determined | Genome-fragment | NA              | 0     |
| S13_extracted_150601      | 1090   | No | NA | 0  | 1 | Not-determined | Genome-fragment | NA              | 0     |
| S13_extracted_150779      | 1615   | No | NA | 0  | 1 | Not-determined | Genome-fragment | NA              | 0     |
| S1_vs_k141_140360  full   | 1265   | No | NA | 0  | 0 | Low-quality    | Genome-fragment | NA              | 2.14  |
| S13_extracted_151045      | 86139  | No | NA | 17 | 2 | Complete       | High-quality    | Genome-fragment | 100   |
| S13_extracted_151086      | 1639   | No | NA | 0  | 1 | Not-determined | Genome-fragment | NA              | 0     |
| S13_extracted_151312      | 1060   | No | NA | 0  | 0 | Not-determined | Genome-fragment | NA              | 0     |
| S13_extracted_151344      | 1368   | No | NA | 0  | 0 | Not-determined | Genome-fragment | NA              | 0     |
| S13_extracted_151589      | 1298   | No | NA | 0  | 1 | Not-determined | Genome-fragment | NA              | 0     |
| S13_extracted_151697      | 5076   | No | NA | 0  | 0 | Not-determined | Genome-fragment | NA              | 0     |
| S13_extracted_151755      | 43394  | No | NA | 28 | 0 | Complete       | High-quality    | Genome-fragment | 100   |
| S13_extracted_151847      | 6800   | No | NA | 0  | 3 | Not-determined | Genome-fragment | NA              | 0     |
| S13_extracted_151901      | 1286   | No | NA | 0  | 0 | Not-determined | Genome-fragment | NA              | 0     |
| S13_extracted_152065      | 1054   | No | NA | 0  | 1 | Not-determined | Genome-fragment | NA              | 0     |
| S3_extracted_k141_131067  | 1265   | No | NA | 0  | 0 | Low-quality    | Genome-fragment | NA              | 2.16  |
| S3_extracted_k141_2484    | 1265   | No | NA | 1  | 0 | Low-quality    | Genome-fragment | NA              | 0.87  |
| S13_extracted_152250      | 1056   | No | NA | 0  | 1 | Not-determined | Genome-fragment | NA              | 0     |
| S13_extracted_152340      | 1834   | No | NA | 0  | 1 | Not-determined | Genome-fragment | NA              | 0     |
| S13_extracted_152369      | 1114   | No | NA | 0  | 1 | Not-determined | Genome-fragment | NA              | 0     |
| S13_extracted_152435      | 1256   | No | NA | 0  | 0 | Not-determined | Genome-fragment | NA              | 0     |
| S8_extracted_k141_109451  | 1265   | No | NA | 0  | 0 | Low-quality    | Genome-fragment | NA              | 1.02  |
| S13_extracted_152536      | 1752   | No | NA | 0  | 1 | Not-determined | Genome-fragment | NA              | 0     |
| S13_extracted_152747      | 1057   | No | NA | 0  | 1 | Not-determined | Genome-fragment | NA              | 0     |
| S3_extracted_k141_39040   | 1265   | No | NA | 0  | 0 | Low-quality    | Genome-fragment | NA              | 1.63  |
| S13_extracted_153057      | 3638   | No | NA | 0  | 0 | Not-determined | Genome-fragment | NA              | 0     |
| S13_extracted_153076      | 1003   | No | NA | 0  | 0 | Not-determined | Genome-fragment | NA              | 0     |
| S5_vs_k141_132565  full   | 1265   | No | NA | 0  | 0 | Low-quality    | Genome-fragment | NA              | 2.58  |
| S13_extracted_153288      | 1190   | No | NA | 0  | 1 | Not-determined | Genome-fragment | NA              | 0     |
| S7_vs_4807  full          | 1265   | No | NA | 0  | 1 | Low-quality    | Genome-fragment | NA              | 0.71  |
| S13_extracted_153390      | 1145   | No | NA | 0  | 2 | Not-determined | Genome-fragment | NA              | 0     |
| S16_vs_126000  full       | 1265   | No | NA | 0  | 0 | Low-quality    | Genome-fragment | NA              | 2.27  |
| S13_extracted_153526      | 1151   | No | NA | 0  | 1 | Not-determined | Genome-fragment | NA              | 0     |
| S13_extracted_153577      | 1260   | No | NA | 0  | 0 | Not-determined | Genome-fragment | NA              | 0     |
| S13_extracted_153612      | 1133   | No | NA | 0  | 2 | Not-determined | Genome-fragment | NA              | 0     |
| S13_extracted_153622      | 1280   | No | NA | 0  | 1 | Not-determined | Genome-fragment | NA              | 0     |
| S13_extracted_153657      | 1833   | No | NA | 0  | 1 | Not-determined | Genome-fragment | NA              | 0     |
| S10_extracted_113182      | 1265   | No | NA | 1  | 0 | Low-quality    | Genome-fragment | NA              | 3.12  |
| S13_extracted_153743      | 1174   | No | NA | 0  | 2 | Not-determined | Genome-fragment | NA              | 0     |
| S10_vs_16269  full        | 1265   | No | NA | 0  | 0 | Low-quality    | Genome-fragment | NA              | 2.74  |
| S13_extracted_154047      | 1362   | No | NA | 0  | 0 | Not-determined | Genome-fragment | NA              | 0     |
| S13_extracted_154130      | 1152   | No | NA | 0  | 0 | Not-determined | Genome-fragment | NA              | 0     |
| S13_extracted_154245      | 1186   | No | NA | 0  | 0 | Not-determined | Genome-fragment | NA              | 0     |
| S13_vs_5029  full         | 6727   | No | NA | 0  | 3 | Not-determined | Genome-fragment | NA              | 0     |
| S13_vs_12957  full        | 15580  | No | NA | 8  | 0 | Medium-quality | Genome-fragment | NA              | 51    |
| S13_vs_15645  full        | 153823 | No | NA | 18 | 4 | High-quality   | High-quality    | Genome-fragment | 100   |
| S13_vs_27462  full        | 65150  | No | NA | 27 | 4 | Medium-quality | High-quality    | Genome-fragment | 82.87 |
| S13_vs_28316  full        | 3119   | No | NA | 0  | 3 | Not-determined | Genome-fragment | NA              | 0     |
| S13_vs_148294  full       | 43488  | No | NA | 26 | 2 | High-quality   | High-quality    | Genome-fragment | 100   |
| S13_vs_149860  full       | 19576  | No | NA | 8  | 0 | High-quality   | High-quality    | Genome-fragment | 100   |
| S13_vs_150477  full       | 8781   | No | NA | 0  | 3 | Not-determined | Genome-fragment | NA              | 0     |
| S13_vs_151510  full       | 97768  | No | NA | 22 | 0 | High-quality   | High-quality    | Genome-fragment | 98.51 |
| S6_vs_k141_131212  full   | 1265   | No | NA | 1  | 0 | Low-quality    | Genome-fragment | NA              | 2.06  |
| S13_vs_152  full          | 1242   | No | NA | 0  | 2 | Not-determined | Genome-fragment | NA              | 0     |
| S17_extracted_k141_34243  | 1266   | No | NA | 4  | 0 | Low-quality    | Genome-fragment | NA              | 4.16  |
| S13_vs_5021  full         | 1557   | No | NA | 0  | 0 | Not-determined | Genome-fragment | NA              | 0     |
| S13_vs_5087  full         | 1337   | No | NA | 0  | 1 | Not-determined | Genome-fragment | NA              | 0     |
| S13_vs_7021  full         | 2780   | No | NA | 0  | 0 | Not-determined | Genome-fragment | NA              | 0     |
| S13_vs_7631  full         | 2744   | No | NA | 0  | 0 | Not-determined | Genome-fragment | NA              | 0     |
| S13_vs_837  full          | 2915   | No | NA | 0  | 1 | Not-determined | Genome-fragment | NA              | 0     |
| S13_vs_8451  full         | 3137   | No | NA | 0  | 4 | Not-determined | Genome-fragment | NA              | 0     |
| S13_vs_8521  full         | 3813   | No | NA | 0  | 1 | Not-determined | Genome-fragment | NA              | 0     |
| S13_vs_10921  full        | 3269   | No | NA | 0  | 1 | Not-determined | Genome-fragment | NA              | 0     |
| S13_vs_12001  full        | 4539   | No | NA | 0  | 0 | Not-determined | Genome-fragment | NA              | 0     |
| S13_vs_16761  full        | 6275   | No | NA | 0  | 4 | Not-determined | Genome-fragment | NA              | 0     |
| S17_vs_k141_2521  full    | 1266   | No | NA | 0  | 0 | Low-quality    | Genome-fragment | NA              | 2.79  |
| S13_vs_22151  full        | 1171   | No | NA | 0  | 0 | Not-determined | Genome-fragment | NA              | 0     |
| S13_vs_22761  full        | 1216   | No | NA | 0  | 0 | Not-determined | Genome-fragment | NA              | 0     |
| S13_vs_23801  full        | 1505   | No | NA | 0  | 1 | Not-determined | Genome-fragment | NA              | 0     |
| S13_vs_24161  full        | 2071   | No | NA | 0  | 1 | Not-determined | Genome-fragment | NA              | 0     |
| S9_vs_k141_125041  full   | 1266   | No | NA | 0  | 0 | Low-quality    | Genome-fragment | NA              | 2.79  |
| S13_vs_k141_10001  full   | 1266   | No | NA | 0  | 0 | Low-quality    | Genome-fragment | NA              | 2.49  |
| S13_extracted_k141_109899 | 1266   | No | NA | 1  | 0 | Low-quality    | Genome-fragment | NA              | 1.5   |
| S13_vs_28411  full        | 2224   | No | NA | 0  | 0 | Not-determined | Genome-fragment | NA              | 0     |
| S13_extracted_k141_38782  | 1266   | No | NA | 0  | 0 | Low-quality    | Genome-fragment | NA              | 2.11  |
| S13_vs_34231  full        | 2061   | No | NA | 0  | 0 | Not-determined | Genome-fragment | NA              | 0     |
| S13_vs_34881  full        | 1676   | No | NA | 0  | 1 | Not-determined | Genome-fragment | NA              | 0     |
| S5_extracted_k141_132812  | 1266   | No | NA | 0  | 1 | Low-quality    | Genome-fragment | NA              | 2.75  |
| S13_vs_36601  full        | 1569   | No | NA | 0  | 1 | Not-determined | Genome-fragment | NA              | 0     |
| S13_vs_38231  full        | 1310   | No | NA | 0  | 1 | Not-determined | Genome-fragment | NA              | 0     |
| S13_vs_38991  full        | 1676   | No | NA | 0  | 2 | Not-determined | Genome-fragment | NA              | 0     |
| S13_vs_39101  full        | 71167  | No | NA | 18 | 1 | Not-determined | Genome-fragment | NA              | 0     |
| S7_vs_84921  full         | 1266   | No | NA | 2  | 0 |                |                 |                 |       |



|                           |          |       |     |       |    |    |                |                 |       |       |
|---------------------------|----------|-------|-----|-------|----|----|----------------|-----------------|-------|-------|
| S13_v6_6769               | [full]   | 1674  | No  | NA    | 0  | 1  | Not-determined | Genome-fragment | NA    | 0     |
| S13_v6_6794               | [full]   | 6292  | No  | NA    | 5  | 1  | Not-determined | Genome-fragment | NA    | 0     |
| S7_v6_11386               | [full]   | 1267  | No  | NA    | 1  | 0  | Low-quality    | Genome-fragment | 2.36  | 0     |
| S10_extracted_1275        |          | 1267  | No  | NA    | 1  | 0  | Low-quality    | Genome-fragment | 7.05  | 0     |
| S13_v6_7574               | [full]   | 4813  | No  | NA    | 0  | 2  | Not-determined | Genome-fragment | NA    | 0     |
| S13_v6_7581               | [full]   | 1471  | No  | NA    | 0  | 0  | Not-determined | Genome-fragment | NA    | 0     |
| S13_v6_7659               | [full]   | 2718  | No  | NA    | 0  | 0  | Not-determined | Genome-fragment | NA    | 0     |
| S10_v6_7865               | [full]   | 1267  | No  | NA    | 1  | 0  | Low-quality    | Genome-fragment | 1.82  | 0     |
| S13_v6_7862               | [full]   | 1117  | No  | NA    | 1  | 1  | Not-determined | Genome-fragment | NA    | 0     |
| S13_v6_7863               | [full]   | 1658  | No  | NA    | 0  | 0  | Not-determined | Genome-fragment | NA    | 0     |
| S15_v6_1482               | [H2gene] | 1267  | No  | NA    | 2  | 0  | Low-quality    | Genome-fragment | 3.36  | 0     |
| S13_v6_7911               | [full]   | 1196  | No  | NA    | 0  | 0  | Not-determined | Genome-fragment | NA    | 0     |
| S13_v6_7963               | [full]   | 3195  | No  | NA    | 0  | 1  | Not-determined | Genome-fragment | NA    | 0     |
| S13_v6_7970               | [full]   | 1100  | No  | NA    | 0  | 0  | Not-determined | Genome-fragment | NA    | 0     |
| S13_v6_8070               | [full]   | 3385  | No  | NA    | 0  | 1  | Not-determined | Genome-fragment | NA    | 0     |
| S8_v6_1414_48567          | [full]   | 1267  | No  | NA    | 0  | 1  | Low-quality    | Genome-fragment | 4.34  | 0     |
| S13_v6_8259               | [full]   | 1671  | No  | NA    | 0  | 1  | Not-determined | Genome-fragment | NA    | 0     |
| S13_v6_8262               | [full]   | 5396  | No  | NA    | 0  | 1  | Not-determined | Genome-fragment | NA    | 0     |
| S17_v6_1414_84245         | [full]   | 1268  | No  | NA    | 0  | 0  | Low-quality    | Genome-fragment | 2.26  | 0     |
| S13_extracted_94955       |          | 1268  | No  | NA    | 0  | 0  | Low-quality    | Genome-fragment | 2.38  | 0     |
| S14_extracted_k141_66485  |          | 1268  | No  | NA    | 4  | 0  | Low-quality    | Genome-fragment | 4.18  | 0     |
| S13_v6_8785               | [full]   | 1604  | No  | NA    | 0  | 0  | Not-determined | Genome-fragment | NA    | 0     |
| S13_v6_8788               | [full]   | 1256  | No  | NA    | 0  | 2  | Not-determined | Genome-fragment | NA    | 0     |
| S13_v6_8817               | [full]   | 1618  | No  | NA    | 0  | 1  | Not-determined | Genome-fragment | NA    | 0     |
| S14_v6_1414_15080         | [full]   | 1268  | No  | NA    | 0  | 0  | Low-quality    | Genome-fragment | 0.75  | 0     |
| S1_v6_1414_18324          | [full]   | 1268  | No  | NA    | 0  | 0  | Low-quality    | Genome-fragment | 0.72  | 0     |
| S13_v6_9055               | [full]   | 4684  | No  | NA    | 0  | 0  | Not-determined | Genome-fragment | NA    | 0     |
| S13_v6_9066               | [full]   | 2726  | No  | NA    | 0  | 0  | Not-determined | Genome-fragment | NA    | 0     |
| S13_v6_9438               | [full]   | 21269 | Yes | 27620 | 0  | 2  | Medium-quality | Genome-fragment | 68.61 | 14.41 |
| S13_v6_9631               | [full]   | 2059  | No  | NA    | 0  | 2  | Not-determined | Genome-fragment | NA    | 0     |
| S13_v6_9653               | [full]   | 2171  | No  | NA    | 0  | 2  | Not-determined | Genome-fragment | NA    | 0     |
| S3_extracted_k141_50767   |          | 1268  | No  | NA    | 0  | 0  | Low-quality    | Genome-fragment | 2.91  | 0     |
| S13_v6_9751               | [full]   | 2512  | No  | NA    | 0  | 0  | Not-determined | Genome-fragment | NA    | 0     |
| S13_v6_9791               | [full]   | 2136  | No  | NA    | 0  | 2  | Not-determined | Genome-fragment | NA    | 0     |
| S6_v6_1414_14111          | [full]   | 1268  | No  | NA    | 0  | 1  | Low-quality    | Genome-fragment | 2.19  | 0     |
| S13_v6_9896               | [full]   | 2767  | No  | NA    | 0  | 1  | Not-determined | Genome-fragment | NA    | 0     |
| S13_v6_10001              | [full]   | 1313  | No  | NA    | 0  | 1  | Not-determined | Genome-fragment | NA    | 0     |
| S13_v6_10334              | [full]   | 1585  | No  | NA    | 0  | 1  | Not-determined | Genome-fragment | NA    | 0     |
| S7_v6_101554              | [full]   | 1268  | No  | NA    | 0  | 0  | Low-quality    | Genome-fragment | 2.61  | 0     |
| S13_v6_10518              | [full]   | 1370  | No  | NA    | 0  | 0  | Not-determined | Genome-fragment | NA    | 0     |
| S13_v6_10995              | [full]   | 1638  | No  | NA    | 0  | 1  | Not-determined | Genome-fragment | NA    | 0     |
| S13_v6_10999              | [full]   | 1683  | No  | NA    | 0  | 1  | Not-determined | Genome-fragment | NA    | 0     |
| S16_extracted_109420      |          | 1268  | No  | NA    | 0  | 0  | Low-quality    | Genome-fragment | 0.61  | 0     |
| S13_v6_11653              | [full]   | 1935  | No  | NA    | 0  | 1  | Not-determined | Genome-fragment | NA    | 0     |
| S16_v6_9781               | [full]   | 1268  | No  | NA    | 0  | 1  | Low-quality    | Genome-fragment | 3.5   | 0     |
| S13_v6_11809              | [full]   | 1258  | No  | NA    | 0  | 0  | Not-determined | Genome-fragment | NA    | 0     |
| S13_v6_11917              | [full]   | 1280  | No  | NA    | 0  | 1  | Not-determined | Genome-fragment | NA    | 0     |
| S13_v6_12015              | [full]   | 3839  | No  | NA    | 0  | 3  | Not-determined | Genome-fragment | NA    | 0     |
| S13_v6_12037              | [full]   | 1234  | No  | NA    | 0  | 2  | Not-determined | Genome-fragment | NA    | 0     |
| S13_v6_12198              | [full]   | 2353  | No  | NA    | 0  | 2  | Not-determined | Genome-fragment | NA    | 0     |
| S13_v6_12215              | [full]   | 1148  | No  | NA    | 0  | 0  | Not-determined | Genome-fragment | NA    | 0     |
| S12_extracted_k141_52007  |          | 1268  | No  | NA    | 0  | 1  | Low-quality    | Genome-fragment | 0.91  | 0     |
| S12_v6_1414_5711          | [full]   | 1268  | No  | NA    | 1  | 0  | Low-quality    | Genome-fragment | 3.21  | 0     |
| S13_v6_12406              | [full]   | 1870  | No  | NA    | 0  | 0  | Not-determined | Genome-fragment | NA    | 0     |
| S13_v6_12724              | [full]   | 3972  | No  | NA    | 0  | 1  | Not-determined | Genome-fragment | NA    | 0     |
| S12_v6_1414_143011        | [full]   | 1268  | No  | NA    | 0  | 1  | Low-quality    | Genome-fragment | 2.35  | 0     |
| S13_v6_12867              | [full]   | 1608  | No  | NA    | 0  | 1  | Not-determined | Genome-fragment | NA    | 0     |
| S6_v6_1414_14085          | [H2gene] | 1268  | No  | NA    | 1  | 0  | Low-quality    | Genome-fragment | 3.25  | 0     |
| S8_extracted_k141_124513  |          | 1268  | No  | NA    | 0  | 0  | Low-quality    | Genome-fragment | 1.92  | 0     |
| S13_v6_13129              | [full]   | 34076 | No  | NA    | 13 | 1  | High-quality   | High-quality    | 99.76 | 0     |
| S13_v6_13498              | [full]   | 1021  | No  | NA    | 0  | 2  | Not-determined | Genome-fragment | NA    | 0     |
| S11_v6_1414_19919         | [full]   | 1269  | No  | NA    | 0  | 0  | Low-quality    | Genome-fragment | 1.07  | 0     |
| S13_v6_13710              | [full]   | 1196  | No  | NA    | 0  | 1  | Not-determined | Genome-fragment | NA    | 0     |
| S13_v6_13825              | [full]   | 4706  | No  | NA    | 0  | 1  | Not-determined | Genome-fragment | NA    | 0     |
| S11_v6_1414_20580         | [full]   | 1269  | No  | NA    | 0  | 0  | Low-quality    | Genome-fragment | 3.35  | 0     |
| S13_v6_14086              | [full]   | 1467  | No  | NA    | 0  | 1  | Not-determined | Genome-fragment | NA    | 0     |
| S13_v6_14117              | [full]   | 3311  | No  | NA    | 0  | 0  | Not-determined | Genome-fragment | NA    | 0     |
| S13_v6_14207              | [full]   | 1665  | No  | NA    | 0  | 0  | Not-determined | Genome-fragment | NA    | 0     |
| S13_v6_18285              | [H2gene] | 1269  | No  | NA    | 0  | 0  | Low-quality    | Genome-fragment | 27.17 | 0     |
| S13_v6_14701              | [full]   | 2400  | No  | NA    | 0  | 0  | Not-determined | Genome-fragment | NA    | 0     |
| S13_v6_14774              | [full]   | 8676  | No  | NA    | 0  | 1  | Not-determined | Genome-fragment | NA    | 0     |
| S13_v6_14794              | [full]   | 36336 | No  | NA    | 0  | 0  | Medium-quality | Genome-fragment | 88.55 | 0     |
| S7_v6_7907                | [H2gene] | 1269  | No  | NA    | 1  | 0  | Low-quality    | Genome-fragment | 2.65  | 0     |
| S13_v6_14981              | [full]   | 3969  | No  | NA    | 0  | 2  | Not-determined | Genome-fragment | NA    | 0     |
| S16_extracted_5210        |          | 1269  | No  | NA    | 0  | 0  | Low-quality    | Genome-fragment | 1.54  | 0     |
| S12_v6_1414_130005        | [full]   | 1269  | No  | NA    | 0  | 0  | Low-quality    | Genome-fragment | 0.83  | 0     |
| S13_v6_15162              | [full]   | 1392  | No  | NA    | 0  | 0  | Not-determined | Genome-fragment | NA    | 0     |
| S6_v6_1414_12443          | [full]   | 1269  | No  | NA    | 0  | 0  | Low-quality    | Genome-fragment | 0.81  | 0     |
| S13_v6_15450              | [full]   | 1287  | No  | NA    | 0  | 0  | Not-determined | Genome-fragment | NA    | 0     |
| S13_v6_15502              | [full]   | 4554  | No  | NA    | 0  | 4  | Not-determined | Genome-fragment | NA    | 0     |
| S13_v6_15781              | [full]   | 1119  | No  | NA    | 0  | 2  | Not-determined | Genome-fragment | NA    | 0     |
| S13_v6_15800              | [full]   | 2613  | No  | NA    | 0  | 2  | Not-determined | Genome-fragment | NA    | 0     |
| S13_v6_16063              | [full]   | 1371  | No  | NA    | 0  | 2  | Not-determined | Genome-fragment | NA    | 0     |
| S13_v6_16168              | [full]   | 8163  | No  | NA    | 0  | 1  | Not-determined | Genome-fragment | NA    | 0     |
| S17_v6_1414_14016         | [full]   | 1270  | No  | NA    | 0  | 0  | Low-quality    | Genome-fragment | 1.9   | 0     |
| S13_v6_16282              | [full]   | 1653  | No  | NA    | 0  | 1  | Not-determined | Genome-fragment | NA    | 0     |
| S17_v6_1414_42127         | [full]   | 1270  | No  | NA    | 0  | 0  | Low-quality    | Genome-fragment | 1.84  | 0     |
| S9_extracted_k141_41203   |          | 1270  | No  | NA    | 2  | 0  | Low-quality    | Genome-fragment | 4.17  | 0     |
| S13_v6_16572              | [full]   | 1519  | No  | NA    | 0  | 0  | Not-determined | Genome-fragment | NA    | 0     |
| S11_v6_1414_72248         | [full]   | 1270  | No  | NA    | 0  | 0  | Low-quality    | Genome-fragment | 1.52  | 0     |
| S14_extracted_k141_108111 |          | 1270  | No  | NA    | 1  | 0  | Low-quality    | Genome-fragment | 2.78  | 0     |
| S3_extracted_k141_33605   |          | 1270  | No  | NA    | 0  | 0  | Low-quality    | Genome-fragment | 1.22  | 0     |
| S3_extracted_k141_105613  |          | 1270  | No  | NA    | 2  | 0  | Low-quality    | Genome-fragment | 2.87  | 0     |
| S3_v6_1414_101610         | [full]   | 1270  | No  | NA    | 1  | 0  | Low-quality    | Genome-fragment | 1.84  | 0     |
| S13_v6_17289              | [full]   | 4552  | No  | NA    | 0  | 0  | Not-determined | Genome-fragment | NA    | 0     |
| S3_v6_1414_110559         | [H2gene] | 1270  | No  | NA    | 0  | 1  | Low-quality    | Genome-fragment | 3.62  | 0     |
| S7_v6_91455               | [full]   | 1270  | No  | NA    | 0  | 0  | Low-quality    | Genome-fragment | 2.44  | 0     |
| S13_v6_17712              | [full]   | 1909  | No  | NA    | 0  | 0  | Not-determined | Genome-fragment | NA    | 0     |
| S16_extracted_63446       |          | 1270  | No  | NA    | 0  | 0  | Low-quality    | Genome-fragment | 2.89  | 0     |
| S13_v6_18143              | [full]   | 1296  | No  | NA    | 0  | 1  | Not-determined | Genome-fragment | NA    | 0     |
| S13_v6_18161              | [full]   | 1236  | No  | NA    | 0  | 0  | Not-determined | Genome-fragment | NA    | 0     |
| S16_extracted_513782      |          | 1270  | No  | NA    | 0  | 2  | Low-quality    | Genome-fragment | 3.32  | 0     |
| S13_v6_18217              | [full]   | 1330  | No  | NA    | 0  | 0  | Not-determined | Genome-fragment | NA    | 0     |
| S13_v6_18318              | [full]   | 1932  | No  | NA    | 0  | 0  | Not-determined | Genome-fragment | NA    | 0     |
| S13_v6_18429              | [full]   | 5542  | No  | NA    | 0  | 1  | Not-determined | Genome-fragment | NA    | 0     |
| S13_v6_18535              | [full]   | 1503  | No  | NA    | 0  | 2  | Not-determined | Genome-fragment | NA    | 0     |
| S10_v6_68477              | [full]   | 1270  | No  | NA    | 0  | 1  | Low-quality    | Genome-fragment | 0.94  | 0     |
| S13_v6_18613              | [full]   | 4301  | No  | NA    | 0  | 2  | Not-determined | Genome-fragment | NA    | 0     |
| S13_v6_18691              | [full]   | 3367  | No  | NA    | 0  | 0  | Not-determined | Genome-fragment | NA    | 0     |
| S13_v6_18744              | [full]   | 1399  | No  | NA    | 0  | 0  | Not-determined | Genome-fragment | NA    | 0     |
| S6_v6_1414_14578          | [full]   | 1270  | No  | NA    | 0  | 0  | Low-quality    | Genome-fragment | 1.71  | 0     |
| S6_v6_1414_13968          | [H2gene] | 1270  | No  | NA    | 0  | 0  | Low-quality    | Genome-fragment | 1.82  | 0     |
| S13_v6_19256              | [full]   | 1004  | No  | NA    | 0  | 1  | Not-determined | Genome-fragment | NA    | 0     |
| S9_extracted_k141_57744   |          | 1271  | No  | NA    | 0  | 0  | Low-quality    | Genome-fragment | 4.32  | 0     |
| S9_v6_1414_65216          | [full]   | 1271  | No  | NA    | 0  | 0  | Low-quality    | Genome-fragment | 2.09  | 0     |
| S11_v6_1414_5456          | [full]   | 1271  | No  | NA    | 0  | 1  | Low-quality    | Genome-fragment | 3.49  | 0     |
| S13_v6_19692              | [full]   | 3107  | No  | NA    | 0  | 3  | Not-determined | Genome-fragment | NA    | 0     |
| S14_extracted_k141_114032 |          | 1271  | No  | NA    | 1  | 1  | Low-quality    | Genome-fragment | 0.69  | 0     |
| S13_v6_19784              | [full]   | 1529  | No  | NA    | 0  | 2  | Not-determined | Genome-fragment | NA    | 0     |
| S13_v6_19808              | [full]   | 35526 | No  | NA    | 0  | 22 | Not-determined | Genome-fragment | NA    | 0     |
| S13_v6_19880              | [full]   | 1874  | No  | NA    | 0  | 1  | Not-determined | Genome-fragment | NA    | 0     |
| S13_v6_19951              | [full]   | 1895  | No  | NA    | 0  | 2  | Not-determined | Genome-fragment | NA    | 0     |
| S13_v6_20101              | [full]   | 2539  | No  | NA    | 0  | 3  | Not-determined | Genome-fragment | NA    | 0     |
| S14_v6_1414_2009          | [full]   | 1271  | No  | NA    | 0  | 0  | Low-quality    | Genome-fragment | 2.94  | 0     |
| S12_v6_20167              | [full]   | 4851  | No  | NA    | 0  | 4  | Not-determined | Genome-fragment | NA    | 0     |
| S13_v6_20171              | [full]   | 1095  | No  | NA    | 0  | 0  | Not-determined | Genome-fragment | NA    | 0     |
| S1_extracted_k141_8547    |          | 1271  | No  | NA    | 0  | 1  | Low-quality    | Genome-fragment | 0.84  | 0     |
| S13_v6_20301              | [full]   | 3358  | No  | NA    | 0  | 2  | Not-determined | Genome-fragment | NA    | 0     |
| S5_extracted_k141_159161  |          | 1271  | No  | NA    | 0  | 0  | Low-quality    | Genome-fragment | 1.61  | 0     |
| S13_v6_20790              | [full]   | 1686  | No  | NA    | 0  | 2  | Not-determined | Genome-fragment | NA    | 0     |
| S13_v6_21614              | [full]   | 1892  | No  | NA    | 0  | 1  | Not-determined | Genome-fragment | NA    | 0     |
| S13_v6_21657              | [full]   | 2644  | No  | NA    | 0  | 0  | Not-determined | Genome-fragment | NA    | 0     |
| S5_v6_1414_44843          | [full]   | 1271  | No  | NA    | 0  | 0  | Low-quality    | Genome-fragment | 0.38  | 0     |
| S13_v6_21844              | [full]   | 1085  | No  | NA    | 0  | 0  | Not-determined | Genome-fragment | NA    | 0     |
| S13_v6_21924              | [full]   | 4702  | No  | NA    | 0  | 3  | Not-determined | Genome-fragment | NA    | 0     |
| S13_v6_22455              | [full]   | 1831  | No  | NA    | 0  | 0  | Not-determined | Genome-fragment | NA    | 0     |
| S13_v6_22476              | [full]   | 2178  | No  | NA    | 0  | 0  | Not-determined | Genome-fragment | NA    | 0     |
| S5_v6_1414_9038           | [full]   | 1271  | No  | NA    | 0  | 0  | Low-quality    | Genome-fragment | 0.99  | 0     |
| S13_v6_22748              | [full]   | 1645  | No  | NA    | 0  | 1  | Not-determined | Genome-fragment | NA    | 0     |
| S7_extracted_17219        |          | 1271  | No  | NA    |    |    |                |                 |       |       |



|                           |        |        |     |    |       |    |                |                 |                 |       |       |
|---------------------------|--------|--------|-----|----|-------|----|----------------|-----------------|-----------------|-------|-------|
| S14_vx_k141_41343         | t2gene | 1272   | No  | NA | 1     | 0  | Low-quality    | Genome-fragment | 30.57           | 0     |       |
| S13_vx_26900              |        | 2817   | No  | NA | 1     | 0  | Not-determined | Genome-fragment | NA              | 0     |       |
| S13_vx_26909              | full   | 2375   | No  | NA | 0     | 2  | Not-determined | Genome-fragment | NA              | 0     |       |
| S13_vx_27107              | full   | 3604   | No  | NA | 0     | 0  | Not-determined | Genome-fragment | NA              | 0     |       |
| S13_vx_27115              | full   | 1120   | No  | NA | 0     | 1  | Not-determined | Genome-fragment | NA              | 0     |       |
| S3_extracted_k141_105316  |        | 1272   | No  | NA | 1     | 0  | Low-quality    | Genome-fragment | 2.9             | 0     |       |
| S3_extracted_k141_106628  |        | 1272   | No  | NA | 0     | 0  | Low-quality    | Genome-fragment | 3.62            | 0     |       |
| S13_vx_27427              | full   | 4793   | No  | NA | 0     | 0  | Not-determined | Genome-fragment | NA              | 0     |       |
| S13_vx_27534              | full   | 1311   | No  | NA | 0     | 0  | Not-determined | Genome-fragment | NA              | 0     |       |
| S13_vx_27539              | full   | 3445   | No  | NA | 0     | 2  | Not-determined | Genome-fragment | NA              | 0     |       |
| S13_vx_27659              | full   | 1448   | No  | NA | 0     | 0  | Not-determined | Genome-fragment | NA              | 0     |       |
| S13_vx_27698              | full   | 7994   | No  | NA | 0     | 4  | Not-determined | Genome-fragment | NA              | 0     |       |
| S7_extracted_97666        |        | 1272   | No  | NA | 0     | 1  | Low-quality    | Genome-fragment | 2.53            | 0     |       |
| S7_vx_68816               | t2gene | 1272   | No  | NA | 1     | 0  | Low-quality    | Genome-fragment | 5.68            | 0     |       |
| S16_extracted_41443       |        | 1272   | No  | NA | 0     | 1  | Low-quality    | Genome-fragment | 0.2             | 0     |       |
| S16_vx_18265              | full   | 1272   | No  | NA | 1     | 0  | Not-determined | Genome-fragment | 2.41            | 0     |       |
| S13_vx_29089              | full   | 2228   | No  | NA | 0     | 2  | Not-determined | Genome-fragment | NA              | 0     |       |
| S10_vx_56444              | full   | 1272   | No  | NA | 0     | 0  | Low-quality    | Genome-fragment | 0.93            | 0     |       |
| S6_vx_k141_15721          | t2gene | 1272   | No  | NA | 1     | 0  | Low-quality    | Genome-fragment | 3.65            | 0     |       |
| S13_vx_29425              | full   | 1430   | No  | NA | 0     | 0  | Not-determined | Genome-fragment | NA              | 0     |       |
| S8_extracted_k141_5867    |        | 1272   | No  | NA | 2     | 0  | Low-quality    | Genome-fragment | 3.5             | 0     |       |
| S13_vx_29974              | full   | 1729   | No  | NA | 0     | 0  | Not-determined | Genome-fragment | NA              | 0     |       |
| S13_vx_29985              | full   | 8122   | No  | NA | 0     | 5  | Not-determined | Genome-fragment | NA              | 0     |       |
| S13_vx_30080              | full   | 1967   | No  | NA | 0     | 1  | Not-determined | Genome-fragment | NA              | 0     |       |
| S13_vx_30101              | full   | 113152 | Yes | NA | 23    | 27 | Medium-quality | Genome-fragment | 77.39           | 67.43 |       |
| S13_vx_30167              | full   | 62048  | Yes | NA | 25    | 9  | High-quality   | High-quality    | 100             | 12.8  |       |
| S13_vx_30241              | full   | 6511   | No  | NA | 0     | 1  | Not-determined | Genome-fragment | NA              | 0     |       |
| S13_vx_30515              | full   | 2537   | No  | NA | 0     | 2  | Not-determined | Genome-fragment | NA              | 0     |       |
| S17_extracted_k141_36613  |        | 1273   | No  | NA | 0     | 0  | Low-quality    | Genome-fragment | 2.33            | 0     |       |
| S13_vx_30709              | full   | 2376   | No  | NA | 0     | 1  | Not-determined | Genome-fragment | NA              | 0     |       |
| S13_vx_31033              | full   | 1197   | No  | NA | 0     | 0  | Not-determined | Genome-fragment | NA              | 0     |       |
| S13_vx_31065              | full   | 1808   | No  | NA | 1     | 1  | Not-determined | Genome-fragment | NA              | 0     |       |
| S9_extracted_k141_10271   |        | 1273   | No  | NA | 2     | 0  | Low-quality    | Genome-fragment | 1.8             | 0     |       |
| S14_extracted_k141_112565 |        | 1273   | No  | NA | 0     | 1  | Low-quality    | Genome-fragment | 2.83            | 0     |       |
| S13_vx_11461              | full   | 5566   | No  | NA | 0     | 4  | Not-determined | Genome-fragment | NA              | 0     |       |
| S1_vx_k141_10607          | full   | 1273   | No  | NA | 0     | 0  | Low-quality    | Genome-fragment | 3.01            | 0     |       |
| S13_vx_31824              | full   | 3787   | No  | NA | 0     | 1  | Not-determined | Genome-fragment | NA              | 0     |       |
| S13_vx_12037              | full   | 2702   | No  | NA | 0     | 1  | Not-determined | Genome-fragment | NA              | 0     |       |
| S3_extracted_k141_139562  |        | 1273   | No  | NA | 1     | 1  | Low-quality    | Genome-fragment | 0.95            | 0     |       |
| S13_vx_32150              | full   | 2088   | No  | NA | 0     | 3  | Not-determined | Genome-fragment | NA              | 0     |       |
| S13_vx_32488              | full   | 1283   | No  | NA | 0     | 1  | Not-determined | Genome-fragment | NA              | 0     |       |
| S2_vx_k141_97595          | full   | 1273   | No  | NA | 0     | 0  | Low-quality    | Genome-fragment | 1.61            | 0     |       |
| S5_vx_k141_118041         | full   | 1273   | No  | NA | 2     | 0  | Low-quality    | Genome-fragment | 2.71            | 0     |       |
| S13_vx_33145              | full   | 6217   | No  | NA | 0     | 1  | Not-determined | Genome-fragment | NA              | 0     |       |
| S13_vx_33417              | full   | 1719   | No  | NA | 0     | 1  | Not-determined | Genome-fragment | NA              | 0     |       |
| S13_vx_33558              | full   | 2852   | No  | NA | 0     | 0  | Not-determined | Genome-fragment | NA              | 0     |       |
| S13_vx_33645              | full   | 1705   | No  | NA | 0     | 1  | Not-determined | Genome-fragment | NA              | 0     |       |
| S5_vx_k141_77180          | full   | 1273   | No  | NA | 0     | 1  | Low-quality    | Genome-fragment | 0.55            | 0     |       |
| S7_extracted_112181       |        | 1273   | No  | NA | 0     | 0  | Low-quality    | Genome-fragment | 2.71            | 0     |       |
| S7_vx_47861               | full   | 1273   | No  | NA | 0     | 0  | Low-quality    | Genome-fragment | 0.88            | 0     |       |
| S13_vx_33947              | full   | 86062  | Yes | NA | 28387 | 5  | 43             | Medium-quality  | Genome-fragment | 70.13 | 67.02 |
| S7_vx_95051               | full   | 1273   | No  | NA | 0     | 2  | Low-quality    | Genome-fragment | 0.68            | 0     |       |
| S16_vx_21212              | full   | 1273   | No  | NA | 0     | 0  | Low-quality    | Genome-fragment | 0.81            | 0     |       |
| S13_vx_34111              | full   | 2130   | No  | NA | 0     | 2  | Not-determined | Genome-fragment | NA              | 0     |       |
| S16_vx_115477             | full   | 1273   | No  | NA | 0     | 0  | Low-quality    | Genome-fragment | 2.46            | 0     |       |
| S13_vx_34344              | full   | 1650   | No  | NA | 0     | 0  | Not-determined | Genome-fragment | NA              | 0     |       |
| S2_vx_k141_171020         | full   | 1273   | No  | NA | 0     | 0  | Low-quality    | Genome-fragment | 3.51            | 0     |       |
| S13_vx_34512              | full   | 2406   | No  | NA | 0     | 1  | Not-determined | Genome-fragment | NA              | 0     |       |
| S13_vx_34627              | full   | 1243   | No  | NA | 0     | 0  | Not-determined | Genome-fragment | NA              | 0     |       |
| S12_vx_k141_56846         | t2gene | 1273   | No  | NA | 0     | 0  | Low-quality    | Genome-fragment | 2.28            | 0     |       |
| S2_vx_k141_13092          | full   | 1273   | No  | NA | 1     | 0  | Low-quality    | Genome-fragment | 3.24            | 0     |       |
| S13_vx_35130              | full   | 1807   | No  | NA | 0     | 0  | Not-determined | Genome-fragment | NA              | 0     |       |
| S6_vx_k141_39180          | full   | 1273   | No  | NA | 0     | 0  | Low-quality    | Genome-fragment | 1.92            | 0     |       |
| S13_vx_35347              | full   | 1027   | No  | NA | 0     | 0  | Not-determined | Genome-fragment | NA              | 0     |       |
| S13_vx_35464              | full   | 1080   | No  | NA | 3     | 3  | Not-determined | Genome-fragment | NA              | 0     |       |
| S8_extracted_k141_139681  |        | 1273   | No  | NA | 0     | 0  | Low-quality    | Genome-fragment | 4.05            | 0     |       |
| S8_extracted_k141_186517  |        | 1273   | No  | NA | 0     | 1  | Low-quality    | Genome-fragment | 0.73            | 0     |       |
| S13_vx_35816              | full   | 57224  | Yes | NA | 42012 | 22 | 6              | Complete        | High-quality    | 100   | 26.58 |
| S13_vx_36251              | full   | 1342   | No  | NA | 0     | 1  | Not-determined | Genome-fragment | NA              | 0     |       |
| S9_vx_k141_13557          | full   | 1274   | No  | NA | 2     | 0  | Low-quality    | Genome-fragment | 2.68            | 0     |       |
| S11_vx_k141_31199         | full   | 1274   | No  | NA | 0     | 0  | Low-quality    | Genome-fragment | 0.86            | 0     |       |
| S13_vx_36460              | full   | 1409   | No  | NA | 1     | 1  | Not-determined | Genome-fragment | NA              | 0     |       |
| S11_vx_k141_89650         | t2gene | 1274   | No  | NA | 1     | 0  | Low-quality    | Genome-fragment | 1.13            | 0     |       |
| S14_vx_k141_41042         | t2gene | 1274   | No  | NA | 2     | 0  | Low-quality    | Genome-fragment | 2.9             | 0     |       |
| S5_extracted_k141_67469   |        | 1274   | No  | NA | 0     | 0  | Low-quality    | Genome-fragment | 0.75            | 0     |       |
| S13_vx_36932              | full   | 1837   | No  | NA | 0     | 1  | Not-determined | Genome-fragment | NA              | 0     |       |
| S13_vx_37340              | full   | 1639   | No  | NA | 0     | 0  | Not-determined | Genome-fragment | NA              | 0     |       |
| S16_extracted_48525       |        | 1274   | No  | NA | 2     | 0  | Low-quality    | Genome-fragment | 2.04            | 0     |       |
| S16_vx_50031              | full   | 1274   | No  | NA | 0     | 0  | Low-quality    | Genome-fragment | 1.84            | 0     |       |
| S16_vx_142672             | full   | 1274   | No  | NA | 0     | 0  | Low-quality    | Genome-fragment | 3.03            | 0     |       |
| S13_vx_37851              | full   | 2622   | No  | NA | 0     | 0  | Not-determined | Genome-fragment | NA              | 0     |       |
| S13_vx_38096              | full   | 1629   | No  | NA | 1     | 1  | Not-determined | Genome-fragment | NA              | 0     |       |
| S13_vx_38153              | full   | 6669   | No  | NA | 0     | 5  | Not-determined | Genome-fragment | NA              | 0     |       |
| S13_vx_38187              | full   | 2343   | No  | NA | 0     | 1  | Not-determined | Genome-fragment | NA              | 0     |       |
| S12_vx_k141_68813         | full   | 1274   | No  | NA | 0     | 0  | Low-quality    | Genome-fragment | 0.87            | 0     |       |
| S12_vx_k141_170128        | full   | 1274   | No  | NA | 0     | 2  | Low-quality    | Genome-fragment | 1.22            | 0     |       |
| S13_vx_38579              | full   | 2034   | No  | NA | 0     | 1  | Not-determined | Genome-fragment | NA              | 0     |       |
| S6_extracted_k141_8670    |        | 1274   | No  | NA | 0     | 0  | Low-quality    | Genome-fragment | 1.54            | 0     |       |
| S13_vx_38664              | full   | 4569   | No  | NA | 2     | 2  | Not-determined | Genome-fragment | NA              | 0     |       |
| S8_vx_k141_125699         | full   | 4569   | No  | NA | 2     | 0  | Low-quality    | Genome-fragment | 2.1             | 0     |       |
| S8_vx_k141_179418         | full   | 1274   | No  | NA | 0     | 0  | Low-quality    | Genome-fragment | 2.47            | 0     |       |
| S13_vx_39274              | full   | 1820   | No  | NA | 0     | 0  | Not-determined | Genome-fragment | NA              | 0     |       |
| S13_vx_39245              | full   | 1204   | No  | NA | 0     | 1  | Not-determined | Genome-fragment | NA              | 0     |       |
| S17_extracted_k141_134651 |        | 1275   | No  | NA | 0     | 1  | Low-quality    | Genome-fragment | 3.22            | 0     |       |
| S13_vx_39536              | full   | 2782   | No  | NA | 1     | 1  | Not-determined | Genome-fragment | NA              | 0     |       |
| S14_vx_k141_18853         | full   | 1275   | No  | NA | 1     | 0  | Low-quality    | Genome-fragment | 3               | 0     |       |
| S13_vx_39702              | full   | 2408   | No  | NA | 0     | 1  | Not-determined | Genome-fragment | NA              | 0     |       |
| S13_vx_39800              | full   | 1161   | No  | NA | 0     | 1  | Not-determined | Genome-fragment | NA              | 0     |       |
| S13_vx_39884              | full   | 5523   | No  | NA | 0     | 0  | Not-determined | Genome-fragment | NA              | 0     |       |
| S13_vx_39954              | full   | 2284   | No  | NA | 0     | 1  | Not-determined | Genome-fragment | NA              | 0     |       |
| S13_vx_40008              | full   | 3203   | No  | NA | 0     | 1  | Not-determined | Genome-fragment | NA              | 0     |       |
| S13_vx_40041              | full   | 1300   | No  | NA | 0     | 2  | Not-determined | Genome-fragment | NA              | 0     |       |
| S1_extracted_k141_154648  |        | 1275   | No  | NA | 1     | 0  | Low-quality    | Genome-fragment | 0.82            | 0     |       |
| S11_extracted_k141_56493  | full   | 1275   | No  | NA | 0     | 0  | Low-quality    | Genome-fragment | 2.99            | 0     |       |
| S13_vx_40526              | full   | 1707   | No  | NA | 1     | 1  | Not-determined | Genome-fragment | NA              | 0     |       |
| S3_vx_k141_90167          | full   | 1275   | No  | NA | 0     | 0  | Low-quality    | Genome-fragment | 1.43            | 0     |       |
| S13_vx_40645              | full   | 3012   | No  | NA | 0     | 2  | Not-determined | Genome-fragment | NA              | 0     |       |
| S5_vx_k141_30851          | full   | 1275   | No  | NA | 0     | 0  | Low-quality    | Genome-fragment | 3.51            | 0     |       |
| S5_vx_k141_36935          | full   | 1275   | No  | NA | 0     | 0  | Low-quality    | Genome-fragment | 2.19            | 0     |       |
| S10_extracted_8195        |        | 1275   | No  | NA | 0     | 0  | Low-quality    | Genome-fragment | 3.09            | 0     |       |
| S12_extracted_k141_10514  |        | 1275   | No  | NA | 0     | 0  | Low-quality    | Genome-fragment | 2.71            | 0     |       |
| S15_vx_10021              | full   | 1275   | No  | NA | 0     | 0  | Low-quality    | Genome-fragment | 3.14            | 0     |       |
| S13_vx_41418              | full   | 1717   | No  | NA | 0     | 2  | Not-determined | Genome-fragment | NA              | 0     |       |
| S13_vx_42028              | full   | 1761   | No  | NA | 0     | 2  | Not-determined | Genome-fragment | NA              | 0     |       |
| S13_vx_42163              | full   | 1523   | No  | NA | 0     | 0  | Not-determined | Genome-fragment | NA              | 0     |       |
| S6_vx_k141_48769          | full   | 1275   | No  | NA | 0     | 0  | Low-quality    | Genome-fragment | 0.81            | 0     |       |
| S8_extracted_k141_111337  |        | 1275   | No  | NA | 2     | 0  | Low-quality    | Genome-fragment | 3.13            | 0     |       |
| S13_vx_42345              | full   | 2140   | No  | NA | 0     | 0  | Not-determined | Genome-fragment | NA              | 0     |       |
| S8_vx_k141_12595          | full   | 1275   | No  | NA | 0     | 4  | Low-quality    | Genome-fragment | 0.4             | 0     |       |
| S13_vx_42582              | full   | 1524   | No  | NA | 0     | 2  | Not-determined | Genome-fragment | NA              | 0     |       |
| S13_vx_43414              | full   | 1721   | No  | NA | 0     | 2  | Not-determined | Genome-fragment | NA              | 0     |       |
| S13_vx_43648              | full   | 1269   | No  | NA | 0     | 1  | Not-determined | Genome-fragment | NA              | 0     |       |
| S13_vx_43828              | full   | 1312   | No  | NA | 0     | 1  | Not-determined | Genome-fragment | NA              | 0     |       |
| S17_extracted_k141_116055 |        | 1276   | No  | NA | 0     | 0  | Low-quality    | Genome-fragment | 1.72            | 0     |       |
| S12_vx_43920              | full   | 2413   | No  | NA | 0     | 2  | Not-determined | Genome-fragment | NA              | 0     |       |
| S17_vx_k141_131420        | t2gene | 1276   | No  | NA | 1     | 0  | Low-quality    | Genome-fragment | 2.59            | 0     |       |
| S11_vx_k141_84220         | t2gene | 1276   | No  | NA | 1     | 0  | Low-quality    | Genome-fragment | 3.25            | 0     |       |
| S14_vx_k141_59883         | full   | 1276   | No  | NA | 0     | 0  | Low-quality    | Genome-fragment | 2.36            | 0     |       |
| S13_vx_44629              | full   | 2155   | No  | NA | 0     | 2  | Not-determined | Genome-fragment | NA              | 0     |       |
| S1_vx_k141_68252          | full   | 1276   | No  | NA | 0     | 0  | Low-quality    | Genome-fragment | 0.73            | 0     |       |
| S13_vx_44939              | full   | 1392   | No  | NA | 0     | 0  | Not-determined | Genome-fragment | NA              | 0     |       |
| S5_extracted_k141_82592   |        | 1276   | No  | NA | 2     | 0  | Low-quality    | Genome-fragment | 1.83            | 0     |       |
| S13_vx_45268              | full   | 2449   | No  | NA | 0     | 0  | Not-determined | Genome-fragment | NA              | 0     |       |
| S13_vx_45282              | full   | 2098   | No  | NA | 0     | 1  | Not-determined | Genome-fragment | NA              | 0     |       |
| S13_vx_45320              | full   | 1116   | No  | NA | 0     | 0  | Not-determined | Genome-fragment | NA              | 0     |       |
| S13_vx_45335</            |        |        |     |    |       |    |                |                 |                 |       |       |



|                           |      |        |     |    |     |    |                |                 |       |       |
|---------------------------|------|--------|-----|----|-----|----|----------------|-----------------|-------|-------|
| S10_v3_340601             | full | 1277   | No  | NA | 0   | 0  | Low-quality    | Genome-fragment | 10.64 | 0     |
| S12_v3_k141_6401          | full | 1277   | No  | NA | 0   | 0  | Low-quality    | Genome-fragment | 3.17  | 0     |
| S4_extracted_757          |      | 1277   | No  | NA | 4   | 0  | Low-quality    | Genome-fragment | 4.23  | 0     |
| S6_v3_k141_6942           | full | 1277   | No  | NA | 1   | 0  | Low-quality    | Genome-fragment | 2.86  | 0     |
| S13_v3_51939              | full | 2594   | No  | NA | 0   | 3  | Not-determined | Genome-fragment | NA    | 0     |
| S8_v3_k141_86756          | full | 1277   | No  | NA | 0   | 0  | Low-quality    | Genome-fragment | 1.61  | 0     |
| S9_v3_k141_68651          | full | 1278   | No  | NA | 0   | 0  | Low-quality    | Genome-fragment | 1.71  | 0     |
| S11_extracted_k141_95412  |      | 1278   | No  | NA | 0   | 0  | Low-quality    | Genome-fragment | 2.02  | 0     |
| S11_v3_k141_30184         | full | 1278   | No  | NA | 0   | 1  | Low-quality    | Genome-fragment | 2.19  | 0     |
| S14_v3_k141_4504          | full | 1278   | No  | NA | 0   | 1  | Low-quality    | Genome-fragment | 2.17  | 0     |
| S3_extracted_k141_111379  |      | 1278   | No  | NA | 0   | 0  | Low-quality    | Genome-fragment | 0.9   | 0     |
| S13_v3_52653              | full | 1933   | No  | NA | 0   | 0  | Not-determined | Genome-fragment | NA    | 0     |
| S13_v3_52666              | full | 3156   | No  | NA | 0   | 1  | Not-determined | Genome-fragment | NA    | 0     |
| S13_v3_52912              | full | 6979   | No  | NA | 0   | 5  | Not-determined | Genome-fragment | NA    | 0     |
| S13_v3_52929              | full | 1822   | No  | NA | 0   | 2  | Not-determined | Genome-fragment | NA    | 0     |
| S5_v3_k141_64350          | full | 1278   | No  | NA | 0   | 0  | Low-quality    | Genome-fragment | 2.85  | 0     |
| S10_extracted_86478       |      | 1278   | No  | NA | 0   | 2  | Low-quality    | Genome-fragment | 0.59  | 0     |
| S13_v3_53676              | full | 2043   | No  | NA | 0   | 0  | Not-determined | Genome-fragment | NA    | 0     |
| S10_v3_28500              | full | 1278   | No  | NA | 0   | 2  | Low-quality    | Genome-fragment | 2.18  | 0     |
| S13_v3_53857              | full | 1058   | No  | NA | 0   | 1  | Not-determined | Genome-fragment | NA    | 0     |
| S13_v3_54076              | full | 6304   | No  | NA | 0   | 0  | Not-determined | Genome-fragment | NA    | 0     |
| S13_v3_54183              | full | 2025   | No  | NA | 0   | 0  | Not-determined | Genome-fragment | NA    | 0     |
| S12_extracted_k141_126683 |      | 1278   | No  | NA | 1   | 0  | Low-quality    | Genome-fragment | 2.9   | 0     |
| S13_v3_54602              | full | 1656   | No  | NA | 0   | 0  | Not-determined | Genome-fragment | NA    | 0     |
| S13_v3_54826              | full | 1288   | No  | NA | 0   | 1  | Not-determined | Genome-fragment | NA    | 0     |
| S13_v3_54820              | full | 1507   | No  | NA | 0   | 3  | Not-determined | Genome-fragment | NA    | 0     |
| S13_v3_55038              | full | 1012   | No  | NA | 0   | 0  | Not-determined | Genome-fragment | NA    | 0     |
| S12_v3_k141_119160        | full | 1278   | No  | NA | 1   | 0  | Low-quality    | Genome-fragment | 1.3   | 0     |
| S13_v3_55659              | full | 1059   | No  | NA | 0   | 0  | Not-determined | Genome-fragment | NA    | 0     |
| S13_v3_55660              | full | 2230   | No  | NA | 0   | 0  | Not-determined | Genome-fragment | NA    | 0     |
| S6_v3_k141_48708          | full | 1278   | No  | NA | 2   | 0  | Low-quality    | Genome-fragment | 2.14  | 0     |
| S13_v3_27729              | full | 1279   | No  | NA | 0   | 0  | Low-quality    | Genome-fragment | 9.37  | 0     |
| S14_extracted_k141_23002  |      | 1279   | No  | NA | 1   | 0  | Low-quality    | Genome-fragment | 0.49  | 0     |
| S13_v3_55906              | full | 1038   | No  | NA | 0   | 1  | Not-determined | Genome-fragment | NA    | 0     |
| S13_v3_k141_103529        | full | 1279   | No  | NA | 0   | 0  | Low-quality    | Genome-fragment | 2.64  | 0     |
| S13_v3_55997              | full | 7716   | No  | NA | 0   | 1  | Not-determined | Genome-fragment | NA    | 0     |
| S10_extracted_93894       |      | 1279   | No  | NA | 0   | 0  | Low-quality    | Genome-fragment | 3.01  | 0     |
| S13_v3_56260              | full | 3422   | No  | NA | 0   | 2  | Not-determined | Genome-fragment | NA    | 0     |
| S13_v3_56327              | full | 1089   | No  | NA | 0   | 1  | Not-determined | Genome-fragment | NA    | 0     |
| S10_v3_41166              | full | 1279   | No  | NA | 0   | 0  | Low-quality    | Genome-fragment | 0.56  | 0     |
| S12_v3_k141_123229        | full | 1279   | No  | NA | 0   | 0  | Low-quality    | Genome-fragment | 2.42  | 0     |
| S13_v3_56608              | full | 1028   | No  | NA | 0   | 0  | Not-determined | Genome-fragment | NA    | 0     |
| S8_v3_k141_73029          | full | 1279   | No  | NA | 0   | 0  | Low-quality    | Genome-fragment | 2.83  | 0     |
| S8_v3_k141_91532          | full | 1279   | No  | NA | 0   | 0  | Low-quality    | Genome-fragment | 2.71  | 0     |
| S9_v3_k141_19541          | full | 1280   | No  | NA | 0   | 0  | Low-quality    | Genome-fragment | NA    | 0     |
| S9_v3_k141_82472          | full | 1280   | No  | NA | 0   | 0  | Low-quality    | Genome-fragment | 3.15  | 0     |
| S13_v3_57079              | full | 2091   | No  | NA | 0   | 2  | Not-determined | Genome-fragment | NA    | 0     |
| S13_v3_57133              | full | 5135   | No  | NA | 0   | 3  | Not-determined | Genome-fragment | NA    | 0     |
| S13_v3_57144              | full | 2467   | No  | NA | 0   | 2  | Not-determined | Genome-fragment | NA    | 0     |
| S14_v3_k141_94380         | full | 1280   | No  | NA | 4   | 0  | Low-quality    | Genome-fragment | 2.64  | 0     |
| S13_v3_57251              | full | 1178   | No  | NA | 0   | 0  | Not-determined | Genome-fragment | NA    | 0     |
| S13_v3_57267              | full | 289184 | No  | NA | 24  | 9  | Not-determined | Genome-fragment | 72.12 | 0     |
| S13_v3_57417              | full | 1880   | No  | NA | 0   | 0  | Not-determined | Genome-fragment | NA    | 0     |
| S14_v3_k141_13370         | full | 1280   | No  | NA | 0   | 1  | Low-quality    | Genome-fragment | 2.91  | 0     |
| S12_v3_57889              | full | 1107   | No  | NA | 0   | 0  | Not-determined | Genome-fragment | NA    | 0     |
| S13_v3_58129              | full | 1686   | No  | NA | 0   | 0  | Not-determined | Genome-fragment | NA    | 0     |
| S13_v3_58230              | full | 3969   | No  | NA | 0   | 1  | Not-determined | Genome-fragment | NA    | 0     |
| S13_v3_58609              | full | 1051   | No  | NA | 0   | 0  | Not-determined | Genome-fragment | NA    | 0     |
| S13_v3_58699              | full | 2595   | No  | NA | 0   | 1  | Not-determined | Genome-fragment | NA    | 0     |
| S13_v3_58864              | full | 1296   | No  | NA | 0   | 1  | Not-determined | Genome-fragment | NA    | 0     |
| S1_v3_k141_29277          | full | 1280   | No  | NA | 0   | 0  | Low-quality    | Genome-fragment | 1.42  | 0     |
| S13_v3_59049              | full | 30659  | No  | NA | 0   | 7  | Not-determined | Genome-fragment | NA    | 0     |
| S1_v3_k141_25391          | full | 1280   | No  | NA | 0   | 0  | Low-quality    | Genome-fragment | 2.89  | 0     |
| S13_v3_59103              | full | 1615   | No  | NA | 0   | 1  | Not-determined | Genome-fragment | NA    | 0     |
| S13_v3_59223              | full | 3306   | No  | NA | 0   | 2  | Not-determined | Genome-fragment | NA    | 0     |
| S3_extracted_k141_68139   |      | 1280   | No  | NA | 0   | 0  | Low-quality    | Genome-fragment | 3.07  | 0     |
| S13_v3_59490              | full | 8533   | No  | NA | 0   | 0  | Not-determined | Genome-fragment | NA    | 0     |
| S13_v3_59547              | full | 1549   | No  | NA | 0   | 1  | Not-determined | Genome-fragment | NA    | 0     |
| S13_v3_59661              | full | 2007   | No  | NA | 0   | 1  | Not-determined | Genome-fragment | NA    | 0     |
| S13_v3_59975              | full | 1570   | No  | NA | 0   | 0  | Not-determined | Genome-fragment | NA    | 0     |
| S13_v3_60281              | full | 1249   | No  | NA | 0   | 2  | Not-determined | Genome-fragment | NA    | 0     |
| S13_v3_60368              | full | 2153   | No  | NA | 0   | 2  | Not-determined | Genome-fragment | NA    | 0     |
| S13_v3_60467              | full | 1121   | No  | NA | 0   | 1  | Not-determined | Genome-fragment | NA    | 0     |
| S13_v3_60534              | full | 4786   | No  | NA | 0   | 0  | Not-determined | Genome-fragment | NA    | 0     |
| S13_v3_60535              | full | 1589   | No  | NA | 0   | 0  | Not-determined | Genome-fragment | NA    | 0     |
| S3_v3_k141_4460           | full | 1280   | No  | NA | 0   | 0  | Low-quality    | Genome-fragment | 3.45  | 0     |
| S5_v3_k141_68558          | full | 1280   | No  | NA | 0   | 0  | Low-quality    | Genome-fragment | 1.97  | 0     |
| S13_v3_60997              | full | 1281   | No  | NA | 0   | 1  | Not-determined | Genome-fragment | NA    | 0     |
| S7_extracted_14075        |      | 1280   | No  | NA | 0   | 0  | Low-quality    | Genome-fragment | 3.03  | 0     |
| S7_v3_23211               | full | 1280   | No  | NA | 0   | 0  | Low-quality    | Genome-fragment | 0.89  | 0     |
| S13_v3_61225              | full | 3354   | No  | NA | 0   | 3  | Not-determined | Genome-fragment | NA    | 0     |
| S13_v3_61262              | full | 5859   | No  | NA | 0   | 2  | Not-determined | Genome-fragment | NA    | 0     |
| S7_v3_134278              | full | 1280   | No  | NA | 1   | 0  | Low-quality    | Genome-fragment | 2.09  | 0     |
| S16_v3_52661              | full | 1280   | No  | NA | 0   | 0  | Low-quality    | Genome-fragment | 0.71  | 0     |
| S13_v3_61677              | full | 2595   | No  | NA | 0   | 1  | Not-determined | Genome-fragment | NA    | 0     |
| S16_v3_53255              | full | 1280   | No  | NA | 0   | 0  | Low-quality    | Genome-fragment | 2.35  | 0     |
| S13_v3_62031              | full | 1518   | No  | NA | 0   | 1  | Not-determined | Genome-fragment | NA    | 0     |
| S12_extracted_k141_6775   |      | 1280   | No  | NA | 0   | 0  | Low-quality    | Genome-fragment | 1.31  | 0     |
| S13_v3_62141              | full | 32085  | No  | NA | 0   | 8  | Not-determined | Genome-fragment | NA    | 0     |
| S13_v3_62243              | full | 1976   | No  | NA | 0   | 0  | Not-determined | Genome-fragment | NA    | 0     |
| S13_v3_62489              | full | 1832   | No  | NA | 0   | 0  | Not-determined | Genome-fragment | NA    | 0     |
| S13_v3_62728              | full | 2157   | No  | NA | 0   | 1  | Not-determined | Genome-fragment | NA    | 0     |
| S12_extracted_k141_21779  |      | 1280   | No  | NA | 0   | 1  | Low-quality    | Genome-fragment | 0.84  | 0     |
| S12_v3_k141_142876        | full | 1280   | No  | NA | 1   | 0  | Low-quality    | Genome-fragment | 3.06  | 0     |
| S13_v3_63080              | full | 2295   | No  | NA | 0   | 2  | Not-determined | Genome-fragment | NA    | 0     |
| S6_v3_k141_24207          | full | 1280   | No  | NA | 0   | 1  | Low-quality    | Genome-fragment | 2.08  | 0     |
| S13_v3_63425              | full | 2104   | No  | NA | 0   | 0  | Not-determined | Genome-fragment | NA    | 0     |
| S13_v3_63455              | full | 4154   | No  | NA | 0   | 2  | Not-determined | Genome-fragment | NA    | 0     |
| S13_v3_63794              | full | 2820   | No  | NA | 0   | 4  | Not-determined | Genome-fragment | NA    | 0     |
| S13_v3_63833              | full | 1280   | No  | NA | 0   | 1  | Not-determined | Genome-fragment | NA    | 0     |
| S8_v3_k141_11646          | full | 1280   | No  | NA | 2   | 0  | Low-quality    | Genome-fragment | 3.16  | 0     |
| S13_v3_63949              | full | 1893   | No  | NA | 0   | 1  | Not-determined | Genome-fragment | NA    | 0     |
| S13_v3_64129              | full | 1127   | No  | NA | 0   | 0  | Not-determined | Genome-fragment | NA    | 0     |
| S17_v3_k141_162569        | full | 1281   | No  | NA | 0   | 0  | Low-quality    | Genome-fragment | 3.07  | 0     |
| S13_v3_64380              | full | 1357   | No  | NA | 0   | 0  | Not-determined | Genome-fragment | NA    | 0     |
| S13_v3_64381              | full | 1173   | No  | NA | 0   | 1  | Not-determined | Genome-fragment | NA    | 0     |
| S13_v3_64514              | full | 1255   | No  | NA | 0   | 1  | Not-determined | Genome-fragment | NA    | 0     |
| S13_v3_64701              | full | 1746   | No  | NA | 0   | 0  | Not-determined | Genome-fragment | NA    | 0     |
| S13_v3_64745              | full | 11958  | No  | NA | 0   | 6  | Not-determined | Genome-fragment | NA    | 0     |
| S17_v3_k141_153266        | full | 1281   | No  | NA | 1   | 0  | Low-quality    | Genome-fragment | 3.05  | 0     |
| S13_extracted_86306       |      | 1281   | No  | NA | 2   | 0  | Low-quality    | Genome-fragment | 3.36  | 0     |
| S13_v3_65215              | full | 3536   | No  | NA | 0   | 1  | Not-determined | Genome-fragment | NA    | 0     |
| S14_extracted_k141_15501  |      | 1281   | No  | NA | 2   | 0  | Low-quality    | Genome-fragment | 4.23  | 0     |
| S14_extracted_k141_82287  |      | 1281   | No  | NA | 1   | 0  | Low-quality    | Genome-fragment | 4.22  | 0     |
| S13_v3_65782              | full | 1128   | No  | NA | 0   | 1  | Not-determined | Genome-fragment | NA    | 0     |
| S13_v3_65800              | full | 3219   | No  | NA | 0   | 0  | Not-determined | Genome-fragment | NA    | 0     |
| S13_v3_65904              | full | 5998   | No  | NA | 0   | 0  | Not-determined | Genome-fragment | NA    | 0     |
| S1_v3_k141_155635         | full | 1281   | No  | NA | 0   | 1  | Low-quality    | Genome-fragment | 0.75  | 0     |
| S3_extracted_k141_94221   |      | 1281   | No  | NA | 0   | 0  | Low-quality    | Genome-fragment | 1.23  | 0     |
| S5_extracted_k141_59290   |      | 1281   | No  | NA | 0   | 0  | Low-quality    | Genome-fragment | 5.85  | 0     |
| S13_v3_66485              | full | 1368   | No  | NA | 0   | 1  | Not-determined | Genome-fragment | NA    | 0     |
| S5_v3_k141_38715          | full | 1281   | No  | NA | 0   | 0  | Low-quality    | Genome-fragment | 3.39  | 0     |
| S7_extracted_42135        |      | 1281   | No  | NA | 0   | 0  | Low-quality    | Genome-fragment | 2.83  | 0     |
| S7_extracted_129772       |      | 1281   | No  | NA | 1   | 0  | Low-quality    | Genome-fragment | 0.93  | 0     |
| S13_v3_67021              | full | 1663   | No  | NA | 0   | 0  | Not-determined | Genome-fragment | NA    | 0     |
| S7_v3_79045               | full | 1281   | No  | NA | 0   | 0  | Low-quality    | Genome-fragment | 1.75  | 0     |
| S13_v3_67277              | full | 1275   | No  | NA | 0   | 0  | Not-determined | Genome-fragment | NA    | 0     |
| S13_v3_67429              | full | 91295  | Yes | NA | 119 | 24 | High-quality   | Genome-fragment | 100   | 54.55 |
| S13_v3_67502              | full | 6834   | No  | NA | 0   | 5  | Not-determined | Genome-fragment | NA    | 0     |
| S13_v3_67604              | full | 1527   | No  | NA | 0   | 2  | Not-determined | Genome-fragment | NA    | 0     |
| S16_v3_67078              | full | 1281   | No  | NA | 1   | 0  | Low-quality    | Genome-fragment | 2.73  | 0     |
| S13_v3_67787              | full | 1424   | No  | NA | 0   | 1  | Not-determined | Genome-fragment | NA    | 0     |
| S13_v3_67875              | full | 1039   | No  | NA | 0   | 0  | Not-determined | Genome-fragment | NA    | 0     |
| S13_v3_68102              | full | 15847  | No  | NA | 8   | 0  | Medium-quality | Genome-fragment | 73.21 | 0     |
| S13_v3_68142              | full | 2602   | No  | NA | 0   | 2  | Not-determined | Genome-fragment | NA    | 0     |
| S13_v3_68179              | full | 1865   | No  | NA | 0   | 3  | Not-determined | Genome-fragment | NA    | 0     |
| S16_v3_77311              | full | 1281   | Yes | NA | 670 | 1  | Low-quality    | Genome-fragment | 1.11  | 47.7  |
| S12_v3_k141_64935         | full | 1281   | No  | NA | 0   | 0  | Low-quality    | Genome-fragment | 2.47  | 0     |
| S13_v3_68402              | full | 1821   | No  | NA | 0   | 3  | Not-determined | Genome-fragment | NA    | 0     |
| S13_v3_68615              | full |        |     |    |     |    |                |                 |       |       |



|                           |           |       |    |    |    |    |                |                 |     |      |
|---------------------------|-----------|-------|----|----|----|----|----------------|-----------------|-----|------|
| S13_v0_72654              | [full]    | 2035  | No | NA | 0  | 2  | Not-determined | Genome-fragment | NA  | 0    |
| S13_v0_72668              | [full]    | 1994  | No | NA | 0  | 1  | Not-determined | Genome-fragment | NA  | 0    |
| S13_v0_72848              | [full]    | 1109  | No | NA | 0  | 1  | Not-determined | Genome-fragment | NA  | 0    |
| S13_v0_72996              | [full]    | 1123  | No | NA | 0  | 0  | Not-determined | Genome-fragment | NA  | 0    |
| S13_v0_73159              | [full]    | 3773  | No | NA | 0  | 2  | Not-determined | Genome-fragment | NA  | 0    |
| S4_extracted_14061        |           | 1282  | No | NA | 1  | 0  | Low-quality    | Genome-fragment | NA  | 4.23 |
| S13_v0_73333              | [full]    | 1654  | No | NA | 0  | 0  | Not-determined | Genome-fragment | NA  | 0    |
| S8_v0_k141_10989          | [full]    | 1282  | No | NA | 2  | 0  | Low-quality    | Genome-fragment | NA  | 2.86 |
| S13_v0_73413              | [full]    | 12113 | No | NA | 0  | 6  | Not-determined | Genome-fragment | NA  | 0    |
| S13_v0_73517              | [full]    | 1238  | No | NA | 0  | 0  | Not-determined | Genome-fragment | NA  | 0    |
| S13_v0_73658              | [full]    | 2266  | No | NA | 0  | 2  | Not-determined | Genome-fragment | NA  | 0    |
| S13_v0_73837              | [full]    | 1701  | No | NA | 0  | 0  | Not-determined | Genome-fragment | NA  | 0    |
| S13_v0_73855              | [full]    | 1794  | No | NA | 0  | 0  | Not-determined | Genome-fragment | NA  | 0    |
| S13_v0_73864              | [full]    | 2323  | No | NA | 0  | 3  | Not-determined | Genome-fragment | NA  | 0    |
| S13_v0_73911              | [full]    | 1870  | No | NA | 0  | 2  | Not-determined | Genome-fragment | NA  | 0    |
| S17_v0_k141_25044         | [full]    | 1283  | No | NA | 0  | 0  | Low-quality    | Genome-fragment | NA  | 1.86 |
| S13_v0_74518              | [full]    | 1246  | No | NA | 0  | 3  | Not-determined | Genome-fragment | NA  | 0    |
| S13_v0_74542              | [full]    | 1222  | No | NA | 0  | 0  | Not-determined | Genome-fragment | NA  | 0    |
| S12_v0_74580              | [full]    | 1755  | No | NA | 0  | 0  | Not-determined | Genome-fragment | NA  | 0    |
| S9_v0_k141_72767          | [full]    | 1283  | No | NA | 0  | 0  | Low-quality    | Genome-fragment | NA  | 2.63 |
| S13_v0_74849              | [full]    | 1180  | No | NA | 0  | 1  | Not-determined | Genome-fragment | NA  | 0    |
| S11_extracted_k141_37737  |           | 1283  | No | NA | 1  | 0  | Low-quality    | Genome-fragment | NA  | 3.2  |
| S13_v0_74971              | [full]    | 1256  | No | NA | 0  | 1  | Not-determined | Genome-fragment | NA  | 0    |
| S13_v0_75012              | [full]    | 1617  | No | NA | 0  | 0  | Not-determined | Genome-fragment | NA  | 0    |
| S14_v0_k141_10958         | [full]    | 1283  | No | NA | 0  | 0  | Low-quality    | Genome-fragment | NA  | 2.11 |
| S13_v0_75365              | [full]    | 1514  | No | NA | 0  | 1  | Not-determined | Genome-fragment | NA  | 0    |
| S7_v0_79482               | [full]    | 1283  | No | NA | 1  | 0  | Low-quality    | Genome-fragment | NA  | 3.49 |
| S13_v0_75681              | [full]    | 2457  | No | NA | 0  | 0  | Not-determined | Genome-fragment | NA  | 0    |
| S13_v0_75695              | [full]    | 2239  | No | NA | 0  | 3  | Not-determined | Genome-fragment | NA  | 0    |
| S16_extracted_50777       |           | 1283  | No | NA | 0  | 1  | Low-quality    | Genome-fragment | NA  | 1.56 |
| S13_v0_75867              | [full]    | 2155  | No | NA | 0  | 1  | Not-determined | Genome-fragment | NA  | 0    |
| S13_v0_76004              | [full]    | 1613  | No | NA | 0  | 0  | Not-determined | Genome-fragment | NA  | 0    |
| S13_v0_76115              | [full]    | 2506  | No | NA | 0  | 0  | Not-determined | Genome-fragment | NA  | 0    |
| S6_v0_k141_42820          | [full]    | 1283  | No | NA | 1  | 0  | Low-quality    | Genome-fragment | NA  | 3.21 |
| S13_v0_76191              | [full]    | 3550  | No | NA | 0  | 1  | Not-determined | Genome-fragment | NA  | 0    |
| S8_extracted_k141_51330   |           | 1283  | No | NA | 0  | 0  | Low-quality    | Genome-fragment | NA  | 2.83 |
| S17_v0_k141_71998         | [full]    | 1284  | No | NA | 0  | 2  | Low-quality    | Genome-fragment | NA  | 0.45 |
| S13_v0_76571              | [full]    | 1219  | No | NA | 0  | 1  | Not-determined | Genome-fragment | NA  | 0    |
| S9_v0_k141_84577          | [full]    | 1284  | No | NA | 0  | 0  | Low-quality    | Genome-fragment | NA  | 3.28 |
| S13_v0_76934              | [full]    | 1842  | No | NA | 0  | 3  | Not-determined | Genome-fragment | NA  | 0    |
| S13_v0_76950              | [full]    | 2058  | No | NA | 0  | 3  | Not-determined | Genome-fragment | NA  | 0    |
| S11_k141_102027           | [full]    | 1284  | No | NA | 0  | 0  | Low-quality    | Genome-fragment | NA  | 3.37 |
| S13_v0_76980              | [full]    | 3115  | No | NA | 0  | 3  | Not-determined | Genome-fragment | NA  | 0    |
| S13_v0_77128              | [full]    | 1561  | No | NA | 0  | 0  | Not-determined | Genome-fragment | NA  | 0    |
| S14_extracted_k141_103871 |           | 1284  | No | NA | 0  | 0  | Low-quality    | Genome-fragment | NA  | 1.54 |
| S14_extracted_k141_12055  |           | 1284  | No | NA | 0  | 0  | Low-quality    | Genome-fragment | NA  | 1.88 |
| S13_v0_77370              | [full]    | 1424  | No | NA | 0  | 2  | Not-determined | Genome-fragment | NA  | 0    |
| S13_v0_77981              | [full]    | 20756 | No | NA | 0  | 13 | Not-determined | Genome-fragment | NA  | 0    |
| S13_v0_78017              | [full]    | 2517  | No | NA | 0  | 0  | Not-determined | Genome-fragment | NA  | 0    |
| S13_v0_78620              | [full]    | 1780  | No | NA | 0  | 2  | Not-determined | Genome-fragment | NA  | 0    |
| S13_v0_78659              | [full]    | 1301  | No | NA | 0  | 3  | Not-determined | Genome-fragment | NA  | 0    |
| S12_v0_78895              | [full]    | 1172  | No | NA | 0  | 0  | Not-determined | Genome-fragment | NA  | 0    |
| S13_v0_79793              | [full]    | 1219  | No | NA | 0  | 2  | Not-determined | Genome-fragment | NA  | 0    |
| S14_extracted_k141_11983  |           | 1284  | No | NA | 0  | 0  | Low-quality    | Genome-fragment | NA  | 1.29 |
| S12_v0_79966              | [full]    | 5152  | No | NA | 0  | 1  | Not-determined | Genome-fragment | NA  | 0    |
| S13_v0_80078              | [full]    | 1659  | No | NA | 0  | 0  | Not-determined | Genome-fragment | NA  | 0    |
| S13_v0_80446              | [full]    | 1971  | No | NA | 0  | 0  | Not-determined | Genome-fragment | NA  | 0    |
| S13_v0_80456              | [full]    | 1646  | No | NA | 0  | 0  | Not-determined | Genome-fragment | NA  | 0    |
| S13_v0_80570              | [full]    | 2050  | No | NA | 0  | 2  | Not-determined | Genome-fragment | NA  | 0    |
| S13_v0_80579              | [full]    | 3982  | No | NA | 0  | 3  | Not-determined | Genome-fragment | NA  | 0    |
| S13_v0_80645              | [full]    | 2428  | No | NA | 0  | 0  | Not-determined | Genome-fragment | NA  | 0    |
| S14_extracted_k141_56808  |           | 1284  | No | NA | 0  | 0  | Low-quality    | Genome-fragment | NA  | 2.87 |
| S13_v0_80839              | [full]    | 1368  | No | NA | 0  | 0  | Not-determined | Genome-fragment | NA  | 0    |
| S14_v0_k141_107498        | [full]    | 1284  | No | NA | 0  | 2  | Low-quality    | Genome-fragment | NA  | 1.59 |
| S13_v0_81140              | [full]    | 10596 | No | NA | 1  | 1  | Not-determined | Genome-fragment | NA  | 0    |
| S13_v0_81222              | [full]    | 3992  | No | NA | 0  | 0  | Not-determined | Genome-fragment | NA  | 0    |
| S11_extracted_k141_56901  |           | 1284  | No | NA | 2  | 0  | Low-quality    | Genome-fragment | NA  | 2.88 |
| S13_v0_81364              | [full]    | 2111  | No | NA | 0  | 1  | Not-determined | Genome-fragment | NA  | 0    |
| S13_v0_81494              | [full]    | 2502  | No | NA | 0  | 1  | Not-determined | Genome-fragment | NA  | 0    |
| S7_v0_95122               | [full]    | 1284  | No | NA | 0  | 0  | Low-quality    | Genome-fragment | NA  | 2.86 |
| S13_v0_81789              | [full]    | 2508  | No | NA | 0  | 1  | Not-determined | Genome-fragment | NA  | 2.14 |
| S16_extracted_14634       |           | 1284  | No | NA | 0  | 0  | Low-quality    | Genome-fragment | NA  | 0    |
| S13_v0_82039              | [full]    | 2238  | No | NA | 0  | 0  | Not-determined | Genome-fragment | NA  | 0    |
| S13_v0_82277              | [full]    | 1259  | No | NA | 0  | 2  | Not-determined | Genome-fragment | NA  | 0    |
| S13_v0_82498              | [full]    | 4264  | No | NA | 0  | 2  | Not-determined | Genome-fragment | NA  | 0    |
| S13_v0_82520              | [full]    | 2505  | No | NA | 0  | 1  | Not-determined | Genome-fragment | NA  | 0    |
| S13_v0_83104              | [full]    | 1136  | No | NA | 0  | 1  | Not-determined | Genome-fragment | NA  | 0    |
| S13_v0_83228              | [full]    | 2576  | No | NA | 0  | 2  | Not-determined | Genome-fragment | NA  | 0    |
| S10_v0_20401              | [full]    | 1284  | No | NA | 0  | 1  | Low-quality    | Genome-fragment | NA  | 2.84 |
| S13_v0_83326              | [full]    | 2083  | No | NA | 0  | 1  | Not-determined | Genome-fragment | NA  | 0    |
| S10_v0_27043              | [full]    | 1284  | No | NA | 1  | 0  | Low-quality    | Genome-fragment | NA  | 1.9  |
| S13_v0_83404              | [full]    | 1719  | No | NA | 0  | 0  | Not-determined | Genome-fragment | NA  | 0    |
| S13_v0_83447              | [full]    | 56650 | No | NA | 16 | 4  | High-quality   | High-quality    | 100 | 0    |
| S12_v0_k141_187991        | [full]    | 1284  | No | NA | 1  | 0  | Low-quality    | Genome-fragment | NA  | 3    |
| S12_v0_83622              | [full]    | 1779  | No | NA | 0  | 0  | Not-determined | Genome-fragment | NA  | 0    |
| S13_v0_83809              | [full]    | 1711  | No | NA | 0  | 0  | Not-determined | Genome-fragment | NA  | 0    |
| S13_v0_84187              | [full]    | 1969  | No | NA | 0  | 0  | Not-determined | Genome-fragment | NA  | 0    |
| S12_v0_84458              | [full]    | 1386  | No | NA | 0  | 0  | Not-determined | Genome-fragment | NA  | 0    |
| S13_v0_84539              | [full]    | 2149  | No | NA | 0  | 3  | Not-determined | Genome-fragment | NA  | 0    |
| S4_extracted_6170         |           | 1284  | No | NA | 0  | 1  | Low-quality    | Genome-fragment | NA  | 1.62 |
| S8_extracted_k141_54823   |           | 1284  | No | NA | 0  | 1  | Low-quality    | Genome-fragment | NA  | 0.96 |
| S8_extracted_k141_49838   |           | 1284  | No | NA | 0  | 0  | Low-quality    | Genome-fragment | NA  | 1.19 |
| S13_v0_85204              | [full]    | 1840  | No | NA | 0  | 0  | Not-determined | Genome-fragment | NA  | 0    |
| S13_v0_85252              | [full]    | 1262  | No | NA | 0  | 0  | Not-determined | Genome-fragment | NA  | 0    |
| S13_v0_85254              | [full]    | 2127  | No | NA | 0  | 2  | Not-determined | Genome-fragment | NA  | 0    |
| S8_v0_k141_10554          | [full]    | 1284  | No | NA | 0  | 0  | Low-quality    | Genome-fragment | NA  | 3.08 |
| S17_v0_k141_11988         | [full]    | 1285  | No | NA | 1  | 0  | Low-quality    | Genome-fragment | NA  | 2.2  |
| S13_v0_85553              | [full]    | 19277 | No | NA | 0  | 11 | Not-determined | Genome-fragment | NA  | 0    |
| S13_v0_85647              | [full]    | 1206  | No | NA | 0  | 0  | Not-determined | Genome-fragment | NA  | 0    |
| S9_v0_k141_75327          | [In2gene] | 1285  | No | NA | 1  | 0  | Low-quality    | Genome-fragment | NA  | 2.86 |
| S13_v0_85853              | [full]    | 1588  | No | NA | 0  | 2  | Not-determined | Genome-fragment | NA  | 0    |
| S13_v0_85891              | [full]    | 2211  | No | NA | 0  | 0  | Not-determined | Genome-fragment | NA  | 0    |
| S11_extracted_k141_12025  |           | 1285  | No | NA | 2  | 0  | Low-quality    | Genome-fragment | NA  | 3.17 |
| S13_v0_86100              | [full]    | 1320  | No | NA | 0  | 0  | Not-determined | Genome-fragment | NA  | 0    |
| S11_k141_88275            | [full]    | 1285  | No | NA | 0  | 0  | Low-quality    | Genome-fragment | NA  | 2.21 |
| S13_v0_86212              | [full]    | 1859  | No | NA | 0  | 0  | Not-determined | Genome-fragment | NA  | 0    |
| S13_v0_86222              | [full]    | 1736  | No | NA | 0  | 1  | Not-determined | Genome-fragment | NA  | 0    |
| S13_v0_86251              | [full]    | 1452  | No | NA | 0  | 0  | Not-determined | Genome-fragment | NA  | 0    |
| S11_k141_78894            | [In2gene] | 1285  | No | NA | 1  | 0  | Low-quality    | Genome-fragment | NA  | 1.18 |
| S13_extracted_108812      |           | 1285  | No | NA | 1  | 0  | Low-quality    | Genome-fragment | NA  | 0.82 |
| S13_v0_86796              | [full]    | 2442  | No | NA | 0  | 1  | Not-determined | Genome-fragment | NA  | 0.34 |
| S1_v0_k141_138039         | [full]    | 1285  | No | NA | 0  | 1  | Low-quality    | Genome-fragment | NA  | 0    |
| S13_v0_86872              | [full]    | 1389  | No | NA | 0  | 2  | Not-determined | Genome-fragment | NA  | 0    |
| S13_v0_87084              | [full]    | 1231  | No | NA | 0  | 3  | Not-determined | Genome-fragment | NA  | 0    |
| S12_v0_87108              | [full]    | 20612 | No | NA | 0  | 0  | Medium-quality | Genome-fragment | NA  | 77.8 |
| S13_v0_k141_76574         | [full]    | 1285  | No | NA | 0  | 0  | Low-quality    | Genome-fragment | NA  | 2.46 |
| S13_v0_87197              | [full]    | 2147  | No | NA | 0  | 0  | Not-determined | Genome-fragment | NA  | 0    |
| S1_v0_k141_117145         | [full]    | 1285  | No | NA | 0  | 0  | Low-quality    | Genome-fragment | NA  | 0.87 |
| S13_v0_87204              | [full]    | 5785  | No | NA | 0  | 1  | Not-determined | Genome-fragment | NA  | 0    |
| S5_extracted_k141_122911  |           | 1285  | No | NA | 0  | 1  | Low-quality    | Genome-fragment | NA  | 0.84 |
| S13_v0_87782              | [full]    | 1064  | No | NA | 0  | 1  | Not-determined | Genome-fragment | NA  | 2.25 |
| S5_v0_k141_141507         | [full]    | 1285  | No | NA | 0  | 1  | Low-quality    | Genome-fragment | NA  | 2.38 |
| S16_extracted_27364       |           | 1285  | No | NA | 1  | 0  | Low-quality    | Genome-fragment | NA  | 0    |
| S13_v0_87981              | [full]    | 1128  | No | NA | 0  | 0  | Not-determined | Genome-fragment | NA  | 0    |
| S13_v0_88012              | [full]    | 1286  | No | NA | 0  | 0  | Not-determined | Genome-fragment | NA  | 0    |
| S13_v0_88059              | [full]    | 2900  | No | NA | 0  | 1  | Not-determined | Genome-fragment | NA  | 0    |
| S13_v0_88097              | [full]    | 1737  | No | NA | 0  | 3  | Not-determined | Genome-fragment | NA  | 0    |
| S13_v0_88103              | [full]    | 1253  | No | NA | 0  | 1  | Not-determined | Genome-fragment | NA  | 0    |
| S13_v0_88103              | [full]    | 3441  | No | NA | 0  | 0  | Not-determined | Genome-fragment | NA  | 0    |
| S13_v0_88234              | [full]    | 1011  | No | NA | 0  | 0  | Not-determined | Genome-fragment | NA  | 0    |
| S16_extracted_101202      |           | 1285  | No | NA | 0  | 0  | Low-quality    | Genome-fragment | NA  | 1.14 |
| S10_extracted_37968       |           | 1285  | No | NA | 0  | 0  | Low-quality    | Genome-fragment | NA  | 0.75 |
| S13_v0_88573              | [full]    | 1529  | No | NA | 0  | 2  | Not-determined | Genome-fragment | NA  | 0    |
| S13_v0_88674              | [full]    | 3252  | No | NA | 0  | 1  | Not-determined | Genome-fragment | NA  | 0    |
| S13_v0_89077              | [full]    | 1169  | No | NA | 0  | 1  | Not-determined | Genome-fragment | NA  | 0    |
| S13_v0_88917              | [full]    | 1484  | No | NA | 0  | 0  | Not-determined | Genome-fragment | NA  | 0    |
| S13_v0_89299              | [full]    | 2154  | No | NA | 0  | 1  | Not-determined | Genome-fragment | NA  | 0    |
| S13_v0_89656              | [full]    | 6197  | No | NA | 0  | 3  | Not-determined | Genome-fragment | NA  | 0    |
| S13_v0_89871              | [full]    | 4373  | No | NA | 0  | 2  | Not-determined | Genome-fragment | NA  | 0    |
| S13_v0_90223              | [full]    | 1074  | No | NA | 0  | 1  | Not-determined | Genome-fragment | NA  | 0    |
| S10_v0_118236             |           |       |    |    |    |    |                |                 |     |      |



|                            |       |    |    |    |   |                |                 |    |       |   |
|----------------------------|-------|----|----|----|---|----------------|-----------------|----|-------|---|
| S13_vs_937821[full]        | 2343  | No | NA | 0  | 3 | Not-determined | Genome-fragment | NA | 2.63  | 0 |
| S8_extracted_k141_183915   | 1286  | No | NA | 0  | 0 | Low-quality    | Genome-fragment | NA | 1.74  | 0 |
| S8_extracted_k141_178362   | 1286  | No | NA | 0  | 0 | Low-quality    | Genome-fragment | NA | 0.84  | 0 |
| S13_vs_942333[full]        | 2290  | No | NA | 0  | 3 | Not-determined | Genome-fragment | NA | 2.31  | 0 |
| S17_extracted_k141_74432   | 1287  | No | NA | 0  | 1 | Low-quality    | Genome-fragment | NA | 0.95  | 0 |
| S13_vs_945222[full]        | 1744  | No | NA | 0  | 0 | Not-determined | Genome-fragment | NA | 3.56  | 0 |
| S11_extracted_k141_89684   | 1287  | No | NA | 0  | 0 | Low-quality    | Genome-fragment | NA | 0     | 0 |
| S13_extracted_108364       | 1287  | No | NA | 0  | 1 | Low-quality    | Genome-fragment | NA | 0     | 0 |
| S14_vs_k141_761061[full]   | 1287  | No | NA | 0  | 0 | Low-quality    | Genome-fragment | NA | 0     | 0 |
| S13_vs_948991[full]        | 1743  | No | NA | 0  | 1 | Not-determined | Genome-fragment | NA | 0     | 0 |
| S13_vs_949811[full]        | 5188  | No | NA | 0  | 3 | Not-determined | Genome-fragment | NA | 0     | 0 |
| S13_vs_k141_1185531[full]  | 1287  | No | NA | 0  | 0 | Low-quality    | Genome-fragment | NA | 3.34  | 0 |
| S13_vs_952171[full]        | 1558  | No | NA | 0  | 2 | Not-determined | Genome-fragment | NA | 0     | 0 |
| S13_vs_952931[full]        | 2221  | No | NA | 0  | 1 | Not-determined | Genome-fragment | NA | 0     | 0 |
| S13_vs_955211[full]        | 1201  | No | NA | 0  | 0 | Not-determined | Genome-fragment | NA | 0     | 0 |
| S5_extracted_k141_68756    | 1287  | No | NA | 1  | 0 | Low-quality    | Genome-fragment | NA | 2.33  | 0 |
| S7_vs_66721[full]          | 1287  | No | NA | 2  | 0 | Low-quality    | Genome-fragment | NA | 2.88  | 0 |
| S16_extracted_28204        | 1287  | No | NA | 1  | 0 | Low-quality    | Genome-fragment | NA | 3.16  | 0 |
| S16_extracted_29237        | 1287  | No | NA | 1  | 0 | Low-quality    | Genome-fragment | NA | 3.21  | 0 |
| S13_vs_962421[full]        | 2606  | No | NA | 0  | 2 | Not-determined | Genome-fragment | NA | 0     | 0 |
| S16_vs_442191[full]        | 1287  | No | NA | 0  | 0 | Low-quality    | Genome-fragment | NA | 1.74  | 0 |
| S10_extracted_64265        | 1287  | No | NA | 0  | 0 | Low-quality    | Genome-fragment | NA | 3.13  | 0 |
| S10_vs_541001[full]        | 1287  | No | NA | 1  | 0 | Low-quality    | Genome-fragment | NA | 2.72  | 0 |
| S13_vs_971421[full]        | 4751  | No | NA | 0  | 1 | Not-determined | Genome-fragment | NA | 2.13  | 0 |
| S4_extracted_15117         | 1287  | No | NA | 1  | 0 | Low-quality    | Genome-fragment | NA | 0     | 0 |
| S13_vs_972471[full]        | 6062  | No | NA | 0  | 2 | Not-determined | Genome-fragment | NA | 0     | 0 |
| S13_vs_973131[full]        | 1310  | No | NA | 0  | 1 | Not-determined | Genome-fragment | NA | 1.38  | 0 |
| S8_extracted_k141_191341   | 1287  | No | NA | 0  | 0 | Low-quality    | Genome-fragment | NA | 2.31  | 0 |
| S17_extracted_k141_15290   | 1288  | No | NA | 0  | 1 | Low-quality    | Genome-fragment | NA | 3.01  | 0 |
| S9_vs_k141_12881[full]     | 1288  | No | NA | 0  | 1 | Low-quality    | Genome-fragment | NA | 0     | 0 |
| S13_vs_978321[full]        | 1372  | No | NA | 0  | 1 | Not-determined | Genome-fragment | NA | 3.24  | 0 |
| S11_extracted_k141_30481   | 1288  | No | NA | 0  | 0 | Low-quality    | Genome-fragment | NA | 0     | 0 |
| S13_vs_981601[full]        | 1125  | No | NA | 0  | 0 | Not-determined | Genome-fragment | NA | 0.91  | 0 |
| S13_vs_677341[full]        | 1288  | No | NA | 0  | 1 | Low-quality    | Genome-fragment | NA | 0.86  | 0 |
| S1_vs_k141_1595621[full]   | 1288  | No | NA | 0  | 0 | Low-quality    | Genome-fragment | NA | 85.63 | 0 |
| S5_vs_k141_13211[full]     | 1288  | No | NA | 0  | 0 | Low-quality    | Genome-fragment | NA | 2.52  | 0 |
| S13_vs_985911[full]        | 36816 | No | NA | 21 | 0 | Medium-quality | Genome-fragment | NA | 2     | 0 |
| S16_vs_447661[full]        | 1288  | No | NA | 2  | 0 | Low-quality    | Genome-fragment | NA | 0.99  | 0 |
| S6_extracted_k141_36680    | 1288  | No | NA | 0  | 0 | Low-quality    | Genome-fragment | NA | 3.13  | 0 |
| S6_vs_k141_7081[full]      | 1288  | No | NA | 0  | 0 | Low-quality    | Genome-fragment | NA | 2.13  | 0 |
| S17_vs_k141_478071[full]   | 1289  | No | NA | 0  | 0 | Low-quality    | Genome-fragment | NA | 1.72  | 0 |
| S13_vs_988801[full]        | 1254  | No | NA | 0  | 0 | Not-determined | Genome-fragment | NA | 0     | 0 |
| S13_vs_988861[full]        | 1136  | No | NA | 0  | 0 | Not-determined | Genome-fragment | NA | 0     | 0 |
| S9_vs_k141_668021[full]    | 1289  | No | NA | 0  | 0 | Low-quality    | Genome-fragment | NA | 2.17  | 0 |
| S13_vs_989861[full]        | 5752  | No | NA | 0  | 4 | Not-determined | Genome-fragment | NA | 3.47  | 0 |
| S9_vs_k141_514751[102gene] | 1289  | No | NA | 0  | 0 | Low-quality    | Genome-fragment | NA | 2.05  | 0 |
| S11_vs_k141_327831[full]   | 1289  | No | NA | 0  | 0 | Low-quality    | Genome-fragment | NA | 1.82  | 0 |
| S13_vs_178461[full]        | 1289  | No | NA | 1  | 0 | Low-quality    | Genome-fragment | NA | 0.89  | 0 |
| S13_vs_505391[full]        | 1370  | No | NA | 0  | 0 | Not-determined | Genome-fragment | NA | 1.13  | 0 |
| S1_vs_k141_1048211[full]   | 1289  | No | NA | 0  | 0 | Low-quality    | Genome-fragment | NA | 1.63  | 0 |
| S1_vs_k141_165541[102gene] | 1289  | No | NA | 1  | 0 | Low-quality    | Genome-fragment | NA | 0     | 0 |
| S7_extracted_7051          | 1289  | No | NA | 0  | 0 | Low-quality    | Genome-fragment | NA | 0     | 0 |
| S10_extracted_90424        | 1289  | No | NA | 0  | 1 | Low-quality    | Genome-fragment | NA | 0     | 0 |
| S13_vs_1000131[full]       | 2521  | No | NA | 0  | 1 | Not-determined | Genome-fragment | NA | 1.71  | 0 |
| S13_vs_1000771[full]       | 16410 | No | NA | 0  | 7 | Not-determined | Genome-fragment | NA | 0     | 0 |
| S10_vs_48481[102gene]      | 1289  | No | NA | 0  | 0 | Low-quality    | Genome-fragment | NA | 0     | 0 |
| S13_vs_1003671[full]       | 2131  | No | NA | 0  | 2 | Not-determined | Genome-fragment | NA | 0     | 0 |
| S13_vs_1003711[full]       | 2696  | No | NA | 0  | 0 | Not-determined | Genome-fragment | NA | 0     | 0 |
| S13_vs_1004681[full]       | 2141  | No | NA | 0  | 0 | Not-determined | Genome-fragment | NA | 0     | 0 |
| S13_vs_1005591[full]       | 3871  | No | NA | 0  | 1 | Not-determined | Genome-fragment | NA | 0     | 0 |
| S13_vs_1006311[full]       | 3266  | No | NA | 0  | 0 | Not-determined | Genome-fragment | NA | 2.33  | 0 |
| S13_vs_1006901[full]       | 3484  | No | NA | 0  | 2 | Not-determined | Genome-fragment | NA | 2.34  | 0 |
| S12_vs_k141_1165591[full]  | 1289  | No | NA | 0  | 0 | Low-quality    | Genome-fragment | NA | 0.85  | 0 |
| S8_extracted_k141_123850   | 1289  | No | NA | 0  | 0 | Low-quality    | Genome-fragment | NA | 0     | 0 |
| S13_vs_1015411[full]       | 1097  | No | NA | 0  | 0 | Not-determined | Genome-fragment | NA | 0     | 0 |
| S8_extracted_k141_11415    | 1289  | No | NA | 0  | 1 | Low-quality    | Genome-fragment | NA | 0     | 0 |
| S13_vs_1021461[full]       | 1036  | No | NA | 0  | 0 | Not-determined | Genome-fragment | NA | 0     | 0 |
| S13_vs_1022871[full]       | 8212  | No | NA | 0  | 8 | Not-determined | Genome-fragment | NA | 0     | 0 |
| S13_vs_1023561[full]       | 3628  | No | NA | 0  | 0 | Not-determined | Genome-fragment | NA | 0     | 0 |
| S13_vs_1028841[full]       | 4274  | No | NA | 0  | 0 | Not-determined | Genome-fragment | NA | 0     | 0 |
| S13_vs_1028991[full]       | 1378  | No | NA | 0  | 0 | Not-determined | Genome-fragment | NA | 0     | 0 |
| S13_vs_1030901[full]       | 1147  | No | NA | 0  | 0 | Not-determined | Genome-fragment | NA | 2.21  | 0 |
| S17_extracted_k141_118112  | 1290  | No | NA | 0  | 1 | Low-quality    | Genome-fragment | NA | 0     | 0 |
| S13_vs_1031611[full]       | 2251  | No | NA | 0  | 0 | Not-determined | Genome-fragment | NA | 0     | 0 |
| S13_vs_1032781[full]       | 1165  | No | NA | 0  | 0 | Not-determined | Genome-fragment | NA | 0     | 0 |
| S13_vs_1033221[full]       | 1014  | No | NA | 0  | 2 | Not-determined | Genome-fragment | NA | 0     | 0 |
| S13_vs_1035951[full]       | 1842  | No | NA | 0  | 2 | Not-determined | Genome-fragment | NA | 0     | 0 |
| S13_vs_1037511[full]       | 1992  | No | NA | 0  | 0 | Not-determined | Genome-fragment | NA | 0.77  | 0 |
| S9_extracted_k141_29218    | 1290  | No | NA | 0  | 0 | Low-quality    | Genome-fragment | NA | 0.8   | 0 |
| S9_vs_k141_23551[102gene]  | 1290  | No | NA | 1  | 0 | Low-quality    | Genome-fragment | NA | 0     | 0 |
| S13_vs_1041581[full]       | 1369  | No | NA | 0  | 0 | Not-determined | Genome-fragment | NA | 0.21  | 0 |
| S13_vs_1043671[full]       | 5223  | No | NA | 0  | 3 | Not-determined | Genome-fragment | NA | 0     | 0 |
| S13_vs_1043831[full]       | 6492  | No | NA | 0  | 0 | Low-quality    | Genome-fragment | NA | 0     | 0 |
| S14_extracted_k141_72646   | 1290  | No | NA | 0  | 0 | Low-quality    | Genome-fragment | NA | 0     | 0 |
| S13_vs_1044581[full]       | 2132  | No | NA | 0  | 1 | Not-determined | Genome-fragment | NA | 3.55  | 0 |
| S13_vs_1045171[full]       | 1065  | No | NA | 0  | 1 | Not-determined | Genome-fragment | NA | 2.64  | 0 |
| S14_vs_k141_527391[full]   | 1290  | No | NA | 3  | 0 | Low-quality    | Genome-fragment | NA | 0     | 0 |
| S13_vs_1046061[full]       | 1419  | No | NA | 0  | 2 | Not-determined | Genome-fragment | NA | 0     | 0 |
| S14_vs_k141_135201[full]   | 1290  | No | NA | 0  | 0 | Low-quality    | Genome-fragment | NA | 0     | 0 |
| S13_vs_1049401[full]       | 2344  | No | NA | 0  | 1 | Not-determined | Genome-fragment | NA | 0     | 0 |
| S13_vs_1049461[full]       | 1006  | No | NA | 0  | 0 | Not-determined | Genome-fragment | NA | 0     | 0 |
| S13_vs_1050971[full]       | 2626  | No | NA | 0  | 2 | Not-determined | Genome-fragment | NA | 2.22  | 0 |
| S13_vs_1053371[full]       | 2850  | No | NA | 0  | 2 | Not-determined | Genome-fragment | NA | 0.92  | 0 |
| S5_extracted_k141_88410    | 1290  | No | NA | 0  | 0 | Low-quality    | Genome-fragment | NA | 1.73  | 0 |
| S5_vs_k141_173081[full]    | 1290  | No | NA | 0  | 0 | Low-quality    | Genome-fragment | NA | 0     | 0 |
| S7_extracted_29858         | 1290  | No | NA | 1  | 0 | Low-quality    | Genome-fragment | NA | 0     | 0 |
| S13_vs_1054911[full]       | 4169  | No | NA | 0  | 2 | Not-determined | Genome-fragment | NA | 0     | 0 |
| S13_vs_1057581[full]       | 2284  | No | NA | 0  | 1 | Not-determined | Genome-fragment | NA | 0     | 0 |
| S13_vs_1058861[full]       | 4455  | No | NA | 0  | 2 | Not-determined | Genome-fragment | NA | 9.56  | 0 |
| S7_extracted_126646        | 1290  | No | NA | 2  | 0 | Low-quality    | Genome-fragment | NA | 0     | 0 |
| S13_vs_1059741[full]       | 1148  | No | NA | 0  | 0 | Not-determined | Genome-fragment | NA | 2.3   | 0 |
| S13_vs_1061291[full]       | 1878  | No | NA | 0  | 2 | Not-determined | Genome-fragment | NA | 0     | 0 |
| S7_vs_54281[full]          | 1290  | No | NA | 1  | 0 | Low-quality    | Genome-fragment | NA | 0     | 0 |
| S13_vs_1064741[full]       | 1262  | No | NA | 0  | 0 | Not-determined | Genome-fragment | NA | 0     | 0 |
| S13_vs_1065041[full]       | 3345  | No | NA | 0  | 3 | Not-determined | Genome-fragment | NA | 0     | 0 |
| S13_vs_1066671[full]       | 2997  | No | NA | 0  | 1 | Not-determined | Genome-fragment | NA | 0     | 0 |
| S13_vs_1071051[full]       | 1192  | No | NA | 0  | 1 | Not-determined | Genome-fragment | NA | 0     | 0 |
| S13_vs_1072231[full]       | 1733  | No | NA | 0  | 2 | Not-determined | Genome-fragment | NA | 0     | 0 |
| S13_vs_1074051[full]       | 2864  | No | NA | 0  | 2 | Not-determined | Genome-fragment | NA | 0     | 0 |
| S13_vs_1074651[full]       | 1375  | No | NA | 0  | 0 | Not-determined | Genome-fragment | NA | 2.21  | 0 |
| S7_vs_523091[full]         | 1290  | No | NA | 0  | 0 | Low-quality    | Genome-fragment | NA | 3.03  | 0 |
| S7_vs_408301[102gene]      | 1290  | No | NA | 0  | 0 | Low-quality    | Genome-fragment | NA | 0     | 0 |
| S13_vs_1077191[full]       | 1437  | No | NA | 0  | 1 | Not-determined | Genome-fragment | NA | 0     | 0 |
| S13_vs_1077271[full]       | 1423  | No | NA | 0  | 0 | Not-determined | Genome-fragment | NA | 0     | 0 |
| S13_vs_1079631[full]       | 5570  | No | NA | 1  | 0 | Not-determined | Genome-fragment | NA | 0     | 0 |
| S13_vs_1079901[full]       | 1577  | No | NA | 0  | 2 | Not-determined | Genome-fragment | NA | 0     | 0 |
| S13_vs_1080311[full]       | 2148  | No | NA | 0  | 0 | Not-determined | Genome-fragment | NA | 0     | 0 |
| S13_vs_1080471[full]       | 1096  | No | NA | 0  | 0 | Not-determined | Genome-fragment | NA | 0     | 0 |
| S13_vs_1080691[full]       | 4513  | No | NA | 0  | 5 | Not-determined | Genome-fragment | NA | 0     | 0 |
| S13_vs_1081201[full]       | 1447  | No | NA | 0  | 2 | Not-determined | Genome-fragment | NA | 0     | 0 |
| S13_vs_1082521[full]       | 7266  | No | NA | 0  | 4 | Not-determined | Genome-fragment | NA | 3.26  | 0 |
| S10_extracted_29366        | 1290  | No | NA | 0  | 0 | Low-quality    | Genome-fragment | NA | 0     | 0 |
| S13_vs_1083811[full]       | 2328  | No | NA | 0  | 1 | Not-determined | Genome-fragment | NA | 0     | 0 |
| S13_vs_1084451[full]       | 1389  | No | NA | 0  | 0 | Not-determined | Genome-fragment | NA | 3.01  | 0 |
| S13_vs_1084631[full]       | 2954  | No | NA | 0  | 1 | Not-determined | Genome-fragment | NA | 2.93  | 0 |
| S8_vs_k141_1997721[full]   | 1290  | No | NA | 2  | 0 | Low-quality    | Genome-fragment | NA | 2.76  | 0 |
| S8_vs_k141_1882761[full]   | 1290  | No | NA | 0  | 0 | Low-quality    | Genome-fragment | NA | 0     | 0 |
| S13_vs_1091601[full]       | 2548  | No | NA | 0  | 3 | Not-determined | Genome-fragment | NA | 0     | 0 |
| S17_vs_k141_1507321[full]  | 1291  | No | NA | 2  | 0 | Low-quality    | Genome-fragment | NA | 0     | 0 |
| S13_vs_1095151[full]       | 1863  | No | NA | 0  | 1 | Not-determined | Genome-fragment | NA | 0     | 0 |
| S13_vs_1096611[full]       | 3021  | No | NA | 0  | 0 | Not-determined | Genome-fragment | NA | 0     | 0 |
| S13_vs_1100591[full]       | 2859  | No | NA | 0  | 2 | Not-determined | Genome-fragment | NA | 2.05  | 0 |
| S9_vs_k141_226261[full]    | 1291  | No | NA | 0  | 0 | Low-quality    | Genome-fragment | NA | 0     | 0 |
| S13_vs_1105721[full]       | 1798  | No | NA | 0  | 1 | Not-determined | Genome-fragment | NA | 3.03  | 0 |
| S13_vs_1106221[full]       | 1771  | No | NA | 0  | 2 | Not-determined | Genome-fragment | NA | 0     | 0 |
| S13_vs_1106731[full]       | 6112  | No | NA | 0  | 3 | Not-determined | Genome-fragment | NA | 0     |   |



|                              |       |    |    |   |   |                |                 |      |       |
|------------------------------|-------|----|----|---|---|----------------|-----------------|------|-------|
| S8_extracted_k141_155630     | 1291  | No | NA | 0 | 0 | Low-quality    | Genome-fragment | 2.12 | 0     |
| S13_vo_115136  full          | 4612  | No | NA | 0 | 4 | Not-determined | Genome-fragment | NA   | 0     |
| S8_vo_k141_177024  full      | 1291  | No | NA | 0 | 0 | Low-quality    | Genome-fragment | NA   | 0.97  |
| S13_vo_115285  full          | 1073  | No | NA | 0 | 1 | Not-determined | Genome-fragment | NA   | 0     |
| S13_vo_115310  full          | 1895  | No | NA | 0 | 0 | Not-determined | Genome-fragment | NA   | 0     |
| S13_vo_115584  full          | 2170  | No | NA | 0 | 0 | Not-determined | Genome-fragment | NA   | 2.01  |
| S13_vo_115675  full          | 2048  | No | NA | 0 | 1 | Not-determined | Genome-fragment | NA   | 0     |
| S13_vo_115730  full          | 1766  | No | NA | 0 | 1 | Not-determined | Genome-fragment | NA   | 0     |
| S11_vo_k141_141281  full     | 1292  | No | NA | 0 | 0 | Low-quality    | Genome-fragment | NA   | 0.63  |
| S13_vo_116049  full          | 3425  | No | NA | 0 | 3 | Not-determined | Genome-fragment | NA   | 0     |
| S13_vo_116102  full          | 1401  | No | NA | 0 | 0 | Not-determined | Genome-fragment | NA   | 0     |
| S14_vo_k141_58005  full      | 1292  | No | NA | 0 | 0 | Low-quality    | Genome-fragment | NA   | 0.74  |
| S13_vo_116294  full          | 1699  | No | NA | 0 | 0 | Not-determined | Genome-fragment | NA   | 0     |
| S14_vo_k141_56199  full      | 1292  | No | NA | 0 | 0 | Low-quality    | Genome-fragment | NA   | 3.91  |
| S14_vo_k141_54689  full      | 1292  | No | NA | 1 | 0 | Low-quality    | Genome-fragment | NA   | 2.77  |
| S13_vo_117422  full          | 1512  | No | NA | 0 | 1 | Not-determined | Genome-fragment | NA   | 0     |
| S13_vo_117683  full          | 2387  | No | NA | 0 | 2 | Not-determined | Genome-fragment | NA   | 0     |
| S1_vo_k141_78912  full       | 1292  | No | NA | 1 | 0 | Low-quality    | Genome-fragment | NA   | 2.54  |
| S5_vo_k141_1462  full        | 1292  | No | NA | 0 | 0 | Low-quality    | Genome-fragment | NA   | 3.67  |
| S5_vo_k141_53234  H2genome   | 1292  | No | NA | 1 | 0 | Low-quality    | Genome-fragment | NA   | 2.97  |
| S13_vo_118442  full          | 5123  | No | NA | 0 | 4 | Not-determined | Genome-fragment | NA   | 0     |
| S13_vo_118461  full          | 3154  | No | NA | 0 | 3 | Not-determined | Genome-fragment | NA   | 0     |
| S13_vo_118462  full          | 1551  | No | NA | 0 | 2 | Not-determined | Genome-fragment | NA   | 0     |
| S7_extracted_59357           | 1292  | No | NA | 1 | 0 | Low-quality    | Genome-fragment | NA   | 2.26  |
| S7_extracted_79538           | 1292  | No | NA | 0 | 0 | Low-quality    | Genome-fragment | NA   | 2.33  |
| S13_vo_119066  full          | 1615  | No | NA | 0 | 1 | Not-determined | Genome-fragment | NA   | 0     |
| S13_vo_119122  full          | 4839  | No | NA | 0 | 3 | Not-determined | Genome-fragment | NA   | 0     |
| S13_vo_119144  full          | 1050  | No | NA | 0 | 2 | Not-determined | Genome-fragment | NA   | 0     |
| S12_vo_119401  full          | 1538  | No | NA | 0 | 1 | Not-determined | Genome-fragment | NA   | 0     |
| S7_vo_35639  full            | 1292  | No | NA | 1 | 0 | Low-quality    | Genome-fragment | NA   | 2.73  |
| S7_vo_106077  full           | 1292  | No | NA | 0 | 0 | Low-quality    | Genome-fragment | NA   | 3.34  |
| S16_vo_166188  full          | 1292  | No | NA | 0 | 0 | Low-quality    | Genome-fragment | NA   | 2.01  |
| S12_extracted_k141_126570    | 1292  | No | NA | 0 | 1 | Low-quality    | Genome-fragment | NA   | 1.21  |
| S13_vo_120386  full          | 1763  | No | NA | 0 | 0 | Not-determined | Genome-fragment | NA   | 0     |
| S13_vo_120521  full          | 2684  | No | NA | 0 | 1 | Not-determined | Genome-fragment | NA   | 0     |
| S13_vo_120725  full          | 2144  | No | NA | 0 | 2 | Not-determined | Genome-fragment | NA   | 0     |
| S13_vo_120787  full          | 1346  | No | NA | 0 | 2 | Not-determined | Genome-fragment | NA   | 0     |
| S13_vo_120793  full          | 2757  | No | NA | 0 | 3 | Not-determined | Genome-fragment | NA   | 0     |
| S8_vo_k141_1346  full        | 1292  | No | NA | 0 | 1 | Low-quality    | Genome-fragment | NA   | 2.25  |
| S13_vo_120975  full          | 1928  | No | NA | 0 | 1 | Not-determined | Genome-fragment | NA   | 0     |
| S8_vo_k141_31266  full       | 1292  | No | NA | 1 | 0 | Low-quality    | Genome-fragment | NA   | 3.17  |
| S13_extracted_137915         | 1293  | No | NA | 0 | 0 | Low-quality    | Genome-fragment | NA   | 2.14  |
| S13_vo_121307  full          | 20430 | No | NA | 3 | 1 | Medium-quality | Genome-fragment | NA   | 53.16 |
| S13_vo_121392  full          | 1571  | No | NA | 0 | 1 | Not-determined | Genome-fragment | NA   | 0     |
| S13_vo_121608  full          | 3029  | No | NA | 0 | 1 | Not-determined | Genome-fragment | NA   | 0     |
| S13_extracted_152131         | 1293  | No | NA | 0 | 1 | Low-quality    | Genome-fragment | NA   | 2.59  |
| S1_vo_k141_6465  full        | 1293  | No | NA | 0 | 0 | Low-quality    | Genome-fragment | NA   | 2.86  |
| S13_vo_122124  full          | 3545  | No | NA | 0 | 1 | Not-determined | Genome-fragment | NA   | 0     |
| S13_vo_122581  full          | 2752  | No | NA | 0 | 2 | Not-determined | Genome-fragment | NA   | 0     |
| S13_vo_122600  full          | 2803  | No | NA | 0 | 3 | Not-determined | Genome-fragment | NA   | 0     |
| S13_vo_122910  full          | 2212  | No | NA | 0 | 0 | Not-determined | Genome-fragment | NA   | 0     |
| S2_extracted_k141_10869      | 1292  | No | NA | 0 | 1 | Low-quality    | Genome-fragment | NA   | 1.09  |
| S13_vo_123058  full          | 2879  | No | NA | 0 | 3 | Not-determined | Genome-fragment | NA   | 0     |
| S5_vo_k141_96618  full       | 1293  | No | NA | 0 | 0 | Low-quality    | Genome-fragment | NA   | 3.4   |
| S12_vo_123251  full          | 1026  | No | NA | 0 | 2 | Not-determined | Genome-fragment | NA   | 0     |
| S13_vo_123253  full          | 1819  | No | NA | 0 | 1 | Not-determined | Genome-fragment | NA   | 0     |
| S13_vo_123304  full          | 1973  | No | NA | 0 | 0 | Not-determined | Genome-fragment | NA   | 0     |
| S13_vo_123486  full          | 1724  | No | NA | 0 | 1 | Not-determined | Genome-fragment | NA   | 0     |
| S13_vo_123495  full          | 1868  | No | NA | 0 | 0 | Not-determined | Genome-fragment | NA   | 0     |
| S7_extracted_14239           | 1293  | No | NA | 2 | 0 | Low-quality    | Genome-fragment | NA   | 2.31  |
| S13_vo_123651  full          | 5432  | No | NA | 0 | 1 | Not-determined | Genome-fragment | NA   | 3.76  |
| S7_vo_115405  full           | 1293  | No | NA | 0 | 0 | Low-quality    | Genome-fragment | NA   | 0     |
| S13_vo_123987  full          | 2301  | No | NA | 0 | 3 | Not-determined | Genome-fragment | NA   | 0     |
| S13_vo_124264  full          | 1420  | No | NA | 0 | 0 | Not-determined | Genome-fragment | NA   | 0     |
| S16_extracted_114416         | 1293  | No | NA | 0 | 1 | Low-quality    | Genome-fragment | NA   | 2.77  |
| S8_extracted_k141_28516      | 1293  | No | NA | 0 | 0 | Low-quality    | Genome-fragment | NA   | 0.97  |
| S13_vo_124622  full          | 1614  | No | NA | 0 | 0 | Not-determined | Genome-fragment | NA   | 0     |
| S13_vo_124830  full          | 4025  | No | NA | 0 | 3 | Not-determined | Genome-fragment | NA   | 0     |
| S13_vo_124829  full          | 1697  | No | NA | 0 | 0 | Not-determined | Genome-fragment | NA   | 0     |
| S13_vo_125459  full          | 1356  | No | NA | 0 | 1 | Not-determined | Genome-fragment | NA   | 0     |
| S8_vo_k141_18479  full       | 1293  | No | NA | 2 | 0 | Low-quality    | Genome-fragment | NA   | 2.3   |
| S13_vo_126016  full          | 1340  | No | NA | 0 | 0 | Not-determined | Genome-fragment | NA   | 0     |
| S13_vo_126059  full          | 3127  | No | NA | 0 | 3 | Not-determined | Genome-fragment | NA   | 0     |
| S13_vo_126245  full          | 2569  | No | NA | 0 | 2 | Not-determined | Genome-fragment | NA   | 0     |
| S13_vo_126340  full          | 1261  | No | NA | 0 | 2 | Not-determined | Genome-fragment | NA   | 0     |
| S11_extracted_k141_96330     | 1294  | No | NA | 0 | 0 | Low-quality    | Genome-fragment | NA   | 2.68  |
| S13_vo_91288  full           | 1294  | No | NA | 0 | 0 | Low-quality    | Genome-fragment | NA   | 0.92  |
| S13_vo_126858  full          | 1379  | No | NA | 0 | 2 | Not-determined | Genome-fragment | NA   | 0     |
| S13_vo_126870  full          | 2844  | No | NA | 0 | 1 | Not-determined | Genome-fragment | NA   | 0     |
| S14_extracted_k141_93334     | 1294  | No | NA | 3 | 0 | Low-quality    | Genome-fragment | NA   | 2.15  |
| S13_vo_127009  full          | 1088  | No | NA | 0 | 0 | Not-determined | Genome-fragment | NA   | 0     |
| S13_vo_127088  full          | 4864  | No | NA | 0 | 0 | Not-determined | Genome-fragment | NA   | 0     |
| S13_vo_127196  full          | 2079  | No | NA | 0 | 0 | Not-determined | Genome-fragment | NA   | 0     |
| S13_vo_127354  full          | 1124  | No | NA | 0 | 0 | Not-determined | Genome-fragment | NA   | 0     |
| S13_vo_127603  full          | 6598  | No | NA | 0 | 4 | Not-determined | Genome-fragment | NA   | 0     |
| S14_vo_k141_12821  full      | 1294  | No | NA | 1 | 0 | Low-quality    | Genome-fragment | NA   | 4.16  |
| S14_vo_k141_56878  full      | 1294  | No | NA | 0 | 0 | Low-quality    | Genome-fragment | NA   | 1.37  |
| S5_vo_k141_97155  full       | 1294  | No | NA | 0 | 2 | Low-quality    | Genome-fragment | NA   | 0.43  |
| S13_vo_127862  full          | 2861  | No | NA | 0 | 0 | Not-determined | Genome-fragment | NA   | 0     |
| S5_vo_k141_137066  full      | 1294  | No | NA | 0 | 1 | Low-quality    | Genome-fragment | NA   | 0.81  |
| S7_vo_63696  full            | 1294  | No | NA | 0 | 0 | Low-quality    | Genome-fragment | NA   | 1.08  |
| S7_vo_127551  full           | 1294  | No | NA | 0 | 0 | Low-quality    | Genome-fragment | NA   | 2.66  |
| S13_vo_128358  full          | 2319  | No | NA | 0 | 1 | Not-determined | Genome-fragment | NA   | 0     |
| S16_extracted_158911         | 1294  | No | NA | 1 | 0 | Low-quality    | Genome-fragment | NA   | 3.08  |
| S13_vo_128552  full          | 1433  | No | NA | 0 | 1 | Not-determined | Genome-fragment | NA   | 0     |
| S13_vo_128637  full          | 3131  | No | NA | 0 | 1 | Not-determined | Genome-fragment | NA   | 0     |
| S13_vo_128781  full          | 3617  | No | NA | 0 | 1 | Not-determined | Genome-fragment | NA   | 0     |
| S13_vo_129132  full          | 1509  | No | NA | 0 | 0 | Not-determined | Genome-fragment | NA   | 0     |
| S16_vo_130471  full          | 1294  | No | NA | 0 | 0 | Low-quality    | Genome-fragment | NA   | 2.09  |
| S8_vo_k141_107910  full      | 1294  | No | NA | 2 | 0 | Low-quality    | Genome-fragment | NA   | 2.73  |
| S13_vo_129367  full          | 2078  | No | NA | 0 | 3 | Not-determined | Genome-fragment | NA   | 0     |
| S13_vo_129410  full          | 1471  | No | NA | 0 | 1 | Not-determined | Genome-fragment | NA   | 0     |
| S13_vo_129498  full          | 1829  | No | NA | 0 | 1 | Not-determined | Genome-fragment | NA   | 0     |
| S13_vo_129602  full          | 2446  | No | NA | 0 | 1 | Not-determined | Genome-fragment | NA   | 0     |
| S13_vo_129705  full          | 1110  | No | NA | 0 | 1 | Not-determined | Genome-fragment | NA   | 0     |
| S17_vo_k141_138596  full     | 1295  | No | NA | 0 | 0 | Low-quality    | Genome-fragment | NA   | 0.88  |
| S13_vo_130179  full          | 1167  | No | NA | 0 | 1 | Not-determined | Genome-fragment | NA   | 0     |
| S9_vo_k141_19922  full       | 1295  | No | NA | 1 | 0 | Low-quality    | Genome-fragment | NA   | 3.18  |
| S13_vo_130465  full          | 1163  | No | NA | 0 | 1 | Not-determined | Genome-fragment | NA   | 0     |
| S11_extracted_k141_11699     | 1295  | No | NA | 0 | 1 | Low-quality    | Genome-fragment | NA   | 0.68  |
| S13_vo_130713  full          | 2238  | No | NA | 0 | 0 | Not-determined | Genome-fragment | NA   | 0     |
| S13_vo_130925  full          | 6001  | No | NA | 0 | 4 | Not-determined | Genome-fragment | NA   | 0     |
| S13_vo_130939  full          | 1559  | No | NA | 0 | 0 | Not-determined | Genome-fragment | NA   | 0     |
| S11_vo_k141_103680  H2genome | 1295  | No | NA | 1 | 0 | Low-quality    | Genome-fragment | NA   | 2.45  |
| S12_vo_131251  full          | 2851  | No | NA | 2 | 2 | Not-determined | Genome-fragment | NA   | 4.55  |
| S14_extracted_k141_95604     | 1295  | No | NA | 2 | 0 | Low-quality    | Genome-fragment | NA   | 0     |
| S13_vo_131227  full          | 1535  | No | NA | 0 | 1 | Not-determined | Genome-fragment | NA   | 0     |
| S5_extracted_k141_930        | 1295  | No | NA | 0 | 0 | Low-quality    | Genome-fragment | NA   | 3.12  |
| S5_extracted_k141_138969     | 1295  | No | NA | 0 | 0 | Low-quality    | Genome-fragment | NA   | 2.37  |
| S13_vo_131689  full          | 6448  | No | NA | 0 | 2 | Not-determined | Genome-fragment | NA   | 0     |
| S13_vo_131724  full          | 1281  | No | NA | 0 | 2 | Not-determined | Genome-fragment | NA   | 0     |
| S5_vo_k141_16013  full       | 1295  | No | NA | 0 | 0 | Low-quality    | Genome-fragment | NA   | 3.56  |
| S13_vo_132105  full          | 3775  | No | NA | 0 | 1 | Not-determined | Genome-fragment | NA   | 0     |
| S13_vo_132182  full          | 1740  | No | NA | 0 | 3 | Not-determined | Genome-fragment | NA   | 0     |
| S5_vo_k141_99388  full       | 1295  | No | NA | 1 | 0 | Low-quality    | Genome-fragment | NA   | 2.74  |
| S12_vo_k141_41682  full      | 1295  | No | NA | 0 | 0 | Low-quality    | Genome-fragment | NA   | 2.07  |
| S15_extracted_38900          | 1295  | No | NA | 0 | 1 | Low-quality    | Genome-fragment | NA   | 0.81  |
| S6_extracted_k141_20615      | 1295  | No | NA | 0 | 0 | Low-quality    | Genome-fragment | NA   | 2.18  |
| S9_vo_k141_73603  full       | 1296  | No | NA | 1 | 0 | Low-quality    | Genome-fragment | NA   | 2.04  |
| S13_vo_133300  full          | 5077  | No | NA | 0 | 2 | Not-determined | Genome-fragment | NA   | 0     |
| S13_vo_133375  full          | 1159  | No | NA | 0 | 0 | Not-determined | Genome-fragment | NA   | 3.16  |
| S9_vo_k141_10565  H2genome   | 1296  | No | NA | 2 | 0 | Low-quality    | Genome-fragment | NA   | 2.16  |
| S9_vo_k141_82546  H2genome   | 1296  | No | NA | 2 | 0 | Low-quality    | Genome-fragment | NA   | 0     |
| S13_vo_133917  full          | 1423  | No | NA | 0 | 1 | Not-determined | Genome-fragment | NA   | 0     |
| S13_vo_134004  full          | 1281  | No | NA | 0 | 0 | Not-determined | Genome-fragment | NA   | 0     |
| S13_vo_134115  full          | 1931  | No | NA | 0 | 3 | Not-determined | Genome-fragment | NA   | 0     |
| S11_extracted_k141_92098     | 1296  | No | NA | 2 | 0 | Low-quality    | Genome-fragment | NA   | 2.91  |
| S13_vo_145555  full          | 1296  | No | NA | 2 | 0 | Low-quality    | Genome-fragment | NA   | 2.31  |
| S13_vo_135018  full          | 1917  | No | NA | 0 | 0 | Not-determined | Genome-fragment | NA   | 0     |
| S13_vo_64160  full           | 1296  | No | NA | 0 | 2 | Low-quality    | Genome-fragment | NA   | 0.49  |
| S13_vo_135119  full          | 1119  | No | NA | 0 | 0 | Not-determined | Genome-fragment | NA   | 1.32  |
| S1_extracted_k141_8143       | 1296  | No | NA | 1 | 0 | Low-quality    | Genome-fragment | NA   | 0     |
| S13_vo_135200  full          | 2217  | No | NA | 0 | 1 | Not-determined | Genome-fragment | NA   | 0     |
| S13_vo_135507  full          | 2766  | No | NA | 0 | 1 | Not-determined | Genome-fragment | NA   | 0     |
| S13_vo_135750  full          | 1962  | No | NA | 0 | 0 | Not-determined | Genome-fragment | NA   | 0     |
| S13                          |       |    |    |   |   |                |                 |      |       |



|                           |       |     |     |    |                |                 |                 |      |       |
|---------------------------|-------|-----|-----|----|----------------|-----------------|-----------------|------|-------|
| 58_vs_k141_48294  full    | 1296  | No  | NA  | 0  | 1              | Low-quality     | Genome-fragment | 2.9  | 0     |
| 513_vs_139693  full       | 3276  | No  | NA  | 0  | 3              | Not-determined  | Genome-fragment | NA   | 0     |
| 513_vs_139750  full       | 1306  | No  | NA  | 0  | 0              | Not-determined  | Genome-fragment | NA   | 0     |
| 59_extracted_k141_18881   | 1297  | No  | NA  | 0  | 1              | Low-quality     | Genome-fragment | 0.91 | 0     |
| 513_vs_140391  full       | 2551  | No  | NA  | 0  | 1              | Not-determined  | Genome-fragment | NA   | 0     |
| 513_vs_140564  full       | 3553  | No  | NA  | 0  | 1              | Not-determined  | Genome-fragment | NA   | 0     |
| 53_extracted_k141_36240   | 1297  | No  | NA  | 0  | 0              | Low-quality     | Genome-fragment | 0.8  | 0     |
| 513_vs_141050  full       | 1811  | No  | NA  | 0  | 1              | Not-determined  | Genome-fragment | NA   | 0     |
| 513_vs_141153  full       | 1057  | No  | NA  | 0  | 1              | Not-determined  | Genome-fragment | NA   | 0     |
| 53_extracted_k141_83902   | 1297  | No  | NA  | 0  | 0              | Low-quality     | Genome-fragment | 2.17 | 0     |
| 513_vs_141329  full       | 15942 | No  | NA  | 0  | 3              | Not-determined  | Genome-fragment | NA   | 0     |
| 510_vs_140645  full       | 1297  | No  | NA  | 0  | 0              | Low-quality     | Genome-fragment | 0.36 | 0     |
| 513_vs_141580  full       | 2873  | No  | NA  | 0  | 2              | Not-determined  | Genome-fragment | NA   | 0     |
| 512_extracted_k141_47014  | 1297  | No  | NA  | 1  | 0              | Low-quality     | Genome-fragment | 2.34 | 0     |
| 513_vs_141772  full       | 1636  | No  | NA  | 0  | 2              | Not-determined  | Genome-fragment | NA   | 0     |
| 513_vs_141825  full       | 1282  | No  | NA  | 0  | 0              | Not-determined  | Genome-fragment | NA   | 0     |
| 513_vs_141933  full       | 5929  | No  | NA  | 0  | 2              | Not-determined  | Genome-fragment | NA   | 0     |
| 513_vs_142082  full       | 1376  | No  | NA  | 0  | 0              | Not-determined  | Genome-fragment | NA   | 0     |
| 512_vs_142214  full       | 1067  | No  | NA  | 0  | 1              | Not-determined  | Genome-fragment | NA   | 0     |
| 513_vs_142359  full       | 2493  | No  | NA  | 0  | 2              | Not-determined  | Genome-fragment | NA   | 0     |
| 513_vs_142485  full       | 1039  | No  | NA  | 0  | 1              | Not-determined  | Genome-fragment | NA   | 0     |
| 54_extracted_30620        | 1297  | No  | NA  | 2  | 0              | Low-quality     | Genome-fragment | 2.3  | 0     |
| 56_vs_k141_25903  full    | 1297  | No  | NA  | 0  | 0              | Low-quality     | Genome-fragment | 3.72 | 0     |
| 513_vs_142740  full       | 1422  | No  | NA  | 0  | 0              | Not-determined  | Genome-fragment | NA   | 0     |
| 513_vs_142808  full       | 1888  | No  | NA  | 0  | 0              | Not-determined  | Genome-fragment | NA   | 0     |
| 513_vs_142865  full       | 1419  | No  | NA  | 0  | 4              | Not-determined  | Genome-fragment | NA   | 0     |
| 513_vs_142913  full       | 1331  | No  | NA  | 0  | 0              | Not-determined  | Genome-fragment | NA   | 0     |
| 513_vs_143030  full       | 5790  | No  | NA  | 0  | 1              | Not-determined  | Genome-fragment | NA   | 0     |
| 512_vs_143068  full       | 1367  | No  | NA  | 0  | 1              | Not-determined  | Genome-fragment | NA   | 0     |
| 58_extracted_k141_14442   | 1297  | No  | NA  | 0  | 0              | Low-quality     | Genome-fragment | 2.47 | 0     |
| 513_vs_143304  full       | 2356  | No  | NA  | 0  | 2              | Not-determined  | Genome-fragment | NA   | 0     |
| 513_vs_143385  full       | 2261  | No  | NA  | 0  | 2              | Not-determined  | Genome-fragment | NA   | 0     |
| 517_extracted_k141_76243  | 1298  | No  | NA  | 0  | 0              | Low-quality     | Genome-fragment | 0.81 | 0     |
| 513_vs_143739  full       | 1131  | No  | NA  | 0  | 2              | Not-determined  | Genome-fragment | NA   | 0     |
| 517_extracted_k141_41339  | 1298  | No  | NA  | 3  | 0              | Low-quality     | Genome-fragment | 4.26 | 0     |
| 59_vs_k141_14415  full    | 1298  | No  | NA  | 0  | 0              | Low-quality     | Genome-fragment | 2.4  | 0     |
| 513_vs_144384  full       | 1268  | No  | NA  | 0  | 1              | Not-determined  | Genome-fragment | NA   | 0     |
| 511_vs_k141_30313  full   | 1298  | No  | NA  | 1  | 0              | Low-quality     | Genome-fragment | 2.18 | 0     |
| 513_vs_144572  full       | 1290  | No  | NA  | 0  | 0              | Not-determined  | Genome-fragment | NA   | 0     |
| 513_extracted_8430        | 1298  | No  | NA  | 0  | 0              | Low-quality     | Genome-fragment | 1.44 | 0     |
| 513_vs_144645  full       | 1897  | No  | NA  | 0  | 1              | Not-determined  | Genome-fragment | NA   | 0     |
| 513_vs_144853  full       | 2097  | No  | NA  | 0  | 0              | Not-determined  | Genome-fragment | NA   | 0     |
| 513_vs_145001  full       | 1051  | No  | NA  | 0  | 0              | Not-determined  | Genome-fragment | NA   | 0     |
| 53_extracted_k141_35828   | 1298  | No  | NA  | 3  | 0              | Low-quality     | Genome-fragment | 2.13 | 0     |
| 513_vs_145278  full       | 2773  | No  | NA  | 0  | 6              | Not-determined  | Genome-fragment | NA   | 0     |
| 513_vs_145288  full       | 1285  | No  | NA  | 0  | 2              | Not-determined  | Genome-fragment | NA   | 0     |
| 513_vs_145546  full       | 1772  | No  | NA  | 0  | 2              | Not-determined  | Genome-fragment | NA   | 0     |
| 513_vs_145594  full       | 4475  | No  | NA  | 0  | 0              | Not-determined  | Genome-fragment | NA   | 0     |
| 53_vs_k141_119855  full   | 1298  | No  | NA  | 0  | 1              | Low-quality     | Genome-fragment | 2.69 | 0     |
| 57_extracted_40420        | 1298  | No  | NA  | 1  | 0              | Low-quality     | Genome-fragment | 3.25 | 0     |
| 57_vs_40293  H2gene       | 1298  | No  | NA  | 1  | 0              | Low-quality     | Genome-fragment | 1.72 | 0     |
| 512_vs_146187  full       | 2181  | No  | NA  | 2  | Not-determined | Genome-fragment | NA              | 0    | 0     |
| 512_vs_k141_68844  full   | 1298  | No  | NA  | 1  | 0              | Low-quality     | Genome-fragment | 2.78 | 0     |
| 513_vs_146579  full       | 1767  | No  | NA  | 0  | 2              | Not-determined  | Genome-fragment | NA   | 0     |
| 512_vs_146666  full       | 5983  | No  | NA  | 0  | 1              | Not-determined  | Genome-fragment | NA   | 0     |
| 513_vs_146761  full       | 1275  | No  | NA  | 0  | 1              | Not-determined  | Genome-fragment | NA   | 0     |
| 512_vs_k141_44116  H2gene | 1298  | No  | NA  | 1  | 0              | Low-quality     | Genome-fragment | 3.47 | 0     |
| 513_vs_147159  full       | 1158  | No  | NA  | 0  | 3              | Not-determined  | Genome-fragment | NA   | 0     |
| 513_vs_147712  full       | 1412  | No  | NA  | 0  | 1              | Not-determined  | Genome-fragment | NA   | 0     |
| 58_vs_k141_177812  full   | 1298  | Yes | 539 | 1  | 1              | Low-quality     | Genome-fragment | 0.23 | 58.47 |
| 513_vs_148446  full       | 30296 | No  | NA  | 0  | 10             | Not-determined  | Genome-fragment | NA   | 0     |
| 513_vs_148495  full       | 2561  | No  | NA  | 0  | 3              | Not-determined  | Genome-fragment | NA   | 0     |
| 513_vs_148622  full       | 3284  | No  | NA  | 0  | 2              | Not-determined  | Genome-fragment | NA   | 0     |
| 513_vs_148648  full       | 3188  | No  | NA  | 0  | 2              | Not-determined  | Genome-fragment | NA   | 0     |
| 513_vs_148952  full       | 1391  | No  | NA  | 0  | 0              | Not-determined  | Genome-fragment | NA   | 0     |
| 513_vs_149085  full       | 3786  | No  | NA  | 0  | 4              | Not-determined  | Genome-fragment | NA   | 0     |
| 513_vs_149345  full       | 1010  | No  | NA  | 0  | 1              | Not-determined  | Genome-fragment | NA   | 0     |
| 58_vs_k141_15244  full    | 1298  | No  | NA  | 0  | 1              | Low-quality     | Genome-fragment | 1.3  | 0     |
| 517_vs_k141_57247  full   | 1299  | No  | NA  | 0  | 0              | Low-quality     | Genome-fragment | 3.12 | 0     |
| 513_vs_149596  full       | 1630  | No  | NA  | 0  | 3              | Not-determined  | Genome-fragment | NA   | 0     |
| 513_vs_149597  full       | 1013  | No  | NA  | 0  | 0              | Not-determined  | Genome-fragment | NA   | 0     |
| 511_extracted_k141_455583 | 1299  | No  | NA  | 0  | 0              | Low-quality     | Genome-fragment | 1.82 | 0     |
| 511_vs_k141_93299  full   | 1299  | No  | NA  | 0  | 1              | Low-quality     | Genome-fragment | 2.62 | 0     |
| 513_vs_150073  full       | 1649  | No  | NA  | 0  | 1              | Not-determined  | Genome-fragment | NA   | 0     |
| 513_vs_150216  full       | 1067  | No  | NA  | 0  | 1              | Not-determined  | Genome-fragment | NA   | 0     |
| 513_vs_150252  full       | 1403  | No  | NA  | 0  | 1              | Not-determined  | Genome-fragment | NA   | 0     |
| 513_vs_150379  full       | 4654  | No  | NA  | 0  | 0              | Not-determined  | Genome-fragment | NA   | 0     |
| 514_extracted_k141_81689  | 1299  | No  | NA  | 3  | 0              | Low-quality     | Genome-fragment | 4.38 | 0     |
| 513_vs_150977  full       | 2355  | No  | NA  | 0  | 0              | Not-determined  | Genome-fragment | NA   | 0     |
| 513_vs_151150  full       | 1841  | No  | NA  | 0  | 2              | Not-determined  | Genome-fragment | NA   | 0     |
| 513_vs_151217  full       | 1415  | No  | NA  | 0  | 0              | Not-determined  | Genome-fragment | NA   | 0     |
| 51_extracted_k141_33147   | 1299  | No  | NA  | 0  | 0              | Low-quality     | Genome-fragment | 0.83 | 0     |
| 513_vs_151601  full       | 2576  | No  | NA  | 0  | 0              | Not-determined  | Genome-fragment | NA   | 0     |
| 55_extracted_k141_139114  | 1299  | No  | NA  | 2  | 0              | Low-quality     | Genome-fragment | 3    | 0     |
| 513_vs_152214  full       | 1370  | No  | NA  | 0  | 2              | Not-determined  | Genome-fragment | NA   | 0     |
| 513_vs_152223  full       | 60897 | No  | NA  | 33 | 0              | High-quality    | High-quality    | 100  | 0     |
| 513_vs_152287  full       | 2421  | No  | NA  | 0  | 3              | Not-determined  | Genome-fragment | NA   | 0     |
| 513_vs_152454  full       | 3507  | No  | NA  | 0  | 0              | Not-determined  | Genome-fragment | NA   | 0     |
| 513_vs_152436  full       | 1509  | No  | NA  | 0  | 2              | Not-determined  | Genome-fragment | NA   | 0     |
| 513_vs_152697  full       | 1946  | No  | NA  | 0  | 1              | Not-determined  | Genome-fragment | NA   | 0     |
| 513_vs_152718  full       | 1459  | No  | NA  | 0  | 0              | Not-determined  | Genome-fragment | NA   | 0     |
| 513_vs_152750  full       | 6387  | No  | NA  | 0  | 4              | Not-determined  | Genome-fragment | NA   | 0     |
| 57_vs_100659  full        | 1299  | No  | NA  | 3  | 0              | Low-quality     | Genome-fragment | 2.95 | 0     |
| 57_vs_119853  full        | 1299  | No  | NA  | 1  | 0              | Low-quality     | Genome-fragment | 2.81 | 0     |
| 516_vs_15817  full        | 1299  | No  | NA  | 0  | 0              | Low-quality     | Genome-fragment | 0.81 | 0     |
| 513_vs_153321  full       | 2323  | No  | NA  | 0  | 2              | Not-determined  | Genome-fragment | NA   | 0     |
| 513_vs_153332  full       | 2938  | No  | NA  | 0  | 1              | Not-determined  | Genome-fragment | NA   | 0     |
| 513_vs_153584  full       | 5104  | No  | NA  | 0  | 5              | Not-determined  | Genome-fragment | NA   | 0     |
| 510_vs_100998  full       | 1299  | No  | NA  | 0  | 0              | Low-quality     | Genome-fragment | 1.39 | 0     |
| 513_vs_153906  full       | 1972  | No  | NA  | 0  | 2              | Not-determined  | Genome-fragment | NA   | 0     |
| 513_vs_153952  full       | 3090  | No  | NA  | 0  | 2              | Not-determined  | Genome-fragment | NA   | 0     |
| 513_vs_154019  full       | 1741  | No  | NA  | 0  | 2              | Not-determined  | Genome-fragment | NA   | 0     |
| 58_extracted_k141_97465   | 1299  | No  | NA  | 0  | 0              | Low-quality     | Genome-fragment | 1.39 | 0     |
| 513_vs_154229  full       | 1227  | No  | NA  | 0  | 0              | Not-determined  | Genome-fragment | NA   | 0     |
| 58_extracted_k141_136187  | 1299  | No  | NA  | 0  | 1              | Low-quality     | Genome-fragment | 1.99 | 0     |
| 513_vs_22523  O_partial   | 12564 | No  | NA  | 0  | 4              | Not-determined  | Genome-fragment | NA   | 0     |
| 58_extracted_k141_164548  | 1299  | No  | NA  | 1  | 0              | Low-quality     | Genome-fragment | 0.89 | 0     |
| 58_vs_k141_169169  full   | 1299  | No  | NA  | 2  | 0              | Low-quality     | Genome-fragment | 3.39 | 0     |
| 514_vs_k141_17462  H2gene | 1300  | No  | NA  | 0  | 0              | Low-quality     | Genome-fragment | 2.45 | 0     |
| 51_extracted_k141_140219  | 1300  | No  | NA  | 2  | 0              | Low-quality     | Genome-fragment | 2.93 | 0     |
| 51_extracted_k141_116946  | 1300  | No  | NA  | 1  | 0              | Low-quality     | Genome-fragment | 3.03 | 0     |
| 53_extracted_k141_27320   | 1300  | No  | NA  | 0  | 0              | Low-quality     | Genome-fragment | 4.27 | 0     |
| 513_vs_123344  O_partial  | 11899 | No  | NA  | 0  | 9              | Not-determined  | Genome-fragment | NA   | 0     |
| 55_vs_k141_13705  full    | 1300  | No  | NA  | 0  | 0              | Low-quality     | Genome-fragment | 0.73 | 0     |
| 516_vs_151807  full       | 1300  | No  | NA  | 0  | 0              | Low-quality     | Genome-fragment | 0.75 | 0     |
| 513_vs_149741  O_partial  | 14767 | No  | NA  | 0  | 5              | Not-determined  | Genome-fragment | NA   | 0     |
| 516_vs_141221  H2gene     | 1300  | No  | NA  | 1  | 0              | Low-quality     | Genome-fragment | 2.18 | 0     |
| 515_vs_17827  full        | 1300  | No  | NA  | 0  | 0              | Low-quality     | Genome-fragment | 0.8  | 0     |
| 58_vs_k141_46527  full    | 1300  | No  | NA  | 0  | 0              | Low-quality     | Genome-fragment | 2.96 | 0     |
| 513_vs_11769  H2gene      | 1002  | No  | NA  | 0  | 0              | Not-determined  | Genome-fragment | NA   | 0     |
| 59_extracted_k141_54530   | 1301  | No  | NA  | 0  | 3              | Low-quality     | Genome-fragment | 1.11 | 0     |
| 513_vs_50525  H2gene      | 1301  | No  | NA  | 0  | 0              | Low-quality     | Genome-fragment | 5.68 | 0     |
| 513_vs_21278  H2gene      | 1071  | No  | NA  | 0  | 0              | Not-determined  | Genome-fragment | NA   | 0     |
| 53_extracted_k141_59911   | 1301  | No  | NA  | 1  | 0              | Low-quality     | Genome-fragment | 0.66 | 0     |
| 55_vs_k141_16782  H2gene  | 1301  | No  | NA  | 0  | 1              | Low-quality     | Genome-fragment | 2.13 | 0     |
| 57_extracted_43073        | 1301  | No  | NA  | 1  | 0              | Low-quality     | Genome-fragment | 4.42 | 0     |
| 513_vs_31411  H2gene      | 2111  | No  | NA  | 0  | 0              | Not-determined  | Genome-fragment | NA   | 0     |
| 516_vs_17638  full        | 1301  | No  | NA  | 0  | 0              | Low-quality     | Genome-fragment | 2.36 | 0     |
| 512_vs_k141_107193  full  | 1301  | No  | NA  | 2  | 0              | Low-quality     | Genome-fragment | 3.71 | 0     |
| 513_vs_36246  H2gene      | 1475  | No  | NA  | 0  | 0              | Not-determined  | Genome-fragment | NA   | 0     |
| 513_vs_48407  H2gene      | 1067  | No  | NA  | 0  | 1              | Not-determined  | Genome-fragment | NA   | 0     |
| 513_vs_49885  H2gene      | 1211  | No  | NA  | 0  | 0              | Not-determined  | Genome-fragment | NA   | 0     |
| 515_extracted_17672       | 1301  | No  | NA  | 0  | 2              | Low-quality     | Genome-fragment | 1.6  | 0     |
| 515_extracted_25053       | 1301  | No  | NA  | 0  | 0              | Low-quality     | Genome-fragment | 1.62 | 0     |
| 513_vs_57461  H2gene      | 1208  | No  | NA  | 0  | 0              | Not-determined  | Genome-fragment | NA   | 0     |
| 513_vs_59104  H2gene      | 1504  | No  | NA  | 0  | 0              | Not-determined  | Genome-fragment | NA   | 0     |
| 513_vs_60714  H2gene      | 1303  | No  | NA  | 0  | 0              | Not-determined  | Genome-fragment | NA   | 0     |
| 513_vs_64050  H2gene      | 2430  | No  | NA  | 0  | 0              | Not-determined  | Genome-fragment | NA   | 0     |
| 513_vs_64338  H2gene      | 1013  | No  | NA  | 0  | 0              | Not-determined  | Genome-fragment | NA   | 0     |
| 515_vs_21198  full        | 1901  | No  | NA  | 0  | 1              | Low-quality     | Genome-fragment | 3    | 0     |
| 513_vs_71256  H2gene      | 1958  | No  | NA  | 0  | 0              | Not-determined  | Genome-fragment | NA   | 0     |
| 56_vs_k141_46151  full    | 1301  | No  | NA  | 0  | 0              | Low-quality     | Genome-fragment | 4.06 | 0     |
| 58_vs_k141_105795  full   | 1301  | No  | NA  | 0  | 0              | Low-quality     | Genome-fragment | 2.02 | 0     |
| 58_vs_k141_40743  full    | 1301  | No  | NA  | 1  | 0              | Low-quality     | Genome-fragment | 1.63 | 0     |
| 513_vs_54682  H2gene      | 1120  | No  | NA  | 0  | 0              | Not-determined  |                 |      |       |



|                            |       |     |    |   |                |                 |       |       |
|----------------------------|-------|-----|----|---|----------------|-----------------|-------|-------|
| S14_extracted_k141_36795   | 1039  | NA  | 0  | 0 | Not-determined | Genome-fragment | NA    | 0     |
| S7_vs_28972  full          | 1304  | NA  | 0  | 0 | Low-quality    | Genome-fragment | 3.06  | 0     |
| S7_vs_31206  full          | 1304  | NA  | 1  | 0 | Low-quality    | Genome-fragment | 2.93  | 0     |
| S7_vs_74001  full          | 1304  | NA  | 1  | 0 | Low-quality    | Genome-fragment | 1.57  | 0     |
| S12_vs_k141_17957  full    | 1304  | Yes | 1  | 1 | Low-quality    | Genome-fragment | 0.96  | 68.25 |
| S14_extracted_k141_102890  | 1069  | NA  | 0  | 0 | Not-determined | Genome-fragment | NA    | 0     |
| S15_extracted_44290        | 1304  | NA  | 1  | 0 | Low-quality    | Genome-fragment | 1.37  | 0     |
| S14_extracted_k141_44139   | 1329  | NA  | 0  | 1 | Not-determined | Genome-fragment | NA    | 0     |
| S14_extracted_k141_145     | 2056  | NA  | 0  | 0 | Not-determined | Genome-fragment | NA    | 0     |
| S15_extracted_45304        | 1304  | NA  | 0  | 1 | Low-quality    | Genome-fragment | 1.47  | 0     |
| S8_extracted_k141_196969   | 1304  | NA  | 0  | 1 | Low-quality    | Genome-fragment | 0.81  | 0     |
| S5_vs_k141_50867  lit2gme  | 1304  | NA  | 0  | 0 | Low-quality    | Genome-fragment | 1.91  | 0     |
| S14_extracted_k141_22148   | 3080  | NA  | 0  | 1 | Not-determined | Genome-fragment | NA    | 0     |
| S14_extracted_k141_110024  | 1225  | NA  | 0  | 2 | Not-determined | Genome-fragment | NA    | 0     |
| S14_extracted_k141_51465   | 1863  | NA  | 0  | 2 | Not-determined | Genome-fragment | NA    | 0     |
| S17_extracted_k141_102259  | 1305  | NA  | 0  | 0 | Low-quality    | Genome-fragment | 1.96  | 0     |
| S17_vs_k141_137101  full   | 1305  | NA  | 0  | 0 | Low-quality    | Genome-fragment | 2.44  | 0     |
| S9_vs_k141_2425  full      | 1305  | NA  | 0  | 0 | Low-quality    | Genome-fragment | 1.59  | 0     |
| S14_extracted_k141_7526    | 3042  | NA  | 0  | 0 | Not-determined | Genome-fragment | NA    | 0     |
| S14_extracted_k141_14815   | 5011  | NA  | 0  | 2 | Not-determined | Genome-fragment | NA    | 0     |
| S14_extracted_k141_29530   | 7915  | NA  | 0  | 4 | Not-determined | Genome-fragment | NA    | 0     |
| S14_extracted_k141_95430   | 1128  | NA  | 0  | 1 | Not-determined | Genome-fragment | NA    | 0     |
| S13_vs_14802  full         | 1305  | NA  | 0  | 1 | Low-quality    | Genome-fragment | 1.33  | 0     |
| S14_extracted_k141_26228   | 1305  | NA  | 4  | 0 | Low-quality    | Genome-fragment | 4.3   | 0     |
| S14_extracted_k141_36905   | 4052  | NA  | 0  | 2 | Not-determined | Genome-fragment | NA    | 0     |
| S14_extracted_k141_58879   | 1049  | NA  | 0  | 1 | Not-determined | Genome-fragment | NA    | 0     |
| S14_extracted_k141_49714   | 1305  | NA  | 2  | 0 | Low-quality    | Genome-fragment | 2.03  | 0     |
| S14_extracted_k141_29537   | 1021  | NA  | 0  | 1 | Not-determined | Genome-fragment | NA    | 0     |
| S14_extracted_k141_5155    | 1471  | NA  | 0  | 1 | Not-determined | Genome-fragment | NA    | 0     |
| S14_extracted_k141_7612    | 15544 | NA  | 0  | 9 | Not-determined | Genome-fragment | NA    | 0     |
| S3_extracted_k141_120184   | 1305  | NA  | 0  | 1 | Low-quality    | Genome-fragment | 2.61  | 0     |
| S14_extracted_k141_29569   | 1239  | NA  | 0  | 1 | Low-quality    | Genome-fragment | NA    | 0     |
| S5_vs_k141_22359  full     | 1305  | NA  | 0  | 1 | Low-quality    | Genome-fragment | 1.43  | 0     |
| S14_extracted_k141_95520   | 4407  | NA  | 0  | 1 | Not-determined | Genome-fragment | NA    | 0     |
| S5_vs_k141_103035  full    | 1305  | NA  | 0  | 0 | Low-quality    | Genome-fragment | 1.9   | 0     |
| S14_extracted_k141_102768  | 1621  | NA  | 0  | 1 | Not-determined | Genome-fragment | NA    | 0     |
| S14_extracted_k141_58919   | 36704 | NA  | 17 | 0 | High-quality   | High-quality    | 100   | 0     |
| S14_extracted_k141_359     | 3192  | NA  | 0  | 3 | Not-determined | Genome-fragment | NA    | 0     |
| S14_extracted_k141_22259   | 1723  | NA  | 0  | 0 | Not-determined | Genome-fragment | NA    | 0     |
| S5_vs_k141_135674  lit2gme | 1305  | NA  | 0  | 1 | Low-quality    | Genome-fragment | 2.51  | 0     |
| S7_extracted_25897         | 1305  | NA  | 2  | 0 | Low-quality    | Genome-fragment | 4.53  | 0     |
| S7_extracted_114900        | 1305  | NA  | 0  | 0 | Low-quality    | Genome-fragment | 2.36  | 0     |
| S6_vs_k141_46149  full     | 1305  | NA  | 2  | 0 | Low-quality    | Genome-fragment | 0.99  | 0     |
| S8_extracted_k141_95775    | 1305  | NA  | 1  | 0 | Low-quality    | Genome-fragment | 2.01  | 0     |
| S11_extracted_k141_59769   | 1306  | NA  | 1  | 0 | Low-quality    | Genome-fragment | 3.21  | 0     |
| S11_vs_k141_6594  full     | 1306  | NA  | 0  | 0 | Low-quality    | Genome-fragment | 1.23  | 0     |
| S1_vs_k141_132692  full    | 1306  | NA  | 0  | 0 | Low-quality    | Genome-fragment | 3.32  | 0     |
| S14_extracted_k141_66179   | 1577  | NA  | 0  | 1 | Not-determined | Genome-fragment | NA    | 0     |
| S14_extracted_k141_59002   | 3793  | NA  | 0  | 0 | Not-determined | Genome-fragment | NA    | 0     |
| S1_vs_k141_125994  full    | 1306  | NA  | 0  | 1 | Low-quality    | Genome-fragment | 2.43  | 0     |
| S3_vs_k141_55947  lit2gme  | 1306  | NA  | 1  | 0 | Low-quality    | Genome-fragment | 2.37  | 0     |
| S5_extracted_k141_47500    | 1306  | NA  | 0  | 0 | Low-quality    | Genome-fragment | 2.67  | 0     |
| S14_extracted_k141_95598   | 1663  | NA  | 0  | 2 | Not-determined | Genome-fragment | NA    | 0     |
| S5_vs_k141_98396  full     | 1306  | NA  | 0  | 1 | Low-quality    | Genome-fragment | 2.26  | 0     |
| S14_extracted_k141_86250   | 1009  | NA  | 0  | 1 | Not-determined | Genome-fragment | NA    | 0     |
| S14_extracted_k141_102882  | 2026  | NA  | 0  | 0 | Not-determined | Genome-fragment | NA    | 0     |
| S14_extracted_k141_59018   | 1377  | NA  | 0  | 1 | Not-determined | Genome-fragment | NA    | 0     |
| S14_extracted_k141_14989   | 1515  | NA  | 0  | 2 | Not-determined | Genome-fragment | NA    | 0     |
| S14_extracted_k141_80935   | 2413  | NA  | 0  | 2 | Not-determined | Genome-fragment | NA    | 0     |
| S14_extracted_k141_88269   | 1016  | NA  | 0  | 0 | Not-determined | Genome-fragment | NA    | 0     |
| S14_extracted_k141_110231  | 1177  | NA  | 0  | 0 | Not-determined | Genome-fragment | NA    | 0     |
| S7_extracted_20297         | 1306  | NA  | 0  | 1 | Low-quality    | Genome-fragment | 0.56  | 0     |
| S14_extracted_k141_88291   | 1037  | NA  | 0  | 1 | Not-determined | Genome-fragment | NA    | 0     |
| S14_extracted_k141_44255   | 1392  | NA  | 0  | 0 | Not-determined | Genome-fragment | NA    | 0     |
| S14_extracted_k141_44263   | 1174  | NA  | 0  | 0 | Not-determined | Genome-fragment | NA    | 0     |
| S7_vs_8860  full           | 1306  | NA  | 0  | 1 | Low-quality    | Genome-fragment | 0.96  | 0     |
| S14_extracted_k141_545     | 1074  | NA  | 0  | 0 | Not-determined | Genome-fragment | NA    | 0     |
| S14_extracted_k141_59081   | 1552  | NA  | 0  | 2 | Not-determined | Genome-fragment | NA    | 0     |
| S10_vs_77029  full         | 1306  | NA  | 0  | 0 | Low-quality    | Genome-fragment | 2.43  | 0     |
| S12_extracted_k141_161737  | 1306  | NA  | 0  | 1 | Low-quality    | Genome-fragment | 3.07  | 0     |
| S14_extracted_k141_59083   | 5551  | NA  | 0  | 5 | Not-determined | Genome-fragment | NA    | 0     |
| S14_extracted_k141_102954  | 4906  | NA  | 0  | 1 | Not-determined | Genome-fragment | NA    | 0     |
| S12_vs_k141_170049  full   | 1306  | NA  | 0  | 0 | Low-quality    | Genome-fragment | 2.2   | 0     |
| S9_extracted_k141_13138    | 1307  | NA  | 1  | 0 | Low-quality    | Genome-fragment | 2.63  | 0     |
| S3_vs_k141_1497  full      | 1307  | NA  | 0  | 0 | Low-quality    | Genome-fragment | 1.65  | 0     |
| S14_extracted_k141_102984  | 1263  | NA  | 0  | 1 | Not-determined | Genome-fragment | NA    | 0     |
| S14_extracted_k141_612     | 2510  | NA  | 0  | 7 | Not-determined | Genome-fragment | NA    | 0     |
| S5_vs_k141_136056  full    | 1307  | NA  | 0  | 1 | Low-quality    | Genome-fragment | 1.78  | 0     |
| S14_extracted_k141_73540   | 1278  | NA  | 0  | 0 | Not-determined | Genome-fragment | NA    | 0     |
| S5_vs_k141_21625  full     | 1307  | NA  | 0  | 0 | Low-quality    | Genome-fragment | 2.35  | 0     |
| S14_extracted_k141_44343   | 3324  | NA  | 0  | 6 | Not-determined | Genome-fragment | NA    | 0     |
| S5_vs_k141_12886  full     | 1307  | NA  | 0  | 0 | Low-quality    | Genome-fragment | 3.18  | 0     |
| S5_vs_k141_71528  full     | 1307  | NA  | 1  | 0 | Low-quality    | Genome-fragment | 2.39  | 0     |
| S14_extracted_k141_110287  | 1312  | NA  | 0  | 2 | Not-determined | Genome-fragment | NA    | 0     |
| S14_extracted_k141_15074   | 1069  | NA  | 0  | 0 | Not-determined | Genome-fragment | NA    | 0     |
| S7_vs_44914  full          | 1307  | NA  | 1  | 0 | Low-quality    | Genome-fragment | 2.08  | 0     |
| S14_extracted_k141_103085  | 3143  | NA  | 0  | 0 | Not-determined | Genome-fragment | NA    | 0     |
| S12_vs_k141_99388  full    | 1307  | NA  | 0  | 0 | Low-quality    | Genome-fragment | 0.95  | 0     |
| S6_vs_k141_18819  full     | 1307  | NA  | 0  | 0 | Low-quality    | Genome-fragment | 3.69  | 0     |
| S14_extracted_k141_44364   | 1323  | NA  | 0  | 0 | Not-determined | Genome-fragment | NA    | 0     |
| S8_vs_k141_18419  full     | 1307  | NA  | 0  | 0 | Low-quality    | Genome-fragment | 2.07  | 0     |
| S8_vs_k141_124229  full    | 1307  | NA  | 0  | 0 | Low-quality    | Genome-fragment | 2.08  | 0     |
| S17_vs_k141_108507  full   | 1308  | NA  | 0  | 1 | Low-quality    | Genome-fragment | 0.94  | 0     |
| S14_extracted_k141_27228   | 2297  | NA  | 0  | 0 | Not-determined | Genome-fragment | NA    | 0     |
| S14_extracted_k141_23298   | 3993  | NA  | 0  | 0 | Not-determined | Genome-fragment | NA    | 0     |
| S14_extracted_k141_95844   | 2922  | NA  | 0  | 2 | Not-determined | Genome-fragment | NA    | 0     |
| S17_vs_k141_28907  full    | 1308  | NA  | 0  | 0 | Low-quality    | Genome-fragment | 3.79  | 0     |
| S14_extracted_k141_22405   | 1612  | NA  | 0  | 0 | Not-determined | Genome-fragment | NA    | 0     |
| S11_vs_k141_104103  full   | 1308  | NA  | 0  | 0 | Low-quality    | Genome-fragment | 0.43  | 0     |
| S3_vs_k141_95167  full     | 1308  | NA  | 0  | 0 | Low-quality    | Genome-fragment | 2.92  | 0     |
| S14_extracted_k141_27243   | 4105  | NA  | 0  | 4 | Not-determined | Genome-fragment | NA    | 0     |
| S14_extracted_k141_44388   | 1995  | NA  | 0  | 0 | Not-determined | Genome-fragment | NA    | 0     |
| S14_extracted_k141_29876   | 2183  | NA  | 0  | 2 | Not-determined | Genome-fragment | NA    | 0     |
| S7_vs_21781  full          | 1308  | NA  | 1  | 0 | Low-quality    | Genome-fragment | 3.35  | 0     |
| S16_extracted_163112       | 1308  | NA  | 0  | 0 | Low-quality    | Genome-fragment | 2     | 0     |
| S10_vs_51888  full         | 1308  | NA  | 0  | 0 | Low-quality    | Genome-fragment | 1.04  | 0     |
| S14_extracted_k141_81128   | 1249  | NA  | 0  | 1 | Not-determined | Genome-fragment | NA    | 0     |
| S14_extracted_k141_59871   | 1075  | NA  | 0  | 1 | Not-determined | Genome-fragment | NA    | 0     |
| S12_vs_k141_55696  full    | 1308  | NA  | 0  | 0 | Low-quality    | Genome-fragment | 2.12  | 0     |
| S14_extracted_k141_73643   | 3685  | NA  | 0  | 0 | Not-determined | Genome-fragment | NA    | 0     |
| S14_extracted_k141_38499   | 5417  | NA  | 0  | 6 | Not-determined | Genome-fragment | NA    | 0     |
| S12_vs_k141_82084  full    | 1308  | NA  | 0  | 0 | Low-quality    | Genome-fragment | 1.11  | 0     |
| S14_extracted_k141_103154  | 5450  | NA  | 0  | 0 | Not-determined | Genome-fragment | NA    | 0     |
| S12_vs_k141_60776  full    | 1308  | NA  | 0  | 0 | Low-quality    | Genome-fragment | 1.18  | 0     |
| S12_vs_k141_27196  full    | 1308  | NA  | 0  | 0 | Low-quality    | Genome-fragment | 2.17  | 0     |
| S15_vs_1706  full          | 1308  | NA  | 1  | 0 | Low-quality    | Genome-fragment | 3.46  | 0     |
| S14_extracted_k141_7878    | 2152  | NA  | 0  | 1 | Not-determined | Genome-fragment | NA    | 0     |
| S8_extracted_k141_195952   | 1308  | NA  | 0  | 0 | Low-quality    | Genome-fragment | 3.13  | 0     |
| S14_extracted_k141_59270   | 1995  | NA  | 0  | 3 | Not-determined | Genome-fragment | NA    | 0     |
| S14_extracted_k141_59214   | 4267  | NA  | 0  | 3 | Not-determined | Genome-fragment | NA    | 0     |
| S14_extracted_k141_44452   | 31164 | NA  | 16 | 0 | High-quality   | High-quality    | 99.12 | 0     |
| S17_extracted_k141_138048  | 1309  | NA  | 0  | 0 | Low-quality    | Genome-fragment | NA    | 0     |
| S9_vs_k141_63617  full     | 1309  | NA  | 2  | 0 | Low-quality    | Genome-fragment | 1.93  | 0     |
| S3_vs_k141_40548  full     | 1309  | NA  | 0  | 3 | Low-quality    | Genome-fragment | 3.67  | 0     |
| S5_vs_k141_129684  full    | 1309  | NA  | 0  | 0 | Low-quality    | Genome-fragment | 1.26  | 0     |
| S14_extracted_k141_770     | 1252  | NA  | 0  | 1 | Not-determined | Genome-fragment | NA    | 0     |
| S16_extracted_142589       | 1309  | NA  | 1  | 0 | Low-quality    | Genome-fragment | 2.48  | 0     |
| S14_extracted_k141_110439  | 3250  | NA  | 0  | 1 | Not-determined | Genome-fragment | NA    | 0     |
| S14_extracted_k141_66399   | 5983  | NA  | 0  | 2 | Not-determined | Genome-fragment | NA    | 0     |
| S16_vs_115313  full        | 1309  | NA  | 0  | 0 | Low-quality    | Genome-fragment | 1.99  | 0     |
| S14_extracted_k141_51983   | 1918  | NA  | 0  | 3 | Not-determined | Genome-fragment | NA    | 0     |
| S12_extracted_k141_97987   | 1309  | NA  | 0  | 0 | Low-quality    | Genome-fragment | 1.66  | 0     |
| S12_vs_k141_120502  full   | 1309  | NA  | 0  | 1 | Low-quality    | Genome-fragment | 1.92  | 0     |
| S14_extracted_k141_110464  | 1891  | NA  | 0  | 2 | Not-determined | Genome-fragment | NA    | 0     |
| S14_extracted_k141_110468  | 1341  | NA  | 0  | 1 | Not-determined | Genome-fragment | NA    | 0     |
| S14_extracted_k141_59294   | 16909 | NA  | 0  | 4 | Not-determined | Genome-fragment | NA    | 0     |
| S12_vs_k141_149370  full   | 1309  | NA  | 0  | 0 | Low-quality    | Genome-fragment | 1.06  | 0     |
| S8_extracted_k141_167303   | 1309  | NA  | 1  | 0 | Low-quality    | Genome-fragment | 2.75  | 0     |
| S14_extracted_k141_52011   | 19473 | NA  | 0  | 7 | Not-determined | Genome-fragment | NA    | 0     |
| S8_extracted_k141_89444    | 1309  | NA  | 2  | 0 | Low-quality    | Genome-fragment | 1.78  | 0     |
| S8_extracted_k141_142212   | 1309  | NA  | 0  | 2 | Low-quality    | Genome-fragment | 0.87  | 0     |
| S14_extracted_k141_44513   | 1374  | NA  | 0  | 1 | Not-determined | Genome-fragment | NA    | 0     |
| S8_extracted_k141_121126   | 1309  | NA  | 0  | 0 | Low-quality    | Genome-fragment | 4.04  | 0     |
| S14_extracted_k141_22541   | 1272  | NA  | 0  | 1 | Not-determined | Genome-fragment | NA    | 0     |
| S14_extracted_k141_110013  | 4889  | NA  | 0  | 2 | Not-determined | Genome-fragment | NA    | 0     |
| S17_vs_k141_49114  full    | 1310  | NA  | 2  | 0 | Low-quality    | Genome-fragment | 3.06  | 0     |
| S14_extracted_k141_831     | 1268  | NA  | 0  | 1 | Not-determined | Genome-fragment | NA    | 0     |
| S14_extracted_k141_20031   | 3647  | NA  | 0  | 1 | Not-determined | Genome-fragment | NA    | 0     |
| S14_extracted_k141_52056   | 4360  | NA  | 0  | 1 | Not-determined | Genome-fragment | NA    | 0     |
| S14_extracted_k141_52114   | 4614  | NA  | 0  | 0 | Not-determined | Genome-fragment | NA    | 0     |
| S14_extracted_k141_37467   | 2627  | NA  | 0  | 2 | Not-determined | Genome-fragment | NA    | 0     |
| S14_extracted_k141_7803    | 3754  | NA  | 0  | 0 | Not-determined | Genome-fragment | NA    | 0     |
| S14_extracted_k141_30074   | 1478  | NA  | 0  | 0 | Not-determined | Genome-fragment | NA    | 0     |
| S9_vs_k1                   |       |     |    |   |                |                 |       |       |



|                             |       |    |    |   |                |                 |                 |      |   |
|-----------------------------|-------|----|----|---|----------------|-----------------|-----------------|------|---|
| S17_extracted_k141_19202    | 1311  | No | NA | 2 | 0              | Low-quality     | Genome-fragment | 4.16 | 0 |
| S17_vs_k141_58513  full     | 1311  | No | NA | 1 | Low-quality    | Genome-fragment | NA              | 1.14 | 0 |
| S11_vs_k141_10661  full     | 1311  | No | NA | 0 | 1              | Low-quality     | Genome-fragment | 0.83 | 0 |
| S14_extracted_k141_52297    | 1474  | No | NA | 0 | 0              | Not-determined  | Genome-fragment | NA   | 0 |
| S13_extracted_28634         | 1311  | No | NA | 2 | 0              | Low-quality     | Genome-fragment | 2.49 | 0 |
| S14_extracted_k141_568      | 7070  | No | NA | 0 | 2              | Not-determined  | Genome-fragment | NA   | 0 |
| S14_extracted_k141_53794    | 1311  | No | NA | 3 | 0              | Low-quality     | Genome-fragment | 4.33 | 0 |
| S3_extracted_k141_92703     | 1311  | No | NA | 0 | 1              | Low-quality     | Genome-fragment | 0.34 | 0 |
| S16_vs_115322  full         | 1311  | No | NA | 0 | 0              | Low-quality     | Genome-fragment | 1.83 | 0 |
| S14_extracted_k141_59503    | 3918  | No | NA | 0 | 0              | Not-determined  | Genome-fragment | NA   | 0 |
| S12_extracted_k141_33500    | 1311  | No | NA | 0 | 0              | Low-quality     | Genome-fragment | 3.05 | 0 |
| S14_extracted_k141_21085    | 1395  | No | NA | 0 | 0              | Not-determined  | Genome-fragment | NA   | 0 |
| S14_extracted_k141_44726    | 2309  | No | NA | 0 | 0              | Not-determined  | Genome-fragment | NA   | 0 |
| S15_vs_50440  full          | 1311  | No | NA | 0 | 0              | Low-quality     | Genome-fragment | 0.89 | 0 |
| S8_vs_k141_3951  full       | 1311  | No | NA | 0 | 0              | Low-quality     | Genome-fragment | 0.4  | 0 |
| S14_extracted_k141_110722   | 5514  | No | NA | 2 | Not-determined | Genome-fragment | NA              | 0    | 0 |
| S14_extracted_k141_74063    | 1125  | No | NA | 0 | 0              | Not-determined  | Genome-fragment | NA   | 0 |
| S14_extracted_k141_103457   | 1499  | No | NA | 0 | 1              | Not-determined  | Genome-fragment | NA   | 0 |
| S14_vs_k141_88892  full     | 1312  | No | NA | 0 | 0              | Low-quality     | Genome-fragment | 4.33 | 0 |
| S14_extracted_k141_95984    | 1300  | No | NA | 0 | 0              | Not-determined  | Genome-fragment | NA   | 0 |
| S1_extracted_k141_67911     | 1312  | No | NA | 0 | 1              | Low-quality     | Genome-fragment | 2.57 | 0 |
| S3_vs_k141_99797  full      | 1312  | No | NA | 0 | 0              | Low-quality     | Genome-fragment | 2.81 | 0 |
| S14_extracted_k141_88879    | 3493  | No | NA | 0 | 2              | Not-determined  | Genome-fragment | NA   | 0 |
| S14_extracted_k141_30256    | 1004  | No | NA | 0 | 0              | Not-determined  | Genome-fragment | NA   | 0 |
| S16_extracted_72925         | 1312  | No | NA | 0 | 0              | Low-quality     | Genome-fragment | 2.23 | 0 |
| S14_extracted_k141_14777    | 1144  | No | NA | 0 | 0              | Not-determined  | Genome-fragment | NA   | 0 |
| S16_vs_4218  full           | 1312  | No | NA | 0 | 0              | Low-quality     | Genome-fragment | 1.01 | 0 |
| S10_extracted_47430         | 1312  | No | NA | 1 | 0              | Low-quality     | Genome-fragment | 3.06 | 0 |
| S14_extracted_k141_110756   | 3692  | No | NA | 2 | Not-determined | Genome-fragment | NA              | 0    | 0 |
| S10_extracted_82493         | 1312  | No | NA | 0 | 0              | Low-quality     | Genome-fragment | 1.88 | 0 |
| S12_extracted_k141_163068   | 1312  | No | NA | 0 | 1              | Low-quality     | Genome-fragment | 3.35 | 0 |
| S12_vs_k141_126376  full    | 1312  | No | NA | 0 | 0              | Low-quality     | Genome-fragment | 2.02 | 0 |
| S12_vs_k141_142138  full    | 1312  | No | NA | 0 | 0              | Low-quality     | Genome-fragment | 3.27 | 0 |
| S4_extracted_6192           | 1312  | No | NA | 3 | 0              | Low-quality     | Genome-fragment | 4.26 | 0 |
| S14_extracted_k141_44805    | 1097  | No | NA | 0 | 0              | Not-determined  | Genome-fragment | NA   | 0 |
| S14_extracted_k141_66584    | 3214  | No | NA | 0 | 0              | Not-determined  | Genome-fragment | NA   | 0 |
| S14_extracted_k141_110832   | 8404  | No | NA | 0 | 4              | Not-determined  | Genome-fragment | NA   | 0 |
| S14_extracted_k141_103602   | 1185  | No | NA | 0 | 0              | Not-determined  | Genome-fragment | NA   | 0 |
| S6_vs_k141_12332  full      | 1312  | No | NA | 0 | 0              | Low-quality     | Genome-fragment | 0.93 | 0 |
| S8_vs_k141_33139  H2genome  | 1312  | No | NA | 1 | 0              | Low-quality     | Genome-fragment | 2.8  | 0 |
| S17_extracted_k141_171820   | 1313  | No | NA | 0 | 0              | Low-quality     | Genome-fragment | 2.31 | 0 |
| S1_extracted_k141_138870    | 1313  | No | NA | 0 | 0              | Low-quality     | Genome-fragment | 2.02 | 0 |
| S14_extracted_k141_96087    | 2968  | No | NA | 0 | 1              | Not-determined  | Genome-fragment | NA   | 0 |
| S1_vs_k141_119558  full     | 1313  | No | NA | 0 | 0              | Low-quality     | Genome-fragment | 1.7  | 0 |
| S1_vs_k141_122730  full     | 1313  | No | NA | 0 | 5              | Low-quality     | Genome-fragment | 0.39 | 0 |
| S14_extracted_k141_1147     | 5130  | No | NA | 0 | 1              | Not-determined  | Genome-fragment | NA   | 0 |
| S14_extracted_k141_103671   | 1030  | No | NA | 0 | 0              | Not-determined  | Genome-fragment | NA   | 0 |
| S5_extracted_k141_101653    | 1313  | No | NA | 2 | 0              | Low-quality     | Genome-fragment | 2.24 | 0 |
| S5_vs_k141_17043  full      | 1313  | No | NA | 0 | 0              | Low-quality     | Genome-fragment | 3.49 | 0 |
| S14_extracted_k141_89006    | 4108  | No | NA | 0 | 2              | Not-determined  | Genome-fragment | NA   | 0 |
| S5_vs_k141_43343  H2genome  | 1313  | No | NA | 1 | 0              | Low-quality     | Genome-fragment | 1.92 | 0 |
| S7_extracted_85081          | 1313  | No | NA | 0 | 0              | Low-quality     | Genome-fragment | 2.47 | 0 |
| S14_extracted_k141_96112    | 1032  | No | NA | 0 | 0              | Not-determined  | Genome-fragment | NA   | 0 |
| S7_vs_34954  full           | 1313  | No | NA | 2 | 0              | Low-quality     | Genome-fragment | 0.76 | 0 |
| S7_vs_11777  full           | 1313  | No | NA | 0 | 0              | Low-quality     | Genome-fragment | 3.09 | 0 |
| S14_extracted_k141_22844    | 4594  | No | NA | 0 | 2              | Not-determined  | Genome-fragment | NA   | 0 |
| S17_vs_130315  full         | 1313  | No | NA | 0 | 0              | Low-quality     | Genome-fragment | 0.89 | 0 |
| S10_vs_114248  full         | 1313  | No | NA | 0 | 0              | Low-quality     | Genome-fragment | 1.43 | 0 |
| S12_vs_k141_16011  full     | 1313  | No | NA | 0 | 0              | Low-quality     | Genome-fragment | 1.52 | 0 |
| S14_extracted_k141_95969    | 3882  | No | NA | 0 | 1              | Not-determined  | Genome-fragment | NA   | 0 |
| S12_extracted_k141_5288     | 1313  | No | NA | 1 | 0              | Low-quality     | Genome-fragment | 3.29 | 0 |
| S6_vs_k141_12807  full      | 1313  | No | NA | 0 | 0              | Low-quality     | Genome-fragment | NA   | 0 |
| S14_extracted_k141_1223     | 1010  | No | NA | 0 | 0              | Not-determined  | Genome-fragment | NA   | 0 |
| S14_extracted_k141_44932    | 2774  | No | NA | 0 | 2              | Not-determined  | Genome-fragment | NA   | 0 |
| S8_vs_k141_152270  full     | 1313  | No | NA | 0 | 0              | Low-quality     | Genome-fragment | 3.36 | 0 |
| S13_vs_84613  full          | 1314  | No | NA | 0 | 0              | Low-quality     | Genome-fragment | 1.74 | 0 |
| S14_vs_k141_90494  full     | 1314  | No | NA | 1 | 0              | Low-quality     | Genome-fragment | 3.55 | 0 |
| S3_extracted_k141_50768     | 1314  | No | NA | 2 | 0              | Low-quality     | Genome-fragment | 3.26 | 0 |
| S3_vs_k141_97692  full      | 1314  | No | NA | 0 | 0              | Low-quality     | Genome-fragment | NA   | 0 |
| S5_vs_k141_139041  full     | 1314  | No | NA | 0 | 0              | Low-quality     | Genome-fragment | 3.6  | 0 |
| S14_extracted_k141_15803    | 1113  | No | NA | 0 | 1              | Not-determined  | Genome-fragment | NA   | 0 |
| S14_extracted_k141_66689    | 1322  | No | NA | 0 | 0              | Not-determined  | Genome-fragment | NA   | 0 |
| S5_vs_k141_37093  H2genome  | 1314  | No | NA | 2 | 0              | Low-quality     | Genome-fragment | 3.44 | 0 |
| S16_vs_119293  full         | 1314  | No | NA | 0 | 1              | Low-quality     | Genome-fragment | 1.39 | 0 |
| S14_extracted_k141_20537    | 6067  | No | NA | 0 | 1              | Not-determined  | Genome-fragment | NA   | 0 |
| S14_extracted_k141_74213    | 1021  | No | NA | 0 | 0              | Not-determined  | Genome-fragment | NA   | 0 |
| S14_extracted_k141_89129    | 5241  | No | NA | 0 | 5              | Not-determined  | Genome-fragment | NA   | 0 |
| S15_extracted_54875         | 1314  | No | NA | 1 | 0              | Low-quality     | Genome-fragment | 2.91 | 0 |
| S15_vs_12341  full          | 1314  | No | NA | 0 | 0              | Low-quality     | Genome-fragment | NA   | 0 |
| S2_extracted_k141_12410     | 1314  | No | NA | 0 | 0              | Low-quality     | Genome-fragment | 1.37 | 0 |
| S14_extracted_k141_61646    | 2214  | No | NA | 0 | 1              | Not-determined  | Genome-fragment | NA   | 0 |
| S14_extracted_k141_66702    | 2616  | No | NA | 0 | 0              | Not-determined  | Genome-fragment | NA   | 0 |
| S8_vs_k141_182519  H2genome | 1314  | No | NA | 1 | 0              | Low-quality     | Genome-fragment | 2.29 | 0 |
| S14_extracted_k141_66713    | 1093  | No | NA | 0 | 0              | Not-determined  | Genome-fragment | NA   | 0 |
| S14_extracted_k141_8436     | 2771  | No | NA | 0 | 0              | Not-determined  | Genome-fragment | NA   | 0 |
| S14_extracted_k141_74225    | 3044  | No | NA | 0 | 4              | Not-determined  | Genome-fragment | NA   | 0 |
| S14_extracted_k141_81680    | 1352  | No | NA | 0 | 2              | Not-determined  | Genome-fragment | NA   | 0 |
| S8_vs_k141_5131  H2genome   | 1314  | No | NA | 1 | 0              | Low-quality     | Genome-fragment | 0.51 | 0 |
| S17_extracted_k141_61884    | 1315  | No | NA | 0 | 0              | Low-quality     | Genome-fragment | 6    | 0 |
| S14_extracted_k141_89176    | 1130  | No | NA | 0 | 0              | Not-determined  | Genome-fragment | NA   | 0 |
| S14_extracted_k141_12988    | 1262  | No | NA | 0 | 1              | Not-determined  | Genome-fragment | NA   | 0 |
| S14_extracted_k141_74270    | 1002  | No | NA | 0 | 0              | Not-determined  | Genome-fragment | NA   | 0 |
| S9_vs_k141_82145  H2genome  | 1315  | No | NA | 1 | 0              | Low-quality     | Genome-fragment | 1.85 | 0 |
| S11_extracted_k141_55613    | 1315  | No | NA | 0 | 0              | Low-quality     | Genome-fragment | 2.77 | 0 |
| S14_extracted_k141_51729    | 4095  | No | NA | 0 | 2              | Not-determined  | Genome-fragment | NA   | 0 |
| S14_vs_k141_99593  full     | 1315  | No | NA | 2 | 0              | Low-quality     | Genome-fragment | 2.82 | 0 |
| S14_vs_k141_79868  full     | 1315  | No | NA | 2 | 0              | Low-quality     | Genome-fragment | 3.16 | 0 |
| S14_extracted_k141_8467     | 8853  | No | NA | 0 | 1              | Not-determined  | Genome-fragment | NA   | 0 |
| S3_vs_k141_60616  full      | 1315  | No | NA | 0 | 0              | Low-quality     | Genome-fragment | 2.82 | 0 |
| S14_extracted_k141_111238   | 1674  | No | NA | 0 | 2              | Not-determined  | Genome-fragment | NA   | 0 |
| S14_extracted_k141_59845    | 6195  | No | NA | 0 | 2              | Not-determined  | Genome-fragment | NA   | 0 |
| S14_extracted_k141_15976    | 1735  | No | NA | 0 | 2              | Not-determined  | Genome-fragment | NA   | 0 |
| S14_extracted_k141_23057    | 1299  | No | NA | 0 | 0              | Not-determined  | Genome-fragment | NA   | 0 |
| S14_extracted_k141_81814    | 1304  | No | NA | 0 | 0              | Not-determined  | Genome-fragment | NA   | 0 |
| S14_extracted_k141_23548    | 1063  | No | NA | 0 | 1              | Not-determined  | Genome-fragment | NA   | 0 |
| S3_vs_k141_45925  full      | 1315  | No | NA | 1 | 0              | Low-quality     | Genome-fragment | 2.15 | 0 |
| S14_extracted_k141_66796    | 9524  | No | NA | 0 | 7              | Not-determined  | Genome-fragment | NA   | 0 |
| S14_extracted_k141_111271   | 2245  | No | NA | 0 | 0              | Not-determined  | Genome-fragment | NA   | 0 |
| S7_vs_119932  full          | 1315  | No | NA | 0 | 0              | Low-quality     | Genome-fragment | 0.51 | 0 |
| S10_extracted_41013         | 1315  | No | NA | 1 | 0              | Low-quality     | Genome-fragment | 2.2  | 0 |
| S16_vs_40186  full          | 1315  | No | NA | 1 | 0              | Low-quality     | Genome-fragment | 2.2  | 0 |
| S16_vs_134758  full         | 1315  | No | NA | 1 | 0              | Low-quality     | Genome-fragment | 1.79 | 0 |
| S10_vs_40126  full          | 1315  | No | NA | 1 | 0              | Low-quality     | Genome-fragment | 0.69 | 0 |
| S12_vs_k141_181388  full    | 1315  | No | NA | 0 | 2              | Low-quality     | Genome-fragment | 0.71 | 0 |
| S15_vs_25563  full          | 1315  | No | NA | 0 | 0              | Low-quality     | Genome-fragment | NA   | 0 |
| S14_extracted_k141_96265    | 1128  | No | NA | 0 | 0              | Not-determined  | Genome-fragment | NA   | 0 |
| S14_extracted_k141_104059   | 3118  | No | NA | 0 | 0              | Not-determined  | Genome-fragment | NA   | 0 |
| S6_vs_k141_56015  H2genome  | 1315  | No | NA | 1 | 0              | Low-quality     | Genome-fragment | 3.1  | 0 |
| S8_vs_k141_58818  H2genome  | 1315  | No | NA | 0 | 0              | Low-quality     | Genome-fragment | 4.81 | 0 |
| S14_extracted_k141_30721    | 10765 | No | NA | 0 | 0              | Not-determined  | Genome-fragment | NA   | 0 |
| S14_extracted_k141_1265     | 3459  | No | NA | 0 | 3              | Not-determined  | Genome-fragment | NA   | 0 |
| S14_extracted_k141_8558     | 1008  | No | NA | 0 | 1              | Not-determined  | Genome-fragment | NA   | 0 |
| S9_vs_k141_90036  full      | 1316  | No | NA | 0 | 0              | Low-quality     | Genome-fragment | 1.98 | 0 |
| S14_extracted_k141_81943    | 5207  | No | NA | 0 | 2              | Not-determined  | Genome-fragment | NA   | 0 |
| S14_extracted_k141_8630     | 1076  | No | NA | 0 | 1              | Not-determined  | Genome-fragment | NA   | 0 |
| S11_vs_k141_28463  full     | 1316  | No | NA | 0 | 0              | Low-quality     | Genome-fragment | 2.46 | 0 |
| S14_extracted_k141_16123    | 1726  | No | NA | 0 | 2              | Not-determined  | Genome-fragment | NA   | 0 |
| S14_extracted_k141_111391   | 3001  | No | NA | 0 | 1              | Not-determined  | Genome-fragment | NA   | 0 |
| S11_vs_k141_56916  full     | 1316  | No | NA | 0 | 1              | Low-quality     | Genome-fragment | 3.55 | 0 |
| S14_extracted_k141_82210    | 1316  | No | NA | 4 | 0              | Low-quality     | Genome-fragment | 4.34 | 0 |
| S14_extracted_k141_96349    | 1036  | No | NA | 0 | 0              | Not-determined  | Genome-fragment | NA   | 0 |
| S14_extracted_k141_12350    | 1551  | No | NA | 0 | 0              | Not-determined  | Genome-fragment | NA   | 0 |
| S14_vs_k141_90418  full     | 1316  | No | NA | 4 | 0              | Low-quality     | Genome-fragment | 2.16 | 0 |
| S1_vs_k141_56918  full      | 1316  | No | NA | 2 | 0              | Low-quality     | Genome-fragment | 3.63 | 0 |
| S14_extracted_k141_66956    | 1434  | No | NA | 0 | 2              | Not-determined  | Genome-fragment | NA   | 0 |
| S14_extracted_k141_60073    | 3245  | No | NA | 0 | 3              | Not-determined  | Genome-fragment | NA   | 0 |
| S1_vs_k141_84319  H2genome  | 1316  | No | NA | 1 | 0              | Low-quality     | Genome-fragment | 1.74 | 0 |
| S5_extracted_k141_55843     | 1316  | No | NA | 0 | 0              | Low-quality     | Genome-fragment | 2.46 | 0 |
| S5_vs_k141_60873  full      | 1316  | No | NA | 2 | 0              | Low-quality     | Genome-fragment | 1.73 | 0 |
| S5_vs_k141_18792  full      | 1316  | No | NA | 0 | 0              | Low-quality     | Genome-fragment | 2.25 | 0 |
| S14_extracted_k141_66996    | 3672  | No | NA | 0 | 2              | Not-determined  | Genome-fragment | NA   | 0 |
| S5_vs_k141_19134  H2genome  | 1316  | No | NA | 2 | 0              | Low-quality     | Genome-fragment | 2.57 | 0 |
| S16_vs_79629  full          | 1316  | No | NA | 1 | 0              | Low-quality     | Genome-fragment | 2.63 | 0 |
| S14_extracted_k141_52790    | 1315  | No | NA | 0 | 1              | Not-determined  | Genome-fragment | NA   | 0 |
| S14_extracted_k141_52799    |       |    |    |   |                |                 |                 |      |   |



|                            |       |    |    |   |   |                |                 |    |      |   |
|----------------------------|-------|----|----|---|---|----------------|-----------------|----|------|---|
| S14_extracted_k141_74724   | 3216  | No | NA | 0 | 2 | Not-determined | Genome-fragment | NA | 0.95 | 0 |
| S14_vs_k141_80850  full    | 3218  | No | NA | 1 | 0 | Low-quality    | Genome-fragment | NA | 0.86 | 0 |
| S3_extracted_k141_104992   | 1318  | No | NA | 0 | 0 | Low-quality    | Genome-fragment | NA | 1.88 | 0 |
| S3_vs_k141_64324  full     | 1318  | No | NA | 1 | 0 | Low-quality    | Genome-fragment | NA | 1.68 | 0 |
| S14_extracted_k141_1515    | 1279  | No | NA | 0 | 1 | Not-determined | Genome-fragment | NA | 2.2  | 0 |
| S3_vs_k141_108476  H2gene  | 1318  | No | NA | 0 | 1 | Low-quality    | Genome-fragment | NA | 2.02 | 0 |
| S5_vs_k141_95556  full     | 1318  | No | NA | 0 | 0 | Not-determined | Genome-fragment | NA | 2.08 | 0 |
| S7_vs_46134  full          | 1318  | No | NA | 1 | 0 | Low-quality    | Genome-fragment | NA | 2.32 | 0 |
| S14_extracted_k141_18470   | 1629  | No | NA | 0 | 0 | Not-determined | Genome-fragment | NA | 4.34 | 0 |
| S14_extracted_k141_74768   | 1690  | No | NA | 0 | 0 | Not-determined | Genome-fragment | NA | 4.33 | 0 |
| S14_extracted_k141_104530  | 1082  | No | NA | 0 | 0 | Not-determined | Genome-fragment | NA | 2.94 | 0 |
| S14_extracted_k141_74780   | 1087  | No | NA | 0 | 1 | Not-determined | Genome-fragment | NA | 2.25 | 0 |
| S14_extracted_k141_31099   | 1019  | No | NA | 0 | 0 | Low-quality    | Genome-fragment | NA | 3.73 | 0 |
| S7_vs_81343  full          | 1318  | No | NA | 1 | 0 | Low-quality    | Genome-fragment | NA | 0.33 | 0 |
| S7_vs_74253  H2gene        | 1318  | No | NA | 1 | 0 | Low-quality    | Genome-fragment | NA | 2.08 | 0 |
| S14_extracted_k141_1539    | 1051  | No | NA | 0 | 1 | Not-determined | Genome-fragment | NA | 2.32 | 0 |
| S14_extracted_k141_38501   | 1146  | No | NA | 0 | 1 | Not-determined | Genome-fragment | NA | 2.08 | 0 |
| S14_extracted_k141_82271   | 1503  | No | NA | 0 | 1 | Not-determined | Genome-fragment | NA | 2.08 | 0 |
| S16_vs_20803  full         | 1318  | No | NA | 0 | 1 | Low-quality    | Genome-fragment | NA | 2.32 | 0 |
| S16_vs_123704  full        | 1318  | No | NA | 0 | 1 | Low-quality    | Genome-fragment | NA | 1.25 | 0 |
| S14_extracted_k141_111875  | 1004  | No | NA | 0 | 0 | Not-determined | Genome-fragment | NA | 4.34 | 0 |
| S13_extracted_63849        | 1319  | No | NA | 0 | 1 | Low-quality    | Genome-fragment | NA | 4.33 | 0 |
| S14_extracted_k141_53022   | 1778  | No | NA | 0 | 2 | Not-determined | Genome-fragment | NA | 2.94 | 0 |
| S14_extracted_k141_67575   | 1319  | No | NA | 2 | 0 | Low-quality    | Genome-fragment | NA | 2.14 | 0 |
| S14_vs_k141_111951  full   | 1319  | No | NA | 4 | 0 | Low-quality    | Genome-fragment | NA | 4.04 | 0 |
| S1_extracted_k141_115844   | 1319  | No | NA | 0 | 0 | Not-determined | Genome-fragment | NA | 1.32 | 0 |
| S15_extracted_14624        | 1319  | No | NA | 2 | 0 | Low-quality    | Genome-fragment | NA | 2.22 | 0 |
| S14_extracted_k141_31158   | 2002  | No | NA | 0 | 2 | Not-determined | Genome-fragment | NA | 3.72 | 0 |
| S8_vs_k141_66979  full     | 1319  | No | NA | 0 | 0 | Low-quality    | Genome-fragment | NA | 2.34 | 0 |
| S14_extracted_k141_74961   | 1118  | No | NA | 0 | 0 | Not-determined | Genome-fragment | NA | 0.69 | 0 |
| S14_extracted_k141_1622    | 1035  | No | NA | 0 | 1 | Not-determined | Genome-fragment | NA | 1.1  | 0 |
| S14_extracted_k141_104679  | 1312  | No | NA | 0 | 1 | Not-determined | Genome-fragment | NA | 1.63 | 0 |
| S14_vs_k141_81134  H2gene  | 1320  | No | NA | 1 | 0 | Low-quality    | Genome-fragment | NA | 2.62 | 0 |
| S14_extracted_k141_1648    | 1077  | No | NA | 0 | 1 | Not-determined | Genome-fragment | NA | 0.89 | 0 |
| S14_extracted_k141_155679  | 1320  | No | NA | 1 | 0 | Low-quality    | Genome-fragment | NA | 3.17 | 0 |
| S14_extracted_k141_104691  | 1062  | No | NA | 0 | 0 | Not-determined | Genome-fragment | NA | 0.32 | 0 |
| S1_extracted_k141_59699    | 1320  | No | NA | 1 | 0 | Low-quality    | Genome-fragment | NA | 2.73 | 0 |
| S14_extracted_k141_8940    | 1836  | No | NA | 0 | 1 | Not-determined | Genome-fragment | NA | 0.71 | 0 |
| S14_extracted_k141_38611   | 1374  | No | NA | 0 | 0 | Not-determined | Genome-fragment | NA | 3.09 | 0 |
| S11_extracted_k141_60061   | 1320  | No | NA | 0 | 1 | Low-quality    | Genome-fragment | NA | 1.55 | 0 |
| S14_extracted_k141_36781   | 1201  | No | NA | 0 | 1 | Not-determined | Genome-fragment | NA | 2.09 | 0 |
| S1_vs_k141_107954  full    | 1320  | No | NA | 0 | 0 | Low-quality    | Genome-fragment | NA | 2.42 | 0 |
| S14_extracted_k141_104708  | 3584  | No | NA | 0 | 1 | Not-determined | Genome-fragment | NA | 0.94 | 0 |
| S14_extracted_k141_96802   | 3107  | No | NA | 0 | 2 | Not-determined | Genome-fragment | NA | 4.2  | 0 |
| S3_extracted_k141_78824    | 1320  | No | NA | 0 | 1 | Low-quality    | Genome-fragment | NA | 3.28 | 0 |
| S14_extracted_k141_82400   | 2888  | No | NA | 0 | 1 | Not-determined | Genome-fragment | NA | 4.2  | 0 |
| S14_extracted_k141_8957    | 1163  | No | NA | 0 | 1 | Not-determined | Genome-fragment | NA | 3.09 | 0 |
| S3_vs_k141_117904  full    | 1320  | No | NA | 0 | 0 | Low-quality    | Genome-fragment | NA | 3.22 | 0 |
| S14_extracted_k141_11233   | 1778  | No | NA | 0 | 0 | Not-determined | Genome-fragment | NA | 1.62 | 0 |
| S14_extracted_k141_45366   | 1647  | No | NA | 0 | 0 | Not-determined | Genome-fragment | NA | 4.34 | 0 |
| S10_extracted_54035        | 1320  | No | NA | 1 | 0 | Low-quality    | Genome-fragment | NA | 2.09 | 0 |
| S8_extracted_k141_81881    | 1320  | No | NA | 2 | 0 | Low-quality    | Genome-fragment | NA | 1.86 | 0 |
| S14_extracted_k141_53183   | 1317  | No | NA | 0 | 3 | Not-determined | Genome-fragment | NA | 0.58 | 0 |
| S17_vs_k141_158721  H2gene | 1321  | No | NA | 1 | 0 | Low-quality    | Genome-fragment | NA | 1.93 | 0 |
| S11_extracted_k141_55649   | 1321  | No | NA | 0 | 2 | Low-quality    | Genome-fragment | NA | 0.83 | 0 |
| S14_extracted_k141_75075   | 1108  | No | NA | 0 | 0 | Not-determined | Genome-fragment | NA | 0.46 | 0 |
| S14_extracted_k141_45391   | 8902  | No | NA | 0 | 4 | Not-determined | Genome-fragment | NA | 0.58 | 0 |
| S14_extracted_k141_40091   | 3424  | No | NA | 0 | 2 | Not-determined | Genome-fragment | NA | 0.58 | 0 |
| S14_extracted_k141_82455   | 1026  | No | NA | 0 | 1 | Not-determined | Genome-fragment | NA | 2.18 | 0 |
| S14_extracted_k141_31311   | 1398  | No | NA | 0 | 3 | Not-determined | Genome-fragment | NA | 0.69 | 0 |
| S11_vs_k141_144550  full   | 1321  | No | NA | 3 | 0 | Low-quality    | Genome-fragment | NA | 1.1  | 0 |
| S14_extracted_k141_82467   | 1084  | No | NA | 0 | 1 | Not-determined | Genome-fragment | NA | 1.63 | 0 |
| S14_extracted_k141_38726   | 1305  | No | NA | 0 | 1 | Not-determined | Genome-fragment | NA | 2.62 | 0 |
| S14_extracted_k141_22200   | 1321  | No | NA | 1 | 0 | Low-quality    | Genome-fragment | NA | 0.89 | 0 |
| S14_extracted_k141_45407   | 1514  | No | NA | 0 | 0 | Not-determined | Genome-fragment | NA | 3.17 | 0 |
| S14_extracted_k141_31343   | 2128  | No | NA | 0 | 1 | Not-determined | Genome-fragment | NA | 0.32 | 0 |
| S1_vs_k141_44768  full     | 1321  | No | NA | 0 | 1 | Low-quality    | Genome-fragment | NA | 2.73 | 0 |
| S5_vs_k141_48623  full     | 1321  | No | NA | 0 | 1 | Low-quality    | Genome-fragment | NA | 0.71 | 0 |
| S14_extracted_k141_60763   | 6623  | No | NA | 0 | 0 | Not-determined | Genome-fragment | NA | 3.09 | 0 |
| S14_extracted_k141_23748   | 1188  | No | NA | 0 | 0 | Not-determined | Genome-fragment | NA | 1.55 | 0 |
| S5_vs_k141_15854  full     | 1321  | No | NA | 0 | 0 | Low-quality    | Genome-fragment | NA | 2.09 | 0 |
| S14_extracted_k141_38851   | 1491  | No | NA | 0 | 0 | Not-determined | Genome-fragment | NA | 2.42 | 0 |
| S5_vs_k141_36342  full     | 1321  | No | NA | 1 | 0 | Low-quality    | Genome-fragment | NA | 0.94 | 0 |
| S16_extracted_36088        | 1321  | No | NA | 0 | 0 | Low-quality    | Genome-fragment | NA | 3.43 | 0 |
| S16_vs_13021  full         | 1321  | No | NA | 0 | 0 | Low-quality    | Genome-fragment | NA | 3.02 | 0 |
| S14_extracted_k141_53416   | 1213  | No | NA | 0 | 0 | Not-determined | Genome-fragment | NA | 2.09 | 0 |
| S14_extracted_k141_53417   | 1036  | No | NA | 0 | 0 | Not-determined | Genome-fragment | NA | 0.83 | 0 |
| S14_extracted_k141_104954  | 1227  | No | NA | 0 | 1 | Not-determined | Genome-fragment | NA | 3.22 | 0 |
| S14_extracted_k141_67690   | 3388  | No | NA | 0 | 0 | Not-determined | Genome-fragment | NA | 1.71 | 0 |
| S12_vs_k141_126208  full   | 1321  | No | NA | 0 | 2 | Low-quality    | Genome-fragment | NA | 0.46 | 0 |
| S14_extracted_k141_38960   | 1167  | No | NA | 0 | 1 | Not-determined | Genome-fragment | NA | 2.37 | 0 |
| S14_extracted_k141_6773    | 4357  | No | NA | 0 | 2 | Not-determined | Genome-fragment | NA | 1.5  | 0 |
| S14_extracted_k141_112173  | 1189  | No | NA | 0 | 2 | Not-determined | Genome-fragment | NA | 0.71 | 0 |
| S15_vs_16165  full         | 1321  | No | NA | 0 | 0 | Low-quality    | Genome-fragment | NA | 2.37 | 0 |
| S15_vs_65294  full         | 1321  | No | NA | 0 | 0 | Low-quality    | Genome-fragment | NA | 1.5  | 0 |
| S14_extracted_k141_105002  | 1249  | No | NA | 0 | 1 | Not-determined | Genome-fragment | NA | 0.71 | 0 |
| S14_extracted_k141_82736   | 5689  | No | NA | 0 | 2 | Not-determined | Genome-fragment | NA | 0.83 | 0 |
| S8_vs_k141_155412  H2gene  | 1321  | No | NA | 1 | 0 | Low-quality    | Genome-fragment | NA | 1.1  | 0 |
| S17_vs_k141_164980  full   | 1322  | No | NA | 0 | 0 | Low-quality    | Genome-fragment | NA | 2.77 | 0 |
| S17_vs_k141_51377  full    | 1322  | No | NA | 0 | 1 | Low-quality    | Genome-fragment | NA | 2.95 | 0 |
| S9_extracted_k141_31622    | 1322  | No | NA | 1 | 0 | Low-quality    | Genome-fragment | NA | 2.68 | 0 |
| S14_extracted_k141_105058  | 3059  | No | NA | 0 | 0 | Not-determined | Genome-fragment | NA | 2.73 | 0 |
| S9_vs_k141_6541  full      | 1322  | No | NA | 0 | 0 | Low-quality    | Genome-fragment | NA | 0.71 | 0 |
| S14_extracted_k141_75300   | 1174  | No | NA | 0 | 1 | Not-determined | Genome-fragment | NA | 3.09 | 0 |
| S14_extracted_k141_75303   | 1164  | No | NA | 0 | 0 | Not-determined | Genome-fragment | NA | 1.55 | 0 |
| S14_extracted_k141_31437   | 1076  | No | NA | 0 | 0 | Not-determined | Genome-fragment | NA | 2.35 | 0 |
| S13_vs_68786  full         | 1322  | No | NA | 0 | 0 | Low-quality    | Genome-fragment | NA | 0.83 | 0 |
| S14_extracted_k141_82770   | 1135  | No | NA | 0 | 1 | Not-determined | Genome-fragment | NA | 3.22 | 0 |
| S14_extracted_k141_31441   | 1914  | No | NA | 0 | 1 | Not-determined | Genome-fragment | NA | 2.81 | 0 |
| S14_vs_k141_82046  full    | 1322  | No | NA | 0 | 0 | Low-quality    | Genome-fragment | NA | 1.84 | 0 |
| S14_vs_k141_35185  full    | 1322  | No | NA | 0 | 0 | Low-quality    | Genome-fragment | NA | 0.46 | 0 |
| S1_extracted_k141_340797   | 1322  | No | NA | 0 | 2 | Low-quality    | Genome-fragment | NA | 2.68 | 0 |
| S5_vs_k141_25542  H2gene   | 1322  | No | NA | 1 | 0 | Low-quality    | Genome-fragment | NA | 3.02 | 0 |
| S14_extracted_k141_1927    | 6101  | No | NA | 0 | 3 | Not-determined | Genome-fragment | NA | 0.83 | 0 |
| S14_extracted_k141_31444   | 13377 | No | NA | 0 | 0 | Not-determined | Genome-fragment | NA | 3.22 | 0 |
| S5_vs_k141_58617  H2gene   | 1322  | No | NA | 1 | 0 | Low-quality    | Genome-fragment | NA | 0.82 | 0 |
| S14_extracted_k141_90110   | 3828  | No | NA | 0 | 1 | Not-determined | Genome-fragment | NA | 0.83 | 0 |
| S12_vs_k141_63476  full    | 1322  | No | NA | 0 | 1 | Low-quality    | Genome-fragment | NA | 3.09 | 0 |
| S12_vs_k141_87776  full    | 1322  | No | NA | 0 | 0 | Low-quality    | Genome-fragment | NA | 3.22 | 0 |
| S8_vs_k141_157830  full    | 1322  | No | NA | 2 | 0 | Low-quality    | Genome-fragment | NA | 1.55 | 0 |
| S14_extracted_k141_75365   | 1530  | No | NA | 0 | 3 | Not-determined | Genome-fragment | NA | 2.09 | 0 |
| S8_vs_k141_57161  full     | 1322  | No | NA | 0 | 0 | Low-quality    | Genome-fragment | NA | 1.55 | 0 |
| S14_extracted_k141_53605   | 2061  | No | NA | 0 | 1 | Not-determined | Genome-fragment | NA | 2.09 | 0 |
| S14_extracted_k141_112258  | 1778  | No | NA | 0 | 2 | Not-determined | Genome-fragment | NA | 1.32 | 0 |
| S14_extracted_k141_67918   | 3793  | No | NA | 0 | 2 | Not-determined | Genome-fragment | NA | 2.9  | 0 |
| S17_extracted_k141_41175   | 1323  | No | NA | 0 | 0 | Low-quality    | Genome-fragment | NA | 4.2  | 0 |
| S11_vs_k141_72422  full    | 1323  | No | NA | 0 | 0 | Low-quality    | Genome-fragment | NA | 3.28 | 0 |
| S14_extracted_k141_24079   | 3164  | No | NA | 0 | 1 | Not-determined | Genome-fragment | NA | 3.09 | 0 |
| S14_extracted_k141_97067   | 1136  | No | NA | 0 | 0 | Not-determined | Genome-fragment | NA | 3.22 | 0 |
| S14_extracted_k141_16969   | 2222  | No | NA | 0 | 2 | Not-determined | Genome-fragment | NA | 1.62 | 0 |
| S13_vs_20323  full         | 1323  | No | NA | 1 | 0 | Low-quality    | Genome-fragment | NA | 4.34 | 0 |
| S14_extracted_k141_7832    | 1323  | No | NA | 0 | 0 | Low-quality    | Genome-fragment | NA | 2.09 | 0 |
| S14_extracted_k141_53687   | 3574  | No | NA | 0 | 8 | Not-determined | Genome-fragment | NA | 0.71 | 0 |
| S14_extracted_k141_82887   | 1206  | No | NA | 0 | 1 | Not-determined | Genome-fragment | NA | 2.42 | 0 |
| S14_extracted_k141_82904   | 1253  | No | NA | 0 | 1 | Not-determined | Genome-fragment | NA | 3.09 | 0 |
| S14_vs_k141_47996  full    | 1323  | No | NA | 1 | 0 | Low-quality    | Genome-fragment | NA | 1.86 | 0 |
| S14_extracted_k141_17002   | 1517  | No | NA | 0 | 1 | Not-determined | Genome-fragment | NA | 4.63 | 0 |
| S14_extracted_k141_24114   | 3461  | No | NA | 0 | 1 | Not-determined | Genome-fragment | NA | 2.42 | 0 |
| S14_vs_k141_7973  H2gene   | 1323  | No | NA | 2 | 0 | Low-quality    | Genome-fragment | NA | 0.94 | 0 |
| S5_vs_k141_2004  full      | 1323  | No | NA | 2 | 0 | Low-quality    | Genome-fragment | NA | 3.43 | 0 |
| S14_extracted_k141_97184   | 3044  | No | NA | 0 | 2 | Not-determined | Genome-fragment | NA | 3.02 | 0 |
| S14_extracted_k141_82953   | 3044  | No | NA | 0 | 0 | Not-determined | Genome-fragment | NA | 2.09 | 0 |
| S14_extracted_k141_60910   | 1086  |    |    |   |   |                |                 |    |      |   |



|                           |       |    |    |    |   |                |                 |       |   |
|---------------------------|-------|----|----|----|---|----------------|-----------------|-------|---|
| S2_extracted_k141_2535    | 1324  | No | NA | 2  | 0 | Low-quality    | Genome-fragment | 4.82  | 0 |
| S17_vs_k141_60781[full]   | 1325  | No | NA | 1  | 0 | Low-quality    | Genome-fragment | 3.16  | 0 |
| S14_extracted_k141_24315  | 1176  | No | NA | 0  | 0 | Not-determined | Genome-fragment | NA    | 0 |
| S14_extracted_k141_112623 | 1439  | No | NA | 0  | 0 | Not-determined | Genome-fragment | NA    | 0 |
| S14_extracted_k141_97461  | 5020  | No | NA | 0  | 0 | Not-determined | Genome-fragment | NA    | 0 |
| S14_extracted_k141_105592 | 1189  | No | NA | 0  | 0 | Not-determined | Genome-fragment | NA    | 0 |
| S17_vs_k141_135069[full]  | 1325  | No | NA | 0  | 0 | Low-quality    | Genome-fragment | 2.79  | 0 |
| S14_extracted_k141_24349  | 1861  | No | NA | 0  | 1 | Not-determined | Genome-fragment | NA    | 0 |
| S14_extracted_k141_3185   | 13966 | No | NA | 0  | 1 | Not-determined | Genome-fragment | NA    | 0 |
| S14_extracted_k141_76012  | 2272  | No | NA | 0  | 1 | Not-determined | Genome-fragment | NA    | 0 |
| S17_vs_k141_139750[full]  | 1325  | No | NA | 0  | 0 | Low-quality    | Genome-fragment | 3.51  | 0 |
| S17_vs_k141_38488[full]   | 1325  | No | NA | 0  | 0 | Low-quality    | Genome-fragment | 2.42  | 0 |
| S14_extracted_k141_83263  | 3852  | No | NA | 1  | 3 | Not-determined | Genome-fragment | NA    | 0 |
| S14_extracted_k141_31916  | 1167  | No | NA | 0  | 2 | Not-determined | Genome-fragment | NA    | 0 |
| S11_vs_k141_30155[full]   | 1325  | No | NA | 0  | 0 | Low-quality    | Genome-fragment | 2.06  | 0 |
| S14_extracted_k141_68491  | 1665  | No | NA | 0  | 1 | Not-determined | Genome-fragment | NA    | 0 |
| S13_vs_4371[full]         | 1325  | No | NA | 0  | 1 | Low-quality    | Genome-fragment | 0.79  | 0 |
| S14_vs_k141_76814[full]   | 1325  | No | NA | 0  | 0 | Low-quality    | Genome-fragment | 2.64  | 0 |
| S1_vs_k141_31277[full]    | 1325  | No | NA | 0  | 0 | Low-quality    | Genome-fragment | 3.61  | 0 |
| S14_extracted_k141_39524  | 4455  | No | NA | 0  | 0 | Not-determined | Genome-fragment | NA    | 0 |
| S5_extracted_k141_123004  | 1325  | No | NA | 0  | 1 | Low-quality    | Genome-fragment | 0.63  | 0 |
| S14_extracted_k141_112686 | 1572  | No | NA | 0  | 0 | Not-determined | Genome-fragment | NA    | 0 |
| S7_extracted_76682        | 1325  | No | NA | 0  | 0 | Low-quality    | Genome-fragment | 1.91  | 0 |
| S14_extracted_k141_76109  | 1366  | No | NA | 0  | 1 | Not-determined | Genome-fragment | NA    | 0 |
| S14_extracted_k141_2471   | 6585  | No | NA | 0  | 2 | Not-determined | Genome-fragment | NA    | 0 |
| S7_vs_52331[full]         | 1325  | No | NA | 1  | 0 | Low-quality    | Genome-fragment | 1.98  | 0 |
| S7_vs_92878[full]         | 1325  | No | NA | 1  | 0 | Low-quality    | Genome-fragment | 2.93  | 0 |
| S14_extracted_k141_54118  | 1328  | No | NA | 0  | 1 | Not-determined | Genome-fragment | NA    | 0 |
| S16_vs_161848[full]       | 1325  | No | NA | 0  | 0 | Low-quality    | Genome-fragment | 0.51  | 0 |
| S14_extracted_k141_97635  | 2199  | No | NA | 0  | 0 | Not-determined | Genome-fragment | NA    | 0 |
| S14_extracted_k141_54171  | 4154  | No | NA | 0  | 1 | Not-determined | Genome-fragment | NA    | 0 |
| S14_extracted_k141_68566  | 7027  | No | NA | 0  | 0 | Not-determined | Genome-fragment | NA    | 0 |
| S10_extracted_98339       | 1325  | No | NA | 0  | 0 | Low-quality    | Genome-fragment | 2.42  | 0 |
| S14_extracted_k141_97654  | 3624  | No | NA | 0  | 2 | Not-determined | Genome-fragment | NA    | 0 |
| S6_extracted_k141_11275   | 1325  | No | NA | 0  | 0 | Low-quality    | Genome-fragment | 2.47  | 0 |
| S8_extracted_k141_11273   | 1325  | No | NA | 0  | 1 | Low-quality    | Genome-fragment | 0.38  | 0 |
| S14_extracted_k141_9897   | 1312  | No | NA | 0  | 1 | Not-determined | Genome-fragment | NA    | 0 |
| S8_vs_k141_196761[full]   | 1325  | No | NA | 1  | 0 | Low-quality    | Genome-fragment | 3.19  | 0 |
| S14_extracted_k141_90781  | 1220  | No | NA | 0  | 0 | Not-determined | Genome-fragment | NA    | 0 |
| S8_vs_k141_100981[full]   | 1325  | No | NA | 0  | 0 | Low-quality    | Genome-fragment | 3.07  | 0 |
| S8_vs_k141_205417[full]   | 1325  | No | NA | 2  | 0 | Low-quality    | Genome-fragment | 3.18  | 0 |
| S9_extracted_k141_3634    | 1326  | No | NA | 0  | 0 | Low-quality    | Genome-fragment | 2.02  | 0 |
| S9_vs_k141_69304[full]    | 1326  | No | NA | 0  | 1 | Low-quality    | Genome-fragment | 0.63  | 0 |
| S14_extracted_k141_2591   | 1075  | No | NA | 0  | 1 | Not-determined | Genome-fragment | NA    | 0 |
| S14_extracted_k141_81252  | 1326  | No | NA | 2  | 0 | Low-quality    | Genome-fragment | 4.36  | 0 |
| S14_vs_k141_62872[full]   | 1326  | No | NA | 3  | 0 | Low-quality    | Genome-fragment | 3.41  | 0 |
| S14_extracted_k141_83439  | 3399  | No | NA | 0  | 3 | Not-determined | Genome-fragment | NA    | 0 |
| S14_extracted_k141_9888   | 4865  | No | NA | 0  | 2 | Not-determined | Genome-fragment | NA    | 0 |
| S14_vs_k141_121411[full]  | 1326  | No | NA | 0  | 0 | Low-quality    | Genome-fragment | 2.17  | 0 |
| S14_extracted_k141_32110  | 1164  | No | NA | 0  | 0 | Not-determined | Genome-fragment | NA    | 0 |
| S1_vs_k141_12545[full]    | 1326  | No | NA | 0  | 0 | Low-quality    | Genome-fragment | 3.29  | 0 |
| S7_extracted_25119        | 1326  | No | NA | 0  | 1 | Low-quality    | Genome-fragment | 1     | 0 |
| S14_extracted_k141_54344  | 1041  | No | NA | 0  | 1 | Not-determined | Genome-fragment | NA    | 0 |
| S14_extracted_k141_32142  | 3086  | No | NA | 0  | 0 | Not-determined | Genome-fragment | NA    | 0 |
| S14_extracted_k141_61371  | 1369  | No | NA | 0  | 1 | Not-determined | Genome-fragment | NA    | 0 |
| S14_extracted_k141_54357  | 1678  | No | NA | 0  | 0 | Not-determined | Genome-fragment | NA    | 0 |
| S14_extracted_k141_68679  | 1180  | No | NA | 0  | 1 | Not-determined | Genome-fragment | NA    | 0 |
| S7_vs_134704[full]        | 1326  | No | NA | 0  | 1 | Low-quality    | Genome-fragment | 0.93  | 0 |
| S14_extracted_k141_24621  | 1020  | No | NA | 0  | 0 | Not-determined | Genome-fragment | NA    | 0 |
| S14_extracted_k141_68699  | 1392  | No | NA | 0  | 1 | Not-determined | Genome-fragment | NA    | 0 |
| S14_extracted_k141_39753  | 1147  | No | NA | 0  | 0 | Not-determined | Genome-fragment | NA    | 0 |
| S14_extracted_k141_10028  | 1872  | No | NA | 0  | 0 | Not-determined | Genome-fragment | NA    | 0 |
| S7_vs_135584[full]        | 1326  | No | NA | 2  | 0 | Low-quality    | Genome-fragment | 2.66  | 0 |
| S16_vs_65755[full]        | 1326  | No | NA | 0  | 1 | Low-quality    | Genome-fragment | 2.79  | 0 |
| S14_extracted_k141_76366  | 1217  | No | NA | 0  | 1 | Not-determined | Genome-fragment | NA    | 0 |
| S14_extracted_k141_61448  | 1097  | No | NA | 0  | 0 | Not-determined | Genome-fragment | NA    | 0 |
| S16_vs_3909[full]         | 1326  | No | NA | 0  | 0 | Low-quality    | Genome-fragment | 3.67  | 0 |
| S14_extracted_k141_46380  | 1369  | No | NA | 0  | 1 | Not-determined | Genome-fragment | NA    | 0 |
| S14_extracted_k141_3640   | 1206  | No | NA | 0  | 0 | Not-determined | Genome-fragment | NA    | 0 |
| S14_extracted_k141_83574  | 3061  | No | NA | 0  | 0 | Not-determined | Genome-fragment | NA    | 0 |
| S16_vs_6204[full]         | 1326  | No | NA | 1  | 0 | Low-quality    | Genome-fragment | 0.92  | 0 |
| S10_extracted_17256       | 1326  | No | NA | 0  | 0 | Low-quality    | Genome-fragment | 0.91  | 0 |
| S14_extracted_k141_83593  | 3568  | No | NA | 0  | 0 | Not-determined | Genome-fragment | NA    | 0 |
| S14_extracted_k141_68748  | 3107  | No | NA | 0  | 3 | Not-determined | Genome-fragment | NA    | 0 |
| S14_extracted_k141_105895 | 1070  | No | NA | 0  | 0 | Not-determined | Genome-fragment | NA    | 0 |
| S14_extracted_k141_39817  | 1318  | No | NA | 0  | 0 | Not-determined | Genome-fragment | NA    | 0 |
| S12_vs_k141_150592[full]  | 1326  | No | NA | 3  | 0 | Low-quality    | Genome-fragment | 3.54  | 0 |
| S14_extracted_k141_76464  | 2303  | No | NA | 0  | 2 | Not-determined | Genome-fragment | NA    | 0 |
| S17_extracted_k141_1720   | 1327  | No | NA | 0  | 1 | Low-quality    | Genome-fragment | 2.7   | 0 |
| S14_extracted_k141_32295  | 2490  | No | NA | 0  | 0 | Not-determined | Genome-fragment | NA    | 0 |
| S14_extracted_k141_76480  | 1420  | No | NA | 0  | 1 | Not-determined | Genome-fragment | NA    | 0 |
| S14_extracted_k141_54508  | 6817  | No | NA | 0  | 1 | Not-determined | Genome-fragment | NA    | 0 |
| S17_vs_k141_129691[full]  | 1327  | No | NA | 0  | 0 | Low-quality    | Genome-fragment | 2.57  | 0 |
| S14_extracted_k141_76491  | 4131  | No | NA | 0  | 4 | Not-determined | Genome-fragment | NA    | 0 |
| S9_extracted_k141_20317   | 1327  | No | NA | 0  | 0 | Low-quality    | Genome-fragment | 4.35  | 0 |
| S14_extracted_k141_68855  | 1238  | No | NA | 0  | 1 | Not-determined | Genome-fragment | NA    | 0 |
| S13_vs_98603[full]        | 1327  | No | NA | 0  | 0 | Low-quality    | Genome-fragment | 1.86  | 0 |
| S14_extracted_k141_2728   | 1387  | No | NA | 0  | 0 | Not-determined | Genome-fragment | NA    | 0 |
| S14_extracted_k141_68862  | 1730  | No | NA | 1  | 0 | Not-determined | Genome-fragment | NA    | 0 |
| S14_vs_k141_44677[full]   | 1327  | No | NA | 2  | 0 | Low-quality    | Genome-fragment | 2.94  | 0 |
| S14_extracted_k141_68882  | 2765  | No | NA | 0  | 1 | Not-determined | Genome-fragment | NA    | 0 |
| S14_extracted_k141_54500  | 1126  | No | NA | 0  | 1 | Not-determined | Genome-fragment | NA    | 0 |
| S14_extracted_k141_2792   | 3545  | No | NA | 0  | 2 | Not-determined | Genome-fragment | NA    | 0 |
| S14_extracted_k141_105991 | 1511  | No | NA | 0  | 0 | Not-determined | Genome-fragment | NA    | 0 |
| S14_extracted_k141_39919  | 1044  | No | NA | 0  | 1 | Not-determined | Genome-fragment | NA    | 0 |
| S1_vs_k141_44939[full]    | 1327  | No | NA | 2  | 0 | Low-quality    | Genome-fragment | 2.48  | 0 |
| S14_extracted_k141_68913  | 4025  | No | NA | 0  | 1 | Not-determined | Genome-fragment | NA    | 0 |
| S14_extracted_k141_83735  | 1395  | No | NA | 0  | 1 | Not-determined | Genome-fragment | NA    | 0 |
| S14_extracted_k141_97887  | 1238  | No | NA | 0  | 1 | Not-determined | Genome-fragment | NA    | 0 |
| S1_vs_k141_25685[full]    | 1327  | No | NA | 1  | 0 | Low-quality    | Genome-fragment | 2.86  | 0 |
| S3_extracted_k141_90402   | 1327  | No | NA | 1  | 0 | Low-quality    | Genome-fragment | 2.43  | 0 |
| S14_extracted_k141_91031  | 2114  | No | NA | 0  | 0 | Not-determined | Genome-fragment | NA    | 0 |
| S14_extracted_k141_106055 | 1156  | No | NA | 0  | 1 | Not-determined | Genome-fragment | NA    | 0 |
| S14_extracted_k141_83790  | 1995  | No | NA | 0  | 0 | Not-determined | Genome-fragment | NA    | 0 |
| S14_extracted_k141_46606  | 1393  | No | NA | 0  | 0 | Not-determined | Genome-fragment | NA    | 0 |
| S3_extracted_k141_90524   | 1327  | No | NA | 0  | 0 | Low-quality    | Genome-fragment | 2.22  | 0 |
| S14_extracted_k141_76587  | 3525  | No | NA | 0  | 2 | Not-determined | Genome-fragment | NA    | 0 |
| S16_vs_10959[full]        | 1327  | No | NA | 0  | 2 | Low-quality    | Genome-fragment | 1.13  | 0 |
| S14_extracted_k141_10311  | 6037  | No | NA | 0  | 0 | Not-determined | Genome-fragment | NA    | 0 |
| S14_extracted_k141_76606  | 6166  | No | NA | 0  | 1 | Not-determined | Genome-fragment | NA    | 0 |
| S10_extracted_114219      | 1327  | No | NA | 1  | 0 | Low-quality    | Genome-fragment | 2.52  | 0 |
| S12_vs_k141_855141[full]  | 1327  | No | NA | 0  | 0 | Low-quality    | Genome-fragment | 2.1   | 0 |
| S14_extracted_k141_24893  | 1188  | No | NA | 0  | 0 | Not-determined | Genome-fragment | NA    | 0 |
| S14_extracted_k141_68996  | 1491  | No | NA | 0  | 1 | Not-determined | Genome-fragment | NA    | 0 |
| S8_vs_k141_150677[full]   | 1327  | No | NA | 0  | 0 | Low-quality    | Genome-fragment | 0.55  | 0 |
| S14_extracted_k141_76699  | 1044  | No | NA | 0  | 1 | Not-determined | Genome-fragment | NA    | 0 |
| S17_vs_k141_543141[full]  | 1328  | No | NA | 0  | 0 | Low-quality    | Genome-fragment | 1.19  | 0 |
| S14_extracted_k141_39032  | 3079  | No | NA | 0  | 0 | Not-determined | Genome-fragment | NA    | 0 |
| S13_vs_132887[full]       | 1328  | No | NA | 0  | 1 | Low-quality    | Genome-fragment | 2.17  | 0 |
| S14_extracted_k141_76707  | 1517  | No | NA | 0  | 0 | Not-determined | Genome-fragment | NA    | 0 |
| S13_vs_98940[full]        | 1328  | No | NA | 2  | 0 | Low-quality    | Genome-fragment | 2.18  | 0 |
| S1_extracted_k141_21215   | 1328  | No | NA | 0  | 0 | Low-quality    | Genome-fragment | 2.19  | 0 |
| S14_extracted_k141_91205  | 1098  | No | NA | 0  | 1 | Not-determined | Genome-fragment | NA    | 0 |
| S14_extracted_k141_2883   | 1235  | No | NA | 0  | 0 | Not-determined | Genome-fragment | NA    | 0 |
| S14_extracted_k141_113149 | 1084  | No | NA | 0  | 1 | Not-determined | Genome-fragment | NA    | 0 |
| S3_extracted_k141_42206   | 1328  | No | NA | 1  | 0 | Low-quality    | Genome-fragment | 0.47  | 0 |
| S14_extracted_k141_106156 | 31621 | No | NA | 26 | 0 | Medium-quality | Genome-fragment | 86.11 | 0 |
| S14_extracted_k141_106157 | 1224  | No | NA | 0  | 2 | Not-determined | Genome-fragment | NA    | 0 |
| S14_extracted_k141_38082  | 1145  | No | NA | 0  | 1 | Not-determined | Genome-fragment | NA    | 0 |
| S14_extracted_k141_69104  | 1119  | No | NA | 0  | 1 | Not-determined | Genome-fragment | NA    | 0 |
| S14_extracted_k141_12520  | 1061  | No | NA | 0  | 2 | Not-determined | Genome-fragment | NA    | 0 |
| S5_vs_k141_9591[full]     | 1328  | No | NA | 1  | 0 | Low-quality    | Genome-fragment | 3.06  | 0 |
| S14_extracted_k141_98105  | 11803 | No | NA | 0  | 2 | Not-determined | Genome-fragment | NA    | 0 |
| S7_extracted_108211       | 1328  | No | NA | 0  | 0 | Low-quality    | Genome-fragment | 2.4   | 0 |
| S14_extracted_k141_24983  | 1077  | No | NA | 0  | 0 | Not-determined | Genome-fragment | NA    | 0 |
| S16_vs_7893[full]         | 1328  | No | NA | 0  | 1 | Low-quality    | Genome-fragment | 1.01  | 0 |
| S12_extracted_k141_89421  | 1328  | No | NA | 0  | 1 | Low-quality    | Genome-fragment | 0.88  | 0 |
| S14_extracted_k141_106205 | 2557  | No | NA | 0  | 2 | Not-determined | Genome-fragment | NA    | 0 |
| S14_extracted_k141_69156  | 1021  | No | NA | 0  | 1 | Not-determined | Genome-fragment | NA    | 0 |
| S14_extracted_k141_25012  | 1655  | No | NA | 0  | 1 | Not-determined | Genome-fragment | NA    | 0 |
| S14_extracted_k141_106220 | 1718  | No | NA | 0  | 1 | Not-determined | Genome-fragment | NA    | 0 |
| S12_vs_k141_1662881[full] | 1328  | No | NA | 0  | 0 | Low-quality    | Genome-fragment | 1.96  | 0 |
| S12_vs_k141_98207[full]   | 1328  | No | NA | 2  | 0 | Low-quality    | Genome-fragment | 0.71  | 0 |
| S14_extracted_k141_40243  | 1245  | No | NA | 0  | 2 | Not-determined | Genome-fragment | NA    | 0 |
| S14_extracted_k141_91339  | 3214  | No | NA | 0  | 0 |                |                 |       |   |



|                            |       |    |    |    |   |                |                 |       |   |
|----------------------------|-------|----|----|----|---|----------------|-----------------|-------|---|
| S11_vs_k141_85368  full    | 1330  | No | NA | 3  | 0 | Low-quality    | Genome-fragment | 3.05  | 0 |
| S14_extracted_k141_09420   | 5878  | No | NA | 0  | 1 | Not-determined | Genome-fragment | NA    | 0 |
| S14_extracted_k141_18245   | 2048  | No | NA | 0  | 1 | Not-determined | Genome-fragment | NA    | 0 |
| S11_vs_k141_70606  full    | 1330  | No | NA | 1  | 0 | Low-quality    | Genome-fragment | 2.06  | 0 |
| S14_extracted_k141_84240   | 1888  | No | NA | 0  | 2 | Not-determined | Genome-fragment | NA    | 0 |
| S1_vs_k141_145672  full    | 1330  | No | NA | 0  | 1 | Low-quality    | Genome-fragment | 2.83  | 0 |
| S14_extracted_k141_3246    | 15693 | No | NA | 0  | 7 | Not-determined | Genome-fragment | NA    | 0 |
| S5_vs_k141_47965  full     | 1330  | No | NA | 0  | 0 | Low-quality    | Genome-fragment | 1.01  | 0 |
| S14_extracted_k141_69446   | 1108  | No | NA | 0  | 1 | Not-determined | Genome-fragment | NA    | 0 |
| S14_extracted_k141_10662   | 1976  | No | NA | 0  | 0 | Not-determined | Genome-fragment | NA    | 0 |
| S14_extracted_k141_98415   | 1090  | No | NA | 0  | 0 | Not-determined | Genome-fragment | NA    | 0 |
| S14_extracted_k141_47035   | 6427  | No | NA | 0  | 4 | Not-determined | Genome-fragment | NA    | 0 |
| S14_extracted_k141_25250   | 1733  | No | NA | 0  | 1 | Not-determined | Genome-fragment | NA    | 0 |
| S7_vs_82191  full          | 1330  | No | NA | 0  | 0 | Low-quality    | Genome-fragment | 2.83  | 0 |
| S14_extracted_k141_47059   | 1238  | No | NA | 0  | 1 | Not-determined | Genome-fragment | NA    | 0 |
| S14_extracted_k141_32805   | 1054  | No | NA | 0  | 0 | Not-determined | Genome-fragment | NA    | 0 |
| S14_extracted_k141_32808   | 1859  | No | NA | 0  | 1 | Not-determined | Genome-fragment | NA    | 0 |
| S14_extracted_k141_3252    | 3478  | No | NA | 0  | 2 | Not-determined | Genome-fragment | NA    | 0 |
| S14_extracted_k141_40424   | 1457  | No | NA | 0  | 1 | Not-determined | Genome-fragment | NA    | 0 |
| S10_extracted_78265        | 1330  | No | NA | 0  | 1 | Low-quality    | Genome-fragment | 0.63  | 0 |
| S10_vs_95461  H2gene       | 1330  | No | NA | 0  | 0 | Low-quality    | Genome-fragment | 3.09  | 0 |
| S14_extracted_k141_3277    | 1089  | No | NA | 0  | 2 | Not-determined | Genome-fragment | NA    | 0 |
| S14_extracted_k141_47141   | 1251  | No | NA | 0  | 1 | Not-determined | Genome-fragment | NA    | 0 |
| S14_extracted_k141_69503   | 2668  | No | NA | 0  | 1 | Not-determined | Genome-fragment | NA    | 0 |
| S14_extracted_k141_18371   | 2275  | No | NA | 0  | 1 | Not-determined | Genome-fragment | NA    | 0 |
| S14_extracted_k141_61913   | 1320  | No | NA | 0  | 1 | Not-determined | Genome-fragment | NA    | 0 |
| S14_extracted_k141_113596  | 1231  | No | NA | 0  | 3 | Not-determined | Genome-fragment | NA    | 0 |
| S12_vs_k141_153269  H2gene | 1330  | No | NA | 1  | 0 | Low-quality    | Genome-fragment | 2.95  | 0 |
| S8_vs_k141_17950  full     | 1330  | No | NA | 1  | 0 | Low-quality    | Genome-fragment | 1.24  | 0 |
| S14_extracted_k141_18392   | 1106  | No | NA | 0  | 0 | Not-determined | Genome-fragment | NA    | 0 |
| S14_extracted_k141_98502   | 1895  | No | NA | 0  | 1 | Not-determined | Genome-fragment | NA    | 0 |
| S14_extracted_k141_10776   | 5036  | No | NA | 0  | 4 | Not-determined | Genome-fragment | NA    | 0 |
| S17_extracted_k141_19858   | 1331  | No | NA | 2  | 0 | Low-quality    | Genome-fragment | 2.9   | 0 |
| S17_vs_k141_124452  full   | 1331  | No | NA | 0  | 0 | Low-quality    | Genome-fragment | 1.36  | 0 |
| S9_vs_k141_10094  full     | 1331  | No | NA | 0  | 0 | Low-quality    | Genome-fragment | 1.58  | 0 |
| S14_extracted_k141_10796   | 1050  | No | NA | 0  | 1 | Not-determined | Genome-fragment | NA    | 0 |
| S11_vs_k141_96321  full    | 1331  | No | NA | 1  | 0 | Low-quality    | Genome-fragment | 3.27  | 0 |
| S14_extracted_k141_51017   | 1331  | No | NA | 1  | 0 | Low-quality    | Genome-fragment | 3.57  | 0 |
| S14_extracted_k141_9170    | 1007  | No | NA | 2  | 0 | Not-determined | Genome-fragment | NA    | 0 |
| S14_extracted_k141_10819   | 1003  | No | NA | 0  | 1 | Not-determined | Genome-fragment | NA    | 0 |
| S14_extracted_k141_61962   | 1013  | No | NA | 0  | 0 | Not-determined | Genome-fragment | NA    | 0 |
| S14_extracted_k141_47248   | 1549  | No | NA | 0  | 1 | Not-determined | Genome-fragment | NA    | 0 |
| S14_extracted_k141_32918   | 1655  | No | NA | 0  | 2 | Not-determined | Genome-fragment | NA    | 0 |
| S14_extracted_k141_69583   | 2247  | No | NA | 0  | 1 | Not-determined | Genome-fragment | NA    | 0 |
| S14_vs_k141_25710  full    | 1331  | No | NA | 0  | 0 | Low-quality    | Genome-fragment | 2.31  | 0 |
| S14_extracted_k141_18461   | 2065  | No | NA | 0  | 1 | Not-determined | Genome-fragment | NA    | 0 |
| S14_extracted_k141_18465   | 1129  | No | NA | 0  | 1 | Not-determined | Genome-fragment | NA    | 0 |
| S14_extracted_k141_113680  | 1906  | No | NA | 0  | 0 | Not-determined | Genome-fragment | NA    | 0 |
| S7_vs_82078  full          | 1331  | No | NA | 0  | 0 | Low-quality    | Genome-fragment | 3.39  | 0 |
| S14_extracted_k141_55018   | 1843  | No | NA | 0  | 2 | Not-determined | Genome-fragment | NA    | 0 |
| S14_extracted_k141_10903   | 1048  | No | NA | 0  | 2 | Not-determined | Genome-fragment | NA    | 0 |
| S7_vs_90049  full          | 1331  | No | NA | 0  | 0 | Low-quality    | Genome-fragment | 2.29  | 0 |
| S10_extracted_94973        | 1331  | No | NA | 0  | 0 | Low-quality    | Genome-fragment | 2.85  | 0 |
| S14_extracted_k141_84472   | 1631  | No | NA | 0  | 0 | Not-determined | Genome-fragment | NA    | 0 |
| S12_extracted_k141_143394  | 1331  | No | NA | 0  | 0 | Low-quality    | Genome-fragment | 1.44  | 0 |
| S14_extracted_k141_10946   | 1046  | No | NA | 0  | 2 | Not-determined | Genome-fragment | NA    | 0 |
| S12_vs_k141_150886  full   | 1331  | No | NA | 1  | 0 | Low-quality    | Genome-fragment | 2.56  | 0 |
| S8_vs_k141_124259  full    | 1331  | No | NA | 2  | 0 | Low-quality    | Genome-fragment | 2.27  | 0 |
| S14_extracted_k141_113802  | 1152  | No | NA | 0  | 0 | Not-determined | Genome-fragment | NA    | 0 |
| S9_vs_k141_82359  full     | 1332  | No | NA | 0  | 0 | Low-quality    | Genome-fragment | 1.89  | 0 |
| S14_extracted_k141_113808  | 1113  | No | NA | 0  | 0 | Not-determined | Genome-fragment | NA    | 0 |
| S14_extracted_k141_106620  | 1635  | No | NA | 0  | 0 | Not-determined | Genome-fragment | NA    | 0 |
| S1_extracted_k141_94667    | 1332  | No | NA | 0  | 2 | Low-quality    | Genome-fragment | 2.26  | 0 |
| S14_extracted_k141_33021   | 1778  | No | NA | 0  | 1 | Not-determined | Genome-fragment | NA    | 0 |
| S14_extracted_k141_91868   | 1210  | No | NA | 0  | 0 | Not-determined | Genome-fragment | NA    | 0 |
| S14_extracted_k141_40735   | 1973  | No | NA | 0  | 3 | Not-determined | Genome-fragment | NA    | 0 |
| S14_extracted_k141_47394   | 1011  | No | NA | 0  | 2 | Not-determined | Genome-fragment | NA    | 0 |
| S14_extracted_k141_13032   | 1049  | No | NA | 0  | 1 | Not-determined | Genome-fragment | NA    | 0 |
| S1_vs_k141_123003  full    | 1332  | No | NA | 2  | 0 | Low-quality    | Genome-fragment | 2.27  | 0 |
| S7_vs_70070  full          | 1332  | No | NA | 0  | 0 | Low-quality    | Genome-fragment | 0.76  | 0 |
| S12_vs_k141_95934  full    | 1332  | No | NA | 0  | 0 | Low-quality    | Genome-fragment | 0.79  | 0 |
| S14_extracted_k141_17440   | 1241  | No | NA | 0  | 1 | Not-determined | Genome-fragment | NA    | 0 |
| S8_vs_k141_193229  full    | 1332  | No | NA | 0  | 0 | Low-quality    | Genome-fragment | 2.86  | 0 |
| S14_extracted_k141_106687  | 1390  | No | NA | 0  | 1 | Not-determined | Genome-fragment | NA    | 0 |
| S14_extracted_k141_77123   | 1533  | No | NA | 0  | 2 | Not-determined | Genome-fragment | NA    | 0 |
| S8_vs_k141_53754  H2gene   | 1332  | No | NA | 1  | 0 | Low-quality    | Genome-fragment | 3.07  | 0 |
| S17_vs_k141_143922  full   | 1333  | No | NA | 1  | 0 | Low-quality    | Genome-fragment | 2.91  | 0 |
| S14_extracted_k141_47474   | 6913  | No | NA | 0  | 5 | Not-determined | Genome-fragment | NA    | 0 |
| S9_extracted_k141_90844    | 1333  | No | NA | 0  | 0 | Low-quality    | Genome-fragment | 3.46  | 0 |
| S14_extracted_k141_113926  | 1035  | No | NA | 0  | 0 | Not-determined | Genome-fragment | NA    | 0 |
| S11_extracted_k141_30320   | 1333  | No | NA | 0  | 0 | Low-quality    | Genome-fragment | 2.5   | 0 |
| S14_extracted_k141_1067151 | 1054  | No | NA | 0  | 2 | Not-determined | Genome-fragment | NA    | 0 |
| S14_extracted_k141_47510   | 1484  | No | NA | 0  | 1 | Not-determined | Genome-fragment | NA    | 0 |
| S14_extracted_k141_62219   | 3024  | No | NA | 0  | 3 | Not-determined | Genome-fragment | NA    | 0 |
| S14_extracted_k141_47523   | 2522  | No | NA | 0  | 2 | Not-determined | Genome-fragment | NA    | 0 |
| S14_extracted_k141_3572    | 3647  | No | NA | 0  | 2 | Not-determined | Genome-fragment | NA    | 0 |
| S11_vs_k141_63050  full    | 1333  | No | NA | 0  | 0 | Low-quality    | Genome-fragment | 2.35  | 0 |
| S11_vs_k141_56622  H2gene  | 1333  | No | NA | 1  | 0 | Low-quality    | Genome-fragment | 3.05  | 0 |
| S14_extracted_k141_113860  | 1013  | No | NA | 0  | 0 | Not-determined | Genome-fragment | NA    | 0 |
| S14_extracted_k141_59472   | 1333  | No | NA | 2  | 0 | Low-quality    | Genome-fragment | 4.4   | 0 |
| S14_extracted_k141_52004   | 3841  | No | NA | 0  | 8 | Not-determined | Genome-fragment | NA    | 0 |
| S1_extracted_k141_107808   | 1333  | No | NA | 0  | 0 | Low-quality    | Genome-fragment | 2.96  | 0 |
| S14_extracted_k141_11223   | 5104  | No | NA | 0  | 0 | Not-determined | Genome-fragment | NA    | 0 |
| S1_vs_k141_154342  full    | 1333  | No | NA | 0  | 0 | Low-quality    | Genome-fragment | 2.9   | 0 |
| S14_extracted_k141_77256   | 1235  | No | NA | 0  | 1 | Not-determined | Genome-fragment | NA    | 0 |
| S14_extracted_k141_18746   | 1461  | No | NA | 0  | 0 | Not-determined | Genome-fragment | NA    | 0 |
| S14_extracted_k141_25680   | 3738  | No | NA | 0  | 3 | Not-determined | Genome-fragment | NA    | 0 |
| S1_vs_k141_46033  full     | 1333  | No | NA | 2  | 0 | Low-quality    | Genome-fragment | 3.27  | 0 |
| S3_vs_k141_101199  full    | 1333  | No | NA | 0  | 0 | Low-quality    | Genome-fragment | 2.45  | 0 |
| S14_extracted_k141_18794   | 1086  | No | NA | 0  | 0 | Not-determined | Genome-fragment | NA    | 0 |
| S5_extracted_k141_21896    | 1333  | No | NA | 1  | 0 | Low-quality    | Genome-fragment | 3.48  | 0 |
| S5_vs_k141_41513  full     | 1333  | No | NA | 0  | 0 | Low-quality    | Genome-fragment | 3.07  | 0 |
| S14_extracted_k141_92092   | 5347  | No | NA | 0  | 5 | Not-determined | Genome-fragment | NA    | 0 |
| S7_vs_41724  full          | 1333  | No | NA | 0  | 1 | Low-quality    | Genome-fragment | 2.71  | 0 |
| S14_extracted_k141_98914   | 1734  | No | NA | 0  | 1 | Not-determined | Genome-fragment | NA    | 0 |
| S14_extracted_k141_11298   | 1688  | No | NA | 0  | 1 | Not-determined | Genome-fragment | NA    | 0 |
| S10_extracted_20902        | 1333  | No | NA | 0  | 0 | Low-quality    | Genome-fragment | 0.62  | 0 |
| S10_vs_9396  full          | 1333  | No | NA | 0  | 0 | Low-quality    | Genome-fragment | 3.62  | 0 |
| S14_extracted_k141_25736   | 1195  | No | NA | 0  | 1 | Not-determined | Genome-fragment | NA    | 0 |
| S10_vs_111703  full        | 1333  | No | NA | 1  | 0 | Low-quality    | Genome-fragment | 3.28  | 0 |
| S12_vs_k141_45331  full    | 1333  | No | NA | 0  | 0 | Low-quality    | Genome-fragment | 1.52  | 0 |
| S14_extracted_k141_18951   | 1088  | No | NA | 0  | 0 | Not-determined | Genome-fragment | NA    | 0 |
| S12_vs_k141_109600  full   | 1333  | No | NA | 0  | 1 | Low-quality    | Genome-fragment | 0.79  | 0 |
| S14_extracted_k141_98981   | 1565  | No | NA | 0  | 0 | Not-determined | Genome-fragment | NA    | 0 |
| S14_extracted_k141_11409   | 2644  | No | NA | 0  | 2 | Not-determined | Genome-fragment | NA    | 0 |
| S14_extracted_k141_77487   | 4141  | No | NA | 0  | 0 | Not-determined | Genome-fragment | NA    | 0 |
| S15_extracted_29627        | 1333  | No | NA | 0  | 0 | Low-quality    | Genome-fragment | 1.07  | 0 |
| S14_extracted_k141_47592   | 5359  | No | NA | 0  | 3 | Not-determined | Genome-fragment | NA    | 0 |
| S14_extracted_k141_92240   | 34231 | No | NA | 15 | 0 | High-quality   | Genome-fragment | 98.36 | 0 |
| S14_extracted_k141_41141   | 1232  | No | NA | 0  | 1 | Not-determined | Genome-fragment | NA    | 0 |
| S14_extracted_k141_3905    | 1147  | No | NA | 0  | 0 | Not-determined | Genome-fragment | NA    | 0 |
| S11_extracted_k141_41345   | 1334  | No | NA | 0  | 0 | Low-quality    | Genome-fragment | 2.06  | 0 |
| S14_extracted_k141_40659   | 1334  | No | NA | 1  | 0 | Low-quality    | Genome-fragment | 3.44  | 0 |
| S14_extracted_k141_59973   | 1334  | No | NA | 0  | 0 | Low-quality    | Genome-fragment | 2.11  | 0 |
| S14_extracted_k141_62370   | 1084  | No | NA | 0  | 1 | Not-determined | Genome-fragment | NA    | 0 |
| S14_extracted_k141_19075   | 1411  | No | NA | 0  | 1 | Not-determined | Genome-fragment | NA    | 0 |
| S14_vs_k141_109833  full   | 1334  | No | NA | 0  | 0 | Low-quality    | Genome-fragment | 2.11  | 0 |
| S1_vs_k141_43802  full     | 1334  | No | NA | 0  | 0 | Low-quality    | Genome-fragment | 1.62  | 0 |
| S14_extracted_k141_41188   | 1461  | No | NA | 0  | 0 | Not-determined | Genome-fragment | NA    | 0 |
| S14_extracted_k141_11491   | 2946  | No | NA | 0  | 1 | Not-determined | Genome-fragment | NA    | 0 |
| S1_vs_k141_65375  full     | 1334  | No | NA | 0  | 0 | Low-quality    | Genome-fragment | 0.95  | 0 |
| S14_extracted_k141_11495   | 1368  | No | NA | 0  | 1 | Not-determined | Genome-fragment | NA    | 0 |
| S14_extracted_k141_11496   | 1522  | No | NA | 0  | 1 | Not-determined | Genome-fragment | NA    | 0 |
| S14_extracted_k141_13443   | 1167  | No | NA | 0  | 1 | Not-determined | Genome-fragment | NA    | 0 |
| S3_extracted_k141_44617    | 1334  | No | NA | 0  | 0 | Low-quality    | Genome-fragment | 0.92  | 0 |
| S14_extracted_k141_99109   | 6380  | No | NA | 0  | 3 | Not-determined | Genome-fragment | NA    | 0 |
| S14_extracted_k141_62475   | 1002  | No | NA | 0  | 1 | Not-determined | Genome-fragment | NA    | 0 |
| S14_extracted_k141_50200   | 7562  | No | NA | 0  | 0 | Low-quality    | Genome-fragment | NA    | 0 |
| S3_vs_k141_28149  full     | 1334  | No | NA | 0  | 1 | Low-quality    | Genome-fragment | 0.71  | 0 |
| S5_extracted_k141_59529    | 1334  | No | NA | 1  | 0 | Low-quality    | Genome-fragment | 4.06  | 0 |
| S14_extracted_k141_99127   | 1028  | No | NA | 0  | 1 | Not-determined | Genome-fragment | NA    | 0 |
| S5_vs_k141_47804  full     | 1334  | No | NA | 0  | 0 | Low-quality    | Genome-fragment | 0.86  | 0 |
| S14_extracted_k141_4031    | 1118  | No | NA | 0  | 2 | Not-determined | Genome-fragment | NA    | 0 |
| S7_vs_27154  full          | 1334  | No | NA | 0  | 0 | Low-quality    | Genome-fragment | 3.15  | 0 |
| S14_extracted_k141_3       |       |    |    |    |   |                |                 |       |   |



|                             |       |     |       |    |   |                 |                 |    |       |      |
|-----------------------------|-------|-----|-------|----|---|-----------------|-----------------|----|-------|------|
| S14_extracted_k141_26000    | 11615 | No  | NA    | 0  | 3 | Not-determined  | Genome-fragment | NA | 0     | 0    |
| S14_extracted_k141_31647    | 1180  | No  | NA    | 0  | 0 | Not-determined  | Genome-fragment | NA | 0     | 0    |
| S12_extracted_k141_13845    | 1335  | No  | NA    | 2  | 0 | Low-quality     | Genome-fragment | NA | 3.02  | 0    |
| S14_extracted_k141_99344    | 15862 | No  | NA    | 8  | 0 | Medium-quality  | Genome-fragment | NA | 66.98 | 0    |
| S12_extracted_k141_155069   | 1335  | No  | NA    | 0  | 1 | Low-quality     | Genome-fragment | NA | 0.31  | 0    |
| S14_extracted_k141_99366    | 4930  | No  | NA    | 0  | 4 | Not-determined  | Genome-fragment | NA | 0     | 0    |
| S12_vs_k141_124699  full    | 1335  | No  | NA    | 1  | 0 | Low-quality     | Genome-fragment | NA | 3.67  | 0    |
| S14_extracted_k141_114491   | 15913 | No  | NA    | 7  | 0 | Medium-quality  | Genome-fragment | NA | 65.55 | 0    |
| S8_extracted_k141_90167     | 1335  | No  | NA    | 0  | 1 | Low-quality     | Genome-fragment | NA | 2.03  | 0    |
| S8_extracted_k141_66557     | 1335  | No  | NA    | 1  | 0 | Low-quality     | Genome-fragment | NA | 2.38  | 0    |
| S14_extracted_k141_55819    | 1183  | No  | NA    | 0  | 2 | Not-determined  | Genome-fragment | NA | 0     | 0    |
| S14_extracted_k141_99411    | 3646  | No  | NA    | 0  | 0 | Not-determined  | Genome-fragment | NA | 0     | 0    |
| S17_vs_k141_16748  full     | 1336  | No  | NA    | 1  | 0 | Low-quality     | Genome-fragment | NA | 3.31  | 0    |
| S14_extracted_k141_92593    | 2587  | No  | NA    | 0  | 0 | Not-determined  | Genome-fragment | NA | 0     | 0    |
| S9_extracted_k141_71797     | 1336  | No  | NA    | 0  | 0 | Low-quality     | Genome-fragment | NA | 0.81  | 0    |
| S14_extracted_k141_4242     | 1389  | No  | NA    | 1  | 0 | Not-determined  | Genome-fragment | NA | 0     | 0    |
| S14_extracted_k141_70368    | 3037  | No  | NA    | 0  | 3 | Not-determined  | Genome-fragment | NA | 0     | 0    |
| S14_extracted_k141_159580   | 1236  | No  | NA    | 0  | 2 | Not-determined  | Genome-fragment | NA | 0     | 0    |
| S14_extracted_k141_55885    | 2981  | No  | NA    | 0  | 1 | Not-determined  | Genome-fragment | NA | 0     | 0    |
| S9_vs_k141_75216  full      | 1336  | No  | NA    | 0  | 1 | Low-quality     | Genome-fragment | NA | 3.39  | 0    |
| S11_vs_k141_70130  full     | 1336  | No  | NA    | 0  | 0 | Low-quality     | Genome-fragment | NA | 2.4   | 0    |
| S14_extracted_k141_4266     | 5455  | No  | NA    | 0  | 2 | Not-determined  | Genome-fragment | NA | 0     | 0    |
| S14_extracted_k141_47883    | 1115  | No  | NA    | 0  | 1 | Not-determined  | Genome-fragment | NA | 0     | 0    |
| S14_extracted_k141_70435    | 1082  | No  | NA    | 0  | 0 | Not-determined  | Genome-fragment | NA | 0     | 0    |
| S14_extracted_k141_107398   | 1430  | No  | NA    | 0  | 1 | Not-determined  | Genome-fragment | NA | 0     | 0    |
| S11_vs_k141_3501  l2genome  | 1336  | No  | NA    | 1  | 0 | Low-quality     | Genome-fragment | NA | 3.89  | 0    |
| S14_extracted_k141_47942    | 1283  | No  | NA    | 0  | 0 | Not-determined  | Genome-fragment | NA | 0     | 0    |
| S14_extracted_k141_4306     | 1105  | No  | NA    | 0  | 0 | Not-determined  | Genome-fragment | NA | 0     | 0    |
| S14_extracted_k141_8618     | 1336  | No  | NA    | 0  | 0 | Low-quality     | Genome-fragment | NA | 4.41  | 0    |
| S1_extracted_k141_152750    | 1336  | No  | NA    | 0  | 0 | Low-quality     | Genome-fragment | NA | 2.69  | 0    |
| S5_extracted_k141_143719    | 1336  | No  | NA    | 2  | 0 | Low-quality     | Genome-fragment | NA | 3.88  | 0    |
| S14_extracted_k141_4796     | 1332  | No  | NA    | 0  | 1 | Not-determined  | Genome-fragment | NA | 0.82  | 0    |
| S14_extracted_k141_19642    | 1296  | No  | NA    | 0  | 3 | Not-determined  | Genome-fragment | NA | 0     | 0    |
| S14_extracted_k141_114686   | 1005  | No  | NA    | 0  | 1 | Not-determined  | Genome-fragment | NA | 0     | 0    |
| S7_vs_87919  full           | 1336  | No  | NA    | 1  | 0 | Low-quality     | Genome-fragment | NA | 3.1   | 0    |
| S10_extracted_23266         | 1336  | No  | NA    | 1  | 1 | Low-quality     | Genome-fragment | NA | 0.77  | 0    |
| S4_extracted_31525          | 1336  | No  | NA    | 5  | 0 | Low-quality     | Genome-fragment | NA | 4.41  | 0    |
| S8_vs_k141_55239  full      | 1336  | No  | NA    | 0  | 2 | Low-quality     | Genome-fragment | NA | 0.5   | 0    |
| S17_vs_k141_160861  full    | 1337  | No  | NA    | 0  | 1 | Low-quality     | Genome-fragment | NA | 0.82  | 0    |
| S9_extracted_k141_54700     | 1337  | No  | NA    | 0  | 0 | Low-quality     | Genome-fragment | NA | 0.77  | 0    |
| S11_vs_k141_2151  l2genome  | 1337  | No  | NA    | 1  | 0 | Low-quality     | Genome-fragment | NA | 0.92  | 0    |
| S14_extracted_k141_1975     | 2474  | No  | NA    | 0  | 0 | Not-determined  | Genome-fragment | NA | 0     | 0    |
| S14_extracted_k141_63009    | 1016  | No  | NA    | 0  | 1 | Not-determined  | Genome-fragment | NA | 0     | 0    |
| S11_vs_k141_32115  l2genome | 1337  | No  | NA    | 1  | 0 | Low-quality     | Genome-fragment | NA | 2.65  | 0    |
| S14_vs_k141_85880  full     | 1337  | No  | NA    | 0  | 0 | Low-quality     | Genome-fragment | NA | 0.77  | 0    |
| S14_vs_k141_100233  full    | 1337  | No  | NA    | 0  | 1 | Low-quality     | Genome-fragment | NA | 2.7   | 0    |
| S3_vs_k141_98361  full      | 1337  | No  | NA    | 2  | 0 | Low-quality     | Genome-fragment | NA | 3.3   | 0    |
| S14_extracted_k141_7818     | 6813  | No  | NA    | 0  | 3 | Not-determined  | Genome-fragment | NA | 0     | 0    |
| S14_extracted_k141_99647    | 1903  | No  | NA    | 0  | 0 | Not-determined  | Genome-fragment | NA | 0     | 0    |
| S7_extracted_78555          | 1337  | No  | NA    | 0  | 0 | Low-quality     | Genome-fragment | NA | 4.37  | 0    |
| S14_extracted_k141_70715    | 1256  | No  | NA    | 0  | 1 | Not-determined  | Genome-fragment | NA | 0     | 0    |
| S14_extracted_k141_85442    | 6385  | No  | NA    | 0  | 1 | Not-determined  | Genome-fragment | NA | 0     | 0    |
| S7_vs_62064  full           | 1337  | No  | NA    | 0  | 2 | Low-quality     | Genome-fragment | NA | 0.5   | 0    |
| S14_extracted_k141_107595   | 1089  | No  | NA    | 0  | 0 | Not-determined  | Genome-fragment | NA | 0     | 0    |
| S14_extracted_k141_3984     | 2098  | No  | NA    | 0  | 0 | Not-determined  | Genome-fragment | NA | 0     | 0    |
| S14_extracted_k141_78159    | 5948  | Yes | 50221 | 30 | 0 | High-quality    | Genome-fragment | NA | 93.75 | 6.91 |
| S7_vs_131218  full          | 1337  | No  | NA    | 1  | 0 | Low-quality     | Genome-fragment | NA | 3.1   | 0    |
| S14_extracted_k141_39974    | 1620  | No  | NA    | 0  | 1 | Not-determined  | Genome-fragment | NA | 0.63  | 0    |
| S16_vs_15403  full          | 1337  | No  | NA    | 0  | 1 | Low-quality     | Genome-fragment | NA | 0.63  | 0    |
| S16_vs_96575  full          | 1337  | No  | NA    | 0  | 1 | Low-quality     | Genome-fragment | NA | 0.92  | 0    |
| S10_vs_38501  full          | 1337  | No  | NA    | 0  | 0 | Low-quality     | Genome-fragment | NA | 1.51  | 0    |
| S12_extracted_k141_14063    | 1337  | No  | NA    | 0  | 0 | Low-quality     | Genome-fragment | NA | 2.68  | 0    |
| S6_extracted_k141_48550     | 1337  | No  | NA    | 1  | 0 | Low-quality     | Genome-fragment | NA | 3.4   | 0    |
| S14_extracted_k141_19914    | 1145  | No  | NA    | 0  | 1 | Not-determined  | Genome-fragment | NA | 0     | 0    |
| S14_extracted_k141_107712   | 3196  | No  | NA    | 0  | 2 | Not-determined  | Genome-fragment | NA | 0     | 0    |
| S14_extracted_k141_19928    | 1194  | No  | NA    | 0  | 0 | Not-determined  | Genome-fragment | NA | 0     | 0    |
| S14_extracted_k141_107723   | 1689  | No  | NA    | 0  | 2 | Not-determined  | Genome-fragment | NA | 0     | 0    |
| S14_extracted_k141_81595    | 1321  | No  | NA    | 0  | 1 | Not-determined  | Genome-fragment | NA | 0     | 0    |
| S8_vs_k141_134666  full     | 1337  | No  | NA    | 0  | 0 | Low-quality     | Genome-fragment | NA | 2.69  | 0    |
| S14_extracted_k141_56130    | 1337  | No  | NA    | 0  | 0 | Low-quality     | Genome-fragment | NA | 3.53  | 0    |
| S9_extracted_k141_80583     | 46683 | No  | NA    | 31 | 0 | High-quality    | High-quality    | NA | 100   | 0    |
| S11_vs_k141_93031  full     | 1338  | No  | NA    | 0  | 0 | Genome-fragment | Genome-fragment | NA | 2.05  | 0    |
| S14_extracted_k141_41930    | 1338  | No  | NA    | 0  | 0 | Low-quality     | Genome-fragment | NA | 3.81  | 0    |
| S12_vs_8881  full           | 1121  | No  | NA    | 0  | 1 | Not-determined  | Genome-fragment | NA | 0     | 0    |
| S14_extracted_k141_93078    | 1338  | No  | NA    | 0  | 2 | Low-quality     | Genome-fragment | NA | 0.47  | 0    |
| S13_vs_8915  full           | 7888  | No  | NA    | 0  | 4 | Not-determined  | Genome-fragment | NA | 0     | 0    |
| S14_extracted_k141_41984    | 1338  | No  | NA    | 0  | 2 | Low-quality     | Genome-fragment | NA | 2.09  | 0    |
| S14_extracted_k141_53134    | 3037  | No  | NA    | 0  | 1 | Not-determined  | Genome-fragment | NA | 0     | 0    |
| S14_extracted_k141_107789   | 15540 | No  | NA    | 0  | 0 | Medium-quality  | Genome-fragment | NA | 65.86 | 0    |
| S3_vs_k141_107789           | 1050  | No  | NA    | 0  | 1 | Not-determined  | Genome-fragment | NA | 0     | 0    |
| S3_vs_k141_12528  full      | 1338  | No  | NA    | 0  | 0 | Low-quality     | Genome-fragment | NA | 2.63  | 0    |
| S14_extracted_k141_56170    | 1858  | No  | NA    | 0  | 1 | Not-determined  | Genome-fragment | NA | 0     | 0    |
| S14_extracted_k141_114964   | 4653  | No  | NA    | 0  | 3 | Not-determined  | Genome-fragment | NA | 0     | 0    |
| S14_extracted_k141_99815    | 1208  | No  | NA    | 0  | 1 | Not-determined  | Genome-fragment | NA | 0     | 0    |
| S7_vs_32732  full           | 1338  | No  | NA    | 0  | 0 | Low-quality     | Genome-fragment | NA | 2.33  | 0    |
| S7_vs_69133  full           | 1338  | No  | NA    | 1  | 0 | Low-quality     | Genome-fragment | NA | 3.55  | 0    |
| S14_extracted_k141_85720    | 1145  | No  | NA    | 0  | 2 | Not-determined  | Genome-fragment | NA | 0     | 0    |
| S14_extracted_k141_114981   | 1084  | No  | NA    | 0  | 0 | Not-determined  | Genome-fragment | NA | 0     | 0    |
| S7_vs_109890  full          | 1338  | No  | NA    | 0  | 0 | Low-quality     | Genome-fragment | NA | 3.32  | 0    |
| S14_extracted_k141_42063    | 1068  | No  | NA    | 0  | 2 | Not-determined  | Genome-fragment | NA | 0     | 0    |
| S7_vs_92612  l2genome       | 1338  | No  | NA    | 0  | 1 | Low-quality     | Genome-fragment | NA | 1.57  | 0    |
| S14_extracted_k141_99886    | 1949  | No  | NA    | 0  | 0 | Not-determined  | Genome-fragment | NA | 0     | 0    |
| S14_extracted_k141_48325    | 1005  | No  | NA    | 0  | 0 | Not-determined  | Genome-fragment | NA | 0     | 0    |
| S14_extracted_k141_4834     | 1303  | No  | NA    | 0  | 0 | Not-determined  | Genome-fragment | NA | 0     | 0    |
| S14_extracted_k141_34150    | 1752  | No  | NA    | 0  | 0 | Not-determined  | Genome-fragment | NA | 0     | 0    |
| S16_extracted_118634        | 1338  | No  | NA    | 0  | 0 | Low-quality     | Genome-fragment | NA | 2.19  | 0    |
| S8_extracted_k141_63621     | 1338  | No  | NA    | 0  | 0 | Low-quality     | Genome-fragment | NA | 2.09  | 0    |
| S14_extracted_k141_78302    | 1100  | No  | NA    | 0  | 1 | Not-determined  | Genome-fragment | NA | 0     | 0    |
| S14_extracted_k141_36450    | 1007  | No  | NA    | 0  | 1 | Not-determined  | Genome-fragment | NA | 0     | 0    |
| S8_vs_k141_192648  full     | 1338  | No  | NA    | 1  | 0 | Low-quality     | Genome-fragment | NA | 3.08  | 0    |
| S14_extracted_k141_93264    | 1062  | No  | NA    | 0  | 1 | Not-determined  | Genome-fragment | NA | 0     | 0    |
| S17_vs_k141_141040  full    | 1339  | No  | NA    | 0  | 0 | Low-quality     | Genome-fragment | NA | 1.12  | 0    |
| S14_extracted_k141_93279    | 4544  | No  | NA    | 0  | 3 | Not-determined  | Genome-fragment | NA | 0     | 0    |
| S14_extracted_k141_115093   | 1428  | No  | NA    | 0  | 0 | Not-determined  | Genome-fragment | NA | 0     | 0    |
| S14_extracted_k141_107911   | 1127  | No  | NA    | 0  | 1 | Not-determined  | Genome-fragment | NA | 0     | 0    |
| S9_vs_k141_25426  full      | 1339  | No  | NA    | 0  | 0 | Low-quality     | Genome-fragment | NA | 1.79  | 0    |
| S14_extracted_k141_107934   | 1571  | No  | NA    | 0  | 2 | Not-determined  | Genome-fragment | NA | 0     | 0    |
| S11_extracted_k141_10599    | 1339  | No  | NA    | 1  | 0 | Low-quality     | Genome-fragment | NA | 2.85  | 0    |
| S1_vs_k141_11666  full      | 1339  | No  | NA    | 0  | 0 | Low-quality     | Genome-fragment | NA | 2.31  | 0    |
| S1_vs_k141_149452  l2genome | 1339  | No  | NA    | 1  | 0 | Low-quality     | Genome-fragment | NA | 1.75  | 0    |
| S5_vs_k141_36404  full      | 1339  | No  | NA    | 0  | 0 | Low-quality     | Genome-fragment | NA | 3.09  | 0    |
| S14_extracted_k141_115149   | 3662  | No  | NA    | 0  | 0 | Not-determined  | Genome-fragment | NA | 0     | 0    |
| S14_extracted_k141_78441    | 1053  | No  | NA    | 0  | 1 | Not-determined  | Genome-fragment | NA | 0     | 0    |
| S14_extracted_k141_4942     | 2893  | No  | NA    | 0  | 0 | Not-determined  | Genome-fragment | NA | 0     | 0    |
| S7_vs_118201  full          | 1239  | No  | NA    | 0  | 0 | Low-quality     | Genome-fragment | NA | 3.33  | 0    |
| S14_extracted_k141_34309    | 1042  | No  | NA    | 0  | 2 | Not-determined  | Genome-fragment | NA | 0     | 0    |
| S14_extracted_k141_78486    | 1234  | No  | NA    | 0  | 2 | Not-determined  | Genome-fragment | NA | 0     | 0    |
| S14_extracted_k141_48453    | 8837  | No  | NA    | 0  | 1 | Not-determined  | Genome-fragment | NA | 0     | 0    |
| S10_extracted_31872         | 1339  | No  | NA    | 0  | 0 | Low-quality     | Genome-fragment | NA | 1.33  | 0    |
| S10_extracted_85362         | 1339  | No  | NA    | 0  | 0 | Low-quality     | Genome-fragment | NA | 3.06  | 0    |
| S15_extracted_43484         | 1339  | No  | NA    | 1  | 0 | Low-quality     | Genome-fragment | NA | 3.38  | 0    |
| S17_extracted_k141_13026    | 1340  | No  | NA    | 0  | 1 | Low-quality     | Genome-fragment | NA | 9.57  | 0    |
| S17_vs_k141_47490  full     | 1340  | No  | NA    | 1  | 0 | Low-quality     | Genome-fragment | NA | 1.2   | 0    |
| S14_extracted_k141_56439    | 4059  | No  | NA    | 0  | 1 | Not-determined  | Genome-fragment | NA | 0     | 0    |
| S14_extracted_k141_71091    | 1201  | No  | NA    | 0  | 1 | Not-determined  | Genome-fragment | NA | 0     | 0    |
| S14_extracted_k141_71106    | 1150  | No  | NA    | 0  | 1 | Not-determined  | Genome-fragment | NA | 0     | 0    |
| S14_extracted_k141_63590    | 1190  | No  | NA    | 0  | 3 | Not-determined  | Genome-fragment | NA | 0     | 0    |
| S9_vs_k141_17873  full      | 1340  | No  | NA    | 0  | 0 | Low-quality     | Genome-fragment | NA | 3.65  | 0    |
| S11_vs_k141_91800  l2genome | 1340  | No  | NA    | 2  | 0 | Low-quality     | Genome-fragment | NA | 3.29  | 0    |
| S14_extracted_k141_115269   | 2062  | No  | NA    | 0  | 1 | Not-determined  | Genome-fragment | NA | 0     | 0    |
| S14_extracted_k141_100223   | 1091  | No  | NA    | 0  | 1 | Not-determined  | Genome-fragment | NA | 0     | 0    |
| S14_extracted_k141_36627    | 1319  | No  | NA    | 0  | 1 | Not-determined  | Genome-fragment | NA | 0     | 0    |
| S14_extracted_k141_31947    | 1340  | No  | NA    | 4  | 0 | Low-quality     | Genome-fragment | NA | 4.42  | 0    |
| S14_extracted_k141_63633    | 1090  | No  | NA    | 0  | 1 | Not-determined  | Genome-fragment | NA | 0     | 0    |
| S14_extracted_k141_78614    | 1219  | No  | NA    | 0  | 1 | Not-determined  |                 |    |       |      |



|                           |       |    |    |    |   |                |                 |       |   |
|---------------------------|-------|----|----|----|---|----------------|-----------------|-------|---|
| S11_vs_k141_42928  H2gene | 1341  | No | NA | 1  | 0 | Low-quality    | Genome-fragment | 3.26  | 0 |
| S3_extracted_k141_58222   | 1341  | No | NA | 2  | 0 | Low-quality    | Genome-fragment | 3.88  | 0 |
| S14_extracted_k141_115516 | 1430  | No | NA | 0  | 1 | Not-determined | Genome-fragment | NA    | 0 |
| S14_extracted_k141_71465  | 1069  | No | NA | 0  | 1 | Not-determined | Genome-fragment | NA    | 0 |
| S14_extracted_k141_34850  | 3283  | No | NA | 0  | 1 | Not-determined | Genome-fragment | NA    | 0 |
| S5_vs_k141_51996  full    | 1341  | No | NA | 1  | 0 | Low-quality    | Genome-fragment | 2.39  | 0 |
| S7_extracted_87481        | 1341  | No | NA | 3  | 0 | Low-quality    | Genome-fragment | 6.12  | 0 |
| S14_extracted_k141_100571 | 1365  | No | NA | 0  | 1 | Not-determined | Genome-fragment | NA    | 0 |
| S7_vs_23402  full         | 1341  | No | NA | 1  | 1 | Low-quality    | Genome-fragment | 1.35  | 0 |
| S16_vs_29714  full        | 1341  | No | NA | 0  | 0 | Low-quality    | Genome-fragment | 3.19  | 0 |
| S14_extracted_k141_48853  | 1161  | No | NA | 0  | 0 | Not-determined | Genome-fragment | NA    | 0 |
| S14_extracted_k141_12710  | 1195  | No | NA | 0  | 1 | Not-determined | Genome-fragment | NA    | 0 |
| S14_extracted_k141_48872  | 1260  | No | NA | 0  | 0 | Not-determined | Genome-fragment | NA    | 0 |
| S16_vs_158116  H2gene     | 1341  | No | NA | 1  | 0 | Low-quality    | Genome-fragment | 3.09  | 0 |
| S10_vs_51114  full        | 1341  | No | NA | 0  | 0 | Low-quality    | Genome-fragment | 1.01  | 0 |
| S14_extracted_k141_108397 | 1844  | No | NA | 0  | 1 | Not-determined | Genome-fragment | NA    | 0 |
| S10_vs_69176  full        | 1341  | No | NA | 0  | 0 | Low-quality    | Genome-fragment | 3.1   | 0 |
| S12_extracted_k141_34967  | 5414  | No | NA | 0  | 5 | Not-determined | Genome-fragment | NA    | 0 |
| S12_extracted_k141_103293 | 1341  | No | NA | 0  | 2 | Low-quality    | Genome-fragment | 0.43  | 0 |
| S12_extracted_k141_5094   | 1341  | No | NA | 0  | 0 | Low-quality    | Genome-fragment | 3.15  | 0 |
| S12_vs_k141_63255  full   | 1341  | No | NA | 0  | 2 | Low-quality    | Genome-fragment | 1.11  | 0 |
| S14_extracted_k141_10456  | 1028  | No | NA | 0  | 0 | Not-determined | Genome-fragment | NA    | 0 |
| S14_extracted_k141_78836  | 1257  | No | NA | 0  | 1 | Not-determined | Genome-fragment | NA    | 0 |
| S14_extracted_k141_71669  | 1535  | No | NA | 0  | 2 | Not-determined | Genome-fragment | NA    | 0 |
| S14_extracted_k141_12895  | 1098  | No | NA | 0  | 0 | Not-determined | Genome-fragment | NA    | 0 |
| S14_extracted_k141_49049  | 1462  | No | NA | 0  | 2 | Not-determined | Genome-fragment | NA    | 0 |
| S14_extracted_k141_71686  | 1284  | No | NA | 0  | 0 | Not-determined | Genome-fragment | NA    | 0 |
| S14_extracted_k141_78877  | 1267  | No | NA | 0  | 1 | Not-determined | Genome-fragment | NA    | 0 |
| S14_extracted_k141_10304  | 1651  | No | NA | 0  | 1 | Not-determined | Genome-fragment | NA    | 0 |
| S14_extracted_k141_64096  | 1046  | No | NA | 0  | 2 | Not-determined | Genome-fragment | NA    | 0 |
| S12_vs_k141_171775  full  | 1341  | No | NA | 0  | 0 | Low-quality    | Genome-fragment | 2.52  | 0 |
| S15_extracted_55764       | 1341  | No | NA | 0  | 0 | Low-quality    | Genome-fragment | 2.18  | 0 |
| S14_extracted_k141_108556 | 3793  | No | NA | 0  | 2 | Not-determined | Genome-fragment | NA    | 0 |
| S14_extracted_k141_12989  | 1655  | No | NA | 0  | 0 | Not-determined | Genome-fragment | NA    | 0 |
| S17_extracted_k141_38485  | 1342  | No | NA | 0  | 0 | Low-quality    | Genome-fragment | 0.88  | 0 |
| S14_extracted_k141_86483  | 5439  | No | NA | 0  | 1 | Not-determined | Genome-fragment | NA    | 0 |
| S14_extracted_k141_115736 | 42416 | No | NA | 19 | 0 | Complete       | High-quality    | 100   | 0 |
| S14_extracted_k141_27277  | 2083  | No | NA | 0  | 3 | Not-determined | Genome-fragment | NA    | 0 |
| S14_extracted_k141_5570   | 1063  | No | NA | 1  | 1 | Not-determined | Genome-fragment | NA    | 0 |
| S14_extracted_k141_13035  | 4885  | No | NA | 0  | 3 | Not-determined | Genome-fragment | NA    | 0 |
| S9_vs_k141_23350  full    | 1342  | No | NA | 1  | 0 | Low-quality    | Genome-fragment | 2.76  | 0 |
| S14_extracted_k141_43182  | 1458  | No | NA | 0  | 0 | Not-determined | Genome-fragment | NA    | 0 |
| S14_extracted_k141_108632 | 1202  | No | NA | 0  | 1 | Not-determined | Genome-fragment | NA    | 0 |
| S11_vs_k141_7711  full    | 1342  | No | NA | 1  | 0 | Low-quality    | Genome-fragment | 3.25  | 0 |
| S14_extracted_k141_43184  | 1096  | No | NA | 0  | 0 | Not-determined | Genome-fragment | NA    | 0 |
| S14_extracted_k141_108648 | 1630  | No | NA | 0  | 1 | Not-determined | Genome-fragment | NA    | 0 |
| S14_extracted_k141_78958  | 2157  | No | NA | 0  | 1 | Not-determined | Genome-fragment | NA    | 0 |
| S14_extracted_k141_20684  | 6711  | No | NA | 0  | 2 | Not-determined | Genome-fragment | NA    | 0 |
| S14_extracted_k141_20684  | 4549  | No | NA | 0  | 1 | Not-determined | Genome-fragment | NA    | 0 |
| S14_extracted_k141_108686 | 3267  | No | NA | 0  | 3 | Not-determined | Genome-fragment | NA    | 0 |
| S14_extracted_k141_71887  | 3669  | No | NA | 0  | 2 | Not-determined | Genome-fragment | NA    | 0 |
| S12_vs_142548  full       | 1342  | No | NA | 0  | 1 | Low-quality    | Genome-fragment | 1.67  | 0 |
| S14_extracted_k141_43235  | 1092  | No | NA | 0  | 1 | Not-determined | Genome-fragment | NA    | 0 |
| S14_extracted_k141_49103  | 1793  | No | NA | 0  | 0 | Not-determined | Genome-fragment | NA    | 0 |
| S14_extracted_k141_78989  | 1241  | No | NA | 0  | 1 | Not-determined | Genome-fragment | NA    | 0 |
| S14_extracted_k141_77051  | 1211  | No | NA | 0  | 0 | Not-determined | Genome-fragment | NA    | 0 |
| S14_extracted_k141_100082 | 1342  | No | NA | 2  | 0 | Low-quality    | Genome-fragment | 0.73  | 0 |
| S14_extracted_k141_64220  | 8991  | No | NA | 0  | 2 | Not-determined | Genome-fragment | NA    | 0 |
| S14_extracted_k141_49155  | 1359  | No | NA | 0  | 1 | Not-determined | Genome-fragment | NA    | 0 |
| S4_extracted_7231         | 1342  | No | NA | 0  | 0 | Low-quality    | Genome-fragment | 3.44  | 0 |
| S14_extracted_k141_108837 | 1081  | No | NA | 0  | 0 | Not-determined | Genome-fragment | NA    | 0 |
| S14_extracted_k141_5774   | 1041  | No | NA | 0  | 0 | Not-determined | Genome-fragment | NA    | 0 |
| S14_extracted_k141_108851 | 1141  | No | NA | 0  | 1 | Not-determined | Genome-fragment | NA    | 0 |
| S8_vs_k141_185532  full   | 1342  | No | NA | 0  | 0 | Low-quality    | Genome-fragment | 1.4   | 0 |
| S14_extracted_k141_5788   | 1163  | No | NA | 0  | 1 | Not-determined | Genome-fragment | NA    | 0 |
| S9_vs_k141_18480  H2gene  | 1343  | No | NA | 2  | 0 | Low-quality    | Genome-fragment | 3.77  | 0 |
| S13_vs_139321  full       | 1343  | No | NA | 0  | 1 | Low-quality    | Genome-fragment | 3.03  | 0 |
| S1_vs_k141_27995  full    | 1343  | No | NA | 0  | 0 | Low-quality    | Genome-fragment | 2.7   | 0 |
| S14_extracted_k141_43340  | 6047  | No | NA | 1  | 0 | High-quality   | High-quality    | 97.55 | 0 |
| S14_extracted_k141_101065 | 1069  | No | NA | 0  | 2 | Not-determined | Genome-fragment | NA    | 0 |
| S14_extracted_k141_64288  | 1654  | No | NA | 0  | 1 | Not-determined | Genome-fragment | NA    | 0 |
| S14_extracted_k141_79107  | 1583  | No | NA | 0  | 1 | Not-determined | Genome-fragment | NA    | 0 |
| S3_extracted_k141_112626  | 1343  | No | NA | 1  | 0 | Low-quality    | Genome-fragment | 0.96  | 0 |
| S3_vs_k141_110122  full   | 1343  | No | NA | 3  | 0 | Low-quality    | Genome-fragment | 3.24  | 0 |
| S14_extracted_k141_25347  | 1355  | No | NA | 0  | 1 | Not-determined | Genome-fragment | NA    | 0 |
| S14_extracted_k141_57142  | 1397  | No | NA | 0  | 0 | Not-determined | Genome-fragment | NA    | 0 |
| S14_extracted_k141_79124  | 5693  | No | NA | 0  | 4 | Not-determined | Genome-fragment | NA    | 0 |
| S14_extracted_k141_13197  | 1234  | No | NA | 0  | 1 | Not-determined | Genome-fragment | NA    | 0 |
| S14_extracted_k141_5843   | 1182  | No | NA | 0  | 1 | Not-determined | Genome-fragment | NA    | 0 |
| S14_extracted_k141_108936 | 1454  | No | NA | 0  | 1 | Not-determined | Genome-fragment | NA    | 0 |
| S14_extracted_k141_35366  | 1363  | No | NA | 0  | 2 | Not-determined | Genome-fragment | NA    | 0 |
| S5_extracted_k141_49886   | 1343  | No | NA | 0  | 0 | Low-quality    | Genome-fragment | 3.35  | 0 |
| S7_vs_73531  full         | 1343  | No | NA | 1  | 0 | Low-quality    | Genome-fragment | 2.75  | 0 |
| S14_extracted_k141_5869   | 1100  | No | NA | 0  | 2 | Not-determined | Genome-fragment | NA    | 0 |
| S14_extracted_k141_27638  | 1211  | No | NA | 0  | 0 | Not-determined | Genome-fragment | NA    | 0 |
| S14_extracted_k141_79177  | 1524  | No | NA | 0  | 1 | Not-determined | Genome-fragment | NA    | 0 |
| S7_vs_130683  H2gene      | 1343  | No | NA | 2  | 0 | Low-quality    | Genome-fragment | 3.61  | 0 |
| S16_extracted_120016      | 1343  | No | NA | 1  | 0 | Low-quality    | Genome-fragment | 0.54  | 0 |
| S14_extracted_k141_16870  | 7486  | No | NA | 0  | 4 | Not-determined | Genome-fragment | NA    | 0 |
| S14_extracted_k141_57240  | 2280  | No | NA | 0  | 0 | Not-determined | Genome-fragment | NA    | 0 |
| S16_vs_111582  full       | 1343  | No | NA | 0  | 0 | Low-quality    | Genome-fragment | 3.06  | 0 |
| S12_vs_k141_152211  full  | 1343  | No | NA | 0  | 0 | Low-quality    | Genome-fragment | 3.34  | 0 |
| S8_vs_k141_161771  full   | 1343  | No | NA | 0  | 0 | Low-quality    | Genome-fragment | NA    | 0 |
| S14_extracted_k141_86942  | 1043  | No | NA | 0  | 0 | Not-determined | Genome-fragment | NA    | 0 |
| S14_extracted_k141_21002  | 2712  | No | NA | 0  | 0 | Not-determined | Genome-fragment | NA    | 0 |
| S17_vs_k141_81020  full   | 1344  | No | NA | 0  | 0 | Low-quality    | Genome-fragment | 2.51  | 0 |
| S14_extracted_k141_101201 | 1073  | No | NA | 0  | 1 | Not-determined | Genome-fragment | NA    | 0 |
| S9_vs_k141_20008  full    | 1344  | No | NA | 0  | 3 | Low-quality    | Genome-fragment | 0.73  | 0 |
| S14_extracted_k141_79275  | 3188  | No | NA | 0  | 1 | Not-determined | Genome-fragment | NA    | 0 |
| S9_vs_k141_83160  H2gene  | 1344  | No | NA | 1  | 0 | Low-quality    | Genome-fragment | 2.93  | 0 |
| S14_extracted_k141_79278  | 1497  | No | NA | 0  | 0 | Not-determined | Genome-fragment | NA    | 0 |
| S14_extracted_k141_27715  | 3868  | No | NA | 0  | 2 | Not-determined | Genome-fragment | NA    | 0 |
| S14_extracted_k141_101223 | 3346  | No | NA | 0  | 2 | Not-determined | Genome-fragment | NA    | 0 |
| S11_vs_k141_65792  full   | 1344  | No | NA | 0  | 0 | Low-quality    | Genome-fragment | 1.92  | 0 |
| S14_extracted_k141_109060 | 1217  | No | NA | 0  | 1 | Not-determined | Genome-fragment | NA    | 0 |
| S14_extracted_k141_87043  | 3019  | No | NA | 0  | 2 | Not-determined | Genome-fragment | NA    | 0 |
| S14_extracted_k141_79335  | 2684  | No | NA | 0  | 0 | Not-determined | Genome-fragment | NA    | 0 |
| S14_extracted_k141_64390  | 1172  | No | NA | 0  | 0 | Not-determined | Genome-fragment | NA    | 0 |
| S14_extracted_k141_72101  | 2953  | No | NA | 0  | 1 | Not-determined | Genome-fragment | NA    | 0 |
| S14_extracted_k141_94537  | 1609  | No | NA | 0  | 4 | Not-determined | Genome-fragment | NA    | 0 |
| S14_extracted_k141_94547  | 2351  | No | NA | 0  | 0 | Not-determined | Genome-fragment | NA    | 0 |
| S14_extracted_k141_35619  | 1138  | No | NA | 0  | 1 | Not-determined | Genome-fragment | NA    | 0 |
| S13_vs_129291  full       | 1344  | No | NA | 0  | 0 | Low-quality    | Genome-fragment | 2.16  | 0 |
| S14_extracted_k141_94568  | 1483  | No | NA | 0  | 1 | Not-determined | Genome-fragment | NA    | 0 |
| S1_extracted_k141_150898  | 1344  | No | NA | 0  | 1 | Low-quality    | Genome-fragment | 1.97  | 0 |
| S3_extracted_k141_46539   | 1344  | No | NA | 2  | 0 | Low-quality    | Genome-fragment | 26.13 | 0 |
| S14_extracted_k141_64419  | 1364  | No | NA | 0  | 1 | Not-determined | Genome-fragment | NA    | 0 |
| S12_vs_k141_23265  full   | 1344  | No | NA | 0  | 0 | Low-quality    | Genome-fragment | 1.99  | 0 |
| S14_extracted_k141_64425  | 1142  | No | NA | 0  | 0 | Not-determined | Genome-fragment | NA    | 0 |
| S5_extracted_k141_111068  | 1344  | No | NA | 0  | 0 | Low-quality    | Genome-fragment | 1.02  | 0 |
| S14_extracted_k141_94602  | 4564  | No | NA | 0  | 3 | Not-determined | Genome-fragment | NA    | 0 |
| S14_extracted_k141_61137  | 1657  | No | NA | 0  | 1 | Not-determined | Genome-fragment | NA    | 0 |
| S5_vs_k141_70073  full    | 1344  | No | NA | 0  | 0 | Low-quality    | Genome-fragment | 2.1   | 0 |
| S14_extracted_k141_101376 | 1167  | No | NA | 0  | 0 | Not-determined | Genome-fragment | NA    | 0 |
| S14_extracted_k141_57452  | 1045  | No | NA | 0  | 1 | Not-determined | Genome-fragment | NA    | 0 |
| S7_vs_18238  H2gene       | 1344  | No | NA | 2  | 0 | Low-quality    | Genome-fragment | 3.08  | 0 |
| S14_extracted_k141_27933  | 3495  | No | NA | 0  | 2 | Not-determined | Genome-fragment | NA    | 0 |
| S14_extracted_k141_49689  | 2605  | No | NA | 0  | 1 | Not-determined | Genome-fragment | NA    | 0 |
| S12_vs_k141_166953  full  | 1344  | No | NA | 0  | 0 | Low-quality    | Genome-fragment | 0.9   | 0 |
| S17_extracted_k141_38287  | 1345  | No | NA | 0  | 1 | Low-quality    | Genome-fragment | 1.2   | 0 |
| S11_extracted_k141_73665  | 1345  | No | NA | 0  | 0 | Low-quality    | Genome-fragment | 2.36  | 0 |
| S11_extracted_k141_6904   | 1345  | No | NA | 0  | 0 | Low-quality    | Genome-fragment | 1.29  | 0 |
| S14_extracted_k141_94719  | 1179  | No | NA | 0  | 1 | Not-determined | Genome-fragment | NA    | 0 |
| S14_extracted_k141_13495  | 1471  | No | NA | 0  | 1 | Not-determined | Genome-fragment | NA    | 0 |
| S14_extracted_k141_72253  | 3055  | No | NA | 0  | 2 | Not-determined | Genome-fragment | NA    | 0 |
| S14_extracted_k141_87276  | 1015  | No | NA | 0  | 1 | Not-determined | Genome-fragment | NA    | 0 |
| S14_extracted_k141_94750  | 1396  | No | NA | 0  | 0 | Not-determined | Genome-fragment | NA    | 0 |
| S14_extracted_k141_43787  | 1242  | No | NA | 0  | 2 | Not-determined | Genome-fragment | NA    | 0 |
| S14_extracted_k141_21265  | 1028  | No | NA | 0  | 0 | Not-determined | Genome-fragment | NA    | 0 |
| S14_extracted_k141_35829  | 20156 | No | NA | 0  | 4 | Not-determined | Genome-fragment | NA    | 0 |
| S7_vs_134439  full        | 1345  | No | NA | 0  | 0 | Low-quality    | Genome-fragment | 3.72  | 0 |
| S12_extracted_k141_150016 | 1345  | No | NA | 0  | 1 | Low-quality    | Genome-fragment | 3.05  | 0 |
| S14_extracted_k141_57629  | 1299  | No | NA | 0  | 0 | Not-determined | Genome-fragment | NA    | 0 |
| S12_extracted_k141_159644 | 1345  | No | NA | 0  | 2 | Low-quality    | Genome-fragment | 0.88  | 0 |
| S12_vs_k141_24636  full   | 1345  | No | NA | 0  | 0 | Low-quality    | Genome-fragment | 0.92  | 0 |
| S14_extracted_k141_94800  | 1212  | No | NA | 0  | 0 | Not-determined | Genome-fragment | NA    | 0 |
| S14_extracted_k141_       |       |    |    |    |   |                |                 |       |   |



|                            |        |    |    |   |                |                 |       |       |
|----------------------------|--------|----|----|---|----------------|-----------------|-------|-------|
| S14_extracted_k141_6638    | 1109   | NA | 0  | 2 | Not-determined | Genome-fragment | NA    | 0     |
| S7_extracted_30359         | 1346   | NA | 0  | 0 | Low-quality    | Genome-fragment | NA    | 1.97  |
| S14_extracted_k141_109721  | 5728   | NA | 0  | 4 | Not-determined | Genome-fragment | NA    | 0     |
| S7_extracted_57893         | 1346   | NA | 0  | 0 | Low-quality    | Genome-fragment | NA    | 3.64  |
| S14_extracted_k141_109753  | 1146   | NA | 0  | 0 | Not-determined | Genome-fragment | NA    | 0     |
| S7_vs_k12121[full]         | 1346   | NA | 1  | 0 | Low-quality    | Genome-fragment | NA    | 3.14  |
| S14_extracted_k141_57993   | 1356   | NA | 0  | 0 | Not-determined | Genome-fragment | NA    | 0     |
| S16_extracted_6090         | 1346   | NA | 0  | 0 | Low-quality    | Genome-fragment | NA    | 2.78  |
| S14_extracted_k141_80055   | 1535   | NA | 0  | 0 | Not-determined | Genome-fragment | NA    | 0     |
| S14_extracted_k141_6730    | 1117   | NA | 0  | 1 | Not-determined | Genome-fragment | NA    | 0     |
| S16_vs_51880[ H2gene       | 1346   | NA | 1  | 0 | Low-quality    | Genome-fragment | NA    | 1.78  |
| S14_extracted_k141_101865  | 1972   | NA | 0  | 0 | Not-determined | Genome-fragment | NA    | 0     |
| S14_extracted_k141_6741    | 1156   | NA | 0  | 0 | Not-determined | Genome-fragment | NA    | 0     |
| S10_extracted_46005        | 1346   | NA | 0  | 3 | Low-quality    | Genome-fragment | NA    | 0.96  |
| S14_extracted_k141_109814  | 1065   | NA | 0  | 1 | Not-determined | Genome-fragment | NA    | 0     |
| S14_extracted_k141_109817  | 1648   | NA | 0  | 0 | Not-determined | Genome-fragment | NA    | 0     |
| S14_extracted_k141_80088   | 3610   | NA | 0  | 3 | Not-determined | Genome-fragment | NA    | 0     |
| S10_vs_103886[ full]       | 1346   | NA | 0  | 0 | Low-quality    | Genome-fragment | NA    | 2.54  |
| S12_vs_k141_83422[ full]   | 1346   | NA | 0  | 0 | Low-quality    | Genome-fragment | NA    | 2.6   |
| S14_extracted_k141_101880  | 1950   | NA | 0  | 1 | Not-determined | Genome-fragment | NA    | 0     |
| S6_extracted_k141_27256    | 1346   | NA | 0  | 2 | Low-quality    | Genome-fragment | NA    | 1.14  |
| S17_vs_k141_62665[ full]   | 1347   | NA | 0  | 0 | Low-quality    | Genome-fragment | NA    | 1.86  |
| S11_vs_k141_32282[ full]   | 1347   | NA | 0  | 0 | Low-quality    | Genome-fragment | NA    | 3.09  |
| S14_extracted_k141_116900  | 1114   | NA | 0  | 0 | Not-determined | Genome-fragment | NA    | 0.91  |
| S14_extracted_k141_32599   | 1347   | NA | 1  | 0 | Low-quality    | Genome-fragment | NA    | 3.06  |
| S7_vs_45990[ full]         | 1347   | NA | 0  | 0 | Low-quality    | Genome-fragment | NA    | 0     |
| S14_extracted_k141_116951  | 1672   | NA | 0  | 0 | Not-determined | Genome-fragment | NA    | 0     |
| S14_extracted_k141_36332   | 1858   | NA | 0  | 1 | Not-determined | Genome-fragment | NA    | 0     |
| S14_extracted_k141_11833   | 1896   | NA | 0  | 0 | Not-determined | Genome-fragment | NA    | 0     |
| S16_extracted_22217        | 1347   | NA | 0  | 0 | Low-quality    | Genome-fragment | NA    | 4.2   |
| S14_extracted_k141_50256   | 1864   | NA | 0  | 1 | Not-determined | Genome-fragment | NA    | 0     |
| S10_vs_30902[ H2gene       | 1347   | NA | 0  | 0 | Low-quality    | Genome-fragment | NA    | 3.32  |
| S15_extracted_9761         | 1347   | NA | 1  | 0 | Low-quality    | Genome-fragment | NA    | 0.81  |
| S2_vs_k141_8791[ H2gene    | 1347   | NA | 1  | 0 | Low-quality    | Genome-fragment | NA    | 3.13  |
| S8_extracted_k141_174896   | 1347   | NA | 0  | 0 | Low-quality    | Genome-fragment | NA    | 1.07  |
| S14_extracted_k141_58246   | 2107   | NA | 0  | 0 | Not-determined | Genome-fragment | NA    | 0     |
| S14_extracted_k141_6879    | 1603   | NA | 0  | 0 | Not-determined | Genome-fragment | NA    | 0     |
| S14_extracted_k141_21932   | 3016   | NA | 0  | 1 | Not-determined | Genome-fragment | NA    | 0     |
| S14_extracted_k141_80214   | 3820   | NA | 0  | 2 | Not-determined | Genome-fragment | NA    | 0     |
| S14_extracted_k141_80216   | 1172   | NA | 0  | 1 | Not-determined | Genome-fragment | NA    | 0     |
| S14_extracted_k141_65153   | 3547   | NA | 0  | 1 | Not-determined | Genome-fragment | NA    | 0     |
| S17_extracted_k141_164718  | 1348   | NA | 0  | 0 | Low-quality    | Genome-fragment | NA    | 2.76  |
| S14_extracted_k141_65173   | 1079   | NA | 0  | 0 | Not-determined | Genome-fragment | NA    | 0     |
| S14_extracted_k141_102028  | 1078   | NA | 0  | 0 | Not-determined | Genome-fragment | NA    | 0     |
| S17_vs_k141_78481[ full]   | 1348   | NA | 1  | 0 | Low-quality    | Genome-fragment | NA    | 3.27  |
| S14_extracted_k141_117135  | 1300   | NA | 0  | 0 | Not-determined | Genome-fragment | NA    | 0     |
| S14_extracted_k141_14179   | 5264   | NA | 0  | 2 | Not-determined | Genome-fragment | NA    | 0     |
| S14_extracted_k141_58353   | 2968   | NA | 0  | 1 | Not-determined | Genome-fragment | NA    | 0     |
| S2_vs_k141_94201[ full]    | 1348   | NA | 0  | 0 | Low-quality    | Genome-fragment | NA    | 2.39  |
| S14_extracted_k141_28518   | 1041   | NA | 0  | 2 | Not-determined | Genome-fragment | NA    | 0     |
| S11_vs_k141_799951[ H2gene | 1348   | NA | 2  | 0 | Low-quality    | Genome-fragment | NA    | 3.51  |
| S1_vs_k141_486555[ H2gene  | 1348   | NA | 1  | 0 | Low-quality    | Genome-fragment | NA    | 3.32  |
| S14_extracted_k141_117147  | 35338  | NA | 16 | 0 | Complete       | High-quality    | 100   | 0     |
| S7_vs_127316[ full]        | 1348   | NA | 0  | 0 | Low-quality    | Genome-fragment | NA    | 0.77  |
| S16_extracted_45096        | 1348   | NA | 1  | 0 | Low-quality    | Genome-fragment | NA    | 3.35  |
| S14_extracted_k141_72909   | 2652   | NA | 0  | 0 | Not-determined | Genome-fragment | NA    | 0     |
| S16_vs_37694[ full]        | 1348   | NA | 1  | 0 | Low-quality    | Genome-fragment | NA    | 0.8   |
| S6_extracted_k141_27934    | 1348   | NA | 0  | 0 | Low-quality    | Genome-fragment | NA    | 1.74  |
| S14_extracted_k141_28591   | 1454   | NA | 0  | 1 | Not-determined | Genome-fragment | NA    | 0     |
| S14_extracted_k141_102190  | 1204   | NA | 0  | 1 | Not-determined | Genome-fragment | NA    | 0     |
| S14_extracted_k141_7100    | 1141   | NA | 0  | 1 | Not-determined | Genome-fragment | NA    | 0     |
| S14_extracted_k141_117150  | 39147  | NA | 17 | 1 | Complete       | High-quality    | 100   | 0     |
| S17_vs_k141_3366[ full]    | 1349   | NA | 0  | 0 | Low-quality    | Genome-fragment | NA    | 0.97  |
| S14_extracted_k141_72993   | 38044  | NA | 26 | 1 | High-quality   | High-quality    | 98.41 | 0     |
| S14_extracted_k141_50595   | 1169   | NA | 0  | 0 | Not-determined | Genome-fragment | NA    | 0     |
| S14_extracted_k141_72990   | 1011   | NA | 0  | 0 | Not-determined | Genome-fragment | NA    | 0     |
| S14_extracted_k141_58520   | 1186   | NA | 0  | 0 | Not-determined | Genome-fragment | NA    | 0     |
| S14_extracted_k141_65481   | 3366   | NA | 0  | 0 | Not-determined | Genome-fragment | NA    | 0     |
| S14_extracted_k141_38683   | 1962   | NA | 0  | 0 | Not-determined | Genome-fragment | NA    | 0     |
| S14_extracted_k141_73050   | 1158   | NA | 0  | 0 | Not-determined | Genome-fragment | NA    | 0     |
| S14_extracted_k141_80473   | 1865   | NA | 0  | 1 | Not-determined | Genome-fragment | NA    | 0     |
| S14_extracted_k141_7263    | 5959   | NA | 0  | 1 | Not-determined | Genome-fragment | NA    | 0     |
| S14_extracted_k141_7265    | 1478   | NA | 0  | 0 | Not-determined | Genome-fragment | NA    | 0     |
| S14_extracted_k141_28740   | 1182   | NA | 0  | 0 | Not-determined | Genome-fragment | NA    | 0     |
| S14_extracted_k141_65495   | 1331   | NA | 0  | 0 | Not-determined | Genome-fragment | NA    | 0     |
| S14_extracted_k141_17329   | 1349   | NA | 0  | 0 | Low-quality    | Genome-fragment | NA    | 3.15  |
| S14_extracted_k141_80532   | 2600   | NA | 0  | 2 | Not-determined | Genome-fragment | NA    | 0     |
| S14_extracted_k141_107562  | 1349   | NA | 1  | 0 | Low-quality    | Genome-fragment | NA    | 3.1   |
| S14_vs_k141_104005[ full]  | 1349   | NA | 0  | 0 | Low-quality    | Genome-fragment | NA    | 3.47  |
| S14_extracted_k141_102427  | 1282   | NA | 0  | 0 | Not-determined | Genome-fragment | NA    | 0     |
| S14_extracted_k141_117155  | 38997  | NA | 27 | 0 | Medium-quality | Genome-fragment | NA    | 65.14 |
| S14_extracted_k141_50778   | 1051   | NA | 0  | 2 | Not-determined | Genome-fragment | NA    | 0     |
| S14_extracted_k141_73196   | 1454   | NA | 0  | 3 | Not-determined | Genome-fragment | NA    | 0     |
| S3_vs_k141_120725[ full]   | 1349   | NA | 0  | 0 | Low-quality    | Genome-fragment | NA    | 2.06  |
| S14_extracted_k141_28910   | 1126   | NA | 0  | 0 | Not-determined | Genome-fragment | NA    | 0     |
| S14_extracted_k141_117157  | 59976  | NA | 9  | 0 | Complete       | High-quality    | 100   | 0     |
| S14_extracted_k141_73262   | 3969   | NA | 0  | 3 | Not-determined | Genome-fragment | NA    | 0     |
| S14_extracted_k141_28966   | 1397   | NA | 0  | 2 | Not-determined | Genome-fragment | NA    | 0     |
| S2_vs_k141_38189[ full]    | 1349   | NA | 0  | 0 | Low-quality    | Genome-fragment | NA    | 2.88  |
| S14_extracted_k141_65676   | 1233   | NA | 0  | 1 | Not-determined | Genome-fragment | NA    | 0     |
| S5_vs_k141_145346[ full]   | 1349   | NA | 1  | 0 | Low-quality    | Genome-fragment | NA    | 0.4   |
| S14_extracted_k141_117162  | 36948  | NA | 11 | 1 | Complete       | High-quality    | 100   | 0     |
| S7_vs_69467[ H2gene        | 1349   | NA | 2  | 0 | Low-quality    | Genome-fragment | NA    | 4.34  |
| S14_extracted_k141_117164  | 14258  | NA | 6  | 0 | Medium-quality | Genome-fragment | NA    | 65.51 |
| S14_extracted_k141_65861   | 33359  | NA | 24 | 1 | Complete       | High-quality    | 100   | 0     |
| S14_extracted_k141_65861   | 3397   | NA | 0  | 2 | Not-determined | Genome-fragment | NA    | 100   |
| S16_extracted_10659        | 1349   | NA | 0  | 0 | Low-quality    | Genome-fragment | NA    | 1.4   |
| S14_extracted_k141_117194  | 1393   | NA | 0  | 0 | Not-determined | Genome-fragment | NA    | 0     |
| S14_vs_k141_152281[ full]  | 150458 | NA | 13 | 5 | High-quality   | High-quality    | 97.82 | 0     |
| S14_vs_k141_88666[ full]   | 36753  | NA | 17 | 1 | High-quality   | High-quality    | 90.08 | 0     |
| S14_vs_k141_30439[ full]   | 34044  | NA | 16 | 0 | High-quality   | High-quality    | 99.24 | 0     |
| S14_vs_k141_96296[ full]   | 30986  | NA | 16 | 0 | High-quality   | High-quality    | 91.93 | 0     |
| S14_vs_k141_9676[ full]    | 42662  | NA | 12 | 0 | High-quality   | High-quality    | 100   | 0     |
| S14_vs_k141_69166[ full]   | 4148   | NA | 0  | 2 | Not-determined | Genome-fragment | NA    | 100   |
| S14_vs_k141_3251[ full]    | 34146  | NA | 14 | 2 | High-quality   | High-quality    | 100   | 0     |
| S14_vs_k141_263201[ full]  | 172200 | NA | 33 | 6 | High-quality   | High-quality    | 100   | 0     |
| S14_vs_k141_4887[ full]    | 40529  | NA | 7  | 2 | High-quality   | High-quality    | 97.58 | 0     |
| S14_vs_k141_42401[ full]   | 2574   | NA | 7  | 0 | Not-determined | Genome-fragment | NA    | 0     |
| S14_vs_k141_94597[ full]   | 5962   | NA | 0  | 0 | Not-determined | Genome-fragment | NA    | 0     |
| S16_vs_129987[ H2gene      | 1349   | NA | 1  | 0 | Low-quality    | Genome-fragment | NA    | 2.52  |
| S14_vs_k141_117153[ full]  | 37231  | NA | 13 | 0 | High-quality   | High-quality    | 100   | 0     |
| S10_extracted_2042         | 1349   | NA | 0  | 0 | Not-determined | Genome-fragment | NA    | 4.09  |
| S14_vs_k141_117158[ full]  | 40845  | NA | 23 | 2 | High-quality   | High-quality    | 93.32 | 0     |
| S14_vs_k141_117160[ full]  | 34792  | NA | 24 | 1 | Medium-quality | Genome-fragment | NA    | 89.27 |
| S14_vs_k141_117161[ full]  | 35177  | NA | 18 | 0 | High-quality   | High-quality    | 95.84 | 0     |
| S14_vs_k141_117163[ full]  | 14322  | NA | 0  | 0 | Not-determined | Genome-fragment | NA    | 0     |
| S14_vs_k141_117165[ full]  | 40247  | NA | 8  | 0 | High-quality   | High-quality    | 100   | 0     |
| S14_vs_k141_117166[ full]  | 38784  | NA | 18 | 2 | High-quality   | High-quality    | 94.06 | 0     |
| S14_vs_k141_117171[ full]  | 2414   | NA | 0  | 0 | Not-determined | Genome-fragment | NA    | 0     |
| S14_vs_k141_7331[ full]    | 2679   | NA | 0  | 1 | Not-determined | Genome-fragment | NA    | 0     |
| S10_extracted_9812         | 1349   | NA | 0  | 0 | Low-quality    | Genome-fragment | NA    | 1.82  |
| S14_vs_k141_293151[ full]  | 1729   | NA | 0  | 2 | Not-determined | Genome-fragment | NA    | 0     |
| S14_vs_k141_22006[ full]   | 1509   | NA | 0  | 2 | Not-determined | Genome-fragment | NA    | 0     |
| S14_vs_k141_43992[ full]   | 3614   | NA | 0  | 1 | Not-determined | Genome-fragment | NA    | 0     |
| S14_vs_k141_65985[ full]   | 2717   | NA | 0  | 2 | Not-determined | Genome-fragment | NA    | 0     |
| S14_vs_k141_440201[ full]  | 2139   | NA | 0  | 1 | Not-determined | Genome-fragment | NA    | 0     |
| S14_vs_k141_95278[ full]   | 1316   | NA | 0  | 0 | Not-determined | Genome-fragment | NA    | 0     |
| S12_extracted_k141_35360   | 1349   | NA | 0  | 0 | Low-quality    | Genome-fragment | NA    | 2.55  |
| S8_extracted_k141_14313    | 1349   | NA | 1  | 0 | Low-quality    | Genome-fragment | NA    | 1.97  |
| S14_vs_k141_29356[ full]   | 2981   | NA | 0  | 2 | Not-determined | Genome-fragment | NA    | 0     |
| S14_vs_k141_7401[ full]    | 1459   | NA | 0  | 1 | Not-determined | Genome-fragment | NA    | 0     |
| S14_vs_k141_87956[ full]   | 2897   | NA | 0  | 1 | Not-determined | Genome-fragment | NA    | 0     |
| S14_vs_k141_73301[ full]   | 29973  | NA | 17 | 0 | Medium-quality | Genome-fragment | NA    | 71.49 |
| S14_vs_k141_36754[ full]   | 1784   | NA | 0  | 1 | Not-determined | Genome-fragment | NA    | 0     |
| S14_vs_k141_29398[ full]   | 1185   | NA | 0  | 1 | Not-determined | Genome-fragment | NA    | 0     |
| S11_extracted_k141_52622   | 1350   | NA | 0  | 1 | Low-quality    | Genome-fragment | NA    | 0.41  |
| S14_vs_k141_14737[ full]   | 35673  | NA | 16 | 1 | High-quality   | High-quality    | 98.83 | 0     |
| S11_vs_k141_43808[ full]   | 1350   | NA | 2  | 0 | Low-quality    | Genome-fragment | NA    | 3.64  |
| S7_vs_99743[ full]         | 1350   | NA | 0  | 0 | Low-quality    | Genome-fragment | NA    | 2.75  |
| S16_vs_119454[ full]       | 1350   | NA | 0  | 0 | Low-quality    | Genome-fragment | NA    | 2.73  |
| S16_vs_121129[ full]       | 1350   | NA | 0  | 2 | Low-quality    | Genome-fragment | NA    | 0.38  |
| S14_vs_k141_36807[ full]   | 3898   | NA | 0  | 5 | Not-determined | Genome-fragment | NA    | 0     |
| S10_vs_11356[ full]        | 1350   | NA | 0  | 1 | Low-quality    | Genome-fragment | NA    | 1.83  |
| S14_vs_k141_7465[ full]    | 2883   | NA | 0  | 0 | Not-determined | Genome-fragment | NA    | 0     |
| S12_vs_k141_77072[ full]   | 1350   | NA | 0  | 0 | Low-quality    | Genome-fragment | NA    | 2.64  |
| S4_extracted_7875          | 1350   | NA | 1  | 0 | Low-quality    | Genome-fragment | NA    | 4.45  |
| S11_vs_k141_81040[ H2gene  | 1351   | NA | 1  | 0 | Low-quality    | Genome-fragment | NA    | 3.56  |
| S14_vs_k141_1831[ full]    | 11611  | NA | 0  | 4 | Not-determined | Genome-fragment | NA    | 0     |
| S14_vs_k141_95415[ full]   | 1125   | NA | 0  | 0 | Not-determined | Genome-fragment | NA    | 0     |
| S14_vs_k141_102698[ full]  | 22313  | NA | 15 | 0 | Medium-quality | Genome-fragment | NA    | 66.53 |
| S12_vs_59345[ full]        | 1351   | NA | 1  | 0 | Low-quality    | Genome-fragment | NA    | 2.75  |
| S14_vs_k141_51463[ full]   | 3038   | NA | 0  | 2 | Not-determined |                 |       |       |



|                           |          |        |     |       |    |    |                |                 |       |       |
|---------------------------|----------|--------|-----|-------|----|----|----------------|-----------------|-------|-------|
| S14_vx_k141_93590         | [full]   | 1352   | No  | NA    | 0  | 0  | Low-quality    | Genome-fragment | 1.74  | 0     |
| S14_vx_k141_88156         | [full]   | 1778   | No  | NA    | 0  | 0  | Not-determined | Genome-fragment | NA    | 0     |
| S14_vx_k141_29595         | [full]   | 3392   | No  | NA    | 0  | 4  | Not-determined | Genome-fragment | NA    | 0     |
| S14_vx_k141_7635          | [full]   | 7248   | No  | NA    | 0  | 1  | Not-determined | Genome-fragment | NA    | 0     |
| S14_vx_k141_102804        | [full]   | 1730   | No  | NA    | 0  | 0  | Not-determined | Genome-fragment | NA    | 0     |
| S3_extracted_k141_108151  | [full]   | 1352   | No  | NA    | 2  | 0  | Low-quality    | Genome-fragment | 2.63  | 0     |
| S3_vx_k141_115556         | [full]   | 1352   | No  | NA    | 1  | 0  | Low-quality    | Genome-fragment | 2.52  | 0     |
| S3_vx_k141_103361         | [full]   | 1352   | No  | NA    | 1  | 0  | Low-quality    | Genome-fragment | 0.75  | 0     |
| S7_vx_36722               | [full]   | 1352   | No  | NA    | 0  | 2  | Low-quality    | Genome-fragment | 1.87  | 0     |
| S14_vx_k141_66139         | [full]   | 198450 | Yes | 56174 | 26 | 89 | Medium-quality | Genome-fragment | 82.23 | 71.69 |
| S14_vx_k141_22271         | [full]   | 4976   | No  | NA    | 0  | 3  | Not-determined | Genome-fragment | NA    | 0     |
| S7_vx_83683               | [full]   | 1352   | No  | NA    | 0  | 0  | Low-quality    | Genome-fragment | 2.16  | 0     |
| S14_vx_k141_7683          | [full]   | 6337   | No  | NA    | 1  | 0  | Not-determined | Genome-fragment | NA    | 0     |
| S8_extracted_k141_183956  | [full]   | 1352   | No  | NA    | 0  | 0  | Low-quality    | Genome-fragment | 1.6   | 0     |
| S9_extracted_k141_41593   | [full]   | 1353   | No  | NA    | 1  | 0  | Low-quality    | Genome-fragment | 1.54  | 0     |
| S11_vx_k141_51600         | [full]   | 1353   | No  | NA    | 0  | 0  | Low-quality    | Genome-fragment | 1.79  | 0     |
| S14_vx_k141_51657         | [full]   | 1692   | No  | NA    | 0  | 2  | Not-determined | Genome-fragment | NA    | 0     |
| S14_vx_k141_51676         | [full]   | 3457   | No  | NA    | 0  | 1  | Not-determined | Genome-fragment | NA    | 0     |
| S14_vx_k141_80957         | [full]   | 1866   | No  | NA    | 0  | 2  | Not-determined | Genome-fragment | NA    | 0     |
| S14_vx_k141_14985         | [full]   | 7969   | No  | NA    | 0  | 5  | Not-determined | Genome-fragment | NA    | 0     |
| S14_vx_k141_495           | [full]   | 1685   | No  | NA    | 0  | 0  | Not-determined | Genome-fragment | NA    | 0     |
| S14_vx_k141_44218         | [full]   | 1578   | No  | NA    | 0  | 1  | Not-determined | Genome-fragment | NA    | 0     |
| S14_vx_k141_102917        | [full]   | 5647   | No  | NA    | 0  | 2  | Not-determined | Genome-fragment | NA    | 0     |
| S11_vx_k141_15578         | [full]   | 1353   | No  | NA    | 1  | 0  | Low-quality    | Genome-fragment | 3.38  | 0     |
| S14_vx_k141_88282         | [full]   | 1914   | No  | NA    | 0  | 0  | Not-determined | Genome-fragment | NA    | 0     |
| S14_vx_k141_547           | [full]   | 1476   | No  | NA    | 0  | 0  | Not-determined | Genome-fragment | NA    | 0     |
| S14_vx_k141_66208         | [full]   | 67174  | Yes | 48001 | 14 | 10 | Complete       | High-quality    | 100   | 28.54 |
| S13_extracted_28117       | [full]   | 1353   | No  | NA    | 0  | 1  | Low-quality    | Genome-fragment | 2.26  | 0     |
| S13_extracted_39161       | [full]   | 1353   | No  | NA    | 0  | 0  | Low-quality    | Genome-fragment | 1.4   | 0     |
| S1_vx_k141_126895         | [full]   | 1353   | No  | NA    | 0  | 0  | Low-quality    | Genome-fragment | 2.59  | 0     |
| S14_vx_k141_29751         | [full]   | 1144   | No  | NA    | 0  | 2  | Not-determined | Genome-fragment | NA    | 0     |
| S1_vx_k141_153456         | [full]   | 1353   | No  | NA    | 0  | 0  | Low-quality    | Genome-fragment | 2.26  | 0     |
| S1_vx_k141_41883          | [H2gene] | 1353   | No  | NA    | 0  | 0  | Low-quality    | Genome-fragment | 2.31  | 0     |
| S3_extracted_k141_96516   | [full]   | 1353   | No  | NA    | 0  | 1  | Low-quality    | Genome-fragment | 2.66  | 0     |
| S3_extracted_k141_82331   | [full]   | 1353   | No  | NA    | 0  | 0  | Low-quality    | Genome-fragment | 2.62  | 0     |
| S14_vx_k141_44323         | [full]   | 3074   | No  | NA    | 0  | 1  | Not-determined | Genome-fragment | NA    | 0     |
| S3_vx_k141_111919         | [full]   | 1353   | No  | NA    | 0  | 0  | Low-quality    | Genome-fragment | 2.25  | 0     |
| S14_vx_k141_103003        | [full]   | 8979   | No  | NA    | 0  | 6  | Not-determined | Genome-fragment | NA    | 0     |
| S5_extracted_k141_36285   | [full]   | 1353   | No  | NA    | 2  | 1  | Low-quality    | Genome-fragment | 0.65  | 0     |
| S14_vx_k141_29805         | [full]   | 1440   | No  | NA    | 0  | 0  | Not-determined | Genome-fragment | NA    | 0     |
| S5_vx_k141_78886          | [full]   | 1353   | No  | NA    | 0  | 0  | Low-quality    | Genome-fragment | 3.08  | 0     |
| S10_extracted_7419        | [full]   | 1353   | No  | NA    | 0  | 0  | Low-quality    | Genome-fragment | 1.25  | 0     |
| S10_vx_1307               | [full]   | 1353   | No  | NA    | 0  | 0  | Low-quality    | Genome-fragment | 2.49  | 0     |
| S10_vx_23387              | [full]   | 1353   | No  | NA    | 0  | 0  | Low-quality    | Genome-fragment | 2.68  | 0     |
| S14_vx_k141_29833         | [full]   | 12367  | No  | NA    | 0  | 3  | Not-determined | Genome-fragment | NA    | 0     |
| S14_vx_k141_37199         | [full]   | 1114   | No  | NA    | 0  | 0  | Not-determined | Genome-fragment | NA    | 0     |
| S12_vx_k141_122661        | [full]   | 1353   | No  | NA    | 0  | 2  | Low-quality    | Genome-fragment | 3.13  | 0     |
| S8_extracted_k141_113370  | [full]   | 1353   | No  | NA    | 1  | 0  | Low-quality    | Genome-fragment | 2.74  | 0     |
| S14_vx_k141_631           | [full]   | 3747   | No  | NA    | 33 | 1  | Medium-quality | Genome-fragment | 83.64 | 0     |
| S14_vx_k141_110290        | [full]   | 33612  | No  | NA    | 22 | 1  | High-quality   | High-quality    | 99.36 | 0     |
| S14_vx_k141_777           | [full]   | 1350   | No  | NA    | 0  | 0  | Not-determined | Genome-fragment | NA    | 0     |
| S17_vx_k141_54149         | [full]   | 1354   | No  | NA    | 0  | 0  | Low-quality    | Genome-fragment | 2.35  | 0     |
| S14_vx_k141_95835         | [full]   | 3057   | No  | NA    | 1  | 2  | Not-determined | Genome-fragment | NA    | 0     |
| S14_extracted_k141_92119  | [full]   | 1354   | No  | NA    | 1  | 0  | Low-quality    | Genome-fragment | 4.37  | 0     |
| S16_extracted_16388       | [full]   | 1354   | No  | NA    | 0  | 0  | Low-quality    | Genome-fragment | 2.23  | 0     |
| S14_vx_k141_88409         | [full]   | 6371   | No  | NA    | 0  | 2  | Not-determined | Genome-fragment | NA    | 0     |
| S8_vx_k141_171538         | [full]   | 1354   | No  | NA    | 3  | 0  | Low-quality    | Genome-fragment | 2.43  | 0     |
| S14_vx_k141_7808          | [full]   | 1252   | No  | NA    | 0  | 1  | Not-determined | Genome-fragment | NA    | 0     |
| S17_extracted_k141_76504  | [full]   | 1355   | No  | NA    | 0  | 1  | Low-quality    | Genome-fragment | 0.88  | 0     |
| S14_vx_k141_44383         | [full]   | 15296  | No  | NA    | 0  | 5  | Not-determined | Genome-fragment | NA    | 0     |
| S17_extracted_k141_27867  | [full]   | 1355   | No  | NA    | 0  | 0  | Low-quality    | Genome-fragment | 4.19  | 0     |
| S9_vx_k141_53017          | [full]   | 1355   | No  | NA    | 0  | 0  | Low-quality    | Genome-fragment | 3.38  | 0     |
| S11_vx_k141_77053         | [full]   | 1355   | No  | NA    | 1  | 0  | Low-quality    | Genome-fragment | 3.99  | 0     |
| S14_vx_k141_44424         | [full]   | 1599   | No  | NA    | 0  | 2  | Not-determined | Genome-fragment | NA    | 0     |
| S14_extracted_k141_81858  | [full]   | 1355   | No  | NA    | 0  | 0  | Low-quality    | Genome-fragment | 3.01  | 0     |
| S14_vx_k141_88484         | [full]   | 2285   | No  | NA    | 0  | 1  | Not-determined | Genome-fragment | NA    | 0     |
| S14_extracted_k141_27655  | [full]   | 1355   | No  | NA    | 4  | 0  | Low-quality    | Genome-fragment | 4.47  | 0     |
| S3_vx_k141_57587          | [full]   | 1355   | No  | NA    | 0  | 0  | Low-quality    | Genome-fragment | 3.84  | 0     |
| S5_vx_k141_138674         | [H2gene] | 1355   | No  | NA    | 0  | 0  | Low-quality    | Genome-fragment | 2.35  | 0     |
| S7_vx_70866               | [H2gene] | 1355   | No  | NA    | 2  | 0  | Low-quality    | Genome-fragment | 3.68  | 0     |
| S16_vx_54005              | [full]   | 1355   | No  | NA    | 0  | 0  | Low-quality    | Genome-fragment | 1.87  | 0     |
| S14_vx_k141_51883         | [full]   | 2265   | No  | NA    | 0  | 0  | Not-determined | Genome-fragment | NA    | 0     |
| S12_extracted_k141_178625 | [full]   | 1355   | No  | NA    | 0  | 0  | Low-quality    | Genome-fragment | 3.29  | 0     |
| S12_vx_k141_167253        | [full]   | 1355   | No  | NA    | 0  | 0  | Low-quality    | Genome-fragment | 2.67  | 0     |
| S4_extracted_22209        | [full]   | 1355   | No  | NA    | 1  | 0  | Low-quality    | Genome-fragment | 2.98  | 0     |
| S8_vx_k141_144063         | [full]   | 1355   | No  | NA    | 0  | 0  | Low-quality    | Genome-fragment | 0.75  | 0     |
| S8_vx_k141_50777          | [full]   | 1355   | No  | NA    | 0  | 0  | Low-quality    | Genome-fragment | 1.93  | 0     |
| S17_vx_k141_90380         | [full]   | 1356   | No  | NA    | 0  | 0  | Low-quality    | Genome-fragment | 3.02  | 0     |
| S17_vx_k141_6827          | [full]   | 1356   | No  | NA    | 0  | 0  | Low-quality    | Genome-fragment | 2.21  | 0     |
| S14_vx_k141_110424        | [full]   | 2404   | No  | NA    | 0  | 1  | Not-determined | Genome-fragment | NA    | 0     |
| S11_extracted_k141_27310  | [full]   | 1356   | No  | NA    | 0  | 0  | Low-quality    | Genome-fragment | 2.24  | 0     |
| S11_vx_k141_53905         | [full]   | 1356   | No  | NA    | 0  | 0  | Low-quality    | Genome-fragment | 2.26  | 0     |
| S14_vx_k141_59292         | [full]   | 1957   | No  | NA    | 0  | 3  | Not-determined | Genome-fragment | NA    | 0     |
| S11_vx_k141_97578         | [full]   | 1356   | No  | NA    | 0  | 0  | Low-quality    | Genome-fragment | 2.37  | 0     |
| S14_vx_k141_56412         | [full]   | 1361   | No  | NA    | 0  | 1  | Not-determined | Genome-fragment | NA    | 0     |
| S3_vx_k141_93773          | [full]   | 1356   | No  | NA    | 1  | 0  | Low-quality    | Genome-fragment | 3.1   | 0     |
| S14_vx_k141_59300         | [full]   | 1107   | No  | NA    | 0  | 0  | Not-determined | Genome-fragment | NA    | 0     |
| S16_vx_12310              | [H2gene] | 1356   | No  | NA    | 1  | 0  | Low-quality    | Genome-fragment | 3.8   | 0     |
| S14_vx_k141_818           | [full]   | 1657   | No  | NA    | 0  | 0  | Not-determined | Genome-fragment | NA    | 0     |
| S14_vx_k141_110493        | [full]   | 3090   | No  | NA    | 0  | 0  | Not-determined | Genome-fragment | NA    | 0     |
| S10_extracted_5550        | [full]   | 1356   | No  | NA    | 0  | 0  | Low-quality    | Genome-fragment | 1.26  | 0     |
| S14_vx_k141_89639         | [full]   | 1549   | No  | NA    | 0  | 2  | Not-determined | Genome-fragment | NA    | 0     |
| S14_vx_k141_73784         | [full]   | 2348   | No  | NA    | 0  | 2  | Not-determined | Genome-fragment | NA    | 0     |
| S14_vx_k141_110522        | [full]   | 2727   | No  | NA    | 0  | 2  | Not-determined | Genome-fragment | NA    | 0     |
| S10_vx_24272              | [full]   | 1356   | No  | NA    | 0  | 0  | Low-quality    | Genome-fragment | 2.46  | 0     |
| S14_vx_k141_30032         | [full]   | 1717   | No  | NA    | 0  | 0  | Not-determined | Genome-fragment | NA    | 0     |
| S14_vx_k141_52058         | [full]   | 1146   | No  | NA    | 0  | 1  | Not-determined | Genome-fragment | NA    | 0     |
| S14_vx_k141_15237         | [full]   | 8935   | No  | NA    | 0  | 2  | Not-determined | Genome-fragment | NA    | 0     |
| S14_vx_k141_44531         | [full]   | 18080  | No  | NA    | 12 | 1  | Not-determined | Genome-fragment | NA    | 0     |
| S12_extracted_k141_50389  | [full]   | 1356   | No  | NA    | 0  | 2  | Low-quality    | Genome-fragment | 0.88  | 0     |
| S8_vx_k141_109433         | [full]   | 1356   | No  | NA    | 0  | 0  | Low-quality    | Genome-fragment | 3.65  | 0     |
| S9_vx_k141_6602           | [full]   | 1357   | No  | NA    | 0  | 0  | Low-quality    | Genome-fragment | 0.98  | 0     |
| S11_extracted_k141_3220   | [full]   | 1357   | No  | NA    | 2  | 0  | Low-quality    | Genome-fragment | 1.14  | 0     |
| S14_vx_k141_8024          | [full]   | 4821   | No  | NA    | 0  | 0  | Not-determined | Genome-fragment | NA    | 0     |
| S14_vx_k141_52133         | [full]   | 2018   | No  | NA    | 1  | 1  | Not-determined | Genome-fragment | NA    | 0     |
| S11_vx_k141_28871         | [H2gene] | 1357   | No  | NA    | 1  | 0  | Low-quality    | Genome-fragment | 2.28  | 0     |
| S14_vx_k141_88695         | [full]   | 2964   | No  | NA    | 0  | 3  | Not-determined | Genome-fragment | NA    | 0     |
| S14_vx_k141_59447         | [full]   | 36660  | No  | NA    | 15 | 1  | High-quality   | High-quality    | 95.27 | 0     |
| S14_extracted_k141_22878  | [full]   | 1357   | No  | NA    | 2  | 0  | Low-quality    | Genome-fragment | 4.48  | 0     |
| S14_vx_k141_89450         | [full]   | 1357   | No  | NA    | 2  | 0  | Low-quality    | Genome-fragment | 3.22  | 0     |
| S14_vx_k141_73857         | [full]   | 1511   | No  | NA    | 0  | 0  | Not-determined | Genome-fragment | NA    | 0     |
| S14_vx_k141_73862         | [full]   | 1171   | No  | NA    | 0  | 0  | Not-determined | Genome-fragment | NA    | 0     |
| S14_vx_k141_37522         | [full]   | 3825   | No  | NA    | 0  | 1  | Not-determined | Genome-fragment | NA    | 0     |
| S14_vx_k141_30108         | [full]   | 28701  | No  | NA    | 9  | 1  | Medium-quality | Genome-fragment | 66.39 | 0     |
| S1_extracted_k141_55607   | [full]   | 1357   | No  | NA    | 0  | 0  | Low-quality    | Genome-fragment | 2.43  | 0     |
| S3_vx_k141_76999          | [H2gene] | 1357   | No  | NA    | 1  | 0  | Low-quality    | Genome-fragment | 3.47  | 0     |
| S14_vx_k141_15354         | [full]   | 2887   | No  | NA    | 0  | 0  | Not-determined | Genome-fragment | NA    | 0     |
| S14_vx_k141_52160         | [full]   | 28351  | No  | NA    | 0  | 5  | Not-determined | Genome-fragment | NA    | 0     |
| S14_vx_k141_52177         | [full]   | 6451   | No  | NA    | 0  | 2  | Not-determined | Genome-fragment | NA    | 0     |
| S16_vx_924                | [full]   | 1357   | No  | NA    | 0  | 0  | Low-quality    | Genome-fragment | 2.16  | 0     |
| S12_vx_k141_4461          | [full]   | 1357   | No  | NA    | 0  | 1  | Low-quality    | Genome-fragment | 0.6   | 0     |
| S12_vx_k141_172835        | [full]   | 1357   | No  | NA    | 0  | 0  | Low-quality    | Genome-fragment | NA    | 0     |
| S15_extracted_57319       | [full]   | 1357   | No  | NA    | 0  | 0  | Low-quality    | Genome-fragment | 3.27  | 0     |
| S8_extracted_k141_165629  | [full]   | 1357   | No  | NA    | 1  | 0  | Low-quality    | Genome-fragment | 2.55  | 0     |
| S14_vx_k141_8104          | [full]   | 1164   | No  | NA    | 0  | 1  | Not-determined | Genome-fragment | NA    | 0     |
| S14_vx_k141_110634        | [full]   | 4559   | No  | NA    | 0  | 3  | Not-determined | Genome-fragment | NA    | 0     |
| S8_vx_k141_144151         | [full]   | 1357   | No  | NA    | 0  | 2  | Low-quality    | Genome-fragment | 0.72  | 0     |
| S14_vx_k141_89767         | [full]   | 1752   | No  | NA    | 0  | 2  | Not-determined | Genome-fragment | NA    | 0     |
| S14_vx_k141_30152         | [full]   | 12244  | No  | NA    | 0  | 1  | Not-determined | Genome-fragment | NA    | 0     |
| S17_vx_k141_93825         | [full]   | 1358   | No  | NA    | 0  | 0  | Low-quality    | Genome-fragment | 2.98  | 0     |
| S9_extracted_k141_87125   | [full]   | 1358   | No  | NA    | 1  | 0  | Low-quality    | Genome-fragment | 1.46  | 0     |
| S11_vx_k141_13234         | [full]   | 1358   | No  | NA    | 1  | 0  | Low-quality    | Genome-fragment | 2.01  | 0     |
| S14_vx_k141_103381        | [full]   | 1246   | No  | NA    | 0  | 0  | Not-determined | Genome-fragment | NA    | 0     |
| S14_vx_k141_37607         | [full]   | 14720  | No  | NA    | 0  | 5  | Not-determined | Genome-fragment | NA    | 0     |
| S3_extracted_k141_132240  | [full]   | 1358   | No  | NA    | 0  | 1  |                |                 |       |       |



|                           |          |       |     |    |    |    |                |                 |       |       |
|---------------------------|----------|-------|-----|----|----|----|----------------|-----------------|-------|-------|
| 58_vs_k141_146296         | [full]   | 1359  | No  | NA | 0  | 0  | Low-quality    | Genome-fragment | 1.45  | 0     |
| 59_vs_k141_1798           | [H2gene] | 1360  | No  | NA | 0  | 0  | Low-quality    | Genome-fragment | 1.55  | 0     |
| 513_extracted_94146       |          | 1360  | No  | NA | 0  | 0  | Low-quality    | Genome-fragment | 7.36  | 0     |
| 514_vs_k141_103625        | [full]   | 1891  | No  | NA | 0  | 2  | Not-determined | Genome-fragment | NA    | 0     |
| 513_vs_85918              | [full]   | 1360  | No  | NA | 0  | 0  | Low-quality    | Genome-fragment | 0.75  | 0     |
| 57_vs_92108               | [full]   | 1360  | No  | NA | 0  | 0  | Low-quality    | Genome-fragment | 3.49  | 0     |
| 57_vs_60639               | [H2gene] | 1360  | No  | NA | 1  | 0  | Low-quality    | Genome-fragment | 1.25  | 0     |
| 515_extracted_32737       |          | 1360  | No  | NA | 1  | 0  | Low-quality    | Genome-fragment | 1.29  | 0     |
| 517_vs_k141_135125        | [H2gene] | 1361  | No  | NA | 0  | 0  | Low-quality    | Genome-fragment | 2.87  | 0     |
| 514_vs_k141_82122         | [full]   | 1156  | No  | NA | 0  | 1  | Not-determined | Genome-fragment | NA    | 0     |
| 514_vs_k141_52429         | [full]   | 1836  | No  | NA | 0  | 3  | Not-determined | Genome-fragment | NA    | 0     |
| 59_vs_k141_8351           | [full]   | 1361  | No  | NA | 0  | 1  | Low-quality    | Genome-fragment | 1.77  | 0     |
| 514_vs_k141_103700        | [full]   | 1403  | No  | NA | 0  | 0  | Not-determined | Genome-fragment | NA    | 0     |
| 514_vs_k141_96111         | [full]   | 29345 | Yes |    | 19 | 5  | Medium-quality | Genome-fragment | 56.04 | 10.95 |
| 514_vs_k141_103805        | [full]   | 1361  | No  | NA | 1  | 0  | Low-quality    | Genome-fragment | 3.23  | 0     |
| 51_extracted_k141_150655  |          | 1361  | No  | NA | 0  | 0  | Low-quality    | Genome-fragment | 3.03  | 0     |
| 514_vs_k141_59667         | [full]   | 2508  | No  | NA | 0  | 0  | Not-determined | Genome-fragment | NA    | 0     |
| 51_vs_k141_40202          | [full]   | 1361  | No  | NA | 1  | 0  | Low-quality    | Genome-fragment | 2.27  | 0     |
| 55_extracted_k141_106398  |          | 1361  | No  | NA | 0  | 0  | Low-quality    | Genome-fragment | 0.89  | 0     |
| 514_vs_k141_59695         | [full]   | 3871  | No  | NA | 0  | 3  | Not-determined | Genome-fragment | NA    | 0     |
| 57_extracted_77819        |          | 1361  | No  | NA | 3  | 0  | Low-quality    | Genome-fragment | 6.21  | 0     |
| 514_vs_k141_99023         | [full]   | 1475  | No  | NA | 0  | 0  | Not-determined | Genome-fragment | NA    | 0     |
| 57_vs_85551               | [full]   | 1361  | No  | NA | 1  | 0  | Low-quality    | Genome-fragment | 3.05  | 0     |
| 516_extracted_172999      |          | 1361  | No  | NA | 0  | 1  | Low-quality    | Genome-fragment | 1.63  | 0     |
| 510_extracted_89050       |          | 1361  | No  | NA | 0  | 0  | Low-quality    | Genome-fragment | 3.5   | 0     |
| 514_vs_k141_74067         | [full]   | 25282 | Yes |    | 13 | 94 | Medium-quality | Genome-fragment | 51.55 | 76.39 |
| 514_vs_k141_111017        | [full]   | 2698  | No  | NA | 0  | 2  | Not-determined | Genome-fragment | NA    | 0     |
| 514_vs_k141_1221          | [full]   | 1249  | No  | NA | 0  | 2  | Not-determined | Genome-fragment | NA    | 0     |
| 514_vs_k141_1221          | [full]   | 1373  | No  | NA | 0  | 0  | Not-determined | Genome-fragment | NA    | 0     |
| 510_extracted_105209      |          | 1361  | No  | NA | 0  | 1  | Low-quality    | Genome-fragment | 0.63  | 0     |
| 512_extracted_k141_13589  |          | 1361  | No  | NA | 0  | 1  | Low-quality    | Genome-fragment | 0.47  | 0     |
| 514_vs_k141_59662         | [full]   | 2152  | No  | NA | 0  | 0  | Not-determined | Genome-fragment | NA    | 0     |
| 514_vs_k141_37896         | [full]   | 1013  | No  | NA | 0  | 0  | Not-determined | Genome-fragment | NA    | 0     |
| 514_vs_k141_59756         | [full]   | 2239  | No  | NA | 0  | 0  | Not-determined | Genome-fragment | NA    | 0     |
| 58_extracted_k141_178962  |          | 1361  | No  | NA | 0  | 0  | Low-quality    | Genome-fragment | 2.62  | 0     |
| 514_vs_k141_15757         | [full]   | 2033  | No  | NA | 0  | 1  | Not-determined | Genome-fragment | NA    | 0     |
| 58_extracted_k141_128463  |          | 1361  | No  | NA | 1  | 0  | Low-quality    | Genome-fragment | 3.8   | 0     |
| 514_vs_k141_111050        | [full]   | 1066  | No  | NA | 0  | 0  | Not-determined | Genome-fragment | NA    | 0     |
| 517_extracted_k141_94173  |          | 1362  | No  | NA | 0  | 1  | Low-quality    | Genome-fragment | 0.16  | 0     |
| 514_vs_k141_37935         | [full]   | 4930  | No  | NA | 0  | 2  | Not-determined | Genome-fragment | NA    | 0     |
| 511_extracted_k141_96207  |          | 1362  | No  | NA | 4  | 0  | Low-quality    | Genome-fragment | 3.66  | 0     |
| 513_vs_86254              | [full]   | 1362  | No  | NA | 0  | 0  | Low-quality    | Genome-fragment | 1.86  | 0     |
| 514_extracted_k141_30313  |          | 1362  | No  | NA | 2  | 0  | Low-quality    | Genome-fragment | 2.27  | 0     |
| 514_vs_k141_52461         | [full]   | 4562  | No  | NA | 0  | 3  | Not-determined | Genome-fragment | NA    | 0     |
| 514_vs_k141_56985         | [full]   | 1362  | No  | NA | 1  | 0  | Low-quality    | Genome-fragment | 2.49  | 0     |
| 51_vs_k141_6753           | [full]   | 1362  | No  | NA | 0  | 0  | Low-quality    | Genome-fragment | 3.65  | 0     |
| 514_vs_k141_30566         | [full]   | 34961 | No  | NA | 27 | 0  | Medium-quality | Genome-fragment | 87.84 | 0     |
| 514_vs_k141_59802         | [full]   | 4600  | No  | NA | 0  | 1  | Not-determined | Genome-fragment | NA    | 0     |
| 514_vs_k141_15896         | [full]   | 3472  | No  | NA | 0  | 0  | Not-determined | Genome-fragment | NA    | 0     |
| 53_extracted_k141_14732   |          | 1362  | No  | NA | 0  | 0  | Low-quality    | Genome-fragment | 1.99  | 0     |
| 55_extracted_k141_90290   |          | 1362  | No  | NA | 0  | 1  | Low-quality    | Genome-fragment | 2.11  | 0     |
| 55_vs_k141_123407         | [full]   | 1362  | No  | NA | 0  | 1  | Low-quality    | Genome-fragment | 0.4   | 0     |
| 514_vs_k141_45054         | [full]   | 3586  | No  | NA | 0  | 2  | Not-determined | Genome-fragment | NA    | 0     |
| 514_vs_k141_8459          | [full]   | 1120  | No  | NA | 0  | 2  | Not-determined | Genome-fragment | NA    | 0     |
| 57_vs_128067              | [full]   | 1362  | No  | NA | 0  | 0  | Low-quality    | Genome-fragment | 3.12  | 0     |
| 514_vs_k141_45073         | [full]   | 1523  | No  | NA | 0  | 1  | Not-determined | Genome-fragment | NA    | 0     |
| 516_vs_32918              | [full]   | 1362  | No  | NA | 0  | 0  | Low-quality    | Genome-fragment | 2.21  | 0     |
| 514_vs_k141_89208         | [full]   | 1752  | No  | NA | 0  | 1  | Not-determined | Genome-fragment | NA    | 0     |
| 514_vs_k141_15965         | [full]   | 1809  | No  | NA | 0  | 0  | Not-determined | Genome-fragment | NA    | 0     |
| 514_vs_k141_66757         | [full]   | 2330  | No  | NA | 0  | 2  | Not-determined | Genome-fragment | NA    | 0     |
| 514_vs_k141_74328         | [full]   | 1897  | No  | NA | 0  | 0  | Not-determined | Genome-fragment | NA    | 0     |
| 514_vs_k141_66768         | [full]   | 5413  | No  | NA | 0  | 4  | Not-determined | Genome-fragment | NA    | 0     |
| 510_vs_39248              | [H2gene] | 1362  | No  | NA | 1  | 0  | Low-quality    | Genome-fragment | 3.61  | 0     |
| 512_extracted_k141_86511  |          | 1362  | No  | NA | 0  | 0  | Low-quality    | Genome-fragment | 0.89  | 0     |
| 56_extracted_k141_5407    |          | 1362  | No  | NA | 0  | 0  | Low-quality    | Genome-fragment | 4.61  | 0     |
| 59_extracted_k141_76465   |          | 1363  | No  | NA | 4  | 0  | Low-quality    | Genome-fragment | 3.92  | 0     |
| 514_vs_k141_96194         | [full]   | 1472  | No  | NA | 0  | 1  | Not-determined | Genome-fragment | NA    | 0     |
| 514_vs_k141_89271         | [full]   | 1485  | No  | NA | 0  | 2  | Not-determined | Genome-fragment | NA    | 0     |
| 59_extracted_k141_51293   |          | 1363  | No  | NA | 0  | 0  | Low-quality    | Genome-fragment | 3.58  | 0     |
| 51_vs_k141_60681          | [full]   | 1363  | No  | NA | 0  | 0  | Low-quality    | Genome-fragment | 4.02  | 0     |
| 53_vs_k141_7411           | [full]   | 1363  | No  | NA | 1  | 0  | Low-quality    | Genome-fragment | 1.73  | 0     |
| 514_vs_k141_38083         | [full]   | 1370  | No  | NA | 0  | 0  | Not-determined | Genome-fragment | NA    | 0     |
| 514_vs_k141_23115         | [full]   | 3392  | No  | NA | 0  | 2  | Not-determined | Genome-fragment | NA    | 0     |
| 53_vs_k141_13350          | [full]   | 1363  | No  | NA | 2  | 0  | Low-quality    | Genome-fragment | 3.6   | 0     |
| 516_vs_125137             | [full]   | 1363  | No  | NA | 0  | 0  | Low-quality    | Genome-fragment | 2.58  | 0     |
| 510_vs_109406             | [full]   | 1363  | No  | NA | 0  | 0  | Low-quality    | Genome-fragment | 1.52  | 0     |
| 58_extracted_k141_104269  |          | 1363  | No  | NA | 0  | 0  | Low-quality    | Genome-fragment | 1.37  | 0     |
| 59_vs_k141_3647           | [H2gene] | 1364  | No  | NA | 2  | 0  | Low-quality    | Genome-fragment | 2.95  | 0     |
| 513_vs_153832             | [full]   | 1364  | No  | NA | 0  | 1  | Low-quality    | Genome-fragment | 0.97  | 0     |
| 514_vs_k141_89302         | [full]   | 1020  | No  | NA | 0  | 0  | Not-determined | Genome-fragment | NA    | 0     |
| 514_vs_k141_73517         | [H2gene] | 1364  | No  | NA | 1  | 0  | Low-quality    | Genome-fragment | 3.05  | 0     |
| 51_extracted_k141_116595  |          | 1364  | No  | NA | 0  | 1  | Low-quality    | Genome-fragment | 3.42  | 0     |
| 514_vs_k141_104053        | [full]   | 3454  | No  | NA | 0  | 2  | Not-determined | Genome-fragment | NA    | 0     |
| 514_vs_k141_66841         | [full]   | 19282 | No  | NA | 13 | 0  | Medium-quality | Genome-fragment | 55    | 0     |
| 514_vs_k141_23288         | [full]   | 5216  | No  | NA | 0  | 2  | Not-determined | Genome-fragment | NA    | 0     |
| 514_vs_k141_38162         | [full]   | 1044  | No  | NA | 0  | 0  | Not-determined | Genome-fragment | NA    | 0     |
| 514_vs_k141_23208         | [full]   | 1302  | No  | NA | 0  | 1  | Not-determined | Genome-fragment | NA    | 0     |
| 51_vs_k141_115749         | [full]   | 1364  | No  | NA | 0  | 1  | Low-quality    | Genome-fragment | 2.08  | 0     |
| 514_vs_k141_96117         | [full]   | 2505  | No  | NA | 0  | 0  | Not-determined | Genome-fragment | NA    | 0     |
| 514_vs_k141_38182         | [full]   | 3429  | No  | NA | 0  | 2  | Not-determined | Genome-fragment | NA    | 0     |
| 514_vs_k141_111399        | [full]   | 3680  | No  | NA | 0  | 0  | Not-determined | Genome-fragment | NA    | 0     |
| 53_extracted_k141_94417   |          | 1364  | No  | NA | 0  | 1  | Low-quality    | Genome-fragment | 2.26  | 0     |
| 55_vs_k141_87119          | [full]   | 1364  | No  | NA | 0  | 1  | Low-quality    | Genome-fragment | 0.87  | 0     |
| 514_vs_k141_23227         | [full]   | 1100  | No  | NA | 0  | 0  | Not-determined | Genome-fragment | NA    | 0     |
| 516_vs_58659              | [full]   | 1364  | No  | NA | 0  | 0  | Low-quality    | Genome-fragment | 2.39  | 0     |
| 512_vs_k141_82128         | [full]   | 1364  | No  | NA | 0  | 0  | Low-quality    | Genome-fragment | 3.63  | 0     |
| 514_vs_k141_60036         | [full]   | 14901 | No  | NA | 0  | 10 | Not-determined | Genome-fragment | NA    | 0     |
| 54_extracted_13994        |          | 1364  | No  | NA | 1  | 0  | Low-quality    | Genome-fragment | 5.02  | 0     |
| 517_extracted_k141_167426 |          | 1365  | No  | NA | 1  | 1  | Low-quality    | Genome-fragment | 0.94  | 0     |
| 59_vs_k141_58080          | [full]   | 1365  | No  | NA | 0  | 0  | Low-quality    | Genome-fragment | 0.79  | 0     |
| 511_vs_k141_63115         | [H2gene] | 1365  | No  | NA | 1  | 0  | Low-quality    | Genome-fragment | 3.18  | 0     |
| 514_vs_k141_69551         | [full]   | 1516  | No  | NA | 0  | 0  | Not-determined | Genome-fragment | NA    | 0     |
| 514_vs_k141_52679         | [full]   | 1075  | No  | NA | 0  | 1  | Not-determined | Genome-fragment | NA    | 0     |
| 514_extracted_k141_30507  |          | 1365  | No  | NA | 2  | 0  | Low-quality    | Genome-fragment | 3.59  | 0     |
| 514_vs_k141_60066         | [full]   | 1870  | No  | NA | 0  | 1  | Not-determined | Genome-fragment | NA    | 0     |
| 514_vs_k141_96358         | [full]   | 2894  | No  | NA | 0  | 3  | Not-determined | Genome-fragment | NA    | 0     |
| 514_extracted_k141_18318  |          | 1365  | No  | NA | 3  | 0  | Low-quality    | Genome-fragment | 4.51  | 0     |
| 514_vs_k141_96364         | [full]   | 2604  | No  | NA | 0  | 2  | Not-determined | Genome-fragment | NA    | 0     |
| 53_extracted_k141_6734    |          | 1365  | No  | NA | 0  | 0  | Low-quality    | Genome-fragment | 2.21  | 0     |
| 57_extracted_80286        |          | 1365  | No  | NA | 1  | 0  | Low-quality    | Genome-fragment | 0.79  | 0     |
| 57_vs_5751                | [H2gene] | 1365  | No  | NA | 2  | 0  | Low-quality    | Genome-fragment | 3.22  | 0     |
| 516_vs_60751              | [full]   | 1365  | No  | NA | 0  | 0  | Low-quality    | Genome-fragment | 3.82  | 0     |
| 510_extracted_2684        |          | 1365  | No  | NA | 3  | 0  | Low-quality    | Genome-fragment | 4.82  | 0     |
| 514_vs_k141_8783          | [full]   | 1326  | No  | NA | 0  | 2  | Not-determined | Genome-fragment | NA    | 0     |
| 514_vs_k141_52800         | [full]   | 1674  | No  | NA | 0  | 1  | Not-determined | Genome-fragment | NA    | 0     |
| 512_extracted_k141_148408 |          | 1365  | No  | NA | 2  | 0  | Low-quality    | Genome-fragment | 4.21  | 0     |
| 514_vs_k141_16241         | [full]   | 6920  | No  | NA | 0  | 4  | Not-determined | Genome-fragment | NA    | 0     |
| 55_vs_k141_8908           | [full]   | 1366  | No  | NA | 2  | 0  | Low-quality    | Genome-fragment | 3.61  | 0     |
| 55_extracted_k141_140881  |          | 1366  | No  | NA | 0  | 0  | Low-quality    | Genome-fragment | 0.92  | 0     |
| 514_vs_k141_52814         | [full]   | 2134  | No  | NA | 0  | 2  | Not-determined | Genome-fragment | NA    | 0     |
| 514_vs_k141_30852         | [full]   | 1841  | No  | NA | 0  | 0  | Not-determined | Genome-fragment | NA    | 0     |
| 57_extracted_97012        |          | 1366  | No  | NA | 0  | 0  | Low-quality    | Genome-fragment | 6.23  | 0     |
| 516_vs_10205              | [full]   | 1366  | No  | NA | 1  | 0  | Low-quality    | Genome-fragment | 3.57  | 0     |
| 516_vs_15097              | [full]   | 1366  | No  | NA | 0  | 2  | Low-quality    | Genome-fragment | 0.5   | 0     |
| 514_vs_k141_88218         | [full]   | 2981  | No  | NA | 0  | 1  | Not-determined | Genome-fragment | NA    | 0     |
| 510_vs_98692              | [full]   | 1366  | No  | NA | 1  | 0  | Low-quality    | Genome-fragment | 2.94  | 0     |
| 512_vs_k141_157172        | [full]   | 1366  | No  | NA | 1  | 0  | Low-quality    | Genome-fragment | 10.28 | 0     |
| 58_extracted_k141_186486  |          | 1366  | No  | NA | 0  | 0  | Low-quality    | Genome-fragment | 3.71  | 0     |
| 517_vs_k141_15652         | [full]   | 1367  | No  | NA | 0  | 0  | Low-quality    | Genome-fragment | 3.27  | 0     |
| 514_vs_k141_74599         | [full]   | 1384  | No  | NA | 0  | 0  | Not-determined | Genome-fragment | NA    | 0     |
| 514_vs_k141_14159         | [full]   | 2561  | No  | NA | 0  | 0  | Not-determined | Genome-fragment | NA    | 0     |
| 514_vs_k141_30904         | [full]   | 4240  | No  | NA | 0  | 2  | Not-determined | Genome-fragment | NA    | 0     |
| 517_vs_k141_97077         | [full]   | 1367  | No  | NA | 0  | 0  | Low-quality    | Genome-fragment | 2.94  | 0     |
| 514_vs_k141_111617        | [full]   | 1770  | No  | NA | 0  | 1  | Not-determined | Genome-fragment | NA    | 0     |
| 514_vs_k141_104343        | [full]   | 2671  | No  | NA | 0  | 1  | Not-determined | Genome-fragment | NA    | 0     |
| 511_vs_k141_80040         | [full]   | 1367  | No  | NA |    |    |                |                 |       |       |



|                           |          |        |     |    |       |    |                |                 |                 |       |       |
|---------------------------|----------|--------|-----|----|-------|----|----------------|-----------------|-----------------|-------|-------|
| S14_vx_k141_89631         | [full]   | 2205   | No  | NA | 0     | 3  | Not-determined | Genome-fragment | NA              | 0     | 0     |
| S14_vx_k141_38480         | [full]   | 8999   | No  | NA | 0     | 5  | Not-determined | Genome-fragment | NA              | 0     | 0     |
| S13_vx_k013               | [full]   | 1368   | No  | NA | 1     | 0  | Low-quality    | Genome-fragment | NA              | 1.59  | 0     |
| S14_vx_k141_49820         | [full]   | 1368   | No  | NA | 0     | 0  | Low-quality    | Genome-fragment | NA              | 0.7   | 0     |
| S14_vx_k141_16523         | [full]   | 1420   | No  | NA | 0     | 1  | Not-determined | Genome-fragment | NA              | 0     | 0     |
| S1_extracted_k141_45077   | [full]   | 1368   | No  | NA | 1     | 0  | Low-quality    | Genome-fragment | NA              | 1.38  | 0     |
| S5_vx_k141_54348          | [full]   | 1368   | No  | NA | 0     | 0  | Low-quality    | Genome-fragment | NA              | 3.56  | 0     |
| S5_vx_k141_11145          | [full]   | 1368   | No  | NA | 1     | 0  | Low-quality    | Genome-fragment | NA              | 1.53  | 0     |
| S5_vx_k141_77176          | [full]   | 1368   | No  | NA | 0     | 0  | Low-quality    | Genome-fragment | NA              | 3.2   | 0     |
| S14_vx_k141_53034         | [full]   | 3242   | No  | NA | 0     | 2  | Not-determined | Genome-fragment | NA              | 0     | 0     |
| S16_vx_1124               | [full]   | 1368   | No  | NA | 0     | 0  | Low-quality    | Genome-fragment | NA              | 3.76  | 0     |
| S16_vx_43334              | [full]   | 1368   | No  | NA | 0     | 2  | Low-quality    | Genome-fragment | NA              | 2.18  | 0     |
| S14_vx_k141_115927        | [full]   | 1361   | No  | NA | 0     | 0  | Not-determined | Genome-fragment | NA              | 0     | 0     |
| S14_vx_k141_16562         | [full]   | 5592   | No  | NA | 0     | 1  | Not-determined | Genome-fragment | NA              | 0     | 0     |
| S14_vx_k141_67324         | [full]   | 1290   | No  | NA | 0     | 1  | Not-determined | Genome-fragment | NA              | 0     | 0     |
| S14_vx_k141_31134         | [full]   | 1625   | No  | NA | 0     | 1  | Not-determined | Genome-fragment | NA              | 0     | 0     |
| S10_extracted_48765       | [full]   | 1368   | No  | NA | 1     | 0  | Low-quality    | Genome-fragment | NA              | 2.98  | 0     |
| S14_vx_k141_74925         | [full]   | 4250   | No  | NA | 0     | 1  | Not-determined | Genome-fragment | NA              | 0     | 0     |
| S14_vx_k141_21445         | [full]   | 2042   | No  | NA | 0     | 1  | Not-determined | Genome-fragment | NA              | 0     | 0     |
| S14_vx_k141_60507         | [full]   | 1221   | No  | NA | 0     | 2  | Not-determined | Genome-fragment | NA              | 0     | 0     |
| S10_vx_23883              | [full]   | 1368   | No  | NA | 0     | 1  | Low-quality    | Genome-fragment | NA              | 0.71  | 0     |
| S14_vx_k141_53096         | [full]   | 1354   | No  | NA | 0     | 0  | Not-determined | Genome-fragment | NA              | 0     | 0     |
| S14_vx_k141_82321         | [full]   | 1187   | No  | NA | 0     | 1  | Not-determined | Genome-fragment | NA              | 0     | 0     |
| S14_vx_k141_38581         | [full]   | 4784   | No  | NA | 0     | 0  | Not-determined | Genome-fragment | NA              | 0     | 0     |
| S14_vx_k141_67402         | [full]   | 3438   | No  | NA | 0     | 1  | Not-determined | Genome-fragment | NA              | 2.5   | 0     |
| S8_extracted_k141_53806   | [full]   | 1368   | No  | NA | 0     | 0  | Low-quality    | Genome-fragment | NA              | 3.56  | 0     |
| S11_extracted_k141_98114  | [full]   | 1369   | No  | NA | 0     | 1  | Low-quality    | Genome-fragment | NA              | 0     | 0     |
| S14_vx_k141_38607         | [full]   | 1196   | No  | NA | 0     | 1  | Not-determined | Genome-fragment | NA              | 2.23  | 0     |
| S14_vx_k141_46088         | [full]   | 1369   | No  | NA | 0     | 0  | Low-quality    | Genome-fragment | NA              | 0     | 0     |
| S14_vx_k141_31199         | [full]   | 8760   | No  | NA | 0     | 6  | Not-determined | Genome-fragment | NA              | 0     | 0     |
| S14_vx_k141_89794         | [full]   | 1059   | No  | NA | 0     | 0  | Not-determined | Genome-fragment | NA              | 0     | 0     |
| S14_vx_k141_58451         | [H2gene] | 1369   | No  | NA | 0     | 0  | Low-quality    | Genome-fragment | NA              | 3.31  | 0     |
| S14_vx_k141_75004         | [full]   | 1291   | No  | NA | 0     | 1  | Not-determined | Genome-fragment | NA              | 0     | 0     |
| S14_vx_k141_67439         | [full]   | 1640   | No  | NA | 0     | 0  | Not-determined | Genome-fragment | NA              | 0     | 0     |
| S14_vx_k141_71110         | [full]   | 1369   | No  | NA | 0     | 1  | Low-quality    | Genome-fragment | NA              | 1.39  | 0     |
| S14_vx_k141_104703        | [full]   | 1010   | No  | NA | 0     | 1  | Not-determined | Genome-fragment | NA              | 0     | 0     |
| S3_vx_k141_37197          | [full]   | 1369   | No  | NA | 0     | 1  | Low-quality    | Genome-fragment | NA              | 1.86  | 0     |
| S7_vx_86461               | [full]   | 1369   | No  | NA | 0     | 1  | Low-quality    | Genome-fragment | NA              | 0.63  | 0     |
| S14_vx_k141_31221         | [full]   | 1946   | No  | NA | 0     | 1  | Not-determined | Genome-fragment | NA              | 1.08  | 0     |
| S16_extracted_38579       | [full]   | 1369   | No  | NA | 0     | 2  | Low-quality    | Genome-fragment | NA              | 0     | 0     |
| S14_vx_k141_75014         | [full]   | 20775  | No  | NA | 0     | 10 | Not-determined | Genome-fragment | NA              | 3.19  | 0     |
| S16_vx_55076              | [full]   | 1369   | No  | NA | 0     | 0  | Low-quality    | Genome-fragment | NA              | 0     | 0     |
| S14_vx_k141_82401         | [full]   | 1330   | No  | NA | 0     | 2  | Not-determined | Genome-fragment | NA              | 0     | 0     |
| S14_vx_k141_31231         | [full]   | 2687   | No  | NA | 0     | 3  | Not-determined | Genome-fragment | NA              | 0     | 0     |
| S10_vx_84953              | [full]   | 1369   | No  | NA | 0     | 0  | Low-quality    | Genome-fragment | NA              | 1.88  | 0     |
| S14_vx_k141_43387         | [full]   | 2212   | No  | NA | 0     | 3  | Not-determined | Genome-fragment | NA              | 0     | 0     |
| S14_vx_k141_16694         | [full]   | 2897   | No  | NA | 0     | 1  | Not-determined | Genome-fragment | NA              | 1.7   | 0     |
| S12_vx_k141_146677        | [H2gene] | 1369   | No  | NA | 1     | 0  | Low-quality    | Genome-fragment | NA              | 1.67  | 0     |
| S8_vx_k141_139715         | [full]   | 1369   | No  | NA | 0     | 0  | Low-quality    | Genome-fragment | NA              | 1.4   | 0     |
| S14_vx_k141_31314         | [full]   | 1682   | No  | NA | 0     | 0  | Not-determined | Genome-fragment | NA              | 0     | 0     |
| S14_vx_k141_23710         | [full]   | 2952   | No  | NA | 0     | 2  | Not-determined | Genome-fragment | NA              | 99.28 | 0     |
| S14_vx_k141_112088        | [full]   | 44297  | No  | NA | 16    | 0  | High-quality   | Genome-fragment | NA              | 2.23  | 0     |
| S17_vx_k141_97177         | [full]   | 1370   | No  | NA | 1     | 0  | Low-quality    | Genome-fragment | NA              | 0     | 0     |
| S14_vx_k141_16759         | [full]   | 1007   | No  | NA | 0     | 0  | Not-determined | Genome-fragment | NA              | 0     | 0     |
| S14_vx_k141_16763         | [full]   | 1605   | No  | NA | 0     | 0  | Not-determined | Genome-fragment | NA              | 2.28  | 0     |
| S9_extracted_k141_60412   | [full]   | 1370   | No  | NA | 2     | 0  | Low-quality    | Genome-fragment | NA              | 0     | 0     |
| S14_vx_k141_53298         | [full]   | 2001   | No  | NA | 0     | 3  | Not-determined | Genome-fragment | NA              | 0     | 0     |
| S14_vx_k141_67541         | [full]   | 3281   | No  | NA | 0     | 1  | Not-determined | Genome-fragment | NA              | 2.44  | 0     |
| S9_vx_k141_1741           | [full]   | 1370   | No  | NA | 0     | 0  | Low-quality    | Genome-fragment | NA              | 1.98  | 0     |
| S11_vx_k141_94531         | [full]   | 1370   | No  | NA | 0     | 1  | Low-quality    | Genome-fragment | NA              | 1.84  | 0     |
| S1_vx_k141_113503         | [full]   | 1370   | No  | NA | 1     | 0  | Low-quality    | Genome-fragment | NA              | 1.95  | 0     |
| S3_extracted_k141_45313   | [full]   | 1370   | No  | NA | 0     | 0  | Low-quality    | Genome-fragment | NA              | 2.21  | 0     |
| S5_vx_k141_1297           | [full]   | 1370   | No  | NA | 0     | 0  | Low-quality    | Genome-fragment | NA              | 0     | 0     |
| S14_vx_k141_104835        | [full]   | 1006   | No  | NA | 0     | 0  | Not-determined | Genome-fragment | NA              | 2.22  | 0     |
| S14_vx_k141_53111         | [full]   | 2002   | No  | NA | 0     | 3  | Not-determined | Genome-fragment | NA              | 3.31  | 0     |
| S14_vx_k141_104841        | [full]   | 1965   | No  | NA | 0     | 0  | Not-determined | Genome-fragment | NA              | 0.86  | 0     |
| S7_extracted_100935       | [full]   | 1370   | No  | NA | 0     | 0  | Low-quality    | Genome-fragment | NA              | 0.52  | 0     |
| S7_vx_88748               | [H2gene] | 1370   | No  | NA | 1     | 0  | Low-quality    | Genome-fragment | NA              | 2     | 0     |
| S16_vx_108065             | [full]   | 1370   | No  | NA | 0     | 0  | Low-quality    | Genome-fragment | NA              | 0.87  | 0     |
| S12_vx_k141_31787         | [full]   | 1370   | No  | NA | 1     | 0  | Low-quality    | Genome-fragment | NA              | 2.96  | 0     |
| S6_extracted_k141_52258   | [full]   | 1370   | No  | NA | 0     | 0  | Low-quality    | Genome-fragment | NA              | 72.3  | 0     |
| S14_vx_k141_67601         | [full]   | 3822   | No  | NA | 1     | 2  | Not-determined | Genome-fragment | NA              | 3.61  | 0     |
| S8_extracted_k141_122766  | [full]   | 1370   | No  | NA | 1     | 0  | Low-quality    | Genome-fragment | NA              | 0     | 0     |
| S8_extracted_k141_149318  | [full]   | 1370   | No  | NA | 0     | 0  | Low-quality    | Genome-fragment | NA              | 2.9   | 0     |
| S17_vx_k141_144567        | [full]   | 1371   | No  | NA | 0     | 1  | Not-determined | Genome-fragment | NA              | 0     | 0     |
| S14_vx_k141_45534         | [full]   | 2778   | No  | NA | 1     | 0  | Not-determined | Genome-fragment | NA              | 0     | 0     |
| S14_vx_k141_38905         | [full]   | 29314  | No  | NA | 12    | 1  | Medium-quality | Genome-fragment | NA              | 0     | 0     |
| S11_vx_k141_52317         | [full]   | 1371   | No  | NA | 0     | 0  | Low-quality    | Genome-fragment | NA              | 0     | 0     |
| S14_vx_k141_23805         | [full]   | 1706   | No  | NA | 0     | 2  | Not-determined | Genome-fragment | NA              | 0     | 0     |
| S14_vx_k141_53419         | [full]   | 2993   | No  | NA | 0     | 4  | Not-determined | Genome-fragment | NA              | 0     | 0     |
| S14_vx_k141_1828          | [full]   | 1316   | No  | NA | 0     | 0  | Not-determined | Genome-fragment | NA              | 4.54  | 0     |
| S14_extracted_k141_21403  | [full]   | 1371   | No  | NA | 0     | 0  | Low-quality    | Genome-fragment | NA              | 1.39  | 0     |
| S11_extracted_k141_102536 | [full]   | 1371   | No  | NA | 0     | 0  | Low-quality    | Genome-fragment | NA              | 2.7   | 0     |
| S5_vx_k141_97188          | [full]   | 1371   | No  | NA | 0     | 0  | Low-quality    | Genome-fragment | NA              | 3.12  | 0     |
| S7_extracted_67454        | [full]   | 1371   | No  | NA | 2     | 0  | Low-quality    | Genome-fragment | NA              | 3.2   | 0     |
| S14_vx_k141_67670         | [full]   | 2697   | No  | NA | 0     | 0  | Not-determined | Genome-fragment | NA              | 0     | 0     |
| S7_vx_12292               | [full]   | 1371   | No  | NA | 0     | 0  | Low-quality    | Genome-fragment | NA              | 0     | 0     |
| S14_vx_k141_43610         | [full]   | 2650   | No  | NA | 0     | 0  | Not-determined | Genome-fragment | NA              | 3.09  | 0     |
| S7_vx_31331               | [H2gene] | 1371   | No  | NA | 1     | 0  | Low-quality    | Genome-fragment | NA              | 2.2   | 0     |
| S12_extracted_k141_58716  | [full]   | 1371   | No  | NA | 0     | 0  | Low-quality    | Genome-fragment | NA              | 60.28 | 79.69 |
| S14_vx_k141_9162          | [full]   | 102634 | Yes | NA | 20846 | 16 | 57             | Medium-quality  | Genome-fragment | NA    | 0     |
| S14_vx_k141_67727         | [full]   | 1070   | No  | NA | 0     | 0  | Low-quality    | Genome-fragment | NA              | 2.26  | 0     |
| S6_vx_k141_38247          | [full]   | 1371   | No  | NA | 0     | 0  | Low-quality    | Genome-fragment | NA              | 2.75  | 0     |
| S8_vx_k141_156209         | [full]   | 1371   | No  | NA | 0     | 2  | Low-quality    | Genome-fragment | NA              | 0     | 0     |
| S14_vx_k141_112176        | [full]   | 1077   | No  | NA | 1     | 0  | Not-determined | Genome-fragment | NA              | 0     | 0     |
| S14_vx_k141_53490         | [full]   | 7848   | No  | NA | 0     | 4  | Not-determined | Genome-fragment | NA              | 0     | 0     |
| S8_vx_k141_141534         | [full]   | 1371   | No  | NA | 0     | 0  | Low-quality    | Genome-fragment | NA              | 3.09  | 0     |
| S9_vx_k141_81303          | [full]   | 1372   | No  | NA | 2     | 0  | Low-quality    | Genome-fragment | NA              | 3.49  | 0     |
| S14_extracted_k141_116897 | [full]   | 1372   | No  | NA | 0     | 0  | Low-quality    | Genome-fragment | NA              | 1.83  | 0     |
| S14_vx_k141_11785         | [H2gene] | 1372   | No  | NA | 0     | 0  | Low-quality    | Genome-fragment | NA              | 2.91  | 0     |
| S1_vx_k141_85411          | [full]   | 1372   | No  | NA | 0     | 2  | Low-quality    | Genome-fragment | NA              | 2.29  | 0     |
| S5_vx_k141_124024         | [full]   | 1372   | No  | NA | 0     | 0  | Low-quality    | Genome-fragment | NA              | 0     | 0     |
| S5_vx_k141_11792          | [full]   | 1372   | No  | NA | 0     | 0  | Low-quality    | Genome-fragment | NA              | 2.49  | 0     |
| S14_vx_k141_96959         | [full]   | 5171   | No  | NA | 0     | 0  | Not-determined | Genome-fragment | NA              | 0.48  | 0     |
| S14_vx_k141_105116        | [full]   | 2820   | No  | NA | 0     | 2  | Not-determined | Genome-fragment | NA              | 0     | 0     |
| S14_vx_k141_53567         | [full]   | 5575   | No  | NA | 0     | 3  | Not-determined | Genome-fragment | NA              | 0     | 0     |
| S16_extracted_66212       | [full]   | 1372   | No  | NA | 1     | 0  | Low-quality    | Genome-fragment | NA              | 2     | 0     |
| S14_vx_k141_90123         | [full]   | 6521   | No  | NA | 0     | 1  | Not-determined | Genome-fragment | NA              | 2.6   | 0     |
| S14_vx_k141_9386          | [full]   | 3885   | No  | NA | 0     | 5  | Not-determined | Genome-fragment | NA              | 67.86 | 0     |
| S16_extracted_113444      | [full]   | 1372   | No  | NA | 0     | 0  | Low-quality    | Genome-fragment | NA              | 2.15  | 0     |
| S14_vx_k141_112252        | [full]   | 22565  | No  | NA | 11    | 0  | Medium-quality | Genome-fragment | NA              | 2.13  | 0     |
| S16_extracted_153405      | [full]   | 1372   | No  | NA | 0     | 0  | Low-quality    | Genome-fragment | NA              | 2.73  | 0     |
| S16_vx_47675              | [full]   | 1372   | No  | NA | 0     | 0  | Low-quality    | Genome-fragment | NA              | 1.95  | 0     |
| S16_vx_55725              | [full]   | 1372   | No  | NA | 2     | 0  | Low-quality    | Genome-fragment | NA              | 0     | 0     |
| S16_vx_54098              | [full]   | 1372   | No  | NA | 0     | 0  | Low-quality    | Genome-fragment | NA              | 0     | 0     |
| S14_vx_k141_60862         | [full]   | 1411   | No  | NA | 0     | 2  | Not-determined | Genome-fragment | NA              | 0     | 0     |
| S14_vx_k141_31464         | [full]   | 2955   | No  | NA | 0     | 1  | Not-determined | Genome-fragment | NA              | 0     | 0     |
| S14_vx_k141_53611         | [full]   | 3930   | No  | NA | 0     | 1  | Not-determined | Genome-fragment | NA              | 2.31  | 0     |
| S10_extracted_57122       | [full]   | 1372   | No  | NA | 0     | 0  | Low-quality    | Genome-fragment | NA              | 1.79  | 0     |
| S14_vx_k141_75419         | [full]   | 2364   | No  | NA | 0     | 2  | Not-determined | Genome-fragment | NA              | 0     | 0     |
| S10_vx_16050              | [full]   | 1372   | No  | NA | 1     | 0  | Low-quality    | Genome-fragment | NA              | 0     | 0     |
| S10_vx_78305              | [H2gene] | 1372   | No  | NA | 0     | 0  | Low-quality    | Genome-fragment | NA              | 0     | 0     |
| S14_vx_k141_60904         | [full]   | 1796   | No  | NA | 0     | 0  | Not-determined | Genome-fragment | NA              | 2.49  | 0     |
| S15_vx_16308              | [full]   | 1372   | No  | NA | 0     | 0  | Low-quality    | Genome-fragment | NA              | 0.48  | 0     |
| S6_extracted_k141_25186   | [full]   | 1372   | No  | NA | 0     | 0  | Low-quality    | Genome-fragment | NA              | 0.89  | 0     |
| S8_extracted_k141_7244    | [full]   | 1372   | No  | NA | 1     | 0  | Low-quality    | Genome-fragment | NA              | 0     | 0     |
| S14_vx_k141_75475         | [full]   | 1739   | No  | NA | 0     | 0  | Not-determined | Genome-fragment | NA              | 0.79  |       |



|                           |           |       |    |    |   |    |                |                 |    |       |   |
|---------------------------|-----------|-------|----|----|---|----|----------------|-----------------|----|-------|---|
| S14_vx_k141_973241        | [full]    | 1882  | No | NA | 0 | 0  | Not-determined | Genome-fragment | NA | 0     | 0 |
| S14_vx_k141_110111        | [full]    | 1374  | No | NA | 0 | 0  | Low-quality    | Genome-fragment | NA | 3     | 0 |
| S14_vx_k141_112522        | [full]    | 2080  | No | NA | 0 | 1  | Not-determined | Genome-fragment | NA | 0     | 0 |
| S14_vx_k141_611141        | [full]    | 1126  | No | NA | 0 | 1  | Not-determined | Genome-fragment | NA | 0     | 0 |
| S14_vx_k141_317251        | [full]    | 4332  | No | NA | 0 | 2  | Not-determined | Genome-fragment | NA | 0     | 0 |
| S14_vx_k141_973481        | [full]    | 5442  | No | NA | 0 | 1  | Not-determined | Genome-fragment | NA | 0     | 0 |
| S14_vx_k141_702461        | [full]    | 1374  | No | NA | 1 | 0  | Low-quality    | Genome-fragment | NA | 2.75  | 0 |
| S3_extracted_k141_73283   | [full]    | 1374  | No | NA | 1 | 0  | Low-quality    | Genome-fragment | NA | 2.21  | 0 |
| S14_vx_k141_973521        | [full]    | 2232  | No | NA | 0 | 0  | Not-determined | Genome-fragment | NA | 0     | 0 |
| S14_vx_k141_317321        | [full]    | 1951  | No | NA | 0 | 2  | Not-determined | Genome-fragment | NA | 0     | 0 |
| S16_vx_1700741            | [full]    | 1374  | No | NA | 1 | 0  | Low-quality    | Genome-fragment | NA | 0.8   | 0 |
| S10_vx_244381             | [1/2]gene | 1374  | No | NA | 0 | 0  | Low-quality    | Genome-fragment | NA | 2.6   | 0 |
| S14_vx_k141_758081        | [full]    | 5698  | No | NA | 0 | 3  | Not-determined | Genome-fragment | NA | 0     | 0 |
| S2_extracted_k141_115527  | [full]    | 1374  | No | NA | 1 | 0  | Low-quality    | Genome-fragment | NA | 4.53  | 0 |
| S14_vx_k141_973711        | [full]    | 2114  | No | NA | 0 | 2  | Not-determined | Genome-fragment | NA | 0     | 0 |
| S8_vx_k141_1766611        | [full]    | 1374  | No | NA | 0 | 0  | Low-quality    | Genome-fragment | NA | 3.03  | 0 |
| S14_vx_k141_538541        | [full]    | 9579  | No | NA | 0 | 6  | Not-determined | Genome-fragment | NA | 0     | 0 |
| S14_vx_k141_538571        | [full]    | 2562  | No | NA | 0 | 3  | Not-determined | Genome-fragment | NA | 0     | 0 |
| S14_vx_k141_317681        | [full]    | 1004  | No | NA | 0 | 0  | Not-determined | Genome-fragment | NA | 0     | 0 |
| S1_vx_k141_327531         | [full]    | 1375  | No | NA | 0 | 1  | Low-quality    | Genome-fragment | NA | 0.86  | 0 |
| S1_vx_k141_54461          | [full]    | 1375  | No | NA | 0 | 1  | Low-quality    | Genome-fragment | NA | 1.35  | 0 |
| S14_vx_k141_172871        | [full]    | 4161  | No | NA | 0 | 3  | Not-determined | Genome-fragment | NA | 0     | 0 |
| S3_vx_k141_978631         | [full]    | 1375  | No | NA | 2 | 0  | Low-quality    | Genome-fragment | NA | 2.78  | 0 |
| S5_vx_k141_728781         | [full]    | 1375  | No | NA | 0 | 0  | Low-quality    | Genome-fragment | NA | 1.17  | 0 |
| S5_vx_k141_1098951        | [full]    | 1375  | No | NA | 2 | 0  | Low-quality    | Genome-fragment | NA | 2.87  | 0 |
| S5_vx_k141_613381         | [1/2]gene | 1375  | No | NA | 1 | 0  | Low-quality    | Genome-fragment | NA | 2.75  | 0 |
| S16_vx_439571             | [full]    | 1375  | No | NA | 0 | 0  | Low-quality    | Genome-fragment | NA | 2.87  | 0 |
| S14_vx_k141_318111        | [full]    | 5106  | No | NA | 0 | 1  | Not-determined | Genome-fragment | NA | 0     | 0 |
| S16_vx_1102181            | [full]    | 1375  | No | NA | 0 | 0  | Low-quality    | Genome-fragment | NA | 2.24  | 0 |
| S14_vx_k141_22941         | [full]    | 1221  | No | NA | 0 | 0  | Not-determined | Genome-fragment | NA | 0     | 0 |
| S10_vx_545381             | [full]    | 1375  | No | NA | 0 | 1  | Low-quality    | Genome-fragment | NA | 2.33  | 0 |
| S10_vx_1141381            | [1/2]gene | 1375  | No | NA | 0 | 0  | Low-quality    | Genome-fragment | NA | 1.81  | 0 |
| S14_vx_k141_974291        | [full]    | 3446  | No | NA | 0 | 1  | Not-determined | Genome-fragment | NA | 0     | 0 |
| S14_vx_k141_97021         | [full]    | 3884  | No | NA | 0 | 0  | Not-determined | Genome-fragment | NA | 0     | 0 |
| S14_vx_k141_97041         | [full]    | 1377  | No | NA | 0 | 0  | Not-determined | Genome-fragment | NA | 0     | 0 |
| S14_vx_k141_105361        | [full]    | 1161  | No | NA | 0 | 1  | Not-determined | Genome-fragment | NA | 0     | 0 |
| S14_vx_k141_683181        | [full]    | 2322  | No | NA | 0 | 1  | Not-determined | Genome-fragment | NA | 0     | 0 |
| S14_vx_k141_1055491       | [full]    | 1169  | No | NA | 0 | 1  | Not-determined | Genome-fragment | NA | 0     | 0 |
| S12_vx_k141_176731        | [full]    | 1375  | No | NA | 0 | 0  | Low-quality    | Genome-fragment | NA | 3.26  | 0 |
| S14_vx_k141_759651        | [full]    | 2251  | No | NA | 0 | 1  | Not-determined | Genome-fragment | NA | 0     | 0 |
| S14_vx_k141_759671        | [full]    | 1242  | No | NA | 0 | 1  | Not-determined | Genome-fragment | NA | 0     | 0 |
| S2_vx_k141_50551          | [1/2]gene | 1375  | No | NA | 0 | 0  | Low-quality    | Genome-fragment | NA | 2.6   | 0 |
| S14_vx_k141_318461        | [full]    | 34007 | No | NA | 0 | 16 | Not-determined | Genome-fragment | NA | 0     | 0 |
| S4_extracted_6710         | [full]    | 1375  | No | NA | 0 | 1  | Low-quality    | Genome-fragment | NA | 3.25  | 0 |
| S14_vx_k141_318481        | [full]    | 2062  | No | NA | 0 | 2  | Not-determined | Genome-fragment | NA | 0     | 0 |
| S8_vx_k141_158501         | [full]    | 1375  | No | NA | 0 | 0  | Low-quality    | Genome-fragment | NA | 3.19  | 0 |
| S8_vx_k141_725131         | [full]    | 1375  | No | NA | 0 | 1  | Low-quality    | Genome-fragment | NA | 2.02  | 0 |
| S9_vx_k141_161851         | [1/2]gene | 1376  | No | NA | 1 | 0  | Low-quality    | Genome-fragment | NA | 1.26  | 0 |
| S13_extracted_11453       | [full]    | 1376  | No | NA | 0 | 0  | Low-quality    | Genome-fragment | NA | 2.31  | 0 |
| S14_vx_k141_684071        | [full]    | 1705  | No | NA | 0 | 0  | Not-determined | Genome-fragment | NA | 0     | 0 |
| S14_vx_k141_243561        | [full]    | 2308  | No | NA | 0 | 1  | Not-determined | Genome-fragment | NA | 0     | 0 |
| S14_vx_k141_540001        | [full]    | 1450  | No | NA | 0 | 2  | Not-determined | Genome-fragment | NA | 0     | 0 |
| S14_vx_k141_605181        | [full]    | 1376  | No | NA | 0 | 0  | Low-quality    | Genome-fragment | NA | 3.47  | 0 |
| S14_vx_k141_494031        | [full]    | 1376  | No | NA | 1 | 0  | Low-quality    | Genome-fragment | NA | 2.09  | 0 |
| S1_vx_k141_1469221        | [full]    | 1376  | No | NA | 0 | 0  | Low-quality    | Genome-fragment | NA | 2.81  | 0 |
| S14_vx_k141_263801        | [full]    | 1635  | No | NA | 0 | 1  | Not-determined | Genome-fragment | NA | 0     | 0 |
| S1_vx_k141_1198981        | [full]    | 1376  | No | NA | 1 | 0  | Low-quality    | Genome-fragment | NA | 0.87  | 0 |
| S14_vx_k141_23831         | [full]    | 2456  | No | NA | 0 | 1  | Not-determined | Genome-fragment | NA | 0     | 0 |
| S14_vx_k141_684531        | [full]    | 1130  | No | NA | 0 | 0  | Not-determined | Genome-fragment | NA | 0     | 0 |
| S5_vx_k141_537581         | [full]    | 1376  | No | NA | 0 | 0  | Low-quality    | Genome-fragment | NA | 1.81  | 0 |
| S14_vx_k141_315171        | [full]    | 7512  | No | NA | 0 | 6  | Not-determined | Genome-fragment | NA | 0     | 0 |
| S5_vx_k141_809021         | [full]    | 1376  | No | NA | 0 | 0  | Low-quality    | Genome-fragment | NA | 2.98  | 0 |
| S5_vx_k141_666181         | [full]    | 1376  | No | NA | 1 | 0  | Low-quality    | Genome-fragment | NA | 3.1   | 0 |
| S14_vx_k141_684701        | [full]    | 6116  | No | NA | 0 | 7  | Not-determined | Genome-fragment | NA | 0     | 0 |
| S16_vx_1074261            | [full]    | 1376  | No | NA | 1 | 1  | Low-quality    | Genome-fragment | NA | 1.93  | 0 |
| S16_vx_1079161            | [full]    | 1376  | No | NA | 3 | 0  | Low-quality    | Genome-fragment | NA | 3.22  | 0 |
| S10_vx_200871             | [full]    | 1376  | No | NA | 0 | 0  | Low-quality    | Genome-fragment | NA | 3.84  | 0 |
| S12_extracted_k141_98132  | [full]    | 1376  | No | NA | 0 | 1  | Low-quality    | Genome-fragment | NA | 1.42  | 0 |
| S12_vx_k141_711221        | [full]    | 1376  | No | NA | 0 | 0  | Low-quality    | Genome-fragment | NA | 2.34  | 0 |
| S14_vx_k141_1056341       | [full]    | 2820  | No | NA | 0 | 0  | Not-determined | Genome-fragment | NA | 0     | 0 |
| S11_extracted_k141_165151 | [full]    | 1377  | No | NA | 0 | 0  | Low-quality    | Genome-fragment | NA | 1.74  | 0 |
| S11_extracted_k141_90601  | [full]    | 1377  | No | NA | 0 | 0  | Low-quality    | Genome-fragment | NA | 1.54  | 0 |
| S14_vx_k141_833471        | [full]    | 3204  | No | NA | 0 | 2  | Not-determined | Genome-fragment | NA | 0     | 0 |
| S14_extracted_k141_70783  | [full]    | 1377  | No | NA | 0 | 0  | Low-quality    | Genome-fragment | NA | 3.58  | 0 |
| S14_vx_k141_1056721       | [full]    | 1755  | No | NA | 0 | 0  | Not-determined | Genome-fragment | NA | 0     | 0 |
| S14_vx_k141_613021        | [full]    | 1366  | No | NA | 0 | 1  | Not-determined | Genome-fragment | NA | 0     | 0 |
| S14_vx_k141_25231         | [full]    | 2604  | No | NA | 0 | 2  | Not-determined | Genome-fragment | NA | 0     | 0 |
| S14_vx_k141_833741        | [full]    | 1167  | No | NA | 0 | 0  | Not-determined | Genome-fragment | NA | 0     | 0 |
| S14_vx_k141_976641        | [full]    | 1798  | No | NA | 0 | 0  | Not-determined | Genome-fragment | NA | 0     | 0 |
| S14_vx_k141_396021        | [full]    | 1517  | No | NA | 0 | 2  | Not-determined | Genome-fragment | NA | 0     | 0 |
| S14_vx_k141_324971        | [full]    | 1377  | No | NA | 0 | 0  | Low-quality    | Genome-fragment | NA | 2.4   | 0 |
| S1_extracted_k141_137327  | [full]    | 1377  | No | NA | 0 | 0  | Low-quality    | Genome-fragment | NA | 2.15  | 0 |
| S3_vx_k141_1144781        | [full]    | 1377  | No | NA | 1 | 0  | Low-quality    | Genome-fragment | NA | 2.57  | 0 |
| S5_extracted_k141_11534   | [full]    | 1377  | No | NA | 0 | 0  | Low-quality    | Genome-fragment | NA | 0.52  | 0 |
| S5_vx_k141_187631         | [1/2]gene | 1377  | No | NA | 0 | 0  | Low-quality    | Genome-fragment | NA | 3.19  | 0 |
| S5_vx_k141_1430571        | [1/2]gene | 1377  | No | NA | 2 | 0  | Low-quality    | Genome-fragment | NA | 2.96  | 0 |
| S7_vx_289551              | [full]    | 1377  | No | NA | 0 | 0  | Low-quality    | Genome-fragment | NA | 0.75  | 0 |
| S14_vx_k141_220511        | [full]    | 1199  | No | NA | 0 | 0  | Not-determined | Genome-fragment | NA | 0     | 0 |
| S16_vx_1705511            | [full]    | 1377  | No | NA | 0 | 0  | Low-quality    | Genome-fragment | NA | 2.88  | 0 |
| S12_extracted_k141_154730 | [full]    | 1377  | No | NA | 0 | 0  | Low-quality    | Genome-fragment | NA | 1.96  | 0 |
| S14_vx_k141_1128001       | [full]    | 1117  | No | NA | 0 | 2  | Not-determined | Genome-fragment | NA | 0     | 0 |
| S14_vx_k141_1057391       | [full]    | 1273  | No | NA | 0 | 1  | Not-determined | Genome-fragment | NA | 0     | 0 |
| S14_vx_k141_175741        | [full]    | 1959  | No | NA | 0 | 2  | Not-determined | Genome-fragment | NA | 0     | 0 |
| S12_vx_k141_813361        | [full]    | 1377  | No | NA | 2 | 0  | Low-quality    | Genome-fragment | NA | 3.02  | 0 |
| S12_vx_k141_1843601       | [full]    | 1377  | No | NA | 3 | 0  | Low-quality    | Genome-fragment | NA | 1.83  | 0 |
| S12_vx_k141_907361        | [full]    | 1377  | No | NA | 0 | 0  | Low-quality    | Genome-fragment | NA | 3.45  | 0 |
| S15_vx_639551             | [full]    | 1377  | No | NA | 0 | 0  | Low-quality    | Genome-fragment | NA | 3.03  | 0 |
| S8_extracted_k141_18023   | [full]    | 1377  | No | NA | 2 | 0  | Low-quality    | Genome-fragment | NA | 21.6  | 0 |
| S8_extracted_k141_177074  | [full]    | 1377  | No | NA | 0 | 0  | Low-quality    | Genome-fragment | NA | 1.99  | 0 |
| S17_vx_k141_504951        | [full]    | 1378  | No | NA | 0 | 1  | Low-quality    | Genome-fragment | NA | 0.84  | 0 |
| S14_vx_k141_834881        | [full]    | 3065  | No | NA | 0 | 2  | Not-determined | Genome-fragment | NA | 2.42  | 0 |
| S9_extracted_k141_37803   | [full]    | 1378  | No | NA | 0 | 0  | Low-quality    | Genome-fragment | NA | 0     | 0 |
| S14_vx_k141_686701        | [full]    | 1498  | No | NA | 0 | 1  | Not-determined | Genome-fragment | NA | 0     | 0 |
| S14_vx_k141_543611        | [full]    | 5517  | No | NA | 0 | 4  | Not-determined | Genome-fragment | NA | 0     | 0 |
| S11_vx_k141_431151        | [full]    | 1378  | No | NA | 0 | 0  | Low-quality    | Genome-fragment | NA | 2.75  | 0 |
| S14_vx_k141_176521        | [full]    | 1193  | No | NA | 0 | 0  | Not-determined | Genome-fragment | NA | 0     | 0 |
| S13_vx_1003081            | [full]    | 1378  | No | NA | 2 | 0  | Low-quality    | Genome-fragment | NA | 2.3   | 0 |
| S14_vx_k141_909101        | [full]    | 2032  | No | NA | 0 | 0  | Not-determined | Genome-fragment | NA | 0     | 0 |
| S14_vx_k141_614001        | [full]    | 2894  | No | NA | 0 | 2  | Not-determined | Genome-fragment | NA | 0     | 0 |
| S14_vx_k141_614201        | [full]    | 1443  | No | NA | 0 | 1  | Not-determined | Genome-fragment | NA | 0     | 0 |
| S14_vx_k141_763421        | [full]    | 3893  | No | NA | 0 | 2  | Not-determined | Genome-fragment | NA | 0     | 0 |
| S14_vx_k141_176681        | [full]    | 5466  | No | NA | 0 | 0  | Not-determined | Genome-fragment | NA | 0     | 0 |
| S14_vx_k141_397841        | [full]    | 5300  | No | NA | 0 | 3  | Not-determined | Genome-fragment | NA | 0     | 0 |
| S14_vx_k141_614451        | [full]    | 1783  | No | NA | 0 | 1  | Not-determined | Genome-fragment | NA | 0     | 0 |
| S1_vx_k141_1057411        | [full]    | 1378  | No | NA | 0 | 1  | Low-quality    | Genome-fragment | NA | 0.67  | 0 |
| S14_vx_k141_176951        | [full]    | 1995  | No | NA | 0 | 3  | Not-determined | Genome-fragment | NA | 0     | 0 |
| S1_vx_k141_257001         | [1/2]gene | 1378  | No | NA | 1 | 0  | Low-quality    | Genome-fragment | NA | 2.26  | 0 |
| S2_vx_k141_195511         | [full]    | 1378  | No | NA | 0 | 0  | Low-quality    | Genome-fragment | NA | 2.15  | 0 |
| S14_vx_k141_909341        | [full]    | 37471 | No | NA | 5 | 1  | High-quality   | Genome-fragment | NA | 98.98 | 0 |
| S5_extracted_k141_145298  | [full]    | 1378  | No | NA | 0 | 0  | Low-quality    | Genome-fragment | NA | 2.86  | 0 |
| S14_vx_k141_1058661       | [full]    | 3237  | No | NA | 0 | 4  | Not-determined | Genome-fragment | NA | 0     | 0 |
| S5_vx_k141_572201         | [full]    | 1378  | No | NA | 0 | 0  | Low-quality    | Genome-fragment | NA | 3.44  | 0 |
| S5_vx_k141_673331         | [full]    | 1378  | No | NA | 1 | 0  | Low-quality    | Genome-fragment | NA | 3.67  | 0 |
| S5_vx_k141_242721         | [1/2]gene | 1378  | No | NA | 1 | 0  | Low-quality    | Genome-fragment | NA | 2.01  | 0 |
| S14_vx_k141_1129641       | [full]    | 2506  | No | NA | 0 | 2  | Not-determined | Genome-fragment | NA | 0     | 0 |
| S14_vx_k141_614871        | [full]    | 21    |    |    |   |    |                |                 |    |       |   |



|                           |          |       |     |       |    |    |                |                 |    |       |       |
|---------------------------|----------|-------|-----|-------|----|----|----------------|-----------------|----|-------|-------|
| S14_vx_k141_61529         | [full]   | 1407  | No  | NA    | 0  | 2  | Not-determined | Genome-fragment | NA | 0     |       |
| S14_vx_k141_63875         | [full]   | 5690  | No  | NA    | 0  | 4  | Not-determined | Genome-fragment | NA | 0     |       |
| S14_vx_k141_68974         | [full]   | 2394  | No  | NA    | 0  | 1  | Not-determined | Genome-fragment | NA | 0     |       |
| S14_extracted_k141_116320 |          | 1381  | No  | NA    | 0  | 0  | Low-quality    | Genome-fragment | NA | 2.35  | 0     |
| S14_vx_k141_113085        | [full]   | 12500 | No  | NA    | 0  | 5  | Not-determined | Genome-fragment | NA | 0     |       |
| S14_vx_k141_46693         | [full]   | 3578  | No  | NA    | 0  | 1  | Not-determined | Genome-fragment | NA | 0     |       |
| S14_vx_k141_61530         | [full]   | 30159 | No  | NA    | 15 | 0  | Medium-quality | Genome-fragment | NA | 89.33 | 0     |
| S14_vx_k141_2870          | [full]   | 88314 | Yes | 46524 | 30 | 19 | Medium-quality | Genome-fragment | NA | 86.01 | 47.32 |
| S14_vx_k141_24522         | [full]   | 1973  | No  | NA    | 0  | 0  | Not-determined | Genome-fragment | NA | 0     |       |
| S14_vx_k141_106136        | [full]   | 1920  | No  | NA    | 0  | 1  | Not-determined | Genome-fragment | NA | 0     |       |
| S14_vx_k141_17906         | [full]   | 2916  | No  | NA    | 0  | 1  | Not-determined | Genome-fragment | NA | 0     |       |
| S14_vx_k141_107252        | [full]   | 1381  | No  | NA    | 1  | 0  | Low-quality    | Genome-fragment | NA | 2.95  | 0     |
| S14_vx_k141_11792         | [full]   | 1381  | No  | NA    | 0  | 0  | Low-quality    | Genome-fragment | NA | 3.16  | 0     |
| S14_vx_k141_76700         | [full]   | 3812  | No  | NA    | 0  | 5  | Not-determined | Genome-fragment | NA | 0     |       |
| S1_extracted_k141_108885  |          | 1381  | No  | NA    | 0  | 0  | Low-quality    | Genome-fragment | NA | 2.58  | 0     |
| S14_vx_k141_24991         | [full]   | 1381  | No  | 27007 | 11 | 3  | High-quality   | Genome-fragment | NA | 100   | 65.67 |
| S14_vx_k141_24969         | [full]   | 1705  | No  | NA    | 0  | 0  | Not-determined | Genome-fragment | NA | 0     |       |
| S14_vx_k141_61629         | [full]   | 1599  | No  | NA    | 0  | 0  | Not-determined | Genome-fragment | NA | 0     |       |
| S14_vx_k141_25522         | [full]   | 1856  | No  | NA    | 0  | 0  | Not-determined | Genome-fragment | NA | 0     |       |
| S14_vx_k141_113169        | [full]   | 1691  | No  | NA    | 0  | 0  | Not-determined | Genome-fragment | NA | 0     |       |
| S1_vx_k141_98109          | [full]   | 1381  | No  | NA    | 1  | 0  | Low-quality    | Genome-fragment | NA | 3.92  | 0     |
| S14_vx_k141_61662         | [full]   | 1136  | No  | NA    | 0  | 1  | Not-determined | Genome-fragment | NA | 0     |       |
| S14_vx_k141_61668         | [full]   | 1581  | No  | NA    | 0  | 1  | Not-determined | Genome-fragment | NA | 0     |       |
| S3_vx_k141_1664           | [full]   | 1381  | No  | NA    | 0  | 0  | Low-quality    | Genome-fragment | NA | 2.68  | 0     |
| S7_vx_69475               | [full]   | 1381  | No  | NA    | 3  | 0  | Low-quality    | Genome-fragment | NA | 3.82  | 0     |
| S7_vx_69477               | [full]   | 1381  | No  | NA    | 1  | 0  | Low-quality    | Genome-fragment | NA | 2.72  | 0     |
| S14_vx_k141_113226        | [full]   | 1637  | No  | NA    | 0  | 2  | Not-determined | Genome-fragment | NA | 0     |       |
| S14_vx_k141_113227        | [full]   | 1621  | No  | NA    | 0  | 2  | Not-determined | Genome-fragment | NA | 0     |       |
| S7_vx_70385               | [full]   | 1381  | No  | NA    | 0  | 0  | Low-quality    | Genome-fragment | NA | 0.76  | 0     |
| S7_vx_87594               | [full]   | 1381  | No  | NA    | 0  | 0  | Low-quality    | Genome-fragment | NA | 0.87  | 0     |
| S14_vx_k141_91308         | [full]   | 1840  | No  | NA    | 0  | 1  | Not-determined | Genome-fragment | NA | 0     |       |
| S14_vx_k141_83976         | [full]   | 1404  | No  | NA    | 0  | 0  | Not-determined | Genome-fragment | NA | 0     |       |
| S14_vx_k141_98150         | [full]   | 1205  | No  | NA    | 0  | 0  | Not-determined | Genome-fragment | NA | 0     |       |
| S14_vx_k141_113258        | [full]   | 2176  | No  | NA    | 0  | 2  | Not-determined | Genome-fragment | NA | 0     |       |
| S7_vx_105919              | [full]   | 1381  | No  | NA    | 0  | 0  | Low-quality    | Genome-fragment | NA | 3.62  | 0     |
| S14_vx_k141_83996         | [full]   | 1589  | No  | NA    | 0  | 1  | Not-determined | Genome-fragment | NA | 0     |       |
| S9_vx_k141_14951          | [full]   | 1382  | No  | NA    | 2  | 0  | Low-quality    | Genome-fragment | NA | 3.11  | 0     |
| S14_vx_k141_69183         | [full]   | 6075  | No  | NA    | 0  | 2  | Not-determined | Genome-fragment | NA | 0     |       |
| S14_vx_k141_69184         | [full]   | 3022  | No  | NA    | 0  | 1  | Not-determined | Genome-fragment | NA | 0     |       |
| S14_vx_k141_98169         | [full]   | 3743  | No  | NA    | 0  | 2  | Not-determined | Genome-fragment | NA | 0     |       |
| S14_extracted_k141_78974  |          | 1382  | No  | NA    | 0  | 2  | Low-quality    | Genome-fragment | NA | 1.02  | 0     |
| S14_vx_k141_13066         | [full]   | 6339  | No  | NA    | 0  | 1  | Not-determined | Genome-fragment | NA | 0     |       |
| S1_extracted_k141_132069  |          | 1382  | No  | NA    | 1  | 0  | Low-quality    | Genome-fragment | NA | 3.48  | 0     |
| S14_vx_k141_106240        | [full]   | 3450  | No  | NA    | 0  | 2  | Not-determined | Genome-fragment | NA | 0     |       |
| S14_vx_k141_46812         | [full]   | 1449  | No  | NA    | 0  | 1  | Not-determined | Genome-fragment | NA | 0     |       |
| S14_vx_k141_106248        | [full]   | 1253  | No  | NA    | 0  | 0  | Not-determined | Genome-fragment | NA | 0     |       |
| S1_vx_k141_42951          | [full]   | 1382  | No  | NA    | 0  | 0  | Low-quality    | Genome-fragment | NA | 3.05  | 0     |
| S14_vx_k141_91404         | [full]   | 1322  | No  | NA    | 0  | 1  | Not-determined | Genome-fragment | NA | 0     |       |
| S14_vx_k141_76874         | [full]   | 2440  | No  | NA    | 0  | 1  | Not-determined | Genome-fragment | NA | 0     |       |
| S14_vx_k141_69262         | [full]   | 1839  | No  | NA    | 0  | 2  | Not-determined | Genome-fragment | NA | 0     |       |
| S3_extracted_k141_84137   |          | 1382  | No  | NA    | 0  | 0  | Low-quality    | Genome-fragment | NA | 0.71  | 0     |
| S2_vx_k141_51279          | [full]   | 1382  | No  | NA    | 0  | 0  | Low-quality    | Genome-fragment | NA | 2.25  | 0     |
| S7_extracted_19795        |          | 1382  | No  | NA    | 1  | 0  | Low-quality    | Genome-fragment | NA | 2.17  | 0     |
| S14_vx_k141_25088         | [full]   | 1510  | No  | NA    | 0  | 1  | Not-determined | Genome-fragment | NA | 0     |       |
| S14_vx_k141_10527         | [full]   | 17551 | No  | NA    | 0  | 3  | Not-determined | Genome-fragment | NA | 0     |       |
| S14_vx_k141_76938         | [full]   | 2518  | No  | NA    | 0  | 1  | Not-determined | Genome-fragment | NA | 0     |       |
| S14_vx_k141_84126         | [full]   | 1471  | No  | NA    | 0  | 0  | Not-determined | Genome-fragment | NA | 0     |       |
| S14_vx_k141_113384        | [full]   | 4977  | No  | NA    | 0  | 0  | Not-determined | Genome-fragment | NA | 0     |       |
| S14_vx_k141_54846         | [full]   | 8729  | No  | NA    | 0  | 0  | Not-determined | Genome-fragment | NA | 0     |       |
| S14_vx_k141_98261         | [full]   | 3306  | No  | NA    | 0  | 2  | Not-determined | Genome-fragment | NA | 0     |       |
| S14_vx_k141_3122          | [full]   | 2469  | No  | NA    | 0  | 3  | Not-determined | Genome-fragment | NA | 0     |       |
| S14_vx_k141_76981         | [full]   | 1449  | No  | NA    | 0  | 1  | Not-determined | Genome-fragment | NA | 2.27  | 0     |
| S14_vx_k141_76994         | [full]   | 1802  | No  | NA    | 0  | 0  | Not-determined | Genome-fragment | NA | 0     |       |
| S14_vx_k141_46941         | [full]   | 2061  | No  | NA    | 0  | 1  | Not-determined | Genome-fragment | NA | 0     |       |
| S7_vx_7281                | [full]   | 1382  | No  | NA    | 1  | 0  | Low-quality    | Genome-fragment | NA | 2.08  | 0     |
| S16_extracted_75195       |          | 1382  | No  | NA    | 0  | 3  | Low-quality    | Genome-fragment | NA | 0.52  | 0     |
| S10_vx_73191              | [full]   | 1382  | No  | NA    | 0  | 1  | Low-quality    | Genome-fragment | NA | 1.83  | 0     |
| S14_vx_k141_10582         | [full]   | 2481  | No  | NA    | 0  | 2  | Not-determined | Genome-fragment | NA | 2.23  | 0     |
| S12_vx_k141_148868        | [H2gene] | 1382  | No  | NA    | 0  | 0  | Low-quality    | Genome-fragment | NA | 3.71  | 0     |
| S17_extracted_k141_13938  |          | 1383  | No  | NA    | 3  | 0  | Low-quality    | Genome-fragment | NA | 3.12  | 0     |
| S9_vx_k141_5696           | [full]   | 1383  | No  | NA    | 0  | 0  | Low-quality    | Genome-fragment | NA | 3.31  | 0     |
| S11_vx_k141_101500        | [full]   | 1383  | No  | NA    | 0  | 0  | Low-quality    | Genome-fragment | NA | 2.96  | 0     |
| S11_vx_k141_24944         | [full]   | 1383  | No  | NA    | 1  | 0  | Low-quality    | Genome-fragment | NA | 0     |       |
| S14_vx_k141_113456        | [full]   | 2705  | No  | NA    | 0  | 1  | Not-determined | Genome-fragment | NA | 1.61  | 0     |
| S13_vx_k1796              | [full]   | 1383  | No  | NA    | 0  | 0  | Low-quality    | Genome-fragment | NA | 0     |       |
| S14_vx_k141_91543         | [full]   | 1765  | No  | NA    | 0  | 3  | Not-determined | Genome-fragment | NA | 0     |       |
| S5_vx_k141_53533          | [full]   | 1383  | No  | NA    | 0  | 0  | Low-quality    | Genome-fragment | NA | 3.13  | 0     |
| S7_vx_12553               | [full]   | 1383  | No  | NA    | 0  | 0  | Low-quality    | Genome-fragment | NA | 2.24  | 0     |
| S7_vx_46650               | [full]   | 1383  | No  | NA    | 0  | 2  | Low-quality    | Genome-fragment | NA | 1.68  | 0     |
| S14_vx_k141_3209          | [full]   | 1530  | No  | NA    | 0  | 1  | Not-determined | Genome-fragment | NA | 0     |       |
| S14_vx_k141_25213         | [full]   | 2637  | No  | NA    | 0  | 0  | Not-determined | Genome-fragment | NA | 2.53  | 0     |
| S7_vx_60900               | [full]   | 1383  | No  | NA    | 0  | 0  | Low-quality    | Genome-fragment | NA | 0     |       |
| S14_vx_k141_32748         | [full]   | 1064  | No  | NA    | 0  | 0  | Not-determined | Genome-fragment | NA | 0     |       |
| S14_vx_k141_47026         | [full]   | 1189  | No  | NA    | 0  | 1  | Not-determined | Genome-fragment | NA | 0.85  | 0     |
| S10_extracted_92123       |          | 1383  | No  | NA    | 0  | 0  | Low-quality    | Genome-fragment | NA | 0     |       |
| S14_vx_k141_25239         | [full]   | 1687  | No  | NA    | 0  | 2  | Not-determined | Genome-fragment | NA | 0     |       |
| S10_vx_5252               | [full]   | 1383  | No  | NA    | 1  | 0  | Low-quality    | Genome-fragment | NA | 2.26  | 0     |
| S6_vx_k141_7338           | [full]   | 1383  | No  | NA    | 1  | 0  | Low-quality    | Genome-fragment | NA | 3.59  | 0     |
| S6_vx_k141_5051           | [full]   | 1383  | No  | NA    | 0  | 0  | Low-quality    | Genome-fragment | NA | 2.41  | 0     |
| S8_vx_k141_206885         | [full]   | 1383  | No  | NA    | 0  | 1  | Low-quality    | Genome-fragment | NA | 0.8   | 0     |
| S14_vx_k141_84289         | [full]   | 2031  | No  | NA    | 0  | 0  | Not-determined | Genome-fragment | NA | 0     |       |
| S14_vx_k141_18333         | [full]   | 1463  | No  | NA    | 0  | 1  | Not-determined | Genome-fragment | NA | 0     |       |
| S17_vx_k141_37189         | [full]   | 1384  | No  | NA    | 0  | 0  | Low-quality    | Genome-fragment | NA | 0     |       |
| S14_vx_k141_32799         | [full]   | 5606  | No  | NA    | 0  | 4  | Not-determined | Genome-fragment | NA | 0     |       |
| S14_vx_k141_25269         | [full]   | 4579  | No  | NA    | 0  | 4  | Not-determined | Genome-fragment | NA | 0     |       |
| S14_vx_k141_54951         | [full]   | 1405  | No  | NA    | 0  | 0  | Not-determined | Genome-fragment | NA | 0     |       |
| S9_vx_k141_71291          | [full]   | 1384  | No  | NA    | 1  | 0  | Low-quality    | Genome-fragment | NA | 2.92  | 0     |
| S14_vx_k141_10693         | [full]   | 1811  | No  | NA    | 0  | 1  | Not-determined | Genome-fragment | NA | 1.16  | 0     |
| S11_extracted_k141_29156  |          | 1384  | No  | NA    | 0  | 0  | Low-quality    | Genome-fragment | NA | 0     |       |
| S14_vx_k141_10729         | [full]   | 7461  | No  | NA    | 0  | 8  | Not-determined | Genome-fragment | NA | 1.74  | 0     |
| S13_vx_36916              | [full]   | 1384  | No  | NA    | 0  | 0  | Low-quality    | Genome-fragment | NA | 0     |       |
| S14_vx_k141_40471         | [full]   | 1940  | No  | NA    | 0  | 2  | Not-determined | Genome-fragment | NA | 2.66  | 0     |
| S13_vx_70694              | [full]   | 1384  | No  | NA    | 1  | 0  | Low-quality    | Genome-fragment | NA | 0.96  | 0     |
| S3_extracted_k141_28889   |          | 1384  | No  | NA    | 0  | 2  | Low-quality    | Genome-fragment | NA | 0     |       |
| S14_vx_k141_106466        | [full]   | 4349  | No  | NA    | 0  | 2  | Not-determined | Genome-fragment | NA | 0     |       |
| S14_vx_k141_113588        | [full]   | 1728  | No  | NA    | 0  | 0  | Not-determined | Genome-fragment | NA | 0     |       |
| S14_vx_k141_69519         | [full]   | 2019  | No  | NA    | 0  | 3  | Not-determined | Genome-fragment | NA | 0     |       |
| S3_vx_k141_68959          | [full]   | 1384  | No  | NA    | 0  | 1  | Low-quality    | Genome-fragment | NA | 2.11  | 0     |
| S5_vx_k141_89702          | [full]   | 1384  | No  | NA    | 0  | 0  | Low-quality    | Genome-fragment | NA | 0.87  | 0     |
| S5_vx_k141_129266         | [full]   | 1384  | No  | NA    | 1  | 0  | Low-quality    | Genome-fragment | NA | 4.25  | 0     |
| S14_vx_k141_98500         | [full]   | 5742  | No  | NA    | 0  | 1  | Not-determined | Genome-fragment | NA | 0     |       |
| S14_vx_k141_84332         | [full]   | 5215  | No  | NA    | 0  | 0  | Not-determined | Genome-fragment | NA | 0     |       |
| S7_extracted_137936       |          | 1384  | No  | NA    | 2  | 0  | Low-quality    | Genome-fragment | NA | 2.86  | 0     |
| S16_vx_172299             | [full]   | 1384  | No  | NA    | 0  | 0  | Low-quality    | Genome-fragment | NA | 3.53  | 0     |
| S10_vx_27395              | [full]   | 1384  | No  | NA    | 0  | 0  | Low-quality    | Genome-fragment | NA | 2.55  | 0     |
| S12_vx_k141_66690         | [full]   | 1384  | No  | NA    | 0  | 1  | Low-quality    | Genome-fragment | NA | 0.33  | 0     |
| S12_vx_k141_171019        | [full]   | 1384  | No  | NA    | 1  | 0  | Low-quality    | Genome-fragment | NA | 3.04  | 0     |
| S2_vx_k141_1248           | [full]   | 1384  | No  | NA    | 0  | 0  | Low-quality    | Genome-fragment | NA | 2.39  | 0     |
| S6_vx_k141_4356           | [full]   | 1384  | No  | NA    | 0  | 2  | Low-quality    | Genome-fragment | NA | 0.41  | 0     |
| S17_extracted_k141_98763  |          | 1385  | No  | NA    | 0  | 1  | Low-quality    | Genome-fragment | NA | 0.75  | 0     |
| S13_vx_146182             | [full]   | 1385  | No  | NA    | 0  | 4  | Low-quality    | Genome-fragment | NA | 0.41  | 0     |
| S14_vx_k141_47250         | [full]   | 6014  | No  | NA    | 0  | 4  | Not-determined | Genome-fragment | NA | 0.68  | 0     |
| S7_extracted_73242        |          | 1385  | No  | NA    | 0  | 1  | Low-quality    | Genome-fragment | NA | 0     |       |
| S14_vx_k141_98559         | [full]   | 2459  | No  | NA    | 0  | 2  | Not-determined | Genome-fragment | NA | 3.87  | 0     |
| S8_vx_k141_61696          | [full]   | 1385  | No  | NA    | 0  | 0  | Low-quality    | Genome-fragment | NA | 0     |       |
| S14_vx_k141_18451         | [full]   | 2063  | No  | NA    | 0  | 0  | Not-determined | Genome-fragment | NA | 2.53  | 0     |
| S8_vx_k141_111418         | [full]   | 1385  | No  | NA    | 2  | 0  | Low-quality    | Genome-fragment | NA | 2.43  | 0     |
| S17_vx_k141_35792         | [H2gene] | 1386  | No  | NA    | 0  | 0  | Low-quality    | Genome-fragment | NA | 2.87  | 0     |
| S9_vx_k141_10841          | [full]   | 1386  | No  | NA    | 0  |    |                |                 |    |       |       |



|                           |          |        |     |     |    |                |                |                 |       |       |       |
|---------------------------|----------|--------|-----|-----|----|----------------|----------------|-----------------|-------|-------|-------|
| S14_vx_k141_40812         | [full]   | 2053   | No  | NA  | 0  | 2              | Not-determined | Genome-fragment | NA    | 0     | 0     |
| S14_vx_k141_18636         | [full]   | 1562   | No  | NA  | 1  | 1              | Not-determined | Genome-fragment | NA    | 0     | 0     |
| S5_vx_k141_116036         | [full]   | 1388   | No  | NA  | 0  | 0              | Low-quality    | Genome-fragment | NA    | 4.03  | 0     |
| S14_vx_k141_106697        | [full]   | 1636   | No  | NA  | 0  | 0              | Not-determined | Genome-fragment | NA    | 0     | 0     |
| S5_vx_k141_117133         | [full]   | 1388   | No  | NA  | 2  | 0              | Low-quality    | Genome-fragment | NA    | 4.16  | 0     |
| S16_extracted_103824      | [full]   | 1388   | No  | NA  | 0  | 0              | Low-quality    | Genome-fragment | NA    | 3.83  | 0     |
| S14_vx_k141_106711        | [full]   | 1255   | No  | NA  | 0  | 0              | Not-determined | Genome-fragment | NA    | 0     | 0     |
| S14_vx_k141_69847         | [full]   | 1356   | No  | NA  | 0  | 3              | Not-determined | Genome-fragment | NA    | 0     | 0     |
| S16_vx_125892             | [full]   | 1388   | No  | NA  | 0  | 0              | Low-quality    | Genome-fragment | NA    | 0.91  | 0     |
| S16_vx_130550             | [full]   | 1388   | No  | NA  | 2  | 0              | Low-quality    | Genome-fragment | NA    | 3.95  | 0     |
| S10_extracted_36677       | [full]   | 1388   | No  | NA  | 1  | 0              | Low-quality    | Genome-fragment | NA    | 1.23  | 0     |
| S14_vx_k141_69864         | [full]   | 2237   | No  | NA  | 3  | 1              | Not-determined | Genome-fragment | NA    | 0     | 0     |
| S2_vx_k141_20480          | [full]   | 1388   | No  | NA  | 0  | 2              | Low-quality    | Genome-fragment | NA    | 2.32  | 0     |
| S14_vx_k141_77148         | [full]   | 2324   | No  | NA  | 0  | 3              | Not-determined | Genome-fragment | NA    | 0     | 0     |
| S14_vx_k141_62178         | [full]   | 32459  | No  | NA  | 20 | 2              | High-quality   | High-quality    | 96.78 | 0     | 0     |
| S8_extracted_k141_31199   | [full]   | 1388   | No  | NA  | 0  | 0              | Not-determined | Genome-fragment | NA    | 0.75  | 0     |
| S14_vx_k141_69870         | [full]   | 3892   | No  | NA  | 0  | 3              | Not-determined | Genome-fragment | NA    | 0     | 0     |
| S9_vx_k141_44698          | [full]   | 1389   | No  | NA  | 0  | 0              | Low-quality    | Genome-fragment | NA    | 3.35  | 0     |
| S14_vx_k141_47488         | [full]   | 1058   | No  | NA  | 0  | 0              | Not-determined | Genome-fragment | NA    | 0     | 0     |
| S14_vx_k141_33133         | [full]   | 1087   | No  | NA  | 0  | 1              | Not-determined | Genome-fragment | NA    | 0     | 0     |
| S14_vx_k141_40918         | [full]   | 1059   | No  | NA  | 0  | 0              | Not-determined | Genome-fragment | NA    | 0     | 0     |
| S14_extracted_k141_95333  | [full]   | 1389   | No  | NA  | 0  | 0              | Low-quality    | Genome-fragment | NA    | 2.37  | 0     |
| S14_vx_k141_30990         | [full]   | 1389   | No  | NA  | 1  | 0              | Low-quality    | Genome-fragment | NA    | 3.12  | 0     |
| S14_vx_k141_84654         | [full]   | 7602   | No  | NA  | 0  | 2              | Not-determined | Genome-fragment | NA    | 0     | 0     |
| S3_vx_k141_88962          | [full]   | 1389   | No  | NA  | 1  | 0              | Low-quality    | Genome-fragment | NA    | 3.03  | 0     |
| S3_vx_k141_127030         | [full]   | 1389   | No  | NA  | 0  | 0              | Low-quality    | Genome-fragment | NA    | 1.14  | 0     |
| S5_vx_k141_91956          | [full]   | 1389   | No  | NA  | 0  | 0              | Low-quality    | Genome-fragment | NA    | 1.48  | 0     |
| S14_vx_k141_55267         | [full]   | 10555  | No  | NA  | 0  | 6              | Not-determined | Genome-fragment | NA    | 0     | 0     |
| S5_vx_k141_90662          | [full]   | 1389   | No  | NA  | 0  | 0              | Low-quality    | Genome-fragment | NA    | 1.33  | 0     |
| S14_vx_k141_18734         | [full]   | 1782   | No  | NA  | 0  | 0              | Not-determined | Genome-fragment | NA    | 0     | 0     |
| S14_vx_k141_3620          | [full]   | 2231   | No  | NA  | 0  | 1              | Not-determined | Genome-fragment | NA    | 0     | 0     |
| S16_vx_14716              | [full]   | 1389   | No  | NA  | 0  | 0              | Low-quality    | Genome-fragment | NA    | 3.24  | 0     |
| S16_vx_76194              | [full]   | 1389   | No  | NA  | 0  | 0              | Low-quality    | Genome-fragment | NA    | 2.33  | 0     |
| S14_vx_k141_113984        | [full]   | 2105   | No  | NA  | 0  | 2              | Not-determined | Genome-fragment | NA    | 0     | 0     |
| S8_extracted_k141_201328  | [full]   | 1389   | No  | NA  | 0  | 2              | Low-quality    | Genome-fragment | NA    | 0.32  | 0     |
| S17_vx_k141_146532        | [full]   | 1390   | No  | NA  | 0  | 0              | Low-quality    | Genome-fragment | NA    | 1.39  | 0     |
| S14_vx_k141_77304         | [full]   | 2322   | No  | NA  | 0  | 1              | Not-determined | Genome-fragment | NA    | 0     | 0     |
| S14_vx_k141_114022        | [full]   | 1080   | No  | NA  | 0  | 1              | Not-determined | Genome-fragment | NA    | 0     | 0     |
| S17_vx_k141_24527         | [full]   | 1390   | No  | NA  | 0  | 0              | Low-quality    | Genome-fragment | NA    | 3.53  | 0     |
| S14_vx_k141_92076         | [full]   | 1165   | No  | NA  | 0  | 0              | Not-determined | Genome-fragment | NA    | 0     | 0     |
| S14_vx_k141_98909         | [full]   | 1749   | No  | NA  | 0  | 2              | Not-determined | Genome-fragment | NA    | 0     | 0     |
| S9_vx_k141_64690          | [full]   | 1390   | No  | NA  | 0  | 0              | Low-quality    | Genome-fragment | NA    | 3.53  | 0     |
| S7_extracted_74414        | [full]   | 1390   | No  | NA  | 2  | 0              | Low-quality    | Genome-fragment | NA    | 4.88  | 0     |
| S14_vx_k141_18845         | [full]   | 2772   | No  | NA  | 0  | 3              | Not-determined | Genome-fragment | NA    | 0     | 0     |
| S7_vx_25008               | [full]   | 1390   | No  | NA  | 0  | 0              | Low-quality    | Genome-fragment | NA    | 2.63  | 0     |
| S10_vx_k141               | [full]   | 1390   | No  | NA  | 0  | 0              | Low-quality    | Genome-fragment | NA    | 2.56  | 0     |
| S12_extracted_k141_156391 | [full]   | 1390   | No  | NA  | 0  | 1              | Low-quality    | Genome-fragment | NA    | 0.4   | 0     |
| S14_vx_k141_25741         | [full]   | 1456   | No  | NA  | 0  | 0              | Not-determined | Genome-fragment | NA    | 0     | 0     |
| S12_vx_k141_100679        | [full]   | 1390   | No  | NA  | 0  | 0              | Low-quality    | Genome-fragment | NA    | 3.18  | 0     |
| S14_vx_k141_33280         | [full]   | 1445   | No  | NA  | 0  | 0              | Not-determined | Genome-fragment | NA    | 0     | 0     |
| S4_extracted_7057         | [full]   | 1390   | No  | NA  | 0  | 1              | Low-quality    | Genome-fragment | NA    | 1.18  | 0     |
| S14_vx_k141_55376         | [full]   | 2101   | No  | NA  | 0  | 1              | Not-determined | Genome-fragment | NA    | 0     | 0     |
| S14_vx_k141_18962         | [full]   | 1969   | No  | NA  | 0  | 1              | Not-determined | Genome-fragment | NA    | 0     | 0     |
| S14_vx_k141_89965         | [full]   | 3251   | No  | NA  | 0  | 0              | Not-determined | Genome-fragment | NA    | 0     | 0     |
| S14_vx_k141_55407         | [full]   | 6005   | No  | NA  | 0  | 1              | Not-determined | Genome-fragment | NA    | 0     | 0     |
| S8_vx_k141_32386          | [full]   | 1390   | No  | NA  | 0  | 0              | Low-quality    | Genome-fragment | NA    | 2.57  | 0     |
| S14_vx_k141_92222         | [full]   | 2602   | No  | NA  | 0  | 2              | Not-determined | Genome-fragment | NA    | 0     | 0     |
| S17_extracted_k141_91998  | [full]   | 1391   | No  | NA  | 0  | 0              | Low-quality    | Genome-fragment | NA    | 0.97  | 0     |
| S14_vx_k141_100971        | [full]   | 1819   | No  | NA  | 0  | 0              | Not-determined | Genome-fragment | NA    | 0     | 0     |
| S14_vx_k141_99003         | [full]   | 6352   | No  | NA  | 0  | 3              | Not-determined | Genome-fragment | NA    | 0     | 0     |
| S17_extracted_k141_85169  | [full]   | 1391   | No  | NA  | 0  | 1              | Low-quality    | Genome-fragment | NA    | 1.33  | 0     |
| S14_vx_k141_99022         | [full]   | 3870   | No  | NA  | 0  | 0              | Not-determined | Genome-fragment | NA    | 0     | 0     |
| S17_vx_k141_49192         | [H2gene] | 1391   | No  | NA  | 2  | 0              | Low-quality    | Genome-fragment | NA    | 3.24  | 0     |
| S11_vx_k141_32019         | [full]   | 1391   | No  | NA  | 0  | 0              | Low-quality    | Genome-fragment | NA    | 3     | 0     |
| S14_vx_k141_69959         | [full]   | 1314   | No  | NA  | 0  | 2              | Not-determined | Genome-fragment | NA    | 0     | 0     |
| S13_vx_k141_42233         | [full]   | 1391   | No  | NA  | 0  | 0              | Low-quality    | Genome-fragment | NA    | 2.16  | 0     |
| S14_vx_k141_55498         | [full]   | 5183   | No  | NA  | 0  | 3              | Not-determined | Genome-fragment | NA    | 0     | 0     |
| S14_vx_k141_99040         | [full]   | 2478   | No  | NA  | 0  | 0              | Not-determined | Genome-fragment | NA    | 0     | 0     |
| S14_vx_k141_55502         | [full]   | 2524   | No  | NA  | 0  | 2              | Not-determined | Genome-fragment | NA    | 0     | 0     |
| S14_vx_k141_55503         | [full]   | 1302   | No  | NA  | 0  | 2              | Not-determined | Genome-fragment | NA    | 0     | 0     |
| S14_vx_k141_42462         | [full]   | 1391   | No  | NA  | 1  | 0              | Low-quality    | Genome-fragment | NA    | 3.12  | 0     |
| S14_vx_k141_59523         | [H2gene] | 1391   | No  | NA  | 0  | 0              | Low-quality    | Genome-fragment | NA    | 2.63  | 0     |
| S14_vx_k141_99048         | [full]   | 3089   | No  | NA  | 0  | 2              | Not-determined | Genome-fragment | NA    | 0     | 0     |
| S14_vx_k141_54815         | [H2gene] | 1391   | No  | NA  | 1  | 0              | Low-quality    | Genome-fragment | NA    | 3.31  | 0     |
| S3_vx_k141_81564          | [full]   | 1391   | No  | NA  | 2  | 0              | Low-quality    | Genome-fragment | NA    | 3.88  | 0     |
| S5_vx_k141_61841          | [full]   | 1391   | Yes | 667 | 1  | 1              | Low-quality    | Genome-fragment | NA    | 1.16  | 52.05 |
| S5_vx_k141_106711         | [full]   | 1391   | No  | NA  | 0  | 0              | Low-quality    | Genome-fragment | NA    | 1.15  | 0     |
| S7_vx_85762               | [full]   | 1391   | No  | NA  | 0  | 0              | Low-quality    | Genome-fragment | NA    | 3.01  | 0     |
| S14_vx_k141_41278         | [full]   | 5267   | No  | NA  | 0  | 2              | Not-determined | Genome-fragment | NA    | 0     | 0     |
| S10_vx_k141_41304         | [full]   | 1391   | No  | NA  | 0  | 0              | Low-quality    | Genome-fragment | NA    | 2.7   | 0     |
| S14_vx_k141_3973          | [full]   | 3779   | No  | NA  | 0  | 3              | Not-determined | Genome-fragment | NA    | 0     | 0     |
| S14_vx_k141_70031         | [full]   | 1742   | No  | NA  | 0  | 0              | Not-determined | Genome-fragment | NA    | 0     | 0     |
| S10_vx_39275              | [H2gene] | 1391   | No  | NA  | 0  | 0              | Low-quality    | Genome-fragment | NA    | 1.9   | 0     |
| S14_vx_k141_19163         | [full]   | 2168   | No  | NA  | 0  | 1              | Not-determined | Genome-fragment | NA    | 2.8   | 0     |
| S8_extracted_k141_161109  | [full]   | 1391   | No  | NA  | 0  | 0              | Low-quality    | Genome-fragment | NA    | 0     | 0     |
| S14_vx_k141_85005         | [full]   | 13517  | No  | NA  | 0  | 4              | Not-determined | Genome-fragment | NA    | 0     | 0     |
| S14_vx_k141_19175         | [full]   | 2075   | No  | NA  | 0  | 1              | Not-determined | Genome-fragment | NA    | 0     | 0     |
| S8_vx_k141_164079         | [full]   | 1391   | No  | NA  | 0  | 0              | Low-quality    | Genome-fragment | NA    | 3.32  | 0     |
| S14_vx_k141_25851         | [full]   | 107963 | No  | NA  | 29 | Medium-quality | Medium-quality | Medium-quality  | 66.62 | 0     | 0     |
| S13_extracted_136965      | [full]   | 1392   | No  | NA  | 2  | 0              | Low-quality    | Genome-fragment | NA    | 3.46  | 0     |
| S14_vx_k141_36772         | [full]   | 1392   | No  | NA  | 0  | 0              | Low-quality    | Genome-fragment | NA    | 3.39  | 0     |
| S14_vx_k141_57906         | [full]   | 1392   | No  | NA  | 0  | 0              | Low-quality    | Genome-fragment | NA    | 3.47  | 0     |
| S14_vx_k141_92342         | [full]   | 2953   | No  | NA  | 0  | 0              | Not-determined | Genome-fragment | NA    | 0     | 0     |
| S1_vx_k141_5812           | [full]   | 1392   | No  | NA  | 1  | 0              | Low-quality    | Genome-fragment | NA    | 29.78 | 0     |
| S14_vx_k141_25877         | [full]   | 2507   | No  | NA  | 0  | 0              | Not-determined | Genome-fragment | NA    | 0     | 0     |
| S14_vx_k141_19223         | [full]   | 1561   | No  | NA  | 0  | 0              | Not-determined | Genome-fragment | NA    | 0     | 0     |
| S1_vx_k141_34393          | [H2gene] | 1392   | No  | NA  | 1  | 0              | Low-quality    | Genome-fragment | NA    | 3.88  | 0     |
| S14_vx_k141_11510         | [full]   | 60098  | No  | NA  | 1  | 19             | Medium-quality | Genome-fragment | NA    | 58.68 | 0     |
| S3_extracted_k141_79286   | [full]   | 1392   | No  | NA  | 0  | 0              | Low-quality    | Genome-fragment | NA    | 1.47  | 0     |
| S14_vx_k141_4037          | [full]   | 4235   | No  | NA  | 0  | 1              | Not-determined | Genome-fragment | NA    | 0     | 0     |
| S14_vx_k141_11522         | [full]   | 1867   | No  | NA  | 0  | 0              | Not-determined | Genome-fragment | NA    | 0     | 0     |
| S14_vx_k141_85078         | [full]   | 2209   | No  | NA  | 0  | 2              | Not-determined | Genome-fragment | NA    | 0     | 0     |
| S5_extracted_k141_87538   | [full]   | 1392   | No  | NA  | 3  | 0              | Low-quality    | Genome-fragment | NA    | 4.13  | 0     |
| S5_extracted_k141_130972  | [full]   | 1392   | No  | NA  | 1  | 0              | Low-quality    | Genome-fragment | NA    | 3.82  | 0     |
| S14_vx_k141_33541         | [full]   | 5493   | No  | NA  | 0  | 4              | Not-determined | Genome-fragment | NA    | 0     | 0     |
| S7_vx_84737               | [H2gene] | 1392   | No  | NA  | 1  | 0              | Low-quality    | Genome-fragment | NA    | 3.16  | 0     |
| S14_vx_k141_4097          | [full]   | 1472   | No  | NA  | 0  | 1              | Not-determined | Genome-fragment | NA    | 0     | 0     |
| S10_vx_91960              | [full]   | 1392   | No  | NA  | 1  | 0              | Low-quality    | Genome-fragment | NA    | 3.73  | 0     |
| S14_vx_k141_62577         | [full]   | 1294   | No  | NA  | 0  | 0              | Not-determined | Genome-fragment | NA    | 0     | 0     |
| S14_vx_k141_19329         | [full]   | 5498   | No  | NA  | 0  | 1              | Not-determined | Genome-fragment | NA    | 0     | 0     |
| S8_extracted_k141_86084   | [full]   | 1392   | No  | NA  | 0  | 1              | Low-quality    | Genome-fragment | NA    | 1.1   | 0     |
| S14_vx_k141_43541         | [full]   | 2674   | No  | NA  | 0  | 0              | Not-determined | Genome-fragment | NA    | 0     | 0     |
| S9_vx_k141_55411          | [H2gene] | 1393   | No  | NA  | 1  | 0              | Low-quality    | Genome-fragment | NA    | 2.24  | 0     |
| S14_vx_k141_25933         | [full]   | 5352   | No  | NA  | 0  | 2              | Not-determined | Genome-fragment | NA    | 0     | 0     |
| S14_vx_k141_98819         | [full]   | 1393   | No  | NA  | 0  | 1              | Low-quality    | Genome-fragment | NA    | 1.89  | 0     |
| S14_vx_k141_92465         | [full]   | 1666   | No  | NA  | 0  | 0              | Not-determined | Genome-fragment | NA    | 0     | 0     |
| S5_extracted_k141_120953  | [full]   | 1393   | No  | NA  | 1  | 0              | Low-quality    | Genome-fragment | NA    | 0.41  | 0     |
| S7_extracted_71777        | [full]   | 1393   | No  | NA  | 0  | 1              | Low-quality    | Genome-fragment | NA    | 0.38  | 0     |
| S7_vx_47193               | [H2gene] | 1393   | No  | NA  | 0  | 0              | Low-quality    | Genome-fragment | NA    | 4.5   | 0     |
| S16_extracted_107656      | [full]   | 1393   | No  | NA  | 0  | 0              | Low-quality    | Genome-fragment | NA    | 1.17  | 0     |
| S14_vx_k141_41420         | [full]   | 1560   | No  | NA  | 0  | 0              | Not-determined | Genome-fragment | NA    | 0     | 0     |
| S14_vx_k141_14442         | [full]   | 3118   | No  | NA  | 0  | 1              | Not-determined | Genome-fragment | NA    | 0     | 0     |
| S14_vx_k141_41422         | [full]   | 5436   | No  | NA  | 0  | 4              | Not-determined | Genome-fragment | NA    | 0     | 0     |
| S16_vx_24186              | [full]   | 1393   | No  | NA  | 1  | 0              | Low-quality    | Genome-fragment | NA    | 3.16  | 0     |
| S14_vx_k141_19445         | [full]   | 1624   | No  | NA  | 0  | 2              | Not-determined | Genome-fragment | NA    | 0     | 0     |
| S14_vx_k141_41437         | [full]   | 3743   | No  | NA  | 0  | 3              | Not-determined | Genome-fragment | NA    | 0     | 0     |
| S10_vx_51363              | [full]   | 1393   | No  | NA  | 1  | 0              | Low-quality    | Genome-fragment |       |       |       |



|                           |        |     |       |    |    |                |                 |       |       |
|---------------------------|--------|-----|-------|----|----|----------------|-----------------|-------|-------|
| S16_extracted_154831      | 1396   | No  | NA    | 0  | 2  | Low-quality    | Genome-fragment | 3.94  | 0     |
| S14_vx_k141_33719         | 2099   | No  | NA    | 1  | 1  | Not-determined | Genome-fragment | NA    | 0     |
| S10_vx_k101297            | 1396   | No  | NA    | 2  | 0  | Low-quality    | Genome-fragment | 2.4   | 0     |
| S14_vx_k141_26380         | 1397   | No  | NA    | 0  | 0  | Low-quality    | Genome-fragment | 4.05  | 0     |
| S14_vx_k141_107472        | 4976   | No  | NA    | 0  | 4  | Not-determined | Genome-fragment | NA    | 0     |
| S14_vx_k141_85373         | 1468   | No  | NA    | 0  | 0  | Not-determined | Genome-fragment | NA    | 0     |
| S14_vx_k141_92797         | 1356   | No  | NA    | 0  | 0  | Not-determined | Genome-fragment | NA    | 0     |
| S1_vx_k141_155456         | 1397   | No  | NA    | 1  | 0  | Low-quality    | Genome-fragment | 3.06  | 0     |
| S3_extracted_k141_91243   | 1397   | No  | NA    | 0  | 0  | Low-quality    | Genome-fragment | 2.29  | 0     |
| S5_extracted_k141_114417  | 1397   | No  | NA    | 0  | 0  | Low-quality    | Genome-fragment | 3.38  | 0     |
| S14_vx_k141_92821         | 12277  | No  | NA    | 0  | 2  | Not-determined | Genome-fragment | NA    | 0     |
| S14_vx_k141_26180         | 3982   | No  | NA    | 0  | 2  | Not-determined | Genome-fragment | NA    | 0     |
| S7_extracted_137347       | 1397   | No  | NA    | 1  | 0  | Low-quality    | Genome-fragment | 2.43  | 0     |
| S14_vx_k141_70579         | 1289   | No  | NA    | 0  | 0  | Not-determined | Genome-fragment | NA    | 0     |
| S16_vx_74040              | 1397   | No  | NA    | 2  | 0  | Low-quality    | Genome-fragment | 2.99  | 0     |
| S14_vx_k141_78078         | 5167   | No  | NA    | 0  | 3  | Not-determined | Genome-fragment | NA    | 0     |
| S12_vx_k141_63513         | 1397   | No  | NA    | 0  | 0  | Low-quality    | Genome-fragment | 2.45  | 0     |
| S4_extracted_25293        | 1397   | No  | NA    | 0  | 2  | Low-quality    | Genome-fragment | 0.78  | 0     |
| S14_vx_k141_26208         | 2870   | No  | NA    | 0  | 2  | Not-determined | Genome-fragment | NA    | 0     |
| S8_vx_k141_888            | 1397   | No  | NA    | 0  | 1  | Low-quality    | Genome-fragment | 3.23  | 0     |
| S14_vx_k141_19724         | 1917   | No  | NA    | 0  | 1  | Not-determined | Genome-fragment | NA    | 0     |
| S17_vx_k141_96326         | 1398   | No  | NA    | 0  | 0  | Low-quality    | Genome-fragment | 2.11  | 0     |
| S14_extracted_k141_79927  | 1398   | No  | NA    | 1  | 0  | Low-quality    | Genome-fragment | 2.13  | 0     |
| S1_vx_k141_120906         | 1398   | No  | NA    | 1  | 0  | Low-quality    | Genome-fragment | 3.97  | 0     |
| S14_vx_k141_85424         | 1455   | No  | NA    | 0  | 0  | Not-determined | Genome-fragment | NA    | 0     |
| S1_vx_k141_110631         | 1398   | No  | NA    | 0  | 0  | Low-quality    | Genome-fragment | 3.46  | 0     |
| S14_vx_k141_107540        | 1834   | No  | NA    | 0  | 0  | Not-determined | Genome-fragment | NA    | 0     |
| S14_vx_k141_41743         | 1184   | No  | NA    | 0  | 1  | Not-determined | Genome-fragment | NA    | 0     |
| S1_vx_k141_2797           | 1398   | No  | NA    | 0  | 0  | Low-quality    | Genome-fragment | 2.96  | 0     |
| S14_vx_k141_107544        | 5718   | No  | NA    | 0  | 4  | Not-determined | Genome-fragment | NA    | 0     |
| S3_extracted_k141_115575  | 1398   | No  | NA    | 2  | 0  | Low-quality    | Genome-fragment | 4.61  | 0     |
| S3_vx_k141_35725          | 1398   | No  | NA    | 0  | 0  | Low-quality    | Genome-fragment | 0.46  | 0     |
| S14_vx_k141_19787         | 1806   | No  | NA    | 0  | 0  | Not-determined | Genome-fragment | NA    | 0     |
| S14_vx_k141_26283         | 2362   | No  | NA    | 0  | 2  | Not-determined | Genome-fragment | NA    | 0     |
| S14_vx_k141_107564        | 2340   | No  | NA    | 0  | 2  | Not-determined | Genome-fragment | NA    | 0     |
| S7_vx_32674               | 1398   | No  | NA    | 0  | 0  | Low-quality    | Genome-fragment | 3.8   | 0     |
| S16_extracted_123900      | 1398   | No  | NA    | 0  | 1  | Low-quality    | Genome-fragment | 2.64  | 0     |
| S14_vx_k141_107573        | 1168   | No  | NA    | 0  | 0  | Not-determined | Genome-fragment | NA    | 0     |
| S6_vx_k141_11680          | 1398   | No  | NA    | 0  | 2  | Low-quality    | Genome-fragment | 0.44  | 0     |
| S8_vx_k141_97942          | 1398   | No  | NA    | 1  | 0  | Low-quality    | Genome-fragment | 3.27  | 0     |
| S17_extracted_k141_98213  | 1399   | No  | NA    | 1  | 0  | Low-quality    | Genome-fragment | 2.34  | 0     |
| S17_extracted_k141_110641 | 1399   | No  | NA    | 0  | 0  | Not-determined | Genome-fragment | 3.52  | 0     |
| S14_vx_k141_107611        | 1403   | No  | NA    | 0  | 1  | Not-determined | Genome-fragment | NA    | 0     |
| S14_vx_k141_41831         | 1573   | No  | NA    | 0  | 2  | Not-determined | Genome-fragment | NA    | 0     |
| S9_vx_k141_33491          | 1399   | No  | NA    | 0  | 1  | Low-quality    | Genome-fragment | 3.32  | 0     |
| S14_vx_k141_85509         | 1445   | No  | NA    | 0  | 0  | Not-determined | Genome-fragment | NA    | 0     |
| S11_extracted_k141_19923  | 1399   | No  | NA    | 0  | 0  | Low-quality    | Genome-fragment | 4.09  | 0     |
| S14_vx_k141_112796        | 1399   | No  | NA    | 1  | 0  | Low-quality    | Genome-fragment | 2.57  | 0     |
| S14_vx_k141_70801         | 2510   | No  | NA    | 0  | 2  | Not-determined | Genome-fragment | NA    | 0     |
| S1_extracted_k141_54785   | 1399   | No  | NA    | 1  | 0  | Low-quality    | Genome-fragment | 3.84  | 0     |
| S14_vx_k141_107669        | 4451   | No  | NA    | 0  | 4  | Not-determined | Genome-fragment | NA    | 0     |
| S14_vx_k141_70810         | 2275   | No  | NA    | 0  | 1  | Not-determined | Genome-fragment | NA    | 0     |
| S14_vx_k141_41869         | 1392   | No  | NA    | 0  | 0  | Not-determined | Genome-fragment | NA    | 0     |
| S14_vx_k141_114886        | 12310  | No  | NA    | 0  | 0  | Not-determined | Genome-fragment | NA    | 0     |
| S3_extracted_k141_79394   | 1399   | No  | NA    | 0  | 0  | Low-quality    | Genome-fragment | 2.31  | 0     |
| S14_vx_k141_78159         | 1525   | No  | NA    | 0  | 0  | Not-determined | Genome-fragment | NA    | 0     |
| S5_vx_k141_25872          | 1399   | No  | NA    | 0  | 1  | Low-quality    | Genome-fragment | 1.91  | 0     |
| S14_vx_k141_85558         | 2362   | No  | NA    | 0  | 2  | Not-determined | Genome-fragment | NA    | 0     |
| S14_vx_k141_34001         | 3147   | No  | NA    | 0  | 2  | Not-determined | Genome-fragment | NA    | 0     |
| S14_vx_k141_41888         | 1174   | No  | NA    | 0  | 1  | Not-determined | Genome-fragment | NA    | 0     |
| S14_vx_k141_4604          | 1300   | No  | NA    | 0  | 1  | Not-determined | Genome-fragment | NA    | 0     |
| S14_vx_k141_4607          | 3109   | No  | NA    | 0  | 3  | Not-determined | Genome-fragment | NA    | 0     |
| S14_vx_k141_85617         | 6246   | No  | NA    | 0  | 0  | Not-determined | Genome-fragment | NA    | 0     |
| S5_vx_k141_15035          | 1399   | No  | NA    | 1  | 0  | Low-quality    | Genome-fragment | 3.67  | 0     |
| S14_vx_k141_78144         | 38093  | Yes | 33442 | 8  | 6  | Medium-quality | Genome-fragment | 78.08 | 12.21 |
| S14_vx_k141_19952         | 2360   | No  | NA    | 0  | 1  | Not-determined | Genome-fragment | NA    | 0     |
| S12_extracted_k141_37641  | 1399   | No  | NA    | 1  | 0  | Low-quality    | Genome-fragment | 5.15  | 0     |
| S12_vx_k141_180556        | 1399   | No  | NA    | 1  | 0  | Low-quality    | Genome-fragment | 2.45  | 0     |
| S14_vx_k141_89424         | 1400   | No  | NA    | 0  | 0  | Low-quality    | Genome-fragment | 2.59  | 0     |
| S5_extracted_k141_51130   | 1400   | No  | NA    | 0  | 0  | Low-quality    | Genome-fragment | 2.47  | 0     |
| S14_vx_k141_48196         | 2244   | No  | NA    | 0  | 0  | Not-determined | Genome-fragment | NA    | 0     |
| S5_vx_k141_18831          | 1400   | No  | NA    | 0  | 1  | Low-quality    | Genome-fragment | 1.07  | 0     |
| S14_vx_k141_114951        | 1129   | No  | NA    | 0  | 0  | Not-determined | Genome-fragment | NA    | 0     |
| S5_vx_k141_71824          | 1400   | No  | NA    | 2  | 0  | Low-quality    | Genome-fragment | 3.81  | 0     |
| S14_vx_k141_78218         | 3396   | No  | NA    | 1  | 2  | Not-determined | Genome-fragment | NA    | 0     |
| S14_vx_k141_26348         | 1470   | No  | NA    | 0  | 1  | Not-determined | Genome-fragment | NA    | 0     |
| S14_vx_k141_26351         | 3103   | No  | NA    | 0  | 3  | Not-determined | Genome-fragment | NA    | 0     |
| S14_vx_k141_4745          | 3236   | No  | NA    | 0  | 0  | Not-determined | Genome-fragment | NA    | 0     |
| S16_vx_5831               | 1400   | No  | NA    | 0  | 0  | Low-quality    | Genome-fragment | 1.01  | 0     |
| S16_vx_87424              | 1400   | No  | NA    | 1  | 0  | Low-quality    | Genome-fragment | 2.7   | 0     |
| S16_vx_150908             | 1400   | No  | NA    | 1  | 0  | Low-quality    | Genome-fragment | 2.47  | 0     |
| S14_vx_k141_99849         | 2765   | No  | NA    | 1  | 1  | Not-determined | Genome-fragment | NA    | 0     |
| S14_vx_k141_12004         | 5072   | No  | NA    | 0  | 0  | Not-determined | Genome-fragment | NA    | 0     |
| S12_vx_k141_33631         | 1400   | No  | NA    | 2  | 0  | Low-quality    | Genome-fragment | 2.6   | 0     |
| S4_extracted_15963        | 1400   | No  | NA    | 0  | 0  | Low-quality    | Genome-fragment | 3.51  | 0     |
| S6_vx_k141_24720          | 1400   | No  | NA    | 1  | 0  | Low-quality    | Genome-fragment | 1.7   | 0     |
| S14_vx_k141_42052         | 1004   | No  | NA    | 0  | 1  | Not-determined | Genome-fragment | NA    | 0     |
| S14_vx_k141_4799          | 3945   | No  | NA    | 0  | 2  | Not-determined | Genome-fragment | NA    | 0     |
| S8_vx_k141_137626         | 1400   | No  | NA    | 0  | 1  | Low-quality    | Genome-fragment | 2.76  | 0     |
| S14_vx_k141_85759         | 5913   | No  | NA    | 0  | 4  | Not-determined | Genome-fragment | NA    | 0     |
| S14_vx_k141_93211         | 1520   | No  | NA    | 0  | 0  | Not-determined | Genome-fragment | NA    | 0     |
| S14_vx_k141_99008         | 1210   | No  | NA    | 0  | 1  | Not-determined | Genome-fragment | NA    | 0     |
| S14_vx_k141_107829        | 2104   | No  | NA    | 0  | 1  | Not-determined | Genome-fragment | NA    | 0     |
| S14_vx_k141_4847          | 2572   | No  | NA    | 0  | 2  | Not-determined | Genome-fragment | NA    | 0     |
| S14_vx_k141_78282         | 2080   | No  | NA    | 0  | 0  | Not-determined | Genome-fragment | NA    | 0     |
| S14_vx_k141_78296         | 1384   | No  | NA    | 0  | 0  | Not-determined | Genome-fragment | NA    | 0     |
| S14_vx_k141_93237         | 1219   | No  | NA    | 0  | 0  | Not-determined | Genome-fragment | NA    | 0     |
| S17_vx_k141_17398         | 1401   | No  | NA    | 1  | 0  | Low-quality    | Genome-fragment | 1.57  | 0     |
| S9_vx_k141_47537          | 1401   | No  | NA    | 0  | 1  | Low-quality    | Genome-fragment | 2.9   | 0     |
| S14_vx_k141_12087         | 1496   | No  | NA    | 0  | 1  | Not-determined | Genome-fragment | NA    | 0     |
| S13_vx_4321               | 1401   | No  | NA    | 1  | 0  | Low-quality    | Genome-fragment | 0.63  | 0     |
| S14_vx_k141_99951         | 1343   | No  | NA    | 0  | 1  | Not-determined | Genome-fragment | NA    | 0     |
| S14_vx_k141_53659         | 1401   | No  | NA    | 0  | 1  | Low-quality    | Genome-fragment | 3.01  | 0     |
| S3_extracted_k141_113642  | 1401   | No  | NA    | 2  | 0  | Low-quality    | Genome-fragment | 2.22  | 0     |
| S5_vx_k141_11718          | 1401   | No  | NA    | 0  | 1  | Low-quality    | Genome-fragment | 0.43  | 0     |
| S14_vx_k141_56251         | 31100  | No  | NA    | 18 | 1  | Medium-quality | Genome-fragment | 75.74 | 0     |
| S14_vx_k141_115062        | 1735   | No  | NA    | 0  | 0  | Not-determined | Genome-fragment | NA    | 0     |
| S14_vx_k141_56261         | 2466   | No  | NA    | 0  | 1  | Not-determined | Genome-fragment | NA    | 0     |
| S14_vx_k141_115075        | 1248   | No  | NA    | 0  | 0  | Not-determined | Genome-fragment | NA    | 0     |
| S14_vx_k141_70985         | 158000 | No  | NA    | 4  | 46 | Medium-quality | Genome-fragment | 77.59 | 0     |
| S7_vx_854                 | 1401   | No  | NA    | 0  | 1  | Low-quality    | Genome-fragment | 2.45  | 0     |
| S7_vx_44561               | 1401   | No  | NA    | 0  | 0  | Low-quality    | Genome-fragment | 2.42  | 0     |
| S14_vx_k141_93284         | 1281   | No  | NA    | 0  | 1  | Not-determined | Genome-fragment | NA    | 0     |
| S14_vx_k141_63402         | 1196   | No  | NA    | 0  | 1  | Not-determined | Genome-fragment | NA    | 0     |
| S10_vx_15076              | 1401   | No  | NA    | 0  | 0  | Low-quality    | Genome-fragment | 2.12  | 0     |
| S15_extracted_59383       | 1401   | No  | NA    | 0  | 1  | Low-quality    | Genome-fragment | 0.54  | 0     |
| S8_extracted_k141_206020  | 1401   | No  | NA    | 0  | 2  | Low-quality    | Genome-fragment | 3.24  | 0     |
| S14_vx_k141_42195         | 2371   | No  | NA    | 0  | 0  | Not-determined | Genome-fragment | NA    | 0     |
| S8_vx_k141_43913          | 1401   | No  | NA    | 0  | 1  | Low-quality    | Genome-fragment | 3.47  | 0     |
| S14_vx_k141_93354         | 2137   | No  | NA    | 0  | 2  | Not-determined | Genome-fragment | NA    | 0     |
| S14_vx_k141_48416         | 5289   | No  | NA    | 0  | 3  | Not-determined | Genome-fragment | NA    | 0     |
| S14_vx_k141_12167         | 1275   | No  | NA    | 0  | 0  | Not-determined | Genome-fragment | NA    | 0     |
| S14_vx_k141_71051         | 1241   | No  | NA    | 0  | 2  | Not-determined | Genome-fragment | NA    | 0     |
| S3_extracted_k141_64880   | 1402   | No  | NA    | 3  | 0  | Low-quality    | Genome-fragment | 6.4   | 0     |
| S14_vx_k141_24200         | 4816   | No  | NA    | 0  | 2  | Not-determined | Genome-fragment | NA    | 0     |
| S12_vx_k141_140580        | 1402   | No  | NA    | 0  | 0  | Low-quality    | Genome-fragment | 3.6   | 0     |
| S12_vx_k141_59957         | 1402   | No  | NA    | 1  | 0  | Low-quality    | Genome-fragment | 3.35  | 0     |
| S15_vx_70553              | 1402   | No  | NA    | 0  | 0  | Low-quality    | Genome-fragment | 2.24  | 0     |
| S17_extracted_k141_135821 | 1403   | No  | NA    | 4  | 0  | Low-quality    | Genome-fragment | 4.6   | 0     |
| S3_vx_k141_48910          | 1403   | No  | NA    | 0  | 0  | Low-quality    | Genome-fragment | 1.75  | 0     |
| S3_vx_k141_22838          | 1403   | No  | NA    | 0  | 1  | Low-quality    | Genome-fragment | 2.06  | 0     |
| S5_vx_k141_72607          | 1403   | No  | NA    | 0  | 1  | Low-quality    | Genome-fragment | 1.91  | 0     |
| S14_vx_k141_115202        | 1132   | No  | NA    | 0  | 1  | Not-determined | Genome-fragment | NA    | 0     |
| S16_vx_117760             | 1403   | No  | NA    | 0  | 2  | Low-quality    | Genome-fragment | 1.16  | 0     |
| S14_vx_k141_265221        | 6819   | No  | NA    | 0  | 4  | Not-determined | Genome-fragment | NA    | 0     |
| S16_vx_146828             | 1403   | No  | NA    | 0  | 0  | Low-quality    | Genome-fragment | 3.39  | 0     |
| S14_vx_k141_63514         | 1201   | No  | NA    | 0  | 0  | Not-determined | Genome-fragment | NA    | 0     |
| S10_extracted_12866       | 1403   | No  | NA    | 1  | 0  | Low-quality    | Genome-fragment | 1.12  | 0     |
| S14_vx_k141_56410         | 19996  | No  | NA    | 7  | 0  | Medium-quality | Genome-fragment | 50.21 | 0     |
| S14_vx_k141_78500         | 1635   | No  | NA    | 0  | 0  | Not-determined | Genome-fragment | NA    | 0     |
| S12_vx_k141_176841        | 1403   | No  | NA    | 0  | 1  | Low-quality    | Genome-fragment | 0.99  | 0     |
| S14_extracted_k141_11450  | 1404   | No  | NA    | 2  | 0  | Low-quality    | Genome-fragment | 2.34  | 0     |
| S14_vx_k141_108029        | 3548   | No  | NA    | 0  | 4  | Not-determined | Genome-fragment | NA    | 0     |
| S14_vx_k141_12216         | 6583   | No  | NA    | 0  | 5  | Not-determined | Genome-fragment | NA    | 0     |
| S1_extracted_k141_60373   | 1404   | No  | NA    | 0  |    |                |                 |       |       |



|                            |       |    |    |     |    |                |                 |       |   |
|----------------------------|-------|----|----|-----|----|----------------|-----------------|-------|---|
| S13_vx_149929  full        | 1405  | No | NA | 0   | 0  | Low-quality    | Genome-fragment | 3.55  | 0 |
| S14_vx_k141_100017  full   | 1405  | No | NA | 1   | 0  | Low-quality    | Genome-fragment | 3.11  | 0 |
| S14_vx_k141_108159  full   | 1381  | No | NA | 0   | 0  | Not-determined | Genome-fragment | NA    | 0 |
| S14_vx_k141_115377  full   | 24316 | No | NA | 10  | 0  | Medium-quality | Genome-fragment | 53.35 | 0 |
| S1_extraced_k141_126854    | 1405  | No | NA | 0   | 0  | Low-quality    | Genome-fragment | 2.45  | 0 |
| S14_vx_k141_345481  full   | 4626  | No | NA | 0   | 4  | Not-determined | Genome-fragment | NA    | 0 |
| S1_extraced_k141_119293    | 1405  | No | NA | 0   | 0  | Low-quality    | Genome-fragment | 0.96  | 0 |
| S3_vx_k141_104964  full    | 1405  | No | NA | 0   | 0  | Low-quality    | Genome-fragment | 3.53  | 0 |
| S14_vx_k141_63741  full    | 2056  | No | NA | 0   | 2  | Not-determined | Genome-fragment | NA    | 0 |
| S3_vx_k141_91808  full     | 1405  | No | NA | 2   | 0  | Low-quality    | Genome-fragment | 0.71  | 0 |
| S3_vx_k141_92178  H2gene   | 1405  | No | NA | 1   | 0  | Low-quality    | Genome-fragment | 2.36  | 0 |
| S14_vx_k141_345480  full   | 1452  | No | NA | 0   | 0  | Not-determined | Genome-fragment | NA    | 0 |
| S7_extraced_57687          | 1405  | No | NA | 0   | 0  | Low-quality    | Genome-fragment | 2.35  | 0 |
| S14_vx_k141_34583  full    | 2716  | No | NA | 0   | 2  | Not-determined | Genome-fragment | NA    | 0 |
| S14_vx_k141_26768  full    | 8632  | No | NA | 0   | 5  | Not-determined | Genome-fragment | NA    | 0 |
| S14_vx_k141_108193  full   | 2865  | No | NA | 0   | 0  | Not-determined | Genome-fragment | NA    | 0 |
| S16_vx_171681  full        | 1405  | No | NA | 0   | 1  | Low-quality    | Genome-fragment | 1.06  | 0 |
| S10_vx_87897  full         | 1405  | No | NA | 1   | 0  | Low-quality    | Genome-fragment | 1.77  | 0 |
| S14_vx_k141_425771  full   | 12726 | No | NA | 0   | 11 | Not-determined | Genome-fragment | NA    | 0 |
| S4_extraced_28323          | 1405  | No | NA | 0   | 0  | Low-quality    | Genome-fragment | 2.12  | 0 |
| S14_vx_k141_108218  full   | 1290  | No | NA | 0   | 0  | Not-determined | Genome-fragment | NA    | 0 |
| S8_vx_k141_155891  full    | 1405  | No | NA | 0   | 0  | Low-quality    | Genome-fragment | 4.17  | 0 |
| S14_vx_k141_93565  full    | 16641 | No | NA | 8   | 0  | Medium-quality | Genome-fragment | 70.27 | 0 |
| S17_vx_k141_78281  full    | 1406  | No | NA | 1   | 0  | Low-quality    | Genome-fragment | 0.11  | 0 |
| S14_vx_k141_71397  full    | 3157  | No | NA | 0   | 1  | Not-determined | Genome-fragment | NA    | 0 |
| S14_extraced_k141_44157    | 1406  | No | NA | 2   | 0  | Low-quality    | Genome-fragment | 1.51  | 0 |
| S14_vx_k141_56642  full    | 1310  | No | NA | 0   | 0  | Not-determined | Genome-fragment | NA    | 0 |
| S1_vx_k141_151255  full    | 1406  | No | NA | 0   | 1  | Low-quality    | Genome-fragment | 0.82  | 0 |
| S14_vx_k141_56643  full    | 1542  | No | NA | 0   | 0  | Not-determined | Genome-fragment | NA    | 0 |
| S14_vx_k141_12542  full    | 2130  | No | NA | 0   | 0  | Not-determined | Genome-fragment | NA    | 0 |
| S14_vx_k141_20193  full    | 48326 | No | NA | 22  | 1  | High-quality   | High-quality    | 100   | 0 |
| S14_vx_k141_26872  full    | 2316  | No | NA | 0   | 0  | Not-determined | Genome-fragment | NA    | 0 |
| S3_vx_k141_42453  full     | 1406  | No | NA | 3   | 0  | Low-quality    | Genome-fragment | 4.65  | 0 |
| S14_vx_k141_34725  full    | 1219  | No | NA | 0   | 0  | Not-determined | Genome-fragment | NA    | 0 |
| S14_vx_k141_42705  full    | 7484  | No | NA | 0   | 5  | Not-determined | Genome-fragment | NA    | 0 |
| S5_extraced_k141_38634     | 1406  | No | NA | 0   | 0  | Low-quality    | Genome-fragment | 4.14  | 0 |
| S5_vx_k141_85486  H2gene   | 1406  | No | NA | 2   | 0  | Low-quality    | Genome-fragment | 2.49  | 0 |
| S7_vx_35740  full          | 1406  | No | NA | 0   | 1  | Low-quality    | Genome-fragment | 1.64  | 0 |
| S14_vx_k141_427218  full   | 1167  | No | NA | 0   | 0  | Not-determined | Genome-fragment | NA    | 0 |
| S14_vx_k141_100470  full   | 1276  | No | NA | 0   | 0  | Not-determined | Genome-fragment | NA    | 0 |
| S14_vx_k141_34768  full    | 2455  | No | NA | 0   | 2  | Not-determined | Genome-fragment | NA    | 0 |
| S14_vx_k141_93661  full    | 5972  | No | NA | 0   | 3  | Not-determined | Genome-fragment | NA    | 0 |
| S7_vx_137273  full         | 1406  | No | NA | 0   | 1  | Low-quality    | Genome-fragment | 0.44  | 0 |
| S12_extraced_k141_161611   | 1406  | No | NA | 0   | 0  | Low-quality    | Genome-fragment | 3.54  | 0 |
| S12_vx_k141_142949  full   | 1406  | No | NA | 0   | 3  | Low-quality    | Genome-fragment | 2.06  | 0 |
| S14_vx_k141_115455  full   | 4884  | No | NA | 15  | 1  | Medium-quality | Genome-fragment | 67.27 | 0 |
| S14_vx_k141_100488  full   | 2151  | No | NA | 0   | 1  | Not-determined | Genome-fragment | NA    | 0 |
| S8_extraced_k141_69444     | 1406  | No | NA | 0   | 2  | Low-quality    | Genome-fragment | 0.91  | 0 |
| S8_vx_k141_109649  full    | 1406  | No | NA | 0   | 0  | Low-quality    | Genome-fragment | 3.09  | 0 |
| S14_vx_k141_71438  full    | 1169  | No | NA | 0   | 1  | Not-determined | Genome-fragment | NA    | 0 |
| S14_vx_k141_5339  full     | 2460  | No | NA | 0   | 3  | Not-determined | Genome-fragment | NA    | 0 |
| S11_extraced_k141_30556    | 1407  | No | NA | 0   | 0  | Low-quality    | Genome-fragment | 2.45  | 0 |
| S14_vx_k141_26993  full    | 1270  | No | NA | 0   | 1  | Not-determined | Genome-fragment | NA    | 0 |
| S14_vx_k141_56733  full    | 2777  | No | NA | 0   | 3  | Not-determined | Genome-fragment | NA    | 0 |
| S14_extraced_k141_6679     | 1407  | No | NA | 1   | 0  | Low-quality    | Genome-fragment | 1.52  | 0 |
| S1_extraced_k141_157233    | 1407  | No | NA | 0   | 0  | Low-quality    | Genome-fragment | 2.67  | 0 |
| S14_vx_k141_108337  full   | 1043  | No | NA | 0   | 0  | Not-determined | Genome-fragment | NA    | 0 |
| S5_extraced_k141_115154    | 1407  | No | NA | 0   | 0  | Low-quality    | Genome-fragment | 2.42  | 0 |
| S14_vx_k141_12662  full    | 2278  | No | NA | 0   | 0  | Not-determined | Genome-fragment | NA    | 0 |
| S7_vx_119069  H2gene       | 1407  | No | NA | 1   | 0  | Low-quality    | Genome-fragment | 0.97  | 0 |
| S16_extraced_136490        | 1407  | No | NA | 0   | 0  | Low-quality    | Genome-fragment | 2.96  | 0 |
| S10_vx_35382  full         | 1407  | No | NA | 0   | 1  | Low-quality    | Genome-fragment | 1.17  | 0 |
| S12_vx_k141_40346  full    | 1407  | No | NA | 0   | 0  | Low-quality    | Genome-fragment | 2.53  | 0 |
| S8_vx_k141_95863  full     | 1407  | No | NA | 0   | 0  | Low-quality    | Genome-fragment | 1.74  | 0 |
| S13_vx_2568  full          | 1408  | No | NA | 0   | 0  | Low-quality    | Genome-fragment | 2.8   | 0 |
| S14_vx_k141_583  full      | 1408  | No | NA | 0   | 2  | Low-quality    | Genome-fragment | 1.52  | 0 |
| S14_vx_k141_34899  full    | 1878  | No | NA | 0   | 1  | Not-determined | Genome-fragment | NA    | 0 |
| S1_vx_k141_103446  full    | 1408  | No | NA | 1   | 0  | Low-quality    | Genome-fragment | 2.79  | 0 |
| S14_vx_k141_27049  full    | 6269  | No | NA | 0   | 1  | Not-determined | Genome-fragment | NA    | 0 |
| S14_vx_k141_108376  full   | 19905 | No | NA | 9   | 1  | Medium-quality | Genome-fragment | 55    | 0 |
| S7_vx_99448  full          | 1408  | No | NA | 1   | 0  | Low-quality    | Genome-fragment | 4.32  | 0 |
| S7_vx_112121  H2gene       | 1408  | No | NA | 0   | 0  | Low-quality    | Genome-fragment | 4.65  | 0 |
| S16_vx_130658  H2gene      | 1408  | No | NA | 1   | 0  | Low-quality    | Genome-fragment | 2.45  | 0 |
| S14_vx_k141_78735  full    | 5404  | No | NA | 0   | 2  | Not-determined | Genome-fragment | NA    | 0 |
| S14_vx_k141_27062  full    | 1623  | No | NA | 0   | 3  | Not-determined | Genome-fragment | NA    | 0 |
| S10_vx_75252  full         | 1408  | No | NA | 0   | 2  | Low-quality    | Genome-fragment | 0.69  | 0 |
| S14_vx_k141_108396  full   | 1311  | No | NA | 0   | 1  | Not-determined | Genome-fragment | NA    | 0 |
| S14_vx_k141_48894  full    | 1024  | No | NA | 0   | 0  | Not-determined | Genome-fragment | NA    | 0 |
| S12_vx_k141_105333  H2gene | 1408  | No | NA | 0   | 0  | Low-quality    | Genome-fragment | 2.93  | 0 |
| S14_vx_k141_34934  full    | 1159  | No | NA | 0   | 0  | Not-determined | Genome-fragment | NA    | 0 |
| S17_vx_k141_89510  full    | 1409  | No | NA | 0   | 0  | Low-quality    | Genome-fragment | 2     | 0 |
| S9_extraced_k141_76644     | 1409  | No | NA | 0   | 0  | Low-quality    | Genome-fragment | 0.71  | 0 |
| S14_vx_k141_5418  full     | 1797  | No | NA | 0   | 3  | Not-determined | Genome-fragment | NA    | 0 |
| S14_vx_k141_63981  full    | 1651  | No | NA | 0   | 1  | Not-determined | Genome-fragment | NA    | 0 |
| S11_vx_k141_93428  full    | 1409  | No | NA | 0   | 0  | Low-quality    | Genome-fragment | 3.22  | 0 |
| S14_vx_k141_65827  full    | 1409  | No | NA | 2   | 0  | Low-quality    | Genome-fragment | 4.41  | 0 |
| S14_vx_k141_56834  full    | 1466  | No | NA | 0   | 2  | Not-determined | Genome-fragment | NA    | 0 |
| S14_vx_k141_78789  full    | 1389  | No | NA | 0   | 1  | Not-determined | Genome-fragment | NA    | 0 |
| S3_vx_k141_84663  full     | 1409  | No | NA | 0   | 1  | Low-quality    | Genome-fragment | 0.83  | 0 |
| S14_vx_k141_12788  full    | 1568  | No | NA | 0   | 2  | Not-determined | Genome-fragment | NA    | 0 |
| S3_vx_k141_20480  H2gene   | 1409  | No | NA | 1   | 0  | Low-quality    | Genome-fragment | 3.35  | 0 |
| S14_vx_k141_20437  full    | 1511  | No | NA | 0   | 1  | Not-determined | Genome-fragment | NA    | 0 |
| S14_vx_k141_86335  full    | 5924  | No | NA | 0   | 4  | Not-determined | Genome-fragment | NA    | 0 |
| S14_vx_k141_27153  full    | 1640  | No | NA | 0   | 1  | Not-determined | Genome-fragment | NA    | 0 |
| S5_vx_k141_191910  H2gene  | 1409  | No | NA | 0   | 0  | Low-quality    | Genome-fragment | 2.06  | 0 |
| S16_extraced_1005          | 1409  | No | NA | 1   | 0  | Low-quality    | Genome-fragment | 4.07  | 0 |
| S16_extraced_80526         | 1409  | No | NA | 2   | 0  | Low-quality    | Genome-fragment | 4.39  | 0 |
| S14_vx_k141_42940  full    | 2953  | No | NA | 0   | 2  | Not-determined | Genome-fragment | NA    | 0 |
| S16_vx_38647  full         | 1409  | No | NA | 0   | 0  | Low-quality    | Genome-fragment | 0.87  | 0 |
| S12_vx_k141_17400  H2gene  | 1409  | No | NA | 1   | 0  | Low-quality    | Genome-fragment | 0.97  | 0 |
| S14_vx_k141_71631  full    | 2207  | No | NA | 0   | 1  | Not-determined | Genome-fragment | NA    | 0 |
| S8_extraced_k141_196984    | 1409  | No | NA | 0   | 0  | Low-quality    | Genome-fragment | 22.1  | 0 |
| S9_vx_k141_6056  full      | 1410  | No | NA | 0   | 1  | Low-quality    | Genome-fragment | 3.07  | 0 |
| S13_extraced_95667         | 1006  | No | NA | 0   | 0  | Not-determined | Genome-fragment | NA    | 0 |
| S14_vx_k141_12862  full    | 1410  | No | NA | 0   | 0  | Low-quality    | Genome-fragment | 2.31  | 0 |
| S14_vx_k141_12868  full    | 2615  | No | NA | 0   | 1  | Not-determined | Genome-fragment | NA    | 0 |
| S14_vx_k141_12868  full    | 3275  | No | NA | 0   | 3  | Not-determined | Genome-fragment | NA    | 0 |
| S14_vx_k141_78833  full    | 2621  | No | NA | 0   | 2  | Not-determined | Genome-fragment | NA    | 0 |
| S14_vx_k141_71653  full    | 2524  | No | NA | 0   | 0  | Not-determined | Genome-fragment | NA    | 0 |
| S5_extraced_k141_61455     | 1410  | No | NA | 1   | 0  | Low-quality    | Genome-fragment | 1.59  | 0 |
| S7_vx_11818  full          | 1410  | No | NA | 0   | 1  | Low-quality    | Genome-fragment | 3.43  | 0 |
| S14_vx_k141_49023  full    | 10696 | No | NA | 0   | 7  | Not-determined | Genome-fragment | NA    | 0 |
| S14_vx_k141_86421  full    | 2387  | No | NA | 0   | 2  | Not-determined | Genome-fragment | NA    | 0 |
| S14_vx_k141_27178  full    | 2103  | No | NA | 0   | 4  | Not-determined | Genome-fragment | NA    | 0 |
| S7_vx_120441  full         | 1410  | No | NA | 0   | 0  | Low-quality    | Genome-fragment | 2.07  | 0 |
| S14_vx_k141_27279  full    | 3105  | No | NA | 0   | 1  | Not-determined | Genome-fragment | NA    | 0 |
| S14_vx_k141_71678  full    | 2819  | No | NA | 0   | 4  | Not-determined | Genome-fragment | NA    | 0 |
| S14_vx_k141_27195  full    | 1277  | No | NA | 0   | 0  | Not-determined | Genome-fragment | NA    | 0 |
| S8_vx_k141_17677  full     | 1410  | No | NA | 0   | 0  | Low-quality    | Genome-fragment | 4.5   | 0 |
| S14_vx_k141_12914  full    | 1472  | No | NA | 0   | 0  | Not-determined | Genome-fragment | NA    | 0 |
| S14_vx_k141_93937  full    | 2891  | No | NA | 0   | 1  | Not-determined | Genome-fragment | NA    | 0 |
| S14_vx_k141_78894  full    | 1133  | No | NA | 0   | 0  | Not-determined | Genome-fragment | NA    | 0 |
| S9_vx_k141_17991  full     | 1411  | No | NA | 0   | 0  | Low-quality    | Genome-fragment | 4.5   | 0 |
| S11_extraced_k141_62570    | 1411  | No | NA | 0   | 3  | Low-quality    | Genome-fragment | 2.82  | 0 |
| S14_vx_k141_13626  full    | 1411  | No | NA | 0   | 0  | Low-quality    | Genome-fragment | 1.2   | 0 |
| S1_vx_k141_43629  full     | 1411  | No | NA | 3   | 0  | Low-quality    | Genome-fragment | 3.66  | 0 |
| S14_vx_k141_27241  full    | 2940  | No | NA | 0   | 3  | Not-determined | Genome-fragment | NA    | 0 |
| S3_vx_k141_105942  H2gene  | 1411  | No | NA | 0   | 0  | Low-quality    | Genome-fragment | 3.21  | 0 |
| S14_vx_k141_108553  full   | 1194  | No | NA | 0   | 0  | Not-determined | Genome-fragment | NA    | 0 |
| S5_vx_k141_136814  full    | 1411  | No | NA | 2   | 0  | Low-quality    | Genome-fragment | 1.11  | 0 |
| S16_extraced_103142        | 1411  | No | NA | 0   | 0  | Low-quality    | Genome-fragment | 1.95  | 0 |
| S16_vx_134070  full        | 1411  | No | NA | 1   | 1  | Low-quality    | Genome-fragment | 1     | 0 |
| S14_vx_k141_43112  full    | 1521  | No | NA | 0   | 1  | Not-determined | Genome-fragment | NA    | 0 |
| S14_vx_k141_108570  full   | 4484  | No | NA | 0   | 6  | Not-determined | Genome-fragment | NA    | 0 |
| S10_vx_13324  full         | 1411  | No | NA | 2   | 0  | Low-quality    | Genome-fragment | 2.26  | 0 |
| S14_vx_k141_27279  full    | 7875  | No | NA | 0   | 5  | Not-determined | Genome-fragment | NA    | 0 |
| S10_vx_28166  full         | 1411  | No | NA | 0   | 0  | Low-quality    | Genome-fragment | 2.94  | 0 |
| S14_vx_k141_35244  full    | 1243  | No | NA | 0   | 1  | Not-determined | Genome-fragment | NA    | 0 |
| S10_vx_77663  full         | 1411  | No | NA | 1   | 0  | Low-quality    | Genome-fragment | 2.19  | 0 |
| S6_vx_k141_52038  full     | 1411  | No | NA | 0   | 2  | Low-quality    | Genome-fragment | 0.83  | 0 |
| S14_vx_k141_56989  full    | 1458  | No | NA | 0   | 0  | Not-determined | Genome-fragment | NA    | 0 |
| S6_vx_k141_56463  full     | 1411  | No | NA | 0</ |    |                |                 |       |   |



|                               |       |    |   |   |                |                 |       |   |
|-------------------------------|-------|----|---|---|----------------|-----------------|-------|---|
| 58_vs_k141_112230  full       | 1413  | NA | 1 | 0 | Low-quality    | Genome-fragment | 3.22  | 0 |
| S11_extracted_k141_1979  full | 1414  | NA | 0 | 0 | Low-quality    | Genome-fragment | 3.64  | 0 |
| S1_vs_k141_980  H2gene        | 1414  | NA | 2 | 0 | Low-quality    | Genome-fragment | 2.6   | 0 |
| S10_vs_20219  full            | 1414  | NA | 0 | 0 | Low-quality    | Genome-fragment | 3.36  | 0 |
| S14_vs_k141_94320  full       | 3415  | NA | 0 | 2 | Not-determined | Genome-fragment | NA    | 0 |
| S14_vs_k141_35148  full       | 3970  | NA | 0 | 4 | Not-determined | Genome-fragment | NA    | 0 |
| S12_extracted_k141_959        | 1414  | NA | 0 | 0 | Low-quality    | Genome-fragment | 2.79  | 0 |
| S12_extracted_k141_187394     | 1414  | NA | 0 | 0 | Low-quality    | Genome-fragment | 2.23  | 0 |
| S15_extracted_23167           | 1414  | NA | 0 | 0 | Low-quality    | Genome-fragment | 0.84  | 0 |
| S14_vs_k141_101105  full      | 2766  | NA | 0 | 2 | Not-determined | Genome-fragment | NA    | 0 |
| S15_vs_5155  full             | 1414  | NA | 1 | 0 | Low-quality    | Genome-fragment | 2.76  | 0 |
| S8_vs_k141_112027  full       | 1414  | NA | 0 | 0 | Low-quality    | Genome-fragment | 2.47  | 0 |
| S8_vs_k141_151310  full       | 1414  | NA | 1 | 0 | Low-quality    | Genome-fragment | 2.47  | 0 |
| S11_vs_k141_16282  full       | 1415  | NA | 0 | 0 | Low-quality    | Genome-fragment | 0.8   | 0 |
| S1_extracted_k141_36038       | 1415  | NA | 0 | 1 | Low-quality    | Genome-fragment | 0.24  | 0 |
| S5_extracted_k141_8403        | 1415  | NA | 0 | 0 | Low-quality    | Genome-fragment | 2.98  | 0 |
| S14_vs_k141_35410  full       | 1147  | NA | 0 | 1 | Not-determined | Genome-fragment | NA    | 0 |
| S14_vs_k141_5887  full        | 3883  | NA | 0 | 2 | Not-determined | Genome-fragment | NA    | 0 |
| S5_vs_k141_51261  H2gene      | 1415  | NA | 1 | 0 | Low-quality    | Genome-fragment | 2.77  | 0 |
| S16_extracted_160726          | 1415  | NA | 0 | 0 | Low-quality    | Genome-fragment | 2.42  | 0 |
| S14_vs_k141_49309  full       | 1234  | NA | 0 | 1 | Not-determined | Genome-fragment | NA    | 0 |
| S16_vs_13455  full            | 1415  | NA | 0 | 0 | Low-quality    | Genome-fragment | 1.84  | 0 |
| S16_vs_159084  full           | 1415  | NA | 0 | 1 | Low-quality    | Genome-fragment | 0.87  | 0 |
| S10_vs_34981  full            | 1415  | NA | 0 | 0 | Low-quality    | Genome-fragment | 3.11  | 0 |
| S14_vs_k141_13248  full       | 2233  | NA | 0 | 2 | Not-determined | Genome-fragment | NA    | 0 |
| S14_vs_k141_94593  full       | 1553  | NA | 0 | 0 | Not-determined | Genome-fragment | NA    | 0 |
| S14_vs_k141_35463  full       | 2960  | NA | 0 | 2 | Not-determined | Genome-fragment | NA    | 0 |
| S17_vs_k141_142064  full      | 1416  | NA | 0 | 1 | Low-quality    | Genome-fragment | 1.81  | 0 |
| S14_vs_k141_101172  full      | 2607  | NA | 0 | 1 | Not-determined | Genome-fragment | NA    | 0 |
| S14_vs_k141_94409  full       | 2076  | NA | 0 | 0 | Not-determined | Genome-fragment | NA    | 0 |
| S14_vs_k141_57266  full       | 1911  | NA | 0 | 0 | Not-determined | Genome-fragment | NA    | 0 |
| S14_vs_k141_13306  full       | 4614  | NA | 0 | 1 | Not-determined | Genome-fragment | NA    | 0 |
| S9_vs_k141_79683  H2gene      | 1416  | NA | 1 | 0 | Low-quality    | Genome-fragment | 3.26  | 0 |
| S14_vs_k141_13310  full       | 6460  | NA | 0 | 1 | Not-determined | Genome-fragment | NA    | 0 |
| S14_extracted_k141_96924      | 1416  | NA | 0 | 0 | Low-quality    | Genome-fragment | 1.98  | 0 |
| S14_vs_k141_21021  full       | 1139  | NA | 0 | 1 | Not-determined | Genome-fragment | NA    | 0 |
| S14_vs_k141_101211  full      | 1118  | NA | 0 | 0 | Not-determined | Genome-fragment | NA    | 0 |
| S3_vs_k141_70307  full        | 1416  | NA | 0 | 2 | Low-quality    | Genome-fragment | 0.91  | 0 |
| S5_vs_k141_31952  full        | 1416  | NA | 0 | 0 | Low-quality    | Genome-fragment | 1.59  | 0 |
| S14_vs_k141_94458  full       | 2680  | NA | 0 | 1 | Not-determined | Genome-fragment | NA    | 0 |
| S12_extracted_k141_65880      | 1416  | NA | 1 | 0 | Low-quality    | Genome-fragment | 0.87  | 0 |
| S12_vs_k141_7898  full        | 1416  | NA | 1 | 1 | Low-quality    | Genome-fragment | 2.92  | 0 |
| S14_vs_k141_57342  full       | 1175  | NA | 0 | 0 | Not-determined | Genome-fragment | NA    | 0 |
| S12_vs_k141_37086  full       | 1416  | NA | 0 | 1 | Low-quality    | Genome-fragment | 1.66  | 0 |
| S14_vs_k141_5990  full        | 1389  | NA | 0 | 1 | Not-determined | Genome-fragment | NA    | 0 |
| S14_vs_k141_94475  full       | 2316  | NA | 0 | 2 | Not-determined | Genome-fragment | NA    | 0 |
| S8_extracted_k141_112695      | 1416  | NA | 0 | 1 | Low-quality    | Genome-fragment | 0.32  | 0 |
| S8_vs_k141_107404  H2gene     | 1416  | NA | 2 | 0 | Low-quality    | Genome-fragment | 4.33  | 0 |
| S14_vs_k141_21040  full       | 1712  | NA | 0 | 1 | Not-determined | Genome-fragment | NA    | 0 |
| S17_extracted_k141_163096     | 1417  | NA | 0 | 1 | Low-quality    | Genome-fragment | 2.59  | 0 |
| S14_vs_k141_101256  full      | 1364  | NA | 0 | 0 | Not-determined | Genome-fragment | NA    | 0 |
| S9_vs_k141_70418  full        | 1417  | NA | 0 | 0 | Low-quality    | Genome-fragment | 2.24  | 0 |
| S11_vs_k141_46549  full       | 1417  | NA | 0 | 0 | Low-quality    | Genome-fragment | 1.28  | 0 |
| S14_vs_k141_8711  full        | 1417  | NA | 0 | 0 | Low-quality    | Genome-fragment | 1.99  | 0 |
| S14_vs_k141_72072  full       | 2625  | NA | 0 | 0 | Not-determined | Genome-fragment | NA    | 0 |
| S5_extracted_k141_113917      | 1417  | NA | 4 | 0 | Low-quality    | Genome-fragment | 3.84  | 0 |
| S14_vs_k141_64389  full       | 1951  | NA | 0 | 4 | Not-determined | Genome-fragment | NA    | 0 |
| S14_vs_k141_94519  full       | 1490  | NA | 0 | 0 | Not-determined | Genome-fragment | NA    | 0 |
| S14_vs_k141_57396  full       | 1746  | NA | 0 | 1 | Not-determined | Genome-fragment | NA    | 0 |
| S5_vs_k141_4647  full         | 1417  | NA | 2 | 0 | Low-quality    | Genome-fragment | 2.44  | 0 |
| S15_vs_69945  full            | 1417  | NA | 0 | 0 | Low-quality    | Genome-fragment | 2.32  | 0 |
| S10_vs_14888  full            | 1417  | NA | 0 | 0 | Low-quality    | Genome-fragment | 1.78  | 0 |
| S14_vs_k141_87100  full       | 4035  | NA | 0 | 4 | Not-determined | Genome-fragment | NA    | 0 |
| S12_extracted_k141_186779     | 1417  | NA | 0 | 0 | Low-quality    | Genome-fragment | 2.92  | 0 |
| S4_extracted_27892            | 1417  | NA | 0 | 0 | Low-quality    | Genome-fragment | 3.26  | 0 |
| S14_vs_k141_79397  full       | 3669  | NA | 0 | 1 | Not-determined | Genome-fragment | NA    | 0 |
| S14_vs_k141_116265  full      | 1196  | NA | 0 | 1 | Not-determined | Genome-fragment | NA    | 0 |
| S14_vs_k141_101324  full      | 1009  | NA | 0 | 0 | Not-determined | Genome-fragment | NA    | 0 |
| S8_extracted_k141_113378      | 1417  | NA | 0 | 0 | Low-quality    | Genome-fragment | 0.39  | 0 |
| S14_vs_k141_94577  full       | 1677  | NA | 0 | 2 | Not-determined | Genome-fragment | NA    | 0 |
| S14_vs_k141_6095  full        | 1538  | NA | 0 | 0 | Not-determined | Genome-fragment | NA    | 0 |
| S8_extracted_k141_51483       | 1417  | NA | 0 | 0 | Low-quality    | Genome-fragment | 3.28  | 0 |
| S14_vs_k141_27862  full       | 1188  | NA | 0 | 0 | Not-determined | Genome-fragment | NA    | 0 |
| S14_vs_k141_27867  full       | 2101  | NA | 0 | 3 | Not-determined | Genome-fragment | NA    | 0 |
| S14_vs_k141_109181  full      | 1136  | NA | 0 | 0 | Not-determined | Genome-fragment | NA    | 0 |
| S8_vs_k141_80750  full        | 1417  | NA | 2 | 0 | Low-quality    | Genome-fragment | 3.23  | 0 |
| S14_vs_k141_116327  full      | 1323  | NA | 0 | 1 | Not-determined | Genome-fragment | NA    | 0 |
| S9_extracted_k141_115981      | 1418  | NA | 1 | 0 | Low-quality    | Genome-fragment | 3.5   | 0 |
| S14_vs_k141_49637  full       | 1821  | NA | 0 | 0 | Not-determined | Genome-fragment | NA    | 0 |
| S14_vs_k141_116336  full      | 1553  | NA | 0 | 0 | Not-determined | Genome-fragment | NA    | 0 |
| S9_vs_k141_42021  full        | 1418  | NA | 0 | 0 | Low-quality    | Genome-fragment | 2.48  | 0 |
| S14_vs_k141_57454  full       | 2204  | NA | 0 | 3 | Not-determined | Genome-fragment | NA    | 0 |
| S13_vs_35207  full            | 1418  | NA | 1 | 0 | Low-quality    | Genome-fragment | 2.83  | 0 |
| S14_vs_k141_57458  full       | 1308  | NA | 0 | 1 | Not-determined | Genome-fragment | NA    | 0 |
| S14_vs_k141_72204  full       | 2908  | NA | 0 | 1 | Not-determined | Genome-fragment | NA    | 0 |
| S13_vs_86462  full            | 1418  | NA | 0 | 0 | Low-quality    | Genome-fragment | 3.12  | 0 |
| S14_vs_k141_94660  full       | 1009  | NA | 0 | 0 | Not-determined | Genome-fragment | NA    | 0 |
| S14_vs_k141_116376  full      | 1353  | NA | 0 | 2 | Not-determined | Genome-fragment | NA    | 0 |
| S14_vs_k141_13430  full       | 2551  | NA | 0 | 2 | Not-determined | Genome-fragment | NA    | 0 |
| S14_vs_k141_35029  full       | 1418  | NA | 3 | 0 | Low-quality    | Genome-fragment | 3.7   | 0 |
| S14_vs_k141_27920  full       | 3203  | NA | 0 | 2 | Not-determined | Genome-fragment | NA    | 0 |
| S14_vs_k141_87211  full       | 3754  | NA | 0 | 0 | Not-determined | Genome-fragment | NA    | 0 |
| S14_vs_k141_87627  full       | 1418  | NA | 1 | 0 | Low-quality    | Genome-fragment | 3.05  | 0 |
| S14_vs_k141_27925  full       | 1477  | NA | 0 | 0 | Not-determined | Genome-fragment | NA    | 0 |
| S14_vs_k141_64472  full       | 2223  | NA | 0 | 2 | Not-determined | Genome-fragment | NA    | 0 |
| S14_vs_k141_13436  full       | 1184  | NA | 0 | 0 | Not-determined | Genome-fragment | NA    | 0 |
| S14_vs_k141_94673  full       | 2357  | NA | 0 | 2 | Not-determined | Genome-fragment | NA    | 0 |
| S14_vs_k141_79505  full       | 40116 | NA | 7 | 3 | Medium-quality | Genome-fragment | 89.03 | 0 |
| S14_vs_k141_14658  H2gene     | 1418  | NA | 0 | 0 | Low-quality    | Genome-fragment | 3.01  | 0 |
| S14_vs_k141_13451  full       | 2692  | NA | 0 | 0 | Not-determined | Genome-fragment | NA    | 0 |
| S14_vs_k141_87250  full       | 2419  | NA | 0 | 0 | Not-determined | Genome-fragment | NA    | 0 |
| S3_extracted_k141_50130       | 1418  | NA | 0 | 1 | Low-quality    | Genome-fragment | 0.96  | 0 |
| S14_vs_k141_72219  full       | 1426  | NA | 0 | 0 | Not-determined | Genome-fragment | NA    | 0 |
| S14_vs_k141_49704  full       | 1683  | NA | 0 | 1 | Not-determined | Genome-fragment | NA    | 0 |
| S7_extracted_56072            | 1418  | NA | 0 | 0 | Low-quality    | Genome-fragment | 2.94  | 0 |
| S14_vs_k141_21224  full       | 6635  | NA | 0 | 4 | Not-determined | Genome-fragment | NA    | 0 |
| S14_vs_k141_57540  full       | 2759  | NA | 0 | 2 | Not-determined | Genome-fragment | NA    | 0 |
| S7_vs_73472  full             | 1418  | NA | 1 | 0 | Low-quality    | Genome-fragment | 2.57  | 0 |
| S14_vs_k141_27951  full       | 8544  | NA | 1 | 7 | Not-determined | Genome-fragment | NA    | 0 |
| S7_vs_98220  full             | 1418  | NA | 0 | 0 | Low-quality    | Genome-fragment | 1.08  | 0 |
| S12_vs_k141_112196  full      | 1418  | NA | 0 | 0 | Low-quality    | Genome-fragment | 1.76  | 0 |
| S14_vs_k141_87280  full       | 1427  | NA | 0 | 0 | Not-determined | Genome-fragment | NA    | 0 |
| S14_vs_k141_35822  full       | 1493  | NA | 0 | 0 | Not-determined | Genome-fragment | NA    | 0 |
| S15_vs_16090  H2gene          | 1418  | NA | 1 | 0 | Low-quality    | Genome-fragment | 2.28  | 0 |
| S6_vs_k141_10074  full        | 1418  | NA | 0 | 0 | Low-quality    | Genome-fragment | 2.4   | 0 |
| S14_vs_k141_109316  full      | 14598 | NA | 0 | 5 | Not-determined | Genome-fragment | NA    | 0 |
| S14_vs_k141_21278  full       | 4498  | NA | 0 | 2 | Not-determined | Genome-fragment | NA    | 0 |
| S14_vs_k141_13533  full       | 2306  | NA | 0 | 0 | Not-determined | Genome-fragment | NA    | 0 |
| S14_vs_k141_79558  full       | 1870  | NA | 0 | 0 | Not-determined | Genome-fragment | NA    | 0 |
| S14_vs_k141_101482  full      | 20333 | NA | 3 | 1 | Medium-quality | Genome-fragment | 54.32 | 0 |
| S14_vs_k141_94788  full       | 1992  | NA | 0 | 1 | Not-determined | Genome-fragment | NA    | 0 |
| S14_vs_k141_94804  full       | 2051  | NA | 0 | 2 | Not-determined | Genome-fragment | NA    | 0 |
| S8_vs_k141_128199  full       | 1418  | NA | 2 | 0 | Low-quality    | Genome-fragment | 2.39  | 0 |
| S17_vs_k141_165235  full      | 1419  | NA | 0 | 3 | Low-quality    | Genome-fragment | 0.44  | 0 |
| S14_vs_k141_28016  full       | 5382  | NA | 0 | 2 | Not-determined | Genome-fragment | NA    | 0 |
| S14_vs_k141_72292  full       | 1989  | NA | 0 | 1 | Not-determined | Genome-fragment | NA    | 0 |
| S14_vs_k141_79637  full       | 1758  | NA | 0 | 1 | Not-determined | Genome-fragment | NA    | 0 |
| S9_extracted_k141_51511       | 1419  | NA | 0 | 1 | Low-quality    | Genome-fragment | 0.93  | 0 |
| S14_vs_k141_79638  full       | 2363  | NA | 0 | 1 | Not-determined | Genome-fragment | NA    | 0 |
| S9_vs_k141_30624  full        | 1419  | NA | 1 | 0 | Low-quality    | Genome-fragment | 3.56  | 0 |
| S11_vs_k141_92066  H2gene     | 1419  | NA | 2 | 0 | Low-quality    | Genome-fragment | 3.23  | 0 |
| S14_vs_k141_43890  full       | 1927  | NA | 0 | 0 | Not-determined | Genome-fragment | NA    | 0 |
| S14_vs_k141_94829  full       | 1682  | NA | 0 | 1 | Not-determined | Genome-fragment | NA    | 0 |
| S14_vs_k141_6417  full        | 2930  | NA | 0 | 3 | Not-determined | Genome-fragment | NA    | 0 |
| S11_vs_k141_9767  H2gene      | 1419  | NA | 1 | 0 | Low-quality    | Genome-fragment | 3.22  | 0 |
| S14_vs_k141_43908  full       | 2231  | NA | 0 | 3 | Not-determined | Genome-fragment | NA    | 0 |
| S5_vs_k141_31577  full        | 1419  | NA | 0 | 0 | Low-quality    | Genome-fragment | 2.27  | 0 |
| S7_vs_14561  full             | 1419  | NA | 0 | 1 | Low-quality    | Genome-fragment | 2.02  | 0 |
| S12_extracted_k141_70529      | 1419  | NA | 1 | 0 | Low-quality    | Genome-fragment | 4.13  | 0 |
| S2_extracted_k141_17149       | 1419  | NA | 1 | 0 | Low-quality    | Genome-fragment | 1.48  | 0 |
| S4_extracted_28836            | 1419  | NA | 2 | 0 | Low-quality    | Genome-fragment | 2.24  | 0 |
| S14_vs_k141_87448  full       | 7482  | NA | 0 | 3 | Not-determined | Genome-fragment | NA    | 0 |
| S14_vs_k141_28118  full       | 4479  | NA | 0 | 1 | Not-determined | Genome-fragment | NA    | 0 |
| S9_vs_k141_88781  full        | 1420  | NA | 3 | 0 | Low-quality    | Genome-fragment | 3.25  | 0 |
| S5_vs_k141_119001  full       | 1420  | NA | 0 | 0 | Low-quality    | Genome-fragment | 3.64  | 0 |
| S7_vs_93072  full             | 1420  | NA | 1 | 0 | Low-quality    | Genome-fragment | 2.56  | 0 |
| S16_vs_39531  full            | 1420  | NA | 0 | 0 | Low-quality    | Genome-fragment | 1.05  | 0 |
| S14_vs_k141_214761  full      | 1577  | NA | 0 | 0 | Not-determined | Genome-fragment | NA    | 0 |
| S10_extracted_55869           | 1420  | NA | 1 | 0 | Low-quality    | Genome-fragment | 3.15  | 0 |
| S14_vs_k141_21484  full       | 2366  | NA | 0 | 1 | Not-determined | Genome-fragment | NA    | 0 |
| S14_vs_k141_109503  full      | 4521  | NA | 0 | 2 | Not-determined | Genome-fragment | NA    | 0 |
| S14_vs_k141_281451  full      | 2842  | NA | 0 | 0 | Not-determined | Genome-fragment | NA    | 0 |
| S                             |       |    |   |   |                |                 |       |   |



|                           |          |       |    |    |   |   |                |                 |    |      |   |
|---------------------------|----------|-------|----|----|---|---|----------------|-----------------|----|------|---|
| S14_vx_k141_116805        | [full]   | 1806  | No | NA | 0 | 0 | Not-determined | Genome-fragment | NA | 4.27 | 0 |
| S8_vx_k141_31178          | [full]   | 1420  | No | NA | 0 | 0 | Low-quality    | Genome-fragment | NA | 0    | 0 |
| S14_vx_k141_101829        | [full]   | 1501  | No | NA | 0 | 0 | Not-determined | Genome-fragment | NA | 0    | 0 |
| S14_vx_k141_13877         | [full]   | 1748  | No | NA | 0 | 3 | Not-determined | Genome-fragment | NA | 0    | 0 |
| S14_vx_k141_21677         | [full]   | 3026  | No | NA | 0 | 1 | Not-determined | Genome-fragment | NA | 0    | 0 |
| S8_vx_k141_596674         | [full]   | 1420  | No | NA | 0 | 0 | Low-quality    | Genome-fragment | NA | 1.95 | 0 |
| S14_vx_k141_80027         | [full]   | 2750  | No | NA | 0 | 0 | Not-determined | Genome-fragment | NA | 0    | 0 |
| S14_vx_k141_101843        | [full]   | 3513  | No | NA | 0 | 1 | Not-determined | Genome-fragment | NA | 0    | 0 |
| S14_vx_k141_80033         | [full]   | 1014  | No | NA | 0 | 1 | Not-determined | Genome-fragment | NA | 0    | 0 |
| S14_vx_k141_109770        | [full]   | 2208  | No | NA | 0 | 1 | Not-determined | Genome-fragment | NA | 0    | 0 |
| S14_vx_k141_95159         | [full]   | 1160  | No | NA | 0 | 0 | Not-determined | Genome-fragment | NA | 0    | 0 |
| S14_vx_k141_58026         | [full]   | 1037  | No | NA | 0 | 1 | Not-determined | Genome-fragment | NA | 0    | 0 |
| S14_vx_k141_87517         | [full]   | 1507  | No | NA | 0 | 0 | Not-determined | Genome-fragment | NA | 0    | 0 |
| S13_vx_4655               | [full]   | 1421  | No | NA | 2 | 0 | Low-quality    | Genome-fragment | NA | 3.81 | 0 |
| S14_vx_k141_21729         | [full]   | 2295  | No | NA | 0 | 1 | Not-determined | Genome-fragment | NA | 0    | 0 |
| S14_vx_k141_46881         | [full]   | 2153  | No | NA | 0 | 0 | Not-determined | Genome-fragment | NA | 0    | 0 |
| S14_vx_k141_72511         | [full]   | 1765  | No | NA | 0 | 0 | Not-determined | Genome-fragment | NA | 0    | 0 |
| S7_vx_123439              | [full]   | 1421  | No | NA | 0 | 0 | Low-quality    | Genome-fragment | NA | 2.54 | 0 |
| S14_vx_k141_109820        | [full]   | 4423  | No | NA | 0 | 0 | Not-determined | Genome-fragment | NA | 0    | 0 |
| S12_vx_k141_42674         | [full]   | 1421  | No | NA | 0 | 0 | Low-quality    | Genome-fragment | NA | 3.13 | 0 |
| S17_vx_k141_143883        | [H2gene] | 1422  | No | NA | 0 | 0 | Low-quality    | Genome-fragment | NA | 2.95 | 0 |
| S14_vx_k141_21774         | [full]   | 2981  | No | NA | 0 | 0 | Not-determined | Genome-fragment | NA | 0    | 0 |
| S14_vx_k141_6767          | [full]   | 6666  | No | NA | 0 | 3 | Not-determined | Genome-fragment | NA | 0    | 0 |
| S14_vx_k141_21796         | [full]   | 2075  | No | NA | 0 | 0 | Not-determined | Genome-fragment | NA | 0    | 0 |
| S14_vx_k141_65030         | [full]   | 2346  | No | NA | 0 | 0 | Not-determined | Genome-fragment | NA | 0    | 0 |
| S14_vx_k141_116910        | [full]   | 1152  | No | NA | 0 | 0 | Not-determined | Genome-fragment | NA | 0    | 0 |
| S9_vx_k141_18750          | [full]   | 1422  | No | NA | 1 | 0 | Low-quality    | Genome-fragment | NA | 2.45 | 0 |
| S11_vx_k141_52063         | [H2gene] | 1422  | No | NA | 1 | 0 | Low-quality    | Genome-fragment | NA | 4.14 | 0 |
| S14_vx_k141_83076         | [full]   | 1422  | No | NA | 0 | 1 | Low-quality    | Genome-fragment | NA | 1.89 | 0 |
| S14_vx_k141_58114         | [full]   | 1547  | No | NA | 0 | 2 | Not-determined | Genome-fragment | NA | 0    | 0 |
| S14_vx_k141_21811         | [full]   | 1999  | No | NA | 0 | 0 | Not-determined | Genome-fragment | NA | 0    | 0 |
| S3_vx_k141_108196         | [full]   | 1422  | No | NA | 0 | 0 | Low-quality    | Genome-fragment | NA | 2.58 | 0 |
| S14_vx_k141_21824         | [full]   | 1000  | No | NA | 0 | 1 | Not-determined | Genome-fragment | NA | 0    | 0 |
| S14_vx_k141_65072         | [full]   | 14656 | No | NA | 0 | 7 | Not-determined | Genome-fragment | NA | 0    | 0 |
| S7_vx_34597               | [full]   | 1422  | No | NA | 0 | 0 | Low-quality    | Genome-fragment | NA | 4.29 | 0 |
| S14_vx_k141_36336         | [full]   | 1760  | No | NA | 0 | 1 | Not-determined | Genome-fragment | NA | 0    | 0 |
| S14_vx_k141_21843         | [full]   | 3139  | No | NA | 0 | 1 | Not-determined | Genome-fragment | NA | 0    | 0 |
| S7_vx_79578               | [full]   | 1422  | No | NA | 0 | 2 | Low-quality    | Genome-fragment | NA | 1.09 | 0 |
| S14_vx_k141_87657         | [full]   | 1018  | No | NA | 0 | 0 | Not-determined | Genome-fragment | NA | 0    | 0 |
| S16_extracted_18907       |          | 1422  | No | NA | 0 | 0 | Low-quality    | Genome-fragment | NA | 0.92 | 0 |
| S14_vx_k141_37661         | [full]   | 3308  | No | NA | 0 | 3 | Not-determined | Genome-fragment | NA | 2.66 | 0 |
| S16_extracted_32536       |          | 1422  | No | NA | 0 | 0 | Low-quality    | Genome-fragment | NA | 1.14 | 0 |
| S16_vx_59042              | [full]   | 1422  | No | NA | 0 | 0 | Low-quality    | Genome-fragment | NA | 0    | 0 |
| S14_vx_k141_58206         | [full]   | 2088  | No | NA | 0 | 1 | Not-determined | Genome-fragment | NA | 0    | 0 |
| S16_vx_129771             | [full]   | 1422  | No | NA | 1 | 0 | Low-quality    | Genome-fragment | NA | 3.46 | 0 |
| S14_vx_k141_21892         | [full]   | 1873  | No | NA | 0 | 2 | Not-determined | Genome-fragment | NA | 0    | 0 |
| S14_vx_k141_36382         | [full]   | 4637  | No | NA | 0 | 4 | Not-determined | Genome-fragment | NA | 0    | 0 |
| S10_vx_31841              | [full]   | 1422  | No | NA | 0 | 0 | Low-quality    | Genome-fragment | NA | 1.73 | 0 |
| S14_vx_k141_14074         | [full]   | 1465  | No | NA | 0 | 0 | Not-determined | Genome-fragment | NA | 0    | 0 |
| S14_vx_k141_87711         | [full]   | 2312  | No | NA | 0 | 2 | Not-determined | Genome-fragment | NA | 0    | 0 |
| S12_extracted_k141_169593 |          | 1422  | No | NA | 1 | 0 | Low-quality    | Genome-fragment | NA | 2.9  | 0 |
| S12_vx_k141_51515         | [full]   | 1422  | No | NA | 0 | 0 | Low-quality    | Genome-fragment | NA | 3.13 | 0 |
| S14_vx_k141_21935         | [full]   | 2402  | No | NA | 0 | 2 | Not-determined | Genome-fragment | NA | 0    | 0 |
| S2_extracted_k141_10568   |          | 1422  | No | NA | 2 | 0 | Low-quality    | Genome-fragment | NA | 4.67 | 0 |
| S14_extracted_k141_88323  |          | 1423  | No | NA | 0 | 0 | Low-quality    | Genome-fragment | NA | 3.87 | 0 |
| S14_vx_k141_36482         | [full]   | 1533  | No | NA | 0 | 2 | Not-determined | Genome-fragment | NA | 0    | 0 |
| S14_vx_k141_75667         | [full]   | 1423  | No | NA | 1 | 0 | Low-quality    | Genome-fragment | NA | 2.38 | 0 |
| S14_vx_k141_21978         | [full]   | 1408  | No | NA | 0 | 0 | Not-determined | Genome-fragment | NA | 3.39 | 0 |
| S14_vx_k141_11455         | [full]   | 1423  | No | NA | 0 | 0 | Low-quality    | Genome-fragment | NA | 2.39 | 0 |
| S14_vx_k141_117106        | [full]   | 1089  | No | NA | 0 | 1 | Not-determined | Genome-fragment | NA | 0    | 0 |
| S11_extracted_k141_22986  |          | 1423  | No | NA | 1 | 0 | Low-quality    | Genome-fragment | NA | 1.47 | 0 |
| S5_extracted_k141_50035   |          | 1423  | No | NA | 0 | 0 | Low-quality    | Genome-fragment | NA | 2.13 | 0 |
| S5_vx_k141_81489          | [H2gene] | 1423  | No | NA | 1 | 0 | Low-quality    | Genome-fragment | NA | 0.88 | 0 |
| S7_extracted_62238        |          | 1423  | No | NA | 3 | 0 | Low-quality    | Genome-fragment | NA | 6.49 | 0 |
| S7_vx_42294               | [full]   | 1423  | No | NA | 0 | 0 | Low-quality    | Genome-fragment | NA | 3.81 | 0 |
| S14_vx_k141_6981          | [full]   | 9629  | No | NA | 0 | 4 | Not-determined | Genome-fragment | NA | 0    | 0 |
| S16_vx_5293               | [full]   | 1423  | No | NA | 0 | 0 | Low-quality    | Genome-fragment | NA | 3.79 | 0 |
| S16_vx_115968             | [full]   | 1423  | No | NA | 0 | 0 | Low-quality    | Genome-fragment | NA | 3.07 | 0 |
| S14_vx_k141_65232         | [full]   | 1570  | No | NA | 0 | 0 | Not-determined | Genome-fragment | NA | 0    | 0 |
| S14_vx_k141_65248         | [full]   | 2434  | No | NA | 0 | 0 | Not-determined | Genome-fragment | NA | 0    | 0 |
| S14_vx_k141_58376         | [full]   | 1425  | No | NA | 0 | 2 | Not-determined | Genome-fragment | NA | 0    | 0 |
| S14_vx_k141_87627         | [full]   | 1072  | No | NA | 1 | 0 | Not-determined | Genome-fragment | NA | 0    | 0 |
| S14_vx_k141_80342         | [full]   | 2389  | No | NA | 0 | 2 | Not-determined | Genome-fragment | NA | 0    | 0 |
| S8_vx_k141_180752         | [full]   | 1423  | No | NA | 0 | 0 | Low-quality    | Genome-fragment | NA | 4.93 | 0 |
| S14_vx_k141_80362         | [full]   | 2241  | No | NA | 0 | 2 | Not-determined | Genome-fragment | NA | 0    | 0 |
| S14_vx_k141_58392         | [full]   | 1151  | No | NA | 0 | 0 | Not-determined | Genome-fragment | NA | 0    | 0 |
| S8_vx_k141_195028         | [H2gene] | 1423  | No | NA | 1 | 0 | Low-quality    | Genome-fragment | NA | 3.14 | 0 |
| S17_vx_k141_155672        | [full]   | 1424  | No | NA | 0 | 0 | Low-quality    | Genome-fragment | NA | 1.52 | 0 |
| S17_vx_k141_117735        | [full]   | 1424  | No | NA | 0 | 0 | Low-quality    | Genome-fragment | NA | 3.88 | 0 |
| S13_vx_87153              | [full]   | 1424  | No | NA | 0 | 0 | Low-quality    | Genome-fragment | NA | 1.51 | 0 |
| S14_vx_k141_36632         | [full]   | 4294  | No | NA | 0 | 1 | Not-determined | Genome-fragment | NA | 0    | 0 |
| S14_vx_k141_50531         | [full]   | 1023  | No | NA | 0 | 0 | Not-determined | Genome-fragment | NA | 0    | 0 |
| S14_vx_k141_102181        | [full]   | 1086  | No | NA | 0 | 0 | Not-determined | Genome-fragment | NA | 0    | 0 |
| S14_vx_k141_21980         | [full]   | 1424  | No | NA | 0 | 0 | Low-quality    | Genome-fragment | NA | 3.03 | 0 |
| S14_vx_k141_14355         | [full]   | 1911  | No | NA | 0 | 2 | Not-determined | Genome-fragment | NA | 0    | 0 |
| S14_vx_k141_7109          | [full]   | 3087  | No | NA | 0 | 2 | Not-determined | Genome-fragment | NA | 0    | 0 |
| S11_extracted_k141_4241   |          | 1424  | No | NA | 1 | 0 | Low-quality    | Genome-fragment | NA | 1.98 | 0 |
| S14_vx_k141_50587         | [full]   | 1156  | No | NA | 0 | 0 | Not-determined | Genome-fragment | NA | 0    | 0 |
| S14_vx_k141_80435         | [full]   | 2354  | No | NA | 0 | 1 | Not-determined | Genome-fragment | NA | 0    | 0 |
| S1_vx_k141_68338          | [full]   | 1424  | No | NA | 2 | 0 | Low-quality    | Genome-fragment | NA | 1.79 | 0 |
| S1_vx_k141_96483          | [full]   | 1424  | No | NA | 1 | 0 | Low-quality    | Genome-fragment | NA | 3.37 | 0 |
| S14_vx_k141_58459         | [full]   | 7263  | No | NA | 0 | 2 | Not-determined | Genome-fragment | NA | 0    | 0 |
| S14_vx_k141_80431         | [full]   | 6489  | No | NA | 0 | 3 | Not-determined | Genome-fragment | NA | 0    | 0 |
| S14_vx_k141_14403         | [full]   | 1488  | No | NA | 0 | 0 | Not-determined | Genome-fragment | NA | 0    | 0 |
| S1_vx_k141_151943         | [full]   | 1424  | No | NA | 0 | 1 | Low-quality    | Genome-fragment | NA | 1.02 | 0 |
| S14_vx_k141_7200          | [full]   | 1013  | No | NA | 0 | 1 | Not-determined | Genome-fragment | NA | 0    | 0 |
| S3_vx_k141_19344          | [full]   | 1424  | No | NA | 1 | 0 | Low-quality    | Genome-fragment | NA | 2.53 | 0 |
| S14_vx_k141_102300        | [full]   | 1063  | No | NA | 0 | 1 | Not-determined | Genome-fragment | NA | 0    | 0 |
| S3_vx_k141_10785          | [full]   | 1424  | No | NA | 0 | 0 | Low-quality    | Genome-fragment | NA | 3.21 | 0 |
| S14_vx_k141_73014         | [full]   | 4861  | No | NA | 0 | 2 | Not-determined | Genome-fragment | NA | 0    | 0 |
| S14_vx_k141_80468         | [full]   | 1627  | No | NA | 0 | 0 | Not-determined | Genome-fragment | NA | 0    | 0 |
| S14_vx_k141_73040         | [full]   | 2739  | No | NA | 0 | 0 | Not-determined | Genome-fragment | NA | 0    | 0 |
| S14_vx_k141_7229          | [full]   | 8865  | No | NA | 0 | 3 | Not-determined | Genome-fragment | NA | 0    | 0 |
| S14_vx_k141_7242          | [full]   | 3085  | No | NA | 0 | 1 | Not-determined | Genome-fragment | NA | 0    | 0 |
| S7_extracted_76059        |          | 1424  | No | NA | 0 | 0 | Low-quality    | Genome-fragment | NA | 3.06 | 0 |
| S14_vx_k141_65452         | [full]   | 5696  | No | NA | 0 | 4 | Not-determined | Genome-fragment | NA | 0    | 0 |
| S7_vx_117621              | [full]   | 1424  | No | NA | 2 | 0 | Low-quality    | Genome-fragment | NA | 4.57 | 0 |
| S16_vx_05051              | [full]   | 1424  | No | NA | 1 | 0 | Low-quality    | Genome-fragment | NA | 2.84 | 0 |
| S14_vx_k141_28727         | [full]   | 1551  | No | NA | 0 | 3 | Not-determined | Genome-fragment | NA | 0    | 0 |
| S14_vx_k141_73106         | [full]   | 1466  | No | NA | 0 | 0 | Not-determined | Genome-fragment | NA | 0    | 0 |
| S14_vx_k141_65483         | [full]   | 1939  | No | NA | 0 | 0 | Not-determined | Genome-fragment | NA | 0    | 0 |
| S14_vx_k141_14468         | [full]   | 1884  | No | NA | 0 | 0 | Not-determined | Genome-fragment | NA | 0    | 0 |
| S14_vx_k141_73126         | [full]   | 6496  | No | NA | 0 | 5 | Not-determined | Genome-fragment | NA | 0    | 0 |
| S14_vx_k141_80588         | [full]   | 1012  | No | NA | 0 | 2 | Not-determined | Genome-fragment | NA | 0    | 0 |
| S14_vx_k141_73214         | [full]   | 2863  | No | NA | 0 | 0 | Not-determined | Genome-fragment | NA | 0    | 0 |
| S16_vx_60737              | [full]   | 1424  | No | NA | 1 | 0 | Low-quality    | Genome-fragment | NA | 1.7  | 0 |
| S14_vx_k141_50825         | [full]   | 1938  | No | NA | 0 | 0 | Not-determined | Genome-fragment | NA | 0    | 0 |
| S16_vx_53409              | [full]   | 1424  | No | NA | 0 | 0 | Low-quality    | Genome-fragment | NA | 3.52 | 0 |
| S13_vx_17205              | [full]   | 1425  | No | NA | 2 | 0 | Low-quality    | Genome-fragment | NA | 2.03 | 0 |
| S14_vx_k141_65541         | [full]   | 2930  | No | NA | 0 | 1 | Not-determined | Genome-fragment | NA | 0    | 0 |
| S14_extracted_k141_39426  |          | 1425  | No | NA | 1 | 0 | Low-quality    | Genome-fragment | NA | 3.19 | 0 |
| S14_vx_k141_73551         | [full]   | 2802  | No | NA | 0 | 1 | Not-determined | Genome-fragment | NA | 0    | 0 |
| S3_vx_k141_123094         | [full]   | 1425  | No | NA | 0 | 0 | Low-quality    | Genome-fragment | NA | 2.69 | 0 |
| S14_vx_k141_65561         | [full]   | 2077  | No | NA | 0 | 0 | Not-determined | Genome-fragment | NA | 0    | 0 |
| S14_vx_k141_50896         | [full]   | 2163  | No | NA | 0 | 2 | Not-determined | Genome-fragment | NA | 0    | 0 |
| S5_extracted_k141_110720  |          | 1425  | No | NA | 0 | 1 | Low-quality    | Genome-fragment | NA | 0.36 | 0 |
| S14_vx_k141_65616         | [full]   | 3895  | No | NA | 0 | 4 | Not-determined | Genome-fragment | NA | 0    | 0 |
| S14_vx_k141_29664         | [full]   | 3316  |    |    |   |   |                |                 |    |      |   |



|                           |      |     |    |   |   |                |                 |       |       |
|---------------------------|------|-----|----|---|---|----------------|-----------------|-------|-------|
| 58_vs_k141_66755 full     | 1428 | No  | NA | 0 | 0 | Low-quality    | Genome-fragment | 2.6   | 0     |
| 59_vs_k141_44652 full     | 1429 | Yes |    | 1 | 1 | Low-quality    | Genome-fragment | 0.3   | 73.48 |
| 53_vs_k141_3913 full      | 1429 | No  | NA | 0 | 0 | Low-quality    | Genome-fragment | 0.95  | 0     |
| 53_vs_k141_109214 H2gene  | 1429 | No  | NA | 1 | 0 | Low-quality    | Genome-fragment | 3.62  | 0     |
| 57_extracted_33677        | 1429 | No  | NA | 1 | 0 | Low-quality    | Genome-fragment | 6.53  | 0     |
| 57_extracted_102255       | 1429 | No  | NA | 0 | 0 | Low-quality    | Genome-fragment | 4.67  | 0     |
| 57_vs_k83346 full         | 1429 | No  | NA | 2 | 0 | Low-quality    | Genome-fragment | 3.11  | 0     |
| 512_vs_k141_24543 full    | 1429 | No  | NA | 0 | 2 | Low-quality    | Genome-fragment | 0.75  | 0     |
| 517_extracted_k141_165705 | 1430 | No  | NA | 1 | 1 | Low-quality    | Genome-fragment | 1.01  | 0     |
| 59_vs_k141_54614 full     | 1430 | No  | NA | 2 | 0 | Low-quality    | Genome-fragment | 3.34  | 0     |
| 514_extracted_k141_88566  | 1430 | No  | NA | 0 | 0 | Low-quality    | Genome-fragment | 5.32  | 0     |
| 53_vs_k141_3899 full      | 1430 | No  | NA | 0 | 0 | Low-quality    | Genome-fragment | 1     | 0     |
| 514_vs_k141_67210 H2gene  | 1339 | No  | NA | 0 | 0 | Not-determined | Genome-fragment | NA    | 0     |
| 53_vs_k141_125568 full    | 1430 | No  | NA | 0 | 0 | Low-quality    | Genome-fragment | 1.6   | 0     |
| 57_vs_35202 full          | 1430 | No  | NA | 0 | 0 | Low-quality    | Genome-fragment | 3.43  | 0     |
| 516_extracted_22925       | 1430 | No  | NA | 3 | 0 | Low-quality    | Genome-fragment | 3.76  | 0     |
| 516_extracted_170909      | 1430 | No  | NA | 0 | 0 | Low-quality    | Genome-fragment | 3     | 0     |
| 514_vs_k141_67707 H2gene  | 4712 | No  | NA | 0 | 0 | Not-determined | Genome-fragment | NA    | 0     |
| 516_vs_50084 full         | 1430 | No  | NA | 0 | 1 | Low-quality    | Genome-fragment | 0.8   | 0     |
| 510_extracted_46177       | 1430 | No  | NA | 0 | 0 | Low-quality    | Genome-fragment | 2.59  | 0     |
| 512_extracted_k141_161796 | 1430 | No  | NA | 0 | 1 | Low-quality    | Genome-fragment | 0.68  | 0     |
| 515_vs_3527 full          | 1430 | No  | NA | 1 | 0 | Low-quality    | Genome-fragment | 1.8   | 0     |
| 59_vs_k141_67241 full     | 1431 | No  | NA | 1 | 0 | Low-quality    | Genome-fragment | 3.05  | 0     |
| 511_vs_k141_101665 H2gene | 1431 | No  | NA | 1 | 0 | Low-quality    | Genome-fragment | 0.99  | 0     |
| 513_vs_144639 full        | 1431 | No  | NA | 0 | 0 | Low-quality    | Genome-fragment | 3.41  | 0     |
| 514_vs_k141_112103 full   | 1431 | No  | NA | 3 | 0 | Low-quality    | Genome-fragment | 4.73  | 0     |
| 514_vs_k141_18114 full    | 1431 | No  | NA | 0 | 0 | Low-quality    | Genome-fragment | 2.53  | 0     |
| 51_vs_k141_79379 H2gene   | 1431 | No  | NA | 1 | 0 | Low-quality    | Genome-fragment | 2.3   | 0     |
| 55_vs_k141_7718 full      | 1431 | No  | NA | 0 | 0 | Low-quality    | Genome-fragment | 2.84  | 0     |
| 57_vs_118718 full         | 1431 | No  | NA | 1 | 0 | Low-quality    | Genome-fragment | 3.7   | 0     |
| 57_vs_123161 full         | 1431 | No  | NA | 0 | 0 | Low-quality    | Genome-fragment | 3.51  | 0     |
| 516_extracted_22274       | 1431 | No  | NA | 0 | 0 | Low-quality    | Genome-fragment | 3.08  | 0     |
| 516_vs_50761 full         | 1431 | No  | NA | 2 | 0 | Low-quality    | Genome-fragment | 3.27  | 0     |
| 58_vs_k141_74813 full     | 1431 | No  | NA | 0 | 0 | Low-quality    | Genome-fragment | 1.67  | 0     |
| 514_extracted_k141_36625  | 1432 | No  | NA | 0 | 0 | Low-quality    | Genome-fragment | 1.35  | 0     |
| 55_vs_k141_8337 full      | 1432 | No  | NA | 0 | 0 | Low-quality    | Genome-fragment | 1.2   | 0     |
| 55_vs_k141_107406 full    | 1432 | No  | NA | 0 | 0 | Low-quality    | Genome-fragment | 2.8   | 0     |
| 57_vs_82404 full          | 1432 | No  | NA | 0 | 0 | Low-quality    | Genome-fragment | 0.98  | 0     |
| 516_extracted_101237      | 1432 | No  | NA | 0 | 1 | Low-quality    | Genome-fragment | 2.89  | 0     |
| 516_extracted_158794      | 1432 | No  | NA | 0 | 0 | Low-quality    | Genome-fragment | 2.42  | 0     |
| 512_vs_k141_7130 full     | 1432 | No  | NA | 1 | 0 | Low-quality    | Genome-fragment | 2.03  | 0     |
| 54_extracted_16200        | 1432 | No  | NA | 0 | 0 | Low-quality    | Genome-fragment | 4.67  | 0     |
| 59_extracted_k141_66054   | 1433 | No  | NA | 0 | 0 | Low-quality    | Genome-fragment | 2.84  | 0     |
| 513_vs_141576 full        | 1433 | No  | NA | 0 | 0 | Low-quality    | Genome-fragment | 3.65  | 0     |
| 512_vs_k141_7718 full     | 1433 | Yes |    | 1 | 1 | Low-quality    | Genome-fragment | 2.3   | 37.33 |
| 53_vs_k141_107948 full    | 1433 | No  | NA | 2 | 0 | Low-quality    | Genome-fragment | 1.2   | 0     |
| 55_vs_k141_78086 full     | 1433 | No  | NA | 0 | 0 | Low-quality    | Genome-fragment | 2.53  | 0     |
| 516_extracted_13418       | 1433 | No  | NA | 2 | 0 | Low-quality    | Genome-fragment | 4.45  | 0     |
| 54_extracted_21280        | 1433 | No  | NA | 5 | 0 | Low-quality    | Genome-fragment | 4.71  | 0     |
| 58_vs_k141_60079 full     | 1433 | No  | NA | 0 | 1 | Low-quality    | Genome-fragment | 0.37  | 0     |
| 517_extracted_k141_123675 | 1434 | No  | NA | 1 | 0 | Low-quality    | Genome-fragment | 3.91  | 0     |
| 55_extracted_k141_94703   | 1434 | No  | NA | 1 | 0 | Low-quality    | Genome-fragment | 1.71  | 0     |
| 55_vs_k141_83416 H2gene   | 1434 | No  | NA | 1 | 0 | Low-quality    | Genome-fragment | 3.94  | 0     |
| 57_vs_38725 full          | 1434 | No  | NA | 1 | 0 | Low-quality    | Genome-fragment | 0.79  | 0     |
| 512_vs_k141_49045 full    | 1434 | No  | NA | 0 | 0 | Low-quality    | Genome-fragment | 2.73  | 0     |
| 55_vs_59441 full          | 1434 | No  | NA | 0 | 2 | Low-quality    | Genome-fragment | 4.58  | 0     |
| 517_vs_k141_89251 full    | 1435 | No  | NA | 0 | 1 | Low-quality    | Genome-fragment | 0.83  | 0     |
| 514_vs_k141_26461 H2gene  | 1200 | No  | NA | 0 | 0 | Not-determined | Genome-fragment | NA    | 0     |
| 51_vs_k141_7051 full      | 1435 | No  | NA | 0 | 0 | Low-quality    | Genome-fragment | 4.12  | 0     |
| 53_extracted_k141_42343   | 1435 | No  | NA | 1 | 0 | Low-quality    | Genome-fragment | 0.76  | 0     |
| 514_vs_k141_63534 H2gene  | 2038 | No  | NA | 0 | 0 | Not-determined | Genome-fragment | NA    | 0     |
| 57_vs_115992 full         | 1435 | No  | NA | 0 | 0 | Low-quality    | Genome-fragment | 0.9   | 0     |
| 516_vs_9176 full          | 1435 | No  | NA | 0 | 0 | Low-quality    | Genome-fragment | 1.83  | 0     |
| 516_vs_156424 full        | 1435 | No  | NA | 0 | 1 | Low-quality    | Genome-fragment | 0.94  | 0     |
| 510_extracted_92748       | 1435 | No  | NA | 0 | 1 | Low-quality    | Genome-fragment | 0.16  | 0     |
| 58_vs_k141_104667 full    | 1435 | No  | NA | 0 | 0 | Low-quality    | Genome-fragment | 2.56  | 0     |
| 517_vs_k141_1478 full     | 1436 | No  | NA | 2 | 0 | Low-quality    | Genome-fragment | 3.29  | 0     |
| 513_vs_5704 full          | 1436 | No  | NA | 0 | 0 | Low-quality    | Genome-fragment | 3.33  | 0     |
| 514_extracted_k141_98245  | 1436 | No  | NA | 0 | 0 | Low-quality    | Genome-fragment | 4.63  | 0     |
| 514_vs_k141_20441 H2gene  | 1178 | No  | NA | 0 | 0 | Not-determined | Genome-fragment | NA    | 0     |
| 51_vs_k141_144510 full    | 1436 | No  | NA | 0 | 1 | Low-quality    | Genome-fragment | 0.74  | 0     |
| 514_vs_k141_64191 H2gene  | 1154 | No  | NA | 0 | 0 | Not-determined | Genome-fragment | NA    | 0     |
| 51_vs_k141_150907 full    | 1436 | No  | NA | 2 | 0 | Low-quality    | Genome-fragment | 5.22  | 0     |
| 53_vs_k141_108237 full    | 1436 | No  | NA | 0 | 0 | Low-quality    | Genome-fragment | 2.85  | 0     |
| 55_vs_k141_12329 full     | 1436 | No  | NA | 0 | 0 | Low-quality    | Genome-fragment | 3.01  | 0     |
| 516_vs_121940 H2gene      | 1436 | No  | NA | 1 | 0 | Low-quality    | Genome-fragment | 3.76  | 0     |
| 510_vs_43817 full         | 1436 | No  | NA | 0 | 1 | Low-quality    | Genome-fragment | 0.7   | 0     |
| 512_extracted_k141_161887 | 1436 | No  | NA | 0 | 0 | Low-quality    | Genome-fragment | 3.61  | 0     |
| 512_vs_k141_109500 full   | 1436 | No  | NA | 0 | 0 | Low-quality    | Genome-fragment | 3.11  | 0     |
| 515_extracted_44337       | 1436 | No  | NA | 0 | 1 | Low-quality    | Genome-fragment | 2.43  | 0     |
| 56_vs_k141_4303 full      | 1436 | No  | NA | 0 | 0 | Low-quality    | Genome-fragment | 1.95  | 0     |
| 58_vs_k141_200461 full    | 1436 | No  | NA | 1 | 0 | Low-quality    | Genome-fragment | 1.24  | 0     |
| 511_vs_k141_35988 full    | 1437 | No  | NA | 2 | 0 | Low-quality    | Genome-fragment | 2.02  | 0     |
| 514_vs_k141_36244 H2gene  | 1025 | No  | NA | 0 | 0 | Not-determined | Genome-fragment | NA    | 0     |
| 514_vs_k141_111025 full   | 1437 | No  | NA | 0 | 0 | Low-quality    | Genome-fragment | 3.37  | 0     |
| 51_extracted_k141_191922  | 1437 | No  | NA | 0 | 0 | Low-quality    | Genome-fragment | 1.47  | 0     |
| 51_vs_k141_148884 full    | 1437 | No  | NA | 2 | 0 | Low-quality    | Genome-fragment | 3.38  | 0     |
| 514_vs_k141_14458 H2gene  | 1943 | No  | NA | 0 | 0 | Not-determined | Genome-fragment | NA    | 0     |
| 53_vs_k141_6351 full      | 1437 | No  | NA | 2 | 0 | Low-quality    | Genome-fragment | 3.38  | 0     |
| 55_extracted_k141_123207  | 1437 | No  | NA | 2 | 0 | Low-quality    | Genome-fragment | 3.92  | 0     |
| 51_extracted_k141_46726   | 1126 | No  | NA | 0 | 1 | Not-determined | Genome-fragment | NA    | 0     |
| 51_extracted_k141_15352   | 1268 | No  | NA | 0 | 0 | Not-determined | Genome-fragment | NA    | 0     |
| 51_extracted_k141_106803  | 1128 | No  | NA | 0 | 0 | Not-determined | Genome-fragment | NA    | 0     |
| 51_extracted_k141_26703   | 1267 | No  | NA | 0 | 0 | Not-determined | Genome-fragment | NA    | 0     |
| 51_extracted_k141_53406   | 1236 | No  | NA | 0 | 2 | Not-determined | Genome-fragment | NA    | 0     |
| 51_extracted_k141_46732   | 1166 | No  | NA | 0 | 2 | Not-determined | Genome-fragment | NA    | 0     |
| 55_vs_k141_101072 full    | 1437 | No  | NA | 2 | 0 | Low-quality    | Genome-fragment | 7.43  | 0     |
| 51_extracted_k141_136830  | 4924 | No  | NA | 0 | 0 | Not-determined | Genome-fragment | NA    | 0     |
| 51_extracted_k141_11351   | 1100 | No  | NA | 0 | 0 | Not-determined | Genome-fragment | NA    | 0     |
| 516_vs_125793 full        | 1437 | No  | NA | 0 | 2 | Low-quality    | Genome-fragment | 2.14  | 0     |
| 517_vs_k141_154783 full   | 1438 | No  | NA | 0 | 0 | Low-quality    | Genome-fragment | 3.52  | 0     |
| 51_extracted_k141_6099    | 3514 | No  | NA | 0 | 2 | Not-determined | Genome-fragment | NA    | 0     |
| 51_extracted_k141_33400   | 1206 | No  | NA | 0 | 1 | Not-determined | Genome-fragment | NA    | 0     |
| 51_extracted_k141_113502  | 1205 | No  | NA | 0 | 2 | Not-determined | Genome-fragment | NA    | 0     |
| 59_vs_k141_89728 full     | 1438 | No  | NA | 0 | 0 | Low-quality    | Genome-fragment | 1.81  | 0     |
| 511_extracted_k141_18373  | 1438 | No  | NA | 1 | 0 | Low-quality    | Genome-fragment | 3.4   | 0     |
| 51_extracted_k141_20067   | 1292 | No  | NA | 0 | 0 | Not-determined | Genome-fragment | NA    | 0     |
| 511_vs_k141_92299 full    | 1438 | No  | NA | 1 | 0 | Low-quality    | Genome-fragment | 3.16  | 0     |
| 51_extracted_k141_11382   | 1600 | No  | NA | 0 | 1 | Not-determined | Genome-fragment | NA    | 0     |
| 51_extracted_k141_13401   | 1087 | No  | NA | 0 | 1 | Not-determined | Genome-fragment | NA    | 0     |
| 514_vs_k141_30643 H2gene  | 1438 | No  | NA | 1 | 0 | Low-quality    | Genome-fragment | 3.06  | 0     |
| 53_extracted_k141_114656  | 1438 | No  | NA | 3 | 0 | Low-quality    | Genome-fragment | 24.5  | 0     |
| 51_extracted_k141_140259  | 2466 | No  | NA | 3 | 0 | Medium-quality | Genome-fragment | 51.91 | 0     |
| 51_extracted_k141_26760   | 2324 | No  | NA | 0 | 0 | Not-determined | Genome-fragment | NA    | 0     |
| 51_extracted_k141_46821   | 2387 | No  | NA | 0 | 0 | Not-determined | Genome-fragment | NA    | 0     |
| 51_extracted_k141_100203  | 1384 | No  | NA | 0 | 1 | Not-determined | Genome-fragment | NA    | 0     |
| 51_extracted_k141_120258  | 1322 | No  | NA | 0 | 0 | Not-determined | Genome-fragment | NA    | 0     |
| 51_extracted_k141_106910  | 1012 | No  | NA | 0 | 1 | Not-determined | Genome-fragment | NA    | 0     |
| 51_extracted_k141_100211  | 1666 | No  | NA | 0 | 0 | Not-determined | Genome-fragment | NA    | 0     |
| 51_extracted_k141_126961  | 1264 | No  | NA | 0 | 0 | Not-determined | Genome-fragment | NA    | 0     |
| 55_extracted_k141_67375   | 1438 | No  | NA | 2 | 0 | Low-quality    | Genome-fragment | 4.23  | 0     |
| 55_extracted_k141_155487  | 1438 | No  | NA | 0 | 0 | Low-quality    | Genome-fragment | 2.34  | 0     |
| 55_vs_k141_73680 full     | 1438 | No  | NA | 0 | 2 | Low-quality    | Genome-fragment | 3.69  | 0     |
| 516_extracted_62706       | 1438 | No  | NA | 2 | 0 | Low-quality    | Genome-fragment | 3.17  | 0     |
| 51_extracted_k141_73557   | 1300 | No  | NA | 2 | 0 | Not-determined | Genome-fragment | NA    | 0     |
| 51_extracted_k141_106936  | 1527 | No  | NA | 0 | 1 | Not-determined | Genome-fragment | NA    | 0     |
| 51_extracted_k141_73570   | 3091 | No  | NA | 0 | 1 | Not-determined | Genome-fragment | NA    | 0     |
| 51_extracted_k141_73579   | 4803 | No  | NA | 0 | 0 | Not-determined | Genome-fragment | NA    | 0     |
| 51_extracted_k141_127028  | 3209 | No  | NA | 0 | 2 | Not-determined | Genome-fragment | NA    | 0     |
| 51_extracted_k141_100291  | 1023 | No  | NA | 0 | 1 | Not-determined | Genome-fragment | NA    | 0     |
| 51_extracted_k141_11542   | 2462 | No  | NA | 0 | 2 | Not-determined | Genome-fragment | NA    | 0     |
| 516_extracted_89128       | 1438 | No  | NA | 0 | 0 | Low-quality    | Genome-fragment | 1.76  | 0     |
| 516_vs_18571 full         | 1438 | No  | NA | 0 | 0 | Low-quality    | Genome-fragment | 1.97  | 0     |
| 516_vs_39567 full         | 1438 | No  | NA | 1 | 0 | Low-quality    | Genome-fragment | 2.63  | 0     |
| 51_extracted_k141_61861   | 1439 | No  | NA | 0 | 1 | Low-quality    | Genome-fragment | 2.99  | 0     |
| 51_extracted_k141_20241   | 4076 | No  | NA | 0 | 4 | Not-determined | Genome-fragment | NA    | 0     |
| 51_extracted_k141_73636   | 1206 | No  | NA | 0 | 0 | Not-determined | Genome-fragment | NA    | 0     |
| 511_vs_k141_97274 full    | 1439 | No  | NA | 0 | 0 | Low-quality    | Genome-fragment | 3.32  | 0     |
| 514_extracted_k141_44110  | 1439 | No  | NA | 4 | 0 | Low-quality    | Genome-fragment | 4.74  | 0     |
| 51_extracted_k141_140439  | 2130 | No  | NA | 0 | 1 | Not-determined | Genome-fragment | NA    | 0     |
| 514_extracted_k141_53168  | 1439 | No  | NA | 3 | 0 | Low-quality    | Genome-fragment | 4.75  | 0     |
| 51_extracted_k141_120460  | 1092 | No  | NA | 0 | 0 | Not-determined | Genome-fragment | NA    | 0     |
| 51_extracted_k141_113725  | 2410 | No  | NA |   |   |                |                 |       |       |



|                            |      |    |    |   |   |                |                 |    |      |   |
|----------------------------|------|----|----|---|---|----------------|-----------------|----|------|---|
| S1_extracted_k141_20439    | 1073 | No | NA | 0 | 0 | Not-determined | Genome-fragment | NA |      | 0 |
| S11_vs_k141_30699  full    | 1440 | No | NA | 0 | 0 | Low-quality    | Genome-fragment | NA | 2.88 | 0 |
| S1_extracted_k141_40502    | 1047 | No | NA | 0 | 0 | Not-determined | Genome-fragment | NA |      | 0 |
| S13_extracted_k141_147113  | 1440 | No | NA | 0 | 0 | Low-quality    | Genome-fragment | NA | 3.25 | 0 |
| S1_extracted_k141_87219    | 2129 | No | NA | 0 | 1 | Not-determined | Genome-fragment | NA |      | 0 |
| S1_extracted_k141_40512    | 1102 | No | NA | 0 | 1 | Not-determined | Genome-fragment | NA |      | 0 |
| S13_vs_k141_33845  full    | 1440 | No | NA | 1 | 0 | Low-quality    | Genome-fragment | NA | 2.96 | 0 |
| S1_extracted_k141_100568   | 1121 | No | NA | 0 | 0 | Not-determined | Genome-fragment | NA |      | 0 |
| S13_extracted_k141_56162   | 1440 | No | NA | 0 | 1 | Low-quality    | Genome-fragment | NA | 0.16 | 0 |
| S1_extracted_k141_33757    | 4440 | No | NA | 0 | 2 | Not-determined | Genome-fragment | NA |      | 0 |
| S1_extracted_k141_40537    | 1021 | No | NA | 0 | 2 | Not-determined | Genome-fragment | NA |      | 0 |
| S1_extracted_k141_140595   | 1393 | No | NA | 0 | 1 | Not-determined | Genome-fragment | NA |      | 0 |
| S5_vs_k141_82749  full     | 1440 | No | NA | 1 | 0 | Low-quality    | Genome-fragment | NA | 3.79 | 0 |
| S1_extracted_k141_93964    | 3190 | No | NA | 0 | 2 | Not-determined | Genome-fragment | NA |      | 0 |
| S1_extracted_k141_13880    | 1332 | No | NA | 0 | 1 | Not-determined | Genome-fragment | NA |      | 0 |
| S1_extracted_k141_100617   | 1129 | No | NA | 0 | 1 | Not-determined | Genome-fragment | NA |      | 0 |
| S1_extracted_k141_100634   | 1236 | No | NA | 0 | 0 | Not-determined | Genome-fragment | NA |      | 0 |
| S7_vs_19766  full          | 1440 | No | NA | 0 | 1 | Low-quality    | Genome-fragment | NA | 3.95 | 0 |
| S1_extracted_k141_80655    | 2049 | No | NA | 0 | 2 | Not-determined | Genome-fragment | NA |      | 0 |
| S7_vs_77869  full          | 1440 | No | NA | 0 | 0 | Low-quality    | Genome-fragment | NA | 1    | 0 |
| S7_vs_108708  full         | 1440 | No | NA | 0 | 0 | Low-quality    | Genome-fragment | NA | 6.05 | 0 |
| S1_extracted_k141_33823    | 1533 | No | NA | 0 | 1 | Not-determined | Genome-fragment | NA |      | 0 |
| S1_extracted_k141_47209    | 1311 | No | NA | 0 | 0 | Not-determined | Genome-fragment | NA |      | 0 |
| S1_extracted_k141_47213    | 1006 | No | NA | 0 | 1 | Not-determined | Genome-fragment | NA |      | 0 |
| S10_extracted_k141_82450   | 1440 | No | NA | 1 | 0 | Low-quality    | Genome-fragment | NA | 0.87 | 0 |
| S10_vs_4550  full          | 1440 | No | NA | 0 | 0 | Low-quality    | Genome-fragment | NA | 3.19 | 0 |
| S1_extracted_k141_140687   | 1392 | No | NA | 0 | 1 | Not-determined | Genome-fragment | NA |      | 0 |
| S1_extracted_k141_127382   | 2424 | No | NA | 0 | 0 | Not-determined | Genome-fragment | NA |      | 0 |
| S1_extracted_k141_87334    | 1098 | No | NA | 0 | 0 | Not-determined | Genome-fragment | NA |      | 0 |
| S1_extracted_k141_27179    | 1576 | No | NA | 0 | 1 | Not-determined | Genome-fragment | NA |      | 0 |
| S1_extracted_k141_153805   | 1098 | No | NA | 0 | 1 | Not-determined | Genome-fragment | NA |      | 0 |
| S1_extracted_k141_47235    | 1769 | No | NA | 0 | 1 | Not-determined | Genome-fragment | NA |      | 0 |
| S17_extracted_k141_36973   | 1441 | No | NA | 0 | 0 | Low-quality    | Genome-fragment | NA | 1.63 | 0 |
| S17_extracted_k141_102814  | 1441 | No | NA | 2 | 0 | Low-quality    | Genome-fragment | NA | 3.89 | 0 |
| S1_extracted_k141_515      | 1306 | No | NA | 0 | 0 | Not-determined | Genome-fragment | NA |      | 0 |
| S1_extracted_k141_67265    | 3116 | No | NA | 0 | 1 | Not-determined | Genome-fragment | NA |      | 0 |
| S1_extracted_k141_120721   | 1518 | No | NA | 0 | 1 | Not-determined | Genome-fragment | NA |      | 0 |
| S1_extracted_k141_153849   | 2877 | No | NA | 0 | 3 | Not-determined | Genome-fragment | NA |      | 0 |
| S9_vs_k141_10073  full     | 1441 | No | NA | 0 | 0 | Low-quality    | Genome-fragment | NA | 0.94 | 0 |
| S1_extracted_k141_54075    | 1032 | No | NA | 0 | 1 | Not-determined | Genome-fragment | NA |      | 0 |
| S9_vs_k141_90644  l22gene  | 1441 | No | NA | 1 | 0 | Low-quality    | Genome-fragment | NA | 4.19 | 0 |
| S1_extracted_k141_50393    | 2924 | No | NA | 1 | 1 | Not-determined | Genome-fragment | NA |      | 0 |
| S1_extracted_k141_100782   | 1753 | No | NA | 0 | 2 | Not-determined | Genome-fragment | NA |      | 0 |
| S1_vs_k141_21174  full     | 1441 | No | NA | 0 | 0 | Low-quality    | Genome-fragment | NA | 2.74 | 0 |
| S1_extracted_k141_114808   | 1659 | No | NA | 0 | 0 | Not-determined | Genome-fragment | NA |      | 0 |
| S1_extracted_k141_27307    | 1008 | No | NA | 0 | 0 | Not-determined | Genome-fragment | NA |      | 0 |
| S1_extracted_k141_120788   | 3346 | No | NA | 0 | 1 | Not-determined | Genome-fragment | NA |      | 0 |
| S1_extracted_k141_592      | 1152 | No | NA | 0 | 1 | Not-determined | Genome-fragment | NA |      | 0 |
| S1_extracted_k141_87453    | 4621 | No | NA | 0 | 1 | Not-determined | Genome-fragment | NA |      | 0 |
| S1_vs_k141_138616  full    | 1441 | No | NA | 2 | 0 | Low-quality    | Genome-fragment | NA | 3.64 | 0 |
| S1_vs_k141_123842  full    | 1441 | No | NA | 1 | 0 | Low-quality    | Genome-fragment | NA | 3.26 | 0 |
| S1_extracted_k141_107380   | 1077 | No | NA | 1 | 1 | Not-determined | Genome-fragment | NA | 2.14 | 0 |
| S5_vs_k141_18561  full     | 1441 | No | NA | 1 | 0 | Low-quality    | Genome-fragment | NA |      | 0 |
| S5_vs_k141_83482  full     | 1441 | No | NA | 2 | 0 | Low-quality    | Genome-fragment | NA | 3.25 | 0 |
| S7_vs_64181  full          | 1441 | No | NA | 2 | 0 | Low-quality    | Genome-fragment | NA | 3.25 | 0 |
| S7_vs_70569  full          | 1441 | No | NA | 0 | 3 | Low-quality    | Genome-fragment | NA | 1.27 | 0 |
| S1_extracted_k141_153901   | 7780 | No | NA | 0 | 1 | Not-determined | Genome-fragment | NA |      | 0 |
| S1_extracted_k141_14183    | 1375 | No | NA | 0 | 1 | Not-determined | Genome-fragment | NA |      | 0 |
| S1_extracted_k141_56197    | 1457 | No | NA | 0 | 0 | Not-determined | Genome-fragment | NA |      | 0 |
| S7_vs_101433  full         | 1441 | No | NA | 1 | 0 | Low-quality    | Genome-fragment | NA | 2.81 | 0 |
| S7_vs_104572  full         | 1441 | No | NA | 1 | 0 | Low-quality    | Genome-fragment | NA | 6.94 | 0 |
| S10_vs_53281  full         | 1441 | No | NA | 1 | 1 | Low-quality    | Genome-fragment | NA | 1.36 | 0 |
| S1_extracted_k141_54263    | 2039 | No | NA | 0 | 2 | Not-determined | Genome-fragment | NA |      | 0 |
| S1_extracted_k141_134174   | 1532 | No | NA | 0 | 1 | Not-determined | Genome-fragment | NA |      | 0 |
| S1_extracted_k141_54265    | 2313 | No | NA | 0 | 1 | Not-determined | Genome-fragment | NA |      | 0 |
| S12_vs_k141_20920  full    | 1441 | No | NA | 0 | 0 | Low-quality    | Genome-fragment | NA | 3.5  | 0 |
| S1_extracted_k141_153933   | 1205 | No | NA | 0 | 1 | Not-determined | Genome-fragment | NA |      | 0 |
| S1_extracted_k141_27440    | 1308 | No | NA | 0 | 0 | Not-determined | Genome-fragment | NA |      | 0 |
| S17_vs_k141_48858  full    | 1442 | No | NA | 0 | 0 | Low-quality    | Genome-fragment | NA | 1.17 | 0 |
| S1_extracted_k141_127660   | 3198 | No | NA | 0 | 2 | Not-determined | Genome-fragment | NA |      | 0 |
| S1_extracted_k141_107461   | 1112 | No | NA | 0 | 1 | Not-determined | Genome-fragment | NA |      | 0 |
| S1_extracted_k141_80946    | 1001 | No | NA | 0 | 1 | Not-determined | Genome-fragment | NA |      | 0 |
| S1_extracted_k141_47532    | 1879 | No | NA | 0 | 1 | Not-determined | Genome-fragment | NA |      | 0 |
| S17_vs_k141_57056  full    | 1442 | No | NA | 0 | 0 | Low-quality    | Genome-fragment | NA | 2.39 | 0 |
| S1_extracted_k141_120876   | 1038 | No | NA | 0 | 2 | Not-determined | Genome-fragment | NA |      | 0 |
| S9_vs_k141_25680  full     | 1442 | No | NA | 1 | 0 | Low-quality    | Genome-fragment | NA | 3.38 | 0 |
| S1_extracted_k141_34081    | 1253 | No | NA | 0 | 1 | Not-determined | Genome-fragment | NA |      | 0 |
| S14_vs_k141_22824  full    | 1442 | No | NA | 0 | 0 | Low-quality    | Genome-fragment | NA | 1.93 | 0 |
| S1_extracted_k141_14333    | 1293 | No | NA | 0 | 1 | Not-determined | Genome-fragment | NA |      | 0 |
| S1_extracted_k141_140979   | 1253 | No | NA | 0 | 2 | Not-determined | Genome-fragment | NA |      | 0 |
| S5_vs_k141_67481  full     | 1442 | No | NA | 0 | 0 | Low-quality    | Genome-fragment | NA | 3.66 | 0 |
| S1_extracted_k141_114228   | 1232 | No | NA | 0 | 0 | Not-determined | Genome-fragment | NA |      | 0 |
| S1_extracted_k141_54331    | 1343 | No | NA | 0 | 1 | Not-determined | Genome-fragment | NA |      | 0 |
| S1_extracted_k141_60562    | 1277 | No | NA | 0 | 1 | Not-determined | Genome-fragment | NA |      | 0 |
| S1_extracted_k141_101038   | 1285 | No | NA | 0 | 0 | Not-determined | Genome-fragment | NA |      | 0 |
| S7_vs_37  full             | 1442 | No | NA | 1 | 0 | Low-quality    | Genome-fragment | NA | 1.9  | 0 |
| S1_extracted_k141_134241   | 1273 | No | NA | 0 | 0 | Not-determined | Genome-fragment | NA |      | 0 |
| S1_extracted_k141_54350    | 3080 | No | NA | 0 | 0 | Not-determined | Genome-fragment | NA |      | 0 |
| S7_vs_21596  full          | 1442 | No | NA | 0 | 0 | Low-quality    | Genome-fragment | NA | 2.25 | 0 |
| S1_extracted_k141_127747   | 1002 | No | NA | 0 | 1 | Not-determined | Genome-fragment | NA |      | 0 |
| S1_extracted_k141_87710    | 1089 | No | NA | 0 | 1 | Not-determined | Genome-fragment | NA |      | 0 |
| S1_extracted_k141_47616    | 2644 | No | NA | 0 | 1 | Not-determined | Genome-fragment | NA |      | 0 |
| S1_extracted_k141_822      | 2483 | No | NA | 0 | 2 | Not-determined | Genome-fragment | NA |      | 0 |
| S1_extracted_k141_147277   | 2558 | No | NA | 0 | 1 | Not-determined | Genome-fragment | NA |      | 0 |
| S16_vs_43755  full         | 1442 | No | NA | 0 | 0 | Low-quality    | Genome-fragment | NA | 0.54 | 0 |
| S1_extracted_k141_141072   | 1519 | No | NA | 0 | 2 | Not-determined | Genome-fragment | NA |      | 0 |
| S12_extracted_k141_14459   | 1442 | No | NA | 1 | 0 | Low-quality    | Genome-fragment | NA | 2.35 | 0 |
| S1_extracted_k141_81100    | 1127 | No | NA | 0 | 0 | Not-determined | Genome-fragment | NA |      | 0 |
| S1_extracted_k141_81104    | 3095 | No | NA | 0 | 0 | Not-determined | Genome-fragment | NA |      | 0 |
| S1_extracted_k141_141094   | 1514 | No | NA | 0 | 1 | Not-determined | Genome-fragment | NA |      | 0 |
| S1_extracted_k141_101114   | 1558 | No | NA | 0 | 1 | Not-determined | Genome-fragment | NA |      | 0 |
| S1_extracted_k141_94451    | 1087 | No | NA | 0 | 0 | Not-determined | Genome-fragment | NA |      | 0 |
| S12_vs_k141_96886  full    | 1442 | No | NA | 0 | 0 | Low-quality    | Genome-fragment | NA | 2.9  | 0 |
| S1_extracted_k141_34186    | 1004 | No | NA | 0 | 1 | Not-determined | Genome-fragment | NA |      | 0 |
| S1_extracted_k141_50631    | 2157 | No | NA | 0 | 1 | Not-determined | Genome-fragment | NA |      | 0 |
| S1_extracted_k141_20965    | 1103 | No | NA | 0 | 0 | Not-determined | Genome-fragment | NA |      | 0 |
| S8_vs_k141_202372  full    | 1442 | No | NA | 1 | 0 | Low-quality    | Genome-fragment | NA | 2.39 | 0 |
| S11_vs_k141_92838  full    | 1443 | No | NA | 0 | 1 | Low-quality    | Genome-fragment | NA | 2.09 | 0 |
| S1_extracted_k141_107620   | 1046 | No | NA | 0 | 0 | Not-determined | Genome-fragment | NA |      | 0 |
| S1_extracted_k141_101144   | 1214 | No | NA | 0 | 2 | Not-determined | Genome-fragment | NA |      | 0 |
| S14_vs_k141_90845  full    | 1443 | No | NA | 0 | 0 | Low-quality    | Genome-fragment | NA | 3.2  | 0 |
| S1_extracted_k141_34212    | 1105 | No | NA | 0 | 0 | Not-determined | Genome-fragment | NA |      | 0 |
| S14_vs_k141_12316  l22gene | 1443 | No | NA | 1 | 0 | Low-quality    | Genome-fragment | NA | 1.89 | 0 |
| S1_extracted_k141_141154   | 1376 | No | NA | 0 | 0 | Not-determined | Genome-fragment | NA |      | 0 |
| S1_vs_k141_131439  l22gene | 1443 | No | NA | 0 | 0 | Low-quality    | Genome-fragment | NA | 4.04 | 0 |
| S1_extracted_k141_20994    | 3135 | No | NA | 0 | 1 | Not-determined | Genome-fragment | NA |      | 0 |
| S3_vs_k141_17658  full     | 1443 | No | NA | 0 | 0 | Low-quality    | Genome-fragment | NA | 0.93 | 0 |
| S1_extracted_k141_114369   | 1086 | No | NA | 0 | 1 | Not-determined | Genome-fragment | NA |      | 0 |
| S1_extracted_k141_87781    | 3170 | No | NA | 0 | 0 | Not-determined | Genome-fragment | NA |      | 0 |
| S1_extracted_k141_134370   | 1445 | No | NA | 0 | 0 | Not-determined | Genome-fragment | NA |      | 0 |
| S1_extracted_k141_47711    | 3043 | No | NA | 0 | 0 | Not-determined | Genome-fragment | NA |      | 0 |
| S1_extracted_k141_14615    | 1241 | No | NA | 0 | 1 | Not-determined | Genome-fragment | NA |      | 0 |
| S1_extracted_k141_27657    | 1225 | No | NA | 0 | 1 | Not-determined | Genome-fragment | NA |      | 0 |
| S1_extracted_k141_147318   | 1237 | No | NA | 0 | 0 | Not-determined | Genome-fragment | NA |      | 0 |
| S1_extracted_k141_14623    | 2459 | No | NA | 0 | 0 | Not-determined | Genome-fragment | NA |      | 0 |
| S5_extracted_k141_137822   | 1443 | No | NA | 1 | 0 | Low-quality    | Genome-fragment | NA | 6.57 | 0 |
| S1_extracted_k141_14637    | 1442 | No | NA | 0 | 0 | Not-determined | Genome-fragment | NA |      | 0 |
| S1_extracted_k141_74440    | 1506 | No | NA | 0 | 1 | Not-determined | Genome-fragment | NA |      | 0 |
| S5_vs_k141_125077  l22gene | 1443 | No | NA | 1 | 0 | Low-quality    | Genome-fragment | NA | 3.44 | 0 |
| S7_vs_101303  full         | 1443 | No | NA | 0 | 0 | Low-quality    | Genome-fragment | NA | 4.19 | 0 |
| S16_extracted_118392       | 1443 | No | NA | 0 | 1 | Low-quality    | Genome-fragment | NA | 0.24 | 0 |
| S1_extracted_k141_127906   | 1233 | No | NA | 0 | 0 | Not-determined | Genome-fragment | NA |      | 0 |
| S6_vs_k141_21228  full     | 1443 | No | NA | 0 | 0 | Low-quality    | Genome-fragment | NA | 1.89 | 0 |
| S1_extracted_k141_134447   | 6467 | No | NA | 0 | 3 | Not-determined | Genome-fragment | NA |      | 0 |
| S1_extracted_k141_141249   | 1007 | No | NA | 0 | 0 | Not-determined | Genome-fragment | NA |      | 0 |
| S17_extracted_k141_102842  | 1444 | No | NA | 2 | 0 | Low-quality    | Genome-fragment | NA | 2.04 | 0 |
| S9_vs_k141_70481  full     | 1444 | No | NA | 2 | 0 | Low-quality    | Genome-fragment | NA | 2.5  | 0 |
| S1_extracted_k141_114465   | 1045 | No | NA | 0 | 1 | Not-determined |                 |    |      |   |



|                           |       |    |    |    |   |                |                 |       |   |
|---------------------------|-------|----|----|----|---|----------------|-----------------|-------|---|
| S1_extracted_k141_94726   | 1067  | No | NA | 0  | 1 | Not-determined | Genome-fragment | NA    | 0 |
| S1_extracted_k141_67892   | 1502  | No | NA | 0  | 2 | Not-determined | Genome-fragment | NA    | 0 |
| S1_extracted_k141_94735   | 1190  | No | NA | 0  | 1 | Not-determined | Genome-fragment | NA    | 0 |
| S17_vs_k141_145686  full  | 1445  | No | NA | 0  | 0 | Low-quality    | Genome-fragment | 1.02  | 0 |
| S9_extracted_k141_82418   | 1445  | No | NA | 4  | 0 | Low-quality    | Genome-fragment | 4.77  | 0 |
| S1_extracted_k141_107924  | 1207  | No | NA | 0  | 0 | Not-determined | Genome-fragment | NA    | 0 |
| S1_extracted_k141_21250   | 1012  | No | NA | 0  | 0 | Not-determined | Genome-fragment | NA    | 0 |
| S1_extracted_k141_101426  | 1010  | No | NA | 0  | 1 | Not-determined | Genome-fragment | NA    | 0 |
| S13_extracted_59751       | 1445  | No | NA | 1  | 1 | Low-quality    | Genome-fragment | 0.8   | 0 |
| S14_extracted_k141_95559  | 1445  | No | NA | 3  | 0 | Low-quality    | Genome-fragment | 4.76  | 0 |
| S14_extracted_k141_106355 | 1445  | No | NA | 0  | 0 | Low-quality    | Genome-fragment | 2.54  | 0 |
| S14_vs_k141_3156  full    | 1445  | No | NA | 0  | 0 | Low-quality    | Genome-fragment | 1.58  | 0 |
| S1_extracted_k141_67948   | 1193  | No | NA | 0  | 1 | Not-determined | Genome-fragment | NA    | 0 |
| S1_vs_k141_48454  full    | 1445  | No | NA | 1  | 0 | Low-quality    | Genome-fragment | 0.94  | 0 |
| S1_extracted_k141_114627  | 1012  | No | NA | 0  | 1 | Not-determined | Genome-fragment | NA    | 0 |
| S1_extracted_k141_107958  | 2640  | No | NA | 0  | 0 | Not-determined | Genome-fragment | NA    | 0 |
| S1_extracted_k141_81431   | 4981  | No | NA | 0  | 0 | Not-determined | Genome-fragment | NA    | 0 |
| S5_vs_k141_114577  full   | 1445  | No | NA | 0  | 0 | Low-quality    | Genome-fragment | 3.07  | 0 |
| S1_extracted_k141_67965   | 1166  | No | NA | 0  | 1 | Not-determined | Genome-fragment | NA    | 0 |
| S1_extracted_k141_14940   | 1111  | No | NA | 0  | 1 | Not-determined | Genome-fragment | NA    | 0 |
| S1_extracted_k141_60828   | 4008  | No | NA | 0  | 2 | Not-determined | Genome-fragment | NA    | 0 |
| S16_extracted_146369      | 1445  | No | NA | 0  | 0 | Low-quality    | Genome-fragment | 3.64  | 0 |
| S1_extracted_k141_88092   | 1319  | No | NA | 0  | 1 | Not-determined | Genome-fragment | NA    | 0 |
| S1_extracted_k141_121238  | 1900  | No | NA | 0  | 0 | Not-determined | Genome-fragment | NA    | 0 |
| S1_extracted_k141_41463   | 1095  | No | NA | 0  | 1 | Not-determined | Genome-fragment | NA    | 0 |
| S10_vs_k1305  full        | 1445  | No | NA | 0  | 0 | Low-quality    | Genome-fragment | 2.48  | 0 |
| S1_extracted_k141_8103    | 1132  | No | NA | 0  | 3 | Not-determined | Genome-fragment | NA    | 0 |
| S1_extracted_k141_147441  | 1644  | No | NA | 0  | 1 | Not-determined | Genome-fragment | NA    | 0 |
| S15_extracted_56155       | 1445  | No | NA | 0  | 0 | Low-quality    | Genome-fragment | 3.15  | 0 |
| S8_extracted_k141_131413  | 1445  | No | NA | 3  | 0 | Low-quality    | Genome-fragment | 4.76  | 0 |
| S9_vs_k141_11271  full    | 1446  | No | NA | 2  | 0 | Low-quality    | Genome-fragment | 3.85  | 0 |
| S1_extracted_k141_154283  | 1589  | No | NA | 0  | 0 | Not-determined | Genome-fragment | NA    | 0 |
| S1_extracted_k141_108033  | 1919  | No | NA | 0  | 2 | Not-determined | Genome-fragment | NA    | 0 |
| S1_vs_k141_5688  full     | 1446  | No | NA | 0  | 0 | Low-quality    | Genome-fragment | 1.14  | 0 |
| S1_extracted_k141_121270  | 1457  | No | NA | 0  | 0 | Not-determined | Genome-fragment | NA    | 0 |
| S3_extracted_k141_97885   | 1446  | No | NA | 0  | 0 | Low-quality    | Genome-fragment | 1.13  | 0 |
| S3_vs_k141_103772  full   | 1446  | No | NA | 0  | 2 | Low-quality    | Genome-fragment | 0.81  | 0 |
| S1_extracted_k141_94880   | 1423  | No | NA | 0  | 0 | Not-determined | Genome-fragment | NA    | 0 |
| S3_vs_k141_6308  full     | 1446  | No | NA | 2  | 0 | Low-quality    | Genome-fragment | 3.34  | 0 |
| S1_extracted_k141_68084   | 1122  | No | NA | 0  | 2 | Not-determined | Genome-fragment | NA    | 0 |
| S7_vs_19803  full         | 1446  | No | NA | 0  | 2 | Low-quality    | Genome-fragment | 1.14  | 0 |
| S16_extracted_11764       | 1446  | No | NA | 1  | 1 | Low-quality    | Genome-fragment | 0.47  | 0 |
| S12_vs_k141_171152  full  | 1446  | No | NA | 1  | 0 | Low-quality    | Genome-fragment | 3.73  | 0 |
| S1_extracted_k141_141498  | 1078  | No | NA | 0  | 1 | Not-determined | Genome-fragment | NA    | 0 |
| S11_vs_k141_24625  full   | 1447  | No | NA | 0  | 1 | Low-quality    | Genome-fragment | 2.22  | 0 |
| S14_extracted_k141_17134  | 1447  | No | NA | 0  | 0 | Low-quality    | Genome-fragment | 4.6   | 0 |
| S1_extracted_k141_28075   | 1285  | No | NA | 0  | 0 | Not-determined | Genome-fragment | NA    | 0 |
| S1_extracted_k141_141510  | 4322  | No | NA | 0  | 4 | Not-determined | Genome-fragment | NA    | 0 |
| S14_extracted_k141_40953  | 1447  | No | NA | 0  | 0 | Low-quality    | Genome-fragment | 1.66  | 0 |
| S1_extracted_k141_114828  | 7077  | No | NA | 0  | 2 | Not-determined | Genome-fragment | NA    | 0 |
| S1_extracted_k141_147489  | 1621  | No | NA | 0  | 0 | Not-determined | Genome-fragment | NA    | 0 |
| S1_extracted_k141_2138    | 1029  | No | NA | 0  | 0 | Not-determined | Genome-fragment | NA    | 0 |
| S1_extracted_k141_74844   | 1515  | No | NA | 0  | 2 | Not-determined | Genome-fragment | NA    | 0 |
| S14_vs_k141_6642  H2gme   | 1447  | No | NA | 2  | 0 | Low-quality    | Genome-fragment | 3.04  | 0 |
| S1_extracted_k141_74858   | 1002  | No | NA | 0  | 0 | Not-determined | Genome-fragment | NA    | 0 |
| S5_vs_k141_117816  full   | 1447  | No | NA | 2  | 0 | Low-quality    | Genome-fragment | 3.32  | 0 |
| S16_extracted_133238      | 1447  | No | NA | 4  | 0 | Low-quality    | Genome-fragment | 4.75  | 0 |
| S1_extracted_k141_95017   | 1231  | No | NA | 0  | 2 | Not-determined | Genome-fragment | NA    | 0 |
| S16_vs_k1282  full        | 1447  | No | NA | 0  | 0 | Low-quality    | Genome-fragment | 3.79  | 0 |
| S1_extracted_k141_147516  | 1124  | No | NA | 0  | 1 | Not-determined | Genome-fragment | NA    | 0 |
| S1_extracted_k141_54886   | 1008  | No | NA | 0  | 1 | Not-determined | Genome-fragment | NA    | 0 |
| S10_vs_22493  full        | 1447  | No | NA | 2  | 0 | Low-quality    | Genome-fragment | 1.08  | 0 |
| S1_extracted_k141_1259    | 3368  | No | NA | 0  | 0 | Not-determined | Genome-fragment | NA    | 0 |
| S1_extracted_k141_95036   | 1064  | No | NA | 0  | 1 | Not-determined | Genome-fragment | NA    | 0 |
| S10_vs_119860  H2gme      | 1447  | No | NA | 1  | 0 | Low-quality    | Genome-fragment | 2.43  | 0 |
| S1_extracted_k141_147526  | 1170  | No | NA | 0  | 0 | Not-determined | Genome-fragment | NA    | 0 |
| S6_vs_k141_19919  full    | 1447  | No | NA | 0  | 0 | Low-quality    | Genome-fragment | 2.8   | 0 |
| S1_extracted_k141_81649   | 1236  | No | NA | 0  | 0 | Not-determined | Genome-fragment | NA    | 0 |
| S1_extracted_k141_101740  | 1050  | No | NA | 0  | 0 | Not-determined | Genome-fragment | NA    | 0 |
| S1_extracted_k141_8333    | 3161  | No | NA | 0  | 1 | Not-determined | Genome-fragment | NA    | 0 |
| S8_extracted_k141_44652   | 1447  | No | NA | 0  | 0 | Low-quality    | Genome-fragment | 3.19  | 0 |
| S8_vs_k141_138125  full   | 1447  | No | NA | 0  | 0 | Low-quality    | Genome-fragment | 2.99  | 0 |
| S1_extracted_k141_48301   | 1153  | No | NA | 0  | 1 | Not-determined | Genome-fragment | NA    | 0 |
| S1_extracted_k141_28222   | 1731  | No | NA | 0  | 1 | Not-determined | Genome-fragment | NA    | 0 |
| S1_extracted_k141_41677   | 1199  | No | NA | 0  | 1 | Not-determined | Genome-fragment | NA    | 0 |
| S8_vs_k141_207778  full   | 1447  | No | NA | 0  | 1 | Low-quality    | Genome-fragment | 1.72  | 0 |
| S1_extracted_k141_88319   | 1142  | No | NA | 0  | 0 | Not-determined | Genome-fragment | NA    | 0 |
| S1_extracted_k141_81711   | 1066  | No | NA | 0  | 0 | Not-determined | Genome-fragment | NA    | 0 |
| S1_extracted_k141_15273   | 1139  | No | NA | 0  | 0 | Not-determined | Genome-fragment | NA    | 0 |
| S1_extracted_k141_55012   | 1054  | No | NA | 0  | 1 | Not-determined | Genome-fragment | NA    | 0 |
| S1_extracted_k141_68301   | 1551  | No | NA | 0  | 2 | Not-determined | Genome-fragment | NA    | 0 |
| S1_extracted_k141_21607   | 1264  | No | NA | 0  | 0 | Not-determined | Genome-fragment | NA    | 0 |
| S1_extracted_k141_147574  | 2406  | No | NA | 0  | 1 | Not-determined | Genome-fragment | NA    | 0 |
| S17_extracted_k141_61364  | 1448  | No | NA | 0  | 0 | Low-quality    | Genome-fragment | 1.47  | 0 |
| S1_extracted_k141_75103   | 1177  | No | NA | 0  | 2 | Not-determined | Genome-fragment | NA    | 0 |
| S1_extracted_k141_68343   | 1152  | No | NA | 0  | 1 | Not-determined | Genome-fragment | NA    | 0 |
| S1_extracted_k141_147578  | 5782  | No | NA | 0  | 1 | Not-determined | Genome-fragment | NA    | 0 |
| S9_vs_k141_65889  full    | 1448  | No | NA | 2  | 0 | Low-quality    | Genome-fragment | 2.26  | 0 |
| S1_extracted_k141_95168   | 1320  | No | NA | 0  | 1 | Not-determined | Genome-fragment | NA    | 0 |
| S1_extracted_k141_66394   | 1448  | No | NA | 0  | 0 | Low-quality    | Genome-fragment | 1.47  | 0 |
| S1_extracted_k141_34779   | 2133  | No | NA | 0  | 1 | Not-determined | Genome-fragment | NA    | 0 |
| S1_extracted_k141_28375   | 1155  | No | NA | 0  | 1 | Not-determined | Genome-fragment | NA    | 0 |
| S1_extracted_k141_95205   | 1126  | No | NA | 0  | 2 | Not-determined | Genome-fragment | NA    | 0 |
| S1_extracted_k141_88413   | 1225  | No | NA | 0  | 2 | Not-determined | Genome-fragment | NA    | 0 |
| S1_extracted_k141_10187   | 1090  | No | NA | 0  | 0 | Not-determined | Genome-fragment | NA    | 0 |
| S1_extracted_k141_135081  | 1613  | No | NA | 0  | 1 | Not-determined | Genome-fragment | NA    | 0 |
| S1_extracted_k141_21695   | 1552  | No | NA | 0  | 2 | Not-determined | Genome-fragment | NA    | 0 |
| S1_extracted_k141_154570  | 1837  | No | NA | 0  | 1 | Not-determined | Genome-fragment | NA    | 0 |
| S1_vs_k141_105720  full   | 1448  | No | NA | 0  | 1 | Low-quality    | Genome-fragment | 1.02  | 0 |
| S5_vs_k141_13759  full    | 1448  | No | NA | 3  | 0 | Low-quality    | Genome-fragment | 4.53  | 0 |
| S16_vs_21217  full        | 1448  | No | NA | 2  | 0 | Low-quality    | Genome-fragment | 3.09  | 0 |
| S1_extracted_k141_8521    | 1053  | No | NA | 0  | 0 | Not-determined | Genome-fragment | NA    | 0 |
| S1_extracted_k141_95225   | 3571  | No | NA | 0  | 4 | Not-determined | Genome-fragment | NA    | 0 |
| S1_extracted_k141_28398   | 28234 | No | NA | 10 | 0 | Medium-quality | Genome-fragment | 61.16 | 0 |
| S16_vs_18779  full        | 1448  | No | NA | 1  | 0 | Low-quality    | Genome-fragment | 3.52  | 0 |
| S8_vs_k141_192282  full   | 1448  | No | NA | 0  | 1 | Low-quality    | Genome-fragment | 1.68  | 0 |
| S8_vs_k141_153029  full   | 1448  | No | NA | 1  | 0 | Low-quality    | Genome-fragment | 1     | 0 |
| S8_vs_k141_205520  full   | 1448  | No | NA | 2  | 0 | Low-quality    | Genome-fragment | 3.1   | 0 |
| S8_vs_k141_115110  full   | 1448  | No | NA | 0  | 0 | Low-quality    | Genome-fragment | 2.01  | 0 |
| S8_vs_k141_103165  H2gme  | 1448  | No | NA | 1  | 0 | Low-quality    | Genome-fragment | 2.15  | 0 |
| S1_extracted_k141_21719   | 1083  | No | NA | 0  | 1 | Not-determined | Genome-fragment | NA    | 0 |
| S1_extracted_k141_68461   | 1175  | No | NA | 0  | 0 | Not-determined | Genome-fragment | NA    | 0 |
| S11_vs_k141_81053  full   | 1449  | No | NA | 0  | 0 | Low-quality    | Genome-fragment | 3.6   | 0 |
| S1_extracted_k141_108445  | 2027  | No | NA | 0  | 1 | Not-determined | Genome-fragment | NA    | 0 |
| S1_extracted_k141_81934   | 4655  | No | NA | 0  | 1 | Not-determined | Genome-fragment | NA    | 0 |
| S1_extracted_k141_48565   | 2287  | No | NA | 0  | 0 | Not-determined | Genome-fragment | NA    | 0 |
| S1_extracted_k141_147632  | 4887  | No | NA | 0  | 2 | Not-determined | Genome-fragment | NA    | 0 |
| S1_extracted_k141_86510   | 3252  | No | NA | 0  | 3 | Not-determined | Genome-fragment | NA    | 0 |
| S1_extracted_k141_15508   | 1154  | No | NA | 0  | 0 | Not-determined | Genome-fragment | NA    | 0 |
| S13_vs_128473  full       | 1449  | No | NA | 0  | 0 | Low-quality    | Genome-fragment | 2.4   | 0 |
| S1_extracted_k141_154623  | 6139  | No | NA | 0  | 4 | Not-determined | Genome-fragment | NA    | 0 |
| S13_vs_138016  full       | 1449  | No | NA | 0  | 0 | Low-quality    | Genome-fragment | 3.39  | 0 |
| S1_extracted_k141_28489   | 1396  | No | NA | 0  | 0 | Not-determined | Genome-fragment | NA    | 0 |
| S1_extracted_k141_75237   | 1294  | No | NA | 0  | 1 | Not-determined | Genome-fragment | NA    | 0 |
| S1_extracted_k141_41958   | 2098  | No | NA | 0  | 1 | Not-determined | Genome-fragment | NA    | 0 |
| S14_extracted_k141_63361  | 1449  | No | NA | 3  | 0 | Low-quality    | Genome-fragment | 2.96  | 0 |
| S1_extracted_k141_81992   | 1872  | No | NA | 0  | 0 | Not-determined | Genome-fragment | NA    | 0 |
| S1_extracted_k141_14195   | 1529  | No | NA | 0  | 3 | Not-determined | Genome-fragment | NA    | 0 |
| S1_extracted_k141_102022  | 3835  | No | NA | 0  | 1 | Not-determined | Genome-fragment | NA    | 0 |
| S1_extracted_k141_68564   | 1025  | No | NA | 0  | 1 | Not-determined | Genome-fragment | NA    | 0 |
| S14_vs_k141_35100  full   | 1449  | No | NA | 0  | 3 | Low-quality    | Genome-fragment | 0.65  | 0 |
| S1_extracted_k141_115281  | 1208  | No | NA | 0  | 0 | Not-determined | Genome-fragment | NA    | 0 |
| S1_extracted_k141_34916   | 1370  | No | NA | 0  | 1 | Not-determined | Genome-fragment | NA    | 0 |
| S1_vs_k141_43354  full    | 1449  | No | NA | 1  | 0 | Low-quality    | Genome-fragment | 3.77  | 0 |
| S1_extracted_k141_48647   | 1043  | No | NA | 0  | 1 | Not-determined | Genome-fragment | NA    | 0 |
| S1_extracted_k141_15611   | 4104  | No | NA | 0  | 1 | Not-determined | Genome-fragment | NA    | 0 |
| S1_extracted_k141_28540   | 1010  | No | NA | 0  | 0 | Not-determined | Genome-fragment | NA    | 0 |
| S1_extracted_k141_128717  | 1871  | No | NA | 0  | 1 | Not-determined | Genome-fragment | NA    | 0 |
| S1_extracted_k141_1564    | 1335  | No | NA | 0  | 0 | Not-determined | Genome-fragment | NA    | 0 |
| S1_extracted_k141_34932   | 1355  | No | NA | 0  | 0 | Not-determined | Genome-fragment | NA    | 0 |
| S1_extracted_k141_21844   | 1174  | No | NA | 0  | 0 | Not-determined | Genome-fragment | NA    | 0 |
| S1_extracted_k141_115283  | 1383  | No | NA | 0  | 0 | Not-determined | Genome-fragment | NA    | 0 |
| S1_extracted_k141_61093   | 1279  | No | NA | 0  | 2 | Not-determined | Genome-fragment | NA    | 0 |
| S1_extracted_k141_1582    | 4432  | No | NA | 0  | 3 | Not-determined | Genome-fragment | NA    | 0 |
| S1_extracted_k141_95423   | 1317  | No | NA | 0  | 1 | Not-determined | Genome-fragment | NA    | 0 |
| S1_extracted_k141_34969   | 1404  |    |    |    |   |                |                 |       |   |



|                              |       |    |    |    |   |                |                 |    |       |
|------------------------------|-------|----|----|----|---|----------------|-----------------|----|-------|
| S1_extracted_k141_42214      | 2194  | No | NA | 0  | 0 | Not-determined | Genome-fragment | NA | 0     |
| S1_extracted_k141_41257      | 1310  | No | NA | 0  | 0 | Not-determined | Genome-fragment | NA | 0     |
| S1_extracted_k141_8884       | 1135  | No | NA | 0  | 0 | Not-determined | Genome-fragment | NA | 0     |
| S3_vs_k141_2522  full        | 1450  | No | NA | 2  | 0 | Low-quality    | Genome-fragment | NA | 2.52  |
| S1_extracted_k141_108820     | 1148  | No | NA | 0  | 0 | Not-determined | Genome-fragment | NA | 0     |
| S5_extracted_k141_89722      | 1450  | No | NA | 3  | 0 | Low-quality    | Genome-fragment | NA | 4.75  |
| S1_extracted_k141_128998     | 1045  | No | NA | 0  | 1 | Not-determined | Genome-fragment | NA | 0     |
| S7_vs_109915  full           | 1450  | No | NA | 1  | 0 | Low-quality    | Genome-fragment | NA | 2.54  |
| S12_vs_k141_135131  H2genome | 1450  | No | NA | 0  | 0 | Low-quality    | Genome-fragment | NA | 3.11  |
| S1_extracted_k141_95707      | 2500  | No | NA | 0  | 2 | Not-determined | Genome-fragment | NA | 0     |
| S15_vs_15419  full           | 1450  | No | NA | 0  | 1 | Low-quality    | Genome-fragment | NA | 2.85  |
| S1_extracted_k141_135557     | 2844  | No | NA | 0  | 2 | Not-determined | Genome-fragment | NA | 0     |
| S1_extracted_k141_75630      | 2568  | No | NA | 0  | 0 | Not-determined | Genome-fragment | NA | 0     |
| S1_extracted_k141_135573     | 1168  | No | NA | 0  | 1 | Not-determined | Genome-fragment | NA | 0     |
| S1_extracted_k141_108884     | 1323  | No | NA | 0  | 1 | Not-determined | Genome-fragment | NA | 0     |
| S4_extracted_10849           | 1450  | No | NA | 0  | 0 | Low-quality    | Genome-fragment | NA | 4.77  |
| S4_extracted_12542           | 1450  | No | NA | 2  | 0 | Low-quality    | Genome-fragment | NA | 4.78  |
| S1_extracted_k141_61296      | 1461  | No | NA | 0  | 0 | Not-determined | Genome-fragment | NA | 0     |
| S1_extracted_k141_115648     | 1224  | No | NA | 0  | 1 | Not-determined | Genome-fragment | NA | 0     |
| S17_extracted_k141_158510    | 1451  | No | NA | 0  | 0 | Low-quality    | Genome-fragment | NA | 2.87  |
| S1_extracted_k141_16044      | 3449  | No | NA | 0  | 1 | Not-determined | Genome-fragment | NA | 0     |
| S1_extracted_k141_90759      | 1220  | No | NA | 0  | 1 | Not-determined | Genome-fragment | NA | 0     |
| S1_extracted_k141_122178     | 1080  | No | NA | 0  | 1 | Not-determined | Genome-fragment | NA | 0     |
| S1_extracted_k141_16052      | 1062  | No | NA | 0  | 1 | Not-determined | Genome-fragment | NA | 0     |
| S1_extracted_k141_16056      | 1213  | No | NA | 0  | 0 | Not-determined | Genome-fragment | NA | 0     |
| S17_extracted_k141_48468     | 1451  | No | NA | 0  | 1 | Not-determined | Genome-fragment | NA | 1.96  |
| S1_extracted_k141_55657      | 1413  | No | NA | 0  | 1 | Not-determined | Genome-fragment | NA | 0     |
| S1_extracted_k141_115694     | 1016  | No | NA | 0  | 1 | Not-determined | Genome-fragment | NA | 0     |
| S1_extracted_k141_108930     | 1100  | No | NA | 0  | 1 | Not-determined | Genome-fragment | NA | 0     |
| S9_extracted_k141_81429      | 1451  | No | NA | 0  | 0 | Low-quality    | Genome-fragment | NA | 1.66  |
| S1_extracted_k141_75689      | 1140  | No | NA | 0  | 1 | Not-determined | Genome-fragment | NA | 0     |
| S1_extracted_k141_22149      | 4211  | No | NA | 0  | 0 | High-quality   | Genome-fragment | NA | 91.64 |
| S9_vs_k141_49470  full       | 1451  | No | NA | 0  | 1 | Low-quality    | Genome-fragment | NA | 2.23  |
| S1_extracted_k141_154951     | 1193  | No | NA | 0  | 0 | Not-determined | Genome-fragment | NA | 0     |
| S1_extracted_k141_108949     | 3616  | No | NA | 0  | 2 | Not-determined | Genome-fragment | NA | 0     |
| S1_extracted_k141_68949      | 8669  | No | NA | 18 | 0 | Not-determined | Genome-fragment | NA | 0     |
| S14_vs_k141_114582  full     | 1451  | No | NA | 0  | 0 | Low-quality    | Genome-fragment | NA | 3.4   |
| S1_extracted_k141_82457      | 1004  | No | NA | 0  | 0 | Not-determined | Genome-fragment | NA | 0     |
| S1_extracted_k141_79735      | 4761  | No | NA | 0  | 1 | Not-determined | Genome-fragment | NA | 0     |
| S1_extracted_k141_79746      | 1454  | No | NA | 0  | 1 | Not-determined | Genome-fragment | NA | 0     |
| S1_extracted_k141_115759     | 1194  | No | NA | 0  | 1 | Not-determined | Genome-fragment | NA | 0     |
| S5_extracted_k141_45159      | 1451  | No | NA | 0  | 0 | Low-quality    | Genome-fragment | NA | 5.17  |
| S1_extracted_k141_122279     | 3177  | No | NA | 0  | 1 | Not-determined | Genome-fragment | NA | 0     |
| S1_extracted_k141_69000      | 1338  | No | NA | 0  | 0 | Not-determined | Genome-fragment | NA | 0     |
| S12_vs_k141_163464  H2genome | 1451  | No | NA | 2  | 0 | Low-quality    | Genome-fragment | NA | 4.23  |
| S2_extracted_k141_5097       | 1451  | No | NA | 0  | 0 | Low-quality    | Genome-fragment | NA | 1.43  |
| S8_vs_k141_160091  full      | 1451  | No | NA | 0  | 0 | Low-quality    | Genome-fragment | NA | 1.4   |
| S17_extracted_k141_134432    | 1452  | No | NA | 1  | 0 | Low-quality    | Genome-fragment | NA | 2.4   |
| S11_vs_k141_45791  full      | 1452  | No | NA | 0  | 0 | Low-quality    | Genome-fragment | NA | 3.08  |
| S1_extracted_k141_29055      | 1317  | No | NA | 0  | 0 | Not-determined | Genome-fragment | NA | 0     |
| S1_vs_k141_125591  full      | 1452  | No | NA | 0  | 1 | Low-quality    | Genome-fragment | NA | 3.1   |
| S5_extracted_k141_13858      | 1452  | No | NA | 0  | 0 | Low-quality    | Genome-fragment | NA | 1.79  |
| S1_extracted_k141_115845     | 1012  | No | NA | 0  | 1 | Not-determined | Genome-fragment | NA | 0     |
| S1_extracted_k141_29064      | 1081  | No | NA | 0  | 1 | Not-determined | Genome-fragment | NA | 0     |
| S1_extracted_k141_42513      | 2938  | No | NA | 0  | 2 | Not-determined | Genome-fragment | NA | 0     |
| S1_extracted_k141_18320      | 1248  | No | NA | 0  | 0 | Not-determined | Genome-fragment | NA | 0     |
| S1_extracted_k141_95960      | 1221  | No | NA | 0  | 1 | Not-determined | Genome-fragment | NA | 0     |
| S7_vs_26865  full            | 1452  | No | NA | 0  | 1 | Low-quality    | Genome-fragment | NA | 1.81  |
| S1_extracted_k141_142484     | 1220  | No | NA | 0  | 0 | Not-determined | Genome-fragment | NA | 0     |
| S16_extracted_170077         | 1452  | No | NA | 0  | 0 | Low-quality    | Genome-fragment | NA | 2.43  |
| S1_extracted_k141_42533      | 1102  | No | NA | 0  | 1 | Not-determined | Genome-fragment | NA | 0     |
| S10_vs_115054  full          | 1452  | No | NA | 0  | 1 | Low-quality    | Genome-fragment | NA | 0.52  |
| S1_extracted_k141_9195       | 1340  | No | NA | 0  | 2 | Not-determined | Genome-fragment | NA | 0     |
| S1_extracted_k141_16245      | 1468  | No | NA | 0  | 0 | Not-determined | Genome-fragment | NA | 0     |
| S1_extracted_k141_29103      | 1273  | No | NA | 0  | 0 | Not-determined | Genome-fragment | NA | 0     |
| S1_extracted_k141_42555      | 4632  | No | NA | 0  | 5 | Not-determined | Genome-fragment | NA | 0     |
| S1_extracted_k141_9224       | 1302  | No | NA | 0  | 1 | Not-determined | Genome-fragment | NA | 0     |
| S1_extracted_k141_147938     | 2391  | No | NA | 0  | 1 | Not-determined | Genome-fragment | NA | 0     |
| S1_extracted_k141_42576      | 1465  | No | NA | 0  | 1 | Not-determined | Genome-fragment | NA | 0     |
| S12_extracted_k141_123490    | 1452  | No | NA | 0  | 0 | Low-quality    | Genome-fragment | NA | 2.66  |
| S1_extracted_k141_155049     | 1616  | No | NA | 0  | 1 | Not-determined | Genome-fragment | NA | 0     |
| S1_extracted_k141_79888      | 1058  | No | NA | 0  | 0 | Not-determined | Genome-fragment | NA | 0     |
| S4_extracted_8680            | 1452  | No | NA | 0  | 0 | Low-quality    | Genome-fragment | NA | 2.44  |
| S17_vs_k141_50321  full      | 1453  | No | NA | 0  | 1 | Low-quality    | Genome-fragment | NA | 1.97  |
| S1_extracted_k141_13533      | 1476  | No | NA | 0  | 0 | Not-determined | Genome-fragment | NA | 0     |
| S1_extracted_k141_96071      | 1491  | No | NA | 0  | 1 | Not-determined | Genome-fragment | NA | 0     |
| S17_vs_k141_142206  H2genome | 1453  | No | NA | 1  | 0 | Low-quality    | Genome-fragment | NA | 3.78  |
| S14_extracted_k141_14153     | 1453  | No | NA | 1  | 0 | Low-quality    | Genome-fragment | NA | 2.24  |
| S1_extracted_k141_35409      | 1071  | No | NA | 0  | 0 | Not-determined | Genome-fragment | NA | 0     |
| S3_vs_k141_45230  full       | 1453  | No | NA | 1  | 0 | Low-quality    | Genome-fragment | NA | 4.02  |
| S7_vs_78210  full            | 1453  | No | NA | 0  | 0 | Low-quality    | Genome-fragment | NA | 3.73  |
| S1_extracted_k141_142633     | 1053  | No | NA | 0  | 1 | Not-determined | Genome-fragment | NA | 0     |
| S1_extracted_k141_82718      | 1078  | No | NA | 0  | 0 | Not-determined | Genome-fragment | NA | 0     |
| S16_vs_125296  full          | 1453  | No | NA | 1  | 0 | Low-quality    | Genome-fragment | NA | 0.94  |
| S16_vs_144420  H2genome      | 1453  | No | NA | 0  | 0 | Low-quality    | Genome-fragment | NA | 4.52  |
| S1_extracted_k141_61560      | 1350  | No | NA | 0  | 0 | Not-determined | Genome-fragment | NA | 0     |
| S1_extracted_k141_61563      | 1051  | No | NA | 0  | 0 | Not-determined | Genome-fragment | NA | 0     |
| S1_extracted_k141_142647     | 3583  | No | NA | 0  | 0 | Not-determined | Genome-fragment | NA | 0     |
| S1_extracted_k141_96125      | 1062  | No | NA | 0  | 0 | Not-determined | Genome-fragment | NA | 0     |
| S1_extracted_k141_49391      | 1164  | No | NA | 0  | 1 | Not-determined | Genome-fragment | NA | 0     |
| S1_extracted_k141_82765      | 1135  | No | NA | 0  | 2 | Not-determined | Genome-fragment | NA | 0     |
| S1_extracted_k141_135963     | 1358  | No | NA | 0  | 2 | Not-determined | Genome-fragment | NA | 0     |
| S6_vs_k141_42379  full       | 1453  | No | NA | 0  | 2 | Low-quality    | Genome-fragment | NA | 1.35  |
| S1_extracted_k141_89262      | 1117  | No | NA | 0  | 1 | Not-determined | Genome-fragment | NA | 0     |
| S8_vs_k141_4557  full        | 1453  | No | NA | 0  | 0 | Low-quality    | Genome-fragment | NA | 2.92  |
| S9_vs_k141_73088  full       | 1454  | No | NA | 0  | 0 | Low-quality    | Genome-fragment | NA | 1.47  |
| S7_extracted_21155           | 1454  | No | NA | 0  | 0 | Low-quality    | Genome-fragment | NA | 2.71  |
| S7_vs_114936  full           | 1454  | No | NA | 0  | 0 | Low-quality    | Genome-fragment | NA | 3.31  |
| S1_extracted_k141_135985     | 2078  | No | NA | 0  | 0 | Not-determined | Genome-fragment | NA | 0     |
| S1_extracted_k141_116098     | 1204  | No | NA | 0  | 1 | Not-determined | Genome-fragment | NA | 0     |
| S16_vs_35190  full           | 1454  | No | NA | 0  | 0 | Low-quality    | Genome-fragment | NA | 1.85  |
| S1_extracted_k141_129462     | 1349  | No | NA | 0  | 1 | Not-determined | Genome-fragment | NA | 0     |
| S10_vs_38948  full           | 1454  | No | NA | 0  | 0 | Low-quality    | Genome-fragment | NA | 2.55  |
| S10_vs_42752  full           | 1454  | No | NA | 0  | 0 | Low-quality    | Genome-fragment | NA | 1.81  |
| S1_extracted_k141_22491      | 1652  | No | NA | 0  | 1 | Not-determined | Genome-fragment | NA | 0     |
| S8_extracted_k141_176338     | 1454  | No | NA | 0  | 0 | Low-quality    | Genome-fragment | NA | 0.95  |
| S1_extracted_k141_122563     | 2311  | No | NA | 0  | 1 | Not-determined | Genome-fragment | NA | 0     |
| S1_extracted_k141_82852      | 5260  | No | NA | 0  | 3 | Not-determined | Genome-fragment | NA | 0     |
| S1_extracted_k141_16536      | 1246  | No | NA | 0  | 0 | Not-determined | Genome-fragment | NA | 0     |
| S8_vs_k141_1278  full        | 1454  | No | NA | 1  | 0 | Low-quality    | Genome-fragment | NA | 2.87  |
| S1_extracted_k141_116191     | 3158  | No | NA | 0  | 3 | Not-determined | Genome-fragment | NA | 0     |
| S1_extracted_k141_96240      | 3214  | No | NA | 0  | 3 | Not-determined | Genome-fragment | NA | 0     |
| S1_extracted_k141_16567      | 7933  | No | NA | 0  | 3 | Not-determined | Genome-fragment | NA | 0     |
| S1_extracted_k141_29446      | 1095  | No | NA | 0  | 1 | Not-determined | Genome-fragment | NA | 0     |
| S1_extracted_k141_148025     | 1163  | No | NA | 0  | 1 | Not-determined | Genome-fragment | NA | 0     |
| S1_extracted_k141_29459      | 1316  | No | NA | 0  | 2 | Not-determined | Genome-fragment | NA | 0     |
| S1_extracted_k141_35579      | 1254  | No | NA | 0  | 0 | Not-determined | Genome-fragment | NA | 0     |
| S17_extracted_k141_81467     | 1455  | No | NA | 0  | 1 | Low-quality    | Genome-fragment | NA | 0.24  |
| S1_extracted_k141_89384      | 1030  | No | NA | 0  | 0 | Not-determined | Genome-fragment | NA | 0     |
| S1_extracted_k141_129574     | 3585  | No | NA | 0  | 2 | Not-determined | Genome-fragment | NA | 0     |
| S1_extracted_k141_136113     | 10754 | No | NA | 0  | 1 | Not-determined | Genome-fragment | NA | 0     |
| S1_extracted_k141_22508      | 1118  | No | NA | 0  | 1 | Not-determined | Genome-fragment | NA | 0     |
| S1_extracted_k141_96286      | 2133  | No | NA | 0  | 5 | Not-determined | Genome-fragment | NA | 0     |
| S1_extracted_k141_76374      | 1057  | No | NA | 0  | 2 | Not-determined | Genome-fragment | NA | 0     |
| S1_extracted_k141_143383     | 20106 | No | NA | 0  | 2 | Not-determined | Genome-fragment | NA | 0     |
| S1_extracted_k141_9562       | 1001  | No | NA | 0  | 1 | Not-determined | Genome-fragment | NA | 0     |
| S1_extracted_k141_69400      | 3726  | No | NA | 0  | 0 | Not-determined | Genome-fragment | NA | 0     |
| S1_extracted_k141_89994      | 2897  | No | NA | 0  | 0 | Not-determined | Genome-fragment | NA | 0     |
| S1_extracted_k141_42929      | 1535  | No | NA | 0  | 0 | Not-determined | Genome-fragment | NA | 0     |
| S1_extracted_k141_102997     | 1042  | No | NA | 0  | 0 | Not-determined | Genome-fragment | NA | 0     |
| S1_extracted_k141_116313     | 6847  | No | NA | 0  | 2 | Not-determined | Genome-fragment | NA | 3.36  |
| S17_vs_k141_71883  full      | 1455  | No | NA | 1  | 0 | Low-quality    | Genome-fragment | NA | 3.78  |
| S17_vs_k141_83829  H2genome  | 1455  | No | NA | 2  | 0 | Low-quality    | Genome-fragment | NA | 1.39  |
| S3_extracted_k141_22767      | 1455  | No | NA | 0  | 0 | Low-quality    | Genome-fragment | NA | 2.77  |
| S10_extracted_8897           | 1455  | No | NA | 0  | 0 | Low-quality    | Genome-fragment | NA | 1.6   |
| S1_extracted_k141_109471     | 3326  | No | NA | 0  | 1 | Not-determined | Genome-fragment | NA | 0     |
| S12_extracted_k141_28710     | 1455  | No | NA | 0  | 0 | Low-quality    | Genome-fragment | NA | 2.59  |
| S1_extracted_k141_116318     | 1128  | No | NA | 0  | 2 | Not-determined | Genome-fragment | NA | 0     |
| S12_extracted_k141_86373     | 1455  | No | NA | 1  | 0 | Low-quality    | Genome-fragment | NA | 1.96  |
| S6_vs_k141_41848  full       | 1455  | No | NA | 2  | 0 | Low-quality    | Genome-fragment | NA | 3.85  |
| S8_vs_k141_14467  full       | 1455  | No | NA | 1  | 0 | Low-quality    | Genome-fragment | NA | 2.48  |
| S17_vs_k141_126480  full     | 1456  | No | NA | 0  | 0 | Low-quality    | Genome-fragment | NA | 0     |
| S1_extracted_k141_69520      | 1693  | No | NA | 0  | 0 | Not-determined | Genome-fragment | NA | 0     |
| S1_extracted_k141_89557      | 1094  | No | NA | 0  | 1 | Not-determined | Genome-fragment | NA | 0     |
| S1_extracted_k141_22729      | 1452  | No | NA | 0  | 1 | Not-determined | Genome-fragment | NA | 0     |
| S1_extracted_k141_16789      | 2245  |    |    |    |   |                |                 |    |       |



|                           |       |    |    |    |   |                |                 |    |       |   |
|---------------------------|-------|----|----|----|---|----------------|-----------------|----|-------|---|
| S1_extracted_k141_16933   | 1890  | No | NA | 0  | 1 | Not-determined | Genome-fragment | NA |       | 0 |
| S13_extracted_k14545      | 1457  | No | NA | 0  | 1 | Low-quality    | Genome-fragment | NA | 2.82  | 0 |
| S1_extracted_k141_107387  | 1457  | No | NA | 0  | 0 | Low-quality    | Genome-fragment | NA | 3.94  | 0 |
| S1_extracted_k141_76457   | 2165  | No | NA | 0  | 1 | Not-determined | Genome-fragment | NA |       | 0 |
| S1_extracted_k141_49928   | 2295  | No | NA | 0  | 3 | Not-determined | Genome-fragment | NA |       | 0 |
| S1_extracted_k141_148170  | 1797  | No | NA | 0  | 1 | Not-determined | Genome-fragment | NA |       | 0 |
| S1_extracted_k141_136427  | 1058  | No | NA | 0  | 0 | Not-determined | Genome-fragment | NA |       | 0 |
| S1_extracted_k141_49939   | 1129  | No | NA | 0  | 1 | Not-determined | Genome-fragment | NA |       | 0 |
| S1_extracted_k141_14304   | 3404  | No | NA | 0  | 1 | Not-determined | Genome-fragment | NA |       | 0 |
| S1_extracted_k141_158229  | 1457  | No | NA | 0  | 0 | Low-quality    | Genome-fragment | NA | 2.54  | 0 |
| S3_vs_k141_116586  full   | 1457  | No | NA | 0  | 0 | Low-quality    | Genome-fragment | NA | 1.32  | 0 |
| S1_extracted_k141_81249   | 1682  | No | NA | 0  | 0 | Not-determined | Genome-fragment | NA |       | 0 |
| S1_extracted_k141_129928  | 1078  | No | NA | 0  | 0 | Not-determined | Genome-fragment | NA |       | 0 |
| S5_vs_k141_1043  full     | 1457  | No | NA | 1  | 0 | Low-quality    | Genome-fragment | NA | 2.16  | 0 |
| S16_extracted_210         | 1457  | No | NA | 0  | 2 | Low-quality    | Genome-fragment | NA | 0.46  | 0 |
| S16_extracted_115389      | 1457  | No | NA | 0  | 1 | Low-quality    | Genome-fragment | NA | 0.61  | 0 |
| S1_extracted_k141_155378  | 4100  | No | NA | 0  | 1 | Not-determined | Genome-fragment | NA |       | 0 |
| S10_vs_110152  full       | 1457  | No | NA | 1  | 0 | Low-quality    | Genome-fragment | NA | 3.29  | 0 |
| S1_extracted_k141_102361  | 1266  | No | NA | 0  | 2 | Not-determined | Genome-fragment | NA |       | 0 |
| S15_extracted_13212       | 1457  | No | NA | 0  | 0 | Low-quality    | Genome-fragment | NA | 3.52  | 0 |
| S1_extracted_k141_29861   | 1061  | No | NA | 0  | 1 | Not-determined | Genome-fragment | NA |       | 0 |
| S8_extracted_k141_165040  | 1457  | No | NA | 0  | 0 | Low-quality    | Genome-fragment | NA | 4.15  | 0 |
| S8_extracted_k141_127845  | 1457  | No | NA | 0  | 0 | Low-quality    | Genome-fragment | NA | 1.37  | 0 |
| S1_extracted_k141_148262  | 3046  | No | NA | 0  | 1 | Not-determined | Genome-fragment | NA |       | 0 |
| S1_extracted_k141_29877   | 3715  | No | NA | 0  | 2 | Not-determined | Genome-fragment | NA |       | 0 |
| S1_extracted_k141_69755   | 1815  | No | NA | 0  | 1 | Not-determined | Genome-fragment | NA |       | 0 |
| S1_extracted_k141_103436  | 2678  | No | NA | 0  | 2 | Not-determined | Genome-fragment | NA |       | 0 |
| S1_extracted_k141_130079  | 1017  | No | NA | 0  | 0 | Not-determined | Genome-fragment | NA |       | 0 |
| S1_extracted_k141_81406   | 1046  | No | NA | 0  | 0 | Not-determined | Genome-fragment | NA |       | 0 |
| S8_vs_k141_121910  full   | 1457  | No | NA | 0  | 0 | Low-quality    | Genome-fragment | NA | 2.72  | 0 |
| S17_vs_k141_22275  full   | 1458  | No | NA | 0  | 1 | Low-quality    | Genome-fragment | NA | 1.17  | 0 |
| S9_extracted_k141_87916   | 1458  | No | NA | 0  | 1 | Low-quality    | Genome-fragment | NA | 0.95  | 0 |
| S1_extracted_k141_96814   | 1225  | No | NA | 0  | 0 | Not-determined | Genome-fragment | NA |       | 0 |
| S1_extracted_k141_136526  | 31147 | No | NA | 12 | 0 | Medium-quality | Genome-fragment | NA | 73.92 | 0 |
| S1_extracted_k141_54618   | 1843  | No | NA | 0  | 2 | Not-determined | Genome-fragment | NA |       | 0 |
| S3_extracted_k141_89338   | 1458  | No | NA | 0  | 1 | Low-quality    | Genome-fragment | NA | 1.85  | 0 |
| S1_extracted_k141_83421   | 1721  | No | NA | 0  | 1 | Not-determined | Genome-fragment | NA |       | 0 |
| S1_extracted_k141_23016   | 1129  | No | NA | 0  | 1 | Not-determined | Genome-fragment | NA |       | 0 |
| S1_extracted_k141_96829   | 4581  | No | NA | 0  | 2 | Not-determined | Genome-fragment | NA |       | 0 |
| S1_extracted_k141_56635   | 1333  | No | NA | 0  | 1 | Not-determined | Genome-fragment | NA |       | 0 |
| S1_extracted_k141_143225  | 1119  | No | NA | 0  | 1 | Not-determined | Genome-fragment | NA |       | 0 |
| S1_extracted_k141_12029   | 1189  | No | NA | 0  | 0 | Not-determined | Genome-fragment | NA |       | 0 |
| S1_extracted_k141_143228  | 1400  | No | NA | 0  | 0 | Not-determined | Genome-fragment | NA |       | 0 |
| S1_extracted_k141_83448   | 1198  | No | NA | 0  | 1 | Not-determined | Genome-fragment | NA |       | 0 |
| S1_extracted_k141_10087   | 1293  | No | NA | 0  | 0 | Not-determined | Genome-fragment | NA |       | 0 |
| S5_extracted_k141_80449   | 1458  | No | NA | 0  | 0 | Low-quality    | Genome-fragment | NA | 2.88  | 0 |
| S1_extracted_k141_69812   | 1503  | No | NA | 0  | 0 | Not-determined | Genome-fragment | NA |       | 0 |
| NC3_vs_k141_2069          | 1458  | No | NA | 0  | 0 | Low-quality    | Genome-fragment | NA | 2.27  | 0 |
| S1_extracted_k141_56686   | 1162  | No | NA | 0  | 0 | Not-determined | Genome-fragment | NA |       | 0 |
| S10_vs_39050  full        | 1458  | No | NA | 0  | 0 | Low-quality    | Genome-fragment | NA | 2.86  | 0 |
| S12_extracted_k141_28707  | 1458  | No | NA | 0  | 0 | Low-quality    | Genome-fragment | NA | 3.32  | 0 |
| S12_extracted_k141_116611 | 1458  | No | NA | 0  | 0 | Low-quality    | Genome-fragment | NA | 3.89  | 0 |
| S8_extracted_k141_133117  | 1458  | No | NA | 1  | 0 | Low-quality    | Genome-fragment | NA |       | 0 |
| S8_vs_k141_178635  full   | 1458  | No | NA | 0  | 0 | Low-quality    | Genome-fragment | NA | 3.66  | 0 |
| S1_extracted_k141_103548  | 1066  | No | NA | 0  | 0 | Not-determined | Genome-fragment | NA |       | 0 |
| S17_vs_k141_155588  full  | 1459  | No | NA | 2  | 0 | Low-quality    | Genome-fragment | NA | 3.57  | 0 |
| S1_extracted_k141_110052  | 1049  | No | NA | 0  | 1 | Not-determined | Genome-fragment | NA |       | 0 |
| S1_extracted_k141_69838   | 2215  | No | NA | 0  | 1 | Not-determined | Genome-fragment | NA |       | 0 |
| S1_extracted_k141_106818  | 1459  | No | NA | 0  | 0 | Low-quality    | Genome-fragment | NA | 1.47  | 0 |
| S1_extracted_k141_69839   | 1060  | No | NA | 0  | 1 | Not-determined | Genome-fragment | NA |       | 0 |
| S5_vs_k141_17501  full    | 1459  | No | NA | 0  | 1 | Low-quality    | Genome-fragment | NA | 1.15  | 0 |
| S1_extracted_k141_90008   | 1201  | No | NA | 0  | 1 | Not-determined | Genome-fragment | NA |       | 0 |
| S1_extracted_k141_50288   | 1767  | No | NA | 0  | 1 | Not-determined | Genome-fragment | NA |       | 0 |
| S16_vs_37247  full        | 1459  | No | NA | 0  | 0 | Low-quality    | Genome-fragment | NA | 2.57  | 0 |
| S10_extracted_54021       | 1459  | No | NA | 0  | 0 | Low-quality    | Genome-fragment | NA | 4.39  | 0 |
| S1_extracted_k141_17758   | 1182  | No | NA | 0  | 0 | Not-determined | Genome-fragment | NA |       | 0 |
| S1_extracted_k141_103612  | 2326  | No | NA | 0  | 1 | Not-determined | Genome-fragment | NA |       | 0 |
| S6_vs_k141_17079  full    | 1459  | No | NA | 0  | 0 | Low-quality    | Genome-fragment | NA | 3.73  | 0 |
| S1_extracted_k141_41548   | 1228  | No | NA | 0  | 0 | Not-determined | Genome-fragment | NA |       | 0 |
| S8_extracted_k141_123889  | 1459  | No | NA | 0  | 1 | Low-quality    | Genome-fragment | NA | 1.44  | 0 |
| S1_extracted_k141_155550  | 1282  | No | NA | 0  | 1 | Not-determined | Genome-fragment | NA |       | 0 |
| S8_vs_k141_180109  full   | 1459  | No | NA | 0  | 0 | Low-quality    | Genome-fragment | NA | 4.64  | 0 |
| S11_vs_k141_53711  full   | 1460  | No | NA | 0  | 0 | Low-quality    | Genome-fragment | NA | 2.59  | 0 |
| S1_extracted_k141_62237   | 1777  | No | NA | 0  | 0 | Not-determined | Genome-fragment | NA |       | 0 |
| S1_extracted_k141_17302   | 1559  | No | NA | 0  | 1 | Not-determined | Genome-fragment | NA |       | 0 |
| S1_extracted_k141_2838    | 1528  | No | NA | 0  | 1 | Not-determined | Genome-fragment | NA |       | 0 |
| S1_extracted_k141_123326  | 4263  | No | NA | 0  | 2 | Not-determined | Genome-fragment | NA |       | 0 |
| S1_extracted_k141_90062   | 1041  | No | NA | 0  | 3 | Not-determined | Genome-fragment | NA |       | 0 |
| S1_extracted_k141_116981  | 1042  | No | NA | 0  | 1 | Not-determined | Genome-fragment | NA |       | 0 |
| S1_extracted_k141_36130   | 7262  | No | NA | 0  | 1 | Not-determined | Genome-fragment | NA |       | 0 |
| S13_extracted_835         | 1460  | No | NA | 0  | 1 | Low-quality    | Genome-fragment | NA | 0.27  | 0 |
| S1_extracted_k141_143400  | 1410  | No | NA | 0  | 2 | Not-determined | Genome-fragment | NA |       | 0 |
| S13_extracted_29615       | 1460  | No | NA | 0  | 0 | Low-quality    | Genome-fragment | NA | 1.51  | 0 |
| S13_extracted_32269       | 1460  | No | NA | 0  | 0 | Low-quality    | Genome-fragment | NA | 0.78  | 0 |
| S1_extracted_k141_120252  | 3536  | No | NA | 0  | 0 | Not-determined | Genome-fragment | NA |       | 0 |
| S1_extracted_k141_123368  | 1190  | No | NA | 0  | 0 | Not-determined | Genome-fragment | NA |       | 0 |
| S13_vs_79868  full        | 1460  | No | NA | 0  | 0 | Low-quality    | Genome-fragment | NA | 2.46  | 0 |
| S13_vs_81708  full        | 1460  | No | NA | 0  | 0 | Low-quality    | Genome-fragment | NA | 0.79  | 0 |
| S1_extracted_k141_136793  | 3930  | No | NA | 0  | 2 | Not-determined | Genome-fragment | NA |       | 0 |
| S1_extracted_k141_117040  | 1065  | No | NA | 0  | 1 | Not-determined | Genome-fragment | NA |       | 0 |
| S5_vs_k141_17656  full    | 1460  | No | NA | 1  | 0 | Low-quality    | Genome-fragment | NA | 3.44  | 0 |
| S1_extracted_k141_69917   | 1460  | No | NA | 0  | 0 | Not-determined | Genome-fragment | NA |       | 0 |
| S5_vs_k141_94120  full    | 1460  | No | NA | 0  | 2 | Low-quality    | Genome-fragment | NA | 1.41  | 0 |
| S1_extracted_k141_110192  | 1386  | No | NA | 0  | 1 | Not-determined | Genome-fragment | NA |       | 0 |
| S1_extracted_k141_148424  | 1009  | No | NA | 0  | 0 | Not-determined | Genome-fragment | NA |       | 0 |
| S5_vs_k141_21134  full    | 1460  | No | NA | 0  | 0 | Low-quality    | Genome-fragment | NA | 1.81  | 0 |
| S1_extracted_k141_50380   | 1010  | No | NA | 0  | 3 | Not-determined | Genome-fragment | NA |       | 0 |
| S1_extracted_k141_36172   | 1684  | No | NA | 0  | 2 | Not-determined | Genome-fragment | NA |       | 0 |
| S1_extracted_k141_81763   | 1342  | No | NA | 0  | 1 | Not-determined | Genome-fragment | NA |       | 0 |
| S5_vs_k141_104079  H2gme  | 1460  | No | NA | 1  | 0 | Low-quality    | Genome-fragment | NA | 4.07  | 0 |
| S1_extracted_k141_118867  | 3269  | No | NA | 0  | 1 | Not-determined | Genome-fragment | NA |       | 0 |
| S1_extracted_k141_62357   | 3259  | No | NA | 0  | 1 | Not-determined | Genome-fragment | NA |       | 0 |
| S5_vs_k141_113275  H2gme  | 1460  | No | NA | 1  | 0 | Low-quality    | Genome-fragment | NA | 1.01  | 0 |
| S1_extracted_k141_148488  | 1183  | No | NA | 0  | 0 | Not-determined | Genome-fragment | NA |       | 0 |
| S1_extracted_k141_57012   | 1058  | No | NA | 0  | 1 | Not-determined | Genome-fragment | NA |       | 0 |
| S16_vs_62086  full        | 1460  | No | NA | 0  | 1 | Low-quality    | Genome-fragment | NA | 0.88  | 0 |
| S1_extracted_k141_103761  | 1542  | No | NA | 0  | 1 | Not-determined | Genome-fragment | NA |       | 0 |
| S16_vs_143001  full       | 1460  | No | NA | 0  | 1 | Low-quality    | Genome-fragment | NA | 2.99  | 0 |
| S10_vs_17376  H2gme       | 1460  | No | NA | 0  | 0 | Low-quality    | Genome-fragment | NA | 3.65  | 0 |
| S1_extracted_k141_43732   | 1607  | No | NA | 0  | 2 | Not-determined | Genome-fragment | NA |       | 0 |
| S1_extracted_k141_97169   | 4458  | No | NA | 0  | 0 | Not-determined | Genome-fragment | NA |       | 0 |
| S12_extracted_k141_47951  | 1460  | No | NA | 0  | 0 | Low-quality    | Genome-fragment | NA | 0.43  | 0 |
| S12_vs_k141_917  full     | 1460  | No | NA | 0  | 0 | Low-quality    | Genome-fragment | NA | 3.69  | 0 |
| S1_extracted_k141_43750   | 1158  | No | NA | 0  | 1 | Not-determined | Genome-fragment | NA |       | 0 |
| S12_vs_k141_146903  full  | 1460  | No | NA | 0  | 0 | Low-quality    | Genome-fragment | NA | 2.83  | 0 |
| S12_vs_k141_86205  full   | 1460  | No | NA | 0  | 1 | Low-quality    | Genome-fragment | NA | 2.28  | 0 |
| S1_extracted_k141_43755   | 1150  | No | NA | 0  | 1 | Not-determined | Genome-fragment | NA |       | 0 |
| S1_extracted_k141_80242   | 1243  | No | NA | 0  | 0 | Not-determined | Genome-fragment | NA |       | 0 |
| S8_vs_k141_157754  full   | 1460  | No | NA | 0  | 0 | Low-quality    | Genome-fragment | NA | 1.74  | 0 |
| S17_extracted_k141_76622  | 1461  | No | NA | 0  | 0 | Low-quality    | Genome-fragment | NA | 1.52  | 0 |
| S14_vs_k141_71691  full   | 1461  | No | NA | 0  | 1 | Low-quality    | Genome-fragment | NA | 0.39  | 0 |
| S3_extracted_k141_80188   | 1461  | No | NA | 0  | 0 | Low-quality    | Genome-fragment | NA |       | 0 |
| S3_extracted_k141_912     | 1461  | No | NA | 1  | 0 | Low-quality    | Genome-fragment | NA | 3.35  | 0 |
| S1_extracted_k141_97255   | 1022  | No | NA | 0  | 1 | Not-determined | Genome-fragment | NA |       | 0 |
| S1_extracted_k141_148545  | 1523  | No | NA | 0  | 1 | Not-determined | Genome-fragment | NA |       | 0 |
| S1_extracted_k141_110384  | 2237  | No | NA | 0  | 2 | Not-determined | Genome-fragment | NA |       | 0 |
| S1_extracted_k141_77132   | 4630  | No | NA | 0  | 1 | Not-determined | Genome-fragment | NA |       | 0 |
| S16_extracted_12181       | 1461  | No | NA | 0  | 0 | Low-quality    | Genome-fragment | NA | 2.42  | 0 |
| S1_extracted_k141_30421   | 1215  | No | NA | 0  | 0 | Not-determined | Genome-fragment | NA |       | 0 |
| S1_extracted_k141_155721  | 1001  | No | NA | 0  | 0 | Not-determined | Genome-fragment | NA |       | 0 |
| S1_extracted_k141_77142   | 1012  | No | NA | 0  | 2 | Not-determined | Genome-fragment | NA |       | 0 |
| S1_extracted_k141_103879  | 1181  | No | NA | 0  | 1 | Not-determined | Genome-fragment | NA |       | 0 |
| S1_extracted_k141_123597  | 1402  | No | NA | 0  | 0 | Not-determined | Genome-fragment | NA |       | 0 |
| S1_extracted_k141_10553   | 3606  | No | NA | 0  | 2 | Not-determined | Genome-fragment | NA |       | 0 |
| S1_extracted_k141_155727  | 3198  | No | NA | 0  | 1 | Not-determined | Genome-fragment | NA |       | 0 |
| S1_extracted_k141_23533   | 1046  | No | NA | 0  | 1 | Not-determined | Genome-fragment | NA |       | 0 |
| S1_extracted_k141_50591   | 21026 | No | NA | 13 | 0 | Medium-quality | Genome-fragment | NA | 54.77 | 0 |
| S1_extracted_k141_83910   | 1017  | No | NA |    |   |                |                 |    |       |   |



|                           |      |    |   |    |                |                    |      |   |
|---------------------------|------|----|---|----|----------------|--------------------|------|---|
| 57_vs_4211  H2gene        | 1462 | NA | 2 | 0  | Low-quality    | Genome-fragment    | 3.5  | 0 |
| 516_vs_81252  Hull        | 1462 | NA | 1 | 0  | Low-quality    | Genome-fragment    | 2.52 | 0 |
| 51_extracted_k141_17738   | 1089 | NA | 0 | 2  | Not-determined | Genome-fragment NA |      | 0 |
| 51_extracted_k141_123727  | 1190 | NA | 0 | 1  | Not-determined | Genome-fragment NA |      | 0 |
| 52_extracted_k141_814     | 1462 | NA | 3 | 0  | Low-quality    | Genome-fragment    | 4.82 | 0 |
| 51_extracted_k141_97528   | 2819 | NA | 0 | 1  | Not-determined | Genome-fragment NA |      | 0 |
| 58_extracted_k141_5234    | 1462 | NA | 0 | 1  | Low-quality    | Genome-fragment    | 0.73 | 0 |
| 51_extracted_k141_30690   | 1262 | NA | 0 | 1  | Not-determined | Genome-fragment NA |      | 0 |
| 51_extracted_k141_13720   | 3726 | NA | 0 | 0  | Not-determined | Genome-fragment NA |      | 0 |
| 51_extracted_k141_110651  | 1309 | NA | 0 | 1  | Not-determined | Genome-fragment NA |      | 0 |
| 51_extracted_k141_110652  | 1023 | NA | 0 | 1  | Not-determined | Genome-fragment NA |      | 0 |
| 51_extracted_k141_137369  | 1115 | NA | 0 | 1  | Not-determined | Genome-fragment NA |      | 0 |
| 58_extracted_k141_121484  | 1462 | NA | 0 | 0  | Low-quality    | Genome-fragment    | 3.48 | 0 |
| 58_vs_k141_57316  Hull    | 1462 | NA | 0 | 2  | Low-quality    | Genome-fragment    | 0.39 | 0 |
| 517_vs_k141_107707  Hull  | 1463 | NA | 0 | 0  | Low-quality    | Genome-fragment    | 1.88 | 0 |
| 59_vs_k141_77556  Hull    | 1463 | NA | 0 | 0  | Low-quality    | Genome-fragment    | 0.7  | 0 |
| 51_extracted_k141_57367   | 1357 | NA | 0 | 1  | Not-determined | Genome-fragment NA |      | 0 |
| 51_extracted_k141_90621   | 1224 | NA | 0 | 2  | Not-determined | Genome-fragment NA |      | 0 |
| 514_vs_k141_46055  Hull   | 1462 | NA | 0 | 0  | Low-quality    | Genome-fragment    | 2.45 | 0 |
| 51_extracted_k141_62742   | 1270 | NA | 0 | 1  | Not-determined | Genome-fragment NA |      | 0 |
| 514_vs_k141_11819  Hull   | 1463 | NA | 0 | 1  | Low-quality    | Genome-fragment    | 1.91 | 0 |
| 51_extracted_k141_116718  | 1463 | NA | 0 | 0  | Low-quality    | Genome-fragment    | 2.37 | 0 |
| 59_vs_k141_76750  Hull    | 1463 | NA | 2 | 0  | Low-quality    | Genome-fragment    | 3.23 | 0 |
| 53_vs_k141_93734  Hull    | 1463 | NA | 1 | 0  | Low-quality    | Genome-fragment    | 1.52 | 0 |
| 51_extracted_k141_143862  | 2154 | NA | 0 | 3  | Not-determined | Genome-fragment NA |      | 0 |
| 55_vs_k141_112100  Hull   | 1463 | NA | 0 | 1  | Low-quality    | Genome-fragment    | 0.98 | 0 |
| 51_extracted_k141_17871   | 1164 | NA | 0 | 0  | Not-determined | Genome-fragment NA |      | 0 |
| 51_extracted_k141_57459   | 1823 | NA | 0 | 2  | Not-determined | Genome-fragment NA |      | 0 |
| 51_extracted_k141_44184   | 1128 | NA | 0 | 1  | Not-determined | Genome-fragment NA |      | 0 |
| 51_extracted_k141_97644   | 1097 | NA | 0 | 1  | Not-determined | Genome-fragment NA |      | 0 |
| 51_extracted_k141_84213   | 1022 | NA | 0 | 1  | Not-determined | Genome-fragment NA |      | 0 |
| 55_vs_k141_29351  Hull    | 1463 | NA | 0 | 0  | Low-quality    | Genome-fragment    | 2.83 | 0 |
| 51_extracted_k141_137412  | 1337 | NA | 0 | 2  | Not-determined | Genome-fragment NA |      | 0 |
| 51_extracted_k141_57488   | 1135 | NA | 0 | 0  | Not-determined | Genome-fragment NA |      | 0 |
| 51_extracted_k141_110847  | 1816 | NA | 0 | 2  | Not-determined | Genome-fragment NA |      | 0 |
| 51_extracted_k141_30848   | 1442 | NA | 0 | 1  | Not-determined | Genome-fragment NA |      | 0 |
| 51_extracted_k141_62808   | 1089 | NA | 0 | 1  | Not-determined | Genome-fragment NA |      | 0 |
| 51_extracted_k141_143927  | 1929 | NA | 0 | 1  | Not-determined | Genome-fragment NA |      | 0 |
| 51_extracted_k141_104236  | 1517 | NA | 0 | 1  | Not-determined | Genome-fragment NA |      | 0 |
| 516_vs_140370  Hull       | 1463 | NA | 0 | 0  | Low-quality    | Genome-fragment    | 3.49 | 0 |
| 512_vs_k141_116997  Hull  | 1463 | NA | 1 | 0  | Low-quality    | Genome-fragment    | 3.29 | 0 |
| 51_extracted_k141_110883  | 3494 | NA | 0 | 1  | Not-determined | Genome-fragment NA |      | 0 |
| 51_extracted_k141_117635  | 1302 | NA | 0 | 1  | Not-determined | Genome-fragment NA |      | 0 |
| 51_extracted_k141_117647  | 1003 | NA | 0 | 2  | Not-determined | Genome-fragment NA |      | 0 |
| 56_vs_k141_25409  Hull    | 1463 | NA | 0 | 0  | Low-quality    | Genome-fragment    | 3.17 | 0 |
| 51_extracted_k141_90788   | 1299 | NA | 0 | 0  | Not-determined | Genome-fragment NA |      | 0 |
| 517_vs_k141_46016  Hull   | 1464 | NA | 0 | 0  | Low-quality    | Genome-fragment    | 2.85 | 0 |
| 51_extracted_k141_117689  | 1085 | NA | 0 | 1  | Not-determined | Genome-fragment NA |      | 0 |
| 59_extracted_k141_81591   | 1464 | NA | 0 | 0  | Low-quality    | Genome-fragment    | 3.6  | 0 |
| 59_vs_k141_61809  Hull    | 1464 | NA | 2 | 0  | Low-quality    | Genome-fragment    | 3.52 | 0 |
| 51_extracted_k141_62523   | 2083 | NA | 0 | 1  | Not-determined | Genome-fragment NA |      | 0 |
| 59_vs_k141_70343  Hull    | 1464 | NA | 0 | 0  | Low-quality    | Genome-fragment    | 4.18 | 0 |
| 51_extracted_k141_51122   | 1038 | NA | 0 | 2  | Not-determined | Genome-fragment NA |      | 0 |
| 51_extracted_k141_18041   | 1391 | NA | 0 | 0  | Not-determined | Genome-fragment NA |      | 0 |
| 51_extracted_k141_130965  | 2947 | NA | 0 | 1  | Not-determined | Genome-fragment NA |      | 0 |
| 51_extracted_k141_90882   | 1229 | NA | 0 | 0  | Not-determined | Genome-fragment NA |      | 0 |
| 51_extracted_k141_18056   | 1030 | NA | 0 | 1  | Not-determined | Genome-fragment NA |      | 0 |
| 51_extracted_k141_90858   | 1915 | NA | 0 | 1  | Not-determined | Genome-fragment NA |      | 0 |
| 51_extracted_k141_62954   | 1052 | NA | 0 | 0  | Not-determined | Genome-fragment NA |      | 0 |
| 51_extracted_k141_130991  | 1524 | NA | 0 | 4  | Not-determined | Genome-fragment NA |      | 0 |
| 51_extracted_k141_51145   | 1040 | NA | 0 | 1  | Not-determined | Genome-fragment NA |      | 0 |
| 51_extracted_k141_131012  | 1943 | NA | 0 | 1  | Not-determined | Genome-fragment NA |      | 0 |
| 51_extracted_k141_3369    | 1440 | NA | 0 | 1  | Not-determined | Genome-fragment NA |      | 0 |
| 51_extracted_k141_155941  | 1872 | NA | 0 | 1  | Not-determined | Genome-fragment NA |      | 0 |
| 513_vs_65333  H2gene      | 1464 | NA | 0 | 0  | Low-quality    | Genome-fragment    | 3.79 | 0 |
| 514_vs_k141_133071  Hull  | 1464 | NA | 1 | 0  | Low-quality    | Genome-fragment    | 3.7  | 0 |
| 51_extracted_k141_117780  | 1699 | NA | 0 | 2  | Not-determined | Genome-fragment NA |      | 0 |
| 514_vs_k141_78100  Hull   | 1464 | NA | 1 | 0  | Low-quality    | Genome-fragment    | 2.65 | 0 |
| 51_extracted_k141_57591   | 3064 | NA | 0 | 0  | Not-determined | Genome-fragment NA |      | 0 |
| 51_extracted_k141_31058   | 1016 | NA | 0 | 2  | Not-determined | Genome-fragment NA |      | 0 |
| 55_extracted_k141_61590   | 1464 | NA | 0 | 0  | Low-quality    | Genome-fragment    | 3.13 | 0 |
| 55_vs_k141_84600  Hull    | 1464 | NA | 0 | 0  | Low-quality    | Genome-fragment    | 1.99 | 0 |
| 57_vs_77082  Hull         | 1464 | NA | 0 | 2  | Low-quality    | Genome-fragment    | 0.79 | 0 |
| 516_vs_156482  Hull       | 1464 | NA | 1 | 0  | Low-quality    | Genome-fragment    | 3.1  | 0 |
| 51_extracted_k141_97869   | 1250 | NA | 0 | 1  | Not-determined | Genome-fragment NA |      | 0 |
| 51_extracted_k141_36772   | 3064 | NA | 0 | 2  | Not-determined | Genome-fragment NA |      | 0 |
| 512_vs_k141_73916  Hull   | 1464 | NA | 2 | 0  | Low-quality    | Genome-fragment    | 3.46 | 0 |
| 51_extracted_k141_90967   | 1619 | NA | 0 | 1  | Not-determined | Genome-fragment NA |      | 0 |
| 58_extracted_k141_145824  | 1464 | NA | 0 | 0  | Low-quality    | Genome-fragment    | 2.35 | 0 |
| 51_extracted_k141_36794   | 1005 | NA | 0 | 0  | Not-determined | Genome-fragment NA |      | 0 |
| 51_extracted_k141_104449  | 4635 | NA | 0 | 13 | Not-determined | Genome-fragment NA |      | 0 |
| 59_vs_k141_71021  Hull    | 1465 | NA | 0 | 0  | Low-quality    | Genome-fragment    | 3.32 | 0 |
| 51_extracted_k141_44479   | 1052 | NA | 0 | 1  | Not-determined | Genome-fragment NA |      | 0 |
| 51_extracted_k141_111091  | 1204 | NA | 0 | 1  | Not-determined | Genome-fragment NA |      | 0 |
| 51_extracted_k141_36840   | 1078 | NA | 0 | 2  | Not-determined | Genome-fragment NA |      | 0 |
| 51_extracted_k141_57667   | 2332 | NA | 0 | 1  | Not-determined | Genome-fragment NA |      | 0 |
| 51_extracted_k141_137696  | 1257 | NA | 0 | 2  | Not-determined | Genome-fragment NA |      | 0 |
| 51_extracted_k141_31125   | 1041 | NA | 0 | 2  | Not-determined | Genome-fragment NA |      | 0 |
| 51_extracted_k141_44512   | 2608 | NA | 0 | 0  | Not-determined | Genome-fragment NA |      | 0 |
| 51_extracted_k141_31142   | 3297 | NA | 0 | 0  | Not-determined | Genome-fragment NA |      | 0 |
| 51_extracted_k141_77822   | 1114 | NA | 0 | 0  | Not-determined | Genome-fragment NA |      | 0 |
| 51_extracted_k141_51325   | 1143 | NA | 0 | 0  | Not-determined | Genome-fragment NA |      | 0 |
| 51_extracted_k141_117889  | 1162 | NA | 0 | 1  | Not-determined | Genome-fragment NA |      | 0 |
| 51_extracted_k141_104531  | 1974 | NA | 0 | 0  | Not-determined | Genome-fragment NA |      | 0 |
| 51_extracted_k141_51368   | 1185 | NA | 0 | 0  | Not-determined | Genome-fragment NA |      | 0 |
| 51_extracted_k141_131203  | 1000 | NA | 0 | 2  | Not-determined | Genome-fragment NA |      | 0 |
| 51_extracted_k141_91099   | 1320 | NA | 0 | 0  | Not-determined | Genome-fragment NA |      | 0 |
| 51_extracted_k141_131220  | 1912 | NA | 0 | 3  | Not-determined | Genome-fragment NA |      | 0 |
| 511_vs_k141_76120  Hull   | 1465 | NA | 0 | 0  | Low-quality    | Genome-fragment    | 3.68 | 0 |
| 51_extracted_k141_97996   | 1365 | NA | 0 | 1  | Not-determined | Genome-fragment NA |      | 0 |
| 51_extracted_k141_70551   | 1803 | NA | 0 | 0  | Not-determined | Genome-fragment NA |      | 0 |
| 51_extracted_k141_70556   | 1273 | NA | 0 | 0  | Not-determined | Genome-fragment NA |      | 0 |
| 51_extracted_k141_18319   | 1045 | NA | 0 | 0  | Not-determined | Genome-fragment NA |      | 0 |
| 51_extracted_k141_36973   | 1016 | NA | 0 | 0  | Not-determined | Genome-fragment NA |      | 0 |
| 51_extracted_k141_18346   | 1098 | NA | 0 | 1  | Not-determined | Genome-fragment NA |      | 0 |
| 51_extracted_k141_63229   | 1806 | NA | 0 | 1  | Not-determined | Genome-fragment NA |      | 0 |
| 51_extracted_k141_70620   | 2137 | NA | 0 | 2  | Not-determined | Genome-fragment NA |      | 0 |
| 53_extracted_k141_91295   | 1465 | NA | 0 | 1  | Low-quality    | Genome-fragment    | 0.25 | 0 |
| 51_extracted_k141_44663   | 1338 | NA | 0 | 0  | Not-determined | Genome-fragment NA |      | 0 |
| 51_extracted_k141_137886  | 1106 | NA | 0 | 0  | Not-determined | Genome-fragment NA |      | 0 |
| 51_extracted_k141_31334   | 2089 | NA | 0 | 1  | Not-determined | Genome-fragment NA |      | 0 |
| 51_extracted_k141_84663   | 1473 | NA | 0 | 1  | Not-determined | Genome-fragment NA |      | 0 |
| 51_extracted_k141_63260   | 2783 | NA | 0 | 1  | Not-determined | Genome-fragment NA |      | 0 |
| 51_extracted_k141_104674  | 1239 | NA | 0 | 1  | Not-determined | Genome-fragment NA |      | 0 |
| 53_extracted_k141_47223   | 1465 | NA | 0 | 0  | Low-quality    | Genome-fragment    | 0.25 | 0 |
| 55_extracted_k141_45943   | 1465 | NA | 2 | 0  | Low-quality    | Genome-fragment    | 3.41 | 0 |
| 51_extracted_k141_51544   | 1038 | NA | 0 | 0  | Not-determined | Genome-fragment NA |      | 0 |
| 51_extracted_k141_118045  | 3160 | NA | 0 | 1  | Not-determined | Genome-fragment NA |      | 0 |
| 51_extracted_k141_24400   | 1051 | NA | 0 | 0  | Not-determined | Genome-fragment NA |      | 0 |
| 55_vs_k141_34232  H2gene  | 1465 | NA | 2 | 0  | Low-quality    | Genome-fragment    | 3.1  | 0 |
| 51_extracted_k141_3648    | 1244 | NA | 0 | 1  | Not-determined | Genome-fragment NA |      | 0 |
| 51_extracted_k141_137881  | 1453 | NA | 0 | 1  | Not-determined | Genome-fragment NA |      | 0 |
| 51_extracted_k141_124386  | 1550 | NA | 0 | 1  | Not-determined | Genome-fragment NA |      | 0 |
| 51_extracted_k141_137997  | 1842 | NA | 0 | 1  | Not-determined | Genome-fragment NA |      | 0 |
| 51_extracted_k141_111336  | 1210 | NA | 0 | 1  | Not-determined | Genome-fragment NA |      | 0 |
| 51_extracted_k141_78107   | 1087 | NA | 0 | 1  | Not-determined | Genome-fragment NA |      | 0 |
| 57_vs_105216  Hull        | 1465 | NA | 0 | 1  | Low-quality    | Genome-fragment    | 2.1  | 0 |
| 51_extracted_k141_148981  | 1468 | NA | 0 | 0  | Not-determined | Genome-fragment NA |      | 0 |
| 516_vs_49373  Hull        | 1465 | NA | 0 | 0  | Low-quality    | Genome-fragment    | 3.02 | 0 |
| 51_extracted_k141_138042  | 3214 | NA | 0 | 1  | Not-determined | Genome-fragment NA |      | 0 |
| 51_extracted_k141_91354   | 1385 | NA | 0 | 0  | Not-determined | Genome-fragment NA |      | 0 |
| 51_extracted_k141_118183  | 2051 | NA | 0 | 1  | Not-determined | Genome-fragment NA |      | 0 |
| 510_vs_52443  Hull        | 1465 | NA | 2 | 0  | Low-quality    | Genome-fragment    | 3.45 | 0 |
| 51_extracted_k141_58053   | 1428 | NA | 0 | 0  | Not-determined | Genome-fragment NA |      | 0 |
| 51_extracted_k141_111439  | 3365 | NA | 0 | 0  | Not-determined | Genome-fragment NA |      | 0 |
| 51_extracted_k141_51683   | 2151 | NA | 0 | 3  | Not-determined | Genome-fragment NA |      | 0 |
| 51_extracted_k141_78185   | 1262 | NA | 0 | 1  | Not-determined | Genome-fragment NA |      | 0 |
| 510_vs_62939  Hull        | 1465 | NA | 1 | 0  | Low-quality    | Genome-fragment    | 4.67 | 0 |
| 51_extracted_k141_84840   | 7118 | NA | 0 | 3  | Not-determined | Genome-fragment NA |      | 0 |
| 51_extracted_k141_24596   | 1332 | NA | 0 | 2  | Not-determined | Genome-fragment NA |      | 0 |
| 512_vs_k141_19554  Hull   | 1465 | NA | 0 | 0  | Low-quality    | Genome-fragment    | 4.08 | 0 |
| 51_extracted_k141_149006  | 1183 | NA | 0 | 0  | Not-determined | Genome-fragment NA |      | 0 |
| 515_vs_33688  H2gene      | 1465 | NA | 2 | 0  | Low-quality    | Genome-fragment    | 3.32 | 0 |
| 58_extracted_k141_52322   | 1465 | NA | 0 | 1  | Low-quality    | Genome-fragment    | 0.37 | 0 |
| 51_extracted_k141_98311   | 1229 | NA | 0 | 0  | Not-determined | Genome-fragment NA |      | 0 |
| 58_vs_k141_140236  H2gene | 1465 | NA | 1 | 0  | Low-quality    | Genome-fragment    | 3.78 | 0 |
| 51_extracted_k141_149033  | 1471 | NA | 0 | 1  | Not-determined | Genome-fragment NA |      | 0 |
| 511_extracted_k141_48520  | 1466 | NA | 0 | 0  | Not-determined | Genome-fragment NA |      | 0 |
| 51_extracted_k141_149037  | 1222 | NA | 0 | 2  | Not-determined | Genome-fragment NA |      | 0 |
| 51_extracted_k141_78265   | 1006 | NA | 0 | 1  | Not-determined | Genome-fragment NA |      | 0 |
| 51_extracted_k141_111757  | 1007 | NA | 0 | 1  | Not-determined | Genome-fragment NA |      | 0 |
| 511_vs_k141_165971  Hull  | 1466 | NA | 0 | 1  | Low-quality    | Genome-fragment    | 3.92 | 0 |
| 51_extracted_k141_111574  | 6376 | NA | 0 | 4  | Not-determined | Genome-fragment NA |      | 0 |
| 51_extracted_k141_156225  | 3056 | NA |   |    |                |                    |      |   |



|                          |      |    |    |   |   |                |                 |    |      |
|--------------------------|------|----|----|---|---|----------------|-----------------|----|------|
| S1_extracted_k141_78388  | 1448 | No | NA | 0 | 1 | Not-determined | Genome-fragment | NA | 0    |
| S1_extracted_k141_149159 | 1612 | No | NA | 0 | 0 | Not-determined | Genome-fragment | NA | 0    |
| S1_extracted_k141_37327  | 1003 | No | NA | 0 | 0 | Not-determined | Genome-fragment | NA | 0    |
| S3_extracted_k141_4270   | 1466 | No | NA | 2 | 0 | Low-quality    | Genome-fragment | NA | 3.21 |
| S1_extracted_k141_11934  | 1319 | No | NA | 0 | 0 | Not-determined | Genome-fragment | NA | 0    |
| S1_extracted_k141_3072   | 1211 | No | NA | 0 | 1 | Not-determined | Genome-fragment | NA | 0    |
| S5_vs_k141_2111 full     | 1466 | No | NA | 0 | 1 | Low-quality    | Genome-fragment | NA | 0.76 |
| S5_vs_k141_2572 full     | 1466 | No | NA | 0 | 1 | Low-quality    | Genome-fragment | NA | 0.44 |
| S1_extracted_k141_31728  | 1294 | No | NA | 0 | 0 | Not-determined | Genome-fragment | NA | 0    |
| S1_extracted_k141_85104  | 1270 | No | NA | 0 | 1 | Not-determined | Genome-fragment | NA | 0    |
| S15_extracted_66367      | 1466 | No | NA | 0 | 0 | Low-quality    | Genome-fragment | NA | 2.38 |
| S1_extracted_k141_118488 | 1121 | No | NA | 0 | 1 | Not-determined | Genome-fragment | NA | 0    |
| S1_extracted_k141_144809 | 1124 | No | NA | 0 | 1 | Not-determined | Genome-fragment | NA | 0    |
| S1_extracted_k141_61804  | 1369 | No | NA | 0 | 1 | Not-determined | Genome-fragment | NA | 0    |
| S1_extracted_k141_24941  | 1063 | No | NA | 0 | 2 | Not-determined | Genome-fragment | NA | 0    |
| S1_extracted_k141_50024  | 3853 | No | NA | 0 | 0 | Not-determined | Genome-fragment | NA | 0    |
| S1_extracted_k141_78538  | 1126 | No | NA | 0 | 3 | Not-determined | Genome-fragment | NA | 0    |
| S1_extracted_k141_18971  | 3369 | No | NA | 0 | 1 | Not-determined | Genome-fragment | NA | 0    |
| S1_extracted_k141_50038  | 1189 | No | NA | 0 | 0 | Not-determined | Genome-fragment | NA | 0    |
| S1_extracted_k141_52049  | 2445 | No | NA | 0 | 2 | Not-determined | Genome-fragment | NA | 0    |
| S1_extracted_k141_58419  | 1028 | No | NA | 0 | 1 | Not-determined | Genome-fragment | NA | 0    |
| S1_extracted_k141_149320 | 2043 | No | NA | 0 | 1 | Not-determined | Genome-fragment | NA | 0    |
| S1_extracted_k141_24978  | 1473 | No | NA | 0 | 0 | Not-determined | Genome-fragment | NA | 0    |
| S6_extracted_k141_51308  | 1466 | No | NA | 0 | 0 | Low-quality    | Genome-fragment | NA | 2.47 |
| S1_extracted_k141_11848  | 2320 | No | NA | 0 | 1 | Not-determined | Genome-fragment | NA | 0    |
| S1_extracted_k141_31822  | 1453 | No | NA | 0 | 2 | Not-determined | Genome-fragment | NA | 0    |
| S1_extracted_k141_58440  | 3443 | No | NA | 0 | 0 | Not-determined | Genome-fragment | NA | 0    |
| S1_extracted_k141_52080  | 1271 | No | NA | 0 | 1 | Not-determined | Genome-fragment | NA | 0    |
| S1_extracted_k141_11831  | 1089 | No | NA | 0 | 1 | Not-determined | Genome-fragment | NA | 0    |
| S1_extracted_k141_12072  | 1642 | No | NA | 0 | 1 | Not-determined | Genome-fragment | NA | 0    |
| S8_vs_k141_118428 H2gene | 1466 | No | NA | 1 | 0 | Low-quality    | Genome-fragment | NA | 1.92 |
| S17_vs_k141_127606 full  | 1467 | No | NA | 0 | 0 | Low-quality    | Genome-fragment | NA | 2.52 |
| S1_extracted_k141_144915 | 1163 | No | NA | 0 | 0 | Not-determined | Genome-fragment | NA | 0    |
| S1_extracted_k141_111996 | 1370 | No | NA | 0 | 0 | Not-determined | Genome-fragment | NA | 0    |
| S1_extracted_k141_91890  | 1170 | No | NA | 0 | 1 | Not-determined | Genome-fragment | NA | 0    |
| S14_extracted_k141_47220 | 1467 | No | NA | 0 | 1 | Low-quality    | Genome-fragment | NA | 4.84 |
| S1_extracted_k141_4143   | 1762 | No | NA | 0 | 1 | Not-determined | Genome-fragment | NA | 0    |
| S5_vs_k141_107933 full   | 1467 | No | NA | 0 | 1 | Low-quality    | Genome-fragment | NA | 0.68 |
| S7_vs_45690 full         | 1467 | No | NA | 0 | 0 | Low-quality    | Genome-fragment | NA | 2.19 |
| S1_extracted_k141_25064  | 1077 | No | NA | 0 | 1 | Not-determined | Genome-fragment | NA | 0    |
| S12_vs_k141_95655 full   | 1467 | No | NA | 3 | 0 | Low-quality    | Genome-fragment | NA | 1.96 |
| S1_extracted_k141_98744  | 2898 | No | NA | 0 | 0 | Not-determined | Genome-fragment | NA | 2.14 |
| S12_vs_k141_1479 full    | 1467 | No | NA | 2 | 0 | Low-quality    | Genome-fragment | NA | 4.04 |
| S1_extracted_k141_85261  | 2813 | No | NA | 0 | 1 | Not-determined | Genome-fragment | NA | 0    |
| S1_extracted_k141_115915 | 3872 | No | NA | 0 | 3 | Not-determined | Genome-fragment | NA | 0    |
| S1_extracted_k141_37501  | 1577 | No | NA | 0 | 0 | Not-determined | Genome-fragment | NA | 0    |
| S12_vs_k141_69563 full   | 1467 | No | NA | 0 | 1 | Low-quality    | Genome-fragment | NA | 4.68 |
| S9_vs_k141_7464 full     | 1468 | No | NA | 2 | 0 | Low-quality    | Genome-fragment | NA | 1.97 |
| S1_extracted_k141_118666 | 2738 | No | NA | 0 | 1 | Not-determined | Genome-fragment | NA | 0    |
| S1_extracted_k141_105361 | 1851 | No | NA | 0 | 1 | Not-determined | Genome-fragment | NA | 0    |
| S14_vs_k141_112128 full  | 1468 | No | NA | 0 | 0 | Low-quality    | Genome-fragment | NA | 3.18 |
| S1_extracted_k141_95967  | 1468 | No | NA | 0 | 0 | Low-quality    | Genome-fragment | NA | 2.14 |
| S7_extracted_22000       | 1468 | No | NA | 0 | 0 | Low-quality    | Genome-fragment | NA | 2.81 |
| S1_extracted_k141_25122  | 3073 | No | NA | 0 | 1 | Not-determined | Genome-fragment | NA | 0    |
| S1_extracted_k141_138480 | 2185 | No | NA | 0 | 3 | Not-determined | Genome-fragment | NA | 0    |
| S1_extracted_k141_31845  | 1295 | No | NA | 0 | 0 | Not-determined | Genome-fragment | NA | 0    |
| S1_extracted_k141_105397 | 1481 | No | NA | 0 | 1 | Not-determined | Genome-fragment | NA | 0    |
| S15_vs_10888 full        | 1468 | No | NA | 0 | 0 | Low-quality    | Genome-fragment | NA | 3.73 |
| S1_extracted_k141_98804  | 1771 | No | NA | 0 | 0 | Not-determined | Genome-fragment | NA | 0    |
| S17_vs_k141_151310 full  | 1469 | No | NA | 1 | 0 | Low-quality    | Genome-fragment | NA | 3.36 |
| S17_vs_k141_139415 full  | 1469 | No | NA | 0 | 2 | Low-quality    | Genome-fragment | NA | 2.83 |
| S1_extracted_k141_11221  | 1317 | No | NA | 0 | 1 | Not-determined | Genome-fragment | NA | 0    |
| S1_extracted_k141_31977  | 1114 | No | NA | 0 | 1 | Not-determined | Genome-fragment | NA | 0    |
| S1_extracted_k141_118712 | 1090 | No | NA | 0 | 0 | Not-determined | Genome-fragment | NA | 0    |
| S1_extracted_k141_17050  | 1719 | No | NA | 1 | 1 | Not-determined | Genome-fragment | NA | 0    |
| S14_vs_k141_56044 full   | 1469 | No | NA | 0 | 1 | Low-quality    | Genome-fragment | NA | 2.77 |
| S8_extracted_k141_139205 | 1469 | No | NA | 0 | 1 | Low-quality    | Genome-fragment | NA | 1.67 |
| S1_extracted_k141_145030 | 3512 | No | NA | 0 | 3 | Not-determined | Genome-fragment | NA | 0    |
| S1_extracted_k141_118515 | 1189 | No | NA | 0 | 1 | Not-determined | Genome-fragment | NA | 0    |
| S1_extracted_k141_45421  | 1921 | No | NA | 0 | 0 | Not-determined | Genome-fragment | NA | 0    |
| S1_extracted_k141_32015  | 1011 | No | NA | 0 | 1 | Not-determined | Genome-fragment | NA | 0    |
| S1_extracted_k141_112256 | 1717 | No | NA | 0 | 1 | Not-determined | Genome-fragment | NA | 0    |
| S8_vs_k141_122457 full   | 1469 | No | NA | 0 | 0 | Low-quality    | Genome-fragment | NA | 3.08 |
| S1_extracted_k141_118757 | 1287 | No | NA | 0 | 1 | Not-determined | Genome-fragment | NA | 0    |
| S8_vs_k141_112621 full   | 1469 | No | NA | 0 | 1 | Low-quality    | Genome-fragment | NA | 0.44 |
| S9_vs_k141_4865 full     | 1470 | No | NA | 2 | 0 | Low-quality    | Genome-fragment | NA | 3.19 |
| S1_extracted_k141_118575 | 1233 | No | NA | 0 | 0 | Not-determined | Genome-fragment | NA | 0    |
| S1_extracted_k141_32063  | 1184 | No | NA | 0 | 0 | Not-determined | Genome-fragment | NA | 0    |
| S1_extracted_k141_118771 | 1145 | No | NA | 0 | 0 | Not-determined | Genome-fragment | NA | 0    |
| S1_extracted_k141_92082  | 1053 | No | NA | 0 | 0 | Not-determined | Genome-fragment | NA | 0    |
| S1_extracted_k141_58684  | 1077 | No | NA | 0 | 2 | Not-determined | Genome-fragment | NA | 0    |
| S11_extracted_k141_68320 | 1470 | No | NA | 0 | 0 | Low-quality    | Genome-fragment | NA | 7.08 |
| S1_extracted_k141_118591 | 3067 | No | NA | 0 | 5 | Not-determined | Genome-fragment | NA | 0    |
| S13_vs_34708 full        | 1470 | No | NA | 1 | 0 | Low-quality    | Genome-fragment | NA | 2.51 |
| S1_extracted_k141_145085 | 1262 | No | NA | 0 | 2 | Not-determined | Genome-fragment | NA | 0    |
| S1_extracted_k141_98878  | 1408 | No | NA | 0 | 0 | Not-determined | Genome-fragment | NA | 0    |
| S13_vs_27970 H2gene      | 1470 | No | NA | 0 | 1 | Low-quality    | Genome-fragment | NA | 3.34 |
| S1_extracted_k141_112099 | 1096 | No | NA | 0 | 0 | Not-determined | Genome-fragment | NA | 0    |
| S3_extracted_k141_26089  | 1470 | No | NA | 0 | 1 | Low-quality    | Genome-fragment | NA | 0.74 |
| S3_vs_k141_19681 full    | 1470 | No | NA | 0 | 0 | Low-quality    | Genome-fragment | NA | 1.87 |
| S10_extracted_11536      | 1470 | No | NA | 1 | 0 | Low-quality    | Genome-fragment | NA | 1.35 |
| S1_extracted_k141_32157  | 1096 | No | NA | 0 | 1 | Not-determined | Genome-fragment | NA | 0    |
| S10_vs_28643 H2gene      | 1470 | No | NA | 1 | 0 | Low-quality    | Genome-fragment | NA | 3.3  |
| S1_extracted_k141_112378 | 1481 | No | NA | 0 | 1 | Not-determined | Genome-fragment | NA | 0    |
| S12_extracted_k141_17581 | 1470 | No | NA | 0 | 1 | Low-quality    | Genome-fragment | NA | 2.84 |
| S1_extracted_k141_12406  | 1172 | No | NA | 0 | 0 | Not-determined | Genome-fragment | NA | 0    |
| S15_extracted_60755      | 1470 | No | NA | 0 | 1 | Low-quality    | Genome-fragment | NA | 4.15 |
| S1_extracted_k141_112147 | 5829 | No | NA | 0 | 2 | Not-determined | Genome-fragment | NA | 0    |
| S1_extracted_k141_118807 | 3887 | No | NA | 0 | 2 | Not-determined | Genome-fragment | NA | 0    |
| S1_extracted_k141_32211  | 1201 | No | NA | 0 | 1 | Not-determined | Genome-fragment | NA | 0    |
| S1_extracted_k141_37651  | 1590 | No | NA | 0 | 1 | Not-determined | Genome-fragment | NA | 0    |
| S6_vs_k141_27310 full    | 1470 | No | NA | 0 | 0 | Low-quality    | Genome-fragment | NA | 3.66 |
| S8_vs_k141_81071 full    | 1470 | No | NA | 1 | 0 | Low-quality    | Genome-fragment | NA | 2.44 |
| S1_extracted_k141_105605 | 2271 | No | NA | 0 | 1 | Not-determined | Genome-fragment | NA | 0    |
| S1_extracted_k141_39022  | 1046 | No | NA | 0 | 0 | Not-determined | Genome-fragment | NA | 0    |
| S17_vs_k141_68115 full   | 1471 | No | NA | 0 | 0 | Low-quality    | Genome-fragment | NA | 3.26 |
| S1_extracted_k141_156493 | 1540 | No | NA | 0 | 1 | Not-determined | Genome-fragment | NA | 0    |
| S1_extracted_k141_155313 | 1401 | No | NA | 0 | 1 | Not-determined | Genome-fragment | NA | 0    |
| S1_extracted_k141_145230 | 1616 | No | NA | 0 | 1 | Not-determined | Genome-fragment | NA | 0    |
| S1_extracted_k141_25397  | 1599 | No | NA | 0 | 1 | Not-determined | Genome-fragment | NA | 2.37 |
| S3_vs_k141_8743 full     | 1471 | No | NA | 0 | 2 | Low-quality    | Genome-fragment | NA | 0    |
| S1_extracted_k141_115321 | 1733 | No | NA | 0 | 1 | Not-determined | Genome-fragment | NA | 0    |
| S1_extracted_k141_45665  | 4349 | No | NA | 0 | 2 | Not-determined | Genome-fragment | NA | 0    |
| S1_extracted_k141_138728 | 1261 | No | NA | 0 | 0 | Not-determined | Genome-fragment | NA | 2.51 |
| S12_vs_k141_186800 full  | 1471 | No | NA | 0 | 0 | Low-quality    | Genome-fragment | NA | 0    |
| S1_extracted_k141_64357  | 1262 | No | NA | 0 | 1 | Not-determined | Genome-fragment | NA | 0    |
| S1_extracted_k141_112259 | 1228 | No | NA | 0 | 1 | Not-determined | Genome-fragment | NA | 0    |
| S1_extracted_k141_156547 | 1098 | No | NA | 0 | 1 | Not-determined | Genome-fragment | NA | 0    |
| S1_extracted_k141_99107  | 1624 | No | NA | 0 | 0 | Not-determined | Genome-fragment | NA | 0    |
| S1_extracted_k141_32343  | 1591 | No | NA | 0 | 2 | Not-determined | Genome-fragment | NA | 0    |
| S1_extracted_k141_112396 | 1062 | No | NA | 0 | 1 | Not-determined | Genome-fragment | NA | 0    |
| S1_extracted_k141_25490  | 2578 | No | NA | 0 | 0 | Not-determined | Genome-fragment | NA | 0    |
| S1_extracted_k141_45764  | 3065 | No | NA | 0 | 1 | Not-determined | Genome-fragment | NA | 0    |
| S1_extracted_k141_19520  | 1508 | No | NA | 0 | 1 | Not-determined | Genome-fragment | NA | 0    |
| S1_extracted_k141_119050 | 3912 | No | NA | 0 | 0 | Not-determined | Genome-fragment | NA | 0    |
| S1_extracted_k141_92360  | 1143 | No | NA | 0 | 1 | Not-determined | Genome-fragment | NA | 0    |
| S6_extracted_k141_53314  | 1471 | No | NA | 2 | 0 | Low-quality    | Genome-fragment | NA | 3.52 |
| S8_vs_k141_185530 full   | 1471 | No | NA | 0 | 0 | Low-quality    | Genome-fragment | NA | 4.4  |
| S1_extracted_k141_81794  | 1007 | No | NA | 0 | 1 | Not-determined | Genome-fragment | NA | 0    |
| S1_extracted_k141_19545  | 1698 | No | NA | 0 | 1 | Not-determined | Genome-fragment | NA | 3.06 |
| S17_vs_k141_122245 full  | 1472 | No | NA | 0 | 0 | Low-quality    | Genome-fragment | NA | 0    |
| S1_extracted_k141_112466 | 1155 | No | NA | 0 | 0 | Not-determined | Genome-fragment | NA | 3.25 |
| S9_vs_k141_73597 full    | 1472 | No | NA | 2 | 0 | Low-quality    | Genome-fragment | NA | 3.99 |
| S9_vs_k141_7024 full     | 1472 | No | NA | 0 | 0 | Low-quality    | Genome-fragment | NA | 3.99 |
| S1_extracted_k141_118858 | 1518 | No | NA | 0 | 1 | Not-determined | Genome-fragment | NA | 0    |
| S3_vs_k141_52680 full    | 1472 | No | NA | 0 | 0 | Low-quality    | Genome-fragment | NA | 3.91 |
| S1_extracted_k141_32448  | 1707 | No | NA | 0 | 1 | Not-determined | Genome-fragment | NA | 0    |
| S1_extracted_k141_112384 | 3998 | No | NA | 0 | 3 | Not-determined | Genome-fragment | NA | 2.32 |
| S5_extracted_k141_44642  | 1472 | No | NA | 0 | 0 | Low-quality    | Genome-fragment | NA | 0    |
| S1_extracted_k141_112526 | 1232 | No | NA | 0 | 0 | Not-determined | Genome-fragment | NA | 1.44 |
| S7_vs_39421 full         | 1472 | No | NA | 0 | 0 | Low-quality    | Genome-fragment | NA | 2.52 |
| S7_vs_45690 H2gene       | 1472 | No | NA | 2 | 0 | Low-quality    | Genome-fragment | NA | 0    |
| S1_extracted_k141_119127 | 3274 | No | NA | 0 | 3 | Not-determined | Genome-fragment | NA | 0    |
| S1_extracted_k141_145408 | 2024 | No | NA | 0 | 0 | Not-determined | Genome-fragment | NA | 0    |
| S1_extracted_k141_20593  | 1004 | No | NA | 0 | 1 | Not-determined | Genome-fragment | NA | 0    |
| S1_extracted_k141_19     |      |    |    |   |   |                |                 |    |      |



|                            |       |    |    |   |   |                |                 |       |   |
|----------------------------|-------|----|----|---|---|----------------|-----------------|-------|---|
| S10_vs_50093  full         | 1473  | No | NA | 2 | 0 | Low-quality    | Genome-fragment | 3.12  | 0 |
| S1_extracted_k141_145531   | 1193  | No | NA | 0 | 0 | Not-determined | Genome-fragment | NA    | 0 |
| S12_vs_k141_15170  full    | 1473  | No | NA | 2 | 0 | Low-quality    | Genome-fragment | 2.47  | 0 |
| S1_extracted_k141_64620    | 4153  | No | NA | 0 | 2 | Not-determined | Genome-fragment | NA    | 0 |
| S1_extracted_k141_12788    | 1162  | No | NA | 0 | 1 | Not-determined | Genome-fragment | NA    | 0 |
| S1_extracted_k141_32637    | 1249  | No | NA | 0 | 0 | Not-determined | Genome-fragment | NA    | 0 |
| S6_vs_k141_232  full       | 1473  | No | NA | 1 | 0 | Low-quality    | Genome-fragment | 1.2   | 0 |
| S1_extracted_k141_125650   | 7776  | No | NA | 3 | 0 | Medium-quality | Genome-fragment | 56.76 | 0 |
| S1_extracted_k141_45982    | 4311  | No | NA | 0 | 0 | Not-determined | Genome-fragment | NA    | 0 |
| S8_vs_k141_138713  full    | 1473  | No | NA | 0 | 1 | Low-quality    | Genome-fragment | 1.68  | 0 |
| S1_extracted_k141_125673   | 1087  | No | NA | 0 | 1 | Not-determined | Genome-fragment | NA    | 0 |
| S1_extracted_k141_25789    | 1266  | No | NA | 0 | 0 | Not-determined | Genome-fragment | NA    | 0 |
| S1_extracted_k141_79459    | 1160  | No | NA | 0 | 1 | Not-determined | Genome-fragment | NA    | 0 |
| S13_extracted_10330        | 1474  | No | NA | 0 | 0 | Low-quality    | Genome-fragment | 2.29  | 0 |
| S1_extracted_k141_125709   | 1135  | No | NA | 0 | 1 | Not-determined | Genome-fragment | NA    | 0 |
| S1_extracted_k141_25824    | 1282  | No | NA | 0 | 2 | Not-determined | Genome-fragment | NA    | 0 |
| S14_extracted_k141_67335   | 1474  | No | NA | 5 | 0 | Low-quality    | Genome-fragment | 4.86  | 0 |
| S14_vs_k141_104719  full   | 1474  | No | NA | 1 | 0 | Low-quality    | Genome-fragment | 3.16  | 0 |
| S1_extracted_k141_149707   | 2212  | No | NA | 1 | 0 | Not-determined | Genome-fragment | NA    | 0 |
| S1_extracted_k141_132812   | 1078  | No | NA | 0 | 0 | Not-determined | Genome-fragment | NA    | 0 |
| S1_extracted_k141_12899    | 4211  | No | NA | 0 | 4 | Not-determined | Genome-fragment | NA    | 0 |
| S1_extracted_k141_25839    | 5226  | No | NA | 0 | 2 | Not-determined | Genome-fragment | NA    | 0 |
| S3_extracted_k141_64850    | 1474  | No | NA | 3 | 0 | Low-quality    | Genome-fragment | 6.73  | 0 |
| S1_extracted_k141_106095   | 1024  | No | NA | 0 | 2 | Not-determined | Genome-fragment | NA    | 0 |
| S1_extracted_k141_112623   | 1511  | No | NA | 0 | 1 | Not-determined | Genome-fragment | NA    | 0 |
| S3_vs_k141_3031  H2gene    | 1474  | No | NA | 1 | 0 | Low-quality    | Genome-fragment | 2.7   | 0 |
| S1_extracted_k141_4747     | 3279  | No | NA | 0 | 1 | Not-determined | Genome-fragment | NA    | 0 |
| S1_extracted_k141_125782   | 1013  | No | NA | 0 | 1 | Not-determined | Genome-fragment | NA    | 0 |
| S1_extracted_k141_50346    | 13067 | No | NA | 0 | 1 | Not-determined | Genome-fragment | NA    | 0 |
| S1_extracted_k141_59355    | 1764  | No | NA | 0 | 1 | Not-determined | Genome-fragment | NA    | 0 |
| S1_extracted_k141_149767   | 1687  | No | NA | 0 | 1 | Not-determined | Genome-fragment | NA    | 0 |
| S5_extracted_k141_97240    | 1474  | No | NA | 3 | 0 | Low-quality    | Genome-fragment | 3.64  | 0 |
| S1_extracted_k141_99531    | 1155  | No | NA | 0 | 0 | Not-determined | Genome-fragment | NA    | 0 |
| S7_extracted_55836         | 1474  | No | NA | 0 | 0 | Low-quality    | Genome-fragment | 0.88  | 0 |
| S1_extracted_k141_125817   | 2090  | No | NA | 0 | 0 | Not-determined | Genome-fragment | NA    | 0 |
| S1_extracted_k141_38111    | 3055  | No | NA | 0 | 0 | Not-determined | Genome-fragment | NA    | 0 |
| S1_extracted_k141_32810    | 1164  | No | NA | 0 | 1 | Not-determined | Genome-fragment | NA    | 0 |
| S7_vs_111300  full         | 1474  | No | NA | 1 | 0 | Low-quality    | Genome-fragment | 3.65  | 0 |
| S7_vs_116651  H2gene       | 1474  | No | NA | 0 | 0 | Low-quality    | Genome-fragment | 3.11  | 0 |
| S1_extracted_k141_149820   | 1006  | No | NA | 0 | 1 | Not-determined | Genome-fragment | NA    | 0 |
| S1_extracted_k141_64810    | 1048  | No | NA | 0 | 1 | Not-determined | Genome-fragment | NA    | 0 |
| S1_extracted_k141_145746   | 1306  | No | NA | 0 | 1 | Not-determined | Genome-fragment | NA    | 0 |
| S16_vs_88343  full         | 1474  | No | NA | 0 | 0 | Low-quality    | Genome-fragment | 2.38  | 0 |
| S12_vs_k141_185295  full   | 1474  | No | NA | 2 | 0 | Low-quality    | Genome-fragment | 3.39  | 0 |
| S1_extracted_k141_125961   | 1122  | No | NA | 0 | 0 | Not-determined | Genome-fragment | NA    | 0 |
| S12_vs_k141_174182  H2gene | 1474  | No | NA | 0 | 0 | Low-quality    | Genome-fragment | 1.38  | 0 |
| S6_vs_k141_1103  H2gene    | 1474  | No | NA | 0 | 0 | Low-quality    | Genome-fragment | 3.76  | 0 |
| S1_extracted_k141_59434    | 5371  | No | NA | 0 | 5 | Not-determined | Genome-fragment | NA    | 0 |
| S8_extracted_k141_175401   | 1474  | No | NA | 0 | 0 | Low-quality    | Genome-fragment | 1.45  | 0 |
| S1_extracted_k141_149859   | 2142  | No | NA | 0 | 0 | Not-determined | Genome-fragment | NA    | 0 |
| S1_extracted_k141_59437    | 3184  | No | NA | 0 | 2 | Not-determined | Genome-fragment | NA    | 0 |
| S1_extracted_k141_4026     | 7257  | No | NA | 0 | 5 | Not-determined | Genome-fragment | NA    | 0 |
| S1_extracted_k141_112757   | 1198  | No | NA | 0 | 0 | Not-determined | Genome-fragment | NA    | 0 |
| S1_extracted_k141_79650    | 1228  | No | NA | 0 | 1 | Not-determined | Genome-fragment | NA    | 0 |
| S1_extracted_k141_106216   | 2004  | No | NA | 0 | 1 | Not-determined | Genome-fragment | NA    | 0 |
| S1_extracted_k141_106282   | 1636  | No | NA | 0 | 0 | Not-determined | Genome-fragment | NA    | 0 |
| S1_extracted_k141_112790   | 1240  | No | NA | 0 | 1 | Not-determined | Genome-fragment | NA    | 0 |
| S8_vs_k141_157306  full    | 1474  | No | NA | 0 | 0 | Low-quality    | Genome-fragment | 0.88  | 0 |
| S17_extracted_k141_43609   | 1475  | No | NA | 0 | 0 | Low-quality    | Genome-fragment | 2.02  | 0 |
| S14_vs_k141_33111  full    | 1475  | No | NA | 0 | 0 | Low-quality    | Genome-fragment | 4.25  | 0 |
| S1_extracted_k141_88445    | 1475  | No | NA | 0 | 0 | Low-quality    | Genome-fragment | 3.67  | 0 |
| S1_vs_k141_104661  full    | 1475  | No | NA | 0 | 0 | Low-quality    | Genome-fragment | 1.99  | 0 |
| S1_extracted_k141_53184    | 1363  | No | NA | 0 | 1 | Not-determined | Genome-fragment | NA    | 0 |
| S1_extracted_k141_92898    | 1016  | No | NA | 0 | 1 | Not-determined | Genome-fragment | NA    | 0 |
| S1_extracted_k141_144935   | 3263  | No | NA | 0 | 0 | Not-determined | Genome-fragment | NA    | 0 |
| S1_extracted_k141_26069    | 1060  | No | NA | 0 | 0 | Not-determined | Genome-fragment | NA    | 0 |
| S1_extracted_k141_4907     | 1302  | No | NA | 0 | 1 | Not-determined | Genome-fragment | NA    | 0 |
| NC1_vs_k141_2039           | 1475  | No | NA | 0 | 0 | Low-quality    | Genome-fragment | 2.13  | 0 |
| S10_vs_51875  full         | 1475  | No | NA | 2 | 0 | Low-quality    | Genome-fragment | 2.05  | 0 |
| S1_extracted_k141_38247    | 1019  | No | NA | 0 | 1 | Not-determined | Genome-fragment | NA    | 0 |
| S12_vs_k141_12437  full    | 1475  | No | NA | 1 | 0 | Low-quality    | Genome-fragment | 2.63  | 0 |
| S12_vs_k141_108751  full   | 1475  | No | NA | 0 | 0 | Low-quality    | Genome-fragment | 1.14  | 0 |
| S13_vs_63037  full         | 1476  | No | NA | 0 | 0 | Low-quality    | Genome-fragment | 2.31  | 0 |
| S1_vs_k141_155816  full    | 1476  | No | NA | 0 | 0 | Low-quality    | Genome-fragment | 1.84  | 0 |
| S1_extracted_k141_11244    | 1058  | No | NA | 0 | 0 | Not-determined | Genome-fragment | NA    | 0 |
| S1_extracted_k141_106403   | 1036  | No | NA | 0 | 1 | Not-determined | Genome-fragment | NA    | 0 |
| S1_extracted_k141_51299    | 3656  | No | NA | 0 | 1 | Not-determined | Genome-fragment | NA    | 0 |
| S1_extracted_k141_119691   | 1602  | No | NA | 0 | 2 | Not-determined | Genome-fragment | NA    | 0 |
| S5_extracted_k141_4794     | 1476  | No | NA | 0 | 0 | Low-quality    | Genome-fragment | 0.85  | 0 |
| S1_extracted_k141_65027    | 1005  | No | NA | 0 | 0 | Not-determined | Genome-fragment | NA    | 0 |
| NC1_vs_k141_1196           | 1476  | No | NA | 0 | 0 | Low-quality    | Genome-fragment | 3.25  | 0 |
| S16_extracted_9466         | 1476  | No | NA | 0 | 0 | Low-quality    | Genome-fragment | 3.46  | 0 |
| S16_extracted_92050        | 1476  | No | NA | 0 | 0 | Low-quality    | Genome-fragment | 1.02  | 0 |
| S16_vs_17158  full         | 1476  | No | NA | 1 | 0 | Low-quality    | Genome-fragment | 2.35  | 0 |
| S16_vs_171000  full        | 1476  | No | NA | 0 | 0 | Low-quality    | Genome-fragment | 3.03  | 0 |
| S1_extracted_k141_86477    | 2201  | No | NA | 0 | 0 | Not-determined | Genome-fragment | NA    | 0 |
| S1_extracted_k141_13349    | 1874  | No | NA | 0 | 2 | Not-determined | Genome-fragment | NA    | 0 |
| S1_extracted_k141_95050    | 1517  | No | NA | 0 | 2 | Not-determined | Genome-fragment | NA    | 0 |
| S15_extracted_23528        | 1476  | No | NA | 0 | 0 | Low-quality    | Genome-fragment | 3.23  | 0 |
| S8_extracted_k141_75832    | 1476  | No | NA | 0 | 1 | Low-quality    | Genome-fragment | 4.71  | 0 |
| S1_extracted_k141_26259    | 1434  | No | NA | 0 | 1 | Not-determined | Genome-fragment | NA    | 0 |
| S1_extracted_k141_145951   | 1553  | No | NA | 0 | 0 | Not-determined | Genome-fragment | NA    | 0 |
| S1_extracted_k141_126200   | 1056  | No | NA | 0 | 0 | Not-determined | Genome-fragment | NA    | 0 |
| S17_extracted_k141_12828   | 1477  | No | NA | 1 | 0 | Low-quality    | Genome-fragment | 2.45  | 0 |
| S11_extracted_k141_58278   | 1477  | No | NA | 1 | 0 | Low-quality    | Genome-fragment | 3.1   | 0 |
| S11_vs_k141_34288  full    | 1477  | No | NA | 1 | 0 | Low-quality    | Genome-fragment | 4.47  | 0 |
| S11_vs_k141_14637  H2gene  | 1477  | No | NA | 1 | 0 | Low-quality    | Genome-fragment | 1.38  | 0 |
| S11_vs_k141_43555  H2gene  | 1477  | No | NA | 2 | 0 | Low-quality    | Genome-fragment | 3.83  | 0 |
| S14_extracted_k141_12778   | 1477  | No | NA | 0 | 0 | Low-quality    | Genome-fragment | 4.94  | 0 |
| S1_extracted_k141_126210   | 5383  | No | NA | 0 | 2 | Not-determined | Genome-fragment | NA    | 0 |
| S1_extracted_k141_26305    | 1079  | No | NA | 0 | 0 | Not-determined | Genome-fragment | NA    | 0 |
| S1_extracted_k141_113331   | 1211  | No | NA | 0 | 0 | Not-determined | Genome-fragment | NA    | 0 |
| S1_extracted_k141_139654   | 1683  | No | NA | 0 | 1 | Not-determined | Genome-fragment | NA    | 0 |
| S1_extracted_k141_38425    | 1135  | No | NA | 0 | 1 | Not-determined | Genome-fragment | NA    | 0 |
| S1_extracted_k141_139660   | 1307  | No | NA | 0 | 0 | Not-determined | Genome-fragment | NA    | 0 |
| S1_extracted_k141_133352   | 5618  | No | NA | 0 | 3 | Not-determined | Genome-fragment | NA    | 0 |
| S1_extracted_k141_106579   | 1436  | No | NA | 0 | 1 | Not-determined | Genome-fragment | NA    | 0 |
| S1_vs_k141_13841  full     | 1477  | No | NA | 0 | 0 | Low-quality    | Genome-fragment | 1.6   | 0 |
| S16_vs_133993  full        | 1477  | No | NA | 0 | 0 | Low-quality    | Genome-fragment | 3.37  | 0 |
| S1_extracted_k141_139681   | 1530  | No | NA | 0 | 1 | Not-determined | Genome-fragment | NA    | 0 |
| S1_extracted_k141_13287    | 1549  | No | NA | 0 | 0 | Not-determined | Genome-fragment | NA    | 0 |
| S1_extracted_k141_91201    | 1013  | No | NA | 0 | 0 | Not-determined | Genome-fragment | NA    | 0 |
| S1_extracted_k141_133393   | 1320  | No | NA | 0 | 1 | Not-determined | Genome-fragment | NA    | 0 |
| S1_extracted_k141_65246    | 1248  | No | NA | 0 | 1 | Not-determined | Genome-fragment | NA    | 0 |
| S1_extracted_k141_26382    | 1283  | No | NA | 0 | 1 | Not-determined | Genome-fragment | NA    | 0 |
| S1_extracted_k141_139732   | 3395  | No | NA | 0 | 1 | Not-determined | Genome-fragment | NA    | 0 |
| S10_vs_96347  full         | 1477  | No | NA | 1 | 0 | Low-quality    | Genome-fragment | 3.97  | 0 |
| S12_vs_k141_134939  full   | 1477  | No | NA | 0 | 0 | Low-quality    | Genome-fragment | 2.81  | 0 |
| S1_extracted_k141_91270    | 1139  | No | NA | 0 | 0 | Not-determined | Genome-fragment | NA    | 0 |
| S6_vs_k141_1983  full      | 1477  | No | NA | 0 | 1 | Low-quality    | Genome-fragment | 2.74  | 0 |
| S1_extracted_k141_119936   | 1044  | No | NA | 0 | 1 | Not-determined | Genome-fragment | NA    | 0 |
| S1_extracted_k141_65312    | 4007  | No | NA | 0 | 2 | Not-determined | Genome-fragment | NA    | 0 |
| S1_extracted_k141_146146   | 3672  | No | NA | 0 | 3 | Not-determined | Genome-fragment | NA    | 0 |
| S8_extracted_k141_106940   | 1477  | No | NA | 1 | 0 | Low-quality    | Genome-fragment | 2.52  | 0 |
| S1_extracted_k141_116373   | 2315  | No | NA | 2 | 0 | Not-determined | Genome-fragment | NA    | 0 |
| S1_extracted_k141_38561    | 1082  | No | NA | 0 | 1 | Not-determined | Genome-fragment | NA    | 0 |
| S1_extracted_k141_63352    | 1088  | No | NA | 0 | 0 | Not-determined | Genome-fragment | NA    | 0 |
| S1_extracted_k141_193975   | 1105  | No | NA | 0 | 1 | Not-determined | Genome-fragment | NA    | 0 |
| S1_extracted_k141_63356    | 1188  | No | NA | 0 | 0 | Not-determined | Genome-fragment | NA    | 0 |
| S8_extracted_k141_187194   | 1477  | No | NA | 0 | 1 | Low-quality    | Genome-fragment | 2.33  | 0 |
| S1_extracted_k141_93383    | 2476  | No | NA | 0 | 1 | Not-determined | Genome-fragment | NA    | 0 |
| S1_extracted_k141_71832    | 1243  | No | NA | 0 | 1 | Not-determined | Genome-fragment | NA    | 0 |
| S1_extracted_k141_113310   | 1328  | No | NA | 0 | 1 | Not-determined | Genome-fragment | NA    | 0 |
| S8_vs_k141_113793  full    | 1477  | No | NA | 0 | 1 | Low-quality    | Genome-fragment | 3.17  | 0 |
| S1_extracted_k141_146170   | 1046  | No | NA | 0 | 1 | Not-determined | Genome-fragment | NA    | 0 |
| S1_extracted_k141_113321   | 1198  | No | NA | 0 | 0 | Not-determined | Genome-fragment | NA    | 0 |
| S11_vs_k141_60028  full    | 1478  | No | NA | 0 | 1 | Low-quality    | Genome-fragment | 2.07  | 0 |
| S1_extracted_k141_116385   | 1104  | No | NA | 0 | 1 | Not-determined | Genome-fragment | NA    | 0 |
| S1_extracted_k141_120021   | 1503  | No | NA | 0 | 3 | Not-determined | Genome-fragment | NA    | 0 |
| S14_vs_k141_62586  full    | 1478  | No | NA | 1 | 0 | Low-quality    | Genome-fragment | 3.87  | 0 |
| S1_extracted_k141_130035   | 1992  | No | NA | 0 | 1 | Not-determined | Genome-fragment | NA    | 0 |
| S14_vs_k141_125071  full   | 1478  | No | NA | 0 | 0 | Low-quality    | Genome-fragment | 2.48  | 0 |
| S1_extracted_k141_150116   | 2244  | No | NA | 0 | 0 | Not-determined | Genome-fragment | NA    | 0 |
| S1_extracted_k141_26545    | 1144  | No | NA | 0 | 0 | Not-determined | Genome-fragment | NA    | 0 |
| S1_extracted_k141_150124   | 1002  | No | NA | 0 | 0 | Not-determined | Genome-fragment | NA    | 0 |



|                           |          |        |     |      |    |   |                |                 |       |       |
|---------------------------|----------|--------|-----|------|----|---|----------------|-----------------|-------|-------|
| S3_vs_k141_1073871        | [full]   | 1479   | No  | NA   | 0  | 0 | Low-quality    | Genome-fragment | 1.22  | 0     |
| S1_extracted_k141_20177   |          | 1116   | No  | NA   | 0  | 1 | Not-determined | Genome-fragment | NA    | 0     |
| S1_extracted_k141_66296   |          | 3090   | No  | NA   | 0  | 0 | Not-determined | Genome-fragment | NA    | 0     |
| S1_extracted_k141_5947    |          | 1703   | No  | NA   | 0  | 0 | Not-determined | Genome-fragment | NA    | 0     |
| S3_vs_k141_498681         | [H2gene] | 1479   | No  | NA   | 2  | 0 | Low-quality    | Genome-fragment | 4.4   | 0     |
| S1_extracted_k141_66370   |          | 1148   | No  | NA   | 0  | 0 | Not-determined | Genome-fragment | NA    | 0     |
| S1_extracted_k141_39238   |          | 1177   | No  | NA   | 0  | 0 | Not-determined | Genome-fragment | NA    | 0     |
| S16_vs_723461             | [full]   | 1479   | No  | NA   | 1  | 0 | Low-quality    | Genome-fragment | 3.75  | 0     |
| S10_vs_492411             | [full]   | 1479   | No  | NA   | 0  | 0 | Low-quality    | Genome-fragment | 4.25  | 0     |
| S10_vs_492671             | [full]   | 1479   | No  | NA   | 0  | 0 | Low-quality    | Genome-fragment | 3.59  | 0     |
| S1_extracted_k141_6216    |          | 1304   | No  | NA   | 0  | 1 | Not-determined | Genome-fragment | NA    | 0     |
| S1_extracted_k141_66633   |          | 1193   | No  | NA   | 0  | 1 | Not-determined | Genome-fragment | NA    | 0     |
| S1_extracted_k141_6231    |          | 1352   | No  | NA   | 0  | 1 | Not-determined | Genome-fragment | NA    | 0     |
| S8_vs_k141_1417701        | [full]   | 1479   | No  | NA   | 0  | 0 | Low-quality    | Genome-fragment | 2.51  | 0     |
| S9_vs_k141_45781          | [full]   | 1480   | No  | NA   | 2  | 0 | Low-quality    | Genome-fragment | 2.93  | 0     |
| S1_extracted_k141_6272    |          | 40918  | No  | NA   | 16 | 0 | Complete       | High-quality    | 100   | 0     |
| S1_extracted_k141_6300    |          | 1029   | No  | NA   | 0  | 0 | Not-determined | Genome-fragment | NA    | 0     |
| S1_extracted_k141_157693  |          | 1013   | No  | NA   | 0  | 1 | Not-determined | Genome-fragment | NA    | 0     |
| S13_vs_k141_742331        | [H2gene] | 1480   | No  | NA   | 1  | 0 | Low-quality    | Genome-fragment | 2.98  | 0     |
| S13_vs_1209151            | [full]   | 1480   | No  | NA   | 1  | 0 | Low-quality    | Genome-fragment | 0.43  | 0     |
| S1_extracted_k141_157715  |          | 1588   | No  | NA   | 0  | 1 | Not-determined | Genome-fragment | NA    | 0     |
| S14_extracted_k141_88403  |          | 1480   | No  | NA   | 3  | 0 | Low-quality    | Genome-fragment | 4.87  | 0     |
| S1_extracted_k141_157816  |          | 1418   | No  | NA   | 0  | 1 | Not-determined | Genome-fragment | NA    | 0     |
| S1_extracted_k141_6472    |          | 1116   | No  | NA   | 0  | 1 | Not-determined | Genome-fragment | NA    | 0     |
| S1_extracted_k141_39736   |          | 3754   | No  | NA   | 0  | 3 | Not-determined | Genome-fragment | NA    | 0     |
| S14_extracted_k141_5082   |          | 1480   | No  | NA   | 3  | 0 | Low-quality    | Genome-fragment | 3.86  | 0     |
| S1_extracted_k141_6578    |          | 1163   | No  | NA   | 0  | 0 | Not-determined | Genome-fragment | NA    | 0     |
| S1_extracted_k141_75902   |          | 1110   | No  | NA   | 0  | 1 | Not-determined | Genome-fragment | NA    | 0     |
| S14_vs_k141_442111        | [full]   | 1480   | No  | NA   | 0  | 1 | Low-quality    | Genome-fragment | 2.09  | 0     |
| S1_extracted_k141_39854   |          | 1415   | No  | NA   | 0  | 0 | Not-determined | Genome-fragment | NA    | 0     |
| S14_vs_k141_673181        | [full]   | 1480   | No  | NA   | 0  | 0 | Low-quality    | Genome-fragment | 3.07  | 0     |
| S1_extracted_k141_150750  |          | 1891   | No  | NA   | 0  | 1 | Not-determined | Genome-fragment | NA    | 0     |
| S1_extracted_k141_158015  |          | 1208   | No  | NA   | 0  | 1 | Not-determined | Genome-fragment | NA    | 0     |
| S1_extracted_k141_158033  |          | 1365   | No  | NA   | 0  | 1 | Not-determined | Genome-fragment | NA    | 0     |
| S1_extracted_k141_158087  |          | 1056   | No  | NA   | 0  | 1 | Not-determined | Genome-fragment | NA    | 0     |
| S1_vs_k141_771551         | [full]   | 1480   | No  | NA   | 0  | 1 | Low-quality    | Genome-fragment | 2.15  | 0     |
| S9_extracted_k141_28089   |          | 1480   | No  | NA   | 1  | 0 | Low-quality    | Genome-fragment | 2.53  | 0     |
| S5_vs_k141_121761         | [full]   | 1480   | No  | NA   | 0  | 0 | Low-quality    | Genome-fragment | 3.72  | 0     |
| S1_extracted_k141_73094   |          | 1015   | No  | NA   | 1  | 1 | Not-determined | Genome-fragment | NA    | 0     |
| S1_extracted_k141_73097   |          | 1006   | No  | NA   | 0  | 2 | Not-determined | Genome-fragment | NA    | 0     |
| S16_vs_86091              | [full]   | 1480   | No  | NA   | 0  | 0 | Low-quality    | Genome-fragment | 1.8   | 0     |
| S12_vs_k141_1522661       | [full]   | 1480   | No  | NA   | 0  | 0 | Low-quality    | Genome-fragment | 2.45  | 0     |
| S6_vs_k141_228661         | [full]   | 1480   | No  | NA   | 0  | 1 | Low-quality    | Genome-fragment | 2.67  | 0     |
| S1_extracted_k141_73188   |          | 1116   | No  | NA   | 0  | 2 | Not-determined | Genome-fragment | NA    | 0     |
| S1_extracted_k141_151027  |          | 1028   | No  | NA   | 0  | 0 | Not-determined | Genome-fragment | NA    | 0     |
| S1_extracted_k141_158420  |          | 1486   | No  | NA   | 0  | 0 | Not-determined | Genome-fragment | NA    | 0     |
| S1_extracted_k141_158462  |          | 1015   | No  | NA   | 0  | 0 | Not-determined | Genome-fragment | NA    | 0     |
| S1_extracted_k141_151183  |          | 5309   | No  | NA   | 0  | 1 | Not-determined | Genome-fragment | NA    | 0     |
| S1_extracted_k141_151250  |          | 1557   | No  | NA   | 0  | 1 | Not-determined | Genome-fragment | NA    | 0     |
| S1_extracted_k141_158603  |          | 2164   | No  | NA   | 0  | 2 | Not-determined | Genome-fragment | NA    | 0     |
| S13_extracted_147516      |          | 1481   | No  | NA   | 1  | 0 | Low-quality    | Genome-fragment | 3.67  | 0     |
| S2_extracted_k141_41236   |          | 1481   | No  | NA   | 2  | 0 | Low-quality    | Genome-fragment | 2.82  | 0     |
| S1_extracted_k141_151391  |          | 1101   | No  | NA   | 0  | 1 | Not-determined | Genome-fragment | NA    | 0     |
| S1_extracted_k141_158693  |          | 2030   | No  | NA   | 0  | 1 | Not-determined | Genome-fragment | NA    | 0     |
| S1_extracted_k141_151485  |          | 1031   | No  | NA   | 0  | 1 | Not-determined | Genome-fragment | NA    | 0     |
| S3_vs_k141_363981         | [full]   | 1481   | No  | NA   | 0  | 0 | Low-quality    | Genome-fragment | 2.05  | 0     |
| S1_extracted_k141_158890  |          | 1566   | No  | NA   | 0  | 1 | Not-determined | Genome-fragment | NA    | 0     |
| S1_extracted_k141_151678  |          | 1227   | No  | NA   | 0  | 0 | Not-determined | Genome-fragment | NA    | 0     |
| S5_extracted_k141_20871   |          | 1481   | No  | NA   | 0  | 0 | Low-quality    | Genome-fragment | 0.92  | 0     |
| S7_vs_636351              | [full]   | 1481   | No  | NA   | 0  | 1 | Low-quality    | Genome-fragment | 4.73  | 0     |
| S1_extracted_k141_151780  |          | 2082   | No  | NA   | 0  | 2 | Not-determined | Genome-fragment | NA    | 0     |
| S1_extracted_k141_158961  |          | 43312  | No  | NA   | 1  | 1 | Medium-quality | Genome-fragment | 80.9  | 0     |
| S1_extracted_k141_158985  |          | 2752   | No  | NA   | 0  | 1 | Not-determined | Genome-fragment | NA    | 0     |
| S1_extracted_k141_159144  |          | 1157   | No  | NA   | 0  | 2 | Not-determined | Genome-fragment | NA    | 0     |
| S16_extracted_64876       |          | 1481   | No  | NA   | 0  | 1 | Low-quality    | Genome-fragment | 0.86  | 0     |
| S1_extracted_k141_152189  |          | 2109   | No  | NA   | 0  | 2 | Not-determined | Genome-fragment | NA    | 0     |
| S10_extracted_34939       |          | 1481   | No  | NA   | 0  | 1 | Low-quality    | Genome-fragment | 3.98  | 0     |
| S1_extracted_k141_159322  |          | 1771   | No  | NA   | 0  | 1 | Not-determined | Genome-fragment | NA    | 0     |
| S1_extracted_k141_159329  |          | 1177   | No  | NA   | 0  | 0 | Not-determined | Genome-fragment | NA    | 0     |
| S1_extracted_k141_159479  |          | 1036   | No  | NA   | 0  | 2 | Not-determined | Genome-fragment | NA    | 0     |
| S1_extracted_k141_159524  |          | 1279   | No  | NA   | 0  | 1 | Not-determined | Genome-fragment | NA    | 0     |
| S1_extracted_k141_15954   |          | 1948   | No  | NA   | 0  | 0 | Not-determined | Genome-fragment | NA    | 0     |
| S12_extracted_k141_40887  |          | 1481   | No  | NA   | 0  | 2 | Low-quality    | Genome-fragment | 3.22  | 0     |
| S1_extracted_k141_152496  |          | 1277   | No  | NA   | 0  | 1 | Not-determined | Genome-fragment | NA    | 0     |
| S1_extracted_k141_159589  |          | 6712   | No  | NA   | 0  | 1 | Not-determined | Genome-fragment | NA    | 0     |
| S1_extracted_k141_159657  |          | 1097   | No  | NA   | 0  | 1 | Not-determined | Genome-fragment | NA    | 0     |
| S15_vs_282801             | [full]   | 1481   | No  | NA   | 0  | 0 | Low-quality    | Genome-fragment | 3.3   | 0     |
| S8_extracted_k141_92549   |          | 1481   | No  | NA   | 0  | 0 | Low-quality    | Genome-fragment | 1.64  | 0     |
| S1_extracted_k141_159785  |          | 1446   | No  | NA   | 0  | 1 | Not-determined | Genome-fragment | NA    | 0     |
| S1_extracted_k141_159839  |          | 1037   | No  | NA   | 0  | 0 | Not-determined | Genome-fragment | NA    | 0     |
| S8_vs_k141_20541          | [full]   | 1481   | No  | NA   | 0  | 0 | Low-quality    | Genome-fragment | 2.73  | 0     |
| S1_extracted_k141_1513109 |          | 7731   | No  | NA   | 0  | 6 | Not-determined | Genome-fragment | NA    | 0     |
| S14_vs_k141_511061        | [full]   | 1482   | No  | NA   | 0  | 1 | Low-quality    | Genome-fragment | 0.79  | 0     |
| S1_extracted_k141_159951  |          | 101988 | No  | NA   | 17 | 3 | Complete       | High-quality    | 100   | 0     |
| S1_extracted_k141_1513389 |          | 1685   | No  | NA   | 0  | 0 | Not-determined | Genome-fragment | NA    | 0     |
| S1_extracted_k141_153230  |          | 1017   | No  | NA   | 0  | 1 | Not-determined | Genome-fragment | NA    | 0     |
| S1_extracted_k141_153237  |          | 1147   | No  | NA   | 0  | 0 | Not-determined | Genome-fragment | NA    | 0     |
| S1_extracted_k141_153397  |          | 1027   | No  | NA   | 0  | 2 | Not-determined | Genome-fragment | NA    | 0     |
| S1_extracted_k141_153500  |          | 2617   | No  | NA   | 0  | 1 | Not-determined | Genome-fragment | NA    | 0     |
| S1_vs_k141_1439291        | [full]   | 39654  | No  | NA   | 14 | 1 | High-quality   | High-quality    | 94.85 | 0     |
| S1_vs_k141_667511         | [full]   | 1760   | No  | NA   | 0  | 0 | Not-determined | Genome-fragment | NA    | 0     |
| S1_vs_k141_801141         | [full]   | 1352   | No  | NA   | 0  | 2 | Not-determined | Genome-fragment | NA    | 0     |
| S1_extracted_k141_131875  |          | 1482   | No  | NA   | 1  | 0 | Low-quality    | Genome-fragment | 1.85  | 0     |
| S1_vs_k141_1468581        | [full]   | 3656   | No  | NA   | 0  | 3 | Not-determined | Genome-fragment | NA    | 0     |
| S3_extracted_k141_26917   |          | 1482   | No  | NA   | 0  | 0 | Low-quality    | Genome-fragment | 2.55  | 0     |
| S1_vs_k141_334031         | [full]   | 1012   | No  | NA   | 0  | 0 | Not-determined | Genome-fragment | NA    | 0     |
| S3_extracted_k141_28999   |          | 1482   | No  | NA   | 0  | 1 | Low-quality    | Genome-fragment | 0.91  | 0     |
| S5_vs_k141_748541         | [full]   | 1482   | No  | NA   | 1  | 2 | Low-quality    | Genome-fragment | 0.24  | 0     |
| S7_vs_200411              | [full]   | 1482   | No  | NA   | 0  | 2 | Low-quality    | Genome-fragment | 0.47  | 0     |
| S7_vs_1333151             | [full]   | 1482   | No  | NA   | 0  | 0 | Low-quality    | Genome-fragment | 3.31  | 0     |
| S1_vs_k141_868081         | [full]   | 1517   | No  | NA   | 0  | 0 | Not-determined | Genome-fragment | NA    | 0     |
| S1_vs_k141_167231         | [full]   | 1304   | No  | NA   | 0  | 1 | Not-determined | Genome-fragment | NA    | 0     |
| S1_vs_k141_1335441        | [full]   | 1951   | No  | NA   | 0  | 2 | Not-determined | Genome-fragment | NA    | 0     |
| S1_vs_k141_744491         | [full]   | 4289   | No  | NA   | 0  | 4 | Not-determined | Genome-fragment | NA    | 0     |
| S1_vs_k141_200641         | [full]   | 6319   | No  | NA   | 0  | 5 | Not-determined | Genome-fragment | NA    | 0     |
| S16_vs_611331             | [full]   | 1482   | No  | NA   | 0  | 0 | Low-quality    | Genome-fragment | 2.46  | 0     |
| S1_vs_k141_1135151        | [full]   | 2691   | No  | NA   | 0  | 1 | Not-determined | Genome-fragment | NA    | 0     |
| S1_vs_k141_1202001        | [full]   | 2133   | No  | NA   | 0  | 1 | Not-determined | Genome-fragment | NA    | 0     |
| S16_vs_1218851            | [full]   | 1482   | No  | NA   | 0  | 0 | Low-quality    | Genome-fragment | 3.23  | 0     |
| S16_vs_1464591            | [full]   | 1482   | No  | NA   | 0  | 0 | Low-quality    | Genome-fragment | 1.3   | 0     |
| S10_vs_38971              | [full]   | 1482   | Yes | 999  | 1  | 1 | Low-quality    | Genome-fragment | 0.69  | 32.59 |
| S12_extracted_k141_138885 |          | 1482   | No  | NA   | 0  | 0 | Low-quality    | Genome-fragment | 1.06  | 0     |
| S12_extracted_k141_140828 |          | 1482   | No  | NA   | 0  | 1 | Low-quality    | Genome-fragment | 0.27  | 0     |
| S12_extracted_k141_124648 |          | 1482   | No  | NA   | 1  | 0 | Low-quality    | Genome-fragment | 1.7   | 0     |
| S1_vs_k141_1101           | [full]   | 2157   | No  | NA   | 0  | 2 | Not-determined | Genome-fragment | NA    | 0     |
| S1_vs_k141_868591         | [full]   | 1715   | No  | NA   | 0  | 3 | Not-determined | Genome-fragment | NA    | 0     |
| S1_vs_k141_668321         | [full]   | 1189   | No  | NA   | 0  | 1 | Not-determined | Genome-fragment | NA    | 0     |
| S8_vs_k141_567511         | [full]   | 1482   | No  | NA   | 0  | 0 | Low-quality    | Genome-fragment | NA    | 1.37  |
| S1_vs_k141_668371         | [full]   | 4083   | No  | NA   | 0  | 0 | Not-determined | Genome-fragment | NA    | 0     |
| S17_vs_k141_444791        | [full]   | 1483   | No  | NA   | 0  | 1 | Low-quality    | Genome-fragment | 3.6   | 0     |
| S1_extracted_k141_755231  | [full]   | 2343   | No  | NA   | 0  | 2 | Not-determined | Genome-fragment | NA    | 0     |
| S1_extracted_k141_156374  |          | 1483   | Yes | 1048 | 1  | 0 | Low-quality    | Genome-fragment | 3.29  | 25.33 |
| S1_vs_k141_468371         | [full]   | 2070   | No  | NA   | 0  | 2 | Not-determined | Genome-fragment | NA    | 0     |
| S1_vs_k141_1403061        | [full]   | 2429   | No  | NA   | 0  | 3 | Not-determined | Genome-fragment | NA    | 0     |
| S1_vs_k141_802451         | [full]   | 2171   | No  | NA   | 0  | 2 | Not-determined | Genome-fragment | NA    | 0     |
| S1_vs_k141_1335771        | [full]   | 37683  | No  | NA   | 17 | 1 | High-quality   | High-quality    | 97.57 | 0     |
| S1_vs_k141_755421         | [full]   | 1200   | No  | NA   | 0  | 1 | Not-determined | Genome-fragment | NA    | 0     |
| S7_vs_367931              | [H2gene] | 1483   | No  | NA   | 0  | 0 | Low-quality    | Genome-fragment | 3.59  | 0     |
| S1_vs_k141_802731         | [full]   | 1471   | No  | NA   | 0  | 2 | Not-determined | Genome-fragment | NA    | 0     |
| S1_vs_k141_1136341        | [full]   | 1099   | No  | NA   | 0  | 0 | Not-determined | Genome-fragment | NA    | 0     |
| S15_extracted_11555       |          | 1483   | No  | NA   | 0  | 2 | Low-quality    | Genome-fragment | 0.67  | 0     |
| S4_vs_VHServe_11688-ext_3 |          | 1483   | No  | NA   | 1  | 0 | Low-quality    | Genome-fragment | 3.83  | 0     |
| S6_vs_k141_367981         | [full]   | 1483   | No  | NA   | 0  | 0 | Low-quality    | Genome-fragment | 4.69  | 0     |
| S17_vs_k141_1513261       | [full]   | 1484   | No  | NA   | 1  | 0 | Low-quality    | Genome-fragment | 2.8   | 0     |
| S1_vs_k141_1041           | [full]   | 1044   | No  | NA   | 0  | 0 | Not-determined | Genome-fragment | NA    | 0     |
| S17_vs_k141_1243121       | [full]   | 1484   | No  | NA   | 0  | 2 | Low-quality    | Genome-fragment | 0.81  | 0     |
| S17_vs_k141_213951        | [full]   | 1484   | No  | NA   | 2  | 0 | Low-quality    | Genome-fragment | 3.46  | 0     |
| S1_vs_k141_202571         | [full]   | 3067   | No  |      |    |   |                |                 |       |       |



|                           |       |    |    |   |   |                |                 |      |   |
|---------------------------|-------|----|----|---|---|----------------|-----------------|------|---|
| S1_vs_k141_31655  full    | 1486  | No | NA | 0 | 0 | Low-quality    | Genome-fragment | 2.98 | 0 |
| S3_vs_k141_46246  i2gene  | 1486  | No | NA | 1 | 0 | Low-quality    | Genome-fragment | 1.03 | 0 |
| S5_extracted_k141_80626   | 1486  | No | NA | 0 | 0 | Low-quality    | Genome-fragment | 3.52 | 0 |
| S1_vs_k141_47170  full    | 1260  | No | NA | 0 | 0 | Not-determined | Genome-fragment | NA   | 0 |
| S1_vs_k141_39967  full    | 2266  | No | NA | 0 | 1 | Not-determined | Genome-fragment | NA   | 0 |
| S1_vs_k141_113935  full   | 2251  | No | NA | 0 | 3 | Not-determined | Genome-fragment | NA   | 0 |
| S1_vs_k141_73917  full    | 1120  | No | NA | 0 | 2 | Not-determined | Genome-fragment | NA   | 0 |
| S1_vs_k141_120637  full   | 2543  | No | NA | 0 | 1 | Not-determined | Genome-fragment | NA   | 0 |
| S5_vs_k141_69268  full    | 1486  | No | NA | 0 | 0 | Low-quality    | Genome-fragment | 4    | 0 |
| S1_vs_k141_47221  full    | 1159  | No | NA | 0 | 1 | Not-determined | Genome-fragment | NA   | 0 |
| S5_vs_k141_59061  full    | 1486  | No | NA | 0 | 0 | Low-quality    | Genome-fragment | 2.6  | 0 |
| S7_extracted_87035        | 1486  | No | NA | 0 | 0 | Low-quality    | Genome-fragment | 3.84 | 0 |
| S16_extracted_101826      | 1486  | No | NA | 2 | 0 | Low-quality    | Genome-fragment | 3.45 | 0 |
| S1_vs_k141_140702  full   | 2976  | No | NA | 0 | 4 | Not-determined | Genome-fragment | NA   | 0 |
| S1_vs_k141_47226  full    | 2962  | No | NA | 0 | 2 | Not-determined | Genome-fragment | NA   | 0 |
| S16_vs_55677  full        | 1486  | No | NA | 0 | 0 | Low-quality    | Genome-fragment | 0.86 | 0 |
| S15_extracted_42392       | 1486  | No | NA | 0 | 2 | Low-quality    | Genome-fragment | 1.05 | 0 |
| S1_vs_k141_27200  full    | 1000  | No | NA | 0 | 0 | Not-determined | Genome-fragment | NA   | 0 |
| S1_vs_k141_129751  full   | 2169  | No | NA | 0 | 0 | Not-determined | Genome-fragment | NA   | 0 |
| S15_vs_68973  full        | 1486  | No | NA | 1 | 0 | Low-quality    | Genome-fragment | 1.14 | 0 |
| S1_vs_k141_20537  full    | 2182  | No | NA | 0 | 2 | Not-determined | Genome-fragment | NA   | 0 |
| S17_extracted_k141_275431 | 1487  | No | NA | 1 | 0 | Low-quality    | Genome-fragment | 3.35 | 0 |
| S1_vs_k141_87391  full    | 2513  | No | NA | 0 | 1 | Not-determined | Genome-fragment | NA   | 0 |
| S1_vs_k141_114040  full   | 1586  | No | NA | 0 | 1 | Not-determined | Genome-fragment | NA   | 0 |
| S14_vs_k141_4798  full    | 1487  | No | NA | 0 | 1 | Low-quality    | Genome-fragment | 0.75 | 0 |
| S14_vs_k141_38133  i2gene | 1487  | No | NA | 1 | 0 | Low-quality    | Genome-fragment | 3.03 | 0 |
| S1_vs_k141_120731  full   | 1059  | No | NA | 0 | 1 | Not-determined | Genome-fragment | NA   | 0 |
| S7_vs_2747  full          | 1487  | No | NA | 0 | 0 | Low-quality    | Genome-fragment | 1.73 | 0 |
| S12_extracted_k141_71340  | 1487  | No | NA | 0 | 0 | Low-quality    | Genome-fragment | 4.58 | 0 |
| S8_vs_k141_19419  i2gene  | 1487  | No | NA | 1 | 0 | Low-quality    | Genome-fragment | 1.55 | 0 |
| S14_extracted_k141_3424   | 1488  | No | NA | 0 | 2 | Low-quality    | Genome-fragment | 3.58 | 0 |
| S1_vs_k141_40755  full    | 1300  | No | NA | 0 | 2 | Not-determined | Genome-fragment | NA   | 0 |
| S3_vs_k141_68237  full    | 1488  | No | NA | 0 | 0 | Low-quality    | Genome-fragment | 4.11 | 0 |
| S1_vs_k141_14149  full    | 2304  | No | NA | 0 | 1 | Not-determined | Genome-fragment | NA   | 0 |
| S1_vs_k141_101414  full   | 1488  | No | NA | 1 | 0 | Low-quality    | Genome-fragment | 3.26 | 0 |
| S1_vs_k141_40790  full    | 1146  | No | NA | 0 | 0 | Not-determined | Genome-fragment | NA   | 0 |
| S1_vs_k141_94172  full    | 3815  | No | NA | 0 | 1 | Not-determined | Genome-fragment | NA   | 0 |
| S1_vs_k141_74138  full    | 1065  | No | NA | 0 | 0 | Not-determined | Genome-fragment | NA   | 0 |
| S3_vs_k141_46507  full    | 1488  | No | NA | 0 | 0 | Low-quality    | Genome-fragment | 1.04 | 0 |
| S5_vs_k141_98558  full    | 1488  | No | NA | 0 | 0 | Low-quality    | Genome-fragment | 2.72 | 0 |
| S1_vs_k141_67403  full    | 2032  | No | NA | 0 | 1 | Not-determined | Genome-fragment | NA   | 0 |
| S1_vs_k141_140932  full   | 2319  | No | NA | 0 | 2 | Not-determined | Genome-fragment | NA   | 0 |
| S7_extracted_48945        | 1488  | No | NA | 1 | 0 | Low-quality    | Genome-fragment | 2.76 | 0 |
| S1_vs_k141_27422  full    | 2134  | No | NA | 0 | 2 | Not-determined | Genome-fragment | NA   | 0 |
| S16_extracted_152695      | 1488  | No | NA | 3 | 0 | Low-quality    | Genome-fragment | 2.56 | 0 |
| S1_vs_k141_107452  full   | 3913  | No | NA | 2 | 0 | Not-determined | Genome-fragment | NA   | 0 |
| S16_vs_124558  i2gene     | 1488  | No | NA | 1 | 0 | Low-quality    | Genome-fragment | 1.03 | 0 |
| S12_vs_k141_72878  full   | 1488  | No | NA | 0 | 0 | Low-quality    | Genome-fragment | 1.41 | 0 |
| S15_extracted_26185       | 1488  | No | NA | 0 | 0 | Low-quality    | Genome-fragment | 3.33 | 0 |
| S1_vs_k141_94301  full    | 2758  | No | NA | 0 | 2 | Not-determined | Genome-fragment | NA   | 0 |
| S15_extracted_40218       | 1488  | No | NA | 0 | 1 | Low-quality    | Genome-fragment | 0.99 | 0 |
| S8_extracted_k141_54909   | 1488  | No | NA | 0 | 0 | Low-quality    | Genome-fragment | 1.02 | 0 |
| S8_vs_k141_57783  full    | 1488  | No | NA | 0 | 2 | Low-quality    | Genome-fragment | 3.85 | 0 |
| S1_vs_k141_140995  full   | 1007  | No | NA | 0 | 0 | Not-determined | Genome-fragment | NA   | 0 |
| S11_extracted_k141_103473 | 1489  | No | NA | 0 | 0 | Low-quality    | Genome-fragment | 1.97 | 0 |
| S11_vs_k141_103627  full  | 1489  | No | NA | 0 | 0 | Low-quality    | Genome-fragment | 1.4  | 0 |
| S13_vs_92862  full        | 1489  | No | NA | 0 | 1 | Low-quality    | Genome-fragment | 0.98 | 0 |
| S1_vs_k141_120880  full   | 1221  | No | NA | 0 | 1 | Not-determined | Genome-fragment | NA   | 0 |
| S1_vs_k141_40963  full    | 2059  | No | NA | 0 | 2 | Not-determined | Genome-fragment | NA   | 0 |
| S1_extracted_k141_155271  | 1489  | No | NA | 1 | 0 | Low-quality    | Genome-fragment | 3.79 | 0 |
| S1_vs_k141_67543  full    | 1661  | No | NA | 0 | 1 | Not-determined | Genome-fragment | NA   | 0 |
| S1_vs_k141_17524  full    | 3618  | No | NA | 0 | 1 | Not-determined | Genome-fragment | NA   | 0 |
| S16_extracted_119163      | 1489  | No | NA | 0 | 1 | Low-quality    | Genome-fragment | 0.8  | 0 |
| S10_vs_96835  full        | 1489  | No | NA | 1 | 0 | Low-quality    | Genome-fragment | 3.85 | 0 |
| S12_vs_k141_151634  full  | 1489  | No | NA | 0 | 0 | Low-quality    | Genome-fragment | 3.53 | 0 |
| S15_extracted_69246       | 1489  | No | NA | 0 | 2 | Low-quality    | Genome-fragment | 0.63 | 0 |
| S8_extracted_k141_6227    | 1489  | No | NA | 0 | 1 | Low-quality    | Genome-fragment | 3.85 | 0 |
| S1_vs_k141_20910  full    | 2810  | No | NA | 0 | 2 | Not-determined | Genome-fragment | NA   | 0 |
| S17_extracted_k141_12846  | 1490  | No | NA | 0 | 0 | Low-quality    | Genome-fragment | 2.35 | 0 |
| S9_vs_k141_39685  full    | 1490  | No | NA | 1 | 0 | Low-quality    | Genome-fragment | 3.61 | 0 |
| S13_vs_35590  full        | 1490  | No | NA | 1 | 0 | Low-quality    | Genome-fragment | 3.16 | 0 |
| S1_vs_k141_87711  full    | 1346  | No | NA | 1 | 1 | Not-determined | Genome-fragment | NA   | 0 |
| S13_vs_109253  full       | 1490  | No | NA | 0 | 0 | Low-quality    | Genome-fragment | 2.72 | 0 |
| S3_vs_k141_39146  full    | 1490  | No | NA | 0 | 0 | Low-quality    | Genome-fragment | 2.7  | 0 |
| S10_vs_52573  full        | 1490  | No | NA | 0 | 0 | Low-quality    | Genome-fragment | 1.71 | 0 |
| S12_vs_k141_127056  full  | 1490  | No | NA | 0 | 0 | Low-quality    | Genome-fragment | 0.86 | 0 |
| S1_vs_k141_60613  full    | 3502  | No | NA | 0 | 1 | Not-determined | Genome-fragment | NA   | 0 |
| S10_vs_52573  full        | 2050  | No | NA | 0 | 0 | Not-determined | Genome-fragment | NA   | 0 |
| S4_extracted_8279         | 1490  | No | NA | 0 | 0 | Low-quality    | Genome-fragment | 1.07 | 0 |
| S11_vs_k141_77050  full   | 1491  | No | NA | 1 | 0 | Low-quality    | Genome-fragment | 2.8  | 0 |
| S14_extracted_k141_31563  | 1491  | No | NA | 2 | 0 | Low-quality    | Genome-fragment | 4.85 | 0 |
| S1_vs_k141_94469  full    | 1830  | No | NA | 0 | 1 | Not-determined | Genome-fragment | NA   | 0 |
| S14_vs_k141_11773  full   | 1491  | No | NA | 1 | 0 | Low-quality    | Genome-fragment | 3.43 | 0 |
| S1_vs_k141_107613  full   | 2097  | No | NA | 0 | 0 | Not-determined | Genome-fragment | NA   | 0 |
| S1_vs_k141_87819  full    | 1491  | No | NA | 0 | 0 | Low-quality    | Genome-fragment | 3.41 | 0 |
| S3_extracted_k141_24182   | 1491  | No | NA | 0 | 1 | Low-quality    | Genome-fragment | 1.01 | 0 |
| S5_vs_k141_140941  i2gene | 1491  | No | NA | 1 | 0 | Low-quality    | Genome-fragment | 3.02 | 0 |
| S7_extracted_19384        | 1491  | No | NA | 0 | 0 | Low-quality    | Genome-fragment | 2.95 | 0 |
| S16_vs_63253  full        | 1491  | No | NA | 0 | 1 | Low-quality    | Genome-fragment | 3.48 | 0 |
| S1_vs_k141_8961  full     | 2093  | No | NA | 0 | 1 | Not-determined | Genome-fragment | NA   | 0 |
| S1_vs_k141_141202  full   | 1930  | No | NA | 0 | 2 | Not-determined | Genome-fragment | NA   | 0 |
| S16_vs_23187  i2gene      | 1491  | No | NA | 0 | 0 | Low-quality    | Genome-fragment | 3.27 | 0 |
| S1_vs_k141_81207  full    | 6380  | No | NA | 0 | 7 | Not-determined | Genome-fragment | NA   | 0 |
| S6_vs_k141_7555  full     | 1491  | No | NA | 0 | 1 | Low-quality    | Genome-fragment | 1.06 | 0 |
| S1_vs_k141_5121  full     | 8990  | No | NA | 0 | 1 | Not-determined | Genome-fragment | NA   | 0 |
| S1_vs_k141_54451  full    | 1493  | No | NA | 0 | 1 | Not-determined | Genome-fragment | NA   | 0 |
| S6_vs_k141_45573  full    | 1491  | No | NA | 0 | 0 | Low-quality    | Genome-fragment | 1.39 | 0 |
| S8_vs_k141_57429  full    | 1491  | No | NA | 0 | 1 | Low-quality    | Genome-fragment | 0.97 | 0 |
| S1_vs_k141_11090  full    | 1042  | No | NA | 0 | 0 | Not-determined | Genome-fragment | NA   | 0 |
| S8_vs_k141_180910  full   | 1491  | No | NA | 0 | 0 | Low-quality    | Genome-fragment | 1.62 | 0 |
| S17_vs_k141_28531  full   | 1492  | No | NA | 0 | 0 | Low-quality    | Genome-fragment | 3.14 | 0 |
| S9_vs_k141_18768  full    | 1492  | No | NA | 0 | 0 | Low-quality    | Genome-fragment | 3.34 | 0 |
| S9_vs_k141_62719  full    | 1492  | No | NA | 0 | 0 | Low-quality    | Genome-fragment | 3.14 | 0 |
| S14_vs_k141_3657  full    | 1492  | No | NA | 0 | 0 | Low-quality    | Genome-fragment | 3.1  | 0 |
| S5_vs_k141_10183  full    | 1492  | No | NA | 0 | 0 | Low-quality    | Genome-fragment | 2.24 | 0 |
| S1_vs_k141_94638  full    | 1490  | No | NA | 0 | 0 | Not-determined | Genome-fragment | NA   | 0 |
| S1_vs_k141_101269  full   | 2134  | No | NA | 0 | 0 | Not-determined | Genome-fragment | NA   | 0 |
| S7_vs_299  full           | 1492  | No | NA | 1 | 0 | Low-quality    | Genome-fragment | 2.01 | 0 |
| S1_vs_k141_47832  full    | 4015  | No | NA | 0 | 1 | Not-determined | Genome-fragment | NA   | 0 |
| S16_vs_59764  full        | 1492  | No | NA | 0 | 1 | Low-quality    | Genome-fragment | 0.77 | 0 |
| S1_vs_k141_41314  full    | 1187  | No | NA | 0 | 1 | Not-determined | Genome-fragment | NA   | 0 |
| S15_vs_97801  full        | 1492  | No | NA | 0 | 0 | Low-quality    | Genome-fragment | 0.86 | 0 |
| S8_vs_k141_56168  full    | 1492  | No | NA | 1 | 0 | Low-quality    | Genome-fragment | 3.3  | 0 |
| S1_vs_k141_41290  full    | 2854  | No | NA | 0 | 0 | Not-determined | Genome-fragment | NA   | 0 |
| S1_vs_k141_141209  full   | 2304  | No | NA | 0 | 0 | Low-quality    | Genome-fragment | NA   | 0 |
| S8_vs_k141_146953  full   | 1492  | No | NA | 1 | 0 | Low-quality    | Genome-fragment | 3.33 | 0 |
| S17_vs_k141_32085  full   | 1493  | No | NA | 0 | 0 | Low-quality    | Genome-fragment | 1.65 | 0 |
| S1_vs_k141_27788  full    | 2289  | No | NA | 0 | 3 | Not-determined | Genome-fragment | NA   | 0 |
| S11_extracted_k141_37320  | 1493  | No | NA | 0 | 0 | Low-quality    | Genome-fragment | 3.27 | 0 |
| S11_vs_k141_92210  full   | 1493  | No | NA | 0 | 0 | Low-quality    | Genome-fragment | 3.54 | 0 |
| S1_vs_k141_41325  full    | 1244  | No | NA | 0 | 1 | Not-determined | Genome-fragment | NA   | 0 |
| S3_vs_k141_126263  full   | 1493  | No | NA | 0 | 0 | Low-quality    | Genome-fragment | 3.7  | 0 |
| S1_vs_k141_14853  full    | 1265  | No | NA | 0 | 1 | Not-determined | Genome-fragment | NA   | 0 |
| S1_vs_k141_10331  full    | 2538  | No | NA | 0 | 2 | Not-determined | Genome-fragment | NA   | 0 |
| S1_vs_k141_128046  full   | 7815  | No | NA | 0 | 3 | Not-determined | Genome-fragment | NA   | 0 |
| S1_vs_k141_27866  full    | 1126  | No | NA | 0 | 1 | Not-determined | Genome-fragment | NA   | 0 |
| S5_vs_k141_85760  i2gene  | 1493  | No | NA | 2 | 0 | Low-quality    | Genome-fragment | 2.5  | 0 |
| S16_vs_124123  full       | 1493  | No | NA | 0 | 0 | Low-quality    | Genome-fragment | 3.62 | 0 |
| S10_vs_39341  full        | 1493  | No | NA | 0 | 0 | Low-quality    | Genome-fragment | 1.92 | 0 |
| S6_extracted_k141_46715   | 1493  | No | NA | 0 | 1 | Low-quality    | Genome-fragment | 3.32 | 0 |
| S1_vs_k141_21261  full    | 14418 | No | NA | 0 | 9 | Not-determined | Genome-fragment | NA   | 0 |
| S6_vs_k141_13215  i2gene  | 1493  | No | NA | 1 | 0 | Low-quality    | Genome-fragment | 2.51 | 0 |
| S1_vs_k141_154248  full   | 1019  | No | NA | 0 | 2 | Not-determined | Genome-fragment | NA   | 0 |
| S8_extracted_k141_739     | 1493  | No | NA | 0 | 0 | Low-quality    | Genome-fragment | 4.75 | 0 |
| S1_vs_k141_48031  full    | 2285  | No | NA | 0 | 0 | Not-determined | Genome-fragment | NA   | 0 |
| S13_extracted_68522       | 1494  | No | NA | 0 | 0 | Low-quality    | Genome-fragment | 2.01 | 0 |
| S1_vs_k141_54705  full    | 1928  | No | NA | 0 | 1 | Not-determined | Genome-fragment | NA   | 0 |
| S7_vs_40601  full         | 1494  | No | NA | 1 | 0 | Low-quality    | Genome-fragment | 2.02 | 0 |
| S1_vs_k141_54708  full    | 5273  | No | NA | 0 | 2 | Not-determined | Genome-fragment | NA   | 0 |
| S1_vs_k141_54717  full    | 1491  | No | NA | 0 | 0 | Not-determined | Genome-fragment | NA   | 0 |
| S7_vs_105989  full        | 1494  | No | NA | 1 | 0 | Low-quality    | Genome-fragment | 0.89 | 0 |
| S1_vs_k141_141428  full   | 4318  | No | NA | 0 | 3 | Not-determined | Genome-fragment | NA   | 0 |
| S16_vs_11046  full        | 1494  | No | NA | 0 | 0 | Low-quality    | Genome-fragment | 2.96 | 0 |
| S1_vs_k141_41473  full    | 1684  | No | NA | 0 | 0 | Not-determined | Genome-fragment | NA   | 0 |
| S6_vs_k141_56241  full    | 1494  | No |    |   |   |                |                 |      |   |



|                           |            |       |      |   |   |                |                 |    |      |   |
|---------------------------|------------|-------|------|---|---|----------------|-----------------|----|------|---|
| S1_v1_k141_260661         | [full]     | 2436  | NA   | 0 | 2 | Low-quality    | Genome-fragment | NA | 1.23 | 0 |
| S1_v1_k141_950651         | [full]     | 2323  | NA   | 0 | 1 | Not determined | Genome-fragment | NA | 2.61 | 0 |
| S6_v1_k141_369241         | [full]     | 1496  | NA   | 0 | 0 | Low-quality    | Genome-fragment | NA | 0.93 | 0 |
| S6_extracted_k141_28041   | [full]     | 1496  | NA   | 0 | 0 | Low-quality    | Genome-fragment | NA | 2.61 | 0 |
| S1_v1_k141_1017471        | [full]     | 1496  | NA   | 0 | 0 | Not determined | Genome-fragment | NA | 2.41 | 0 |
| S9_extracted_k141_1832    | [full]     | 1497  | NA   | 0 | 0 | Low-quality    | Genome-fragment | NA | 2.49 | 0 |
| S1_v1_k141_552921         | [full]     | 1497  | NA   | 0 | 0 | Low-quality    | Genome-fragment | NA | 4.37 | 0 |
| S1_v1_k141_11441          | [full]     | 1497  | NA   | 3 | 0 | Low-quality    | Genome-fragment | NA | 2.31 | 0 |
| S1_v1_k141_1113131        | [full]     | 1497  | NA   | 1 | 0 | Low-quality    | Genome-fragment | NA | 4.01 | 0 |
| S12_v1_k141_140221        | [full]     | 1497  | NA   | 0 | 1 | Low-quality    | Genome-fragment | NA | 1.22 | 0 |
| S1_v1_k141_1349351        | [full]     | 1340  | NA   | 0 | 1 | Not determined | Genome-fragment | NA | 2.45 | 0 |
| S6_v1_k141_87021          | [full]     | 1497  | NA   | 2 | 0 | Low-quality    | Genome-fragment | NA | 2.67 | 0 |
| S8_extracted_k141_174010  | [full]     | 1497  | NA   | 0 | 2 | Low-quality    | Genome-fragment | NA | 0.94 | 0 |
| S1_v1_k141_50011          | [full]     | 1348  | NA   | 2 | 2 | Not determined | Genome-fragment | NA | 0.94 | 0 |
| S8_extracted_k141_192038  | [full]     | 1497  | NA   | 1 | 0 | Low-quality    | Genome-fragment | NA | 2.32 | 0 |
| S1_v1_k141_492341         | [full]     | 1498  | NA   | 1 | 0 | Low-quality    | Genome-fragment | NA | 3.09 | 0 |
| S1_v1_k141_550231         | [full]     | 1498  | NA   | 1 | 1 | Not determined | Genome-fragment | NA | 0.71 | 0 |
| S1_v1_k141_1083181        | [full]     | 1653  | NA   | 0 | 0 | Not determined | Genome-fragment | NA | 2.32 | 0 |
| S1_v1_k141_1284401        | [full]     | 1047  | NA   | 0 | 1 | Not determined | Genome-fragment | NA | 0.71 | 0 |
| S1_v1_k141_417541         | [full]     | 6372  | NA   | 0 | 2 | Not determined | Genome-fragment | NA | 0.71 | 0 |
| S1_v1_k141_152951         | [full]     | 0     | 1498 | 0 | 0 | Low-quality    | Genome-fragment | NA | 3.2  | 0 |
| S1_v1_k141_153371         | [full]     | 6505  | NA   | 0 | 2 | Not determined | Genome-fragment | NA | 0.71 | 0 |
| S1_v1_k141_347491         | [full]     | 2061  | NA   | 0 | 1 | Not determined | Genome-fragment | NA | 1.87 | 0 |
| S1_v1_k141_277151         | [full]     | 1498  | NA   | 0 | 1 | Low-quality    | Genome-fragment | NA | 2.88 | 0 |
| S1_v1_k141_1058941        | [full]     | 1498  | NA   | 0 | 0 | Low-quality    | Genome-fragment | NA | 1.87 | 0 |
| S1_v1_k141_1215731        | [full]     | 1491  | NA   | 0 | 1 | Not determined | Genome-fragment | NA | 2.88 | 0 |
| S1_v1_k141_484281         | [full]     | 1078  | NA   | 0 | 2 | Not determined | Genome-fragment | NA | 0.71 | 0 |
| S14_v1_k141_284231        | [full]     | 1498  | NA   | 0 | 0 | Low-quality    | Genome-fragment | NA | 3.38 | 0 |
| S1_v1_k141_1018351        | [full]     | 1082  | NA   | 0 | 1 | Not determined | Genome-fragment | NA | 0.71 | 0 |
| S1_extracted_k141_131762  | [full]     | 1498  | NA   | 0 | 1 | Low-quality    | Genome-fragment | NA | 1.96 | 0 |
| S1_v1_k141_379221         | [full]     | 1498  | NA   | 0 | 0 | Low-quality    | Genome-fragment | NA | 2.45 | 0 |
| S5_extracted_k141_131615  | [full]     | 1498  | NA   | 0 | 1 | Low-quality    | Genome-fragment | NA | 1.77 | 0 |
| S1_v1_k141_8461           | [full]     | 1740  | NA   | 0 | 1 | Not determined | Genome-fragment | NA | 3.82 | 0 |
| S10_extracted_1589        | [full]     | 1498  | NA   | 1 | 1 | Low-quality    | Genome-fragment | NA | 0.71 | 0 |
| S17_extracted_k141_82683  | [full]     | 1499  | NA   | 0 | 2 | Low-quality    | Genome-fragment | NA | 0.71 | 0 |
| S9_v1_k141_454601         | [full]     | 1499  | NA   | 0 | 1 | Low-quality    | Genome-fragment | NA | 1.33 | 0 |
| S6_v1_1094451             | [full]     | 1499  | NA   | 0 | 0 | Low-quality    | Genome-fragment | NA | 2.83 | 0 |
| S10_v1_382781             | [full]     | 1499  | NA   | 0 | 1 | Low-quality    | Genome-fragment | NA | 4.23 | 0 |
| S11_v1_k141_248131        | [H2genome] | 1500  | NA   | 1 | 0 | Low-quality    | Genome-fragment | NA | 3.79 | 0 |
| S14_extracted_k141_82978  | [full]     | 1500  | NA   | 1 | 0 | Low-quality    | Genome-fragment | NA | 2.52 | 0 |
| S1_v1_k141_901321         | [H2genome] | 1500  | NA   | 0 | 1 | Low-quality    | Genome-fragment | NA | 0.97 | 0 |
| S1_v1_k141_1541431        | [full]     | 5143  | NA   | 0 | 1 | Not determined | Genome-fragment | NA | 0.97 | 0 |
| S1_v1_k141_751491         | [full]     | 8778  | NA   | 0 | 6 | Not determined | Genome-fragment | NA | 2.64 | 0 |
| S1_v1_k141_80771          | [full]     | 1500  | NA   | 0 | 0 | Low-quality    | Genome-fragment | NA | 2.64 | 0 |
| S1_v1_k141_85171          | [full]     | 1147  | NA   | 0 | 0 | Not determined | Genome-fragment | NA | 0.71 | 0 |
| S1_v1_k141_1034461        | [H2genome] | 1500  | NA   | 2 | 0 | Low-quality    | Genome-fragment | NA | 1.07 | 0 |
| S1_v1_k141_154461         | [full]     | 1506  | NA   | 1 | 1 | Not determined | Genome-fragment | NA | 0.71 | 0 |
| S10_v1_46791              | [full]     | 1500  | NA   | 1 | 0 | Low-quality    | Genome-fragment | NA | 2.88 | 0 |
| S1_v1_k141_7541931        | [full]     | 2576  | NA   | 0 | 1 | Not determined | Genome-fragment | NA | 0.71 | 0 |
| S10_v1_24571              | [full]     | 1500  | NA   | 0 | 0 | Low-quality    | Genome-fragment | NA | 4.13 | 0 |
| S1_v1_k141_884671         | [full]     | 1318  | NA   | 0 | 1 | Not determined | Genome-fragment | NA | 0.71 | 0 |
| S1_v1_k141_1545961        | [full]     | 3147  | NA   | 0 | 3 | Not determined | Genome-fragment | NA | 2.89 | 0 |
| S12_v1_k141_761391        | [full]     | 1500  | NA   | 0 | 0 | Low-quality    | Genome-fragment | NA | 4.13 | 0 |
| S1_v1_k141_1546081        | [full]     | 5078  | NA   | 0 | 6 | Not determined | Genome-fragment | NA | 0.71 | 0 |
| S17_v1_k141_129231        | [H2genome] | 1501  | NA   | 1 | 0 | Low-quality    | Genome-fragment | NA | 2.63 | 0 |
| S1_v1_k141_885121         | [full]     | 1020  | NA   | 0 | 0 | Not determined | Genome-fragment | NA | 2.63 | 0 |
| S1_v1_k141_510951         | [full]     | 1089  | NA   | 0 | 0 | Not determined | Genome-fragment | NA | 2.63 | 0 |
| S1_v1_k141_79681          | [full]     | 1501  | NA   | 0 | 0 | Low-quality    | Genome-fragment | NA | 3.45 | 0 |
| S1_v1_k141_85911          | [full]     | 5231  | NA   | 0 | 3 | Not determined | Genome-fragment | NA | 2.45 | 0 |
| S1_v1_k141_685181         | [full]     | 3310  | NA   | 0 | 2 | Not determined | Genome-fragment | NA | 3.71 | 0 |
| S1_v1_k141_15631          | [full]     | 501   | NA   | 0 | 0 | Low-quality    | Genome-fragment | NA | 0.71 | 0 |
| S1_v1_k141_485971         | [full]     | 1029  | NA   | 0 | 0 | Not determined | Genome-fragment | NA | 0.71 | 0 |
| S1_v1_k141_155401         | [full]     | 2061  | NA   | 0 | 0 | Not determined | Genome-fragment | NA | 0.71 | 0 |
| S1_v1_k141_1127301        | [full]     | 1501  | NA   | 0 | 0 | Low-quality    | Genome-fragment | NA | 3.6  | 0 |
| S1_v1_k141_1152561        | [full]     | 2231  | NA   | 0 | 0 | Not determined | Genome-fragment | NA | 0.71 | 0 |
| S1_v1_k141_1561           | [full]     | 1501  | NA   | 2 | 0 | Low-quality    | Genome-fragment | NA | 2.41 | 0 |
| S1_v1_k141_1419641        | [full]     | 1950  | NA   | 3 | 1 | Not determined | Genome-fragment | NA | 0.71 | 0 |
| S7_v1_10561               | [full]     | 1501  | NA   | 0 | 1 | Low-quality    | Genome-fragment | NA | 1.26 | 0 |
| S1_v1_k141_218321         | [full]     | 5391  | NA   | 0 | 6 | Not determined | Genome-fragment | NA | 2.83 | 0 |
| S12_extracted_k141_146021 | [full]     | 1501  | NA   | 0 | 0 | Low-quality    | Genome-fragment | NA | 3.9  | 0 |
| S1_v1_k141_21861          | [full]     | 501   | NA   | 1 | 0 | Low-quality    | Genome-fragment | NA | 2.93 | 0 |
| S12_v1_k141_1472821       | [full]     | 1501  | NA   | 0 | 0 | Low-quality    | Genome-fragment | NA | 3.18 | 0 |
| S12_v1_k141_1484741       | [full]     | 1501  | NA   | 0 | 0 | Low-quality    | Genome-fragment | NA | 0.84 | 0 |
| S2_v1_k141_610921         | [full]     | 1514  | NA   | 0 | 0 | Not determined | Genome-fragment | NA | 0.71 | 0 |
| S6_v1_k141_490961         | [full]     | 1501  | NA   | 1 | 0 | Low-quality    | Genome-fragment | NA | 2.62 | 0 |
| S1_v1_k141_753541         | [full]     | 1294  | NA   | 0 | 1 | Not determined | Genome-fragment | NA | 2.62 | 0 |
| S1_v1_k141_286001         | [full]     | 2250  | NA   | 0 | 2 | Not determined | Genome-fragment | NA | 0.71 | 0 |
| S6_v1_k141_274451         | [full]     | 1501  | NA   | 0 | 0 | Low-quality    | Genome-fragment | NA | 4.26 | 0 |
| S9_extracted_k141_70925   | [full]     | 1502  | NA   | 0 | 0 | Low-quality    | Genome-fragment | NA | 1.38 | 0 |
| S1_v1_k141_181621         | [full]     | 1502  | NA   | 2 | 0 | Low-quality    | Genome-fragment | NA | 0.8  | 0 |
| S1_v1_k141_347011         | [full]     | 1502  | NA   | 3 | 0 | Low-quality    | Genome-fragment | NA | 2.46 | 0 |
| S13_v1_536901             | [full]     | 1502  | NA   | 1 | 0 | Low-quality    | Genome-fragment | NA | 3.63 | 0 |
| S1_v1_k141_688891         | [full]     | 1502  | NA   | 1 | 0 | Low-quality    | Genome-fragment | NA | 4.23 | 0 |
| S1_v1_k141_1264641        | [full]     | 1502  | NA   | 0 | 0 | Low-quality    | Genome-fragment | NA | 4.23 | 0 |
| S1_v1_k141_80041          | [H2genome] | 1502  | NA   | 2 | 0 | Low-quality    | Genome-fragment | NA | 3.21 | 0 |
| S1_v1_k141_754031         | [full]     | 8872  | NA   | 0 | 5 | Not determined | Genome-fragment | NA | 4.17 | 0 |
| S12_extracted_k141_3871   | [full]     | 1502  | NA   | 0 | 0 | Low-quality    | Genome-fragment | NA | 0.71 | 0 |
| S1_v1_k141_686861         | [full]     | 1291  | NA   | 0 | 3 | Not determined | Genome-fragment | NA | 0.71 | 0 |
| S1_v1_k141_87601          | [full]     | 1073  | NA   | 0 | 0 | Not determined | Genome-fragment | NA | 4.61 | 0 |
| S1_v1_k141_1289951        | [H2genome] | 1502  | NA   | 0 | 0 | Low-quality    | Genome-fragment | NA | 0.65 | 0 |
| S7_702901                 | [full]     | 1502  | NA   | 0 | 2 | Low-quality    | Genome-fragment | NA | 0.65 | 0 |
| S1_v1_k141_487831         | [full]     | 1206  | NA   | 0 | 1 | Not determined | Genome-fragment | NA | 0.71 | 0 |
| S1_v1_k141_219361         | [full]     | 2382  | NA   | 0 | 1 | Not determined | Genome-fragment | NA | 2.36 | 0 |
| S16_extracted_72283       | [full]     | 1502  | NA   | 0 | 0 | Low-quality    | Genome-fragment | NA | 0.71 | 0 |
| S1_v1_k141_1021961        | [full]     | 3843  | NA   | 0 | 5 | Not determined | Genome-fragment | NA | 0.71 | 0 |
| S1_v1_k141_487961         | [full]     | 1422  | NA   | 0 | 1 | Not determined | Genome-fragment | NA | 0.71 | 0 |
| S1_v1_k141_921901         | [full]     | 2823  | NA   | 0 | 2 | Not determined | Genome-fragment | NA | 0.71 | 0 |
| S10_extracted_85642       | [full]     | 1502  | NA   | 0 | 0 | Low-quality    | Genome-fragment | NA | 2.27 | 0 |
| S1_v1_k141_169961         | [full]     | 1403  | NA   | 0 | 1 | Not determined | Genome-fragment | NA | 0.71 | 0 |
| S10_v1_409851             | [full]     | 1502  | NA   | 0 | 0 | Low-quality    | Genome-fragment | NA | 2.78 | 0 |
| S15_extracted_38566       | [full]     | 1502  | NA   | 0 | 1 | Low-quality    | Genome-fragment | NA | 0.56 | 0 |
| S2_extracted_k141_18690   | [full]     | 1502  | NA   | 0 | 1 | Low-quality    | Genome-fragment | NA | 0.61 | 0 |
| S1_v1_k141_887231         | [full]     | 2570  | NA   | 0 | 2 | Not determined | Genome-fragment | NA | 0.71 | 0 |
| S1_v1_k141_887721         | [full]     | 381   | NA   | 0 | 0 | Not determined | Genome-fragment | NA | 0.71 | 0 |
| S1_v1_k141_887771         | [full]     | 4338  | NA   | 0 | 2 | Not determined | Genome-fragment | NA | 2.78 | 0 |
| S6_extracted_k141_9626    | [full]     | 1502  | NA   | 2 | 0 | Low-quality    | Genome-fragment | NA | 4.21 | 0 |
| S1_v1_k141_350571         | [full]     | 1584  | NA   | 0 | 2 | Not determined | Genome-fragment | NA | 0.71 | 0 |
| S6_v1_k141_482951         | [full]     | 1502  | NA   | 1 | 0 | Low-quality    | Genome-fragment | NA | 2.78 | 0 |
| S1_v1_k141_955921         | [full]     | 2377  | NA   | 0 | 2 | Not determined | Genome-fragment | NA | 0.71 | 0 |
| S1_v1_k141_1219901        | [full]     | 1541  | NA   | 0 | 0 | Not determined | Genome-fragment | NA | 0.71 | 0 |
| S8_v1_k141_1761841        | [full]     | 1502  | NA   | 1 | 0 | Low-quality    | Genome-fragment | NA | 3.29 | 0 |
| S1_v1_k141_755151         | [full]     | 10470 | NA   | 0 | 2 | Not determined | Genome-fragment | NA | 0.71 | 0 |
| S1_v1_k141_822631         | [full]     | 1509  | NA   | 0 | 1 | Not determined | Genome-fragment | NA | 0.31 | 0 |
| S1_v1_k141_81641          | [full]     | 0     | 1503 | 0 | 0 | Low-quality    | Genome-fragment | NA | 3.95 | 0 |
| S11_v1_k141_400021        | [full]     | 1503  | NA   | 1 | 0 | Low-quality    | Genome-fragment | NA | 3.22 | 0 |
| S1_v1_k141_154851         | [full]     | 1186  | NA   | 0 | 1 | Not determined | Genome-fragment | NA | 0.71 | 0 |
| S1_v1_k141_923071         | [full]     | 5183  | NA   | 0 | 3 | Not determined | Genome-fragment | NA | 0.71 | 0 |
| S1_v1_k141_288221         | [full]     | 2160  | NA   | 0 | 0 | Not determined | Genome-fragment | NA | 0.71 | 0 |
| S1_v1_k141_221051         | [full]     | 3011  | NA   | 0 | 0 | Not determined | Genome-fragment | NA | 0.71 | 0 |
| S1_v1_k141_351341         | [full]     | 1044  | NA   | 0 | 3 | Not determined | Genome-fragment | NA | 0.71 | 0 |
| S11_v1_k141_102201        | [full]     | 1503  | NA   | 1 | 0 | Low-quality    | Genome-fragment | NA | 3.41 | 0 |
| S12_extracted_k141_169020 | [full]     | 1503  | NA   | 0 | 1 | Low-quality    | Genome-fragment | NA | 0.99 | 0 |
| S1_v1_k141_89551          | [full]     | 3020  | NA   | 0 | 1 | Not determined | Genome-fragment | NA | 1.88 | 0 |
| S1_v1_k141_2381           | [full]     | 1708  | NA   | 0 | 0 | Low-quality    | Genome-fragment | NA | 0.8  | 0 |
| S1_v1_k141_423011         | [full]     | 1503  | NA   | 0 | 1 | Not determined | Genome-fragment | NA | 0.8  | 0 |
| S1_v1_k141_351821         | [full]     | 1530  | NA   | 0 | 0 | Not determined | Genome-fragment | NA | 0.8  | 0 |
| S1_v1_k141_16041          | [full]     | 5415  | NA   | 2 | 2 | Not determined | Genome-fragment | NA | 0.71 | 0 |
| S12_v1_k141_143821        | [full]     | 1503  | NA   | 1 | 0 | Low-quality    | Genome-fragment | NA | 3.69 | 0 |
| S1_v1_k141_756591         | [full]     | 4347  | NA   | 0 | 2 | Not determined | Genome-fragment | NA | 2.78 | 0 |
| S1_v1_k141_1062041        | [full]     | 1503  | NA   | 0 | 0 | Low-quality    | Genome-fragment | NA | 3.57 | 0 |
| S8_v1_k141_185701         | [full]     | 1503  | NA   | 0 | 1 | Low-quality    | Genome-fragment | NA | 1.76 | 0 |
| S8_v1_k141_600581         | [full]     | 1503  | NA   | 0 | 1 | Low-quality    | Genome-fragment | NA | 0.31 | 0 |
| S9_extracted_k141_23833   | [full]     | 1504  | NA   | 0 | 1 | Low-quality    | Genome-fragment | NA | 3.16 | 0 |
| S1_v1_k141_824051         | [full]     | 1623  | NA   | 0 | 2 |                |                 |    |      |   |



|                           |             |       |     |      |    |   |                |                 |       |       |
|---------------------------|-------------|-------|-----|------|----|---|----------------|-----------------|-------|-------|
| S12_vs_k141_187265        | [full]      | 1506  | No  | NA   | 0  | 0 | Low-quality    | Genome-fragment | 2.57  | 0     |
| S8_extracted_k141_25623   |             | 1506  | No  | NA   | 2  | 0 | Low-quality    | Genome-fragment | 1.94  | 0     |
| S1_vs_k141_82662          | [full]      | 1812  | No  | NA   | 0  | 0 | Not-determined | Genome-fragment | NA    | 0     |
| S1_vs_k141_102687         | [full]      | 1891  | No  | NA   | 0  | 2 | Not-determined | Genome-fragment | NA    | 0     |
| S1_vs_k141_2361           | [full]      | 1904  | No  | NA   | 0  | 2 | Not-determined | Genome-fragment | NA    | 0     |
| S1_vs_k141_83189          | [full]      | 1846  | No  | NA   | 0  | 0 | Not-determined | Genome-fragment | NA    | 0     |
| S1_vs_k141_22371          | [full]      | 1896  | No  | NA   | 0  | 0 | Not-determined | Genome-fragment | NA    | 0     |
| S8_vs_k141_179623         | [full]      | 1506  | No  | NA   | 0  | 0 | Low-quality    | Genome-fragment | 0.5   | 0     |
| S1_vs_k141_82691          | [full]      | 1412  | No  | NA   | 3  | 1 | Not-determined | Genome-fragment | NA    | 0     |
| S9_vs_k141_59994          | [full]      | 1507  | No  | NA   | 0  | 1 | Low-quality    | Genome-fragment | 2.67  | 0     |
| S14_vs_k141_113117        | [full]      | 1507  | No  | NA   | 1  | 0 | Low-quality    | Genome-fragment | 4.08  | 0     |
| S14_vs_k141_67369         | [1/2]genome | 1507  | No  | NA   | 0  | 0 | Low-quality    | Genome-fragment | 3.87  | 0     |
| S1_vs_k141_9343           | [full]      | 1024  | No  | NA   | 0  | 0 | Not-determined | Genome-fragment | NA    | 0     |
| S1_vs_k141_56020          | [full]      | 1382  | No  | NA   | 0  | 0 | Not-determined | Genome-fragment | NA    | 0     |
| S1_extracted_k141_50205   |             | 1507  | No  | NA   | 0  | 1 | Low-quality    | Genome-fragment | 0.26  | 0     |
| S5_vs_k141_15042          | [full]      | 1507  | No  | NA   | 0  | 0 | Low-quality    | Genome-fragment | 3.38  | 0     |
| S1_vs_k141_69231          | [full]      | 5411  | No  | NA   | 0  | 1 | Not-determined | Genome-fragment | NA    | 0     |
| S1_vs_k141_109289         | [full]      | 1094  | No  | NA   | 0  | 1 | Not-determined | Genome-fragment | NA    | 0     |
| S5_vs_k141_99502          | [full]      | 1507  | No  | NA   | 0  | 0 | Low-quality    | Genome-fragment | 3.4   | 0     |
| S7_vs_20432               | [full]      | 1507  | No  | NA   | 1  | 0 | Low-quality    | Genome-fragment | 2.33  | 0     |
| S10_extracted_83392       |             | 1507  | No  | NA   | 0  | 1 | Low-quality    | Genome-fragment | 0.57  | 0     |
| S15_vs_52164              | [full]      | 1507  | No  | NA   | 0  | 0 | Low-quality    | Genome-fragment | 5.22  | 0     |
| S6_vs_k141_35734          | [full]      | 1507  | No  | NA   | 0  | 2 | Low-quality    | Genome-fragment | 1.13  | 0     |
| S6_vs_k141_24632          | [full]      | 1507  | No  | NA   | 0  | 1 | Low-quality    | Genome-fragment | 3.75  | 0     |
| S1_vs_k141_142716         | [full]      | 1071  | No  | NA   | 0  | 1 | Not-determined | Genome-fragment | NA    | 0     |
| S1_vs_k141_5403           | [full]      | 1876  | No  | NA   | 0  | 2 | Not-determined | Genome-fragment | NA    | 0     |
| S1_vs_k141_35492          | [full]      | 1228  | No  | NA   | 0  | 0 | Not-determined | Genome-fragment | NA    | 0     |
| S17_vs_k141_17544         | [full]      | 1508  | No  | NA   | 0  | 1 | Low-quality    | Genome-fragment | 1.79  | 0     |
| S9_extracted_k141_84567   |             | 1508  | No  | NA   | 0  | 0 | Low-quality    | Genome-fragment | 3.36  | 0     |
| S11_vs_k141_1011          | [full]      | 1508  | No  | NA   | 3  | 0 | Low-quality    | Genome-fragment | 3.41  | 0     |
| S14_vs_k141_103462        | [full]      | 1508  | No  | NA   | 0  | 1 | Low-quality    | Genome-fragment | 1.45  | 0     |
| S1_vs_k141_96192          | [full]      | 3538  | No  | NA   | 0  | 1 | Not-determined | Genome-fragment | NA    | 0     |
| S3_vs_k141_48981          | [full]      | 1508  | No  | NA   | 2  | 0 | Low-quality    | Genome-fragment | 3.46  | 0     |
| S1_vs_k141_76106          | [full]      | 4018  | No  | NA   | 0  | 2 | Not-determined | Genome-fragment | NA    | 0     |
| S1_vs_k141_56110          | [full]      | 1206  | No  | NA   | 0  | 0 | Not-determined | Genome-fragment | NA    | 0     |
| S3_vs_k141_10955          | [full]      | 1508  | No  | NA   | 0  | 0 | Low-quality    | Genome-fragment | 3.98  | 0     |
| S1_vs_k141_96231          | [full]      | 1314  | No  | NA   | 0  | 0 | Not-determined | Genome-fragment | NA    | 0     |
| S1_vs_k141_142793         | [full]      | 3273  | No  | NA   | 0  | 0 | Not-determined | Genome-fragment | NA    | 0     |
| S1_vs_k141_69539          | [full]      | 2576  | No  | NA   | 0  | 0 | Not-determined | Genome-fragment | NA    | 0     |
| S5_vs_k141_7756           | [full]      | 1508  | No  | NA   | 0  | 0 | Low-quality    | Genome-fragment | 2.59  | 0     |
| S16_vs_49456              | [full]      | 1508  | No  | NA   | 0  | 1 | Low-quality    | Genome-fragment | 1.04  | 0     |
| S1_vs_k141_2151           | [full]      | 2079  | No  | NA   | 0  | 0 | Not-determined | Genome-fragment | NA    | 0     |
| S1_vs_k141_155183         | [full]      | 30775 | No  | NA   | 12 | 0 | Medium-quality | Genome-fragment | 74.09 | 0     |
| S10_extracted_95257       |             | 1508  | No  | NA   | 0  | 1 | Low-quality    | Genome-fragment | 1.01  | 0     |
| S8_vs_k141_177191         | [full]      | 1508  | No  | NA   | 0  | 0 | Low-quality    | Genome-fragment | 3.19  | 0     |
| S1_vs_k141_49565          | [full]      | 1146  | No  | NA   | 0  | 0 | Not-determined | Genome-fragment | NA    | 0     |
| S8_vs_k141_207314         | [full]      | 1508  | No  | NA   | 0  | 1 | Low-quality    | Genome-fragment | 0.92  | 0     |
| S1_vs_k141_102915         | [full]      | 1119  | No  | NA   | 0  | 0 | Not-determined | Genome-fragment | NA    | 0     |
| S17_extracted_k141_13378  |             | 1509  | No  | NA   | 0  | 0 | Low-quality    | Genome-fragment | 3.38  | 0     |
| S9_extracted_k141_76527   |             | 1509  | No  | NA   | 3  | 0 | Low-quality    | Genome-fragment | 2.32  | 0     |
| S11_vs_k141_53070         | [1/2]genome | 1509  | No  | NA   | 1  | 0 | Low-quality    | Genome-fragment | 1.74  | 0     |
| S14_extracted_k141_62150  |             | 1509  | No  | NA   | 1  | 0 | Low-quality    | Genome-fragment | 1.18  | 0     |
| S1_vs_k141_42883          | [full]      | 1064  | No  | NA   | 0  | 0 | Not-determined | Genome-fragment | NA    | 0     |
| S14_vs_k141_102751        | [full]      | 1509  | No  | NA   | 1  | 0 | Low-quality    | Genome-fragment | 4.42  | 0     |
| S16_vs_1782               | [full]      | 1509  | No  | NA   | 2  | 0 | Low-quality    | Genome-fragment | 2.51  | 0     |
| S10_extracted_15520       |             | 1509  | No  | NA   | 0  | 0 | Low-quality    | Genome-fragment | 2.66  | 0     |
| S1_vs_k141_49621          | [full]      | 1270  | No  | NA   | 0  | 2 | Not-determined | Genome-fragment | NA    | 0     |
| S1_vs_k141_9574           | [full]      | 2795  | No  | NA   | 0  | 3 | Not-determined | Genome-fragment | NA    | 0     |
| S1_vs_k141_9575           | [full]      | 1167  | No  | NA   | 0  | 0 | Not-determined | Genome-fragment | NA    | 0     |
| S12_extracted_k141_119422 |             | 1509  | No  | NA   | 1  | 0 | Low-quality    | Genome-fragment | 1.23  | 0     |
| S8_extracted_k141_14804   |             | 1509  | No  | NA   | 1  | 0 | Low-quality    | Genome-fragment | 1.41  | 0     |
| S1_vs_k141_9610           | [full]      | 3585  | No  | NA   | 0  | 0 | Not-determined | Genome-fragment | NA    | 0     |
| S1_vs_k141_103022         | [full]      | 1912  | No  | NA   | 0  | 1 | Not-determined | Genome-fragment | NA    | 0     |
| S8_vs_k141_151332         | [1/2]genome | 1509  | No  | NA   | 2  | 0 | Low-quality    | Genome-fragment | 4.17  | 0     |
| S1_vs_k141_22087          | [full]      | 2430  | No  | NA   | 0  | 0 | Not-determined | Genome-fragment | NA    | 0     |
| S1_vs_k141_83015          | [full]      | 1463  | No  | NA   | 0  | 2 | Not-determined | Genome-fragment | NA    | 0     |
| S9_extracted_k141_86608   |             | 1510  | No  | NA   | 0  | 0 | Low-quality    | Genome-fragment | 4.28  | 0     |
| S9_vs_k141_58730          | [full]      | 1510  | No  | NA   | 1  | 0 | Low-quality    | Genome-fragment | 2.96  | 0     |
| S14_extracted_k141_24935  |             | 1510  | No  | NA   | 0  | 0 | Low-quality    | Genome-fragment | 1.95  | 0     |
| S1_vs_k141_69490          | [full]      | 1618  | No  | NA   | 0  | 0 | Not-determined | Genome-fragment | NA    | 0     |
| S3_extracted_k141_60749   |             | 1510  | No  | NA   | 0  | 0 | Low-quality    | Genome-fragment | 1.45  | 0     |
| S3_vs_k141_47443          | [full]      | 1510  | No  | NA   | 0  | 0 | Low-quality    | Genome-fragment | 2.68  | 0     |
| S1_vs_k141_22716          | [full]      | 1264  | No  | NA   | 0  | 1 | Not-determined | Genome-fragment | NA    | 0     |
| S16_vs_40111              | [full]      | 1510  | No  | NA   | 0  | 1 | Low-quality    | Genome-fragment | 3.59  | 0     |
| S1_vs_k141_116400         | [full]      | 2516  | No  | NA   | 2  | 2 | Not-determined | Genome-fragment | NA    | 0     |
| S1_vs_k141_49763          | [full]      | 3479  | No  | NA   | 0  | 4 | Not-determined | Genome-fragment | NA    | 0     |
| S4_extracted_6674         |             | 1510  | No  | NA   | 0  | 2 | Low-quality    | Genome-fragment | 0.8   | 0     |
| S6_vs_k141_13214          | [full]      | 1510  | No  | NA   | 0  | 1 | Low-quality    | Genome-fragment | 2.98  | 0     |
| S17_vs_k141_45968         | [full]      | 1511  | No  | NA   | 0  | 0 | Low-quality    | Genome-fragment | 3.94  | 0     |
| S1_vs_k141_122805         | [full]      | 2984  | No  | NA   | 0  | 0 | Not-determined | Genome-fragment | NA    | 0     |
| S11_extracted_k141_75426  |             | 1511  | No  | NA   | 0  | 2 | Low-quality    | Genome-fragment | 2.54  | 0     |
| S13_extracted_87962       |             | 1511  | No  | NA   | 0  | 0 | Low-quality    | Genome-fragment | 0.95  | 0     |
| S14_extracted_k141_101845 |             | 1511  | No  | NA   | 0  | 0 | Low-quality    | Genome-fragment | 28.43 | 0     |
| S7_vs_42464               | [full]      | 1511  | No  | NA   | 1  | 0 | Low-quality    | Genome-fragment | 2.4   | 0     |
| S16_extracted_14795       |             | 1511  | No  | NA   | 0  | 0 | Low-quality    | Genome-fragment | 1.78  | 0     |
| S1_vs_k141_148101         | [full]      | 1629  | No  | NA   | 0  | 1 | Not-determined | Genome-fragment | NA    | 0     |
| S12_vs_k141_134462        | [full]      | 1511  | No  | NA   | 0  | 2 | Low-quality    | Genome-fragment | 2.98  | 0     |
| S1_vs_k141_89615          | [full]      | 1596  | No  | NA   | 0  | 0 | Not-determined | Genome-fragment | NA    | 0     |
| S2_extracted_k141_16549   |             | 1511  | No  | NA   | 0  | 0 | Low-quality    | Genome-fragment | 2.47  | 0     |
| S11_extracted_k141_66322  |             | 1512  | No  | NA   | 0  | 1 | Low-quality    | Genome-fragment | 0.44  | 0     |
| S11_extracted_k141_34466  |             | 1512  | No  | NA   | 0  | 1 | Low-quality    | Genome-fragment | 0.86  | 0     |
| S1_vs_k141_81214          | [full]      | 1125  | No  | NA   | 0  | 0 | Not-determined | Genome-fragment | NA    | 0     |
| S11_vs_k141_94560         | [full]      | 1512  | No  | NA   | 0  | 0 | Low-quality    | Genome-fragment | 2.55  | 0     |
| S1_vs_k141_81792          | [full]      | 1716  | No  | NA   | 0  | 2 | Not-determined | Genome-fragment | NA    | 0     |
| S13_vs_477                | [full]      | 1512  | No  | NA   | 0  | 0 | Low-quality    | Genome-fragment | 3.01  | 0     |
| S1_vs_k141_35758          | [full]      | 1313  | No  | NA   | 0  | 2 | Not-determined | Genome-fragment | NA    | 0     |
| S14_extracted_k141_25133  |             | 1512  | No  | NA   | 4  | 0 | Low-quality    | Genome-fragment | 4.99  | 0     |
| S1_vs_k141_134022         | [1/2]genome | 1512  | No  | NA   | 1  | 0 | Low-quality    | Genome-fragment | 3.5   | 0     |
| S1_vs_k141_122871         | [full]      | 6345  | No  | NA   | 0  | 2 | Not-determined | Genome-fragment | NA    | 0     |
| S1_vs_k141_136355         | [full]      | 6819  | No  | NA   | 0  | 3 | Not-determined | Genome-fragment | NA    | 0     |
| S1_vs_k141_16370          | [full]      | 2720  | No  | NA   | 0  | 1 | Not-determined | Genome-fragment | NA    | 0     |
| S1_vs_k141_16880          | [full]      | 1065  | No  | NA   | 1  | 1 | Not-determined | Genome-fragment | NA    | 0     |
| S5_vs_k141_79812          | [full]      | 1512  | No  | NA   | 1  | 0 | Low-quality    | Genome-fragment | 2.8   | 0     |
| S16_vs_80406              | [full]      | 1512  | No  | NA   | 1  | 0 | Low-quality    | Genome-fragment | 1.67  | 0     |
| S1_vs_k141_16420          | [full]      | 1136  | No  | NA   | 0  | 0 | Not-determined | Genome-fragment | NA    | 0     |
| S1_vs_k141_61824          | [full]      | 3488  | No  | NA   | 0  | 1 | Not-determined | Genome-fragment | NA    | 0     |
| S16_vs_116577             | [full]      | 1512  | No  | NA   | 0  | 1 | Low-quality    | Genome-fragment | 0.99  | 0     |
| S1_vs_k141_15773          | [full]      | 1465  | No  | NA   | 0  | 1 | Not-determined | Genome-fragment | NA    | 0     |
| S10_vs_55748              | [full]      | 1512  | No  | NA   | 0  | 2 | Low-quality    | Genome-fragment | 0.66  | 0     |
| S8_vs_k141_85406          | [full]      | 1512  | Yes | 1017 | 1  | 1 | Low-quality    | Genome-fragment | 2.13  | 32.74 |
| S17_extracted_k141_106256 |             | 1513  | No  | NA   | 0  | 0 | Low-quality    | Genome-fragment | 2.67  | 0     |
| S1_vs_k141_1550           | [full]      | 1699  | No  | NA   | 0  | 0 | Not-determined | Genome-fragment | NA    | 0     |
| S1_vs_k141_69668          | [full]      | 1900  | No  | NA   | 0  | 3 | Not-determined | Genome-fragment | NA    | 0     |
| S17_vs_k141_138661        | [full]      | 1513  | No  | NA   | 2  | 0 | Low-quality    | Genome-fragment | 2.32  | 0     |
| S1_vs_k141_9710           | [full]      | 4595  | No  | NA   | 0  | 1 | Not-determined | Genome-fragment | NA    | 0     |
| S14_extracted_k141_39046  |             | 1513  | No  | NA   | 3  | 0 | Low-quality    | Genome-fragment | 4.99  | 0     |
| S14_extracted_k141_15919  |             | 1513  | No  | NA   | 0  | 1 | Low-quality    | Genome-fragment | 0.28  | 0     |
| S1_vs_k141_61897          | [full]      | 1454  | No  | NA   | 0  | 0 | Not-determined | Genome-fragment | NA    | 0     |
| S5_extracted_k141_135065  |             | 1513  | No  | NA   | 0  | 0 | Low-quality    | Genome-fragment | 0.14  | 0     |
| S5_vs_k141_90054          | [full]      | 1513  | No  | NA   | 0  | 0 | Low-quality    | Genome-fragment | 11.18 | 0     |
| S7_extracted_100045       |             | 1513  | No  | NA   | 2  | 0 | Low-quality    | Genome-fragment | 1.09  | 0     |
| S1_vs_k141_103121         | [full]      | 4678  | No  | NA   | 0  | 1 | Not-determined | Genome-fragment | NA    | 0     |
| S1_vs_k141_22905          | [full]      | 2038  | No  | NA   | 0  | 3 | Not-determined | Genome-fragment | NA    | 0     |
| S7_vs_47417               | [1/2]genome | 1513  | No  | NA   | 2  | 0 | Low-quality    | Genome-fragment | 3     | 0     |
| S1_vs_k141_122999         | [full]      | 1444  | No  | NA   | 0  | 1 | Not-determined | Genome-fragment | NA    | 0     |
| S10_vs_74095              | [full]      | 1513  | No  | NA   | 0  | 0 | Low-quality    | Genome-fragment | 3.27  | 0     |
| S1_vs_k141_61947          | [full]      | 5430  | No  | NA   | 0  | 2 | Not-determined | Genome-fragment | NA    | 0     |
| S11_extracted_k141_41664  |             | 1514  | No  | NA   | 0  | 0 | Low-quality    | Genome-fragment | 2.44  | 0     |
| S1_vs_k141_29833          | [full]      | 4086  | No  | NA   | 0  | 1 | Not-determined | Genome-fragment | NA    | 0     |
| S13_extracted_131317      |             | 1514  | No  | NA   | 0  | 3 | Low-quality    | Genome-fragment | 0.26  | 0     |
| S1_vs_k141_129979         | [full]      | 1565  | No  | NA   | 0  | 1 | Not-determined | Genome-fragment | NA    | 0     |
| S13_vs_131210             | [full]      | 1514  | No  | NA   | 1  | 0 | Low-quality    | Genome-fragment | 2.35  | 0     |
| S14_vs_k141_25384         | [full]      | 1514  | No  | NA   | 0  | 0 | Low-quality    | Genome-fragment | 3.54  | 0     |
| S1_vs_k141_123034         | [full]      | 1832  | No  | NA   | 0  | 2 | Not-determined | Genome-fragment | NA    | 0     |
| S1_vs_k141_116699         | [full]      | 1267  | No  | NA   | 0  | 2 | Not-determined | Genome-fragment | NA    | 0     |
| S1_extracted_k141_102363  |             | 1514  | No  | NA   | 0  | 1 | Low-quality    | Genome-fragment | 1.11  | 0     |
| S1_extracted_k141_147906  |             | 1514  | Yes | 1220 | 1  | 2 | Low-quality    | Genome-fragment | 2.53  | 19.42 |
| S1_vs_k141_14779          | [full]      |       |     |      |    |   |                |                 |       |       |



|                           |          |       |    |    |    |   |                |                 |       |   |
|---------------------------|----------|-------|----|----|----|---|----------------|-----------------|-------|---|
| 56_vs_k141_86360          | [full]   | 1515  | No | NA | 2  | 0 | Low-quality    | Genome-fragment | 3.04  | 0 |
| 51_vs_k141_33575          | [full]   | 1568  | No | NA | 0  | 1 | Not-determined | Genome-fragment | NA    | 0 |
| 56_vs_k141_55606          | [full]   | 1515  | No | NA | 0  | 0 | Low-quality    | Genome-fragment | 2.57  | 0 |
| 58_extracted_k141_65820   |          | 1515  | No | NA | 0  | 1 | Low-quality    | Genome-fragment | 2.53  | 0 |
| 51_vs_k141_9697           | [full]   | 1080  | No | NA | 0  | 0 | Not-determined | Genome-fragment | NA    | 0 |
| 51_vs_k141_83594          | [full]   | 1122  | No | NA | 0  | 0 | Not-determined | Genome-fragment | NA    | 0 |
| 51_vs_k141_136718         | [full]   | 1743  | No | NA | 0  | 1 | Not-determined | Genome-fragment | NA    | 0 |
| 58_extracted_k141_137477  |          | 1515  | No | NA | 0  | 0 | Low-quality    | Genome-fragment | 2.3   | 0 |
| 51_vs_k141_30131          | [full]   | 1692  | No | NA | 0  | 1 | Not-determined | Genome-fragment | NA    | 0 |
| 517_vs_k141_138439        | [full]   | 1516  | No | NA | 1  | 0 | Low-quality    | Genome-fragment | 3.18  | 0 |
| 59_vs_k141_35276          | [full]   | 1516  | No | NA | 2  | 0 | Low-quality    | Genome-fragment | 4.48  | 0 |
| 511_extracted_k141_59809  |          | 1516  | No | NA | 0  | 0 | Low-quality    | Genome-fragment | 2.41  | 0 |
| 511_extracted_k141_79842  |          | 1516  | No | NA | 0  | 0 | Low-quality    | Genome-fragment | 2.4   | 0 |
| 513_vs_131640             | [full]   | 1516  | No | NA | 0  | 0 | Low-quality    | Genome-fragment | 2.92  | 0 |
| 51_vs_k141_9697           | [full]   | 3369  | No | NA | 0  | 3 | Not-determined | Genome-fragment | NA    | 0 |
| 514_vs_k141_115430        | [full]   | 1516  | No | NA | 0  | 1 | Low-quality    | Genome-fragment | 4.02  | 0 |
| 51_vs_k141_136781         | [full]   | 2173  | No | NA | 0  | 2 | Not-determined | Genome-fragment | NA    | 0 |
| 51_vs_k141_90107          | [full]   | 1816  | No | NA | 0  | 3 | Not-determined | Genome-fragment | NA    | 0 |
| 51_vs_k141_9902           | [full]   | 1516  | No | NA | 0  | 1 | Low-quality    | Genome-fragment | 1     | 0 |
| 51_vs_k141_83704          | [full]   | 2296  | No | NA | 0  | 1 | Not-determined | Genome-fragment | NA    | 0 |
| 55_vs_k141_122627         | [full]   | 1516  | No | NA | 0  | 0 | Low-quality    | Genome-fragment | 3.87  | 0 |
| 57_extracted_38846        |          | 1516  | No | NA | 0  | 1 | Low-quality    | Genome-fragment | 1.19  | 0 |
| 57_vs_37889               | [full]   | 1516  | No | NA | 1  | 0 | Low-quality    | Genome-fragment | 5.99  | 0 |
| 51_vs_k141_136821         | [full]   | 1554  | No | NA | 0  | 2 | Not-determined | Genome-fragment | NA    | 0 |
| 516_extracted_82701       |          | 1516  | No | NA | 0  | 0 | Low-quality    | Genome-fragment | 4.18  | 0 |
| 512_extracted_k141_138605 |          | 1516  | No | NA | 1  | 0 | Low-quality    | Genome-fragment | 2.22  | 0 |
| 54_extracted_7485         |          | 1516  | No | NA | 5  | 0 | Low-quality    | Genome-fragment | 5.01  | 0 |
| 51_vs_k141_50446          | [full]   | 2252  | No | NA | 0  | 2 | Not-determined | Genome-fragment | NA    | 0 |
| 54_extracted_4890         |          | 1516  | No | NA | 0  | 0 | Low-quality    | Genome-fragment | 2.15  | 0 |
| 51_vs_k141_136903         | [full]   | 2033  | No | NA | 0  | 3 | Not-determined | Genome-fragment | NA    | 0 |
| 58_vs_k141_55708          | [full]   | 1516  | No | NA | 0  | 1 | Low-quality    | Genome-fragment | 1.78  | 0 |
| 51_vs_k141_123489         | [full]   | 1525  | No | NA | 0  | 1 | Not-determined | Genome-fragment | NA    | 0 |
| 51_vs_k141_103765         | [full]   | 1406  | No | NA | 0  | 0 | Not-determined | Genome-fragment | NA    | 0 |
| 51_vs_k141_17466          | [full]   | 6817  | No | NA | 0  | 1 | Not-determined | Genome-fragment | NA    | 0 |
| 517_vs_k141_104025        | [full]   | 1517  | No | NA | 0  | 0 | Low-quality    | Genome-fragment | 3.44  | 0 |
| 511_extracted_k141_86595  |          | 1517  | No | NA | 0  | 0 | Low-quality    | Genome-fragment | 3.58  | 0 |
| 51_vs_k141_23408          | [full]   | 1247  | No | NA | 0  | 2 | Not-determined | Genome-fragment | NA    | 0 |
| 51_vs_k141_62409          | [full]   | 16910 | No | NA | 10 | 0 | Medium-quality | Genome-fragment | 50    | 0 |
| 51_vs_k141_90265          | [full]   | 1958  | No | NA | 0  | 2 | Not-determined | Genome-fragment | NA    | 0 |
| 51_vs_k141_136968         | [full]   | 2037  | No | NA | 0  | 1 | Not-determined | Genome-fragment | NA    | 0 |
| 511_vs_k141_42277         | [full]   | 1517  | No | NA | 0  | 0 | Low-quality    | Genome-fragment | 3.64  | 0 |
| 514_extracted_k141_56246  |          | 1517  | No | NA | 0  | 0 | Low-quality    | Genome-fragment | 0.66  | 0 |
| 51_vs_k141_103839         | [full]   | 2894  | No | NA | 0  | 1 | Not-determined | Genome-fragment | NA    | 0 |
| 51_vs_k141_76279          | [full]   | 1517  | No | NA | 0  | 1 | Low-quality    | Genome-fragment | 3.19  | 0 |
| 51_vs_k141_136883         | [full]   | 2299  | No | NA | 0  | 2 | Not-determined | Genome-fragment | NA    | 0 |
| 51_vs_k141_57082          | [full]   | 2186  | No | NA | 0  | 2 | Not-determined | Genome-fragment | NA    | 0 |
| 51_vs_k141_90305          | [full]   | 1158  | No | NA | 0  | 0 | Not-determined | Genome-fragment | NA    | 0 |
| 53_vs_k141_72060          | [full]   | 1517  | No | NA | 0  | 0 | Low-quality    | Genome-fragment | 3.83  | 0 |
| 53_vs_k141_90447          | [full]   | 1517  | No | NA | 0  | 0 | Low-quality    | Genome-fragment | 3.39  | 0 |
| 51_vs_k141_23540          | [full]   | 2698  | No | NA | 0  | 3 | Not-determined | Genome-fragment | NA    | 0 |
| 55_vs_k141_35102          | [full]   | 1517  | No | NA | 0  | 0 | Low-quality    | Genome-fragment | 2.53  | 0 |
| 57_vs_29504               | [H2gene] | 1517  | No | NA | 0  | 0 | Low-quality    | Genome-fragment | 2.13  | 0 |
| 51_vs_k141_97324          | [full]   | 5349  | No | NA | 0  | 0 | Not-determined | Genome-fragment | NA    | 0 |
| 51_vs_k141_143608         | [full]   | 1472  | No | NA | 0  | 1 | Not-determined | Genome-fragment | NA    | 0 |
| 51_vs_k141_17203          | [full]   | 1673  | No | NA | 0  | 0 | Not-determined | Genome-fragment | NA    | 0 |
| 516_extracted_126825      |          | 1517  | No | NA | 0  | 0 | Low-quality    | Genome-fragment | 0.99  | 0 |
| 51_vs_k141_50650          | [full]   | 1189  | No | NA | 0  | 0 | Not-determined | Genome-fragment | NA    | 0 |
| 516_extracted_153967      |          | 1517  | No | NA | 0  | 0 | Low-quality    | Genome-fragment | NA    | 0 |
| 516_vs_105753             | [full]   | 1517  | No | NA | 0  | 0 | Low-quality    | Genome-fragment | 2.32  | 0 |
| 51_vs_k141_97370          | [full]   | 1332  | No | NA | 0  | 1 | Not-determined | Genome-fragment | NA    | 0 |
| 510_vs_112725             | [full]   | 1517  | No | NA | 0  | 0 | Low-quality    | Genome-fragment | 2.54  | 0 |
| 51_vs_k141_70084          | [full]   | 2742  | No | NA | 0  | 2 | Not-determined | Genome-fragment | NA    | 0 |
| 51_vs_k141_130612         | [full]   | 1330  | No | NA | 0  | 0 | Not-determined | Genome-fragment | NA    | 0 |
| 51_vs_k141_117317         | [full]   | 33680 | No | NA | 14 | 1 | Medium-quality | Genome-fragment | 81.81 | 0 |
| 51_vs_k141_34004          | [full]   | 1200  | No | NA | 0  | 2 | Not-determined | Genome-fragment | NA    | 0 |
| 512_extracted_k141_4720   |          | 1517  | No | NA | 0  | 2 | Low-quality    | Genome-fragment | 1.19  | 0 |
| 515_vs_50157              | [full]   | 1517  | No | NA | 0  | 0 | Low-quality    | Genome-fragment | 3.3   | 0 |
| 51_vs_k141_143727         | [full]   | 1586  | No | NA | 0  | 2 | Not-determined | Genome-fragment | NA    | 0 |
| 51_vs_k141_137204         | [full]   | 5350  | No | NA | 0  | 2 | Not-determined | Genome-fragment | NA    | 0 |
| 517_extracted_k141_134575 |          | 1518  | No | NA | 0  | 2 | Low-quality    | Genome-fragment | 3.34  | 0 |
| 51_vs_k141_17717          | [full]   | 1344  | No | NA | 0  | 1 | Not-determined | Genome-fragment | NA    | 0 |
| 59_vs_k141_66191          | [H2gene] | 1518  | No | NA | 0  | 0 | Low-quality    | Genome-fragment | 3.97  | 0 |
| 513_extracted_122436      |          | 1518  | No | NA | 0  | 0 | Low-quality    | Genome-fragment | 2.08  | 0 |
| 51_vs_k141_12672          | [full]   | 1864  | No | NA | 0  | 1 | Not-determined | Genome-fragment | NA    | 0 |
| 513_extracted_125844      |          | 1518  | No | NA | 1  | 0 | Low-quality    | Genome-fragment | 0.86  | 0 |
| 53_extracted_k141_29674   |          | 1518  | No | NA | 1  | 0 | Low-quality    | Genome-fragment | 3.77  | 0 |
| 516_vs_28928              | [full]   | 1518  | No | NA | 0  | 0 | Low-quality    | Genome-fragment | 3.15  | 0 |
| 510_vs_119265             | [full]   | 1518  | No | NA | 0  | 0 | Low-quality    | Genome-fragment | 0.9   | 0 |
| 512_vs_k141_156235        | [full]   | 1518  | No | NA | 0  | 0 | Low-quality    | Genome-fragment | 3.22  | 0 |
| 56_vs_k141_26883          | [full]   | 1518  | No | NA | 0  | 2 | Low-quality    | Genome-fragment | 0.43  | 0 |
| 59_vs_k141_20884          | [full]   | 1519  | No | NA | 0  | 2 | Low-quality    | Genome-fragment | 1.36  | 0 |
| 513_extracted_141715      |          | 1519  | No | NA | 0  | 0 | Low-quality    | Genome-fragment | 3.32  | 0 |
| 51_vs_k141_70228          | [full]   | 1086  | No | NA | 0  | 1 | Not-determined | Genome-fragment | NA    | 0 |
| 51_vs_k141_23682          | [full]   | 44452 | No | NA | 18 | 0 | High-quality   | High-quality    | 100   | 0 |
| 51_vs_k141_30728          | [full]   | 2108  | No | NA | 0  | 2 | Not-determined | Genome-fragment | NA    | 0 |
| 51_vs_k141_99699          | [full]   | 1519  | No | NA | 0  | 0 | Low-quality    | Genome-fragment | 2.05  | 0 |
| 57_vs_34665               | [full]   | 1519  | No | NA | 0  | 0 | Low-quality    | Genome-fragment | 2.51  | 0 |
| 51_vs_k141_148660         | [full]   | 1240  | No | NA | 0  | 0 | Not-determined | Genome-fragment | NA    | 0 |
| 57_vs_109847              | [full]   | 1519  | No | NA | 0  | 0 | Low-quality    | Genome-fragment | 2.82  | 0 |
| 51_vs_144825              | [full]   | 1519  | No | NA | 0  | 0 | Low-quality    | Genome-fragment | 0.81  | 0 |
| 58_vs_k141_155462         | [H2gene] | 1519  | No | NA | 1  | 0 | Low-quality    | Genome-fragment | 1.4   | 0 |
| 51_vs_k141_3171           | [full]   | 1220  | No | NA | 0  | 0 | Not-determined | Genome-fragment | NA    | 0 |
| 51_vs_k141_104138         | [full]   | 1486  | No | NA | 0  | 2 | Not-determined | Genome-fragment | NA    | 0 |
| 51_vs_k141_10846          | [full]   | 2422  | No | NA | 0  | 2 | Not-determined | Genome-fragment | NA    | 0 |
| 51_vs_k141_36520          | [full]   | 2897  | No | NA | 0  | 2 | Not-determined | Genome-fragment | NA    | 0 |
| 51_vs_k141_143860         | [full]   | 1510  | No | NA | 0  | 1 | Not-determined | Genome-fragment | NA    | 0 |
| 514_extracted_k141_114789 |          | 1520  | No | NA | 0  | 1 | Low-quality    | Genome-fragment | 3.67  | 0 |
| 51_vs_k141_17870          | [full]   | 4203  | No | NA | 0  | 3 | Not-determined | Genome-fragment | NA    | 0 |
| 514_vs_k141_116315        | [full]   | 1520  | No | NA | 0  | 0 | Low-quality    | Genome-fragment | 0.87  | 0 |
| 51_vs_k141_63844          | [full]   | 1520  | No | NA | 0  | 2 | Low-quality    | Genome-fragment | 3.39  | 0 |
| 53_extracted_k141_62122   |          | 1520  | No | NA | 0  | 0 | Low-quality    | Genome-fragment | 1     | 0 |
| 51_vs_k141_113054         | [full]   | 1520  | No | NA | 0  | 0 | Low-quality    | Genome-fragment | 0.58  | 0 |
| 51_vs_k141_143887         | [full]   | 1781  | No | NA | 0  | 2 | Not-determined | Genome-fragment | NA    | 0 |
| 55_vs_k141_9629           | [full]   | 1520  | No | NA | 0  | 0 | Low-quality    | Genome-fragment | 1.67  | 0 |
| 57_vs_37071               | [full]   | 1520  | No | NA | 0  | 0 | Low-quality    | Genome-fragment | NA    | 0 |
| 51_vs_k141_110783         | [full]   | 3131  | No | NA | 0  | 4 | Not-determined | Genome-fragment | NA    | 0 |
| 57_vs_96117               | [H2gene] | 1520  | No | NA | 2  | 0 | Low-quality    | Genome-fragment | 3.19  | 0 |
| 516_vs_17592              | [full]   | 1520  | No | NA | 0  | 0 | Low-quality    | Genome-fragment | 3.48  | 0 |
| 51_vs_k141_104200         | [full]   | 9414  | No | NA | 0  | 7 | Not-determined | Genome-fragment | NA    | 0 |
| 51_vs_k141_97681          | [full]   | 3520  | No | NA | 0  | 4 | Not-determined | Genome-fragment | NA    | 0 |
| 51_vs_k141_17509          | [full]   | 2709  | No | NA | 0  | 1 | Not-determined | Genome-fragment | NA    | 0 |
| 51_vs_k141_36584          | [full]   | 1304  | No | NA | 0  | 2 | Not-determined | Genome-fragment | NA    | 0 |
| 58_vs_k141_168086         | [full]   | 1520  | No | NA | 0  | 1 | Low-quality    | Genome-fragment | 0.93  | 0 |
| 51_vs_k141_10967          | [full]   | 3492  | No | NA | 0  | 0 | Not-determined | Genome-fragment | NA    | 0 |
| 51_vs_k141_123896         | [full]   | 2760  | No | NA | 0  | 2 | Not-determined | Genome-fragment | NA    | 0 |
| 58_vs_k141_172806         | [full]   | 1520  | No | NA | 0  | 0 | Low-quality    | Genome-fragment | 4.09  | 0 |
| 514_vs_k141_55848         | [full]   | 1521  | No | NA | 2  | 0 | Low-quality    | Genome-fragment | 3.03  | 0 |
| 51_vs_k141_1267           | [full]   | 4887  | No | NA | 0  | 0 | High-quality   | High-quality    | 100   | 0 |
| 51_vs_k141_130862         | [full]   | 4747  | No | NA | 0  | 1 | Not-determined | Genome-fragment | NA    | 0 |
| 514_vs_k141_15333         | [H2gene] | 1521  | No | NA | 1  | 0 | Low-quality    | Genome-fragment | 2.6   | 0 |
| 51_vs_k141_10979          | [full]   | 1150  | No | NA | 0  | 1 | Not-determined | Genome-fragment | NA    | 0 |
| 53_extracted_k141_35200   |          | 1521  | No | NA | 0  | 0 | Low-quality    | Genome-fragment | 2.49  | 0 |
| 53_extracted_k141_110388  |          | 1521  | No | NA | 0  | 0 | Low-quality    | Genome-fragment | 4.32  | 0 |
| 51_vs_k141_35215          | [H2gene] | 1521  | No | NA | 2  | 0 | Low-quality    | Genome-fragment | 2.64  | 0 |
| 51_vs_k141_11523          | [H2gene] | 1521  | No | NA | 0  | 0 | Low-quality    | Genome-fragment | 1.05  | 0 |
| 51_vs_k141_90786          | [full]   | 2073  | No | NA | 0  | 0 | Not-determined | Genome-fragment | NA    | 0 |
| 51_vs_k141_123934         | [full]   | 1227  | No | NA | 0  | 1 | Not-determined | Genome-fragment | NA    | 0 |
| 55_vs_k141_98521          | [full]   | 1521  | No | NA | 0  | 0 | Low-quality    | Genome-fragment | 4.84  | 0 |
| 55_vs_k141_82157          | [full]   | 1521  | No | NA | 0  | 2 | Low-quality    | Genome-fragment | 0.87  | 0 |
| 51_vs_k141_84346          | [full]   | 2157  | No | NA | 0  | 0 | Not-determined | Genome-fragment | NA    | 0 |
| 51_vs_k141_123953         | [full]   | 5516  | No | NA | 0  | 2 | Not-determined | Genome-fragment | NA    | 0 |
| 57_extracted_30020        |          | 1521  | No | NA | 1  | 0 | Low-quality    | Genome-fragment | 3.53  | 0 |
| 57_vs_105470              | [full]   | 1521  | No | NA | 0  | 0 | Low-quality    | Genome-fragment | 3.42  | 0 |
| 51_vs_k141_23996          | [full]   | 1090  | No | NA | 0  | 0 | Not-determined | Genome-fragment | NA    | 0 |
| 51_vs_k141_97796          | [full]   | 3099  | No | NA | 0  | 1 | Not-determined | Genome-fragment | NA    | 0 |
| 516_extracted_61554       |          | 1521  | No | NA | 0  | 1 | Low-quality    | Genome-fragment | 1.01  | 0 |
| 51_vs_k141_44358          | [full]   | 3030  | No | NA | 0  | 1 | Not-determined | Genome-fragment | NA    | 0 |
| 516_vs_76370              | [full]   | 1521  | No | NA | 0  | 0 | Low-quality    | Genome-fragment | 3     |   |



|                           |           |      |    |    |   |   |                |                 |    |       |   |
|---------------------------|-----------|------|----|----|---|---|----------------|-----------------|----|-------|---|
| S1_vs_k141_57750          | [full]    | 1623 | No | NA | 0 | 2 | Not-determined | Genome-fragment | NA | 3.56  | 0 |
| S17_vs_k141_160776        | [full]    | 1523 | No | NA | 1 | 0 | Low-quality    | Genome-fragment | NA | 3.5   | 0 |
| S11_vs_k141_17483         | [112gene] | 1523 | No | NA | 0 | 0 | Low-quality    | Genome-fragment | NA | 3.45  | 0 |
| S1_vs_k141_44585          | [full]    | 1697 | No | NA | 0 | 2 | Not-determined | Genome-fragment | NA | 0     | 0 |
| S1_vs_k141_111186         | [full]    | 4673 | No | NA | 0 | 2 | Not-determined | Genome-fragment | NA | 0     | 0 |
| S1_vs_k141_70560          | [full]    | 2109 | No | NA | 1 | 1 | Not-determined | Genome-fragment | NA | 0.66  | 0 |
| S11_vs_k141_69248         | [112gene] | 1523 | No | NA | 1 | 0 | Low-quality    | Genome-fragment | NA | 2.82  | 0 |
| S1_vs_k141_18329          | [full]    | 1737 | No | NA | 0 | 1 | Not-determined | Genome-fragment | NA | 0     | 0 |
| S14_vs_k141_59846         | [full]    | 1523 | No | NA | 0 | 1 | Low-quality    | Genome-fragment | NA | 3.24  | 0 |
| S14_vs_k141_105967        | [full]    | 1523 | No | NA | 1 | 0 | Low-quality    | Genome-fragment | NA | 3.3   | 0 |
| S3_vs_k141_101397         | [full]    | 1523 | No | NA | 1 | 0 | Low-quality    | Genome-fragment | NA | 3.26  | 0 |
| S5_vs_k141_17888          | [full]    | 1523 | No | NA | 2 | 2 | Low-quality    | Genome-fragment | NA | 1.03  | 0 |
| S7_extracted_28804        | [full]    | 1523 | No | NA | 0 | 1 | Low-quality    | Genome-fragment | NA | 0.49  | 0 |
| S7_vs_50445               | [full]    | 1523 | No | NA | 2 | 0 | Low-quality    | Genome-fragment | NA | 3.23  | 0 |
| S16_vs_88394              | [full]    | 1523 | No | NA | 0 | 2 | Low-quality    | Genome-fragment | NA | 1.67  | 0 |
| S10_extracted_108848      | [full]    | 1523 | No | NA | 1 | 0 | Low-quality    | Genome-fragment | NA | 0.66  | 0 |
| S12_extracted_k141_885    | [full]    | 1523 | No | NA | 1 | 0 | Low-quality    | Genome-fragment | NA | 1.6   | 0 |
| S12_vs_k141_103781        | [full]    | 1523 | No | NA | 0 | 0 | Low-quality    | Genome-fragment | NA | 3.48  | 0 |
| S1_vs_k141_18362          | [full]    | 1450 | No | NA | 1 | 1 | Not-determined | Genome-fragment | NA | 2.55  | 0 |
| S1_vs_k141_144309         | [full]    | 1532 | No | NA | 0 | 0 | Not-determined | Genome-fragment | NA | 0     | 0 |
| S12_vs_k141_86440         | [112gene] | 1523 | No | NA | 2 | 0 | Low-quality    | Genome-fragment | NA | 4.04  | 0 |
| S1_vs_k141_144333         | [full]    | 4378 | No | NA | 0 | 2 | Not-determined | Genome-fragment | NA | 0     | 0 |
| S1_vs_k141_104662         | [full]    | 2357 | No | NA | 0 | 0 | Not-determined | Genome-fragment | NA | 0     | 0 |
| S17_extracted_k141_74802  | [full]    | 1524 | No | NA | 1 | 0 | Low-quality    | Genome-fragment | NA | 6.96  | 0 |
| S1_vs_k141_118032         | [full]    | 3684 | No | NA | 0 | 2 | Not-determined | Genome-fragment | NA | 0     | 0 |
| S1_vs_k141_137897         | [full]    | 1250 | No | NA | 0 | 2 | Not-determined | Genome-fragment | NA | 0     | 0 |
| S1_vs_k141_124297         | [full]    | 2345 | No | NA | 0 | 2 | Not-determined | Genome-fragment | NA | 0     | 0 |
| S17_vs_k141_22103         | [full]    | 1524 | No | NA | 1 | 0 | Low-quality    | Genome-fragment | NA | 0.88  | 0 |
| S11_vs_k141_80357         | [full]    | 1524 | No | NA | 1 | 0 | Low-quality    | Genome-fragment | NA | 3.1   | 0 |
| S3_extracted_k141_404     | [full]    | 1524 | No | NA | 1 | 0 | Low-quality    | Genome-fragment | NA | 2.19  | 0 |
| S16_extracted_8505        | [full]    | 1524 | No | NA | 0 | 0 | Low-quality    | Genome-fragment | NA | 2.73  | 0 |
| S16_vs_116417             | [full]    | 1524 | No | NA | 3 | 1 | Low-quality    | Genome-fragment | NA | 0.8   | 0 |
| S1_vs_k141_24387          | [full]    | 2405 | No | NA | 0 | 2 | Not-determined | Genome-fragment | NA | 0     | 0 |
| S12_vs_k141_139479        | [full]    | 1524 | No | NA | 1 | 0 | Low-quality    | Genome-fragment | NA | 3.1   | 0 |
| S8_vs_k141_15379          | [full]    | 1524 | No | NA | 0 | 0 | Low-quality    | Genome-fragment | NA | 1.55  | 0 |
| S17_extracted_k141_59286  | [full]    | 1525 | No | NA | 0 | 0 | Low-quality    | Genome-fragment | NA | 0.8   | 0 |
| S1_vs_k141_31365          | [full]    | 1116 | No | NA | 0 | 1 | Not-determined | Genome-fragment | NA | 0     | 0 |
| S9_vs_k141_2296           | [full]    | 1525 | No | NA | 0 | 0 | Low-quality    | Genome-fragment | NA | 3.4   | 0 |
| S1_vs_k141_51270          | [full]    | 8290 | No | NA | 1 | 0 | Not-determined | Genome-fragment | NA | 53.58 | 0 |
| S1_vs_k141_37065          | [full]    | 2009 | No | NA | 0 | 2 | Not-determined | Genome-fragment | NA | 0     | 0 |
| S1_vs_k141_7807           | [full]    | 2707 | No | NA | 0 | 1 | Not-determined | Genome-fragment | NA | 0     | 0 |
| S11_vs_k141_44993         | [full]    | 1525 | No | NA | 0 | 0 | Low-quality    | Genome-fragment | NA | 2.39  | 0 |
| S1_vs_k141_106515         | [full]    | 1525 | No | NA | 0 | 0 | Low-quality    | Genome-fragment | NA | 2.99  | 0 |
| S5_vs_k141_23192          | [full]    | 1525 | No | NA | 3 | 0 | Low-quality    | Genome-fragment | NA | 4.28  | 0 |
| S7_extracted_16739        | [full]    | 1525 | No | NA | 0 | 0 | Low-quality    | Genome-fragment | NA | 3.23  | 0 |
| S16_extracted_152213      | [full]    | 1525 | No | NA | 0 | 1 | Low-quality    | Genome-fragment | NA | 0.15  | 0 |
| S16_vs_116233             | [full]    | 1525 | No | NA | 0 | 0 | Low-quality    | Genome-fragment | NA | 3.73  | 0 |
| S12_vs_k141_134991        | [full]    | 1525 | No | NA | 1 | 0 | Low-quality    | Genome-fragment | NA | 4.53  | 0 |
| S1_vs_k141_86153          | [full]    | 1791 | No | NA | 3 | 1 | Not-determined | Genome-fragment | NA | 0     | 0 |
| S6_vs_k141_8754           | [full]    | 1525 | No | NA | 0 | 0 | Low-quality    | Genome-fragment | NA | 2.08  | 0 |
| S1_vs_k141_156131         | [full]    | 1377 | No | NA | 0 | 1 | Not-determined | Genome-fragment | NA | 0     | 0 |
| S1_vs_k141_58210          | [full]    | 1559 | No | NA | 0 | 0 | Not-determined | Genome-fragment | NA | 3.52  | 0 |
| S1_vs_k141_3742           | [full]    | 1401 | No | NA | 0 | 0 | Not-determined | Genome-fragment | NA | 0     | 0 |
| S1_vs_k141_111419         | [full]    | 1431 | No | NA | 0 | 2 | Not-determined | Genome-fragment | NA | 0     | 0 |
| S12_extracted_352195      | [full]    | 1526 | No | NA | 0 | 0 | Low-quality    | Genome-fragment | NA | 1.62  | 0 |
| S13_vs_56702              | [full]    | 1526 | No | NA | 0 | 1 | Low-quality    | Genome-fragment | NA | 1.46  | 0 |
| S1_vs_k141_98239          | [full]    | 1160 | No | NA | 0 | 0 | Not-determined | Genome-fragment | NA | 0     | 0 |
| S1_vs_k141_101707         | [full]    | 1526 | No | NA | 0 | 1 | Low-quality    | Genome-fragment | NA | 2.35  | 0 |
| S1_vs_k141_68634          | [full]    | 1526 | No | NA | 0 | 1 | Low-quality    | Genome-fragment | NA | 0     | 0 |
| S1_vs_k141_69082          | [full]    | 1526 | No | NA | 2 | 0 | Low-quality    | Genome-fragment | NA | 2.51  | 0 |
| S1_vs_k141_147045         | [112gene] | 1526 | No | NA | 1 | 0 | Low-quality    | Genome-fragment | NA | 3.38  | 0 |
| S3_extracted_k141_9963    | [full]    | 1526 | No | NA | 1 | 0 | Low-quality    | Genome-fragment | NA | 2.42  | 0 |
| S1_vs_k141_37157          | [full]    | 2008 | No | NA | 0 | 0 | Not-determined | Genome-fragment | NA | 0     | 0 |
| S5_vs_k141_49100          | [full]    | 1526 | No | NA | 0 | 0 | Low-quality    | Genome-fragment | NA | 4.29  | 0 |
| S1_vs_k141_3779           | [full]    | 1075 | No | NA | 0 | 0 | Not-determined | Genome-fragment | NA | 0     | 0 |
| S16_extracted_117805      | [full]    | 1526 | No | NA | 1 | 0 | Low-quality    | Genome-fragment | NA | 1.82  | 0 |
| S16_vs_164904             | [full]    | 1526 | No | NA | 0 | 1 | Low-quality    | Genome-fragment | NA | 0.91  | 0 |
| S11_vs_k141_79492         | [full]    | 1527 | No | NA | 0 | 2 | Low-quality    | Genome-fragment | NA | 1.74  | 0 |
| S1_vs_k141_96292          | [full]    | 3963 | No | NA | 0 | 1 | Not-determined | Genome-fragment | NA | 0     | 0 |
| S1_vs_k141_144537         | [full]    | 2849 | No | NA | 0 | 1 | Not-determined | Genome-fragment | NA | 0     | 0 |
| S1_extracted_k141_44390   | [full]    | 1527 | No | NA | 1 | 0 | Low-quality    | Genome-fragment | NA | 3.81  | 0 |
| S1_vs_k141_18657          | [full]    | 1865 | No | NA | 4 | 1 | Not-determined | Genome-fragment | NA | 0     | 0 |
| S1_vs_k141_42994          | [full]    | 1527 | No | NA | 0 | 1 | Low-quality    | Genome-fragment | NA | 1.49  | 0 |
| S1_vs_k141_44917          | [full]    | 4719 | No | NA | 0 | 1 | Not-determined | Genome-fragment | NA | 0     | 0 |
| S16_extracted_28151       | [full]    | 1527 | No | NA | 1 | 1 | Low-quality    | Genome-fragment | NA | 0.73  | 0 |
| S12_vs_k141_157107        | [full]    | 1527 | No | NA | 0 | 1 | Low-quality    | Genome-fragment | NA | 3.07  | 0 |
| S6_extracted_k141_32499   | [full]    | 1527 | No | NA | 1 | 0 | Low-quality    | Genome-fragment | NA | 1.07  | 0 |
| S6_vs_k141_10755          | [full]    | 1527 | No | NA | 0 | 0 | Low-quality    | Genome-fragment | NA | 2.37  | 0 |
| S11_vs_k141_28276         | [full]    | 1528 | No | NA | 0 | 0 | Low-quality    | Genome-fragment | NA | 3.19  | 0 |
| S14_extracted_k141_115988 | [full]    | 1528 | No | NA | 0 | 0 | Low-quality    | Genome-fragment | NA | 3.17  | 0 |
| S1_vs_k141_58139          | [full]    | 3324 | No | NA | 0 | 1 | Not-determined | Genome-fragment | NA | 0     | 0 |
| S1_vs_k141_104651         | [full]    | 4773 | No | NA | 0 | 1 | Not-determined | Genome-fragment | NA | 0     | 0 |
| S14_vs_k141_81076         | [full]    | 1528 | No | NA | 0 | 0 | Low-quality    | Genome-fragment | NA | 3.21  | 0 |
| S1_vs_k141_118326         | [full]    | 1390 | No | NA | 0 | 1 | Not-determined | Genome-fragment | NA | 1.43  | 0 |
| S1_vs_k141_128880         | [112gene] | 1528 | No | NA | 2 | 0 | Low-quality    | Genome-fragment | NA | 0     | 0 |
| S1_vs_k141_138167         | [full]    | 2121 | No | NA | 0 | 1 | Not-determined | Genome-fragment | NA | 0     | 0 |
| S3_extracted_k141_9243    | [full]    | 1528 | No | NA | 0 | 0 | Low-quality    | Genome-fragment | NA | 0.85  | 0 |
| S1_vs_k141_116184         | [full]    | 5340 | No | NA | 0 | 1 | Not-determined | Genome-fragment | NA | 0     | 0 |
| S5_vs_k141_130024         | [full]    | 1528 | No | NA | 0 | 0 | Low-quality    | Genome-fragment | NA | 3.03  | 0 |
| S7_vs_75759               | [full]    | 1528 | No | NA | 0 | 0 | Low-quality    | Genome-fragment | NA | 4.14  | 0 |
| S1_vs_k141_11821          | [full]    | 3180 | No | NA | 0 | 3 | Not-determined | Genome-fragment | NA | 0     | 0 |
| S10_vs_67028              | [full]    | 1528 | No | NA | 0 | 0 | Low-quality    | Genome-fragment | NA | 3.34  | 0 |
| S10_vs_75993              | [full]    | 1528 | No | NA | 0 | 0 | Low-quality    | Genome-fragment | NA | 2.86  | 0 |
| S12_vs_k141_45635         | [full]    | 1528 | No | NA | 0 | 3 | Low-quality    | Genome-fragment | NA | 0.39  | 0 |
| S1_vs_k141_45026          | [full]    | 2038 | No | NA | 4 | 1 | Not-determined | Genome-fragment | NA | 0     | 0 |
| S1_vs_k141_31597          | [full]    | 3115 | No | NA | 0 | 3 | Not-determined | Genome-fragment | NA | 0     | 0 |
| S12_vs_k141_45875         | [full]    | 1528 | No | NA | 1 | 0 | Low-quality    | Genome-fragment | NA | 4.36  | 0 |
| S8_vs_k141_59497          | [full]    | 1528 | No | NA | 2 | 0 | Low-quality    | Genome-fragment | NA | 3.81  | 0 |
| S17_vs_k141_16695         | [full]    | 1529 | No | NA | 0 | 1 | Low-quality    | Genome-fragment | NA | 1.39  | 0 |
| S17_vs_k141_138410        | [full]    | 1529 | No | NA | 0 | 1 | Low-quality    | Genome-fragment | NA | 2.08  | 0 |
| S9_vs_k141_74839          | [full]    | 1529 | No | NA | 0 | 2 | Low-quality    | Genome-fragment | NA | 0.82  | 0 |
| S11_vs_k141_84168         | [full]    | 1529 | No | NA | 0 | 0 | Low-quality    | Genome-fragment | NA | 3.5   | 0 |
| S1_vs_k141_18824          | [full]    | 1178 | No | NA | 0 | 0 | Not-determined | Genome-fragment | NA | 0     | 0 |
| S3_extracted_k141_133602  | [full]    | 1529 | No | NA | 0 | 0 | Low-quality    | Genome-fragment | NA | 1.88  | 0 |
| S1_vs_k141_51663          | [full]    | 1023 | No | NA | 0 | 0 | Not-determined | Genome-fragment | NA | 0     | 0 |
| S3_vs_k141_119332         | [full]    | 1529 | No | NA | 0 | 1 | Low-quality    | Genome-fragment | NA | 1.02  | 0 |
| S7_extracted_41259        | [full]    | 1529 | No | NA | 0 | 0 | Low-quality    | Genome-fragment | NA | 2.73  | 0 |
| S1_vs_k141_144725         | [full]    | 4044 | No | NA | 0 | 0 | Not-determined | Genome-fragment | NA | 0     | 0 |
| S16_extracted_117676      | [full]    | 1529 | No | NA | 0 | 0 | Low-quality    | Genome-fragment | NA | 3.48  | 0 |
| S16_vs_25443              | [full]    | 1529 | No | NA | 0 | 0 | Low-quality    | Genome-fragment | NA | 3.33  | 0 |
| S16_vs_28840              | [full]    | 1529 | No | NA | 0 | 2 | Low-quality    | Genome-fragment | NA | 0.49  | 0 |
| S12_vs_k141_30989         | [full]    | 1529 | No | NA | 0 | 0 | Low-quality    | Genome-fragment | NA | 1.09  | 0 |
| S9_vs_k141_65410          | [full]    | 1530 | No | NA | 0 | 0 | Low-quality    | Genome-fragment | NA | 3.66  | 0 |
| S11_vs_k141_58568         | [full]    | 1530 | No | NA | 0 | 0 | Low-quality    | Genome-fragment | NA | 3.52  | 0 |
| S1_vs_k141_144791         | [full]    | 1052 | No | NA | 0 | 1 | Not-determined | Genome-fragment | NA | 0     | 0 |
| S14_vs_k141_89885         | [full]    | 1530 | No | NA | 0 | 1 | Low-quality    | Genome-fragment | NA | 2.5   | 0 |
| S14_vs_k141_41099         | [full]    | 1530 | No | NA | 0 | 1 | Low-quality    | Genome-fragment | NA | 1.79  | 0 |
| S1_vs_k141_11749          | [full]    | 2735 | No | NA | 0 | 0 | Not-determined | Genome-fragment | NA | 0     | 0 |
| S1_extracted_k141_113198  | [full]    | 1530 | No | NA | 0 | 0 | Low-quality    | Genome-fragment | NA | 0.86  | 0 |
| S1_vs_k141_4042           | [full]    | 2285 | No | NA | 0 | 2 | Not-determined | Genome-fragment | NA | 0     | 0 |
| S2_vs_k141_8659           | [full]    | 1530 | No | NA | 1 | 0 | Low-quality    | Genome-fragment | NA | 1.77  | 0 |
| S3_vs_k141_65206          | [full]    | 1530 | No | NA | 0 | 1 | Low-quality    | Genome-fragment | NA | 2.08  | 0 |
| S3_vs_k141_14503          | [full]    | 1530 | No | NA | 0 | 0 | Low-quality    | Genome-fragment | NA | 3.31  | 0 |
| S7_extracted_28377        | [full]    | 1530 | No | NA | 0 | 0 | Low-quality    | Genome-fragment | NA | 1.85  | 0 |
| S1_vs_k141_85180          | [full]    | 2740 | No | NA | 0 | 1 | Not-determined | Genome-fragment | NA | 0     | 0 |
| S7_extracted_52597        | [full]    | 1530 | No | NA | 0 | 1 | Low-quality    | Genome-fragment | NA | 4.16  | 0 |
| S16_extracted_117186      | [full]    | 1530 | No | NA | 0 | 0 | Low-quality    | Genome-fragment | NA | 2.63  | 0 |
| S10_vs_5097               | [full]    | 1530 | No | NA | 0 | 0 | Low-quality    | Genome-fragment | NA | 1.04  | 0 |
| S12_extracted_k14         |           |      |    |    |   |   |                |                 |    |       |   |



|                           |       |    |    |    |   |                |                 |       |   |
|---------------------------|-------|----|----|----|---|----------------|-----------------|-------|---|
| S1_vs_k141_56323  full    | 1533  | No | NA | 1  | 0 | Low-quality    | Genome-fragment | 3.52  | 0 |
| S12_extracted_k141_176886 | 1533  | No | NA | 0  | 0 | Low-quality    | Genome-fragment | 2.67  | 0 |
| S12_vs_k141_72065  full   | 1533  | No | NA | 1  | 0 | Low-quality    | Genome-fragment | 3.59  | 0 |
| S1_vs_k141_19378  full    | 4815  | No | NA | 0  | 2 | Not-determined | Genome-fragment | NA    | 0 |
| S12_vs_k141_67553  full   | 1533  | No | NA | 0  | 0 | Low-quality    | Genome-fragment | 2.26  | 0 |
| S17_vs_k141_50520  full   | 1534  | No | NA | 3  | 0 | Low-quality    | Genome-fragment | 2.61  | 0 |
| S9_extracted_k141_57432   | 1534  | No | NA | 0  | 0 | Low-quality    | Genome-fragment | 0.29  | 0 |
| S14_vs_k141_15072  full   | 1534  | No | NA | 1  | 0 | Low-quality    | Genome-fragment | 4.43  | 0 |
| S1_vs_k141_78976  full    | 1489  | No | NA | 0  | 0 | Not-determined | Genome-fragment | NA    | 0 |
| S1_vs_k141_94096  full    | 1534  | No | NA | 0  | 0 | Low-quality    | Genome-fragment | 3.63  | 0 |
| S1_vs_k141_138837  full   | 1534  | No | NA | 1  | 0 | Low-quality    | Genome-fragment | 3.93  | 0 |
| S1_vs_k141_85583  full    | 1832  | No | NA | 0  | 0 | Not-determined | Genome-fragment | NA    | 0 |
| S1_vs_k141_46122  full    | 1534  | No | NA | 2  | 0 | Low-quality    | Genome-fragment | 2.6   | 0 |
| S3_extracted_k141_56840   | 1534  | No | NA | 1  | 0 | Low-quality    | Genome-fragment | 1.71  | 0 |
| S5_vs_k141_89116  full    | 1534  | No | NA | 0  | 0 | Low-quality    | Genome-fragment | 46.34 | 0 |
| S7_extracted_5647         | 1534  | No | NA | 0  | 0 | Low-quality    | Genome-fragment | 2.51  | 0 |
| S7_vs_47010  full         | 1534  | No | NA | 0  | 0 | Low-quality    | Genome-fragment | 1.62  | 0 |
| S10_extracted_22518       | 1534  | No | NA | 0  | 0 | Low-quality    | Genome-fragment | 1     | 0 |
| S1_vs_k141_59062  full    | 1779  | No | NA | 0  | 2 | Not-determined | Genome-fragment | NA    | 0 |
| S1_vs_k141_79019  full    | 1478  | No | NA | 0  | 0 | Not-determined | Genome-fragment | NA    | 0 |
| S17_vs_k141_5749  full    | 1535  | No | NA | 0  | 0 | Low-quality    | Genome-fragment | 3.25  | 0 |
| S14_extracted_k141_37988  | 1535  | No | NA | 0  | 0 | Low-quality    | Genome-fragment | 2.78  | 0 |
| S14_extracted_k141_86830  | 1535  | No | NA | 5  | 0 | Low-quality    | Genome-fragment | 5.04  | 0 |
| S1_vs_k141_124331  full   | 1535  | No | NA | 0  | 0 | Low-quality    | Genome-fragment | 0.76  | 0 |
| S1_vs_k141_52546  full    | 4239  | No | NA | 0  | 1 | Not-determined | Genome-fragment | NA    | 0 |
| S3_vs_k141_71044  full    | 1535  | No | NA | 0  | 0 | Low-quality    | Genome-fragment | 1.74  | 0 |
| S1_vs_k141_85684  full    | 1254  | No | NA | 0  | 1 | Not-determined | Genome-fragment | NA    | 0 |
| S1_vs_k141_138796  full   | 1105  | No | NA | 0  | 1 | Not-determined | Genome-fragment | NA    | 0 |
| S1_vs_k141_119218  full   | 1367  | No | NA | 0  | 2 | Not-determined | Genome-fragment | NA    | 0 |
| S5_extracted_k141_74729   | 1535  | No | NA | 0  | 0 | Low-quality    | Genome-fragment | 4.35  | 0 |
| S5_vs_k141_49890  full    | 1535  | No | NA | 0  | 0 | Low-quality    | Genome-fragment | 3.73  | 0 |
| S7_vs_28647  full         | 1535  | No | NA | 0  | 0 | Low-quality    | Genome-fragment | 2.31  | 0 |
| S16_vs_58938  H2gene      | 1535  | No | NA | 1  | 0 | Low-quality    | Genome-fragment | 3.41  | 0 |
| S12_vs_k141_62509  full   | 1535  | No | NA | 1  | 0 | Low-quality    | Genome-fragment | 3.85  | 0 |
| S8_extracted_k141_131124  | 1535  | No | NA | 0  | 0 | Low-quality    | Genome-fragment | 0.81  | 0 |
| S17_extracted_k141_72880  | 1536  | No | NA | 0  | 0 | Low-quality    | Genome-fragment | 4.88  | 0 |
| S17_vs_k141_169490  full  | 1536  | No | NA | 0  | 1 | Low-quality    | Genome-fragment | 3.86  | 0 |
| S1_vs_k141_52600  full    | 1022  | No | NA | 0  | 0 | Not-determined | Genome-fragment | NA    | 0 |
| S1_vs_k141_99158  full    | 1563  | No | NA | 1  | 0 | Not-determined | Genome-fragment | NA    | 0 |
| S1_vs_k141_149979  full   | 1536  | No | NA | 1  | 0 | Low-quality    | Genome-fragment | 3.55  | 0 |
| S3_extracted_k141_4659    | 1536  | No | NA | 0  | 0 | Low-quality    | Genome-fragment | 0.75  | 0 |
| S1_vs_k141_25524  full    | 3461  | No | NA | 0  | 2 | Not-determined | Genome-fragment | NA    | 0 |
| S3_vs_k141_120548  full   | 1536  | No | NA | 0  | 1 | Low-quality    | Genome-fragment | 1.48  | 0 |
| S1_vs_k141_59175  full    | 2378  | No | NA | 0  | 2 | Not-determined | Genome-fragment | NA    | 0 |
| S5_extracted_k141_20966   | 1536  | No | NA | 0  | 0 | Low-quality    | Genome-fragment | 2.37  | 0 |
| S5_vs_k141_108913  H2gene | 1536  | No | NA | 0  | 0 | Low-quality    | Genome-fragment | 3.59  | 0 |
| S16_extracted_77914       | 1536  | No | NA | 0  | 0 | Low-quality    | Genome-fragment | 1.25  | 0 |
| S16_vs_57218  full        | 1536  | No | NA | 0  | 0 | Low-quality    | Genome-fragment | 4.12  | 0 |
| S10_extracted_1923        | 1536  | No | NA | 0  | 0 | Low-quality    | Genome-fragment | 2.74  | 0 |
| S15_vs_61073  full        | 1536  | No | NA | 0  | 0 | Low-quality    | Genome-fragment | 2.57  | 0 |
| S1_vs_k141_64468  full    | 3443  | No | NA | 0  | 1 | Not-determined | Genome-fragment | NA    | 0 |
| S1_vs_k141_52685  full    | 1683  | No | NA | 0  | 0 | Low-quality    | Genome-fragment | NA    | 0 |
| S9_vs_k141_11713  H2gene  | 1537  | No | NA | 1  | 0 | Low-quality    | Genome-fragment | 3.5   | 0 |
| S1_vs_k141_108320  H2gene | 1537  | No | NA | 2  | 0 | Low-quality    | Genome-fragment | 3.93  | 0 |
| S5_vs_k141_38736  full    | 1537  | No | NA | 1  | 0 | Low-quality    | Genome-fragment | 3.43  | 0 |
| S1_vs_k141_13670  full    | 1922  | No | NA | 0  | 0 | Not-determined | Genome-fragment | NA    | 0 |
| S1_vs_k141_92453  full    | 1197  | No | NA | 0  | 0 | Not-determined | Genome-fragment | NA    | 0 |
| S1_vs_k141_13675  full    | 1316  | No | NA | 0  | 0 | Not-determined | Genome-fragment | NA    | 0 |
| S1_vs_k141_92486  full    | 1323  | No | NA | 0  | 0 | Not-determined | Genome-fragment | NA    | 0 |
| S1_vs_k141_145456  full   | 1141  | No | NA | 0  | 1 | Not-determined | Genome-fragment | NA    | 0 |
| S8_extracted_k141_3736    | 1537  | No | NA | 2  | 0 | Low-quality    | Genome-fragment | 4.99  | 0 |
| S1_vs_k141_112467  full   | 1851  | No | NA | 0  | 2 | Not-determined | Genome-fragment | NA    | 0 |
| S7_vs_70016  full         | 1538  | No | NA | 2  | 0 | Low-quality    | Genome-fragment | 3.82  | 0 |
| S1_vs_k141_138973  full   | 1103  | No | NA | 0  | 1 | Not-determined | Genome-fragment | NA    | 0 |
| S16_vs_17468  full        | 1538  | No | NA | 0  | 0 | Low-quality    | Genome-fragment | 3.52  | 0 |
| S1_vs_k141_25680  full    | 1357  | No | NA | 0  | 0 | Not-determined | Genome-fragment | NA    | 0 |
| S1_vs_k141_105924  full   | 1341  | No | NA | 0  | 0 | Not-determined | Genome-fragment | NA    | 0 |
| S16_vs_57380  H2gene      | 1538  | No | NA | 1  | 0 | Low-quality    | Genome-fragment | 2.91  | 0 |
| S10_extracted_16682       | 1538  | No | NA | 0  | 2 | Low-quality    | Genome-fragment | 0.92  | 0 |
| S1_vs_k141_79353  full    | 1174  | No | NA | 0  | 2 | Not-determined | Genome-fragment | NA    | 0 |
| S1_vs_k141_149633  full   | 1300  | No | NA | 0  | 0 | Not-determined | Genome-fragment | NA    | 0 |
| S12_vs_k141_101427  full  | 1538  | No | NA | 0  | 0 | Low-quality    | Genome-fragment | 1.65  | 0 |
| S8_vs_k141_106344  full   | 1538  | No | NA | 0  | 0 | Low-quality    | Genome-fragment | 3.38  | 0 |
| S8_vs_k141_40239  H2gene  | 1538  | No | NA | 1  | 0 | Low-quality    | Genome-fragment | 0.13  | 0 |
| S1_vs_k141_112480  full   | 1024  | No | NA | 0  | 1 | Not-determined | Genome-fragment | NA    | 0 |
| S1_vs_k141_105944  full   | 1809  | No | NA | 0  | 1 | Not-determined | Genome-fragment | NA    | 0 |
| S1_vs_k141_145513  full   | 1550  | No | NA | 0  | 1 | Not-determined | Genome-fragment | NA    | 0 |
| S17_extracted_k141_24589  | 1539  | No | NA | 0  | 1 | Low-quality    | Genome-fragment | 4.34  | 0 |
| S1_vs_k141_4628  full     | 1761  | No | NA | 0  | 2 | Not-determined | Genome-fragment | NA    | 0 |
| S11_vs_k141_26850  full   | 1539  | No | NA | 1  | 0 | Low-quality    | Genome-fragment | 3.51  | 0 |
| S1_vs_k141_45960  full    | 2318  | No | NA | 0  | 1 | Not-determined | Genome-fragment | NA    | 0 |
| S1_vs_k141_85990  full    | 2402  | No | NA | 0  | 0 | Not-determined | Genome-fragment | NA    | 0 |
| S14_extracted_k141_63198  | 1539  | No | NA | 2  | 0 | Low-quality    | Genome-fragment | 2.68  | 0 |
| S5_vs_k141_52575  full    | 2594  | No | NA | 0  | 2 | Not-determined | Genome-fragment | NA    | 0 |
| S1_vs_k141_25748  full    | 2035  | No | NA | 0  | 2 | Not-determined | Genome-fragment | NA    | 0 |
| S5_vs_k141_87211  full    | 1539  | No | NA | 1  | 0 | Low-quality    | Genome-fragment | 4.23  | 0 |
| S5_vs_k141_42370  full    | 1539  | No | NA | 1  | 0 | Low-quality    | Genome-fragment | 2.75  | 0 |
| S1_vs_k141_22665  full    | 1817  | No | NA | 0  | 1 | Not-determined | Genome-fragment | NA    | 0 |
| S1_vs_k141_37979  full    | 2650  | No | NA | 0  | 0 | Not-determined | Genome-fragment | NA    | 0 |
| S1_vs_k141_86035  full    | 1142  | No | NA | 0  | 1 | Not-determined | Genome-fragment | NA    | 0 |
| S16_vs_56544  full        | 1539  | No | NA | 0  | 1 | Low-quality    | Genome-fragment | 3.08  | 0 |
| S16_vs_15891  H2gene      | 1539  | No | NA | 0  | 0 | Low-quality    | Genome-fragment | 4.11  | 0 |
| S8_extracted_k141_33047   | 1539  | No | NA | 0  | 1 | Low-quality    | Genome-fragment | 0.5   | 0 |
| S13_vs_13635  H2gene      | 1540  | No | NA | 1  | 0 | Low-quality    | Genome-fragment | 2.25  | 0 |
| S1_extracted_k141_108678  | 1540  | No | NA | 0  | 0 | Low-quality    | Genome-fragment | 1.15  | 0 |
| S1_vs_k141_120320  full   | 1540  | No | NA | 2  | 0 | Low-quality    | Genome-fragment | 4.5   | 0 |
| S3_extracted_k141_88809   | 1540  | No | NA | 1  | 0 | Low-quality    | Genome-fragment | 3.04  | 0 |
| S3_extracted_k141_61030   | 1540  | No | NA | 0  | 0 | Low-quality    | Genome-fragment | 2.75  | 0 |
| S3_vs_k141_51814  full    | 1540  | No | NA | 0  | 0 | Low-quality    | Genome-fragment | 2.44  | 0 |
| S5_extracted_k141_27617   | 1540  | No | NA | 0  | 1 | Low-quality    | Genome-fragment | 0.75  | 0 |
| S7_vs_81502  full         | 1540  | No | NA | 1  | 0 | Low-quality    | Genome-fragment | 3.52  | 0 |
| S7_vs_43903  H2gene       | 1540  | No | NA | 0  | 0 | Low-quality    | Genome-fragment | 3.35  | 0 |
| S1_vs_k141_71393  full    | 1116  | No | NA | 0  | 1 | Not-determined | Genome-fragment | NA    | 0 |
| S16_extracted_128427      | 1540  | No | NA | 2  | 0 | Low-quality    | Genome-fragment | 3.48  | 0 |
| S1_vs_k141_12922  full    | 1088  | No | NA | 0  | 1 | Not-determined | Genome-fragment | NA    | 0 |
| S16_extracted_160888      | 1540  | No | NA | 3  | 0 | Low-quality    | Genome-fragment | 4.07  | 0 |
| S10_vs_4519  full         | 1540  | No | NA | 1  | 0 | Low-quality    | Genome-fragment | 0.55  | 0 |
| S8_vs_k141_178128  H2gene | 1540  | No | NA | 1  | 0 | Low-quality    | Genome-fragment | 3.37  | 0 |
| S1_vs_k141_12764  full    | 6028  | No | NA | 1  | 1 | Not-determined | Genome-fragment | NA    | 0 |
| S11_vs_k141_35189  full   | 1541  | No | NA | 0  | 2 | Low-quality    | Genome-fragment | 3.02  | 0 |
| S13_vs_56024  full        | 1541  | No | NA | 0  | 0 | Low-quality    | Genome-fragment | 2.69  | 0 |
| S14_vs_k141_50639  full   | 1541  | No | NA | 0  | 0 | Low-quality    | Genome-fragment | 3.84  | 0 |
| S1_extracted_k141_30753   | 1541  | No | NA | 2  | 0 | Low-quality    | Genome-fragment | 3.92  | 0 |
| S1_vs_k141_71409  full    | 2070  | No | NA | 0  | 2 | Not-determined | Genome-fragment | NA    | 0 |
| S1_vs_k141_106122  full   | 1883  | No | NA | 0  | 0 | Not-determined | Genome-fragment | NA    | 0 |
| S1_extracted_k141_125607  | 1541  | No | NA | 0  | 1 | Low-quality    | Genome-fragment | 2.63  | 0 |
| S7_vs_67765  full         | 1541  | No | NA | 0  | 3 | Low-quality    | Genome-fragment | 2.47  | 0 |
| S1_vs_k141_13070  full    | 1164  | No | NA | 0  | 0 | Not-determined | Genome-fragment | NA    | 0 |
| S7_vs_88588  H2gene       | 1541  | No | NA | 0  | 0 | Low-quality    | Genome-fragment | 3.77  | 0 |
| S1_vs_k141_132924  full   | 2446  | No | NA | 0  | 1 | Not-determined | Genome-fragment | NA    | 0 |
| S16_vs_17279  full        | 1541  | No | NA | 0  | 1 | Low-quality    | Genome-fragment | 2.86  | 0 |
| S10_extracted_24007       | 1541  | No | NA | 0  | 1 | Low-quality    | Genome-fragment | 3.44  | 0 |
| S1_vs_k141_256821  full   | 2010  | No | NA | 0  | 1 | Not-determined | Genome-fragment | NA    | 0 |
| S10_vs_39459  full        | 1541  | No | NA | 2  | 0 | Low-quality    | Genome-fragment | 3.54  | 0 |
| S1_vs_k141_79577  full    | 22821 | No | NA | 13 | 0 | Not-determined | Genome-fragment | NA    | 0 |
| S12_vs_k141_179592  full  | 1541  | No | NA | 0  | 0 | Low-quality    | Genome-fragment | 2.8   | 0 |
| S8_extracted_k141_139122  | 1541  | No | NA | 0  | 0 | Low-quality    | Genome-fragment | 2.45  | 0 |
| S8_vs_k141_110253  full   | 1541  | No | NA | 0  | 0 | Low-quality    | Genome-fragment | 3.72  | 0 |
| S9_vs_k141_64095  full    | 1542  | No | NA | 0  | 0 | Low-quality    | Genome-fragment | 2.38  | 0 |
| S13_extracted_49964       | 1542  | No | NA | 0  | 0 | Low-quality    | Genome-fragment | 0.26  | 0 |
| S14_extracted_k141_48649  | 1542  | No | NA | 0  | 1 | Low-quality    | Genome-fragment | 0.16  | 0 |
| S1_vs_k141_48301  full    | 1623  | No | NA | 0  | 0 | Not-determined | Genome-fragment | NA    | 0 |
| S14_vs_k141_116655  full  | 1542  | No | NA | 0  | 0 | Low-quality    | Genome-fragment | 1.16  | 0 |
| S1_vs_k141_48361  full    | 1662  | No | NA | 0  | 2 | Not-determined | Genome-fragment | NA    | 0 |
| S14_vs_k141_56680  H2gene | 1542  | No | NA | 1  | 0 | Low-quality    | Genome-fragment | 3.47  | 0 |
| S1_vs_k141_79655  full    | 1190  | No | NA | 0  | 1 | Not-determined | Genome-fragment | NA    | 0 |
| S1_vs_k141_46993  full    | 1542  | No | NA | 0  | 1 | Low-quality    | Genome-fragment | 0.7   | 0 |
| S3_vs_k141_76276  full    | 1542  | No | NA | 0  | 0 | Low-quality    | Genome-fragment | 0.97  | 0 |
| S7_vs_79139  full         | 1542  | No | NA | 1  | 0 | Low-quality    | Genome-fragment | 4.11  | 0 |
| S16_extracted_148119      | 1542  | No | NA | 0  | 0 | Low-quality    | Genome-fragment | 2.62  | 0 |
| S1_vs_k141_112814  full   | 1506  | No | NA | 0  | 2 | Not-determined | Genome-fragment | NA    | 0 |
| S1_vs_k141_139386  full   | 1262  | No | NA | 0  | 2 | Not-determined | Genome-fragment | NA    | 0 |
| S16_vs_22254  full        | 1542  | No | NA | 0  | 0 | Low-quality    | Genome-fragment | 2.62  | 0 |
| S16_vs_36268  full        | 1542  | No | NA | 0  | 0 | Low-quality    | Genome-fragment | 2.91  | 0 |



|                          |      |     |     |   |   |                |                    |       |       |
|--------------------------|------|-----|-----|---|---|----------------|--------------------|-------|-------|
| S6_extracted_k141_47425  | 1543 | No  | NA  | 0 | 0 | Low-quality    | Genome-fragment    | 1.9   | 0     |
| S14_vs_k141_1103341 full | 1544 | No  | NA  | 0 | 0 | Low-quality    | Genome-fragment    | 3.7   | 0     |
| S3_vs_k141_3670 full     | 1544 | No  | NA  | 2 | 0 | Low-quality    | Genome-fragment    | 2.83  | 0     |
| S1_vs_k141_126196 full   | 1494 | No  | NA  | 0 | 0 | Not-determined | Genome-fragment NA | 0     | 0     |
| S3_vs_k141_20573 full    | 1544 | No  | NA  | 1 | 0 | Low-quality    | Genome-fragment    | 2.84  | 0     |
| S7_extracted_2903        | 1544 | No  | NA  | 0 | 0 | Low-quality    | Genome-fragment    | 1.01  | 0     |
| S7_vs_37851 full         | 1544 | No  | NA  | 1 | 0 | Low-quality    | Genome-fragment    | 3.89  | 0     |
| S16_vs_123991 full       | 1544 | No  | NA  | 1 | 0 | Low-quality    | Genome-fragment    | 1.41  | 0     |
| S16_vs_162490 in2gene    | 1544 | No  | NA  | 0 | 0 | Low-quality    | Genome-fragment    | 1.04  | 0     |
| S1_vs_k141_93112 full    | 2198 | No  | NA  | 0 | 1 | Not-determined | Genome-fragment NA | 0     | 0     |
| S10_extracted_93122      | 1544 | No  | NA  | 0 | 1 | Low-quality    | Genome-fragment    | 1.22  | 0     |
| S4_extracted_28145       | 1544 | No  | NA  | 0 | 0 | Low-quality    | Genome-fragment    | 5.09  | 0     |
| S1_vs_k141_65158 full    | 1467 | No  | NA  | 0 | 1 | Not-determined | Genome-fragment NA | 0     | 0     |
| S1_vs_k141_26298 full    | 4596 | No  | NA  | 0 | 4 | Not-determined | Genome-fragment NA | 0     | 0     |
| S6_extracted_k141_51871  | 1544 | No  | NA  | 1 | 0 | Low-quality    | Genome-fragment    | 2.57  | 0     |
| S1_vs_k141_119810 full   | 3511 | No  | NA  | 0 | 2 | Not-determined | Genome-fragment NA | 0     | 0     |
| S8_vs_k141_176074 full   | 1544 | No  | NA  | 1 | 0 | Low-quality    | Genome-fragment    | 2.56  | 0     |
| S17_extracted_k141_58229 | 1545 | No  | NA  | 0 | 1 | Low-quality    | Genome-fragment    | 0.78  | 0     |
| S1_vs_k141_5102 full     | 4762 | No  | NA  | 0 | 2 | Not-determined | Genome-fragment NA | 0     | 0     |
| S1_vs_k141_38430 full    | 1953 | No  | NA  | 0 | 1 | Not-determined | Genome-fragment NA | 0     | 0     |
| S1_vs_k141_106573 full   | 1506 | No  | NA  | 0 | 2 | Not-determined | Genome-fragment NA | 0     | 0     |
| S17_vs_k141_59956 full   | 1545 | No  | NA  | 0 | 0 | Low-quality    | Genome-fragment    | 2.93  | 0     |
| S9_vs_k141_6639 full     | 1545 | No  | NA  | 0 | 0 | Low-quality    | Genome-fragment    | 3.51  | 0     |
| S13_vs_130962 full       | 1545 | No  | NA  | 0 | 0 | Low-quality    | Genome-fragment    | 1.57  | 0     |
| S1_vs_k141_21244 full    | 1545 | No  | NA  | 0 | 0 | Low-quality    | Genome-fragment    | 0.88  | 0     |
| S1_vs_k141_113156 full   | 1419 | No  | NA  | 0 | 2 | Not-determined | Genome-fragment NA | 0     | 0     |
| S3_vs_k141_53027 full    | 1545 | No  | NA  | 0 | 0 | Low-quality    | Genome-fragment    | 3.13  | 0     |
| S1_vs_k141_59804 full    | 1406 | No  | NA  | 0 | 0 | Not-determined | Genome-fragment NA | 0     | 0     |
| S1_vs_k141_100019 full   | 4858 | No  | NA  | 0 | 0 | Medium-quality | Genome-fragment    | 87.87 | 0     |
| S5_vs_k141_116379 full   | 1545 | No  | NA  | 0 | 1 | Low-quality    | Genome-fragment    | 2.24  | 0     |
| S7_vs_25200 full         | 1545 | No  | NA  | 1 | 0 | Low-quality    | Genome-fragment    | 3.32  | 0     |
| S10_extracted_114349     | 1545 | No  | NA  | 2 | 0 | Low-quality    | Genome-fragment    | 0.92  | 0     |
| S10_vs_93910 full        | 1545 | No  | NA  | 0 | 0 | Low-quality    | Genome-fragment    | 2.81  | 0     |
| S1_vs_k141_38485 full    | 2010 | No  | NA  | 0 | 2 | Not-determined | Genome-fragment NA | 0     | 0     |
| S1_vs_k141_213422 full   | 3144 | No  | NA  | 0 | 2 | Not-determined | Genome-fragment NA | 0     | 0     |
| S12_vs_k141_68486 full   | 1545 | No  | NA  | 0 | 1 | Low-quality    | Genome-fragment    | 2.55  | 0     |
| S1_vs_k141_26418 full    | 2092 | No  | NA  | 0 | 2 | Not-determined | Genome-fragment NA | 0     | 0     |
| S1_vs_k141_26419 full    | 1746 | No  | NA  | 0 | 1 | Not-determined | Genome-fragment NA | 0     | 0     |
| S8_vs_k141_157573 full   | 1545 | No  | NA  | 0 | 0 | Low-quality    | Genome-fragment    | 5.55  | 0     |
| S1_vs_k141_146096 full   | 5232 | No  | NA  | 0 | 3 | Not-determined | Genome-fragment NA | 0     | 0     |
| S9_vs_k141_55777 full    | 1546 | No  | NA  | 0 | 0 | Low-quality    | Genome-fragment    | 1.3   | 0     |
| S11_vs_k141_61940 full   | 1546 | No  | NA  | 0 | 0 | Low-quality    | Genome-fragment    | 2.96  | 0     |
| S14_extracted_k141_10246 | 1546 | No  | NA  | 2 | 0 | Low-quality    | Genome-fragment    | 4.99  | 0     |
| S1_vs_k141_46676 full    | 3157 | No  | NA  | 0 | 3 | Not-determined | Genome-fragment NA | 0     | 0     |
| S14_vs_k141_75292 full   | 1546 | No  | NA  | 1 | 0 | Low-quality    | Genome-fragment    | 2.61  | 0     |
| S1_vs_k141_71787 full    | 1012 | No  | NA  | 1 | 1 | Not-determined | Genome-fragment NA | 0     | 0     |
| S1_vs_k141_86729 full    | 1699 | No  | NA  | 0 | 1 | Not-determined | Genome-fragment NA | 0     | 0     |
| S1_vs_k141_119949 full   | 1454 | No  | NA  | 0 | 0 | Not-determined | Genome-fragment NA | 0     | 0     |
| S1_vs_k141_124046 full   | 1546 | No  | NA  | 0 | 0 | Low-quality    | Genome-fragment    | 1.08  | 0     |
| S1_vs_k141_71799 full    | 1179 | No  | NA  | 0 | 2 | Not-determined | Genome-fragment NA | 0     | 0     |
| S7_vs_45494 full         | 1546 | No  | NA  | 0 | 0 | Low-quality    | Genome-fragment    | 2.53  | 0     |
| S16_extracted_24182      | 1546 | No  | NA  | 0 | 0 | Low-quality    | Genome-fragment    | 3.4   | 0     |
| S16_vs_119381 full       | 1546 | No  | NA  | 1 | 0 | Low-quality    | Genome-fragment    | 3.95  | 0     |
| S1_vs_k141_65361 full    | 1936 | No  | NA  | 0 | 2 | Not-determined | Genome-fragment NA | 0     | 0     |
| S1_vs_k141_46716 full    | 2368 | No  | NA  | 0 | 0 | Not-determined | Genome-fragment NA | 0     | 0     |
| S1_vs_k141_118974 full   | 4871 | No  | NA  | 0 | 4 | Not-determined | Genome-fragment NA | 0     | 0     |
| S10_vs_69242 full        | 1546 | No  | NA  | 2 | 0 | Low-quality    | Genome-fragment    | 8.61  | 0     |
| S1_vs_k141_26451 full    | 1262 | No  | NA  | 0 | 1 | Not-determined | Genome-fragment NA | 0     | 0     |
| S12_vs_k141_104093 full  | 1546 | No  | NA  | 0 | 1 | Low-quality    | Genome-fragment    | 1.12  | 0     |
| S17_vs_k141_149240 full  | 1547 | No  | NA  | 1 | 0 | Low-quality    | Genome-fragment    | 3.45  | 0     |
| S1_vs_k141_80609 full    | 1547 | Yes | 808 | 2 | 1 | Low-quality    | Genome-fragment    | 1.44  | 47.77 |
| S10_vs_111457 full       | 1547 | No  | NA  | 0 | 0 | Low-quality    | Genome-fragment    | 1.14  | 0     |
| S1_vs_k141_26586 full    | 2738 | No  | NA  | 0 | 2 | Not-determined | Genome-fragment NA | 0     | 0     |
| S1_vs_k141_146354 full   | 1824 | No  | NA  | 0 | 1 | Not-determined | Genome-fragment NA | 0     | 0     |
| S17_extracted_k141_49419 | 1548 | No  | NA  | 0 | 0 | Low-quality    | Genome-fragment    | 2.32  | 0     |
| S1_vs_k141_26638 full    | 1688 | No  | NA  | 0 | 2 | Not-determined | Genome-fragment NA | 0     | 0     |
| S1_vs_k141_5432 full     | 3162 | No  | NA  | 0 | 2 | Not-determined | Genome-fragment NA | 0     | 0     |
| S1_vs_k141_144444 full   | 2065 | No  | NA  | 0 | 2 | Not-determined | Genome-fragment NA | 0     | 0     |
| S17_vs_k141_13423 full   | 1548 | No  | NA  | 0 | 0 | Low-quality    | Genome-fragment    | 3.54  | 0     |
| S11_vs_k141_24880 full   | 1548 | No  | NA  | 1 | 0 | Low-quality    | Genome-fragment    | 2.61  | 0     |
| S14_vs_k141_26346 full   | 1548 | No  | NA  | 0 | 1 | Low-quality    | Genome-fragment    | 0.96  | 0     |
| S1_vs_k141_140167 full   | 1762 | No  | NA  | 0 | 0 | Not-determined | Genome-fragment NA | 0     | 0     |
| S1_vs_k141_5524 full     | 1537 | No  | NA  | 0 | 2 | Not-determined | Genome-fragment NA | 0     | 0     |
| S1_vs_k141_38795 full    | 2663 | No  | NA  | 0 | 0 | Not-determined | Genome-fragment NA | 0     | 0     |
| S1_vs_k141_47963 in2gene | 1548 | No  | NA  | 1 | 0 | Low-quality    | Genome-fragment    | 3.64  | 1     |
| S5_vs_k141_115747 full   | 1548 | No  | NA  | 1 | 0 | Low-quality    | Genome-fragment    | 3.34  | 0     |
| S7_extracted_25249       | 1548 | No  | NA  | 0 | 0 | Low-quality    | Genome-fragment    | 3.43  | 0     |
| S16_vs_12227 in2gene     | 1548 | No  | NA  | 1 | 0 | Low-quality    | Genome-fragment    | 2.53  | 0     |
| S1_vs_k141_126755 full   | 4255 | No  | NA  | 3 | 0 | Not-determined | Genome-fragment NA | 0     | 0     |
| S10_extracted_57712      | 1548 | No  | NA  | 0 | 1 | Low-quality    | Genome-fragment    | 1     | 0     |
| S1_vs_k141_146644 full   | 2762 | No  | NA  | 0 | 0 | Not-determined | Genome-fragment NA | 0     | 0     |
| S12_vs_k141_156872 full  | 1548 | No  | NA  | 0 | 0 | Low-quality    | Genome-fragment    | 3.91  | 0     |
| S17_extracted_k141_14811 | 1549 | No  | NA  | 4 | 0 | Low-quality    | Genome-fragment    | 4.04  | 0     |
| S1_vs_k141_68999 full    | 2770 | No  | NA  | 0 | 0 | Not-determined | Genome-fragment NA | 0     | 0     |
| S1_vs_k141_5646 full     | 2684 | No  | NA  | 0 | 2 | Not-determined | Genome-fragment NA | 0     | 0     |
| S1_extracted_k141_125670 | 1549 | No  | NA  | 1 | 0 | Low-quality    | Genome-fragment    | 4.12  | 0     |
| S1_vs_k141_145528 full   | 1549 | No  | NA  | 0 | 0 | Low-quality    | Genome-fragment    | 3.65  | 0     |
| S2_vs_k141_51390 full    | 1549 | No  | NA  | 0 | 0 | Low-quality    | Genome-fragment    | 2.98  | 0     |
| S1_vs_k141_146754 full   | 3654 | No  | NA  | 0 | 1 | Not-determined | Genome-fragment NA | 0     | 0     |
| S1_vs_k141_157283 full   | 1341 | No  | NA  | 0 | 0 | Not-determined | Genome-fragment NA | 0     | 0     |
| S1_vs_k141_65984 full    | 2765 | No  | NA  | 0 | 1 | Not-determined | Genome-fragment NA | 0     | 0     |
| S5_extracted_k141_80854  | 1549 | No  | NA  | 0 | 0 | Low-quality    | Genome-fragment    | 2.35  | 0     |
| S1_vs_k141_66089 full    | 1532 | No  | NA  | 0 | 1 | Not-determined | Genome-fragment NA | 0     | 0     |
| S1_vs_k141_66182 full    | 1301 | No  | NA  | 0 | 2 | Not-determined | Genome-fragment NA | 0     | 0     |
| S1_vs_k141_39095 full    | 2212 | No  | NA  | 0 | 0 | Low-quality    | Genome-fragment    | 2.21  | 0     |
| S5_extracted_k141_124458 | 1549 | No  | NA  | 2 | 0 | Low-quality    | Genome-fragment    | 4.1   | 0     |
| S5_vs_k141_123206 full   | 1549 | No  | NA  | 0 | 0 | Low-quality    | Genome-fragment    | 3.5   | 0     |
| S2_vs_k141_88318 full    | 1549 | No  | NA  | 1 | 0 | Low-quality    | Genome-fragment    | 3.82  | 0     |
| S1_vs_k141_66340 full    | 1146 | No  | NA  | 0 | 1 | Not-determined | Genome-fragment NA | 0     | 0     |
| S1_vs_k141_39244 full    | 4216 | No  | NA  | 0 | 3 | Not-determined | Genome-fragment NA | 0     | 0     |
| S7_vs_94006 full         | 1549 | No  | NA  | 0 | 0 | Low-quality    | Genome-fragment    | 3.52  | 0     |
| S16_vs_150477 full       | 1549 | No  | NA  | 0 | 0 | Low-quality    | Genome-fragment    | 3.75  | 0     |
| S1_vs_k141_6033 full     | 1672 | No  | NA  | 0 | 0 | Not-determined | Genome-fragment NA | 0     | 0     |
| S1_vs_k141_6037 full     | 2076 | No  | NA  | 0 | 1 | Not-determined | Genome-fragment NA | 0     | 0     |
| S1_vs_k141_157548 full   | 2228 | No  | NA  | 0 | 1 | Not-determined | Genome-fragment NA | 0     | 0     |
| S16_vs_97459 full        | 1549 | No  | NA  | 0 | 1 | Low-quality    | Genome-fragment    | 2.23  | 0     |
| S12_vs_k141_54209 full   | 1549 | No  | NA  | 1 | 0 | Low-quality    | Genome-fragment    | 3.63  | 0     |
| S15_vs_562521 full       | 1549 | No  | NA  | 0 | 1 | Low-quality    | Genome-fragment    | 2.46  | 0     |
| S8_extracted_k141_4173   | 1549 | No  | NA  | 0 | 0 | Low-quality    | Genome-fragment    | 2.46  | 0     |
| S1_vs_k141_6259 full     | 1530 | No  | NA  | 0 | 1 | Not-determined | Genome-fragment NA | 0     | 0     |
| S1_vs_k141_66865 full    | 1521 | No  | NA  | 0 | 0 | Not-determined | Genome-fragment NA | 0     | 0     |
| S1_vs_k141_72656 full    | 2848 | No  | NA  | 0 | 1 | Not-determined | Genome-fragment NA | 0     | 0     |
| S1_vs_k141_150530 full   | 1397 | No  | NA  | 0 | 2 | Not-determined | Genome-fragment NA | 0     | 0     |
| S8_vs_k141_74161 full    | 1549 | No  | NA  | 0 | 0 | Low-quality    | Genome-fragment    | 2.46  | 0     |
| S1_vs_k141_6281 full     | 1211 | No  | NA  | 0 | 1 | Not-determined | Genome-fragment NA | 0     | 0     |
| S17_vs_k141_97588 full   | 1550 | No  | NA  | 0 | 0 | Low-quality    | Genome-fragment    | 2.59  | 0     |
| S1_vs_k141_72762 full    | 1998 | No  | NA  | 0 | 1 | Not-determined | Genome-fragment NA | 0     | 0     |
| S17_vs_k141_147618 full  | 1550 | No  | NA  | 0 | 0 | Low-quality    | Genome-fragment    | 0.91  | 0     |
| S1_extracted_k141_303614 | 1550 | No  | NA  | 0 | 2 | Low-quality    | Genome-fragment    | 0.17  | 0     |
| S1_vs_k141_157764 full   | 5060 | No  | NA  | 0 | 2 | Not-determined | Genome-fragment NA | 0     | 0     |
| S16_vs_29977 full        | 1550 | No  | NA  | 0 | 0 | Low-quality    | Genome-fragment    | 1.81  | 0     |
| S16_vs_158571 full       | 1550 | No  | NA  | 0 | 0 | Low-quality    | Genome-fragment    | 3.74  | 0     |
| S1_vs_k141_39730 full    | 1048 | No  | NA  | 0 | 2 | Not-determined | Genome-fragment NA | 0     | 0     |
| S2_vs_k141_17411 full    | 1550 | No  | NA  | 1 | 0 | Low-quality    | Genome-fragment    | 3.14  | 0     |
| S1_vs_k141_39809 full    | 2467 | No  | NA  | 0 | 2 | Not-determined | Genome-fragment NA | 0     | 0     |
| S6_vs_k141_15257 full    | 1550 | No  | NA  | 0 | 0 | Low-quality    | Genome-fragment    | 0.91  | 0     |
| S1_vs_k141_115119 full   | 1551 | No  | NA  | 0 | 0 | Low-quality    | Genome-fragment    | 1.13  | 0     |
| S1_vs_k141_39913 full    | 1406 | No  | NA  | 0 | 0 | Not-determined | Genome-fragment NA | 0     | 0     |
| S3_vs_k141_16384 full    | 1551 | No  | NA  | 0 | 0 | Low-quality    | Genome-fragment    | 2.72  | 0     |
| S1_vs_k141_150865 full   | 2223 | No  | NA  | 0 | 2 | Not-determined | Genome-fragment NA | 0     | 0     |
| S1_vs_k141_158190 full   | 1002 | No  | NA  | 0 | 1 | Not-determined | Genome-fragment NA | 0     | 0     |
| S7_vs_72977 full         | 1551 | No  | NA  | 0 | 0 | Low-quality    | Genome-fragment    | 3.86  | 0     |
| S1_vs_k141_150919 full   | 1655 | No  | NA  | 0 | 1 | Not-determined | Genome-fragment NA | 0     | 0     |
| S1_vs_k141_158362 full   | 1251 | No  | NA  | 0 | 0 | Not-determined | Genome-fragment NA | 0     | 0     |
| S7_vs_750841 full        | 1551 | No  | NA  | 0 | 0 | Low-quality    | Genome-fragment    | 3.62  | 0     |
| S15_vs_45237 in2gene     | 1551 | No  | NA  | 1 | 0 | Low-quality    | Genome-fragment    | 3.48  | 0     |
| S1_vs_k141_158492 full   | 7107 | No  | NA  | 0 | 5 | Not-determined | Genome-fragment NA | 0     | 0     |
| S1_vs_k141_158493 full   | 1129 | No  | NA  | 0 | 1 | Not-determined | Genome-fragment NA | 0     | 0     |
| S4_extracted_4997        | 1551 | No  | NA  | 2 | 0 | Low-quality    | Genome-fragment    | 5.1   | 0     |
| S4_extracted_13380       | 1551 | No  | NA  | 0 | 0 | Low-quality    | Genome-fragment    | 2.12  | 0     |
| S6_vs_k141_7352 full     | 1551 | No  | NA  | 1 | 0 | Low-quality    | Genome-fragment    | 2.99  | 0     |
| S1_vs_k141_1514031 full  | 5241 | No  | NA  | 0 | 1 | Not-determined | Genome-fragment NA | 0     | 0     |
| S6_vs_k141_114851 full   | 1551 | No  | NA  | 0 | 2 | Low-quality    | Genome-fragment    | 3.28  | 0     |
| S8_extracted_k141_152231 | 1551 | No  | NA  | 0 | 1 | Low-quality    | Genome-fragment    | 0.84  | 0     |
| S1_vs_k141_151602 full   | 1708 | No  | NA  | 0 | 0 | Not-determined | Genome-fragment NA | 0     | 0     |
|                          |      |     |     |   |   |                |                    |       |       |



|                            |       |     |     |    |   |                |                 |       |       |
|----------------------------|-------|-----|-----|----|---|----------------|-----------------|-------|-------|
| S14_vs_k141_22370  full    | 1553  | No  | NA  | 0  | 0 | Low-quality    | Genome-fragment | 3.85  | 0     |
| S1_vs_k141_73975   H2gene  | NA    | NA  | NA  | 1  | 0 | Not-determined | Genome-fragment | NA    | 0     |
| S14_vs_k141_30059  full    | 1553  | No  | NA  | 0  | 2 | Low-quality    | Genome-fragment | 1.12  | 0     |
| S1_vs_k141_153906   H2gene | 2950  | No  | NA  | 0  | 1 | Not-determined | Genome-fragment | NA    | 0     |
| S14_vs_k141_73802  full    | 1553  | No  | NA  | 0  | 0 | Low-quality    | Genome-fragment | 3.6   | 0     |
| S3_extracted_k141_144602   | 1553  | No  | NA  | 1  | 0 | Low-quality    | Genome-fragment | 3.4   | 0     |
| S3_vs_k141_22812  full     | 1553  | No  | NA  | 1  | 0 | Low-quality    | Genome-fragment | 2.42  | 0     |
| S7_extracted_29742         | 1553  | No  | NA  | 0  | 2 | Low-quality    | Genome-fragment | 2.88  | 0     |
| S7_extracted_60692         | 1553  | No  | NA  | 0  | 0 | Low-quality    | Genome-fragment | 2.93  | 0     |
| S7_vs_125711  full         | 1553  | No  | NA  | 3  | 0 | Low-quality    | Genome-fragment | 3.33  | 0     |
| S16_vs_156471  full        | 1553  | No  | NA  | 0  | 2 | Low-quality    | Genome-fragment | 0.76  | 0     |
| S10_vs_67733   H2gene      | 1553  | No  | NA  | 1  | 0 | Low-quality    | Genome-fragment | 0.84  | 0     |
| S12_extracted_k141_146725  | 1553  | No  | NA  | 0  | 0 | Low-quality    | Genome-fragment | 4.13  | 0     |
| S9_vs_k141_46896  full     | 1554  | No  | NA  | 2  | 0 | Low-quality    | Genome-fragment | 4.63  | 0     |
| S3_vs_k141_75706  full     | 1554  | No  | NA  | 1  | 0 | Low-quality    | Genome-fragment | 2.73  | 0     |
| S3_vs_k141_516389   H2gene | 1554  | No  | NA  | 1  | 0 | Low-quality    | Genome-fragment | 1.49  | 0     |
| S1_vs_k141_48439   H2gene  | 1236  | No  | NA  | 0  | 0 | Not-determined | Genome-fragment | NA    | 0     |
| S16_vs_136042   H2gene     | 1554  | No  | NA  | 1  | 0 | Low-quality    | Genome-fragment | 4.09  | 0     |
| S12_vs_k141_462346  full   | 1554  | No  | NA  | 2  | 0 | Low-quality    | Genome-fragment | 2.96  | 0     |
| S13_vs_20158  full         | 1555  | No  | NA  | 0  | 0 | Low-quality    | Genome-fragment | 2.25  | 0     |
| S7_vs_51535  full          | 1555  | No  | NA  | 0  | 1 | Low-quality    | Genome-fragment | 1.97  | 0     |
| S16_vs_120975  full        | 1555  | No  | NA  | 2  | 0 | Low-quality    | Genome-fragment | 2.38  | 0     |
| S1_vs_k141_61444   H2gene  | 1996  | No  | NA  | 0  | 1 | Not-determined | Genome-fragment | NA    | 0     |
| S17_vs_k141_146824  full   | 1556  | No  | NA  | 0  | 1 | Low-quality    | Genome-fragment | 3.19  | 0     |
| S13_vs_24549  full         | 1556  | No  | NA  | 0  | 2 | Low-quality    | Genome-fragment | 1.41  | 0     |
| S1_vs_k141_115502   H2gene | 1053  | No  | NA  | 0  | 0 | Not-determined | Genome-fragment | NA    | 0     |
| S13_vs_113751   H2gene     | 1556  | No  | NA  | 1  | 0 | Low-quality    | Genome-fragment | 2.95  | 0     |
| S1_extracted_k141_109462   | 1556  | No  | NA  | 1  | 0 | Low-quality    | Genome-fragment | 2.53  | 0     |
| S1_extracted_k141_65477    | 1556  | No  | NA  | 0  | 0 | Low-quality    | Genome-fragment | 1.57  | 0     |
| S5_vs_k141_25057  full     | 1556  | No  | NA  | 0  | 1 | Low-quality    | Genome-fragment | 0.49  | 0     |
| S5_vs_k141_5827  full      | 1556  | No  | NA  | 0  | 1 | Low-quality    | Genome-fragment | 1     | 0     |
| S16_vs_25689  full         | 1556  | No  | NA  | 0  | 0 | Low-quality    | Genome-fragment | 1.96  | 0     |
| S16_vs_136724  full        | 1556  | No  | NA  | 0  | 0 | Low-quality    | Genome-fragment | 2.6   | 0     |
| S12_extracted_k141_54184   | 1556  | No  | NA  | 2  | 0 | Low-quality    | Genome-fragment | 3.49  | 0     |
| S1_vs_k141_5588   H2gene   | 2453  | No  | NA  | 0  | 0 | Not-determined | Genome-fragment | NA    | 0     |
| S1_vs_k141_1162   H2gene   | 2002  | No  | NA  | 0  | 0 | Not-determined | Genome-fragment | NA    | 0     |
| S12_vs_k141_118308  full   | 1556  | No  | NA  | 1  | 0 | Low-quality    | Genome-fragment | 4.71  | 0     |
| S8_vs_k141_19960   H2gene  | 1556  | No  | NA  | 1  | 0 | Low-quality    | Genome-fragment | 4.15  | 0     |
| S1_vs_k141_69370   H2gene  | 2020  | No  | NA  | 0  | 0 | Not-determined | Genome-fragment | NA    | 0     |
| S1_vs_k141_96477   H2gene  | 2064  | No  | NA  | 0  | 0 | Not-determined | Genome-fragment | NA    | 0     |
| S8_vs_k141_170500   H2gene | 1556  | No  | NA  | 1  | 0 | Low-quality    | Genome-fragment | 3     | 0     |
| S1_vs_k141_49970   H2gene  | 1543  | No  | NA  | 0  | 1 | Not-determined | Genome-fragment | NA    | 0     |
| S17_vs_k141_91677  full    | 1557  | No  | NA  | 0  | 0 | Low-quality    | Genome-fragment | 2.99  | 0     |
| S9_vs_k141_57782  full     | 1557  | No  | NA  | 2  | 0 | Low-quality    | Genome-fragment | 3.83  | 0     |
| S1_vs_k141_13636   H2gene  | NA    | NA  | NA  | 0  | 1 | Not-determined | Genome-fragment | NA    | 0     |
| S9_vs_k141_5103  full      | 1557  | No  | NA  | 0  | 0 | Low-quality    | Genome-fragment | 3.54  | 0     |
| S14_extracted_k141_102728  | 1557  | No  | NA  | 3  | 0 | Low-quality    | Genome-fragment | 5.04  | 0     |
| S1_vs_k141_30448   H2gene  | 1307  | No  | NA  | 0  | 0 | Not-determined | Genome-fragment | NA    | 0     |
| S1_vs_k141_97459   H2gene  | 1771  | No  | NA  | 0  | 0 | Not-determined | Genome-fragment | NA    | 0     |
| S1_vs_k141_84240   H2gene  | 1023  | No  | NA  | 0  | 1 | Not-determined | Genome-fragment | NA    | 0     |
| S1_vs_k141_155806  full    | 1557  | No  | NA  | 3  | 0 | Low-quality    | Genome-fragment | 3.26  | 0     |
| S1_vs_k141_50613  full     | 1557  | No  | NA  | 0  | 0 | Low-quality    | Genome-fragment | 2.72  | 0     |
| S3_vs_k141_96818  full     | 1557  | No  | NA  | 0  | 0 | Low-quality    | Genome-fragment | 2.73  | 0     |
| S1_vs_k141_51427   H2gene  | 1344  | No  | NA  | 0  | 0 | Not-determined | Genome-fragment | NA    | 0     |
| S2_vs_k141_2382  full      | 1557  | No  | NA  | 0  | 0 | Low-quality    | Genome-fragment | 1.16  | 0     |
| S1_vs_k141_24665   H2gene  | 1333  | No  | NA  | 0  | 0 | Not-determined | Genome-fragment | NA    | 0     |
| S1_vs_k141_130285  full    | 1557  | Yes | 802 | 1  | 1 | Low-quality    | Genome-fragment | 1.6   | 48.49 |
| S7_vs_11700  full          | 1557  | No  | NA  | 0  | 0 | Low-quality    | Genome-fragment | 0.93  | 0     |
| S16_extracted_121829       | 1557  | No  | NA  | 0  | 0 | Low-quality    | Genome-fragment | 0.97  | 0     |
| S12_extracted_k141_75408   | 1557  | No  | NA  | 0  | 0 | Low-quality    | Genome-fragment | 1.73  | 0     |
| S8_vs_k141_173289  full    | 1557  | No  | NA  | 2  | 0 | Low-quality    | Genome-fragment | 4.09  | 0     |
| S17_vs_k141_124083  full   | 1558  | No  | NA  | 2  | 0 | Low-quality    | Genome-fragment | 1.75  | 0     |
| S1_vs_k141_37190   H2gene  | 1915  | No  | NA  | 0  | 0 | Not-determined | Genome-fragment | NA    | 0     |
| S17_vs_k141_22026  full    | 1558  | No  | NA  | 0  | 0 | Low-quality    | Genome-fragment | 3.46  | 0     |
| S1_vs_k141_144838   H2gene | 1557  | No  | NA  | 0  | 0 | Not-determined | Genome-fragment | NA    | 0     |
| S13_vs_123916  full        | 1558  | No  | NA  | 0  | 1 | Low-quality    | Genome-fragment | 3.2   | 0     |
| S1_vs_k141_145087   H2gene | 1162  | No  | NA  | 0  | 0 | Not-determined | Genome-fragment | NA    | 0     |
| S14_vs_k141_61176  full    | 1558  | No  | NA  | 0  | 0 | Low-quality    | Genome-fragment | 3.6   | 0     |
| S3_extracted_k141_98639    | 1558  | No  | NA  | 0  | 0 | Low-quality    | Genome-fragment | 2.45  | 0     |
| S3_extracted_k141_126731   | 1558  | No  | NA  | 0  | 0 | Low-quality    | Genome-fragment | 2.37  | 0     |
| S5_vs_k141_62141  full     | 1558  | No  | NA  | 0  | 4 | Low-quality    | Genome-fragment | 0.44  | 0     |
| S16_vs_25681  full         | 1558  | No  | NA  | 1  | 0 | Low-quality    | Genome-fragment | 0.57  | 0     |
| S16_vs_59861  full         | 1558  | No  | NA  | 0  | 2 | Low-quality    | Genome-fragment | 2.88  | 0     |
| S10_vs_27922  full         | 1558  | No  | NA  | 1  | 0 | Low-quality    | Genome-fragment | 2.95  | 0     |
| S10_vs_49307  full         | 1558  | No  | NA  | 0  | 1 | Low-quality    | Genome-fragment | 2.1   | 0     |
| S8_extracted_k141_200820   | 1558  | No  | NA  | 0  | 1 | Low-quality    | Genome-fragment | 3.71  | 0     |
| S8_extracted_k141_11231    | 1558  | No  | NA  | 0  | 2 | Low-quality    | Genome-fragment | 1.97  | 0     |
| S9_vs_k141_43872  full     | 1559  | No  | NA  | 0  | 0 | Low-quality    | Genome-fragment | 0.9   | 0     |
| S9_vs_k141_47582  full     | 1559  | No  | NA  | 0  | 0 | Low-quality    | Genome-fragment | 3.71  | 0     |
| S1_vs_k141_149817   H2gene | 1085  | No  | NA  | 0  | 0 | Not-determined | Genome-fragment | NA    | 0     |
| S11_extracted_k141_56375   | 1559  | No  | NA  | 1  | 0 | Low-quality    | Genome-fragment | 3.4   | 0     |
| S14_vs_k141_87725  full    | 1559  | No  | NA  | 0  | 0 | Low-quality    | Genome-fragment | 3.3   | 0     |
| S3_extracted_k141_98820    | 1559  | No  | NA  | 2  | 0 | Low-quality    | Genome-fragment | 5.14  | 0     |
| S1_vs_k141_44716  full     | 1559  | No  | NA  | 1  | 0 | Low-quality    | Genome-fragment | 3.74  | 0     |
| S1_vs_k141_146363   H2gene | 1220  | No  | NA  | 0  | 0 | Not-determined | Genome-fragment | NA    | 0     |
| S3_vs_k141_22171  full     | 1559  | No  | NA  | 0  | 1 | Low-quality    | Genome-fragment | 1.84  | 0     |
| S1_vs_k141_39058   H2gene  | 1072  | No  | NA  | 0  | 0 | Not-determined | Genome-fragment | NA    | 0     |
| S1_vs_k141_150696   H2gene | 1661  | No  | NA  | 0  | 0 | Not-determined | Genome-fragment | NA    | 0     |
| S7_vs_87108  full          | 1559  | No  | NA  | 0  | 0 | Low-quality    | Genome-fragment | 3.14  | 0     |
| S16_extracted_57523        | 1559  | No  | NA  | 0  | 0 | Low-quality    | Genome-fragment | 4.22  | 0     |
| S1_vs_k141_158282   H2gene | 1084  | No  | NA  | 0  | 0 | Not-determined | Genome-fragment | NA    | 2.26  |
| S16_vs_27705  full         | 1559  | No  | NA  | 0  | 0 | Low-quality    | Genome-fragment | 2.15  | 0     |
| S16_vs_136280  full        | 1559  | No  | NA  | 0  | 0 | Low-quality    | Genome-fragment | 3.28  | 0     |
| S3_extracted_k141_63761    | 6864  | No  | NA  | 0  | 1 | Not-determined | Genome-fragment | NA    | 0     |
| S3_extracted_k141_15957    | 2626  | No  | NA  | 0  | 0 | Not-determined | Genome-fragment | NA    | 0     |
| S3_extracted_k141_71750    | 1580  | No  | NA  | 0  | 0 | Not-determined | Genome-fragment | NA    | 0     |
| S16_vs_172320  full        | 1559  | No  | NA  | 2  | 0 | Low-quality    | Genome-fragment | 3.31  | 0     |
| S8_extracted_k141_63800    | 7289  | No  | NA  | 0  | 6 | Not-determined | Genome-fragment | NA    | 0     |
| S10_vs_49610  full         | 1559  | No  | NA  | 0  | 0 | Low-quality    | Genome-fragment | 3.46  | 0     |
| S15_extracted_64024        | 1559  | No  | NA  | 0  | 0 | Low-quality    | Genome-fragment | 3.47  | 0     |
| S3_extracted_k141_111632   | 3684  | No  | NA  | 0  | 3 | Not-determined | Genome-fragment | NA    | 0     |
| S3_extracted_k141_63814    | 2579  | No  | NA  | 0  | 0 | Not-determined | Genome-fragment | NA    | 0     |
| S3_extracted_k141_47927    | 2902  | No  | NA  | 0  | 2 | Not-determined | Genome-fragment | NA    | 0     |
| S6_vs_k141_15812  full     | 1559  | No  | NA  | 0  | 0 | Low-quality    | Genome-fragment | 2.79  | 0     |
| S3_extracted_k141_24046    | 1520  | No  | NA  | 0  | 1 | Not-determined | Genome-fragment | NA    | 0     |
| S3_extracted_k141_63825    | 1100  | No  | NA  | 0  | 1 | Not-determined | Genome-fragment | NA    | 0     |
| S8_extracted_k141_106759   | 1559  | No  | NA  | 0  | 2 | Low-quality    | Genome-fragment | 0.9   | 0     |
| S3_extracted_k141_73819    | 1666  | No  | NA  | 0  | 2 | Not-determined | Genome-fragment | NA    | 0     |
| S8_vs_k141_153394  full    | 1559  | No  | NA  | 0  | 0 | Low-quality    | Genome-fragment | 2.65  | 0     |
| S3_extracted_k141_87692    | 15849 | No  | NA  | 0  | 7 | Not-determined | Genome-fragment | NA    | 0     |
| S3_extracted_k141_79771    | 1114  | No  | NA  | 0  | 0 | Not-determined | Genome-fragment | NA    | 0     |
| S3_extracted_k141_31936    | 1409  | No  | NA  | 0  | 1 | Not-determined | Genome-fragment | NA    | 0     |
| S1_extracted_k141_158613   | 1560  | No  | NA  | 0  | 0 | Low-quality    | Genome-fragment | 2.23  | 0     |
| S3_extracted_k141_73851    | 3053  | No  | NA  | 0  | 1 | Not-determined | Genome-fragment | NA    | 4.03  |
| S2_vs_k141_6358  full      | 1560  | No  | NA  | 2  | 0 | Low-quality    | Genome-fragment | 100   | 0     |
| S3_extracted_k141_8058     | 49145 | No  | NA  | 19 | 0 | High-quality   | High-quality    | 3.49  | 0     |
| S16_vs_57802  full         | 1560  | No  | NA  | 0  | 0 | Low-quality    | Genome-fragment | NA    | 0     |
| S3_extracted_k141_159629   | 1225  | No  | NA  | 0  | 1 | Not-determined | Genome-fragment | NA    | 0     |
| S3_extracted_k141_59225    | 1550  | No  | NA  | 0  | 0 | Not-determined | Genome-fragment | NA    | 0     |
| S16_vs_127579  full        | 1560  | No  | NA  | 1  | 0 | Low-quality    | Genome-fragment | 3.18  | 0     |
| S12_extracted_k141_48816   | 1560  | No  | NA  | 3  | 0 | Low-quality    | Genome-fragment | 1.02  | 0     |
| S2_vs_k141_99141  full     | 1560  | No  | NA  | 0  | 0 | Low-quality    | Genome-fragment | 0.6   | 0     |
| S3_extracted_k141_24136    | 1299  | No  | NA  | 0  | 0 | Not-determined | Genome-fragment | NA    | 0     |
| S3_extracted_k141_24139    | 1299  | No  | NA  | 0  | 0 | Not-determined | Genome-fragment | NA    | 0     |
| S8_vs_k141_80673  full     | 1560  | No  | NA  | 0  | 0 | Low-quality    | Genome-fragment | 3.01  | 0     |
| S3_extracted_k141_87730    | 1617  | No  | NA  | 0  | 1 | Not-determined | Genome-fragment | NA    | 0     |
| S3_extracted_k141_8122     | 1035  | No  | NA  | 0  | 0 | Not-determined | Genome-fragment | NA    | 0     |
| S3_extracted_k141_8132     | 1020  | No  | NA  | 0  | 0 | Not-determined | Genome-fragment | NA    | 0     |
| S3_extracted_k141_79795    | 1490  | No  | NA  | 0  | 3 | Not-determined | Genome-fragment | NA    | 0     |
| S3_extracted_k141_55992    | 1464  | No  | NA  | 0  | 1 | Not-determined | Genome-fragment | NA    | 0     |
| S3_extracted_k141_154      | 1278  | No  | NA  | 0  | 0 | Not-determined | Genome-fragment | NA    | 0     |
| S3_extracted_k141_8157     | 2650  | No  | NA  | 0  | 0 | Not-determined | Genome-fragment | NA    | 0     |
| S3_extracted_k141_31988    | 5641  | No  | NA  | 0  | 3 | Not-determined | Genome-fragment | NA    | 0     |
| S8_vs_k141_152193  full    | 1560  | No  | NA  | 1  | 0 | Low-quality    | Genome-fragment | 1.02  | 0     |
| S17_extracted_k141_104599  | 1561  | No  | NA  | 0  | 0 | Low-quality    | Genome-fragment | 1.68  | 0     |
| S3_extracted_k141_56007    | 1473  | No  | NA  | 0  | 1 | Not-determined | Genome-fragment | NA    | 0     |
| S3_extracted_k141_111741   | 1041  | No  | NA  | 0  | 1 | Not-determined | Genome-fragment | NA    | 0     |
| S3_extracted_k141_8164     | 36393 | No  | NA  | 18 | 0 | High-quality   | High-quality    | 94.33 | 0     |
| S3_extracted_k141_95782    | 4790  | No  | NA  | 0  | 3 | Not-determined | Genome-fragment | NA    | 0     |
| S14_extracted_k141_66092   | 1561  | No  | NA  | 2  | 0 | Low-quality    | Genome-fragment | 5.15  | 0     |
| S3_extracted_k141_79891    | 1205  | No  | NA  | 0  | 1 | Not-determined | Genome-fragment | NA    | 0     |
| S3_extracted_k141_39992    | 2000  | No  | NA  | 0  | 0 | Not-determined | Genome-fragment | NA    | 0     |
| S14_vs_k141_9817  full     | 1561  | No  | NA  | 1  | 0 | Low-quality    | Genome-fragment | 3.91  | 0     |
| S3_extracted_k141_116277   | 1561  | No  | NA  | 0  |   |                |                 |       |       |



|                           |            |       |     |     |    |   |                |                 |       |       |
|---------------------------|------------|-------|-----|-----|----|---|----------------|-----------------|-------|-------|
| S14_vs_k141_88862         | [full]     | 1562  | No  | NA  | 1  | 0 | Low-quality    | Genome-fragment | 3.2   | 0     |
| S14_vs_k141_35809         | [full]     | 1562  | No  | NA  | 0  | 1 | Low-quality    | Genome-fragment | 3.59  | 0     |
| S3_extracted_k141_56214   |            | 2303  | No  | NA  | 0  | 0 | Not-determined | Genome-fragment | NA    | 0     |
| S3_extracted_k141_8477    |            | 2063  | No  | NA  | 0  | 2 | Not-determined | Genome-fragment | NA    | 0     |
| S3_extracted_k141_103951  |            | 1216  | No  | NA  | 0  | 1 | Not-determined | Genome-fragment | NA    | 0     |
| S3_extracted_k141_96116   |            | 1030  | No  | NA  | 0  | 2 | Not-determined | Genome-fragment | NA    | 0     |
| S14_vs_k141_108940        | [H2genome] | 1562  | No  | NA  | 1  | 0 | Low-quality    | Genome-fragment | 3.89  | 0     |
| S3_extracted_k141_80111   |            | 1396  | No  | NA  | 0  | 0 | Not-determined | Genome-fragment | NA    | 0     |
| S3_extracted_k141_445     |            | 3363  | No  | NA  | 0  | 0 | Not-determined | Genome-fragment | NA    | 0     |
| S3_extracted_k141_32316   |            | 1129  | No  | NA  | 0  | 0 | Not-determined | Genome-fragment | NA    | 0     |
| S3_extracted_k141_16146   |            | 3358  | No  | NA  | 0  | 0 | Not-determined | Genome-fragment | NA    | 0     |
| S3_extracted_k141_87970   |            | 1640  | No  | NA  | 0  | 2 | Not-determined | Genome-fragment | NA    | 0     |
| S3_extracted_k141_111893  |            | 34477 | No  | NA  | 24 | 0 | Complete       | High-quality    | 100   | 0     |
| S3_extracted_k141_56240   |            | 1071  | No  | NA  | 0  | 1 | Not-determined | Genome-fragment | NA    | 0     |
| S5_vs_k141_78756          | [full]     | 1562  | No  | NA  | 1  | 0 | Low-quality    | Genome-fragment | 1.81  | 0     |
| S3_extracted_k141_40293   |            | 1436  | No  | NA  | 0  | 2 | Not-determined | Genome-fragment | NA    | 0     |
| S5_vs_k141_38295          | [full]     | 1562  | Yes | 921 | 1  | 1 | Low-quality    | Genome-fragment | 0.5   | 41.04 |
| S3_extracted_k141_56251   |            | 1073  | No  | NA  | 0  | 1 | Not-determined | Genome-fragment | NA    | 0     |
| S3_extracted_k141_96141   |            | 1285  | No  | NA  | 0  | 0 | Not-determined | Genome-fragment | NA    | 0     |
| S3_extracted_k141_64175   |            | 12906 | No  | NA  | 0  | 5 | Not-determined | Genome-fragment | NA    | 0     |
| S3_extracted_k141_104028  |            | 2963  | No  | NA  | 0  | 0 | Not-determined | Genome-fragment | NA    | 0     |
| S7_vs_8853                | [full]     | 1562  | No  | NA  | 0  | 0 | Low-quality    | Genome-fragment | 2.75  | 0     |
| S3_extracted_k141_119940  |            | 1020  | No  | NA  | 0  | 1 | Not-determined | Genome-fragment | NA    | 0     |
| S16_vs_152644             | [full]     | 1562  | No  | NA  | 0  | 1 | Low-quality    | Genome-fragment | 3.36  | 0     |
| S3_extracted_k141_96156   |            | 1671  | No  | NA  | 0  | 2 | Not-determined | Genome-fragment | NA    | 0     |
| S3_extracted_k141_40269   |            | 2696  | No  | NA  | 0  | 1 | Not-determined | Genome-fragment | NA    | 0     |
| S3_extracted_k141_119967  |            | 1356  | No  | NA  | 0  | 0 | Not-determined | Genome-fragment | NA    | 0     |
| S3_extracted_k141_56261   |            | 3569  | No  | NA  | 0  | 1 | Not-determined | Genome-fragment | NA    | 0     |
| S3_extracted_k141_119991  |            | 1492  | No  | NA  | 0  | 1 | Not-determined | Genome-fragment | NA    | 0     |
| S3_extracted_k141_104061  |            | 4266  | No  | NA  | 0  | 4 | Not-determined | Genome-fragment | NA    | 0     |
| S10_extracted_70720       |            | 1562  | No  | NA  | 0  | 1 | Low-quality    | Genome-fragment | 4.39  | 0     |
| S3_extracted_k141_16170   |            | 1077  | No  | NA  | 0  | 0 | Not-determined | Genome-fragment | NA    | 0     |
| S3_extracted_k141_64230   |            | 4332  | No  | NA  | 0  | 2 | Not-determined | Genome-fragment | NA    | 0     |
| S3_extracted_k141_72134   |            | 1588  | No  | NA  | 0  | 1 | Not-determined | Genome-fragment | NA    | 0     |
| S3_extracted_k141_64248   |            | 1361  | No  | NA  | 0  | 0 | Not-determined | Genome-fragment | NA    | 0     |
| S3_extracted_k141_86689   |            | 2114  | No  | NA  | 0  | 1 | Not-determined | Genome-fragment | NA    | 0     |
| S3_extracted_k141_72155   |            | 1429  | No  | NA  | 0  | 1 | Not-determined | Genome-fragment | NA    | 0     |
| S3_extracted_k141_40391   |            | 3241  | No  | NA  | 0  | 0 | Not-determined | Genome-fragment | NA    | 0     |
| S3_extracted_k141_569     |            | 1097  | No  | NA  | 0  | 1 | Not-determined | Genome-fragment | NA    | 0     |
| S3_extracted_k141_16193   |            | 1240  | No  | NA  | 0  | 0 | Not-determined | Genome-fragment | NA    | 0     |
| S3_extracted_k141_48433   |            | 2078  | No  | NA  | 0  | 1 | Not-determined | Genome-fragment | NA    | 0     |
| S3_extracted_k141_587     |            | 1073  | No  | NA  | 0  | 1 | Not-determined | Genome-fragment | NA    | 0     |
| S3_extracted_k141_88065   |            | 3070  | No  | NA  | 0  | 4 | Not-determined | Genome-fragment | NA    | 0     |
| S3_extracted_k141_32494   |            | 1302  | No  | NA  | 0  | 1 | Not-determined | Genome-fragment | NA    | 0     |
| S3_extracted_k141_598     |            | 1015  | No  | NA  | 0  | 1 | Not-determined | Genome-fragment | NA    | 0     |
| S17_vs_k141_96090         | [full]     | 1563  | No  | NA  | 0  | 0 | Low-quality    | Genome-fragment | 2.62  | 0     |
| S3_extracted_k141_602     |            | 4744  | No  | NA  | 0  | 2 | Not-determined | Genome-fragment | NA    | 0     |
| S17_vs_k141_51117         | [full]     | 1563  | No  | NA  | 3  | 0 | Low-quality    | Genome-fragment | 4.32  | 0     |
| S14_extracted_k141_88187  |            | 1563  | No  | NA  | 0  | 0 | Low-quality    | Genome-fragment | 5.16  | 0     |
| S3_extracted_k141_104128  |            | 1149  | No  | NA  | 0  | 1 | Not-determined | Genome-fragment | NA    | 0     |
| S3_extracted_k141_8798    |            | 1107  | No  | NA  | 0  | 0 | Not-determined | Genome-fragment | NA    | 0     |
| S3_extracted_k141_112004  |            | 1092  | No  | NA  | 0  | 0 | Not-determined | Genome-fragment | NA    | 0     |
| S14_extracted_k141_68516  |            | 1563  | No  | NA  | 0  | 0 | Low-quality    | Genome-fragment | 0.59  | 0     |
| S3_extracted_k141_112037  |            | 1016  | No  | NA  | 0  | 1 | Not-determined | Genome-fragment | NA    | 0     |
| S3_extracted_k141_8836    |            | 4175  | No  | NA  | 0  | 0 | Not-determined | Genome-fragment | NA    | 0     |
| S3_extracted_k141_96122   |            | 22007 | No  | NA  | 31 | 0 | Medium-quality | Genome-fragment | 72.48 | 0     |
| S3_extracted_k141_96223   |            | 1084  | No  | NA  | 0  | 1 | Not-determined | Genome-fragment | NA    | 0     |
| S3_extracted_k141_16198   |            | 6117  | No  | NA  | 0  | 3 | Not-determined | Genome-fragment | NA    | 0     |
| S3_extracted_k141_32547   |            | 2913  | No  | NA  | 0  | 1 | Not-determined | Genome-fragment | NA    | 0     |
| S1_vs_k141_111010         | [full]     | 1563  | No  | NA  | 0  | 1 | Low-quality    | Genome-fragment | 0.88  | 0     |
| S3_extracted_k141_88111   |            | 1435  | No  | NA  | 0  | 0 | Not-determined | Genome-fragment | NA    | 0     |
| S7_extracted_20024        |            | 1563  | No  | NA  | 0  | 0 | Low-quality    | Genome-fragment | 2.14  | 0     |
| S8_vs_k141_64366          | [full]     | 1563  | No  | NA  | 0  | 0 | Low-quality    | Genome-fragment | 3.62  | 0     |
| S8_vs_k141_109353         | [full]     | 1563  | No  | NA  | 0  | 0 | Low-quality    | Genome-fragment | 22.81 | 0     |
| S17_extracted_k141_49687  |            | 1564  | No  | NA  | 1  | 0 | Low-quality    | Genome-fragment | 3.28  | 0     |
| S3_extracted_k141_32617   |            | 1719  | No  | NA  | 0  | 0 | Not-determined | Genome-fragment | NA    | 0     |
| S3_extracted_k141_728     |            | 1880  | No  | NA  | 0  | 1 | Not-determined | Genome-fragment | NA    | 0     |
| S3_extracted_k141_32655   |            | 1497  | No  | NA  | 0  | 0 | Not-determined | Genome-fragment | NA    | 0     |
| S3_extracted_k141_64287   |            | 1004  | No  | NA  | 0  | 1 | Not-determined | Genome-fragment | NA    | 0     |
| S11_vs_k141_13585         | [full]     | 1564  | No  | NA  | 0  | 0 | Low-quality    | Genome-fragment | 2.77  | 0     |
| S3_extracted_k141_8875    |            | 1425  | No  | NA  | 0  | 1 | Not-determined | Genome-fragment | NA    | 0     |
| S3_extracted_k141_32677   |            | 3380  | No  | NA  | 0  | 1 | Not-determined | Genome-fragment | NA    | 0     |
| S3_extracted_k141_80287   |            | 44726 | No  | NA  | 31 | 0 | Complete       | High-quality    | 100   | 0     |
| S3_extracted_k141_80292   |            | 1043  | No  | NA  | 0  | 0 | Not-determined | Genome-fragment | NA    | 0     |
| S3_extracted_k141_56363   |            | 34917 | No  | NA  | 28 | 1 | Medium-quality | Genome-fragment | 86.49 | 0     |
| S3_extracted_k141_80303   |            | 1004  | No  | NA  | 0  | 0 | Not-determined | Genome-fragment | NA    | 0     |
| S3_extracted_k141_751     |            | 1233  | No  | NA  | 0  | 0 | Not-determined | Genome-fragment | NA    | 0     |
| S11_vs_k141_92310         | [full]     | 1564  | No  | NA  | 0  | 1 | Low-quality    | Genome-fragment | 3.61  | 0     |
| S3_extracted_k141_48670   |            | 4074  | No  | NA  | 0  | 0 | Not-determined | Genome-fragment | NA    | 0     |
| S3_extracted_k141_48684   |            | 2313  | No  | NA  | 0  | 1 | Not-determined | Genome-fragment | NA    | 0     |
| S11_vs_k141_88233         | [full]     | 1564  | No  | NA  | 0  | 3 | Low-quality    | Genome-fragment | 0.85  | 0     |
| S3_extracted_k141_56449   |            | 1385  | No  | NA  | 0  | 1 | Not-determined | Genome-fragment | NA    | 0     |
| S11_vs_k141_56715         | [full]     | 1564  | No  | NA  | 0  | 1 | Low-quality    | Genome-fragment | 3.39  | 0     |
| S14_extracted_k141_106255 |            | 1564  | No  | NA  | 2  | 0 | Low-quality    | Genome-fragment | 5.16  | 0     |
| S14_vs_k141_53833         | [full]     | 1564  | No  | NA  | 0  | 0 | Low-quality    | Genome-fragment | 3.51  | 0     |
| S3_extracted_k141_96404   |            | 1081  | No  | NA  | 0  | 0 | Not-determined | Genome-fragment | NA    | 0     |
| S3_extracted_k141_104317  |            | 1684  | No  | NA  | 0  | 0 | Not-determined | Genome-fragment | NA    | 0     |
| S3_extracted_k141_9630    |            | 4413  | No  | NA  | 0  | 1 | Not-determined | Genome-fragment | NA    | 0     |
| S3_extracted_k141_56503   |            | 2356  | No  | NA  | 0  | 0 | Not-determined | Genome-fragment | NA    | 0     |
| S16_extracted_37937       |            | 1564  | No  | NA  | 0  | 0 | Low-quality    | Genome-fragment | 1.38  | 0     |
| S3_extracted_k141_16269   |            | 4908  | No  | NA  | 0  | 3 | Not-determined | Genome-fragment | NA    | 0     |
| S3_extracted_k141_9046    |            | 6983  | No  | NA  | 0  | 0 | Not-determined | Genome-fragment | NA    | 0     |
| S3_extracted_k141_32819   |            | 1314  | No  | NA  | 0  | 2 | Not-determined | Genome-fragment | NA    | 0     |
| S3_extracted_k141_9074    |            | 2520  | No  | NA  | 0  | 1 | Not-determined | Genome-fragment | NA    | 0     |
| S16_extracted_172017      |            | 1564  | No  | NA  | 0  | 0 | Low-quality    | Genome-fragment | 1.44  | 0     |
| S3_extracted_k141_16328   |            | 7310  | No  | NA  | 1  | 6 | Not-determined | Genome-fragment | NA    | 0     |
| S16_vs_136361             | [full]     | 1564  | No  | NA  | 1  | 0 | Low-quality    | Genome-fragment | 3.78  | 0     |
| S10_extracted_30108       |            | 1564  | No  | NA  | 0  | 1 | Low-quality    | Genome-fragment | 0.66  | 0     |
| S12_vs_k141_181181        | [H2genome] | 1564  | No  | NA  | 0  | 0 | Low-quality    | Genome-fragment | 2.85  | 0     |
| S3_extracted_k141_112249  |            | 9942  | No  | NA  | 0  | 0 | Not-determined | Genome-fragment | NA    | 0     |
| S3_extracted_k141_56580   |            | 1199  | No  | NA  | 0  | 0 | Not-determined | Genome-fragment | NA    | 0     |
| S6_extracted_k141_27722   |            | 1564  | No  | NA  | 0  | 0 | Low-quality    | Genome-fragment | 1.65  | 0     |
| S17_vs_k141_39022         | [full]     | 1565  | No  | NA  | 1  | 0 | Low-quality    | Genome-fragment | 3.97  | 0     |
| S3_extracted_k141_9147    |            | 5981  | No  | NA  | 0  | 4 | Not-determined | Genome-fragment | NA    | 0     |
| S3_extracted_k141_9154    |            | 3014  | No  | NA  | 0  | 3 | Not-determined | Genome-fragment | NA    | 0     |
| S3_extracted_k141_24676   |            | 1642  | No  | NA  | 0  | 1 | Not-determined | Genome-fragment | NA    | 0     |
| S11_extracted_k141_13170  |            | 1565  | No  | NA  | 1  | 0 | Low-quality    | Genome-fragment | 4.08  | 0     |
| S3_extracted_k141_80446   |            | 1829  | No  | NA  | 0  | 2 | Not-determined | Genome-fragment | NA    | 0     |
| S3_extracted_k141_56613   |            | 1147  | No  | NA  | 0  | 1 | Not-determined | Genome-fragment | NA    | 0     |
| S3_extracted_k141_88306   |            | 1720  | No  | NA  | 0  | 0 | Not-determined | Genome-fragment | NA    | 0     |
| S3_extracted_k141_80463   |            | 2175  | No  | NA  | 0  | 0 | Not-determined | Genome-fragment | NA    | 0     |
| S3_extracted_k141_77769   |            | 1442  | No  | NA  | 0  | 0 | Not-determined | Genome-fragment | NA    | 0     |
| S14_extracted_k141_30535  |            | 1565  | No  | NA  | 1  | 0 | Low-quality    | Genome-fragment | 5.02  | 0     |
| S14_extracted_k141_54060  |            | 1565  | No  | NA  | 0  | 2 | Low-quality    | Genome-fragment | 1.88  | 0     |
| S1_vs_k141_12945          | [full]     | 1565  | No  | NA  | 2  | 0 | Low-quality    | Genome-fragment | 3.47  | 0     |
| S3_extracted_k141_96592   |            | 3391  | No  | NA  | 0  | 0 | Not-determined | Genome-fragment | NA    | 0     |
| S5_vs_k141_106468         | [full]     | 1565  | No  | NA  | 0  | 1 | Low-quality    | Genome-fragment | 0.58  | 0     |
| S10_vs_1788               | [full]     | 1565  | No  | NA  | 2  | 0 | Low-quality    | Genome-fragment | 3.95  | 0     |
| S3_extracted_k141_56715   |            | 1188  | No  | NA  | 0  | 0 | Not-determined | Genome-fragment | NA    | 0     |
| S10_vs_88825              | [H2genome] | 1565  | No  | NA  | 0  | 0 | Low-quality    | Genome-fragment | 0.6   | 0     |
| S3_extracted_k141_72651   |            | 6373  | No  | NA  | 0  | 0 | Not-determined | Genome-fragment | NA    | 0     |
| S12_extracted_k141_168647 |            | 1565  | No  | NA  | 0  | 0 | Low-quality    | Genome-fragment | 2.12  | 0     |
| S3_extracted_k141_56726   |            | 14683 | No  | NA  | 0  | 0 | Not-determined | Genome-fragment | NA    | 0     |
| S12_vs_k141_9612          | [full]     | 1565  | No  | NA  | 1  | 0 | Low-quality    | Genome-fragment | 3.77  | 0     |
| S15_extracted_49118       |            | 1565  | No  | NA  | 0  | 1 | Low-quality    | Genome-fragment | 1.25  | 0     |
| S4_extracted_684          |            | 1565  | No  | NA  | 3  | 0 | Low-quality    | Genome-fragment | 5.16  | 0     |
| S3_extracted_k141_96685   |            | 1169  | No  | NA  | 0  | 1 | Not-determined | Genome-fragment | NA    | 0     |
| S3_extracted_k141_72910   |            | 1069  | No  | NA  | 0  | 0 | Not-determined | Genome-fragment | NA    | 0     |
| S3_extracted_k141_9365    |            | 3041  | No  | NA  | 0  | 2 | Not-determined | Genome-fragment | NA    | 0     |
| S6_vs_k141_43058          | [full]     | 1565  | No  | NA  | 0  | 0 | Low-quality    | Genome-fragment | 5.26  | 0     |
| S3_extracted_k141_72923   |            | 4512  | No  | NA  | 0  | 0 | Not-determined | Genome-fragment | NA    | 0     |
| S8_vs_k141_16189          | [full]     | 1565  | No  | NA  | 0  | 0 | Low-quality    | Genome-fragment | 1.69  | 0     |
| S3_extracted_k141_72933   |            | 3320  | No  | NA  | 0  | 2 | Not-determined | Genome-fragment | NA    | 0     |
| S13_extracted_37066       |            | 1566  | No  | NA  | 0  | 1 | Low-quality    | Genome-fragment | 0.67  | 0     |
| S3_extracted_k141_24780   |            | 5675  | No  | NA  | 0  | 4 | Not-determined | Genome-fragment | NA    | 0     |
| S14_vs_k141_2887          | [H2genome] | 1566  | No  | NA  | 1  | 0 | Low-quality    | Genome-fragment | 3.62  | 0     |
| S3_vs_k141_76849          | [full]     | 1566  | No  | NA  | 1  | 0 | Low-quality    | Genome-fragment | 2.54  | 0     |
| S3_extracted_k141_49022   |            | 1068  | No  | NA  | 0  | 0 | Not-determined | Genome-fragment | NA    | 0     |
| S7_vs_97206               | [H2genome] | 1566  | No  | NA  | 1  | 0 | Low-quality    | Genome-fragment | 3.63  | 0     |
| S                         |            |       |     |     |    |   |                |                 |       |       |



|                            |        |     |      |    |   |                 |                 |       |       |
|----------------------------|--------|-----|------|----|---|-----------------|-----------------|-------|-------|
| 59_vs_k141_62162  full     | 1568   | No  | NA   | 0  | 0 | Low-quality     | Genome-fragment | 2.64  | 0     |
| 53_extracted_k141_96883    | 1382   | No  | NA   | 0  | 0 | Not-determined  | Genome-fragment | NA    | 0     |
| 53_extracted_k141_120266   | 2060   | No  | NA   | 0  | 0 | Not-determined  | Genome-fragment | NA    | 0     |
| 513_vs_99394  full         | 1568   | No  | NA   | 0  | 0 | Low-quality     | Genome-fragment | 0.95  | 0     |
| 55_extracted_k141_40840    | 1568   | No  | NA   | 1  | 0 | Low-quality     | Genome-fragment | 4.53  | 0     |
| 53_extracted_k141_64602    | 2167   | No  | NA   | 0  | 1 | Not-determined  | Genome-fragment | NA    | 0     |
| 53_extracted_k141_1051     | 4374   | No  | NA   | 0  | 3 | Not-determined  | Genome-fragment | NA    | 0     |
| 57_vs_3626  full           | 1568   | No  | NA   | 1  | 0 | Low-quality     | Genome-fragment | 2.68  | 0     |
| 53_extracted_k141_73309    | 1529   | No  | NA   | 0  | 1 | Not-determined  | Genome-fragment | NA    | 0     |
| 57_vs_62647  full          | 1568   | No  | NA   | 1  | 0 | Low-quality     | Genome-fragment | 3.82  | 0     |
| 516_extracted_139875       | 1568   | No  | NA   | 0  | 0 | Low-quality     | Genome-fragment | 1.8   | 0     |
| 53_extracted_k141_80909    | 1595   | No  | NA   | 2  | 1 | Not-determined  | Genome-fragment | NA    | 0     |
| 516_vs_45200  full         | 1568   | No  | NA   | 0  | 0 | Low-quality     | Genome-fragment | 2.41  | 0     |
| 53_extracted_k141_97026    | 4003   | No  | NA   | 0  | 0 | Not-determined  | Genome-fragment | NA    | 0     |
| 53_extracted_k141_40991    | 1141   | No  | NA   | 0  | 1 | Not-determined  | Genome-fragment | NA    | 0     |
| 516_vs_82588  full         | 1568   | No  | NA   | 0  | 0 | Low-quality     | Genome-fragment | 3.43  | 0     |
| 53_extracted_k141_64674    | 7822   | No  | NA   | 0  | 2 | Not-determined  | Genome-fragment | NA    | 0     |
| 53_extracted_k141_88683    | 1372   | No  | NA   | 0  | 0 | Not-determined  | Genome-fragment | NA    | 0     |
| 512_vs_k141_122877  full   | 1568   | No  | NA   | 0  | 0 | Low-quality     | Genome-fragment | 2.41  | 0     |
| 53_extracted_k141_97053    | 6198   | No  | NA   | 0  | 3 | Not-determined  | Genome-fragment | NA    | 0     |
| 515_vs_51281  full         | 1568   | No  | NA   | 4  | 0 | Low-quality     | Genome-fragment | 1.95  | 0     |
| 53_extracted_k141_112476   | 1473   | No  | NA   | 0  | 0 | Not-determined  | Genome-fragment | NA    | 0     |
| 517_vs_k141_70768  102gene | 1569   | Yes | 1107 | 1  | 1 | Low-quality     | Genome-fragment | 2.94  | 29.45 |
| 53_extracted_k141_104699   | 1216   | No  | NA   | 0  | 1 | Not-determined  | Genome-fragment | NA    | 0     |
| 511_extracted_k141_11665   | 1569   | No  | NA   | 1  | 0 | Low-quality     | Genome-fragment | 2.35  | 0     |
| 513_vs_59716  full         | 1569   | No  | NA   | 1  | 0 | Low-quality     | Genome-fragment | 1.18  | 0     |
| 53_extracted_k141_120401   | 1330   | No  | NA   | 0  | 1 | Not-determined  | Genome-fragment | NA    | 0     |
| 55_vs_k141_24287  full     | 1569   | No  | NA   | 0  | 0 | Low-quality     | Genome-fragment | 3.74  | 0     |
| 516_vs_131552  full        | 1569   | No  | NA   | 0  | 0 | Low-quality     | Genome-fragment | 3.56  | 0     |
| 512_extracted_k141_132728  | 1569   | No  | NA   | 2  | 0 | Low-quality     | Genome-fragment | 3.44  | 0     |
| 53_extracted_k141_120409   | 4421   | No  | NA   | 0  | 3 | Not-determined  | Genome-fragment | NA    | 0     |
| 512_vs_k141_29766  full    | 1569   | No  | NA   | 1  | 1 | Low-quality     | Genome-fragment | 2.55  | 0     |
| 515_vs_29613  full         | 1569   | No  | NA   | 1  | 0 | Low-quality     | Genome-fragment | 3.22  | 0     |
| 53_extracted_k141_64743    | 4930   | No  | NA   | 0  | 3 | Not-determined  | Genome-fragment | NA    | 0     |
| 53_extracted_k141_81118    | 1028   | No  | NA   | 0  | 0 | Not-determined  | Genome-fragment | NA    | 0     |
| 53_extracted_k141_10471    | 3951   | No  | NA   | 1  | 0 | Not-determined  | Genome-fragment | NA    | 0     |
| 53_extracted_k141_33389    | 17765  | No  | NA   | 8  | 0 | High-quality    | High-quality    | 91.08 | 0     |
| 515_vs_73644  full         | 1569   | No  | NA   | 0  | 0 | Low-quality     | Genome-fragment | 3.73  | 0     |
| 56_extracted_k141_39574    | 1569   | No  | NA   | 0  | 0 | Low-quality     | Genome-fragment | 3.47  | 0     |
| 58_extracted_k141_131057   | 1569   | No  | NA   | 1  | 0 | Genome-fragment | Genome-fragment | 2.94  | 0     |
| 58_vs_k141_108852  full    | 1569   | No  | NA   | 0  | 0 | Low-quality     | Genome-fragment | 3.32  | 0     |
| 58_vs_k141_153546  full    | 1569   | No  | NA   | 0  | 0 | Low-quality     | Genome-fragment | 3.3   | 0     |
| 514_extracted_k141_75158   | 1570   | No  | NA   | 1  | 0 | Low-quality     | Genome-fragment | 3.58  | 0     |
| 514_vs_k141_68035  full    | 1570   | No  | NA   | 0  | 0 | Low-quality     | Genome-fragment | 3.26  | 0     |
| 53_extracted_k141_112585   | 2640   | No  | NA   | 0  | 2 | Not-determined  | Genome-fragment | NA    | 0     |
| 514_vs_k141_15410  102gene | 1570   | No  | NA   | 0  | 0 | Low-quality     | Genome-fragment | 1.54  | 0     |
| 53_extracted_k141_81165    | 3387   | No  | NA   | 0  | 2 | Not-determined  | Genome-fragment | NA    | 0     |
| 51_vs_k141_51445  full     | 1570   | No  | NA   | 0  | 1 | Low-quality     | Genome-fragment | 0.99  | 0     |
| 53_vs_k141_90465  full     | 1570   | No  | NA   | 0  | 0 | Low-quality     | Genome-fragment | 3.76  | 0     |
| 53_extracted_k141_97131    | 1033   | No  | NA   | 0  | 0 | Not-determined  | Genome-fragment | NA    | 0     |
| 55_vs_k141_44872  full     | 1570   | No  | NA   | 2  | 0 | Low-quality     | Genome-fragment | 2.6   | 0     |
| 516_extracted_120086       | 1570   | No  | NA   | 0  | 0 | Low-quality     | Genome-fragment | 1.99  | 0     |
| 516_vs_27690  full         | 1570   | No  | NA   | 0  | 1 | Low-quality     | Genome-fragment | 3.15  | 0     |
| 512_vs_k141_63288  full    | 1570   | No  | NA   | 1  | 0 | Low-quality     | Genome-fragment | 4.15  | 0     |
| 53_extracted_k141_81200    | 1170   | No  | NA   | 0  | 1 | Not-determined  | Genome-fragment | NA    | 0     |
| 517_vs_k141_14875  full    | 1571   | No  | NA   | 0  | 0 | Low-quality     | Genome-fragment | 3.24  | 0     |
| 53_extracted_k141_16969    | 3277   | No  | NA   | 0  | 2 | Not-determined  | Genome-fragment | NA    | 0     |
| 53_extracted_k141_10983    | 1164   | No  | NA   | 0  | 0 | Not-determined  | Genome-fragment | NA    | 0     |
| 53_extracted_k141_10479    | 1343   | No  | NA   | 0  | 0 | Not-determined  | Genome-fragment | NA    | 0     |
| 517_vs_k141_30258  full    | 1571   | No  | NA   | 3  | 0 | Low-quality     | Genome-fragment | 2.7   | 0     |
| 53_extracted_k141_88868    | 1951   | No  | NA   | 0  | 0 | Not-determined  | Genome-fragment | NA    | 0     |
| 517_vs_k141_165641  full   | 1571   | No  | NA   | 0  | 0 | Low-quality     | Genome-fragment | 2.88  | 0     |
| 53_extracted_k141_13335    | 4084   | No  | NA   | 0  | 2 | Not-determined  | Genome-fragment | NA    | 0     |
| 53_extracted_k141_104842   | 3385   | No  | NA   | 0  | 2 | Not-determined  | Genome-fragment | NA    | 0     |
| 53_extracted_k141_41207    | 3305   | No  | NA   | 0  | 2 | Not-determined  | Genome-fragment | NA    | 0     |
| 53_extracted_k141_120562   | 4356   | No  | NA   | 0  | 2 | Not-determined  | Genome-fragment | NA    | 0     |
| 59_vs_k141_52896  full     | 1571   | No  | NA   | 0  | 0 | Low-quality     | Genome-fragment | 1.88  | 0     |
| 53_extracted_k141_41221    | 3771   | No  | NA   | 0  | 1 | Not-determined  | Genome-fragment | NA    | 0     |
| 514_vs_k141_68771  full    | 1571   | No  | NA   | 0  | 0 | Low-quality     | Genome-fragment | 1.38  | 0     |
| 53_extracted_k141_57197    | 6541   | No  | NA   | 0  | 3 | Not-determined  | Genome-fragment | NA    | 0     |
| 514_vs_k141_54369  102gene | 1571   | No  | NA   | 1  | 0 | Low-quality     | Genome-fragment | 2.87  | 0     |
| 53_extracted_k141_57208    | 5651   | No  | NA   | 0  | 2 | Not-determined  | Genome-fragment | NA    | 0     |
| 53_extracted_k141_17011    | 1421   | No  | NA   | 0  | 0 | Not-determined  | Genome-fragment | NA    | 0     |
| 516_vs_64515  full         | 1571   | No  | NA   | 0  | 0 | Low-quality     | Genome-fragment | 2.6   | 0     |
| 510_vs_40642  full         | 1571   | No  | NA   | 0  | 0 | Low-quality     | Genome-fragment | 2.64  | 0     |
| 53_extracted_k141_64989    | 3887   | No  | NA   | 0  | 2 | Not-determined  | Genome-fragment | NA    | 0     |
| 53_extracted_k141_81302    | 1078   | No  | NA   | 0  | 2 | Not-determined  | Genome-fragment | NA    | 0     |
| 512_extracted_k141_64256   | 1571   | No  | NA   | 2  | 0 | Low-quality     | Genome-fragment | 3.52  | 0     |
| 515_vs_13634  full         | 1571   | No  | NA   | 0  | 1 | Low-quality     | Genome-fragment | 3.07  | 0     |
| 56_vs_k141_49511  full     | 1571   | No  | NA   | 1  | 0 | Low-quality     | Genome-fragment | 3.1   | 0     |
| 53_extracted_k141_73597    | 57020  | No  | NA   | 14 | 4 | Medium-quality  | Genome-fragment | 82.14 | 0     |
| 53_extracted_k141_112772   | 3898   | No  | NA   | 0  | 0 | Not-determined  | Genome-fragment | NA    | 0     |
| 53_extracted_k141_17054    | 1107   | No  | NA   | 0  | 1 | Not-determined  | Genome-fragment | NA    | 0     |
| 53_extracted_k141_57274    | 2988   | No  | NA   | 0  | 2 | Not-determined  | Genome-fragment | NA    | 0     |
| 517_extracted_k141_8178    | 1572   | No  | NA   | 0  | 0 | Low-quality     | Genome-fragment | 0.85  | 0     |
| 53_extracted_k141_25131    | 1164   | No  | NA   | 0  | 0 | Not-determined  | Genome-fragment | NA    | 0     |
| 53_extracted_k141_41255    | 4606   | No  | NA   | 0  | 0 | Not-determined  | Genome-fragment | NA    | 0     |
| 517_extracted_k141_36927   | 1572   | No  | NA   | 0  | 0 | Low-quality     | Genome-fragment | 3.26  | 0     |
| 53_extracted_k141_73718    | 1306   | No  | NA   | 0  | 0 | Not-determined  | Genome-fragment | NA    | 0     |
| 53_extracted_k141_41300    | 1287   | No  | NA   | 0  | 1 | Not-determined  | Genome-fragment | NA    | 0     |
| 53_extracted_k141_73732    | 1705   | No  | NA   | 0  | 1 | Not-determined  | Genome-fragment | NA    | 0     |
| 59_extracted_k141_63775    | 1572   | No  | NA   | 0  | 0 | Low-quality     | Genome-fragment | 2.56  | 0     |
| 53_extracted_k141_88934    | 2723   | No  | NA   | 0  | 0 | Not-determined  | Genome-fragment | NA    | 0     |
| 53_extracted_k141_81426    | 3800   | No  | NA   | 0  | 2 | Not-determined  | Genome-fragment | NA    | 0     |
| 53_extracted_k141_65092    | 1278   | No  | NA   | 0  | 0 | Not-determined  | Genome-fragment | NA    | 0     |
| 53_extracted_k141_57359    | 2182   | No  | NA   | 0  | 0 | Not-determined  | Genome-fragment | NA    | 0     |
| 514_extracted_k141_45070   | 1572   | No  | NA   | 1  | 0 | Low-quality     | Genome-fragment | 1.93  | 0     |
| 514_extracted_k141_35469   | 1572   | No  | NA   | 1  | 0 | Low-quality     | Genome-fragment | 5.1   | 0     |
| 53_extracted_k141_41373    | 1271   | No  | NA   | 0  | 0 | Not-determined  | Genome-fragment | NA    | 0     |
| 53_extracted_k141_49680    | 1447   | No  | NA   | 0  | 1 | Not-determined  | Genome-fragment | NA    | 0     |
| 57_vs_50853  full          | 1572   | No  | NA   | 1  | 0 | Low-quality     | Genome-fragment | 3.55  | 0     |
| 53_extracted_k141_57398    | 1082   | No  | NA   | 0  | 1 | Not-determined  | Genome-fragment | NA    | 0     |
| 53_extracted_k141_120690   | 1337   | No  | NA   | 0  | 1 | Not-determined  | Genome-fragment | NA    | 0     |
| 53_extracted_k141_25163    | 103478 | No  | NA   | 16 | 1 | Complete        | High-quality    | 100   | 0     |
| 53_extracted_k141_25170    | 1434   | No  | NA   | 0  | 0 | Not-determined  | Genome-fragment | NA    | 0     |
| 512_vs_k141_132413  full   | 1572   | No  | NA   | 0  | 0 | Low-quality     | Genome-fragment | 3.17  | 0     |
| 53_extracted_k141_57422    | 15991  | No  | NA   | 8  | 0 | Medium-quality  | Genome-fragment | 70.78 | 0     |
| 53_extracted_k141_73779    | 3335   | No  | NA   | 0  | 0 | Not-determined  | Genome-fragment | NA    | 0     |
| 53_extracted_k141_49708    | 1243   | No  | NA   | 0  | 0 | Not-determined  | Genome-fragment | NA    | 0     |
| 53_extracted_k141_73784    | 1008   | No  | NA   | 0  | 0 | Not-determined  | Genome-fragment | NA    | 0     |
| 53_extracted_k141_1593     | 1003   | No  | NA   | 0  | 1 | Not-determined  | Genome-fragment | NA    | 0     |
| 53_extracted_k141_97354    | 1248   | No  | NA   | 0  | 0 | Not-determined  | Genome-fragment | NA    | 0     |
| 54_extracted_6598          | 1572   | No  | NA   | 4  | 0 | Low-quality     | Genome-fragment | 5.19  | 0     |
| 517_extracted_k141_66881   | 1573   | No  | NA   | 0  | 0 | Low-quality     | Genome-fragment | 0.29  | 0     |
| 53_extracted_k141_73852    | 2670   | No  | NA   | 0  | 0 | Not-determined  | Genome-fragment | NA    | 0     |
| 511_vs_k141_22322  full    | 1573   | No  | NA   | 1  | 0 | Low-quality     | Genome-fragment | 3.59  | 0     |
| 513_vs_5968  full          | 1573   | No  | NA   | 0  | 1 | Low-quality     | Genome-fragment | 1.66  | 0     |
| 53_extracted_k141_47390    | 1573   | No  | NA   | 0  | 0 | Low-quality     | Genome-fragment | 2.97  | 0     |
| 57_vs_11792  full          | 1573   | No  | NA   | 0  | 0 | Low-quality     | Genome-fragment | 4.29  | 0     |
| 53_extracted_k141_17230    | 7606   | No  | NA   | 0  | 3 | Not-determined  | Genome-fragment | NA    | 0     |
| 53_extracted_k141_73893    | 1427   | No  | NA   | 0  | 1 | Not-determined  | Genome-fragment | NA    | 0     |
| 57_vs_80253  full          | 1573   | No  | NA   | 0  | 0 | Low-quality     | Genome-fragment | 1.93  | 0     |
| 53_extracted_k141_112984   | 1158   | No  | NA   | 0  | 0 | Not-determined  | Genome-fragment | NA    | 0     |
| 53_extracted_k141_57481    | 1168   | No  | NA   | 0  | 0 | Not-determined  | Genome-fragment | NA    | 0     |
| 510_vs_18570  full         | 1573   | No  | NA   | 0  | 0 | Low-quality     | Genome-fragment | 2.23  | 0     |
| 517_vs_k141_126823  full   | 1574   | No  | NA   | 0  | 0 | Low-quality     | Genome-fragment | 3.03  | 0     |
| 53_extracted_k141_120799   | 1014   | No  | NA   | 0  | 0 | Not-determined  | Genome-fragment | NA    | 0     |
| 53_extracted_k141_120817   | 1485   | No  | NA   | 0  | 0 | Not-determined  | Genome-fragment | NA    | 0     |
| 53_extracted_k141_30258    | 1640   | No  | NA   | 0  | 0 | Not-determined  | Genome-fragment | NA    | 0     |
| 53_extracted_k141_17280    | 1194   | No  | NA   | 0  | 1 | Not-determined  | Genome-fragment | NA    | 0     |
| 53_extracted_k141_89209    | 4682   | No  | NA   | 0  | 1 | Not-determined  | Genome-fragment | NA    | 0     |
| 59_vs_k141_74183  102gene  | 1574   | No  | NA   | 0  | 0 | Low-quality     | Genome-fragment | 4.14  | 0     |
| 57_extracted_118389        | 1574   | No  | NA   | 0  | 0 | Low-quality     | Genome-fragment | 1.87  | 0     |
| 516_vs_78756  full         | 1574   | No  | NA   | 2  | 0 | Low-quality     | Genome-fragment | 3.74  | 0     |
| 53_extracted_k141_41508    | 3496   | No  | NA   | 0  | 9 | Not-determined  | Genome-fragment | NA    | 0     |
| 53_extracted_k141_17284    | 2016   | No  | NA   | 0  | 0 | Not-determined  | Genome-fragment | NA    | 0     |
| 53_extracted_k141_74010    | 1174   | No  | NA   | 0  | 2 | Not-determined  | Genome-fragment | NA    | 0     |
| 512_vs_k141_142412  full   | 1574   | No  | NA   | 0  | 1 | Low-quality     | Genome-fragment | 1.83  | 0     |
| 51_vs_k141_126860  full    | 1575   | No  | NA   | 0  | 0 | Low-quality     | Genome-fragment | 1.55  | 0     |
| 57_extracted_99362         | 1575   | No  | NA   | 0  | 3 | Low-quality     | Genome-fragment | 4.44  | 0     |
| 516_extracted_140584       | 1575   | No  | NA   | 0  | 0 | Low-quality     | Genome-fragment | 1.89  | 0     |
| 510_extracted_31625        | 1575   | No  | NA   | 0  | 0 | Low-quality     | Genome-fragment | 24.91 | 0     |
| 510_vs_51880  full         | 1575   | No  | NA   | 0  | 1 | Low-quality     | Genome-fragment | 0.84  | 0     |
| 58_vs_k141_154183  102gene | 1575   |     |      |    |   |                 |                 |       |       |



|                             |       |     |     |    |   |                |                 |       |       |
|-----------------------------|-------|-----|-----|----|---|----------------|-----------------|-------|-------|
| S3_extracted_k141_113276    | 1032  | No  | NA  | 0  | 2 | Not-determined | Genome-fragment | NA    | 0     |
| S3_extracted_k141_25513     | 1786  | No  | NA  | 1  | 0 | Not-determined | Genome-fragment | NA    | 0     |
| S3_extracted_k141_33903     | 4718  | No  | NA  | 0  | 3 | Not-determined | Genome-fragment | NA    | 0     |
| S1_extracted_k141_100227    | 1577  | No  | NA  | 0  | 1 | Low-quality    | Genome-fragment | 0.49  | 0     |
| S3_extracted_k141_105869    | 1577  | No  | NA  | 0  | 1 | Low-quality    | Genome-fragment | 0.97  | 0     |
| S3_extracted_k141_57780     | 2820  | No  | NA  | 0  | 2 | Not-determined | Genome-fragment | NA    | 0     |
| S3_extracted_k141_10539     | 8831  | No  | NA  | 0  | 2 | Not-determined | Genome-fragment | NA    | 0     |
| S3_vs_k141_77469[full]      | 1577  | No  | NA  | 0  | 1 | Low-quality    | Genome-fragment | 1.18  | 0     |
| S3_extracted_k141_413725    | 3287  | No  | NA  | 0  | 1 | Not-determined | Genome-fragment | NA    | 0     |
| S7_vs_45166[full]           | 1577  | No  | NA  | 0  | 0 | Low-quality    | Genome-fragment | 0.99  | 0     |
| S3_extracted_k141_25557     | 1688  | No  | NA  | 0  | 0 | Not-determined | Genome-fragment | NA    | 0     |
| S3_extracted_k141_57795     | 4432  | No  | NA  | 0  | 2 | Not-determined | Genome-fragment | NA    | 0     |
| S3_extracted_k141_57797     | 1234  | No  | NA  | 0  | 1 | Not-determined | Genome-fragment | NA    | 0     |
| S16_vs_64603[full]          | 1577  | No  | NA  | 0  | 0 | Low-quality    | Genome-fragment | 4.29  | 0     |
| S15_extracted_73591         | 1577  | No  | NA  | 0  | 1 | Low-quality    | Genome-fragment | 0.27  | 0     |
| S15_vs_74040[full]          | 1577  | No  | NA  | 0  | 0 | Low-quality    | Genome-fragment | 3.6   | 0     |
| S3_extracted_k141_74099     | 1058  | No  | NA  | 0  | 2 | Not-determined | Genome-fragment | NA    | 0     |
| S3_extracted_k141_25593     | 1593  | No  | NA  | 0  | 1 | Not-determined | Genome-fragment | NA    | 0     |
| S3_extracted_k141_91697     | 1092  | No  | NA  | 0  | 0 | Not-determined | Genome-fragment | NA    | 0     |
| S3_extracted_k141_34005     | 4998  | No  | NA  | 0  | 5 | Not-determined | Genome-fragment | NA    | 0     |
| S3_extracted_k141_34009     | 3154  | No  | NA  | 0  | 0 | Not-determined | Genome-fragment | NA    | 0     |
| S3_extracted_k141_105305    | 6712  | No  | NA  | 2  | 2 | Not-determined | Genome-fragment | NA    | 0     |
| S8_vs_k141_134720[full]     | 1577  | No  | NA  | 0  | 0 | Low-quality    | Genome-fragment | 3.68  | 0     |
| S3_extracted_k141_25616     | 2531  | No  | NA  | 0  | 3 | Not-determined | Genome-fragment | NA    | 0     |
| S11_extracted_k141_78336    | 1578  | No  | NA  | 1  | 0 | Low-quality    | Genome-fragment | 2.62  | 0     |
| S3_extracted_k141_81720     | 1333  | No  | NA  | 0  | 1 | Not-determined | Genome-fragment | NA    | 0     |
| S3_extracted_k141_17487     | 2711  | No  | NA  | 0  | 4 | Not-determined | Genome-fragment | NA    | 0     |
| S3_extracted_k141_113441    | 8879  | No  | NA  | 0  | 2 | Not-determined | Genome-fragment | NA    | 0     |
| S13_extracted_133210        | 1578  | No  | NA  | 0  | 0 | Low-quality    | Genome-fragment | 1.73  | 0     |
| S1_extracted_k141_153122    | 1578  | No  | NA  | 1  | 0 | Low-quality    | Genome-fragment | 5.35  | 0     |
| S3_extracted_k141_121169    | 1405  | No  | NA  | 0  | 1 | Not-determined | Genome-fragment | NA    | 0     |
| S3_extracted_k141_65384     | 1035  | No  | NA  | 0  | 1 | Not-determined | Genome-fragment | NA    | 0     |
| S3_extracted_k141_34082     | 1540  | No  | NA  | 0  | 1 | Not-determined | Genome-fragment | NA    | 0     |
| S3_vs_k141_91974[full]      | 1578  | No  | NA  | 0  | 0 | Low-quality    | Genome-fragment | 2.78  | 0     |
| S5_vs_k141_49727[full]      | 1578  | No  | NA  | 2  | 0 | Low-quality    | Genome-fragment | 2.42  | 0     |
| S7_vs_75153[full]           | 1578  | No  | NA  | 0  | 0 | Low-quality    | Genome-fragment | 3.92  | 0     |
| S3_extracted_k141_97659     | 5869  | No  | NA  | 0  | 3 | Not-determined | Genome-fragment | NA    | 0     |
| S10_vs_64349[full]          | 1578  | No  | NA  | 1  | 0 | Low-quality    | Genome-fragment | 2.77  | 0     |
| S12_extracted_k141_124205   | 1578  | No  | NA  | 0  | 0 | Low-quality    | Genome-fragment | 2.49  | 0     |
| S3_extracted_k141_89604     | 1996  | No  | NA  | 0  | 1 | Not-determined | Genome-fragment | NA    | 0     |
| S6_vs_k141_18315[full]      | 1578  | No  | NA  | 0  | 1 | Low-quality    | Genome-fragment | 0.72  | 0     |
| S8_vs_k141_38560[full]      | 1578  | Yes | 632 | 0  | 1 | Low-quality    | Genome-fragment | 1.11  | 59.95 |
| S8_vs_k141_112563[full]     | 1578  | No  | NA  | 0  | 0 | Low-quality    | Genome-fragment | 3.07  | 0     |
| S3_extracted_k141_57903     | 1428  | No  | NA  | 0  | 2 | Not-determined | Genome-fragment | NA    | 0     |
| S9_extracted_k141_38525     | 1579  | No  | NA  | 2  | 0 | Low-quality    | Genome-fragment | 3.84  | 0     |
| S3_extracted_k141_17550     | 1884  | No  | NA  | 0  | 0 | Not-determined | Genome-fragment | NA    | 0     |
| S13_extracted_5074          | 1579  | No  | NA  | 0  | 0 | Low-quality    | Genome-fragment | 2.87  | 0     |
| S13_vs_48542[full]          | 1579  | No  | NA  | 0  | 0 | Low-quality    | Genome-fragment | 1.77  | 0     |
| S14_vs_k141_103571[full]    | 1579  | No  | NA  | 0  | 0 | Low-quality    | Genome-fragment | 3.68  | 0     |
| S3_extracted_k141_34249     | 4827  | No  | NA  | 0  | 0 | Not-determined | Genome-fragment | NA    | 0     |
| S3_extracted_k141_121318    | 2013  | No  | NA  | 0  | 1 | Not-determined | Genome-fragment | NA    | 0     |
| S2_extracted_k141_24362     | 1885  | No  | NA  | 0  | 0 | Not-determined | Genome-fragment | NA    | 0     |
| S5_vs_k141_113514[full]     | 1579  | No  | NA  | 1  | 0 | Low-quality    | Genome-fragment | 3.97  | 0     |
| S3_extracted_k141_17593     | 1000  | No  | NA  | 0  | 1 | Not-determined | Genome-fragment | NA    | 0     |
| S3_extracted_k141_17594     | 3747  | No  | NA  | 0  | 2 | Not-determined | Genome-fragment | NA    | 0     |
| S3_extracted_k141_57952     | 1417  | No  | NA  | 0  | 0 | Not-determined | Genome-fragment | NA    | 0     |
| S3_extracted_k141_17633     | 1359  | No  | NA  | 0  | 0 | Not-determined | Genome-fragment | NA    | 0     |
| S3_extracted_k141_65555     | 2342  | No  | NA  | 0  | 1 | Not-determined | Genome-fragment | NA    | 0     |
| S3_extracted_k141_10970     | 1094  | No  | NA  | 0  | 0 | Not-determined | Genome-fragment | NA    | 0     |
| S7_vs_75148[full]           | 1579  | No  | NA  | 0  | 0 | Low-quality    | Genome-fragment | 2.39  | 0     |
| S12_extracted_k141_105472   | 14209 | No  | NA  | 0  | 3 | Not-determined | Genome-fragment | NA    | 0     |
| S12_extracted_k141_186006   | 1579  | No  | NA  | 0  | 1 | Low-quality    | Genome-fragment | 0.69  | 0     |
| S3_extracted_k141_97723     | 3440  | No  | NA  | 0  | 2 | Not-determined | Genome-fragment | NA    | 0     |
| S12_vs_k141_112785[full]    | 1579  | No  | NA  | 1  | 0 | Low-quality    | Genome-fragment | 3.07  | 0     |
| S3_extracted_k141_112378    | 7330  | No  | NA  | 2  | 2 | Not-determined | Genome-fragment | NA    | 0     |
| S3_extracted_k141_34339     | 1090  | No  | NA  | 0  | 0 | Not-determined | Genome-fragment | NA    | 0     |
| S12_vs_k141_160231[full]    | 1579  | No  | NA  | 0  | 1 | Low-quality    | Genome-fragment | 1.1   | 0     |
| S3_extracted_k141_113607    | 1043  | No  | NA  | 0  | 0 | Not-determined | Genome-fragment | NA    | 0     |
| S3_extracted_k141_65592     | 1745  | No  | NA  | 0  | 0 | Not-determined | Genome-fragment | NA    | 0     |
| S11_extracted_k141_4768     | 1580  | No  | NA  | 2  | 0 | Low-quality    | Genome-fragment | 3.73  | 0     |
| S3_extracted_k141_89686     | 1507  | No  | NA  | 0  | 2 | Not-determined | Genome-fragment | NA    | 0     |
| S3_extracted_k141_121401    | 5972  | No  | NA  | 0  | 7 | Not-determined | Genome-fragment | NA    | 0     |
| S1_vs_k141_34995[full]      | 1580  | No  | NA  | 1  | 0 | Low-quality    | Genome-fragment | 2.73  | 0     |
| S5_extracted_k141_103482    | 1580  | No  | NA  | 2  | 0 | Low-quality    | Genome-fragment | 4.08  | 0     |
| S3_extracted_k141_105311    | 5403  | No  | NA  | 2  | 3 | Not-determined | Genome-fragment | NA    | 0     |
| S16_vs_79584[full]H2gene    | 1580  | No  | NA  | 2  | 0 | Low-quality    | Genome-fragment | 4.6   | 0     |
| S16_vs_79860[full]H2gene    | 1580  | No  | NA  | 2  | 0 | Low-quality    | Genome-fragment | 4.6   | 0     |
| S12_extracted_k141_134134   | 1580  | No  | NA  | 2  | 0 | Low-quality    | Genome-fragment | 4.15  | 0     |
| S3_extracted_k141_11040     | 1100  | No  | NA  | 0  | 2 | Not-determined | Genome-fragment | NA    | 0     |
| S3_extracted_k141_50025     | 4181  | No  | NA  | 0  | 3 | Not-determined | Genome-fragment | NA    | 0     |
| S3_extracted_k141_50029     | 1865  | No  | NA  | 0  | 2 | Not-determined | Genome-fragment | NA    | 0     |
| S3_extracted_k141_110571    | 1165  | No  | NA  | 0  | 0 | Not-determined | Genome-fragment | NA    | 0     |
| S12_extracted_k141_166810   | 1580  | No  | NA  | 0  | 1 | Low-quality    | Genome-fragment | 0.92  | 0     |
| S3_extracted_k141_113688    | 2346  | No  | NA  | 0  | 1 | Not-determined | Genome-fragment | NA    | 0     |
| S3_extracted_k141_65703     | 1078  | No  | NA  | 0  | 1 | Not-determined | Genome-fragment | NA    | 0     |
| S8_extracted_k141_200404    | 1580  | No  | NA  | 0  | 1 | Low-quality    | Genome-fragment | 0.47  | 0     |
| S3_extracted_k141_58115     | 1144  | No  | NA  | 0  | 1 | Not-determined | Genome-fragment | NA    | 0     |
| S3_extracted_k141_42088     | 1028  | No  | NA  | 0  | 0 | Not-determined | Genome-fragment | NA    | 0     |
| S8_vs_k141_76583[full]      | 1580  | No  | NA  | 0  | 0 | Low-quality    | Genome-fragment | 3.92  | 0     |
| S17_vs_k141_158544[full]    | 1581  | No  | NA  | 0  | 0 | Low-quality    | Genome-fragment | 3.87  | 0     |
| S3_extracted_k141_113743    | 1021  | No  | NA  | 0  | 0 | Not-determined | Genome-fragment | NA    | 6.7   |
| S11_vs_k141_67650[full]     | 1581  | No  | NA  | 0  | 0 | Low-quality    | Genome-fragment | 1.88  | 0     |
| S13_vs_40355[full]          | 1581  | No  | NA  | 0  | 0 | Low-quality    | Genome-fragment | 5.21  | 0     |
| S14_extracted_k141_66403    | 1581  | No  | NA  | 3  | 0 | Low-quality    | Genome-fragment | NA    | 0     |
| S3_extracted_k141_81824     | 2111  | No  | NA  | 0  | 0 | Not-determined | Genome-fragment | NA    | 7.21  |
| S3_extracted_k141_80649     | 1581  | No  | NA  | 0  | 0 | Low-quality    | Genome-fragment | 7.21  | 0     |
| S3_extracted_k141_11156     | 1691  | No  | NA  | 0  | 1 | Not-determined | Genome-fragment | NA    | 0     |
| S7_vs_123556[full]          | 1581  | No  | NA  | 0  | 0 | Low-quality    | Genome-fragment | 3.15  | 0     |
| S16_extracted_69261         | 1581  | No  | NA  | 0  | 0 | Low-quality    | Genome-fragment | 3.68  | 0     |
| S3_extracted_k141_50256     | 1613  | No  | NA  | 0  | 0 | Not-determined | Genome-fragment | NA    | 0     |
| S3_extracted_k141_63744     | 2795  | No  | NA  | 0  | 0 | Not-determined | Genome-fragment | NA    | 0     |
| S14_extracted_k141_109960   | 1582  | No  | NA  | 0  | 0 | Low-quality    | Genome-fragment | 5.22  | 0     |
| S14_extracted_k141_15175    | 1582  | No  | NA  | 2  | 0 | Low-quality    | Genome-fragment | 3.48  | 0     |
| S3_extracted_k141_25934     | 1657  | No  | NA  | 0  | 2 | Not-determined | Genome-fragment | NA    | 0     |
| S3_extracted_k141_42108     | 5897  | No  | NA  | 0  | 1 | Not-determined | Genome-fragment | NA    | 0     |
| S3_extracted_k141_50268     | 7115  | No  | NA  | 0  | 4 | Not-determined | Genome-fragment | NA    | 0     |
| S3_extracted_k141_11191     | 1005  | No  | NA  | 0  | 0 | Not-determined | Genome-fragment | NA    | 0     |
| S3_vs_k141_95113[full]      | 1582  | No  | NA  | 0  | 0 | Low-quality    | Genome-fragment | 3.99  | 0     |
| S12_vs_k141_400481[full]    | 1582  | No  | NA  | 0  | 2 | Low-quality    | Genome-fragment | 3.29  | 0     |
| S3_extracted_k141_81868     | 1186  | No  | NA  | 0  | 1 | Not-determined | Genome-fragment | NA    | 0     |
| S3_extracted_k141_65799     | 3333  | No  | NA  | 0  | 2 | Not-determined | Genome-fragment | NA    | 0     |
| S3_extracted_k141_121460    | 1846  | No  | NA  | 0  | 0 | Not-determined | Genome-fragment | NA    | 0     |
| S12_vs_k141_19971[full]     | 1582  | No  | NA  | 1  | 0 | Low-quality    | Genome-fragment | 1.88  | 0     |
| S3_extracted_k141_50328     | 1204  | No  | NA  | 0  | 2 | Not-determined | Genome-fragment | NA    | 0     |
| S2_extracted_k141_58218     | 4514  | No  | NA  | 0  | 1 | Not-determined | Genome-fragment | NA    | 0     |
| S6_extracted_k141_26003     | 1582  | No  | NA  | 0  | 0 | Low-quality    | Genome-fragment | 2.86  | 0     |
| S3_extracted_k141_65838     | 1730  | No  | NA  | 0  | 0 | Not-determined | Genome-fragment | NA    | 0     |
| S3_extracted_k141_11295     | 3811  | No  | NA  | 0  | 0 | Not-determined | Genome-fragment | NA    | 0     |
| S3_extracted_k141_34479     | 2387  | No  | NA  | 0  | 0 | Not-determined | Genome-fragment | NA    | 0     |
| S8_extracted_k141_56860     | 1582  | No  | NA  | 2  | 0 | Low-quality    | Genome-fragment | 4.77  | 0     |
| S9_vs_k141_74607[full]      | 1583  | No  | NA  | 2  | 0 | Low-quality    | Genome-fragment | 3.92  | 0     |
| S13_vs_111027[full]H2gene   | 1583  | No  | NA  | 1  | 0 | Low-quality    | Genome-fragment | 4.13  | 0     |
| S14_vs_k141_31088[full]     | 1583  | No  | NA  | 1  | 0 | Low-quality    | Genome-fragment | 3.47  | 0     |
| S3_extracted_k141_17748     | 96667 | No  | NA  | 12 | 0 | Complete       | High-quality    | 100   | 0     |
| S3_extracted_k141_113708    | 5221  | No  | NA  | 0  | 2 | Not-determined | Genome-fragment | NA    | 0     |
| S1_vs_k141_1837[full]H2gene | 1583  | No  | NA  | 1  | 0 | Low-quality    | Genome-fragment | 3.27  | 0     |
| S3_extracted_k141_17751     | 2472  | No  | NA  | 0  | 2 | Not-determined | Genome-fragment | NA    | 0     |
| S3_extracted_k141_2186      | 55789 | No  | NA  | 0  | 0 | Medium-quality | Genome-fragment | 77.64 | 0     |
| S3_extracted_k141_89872     | 2686  | No  | NA  | 0  | 0 | Not-determined | Genome-fragment | NA    | 0     |
| S3_extracted_k141_50468     | 3198  | No  | NA  | 0  | 1 | Not-determined | Genome-fragment | NA    | 0     |
| S3_extracted_k141_121579    | 1395  | No  | NA  | 0  | 0 | Not-determined | Genome-fragment | NA    | 0     |
| S3_extracted_k141_74484     | 3156  | No  | NA  | 0  | 1 | Not-determined | Genome-fragment | NA    | 0     |
| S3_extracted_k141_113819    | 2649  | No  | NA  | 0  | 1 | Not-determined | Genome-fragment | NA    | 0     |
| S3_extracted_k141_65930     | 1385  | No  | NA  | 0  | 0 | Not-determined | Genome-fragment | NA    | 0     |
| S3_extracted_k141_121593    | 1035  | No  | NA  | 0  | 1 | Not-determined | Genome-fragment | NA    | 0     |
| S3_vs_k141_2878[full]       | 1583  | No  | NA  | 1  | 0 | Low-quality    | Genome-fragment | 2.35  | 0     |
| S7_vs_74395[full]           | 1583  | No  | NA  | 0  | 0 | Low-quality    | Genome-fragment | 3.64  | 0     |
| S3_extracted_k141_26015     | 5582  | No  | NA  | 0  | 3 | Not-determined | Genome-fragment | NA    | 0     |
| S3_extracted_k141_58272     | 1305  | No  | NA  | 0  | 3 | Not-determined | Genome-fragment | NA    | 0     |
| S16_extracted_120447        | 1583  | No  | NA  | 0  | 2 | Low-quality    | Genome-fragment | 0.98  | 0     |
| S16_vs_48478[full]          | 1583  | No  | NA  | 1  | 0 | Low-quality    | Genome-fragment | 3.59  | 0     |
| S3_extracted_k141_11428     | 4546  | No  | NA  | 16 | 1 | High-quality   | High-quality    | 100   | 0     |
| S16_vs_119362[full]         | 1583  | No  | NA  | 0  | 2 | Low-quality    | Genome-fragment | 2.65  | 0     |
| S3_extracted_k141_85915     | 4764  | No  | NA  | 0  | 1 | Not-determined | Genome-fragment | NA    | 0.42  |
| S12_vs_k141_81877[full]     | 1583  | No  | NA  | 0  | 1 | Low-quality    | Genome-fragment | NA    | 0     |



|                           |       |     |       |    |                |                 |    |       |       |
|---------------------------|-------|-----|-------|----|----------------|-----------------|----|-------|-------|
| S3_extracted_k141_17848   | 1274  | NA  | 0     | 0  | Not-determined | Genome-fragment | NA | 0     | 0     |
| S16_vs_110371[full]       | 1584  | NA  | 0     | 1  | Low-quality    | Genome-fragment | NA | 2.01  | 0     |
| S3_extracted_k141_11692   | 3129  | NA  | 0     | 2  | Not-determined | Genome-fragment | NA | 0     | 0     |
| S3_extracted_k141_74707   | 2689  | NA  | 0     | 1  | Not-determined | Genome-fragment | NA | 0     | 0     |
| S3_extracted_k141_17877   | 1720  | NA  | 0     | 0  | Not-determined | Genome-fragment | NA | 0     | 0     |
| S12_extracted_k141_54891  | 1584  | NA  | 0     | 1  | Low-quality    | Genome-fragment | NA | 0.85  | 0     |
| S12_vs_k141_66576[full]   | 1584  | NA  | 1     | 0  | Low-quality    | Genome-fragment | NA | 2.53  | 0     |
| S8_extracted_k141_154642  | 1584  | NA  | 0     | 1  | Low-quality    | Genome-fragment | NA | 2.26  | 0     |
| S9_vs_k141_14769[full]    | 1585  | NA  | 0     | 0  | Low-quality    | Genome-fragment | NA | 1.94  | 0     |
| S9_vs_k141_58390[full]    | 1585  | NA  | 1     | 0  | Low-quality    | Genome-fragment | NA | 1.02  | 0     |
| S1_vs_k141_97950[full]    | 1585  | NA  | 1     | 0  | Low-quality    | Genome-fragment | NA | 2.76  | 0     |
| S3_extracted_k141_24587   | 1213  | NA  | 0     | 0  | Not-determined | Genome-fragment | NA | 0     | 0     |
| S3_extracted_k141_58438   | 3240  | NA  | 0     | 2  | Not-determined | Genome-fragment | NA | 0     | 0     |
| NC1_vf_k141_1922          | 1585  | NA  | 0     | 0  | Low-quality    | Genome-fragment | NA | 2.26  | 0     |
| S3_extracted_k141_90146   | 5479  | NA  | 0     | 3  | Not-determined | Genome-fragment | NA | 3.57  | 0     |
| S16_vs_139186[full]       | 1585  | NA  | 0     | 1  | Low-quality    | Genome-fragment | NA | 0     | 0     |
| S3_extracted_k141_26326   | 2954  | NA  | 0     | 2  | Not-determined | Genome-fragment | NA | 0     | 0     |
| S3_extracted_k141_42501   | 1667  | NA  | 0     | 0  | Not-determined | Genome-fragment | NA | 0     | 0     |
| S3_extracted_k141_106105  | 1801  | NA  | 0     | 2  | Not-determined | Genome-fragment | NA | 0     | 0     |
| S8_vs_k141_41521[full]    | 1585  | NA  | 2     | 0  | Low-quality    | Genome-fragment | NA | 4.61  | 0     |
| S3_extracted_k141_106112  | 1144  | NA  | 0     | 1  | Not-determined | Genome-fragment | NA | 3.76  | 0     |
| S9_vs_k141_77539[full]    | 1586  | NA  | 0     | 2  | Not-determined | Genome-fragment | NA | 0     | 0     |
| S3_extracted_k141_58530   | 1093  | NA  | 0     | 3  | Not-determined | Genome-fragment | NA | 0     | 0     |
| S14_vs_k141_117841[full]  | 1586  | NA  | 0     | 3  | Low-quality    | Genome-fragment | NA | 0.76  | 0     |
| S3_extracted_k141_90207   | 1241  | NA  | 0     | 0  | Not-determined | Genome-fragment | NA | 0     | 0     |
| S3_extracted_k141_50883   | 3400  | NA  | 0     | 2  | Not-determined | Genome-fragment | NA | 0     | 0     |
| S5_vs_k141_48051[full]    | 1586  | NA  | 1     | 0  | Low-quality    | Genome-fragment | NA | 3.5   | 0     |
| S3_extracted_k141_2479    | 1645  | NA  | 0     | 1  | Not-determined | Genome-fragment | NA | 0     | 0     |
| S3_extracted_k141_34687   | 1168  | NA  | 0     | 1  | Not-determined | Genome-fragment | NA | 0     | 0     |
| S7_vs_75321[full]         | 1586  | NA  | 0     | 0  | Low-quality    | Genome-fragment | NA | 4.25  | 0     |
| S3_extracted_k141_17976   | 1376  | NA  | 0     | 0  | Not-determined | Genome-fragment | NA | 0     | 0     |
| S3_extracted_k141_98191   | 1154  | NA  | 0     | 0  | Not-determined | Genome-fragment | NA | 0     | 0     |
| S7_vs_134529[full]        | 1586  | NA  | 0     | 0  | Low-quality    | Genome-fragment | NA | 4.79  | 0     |
| S3_extracted_k141_106165  | 1084  | NA  | 0     | 0  | Not-determined | Genome-fragment | NA | 0     | 0     |
| S10_vs_112309[full]       | 1586  | NA  | 0     | 1  | Low-quality    | Genome-fragment | NA | 0.11  | 0     |
| S10_vs_119797[full]       | 1586  | NA  | 0     | 1  | Low-quality    | Genome-fragment | NA | 3.74  | 0     |
| S3_extracted_k141_82322   | 1218  | NA  | 0     | 3  | Not-determined | Genome-fragment | NA | 0     | 0     |
| S3_extracted_k141_98231   | 7697  | NA  | 0     | 4  | Not-determined | Genome-fragment | NA | 0     | 0     |
| S3_extracted_k141_106187  | 1678  | NA  | 0     | 2  | Not-determined | Genome-fragment | NA | 0     | 0     |
| S8_vs_k141_48749[full]    | 1586  | NA  | 0     | 1  | Low-quality    | Genome-fragment | NA | 3.87  | 0     |
| S17_extracted_k141_162053 | 1587  | NA  | 0     | 0  | Low-quality    | Genome-fragment | NA | 2.93  | 0     |
| S3_extracted_k141_26454   | 1220  | NA  | 0     | 0  | Not-determined | Genome-fragment | NA | 0     | 0     |
| S3_extracted_k141_26461   | 1250  | NA  | 0     | 0  | Not-determined | Genome-fragment | NA | 0     | 0     |
| S3_extracted_k141_26462   | 1160  | NA  | 0     | 1  | Not-determined | Genome-fragment | NA | 0     | 0     |
| S3_extracted_k141_11779   | 1198  | NA  | 0     | 1  | Not-determined | Genome-fragment | NA | 0     | 0     |
| S3_extracted_k141_34731   | 7492  | NA  | 0     | 0  | Not-determined | Genome-fragment | NA | 0     | 0     |
| S11_vs_k141_46142[full]   | 1587  | NA  | 0     | 0  | Low-quality    | Genome-fragment | NA | 2.87  | 0     |
| S11_vs_k141_24019[full]   | 1587  | NA  | 3     | 0  | Low-quality    | Genome-fragment | NA | 3.95  | 0     |
| S14_vs_k141_87850[full]   | 1587  | NA  | 0     | 0  | Low-quality    | Genome-fragment | NA | 2.98  | 0     |
| S1_vs_k141_58878[full]    | 1587  | NA  | 2     | 0  | Low-quality    | Genome-fragment | NA | 2.69  | 0     |
| S3_extracted_k141_42636   | 3335  | NA  | 0     | 1  | Not-determined | Genome-fragment | NA | 0.5   | 0     |
| S3_extracted_k141_90550   | 1587  | NA  | 0     | 0  | Low-quality    | Genome-fragment | NA | 3.18  | 0     |
| S3_vs_k141_114630[full]   | 1587  | NA  | 1     | 0  | Low-quality    | Genome-fragment | NA | 0     | 0     |
| S3_extracted_k141_74915   | 1745  | NA  | 0     | 2  | Not-determined | Genome-fragment | NA | 0     | 0     |
| S7_vs_42026[full]         | 1587  | NA  | 0     | 0  | Low-quality    | Genome-fragment | NA | 2.98  | 0     |
| S3_extracted_k141_11826   | 4132  | NA  | 0     | 4  | Not-determined | Genome-fragment | NA | 0     | 0     |
| S3_extracted_k141_121847  | 1262  | NA  | 0     | 0  | Not-determined | Genome-fragment | NA | 0     | 0     |
| S3_extracted_k141_106267  | 2927  | NA  | 0     | 0  | Not-determined | Genome-fragment | NA | 0     | 0     |
| S3_extracted_k141_26547   | 2641  | NA  | 0     | 1  | Not-determined | Genome-fragment | NA | 0     | 0     |
| S3_extracted_k141_74958   | 8252  | NA  | 0     | 4  | Not-determined | Genome-fragment | NA | 0     | 0     |
| S3_extracted_k141_74961   | 2448  | NA  | 0     | 1  | Not-determined | Genome-fragment | NA | 0     | 0     |
| S3_extracted_k141_34812   | 1128  | NA  | 0     | 1  | Not-determined | Genome-fragment | NA | 0     | 0     |
| S16_extracted_16281       | 1587  | NA  | 0     | 0  | Low-quality    | Genome-fragment | NA | 2.87  | 0     |
| S3_extracted_k141_26589   | 3617  | NA  | 0     | 1  | Not-determined | Genome-fragment | NA | 3.9   | 0     |
| S12_vs_k141_119180[full]  | 1587  | NA  | 0     | 0  | Low-quality    | Genome-fragment | NA | 0.8   | 0     |
| S12_vs_k141_3037[full]    | 1587  | NA  | 1     | 0  | Low-quality    | Genome-fragment | NA | 0     | 0     |
| S3_extracted_k141_58845   | 1499  | NA  | 0     | 1  | Not-determined | Genome-fragment | NA | 0     | 0     |
| S3_extracted_k141_114260  | 1814  | NA  | 0     | 3  | Not-determined | Genome-fragment | NA | 0     | 0     |
| S3_extracted_k141_11876   | 1068  | NA  | 0     | 1  | Not-determined | Genome-fragment | NA | 0     | 0     |
| S3_extracted_k141_42759   | 1245  | NA  | 0     | 2  | Not-determined | Genome-fragment | NA | 0     | 0     |
| S3_extracted_k141_2770    | 1217  | NA  | 0     | 1  | Not-determined | Genome-fragment | NA | 84.86 | 0     |
| S3_extracted_k141_18080   | 46776 | NA  | 16    | 1  | Medium-quality | Genome-fragment | NA | 0     | 0     |
| S3_extracted_k141_75046   | 1309  | NA  | 0     | 0  | Not-determined | Genome-fragment | NA | 0     | 0     |
| S3_extracted_k141_34847   | 1448  | NA  | 0     | 1  | Not-determined | Genome-fragment | NA | 0     | 0     |
| S3_extracted_k141_58913   | 1193  | NA  | 0     | 0  | Not-determined | Genome-fragment | NA | 0     | 0     |
| S6_vs_k141_36466[full]    | 1587  | NA  | 0     | 1  | Low-quality    | Genome-fragment | NA | 0.78  | 0     |
| S3_extracted_k141_90380   | 2387  | NA  | 0     | 1  | Not-determined | Genome-fragment | NA | 0     | 0     |
| S3_extracted_k141_26656   | 4007  | NA  | 0     | 2  | Not-determined | Genome-fragment | NA | 77.08 | 23.6  |
| S3_extracted_k141_106401  | 39810 | Yes | 30429 | 19 | Medium-quality | Genome-fragment | NA | 1.33  | 0     |
| S8_extracted_k141_201475  | 1587  | NA  | 0     | 0  | Low-quality    | Genome-fragment | NA | 0.79  | 0     |
| S11_extracted_k141_09475  | 1588  | NA  | 0     | 2  | Low-quality    | Genome-fragment | NA | 0     | 0     |
| S3_extracted_k141_106405  | 3769  | NA  | 0     | 1  | Not-determined | Genome-fragment | NA | 0     | 0     |
| S3_extracted_k141_75082   | 1018  | NA  | 0     | 1  | Not-determined | Genome-fragment | NA | 0     | 0     |
| S1_vs_k141_09816[full]    | 1588  | NA  | 0     | 1  | Low-quality    | Genome-fragment | NA | 3.57  | 0     |
| S3_extracted_k141_121995  | 1062  | NA  | 0     | 0  | Not-determined | Genome-fragment | NA | 3.51  | 0     |
| S1_vs_k141_92278[full]    | 1588  | NA  | 0     | 0  | Low-quality    | Genome-fragment | NA | 0     | 0     |
| S3_extracted_k141_90416   | 1552  | NA  | 0     | 2  | Not-determined | Genome-fragment | NA | 0     | 0     |
| S3_extracted_k141_11997   | 6497  | NA  | 0     | 2  | Not-determined | Genome-fragment | NA | 0     | 0     |
| S3_extracted_k141_50987   | 1097  | NA  | 0     | 1  | Not-determined | Genome-fragment | NA | 0     | 0     |
| S7_vs_32990[full]         | 1588  | NA  | 0     | 1  | Low-quality    | Genome-fragment | NA | 3.02  | 0     |
| S16_vs_126981[full]       | 1588  | NA  | 2     | 0  | Low-quality    | Genome-fragment | NA | 3.72  | 0     |
| S12_vs_k141_143470[full]  | 1588  | NA  | 0     | 0  | Low-quality    | Genome-fragment | NA | 3.15  | 0     |
| S3_extracted_k141_114355  | 1209  | NA  | 0     | 1  | Not-determined | Genome-fragment | NA | 0     | 0     |
| S3_extracted_k141_114368  | 3685  | NA  | 0     | 3  | Not-determined | Genome-fragment | NA | 0     | 0     |
| S3_extracted_k141_35008   | 1217  | NA  | 0     | 0  | Not-determined | Genome-fragment | NA | 95.34 | 0     |
| S3_extracted_k141_59078   | 5910  | NA  | 2     | 0  | High-quality   | Genome-fragment | NA | 80.6  | 0     |
| S3_extracted_k141_82571   | 25954 | NA  | 16    | 0  | Medium-quality | Genome-fragment | NA | 3.41  | 0     |
| S8_extracted_k141_168405  | 1588  | NA  | 1     | 0  | Low-quality    | Genome-fragment | NA | 4.15  | 0     |
| S17_vs_k141_86007[full]   | 1589  | NA  | 0     | 1  | Low-quality    | Genome-fragment | NA | 0     | 0     |
| S3_extracted_k141_106526  | 4408  | NA  | 0     | 4  | Not-determined | Genome-fragment | NA | 0     | 0     |
| S3_extracted_k141_82615   | 3940  | NA  | 0     | 0  | Not-determined | Genome-fragment | NA | 2.76  | 0     |
| S7_extracted_43862        | 1589  | NA  | 0     | 1  | Low-quality    | Genome-fragment | NA | 0     | 0     |
| S3_extracted_k141_98509   | 1174  | NA  | 0     | 0  | Not-determined | Genome-fragment | NA | 0     | 0     |
| S3_extracted_k141_26817   | 3136  | NA  | 0     | 2  | Not-determined | Genome-fragment | NA | 2.13  | 0     |
| S12_vs_k141_87745[full]   | 1589  | NA  | 0     | 0  | Low-quality    | Genome-fragment | NA | 97.39 | 0     |
| S3_extracted_k141_35073   | 59386 | NA  | 33    | 0  | High-quality   | Genome-fragment | NA | 0     | 0     |
| S3_extracted_k141_90593   | 2469  | NA  | 0     | 1  | Not-determined | Genome-fragment | NA | 5.59  | 0     |
| S3_extracted_k141_11092   | 1051  | NA  | 0     | 0  | Not-determined | Genome-fragment | NA | 1.66  | 0     |
| S12_vs_k141_18181[full]   | 1589  | NA  | 0     | 1  | Low-quality    | Genome-fragment | NA | 1.09  | 0     |
| S12_vs_k141_184491[full]  | 1589  | NA  | 0     | 0  | Low-quality    | Genome-fragment | NA | 0     | 0     |
| S2_extracted_k141_6805    | 1589  | NA  | 0     | 0  | Low-quality    | Genome-fragment | NA | 0     | 0     |
| S3_extracted_k141_11116   | 15486 | NA  | 0     | 2  | Not-determined | Genome-fragment | NA | 0     | 0     |
| S3_extracted_k141_106604  | 5009  | NA  | 0     | 2  | Not-determined | Genome-fragment | NA | 0     | 0     |
| S3_extracted_k141_82741   | 1591  | NA  | 0     | 2  | Not-determined | Genome-fragment | NA | 0     | 0     |
| S3_extracted_k141_43010   | 1181  | NA  | 0     | 1  | Not-determined | Genome-fragment | NA | 0     | 0     |
| S3_extracted_k141_75346   | 1190  | NA  | 0     | 0  | Not-determined | Genome-fragment | NA | 0     | 0     |
| S3_extracted_k141_98588   | 3573  | NA  | 0     | 1  | Not-determined | Genome-fragment | NA | 0.97  | 0     |
| S6_vs_k141_5065[full]     | 1589  | NA  | 0     | 1  | Low-quality    | Genome-fragment | NA | 0.75  | 0     |
| S17_extracted_k141_24655  | 1590  | NA  | 0     | 0  | Low-quality    | Genome-fragment | NA | 0.83  | 14.34 |
| S9_vs_k141_71857[full]    | 1590  | Yes | 1362  | 1  | Low-quality    | Genome-fragment | NA | 3.89  | 0     |
| S3_extracted_k141_2948    | 1404  | NA  | 0     | 2  | Not-determined | Genome-fragment | NA | 0     | 0     |
| S13_vs_24178[full]        | 1590  | NA  | 0     | 0  | Low-quality    | Genome-fragment | NA | 0     | 0     |
| S3_extracted_k141_3012    | 1937  | NA  | 0     | 2  | Not-determined | Genome-fragment | NA | 2.49  | 0     |
| S3_extracted_k141_75400   | 1820  | NA  | 0     | 2  | Not-determined | Genome-fragment | NA | 0     | 0     |
| S14_vs_k141_105749[full]  | 1590  | NA  | 0     | 0  | Low-quality    | Genome-fragment | NA | 0     | 0     |
| S3_extracted_k141_3030    | 1145  | NA  | 0     | 0  | Not-determined | Genome-fragment | NA | 0     | 0     |
| S3_extracted_k141_98647   | 3345  | NA  | 0     | 3  | Not-determined | Genome-fragment | NA | 0     | 0     |
| S3_extracted_k141_12231   | 3908  | NA  | 0     | 0  | Not-determined | Genome-fragment | NA | 3.17  | 0     |
| S16_extracted_24727       | 1590  | NA  | 0     | 0  | Low-quality    | Genome-fragment | NA | 0     | 0     |
| S3_extracted_k141_90684   | 10747 | NA  | 0     | 1  | Not-determined | Genome-fragment | NA | 18.68 | 0     |
| S3_extracted_k141_3050    | 2362  | NA  | 0     | 1  | Not-determined | Genome-fragment | NA | 5.09  | 0     |
| S3_extracted_k141_106759  | 1416  | NA  | 0     | 1  | Not-determined | Genome-fragment | NA | 0     | 0     |
| S16_extracted_128965      | 1590  | NA  | 0     | 0  | Low-quality    | Genome-fragment | NA | 0.47  | 0     |
| S3_extracted_k141_75463   | 1629  | NA  | 0     | 1  | Not-determined | Genome-fragment | NA | 5.23  | 0     |
| S16_vs_59883[full]        | 1590  | NA  | 2     | 0  | Low-quality    | Genome-fragment | NA | 3.24  | 0     |
| S3_extracted_k141_114537  | 1288  | NA  | 0     | 0  | Low-quality    | Genome-fragment | NA | 2.84  | 0     |
| S3_extracted_k141_106789  | 5768  | NA  | 0     | 2  | Not-determined | Genome-fragment | NA | 0     | 0     |
| S3_extracted_k141_66373   | 1303  | NA  | 0     | 1  | Not-determined | Genome-fragment | NA | 1.02  | 0     |
| S3_extracted_k141_27065   | 1115  | NA  | 0     | 2  | Not-determined | Genome-fragment | NA | 0     | 0     |
| S3_extracted_k141_75476   | 1246  | NA  | 0     | 1  | Not-determined | Genome-fragment | NA | 0     | 0     |
| S3_extracted_k141_106805  | 1171  | NA  | 0     | 0  | Not-determined | Genome-fragment | NA | 0     | 0     |
| S3_extracted_k141_98677   | 1008  | NA  | 0     | 0  | Not-determined | Genome-fragment | NA | 0     | 0     |
| S3_extracted_k141_112294  | 1495  | NA  | 0     | 1  | Not-determined | Genome-fragment | NA | 0     | 0     |
| S3_extracted_k141_11      |       |     |       |    |                |                 |    |       |       |



|                          |          |        |    |    |   |                |                 |       |   |
|--------------------------|----------|--------|----|----|---|----------------|-----------------|-------|---|
| S11_vs_k141_94561        | [full]   | 1593   | NA | 0  | 0 | Low-quality    | Genome-fragment | 2.57  | 0 |
| S3_extracted_k141_106993 |          | 1407   | NA | 0  | 2 | Not-determined | Genome-fragment | NA    | 0 |
| S1_vs_k141_63833         | [full]   | 1593   | NA | 3  | 0 | Low-quality    | Genome-fragment | 2.57  | 0 |
| S3_extracted_k141_59402  |          | 1032   | NA | 0  | 0 | Not-determined | Genome-fragment | NA    | 0 |
| S3_extracted_k141_51543  |          | 3007   | NA | 0  | 2 | Not-determined | Genome-fragment | NA    | 0 |
| S3_extracted_k141_90937  |          | 2499   | NA | 0  | 0 | Not-determined | Genome-fragment | NA    | 0 |
| S3_extracted_k141_35583  |          | 1843   | NA | 0  | 2 | Not-determined | Genome-fragment | NA    | 0 |
| S7_extracted_12531       |          | 1593   | NA | 1  | 0 | Low-quality    | Genome-fragment | 1.09  | 0 |
| S3_extracted_k141_51574  |          | 1436   | NA | 0  | 1 | Not-determined | Genome-fragment | NA    | 0 |
| S3_extracted_k141_122283 |          | 1494   | NA | 0  | 1 | Not-determined | Genome-fragment | NA    | 0 |
| S3_extracted_k141_82911  |          | 1770   | NA | 0  | 0 | Not-determined | Genome-fragment | NA    | 0 |
| S3_extracted_k141_66508  |          | 1220   | NA | 0  | 1 | Not-determined | Genome-fragment | NA    | 0 |
| S3_extracted_k141_27199  |          | 1023   | NA | 0  | 0 | Not-determined | Genome-fragment | NA    | 0 |
| S3_extracted_k141_51592  |          | 1981   | NA | 0  | 1 | Not-determined | Genome-fragment | NA    | 0 |
| S7_extracted_31035       |          | 1593   | NA | 2  | 0 | Low-quality    | Genome-fragment | 11.57 | 0 |
| S3_extracted_k141_83240  |          | 8311   | NA | 0  | 2 | Not-determined | Genome-fragment | NA    | 0 |
| S3_extracted_k141_18555  |          | 1083   | NA | 0  | 4 | Not-determined | Genome-fragment | NA    | 0 |
| S3_extracted_k141_12504  |          | 3792   | NA | 0  | 0 | Not-determined | Genome-fragment | NA    | 0 |
| S3_extracted_k141_51628  |          | 3598   | NA | 0  | 0 | Not-determined | Genome-fragment | NA    | 0 |
| S3_extracted_k141_43331  |          | 1926   | NA | 0  | 1 | Not-determined | Genome-fragment | NA    | 0 |
| S3_extracted_k141_35668  |          | 1083   | NA | 0  | 0 | Not-determined | Genome-fragment | NA    | 0 |
| S12_vs_k141_24489        | [full]   | 1593   | NA | 0  | 0 | Low-quality    | Genome-fragment | 2.11  | 0 |
| S6_extracted_k141_160    |          | 1593   | NA | 0  | 1 | Low-quality    | Genome-fragment | 1.29  | 0 |
| S8_extracted_k141_120043 |          | 1593   | NA | 0  | 3 | Low-quality    | Genome-fragment | 0.45  | 0 |
| S3_extracted_k141_27318  |          | 1383   | NA | 0  | 1 | Not-determined | Genome-fragment | NA    | 0 |
| S3_extracted_k141_90000  |          | 4445   | NA | 0  | 1 | Not-determined | Genome-fragment | NA    | 0 |
| S3_extracted_k141_91060  |          | 5014   | NA | 0  | 2 | Not-determined | Genome-fragment | NA    | 0 |
| S3_extracted_k141_99050  |          | 2754   | NA | 0  | 4 | Not-determined | Genome-fragment | NA    | 0 |
| S3_extracted_k141_11572  |          | 1611   | NA | 0  | 2 | Not-determined | Genome-fragment | NA    | 0 |
| S3_extracted_k141_18648  |          | 2100   | NA | 0  | 2 | Not-determined | Genome-fragment | NA    | 0 |
| S8_vs_k141_64113         | [full]   | 1593   | NA | 0  | 0 | Low-quality    | Genome-fragment | 3.53  | 0 |
| S17_extracted_k141_16601 |          | 1594   | NA | 0  | 0 | Low-quality    | Genome-fragment | 6.85  | 1 |
| S17_extracted_k141_88602 |          | 1594   | NA | 4  | 0 | Low-quality    | Genome-fragment | 4.35  | 0 |
| S3_extracted_k141_12598  |          | 7516   | NA | 0  | 1 | Not-determined | Genome-fragment | NA    | 0 |
| S3_extracted_k141_83088  |          | 1311   | NA | 0  | 1 | Not-determined | Genome-fragment | NA    | 0 |
| S3_extracted_k141_27350  |          | 1088   | NA | 0  | 1 | Not-determined | Genome-fragment | NA    | 0 |
| S3_extracted_k141_3288   |          | 1342   | NA | 0  | 0 | Not-determined | Genome-fragment | NA    | 0 |
| S3_extracted_k141_83077  |          | 1135   | NA | 0  | 0 | Not-determined | Genome-fragment | NA    | 0 |
| S3_extracted_k141_123516 |          | 1455   | NA | 1  | 1 | Not-determined | Genome-fragment | NA    | 0 |
| S17_vs_k141_84002        | [full]   | 1594   | NA | 1  | 0 | Low-quality    | Genome-fragment | 2.93  | 0 |
| S3_extracted_k141_51711  |          | 1095   | NA | 0  | 1 | Not-determined | Genome-fragment | NA    | 0 |
| S9_vs_k141_80704         | [full]   | 1594   | NA | 0  | 0 | Low-quality    | Genome-fragment | 2.65  | 0 |
| S3_extracted_k141_107235 |          | 11821  | NA | 0  | 2 | Not-determined | Genome-fragment | NA    | 0 |
| S9_vs_k141_84831         | [full]   | 1594   | NA | 0  | 0 | Low-quality    | Genome-fragment | 3.51  | 0 |
| S11_extracted_k141_34886 |          | 1594   | NA | 0  | 1 | Low-quality    | Genome-fragment | 4.15  | 0 |
| S3_extracted_k141_90697  |          | 3039   | NA | 0  | 2 | Not-determined | Genome-fragment | NA    | 0 |
| S3_extracted_k141_107261 |          | 10076  | NA | 0  | 4 | Not-determined | Genome-fragment | NA    | 0 |
| S3_extracted_k141_7979   |          | 1594   | NA | 0  | 0 | Low-quality    | Genome-fragment | 1.19  | 0 |
| S3_extracted_k141_27433  |          | 2161   | NA | 0  | 0 | Not-determined | Genome-fragment | NA    | 0 |
| S3_extracted_k141_43442  |          | 1134   | NA | 0  | 2 | Not-determined | Genome-fragment | NA    | 0 |
| S3_extracted_k141_122572 |          | 1810   | NA | 0  | 2 | Not-determined | Genome-fragment | NA    | 0 |
| S3_extracted_k141_66696  |          | 1155   | NA | 0  | 2 | Not-determined | Genome-fragment | NA    | 0 |
| S3_extracted_k141_35764  |          | 1785   | NA | 0  | 2 | Not-determined | Genome-fragment | NA    | 0 |
| S5_vs_k141_89026         | [full]   | 1594   | NA | 0  | 0 | Low-quality    | Genome-fragment | 2.74  | 0 |
| S3_extracted_k141_107299 |          | 8491   | NA | 0  | 4 | Not-determined | Genome-fragment | NA    | 0 |
| S3_extracted_k141_91166  |          | 1005   | NA | 0  | 0 | Not-determined | Genome-fragment | NA    | 0 |
| S7_extracted_48754       |          | 1594   | NA | 1  | 0 | Low-quality    | Genome-fragment | 1.18  | 0 |
| S16_extracted_158753     |          | 1594   | NA | 0  | 1 | Low-quality    | Genome-fragment | 1.043 | 0 |
| S16_extracted_164579     |          | 1594   | NA | 0  | 0 | Low-quality    | Genome-fragment | 1.46  | 1 |
| S6_vs_k141_18056         | [full]   | 1594   | NA | 1  | 0 | Low-quality    | Genome-fragment | 2.59  | 0 |
| S8_vs_k141_71575         | [full]   | 1594   | NA | 1  | 0 | Low-quality    | Genome-fragment | 4.47  | 0 |
| S8_vs_k141_178780        | [full]   | 1594   | NA | 0  | 0 | Low-quality    | Genome-fragment | 2.61  | 0 |
| S3_extracted_k141_83256  |          | 1096   | NA | 0  | 0 | Not-determined | Genome-fragment | NA    | 0 |
| S3_extracted_k141_107327 |          | 1042   | NA | 0  | 2 | Not-determined | Genome-fragment | NA    | 0 |
| S3_extracted_k141_50691  |          | 5486   | NA | 0  | 2 | Not-determined | Genome-fragment | NA    | 0 |
| S3_extracted_k141_12744  |          | 4616   | NA | 0  | 1 | Not-determined | Genome-fragment | NA    | 0 |
| S3_extracted_k141_99164  |          | 2282   | NA | 0  | 1 | Not-determined | Genome-fragment | NA    | 0 |
| S3_extracted_k141_81296  |          | 3586   | NA | 0  | 0 | Not-determined | Genome-fragment | NA    | 0 |
| S3_extracted_k141_43531  |          | 1244   | NA | 0  | 1 | Not-determined | Genome-fragment | NA    | 0 |
| S3_extracted_k141_122622 |          | 2909   | NA | 0  | 1 | Not-determined | Genome-fragment | NA    | 0 |
| S3_extracted_k141_43538  |          | 1097   | NA | 0  | 1 | Not-determined | Genome-fragment | NA    | 0 |
| S8_vs_k141_66952         | [full]   | 1594   | NA | 1  | 0 | Low-quality    | Genome-fragment | 3.62  | 0 |
| S11_vs_k141_6190         | [full]   | 1595   | NA | 1  | 0 | Low-quality    | Genome-fragment | 3.75  | 0 |
| S3_extracted_k141_122643 |          | 4665   | NA | 0  | 3 | Not-determined | Genome-fragment | NA    | 0 |
| S3_extracted_k141_12773  |          | 1667   | NA | 0  | 0 | Not-determined | Genome-fragment | NA    | 0 |
| S3_extracted_k141_43554  |          | 1136   | NA | 0  | 0 | Not-determined | Genome-fragment | NA    | 0 |
| S3_extracted_k141_115115 |          | 5094   | NA | 0  | 2 | Not-determined | Genome-fragment | NA    | 0 |
| S3_extracted_k141_12779  |          | 3111   | NA | 0  | 5 | Not-determined | Genome-fragment | NA    | 0 |
| S3_extracted_k141_91272  |          | 1311   | NA | 0  | 0 | Not-determined | Genome-fragment | NA    | 0 |
| S14_vs_k141_7910         | [full]   | 1595   | NA | 0  | 0 | Low-quality    | Genome-fragment | 3.06  | 0 |
| S3_extracted_k141_43554  |          | 1595   | NA | 0  | 0 | Low-quality    | Genome-fragment | 3.45  | 0 |
| S1_extracted_k141_30484  |          | 1595   | NA | 0  | 0 | Low-quality    | Genome-fragment | 2.69  | 0 |
| S3_extracted_k141_122696 |          | 1093   | NA | 0  | 0 | Not-determined | Genome-fragment | NA    | 0 |
| S5_vs_k141_40455         | [full]   | 1595   | NA | 0  | 2 | Low-quality    | Genome-fragment | 1.83  | 0 |
| S3_extracted_k141_50818  |          | 3223   | NA | 0  | 1 | Not-determined | Genome-fragment | NA    | 0 |
| S3_extracted_k141_115164 |          | 4731   | NA | 0  | 3 | Not-determined | Genome-fragment | NA    | 0 |
| S3_extracted_k141_91357  |          | 6746   | NA | 0  | 4 | Not-determined | Genome-fragment | NA    | 0 |
| S7_vs_12990              | [full]   | 1595   | NA | 2  | 0 | Low-quality    | Genome-fragment | 3.09  | 0 |
| S3_extracted_k141_3475   |          | 1209   | NA | 0  | 2 | Not-determined | Genome-fragment | NA    | 0 |
| S3_extracted_k141_51971  |          | 1558   | NA | 0  | 1 | Not-determined | Genome-fragment | NA    | 0 |
| S16_vs_133472            | [full]   | 1595   | NA | 1  | 0 | Low-quality    | Genome-fragment | 3.87  | 0 |
| S16_vs_156025            | [H2gene] | 1595   | NA | 0  | 0 | Low-quality    | Genome-fragment | 4.18  | 0 |
| S3_extracted_k141_66848  |          | 2915   | NA | 0  | 0 | Not-determined | Genome-fragment | NA    | 0 |
| S12_vs_k141_82831        | [full]   | 1595   | NA | 1  | 0 | Low-quality    | Genome-fragment | 2.74  | 0 |
| S3_extracted_k141_18766  |          | 3638   | NA | 0  | 1 | Not-determined | Genome-fragment | NA    | 0 |
| S6_vs_k141_15196         | [full]   | 1595   | NA | 0  | 0 | Low-quality    | Genome-fragment | 4.18  | 0 |
| S3_extracted_k141_3335   |          | 1033   | NA | 0  | 2 | Not-determined | Genome-fragment | NA    | 0 |
| S3_extracted_k141_122750 |          | 2311   | NA | 0  | 0 | Not-determined | Genome-fragment | NA    | 0 |
| S3_extracted_k141_52051  |          | 1069   | NA | 0  | 0 | Not-determined | Genome-fragment | NA    | 0 |
| S13_vs_5405              | [H2gene] | 1596   | NA | 1  | 0 | Low-quality    | Genome-fragment | 3.36  | 0 |
| S3_extracted_k141_52059  |          | 4653   | NA | 0  | 2 | Not-determined | Genome-fragment | NA    | 0 |
| S3_extracted_k141_52060  |          | 4530   | NA | 0  | 1 | Not-determined | Genome-fragment | NA    | 0 |
| S3_extracted_k141_83450  |          | 1234   | NA | 0  | 1 | Not-determined | Genome-fragment | NA    | 0 |
| S1_extracted_k141_106538 |          | 1596   | NA | 0  | 0 | Low-quality    | Genome-fragment | 2.37  | 0 |
| S5_extracted_k141_140268 |          | 1596   | NA | 0  | 0 | Low-quality    | Genome-fragment | 4.36  | 0 |
| S5_vs_k141_124891        | [full]   | 1596   | NA | 1  | 0 | Low-quality    | Genome-fragment | 3.15  | 0 |
| S5_vs_k141_76580         | [full]   | 1596   | NA | 1  | 0 | Low-quality    | Genome-fragment | 4.78  | 0 |
| S16_extracted_39964      |          | 1596   | NA | 1  | 0 | Low-quality    | Genome-fragment | 2.41  | 0 |
| S3_extracted_k141_12893  |          | 1596   | NA | 0  | 0 | Not-determined | Genome-fragment | NA    | 0 |
| S16_vs_33610             | [full]   | 1596   | NA | 0  | 0 | Low-quality    | Genome-fragment | 4.44  | 0 |
| S3_extracted_k141_27642  |          | 6009   | NA | 0  | 6 | Not-determined | Genome-fragment | NA    | 0 |
| S10_extracted_1018       |          | 1596   | NA | 0  | 0 | Low-quality    | Genome-fragment | 3.09  | 0 |
| S3_extracted_k141_83505  |          | 1238   | NA | 0  | 1 | Not-determined | Genome-fragment | NA    | 0 |
| S12_vs_k141_68273        | [full]   | 1596   | NA | 1  | 0 | Low-quality    | Genome-fragment | 2.58  | 0 |
| S12_vs_45970             | [full]   | 1597   | NA | 2  | 0 | Low-quality    | Genome-fragment | 0.72  | 0 |
| S3_extracted_k141_36008  |          | 4645   | NA | 0  | 0 | Not-determined | Genome-fragment | NA    | 0 |
| S3_extracted_k141_83536  |          | 15430  | NA | 7  | 0 | Medium-quality | Genome-fragment | 66.36 | 0 |
| S3_extracted_k141_18829  |          | 88825  | NA | 15 | 2 | Complete       | High-quality    | 100   | 0 |
| S3_extracted_k141_36063  |          | 3368   | NA | 0  | 0 | Not-determined | Genome-fragment | NA    | 0 |
| S13_vs_65500             | [full]   | 1597   | NA | 0  | 1 | Low-quality    | Genome-fragment | 1.47  | 0 |
| S3_extracted_k141_36070  |          | 1978   | NA | 0  | 0 | Not-determined | Genome-fragment | NA    | 0 |
| S3_extracted_k141_83560  |          | 3157   | NA | 0  | 1 | Not-determined | Genome-fragment | NA    | 0 |
| S3_extracted_k141_91556  |          | 3824   | NA | 0  | 2 | Not-determined | Genome-fragment | NA    | 0 |
| S3_extracted_k141_83583  |          | 2090   | NA | 0  | 1 | Not-determined | Genome-fragment | NA    | 0 |
| S3_extracted_k141_91582  |          | 2241   | NA | 0  | 0 | Not-determined | Genome-fragment | NA    | 0 |
| S5_vs_k141_104893        | [full]   | 1597   | NA | 1  | 0 | Low-quality    | Genome-fragment | 2.21  | 0 |
| S3_extracted_k141_115304 |          | 100971 | NA | 16 | 1 | Complete       | High-quality    | 100   | 0 |
| S3_extracted_k141_36093  |          | 14516  | NA | 0  | 0 | Not-determined | Genome-fragment | NA    | 0 |
| S3_extracted_k141_107482 |          | 7654   | NA | 0  | 3 | Not-determined | Genome-fragment | NA    | 0 |
| S3_extracted_k141_60053  |          | 2649   | NA | 0  | 1 | Not-determined | Genome-fragment | NA    | 0 |
| S5_vs_k141_48057         | [full]   | 1597   | NA | 1  | 0 | Low-quality    | Genome-fragment | 3.52  | 0 |
| S3_extracted_k141_60075  |          | 3445   | NA | 0  | 0 | Not-determined | Genome-fragment | NA    | 0 |
| S3_extracted_k141_60085  |          | 1667   | NA | 0  | 1 | Not-determined | Genome-fragment | NA    | 0 |
| S7_vs_45085              | [full]   | 1597   | NA | 1  | 0 | Low-quality    | Genome-fragment | 3.89  | 0 |
| S12_extracted_k141_72777 |          | 1597   | NA | 2  | 0 | Low-quality    | Genome-fragment | 3.79  | 0 |
| S3_extracted_k141_60095  |          | 3335   | NA | 0  | 2 | Not-determined | Genome-fragment | NA    | 0 |
| S3_extracted_k141_60112  |          | 1467   | NA | 0  | 2 | Not-determined | Genome-fragment | NA    | 0 |
| S3_extracted_k141_76243  |          | 1302   | NA | 0  | 1 | Not-determined | Genome-fragment | NA    | 0 |
| S12_vs_k141_18949        | [full]   | 1597   | NA | 1  | 0 | Low-quality    | Genome-fragment | 4.36  | 0 |
| S3_extracted_k141_13075  |          | 4326   | NA | 0  | 3 | Not-determined | Genome-fragment | NA    | 0 |
| S3_extracted_k141_52386  |          | 1063   | NA | 0  | 1 | Not-determined | Genome-fragment | NA    | 0 |
| S3_extracted_k141_60147  |          | 5130   | NA | 0  | 2 | Not-determined | Genome-fragment | NA    | 0 |
| S2_extracted_k141_13592  |          | 1597   | NA | 0  | 1 | Low-quality    | Genome-fragment | 2.43  | 0 |
| S3_extracted_k141_52418  |          | 1212   | NA | 0  | 0 | Not-determined | Genome-fragment | NA    | 0 |
| S3_extracted_k141_91677  |          | 5510   | NA | 0  | 1 | Not-determined | Genome-fragment | NA    | 0 |
| S6_extracted_k141_25454  |          | 1597   | NA | 1  | 0 | Low-quality    | Genome-fragment | 3.77  | 0 |
| S8_extracted_k141_71753  |          | 1597   | NA | 0  | 2 | Low-quality    | Genome-fragment | 0.71  | 0 |
| S3_extracted_k141_121290 |          |        |    |    |   |                |                 |       |   |



|                                |       |    |    |    |    |                |                 |       |   |
|--------------------------------|-------|----|----|----|----|----------------|-----------------|-------|---|
| S2_extracted_k141_19419        | 1598  | No | NA | 0  | 0  | Low-quality    | Genome-fragment | 1.66  | 0 |
| S8_extracted_k141_25157        | 1598  | No | NA | 0  | 0  | Low-quality    | Genome-fragment | 3.76  | 0 |
| S3_extracted_k141_91865        | 3274  | No | NA | 0  | 0  | Not-determined | Genome-fragment | NA    | 0 |
| S3_extracted_k141_107768       | 1180  | No | NA | 0  | 0  | Not-determined | Genome-fragment | NA    | 0 |
| S8_vs_k141_19431  full         | 1598  | No | NA | 0  | 0  | Low-quality    | Genome-fragment | 18.16 | 0 |
| S11_vs_k141_136791  full       | 1599  | No | NA | 0  | 0  | Low-quality    | Genome-fragment | 2.31  | 0 |
| S3_extracted_k141_107799       | 5072  | No | NA | 0  | 2  | Not-determined | Genome-fragment | NA    | 0 |
| S3_extracted_k141_13359        | 1431  | No | NA | 0  | 2  | Not-determined | Genome-fragment | NA    | 0 |
| S3_extracted_k141_19190        | 13513 | No | NA | 0  | 0  | Not-determined | Genome-fragment | NA    | 0 |
| S3_extracted_k141_91875        | 1129  | No | NA | 0  | 1  | Not-determined | Genome-fragment | NA    | 0 |
| S11_vs_k141_246691  full       | 1599  | No | NA | 2  | 0  | Low-quality    | Genome-fragment | 2.4   | 0 |
| S1_extracted_k141_27994        | 1599  | No | NA | 0  | 1  | Low-quality    | Genome-fragment | 0.6   | 0 |
| S10_vs_57536  full             | 1599  | No | NA | 0  | 3  | Low-quality    | Genome-fragment | 2.44  | 0 |
| S3_extracted_k141_27984        | 5648  | No | NA | 0  | 1  | Not-determined | Genome-fragment | NA    | 0 |
| S3_extracted_k141_67270        | 5219  | No | NA | 0  | 0  | Not-determined | Genome-fragment | NA    | 0 |
| S3_extracted_k141_11438        | 1241  | No | NA | 0  | 0  | Not-determined | Genome-fragment | NA    | 0 |
| S10_vs_93700  full             | 1599  | No | NA | 1  | 0  | Low-quality    | Genome-fragment | 3.4   | 0 |
| S8_vs_k141_24822  full         | 1599  | No | NA | 1  | 0  | Low-quality    | Genome-fragment | 3.78  | 0 |
| S3_extracted_k141_53607        | 1152  | No | NA | 0  | 0  | Not-determined | Genome-fragment | NA    | 0 |
| S3_extracted_k141_36385        | 1158  | No | NA | 0  | 1  | Not-determined | Genome-fragment | NA    | 0 |
| S3_extracted_k141_4067         | 6741  | No | NA | 0  | 11 | Not-determined | Genome-fragment | NA    | 0 |
| S17_extracted_k141_155514      | 1600  | No | NA | 0  | 0  | Low-quality    | Genome-fragment | 7.25  | 0 |
| S9_extracted_k141_164          | 1600  | No | NA | 0  | 0  | Low-quality    | Genome-fragment | 2.21  | 0 |
| S13_vs_98755  full             | 1600  | No | NA | 0  | 0  | Low-quality    | Genome-fragment | 3.98  | 0 |
| S3_extracted_k141_4082         | 1751  | No | NA | 0  | 1  | Not-determined | Genome-fragment | NA    | 0 |
| S14_extracted_k141_70951       | 1600  | No | NA | 0  | 0  | Low-quality    | Genome-fragment | 3.72  | 0 |
| S14_vs_k141_136091  full       | 1600  | No | NA | 0  | 2  | Low-quality    | Genome-fragment | 2.08  | 0 |
| S3_extracted_k141_11310        | 1749  | No | NA | 0  | 1  | Not-determined | Genome-fragment | NA    | 0 |
| S14_vs_k141_1042051  102genome | 1600  | No | NA | 0  | 0  | Low-quality    | Genome-fragment | 3.01  | 0 |
| S3_extracted_k141_60543        | 4225  | No | NA | 0  | 10 | Not-determined | Genome-fragment | NA    | 0 |
| S1_extracted_k141_96105        | 1600  | No | NA | 0  | 0  | Low-quality    | Genome-fragment | 1.72  | 0 |
| S3_extracted_k141_133210       | 3562  | No | NA | 0  | 0  | Not-determined | Genome-fragment | NA    | 0 |
| S3_extracted_k141_67333        | 56683 | No | NA | 14 | 0  | Complete       | High-quality    | 100   | 0 |
| S3_extracted_k141_60581        | 2060  | No | NA | 0  | 2  | Not-determined | Genome-fragment | NA    | 0 |
| S3_extracted_k141_99567        | 1116  | No | NA | 0  | 0  | Not-determined | Genome-fragment | NA    | 0 |
| S5_extracted_k141_11960        | 1600  | No | NA | 0  | 0  | Low-quality    | Genome-fragment | 1.02  | 0 |
| S3_extracted_k141_52709        | 1027  | No | NA | 0  | 0  | Not-determined | Genome-fragment | NA    | 0 |
| S3_extracted_k141_4138         | 1231  | No | NA | 0  | 1  | Not-determined | Genome-fragment | NA    | 0 |
| S10_vs_35501  full             | 1600  | No | NA | 0  | 0  | Low-quality    | Genome-fragment | 3.35  | 0 |
| S3_extracted_k141_44104        | 7909  | No | NA | 0  | 3  | Not-determined | Genome-fragment | NA    | 0 |
| S10_vs_72962  full             | 1600  | No | NA | 0  | 2  | Low-quality    | Genome-fragment | 2.76  | 0 |
| S10_vs_591301  102genome       | 1600  | No | NA | 0  | 0  | Low-quality    | Genome-fragment | 3.5   | 0 |
| S3_extracted_k141_36425        | 8709  | No | NA | 0  | 0  | Not-determined | Genome-fragment | NA    | 0 |
| S3_extracted_k141_13604        | 1120  | No | NA | 0  | 0  | Not-determined | Genome-fragment | NA    | 0 |
| S3_extracted_k141_132934       | 1211  | No | NA | 0  | 1  | Not-determined | Genome-fragment | NA    | 0 |
| S3_extracted_k141_60660        | 1566  | No | NA | 0  | 0  | Not-determined | Genome-fragment | NA    | 0 |
| S12_vs_k141_1780761  full      | 1600  | No | NA | 0  | 0  | Low-quality    | Genome-fragment | 3.89  | 0 |
| S3_extracted_k141_52767        | 1305  | No | NA | 0  | 0  | Not-determined | Genome-fragment | NA    | 0 |
| S12_vs_k141_1715711  full      | 1600  | No | NA | 0  | 0  | Low-quality    | Genome-fragment | 2.08  | 0 |
| S3_extracted_k141_76729        | 6698  | No | NA | 0  | 3  | Not-determined | Genome-fragment | NA    | 0 |
| S3_extracted_k141_52772        | 3804  | No | NA | 0  | 3  | Not-determined | Genome-fragment | NA    | 0 |
| S3_extracted_k141_13323        | 2582  | No | NA | 0  | 3  | Not-determined | Genome-fragment | NA    | 0 |
| S8_extracted_k141_63596        | 1600  | No | NA | 0  | 0  | Low-quality    | Genome-fragment | 1.14  | 0 |
| S3_extracted_k141_83839        | 1914  | No | NA | 0  | 6  | Not-determined | Genome-fragment | NA    | 0 |
| S3_extracted_k141_60682        | 1527  | No | NA | 0  | 0  | Not-determined | Genome-fragment | NA    | 0 |
| S9_vs_k141_112381  full        | 1601  | No | NA | 0  | 0  | Low-quality    | Genome-fragment | 4.02  | 0 |
| S3_extracted_k141_60692        | 4173  | No | NA | 0  | 1  | Not-determined | Genome-fragment | NA    | 0 |
| S3_extracted_k141_115815       | 1720  | No | NA | 0  | 1  | Not-determined | Genome-fragment | NA    | 0 |
| S3_extracted_k141_76762        | 7576  | No | NA | 0  | 3  | Not-determined | Genome-fragment | NA    | 0 |
| S13_vs_49911  full             | 1601  | No | NA | 0  | 0  | Low-quality    | Genome-fragment | 4.43  | 0 |
| S14_extracted_k141_44145       | 1881  | No | NA | 0  | 0  | Not-determined | Genome-fragment | NA    | 0 |
| S14_extracted_k141_9376        | 1601  | No | NA | 0  | 0  | Low-quality    | Genome-fragment | 3.55  | 0 |
| S3_extracted_k141_115861       | 2082  | No | NA | 0  | 2  | Not-determined | Genome-fragment | NA    | 0 |
| S3_extracted_k141_99626        | 39745 | No | NA | 21 | 0  | Complete       | High-quality    | 100   | 0 |
| S14_vs_k141_50121  full        | 1601  | No | NA | 0  | 0  | Low-quality    | Genome-fragment | 3.76  | 0 |
| S3_extracted_k141_67436        | 1697  | No | NA | 0  | 0  | Not-determined | Genome-fragment | NA    | 0 |
| S3_extracted_k141_13673        | 9090  | No | NA | 0  | 5  | Not-determined | Genome-fragment | NA    | 0 |
| S1_vs_k141_49044  full         | 1601  | No | NA | 1  | 0  | Low-quality    | Genome-fragment | 3.47  | 0 |
| S3_extracted_k141_113409       | 4145  | No | NA | 0  | 0  | Not-determined | Genome-fragment | NA    | 0 |
| S3_extracted_k141_64973        | 1601  | No | NA | 0  | 1  | Low-quality    | Genome-fragment | 1     | 0 |
| S3_extracted_k141_115869       | 3204  | No | NA | 0  | 3  | Not-determined | Genome-fragment | NA    | 0 |
| S3_vs_k141_1191931  full       | 1601  | No | NA | 0  | 0  | Low-quality    | Genome-fragment | 3.84  | 0 |
| S3_extracted_k141_28171        | 1540  | No | NA | 0  | 3  | Not-determined | Genome-fragment | NA    | 0 |
| S3_extracted_k141_115901       | 1650  | No | NA | 0  | 1  | Not-determined | Genome-fragment | NA    | 0 |
| S5_vs_k141_621861  102genome   | 1601  | No | NA | 0  | 0  | Low-quality    | Genome-fragment | 2.34  | 0 |
| S3_extracted_k141_36485        | 35347 | No | NA | 0  | 13 | Not-determined | Genome-fragment | NA    | 0 |
| S3_extracted_k141_83910        | 8049  | No | NA | 0  | 5  | Not-determined | Genome-fragment | NA    | 0 |
| S10_vs_32511  full             | 1601  | No | NA | 0  | 1  | Low-quality    | Genome-fragment | 2.2   | 0 |
| S12_vs_k141_170641  full       | 1601  | No | NA | 0  | 0  | Low-quality    | Genome-fragment | 2.88  | 0 |
| S8_extracted_k141_132078       | 1601  | No | NA | 0  | 0  | Low-quality    | Genome-fragment | 1     | 0 |
| S9_extracted_k141_6490         | 1602  | No | NA | 1  | 0  | Low-quality    | Genome-fragment | 1.86  | 0 |
| S3_extracted_k141_108049       | 1098  | No | NA | 0  | 1  | Not-determined | Genome-fragment | NA    | 0 |
| S13_vs_96119  full             | 1602  | No | NA | 1  | 0  | Low-quality    | Genome-fragment | 3.62  | 0 |
| S3_extracted_k141_67556        | 1334  | No | NA | 0  | 1  | Not-determined | Genome-fragment | NA    | 0 |
| S3_extracted_k141_36509        | 1626  | No | NA | 0  | 0  | Not-determined | Genome-fragment | NA    | 0 |
| S1_extracted_k141_47748        | 1602  | No | NA | 0  | 1  | Low-quality    | Genome-fragment | 0.89  | 0 |
| S3_extracted_k141_13804        | 1495  | No | NA | 0  | 1  | Not-determined | Genome-fragment | NA    | 0 |
| S3_extracted_k141_92033        | 4291  | No | NA | 0  | 1  | Not-determined | Genome-fragment | NA    | 0 |
| S3_extracted_k141_52947        | 7784  | No | NA | 0  | 0  | Not-determined | Genome-fragment | NA    | 0 |
| S3_extracted_k141_76896        | 3253  | No | NA | 0  | 2  | Not-determined | Genome-fragment | NA    | 0 |
| S3_extracted_k141_36558        | 5958  | No | NA | 0  | 5  | Not-determined | Genome-fragment | NA    | 0 |
| S3_extracted_k141_13827        | 2098  | No | NA | 0  | 0  | Not-determined | Genome-fragment | NA    | 0 |
| S1_extracted_k141_104905       | 1602  | No | NA | 0  | 0  | Low-quality    | Genome-fragment | 3.65  | 0 |
| S1_vs_k141_420421  full        | 1602  | No | NA | 0  | 0  | Low-quality    | Genome-fragment | 4     | 0 |
| S3_extracted_k141_42773        | 1292  | No | NA | 0  | 3  | Not-determined | Genome-fragment | NA    | 0 |
| S3_vs_k141_1114231  full       | 1602  | No | NA | 0  | 0  | Low-quality    | Genome-fragment | 4.13  | 0 |
| S16_vs_62611  full             | 1602  | No | NA | 0  | 0  | Low-quality    | Genome-fragment | 3.69  | 0 |
| S3_extracted_k141_36577        | 3234  | No | NA | 0  | 2  | Not-determined | Genome-fragment | NA    | 0 |
| S3_extracted_k141_19536        | 1049  | No | NA | 0  | 0  | Not-determined | Genome-fragment | NA    | 0 |
| S3_extracted_k141_108122       | 4204  | No | NA | 0  | 3  | Not-determined | Genome-fragment | NA    | 0 |
| S16_vs_53751  full             | 1602  | No | NA | 0  | 0  | Low-quality    | Genome-fragment | 2.93  | 0 |
| S3_extracted_k141_108127       | 1297  | No | NA | 0  | 0  | Not-determined | Genome-fragment | NA    | 0 |
| S3_extracted_k141_19544        | 3193  | No | NA | 0  | 1  | Not-determined | Genome-fragment | NA    | 0 |
| S10_extracted_27357            | 1602  | No | NA | 2  | 0  | Low-quality    | Genome-fragment | 2.08  | 0 |
| S3_extracted_k141_44397        | 4318  | No | NA | 1  | 1  | Not-determined | Genome-fragment | NA    | 0 |
| S3_extracted_k141_28306        | 1000  | No | NA | 0  | 0  | Not-determined | Genome-fragment | NA    | 0 |
| S12_extracted_k141_86737       | 1602  | No | NA | 0  | 0  | Low-quality    | Genome-fragment | 2.57  | 0 |
| S8_vs_k141_363731  full        | 1602  | No | NA | 0  | 1  | Low-quality    | Genome-fragment | 2.25  | 0 |
| S3_extracted_k141_28309        | 8674  | No | NA | 0  | 2  | Not-determined | Genome-fragment | NA    | 0 |
| S11_extracted_k141_98157       | 1603  | No | NA | 0  | 0  | Low-quality    | Genome-fragment | 3.5   | 0 |
| S3_extracted_k141_84066        | 1680  | No | NA | 0  | 0  | Not-determined | Genome-fragment | NA    | 0 |
| S3_extracted_k141_53053        | 3046  | No | NA | 0  | 1  | Not-determined | Genome-fragment | NA    | 0 |
| S11_vs_k141_747771  full       | 1603  | No | NA | 0  | 0  | Low-quality    | Genome-fragment | 2.08  | 0 |
| S14_vs_k141_841661  full       | 1603  | No | NA | 0  | 0  | Low-quality    | Genome-fragment | 1     | 0 |
| S3_extracted_k141_123575       | 4915  | No | NA | 0  | 3  | Not-determined | Genome-fragment | NA    | 0 |
| S3_extracted_k141_44405        | 38184 | No | NA | 26 | 0  | Medium-quality | Genome-fragment | 63.68 | 0 |
| S3_vs_k141_568341  full        | 1603  | No | NA | 1  | 0  | Low-quality    | Genome-fragment | 0.71  | 0 |
| S3_extracted_k141_19637        | 3081  | No | NA | 0  | 3  | Not-determined | Genome-fragment | NA    | 0 |
| S7_vs_848991  full             | 1603  | No | NA | 0  | 0  | Low-quality    | Genome-fragment | 3.65  | 0 |
| S3_extracted_k141_53108        | 3131  | No | NA | 0  | 1  | Not-determined | Genome-fragment | NA    | 0 |
| S7_vs_1098951  full            | 1603  | No | NA | 0  | 0  | Low-quality    | Genome-fragment | 2.99  | 0 |
| S3_extracted_k141_4359         | 2000  | No | NA | 0  | 0  | Not-determined | Genome-fragment | NA    | 0 |
| S16_vs_949721  full            | 1603  | No | NA | 0  | 0  | Low-quality    | Genome-fragment | 3.16  | 0 |
| S3_extracted_k141_77117        | 1603  | No | NA | 0  | 0  | Low-quality    | Genome-fragment | 1.65  | 0 |
| S3_extracted_k141_99732        | 33105 | No | NA | 7  | 0  | Not-determined | Genome-fragment | NA    | 0 |
| S17_extracted_k141_44673       | 1604  | No | NA | 0  | 1  | Low-quality    | Genome-fragment | 0.6   | 0 |
| S3_extracted_k141_84179        | 1056  | No | NA | 0  | 2  | Not-determined | Genome-fragment | NA    | 0 |
| S3_extracted_k141_14060        | 1066  | No | NA | 0  | 0  | Not-determined | Genome-fragment | NA    | 0 |
| S9_vs_k141_26801  full         | 1604  | No | NA | 2  | 0  | Low-quality    | Genome-fragment | 4.19  | 0 |
| S3_extracted_k141_92218        | 3182  | No | NA | 0  | 0  | Not-determined | Genome-fragment | NA    | 0 |
| S3_extracted_k141_77117        | 5315  | No | NA | 0  | 3  | Not-determined | Genome-fragment | NA    | 0 |
| S3_extracted_k141_99734        | 46304 | No | NA | 18 | 0  | High-quality   | High-quality    | 98.26 | 0 |
| S14_extracted_k141_39622       | 1604  | No | NA | 0  | 1  | Low-quality    | Genome-fragment | 0.85  | 0 |
| S3_extracted_k141_4406         | 1185  | No | NA | 0  | 1  | Not-determined | Genome-fragment | NA    | 0 |
| S3_extracted_k141_19734        | 2449  | No | NA | 0  | 2  | Not-determined | Genome-fragment | NA    | 0 |
| S3_extracted_k141_99750        | 3513  | No | NA | 0  | 3  | Not-determined | Genome-fragment | NA    | 0 |
| S3_extracted_k141_19767        | 1070  | No | NA | 0  | 1  | Not-determined | Genome-fragment | NA    | 0 |
| S3_extracted_k141_36583        | 2340  | No | NA | 0  | 1  | Not-determined | Genome-fragment | NA    | 0 |
| S3_extracted_k141_28419        | 1460  | No | NA | 0  | 1  | Not-determined | Genome-fragment | NA    | 0 |
| S3_extracted_k141_67772        | 3582  | No | NA | 0  | 2  | Not-determined | Genome-fragment | NA    | 0 |
| S3_extracted_k141_92336        | 1550  | No | NA | 0  | 0  | Not-determined | Genome-fragment | NA    | 0 |
| S3_extracted_k141_67786        | 3212  | No | NA | 0  | 2  | Not-determined | Genome-fragment | NA    | 0 |
| S3_vs_k141_662071  full        | 1604  | No | NA | 0  | 0  | Low-quality    | Genome-fragment | 1.2   | 0 |
| S3_extracted_k141_44445        | 1009  | No | NA | 0  | 0  | Not-determined | Genome-fragment | NA    | 0 |
| S3_extracted_k141_77224        | 2318  | No | NA | 0  | 0  | Not-determined | Genome-fragment | NA    | 0 |
| S3_extracted_k141_7722         |       |    |    |    |    |                |                 |       |   |



|                            |       |     |    |    |   |                |                 |    |       |      |
|----------------------------|-------|-----|----|----|---|----------------|-----------------|----|-------|------|
| S3_extracted_k141_116362   | 3952  | No  | NA | 0  | 2 | Not-determined | Genome-fragment | NA | 0     | 0    |
| S16_extracted_48641        | 1605  | No  | NA | 0  | 0 | Low-quality    | Genome-fragment | NA | 3.9   | 0    |
| S3_extracted_k141_77346    | 1081  | No  | NA | 0  | 0 | Not-determined | Genome-fragment | NA | 0     | 0    |
| S3_extracted_k141_14361    | 3307  | No  | NA | 0  | 0 | Not-determined | Genome-fragment | NA | 0     | 0    |
| S3_extracted_k141_99990    | 2015  | No  | NA | 0  | 1 | Not-determined | Genome-fragment | NA | 0     | 0    |
| S3_extracted_k141_77365    | 1944  | No  | NA | 0  | 1 | Not-determined | Genome-fragment | NA | 0     | 0    |
| S16_vs_k138721  full       | 1605  | No  | NA | 0  | 0 | Low-quality    | Genome-fragment | NA | 3.42  | 0    |
| S3_extracted_k141_44555    | 1662  | No  | NA | 0  | 0 | Not-determined | Genome-fragment | NA | 0     | 0    |
| S3_extracted_k141_12379    | 3312  | No  | NA | 0  | 1 | Not-determined | Genome-fragment | NA | 0     | 0    |
| S3_extracted_k141_67926    | 1368  | No  | NA | 0  | 0 | Not-determined | Genome-fragment | NA | 0     | 0    |
| S3_extracted_k141_123799   | 4080  | No  | NA | 0  | 1 | Not-determined | Genome-fragment | NA | 0     | 0    |
| S12_vs_k141_114960  full   | 1605  | No  | NA | 0  | 0 | Low-quality    | Genome-fragment | NA | 4.68  | 0    |
| S3_extracted_k141_116400   | 1278  | No  | NA | 0  | 1 | Not-determined | Genome-fragment | NA | 0     | 0    |
| S12_vs_k141_148410  full   | 1605  | No  | NA | 1  | 0 | Low-quality    | Genome-fragment | NA | 2.22  | 0    |
| S3_extracted_k141_108459   | 3113  | No  | NA | 0  | 2 | Not-determined | Genome-fragment | NA | 0     | 0    |
| S3_extracted_k141_113809   | 6021  | No  | NA | 0  | 2 | Not-determined | Genome-fragment | NA | 0     | 0    |
| S3_extracted_k141_84548    | 2310  | No  | NA | 0  | 3 | Not-determined | Genome-fragment | NA | 0     | 0    |
| S3_extracted_k141_4618     | 5458  | No  | NA | 0  | 4 | Not-determined | Genome-fragment | NA | 0     | 0    |
| S11_vs_k141_7972  full     | 1606  | No  | NA | 0  | 0 | Low-quality    | Genome-fragment | NA | 3.52  | 0    |
| S3_extracted_k141_116442   | 1005  | No  | NA | 0  | 2 | Not-determined | Genome-fragment | NA | 0     | 0    |
| S3_extracted_k141_116468   | 2687  | No  | NA | 0  | 3 | Not-determined | Genome-fragment | NA | 0     | 0    |
| S3_extracted_k141_67958    | 2369  | No  | NA | 0  | 0 | Not-determined | Genome-fragment | NA | 0     | 0    |
| S14_vs_k141_23148  full    | 1606  | No  | NA | 0  | 0 | Low-quality    | Genome-fragment | NA | 2.75  | 0    |
| S3_extracted_k141_20071    | 1119  | No  | NA | 0  | 0 | Not-determined | Genome-fragment | NA | 0     | 0    |
| S3_extracted_k141_28704    | 1670  | No  | NA | 0  | 2 | Not-determined | Genome-fragment | NA | 1.05  | 0    |
| S5_vs_k141_61352  full     | 1606  | No  | NA | 0  | 0 | Low-quality    | Genome-fragment | NA | 2.71  | 0    |
| S5_vs_k141_123926  102gene | 1606  | No  | NA | 1  | 0 | Low-quality    | Genome-fragment | NA | 1.07  | 0    |
| S7_vs_86435  full          | 1606  | No  | NA | 2  | 0 | Low-quality    | Genome-fragment | NA | 4.7   | 0    |
| S3_extracted_k141_14465    | 1010  | No  | NA | 0  | 0 | Not-determined | Genome-fragment | NA | 0     | 0    |
| S10_vs_115452  full        | 1606  | No  | NA | 2  | 0 | Low-quality    | Genome-fragment | NA | 2.69  | 0    |
| S3_extracted_k141_123878   | 1845  | No  | NA | 0  | 2 | Not-determined | Genome-fragment | NA | 0     | 0    |
| S3_extracted_k141_12388    | 2133  | No  | NA | 0  | 1 | Not-determined | Genome-fragment | NA | 0     | 0    |
| S3_extracted_k141_36932    | 1085  | No  | NA | 0  | 1 | Not-determined | Genome-fragment | NA | 0     | 0    |
| S12_vs_k141_80270  full    | 1606  | No  | NA | 0  | 1 | Low-quality    | Genome-fragment | NA | 0.76  | 0    |
| S3_extracted_k141_123890   | 1016  | No  | NA | 0  | 0 | Not-determined | Genome-fragment | NA | 0     | 0    |
| S12_vs_k141_148746  full   | 1606  | No  | NA | 0  | 0 | Low-quality    | Genome-fragment | NA | 2.43  | 0    |
| S6_vs_k141_17960  full     | 1606  | No  | NA | 0  | 0 | Low-quality    | Genome-fragment | NA | 3.53  | 0    |
| S8_vs_k141_7877  full      | 1606  | No  | NA | 0  | 1 | Low-quality    | Genome-fragment | NA | 1.3   | 0    |
| S3_extracted_k141_14489    | 3162  | No  | NA | 0  | 1 | Not-determined | Genome-fragment | NA | 0     | 0    |
| S3_extracted_k141_28722    | 1472  | No  | NA | 0  | 0 | Not-determined | Genome-fragment | NA | 0     | 0    |
| S8_vs_k141_165916  full    | 1606  | No  | NA | 0  | 1 | Low-quality    | Genome-fragment | NA | 1.92  | 0    |
| S17_extracted_k141_143228  | 1607  | No  | NA | 0  | 0 | Low-quality    | Genome-fragment | NA | 3.6   | 0    |
| S17_vs_k141_136591  full   | 1607  | No  | NA | 1  | 0 | Low-quality    | Genome-fragment | NA | 2.4   | 0    |
| S3_extracted_k141_61564    | 2115  | No  | NA | 0  | 3 | Not-determined | Genome-fragment | NA | 0     | 0    |
| S3_extracted_k141_108546   | 4668  | No  | NA | 0  | 3 | Not-determined | Genome-fragment | NA | 0     | 0    |
| S9_extracted_k141_11268    | 1607  | No  | NA | 0  | 0 | Low-quality    | Genome-fragment | NA | 3.87  | 0    |
| S11_vs_k141_2150  full     | 1607  | No  | NA | 0  | 1 | Low-quality    | Genome-fragment | NA | 1.35  | 0    |
| S3_extracted_k141_100080   | 3058  | No  | NA | 0  | 1 | Not-determined | Genome-fragment | NA | 0     | 0    |
| S3_extracted_k141_61590    | 2355  | No  | NA | 0  | 3 | Not-determined | Genome-fragment | NA | 0     | 0    |
| S3_extracted_k141_53501    | 1065  | No  | NA | 0  | 0 | Not-determined | Genome-fragment | NA | 0     | 0    |
| S13_vs_88503  full         | 1607  | No  | NA | 0  | 1 | Low-quality    | Genome-fragment | NA | 3.45  | 0    |
| S14_extracted_k141_45652   | 1607  | No  | NA | 0  | 0 | Low-quality    | Genome-fragment | NA | 5.21  | 0    |
| S14_vs_k141_4310  full     | 1607  | No  | NA | 2  | 0 | Low-quality    | Genome-fragment | NA | 3.79  | 0    |
| S3_extracted_k141_84832    | 12719 | No  | NA | 10 | 0 | Medium-quality | Genome-fragment | NA | 54.33 | 0    |
| S3_extracted_k141_68038    | 1000  | No  | NA | 0  | 1 | Not-determined | Genome-fragment | NA | 0     | 0    |
| S3_vs_k141_2782  full      | 1607  | No  | NA | 1  | 0 | Low-quality    | Genome-fragment | NA | 2.55  | 0    |
| S3_extracted_k141_92779    | 1927  | No  | NA | 0  | 0 | Not-determined | Genome-fragment | NA | 0     | 0    |
| S3_extracted_k141_124049   | 1502  | No  | NA | 0  | 0 | Not-determined | Genome-fragment | NA | 0     | 0    |
| S3_extracted_k141_108557   | 2014  | No  | NA | 0  | 2 | Not-determined | Genome-fragment | NA | 0     | 0    |
| S3_extracted_k141_108599   | 1166  | No  | NA | 0  | 0 | Not-determined | Genome-fragment | NA | 0     | 0    |
| S3_extracted_k141_68059    | 1383  | No  | NA | 0  | 1 | Not-determined | Genome-fragment | NA | 0     | 0    |
| S5_vs_k141_3735  full      | 1607  | No  | NA | 0  | 0 | Low-quality    | Genome-fragment | NA | 4.01  | 0    |
| S16_extracted_29992        | 1607  | No  | NA | 0  | 0 | Low-quality    | Genome-fragment | NA | 2.93  | 0    |
| S3_extracted_k141_124077   | 1032  | No  | NA | 0  | 1 | Not-determined | Genome-fragment | NA | 0     | 0    |
| S12_vs_k141_71075  full    | 1607  | No  | NA | 0  | 0 | Low-quality    | Genome-fragment | NA | 3.66  | 0    |
| S6_vs_k141_8216  full      | 1607  | No  | NA | 1  | 0 | Low-quality    | Genome-fragment | NA | 3.64  | 0    |
| S3_extracted_k141_84866    | 1181  | No  | NA | 0  | 1 | Not-determined | Genome-fragment | NA | 0     | 0    |
| S3_extracted_k141_14672    | 1142  | No  | NA | 0  | 1 | Not-determined | Genome-fragment | NA | 0     | 0    |
| S3_extracted_k141_90798    | 1146  | No  | NA | 0  | 1 | Not-determined | Genome-fragment | NA | 0     | 0    |
| S3_extracted_k141_108641   | 1611  | No  | NA | 0  | 1 | Not-determined | Genome-fragment | NA | 0     | 0    |
| S8_vs_k141_200146  full    | 1607  | No  | NA | 1  | 0 | Low-quality    | Genome-fragment | NA | 3.03  | 0    |
| S8_vs_k141_146133  full    | 1607  | No  | NA | 1  | 0 | Low-quality    | Genome-fragment | NA | 1.55  | 0    |
| S3_extracted_k141_108662   | 1105  | No  | NA | 0  | 1 | Not-determined | Genome-fragment | NA | 0     | 0    |
| S11_vs_k141_22434  full    | 1608  | No  | NA | 0  | 0 | Low-quality    | Genome-fragment | NA | 2.57  | 0    |
| S3_extracted_k141_92844    | 1615  | No  | NA | 0  | 1 | Not-determined | Genome-fragment | NA | 0     | 0    |
| S11_vs_k141_36954  full    | 1608  | No  | NA | 0  | 0 | Low-quality    | Genome-fragment | NA | 4.62  | 0    |
| S3_extracted_k141_68157    | 1295  | No  | NA | 0  | 0 | Not-determined | Genome-fragment | NA | 0     | 0    |
| S13_vs_141186  full        | 1608  | Yes | NA | 1  | 1 | Low-quality    | Genome-fragment | NA | 3.74  | 8.96 |
| S3_extracted_k141_4723     | 1050  | No  | NA | 0  | 0 | Not-determined | Genome-fragment | NA | 0     | 0    |
| S3_extracted_k141_68210    | 1243  | No  | NA | 0  | 0 | Not-determined | Genome-fragment | NA | 0     | 0    |
| S1_extracted_k141_48240    | 1608  | No  | NA | 1  | 0 | Low-quality    | Genome-fragment | NA | 3.66  | 0    |
| S3_extracted_k141_68220    | 1105  | No  | NA | 0  | 0 | Not-determined | Genome-fragment | NA | 0     | 0    |
| S1_extracted_k141_118586   | 1608  | No  | NA | 1  | 0 | Low-quality    | Genome-fragment | NA | 0.92  | 0    |
| S3_extracted_k141_92883    | 1160  | No  | NA | 0  | 3 | Not-determined | Genome-fragment | NA | 0     | 0    |
| S3_extracted_k141_141796   | 1344  | No  | NA | 0  | 2 | Not-determined | Genome-fragment | NA | 0     | 0    |
| S3_extracted_k141_4761     | 1088  | No  | NA | 0  | 1 | Not-determined | Genome-fragment | NA | 0     | 0    |
| S1_vs_k141_31294  full     | 1608  | No  | NA | 0  | 0 | Low-quality    | Genome-fragment | NA | 1.13  | 0    |
| S3_extracted_k141_61795    | 1217  | No  | NA | 0  | 0 | Not-determined | Genome-fragment | NA | 0     | 0    |
| S7_vs_47591  full          | 1608  | No  | NA | 0  | 1 | Low-quality    | Genome-fragment | NA | 1.06  | 0    |
| S3_extracted_k141_4783     | 1750  | No  | NA | 0  | 0 | Not-determined | Genome-fragment | NA | 0     | 0    |
| S16_vs_101328  full        | 1608  | No  | NA | 0  | 0 | Low-quality    | Genome-fragment | NA | 0.94  | 0    |
| S3_extracted_k141_1214184  | 1185  | No  | NA | 0  | 0 | Not-determined | Genome-fragment | NA | 0     | 0    |
| S3_extracted_k141_37218    | 7637  | No  | NA | 0  | 6 | Not-determined | Genome-fragment | NA | 0     | 0    |
| S3_extracted_k141_116704   | 1262  | No  | NA | 0  | 0 | Not-determined | Genome-fragment | NA | 0     | 0    |
| S10_vs_76332  full         | 1608  | No  | NA | 0  | 1 | Low-quality    | Genome-fragment | NA | 1.09  | 0    |
| S3_extracted_k141_108841   | 2315  | No  | NA | 0  | 2 | Not-determined | Genome-fragment | NA | 0     | 0    |
| S6_vs_k141_23047  full     | 1608  | No  | NA | 0  | 0 | Low-quality    | Genome-fragment | NA | 4.16  | 0    |
| S8_vs_k141_177854  full    | 1608  | No  | NA | 0  | 2 | Low-quality    | Genome-fragment | NA | 2.9   | 0    |
| S3_extracted_k141_14849    | 5705  | No  | NA | 0  | 1 | Not-determined | Genome-fragment | NA | 0     | 0    |
| S3_extracted_k141_85052    | 1561  | No  | NA | 0  | 1 | Not-determined | Genome-fragment | NA | 0     | 0    |
| S3_extracted_k141_37253    | 1298  | No  | NA | 0  | 0 | Not-determined | Genome-fragment | NA | 0     | 0    |
| S3_extracted_k141_77840    | 1489  | No  | NA | 0  | 0 | Not-determined | Genome-fragment | NA | 0     | 0    |
| S3_extracted_k141_108897   | 6123  | No  | NA | 0  | 3 | Not-determined | Genome-fragment | NA | 0     | 0    |
| S11_vs_k141_60283  full    | 1609  | No  | NA | 0  | 0 | Low-quality    | Genome-fragment | NA | 3.76  | 0    |
| S11_vs_k141_93141  full    | 1609  | No  | NA | 0  | 1 | Low-quality    | Genome-fragment | NA | 2.51  | 0    |
| S3_extracted_k141_61860    | 67881 | No  | NA | 27 | 0 | Complete       | High-quality    | NA | 100   | 0    |
| S3_extracted_k141_108936   | 1102  | No  | NA | 0  | 0 | Not-determined | Genome-fragment | NA | 0     | 0    |
| S3_extracted_k141_92980    | 3249  | No  | NA | 0  | 0 | Not-determined | Genome-fragment | NA | 0     | 0    |
| S3_extracted_k141_68317    | 1056  | No  | NA | 0  | 0 | Not-determined | Genome-fragment | NA | 0     | 0    |
| S11_vs_k141_79473  102gene | 1609  | No  | NA | 1  | 0 | Low-quality    | Genome-fragment | NA | 3.05  | 0    |
| S3_extracted_k141_28981    | 2818  | No  | NA | 0  | 3 | Not-determined | Genome-fragment | NA | 0     | 0    |
| S3_extracted_k141_85104    | 1085  | No  | NA | 0  | 1 | Not-determined | Genome-fragment | NA | 0     | 0    |
| S1_extracted_k141_2973     | 1609  | No  | NA | 0  | 0 | Low-quality    | Genome-fragment | NA | 2.77  | 0    |
| S3_extracted_k141_29008    | 4575  | No  | NA | 0  | 2 | Not-determined | Genome-fragment | NA | 0     | 0    |
| S3_extracted_k141_68360    | 1239  | No  | NA | 0  | 0 | Not-determined | Genome-fragment | NA | 0     | 0    |
| S1_vs_k141_85839  full     | 1609  | No  | NA | 0  | 0 | Low-quality    | Genome-fragment | NA | 4.44  | 0    |
| S3_extracted_k141_100440   | 31270 | No  | NA | 24 | 0 | Medium-quality | Genome-fragment | NA | 68.24 | 0    |
| S3_extracted_k141_37312    | 3304  | No  | NA | 0  | 3 | Not-determined | Genome-fragment | NA | 0     | 0    |
| S3_extracted_k141_5021     | 1514  | No  | NA | 0  | 0 | Not-determined | Genome-fragment | NA | 0     | 0    |
| S3_extracted_k141_108959   | 61482 | No  | NA | 26 | 1 | Complete       | High-quality    | NA | 100   | 0    |
| S3_extracted_k141_61941    | 1720  | No  | NA | 0  | 0 | Not-determined | Genome-fragment | NA | 0     | 0    |
| S3_extracted_k141_68398    | 1429  | No  | NA | 0  | 1 | Not-determined | Genome-fragment | NA | 0     | 0    |
| S3_extracted_k141_61959    | 4813  | No  | NA | 0  | 2 | Not-determined | Genome-fragment | NA | 0     | 0    |
| S3_extracted_k141_5042     | 2385  | No  | NA | 0  | 1 | Not-determined | Genome-fragment | NA | 0     | 0    |
| S3_extracted_k141_68417    | 1476  | No  | NA | 0  | 0 | Not-determined | Genome-fragment | NA | 0     | 0    |
| S3_vs_k141_12119  full     | 1609  | No  | NA | 0  | 1 | Low-quality    | Genome-fragment | NA | 1.54  | 0    |
| S7_vs_113013  full         | 1609  | No  | NA | 0  | 0 | Low-quality    | Genome-fragment | NA | 3.79  | 0    |
| S3_extracted_k141_68442    | 1051  | No  | NA | 0  | 0 | Not-determined | Genome-fragment | NA | 0     | 0    |
| S3_extracted_k141_5123     | 1000  | No  | NA | 0  | 0 | Not-determined | Genome-fragment | NA | 0     | 0    |
| S7_vs_126743  full         | 1609  | No  | NA | 0  | 0 | Low-quality    | Genome-fragment | NA | 1.35  | 0    |
| S7_vs_61046  102gene       | 1609  | No  | NA | 1  | 0 | Low-quality    | Genome-fragment | NA | 4.02  | 0    |
| S16_vs_112078  full        | 1609  | No  | NA | 2  | 0 | Low-quality    | Genome-fragment | NA | 4.07  | 0    |
| S3_extracted_k141_37410    | 1166  | No  | NA | 0  | 0 | Not-determined | Genome-fragment | NA | 0     | 0    |
| S16_vs_170711  full        | 1609  | Yes | NA | 1  | 1 | Low-quality    | Genome-fragment | NA | 0.5   | 80.8 |
| S3_extracted_k141_109090   | 1043  | No  | NA | 0  | 2 | Not-determined | Genome-fragment | NA | 0     | 0    |
| S10_extracted_42331        | 1609  | No  | NA |    |   |                |                 |    |       |      |



|                            |       |     |     |    |   |                |                 |    |       |      |
|----------------------------|-------|-----|-----|----|---|----------------|-----------------|----|-------|------|
| S3_extracted_k141_109474   | 1158  | No  | NA  | 0  | 1 | Not-determined | Genome-fragment | NA |       | 0    |
| S1_vs_k141_125111[ ]H2gene | 1612  | No  | NA  | 0  | 0 | Low-quality    | Genome-fragment | NA | 3.73  | 0    |
| S3_extracted_k141_15338    | 1102  | No  | NA  | 0  | 1 | Not-determined | Genome-fragment | NA |       | 0    |
| S5_extracted_k141_20127    | 1612  | No  | NA  | 1  | 0 | Low-quality    | Genome-fragment | NA | 0.85  | 0    |
| S7_vs_112992[ ]full        | 1612  | No  | NA  | 1  | 0 | Low-quality    | Genome-fragment | NA | 3.83  | 0    |
| S10_extracted_121376       | 1612  | No  | NA  | 0  | 0 | Low-quality    | Genome-fragment | NA | 2.8   | 0    |
| S4_extracted_15002         | 1612  | No  | NA  | 0  | 0 | Low-quality    | Genome-fragment | NA | 2.89  | 0    |
| S3_extracted_k141_29410    | 2097  | No  | NA  | 0  | 2 | Not-determined | Genome-fragment | NA |       | 0    |
| S5_vs_k141_19739[ ]full    | 1613  | No  | NA  | 0  | 0 | Low-quality    | Genome-fragment | NA | 0.98  | 0    |
| S11_vs_k141_29327[ ]full   | 1613  | No  | NA  | 1  | 0 | Low-quality    | Genome-fragment | NA | 2.96  | 0    |
| S3_extracted_k141_78265    | 14179 | No  | NA  | 0  | 2 | Not-determined | Genome-fragment | NA |       | 0    |
| S3_extracted_k141_12459    | 1486  | No  | NA  | 0  | 1 | Not-determined | Genome-fragment | NA |       | 0    |
| S3_extracted_k141_78281    | 1241  | No  | NA  | 0  | 2 | Not-determined | Genome-fragment | NA |       | 0    |
| S1_vs_k141_146884[ ]full   | 1613  | No  | NA  | 0  | 0 | Low-quality    | Genome-fragment | NA | 3.81  | 0    |
| S3_extracted_k141_78288    | 3002  | No  | NA  | 0  | 4 | Not-determined | Genome-fragment | NA |       | 0    |
| S3_extracted_k141_117315   | 1519  | No  | NA  | 0  | 1 | Not-determined | Genome-fragment | NA |       | 0    |
| S3_extracted_k141_29480    | 2188  | No  | NA  | 0  | 3 | Not-determined | Genome-fragment | NA |       | 0    |
| S3_extracted_k141_45352    | 1835  | No  | NA  | 0  | 1 | Not-determined | Genome-fragment | NA |       | 0    |
| S2_extracted_k141_15383    | 1232  | No  | NA  | 0  | 0 | Not-determined | Genome-fragment | NA |       | 0    |
| S3_extracted_k141_93406    | 2767  | No  | NA  | 0  | 0 | Not-determined | Genome-fragment | NA |       | 0    |
| S3_extracted_k141_32594    | 1613  | No  | NA  | 0  | 1 | Low-quality    | Genome-fragment | NA | 0.45  | 0    |
| S3_extracted_k141_109593   | 1159  | No  | NA  | 0  | 0 | Not-determined | Genome-fragment | NA |       | 0    |
| S3_extracted_k141_38467    | 1613  | No  | NA  | 0  | 1 | Low-quality    | Genome-fragment | NA | 3.71  | 0    |
| S5_extracted_k141_67368    | 1613  | No  | NA  | 0  | 0 | Low-quality    | Genome-fragment | NA | 2.88  | 0    |
| S3_extracted_k141_109607   | 1062  | No  | NA  | 0  | 0 | Not-determined | Genome-fragment | NA |       | 0    |
| S3_extracted_k141_29514    | 7426  | No  | NA  | 0  | 3 | Not-determined | Genome-fragment | NA |       | 0    |
| S3_extracted_k141_29531    | 3323  | No  | NA  | 0  | 0 | Not-determined | Genome-fragment | NA |       | 0    |
| S7_extracted_13765         | 1613  | No  | NA  | 1  | 0 | Low-quality    | Genome-fragment | NA | 6     | 0    |
| S3_extracted_k141_5525     | 40068 | No  | NA  | 16 | 0 | High-quality   | High-quality    |    | 90.61 | 0    |
| NC1_vf_k141_2670           | 1613  | No  | NA  | 0  | 1 | Low-quality    | Genome-fragment | NA | 2     | 0    |
| S12_vs_k141_24782[ ]full   | 1613  | No  | NA  | 0  | 0 | Low-quality    | Genome-fragment | NA | 3.4   | 0    |
| S3_extracted_k141_54181    | 254   | No  | NA  | 0  | 0 | Not-determined | Genome-fragment | NA |       | 0    |
| S3_extracted_k141_29581    | 1189  | No  | NA  | 0  | 1 | Not-determined | Genome-fragment | NA |       | 0    |
| S3_extracted_k141_117190   | 1126  | No  | NA  | 0  | 0 | Not-determined | Genome-fragment | NA |       | 0    |
| S3_extracted_k141_5369     | 1040  | No  | NA  | 0  | 1 | Not-determined | Genome-fragment | NA |       | 0    |
| S9_extracted_k141_58524    | 1614  | No  | NA  | 0  | 0 | Low-quality    | Genome-fragment | NA | 4.07  | 0    |
| S11_vs_k141_78333[ ]full   | 1614  | No  | NA  | 2  | 0 | Low-quality    | Genome-fragment | NA | 4.22  | 0    |
| S3_extracted_k141_45497    | 1392  | No  | NA  | 0  | 2 | Not-determined | Genome-fragment | NA |       | 0    |
| S3_extracted_k141_45506    | 1008  | No  | NA  | 1  | 1 | Not-determined | Genome-fragment | NA |       | 0    |
| S5_vs_k141_11307[ ]full    | 1614  | Yes | 510 | 1  | 1 | Low-quality    | Genome-fragment | NA | 0.37  | 68.4 |
| S3_extracted_k141_45540    | 1156  | No  | NA  | 0  | 0 | Not-determined | Genome-fragment | NA | 4.3   | 0    |
| S12_vs_k141_37836[ ]H2gene | 1614  | No  | NA  | 0  | 1 | Low-quality    | Genome-fragment | NA | 2.7   | 0    |
| S3_extracted_k141_117272   | 1012  | No  | NA  | 0  | 0 | Not-determined | Genome-fragment | NA |       | 0    |
| S3_extracted_k141_16045    | 1615  | No  | NA  | 0  | 0 | Low-quality    | Genome-fragment | NA | 2.5   | 0    |
| S3_extracted_k141_93558    | 1367  | No  | NA  | 0  | 1 | Not-determined | Genome-fragment | NA |       | 0    |
| S5_vs_k141_67831[ ]full    | 1615  | No  | NA  | 0  | 0 | Low-quality    | Genome-fragment | NA | 3.7   | 0    |
| S3_extracted_k141_15477    | 1058  | No  | NA  | 0  | 2 | Not-determined | Genome-fragment | NA |       | 0    |
| S3_extracted_k141_5641     | 1107  | No  | NA  | 0  | 2 | Not-determined | Genome-fragment | NA |       | 0    |
| S3_extracted_k141_5642     | 1051  | No  | NA  | 0  | 1 | Not-determined | Genome-fragment | NA |       | 0    |
| S3_extracted_k141_62507    | 1922  | No  | NA  | 0  | 2 | Not-determined | Genome-fragment | NA |       | 0    |
| S3_extracted_k141_5659     | 1016  | No  | NA  | 0  | 0 | Not-determined | Genome-fragment | NA |       | 0    |
| S7_extracted_11242         | 1615  | No  | NA  | 0  | 0 | Low-quality    | Genome-fragment | NA | 2.41  | 0    |
| S7_vs_67596[ ]full         | 1615  | No  | NA  | 2  | 2 | Low-quality    | Genome-fragment | NA | 2.74  | 0    |
| S7_vs_121348[ ]full        | 1615  | No  | NA  | 0  | 0 | Low-quality    | Genome-fragment | NA | 3.88  | 0    |
| S3_extracted_k141_15591    | 3038  | No  | NA  | 0  | 2 | Not-determined | Genome-fragment | NA |       | 0    |
| S3_extracted_k141_85834    | 1809  | No  | NA  | 0  | 0 | Not-determined | Genome-fragment | NA |       | 0    |
| S16_extracted_79515        | 1615  | No  | NA  | 1  | 0 | Low-quality    | Genome-fragment | NA | 2.8   | 0    |
| S3_extracted_k141_21002    | 1157  | No  | NA  | 0  | 2 | Not-determined | Genome-fragment | NA |       | 0    |
| S3_extracted_k141_124825   | 1754  | No  | NA  | 0  | 0 | Not-determined | Genome-fragment | NA | 2.74  | 0    |
| S3_extracted_k141_69003    | 3368  | No  | NA  | 0  | 1 | Not-determined | Genome-fragment | NA |       | 0    |
| S3_extracted_k141_85852    | 10278 | No  | NA  | 0  | 4 | Not-determined | Genome-fragment | NA |       | 0    |
| S3_extracted_k141_29796    | 1029  | No  | NA  | 0  | 1 | Not-determined | Genome-fragment | NA |       | 0    |
| S3_extracted_k141_78594    | 4145  | No  | NA  | 0  | 3 | Not-determined | Genome-fragment | NA |       | 0    |
| S3_extracted_k141_45761    | 3286  | No  | NA  | 0  | 2 | Not-determined | Genome-fragment | NA |       | 0    |
| S3_extracted_k141_124956   | 1052  | No  | NA  | 0  | 0 | Not-determined | Genome-fragment | NA |       | 0    |
| S16_extracted_126847       | 1615  | No  | NA  | 1  | 0 | Low-quality    | Genome-fragment | NA | 2.6   | 0    |
| S3_extracted_k141_21140    | 1659  | No  | NA  | 0  | 2 | Not-determined | Genome-fragment | NA |       | 0    |
| S3_extracted_k141_100917   | 1111  | No  | NA  | 0  | 1 | Not-determined | Genome-fragment | NA |       | 0    |
| S10_extracted_76079        | 1615  | No  | NA  | 0  | 1 | Low-quality    | Genome-fragment | NA | 2.6   | 0    |
| S3_extracted_k141_54353    | 57601 | No  | NA  | 14 | 0 | High-quality   | High-quality    |    | 99.5  | 0    |
| S3_extracted_k141_45807    | 1920  | No  | NA  | 0  | 3 | Not-determined | Genome-fragment | NA |       | 0    |
| S3_extracted_k141_15721    | 1615  | No  | NA  | 0  | 0 | Not-determined | Genome-fragment | NA |       | 0    |
| S3_extracted_k141_117375   | 1854  | No  | NA  | 0  | 0 | Not-determined | Genome-fragment | NA |       | 0    |
| S3_extracted_k141_109833   | 5846  | No  | NA  | 0  | 5 | Not-determined | Genome-fragment | NA |       | 0    |
| S4_extracted_10417         | 1615  | No  | NA  | 0  | 0 | Low-quality    | Genome-fragment | NA | 5.33  | 0    |
| S8_extracted_k141_170307   | 1615  | No  | NA  | 0  | 1 | Low-quality    | Genome-fragment | NA | 1.07  | 0    |
| S8_vs_k141_186215[ ]full   | 1615  | No  | NA  | 0  | 1 | Low-quality    | Genome-fragment | NA | 1.88  | 0    |
| S3_extracted_k141_21221    | 1038  | No  | NA  | 0  | 1 | Not-determined | Genome-fragment | NA |       | 0    |
| S3_extracted_k141_117389   | 3109  | No  | NA  | 0  | 0 | Not-determined | Genome-fragment | NA |       | 0    |
| S3_extracted_k141_45909    | 2226  | No  | NA  | 0  | 0 | Not-determined | Genome-fragment | NA |       | 0    |
| S3_extracted_k141_15791    | 1423  | No  | NA  | 0  | 2 | Not-determined | Genome-fragment | NA |       | 0    |
| S3_extracted_k141_69051    | 2579  | No  | NA  | 0  | 1 | Not-determined | Genome-fragment | NA |       | 0    |
| S3_extracted_k141_93912    | 1712  | No  | NA  | 0  | 2 | Not-determined | Genome-fragment | NA |       | 0    |
| S3_extracted_k141_54498    | 5405  | No  | NA  | 2  | 0 | High-quality   | High-quality    |    | 93.06 | 0    |
| S11_vs_k141_87940[ ]full   | 1616  | No  | NA  | 2  | 1 | Low-quality    | Genome-fragment | NA | 2.74  | 0    |
| S7_vs_87048[ ]H2gene       | 1616  | No  | NA  | 1  | 0 | Low-quality    | Genome-fragment | NA | 1.12  | 0    |
| S3_extracted_k141_29950    | 1015  | No  | NA  | 0  | 0 | Not-determined | Genome-fragment | NA |       | 0    |
| S3_extracted_k141_54554    | 1135  | No  | NA  | 0  | 0 | Not-determined | Genome-fragment | NA |       | 0    |
| S16_extracted_46384        | 1616  | No  | NA  | 0  | 1 | Low-quality    | Genome-fragment | NA | 3.61  | 0    |
| S16_vs_122887[ ]full       | 1616  | No  | NA  | 0  | 0 | Low-quality    | Genome-fragment | NA | 1.02  | 0    |
| S4_extracted_1473          | 1616  | No  | NA  | 4  | 0 | Low-quality    | Genome-fragment | NA | 5.33  | 0    |
| S3_extracted_k141_78779    | 2224  | No  | NA  | 1  | 1 | Not-determined | Genome-fragment | NA |       | 0    |
| S6_vs_k141_3203[ ]full     | 1616  | No  | NA  | 0  | 1 | Low-quality    | Genome-fragment | NA | 2.74  | 0    |
| S3_extracted_k141_125076   | 1801  | No  | NA  | 0  | 0 | Not-determined | Genome-fragment | NA |       | 0    |
| S3_extracted_k141_69104    | 1731  | No  | NA  | 0  | 1 | Not-determined | Genome-fragment | NA |       | 0    |
| S11_vs_k141_102076[ ]full  | 1617  | No  | NA  | 1  | 0 | Low-quality    | Genome-fragment | NA | 4.02  | 0    |
| S3_extracted_k141_78835    | 3533  | No  | NA  | 0  | 3 | Not-determined | Genome-fragment | NA |       | 0    |
| S5_extracted_k141_16198    | 1617  | No  | NA  | 0  | 0 | Low-quality    | Genome-fragment | NA | 2.7   | 0    |
| S3_extracted_k141_86319    | 1166  | No  | NA  | 0  | 0 | Not-determined | Genome-fragment | NA |       | 0    |
| S3_extracted_k141_5872     | 3290  | No  | NA  | 0  | 1 | Not-determined | Genome-fragment | NA |       | 0    |
| S5_vs_k141_115581[ ]full   | 1617  | No  | NA  | 0  | 2 | Low-quality    | Genome-fragment | NA | 2.77  | 0    |
| S3_extracted_k141_78845    | 2319  | No  | NA  | 0  | 0 | Not-determined | Genome-fragment | NA |       | 0    |
| S5_vs_k141_131726[ ]full   | 1617  | No  | NA  | 0  | 2 | Low-quality    | Genome-fragment | NA | 1.86  | 0    |
| S3_extracted_k141_110042   | 9816  | No  | NA  | 0  | 6 | Not-determined | Genome-fragment | NA |       | 0    |
| S3_extracted_k141_110071   | 1387  | No  | NA  | 0  | 1 | Not-determined | Genome-fragment | NA |       | 0    |
| S3_extracted_k141_110094   | 1973  | No  | NA  | 0  | 1 | Not-determined | Genome-fragment | NA |       | 0    |
| S3_extracted_k141_62907    | 1115  | No  | NA  | 0  | 0 | Not-determined | Genome-fragment | NA |       | 0    |
| S7_vs_45206[ ]full         | 1617  | No  | NA  | 0  | 1 | Low-quality    | Genome-fragment | NA | 0.57  | 0    |
| S3_extracted_k141_46155    | 2718  | No  | NA  | 0  | 1 | Not-determined | Genome-fragment | NA |       | 0    |
| S3_extracted_k141_78891    | 3217  | No  | NA  | 0  | 1 | Not-determined | Genome-fragment | NA |       | 0    |
| S10_vs_1903[ ]H2gene       | 1617  | No  | NA  | 2  | 0 | Low-quality    | Genome-fragment | NA |       | 0    |
| S3_extracted_k141_69162    | 4947  | No  | NA  | 0  | 1 | Not-determined | Genome-fragment | NA |       | 0    |
| S6_vs_k141_7116[ ]full     | 1617  | No  | NA  | 0  | 0 | Low-quality    | Genome-fragment | NA | 4.06  | 0    |
| S13_vs_121968[ ]full       | 1618  | No  | NA  | 0  | 0 | Low-quality    | Genome-fragment | NA | 0.71  | 0    |
| S3_extracted_k141_20206    | 1655  | No  | NA  | 0  | 1 | Not-determined | Genome-fragment | NA |       | 0    |
| S3_extracted_k141_46218    | 3112  | No  | NA  | 0  | 2 | Not-determined | Genome-fragment | NA |       | 0    |
| S3_extracted_k141_38234    | 1587  | No  | NA  | 0  | 1 | Not-determined | Genome-fragment | NA |       | 0    |
| S14_extracted_k141_110058  | 1618  | No  | NA  | 0  | 0 | Low-quality    | Genome-fragment | NA | 3.98  | 0    |
| S3_extracted_k141_78953    | 1170  | No  | NA  | 0  | 0 | Not-determined | Genome-fragment | NA |       | 0    |
| S3_extracted_k141_54726    | 8662  | No  | NA  | 0  | 4 | Not-determined | Genome-fragment | NA |       | 0    |
| S14_extracted_k141_57862   | 1618  | No  | NA  | 6  | 0 | Low-quality    | Genome-fragment | NA | 5.34  | 0    |
| S1_vs_k141_74319[ ]full    | 1618  | No  | NA  | 0  | 0 | Low-quality    | Genome-fragment | NA | 4.06  | 0    |
| S3_extracted_k141_46263    | 1374  | No  | NA  | 0  | 0 | Not-determined | Genome-fragment | NA |       | 0    |
| S3_vs_k141_10496[ ]full    | 1618  | No  | NA  | 3  | 0 | Low-quality    | Genome-fragment | NA | 4.27  | 0    |
| S16_extracted_86998        | 1618  | No  | NA  | 0  | 1 | Low-quality    | Genome-fragment | NA | 2.14  | 0    |
| S6_vs_k141_16727[ ]full    | 1618  | No  | NA  | 2  | 0 | Low-quality    | Genome-fragment | NA | 4.54  | 0    |
| S13_extracted_121042       | 1619  | No  | NA  | 0  | 0 | Low-quality    | Genome-fragment | NA | 3.2   | 0    |
| S3_extracted_k141_69216    | 1140  | No  | NA  | 0  | 0 | Not-determined | Genome-fragment | NA |       | 0    |
| S14_vs_k141_101570[ ]full  | 1619  | No  | NA  | 0  | 0 | Low-quality    | Genome-fragment | NA | 1.14  | 0    |
| S3_extracted_k141_38348    | 2757  | No  | NA  | 0  | 2 | Not-determined | Genome-fragment | NA |       | 0    |
| S1_vs_k141_2028[ ]full     | 1619  | No  | NA  | 0  | 0 | Low-quality    | Genome-fragment | NA | 1.27  | 0    |
| S3_extracted_k141_112731   | 1619  | No  | NA  | 2  | 2 | Low-quality    | Genome-fragment | NA | 0.6   | 0    |
| S3_extracted_k141_63125    | 1157  | No  | NA  | 0  | 1 | Not-determined | Genome-fragment | NA |       | 0    |
| S3_extracted_k141_94239    | 5601  | No  | NA  | 0  | 7 | Not-determined | Genome-fragment | NA |       | 0    |
| S3_extracted_k141_54849    | 5339  | No  | NA  | 0  | 4 | Not-determined | Genome-fragment | NA |       | 0    |
| S3_vs_k141_80974[ ]full    | 1619  | No  | NA  | 1  | 0 | Low-quality    | Genome-fragment | NA | 1.74  | 0    |
| S3_extracted_k141_125357   | 1101  | No  | NA  | 0  | 1 | Not-determined | Genome-fragment | NA |       | 0    |
| S5_extracted_k141_7560     | 16    |     |     |    |   |                |                 |    |       |      |



|                            |       |     |     |    |   |                |                 |    |       |       |
|----------------------------|-------|-----|-----|----|---|----------------|-----------------|----|-------|-------|
| S3_extracted_k141_21772    | 2228  | No  | NA  | 0  | 0 | Not-determined | Genome-fragment | NA | 1.47  | 0     |
| S17_vs_k141_29096[full]    | 1621  | No  | NA  | 0  | 0 | Low-quality    | Genome-fragment | NA | 0     | 0     |
| S3_extracted_k141_125574   | 1337  | No  | NA  | 0  | 0 | Not-determined | Genome-fragment | NA | 0     | 0     |
| S17_vs_k141_82360[full]    | 1621  | No  | NA  | 0  | 1 | Low-quality    | Genome-fragment | NA | 2.24  | 0     |
| S3_extracted_k141_55082    | 1950  | No  | NA  | 0  | 0 | Not-determined | Genome-fragment | NA | 0     | 0     |
| S17_vs_k141_97928[full]    | 1621  | No  | NA  | 0  | 0 | Low-quality    | Genome-fragment | NA | 1.34  | 0     |
| S3_extracted_k141_69462    | 1077  | No  | NA  | 0  | 0 | Not-determined | Genome-fragment | NA | 0     | 0     |
| S3_extracted_k141_125587   | 2002  | No  | NA  | 0  | 0 | Not-determined | Genome-fragment | NA | 0     | 0     |
| S3_extracted_k141_86820    | 1040  | No  | NA  | 0  | 0 | Not-determined | Genome-fragment | NA | 0     | 0     |
| S11_extracted_k141_58038   | 1621  | No  | NA  | 0  | 0 | Low-quality    | Genome-fragment | NA | 1.31  | 0     |
| S3_extracted_k141_125609   | 3882  | No  | NA  | 0  | 2 | Not-determined | Genome-fragment | NA | 0     | 0     |
| S3_extracted_k141_86846    | 1059  | No  | NA  | 0  | 0 | Not-determined | Genome-fragment | NA | 0     | 0     |
| S3_extracted_k141_30516    | 2939  | No  | NA  | 0  | 2 | Not-determined | Genome-fragment | NA | 0     | 0     |
| S3_extracted_k141_118140   | 1317  | No  | NA  | 0  | 0 | Not-determined | Genome-fragment | NA | 0     | 0     |
| S11_vs_k141_33094[fl2]gene | 1621  | No  | NA  | 1  | 0 | Low-quality    | Genome-fragment | NA | 2.81  | 0     |
| S3_extracted_k141_94424    | 1371  | No  | NA  | 0  | 0 | Not-determined | Genome-fragment | NA | 0     | 0     |
| S3_extracted_k141_86857    | 5642  | No  | NA  | 0  | 1 | Not-determined | Genome-fragment | NA | 0     | 0     |
| S3_extracted_k141_79096    | 4328  | No  | NA  | 0  | 4 | Not-determined | Genome-fragment | NA | 0     | 0     |
| S3_extracted_k141_79104    | 1042  | No  | NA  | 0  | 1 | Not-determined | Genome-fragment | NA | 0     | 0     |
| S3_vs_k141_119029[full]    | 1621  | No  | NA  | 1  | 0 | Low-quality    | Genome-fragment | NA | 2.96  | 0     |
| S3_extracted_k141_21509    | 1338  | No  | NA  | 0  | 0 | Not-determined | Genome-fragment | NA | 0     | 0     |
| S5_extracted_k141_137052   | 1621  | No  | NA  | 0  | 0 | Low-quality    | Genome-fragment | NA | 1.73  | 0     |
| S5_vs_k141_117378[full]    | 1621  | No  | NA  | 0  | 0 | Low-quality    | Genome-fragment | NA | 3.58  | 0     |
| S3_extracted_k141_21931    | 1086  | No  | NA  | 0  | 0 | Not-determined | Genome-fragment | NA | 0     | 0     |
| S5_vs_k141_111704[full]    | 1621  | No  | NA  | 0  | 1 | Low-quality    | Genome-fragment | NA | 2.98  | 0     |
| S3_extracted_k141_21949    | 1570  | No  | NA  | 0  | 0 | Not-determined | Genome-fragment | NA | 0     | 0     |
| S3_extracted_k141_30592    | 1353  | No  | NA  | 0  | 2 | Not-determined | Genome-fragment | NA | 0     | 0     |
| S5_vs_k141_77080[full]     | 1621  | No  | NA  | 1  | 0 | Low-quality    | Genome-fragment | NA | 3.03  | 0     |
| S3_extracted_k141_22038    | 1266  | No  | NA  | 0  | 0 | Not-determined | Genome-fragment | NA | 0     | 0     |
| S3_extracted_k141_6510     | 1067  | No  | NA  | 0  | 0 | Not-determined | Genome-fragment | NA | 0     | 0     |
| S7_vs_k141_114917[full]    | 1621  | No  | NA  | 2  | 0 | Low-quality    | Genome-fragment | NA | 4.12  | 0     |
| S3_extracted_k141_94518    | 1009  | No  | NA  | 0  | 0 | Not-determined | Genome-fragment | NA | 0     | 0     |
| S16_vs_146532[full]        | 1621  | Yes | 489 | 1  | 1 | Low-quality    | Genome-fragment | NA | 2.97  | 69.83 |
| S11_extracted_k141_121438  | 1622  | No  | NA  | 1  | 0 | Low-quality    | Genome-fragment | NA | 3.13  | 0     |
| S3_extracted_k141_6513     | 3571  | No  | NA  | 0  | 2 | Not-determined | Genome-fragment | NA | 0     | 0     |
| S3_extracted_k141_101591   | 4782  | No  | NA  | 0  | 0 | Medium-quality | Genome-fragment | NA | 84.94 | 0     |
| S3_vs_k141_120316[full]    | 1622  | No  | NA  | 0  | 0 | Low-quality    | Genome-fragment | NA | 3.96  | 0     |
| S3_extracted_k141_63459    | 3733  | No  | NA  | 0  | 1 | Not-determined | Genome-fragment | NA | 2.46  | 0     |
| S3_vs_k141_1518[full]      | 1622  | No  | NA  | 0  | 0 | Low-quality    | Genome-fragment | NA | 2.94  | 0     |
| S3_extracted_k141_6536     | 3271  | No  | NA  | 0  | 3 | Not-determined | Genome-fragment | NA | 0     | 0     |
| S3_extracted_k141_125734   | 1036  | No  | NA  | 0  | 2 | Not-determined | Genome-fragment | NA | 0     | 0     |
| S5_vs_k141_80023[full]     | 1623  | No  | NA  | 0  | 0 | Low-quality    | Genome-fragment | NA | 2.32  | 0     |
| S3_extracted_k141_110664   | 4383  | No  | NA  | 0  | 2 | Not-determined | Genome-fragment | NA | 0     | 0     |
| S3_extracted_k141_22087    | 1426  | No  | NA  | 0  | 1 | Not-determined | Genome-fragment | NA | 0     | 0     |
| S5_vs_k141_107438[full]    | 1623  | No  | NA  | 1  | 0 | Low-quality    | Genome-fragment | NA | 3.71  | 0     |
| S3_extracted_k141_101597   | 1036  | No  | NA  | 0  | 0 | Not-determined | Genome-fragment | NA | 2.8   | 0     |
| S16_vs_169934[full]        | 1623  | No  | NA  | 2  | 0 | Low-quality    | Genome-fragment | NA | 2.8   | 0     |
| S10_extracted_19900        | 1623  | No  | NA  | 1  | 0 | Low-quality    | Genome-fragment | NA | 2.46  | 0     |
| S12_vs_k141_144247[full]   | 1623  | Yes | 954 | 0  | 1 | Low-quality    | Genome-fragment | NA | 2.16  | 41.22 |
| S3_extracted_k141_94585    | 5039  | No  | NA  | 0  | 3 | Not-determined | Genome-fragment | NA | 0     | 0     |
| S6_extracted_k141_31420    | 1623  | No  | NA  | 0  | 0 | Low-quality    | Genome-fragment | NA | 1.02  | 0     |
| S8_extracted_k141_9837     | 1623  | No  | NA  | 0  | 1 | Low-quality    | Genome-fragment | NA | 4.88  | 0     |
| S3_extracted_k141_118320   | 1386  | No  | NA  | 0  | 0 | Not-determined | Genome-fragment | NA | 0     | 0     |
| S8_vs_k141_61681[full]     | 1623  | No  | NA  | 0  | 1 | Low-quality    | Genome-fragment | NA | 1.6   | 0     |
| S3_extracted_k141_118322   | 3128  | No  | NA  | 0  | 2 | Not-determined | Genome-fragment | NA | 0     | 0     |
| S11_extracted_k141_69111   | 1624  | No  | NA  | 0  | 0 | Low-quality    | Genome-fragment | NA | 1.94  | 0     |
| S3_extracted_k141_22158    | 1224  | No  | NA  | 0  | 1 | Not-determined | Genome-fragment | NA | 0     | 0     |
| S3_extracted_k141_101611   | 40986 | No  | NA  | 24 | 3 | Medium-quality | Genome-fragment | NA | 73.47 | 0     |
| S3_extracted_k141_22166    | 1221  | No  | NA  | 0  | 0 | Not-determined | Genome-fragment | NA | 0     | 0     |
| S3_extracted_k141_79418    | 1040  | No  | NA  | 0  | 0 | Not-determined | Genome-fragment | NA | 0     | 0     |
| S3_extracted_k141_87113    | 1062  | No  | NA  | 0  | 1 | Not-determined | Genome-fragment | NA | 0     | 0     |
| S3_extracted_k141_94650    | 1476  | No  | NA  | 0  | 2 | Not-determined | Genome-fragment | NA | 0     | 0     |
| S14_vs_k141_73280[full]    | 1624  | No  | NA  | 0  | 0 | Low-quality    | Genome-fragment | NA | 4.07  | 0     |
| S3_vs_k141_37332[full]     | 1624  | No  | NA  | 0  | 0 | Low-quality    | Genome-fragment | NA | 3.02  | 0     |
| S3_extracted_k141_94659    | 3925  | No  | NA  | 0  | 0 | Not-determined | Genome-fragment | NA | 0     | 0     |
| S7_vs_96808[full]          | 1624  | No  | NA  | 0  | 0 | Low-quality    | Genome-fragment | NA | 5.19  | 0     |
| S3_extracted_k141_87133    | 4199  | No  | NA  | 0  | 2 | Not-determined | Genome-fragment | NA | 0     | 0     |
| S3_extracted_k141_94665    | 1205  | No  | NA  | 0  | 2 | Not-determined | Genome-fragment | NA | 0     | 0     |
| S3_extracted_k141_46787    | 1416  | No  | NA  | 0  | 0 | Not-determined | Genome-fragment | NA | 0     | 0     |
| S3_extracted_k141_55262    | 5684  | No  | NA  | 0  | 1 | Not-determined | Genome-fragment | NA | 0     | 0     |
| S16_extracted_153022       | 1624  | No  | NA  | 1  | 0 | Low-quality    | Genome-fragment | NA | 4.08  | 0     |
| S3_extracted_k141_94721    | 1096  | No  | NA  | 0  | 0 | Not-determined | Genome-fragment | NA | 0     | 0     |
| S3_extracted_k141_6609     | 1048  | No  | NA  | 0  | 0 | Not-determined | Genome-fragment | NA | 0     | 0     |
| S12_vs_k141_90939[full]    | 1624  | No  | NA  | 0  | 0 | Low-quality    | Genome-fragment | NA | 3.84  | 0     |
| S8_extracted_k141_113417   | 1624  | No  | NA  | 0  | 0 | Low-quality    | Genome-fragment | NA | 3.35  | 0     |
| S8_vs_k141_189191[full]    | 1624  | No  | NA  | 0  | 1 | Low-quality    | Genome-fragment | NA | 2.26  | 0     |
| S17_vs_k141_135717[full]   | 1625  | No  | NA  | 0  | 0 | Low-quality    | Genome-fragment | NA | 3.49  | 0     |
| S3_extracted_k141_46863    | 1621  | No  | NA  | 0  | 1 | Not-determined | Genome-fragment | NA | 0     | 0     |
| S3_extracted_k141_94791    | 5466  | No  | NA  | 0  | 0 | Not-determined | Genome-fragment | NA | 0     | 0     |
| S3_extracted_k141_38899    | 1036  | No  | NA  | 0  | 0 | Not-determined | Genome-fragment | NA | 0     | 0     |
| S11_vs_k141_36386[full]    | 1625  | No  | NA  | 2  | 0 | Low-quality    | Genome-fragment | NA | 3.77  | 0     |
| S3_extracted_k141_81238    | 1625  | No  | NA  | 0  | 0 | Low-quality    | Genome-fragment | NA | 3.24  | 0     |
| S16_vs_71631[full]         | 1625  | No  | NA  | 2  | 0 | Low-quality    | Genome-fragment | NA | 0.94  | 0     |
| S3_extracted_k141_125868   | 3401  | No  | NA  | 0  | 1 | Not-determined | Genome-fragment | NA | 0     | 0     |
| S3_extracted_k141_1138417  | 1422  | No  | NA  | 0  | 0 | Not-determined | Genome-fragment | NA | 0     | 0     |
| S8_extracted_k141_175243   | 1625  | No  | NA  | 0  | 0 | Low-quality    | Genome-fragment | NA | 2.18  | 0     |
| S17_extracted_k141_89237   | 1626  | No  | NA  | 0  | 1 | Low-quality    | Genome-fragment | NA | 4.15  | 0     |
| S3_extracted_k141_69921    | 3347  | No  | NA  | 0  | 2 | Not-determined | Genome-fragment | NA | 0     | 0     |
| S17_extracted_k141_169550  | 1626  | No  | NA  | 0  | 0 | Low-quality    | Genome-fragment | NA | 2.42  | 0     |
| S3_extracted_k141_118442   | 3637  | No  | NA  | 0  | 1 | Not-determined | Genome-fragment | NA | 0     | 0     |
| S3_extracted_k141_94858    | 4201  | No  | NA  | 0  | 2 | Not-determined | Genome-fragment | NA | 0     | 0     |
| S3_extracted_k141_94861    | 1694  | No  | NA  | 0  | 0 | Not-determined | Genome-fragment | NA | 0     | 0     |
| S3_extracted_k141_101821   | 1759  | No  | NA  | 0  | 1 | Not-determined | Genome-fragment | NA | 0     | 0     |
| S3_extracted_k141_125932   | 2579  | No  | NA  | 0  | 2 | Not-determined | Genome-fragment | NA | 0     | 0     |
| S17_vs_k141_115048[full]   | 1626  | No  | NA  | 0  | 0 | Low-quality    | Genome-fragment | NA | 2.91  | 0     |
| S3_extracted_k141_63743    | 1445  | No  | NA  | 0  | 1 | Not-determined | Genome-fragment | NA | 0     | 0     |
| S14_vs_k141_6363[full]     | 1626  | No  | NA  | 0  | 2 | Low-quality    | Genome-fragment | NA | 1.41  | 0     |
| S3_extracted_k141_55394    | 1095  | No  | NA  | 0  | 0 | Not-determined | Genome-fragment | NA | 0     | 0     |
| S3_extracted_k141_101853   | 1214  | No  | NA  | 0  | 0 | Not-determined | Genome-fragment | NA | 0     | 0     |
| S3_extracted_k141_125956   | 2891  | No  | NA  | 0  | 2 | Not-determined | Genome-fragment | NA | 0     | 0     |
| S3_extracted_k141_55410    | 1322  | No  | NA  | 0  | 1 | Not-determined | Genome-fragment | NA | 0     | 0     |
| S3_extracted_k141_88473    | 1626  | No  | NA  | 0  | 0 | Low-quality    | Genome-fragment | NA | 1.24  | 0     |
| S3_extracted_k141_6775     | 2236  | No  | NA  | 0  | 1 | Not-determined | Genome-fragment | NA | 0     | 0     |
| S3_extracted_k141_6780     | 6559  | No  | NA  | 0  | 6 | Not-determined | Genome-fragment | NA | 0     | 0     |
| S3_extracted_k141_70005    | 1096  | No  | NA  | 0  | 1 | Not-determined | Genome-fragment | NA | 0     | 0     |
| S3_extracted_k141_125983   | 1444  | No  | NA  | 0  | 1 | Not-determined | Genome-fragment | NA | 0     | 0     |
| S3_vs_k141_4719[full]      | 1626  | No  | NA  | 0  | 0 | Low-quality    | Genome-fragment | NA | 1.79  | 0     |
| S3_extracted_k141_55454    | 5054  | No  | NA  | 0  | 4 | Not-determined | Genome-fragment | NA | 0     | 0     |
| S3_extracted_k141_94977    | 1760  | No  | NA  | 0  | 1 | Not-determined | Genome-fragment | NA | 0     | 0     |
| S5_vs_k141_122530[full]    | 1626  | No  | NA  | 1  | 0 | Low-quality    | Genome-fragment | NA | 3.61  | 0     |
| S3_extracted_k141_47053    | 1636  | No  | NA  | 0  | 0 | Not-determined | Genome-fragment | NA | 0     | 0     |
| S3_extracted_k141_94997    | 4342  | No  | NA  | 0  | 0 | Not-determined | Genome-fragment | NA | 0     | 0     |
| S3_extracted_k141_70054    | 1289  | No  | NA  | 0  | 1 | Not-determined | Genome-fragment | NA | 0     | 0     |
| S3_extracted_k141_126040   | 3295  | No  | NA  | 0  | 1 | Not-determined | Genome-fragment | NA | 0     | 0     |
| S5_vs_k141_112305[full]    | 1626  | No  | NA  | 0  | 0 | Low-quality    | Genome-fragment | NA | 3.28  | 0     |
| S3_extracted_k141_101896   | 3636  | No  | NA  | 0  | 4 | Not-determined | Genome-fragment | NA | 0     | 0     |
| S7_extracted_86547         | 1626  | No  | NA  | 0  | 1 | Low-quality    | Genome-fragment | NA | 0.66  | 0     |
| S3_extracted_k141_118599   | 1374  | No  | NA  | 0  | 1 | Not-determined | Genome-fragment | NA | 0     | 0     |
| S3_extracted_k141_118603   | 1025  | No  | NA  | 0  | 0 | Not-determined | Genome-fragment | NA | 0     | 0     |
| S3_extracted_k141_126087   | 1294  | No  | NA  | 0  | 1 | Not-determined | Genome-fragment | NA | 0     | 0     |
| S3_extracted_k141_95036    | 3224  | No  | NA  | 0  | 2 | Not-determined | Genome-fragment | NA | 0     | 0     |
| S10_vs_35215[full]         | 1626  | No  | NA  | 0  | 1 | Low-quality    | Genome-fragment | NA | 1.31  | 0     |
| S3_extracted_k141_39144    | 1000  | No  | NA  | 0  | 2 | Not-determined | Genome-fragment | NA | 0     | 0     |
| S3_extracted_k141_30972    | 1376  | No  | NA  | 0  | 1 | Not-determined | Genome-fragment | NA | 0     | 0     |
| S8_vs_k141_69319[full]     | 1626  | No  | NA  | 0  | 1 | Low-quality    | Genome-fragment | NA | 3.59  | 0     |
| S3_extracted_k141_39181    | 1019  | No  | NA  | 0  | 2 | Not-determined | Genome-fragment | NA | 0     | 0     |
| S9_extracted_k141_23769    | 1627  | No  | NA  | 1  | 0 | Low-quality    | Genome-fragment | NA | 27.31 | 0     |
| S3_extracted_k141_30187    | 2067  | No  | NA  | 0  | 0 | Not-determined | Genome-fragment | NA | 0     | 0     |
| S3_extracted_k141_87351    | 3439  | No  | NA  | 0  | 1 | Not-determined | Genome-fragment | NA | 0     | 0     |
| S3_extracted_k141_87357    | 1041  | No  | NA  | 0  | 0 | Not-determined | Genome-fragment | NA | 0     | 0     |
| S3_extracted_k141_30193    | 1180  | No  | NA  | 0  | 0 | Not-determined | Genome-fragment | NA | 0     | 0     |
| S3_extracted_k141_118695   | 1115  | No  | NA  | 0  | 1 | Not-determined | Genome-fragment | NA | 0     | 0     |
| S3_extracted_k141_118710   | 3034  | No  | NA  | 0  | 2 | Not-determined | Genome-fragment | NA | 0     | 0     |
| S3_extracted_k141_47186    | 2832  | No  | NA  | 0  | 0 | Not-determined | Genome-fragment | NA | 0     | 0     |
| S14_vs_k141_54938[full]    | 1627  | No  | NA  | 1  | 0 | Low-quality    | Genome-fragment | NA | 5.28  | 0     |
| S3_extracted_k141_11121    |       |     |     |    |   |                |                 |    |       |       |



|                              |        |     |    |    |    |                |                 |    |       |       |
|------------------------------|--------|-----|----|----|----|----------------|-----------------|----|-------|-------|
| S3_extracted_k141_102115     | 4402   | No  | NA | 0  | 4  | Not-determined | Genome-fragment | NA | 0     | 0     |
| S13_extracted_119578         | 1628   | No  | NA | 1  | 0  | Low-quality    | Genome-fragment | NA | 3.34  | 0     |
| S3_extracted_k141_111441     | 3230   | No  | NA | 0  | 2  | Not-determined | Genome-fragment | NA | 0     | 0     |
| S3_extracted_k141_111442     | 1387   | No  | NA | 0  | 1  | Not-determined | Genome-fragment | NA | 0     | 0     |
| S3_extracted_k141_70368      | 2217   | No  | NA | 0  | 1  | Not-determined | Genome-fragment | NA | 0     | 0     |
| S3_extracted_k141_102131     | 6558   | No  | NA | 0  | 3  | Not-determined | Genome-fragment | NA | 0     | 0     |
| S3_extracted_k141_39433      | 1005   | No  | NA | 0  | 1  | Not-determined | Genome-fragment | NA | 0     | 0     |
| S13_vs_28456[full]           | 1628   | No  | NA | 0  | 0  | Low-quality    | Genome-fragment | NA | 1.99  | 0     |
| S3_extracted_k141_47512      | 2140   | No  | NA | 0  | 2  | Not-determined | Genome-fragment | NA | 0     | 0     |
| S3_extracted_k141_31388      | 4643   | No  | NA | 0  | 2  | Not-determined | Genome-fragment | NA | 0     | 0     |
| S3_extracted_k141_95329      | 5302   | No  | NA | 0  | 1  | Not-determined | Genome-fragment | NA | 0     | 0     |
| S13_vs_127733[full]          | 1628   | No  | NA | 0  | 1  | Low-quality    | Genome-fragment | NA | 1.74  | 0     |
| S3_extracted_k141_118896     | 2108   | No  | NA | 0  | 1  | Not-determined | Genome-fragment | NA | 0     | 0     |
| S3_extracted_k141_7054       | 1535   | No  | NA | 0  | 0  | Not-determined | Genome-fragment | NA | 0     | 0     |
| S3_extracted_k141_7057       | 1176   | No  | NA | 0  | 0  | Not-determined | Genome-fragment | NA | 0     | 0     |
| S3_extracted_k141_47576      | 1107   | No  | NA | 0  | 1  | Not-determined | Genome-fragment | NA | 0     | 0     |
| S1_vs_k141_101712[full]      | 1628   | No  | NA | 1  | 0  | Low-quality    | Genome-fragment | NA | 2.86  | 0     |
| S3_extracted_k141_126560     | 1320   | No  | NA | 0  | 2  | Not-determined | Genome-fragment | NA | 2.46  | 0     |
| S3_extracted_k141_47587      | 1161   | No  | NA | 0  | 2  | Not-determined | Genome-fragment | NA | 2.73  | 0     |
| S1_vs_k141_106246[full]      | 1628   | No  | NA | 0  | 0  | Low-quality    | Genome-fragment | NA | 0     | 0     |
| S3_extracted_k141_22784      | 1270   | No  | NA | 0  | 0  | Not-determined | Genome-fragment | NA | 0     | 0     |
| S3_extracted_k141_102245     | 2070   | No  | NA | 0  | 2  | Not-determined | Genome-fragment | NA | 0     | 0     |
| S3_extracted_k141_111579     | 1576   | No  | NA | 0  | 1  | Not-determined | Genome-fragment | NA | 0     | 0     |
| S3_extracted_k141_47625      | 5116   | No  | NA | 0  | 4  | Not-determined | Genome-fragment | NA | 0     | 0     |
| S3_extracted_k141_39644      | 1313   | No  | NA | 0  | 1  | Not-determined | Genome-fragment | NA | 0     | 0     |
| S3_extracted_k141_7107       | 2883   | No  | NA | 0  | 0  | Not-determined | Genome-fragment | NA | 0     | 0     |
| S3_extracted_k141_126624     | 1042   | No  | NA | 0  | 0  | Not-determined | Genome-fragment | NA | 0     | 0     |
| S5_vs_k141_7438[full]        | 1628   | No  | NA | 0  | 0  | Low-quality    | Genome-fragment | NA | 2.22  | 0     |
| S10_vs_107355[full]          | 1628   | No  | NA | 0  | 0  | Low-quality    | Genome-fragment | NA | 4.86  | 0     |
| S3_extracted_k141_47709      | 1013   | No  | NA | 0  | 0  | Not-determined | Genome-fragment | NA | 0     | 0     |
| S3_extracted_k141_39713      | 1007   | No  | NA | 0  | 2  | Not-determined | Genome-fragment | NA | 0     | 0     |
| S3_extracted_k141_21874      | 1083   | No  | NA | 0  | 2  | Not-determined | Genome-fragment | NA | 0     | 0     |
| S3_extracted_k141_7137       | 15928  | No  | NA | 5  | 0  | Medium-quality | Genome-fragment | NA | 53.02 | 0     |
| S3_extracted_k141_7145       | 1343   | No  | NA | 0  | 1  | Not-determined | Genome-fragment | NA | 0     | 0     |
| S3_extracted_k141_39750      | 1066   | No  | NA | 0  | 2  | Not-determined | Genome-fragment | NA | 0     | 0     |
| S3_extracted_k141_31551      | 2042   | No  | NA | 0  | 2  | Not-determined | Genome-fragment | NA | 0     | 0     |
| S3_extracted_k141_21968      | 3167   | No  | NA | 2  | 0  | Medium-quality | Genome-fragment | NA | 52.91 | 0     |
| S3_extracted_k141_47796      | 3227   | No  | NA | 0  | 3  | Not-determined | Genome-fragment | NA | 3.14  | 0     |
| S12_vs_k141_63970[full]      | 1628   | No  | NA | 0  | 1  | Low-quality    | Genome-fragment | NA | 3.82  | 0     |
| S8_extracted_k141_8262       | 1628   | No  | NA | 0  | 2  | Low-quality    | Genome-fragment | NA | 2.98  | 0     |
| S11_extracted_k141_27146     | 1629   | No  | NA | 0  | 3  | Low-quality    | Genome-fragment | NA | 1.02  | 0     |
| S1_extracted_k141_23266      | 1629   | No  | NA | 0  | 1  | Low-quality    | Genome-fragment | NA | 0     | 0     |
| S3_extracted_k141_23036      | 1005   | No  | NA | 0  | 1  | Not-determined | Genome-fragment | NA | 62.67 | 0     |
| S3_extracted_k141_23042      | 19014  | No  | NA | 31 | 0  | Medium-quality | Genome-fragment | NA | 1.2   | 0     |
| S1_vs_k141_5586[full]        | 1629   | No  | NA | 0  | 4  | Low-quality    | Genome-fragment | NA | 3.51  | 0     |
| S3_extracted_k141_11486      | 1629   | No  | NA | 0  | 1  | Low-quality    | Genome-fragment | NA | 0     | 0     |
| S5_vs_k141_98190[full]       | 1629   | No  | NA | 0  | 0  | Low-quality    | Genome-fragment | NA | 4.83  | 0     |
| S3_extracted_k141_23080      | 5718   | No  | NA | 0  | 2  | Not-determined | Genome-fragment | NA | 0     | 0     |
| S3_vs_k141_65103[full]       | 1629   | No  | NA | 0  | 0  | Low-quality    | Genome-fragment | NA | 0     | 0     |
| S3_extracted_k141_7337       | 1120   | No  | NA | 0  | 1  | Not-determined | Genome-fragment | NA | 0     | 0     |
| S3_extracted_k141_31684      | 3127   | No  | NA | 0  | 1  | Not-determined | Genome-fragment | NA | 0     | 0     |
| S2_extracted_k141_22095      | 1380   | No  | NA | 0  | 0  | Not-determined | Genome-fragment | NA | 0     | 0     |
| S3_extracted_k141_7355       | 9233   | No  | NA | 0  | 2  | Not-determined | Genome-fragment | NA | 0     | 0     |
| S3_extracted_k141_95598      | 1112   | No  | NA | 0  | 1  | Not-determined | Genome-fragment | NA | 0     | 0     |
| S12_vs_k141_181245[full]     | 1629   | No  | NA | 0  | 2  | Low-quality    | Genome-fragment | NA | 2.89  | 0     |
| S3_extracted_k141_102514     | 3006   | No  | NA | 0  | 2  | Not-determined | Genome-fragment | NA | 81.81 | 0     |
| S3_extracted_k141_70746      | 30924  | No  | NA | 19 | 0  | Medium-quality | Genome-fragment | NA | 0     | 0     |
| S3_extracted_k141_7466       | 1511   | No  | NA | 0  | 1  | Not-determined | Genome-fragment | NA | 3.64  | 0     |
| S3_extracted_k141_102589     | 3710   | No  | NA | 0  | 2  | Not-determined | Genome-fragment | NA | 2.23  | 0     |
| S8_extracted_k141_100834     | 1629   | No  | NA | 0  | 1  | Low-quality    | Genome-fragment | NA | 0     | 0     |
| S17_vs_k141_140792[full]     | 1630   | No  | NA | 0  | 2  | Low-quality    | Genome-fragment | NA | 2.2   | 0     |
| S3_extracted_k141_7511       | 1630   | No  | NA | 1  | 0  | Not-determined | Genome-fragment | NA | 0     | 0     |
| S14_vs_k141_11900[full]      | 1630   | No  | NA | 1  | 0  | Low-quality    | Genome-fragment | NA | 0     | 0     |
| S3_extracted_k141_126815     | 1131   | No  | NA | 0  | 1  | Not-determined | Genome-fragment | NA | 0     | 0     |
| S3_extracted_k141_70921      | 2214   | No  | NA | 0  | 1  | Not-determined | Genome-fragment | NA | 0     | 0     |
| S3_extracted_k141_136877     | 1000   | No  | NA | 0  | 0  | Not-determined | Genome-fragment | NA | 0     | 0     |
| S3_extracted_k141_126881     | 1032   | No  | NA | 0  | 2  | Not-determined | Genome-fragment | NA | 2.14  | 0     |
| S5_vs_k141_102902[full]      | 1630   | No  | NA | 0  | 0  | Low-quality    | Genome-fragment | NA | 4     | 0     |
| S3_extracted_k141_12288      | 1328   | No  | NA | 1  | 0  | Not-determined | Genome-fragment | NA | 2.27  | 0     |
| S7_vs_59065[full]            | 1630   | No  | NA | 1  | 0  | Low-quality    | Genome-fragment | NA | 0     | 0     |
| S10_vs_42214[full]           | 1630   | No  | NA | 0  | 0  | Low-quality    | Genome-fragment | NA | 0     | 0     |
| S3_extracted_k141_70983      | 1230   | No  | NA | 0  | 0  | Not-determined | Genome-fragment | NA | 0     | 0     |
| S3_extracted_k141_102783     | 1308   | No  | NA | 0  | 2  | Not-determined | Genome-fragment | NA | 0     | 0     |
| S3_extracted_k141_23351      | 3052   | No  | NA | 0  | 0  | Not-determined | Genome-fragment | NA | 4.3   | 0     |
| S17_vs_k141_78212[full]      | 1631   | No  | NA | 0  | 1  | Low-quality    | Genome-fragment | NA | 0     | 0     |
| S3_extracted_k141_7721       | 1035   | No  | NA | 0  | 2  | Not-determined | Genome-fragment | NA | 0     | 0     |
| S3_extracted_k141_7728       | 1094   | No  | NA | 0  | 4  | Not-determined | Genome-fragment | NA | 0     | 0     |
| S11_extracted_k141_30551     | 1631   | No  | NA | 0  | 0  | Low-quality    | Genome-fragment | NA | 3.79  | 0     |
| S3_vs_k141_1431[full]        | 1631   | No  | NA | 0  | 0  | Low-quality    | Genome-fragment | NA | 2.71  | 0     |
| S3_extracted_k141_7773       | 6855   | No  | NA | 0  | 1  | Not-determined | Genome-fragment | NA | 0     | 0     |
| S3_extracted_k141_119246     | 1465   | No  | NA | 0  | 0  | Not-determined | Genome-fragment | NA | 0     | 0     |
| S3_extracted_k141_127051     | 2818   | No  | NA | 0  | 2  | Not-determined | Genome-fragment | NA | 0     | 0     |
| S3_extracted_k141_71183      | 3802   | No  | NA | 0  | 4  | Not-determined | Genome-fragment | NA | 0     | 0     |
| S3_extracted_k141_23513      | 1225   | No  | NA | 0  | 0  | Not-determined | Genome-fragment | NA | 0     | 0     |
| S3_extracted_k141_127059     | 1568   | No  | NA | 0  | 2  | Not-determined | Genome-fragment | NA | 0.4   | 0     |
| S5_extracted_k141_18485      | 1631   | No  | NA | 0  | 2  | Low-quality    | Genome-fragment | NA | 1.87  | 0     |
| S3_extracted_k141_127132     | 3128   | No  | NA | 0  | 1  | Not-determined | Genome-fragment | NA | 0.61  | 0     |
| S16_extracted_81717          | 1631   | No  | NA | 0  | 0  | Low-quality    | Genome-fragment | NA | 100   | 0     |
| S8_vs_k141_105228[full]      | 1631   | No  | NA | 1  | 0  | Low-quality    | Genome-fragment | NA | 4.19  | 0     |
| S3_extracted_k141_127168     | 13910  | No  | NA | 7  | 0  | Complete       | High-quality    | NA | 0     | 0     |
| S3_extracted_k141_115419     | 1929   | No  | NA | 0  | 0  | Not-determined | Genome-fragment | NA | 0     | 0     |
| S5_vs_k141_80185[full]       | 1632   | No  | NA | 0  | 0  | Low-quality    | Genome-fragment | NA | 0     | 0     |
| S3_extracted_k141_119441     | 3095   | No  | NA | 0  | 0  | Not-determined | Genome-fragment | NA | 0     | 0     |
| S3_extracted_k141_103057     | 2799   | No  | NA | 0  | 1  | Not-determined | Genome-fragment | NA | 0     | 0     |
| S3_extracted_k141_71407      | 1350   | No  | NA | 0  | 1  | Not-determined | Genome-fragment | NA | 0     | 0     |
| S3_extracted_k141_71410      | 1365   | No  | NA | 0  | 4  | Not-determined | Genome-fragment | NA | 0     | 0     |
| S3_extracted_k141_127233     | 1401   | No  | NA | 0  | 0  | Not-determined | Genome-fragment | NA | 0     | 0     |
| S3_extracted_k141_23705      | 3889   | No  | NA | 0  | 1  | Not-determined | Genome-fragment | NA | 0     | 0     |
| S3_extracted_k141_127272     | 5804   | No  | NA | 0  | 4  | Not-determined | Genome-fragment | NA | 0     | 0     |
| S3_extracted_k141_71491      | 2150   | No  | NA | 0  | 1  | Not-determined | Genome-fragment | NA | 0     | 0     |
| S3_extracted_k141_127309     | 2855   | No  | NA | 0  | 1  | Not-determined | Genome-fragment | NA | 1.08  | 0     |
| S14_vs_k141_45002[full]      | 1632   | No  | NA | 0  | 1  | Low-quality    | Genome-fragment | NA | 0     | 0     |
| S3_extracted_k141_103231     | 1011   | No  | NA | 0  | 1  | Not-determined | Genome-fragment | NA | 0     | 0     |
| S3_extracted_k141_23828      | 3997   | No  | NA | 0  | 3  | Not-determined | Genome-fragment | NA | 0.65  | 0     |
| S14_vs_k141_13664[full]      | 1632   | No  | NA | 1  | 0  | Low-quality    | Genome-fragment | NA | 100   | 0     |
| S3_extracted_k141_127392     | 54915  | No  | NA | 25 | 1  | Complete       | High-quality    | NA | 0     | 0     |
| S3_extracted_k141_103431     | 3141   | No  | NA | 0  | 1  | Not-determined | Genome-fragment | NA | 19.17 | 0     |
| S3_extracted_k141_64144      | 1632   | No  | NA | 0  | 0  | Low-quality    | Genome-fragment | NA | 0     | 0     |
| S3_extracted_k141_103451     | 1318   | No  | NA | 0  | 1  | Not-determined | Genome-fragment | NA | 0     | 0     |
| S3_extracted_k141_127399     | 97442  | No  | NA | 15 | 3  | Complete       | High-quality    | NA | 100   | 0     |
| S3_extracted_k141_127400     | 42799  | No  | NA | 19 | 0  | Complete       | High-quality    | NA | 2.95  | 0     |
| S7_extracted_27207           | 1632   | No  | NA | 0  | 0  | Not-determined | Genome-fragment | NA | 1.05  | 0     |
| S3_extracted_k141_103554     | 1818   | No  | NA | 1  | 0  | Not-determined | Genome-fragment | NA | 0     | 0     |
| S10_vs_104517[full]          | 1632   | No  | NA | 1  | 0  | Low-quality    | Genome-fragment | NA | 0     | 0     |
| S2_extracted_k141_127405     | 39265  | No  | NA | 19 | 1  | Complete       | High-quality    | NA | 0     | 0     |
| S11_vs_k141_31401[full]2gene | 1633   | No  | NA | 0  | 0  | Low-quality    | Genome-fragment | NA | 4.29  | 0     |
| S3_extracted_k141_127406     | 78572  | No  | NA | 14 | 1  | Complete       | High-quality    | NA | 100   | 0     |
| S3_extracted_k141_127408     | 29543  | No  | NA | 10 | 0  | Complete       | High-quality    | NA | 100   | 0     |
| S3_extracted_k141_127409     | 44970  | No  | NA | 12 | 1  | Complete       | High-quality    | NA | 100   | 0     |
| S5_vs_k141_56286[full]       | 1633   | No  | NA | 1  | 0  | Low-quality    | Genome-fragment | NA | 3.44  | 0     |
| S3_extracted_k141_127423     | 48451  | No  | NA | 14 | 1  | Complete       | High-quality    | NA | 100   | 0     |
| S3_extracted_k141_127426     | 3462   | No  | NA | 4  | 0  | Medium-quality | Genome-fragment | NA | 67.36 | 0     |
| S3_extracted_k141_127427     | 2474   | No  | NA | 0  | 0  | Not-determined | Genome-fragment | NA | 0     | 0     |
| S3_extracted_k141_127431     | 5479   | No  | NA | 0  | 0  | Complete       | High-quality    | NA | 0     | 0     |
| S2_extracted_k141_127447     | 101130 | No  | NA | 23 | 0  | Complete       | High-quality    | NA | 0     | 0     |
| S3_extracted_k141_127450     | 31350  | No  | NA | 12 | 0  | Complete       | High-quality    | NA | 100   | 0     |
| S3_extracted_k141_127464     | 4249   | No  | NA | 0  | 0  | Not-determined | Genome-fragment | NA | 0     | 0     |
| S5_vs_k141_119605[full]      | 56346  | Yes | NA | 21 | 10 | High-quality   | High-quality    | NA | 96.21 | 18.44 |
| S3_vs_k141_80151[full]       | 14901  | No  | NA | 22 | 4  | High-quality   | High-quality    | NA | 98.71 | 0     |
| S3_vs_k141_16825[full]       | 60023  | No  | NA | 17 | 3  | High-quality   | High-quality    | NA | 95.83 | 0     |
| S5_vs_k141_49835[full]       | 38726  | No  | NA | 8  | 0  | High-quality   | High-quality    | NA | 99.13 | 0     |
| S3_vs_k141_114293[full]      | 1633   | No  | NA | 0  | 1  | High-quality   | Genome-fragment | NA | 100   | 0     |
| S3_vs_k141_89485[full]       | 36153  | No  | NA | 12 | 1  | High-quality   | High-quality    | NA | 93.64 | 0     |
| S3_vs_k141_81793[full]       | 74426  | No  | NA | 21 | 7  | High-quality   | High-quality    | NA | 100   | 0     |
| S3_vs_k141_90331[full]       | 52928  | No  | NA | 29 | 0  | High-quality   | High-quality    | NA | 95.06 | 0     |
| S3_vs_k141_90341[full]       | 33590  | No  | NA | 1  |    |                |                 |    |       |       |



|                           |       |     |       |    |    |                |                 |       |       |
|---------------------------|-------|-----|-------|----|----|----------------|-----------------|-------|-------|
| S14_extracted_k141_986    | 1634  | No  | NA    | 2  | 0  | Low-quality    | Genome-fragment | 5.2   | 0     |
| S3_vs_k141_79764[full]    | 1024  | No  | NA    | 1  | 1  | Not-determined | Genome-fragment | NA    | 0     |
| S3_vs_k141_92[full]       | 2016  | No  | NA    | 0  | 1  | Not-determined | Genome-fragment | NA    | 0     |
| S3_extracted_k141_106067  | 1634  | No  | NA    | 2  | 0  | Low-quality    | Genome-fragment | 4.07  | 0     |
| S3_vs_k141_43844[full]    | 3442  | No  | NA    | 0  | 4  | Not-determined | Genome-fragment | NA    | 0     |
| S3_vs_k141_55912[full]    | 2346  | No  | NA    | 0  | 0  | Not-determined | Genome-fragment | NA    | 0     |
| S3_vs_k141_31953[full]    | 4528  | No  | NA    | 0  | 4  | Not-determined | Genome-fragment | NA    | 0     |
| S3_vs_k141_39930[full]    | 6892  | No  | NA    | 0  | 4  | Not-determined | Genome-fragment | NA    | 0     |
| S5_extracted_k141_133937  | 1634  | No  | NA    | 0  | 0  | Low-quality    | Catome-fragment | 3.3   | 0     |
| S16_vs_15001[full]        | 1634  | No  | NA    | 0  | 1  | Low-quality    | Genome-fragment | 4.3   | 0     |
| S3_vs_k141_71927[full]    | 1093  | No  | NA    | 0  | 1  | Not-determined | Genome-fragment | NA    | 0     |
| S3_vs_k141_39940[full]    | 20073 | No  | NA    | 0  | 0  | Medium-quality | Genome-fragment | 51.66 | 0     |
| S3_vs_k141_87771[full]    | 1432  | No  | NA    | 7  | 0  | Not-determined | Genome-fragment | NA    | 0     |
| S3_vs_k141_63915[full]    | 2316  | No  | NA    | 0  | 0  | Not-determined | Genome-fragment | NA    | 0     |
| S16_vs_15781[full]        | 1634  | No  | NA    | 0  | 0  | Low-quality    | Genome-fragment | 3.46  | 0     |
| S3_vs_k141_6161[full]     | 2713  | No  | NA    | 0  | 0  | Not-determined | Genome-fragment | NA    | 0     |
| S3_vs_k141_119660[full]   | 39852 | Yes | 33361 | 7  | 6  | Medium-quality | Genome-fragment | 77.89 | 16.29 |
| S3_vs_k141_39945[full]    | 2283  | No  | NA    | 0  | 0  | Not-determined | Genome-fragment | NA    | 0     |
| S3_vs_k141_103686[full]   | 5220  | No  | NA    | 0  | 2  | Not-determined | Genome-fragment | NA    | 0     |
| S12_extracted_k141_110789 | 1634  | No  | NA    | 0  | 0  | Low-quality    | Genome-fragment | 5.74  | 0     |
| S4_extracted_8439         | 1634  | No  | NA    | 3  | 0  | Low-quality    | Genome-fragment | 5.37  | 0     |
| S3_vs_k141_63954[full]    | 1797  | No  | NA    | 0  | 2  | Not-determined | Genome-fragment | NA    | 0     |
| S3_vs_k141_24158[full]    | 1725  | No  | NA    | 0  | 0  | Not-determined | Genome-fragment | NA    | 0     |
| S11_vs_k141_49476[full]   | 1635  | No  | NA    | 0  | 0  | Low-quality    | Genome-fragment | 3.17  | 0     |
| S3_vs_k141_79870[full]    | 3755  | No  | NA    | 0  | 0  | Not-determined | Genome-fragment | NA    | 0     |
| S3_vs_k141_111755[full]   | 1684  | No  | NA    | 0  | 3  | Not-determined | Genome-fragment | NA    | 0     |
| S3_vs_k141_48147[full]    | 2391  | No  | NA    | 0  | 1  | Not-determined | Genome-fragment | NA    | 0     |
| S3_vs_k141_31721[full]    | 10396 | No  | NA    | 0  | 0  | Not-determined | Genome-fragment | NA    | 0     |
| S11_vs_k141_57282[full]   | 1635  | No  | NA    | 0  | 0  | Low-quality    | Genome-fragment | 2.14  | 0     |
| S3_vs_k141_24181[full]    | 1835  | No  | NA    | 0  | 1  | Not-determined | Genome-fragment | NA    | 0     |
| S3_vs_k141_81761[full]    | 1809  | No  | NA    | 0  | 1  | Not-determined | Genome-fragment | NA    | 0     |
| S1_extracted_k141_20918   | 1635  | No  | NA    | 2  | 0  | Low-quality    | Genome-fragment | 2.53  | 0     |
| S5_vs_k141_91473[full]    | 1635  | No  | NA    | 0  | 0  | Low-quality    | Genome-fragment | 2.92  | 0     |
| S5_vs_k141_81764[full]    | 1635  | No  | NA    | 2  | 0  | Low-quality    | Genome-fragment | 3.47  | 0     |
| S3_vs_k141_113773[full]   | 1224  | No  | NA    | 0  | 0  | Not-determined | Genome-fragment | NA    | 0     |
| S7_vs_119162[full]        | 1635  | No  | NA    | 0  | 0  | Low-quality    | Genome-fragment | 3.28  | 0     |
| S3_vs_k141_8211[full]     | 2344  | No  | NA    | 0  | 2  | Not-determined | Genome-fragment | NA    | 0     |
| S3_vs_k141_48198[full]    | 1383  | No  | NA    | 0  | 0  | Not-determined | Genome-fragment | NA    | 0     |
| S3_vs_k141_95863[full]    | 3297  | No  | NA    | 2  | 2  | Not-determined | Genome-fragment | NA    | 0     |
| S17_vs_k141_34808[full]   | 1636  | No  | NA    | 2  | 0  | Low-quality    | Genome-fragment | 3.79  | 0     |
| S9_vs_k141_62755[full]    | 1636  | No  | NA    | 0  | 3  | Low-quality    | Genome-fragment | 2.42  | 0     |
| S11_extracted_k141_70736  | 1636  | No  | NA    | 1  | 0  | Low-quality    | Genome-fragment | 2.43  | 0     |
| S14_extracted_k141_112177 | 1636  | No  | NA    | 1  | 0  | Low-quality    | Genome-fragment | 2.01  | 0     |
| S14_vs_k141_62948[full]   | 1636  | No  | NA    | 0  | 1  | Low-quality    | Genome-fragment | 2.13  | 0     |
| S5_vs_k141_56864[full]    | 1636  | No  | NA    | 1  | 0  | Low-quality    | Genome-fragment | 4.98  | 0     |
| S16_vs_78602[full]        | 1636  | No  | NA    | 0  | 0  | Low-quality    | Genome-fragment | NA    | 0     |
| S3_vs_k141_95945[full]    | 1292  | No  | NA    | 0  | 1  | Not-determined | Genome-fragment | NA    | 0     |
| S16_vs_83831[full]        | 1636  | No  | NA    | 1  | 0  | Low-quality    | Genome-fragment | 3.07  | 0     |
| S12_vs_k141_24692[full]   | 1636  | No  | NA    | 0  | 0  | Low-quality    | Genome-fragment | 4.03  | 0     |
| S15_extracted_15688       | 1636  | No  | NA    | 0  | 0  | Low-quality    | Genome-fragment | 2.74  | 0     |
| S8_vs_k141_204706[full]   | 1636  | No  | NA    | 0  | 1  | Low-quality    | Genome-fragment | 2.58  | 0     |
| S2_vs_k141_103805[full]   | 2314  | No  | NA    | 0  | 4  | Not-determined | Genome-fragment | NA    | 0     |
| S3_vs_k141_8325[full]     | 2653  | No  | NA    | 0  | 2  | Not-determined | Genome-fragment | NA    | 0     |
| S3_vs_k141_87855[full]    | 6976  | No  | NA    | 0  | 4  | Not-determined | Genome-fragment | NA    | 0     |
| S2_vs_k141_111777[full]   | 3676  | No  | NA    | 0  | 1  | Not-determined | Genome-fragment | NA    | 0     |
| S3_vs_k141_48282[full]    | 5559  | No  | NA    | 0  | 4  | Not-determined | Genome-fragment | NA    | 0     |
| S17_extracted_k141_128181 | 1637  | No  | NA    | 0  | 0  | Low-quality    | Genome-fragment | 2.56  | 0     |
| S5_vs_k141_106941[full]   | 1637  | No  | NA    | 1  | 0  | Low-quality    | Genome-fragment | 3.4   | 0     |
| S7_vs_27921[full]         | 1637  | No  | NA    | 1  | 0  | Low-quality    | Genome-fragment | 4.38  | 0     |
| S7_vs_95330[full]         | 1637  | No  | NA    | 1  | 0  | Low-quality    | Genome-fragment | 3.37  | 0     |
| S16_vs_26471[full]        | 1637  | No  | NA    | 2  | 0  | Low-quality    | Genome-fragment | 4.83  | 0     |
| S10_vs_61580[full]        | 1637  | No  | NA    | 0  | 0  | Low-quality    | Genome-fragment | 4.09  | 0     |
| S3_vs_k141_96020[full]    | 1172  | No  | NA    | 0  | 2  | Not-determined | Genome-fragment | NA    | 0     |
| S4_extracted_8048         | 1637  | No  | NA    | 2  | 0  | Low-quality    | Genome-fragment | 5.38  | 0     |
| S4_extracted_8705         | 1637  | No  | NA    | 3  | 0  | Low-quality    | Genome-fragment | 5.39  | 0     |
| S6_vs_k141_42950[full]    | 1637  | No  | NA    | 1  | 0  | Low-quality    | Genome-fragment | 3.8   | 0     |
| S3_vs_k141_119771[full]   | 29244 | No  | NA    | 12 | 0  | Medium-quality | Genome-fragment | 79    | 0     |
| S17_vs_k141_125407[full]  | 1638  | Yes | 1020  | 1  | 1  | Low-quality    | Genome-fragment | 1.96  | 37.73 |
| S3_vs_k141_118271[full]   | 3588  | No  | NA    | 0  | 1  | Not-determined | Genome-fragment | NA    | 0     |
| S11_vs_k141_62130[full]   | 1638  | No  | NA    | 2  | 0  | Low-quality    | Genome-fragment | 2.71  | 0     |
| S1_extracted_k141_89058   | 1638  | No  | NA    | 1  | 0  | Low-quality    | Genome-fragment | 0.93  | 0     |
| S3_vs_k141_48365[full]    | 1148  | No  | NA    | 0  | 0  | Not-determined | Genome-fragment | NA    | 0     |
| S3_vs_k141_40161[full]    | 5268  | No  | NA    | 0  | 0  | Not-determined | Genome-fragment | NA    | 0     |
| S3_vs_k141_87897[full]    | 7660  | No  | NA    | 0  | 4  | Not-determined | Genome-fragment | NA    | 0     |
| S1_extracted_k141_56866   | 1638  | No  | NA    | 0  | 0  | Low-quality    | Genome-fragment | 1.24  | 0     |
| S3_vs_k141_103927[full]   | 2104  | No  | NA    | 0  | 1  | Not-determined | Genome-fragment | NA    | 0     |
| S3_vs_k141_40187[full]    | 9861  | No  | NA    | 0  | 0  | Not-determined | Genome-fragment | NA    | 0     |
| S3_vs_k141_96005[full]    | 1638  | No  | NA    | 1  | 0  | Low-quality    | Genome-fragment | 3.57  | 0     |
| S3_vs_k141_101857[full]   | 1638  | No  | NA    | 2  | 0  | Low-quality    | Genome-fragment | 2.36  | 0     |
| S3_vs_k141_75792[full]    | 1638  | No  | NA    | 0  | 0  | Low-quality    | Genome-fragment | 3.55  | 0     |
| S5_extracted_k141_59632   | 1638  | No  | NA    | 0  | 0  | Low-quality    | Genome-fragment | 2.66  | 0     |
| S7_vs_85001[full]         | 1638  | No  | NA    | 0  | 0  | Low-quality    | Genome-fragment | 3.43  | 0     |
| S16_extracted_4702        | 1638  | No  | NA    | 0  | 0  | Low-quality    | Genome-fragment | 1.28  | 0     |
| S16_extracted_56025       | 1638  | No  | NA    | 0  | 1  | Low-quality    | Genome-fragment | 0.93  | 0     |
| S3_vs_k141_48407[full]    | 3063  | No  | NA    | 0  | 1  | Not-determined | Genome-fragment | NA    | 0     |
| S3_vs_k141_24401[full]    | 3250  | No  | NA    | 0  | 0  | Not-determined | Genome-fragment | NA    | 0     |
| S16_vs_116854[full]       | 1638  | No  | NA    | 0  | 0  | Low-quality    | Genome-fragment | 3.05  | 0     |
| S16_vs_116978[full]       | 1638  | No  | NA    | 0  | 0  | Low-quality    | Genome-fragment | 3.61  | 0     |
| S3_vs_k141_40278[full]    | 2117  | No  | NA    | 0  | 1  | Not-determined | Genome-fragment | NA    | 0     |
| S12_vs_k141_171481[full]  | 1638  | No  | NA    | 0  | 0  | Low-quality    | Genome-fragment | 3.26  | 0     |
| S4_extracted_24905        | 1638  | No  | NA    | 1  | 0  | Low-quality    | Genome-fragment | 4.01  | 0     |
| S8_vs_k141_201666[full]   | 1638  | No  | NA    | 0  | 0  | Low-quality    | Genome-fragment | 1.07  | 0     |
| S8_vs_k141_32766[full]    | 1638  | No  | NA    | 0  | 1  | Low-quality    | Genome-fragment | 2.51  | 0     |
| S3_vs_k141_96148[full]    | 15544 | No  | NA    | 0  | 12 | Not-determined | Genome-fragment | NA    | 0     |
| S3_vs_k141_32421[full]    | 1991  | No  | NA    | 0  | 0  | Not-determined | Genome-fragment | NA    | 0     |
| S11_vs_k141_57136[full]   | 1639  | No  | NA    | 3  | 0  | Low-quality    | Genome-fragment | 3.46  | 0     |
| S14_extracted_k141_50222  | 1639  | No  | NA    | 0  | 0  | Low-quality    | Genome-fragment | 3.16  | 0     |
| S3_vs_k141_24348[full]    | 5402  | No  | NA    | 0  | 2  | Not-determined | Genome-fragment | NA    | 0     |
| S3_vs_k141_12441[full]    | 1008  | No  | NA    | 0  | 2  | Not-determined | Genome-fragment | NA    | 0     |
| S3_vs_k141_104054[full]   | 2204  | No  | NA    | 0  | 0  | Not-determined | Genome-fragment | NA    | 0     |
| S3_vs_k141_71218[full]    | 34453 | No  | NA    | 8  | 0  | Medium-quality | Genome-fragment | 87.8  | 0     |
| S3_vs_k141_16171[full]    | 2213  | No  | NA    | 1  | 0  | Not-determined | Genome-fragment | NA    | 0     |
| S7_vs_30360[full]         | 1639  | No  | NA    | 1  | 0  | Low-quality    | Genome-fragment | 1.89  | 0     |
| S3_vs_k141_12474[full]    | 3674  | No  | NA    | 0  | 1  | Not-determined | Genome-fragment | NA    | 0     |
| S3_vs_k141_38048[full]    | 4374  | No  | NA    | 0  | 1  | Not-determined | Genome-fragment | NA    | 0     |
| S16_vs_140237[full]       | 1639  | No  | NA    | 0  | 1  | Low-quality    | Genome-fragment | 1.31  | 0     |
| S10_vs_30570[full]        | 1639  | No  | NA    | 0  | 1  | Low-quality    | Genome-fragment | 1.12  | 0     |
| S3_vs_k141_40395[full]    | 1574  | No  | NA    | 0  | 1  | Not-determined | Genome-fragment | NA    | 0     |
| S3_vs_k141_30179[full]    | 2044  | No  | NA    | 0  | 1  | Not-determined | Genome-fragment | NA    | 0     |
| S8_extracted_k141_127516  | 1639  | No  | NA    | 0  | 0  | Low-quality    | Genome-fragment | 3.34  | 0     |
| S3_vs_k141_72131[full]    | 1914  | No  | NA    | 0  | 2  | Not-determined | Genome-fragment | NA    | 0     |
| S8_vs_k141_55073[full]    | 1639  | No  | NA    | 0  | 0  | Low-quality    | Genome-fragment | 3.18  | 0     |
| S3_vs_k141_8745[full]     | 1916  | No  | NA    | 0  | 0  | Not-determined | Genome-fragment | NA    | 0     |
| S17_vs_k141_22857[full]   | 1640  | No  | NA    | 0  | 1  | Low-quality    | Genome-fragment | 2.98  | 0     |
| S11_extracted_k141_8974   | 1640  | No  | NA    | 0  | 0  | Low-quality    | Genome-fragment | 2.32  | 0     |
| S3_vs_k141_111987[full]   | 1526  | No  | NA    | 0  | 1  | Not-determined | Genome-fragment | NA    | 0     |
| S11_vs_k141_43665[full]   | 1640  | No  | NA    | 0  | 0  | Low-quality    | Genome-fragment | 1.47  | 0     |
| S12_vs_k141_48507[full]   | 3855  | No  | NA    | 0  | 1  | Not-determined | Genome-fragment | NA    | 0     |
| S3_vs_k141_104138[full]   | 1213  | No  | NA    | 0  | 0  | Not-determined | Genome-fragment | NA    | 0     |
| S3_vs_k141_6891[full]     | 1178  | No  | NA    | 0  | 0  | Not-determined | Genome-fragment | NA    | 0     |
| S3_vs_k141_86101[full]    | 1764  | No  | NA    | 0  | 1  | Not-determined | Genome-fragment | NA    | 0     |
| S1_vs_k141_100517[full]   | 1640  | No  | NA    | 0  | 0  | Low-quality    | Genome-fragment | 3.58  | 0     |
| S3_vs_k141_56292[full]    | 52629 | No  | NA    | 13 | 2  | High-quality   | High-quality    | 100   | 0     |
| S7_vs_81828[full]         | 1640  | No  | NA    | 0  | 0  | Low-quality    | Genome-fragment | 2.82  | 0     |
| S12_vs_k141_178939[full]  | 1640  | No  | NA    | 1  | 0  | Low-quality    | Genome-fragment | 1     | 0     |
| S3_vs_k141_7181[full]     | 6579  | No  | NA    | 0  | 3  | Not-determined | Genome-fragment | NA    | 0     |
| S3_vs_k141_96281[full]    | 1103  | No  | NA    | 0  | 0  | Not-determined | Genome-fragment | NA    | 0     |
| S3_vs_k141_48591[full]    | 4998  | No  | NA    | 0  | 3  | Not-determined | Genome-fragment | NA    | 0     |
| S17_vs_k141_3763[full]    | 1641  | No  | NA    | 1  | 0  | Low-quality    | Genome-fragment | 4.34  | 0     |
| S9_extracted_k141_87446   | 1641  | No  | NA    | 2  | 0  | Low-quality    | Genome-fragment | 2.42  | 0     |
| S9_extracted_k141_47263   | 1641  | No  | NA    | 0  | 1  | Low-quality    | Genome-fragment | 2.95  | 0     |
| S11_vs_k141_83833[full]   | 1641  | No  | NA    | 0  | 1  | Low-quality    | Genome-fragment | 0.99  | 0     |
| S5_vs_k141_100990[full]   | 1641  | No  | NA    | 2  | 0  | Low-quality    | Genome-fragment | 2.56  | 0     |
| S3_vs_k141_12679[full]    | 4566  | No  | NA    | 0  | 4  | Not-determined | Genome-fragment | NA    | 0     |
| S3_vs_k141_80301[full]    | 1067  | No  | NA    | 0  | 1  | Not-determined | Genome-fragment | NA    | 0     |
| S7_vs_111011[full]        | 1641  | No  | NA    | 1  | 0  | Low-quality    | Genome-fragment | 3.22  | 0     |
| S16_extracted_59694       | 1641  | No  | NA    | 0  | 0  | Low-quality    | Genome-fragment | 1.54  | 0     |
| S16_extracted_97501       | 1641  | No  | NA    | 0  | 0  | Low-quality    | Genome-fragment | 2.66  | 0     |
| S10_vs_103423[full]       | 1641  | No  | NA    | 0  | 2  | Low-quality    | Genome-fragment | 0.73  | 0     |
| S3_vs_k141_48664[full]    | 1105  | No  | NA    | 0  | 0  | Not-determined | Genome-fragment | NA    | 0     |
| S3_vs_k141_112078[full]   | 3721  | No  | NA    | 0  | 1  | Not-determined | Genome-fragment | NA    | 0     |
| S12_vs_k141_79892[full]   | 1641  | No  | NA    | 0  | 1  | Low-quality    | Genome-fragment | 4.72  | 0     |
| S3_vs_k141_48675[full]    | 2986  | No  | NA    | 0  | 2  | Not-determined | Genome-fragment | NA    | 0     |
| S9_vs_k141_13203[full]    | 1642  | No  | NA    | 1  | 0  | Low-quality    | Genome-fragment | 3.28  | 0     |
| S11_vs_k141_3009[full]    |       |     |       |    |    |                |                 |       |       |



|                           |       |     |    |       |    |                  |                 |              |     |       |
|---------------------------|-------|-----|----|-------|----|------------------|-----------------|--------------|-----|-------|
| S1_extracted_k141_94964   | 1643  | No  | NA | 2     | 0  | Low-quality      | Genome-fragment | 1.66         | 0   |       |
| S10_vs_k141_15946  full   | 1643  | No  | NA | 0     | 0  | Low-quality      | Genome-fragment | 1.52         | 0   |       |
| S12_vs_k141_16942  full   | 1643  | No  | NA | 0     | 0  | Low-quality      | Genome-fragment | 1.08         | 0   |       |
| S3_vs_k141_64376  full    | 1872  | No  | NA | 0     | 1  | Not-determined   | Genome-fragment | NA           | 0   |       |
| S8_vs_k141_122447  12gene | 1643  | No  | NA | 2     | 0  | Low-quality      | Genome-fragment | 4.36         | 0   |       |
| S14_extracted_k141_50918  | 1644  | No  | NA | 1     | 0  | Low-quality      | Genome-fragment | 1.21         | 0   |       |
| S7_vs_27495  full         | 1644  | No  | NA | 1     | 0  | Low-quality      | Genome-fragment | 3.91         | 0   |       |
| S7_vs_55814  full         | 1644  | No  | NA | 0     | 0  | Low-quality      | Genome-fragment | 2.57         | 0   |       |
| S3_vs_k141_104376  full   | 1374  | No  | NA | 0     | 0  | Not-determined   | Genome-fragment | NA           | 0   |       |
| S3_vs_k141_48813  full    | 2814  | No  | NA | 0     | 2  | Not-determined   | Genome-fragment | NA           | 0   |       |
| S3_vs_k141_88322  full    | 1682  | No  | NA | 0     | 2  | Not-determined   | Genome-fragment | NA           | 0   |       |
| S7_vs_40578  12gene       | 1644  | No  | NA | 2     | 0  | Low-quality      | Genome-fragment | 4.77         | 0   |       |
| S16_vs_33663  full        | 1644  | No  | NA | 1     | 0  | Low-quality      | Genome-fragment | 1.47         | 0   |       |
| S3_vs_k141_96557  full    | 2372  | No  | NA | 0     | 1  | Not-determined   | Genome-fragment | NA           | 0   |       |
| S3_vs_k141_32914  full    | 1468  | No  | NA | 0     | 1  | Not-determined   | Genome-fragment | NA           | 0   |       |
| S3_vs_k141_32915  full    | 1359  | No  | NA | 0     | 1  | Not-determined   | Genome-fragment | NA           | 0   |       |
| S3_vs_k141_96565  full    | 3380  | No  | NA | 0     | 0  | Not-determined   | Genome-fragment | NA           | 0   |       |
| S3_vs_k141_88328  full    | 3215  | No  | NA | 0     | 1  | Not-determined   | Genome-fragment | NA           | 0   |       |
| S2_vs_k141_104387  full   | 1655  | No  | NA | 0     | 2  | Not-determined   | Genome-fragment | NA           | 0   |       |
| S12_vs_k141_182122  full  | 1644  | No  | NA | 0     | 0  | Low-quality      | Genome-fragment | 3.13         | 0   |       |
| S3_vs_k141_9158  full     | 61321 | Yes | NA | 29689 | 9  | 24               | High-quality    | High-quality | 100 | 51.58 |
| S8_vs_k141_150956  full   | 1644  | No  | NA | 3     | 0  | Low-quality      | Genome-fragment | 3.82         | 0   |       |
| S11_vs_k141_88646  full   | 1645  | No  | NA | 2     | 0  | Low-quality      | Genome-fragment | 1.93         | 0   |       |
| S5_vs_k141_46462  full    | 1645  | No  | NA | 0     | 0  | Low-quality      | Genome-fragment | 0.59         | 0   |       |
| S7_vs_36434  full         | 1645  | No  | NA | 0     | 0  | Low-quality      | Genome-fragment | 4.04         | 0   |       |
| S3_vs_k141_88386  full    | 6549  | No  | NA | 0     | 4  | Not-determined   | Genome-fragment | NA           | 0   |       |
| S16_vs_5411  full         | 1645  | No  | NA | 0     | 0  | Low-quality      | Genome-fragment | 2.18         | 0   |       |
| S3_vs_k141_3194  full     | 4156  | No  | NA | 0     | 2  | Not-determined   | Genome-fragment | NA           | 0   |       |
| S2_vs_k141_64424  full    | 75232 | No  | NA | 1     | 20 | High-quality     | High-quality    | 100          | 0   |       |
| S10_vs_41831  full        | 1645  | No  | NA | 0     | 0  | Low-quality      | Genome-fragment | 4.2          | 0   |       |
| S12_extracted_k141_183839 | 1645  | No  | NA | 0     | 1  | Low-quality      | Genome-fragment | 0.73         | 0   |       |
| S12_vs_k141_58152  full   | 1645  | No  | NA | 0     | 0  | Low-quality      | Genome-fragment | 2.9          | 0   |       |
| S3_vs_k141_9260  full     | 1648  | No  | NA | 0     | 1  | Not-determined   | Genome-fragment | NA           | 0   |       |
| S3_vs_k141_48980  full    | 4622  | No  | NA | 0     | 0  | Not-determined   | Genome-fragment | NA           | 0   |       |
| S9_vs_k141_12913  full    | 1646  | No  | NA | 0     | 1  | Low-quality      | Genome-fragment | 2.74         | 0   |       |
| S3_vs_k141_112370  full   | 4200  | No  | NA | 0     | 0  | Not-determined   | Genome-fragment | NA           | 0   |       |
| S3_vs_k141_80602  full    | 10591 | No  | NA | 0     | 2  | Not-determined   | Genome-fragment | NA           | 0   |       |
| S3_vs_k141_13050  full    | 2746  | No  | NA | 0     | 3  | Not-determined   | Genome-fragment | NA           | 0   |       |
| S3_vs_k141_9384  full     | 1747  | No  | NA | 0     | 0  | Not-determined   | Genome-fragment | NA           | 0   |       |
| S3_vs_k141_33069  full    | 2655  | No  | NA | 0     | 2  | Not-determined   | Genome-fragment | NA           | 0   |       |
| S3_vs_k141_9295  full     | 7376  | No  | NA | 0     | 1  | Not-determined   | Genome-fragment | NA           | 0   |       |
| S9_vs_k141_37600  full    | 1646  | No  | NA | 0     | 2  | Low-quality      | Genome-fragment | 0.51         | 0   |       |
| S11_vs_k141_86895  full   | 1646  | No  | NA | 0     | 1  | Low-quality      | Genome-fragment | 0.64         | 0   |       |
| S13_extracted_149466      | 1646  | No  | NA | 0     | 0  | Low-quality      | Genome-fragment | 4.45         | 0   |       |
| S14_vs_k141_22761  full   | 1646  | No  | NA | 0     | 0  | Low-quality      | Genome-fragment | 3.13         | 0   |       |
| S3_vs_k141_64533  full    | 1583  | No  | NA | 0     | 0  | Not-determined   | Genome-fragment | NA           | 0   |       |
| S1_vs_k141_143165  full   | 1646  | No  | NA | 0     | 0  | Low-quality      | Genome-fragment | 1.06         | 0   |       |
| S3_vs_k141_4905  full     | 7143  | No  | NA | 0     | 5  | Not-determined   | Genome-fragment | NA           | 0   |       |
| S3_vs_k141_27872  full    | 1646  | No  | NA | 0     | 0  | Low-quality      | Genome-fragment | 2.69         | 0   |       |
| S7_vs_27285  full         | 1646  | No  | NA | 0     | 0  | Low-quality      | Genome-fragment | 4.77         | 0   |       |
| S12_vs_k141_956  full     | 1646  | No  | NA | 1     | 0  | Low-quality      | Genome-fragment | 2.16         | 0   |       |
| S17_extracted_k141_153151 | 1647  | No  | NA | 0     | 1  | Low-quality      | Genome-fragment | 0.97         | 0   |       |
| S3_vs_k141_80675  full    | 2357  | No  | NA | 0     | 1  | Not-determined   | Genome-fragment | NA           | 0   |       |
| S17_vs_k141_175446  full  | 1647  | No  | NA | 1     | 0  | Low-quality      | Genome-fragment | 2.8          | 0   |       |
| S2_vs_k141_49085  full    | 1374  | No  | NA | 0     | 1  | Not-determined   | Genome-fragment | NA           | 0   |       |
| S11_extracted_k141_1869   | 1647  | No  | NA | 0     | 1  | Low-quality      | Genome-fragment | 0.23         | 0   |       |
| S3_vs_k141_1031  full     | 14570 | No  | NA | 10    | 0  | Medium-quality   | Genome-fragment | 57.41        | 0   |       |
| S3_vs_k141_16537  full    | 7661  | No  | NA | 0     | 3  | Not-determined   | Genome-fragment | NA           | 0   |       |
| S3_vs_k141_56865  full    | 1993  | No  | NA | 0     | 1  | Not-determined   | Genome-fragment | NA           | 0   |       |
| S14_extracted_k141_62112  | 1647  | No  | NA | 1     | 0  | Low-quality      | Genome-fragment | 3.31         | 0   |       |
| S3_vs_k141_145328  full   | 1647  | No  | NA | 0     | 2  | Low-quality      | Genome-fragment | 0.52         | 0   |       |
| S3_vs_k141_56906  full    | 1774  | No  | NA | 0     | 1  | Not-determined   | Genome-fragment | NA           | 0   |       |
| S3_vs_k141_49173  full    | 2108  | No  | NA | 0     | 2  | Not-determined   | Genome-fragment | NA           | 0   |       |
| S3_vs_k141_104542  full   | 2221  | No  | NA | 0     | 1  | Not-determined   | Genome-fragment | NA           | 0   |       |
| S7_vs_29074  full         | 1647  | No  | NA | 0     | 0  | Low-quality      | Genome-fragment | 4.75         | 0   |       |
| S15_extracted_53854       | 1647  | No  | NA | 1     | 0  | Low-quality      | Genome-fragment | 0.99         | 0   |       |
| S3_vs_k141_49200  full    | 14483 | No  | NA | 0     | 8  | Not-determined   | Genome-fragment | NA           | 0   |       |
| S17_extracted_k141_115356 | 1648  | No  | NA | 0     | 0  | Low-quality      | Genome-fragment | 1.05         | 0   |       |
| S17_vs_k141_30522  full   | 1648  | No  | NA | 0     | 1  | Low-quality      | Genome-fragment | 3.45         | 0   |       |
| S14_vs_k141_10248  full   | 1648  | No  | NA | 2     | 0  | Low-quality      | Genome-fragment | 4.15         | 0   |       |
| S14_vs_k141_101183  full  | 1648  | No  | NA | 0     | 1  | Low-quality      | Genome-fragment | 2.03         | 0   |       |
| S3_vs_k141_119228  full   | 1648  | No  | NA | 0     | 0  | Low-quality      | Genome-fragment | 0.43         | 0   |       |
| S5_vs_k141_44034  full    | 1648  | No  | NA | 0     | 0  | Low-quality      | Genome-fragment | 3.38         | 0   |       |
| S5_vs_k141_134600  full   | 1648  | No  | NA | 0     | 0  | Low-quality      | Genome-fragment | 3.95         | 0   |       |
| S3_vs_k141_73225  full    | 1471  | No  | NA | 0     | 0  | Not-determined   | Genome-fragment | NA           | 0   |       |
| S16_vs_72248  full        | 1648  | No  | NA | 2     | 0  | Low-quality      | Genome-fragment | 4.38         | 0   |       |
| S12_vs_k141_12877  full   | 1648  | No  | NA | 1     | 0  | Low-quality      | Genome-fragment | 3.76         | 0   |       |
| S3_vs_k141_80832  full    | 2302  | No  | NA | 0     | 1  | Not-determined   | Genome-fragment | NA           | 0   |       |
| S12_vs_k141_132657  full  | 1648  | No  | NA | 0     | 0  | Low-quality      | Genome-fragment | 2.83         | 0   |       |
| S3_vs_k141_9582  full     | 2344  | No  | NA | 0     | 2  | Not-determined   | Genome-fragment | NA           | 0   |       |
| S3_vs_k141_49309  full    | 2239  | No  | NA | 0     | 2  | Not-determined   | Genome-fragment | NA           | 0   |       |
| S15_vs_31088  full        | 1648  | No  | NA | 0     | 0  | Low-quality      | Genome-fragment | 4.19         | 0   |       |
| S15_vs_45085  full        | 1648  | No  | NA | 0     | 2  | Low-quality      | Genome-fragment | 1.55         | 0   |       |
| S14_vs_k141_72769  full   | 1649  | No  | NA | 1     | 0  | Low-quality      | Genome-fragment | 2.09         | 0   |       |
| S3_vs_k141_73307  full    | 2826  | No  | NA | 0     | 0  | Not-determined   | Genome-fragment | NA           | 0   |       |
| S5_extracted_k141_88494   | 1649  | No  | NA | 4     | 0  | Low-quality      | Genome-fragment | 4.07         | 0   |       |
| S5_vs_k141_29243  full    | 1649  | No  | NA | 1     | 0  | Low-quality      | Genome-fragment | 2.63         | 0   |       |
| S7_extracted_31051        | 1649  | No  | NA | 1     | 0  | Low-quality      | Genome-fragment | 3.56         | 0   |       |
| S16_extracted_154645      | 1649  | Yes | NA | 713   | 1  | Low-quality      | Genome-fragment | 56.76        | 0   |       |
| S3_vs_k141_73348  full    | 3037  | No  | NA | 0     | 3  | Not-determined   | Genome-fragment | NA           | 0   |       |
| S16_vs_121784  full       | 1649  | No  | NA | 2     | 0  | Low-quality      | Genome-fragment | 2.46         | 0   |       |
| S12_extracted_k141_45869  | 1649  | No  | NA | 0     | 2  | Low-quality      | Genome-fragment | 0.93         | 0   |       |
| S3_vs_k141_57093  full    | 11866 | No  | NA | 0     | 8  | Not-determined   | Genome-fragment | NA           | 0   |       |
| S8_extracted_k141_149377  | 1649  | No  | NA | 1     | 0  | Low-quality      | Genome-fragment | 5.24         | 0   |       |
| S8_extracted_k141_81437   | 1649  | No  | NA | 0     | 0  | Low-quality      | Genome-fragment | 3.74         | 0   |       |
| S8_vs_k141_128987  full   | 1649  | No  | NA | 0     | 0  | Low-quality      | Genome-fragment | 4.07         | 0   |       |
| S9_vs_k141_7485  full     | 1650  | No  | NA | 0     | 0  | Low-quality      | Genome-fragment | 4.2          | 0   |       |
| S10_vs_k141_7386  full    | 33306 | No  | NA | 12    | 0  | High-quality     | High-quality    | 93.08        | 0   |       |
| S14_extracted_k141_29430  | 1650  | No  | NA | 2     | 0  | Low-quality      | Genome-fragment | 5.33         | 0   |       |
| S3_vs_k141_9663  full     | 1657  | No  | NA | 0     | 0  | Not-determined   | Genome-fragment | NA           | 0   |       |
| S3_vs_k141_40745  full    | 1650  | No  | NA | 2     | 0  | Low-quality      | Genome-fragment | 3.64         | 0   |       |
| S3_vs_k141_88676  full    | 1852  | No  | NA | 0     | 0  | Not-determined   | Genome-fragment | NA           | 0   |       |
| S3_vs_k141_1143  full     | 47753 | No  | NA | 22    | 0  | High-quality     | High-quality    | 97.11        | 0   |       |
| S7_vs_31711  full         | 1650  | No  | NA | 0     | 0  | Low-quality      | Genome-fragment | 3.8          | 0   |       |
| S3_vs_k141_1148  full     | 1276  | No  | NA | 0     | 1  | Not-determined   | Genome-fragment | NA           | 0   |       |
| S16_vs_8596  full         | 1650  | No  | NA | 2     | 0  | Low-quality      | Genome-fragment | 2.96         | 0   |       |
| S12_vs_k141_107906  full  | 1650  | No  | NA | 0     | 1  | Low-quality      | Genome-fragment | 1.23         | 0   |       |
| S8_vs_k141_108586  full   | 1650  | No  | NA | 2     | 0  | Low-quality      | Genome-fragment | 3.32         | 0   |       |
| S17_vs_k141_148482  full  | 1651  | No  | NA | 0     | 0  | Low-quality      | Genome-fragment | NA           | 0   |       |
| S3_vs_k141_25003  full    | 1170  | No  | NA | 0     | 0  | Not-determined   | Genome-fragment | NA           | 0   |       |
| S3_vs_k141_112485  full   | 2100  | No  | NA | 0     | 0  | Not-determined   | Genome-fragment | NA           | 0   |       |
| S3_vs_k141_51027  full    | 12069 | No  | NA | 0     | 3  | Not-determined   | Genome-fragment | NA           | 0   |       |
| S1_vs_k141_9523  full     | 1651  | No  | NA | 0     | 2  | Low-quality      | Genome-fragment | 1.34         | 0   |       |
| S3_extracted_k141_424258  | 1651  | No  | NA | 1     | 0  | Low-quality      | Genome-fragment | 1.91         | 0   |       |
| S3_vs_k141_104720  full   | 1075  | No  | NA | 0     | 0  | Not-determined   | Genome-fragment | NA           | 0   |       |
| S5_vs_k141_58398  full    | 1651  | No  | NA | 0     | 0  | Low-quality      | Genome-fragment | 1.02         | 0   |       |
| S16_extracted_92627       | 1651  | No  | NA | 2     | 0  | Low-quality      | Genome-fragment | 5.14         | 0   |       |
| S2_extracted_k141_81444   | 1651  | No  | NA | 0     | 0  | Low-quality      | Genome-fragment | 4.2          | 0   |       |
| S3_vs_k141_16808  full    | 4659  | No  | NA | 0     | 3  | Not-determined   | Genome-fragment | NA           | 0   |       |
| S8_extracted_k141_25276   | 1651  | No  | NA | 0     | 1  | Low-quality      | Genome-fragment | 2.08         | 0   |       |
| S3_vs_k141_25054  full    | 3286  | No  | NA | 0     | 0  | Not-determined   | Genome-fragment | NA           | 0   |       |
| S3_vs_k141_12047  full    | 1285  | No  | NA | 0     | 0  | Not-determined   | Genome-fragment | NA           | 0   |       |
| S3_vs_k141_9691  full     | 4469  | No  | NA | 0     | 0  | Not-determined   | Genome-fragment | NA           | 0   |       |
| S3_vs_k141_112528  full   | 5487  | No  | NA | 0     | 3  | Not-determined   | Genome-fragment | NA           | 0   |       |
| S2_vs_k141_81125  full    | 32048 | No  | NA | 0     | 6  | Not-determined   | Genome-fragment | NA           | 0   |       |
| S8_vs_k141_148611  full   | 1651  | No  | NA | 0     | 0  | Low-quality      | Genome-fragment | 4.26         | 0   |       |
| S11_vs_k141_1334  full    | 1652  | No  | NA | 0     | 1  | Low-quality      | Genome-fragment | 1.88         | 0   |       |
| S10_vs_k141_157534  full  | 1652  | No  | NA | 0     | 1  | Low-quality      | Genome-fragment | 1.04         | 0   |       |
| S5_vs_k141_33861  full    | 1652  | No  | NA | 2     | 0  | Low-quality      | Genome-fragment | 3.61         | 0   |       |
| S3_vs_k141_112563  full   | 2422  | No  | NA | 0     | 2  | Not-determined   | Genome-fragment | NA           | 0   |       |
| S3_vs_k141_3390  full     | 11860 | No  | NA | 0     | 3  | Not-determined   | Genome-fragment | NA           | 0   |       |
| S5_vs_k141_4764  full     | 1652  | No  | NA | 0     | 1  | Low-quality      | Genome-fragment | 2.95         | 0   |       |
| S7_vs_37827  full         | 1652  | No  | NA | 1     | 0  | Low-quality      | Genome-fragment | 3.66         | 0   |       |
| S3_vs_k141_16871  full    | 5026  | No  | NA | 0     | 0  | Not-determined   | Genome-fragment | NA           | 0   |       |
| S4_extracted_20052        | 1652  | No  | NA | 0     | 0  | Low-quality      | Genome-fragment | 1.77         | 0   |       |
| S6_vs_k141_7608  full     | 1652  | No  | NA | 0     | 0  | Low-quality      | Genome-fragment | 2.56         | 0   |       |
| S8_extracted_k141_120265  | 1652  | No  | NA | 0     | 0  | Low-quality      | Genome-fragment | 2.85         | 0   |       |
| S3_vs_k141_41108  full    | 1171  | No  | NA | 0     | 1  | Not-determined   | Genome-fragment | NA           | 0   |       |
| S11_vs_k141_13766  full   | 1653  | No  | NA | 0     | 0  | Low-quality      | Genome-fragment | NA           | 0   |       |
| S3_vs_k141_73473  full    | 2701  | No  | NA | 0     | 1  | Not-determined   | Genome-fragment | NA           | 0   |       |
| S11_vs_k141_26587  12gene | 1653  | No  | NA | 2     | 0  | Low-quality      | Genome-fragment | 4.37         | 0   |       |
| S10_vs_k141_144589  full  | 1653  | No  | NA | 3     | 0  | Low-quality      | Genome-fragment | 3.58         | 0   |       |
| S3_vs_k141_111880  full   | 1653  | No  | NA | 0     | 2  | Low-quality      | Genome-fragment | 0.73         | 0   |       |
| S3_vs_k141_9757  full     | 1291  | No  | NA | 0     | 2  | Not-determined</ |                 |              |     |       |



|                           |        |     |       |    |    |                |                 |      |       |   |
|---------------------------|--------|-----|-------|----|----|----------------|-----------------|------|-------|---|
| S3_vs_k141_49634  full    | 1022   | No  | NA    | 0  | 0  | Not-determined | Genome-fragment | NA   | 0     | 0 |
| S1_vs_k141_36479  full    | 1655   | No  | NA    | 0  | 0  | Low-quality    | Genome-fragment | 2.63 | 0     | 0 |
| S5_extracted_k141_102465  | 1655   | No  | NA    | 2  | 0  | Low-quality    | Genome-fragment | 3.41 | 0     | 0 |
| S3_vs_k141_120634  full   | 2430   | No  | NA    | 0  | 1  | Not-determined | Genome-fragment | NA   | 0     | 0 |
| S3_vs_k141_17171  full    | 8580   | No  | NA    | 0  | 4  | Not-determined | Genome-fragment | NA   | 0     | 0 |
| S16_extracted_116183      | 1655   | No  | NA    | 1  | 0  | Low-quality    | Genome-fragment | 0.92 | 0     | 0 |
| S16_vs_40164  full        | 1655   | No  | NA    | 1  | 0  | Low-quality    | Genome-fragment | 3.33 | 0     | 0 |
| S16_vs_102792  full       | 1655   | No  | NA    | 1  | 0  | Low-quality    | Genome-fragment | 0.94 | 0     | 0 |
| S3_vs_k141_81383  full    | 2145   | No  | NA    | 0  | 0  | Not-determined | Genome-fragment | NA   | 100   | 0 |
| S10_vs_95731  full        | 1655   | Yes | 1019  | 1  | 1  | Low-quality    | Genome-fragment | 2.44 | 38.43 | 0 |
| S12_vs_k141_116020  full  | 1655   | No  | NA    | 1  | 0  | Low-quality    | Genome-fragment | 3.49 | 0     | 0 |
| S5_vs_k141_21726  full    | 1655   | No  | NA    | 0  | 0  | Low-quality    | Genome-fragment | 4.59 | 0     | 0 |
| S3_vs_k141_57348  full    | 3197   | No  | NA    | 0  | 0  | Not-determined | Genome-fragment | NA   | 0     | 0 |
| S9_extracted_k141_19176   | 1656   | No  | NA    | 0  | 0  | Low-quality    | Genome-fragment | 3.71 | 0     | 0 |
| S9_vs_k141_21769  full    | 1656   | No  | NA    | 0  | 1  | Low-quality    | Genome-fragment | 3.62 | 0     | 0 |
| S3_vs_k141_57358  full    | 3003   | No  | NA    | 0  | 2  | Not-determined | Genome-fragment | NA   | 0     | 0 |
| S11_extracted_k141_34218  | 1656   | No  | NA    | 2  | 0  | Low-quality    | Genome-fragment | 4.06 | 0     | 0 |
| S11_vs_k141_10540  full   | 1656   | No  | NA    | 0  | 1  | Low-quality    | Genome-fragment | 2.58 | 0     | 0 |
| S2_vs_k141_112612  full   | 3380   | No  | NA    | 0  | 2  | Not-determined | Genome-fragment | NA   | 0     | 0 |
| S11_vs_k141_49140  H2gene | 1656   | No  | NA    | 2  | 0  | Low-quality    | Genome-fragment | 4.63 | 0     | 0 |
| S3_vs_k141_1563  full     | 3811   | No  | NA    | 0  | 2  | Not-determined | Genome-fragment | NA   | 2.96  | 0 |
| S7_extracted_8986         | 1656   | No  | NA    | 0  | 0  | Low-quality    | Genome-fragment | NA   | 0     | 0 |
| S3_vs_k141_57414  full    | 1816   | No  | NA    | 0  | 0  | Not-determined | Genome-fragment | NA   | 0     | 0 |
| S7_vs_71433  full         | 1656   | No  | NA    | 0  | 0  | Low-quality    | Genome-fragment | 3.52 | 0     | 0 |
| S10_vs_119575  full       | 1656   | No  | NA    | 1  | 0  | Low-quality    | Genome-fragment | 3.36 | 0     | 0 |
| S3_vs_k141_17458  full    | 103365 | Yes | 31917 | 16 | 46 | Complete       | High-quality    | 100  | 69.12 | 0 |
| S8_extracted_k141_194025  | 1656   | No  | NA    | 3  | 0  | Low-quality    | Genome-fragment | 4.03 | 0     | 0 |
| S3_vs_k141_112879  full   | 2788   | No  | NA    | 0  | 2  | Not-determined | Genome-fragment | NA   | 0     | 0 |
| S8_vs_k141_69179  full    | 1656   | No  | NA    | 0  | 1  | Low-quality    | Genome-fragment | 2.67 | 0     | 0 |
| S17_vs_k141_135031  full  | 1657   | No  | NA    | 1  | 0  | Low-quality    | Genome-fragment | 3.67 | 0     | 0 |
| S9_vs_k141_63142  full    | 1657   | No  | NA    | 1  | 0  | Low-quality    | Genome-fragment | 4.34 | 0     | 0 |
| S1_vs_k141_98559  full    | 1657   | No  | NA    | 1  | 1  | Low-quality    | Genome-fragment | 1.98 | 0     | 0 |
| S3_vs_k141_81456  full    | 1217   | No  | NA    | 0  | 1  | Not-determined | Genome-fragment | NA   | 0     | 0 |
| S3_vs_k141_49754  full    | 1034   | No  | NA    | 0  | 2  | Not-determined | Genome-fragment | NA   | 0     | 0 |
| S3_vs_k141_112921  full   | 3701   | No  | NA    | 0  | 0  | Not-determined | Genome-fragment | NA   | 0     | 0 |
| S3_vs_k141_124242  full   | 1370   | No  | NA    | 0  | 2  | Not-determined | Genome-fragment | NA   | 0     | 0 |
| S5_extracted_k141_41455   | 1657   | No  | NA    | 1  | 0  | Low-quality    | Genome-fragment | 0.47 | 0     | 0 |
| S5_vs_k141_86174  full    | 1657   | No  | NA    | 1  | 0  | Low-quality    | Genome-fragment | 3.92 | 0     | 0 |
| S3_vs_k141_41448  full    | 3321   | No  | NA    | 1  | 1  | Not-determined | Genome-fragment | NA   | 0     | 0 |
| S3_vs_k141_89104  full    | 1444   | No  | NA    | 0  | 1  | Not-determined | Genome-fragment | NA   | 0     | 0 |
| S3_vs_k141_89108  full    | 1391   | No  | NA    | 0  | 2  | Not-determined | Genome-fragment | NA   | 0     | 0 |
| S3_vs_k141_17237  full    | 2676   | No  | NA    | 0  | 0  | Not-determined | Genome-fragment | NA   | 1.4   | 0 |
| S3_vs_k141_65167  full    | 2388   | No  | NA    | 0  | 1  | Not-determined | Genome-fragment | NA   | 0     | 0 |
| S3_vs_k141_120794  full   | 1729   | No  | NA    | 0  | 1  | Not-determined | Genome-fragment | NA   | 0     | 0 |
| S10_extracted_110728      | 1657   | No  | NA    | 0  | 1  | Low-quality    | Genome-fragment | NA   | 0.65  | 0 |
| S3_vs_k141_15321  full    | 2016   | No  | NA    | 0  | 1  | Not-determined | Genome-fragment | NA   | 0     | 0 |
| S3_vs_k141_89158  full    | 5695   | No  | NA    | 0  | 2  | Not-determined | Genome-fragment | NA   | 0     | 0 |
| S12_vs_k141_127493  full  | 1657   | No  | NA    | 2  | 0  | Low-quality    | Genome-fragment | 4.38 | 0     | 0 |
| S12_vs_k141_106180  full  | 1657   | No  | NA    | 0  | 2  | Low-quality    | Genome-fragment | 2.36 | 0     | 0 |
| S2_vs_k141_13501  H2gene  | 1657   | No  | NA    | 1  | 0  | Low-quality    | Genome-fragment | 4.11 | 0     | 0 |
| S9_vs_k141_12219  full    | 1658   | No  | NA    | 0  | 2  | Low-quality    | Genome-fragment | 3.17 | 0     | 0 |
| S2_vs_k141_17275  full    | 1662   | No  | NA    | 0  | 0  | Not-determined | Genome-fragment | NA   | 0     | 0 |
| S3_vs_k141_10294  full    | 6670   | No  | NA    | 0  | 7  | Not-determined | Genome-fragment | NA   | 0     | 0 |
| S3_vs_k141_97435  full    | 1226   | No  | NA    | 0  | 0  | Not-determined | Genome-fragment | NA   | 0     | 0 |
| S13_vs_5899  full         | 1658   | No  | NA    | 0  | 0  | Low-quality    | Genome-fragment | NA   | 1.16  | 0 |
| S3_vs_k141_89256  full    | 3910   | No  | NA    | 0  | 2  | Not-determined | Genome-fragment | NA   | 0     | 0 |
| S5_vs_k141_111975  full   | 1658   | No  | NA    | 0  | 1  | Low-quality    | Genome-fragment | 3.09 | 0     | 0 |
| S5_vs_k141_136259  full   | 1658   | No  | NA    | 1  | 0  | Low-quality    | Genome-fragment | 3.36 | 0     | 0 |
| S7_vs_88036  H2gene       | 1658   | No  | NA    | 1  | 0  | Low-quality    | Genome-fragment | 3.88 | 0     | 0 |
| S16_extracted_67944       | 1658   | No  | NA    | 1  | 0  | Low-quality    | Genome-fragment | 4.05 | 0     | 0 |
| S16_extracted_75323       | 1658   | No  | NA    | 0  | 0  | Low-quality    | Genome-fragment | 3.61 | 0     | 0 |
| S10_extracted_22138       | 1658   | No  | NA    | 0  | 0  | Low-quality    | Genome-fragment | 3.87 | 0     | 0 |
| S12_vs_k141_13121  full   | 1658   | No  | NA    | 1  | 0  | Low-quality    | Genome-fragment | 3.3  | 0     | 0 |
| S3_vs_k141_25421  full    | 2784   | No  | NA    | 0  | 1  | Not-determined | Genome-fragment | NA   | 0     | 0 |
| S3_vs_k141_113172  full   | 4067   | No  | NA    | 0  | 1  | Not-determined | Genome-fragment | NA   | 2.81  | 0 |
| S17_vs_k141_166400  full  | 1659   | No  | NA    | 0  | 0  | Low-quality    | Genome-fragment | NA   | 0     | 0 |
| S11_extracted_k141_32296  | 1659   | No  | NA    | 0  | 0  | Low-quality    | Genome-fragment | 4.43 | 0     | 0 |
| S11_vs_k141_100396  full  | 1659   | No  | NA    | 1  | 0  | Low-quality    | Genome-fragment | 2.43 | 0     | 0 |
| S13_extracted_49286       | 1659   | No  | NA    | 1  | 0  | Low-quality    | Genome-fragment | 2.63 | 0     | 0 |
| S3_vs_k141_96977  full    | 1659   | No  | NA    | 1  | 0  | Low-quality    | Genome-fragment | NA   | 4.85  | 0 |
| S3_vs_k141_61589  full    | 3874   | No  | NA    | 0  | 2  | Not-determined | Genome-fragment | NA   | 0     | 0 |
| S5_extracted_k141_64626   | 1659   | No  | NA    | 0  | 0  | Low-quality    | Genome-fragment | NA   | 4.85  | 0 |
| S5_vs_k141_10944  full    | 1659   | No  | NA    | 0  | 1  | Low-quality    | Genome-fragment | 3.79 | 0     | 0 |
| S5_vs_k141_44645  H2gene  | 1659   | No  | NA    | 2  | 0  | Low-quality    | Genome-fragment | 4.85 | 0     | 0 |
| S16_vs_10496  full        | 1659   | No  | NA    | 0  | 2  | Not-determined | Genome-fragment | NA   | 3.22  | 0 |
| S3_vs_k141_10415  full    | 1679   | No  | NA    | 0  | 2  | Not-determined | Genome-fragment | NA   | 0     | 0 |
| S3_vs_k141_49990  full    | 2633   | No  | NA    | 0  | 0  | Not-determined | Genome-fragment | NA   | 0     | 0 |
| S12_vs_k141_145110  full  | 1659   | No  | NA    | 0  | 2  | Low-quality    | Genome-fragment | NA   | 1.12  | 0 |
| S3_vs_k141_1830  full     | 4011   | No  | NA    | 0  | 1  | Not-determined | Genome-fragment | NA   | 4.09  | 0 |
| S8_vs_k141_165501  full   | 1659   | No  | NA    | 3  | 0  | Low-quality    | Genome-fragment | NA   | 3.32  | 0 |
| S11_extracted_k141_129717 | 1660   | No  | NA    | 0  | 0  | Low-quality    | Genome-fragment | NA   | 0     | 0 |
| S3_vs_k141_50023  full    | 6264   | No  | NA    | 0  | 0  | Not-determined | Genome-fragment | NA   | 0     | 0 |
| S3_vs_k141_1853  full     | 4585   | No  | NA    | 0  | 0  | Not-determined | Genome-fragment | NA   | 0     | 0 |
| S3_vs_k141_50291  full    | 1660   | No  | NA    | 0  | 0  | Low-quality    | Genome-fragment | NA   | 3.72  | 0 |
| S1_vs_k141_57307  full    | 1660   | No  | NA    | 0  | 0  | Low-quality    | Genome-fragment | NA   | 3.34  | 0 |
| S5_extracted_k141_23336   | 1660   | No  | NA    | 0  | 2  | Low-quality    | Genome-fragment | 2.1  | 0     | 0 |
| S3_vs_k141_10514  full    | 2786   | No  | NA    | 0  | 2  | Not-determined | Genome-fragment | NA   | 0     | 0 |
| S2_vs_k141_50079  full    | 1406   | No  | NA    | 0  | 2  | Not-determined | Genome-fragment | NA   | 0.79  | 0 |
| S5_vs_k141_63667  full    | 1660   | No  | NA    | 0  | 0  | Low-quality    | Genome-fragment | NA   | 3.83  | 0 |
| S3_vs_k141_89411  full    | 2142   | No  | NA    | 0  | 1  | Not-determined | Genome-fragment | NA   | 2.44  | 0 |
| S5_vs_k141_63626  full    | 1660   | No  | NA    | 1  | 0  | Low-quality    | Genome-fragment | NA   | 3.96  | 0 |
| S7_vs_72467  H2gene       | 1660   | No  | NA    | 0  | 0  | Low-quality    | Genome-fragment | NA   | 3.96  | 0 |
| S7_vs_91935  H2gene       | 1660   | No  | NA    | 0  | 0  | Low-quality    | Genome-fragment | NA   | 2.88  | 0 |
| S3_vs_k141_41774  full    | 2165   | No  | NA    | 0  | 2  | Not-determined | Genome-fragment | NA   | 0     | 0 |
| S3_vs_k141_25612  full    | 2159   | No  | NA    | 0  | 1  | Not-determined | Genome-fragment | NA   | 0     | 0 |
| S3_vs_k141_81710  full    | 2931   | No  | NA    | 0  | 0  | Not-determined | Genome-fragment | NA   | 0     | 0 |
| S16_vs_28848  full        | 1660   | No  | NA    | 1  | 0  | Low-quality    | Genome-fragment | 3.04 | 0     | 0 |
| S3_vs_k141_25626  full    | 3436   | No  | NA    | 0  | 1  | Not-determined | Genome-fragment | NA   | 0     | 0 |
| S3_vs_k141_50099  full    | 3217   | No  | NA    | 0  | 4  | Not-determined | Genome-fragment | NA   | 0.99  | 0 |
| S16_vs_120363  full       | 1660   | No  | NA    | 0  | 2  | Low-quality    | Genome-fragment | NA   | 4.18  | 0 |
| S17_extracted_k141_106024 | 1661   | No  | NA    | 0  | 0  | Low-quality    | Genome-fragment | NA   | 0     | 0 |
| S3_vs_k141_105340  full   | 2814   | No  | NA    | 0  | 1  | Not-determined | Genome-fragment | NA   | 0     | 0 |
| S3_vs_k141_105354  full   | 1008   | No  | NA    | 0  | 0  | Not-determined | Genome-fragment | NA   | 0     | 0 |
| S3_vs_k141_89539  full    | 2938   | No  | NA    | 0  | 0  | Not-determined | Genome-fragment | NA   | 1.99  | 0 |
| S17_vs_k141_61694  full   | 1661   | No  | NA    | 0  | 0  | Low-quality    | Genome-fragment | NA   | 2.81  | 0 |
| S14_extracted_k141_83727  | 1661   | No  | NA    | 0  | 1  | Low-quality    | Genome-fragment | NA   | 1.98  | 0 |
| S14_vs_k141_98677  full   | 1661   | No  | NA    | 0  | 0  | Low-quality    | Genome-fragment | NA   | 3.96  | 0 |
| S5_vs_k141_48655  full    | 1661   | No  | NA    | 0  | 0  | Low-quality    | Genome-fragment | NA   | 3.17  | 0 |
| S3_vs_k141_105410  full   | 1760   | No  | NA    | 0  | 1  | Low-quality    | Genome-fragment | NA   | 3.91  | 0 |
| S7_extracted_68282        | 1661   | No  | NA    | 0  | 4  | Not-determined | Genome-fragment | NA   | 5.93  | 0 |
| S3_vs_k141_50120  full    | 7710   | No  | NA    | 0  | 0  | Low-quality    | Genome-fragment | NA   | 2.88  | 0 |
| S16_vs_89031  full        | 1661   | No  | NA    | 1  | 0  | Low-quality    | Genome-fragment | NA   | 0     | 0 |
| S12_extracted_k141_94646  | 1661   | No  | NA    | 2  | 0  | Low-quality    | Genome-fragment | NA   | 0     | 0 |
| S2_vs_k141_71651  full    | 5302   | No  | NA    | 0  | 3  | Not-determined | Genome-fragment | NA   | 0     | 0 |
| S2_vs_k141_89581  full    | 5751   | No  | NA    | 0  | 2  | Not-determined | Genome-fragment | NA   | 0     | 0 |
| S3_vs_k141_50135  full    | 1313   | No  | NA    | 0  | 0  | Not-determined | Genome-fragment | NA   | 3.84  | 0 |
| S3_vs_k141_10800  full    | 2493   | No  | NA    | 0  | 0  | Low-quality    | Genome-fragment | NA   | 2.06  | 0 |
| S8_extracted_k141_17038   | 1661   | No  | NA    | 0  | 0  | Low-quality    | Genome-fragment | NA   | 4.07  | 0 |
| S17_vs_k141_167712  full  | 1662   | No  | NA    | 0  | 0  | Low-quality    | Genome-fragment | NA   | 0     | 0 |
| S9_vs_k141_6788  full     | 1662   | No  | NA    | 0  | 2  | Not-determined | Genome-fragment | NA   | 0     | 0 |
| S3_vs_k141_27631  full    | 4676   | No  | NA    | 0  | 1  | Not-determined | Genome-fragment | NA   | 0     | 0 |
| S3_vs_k141_57932  full    | 2377   | No  | NA    | 0  | 4  | Not-determined | Genome-fragment | NA   | 2.96  | 0 |
| S3_vs_k141_10914  full    | 3417   | No  | NA    | 0  | 0  | Low-quality    | Genome-fragment | NA   | 3.26  | 0 |
| S9_vs_k141_14562  full    | 1662   | No  | NA    | 0  | 2  | Low-quality    | Genome-fragment | NA   | 0     | 0 |
| S9_extracted_k141_64493   | 1662   | No  | NA    | 0  | 0  | Low-quality    | Genome-fragment | NA   | 3.33  | 0 |
| S3_vs_k141_69844  full    | 1662   | No  | NA    | 0  | 1  | Not-determined | Genome-fragment | NA   | 1.47  | 0 |
| S3_vs_k141_2436  full     | 1225   | No  | NA    | 2  | 0  | Low-quality    | Genome-fragment | NA   | 3.05  | 0 |
| S5_vs_k141_64011  full    | 1662   | No  | NA    | 0  | 2  | Not-determined | Genome-fragment | NA   | 0     | 0 |
| S7_vs_19748  full         | 1662   | No  | NA    | 0  | 0  | Low-quality    | Genome-fragment | NA   | 0     | 0 |
| S1_vs_k141_25864  full    | 4853   | No  | NA    | 0  | 2  | Not-determined | Genome-fragment | NA   | 0     | 0 |
| S10_vs_88354  full        | 1662   | No  | NA    | 0  | 0  | Low-quality    | Genome-fragment | NA   | 1.28  | 0 |
| S3_vs_k141_97749  full    | 3834   | No  | NA    | 0  | 1  | Not-determined | Genome-fragment | NA   | 0.8   | 0 |
| S3_vs_k141_89706  full    | 2804   | No  | NA    | 0  | 1  | Not-determined | Genome-fragment | NA   | 0.93  | 0 |
| S11_vs_k141_44323  full   | 1663   | No  | NA    | 0  | 0  | Low-quality    | Genome-fragment | NA   | 0     | 0 |
| S14_extracted_k141_15683  |        |     |       |    |    |                |                 |      |       |   |



|                             |       |     |       |    |                |                 |                 |       |       |
|-----------------------------|-------|-----|-------|----|----------------|-----------------|-----------------|-------|-------|
| S3_vs_k141_50459[ full      | 2417  | No  | NA    | 0  | 2              | Not-determined  | Genome-fragment | NA    | 0     |
| S7_extracted_43168          | 1665  | No  | NA    | 0  | 0              | Low-quality     | Genome-fragment | 2.76  | 0     |
| S16_vs_159828[ l 2gene      | 1665  | No  | NA    | 1  | 0              | Low-quality     | Genome-fragment | 4.74  | 0     |
| S15_vs_12437[ full          | 1665  | No  | NA    | 0  | 1              | Low-quality     | Genome-fragment | 1.19  | 0     |
| S3_vs_k141_105863[ full     | 1004  | No  | NA    | 0  | 0              | Not-determined  | Genome-fragment | NA    | 0     |
| S15_vs_45631[ full          | 1665  | No  | NA    | 0  | 0              | Low-quality     | Genome-fragment | 2.71  | 0     |
| S3_vs_k141_65941[ full      | 1475  | No  | NA    | 0  | 1              | Not-determined  | Genome-fragment | NA    | 0     |
| S6_vs_k141_3859[ full       | 1665  | No  | NA    | 3  | 0              | Low-quality     | Genome-fragment | 3.52  | 0     |
| S3_vs_k141_74507[ full      | 1024  | No  | NA    | 1  | Not-determined | Genome-fragment | NA              | 0     |       |
| S3_vs_k141_113837[ full     | 2076  | No  | NA    | 0  | 2              | Not-determined  | Genome-fragment | NA    | 0     |
| S8_vs_k141_183466[ full     | 1665  | No  | NA    | 0  | 0              | Low-quality     | Genome-fragment | 6.62  | 0     |
| S8_vs_k141_164834[ full     | 1665  | No  | NA    | 0  | 2              | Low-quality     | Genome-fragment | 1.07  | 0     |
| S3_vs_k141_81928[ full      | 2258  | No  | NA    | 0  | 1              | Not-determined  | Genome-fragment | NA    | 0     |
| S3_vs_k141_121650[ full     | 1701  | No  | NA    | 0  | 1              | Not-determined  | Genome-fragment | NA    | 0     |
| S5_extracted_k141_44801     | 1666  | No  | NA    | 1  | 0              | Low-quality     | Genome-fragment | 7.59  | 0     |
| S7_vs_88536[ full           | 1666  | No  | NA    | 3  | 0              | Low-quality     | Genome-fragment | 3.88  | 0     |
| S3_vs_k141_89898[ full      | 47278 | No  | NA    | 7  | 1              | High-quality    | Genome-fragment | 100   | 0     |
| S10_vs_101522[ full         | 1666  | No  | NA    | 0  | 0              | Low-quality     | Genome-fragment | 1.87  | 0     |
| S12_vs_k141_127288[ full    | 1666  | No  | NA    | 0  | 0              | Low-quality     | Genome-fragment | 3.74  | 0     |
| S3_vs_k141_97913[ full      | 10067 | No  | NA    | 0  | 6              | Not-determined  | Genome-fragment | NA    | 0     |
| S3_vs_k141_50522[ full      | 4094  | No  | NA    | 0  | 1              | Not-determined  | Genome-fragment | NA    | 0     |
| S3_vs_k141_42283[ full      | 2864  | No  | NA    | 0  | 1              | Not-determined  | Genome-fragment | NA    | 0     |
| S12_vs_k141_128161[ l 2gene | 1666  | No  | NA    | 1  | 0              | Low-quality     | Genome-fragment | 3.51  | 0     |
| S8_vs_k141_26498[ full      | 1666  | No  | NA    | 1  | 0              | Low-quality     | Genome-fragment | 4.03  | 0     |
| S3_vs_k141_89977[ full      | 1662  | No  | NA    | 0  | 0              | Not-determined  | Genome-fragment | NA    | 0     |
| S17_extracted_k141_67876    | 1667  | No  | NA    | 3  | 0              | Low-quality     | Genome-fragment | 7.87  | 0     |
| S14_extracted_k141_53863    | 1667  | No  | NA    | 0  | 0              | Low-quality     | Genome-fragment | 3.39  | 0     |
| S3_vs_k141_96742[ full      | 1667  | No  | NA    | 0  | 1              | Low-quality     | Genome-fragment | 3.55  | 0     |
| S3_vs_k141_98550[ full      | 1667  | No  | NA    | 0  | 0              | Low-quality     | Genome-fragment | 2.58  | 0     |
| S3_vs_k141_105984[ full     | 1357  | No  | NA    | 0  | 0              | Not-determined  | Genome-fragment | NA    | 0     |
| S5_vs_k141_79094[ full      | 1667  | No  | NA    | 0  | 1              | Low-quality     | Genome-fragment | 0.98  | 0     |
| S3_vs_k141_50557[ full      | 4208  | No  | NA    | 22 | 0              | High-quality    | Genome-fragment | 99.78 | 0     |
| S3_vs_k141_42355[ full      | 3412  | No  | NA    | 0  | 1              | Not-determined  | Genome-fragment | NA    | 0     |
| S3_vs_k141_74657[ full      | 8034  | No  | NA    | 0  | 2              | Not-determined  | Genome-fragment | NA    | 0     |
| S3_vs_k141_50562[ full      | 1682  | No  | NA    | 0  | 1              | Not-determined  | Genome-fragment | NA    | 0     |
| S3_vs_k141_50232[ full      | 4072  | No  | NA    | 0  | 1              | Not-determined  | Genome-fragment | NA    | 0     |
| S3_vs_k141_114965[ full     | 1667  | No  | NA    | 0  | 0              | Low-quality     | Genome-fragment | 4.24  | 0     |
| S3_vs_k141_114021[ full     | 1283  | No  | NA    | 0  | 0              | Not-determined  | Genome-fragment | NA    | 0     |
| S7_extracted_58605          | 1667  | No  | NA    | 0  | 0              | Low-quality     | Genome-fragment | 5.5   | 0     |
| S8_extracted_k141_103670    | 1667  | No  | NA    | 4  | 0              | Low-quality     | Genome-fragment | 5.46  | 0     |
| S3_vs_k141_50630[ full      | 4907  | No  | NA    | 0  | 0              | Not-determined  | Genome-fragment | NA    | 0     |
| S3_vs_k141_74684[ full      | 1615  | No  | NA    | 0  | 2              | Not-determined  | Genome-fragment | NA    | 0     |
| S9_extracted_k141_43167     | 1668  | No  | NA    | 3  | 0              | Low-quality     | Genome-fragment | 2.78  | 0     |
| S3_vs_k141_17876[ full      | 2767  | No  | NA    | 0  | 2              | Not-determined  | Genome-fragment | NA    | 0     |
| S3_vs_k141_50650[ full      | 3392  | No  | NA    | 0  | 3              | Not-determined  | Genome-fragment | NA    | 0     |
| S9_vs_k141_62886[ full      | 1668  | No  | NA    | 0  | 0              | Low-quality     | Genome-fragment | 3.18  | 0     |
| S3_vs_k141_50660[ full      | 2292  | No  | NA    | 0  | 2              | Not-determined  | Genome-fragment | NA    | 0     |
| S9_vs_k141_36357[ l 2gene   | 1668  | No  | NA    | 2  | 0              | Low-quality     | Genome-fragment | 4.32  | 0     |
| S14_extracted_k141_30955    | 1668  | No  | NA    | 0  | 0              | Low-quality     | Genome-fragment | 3.62  | 0     |
| S3_vs_k141_82173[ full      | 2150  | No  | NA    | 0  | 0              | Not-determined  | Genome-fragment | NA    | 0     |
| S3_vs_k141_82190[ full      | 2154  | No  | NA    | 0  | 2              | Not-determined  | Genome-fragment | NA    | 0     |
| S2_vs_k141_54823[ full      | 1668  | No  | NA    | 0  | 0              | Not-determined  | Genome-fragment | 0.99  | 0     |
| S16_extracted_100444        | 1668  | No  | NA    | 0  | 1              | Low-quality     | Genome-fragment | 0.16  | 0     |
| S3_vs_k141_58090[ full      | 1341  | No  | NA    | 0  | 1              | Not-determined  | Genome-fragment | NA    | 0     |
| S12_extracted_k141_126490   | 1668  | No  | NA    | 0  | 0              | Low-quality     | Genome-fragment | 3.28  | 0     |
| S2_vs_k141_20881[ full      | 1668  | No  | NA    | 0  | 0              | Low-quality     | Genome-fragment | 3.77  | 0     |
| S3_vs_k141_98102[ full      | 1414  | No  | NA    | 0  | 0              | Not-determined  | Genome-fragment | NA    | 0     |
| S6_vs_k141_11784[ full      | 1668  | Yes | 968   | 1  | 1              | Low-quality     | Genome-fragment | 0.42  | 41.97 |
| S3_vs_k141_114081[ full     | 1242  | No  | NA    | 0  | 0              | Not-determined  | Genome-fragment | NA    | 0     |
| S8_vs_k141_38509[ full      | 1668  | No  | NA    | 0  | 0              | Low-quality     | Genome-fragment | 4.67  | 0     |
| S3_vs_k141_42535[ full      | 1811  | No  | NA    | 0  | 0              | Not-determined  | Genome-fragment | NA    | 0     |
| S3_vs_k141_58519[ full      | 1229  | No  | NA    | 0  | 0              | Not-determined  | Genome-fragment | NA    | 0     |
| S9_extracted_k141_87932     | 1669  | No  | NA    | 0  | 1              | Low-quality     | Genome-fragment | 0.45  | 0     |
| S7_extracted_114845         | 1669  | No  | NA    | 2  | 0              | Low-quality     | Genome-fragment | 4.43  | 0     |
| S7_vs_89818[ full           | 1669  | No  | NA    | 0  | 0              | Low-quality     | Genome-fragment | 3.43  | 0     |
| S16_extracted_31314         | 1669  | No  | NA    | 0  | 1              | Low-quality     | Genome-fragment | 2.62  | 0     |
| S16_extracted_52638         | 1669  | No  | NA    | 1  | 0              | Low-quality     | Genome-fragment | 2.78  | 0     |
| S16_vs_38393[ full          | 1669  | No  | NA    | 0  | 0              | Low-quality     | Genome-fragment | 3.49  | 0     |
| S3_vs_k141_58601[ full      | 1350  | No  | NA    | 0  | 2              | Not-determined  | Genome-fragment | NA    | 0     |
| S3_vs_k141_98185[ full      | 1460  | No  | NA    | 0  | 0              | Not-determined  | Genome-fragment | NA    | 0     |
| S12_extracted_k141_34932    | 1669  | No  | NA    | 1  | 0              | Low-quality     | Genome-fragment | 3.6   | 0     |
| S12_vs_k141_159792[ full    | 1669  | No  | NA    | 0  | 0              | Low-quality     | Genome-fragment | 3.31  | 0     |
| S3_vs_k141_58616[ full      | 6014  | No  | NA    | 0  | 3              | Not-determined  | Genome-fragment | NA    | 0     |
| S3_vs_k141_26427[ full      | 4851  | No  | NA    | 0  | 2              | Not-determined  | Genome-fragment | NA    | 0     |
| S12_vs_k141_50636[ full     | 1669  | No  | NA    | 0  | 0              | Low-quality     | Genome-fragment | 3.64  | 0     |
| S3_vs_k141_58644[ full      | 1734  | No  | NA    | 0  | 0              | Not-determined  | Genome-fragment | NA    | 0     |
| S3_vs_k141_98202[ full      | 13455 | No  | NA    | 0  | 2              | Not-determined  | Genome-fragment | NA    | 0     |
| S12_vs_k141_46261[ full     | 1669  | No  | NA    | 0  | 0              | Low-quality     | Genome-fragment | 3.9   | 0     |
| S2_extracted_k141_8859      | 1669  | No  | NA    | 0  | 0              | Low-quality     | Genome-fragment | 5.39  | 0     |
| S3_vs_k141_82324[ full      | 5132  | No  | NA    | 0  | 1              | Not-determined  | Genome-fragment | NA    | 0     |
| S3_vs_k141_106180[ full     | 2129  | No  | NA    | 0  | 0              | Not-determined  | Genome-fragment | NA    | 0     |
| S4_extracted_18099          | 1669  | No  | NA    | 0  | 0              | Low-quality     | Genome-fragment | 4.18  | 0     |
| S3_vs_k141_2565[ full       | 1966  | No  | NA    | 0  | 1              | Not-determined  | Genome-fragment | NA    | 0     |
| S3_vs_k141_74845[ full      | 1699  | No  | NA    | 0  | 1              | Not-determined  | Genome-fragment | NA    | 0     |
| S3_vs_k141_212821[ full     | 1226  | No  | NA    | 0  | 0              | Not-determined  | Genome-fragment | NA    | 0     |
| S3_vs_k141_42569[ full      | 67795 | Yes | 55470 | 21 | 11             | High-quality    | High-quality    | 100   | 18.18 |
| S3_vs_k141_42576[ full      | 5532  | No  | NA    | 0  | 2              | Not-determined  | Genome-fragment | NA    | 0     |
| S3_vs_k141_26472[ full      | 4053  | No  | NA    | 0  | 3              | Not-determined  | Genome-fragment | NA    | 0     |
| S8_vs_k141_7874[ full       | 1669  | No  | NA    | 0  | 0              | Low-quality     | Genome-fragment | 2.07  | 0     |
| S8_vs_k141_94294[ full      | 1669  | No  | NA    | 0  | 3              | Low-quality     | Genome-fragment | 1.9   | 0     |
| S14_vs_k141_14053[ full     | 1670  | No  | NA    | 1  | 0              | Low-quality     | Genome-fragment | 2.56  | 0     |
| S3_vs_k141_74869[ full      | 1200  | No  | NA    | 0  | 1              | Not-determined  | Genome-fragment | NA    | 0     |
| S3_vs_k141_98290[ full      | 2861  | No  | NA    | 0  | 0              | Not-determined  | Genome-fragment | NA    | 0     |
| S1_extracted_k141_159309    | 1670  | No  | NA    | 1  | 0              | Low-quality     | Genome-fragment | 0.11  | 0     |
| S3_vs_k141_82363[ full      | 1220  | No  | NA    | 0  | 2              | Not-determined  | Genome-fragment | NA    | 0     |
| S3_vs_k141_66062[ full      | 1808  | No  | NA    | 0  | 1              | Not-determined  | Genome-fragment | NA    | 0     |
| S3_vs_k141_114204[ full     | 1597  | No  | NA    | 0  | 0              | Not-determined  | Genome-fragment | NA    | 0     |
| S3_vs_k141_58796[ full      | 1687  | No  | NA    | 0  | 1              | Not-determined  | Genome-fragment | NA    | 0     |
| S1_vs_k141_68466[ full      | 1670  | No  | NA    | 0  | 0              | Low-quality     | Genome-fragment | 2.78  | 0     |
| S3_vs_k141_72750[ full      | 1670  | No  | NA    | 0  | 0              | Low-quality     | Genome-fragment | 1.07  | 0     |
| S3_vs_k141_42668[ full      | 3592  | No  | NA    | 0  | 2              | Not-determined  | Genome-fragment | NA    | 0     |
| S16_vs_40057[ full          | 1670  | No  | NA    | 0  | 0              | Low-quality     | Genome-fragment | 3.86  | 0     |
| S16_vs_40944[ full          | 1670  | No  | NA    | 2  | 0              | Low-quality     | Genome-fragment | 2.97  | 0     |
| S16_vs_46149[ full          | 1670  | No  | NA    | 0  | 0              | Low-quality     | Genome-fragment | 3.62  | 0     |
| S14_vs_k141_41248[ full     | 1671  | No  | NA    | 0  | 1              | Low-quality     | Genome-fragment | 0.49  | 0     |
| S3_vs_k141_34799[ full      | 2386  | No  | NA    | 0  | 1              | Not-determined  | Genome-fragment | NA    | 0     |
| S1_vs_k141_156592[ l 2gene  | 1671  | No  | NA    | 1  | 0              | Low-quality     | Genome-fragment | 4.25  | 0     |
| S3_vs_k141_58829[ full      | 1043  | No  | NA    | 0  | 0              | Not-determined  | Genome-fragment | NA    | 0     |
| S3_vs_k141_68445[ full      | 1671  | No  | NA    | 0  | 0              | Low-quality     | Genome-fragment | 0.9   | 0     |
| S5_vs_k141_83106[ full      | 1671  | No  | NA    | 0  | 0              | Low-quality     | Genome-fragment | 1.59  | 0     |
| S7_vs_104825[ full          | 1671  | No  | NA    | 0  | 0              | Low-quality     | Genome-fragment | 3.29  | 0     |
| S16_vs_20641[ full          | 1671  | No  | NA    | 0  | 0              | Low-quality     | Genome-fragment | 4.02  | 0     |
| S3_vs_k141_42767[ full      | 3197  | No  | NA    | 0  | 3              | Not-determined  | Genome-fragment | NA    | 0     |
| S3_vs_k141_106343[ full     | 5244  | No  | NA    | 0  | 4              | Not-determined  | Genome-fragment | NA    | 0     |
| S12_vs_k141_157489[ full    | 1671  | No  | NA    | 0  | 0              | Low-quality     | Genome-fragment | 2.87  | 0     |
| S6_vs_k141_9905[ full       | 1671  | No  | NA    | 0  | 2              | Low-quality     | Genome-fragment | 2.8   | 0     |
| S14_extracted_k141_29425    | 1672  | No  | NA    | 3  | 0              | Low-quality     | Genome-fragment | 5.51  | 0     |
| S3_vs_k141_11471[ full      | 28459 | No  | NA    | 16 | 0              | Medium-quality  | Genome-fragment | 88.52 | 0     |
| NC3_vs_k141_1019            | 1672  | No  | NA    | 0  | 0              | Low-quality     | Genome-fragment | 2.39  | 0     |
| S16_extracted_104366        | 1672  | No  | NA    | 1  | 0              | Low-quality     | Genome-fragment | 4.28  | 0     |
| S16_vs_95939[ l 2gene       | 1672  | No  | NA    | 1  | 0              | Low-quality     | Genome-fragment | 4.79  | 0     |
| S10_extracted_44560         | 1672  | No  | NA    | 0  | 0              | Low-quality     | Genome-fragment | 5.57  | 0     |
| S3_vs_k141_50937[ full      | 2784  | No  | NA    | 0  | 3              | Not-determined  | Genome-fragment | NA    | 0     |
| S10_vs_13156[ l 2gene       | 1672  | No  | NA    | 0  | 0              | Low-quality     | Genome-fragment | 4.26  | 0     |
| S15_extracted_69936         | 1672  | No  | NA    | 0  | 0              | Low-quality     | Genome-fragment | 0.76  | 0     |
| S17_vs_k141_72046[ full     | 1673  | No  | NA    | 1  | 0              | Low-quality     | Genome-fragment | 1.78  | 0     |
| S14_vs_k141_36475[ full     | 1673  | No  | NA    | 0  | 1              | Low-quality     | Genome-fragment | 2.29  | 0     |
| S3_extracted_k141_82823     | 1673  | No  | NA    | 2  | 0              | Low-quality     | Genome-fragment | 4.07  | 0     |
| S3_vs_k141_96479[ full      | 1673  | No  | NA    | 0  | 1              | Low-quality     | Genome-fragment | 2.87  | 0     |
| S7_vs_30441[ full           | 1673  | No  | NA    | 0  | 0              | Low-quality     | Genome-fragment | 3.86  | 0     |
| S7_vs_19542[ full           | 1673  | No  | NA    | 2  | 0              | Low-quality     | Genome-fragment | 2.12  | 0     |
| S7_vs_54964[ full           | 1673  | No  | NA    | 0  | 1              | Low-quality     | Genome-fragment | 1.23  | 0     |
| S3_vs_k141_11996[ full      | 2802  | No  | NA    | 0  | 3              | Not-determined  | Genome-fragment | NA    | 0     |
| S16_vs_14314[ full          | 1673  | No  | NA    | 1  | 0              | Low-quality     | Genome-fragment | 3.68  | 0     |
| S8_extracted_k141_95131     | 1673  | No  | NA    | 0  | 0              | Low-quality     | Genome-fragment | 1.76  | 0     |
| S8_vs_k141_87021[ full      | 1673  | No  | NA    | 0  | 0              | Low-quality     | Genome-fragment | 3.22  | 0     |
| S8_vs_k141_140003[ full     | 1673  | No  | NA    | 0  | 0              | Low-quality     | Genome-fragment | 5.26  | 0     |
| S8_vs_k141_180023[ full     | 1673  | No  | NA    | 0  | 0              | Low-quality     | Genome-fragment | 1.15  | 0     |
| S14_vs_k141_86882[ full     | 1674  | No  | NA    | 0  | 0              | Low-quality     | Genome-fragment | 3.21  | 0     |
| S3_vs_k141_50999[ full      | 3196  | No  | NA    | 0  | 2              | Not-determined  | Genome-fragment | NA    | 0     |
| S7_vs_31051[ full           | 1674  | No  | NA    | 1  | 0              | Low-quality     | Genome-fragment | 1.2   | 0     |
| S7_vs_25811[ full           | 1674  | No  | NA    | 0  | 0              | Low-quality     | Genome-fragment | 3.49  | 0     |
| S3_vs_k141_51005[ full      | 2984  | No  | NA    | 3  | 0              | Medium-quality  | Genome-fragment | 62.43 | 0     |



|                           |       |     |    |      |   |                |                 |       |       |
|---------------------------|-------|-----|----|------|---|----------------|-----------------|-------|-------|
| S8_vs_k141_179337 full    | 1676  | No  | NA | 0    | 0 | Low-quality    | Genome-fragment | 3.33  | 0     |
| S13_vs_k141_107616 full   | 1677  | No  | NA | 1    | 1 | Low-quality    | Genome-fragment | 1.44  | 0     |
| S3_vs_k141_98608 full     | 4163  | No  | NA | 0    | 3 | Not-determined | Genome-fragment | NA    | 0     |
| S1_vs_k141_84724 full     | 1677  | No  | NA | 0    | 1 | Low-quality    | Genome-fragment | 1.3   | 0     |
| S3_vs_k141_114477 full    | 2554  | No  | NA | 0    | 1 | Not-determined | Genome-fragment | NA    | 0     |
| S3_vs_k141_17879 full     | 1677  | No  | NA | 0    | 1 | Low-quality    | Genome-fragment | 3.06  | 0     |
| S3_vs_k141_114500 full    | 1077  | No  | NA | 0    | 0 | Not-determined | Genome-fragment | NA    | 0     |
| S3_vs_k141_43080 full     | 2026  | No  | NA | 0    | 1 | Not-determined | Genome-fragment | NA    | 0     |
| S3_vs_k141_51625 H2gene   | 1677  | No  | NA | 0    | 0 | Low-quality    | Genome-fragment | 3.11  | 0     |
| S3_vs_k141_12219 full     | 8169  | No  | NA | 0    | 3 | Not-determined | Genome-fragment | NA    | 0     |
| S5_vs_k141_107781 full    | 1677  | No  | NA | 1    | 0 | Low-quality    | Genome-fragment | 2.25  | 0     |
| S7_vs_20569 full          | 1677  | No  | NA | 2    | 2 | Low-quality    | Genome-fragment | 0.86  | 0     |
| S3_vs_k141_35213 full     | 1608  | No  | NA | 0    | 2 | Not-determined | Genome-fragment | NA    | 0     |
| S3_vs_k141_26941 full     | 8975  | No  | NA | 0    | 8 | Not-determined | Genome-fragment | NA    | 0     |
| S10_extracted_22545       | 1677  | No  | NA | 0    | 0 | Low-quality    | Genome-fragment | 1.08  | 0     |
| S6_extracted_k141_5356    | 1677  | No  | NA | 0    | 0 | Low-quality    | Genome-fragment | 3.16  | 0     |
| S7_vs_k141_144280 full    | 1678  | No  | NA | 0    | 0 | Low-quality    | Genome-fragment | 4.79  | 0     |
| S3_vs_k141_59188 full     | 2751  | No  | NA | 0    | 0 | Not-determined | Genome-fragment | NA    | 2.8   |
| S9_extracted_k141_22235   | 1678  | No  | NA | 0    | 0 | Low-quality    | Genome-fragment | 2.89  | 0     |
| S14_vs_k141_37445 full    | 1678  | No  | NA | 0    | 0 | Low-quality    | Genome-fragment | NA    | 0     |
| S3_vs_k141_66362 full     | 5095  | No  | NA | 0    | 2 | Not-determined | Genome-fragment | NA    | 0     |
| S3_vs_k141_66367 full     | 2450  | No  | NA | 0    | 1 | Not-determined | Genome-fragment | NA    | 0     |
| S14_vs_k141_113670 full   | 1678  | No  | NA | 2    | 0 | Low-quality    | Genome-fragment | 4.06  | 0     |
| S3_vs_k141_126991 full    | 1678  | No  | NA | 0    | 1 | Low-quality    | Genome-fragment | 0.84  | 0     |
| S3_vs_k141_66375 full     | 1449  | No  | NA | 0    | 2 | Not-determined | Genome-fragment | NA    | 0     |
| S3_vs_k141_50742 full     | 3744  | No  | NA | 0    | 2 | Not-determined | Genome-fragment | NA    | 0     |
| S5_vs_k141_55564 full     | 1678  | No  | NA | 0    | 0 | Low-quality    | Genome-fragment | 3.22  | 0     |
| S5_vs_k141_20709 full     | 1678  | No  | NA | 4    | 0 | Low-quality    | Genome-fragment | 2.77  | 0     |
| S3_vs_k141_114623 full    | 1774  | No  | NA | 3    | 3 | Not-determined | Genome-fragment | NA    | 0     |
| S7_vs_37611 full          | 1678  | No  | NA | 1    | 0 | Low-quality    | Genome-fragment | 1.13  | 0     |
| S3_vs_k141_18292 full     | 1448  | No  | NA | 0    | 0 | Not-determined | Genome-fragment | NA    | 0     |
| S3_vs_k141_83185 full     | 1954  | No  | NA | 0    | 0 | Not-determined | Genome-fragment | NA    | 0     |
| S7_vs_19316 full          | 1678  | No  | NA | 0    | 0 | Low-quality    | Genome-fragment | 4.32  | 0     |
| S3_vs_k141_114652 full    | 1745  | No  | NA | 0    | 1 | Not-determined | Genome-fragment | NA    | 0     |
| S3_vs_k141_19312 full     | 2109  | No  | NA | 0    | 2 | Not-determined | Genome-fragment | NA    | 0     |
| S16_extracted_154219      | 1678  | No  | NA | 0    | 0 | Low-quality    | Genome-fragment | 3.34  | 0     |
| S3_vs_k141_59362 full     | 5066  | No  | NA | 0    | 0 | Not-determined | Genome-fragment | NA    | 0     |
| S12_vs_k141_98797 full    | 1678  | No  | NA | 0    | 1 | Low-quality    | Genome-fragment | 1.07  | 0     |
| S3_vs_k141_76555 full     | 1458  | No  | NA | 0    | 0 | Not-determined | Genome-fragment | NA    | 0     |
| S3_vs_k141_18317 full     | 3829  | No  | NA | 0    | 3 | Not-determined | Genome-fragment | NA    | 0     |
| S3_vs_k141_50819 full     | 5571  | No  | NA | 0    | 0 | Not-determined | Genome-fragment | NA    | 0     |
| S6_vs_k141_14281 full     | 1678  | No  | NA | 0    | 0 | Low-quality    | Genome-fragment | 3.91  | 0     |
| S3_vs_k141_122242 full    | 8434  | No  | NA | 0    | 4 | Not-determined | Genome-fragment | NA    | 0     |
| S17_vs_k141_172195 full   | 1679  | No  | NA | 0    | 0 | Low-quality    | Genome-fragment | 0.85  | 0     |
| S11_vs_k141_68418 full    | 1679  | No  | NA | 2    | 0 | Low-quality    | Genome-fragment | 3.65  | 0     |
| S3_vs_k141_75716 full     | 4613  | No  | NA | 3    | 3 | Not-determined | Genome-fragment | NA    | 0     |
| S3_vs_k141_75786 full     | 1786  | No  | NA | 0    | 1 | Not-determined | Genome-fragment | NA    | 0     |
| S14_vs_k141_72522 H2gene  | 1679  | No  | NA | 1    | 0 | Low-quality    | Genome-fragment | 2.45  | 0     |
| S3_vs_k141_58866 full     | 3373  | No  | NA | 1    | 1 | Not-determined | Genome-fragment | NA    | 0     |
| S16_vs_69737 full         | 1679  | No  | NA | 2    | 1 | Low-quality    | Genome-fragment | 3.43  | 0     |
| S3_vs_k141_59440 full     | 11277 | No  | NA | 0    | 4 | Not-determined | Genome-fragment | NA    | 0     |
| S2_vs_k141_58876 full     | 11569 | No  | NA | 0    | 5 | Not-determined | Genome-fragment | NA    | 0     |
| S3_vs_k141_114781 full    | 5344  | No  | NA | 0    | 4 | Not-determined | Genome-fragment | NA    | 0     |
| S3_vs_k141_114789 full    | 2865  | No  | NA | 0    | 0 | Not-determined | Genome-fragment | NA    | 0     |
| S3_vs_k141_107075 full    | 1600  | No  | NA | 0    | 1 | Not-determined | Genome-fragment | NA    | 1.02  |
| S10_vs_59002 full         | 1679  | No  | NA | 0    | 0 | Low-quality    | Genome-fragment | 1.01  | 0     |
| S9_extracted_k141_70029   | 1680  | No  | NA | 1    | 0 | Low-quality    | Genome-fragment | NA    | 1.01  |
| S3_vs_k141_114803 full    | 3952  | No  | NA | 0    | 0 | Not-determined | Genome-fragment | NA    | 4.12  |
| S9_vs_k141_62547 full     | 1680  | No  | NA | 0    | 0 | Low-quality    | Genome-fragment | 4.1   | 0     |
| S11_vs_k141_68235 full    | 1680  | No  | NA | 0    | 0 | Low-quality    | Genome-fragment | NA    | 0     |
| S3_vs_k141_35620 full     | 1966  | No  | NA | 0    | 1 | Not-determined | Genome-fragment | NA    | 0     |
| S3_vs_k141_18559 full     | 2057  | No  | NA | 0    | 0 | Not-determined | Genome-fragment | NA    | 0     |
| S3_vs_k141_122343 full    | 6381  | No  | NA | 0    | 1 | Not-determined | Genome-fragment | NA    | 0     |
| S1_vs_k141_21482 full     | 1680  | No  | NA | 1    | 0 | Low-quality    | Genome-fragment | 4     | 0     |
| S3_vs_k141_59483 full     | 1480  | No  | NA | 0    | 0 | Not-determined | Genome-fragment | NA    | 0.93  |
| S3_vs_k141_73451 full     | 1680  | No  | NA | 1    | 0 | Low-quality    | Genome-fragment | 4.62  | 0     |
| S3_vs_k141_61599 full     | 1680  | No  | NA | 1    | 0 | Low-quality    | Genome-fragment | 3.57  | 0     |
| S7_extracted_49353        | 1680  | No  | NA | 1    | 0 | Not-determined | Genome-fragment | NA    | 4.16  |
| S3_vs_k141_114891 full    | 1864  | No  | NA | 1    | 0 | Low-quality    | Genome-fragment | NA    | 0.94  |
| S7_vs_13842 full          | 1680  | No  | NA | 1    | 0 | Low-quality    | Genome-fragment | 1.03  | 0     |
| S3_vs_k141_114899 full    | 2557  | No  | NA | 0    | 0 | Not-determined | Genome-fragment | NA    | 0.94  |
| S10_extracted_88202       | 1680  | No  | NA | 0    | 0 | Low-quality    | Genome-fragment | 1.03  | 0     |
| S8_vs_k141_74480 full     | 1680  | No  | NA | 1    | 0 | Low-quality    | Genome-fragment | NA    | 2.92  |
| S3_vs_k141_107162 full    | 2210  | No  | NA | 0    | 2 | Not-determined | Genome-fragment | NA    | 1.58  |
| S6_vs_k141_77038 full     | 1680  | No  | NA | 0    | 0 | Low-quality    | Genome-fragment | 0.97  | 0     |
| S17_vs_k141_104678 full   | 1681  | No  | NA | 1    | 0 | Low-quality    | Genome-fragment | 2.73  | 0     |
| S17_vs_k141_95055 full    | 1681  | No  | NA | 1    | 0 | Low-quality    | Genome-fragment | NA    | 0     |
| S9_vs_k141_54922 H2gene   | 1681  | No  | NA | 1    | 0 | Low-quality    | Genome-fragment | 2.74  | 0     |
| S3_vs_k141_75883 full     | 6607  | No  | NA | 0    | 3 | Not-determined | Genome-fragment | NA    | 4.67  |
| S3_vs_k141_18669 full     | 5282  | No  | NA | 0    | 3 | Not-determined | Genome-fragment | NA    | 0     |
| S9_vs_k141_14960 H2gene   | 1681  | No  | NA | 1    | 0 | Low-quality    | Genome-fragment | 2.74  | 0     |
| S16_vs_161446 full        | 1681  | No  | NA | 0    | 0 | Low-quality    | Genome-fragment | NA    | 4.27  |
| S3_vs_k141_51707 full     | 2093  | No  | NA | 0    | 1 | Not-determined | Genome-fragment | NA    | 2.28  |
| S10_vs_120250 full        | 1681  | No  | NA | 0    | 1 | Low-quality    | Genome-fragment | 3.07  | 0     |
| S8_extracted_k141_70627   | 1681  | No  | NA | 0    | 1 | Low-quality    | Genome-fragment | 5.37  | 0     |
| S17_vs_k141_171409 full   | 1682  | No  | NA | 0    | 2 | Low-quality    | Genome-fragment | 2.02  | 0     |
| S17_vs_k141_150872 full   | 1682  | No  | NA | 0    | 0 | Low-quality    | Genome-fragment | NA    | 0     |
| S5_vs_k141_12674 full     | 2193  | No  | NA | 0    | 2 | Not-determined | Genome-fragment | NA    | 0     |
| S3_vs_k141_66659 full     | 1452  | No  | NA | 0    | 0 | Not-determined | Genome-fragment | NA    | 3.59  |
| S5_vs_k141_132945 full    | 1682  | No  | NA | 3    | 0 | Low-quality    | Genome-fragment | 4.21  | 0     |
| S16_vs_75901 full         | 1682  | No  | NA | 1    | 0 | Low-quality    | Genome-fragment | NA    | 4.3   |
| S3_vs_k141_27403 full     | 2106  | No  | NA | 1    | 4 | Not-determined | Genome-fragment | NA    | 0     |
| S6_vs_k141_48232 full     | 1682  | No  | NA | 2    | 0 | Low-quality    | Genome-fragment | NA    | 0     |
| S8_vs_k141_123871 full    | 1682  | No  | NA | 2    | 0 | Low-quality    | Genome-fragment | NA    | 0     |
| S3_vs_k141_83349 full     | 4065  | No  | NA | 2    | 2 | Not-determined | Genome-fragment | NA    | 0     |
| S3_vs_k141_122575 full    | 1115  | No  | NA | 0    | 0 | Not-determined | Genome-fragment | NA    | 1.11  |
| S17_extracted_k141_131021 | 1683  | No  | NA | 0    | 2 | Low-quality    | Genome-fragment | NA    | 2.07  |
| S5_vs_k141_131056 full    | 1938  | No  | NA | 0    | 0 | Not-determined | Genome-fragment | NA    | 3.9   |
| S17_vs_k141_96137 full    | 1683  | No  | NA | 1    | 0 | Low-quality    | Genome-fragment | 5.04  | 0     |
| S17_vs_k141_131698 H2gene | 1683  | No  | NA | 1    | 0 | Low-quality    | Genome-fragment | 4.13  | 0     |
| S11_vs_k141_92544 full    | 1683  | No  | NA | 1    | 0 | Low-quality    | Genome-fragment | 2.01  | 0     |
| S11_vs_k141_44241 full    | 1683  | No  | NA | 0    | 0 | Not-determined | Genome-fragment | NA    | 0     |
| S14_vs_k141_33717 full    | 1683  | No  | NA | 0    | 1 | Low-quality    | Genome-fragment | NA    | 0     |
| S3_vs_k141_107311 full    | 2481  | No  | NA | 0    | 0 | Not-determined | Genome-fragment | NA    | 0     |
| S3_vs_k141_11808 full     | 2139  | No  | NA | 0    | 0 | Not-determined | Genome-fragment | NA    | 4.02  |
| S14_vs_k141_100085 full   | 1683  | No  | NA | 0    | 0 | Low-quality    | Genome-fragment | 5.54  | 0     |
| S5_extracted_k141_110479  | 1683  | No  | NA | 2    | 0 | Low-quality    | Genome-fragment | NA    | 0     |
| S3_vs_k141_107280 full    | 1427  | No  | NA | 0    | 1 | Not-determined | Genome-fragment | NA    | 0     |
| S3_vs_k141_122618 full    | 1819  | No  | NA | 0    | 3 | Not-determined | Genome-fragment | NA    | 0     |
| S3_vs_k141_66732 full     | 1078  | No  | NA | 0    | 0 | Not-determined | Genome-fragment | NA    | 2.41  |
| S7_extracted_26721        | 1683  | No  | NA | 0    | 0 | Low-quality    | Genome-fragment | 3.1   | 0     |
| S7_vs_84870 full          | 1683  | No  | NA | 0    | 0 | Low-quality    | Genome-fragment | NA    | 0     |
| S3_vs_k141_43548 full     | 1485  | No  | NA | 0    | 0 | Not-determined | Genome-fragment | NA    | 0     |
| S3_vs_k141_66752 full     | 10470 | Yes | NA | 1    | 4 | Not-determined | Genome-fragment | NA    | 74.58 |
| S2_vs_k141_75979 full     | 6260  | No  | NA | 2661 | 0 | Low-quality    | Genome-fragment | NA    | 0     |
| S16_extracted_134485      | 1683  | No  | NA | 0    | 1 | Low-quality    | Genome-fragment | 2.95  | 0     |
| S16_vs_103570 full        | 1683  | No  | NA | 0    | 1 | Low-quality    | Genome-fragment | 1.56  | 0     |
| S2_vs_k141_43562 full     | 6837  | No  | NA | 0    | 5 | Not-determined | Genome-fragment | NA    | 4     |
| S10_vs_13409 H2gene       | 1683  | No  | NA | 1    | 0 | Low-quality    | Genome-fragment | 3.92  | 0     |
| S12_vs_k141_19603 full    | 1683  | No  | NA | 1    | 0 | Low-quality    | Genome-fragment | 1.67  | 0     |
| S15_extracted_9428        | 1683  | No  | NA | 0    | 0 | Low-quality    | Genome-fragment | 4.6   | 0     |
| S11_vs_k141_43321 full    | 1684  | No  | NA | 0    | 0 | Low-quality    | Genome-fragment | NA    | 0     |
| S3_vs_k141_27577 full     | 1378  | No  | NA | 0    | 1 | Not-determined | Genome-fragment | NA    | 0     |
| S3_vs_k141_122699 full    | 2217  | No  | NA | 0    | 3 | Not-determined | Genome-fragment | NA    | 0.51  |
| S1_vs_k141_141447 full    | 1684  | No  | NA | 0    | 0 | Low-quality    | Genome-fragment | NA    | 0     |
| S3_vs_k141_115139 full    | 1014  | No  | NA | 0    | 0 | Not-determined | Genome-fragment | NA    | 0     |
| S3_vs_k141_12817 full     | 2738  | No  | NA | 0    | 2 | Not-determined | Genome-fragment | NA    | 3.88  |
| S1_vs_k141_112740 full    | 1684  | No  | NA | 0    | 0 | Low-quality    | Genome-fragment | NA    | 79.28 |
| S3_vs_k141_115551 full    | 1745  | No  | NA | 0    | 1 | Not-determined | Genome-fragment | 62.56 | 0     |
| S3_vs_k141_51931 full     | 3896  | No  | NA | 6    | 0 | Medium-quality | Genome-fragment | 3.87  | 0     |
| S3_vs_k141_122706 full    | 21591 | No  | NA | 9    | 0 | Medium-quality | Genome-fragment | 4.87  | 0     |
| S16_vs_60042 full         | 1684  | No  | NA | 1    | 0 | Low-quality    | Genome-fragment | NA    | 0     |
| S3_vs_k141_3509 full      | 3307  | No  | NA | 0    | 4 | Not-determined | Genome-fragment | NA    | 3.13  |
| S16_vs_124497 full        | 1684  | No  | NA | 1    | 0 | Low-quality    | Genome-fragment | NA    | 0     |
| S3_vs_k141_11898 full     | 8265  | No  | NA | 0    | 5 | Not-determined | Genome-fragment | NA    | 0     |
| S3_vs_k141_51994 full     | 1019  | No  | NA | 0    | 0 | Not-determined | Genome-fragment | NA    | 0.3   |
| S10_extracted_22191       | 1684  | No  | NA | 0    | 1 | Low-quality    | Genome-fragment | 2.64  | 0     |
| S3_vs_k141_115217 full    | 1336  | No  | NA | 0    | 2 | Not-determined | Genome-fragment | NA    | 3.16  |
| S10_vs_36790 full         | 1684  | No  | NA | 0    | 1 | Low-quality    | Genome-fragment | NA    | 0     |
| S3_vs_k141_115229 full    | 1226  | No  | NA | 0    | 2 | Not-determined | Genome-fragment | NA    | 0     |
| S12_vs_k141_133821 full   | 1684  | No  | NA | 0    | 0 | Low-quality    | Genome-fragment | NA    | 0     |
| S3_vs_k141_18772 full     | 1475  | No  | NA | 0    | 1 | Not-determined | Genome-fragment | NA    | 0     |
| S3_vs_k141_27610 full     | 3175  | No  | NA | 0    | 0 | Not-determined | Genome-fragment | NA    | 0     |
| S3_vs_k141_76101 full     | 1099  | No  | NA | 0</  |   |                |                 |       |       |



|                             |       |     |       |    |   |                |                 |    |       |       |
|-----------------------------|-------|-----|-------|----|---|----------------|-----------------|----|-------|-------|
| S3_vs_k141_27740  full      | 1817  | No  | NA    | 0  | 0 | Not-determined | Genome-fragment | NA | 0     | 0     |
| S3_vs_k141_107474  full     | 4291  | No  | NA    | 4  | 4 | Not-determined | Genome-fragment | NA | 0     | 0     |
| S6_extracted_k141_28660     | 1686  | No  | NA    | 1  | 0 | Low-quality    | Genome-fragment | NA | 2.81  | 0     |
| S8_vs_k141_17211  full      | 1686  | No  | NA    | 0  | 1 | Low-quality    | Genome-fragment | NA | 1.5   | 0     |
| S5_vs_k141_42930  full      | 1687  | No  | NA    | 1  | 0 | Low-quality    | Genome-fragment | NA | 3.43  | 0     |
| S3_vs_k141_115241  full     | 2754  | No  | NA    | 0  | 2 | Not-determined | Genome-fragment | NA | 0     | 0     |
| S3_vs_k141_3688  full       | 4525  | No  | NA    | 0  | 0 | Not-determined | Genome-fragment | NA | 0     | 0     |
| S7_extracted_59840          | 1687  | No  | NA    | 0  | 1 | Low-quality    | Genome-fragment | NA | 0.99  | 0     |
| S7_vs_88700  full           | 1687  | No  | NA    | 0  | 0 | Low-quality    | Genome-fragment | NA | 3.3   | 0     |
| S3_vs_k141_122860  full     | 2393  | No  | NA    | 0  | 0 | Not-determined | Genome-fragment | NA | 0     | 0     |
| S3_vs_k141_12985  full      | 19001 | No  | NA    | 13 | 1 | Medium-quality | Genome-fragment | NA | 58.58 | 0     |
| S3_vs_k141_12285  full      | 2812  | No  | NA    | 0  | 0 | Not-determined | Genome-fragment | NA | 0     | 0     |
| S3_vs_k141_18858  full      | 40921 | Yes | 30395 | 0  | 6 | Medium-quality | Genome-fragment | NA | 76.49 | 25.72 |
| S16_extracted_4134          | 1687  | No  | NA    | 0  | 0 | Low-quality    | Genome-fragment | NA | 4.3   | 0     |
| S10_vs_7805  full           | 1687  | No  | NA    | 1  | 0 | Low-quality    | Genome-fragment | NA | 2.27  | 0     |
| S12_extracted_k141_6121     | 1687  | No  | NA    | 0  | 2 | Low-quality    | Genome-fragment | NA | 3.33  | 0     |
| S3_vs_k141_36160  full      | 4792  | No  | NA    | 0  | 3 | Not-determined | Genome-fragment | NA | 0     | 0     |
| S3_vs_k141_107548  full     | 1360  | No  | NA    | 0  | 1 | Not-determined | Genome-fragment | NA | 0     | 0     |
| S2_vs_k141_115400  full     | 2212  | No  | NA    | 0  | 0 | Not-determined | Genome-fragment | NA | 0     | 0     |
| S12_vs_k141_129795  full    | 1687  | No  | NA    | 0  | 1 | Low-quality    | Genome-fragment | NA | 4.11  | 0     |
| S3_vs_k141_60146  full      | 1994  | No  | NA    | 0  | 1 | Not-determined | Genome-fragment | NA | 0     | 0     |
| S3_vs_k141_115414  full     | 1286  | No  | NA    | 0  | 1 | Not-determined | Genome-fragment | NA | 0     | 0     |
| S8_vs_k141_2597  full       | 1687  | No  | NA    | 0  | 0 | Low-quality    | Genome-fragment | NA | 3.1   | 0     |
| S3_vs_k141_3727  full       | 12526 | No  | NA    | 0  | 4 | Not-determined | Genome-fragment | NA | 0     | 0     |
| S17_vs_k141_163440  full    | 1688  | No  | NA    | 0  | 0 | Low-quality    | Genome-fragment | NA | 2.47  | 0     |
| S11_extracted_k141_67322    | 1688  | No  | NA    | 0  | 0 | Low-quality    | Genome-fragment | NA | 3.09  | 0     |
| S11_extracted_k141_23201    | 1688  | No  | NA    | 0  | 0 | Low-quality    | Genome-fragment | NA | 1.81  | 0     |
| S3_vs_k141_122669  full     | 1130  | No  | NA    | 0  | 1 | Not-determined | Genome-fragment | NA | 0     | 0     |
| S14_vs_k141_6364  full      | 1688  | No  | NA    | 0  | 0 | Low-quality    | Genome-fragment | NA | 10.16 | 0     |
| S3_vs_k141_91683  full      | 2278  | No  | NA    | 0  | 2 | Not-determined | Genome-fragment | NA | 0     | 0     |
| S3_vs_k141_36975  full      | 1688  | No  | NA    | 2  | 0 | Low-quality    | Genome-fragment | NA | 4     | 0     |
| S3_vs_k141_6334  full       | 1688  | No  | NA    | 0  | 0 | Low-quality    | Genome-fragment | NA | 1.78  | 0     |
| S3_vs_k141_13147  full      | 3197  | No  | NA    | 0  | 0 | Not-determined | Genome-fragment | NA | 0     | 0     |
| S5_vs_k141_34890  full      | 1688  | No  | NA    | 2  | 0 | Low-quality    | Genome-fragment | NA | 3.41  | 0     |
| S10_vs_6766  full           | 1688  | No  | NA    | 0  | 0 | Low-quality    | Genome-fragment | NA | 1.67  | 0     |
| S3_vs_k141_67016  full      | 3811  | No  | NA    | 4  | 4 | Not-determined | Genome-fragment | NA | 0     | 0     |
| S3_vs_k141_115452  full     | 2299  | No  | NA    | 0  | 0 | Not-determined | Genome-fragment | NA | 0     | 0     |
| S3_vs_k141_21690  full      | 1430  | No  | NA    | 0  | 1 | Not-determined | Genome-fragment | NA | 0     | 0     |
| S12_vs_k141_160818  l22gene | 1688  | No  | NA    | 0  | 0 | Low-quality    | Genome-fragment | NA | 3.66  | 0     |
| S6_vs_k141_39048  full      | 1688  | No  | NA    | 0  | 0 | Low-quality    | Genome-fragment | NA | 3.26  | 0     |
| S3_vs_k141_76347  full      | 2959  | No  | NA    | 0  | 0 | Not-determined | Genome-fragment | NA | 0     | 0     |
| S8_vs_k141_7975  full       | 1688  | Yes | 597   | 0  | 1 | Low-quality    | Genome-fragment | NA | 0.37  | 64.63 |
| S3_vs_k141_107653  full     | 7962  | No  | NA    | 0  | 6 | Not-determined | Genome-fragment | NA | 0     | 0     |
| S3_vs_k141_43861  full      | 1034  | No  | NA    | 0  | 0 | Not-determined | Genome-fragment | NA | 0     | 0     |
| S2_vs_k141_31699  full      | 1658  | No  | NA    | 0  | 1 | Not-determined | Genome-fragment | NA | 0     | 0     |
| S17_extracted_k141_15958    | 1689  | No  | NA    | 0  | 1 | Low-quality    | Genome-fragment | NA | 3.92  | 0     |
| S17_vs_k141_37880  full     | 1689  | No  | NA    | 0  | 2 | Low-quality    | Genome-fragment | NA | 0.78  | 0     |
| S2_vs_k141_115500  full     | 2288  | No  | NA    | 0  | 0 | Not-determined | Genome-fragment | NA | 0     | 0     |
| S17_vs_k141_130260  full    | 1689  | No  | NA    | 0  | 0 | Low-quality    | Genome-fragment | NA | 1.31  | 0     |
| S3_vs_k141_107678  full     | 1860  | No  | NA    | 0  | 0 | Not-determined | Genome-fragment | NA | 0     | 0     |
| S3_vs_k141_76398  full      | 1661  | No  | NA    | 0  | 0 | Not-determined | Genome-fragment | NA | 0     | 0     |
| S1_vs_k141_129840  full     | 1689  | No  | NA    | 0  | 0 | Low-quality    | Genome-fragment | NA | 3.4   | 0     |
| S7_vs_12063  full           | 1689  | No  | NA    | 2  | 0 | Low-quality    | Genome-fragment | NA | 3.08  | 0     |
| S16_extracted_89280         | 1689  | No  | NA    | 1  | 0 | Low-quality    | Genome-fragment | NA | 9.3   | 0     |
| S16_extracted_103461        | 1689  | No  | NA    | 3  | 0 | Low-quality    | Genome-fragment | NA | 3.37  | 0     |
| S16_vs_78198  full          | 1689  | No  | NA    | 0  | 1 | Low-quality    | Genome-fragment | NA | 1.31  | 0     |
| S10_vs_49445  full          | 1689  | No  | NA    | 0  | 0 | Low-quality    | Genome-fragment | NA | 2.56  | 0     |
| S12_vs_k141_150053  full    | 1689  | No  | NA    | 1  | 0 | Low-quality    | Genome-fragment | NA | 4.61  | 0     |
| S17_vs_k141_40851  full     | 1690  | No  | NA    | 0  | 0 | Low-quality    | Genome-fragment | NA | 2.66  | 0     |
| S1_vs_k141_24653  l22gene   | 1690  | No  | NA    | 2  | 0 | Low-quality    | Genome-fragment | NA | 4.02  | 0     |
| S3_vs_k141_76455  full      | 1520  | No  | NA    | 0  | 0 | Not-determined | Genome-fragment | NA | 0     | 0     |
| S2_vs_k141_3921  full       | 2625  | No  | NA    | 0  | 2 | Not-determined | Genome-fragment | NA | 0     | 0     |
| S7_vs_3981  full            | 1690  | No  | NA    | 0  | 1 | Low-quality    | Genome-fragment | NA | 3.47  | 0     |
| S16_extracted_105213        | 1690  | No  | NA    | 2  | 0 | Low-quality    | Genome-fragment | NA | 3.49  | 0     |
| S16_vs_100929  full         | 1690  | No  | NA    | 0  | 0 | Low-quality    | Genome-fragment | NA | 1.37  | 0     |
| S3_vs_k141_3966  full       | 4662  | No  | NA    | 0  | 5 | Not-determined | Genome-fragment | NA | 0     | 0     |
| S16_vs_151531  full         | 1690  | No  | NA    | 1  | 0 | Low-quality    | Genome-fragment | NA | 4.17  | 0     |
| S2_vs_k141_15811  full      | 1412  | No  | NA    | 0  | 0 | Not-determined | Genome-fragment | NA | 0     | 0     |
| S10_vs_110074  full         | 1690  | No  | NA    | 0  | 0 | Low-quality    | Genome-fragment | NA | 3.96  | 0     |
| S3_vs_k141_36251  full      | 5855  | No  | NA    | 0  | 3 | Not-determined | Genome-fragment | NA | 0     | 0     |
| S12_vs_k141_187099  full    | 1690  | No  | NA    | 0  | 0 | Low-quality    | Genome-fragment | NA | 2.92  | 0     |
| S3_vs_k141_27954  full      | 23641 | No  | NA    | 2  | 1 | Not-determined | Genome-fragment | NA | 0     | 0     |
| S8_extracted_k141_34032     | 1690  | No  | NA    | 1  | 0 | Low-quality    | Genome-fragment | NA | 0.31  | 0     |
| S3_vs_k141_36272  full      | 3038  | No  | NA    | 0  | 2 | Not-determined | Genome-fragment | NA | 0     | 0     |
| S3_vs_k141_91868  full      | 5661  | No  | NA    | 3  | 3 | Not-determined | Genome-fragment | NA | 0     | 0     |
| S9_vs_k141_68182  full      | 1691  | No  | NA    | 3  | 0 | Low-quality    | Genome-fragment | NA | 4.46  | 0     |
| S3_vs_k141_115585  full     | 1631  | No  | NA    | 0  | 0 | Not-determined | Genome-fragment | NA | 0     | 0     |
| S14_extracted_k141_8531     | 1691  | No  | NA    | 4  | 0 | Low-quality    | Genome-fragment | NA | 2.5   | 0     |
| S3_vs_k141_36300  full      | 1577  | No  | NA    | 0  | 0 | Not-determined | Genome-fragment | NA | 0     | 0     |
| S3_vs_k141_49877  full      | 1691  | No  | NA    | 1  | 0 | Low-quality    | Genome-fragment | NA | 2.64  | 0     |
| S3_vs_k141_76544  full      | 4323  | No  | NA    | 0  | 2 | Not-determined | Genome-fragment | NA | 0     | 0     |
| S3_vs_k141_93495  full      | 1691  | No  | NA    | 0  | 0 | Low-quality    | Genome-fragment | NA | 1.19  | 0     |
| S3_vs_k141_4026  full       | 2730  | No  | NA    | 0  | 0 | Not-determined | Genome-fragment | NA | 0     | 0     |
| S5_extracted_k141_82134     | 1691  | No  | NA    | 2  | 0 | Low-quality    | Genome-fragment | NA | 4.16  | 0     |
| S5_extracted_k141_78315     | 1691  | No  | NA    | 2  | 0 | Low-quality    | Genome-fragment | NA | 1.36  | 0     |
| S3_vs_k141_123058  full     | 1260  | No  | NA    | 0  | 0 | Not-determined | Genome-fragment | NA | 0     | 0     |
| S5_vs_k141_96028  l22gene   | 1691  | No  | NA    | 2  | 0 | Low-quality    | Genome-fragment | NA | 4.16  | 0     |
| S7_extracted_57843          | 1691  | No  | NA    | 0  | 0 | Low-quality    | Genome-fragment | NA | 3.95  | 0     |
| S3_vs_k141_51885  full      | 8211  | No  | NA    | 0  | 4 | Not-determined | Genome-fragment | NA | 0     | 0     |
| S3_vs_k141_123078  full     | 1982  | No  | NA    | 0  | 0 | Not-determined | Genome-fragment | NA | 0     | 0     |
| S6_vs_k141_39067  full      | 1691  | No  | NA    | 1  | 0 | Low-quality    | Genome-fragment | NA | 0.64  | 0     |
| S3_vs_k141_13419  full      | 1137  | No  | NA    | 0  | 1 | Not-determined | Genome-fragment | NA | 0     | 0     |
| S17_extracted_k141_119017   | 1692  | No  | NA    | 0  | 1 | Low-quality    | Genome-fragment | NA | 3.02  | 0     |
| S11_extracted_k141_79141    | 1692  | No  | NA    | 2  | 0 | Low-quality    | Genome-fragment | NA | 4.68  | 0     |
| S3_vs_k141_76562  full      | 1954  | No  | NA    | 0  | 0 | Not-determined | Genome-fragment | NA | 0     | 0     |
| S3_vs_k141_44031  full      | 4427  | No  | NA    | 0  | 3 | Not-determined | Genome-fragment | NA | 0     | 0     |
| S3_vs_k141_67295  full      | 1380  | No  | NA    | 0  | 0 | Not-determined | Genome-fragment | NA | 0     | 0     |
| S3_vs_k141_22602  full      | 6085  | No  | NA    | 0  | 4 | Not-determined | Genome-fragment | NA | 0     | 0     |
| S13_vs_75788  full          | 1692  | No  | NA    | 0  | 0 | Low-quality    | Genome-fragment | NA | 2.81  | 0     |
| S3_vs_k141_107293  full     | 1692  | No  | NA    | 0  | 2 | Low-quality    | Genome-fragment | NA | 0.81  | 0     |
| S5_vs_k141_112938  full     | 1692  | No  | NA    | 1  | 0 | Low-quality    | Genome-fragment | NA | 1.16  | 0     |
| S3_vs_k141_107857  full     | 1977  | No  | NA    | 0  | 0 | Not-determined | Genome-fragment | NA | 0     | 0     |
| S16_vs_123484  full         | 1692  | No  | NA    | 1  | 0 | Low-quality    | Genome-fragment | NA | 5.71  | 0     |
| S3_vs_k141_22632  full      | 1511  | No  | NA    | 0  | 0 | Not-determined | Genome-fragment | NA | 0     | 0     |
| S10_vs_24227  full          | 1692  | No  | NA    | 0  | 1 | Low-quality    | Genome-fragment | NA | 0.48  | 0     |
| S12_vs_k141_188774  full    | 1692  | No  | NA    | 0  | 0 | Low-quality    | Genome-fragment | NA | 2.98  | 0     |
| S2_extracted_k141_15983     | 1692  | No  | NA    | 0  | 0 | Low-quality    | Genome-fragment | NA | 1.76  | 0     |
| S3_vs_k141_115708  full     | 6757  | No  | NA    | 0  | 3 | Not-determined | Genome-fragment | NA | 0     | 0     |
| S3_vs_k141_91912  full      | 2976  | No  | NA    | 0  | 3 | Not-determined | Genome-fragment | NA | 0     | 0     |
| S3_vs_k141_52674  full      | 2559  | No  | NA    | 0  | 0 | Not-determined | Genome-fragment | NA | 0     | 0     |
| S6_vs_k141_29731  l22gene   | 1692  | No  | NA    | 1  | 0 | Low-quality    | Genome-fragment | NA | 2.94  | 0     |
| S8_vs_k141_143203  l22gene  | 1692  | No  | NA    | 0  | 1 | Low-quality    | Genome-fragment | NA | 0     | 0     |
| S17_vs_k141_14917  l22gene  | 1693  | No  | NA    | 1  | 0 | Low-quality    | Genome-fragment | NA | 2.12  | 0     |
| S3_vs_k141_99569  full      | 4396  | No  | NA    | 0  | 1 | Not-determined | Genome-fragment | NA | 2.89  | 0     |
| S2_vs_k141_46759  full      | 1693  | No  | NA    | 0  | 0 | Low-quality    | Genome-fragment | NA | 2.45  | 0     |
| S3_vs_k141_91933  full      | 1742  | No  | NA    | 0  | 1 | Not-determined | Genome-fragment | NA | 0     | 0     |
| S3_vs_k141_67367  full      | 1184  | No  | NA    | 0  | 1 | Not-determined | Genome-fragment | NA | 0     | 0     |
| S5_vs_k141_142596  full     | 1693  | No  | NA    | 1  | 0 | Low-quality    | Genome-fragment | NA | 3.68  | 0     |
| S3_vs_k141_122633  full     | 1896  | No  | NA    | 0  | 2 | Not-determined | Genome-fragment | NA | 0     | 0     |
| S5_vs_k141_115304  full     | 1693  | No  | NA    | 0  | 0 | Low-quality    | Genome-fragment | NA | 4.39  | 0     |
| S3_vs_k141_123272  full     | 5652  | No  | NA    | 0  | 5 | Not-determined | Genome-fragment | NA | 0     | 0     |
| S7_vs_13506  full           | 1693  | No  | NA    | 0  | 0 | Low-quality    | Genome-fragment | NA | 3.41  | 0     |
| S16_extracted_112544        | 1693  | No  | NA    | 0  | 0 | Low-quality    | Genome-fragment | NA | 3.08  | 0     |
| S16_vs_166180  full         | 1693  | No  | NA    | 0  | 0 | Low-quality    | Genome-fragment | NA | 3.93  | 0     |
| S12_extracted_k141_83863    | 1693  | No  | NA    | 0  | 0 | Low-quality    | Genome-fragment | NA | 4.19  | 0     |
| S4_extracted_7732           | 1693  | No  | NA    | 0  | 0 | Low-quality    | Genome-fragment | NA | 3.07  | 0     |
| S6_vs_k141_48689  full      | 1693  | No  | NA    | 1  | 0 | Low-quality    | Genome-fragment | NA | 3.09  | 0     |
| S8_vs_k141_204192  full     | 1693  | No  | NA    | 0  | 1 | Low-quality    | Genome-fragment | NA | 1.33  | 0     |
| S11_vs_k141_54260  full     | 1694  | No  | NA    | 1  | 0 | Low-quality    | Genome-fragment | NA | 2.99  | 0     |
| S3_vs_k141_44127  full      | 1266  | No  | NA    | 0  | 2 | Not-determined | Genome-fragment | NA | 0     | 0     |
| S1_vs_k141_34513  full      | 1694  | No  | NA    | 1  | 0 | Low-quality    | Genome-fragment | NA | 3.79  | 0     |
| S5_vs_k141_11511  full      | 1694  | No  | NA    | 0  | 0 | Low-quality    | Genome-fragment | NA | 0.41  | 0     |
| S3_vs_k141_115809  full     | 7091  | No  | NA    | 0  | 2 | Not-determined | Genome-fragment | NA | 2.89  | 0     |
| S16_vs_14585  full          | 1694  | No  | NA    | 0  | 0 | Low-quality    | Genome-fragment | NA | 2.89  | 0     |
| S3_vs_k141_12646  full      | 2266  | No  | NA    | 0  | 0 | Not-determined | Genome-fragment | NA | 2.87  | 0     |
| S16_vs_88403  full          | 1694  | No  | NA    | 0  | 1 | Low-quality    | Genome-fragment | NA |       |       |



|                           |       |     |    |    |                |                 |                  |       |       |
|---------------------------|-------|-----|----|----|----------------|-----------------|------------------|-------|-------|
| S3_extracted_k141_108412  | 1697  | No  | NA | 1  | 0              | Low-quality     | Genome-fragment  | 0.93  | 0     |
| S3_vs_k141_84035  full    | 1015  | No  | NA | 0  | 0              | Not-determined  | Genome-fragment  | NA    | 0     |
| S3_vs_k141_51008  full    | 1697  | No  | NA | 1  | 0              | Low-quality     | Genome-fragment  | 35.53 | 0     |
| S3_vs_k141_36596  full    | 1629  | No  | NA | 0  | 0              | Not-determined  | Genome-fragment  | NA    | 0     |
| S7_vs_110039  full        | 1697  | No  | NA | 0  | 0              | Low-quality     | Genome-fragment  | 0.82  | 0     |
| S12_vs_k141_106785  full  | 1697  | No  | NA | 0  | 0              | Low-quality     | Genome-fragment  | 0.6   | 0     |
| S6_extracted_k141_681     | 1697  | No  | NA | 0  | 0              | Low-quality     | Genome-fragment  | 1.6   | 0     |
| S3_vs_k141_2833  full     | 2230  | No  | NA | 0  | 0              | Not-determined  | Genome-fragment  | NA    | 0     |
| S3_vs_k141_6131  full     | 2729  | No  | NA | 0  | 1              | Not-determined  | Genome-fragment  | NA    | 0     |
| S6_vs_k141_29353  full    | 1697  | No  | NA | 0  | 4              | Low-quality     | Genome-fragment  | 2.66  | 0     |
| S8_vs_k141_56476  H2gene  | 1697  | No  | NA | 2  | 0              | Low-quality     | Genome-fragment  | 3.92  | 0     |
| S17_vs_k141_132658  full  | 1698  | No  | NA | 0  | 0              | Low-quality     | Genome-fragment  | 3.61  | 0     |
| S9_vs_k141_39761  full    | 1698  | No  | NA | 1  | 0              | Low-quality     | Genome-fragment  | 2.82  | 0     |
| S11_vs_k141_63113  full   | 1698  | No  | NA | 0  | 1              | Low-quality     | Genome-fragment  | 0.67  | 0     |
| S13_extracted_40401       | 1698  | Yes | NA | 1  | 1              | Low-quality     | Genome-fragment  | 0.68  | 30.04 |
| S13_vs_114017  full       | 1698  | No  | NA | 0  | 0              | Low-quality     | Genome-fragment  | 4.23  | 0     |
| S14_vs_k141_74311  H2gene | 1698  | No  | NA | 1  | 0              | Low-quality     | Genome-fragment  | 7.7   | 0     |
| S1_vs_k141_20806  full    | 1698  | No  | NA | 0  | 0              | Low-quality     | Genome-fragment  | 1.22  | 0     |
| S2_vs_k141_7058  full     | 2250  | No  | NA | 0  | 1              | Not-determined  | Genome-fragment  | NA    | 0     |
| S3_vs_k141_18770  full    | 1698  | No  | NA | 1  | 0              | Low-quality     | Genome-fragment  | 0.96  | 0     |
| S7_vs_52737  full         | 1698  | No  | NA | 1  | 0              | Low-quality     | Genome-fragment  | 2.84  | 0     |
| S7_vs_21950  full         | 1698  | No  | NA | 0  | 0              | Low-quality     | Genome-fragment  | 3.18  | 0     |
| S3_vs_k141_116238  full   | 1198  | No  | NA | 0  | 1              | Not-determined  | Genome-fragment  | NA    | 0     |
| S16_extracted_42264       | 1698  | No  | NA | 1  | 0              | Low-quality     | Genome-fragment  | 4.69  | 0     |
| S10_vs_56012  full        | 1698  | No  | NA | 1  | 0              | Low-quality     | Genome-fragment  | 3.78  | 0     |
| S6_vs_k141_17521  H2gene  | 1698  | No  | NA | 2  | 0              | Low-quality     | Genome-fragment  | 4.45  | 0     |
| S8_extracted_k141_70868   | 1698  | No  | NA | 2  | 0              | Low-quality     | Genome-fragment  | 2.1   | 0     |
| S8_extracted_k141_167894  | 1698  | No  | NA | 0  | 1              | Low-quality     | Genome-fragment  | 1.98  | 0     |
| S8_extracted_k141_163329  | 1698  | No  | NA | 0  | 1              | Low-quality     | Carsona-fragment | 0.16  | 0     |
| S3_vs_k141_77156  full    | 5941  | No  | NA | 3  | 0              | High-quality    | High-quality     | 100   | 0     |
| S3_vs_k141_77163  full    | 1614  | No  | NA | 0  | 0              | Not-determined  | Genome-fragment  | NA    | 0     |
| S3_vs_k141_14173  full    | 5863  | No  | NA | 2  | Not-determined | Genome-fragment | NA               | 0     |       |
| S3_vs_k141_116288  full   | 2536  | No  | NA | 0  | 0              | Not-determined  | Genome-fragment  | NA    | 0     |
| S8_vs_k141_65217  full    | 1698  | No  | NA | 0  | 2              | Low-quality     | Genome-fragment  | 2.43  | 0     |
| S3_vs_k141_5237  full     | 1655  | No  | NA | 0  | 0              | Not-determined  | Genome-fragment  | NA    | 0     |
| S3_vs_k141_99678  full    | 1699  | No  | NA | 0  | 0              | Low-quality     | Genome-fragment  | 2.85  | 0     |
| S5_vs_k141_99240  full    | 1699  | No  | NA | 0  | 1              | Low-quality     | Genome-fragment  | 2.63  | 0     |
| S16_extracted_29646       | 1699  | No  | NA | 0  | 2              | Low-quality     | Genome-fragment  | 1.04  | 0     |
| S16_vs_65973  full        | 1699  | No  | NA | 0  | 0              | Low-quality     | Genome-fragment  | 2.85  | 0     |
| S3_vs_k141_123696  full   | 1641  | No  | NA | 0  | 1              | Not-determined  | Genome-fragment  | NA    | 0     |
| S10_vs_58908  full        | 1699  | Yes | NA | 1  | 1              | Low-quality     | Genome-fragment  | 2.59  | 14.01 |
| S2_vs_k141_84349  full    | 2900  | No  | NA | 1  | 1              | Not-determined  | Genome-fragment  | NA    | 0     |
| S12_vs_k141_128863  full  | 1699  | No  | NA | 1  | 0              | Low-quality     | Genome-fragment  | 3.76  | 0     |
| S15_vs_70415  full        | 1699  | No  | NA | 0  | 1              | Low-quality     | Genome-fragment  | 3.24  | 0     |
| S3_vs_k141_6189  full     | 1795  | No  | NA | 0  | 2              | Not-determined  | Genome-fragment  | NA    | 0     |
| S2_vs_k141_7421  full     | 1699  | No  | NA | 0  | 0              | Low-quality     | Genome-fragment  | 2.82  | 0     |
| S3_vs_k141_92447  full    | 12356 | No  | NA | 0  | 3              | Not-determined  | Genome-fragment  | NA    | 0     |
| S8_extracted_k141_54104   | 1699  | No  | NA | 1  | 0              | Low-quality     | Genome-fragment  | 1.06  | 0     |
| S8_vs_k141_61559  full    | 1699  | No  | NA | 0  | 0              | Low-quality     | Genome-fragment  | 0.67  | 0     |
| S9_vs_k141_19803  full    | 1700  | No  | NA | 3  | 0              | Low-quality     | Genome-fragment  | 2.78  | 0     |
| S5_vs_k141_20465  full    | 1700  | No  | NA | 1  | 0              | Low-quality     | Genome-fragment  | 4.94  | 0     |
| S2_vs_k141_61269  full    | 2386  | No  | NA | 2  | Not-determined | Genome-fragment | NA               | 0     |       |
| S3_vs_k141_77315  full    | 1006  | No  | NA | 0  | 1              | Not-determined  | Genome-fragment  | NA    | 0     |
| S3_vs_k141_92488  full    | 1317  | No  | NA | 0  | 0              | Not-determined  | Genome-fragment  | NA    | 0     |
| S2_vs_k141_9999  full     | 6144  | No  | NA | 0  | 3              | Not-determined  | Genome-fragment  | NA    | 0     |
| S3_vs_k141_84481  full    | 1142  | No  | NA | 0  | 0              | Not-determined  | Genome-fragment  | NA    | 0     |
| S3_vs_k141_99968  full    | 1906  | No  | NA | 0  | 2              | Not-determined  | Genome-fragment  | NA    | 0     |
| S2_vs_k141_19995  full    | 1700  | No  | NA | 0  | 2              | Low-quality     | Genome-fragment  | 1.5   | 0     |
| S3_vs_k141_61340  full    | 1448  | No  | NA | 0  | 1              | Not-determined  | Genome-fragment  | NA    | 0     |
| S9_vs_k141_13590  full    | 1701  | No  | NA | 0  | 0              | Low-quality     | Genome-fragment  | 0.67  | 0     |
| S3_vs_k141_123783  full   | 1575  | No  | NA | 0  | 1              | Not-determined  | Genome-fragment  | NA    | 0     |
| S14_vs_k141_11479  full   | 1701  | No  | NA | 0  | 0              | Low-quality     | Genome-fragment  | 4.24  | 0     |
| S1_vs_k141_7765  H2gene   | 1701  | No  | NA | 1  | 0              | Low-quality     | Genome-fragment  | 1.18  | 0     |
| S7_extracted_21815        | 1701  | No  | NA | 1  | 0              | Low-quality     | Genome-fragment  | 2.24  | 0     |
| S3_vs_k141_116409  full   | 4535  | No  | NA | 3  | Not-determined | Genome-fragment | NA               | 0     |       |
| S3_vs_k141_36826  full    | 3878  | No  | NA | 0  | 2              | Not-determined  | Genome-fragment  | NA    | 0     |
| S3_vs_k141_84571  full    | 1944  | No  | NA | 0  | 1              | Not-determined  | Genome-fragment  | NA    | 0     |
| S3_vs_k141_61493  full    | 3845  | No  | NA | 0  | 4              | Not-determined  | Genome-fragment  | NA    | 0     |
| S7_extracted_5611         | 1701  | No  | NA | 0  | 0              | Low-quality     | Genome-fragment  | 3.25  | 0     |
| S3_vs_k141_67962  full    | 6711  | No  | NA | 0  | 2              | Not-determined  | Genome-fragment  | NA    | 0     |
| S16_vs_68118  full        | 1701  | No  | NA | 0  | 0              | Low-quality     | Genome-fragment  | 3.01  | 0     |
| S16_vs_58257  full        | 1701  | No  | NA | 0  | 0              | Low-quality     | Genome-fragment  | 3.07  | 0     |
| S3_vs_k141_123834  full   | 37186 | No  | NA | 19 | 1              | High-quality    | High-quality     | 98.16 | 0     |
| S10_vs_55138  full        | 1701  | No  | NA | 0  | 1              | Low-quality     | Genome-fragment  | 1.03  | 0     |
| S15_vs_57434  full        | 1701  | No  | NA | 0  | 0              | Low-quality     | Genome-fragment  | 2.93  | 0     |
| S3_vs_k141_20099  full    | 3513  | No  | NA | 0  | 1              | Not-determined  | Genome-fragment  | NA    | 0     |
| S3_vs_k141_61534  full    | 3530  | No  | NA | 0  | 1              | Not-determined  | Genome-fragment  | NA    | 0     |
| S3_vs_k141_123889  full   | 3561  | No  | NA | 0  | 3              | Not-determined  | Genome-fragment  | NA    | 0     |
| S2_extracted_k141_5217    | 1701  | No  | NA | 0  | 0              | Low-quality     | Genome-fragment  | 5.6   | 0     |
| S3_vs_k141_4654  full     | 1291  | No  | NA | 0  | 1              | Not-determined  | Genome-fragment  | NA    | 0     |
| S2_vs_k141_1401  full     | 1701  | No  | NA | 0  | 2              | Low-quality     | Genome-fragment  | 0.57  | 0     |
| S8_extracted_k141_129572  | 1701  | No  | NA | 0  | 0              | Low-quality     | Genome-fragment  | 1.94  | 0     |
| S3_vs_k141_92587  full    | 1541  | No  | NA | 0  | 0              | Not-determined  | Genome-fragment  | NA    | 0     |
| S11_vs_k141_85114  full   | 1702  | No  | NA | 0  | 0              | Low-quality     | Genome-fragment  | 2.97  | 0     |
| S12_vs_65977  full        | 1702  | No  | NA | 0  | 0              | Low-quality     | Genome-fragment  | 3.35  | 0     |
| S14_vs_k141_6173  full    | 1702  | No  | NA | 1  | 0              | Low-quality     | Genome-fragment  | 3.88  | 0     |
| S3_vs_k141_67976  full    | 2042  | No  | NA | 0  | 1              | Not-determined  | Genome-fragment  | NA    | 0     |
| S1_extracted_k141_127729  | 1702  | No  | NA | 0  | 0              | Low-quality     | Genome-fragment  | 1.29  | 0     |
| S3_vs_k141_134515  full   | 2234  | No  | NA | 0  | 2              | Not-determined  | Genome-fragment  | NA    | 0     |
| S3_vs_k141_123962  full   | 3388  | No  | NA | 0  | 3              | Not-determined  | Genome-fragment  | NA    | 0     |
| S3_vs_k141_123965  full   | 1610  | No  | NA | 0  | 2              | Not-determined  | Genome-fragment  | NA    | 0     |
| S3_vs_k141_65441  full    | 1702  | No  | NA | 0  | 0              | Low-quality     | Genome-fragment  | 3.57  | 0     |
| S3_vs_k141_93987  full    | 1702  | No  | NA | 0  | 0              | Low-quality     | Genome-fragment  | 4.71  | 0     |
| S3_vs_k141_13444  full    | 3844  | No  | NA | 0  | 0              | Not-determined  | Genome-fragment  | NA    | 0     |
| S3_vs_k141_123973  full   | 30858 | No  | NA | 6  | Not-determined | Genome-fragment | NA               | 0     |       |
| S7_vs_24295  full         | 1702  | No  | NA | 0  | 2              | Low-quality     | Genome-fragment  | 2.11  | 0     |
| S3_vs_k141_84734  full    | 3213  | No  | NA | 0  | 3              | Not-determined  | Genome-fragment  | NA    | 0     |
| S3_vs_k141_17033  full    | 6293  | No  | NA | 0  | 3              | Not-determined  | Genome-fragment  | NA    | 0     |
| S3_vs_k141_100075  full   | 1300  | No  | NA | 0  | 0              | Not-determined  | Genome-fragment  | NA    | 0     |
| S3_vs_k141_123981  full   | 1514  | No  | NA | 0  | 0              | Not-determined  | Genome-fragment  | NA    | 0     |
| S16_vs_122928  full       | 1702  | No  | NA | 0  | 0              | Low-quality     | Genome-fragment  | 4.84  | 0     |
| S4_extracted_20818        | 1702  | No  | NA | 0  | 0              | Low-quality     | Genome-fragment  | 3.39  | 0     |
| S6_vs_k141_5249  full     | 1702  | No  | NA | 2  | 0              | Low-quality     | Genome-fragment  | 3.8   | 0     |
| S8_extracted_k141_124903  | 1702  | No  | NA | 0  | 0              | Low-quality     | Genome-fragment  | 1.42  | 0     |
| S11_vs_k141_59882  full   | 1703  | No  | NA | 0  | 1              | Low-quality     | Genome-fragment  | 1.41  | 0     |
| S14_extracted_k141_36347  | 1703  | No  | NA | 1  | 0              | Low-quality     | Genome-fragment  | 3.59  | 0     |
| S3_vs_k141_14560  full    | 1155  | No  | NA | 0  | 0              | Not-determined  | Genome-fragment  | NA    | 0     |
| S3_extracted_k141_125183  | 1703  | No  | NA | 0  | 0              | Low-quality     | Genome-fragment  | 3.6   | 0     |
| S3_vs_k141_52738  full    | 1316  | No  | NA | 0  | 0              | Not-determined  | Genome-fragment  | NA    | 0     |
| S3_vs_k141_100132  full   | 2550  | No  | NA | 0  | 0              | Not-determined  | Genome-fragment  | NA    | 0     |
| S3_vs_k141_124019  full   | 5025  | No  | NA | 0  | 3              | Not-determined  | Genome-fragment  | NA    | 0     |
| S3_vs_k141_100141  full   | 5444  | No  | NA | 0  | 0              | Not-determined  | Genome-fragment  | NA    | 0     |
| S3_vs_k141_20315  full    | 36208 | No  | NA | 15 | 1              | Medium-quality  | Genome-fragment  | 88.82 | 0     |
| S3_vs_k141_124030  full   | 6703  | No  | NA | 0  | 3              | Not-determined  | Genome-fragment  | NA    | 0     |
| S3_vs_k141_68023  full    | 80878 | Yes | NA | 15 | 27             | Low-quality     | Genome-fragment  | 50.83 | 61.99 |
| S3_vs_k141_100146  full   | 2312  | No  | NA | 0  | 1              | Not-determined  | Genome-fragment  | NA    | 0     |
| S5_vs_k141_134286  full   | 1703  | No  | NA | 1  | 0              | Low-quality     | Genome-fragment  | 4.9   | 0     |
| S2_vs_k141_28793  full    | 3612  | No  | NA | 2  | Not-determined | Genome-fragment | NA               | 0     |       |
| S3_vs_k141_17075  full    | 2094  | No  | NA | 0  | 0              | Not-determined  | Genome-fragment  | NA    | 0     |
| S3_vs_k141_100157  full   | 1964  | No  | NA | 0  | 0              | Not-determined  | Genome-fragment  | NA    | 0     |
| S7_vs_135483  full        | 1703  | No  | NA | 0  | 0              | Low-quality     | Genome-fragment  | 4.6   | 0     |
| S16_extracted_120722      | 1703  | Yes | NA | 1  | 0              | Low-quality     | Genome-fragment  | 0.87  | 58.49 |
| S12_vs_k141_79047  full   | 1703  | No  | NA | 0  | 1              | Low-quality     | Genome-fragment  | 1.01  | 0     |
| S12_vs_k141_144629  full  | 1703  | No  | NA | 1  | 0              | Low-quality     | Genome-fragment  | 1.64  | 0     |
| S2_vs_k141_61673  full    | 1968  | No  | NA | 2  | Not-determined | Genome-fragment | NA               | 0     |       |
| S3_vs_k141_84940  full    | 1968  | No  | NA | 0  | 1              | Not-determined  | Genome-fragment  | NA    | 0     |
| S4_extracted_22291        | 1703  | No  | NA | 1  | 0              | Low-quality     | Genome-fragment  | 4.27  | 0     |
| S8_extracted_k141_157941  | 1703  | No  | NA | 0  | 1              | Low-quality     | Genome-fragment  | 1.08  | 0     |
| S8_vs_k141_96708  full    | 1703  | No  | NA | 0  | 0              | Low-quality     | Genome-fragment  | 2.95  | 0     |
| S3_vs_k141_108658  full   | 2253  | No  | NA | 0  | 0              | Not-determined  | Genome-fragment  | NA    | 0     |
| S3_vs_k141_108685  full   | 2410  | No  | NA | 0  | 0              | Not-determined  | Genome-fragment  | NA    | 0     |
| S8_vs_k141_144090  H2gene | 1703  | No  | NA | 2  | 0              | Low-quality     | Genome-fragment  | 5.07  | 0     |
| S14_extracted_k141_101084 | 1704  | No  | NA | 0  | 1              | Low-quality     | Genome-fragment  | 0.64  | 0     |
| S3_extracted_k141_58058   | 1704  | No  | NA | 1  | 0              | Low-quality     | Genome-fragment  | 7.77  | 0     |
| S3_vs_k141_37159  full    | 4705  | No  | NA | 0  | 0              | Not-determined  | Genome-fragment  | NA    | 0     |
| S5_vs_k141_141370  full   | 1704  | No  | NA | 2  | 0              | Low-quality     | Genome-fragment  | 2.8   | 0     |
| S3_vs_k141_13666  full    | 2642  | No  | NA | 0  | 0              | Not-determined  | Genome-fragment  | NA    | 0     |
| S5_vs_k141_4649  full     | 1704  | No  | NA | 0  | 0              | Low-quality     | Genome-fragment  | 2.16  | 0     |
| S3_vs_k141_68204  full    | 2486  | No  | NA | 0  | 1              | Not-determined  | Genome-fragment  | NA    | 0     |
| S16_extracted_101554      | 1704  | No  | NA | 0  | 1              | Low-quality     | Genome-fragment  | 1.44  | 0     |
| S3_vs_k141_20416  full    | 2294  | No  | NA | 0  | 2              | Not-determined  | Genome-fragment  | NA    | 0     |
| S3_vs_k141_58857  full    | 2899  | No  | NA | 1  | 2              | Not-determined  | Genome-fragment  | NA    | 0     |
| S3_vs_k141_84966  full    | 1779  | No  | NA | 0  | 0              | Not-determined  | Genome-fragment  | NA    | 0     |
| S8_vs_k141_18859  full    | 1704  | No  | NA | 0  | 0              | Low-quality     | Genome-fragment  | 3.07  | 0     |
| S11_vs_k141_69001  full   | 1705  |     |    |    |                |                 |                  |       |       |



|                            |       |     |    |     |                |                 |                 |                 |      |       |
|----------------------------|-------|-----|----|-----|----------------|-----------------|-----------------|-----------------|------|-------|
| 58_vs_k141_63840  full     | 1706  | No  | NA | 0   | 2              | Low-quality     | Genome-fragment | 0.65            | 0    |       |
| S17_extracted_k141_37910   | 1707  | No  | NA | 0   | 0              | Low-quality     | Genome-fragment | 1.55            | 0    |       |
| S11_extracted_k141_50940   | 1707  | No  | NA | 1   | 0              | Low-quality     | Genome-fragment | 3.03            | 0    |       |
| S14_extracted_k141_47194   | 1707  | No  | NA | 0   | 0              | Low-quality     | Genome-fragment | 3.69            | 0    |       |
| S3_vs_k141_116872  full    | 1255  | No  | NA | 0   | 0              | Not-determined  | Genome-fragment | NA              | 0    |       |
| S14_extracted_k141_13937   | 1707  | No  | NA | 0   | 1              | Low-quality     | Genome-fragment | 3.87            | 0    |       |
| S3_vs_k141_119773  H2gene  | 1707  | No  | NA | 2   | 0              | Low-quality     | Genome-fragment | 4.06            | 0    |       |
| S7_vs_102087  full         | 1707  | No  | NA | 0   | 0              | Low-quality     | Genome-fragment | 2.83            | 0    |       |
| S3_vs_k141_105741  full    | 1627  | No  | NA | 1   | Not-determined | Genome-fragment | NA              | 0               |      |       |
| S3_vs_k141_109009  full    | 2111  | No  | NA | 0   | 1              | Not-determined  | Genome-fragment | NA              | 0    |       |
| S16_vs_131717  full        | 1707  | No  | NA | 1   | 0              | Low-quality     | Genome-fragment | 3.35            | 0    |       |
| S3_vs_k141_116887  full    | 3737  | No  | NA | 4   | Not-determined | Genome-fragment | NA              | 0               |      |       |
| S3_vs_k141_20591  full     | 3291  | No  | NA | 0   | 2              | Not-determined  | Genome-fragment | NA              | 0    |       |
| S3_vs_k141_37376  full     | 2759  | No  | NA | 0   | 1              | Not-determined  | Genome-fragment | NA              | 0    |       |
| S3_vs_k141_68497  full     | 3026  | No  | NA | 0   | 2              | Not-determined  | Genome-fragment | NA              | 0    |       |
| S12_vs_k141_178148  H2gene | 1707  | No  | NA | 0   | 1              | Low-quality     | Genome-fragment | 4.46            | 0    |       |
| S3_vs_k141_68507  full     | 3985  | No  | NA | 0   | 0              | Not-determined  | Genome-fragment | NA              | 0    |       |
| S3_vs_k141_85279  full     | 3067  | No  | NA | 0   | 4              | Not-determined  | Genome-fragment | NA              | 0    |       |
| S2_vs_k141_29077  full     | 2840  | No  | NA | 19  | 0              | Medium-quality  | Genome-fragment | 81.53           | 0    |       |
| S3_vs_k141_85293  full     | 2611  | No  | NA | 0   | 4              | Not-determined  | Genome-fragment | NA              | 0    |       |
| S6_vs_k141_6405  full      | 1707  | Yes | NA | 678 | 1              | 1               | Low-quality     | Genome-fragment | 0.28 | 60.28 |
| S8_extracted_k141_20726    | 1707  | No  | NA | 0   | 0              | Low-quality     | Genome-fragment | 3.75            | 0    |       |
| S8_vs_k141_115794  H2gene  | 1707  | No  | NA | 1   | 0              | Low-quality     | Genome-fragment | 4.5             | 0    |       |
| S3_vs_k141_78067  full     | 1812  | No  | NA | 0   | 1              | Not-determined  | Genome-fragment | NA              | 0    |       |
| S3_vs_k141_53985  full     | 3519  | No  | NA | 0   | 2              | Not-determined  | Genome-fragment | NA              | 0    |       |
| S3_vs_k141_68556  full     | 2260  | No  | NA | 0   | 1              | Not-determined  | Genome-fragment | NA              | 0    |       |
| S3_vs_k141_5172  full      | 4439  | No  | NA | 0   | 3              | Not-determined  | Genome-fragment | NA              | 0    |       |
| S3_vs_k141_5211  full      | 1322  | No  | NA | 0   | 0              | Not-determined  | Genome-fragment | NA              | 0    |       |
| S3_vs_k141_5220  full      | 2162  | No  | NA | 0   | 1              | Not-determined  | Genome-fragment | NA              | 0    |       |
| S9_extracted_k141_48387    | 1708  | No  | NA | 0   | 2              | Low-quality     | Genome-fragment | 5.26            | 0    |       |
| S9_vs_k141_64696  full     | 1708  | No  | NA | 0   | 0              | Low-quality     | Genome-fragment | 3.49            | 0    |       |
| S3_vs_k141_68591  full     | 2054  | No  | NA | 0   | 0              | Not-determined  | Genome-fragment | NA              | 0    |       |
| S3_vs_k141_116979  full    | 4934  | No  | NA | 0   | 2              | Not-determined  | Genome-fragment | NA              | 0    |       |
| S11_extracted_k141_90659   | 1708  | No  | NA | 1   | 0              | Low-quality     | Genome-fragment | 1.87            | 0    |       |
| S3_vs_k141_5111  full      | 3845  | No  | NA | 0   | 2              | Not-determined  | Genome-fragment | NA              | 0    |       |
| S3_vs_k141_51084  full     | 3836  | No  | NA | 0   | 1              | Not-determined  | Genome-fragment | NA              | 0    |       |
| S12_vs_43911  full         | 1708  | No  | NA | 0   | 1              | Low-quality     | Genome-fragment | 2.2             | 0    |       |
| S14_extracted_k141_102820  | 1708  | No  | NA | 4   | 0              | Low-quality     | Genome-fragment | 5.64            | 0    |       |
| S14_vs_k141_22607  full    | 1708  | No  | NA | 0   | 1              | Low-quality     | Genome-fragment | 4.02            | 0    |       |
| S3_vs_k141_62158  full     | 4733  | No  | NA | 0   | 2              | Not-determined  | Genome-fragment | NA              | 0    |       |
| S3_vs_k141_124412  full    | 3482  | No  | NA | 0   | 4              | Not-determined  | Genome-fragment | NA              | 0    |       |
| S3_vs_k141_93122  full     | 1562  | No  | NA | 0   | 1              | Not-determined  | Genome-fragment | NA              | 0    |       |
| S3_vs_k141_15176  full     | 1061  | No  | NA | 0   | 1              | Not-determined  | Genome-fragment | NA              | 0    |       |
| S16_extracted_23891        | 1708  | No  | NA | 0   | 1              | Low-quality     | Genome-fragment | 1.15            | 0    |       |
| S16_vs_46579  full         | 1708  | No  | NA | 0   | 0              | Low-quality     | Genome-fragment | 0.97            | 0    |       |
| S3_vs_k141_5187  full      | 1153  | No  | NA | 0   | 0              | Not-determined  | Genome-fragment | NA              | 0    |       |
| S16_vs_93161  full         | 1708  | No  | NA | 0   | 0              | Low-quality     | Genome-fragment | 1.25            | 0    |       |
| S16_vs_20707  H2gene       | 1708  | No  | NA | 2   | 0              | Low-quality     | Genome-fragment | 5.77            | 0    |       |
| S8_vs_k141_137048  full    | 1708  | No  | NA | 0   | 0              | Low-quality     | Genome-fragment | 34.28           | 0    |       |
| S3_vs_k141_62246  full     | 1002  | No  | NA | 0   | 2              | Not-determined  | Genome-fragment | NA              | 0    |       |
| S3_vs_k141_85410  full     | 3217  | No  | NA | 0   | 1              | Not-determined  | Genome-fragment | NA              | 0    |       |
| S2_vs_k141_15223  full     | 1029  | No  | NA | 0   | 0              | Not-determined  | Genome-fragment | NA              | 0    |       |
| S11_vs_k141_87360  full    | 1709  | No  | NA | 1   | 0              | Low-quality     | Genome-fragment | 4.61            | 0    |       |
| S13_extracted_38612        | 1709  | No  | NA | 0   | 0              | Low-quality     | Genome-fragment | 1.14            | 0    |       |
| S11_extracted_k141_20140   | 1709  | No  | NA | 2   | 0              | Low-quality     | Genome-fragment | 4.29            | 0    |       |
| S3_vs_k141_124522  full    | 1556  | No  | NA | 0   | 2              | Not-determined  | Genome-fragment | NA              | 0    |       |
| S3_vs_k141_110714  full    | 1709  | No  | NA | 0   | 0              | Low-quality     | Genome-fragment | 1.06            | 0    |       |
| S3_vs_k141_45147  full     | 50239 | No  | NA | 16  | 1              | High-quality    | High-quality    | 100             | 0    |       |
| S5_vs_k141_134558  full    | 1709  | No  | NA | 0   | 0              | Low-quality     | Genome-fragment | 1.69            | 0    |       |
| S16_extracted_102596       | 1709  | No  | NA | 1   | 0              | Low-quality     | Genome-fragment | 3.81            | 0    |       |
| S16_vs_52956  full         | 1709  | No  | NA | 2   | 0              | Low-quality     | Genome-fragment | 4.04            | 0    |       |
| S3_vs_k141_107288  full    | 4046  | No  | NA | 2   | Not-determined | Genome-fragment | NA              | 0               |      |       |
| S12_vs_k141_34084  full    | 1709  | No  | NA | 1   | 0              | Low-quality     | Genome-fragment | 4.12            | 0    |       |
| S15_extracted_45932        | 1709  | No  | NA | 1   | 0              | Low-quality     | Genome-fragment | 10.8            | 0    |       |
| S15_vs_12857  full         | 1709  | No  | NA | 0   | 2              | Low-quality     | Genome-fragment | 2.73            | 0    |       |
| S3_vs_k141_124548  full    | 1062  | No  | NA | 0   | 0              | Not-determined  | Genome-fragment | NA              | 0    |       |
| S15_vs_51324  full         | 1709  | No  | NA | 2   | 0              | Low-quality     | Genome-fragment | 0.91            | 0    |       |
| S3_vs_k141_2930  full      | 1665  | No  | NA | 0   | 2              | Not-determined  | Genome-fragment | NA              | 0    |       |
| S3_vs_k141_124568  full    | 1227  | No  | NA | 0   | 1              | Not-determined  | Genome-fragment | NA              | 0    |       |
| S3_vs_k141_68845  full     | 1071  | No  | NA | 0   | 0              | Not-determined  | Genome-fragment | NA              | 0    |       |
| S3_vs_k141_100582  full    | 1131  | No  | NA | 0   | 1              | Not-determined  | Genome-fragment | NA              | 0    |       |
| S2_vs_k141_4045  full      | 1709  | No  | NA | 0   | 0              | Low-quality     | Genome-fragment | 4.19            | 0    |       |
| S3_vs_k141_29318  full     | 2808  | No  | NA | 0   | 0              | Not-determined  | Genome-fragment | NA              | 0    |       |
| S8_extracted_k141_124121   | 1709  | No  | NA | 0   | 1              | Low-quality     | Genome-fragment | 5.46            | 0    |       |
| S3_vs_k141_124574  full    | 20388 | No  | NA | 7   | Not-determined | Genome-fragment | NA              | 0               |      |       |
| S3_vs_k141_85586  full     | 2031  | No  | NA | 0   | 0              | Not-determined  | Genome-fragment | NA              | 0    |       |
| S17_extracted_k141_72831   | 1710  | No  | NA | 2   | 0              | Low-quality     | Genome-fragment | 7.8             | 0    |       |
| S17_vs_k141_33216  full    | 1710  | No  | NA | 0   | 2              | Low-quality     | Genome-fragment | 0.48            | 0    |       |
| S3_vs_k141_97153  full     | 1710  | No  | NA | 0   | 2              | Low-quality     | Genome-fragment | 4.12            | 0    |       |
| S5_vs_k141_130481  full    | 1710  | No  | NA | 0   | 0              | Low-quality     | Genome-fragment | 4.38            | 0    |       |
| S3_vs_k141_23987  full     | 1482  | No  | NA | 0   | 1              | Not-determined  | Genome-fragment | NA              | 0    |       |
| S2_vs_k141_62410  full     | 32306 | No  | NA | 20  | 1              | High-quality    | High-quality    | 91.88           | 0    |       |
| S7_extracted_687           | 1710  | No  | NA | 3   | 0              | Low-quality     | Genome-fragment | 3.9             | 0    |       |
| S10_extracted_35430        | 1710  | No  | NA | 2   | 0              | Low-quality     | Genome-fragment | 2.95            | 0    |       |
| S8_vs_k141_106724  full    | 1710  | No  | NA | 2   | 0              | Low-quality     | Genome-fragment | 2.32            | 0    |       |
| S3_vs_k141_100689  full    | 1430  | No  | NA | 0   | 3              | Not-determined  | Genome-fragment | NA              | 0    |       |
| S17_vs_k141_159558  full   | 1711  | No  | NA | 3   | 0              | Low-quality     | Genome-fragment | 2.81            | 0    |       |
| S14_vs_k141_34258  H2gene  | 1711  | No  | NA | 1   | 0              | Low-quality     | Genome-fragment | 3.68            | 0    |       |
| S5_vs_k141_13823  full     | 1711  | No  | NA | 0   | 0              | Low-quality     | Genome-fragment | 1.07            | 0    |       |
| S7_vs_9127  full           | 1711  | No  | NA | 2   | 0              | Low-quality     | Genome-fragment | 2.77            | 0    |       |
| S16_extracted_150715       | 1711  | No  | NA | 0   | 0              | Low-quality     | Genome-fragment | 5.33            | 0    |       |
| S2_vs_k141_109514  full    | 3848  | No  | NA | 0   | 0              | Not-determined  | Genome-fragment | NA              | 0    |       |
| S10_vs_36678  full         | 1711  | No  | NA | 0   | 0              | Low-quality     | Genome-fragment | 3.17            | 0    |       |
| S8_extracted_k141_164068   | 1711  | No  | NA | 0   | 2              | Low-quality     | Genome-fragment | 1.67            | 0    |       |
| S17_vs_k141_71163  full    | 1712  | No  | NA | 0   | 1              | Low-quality     | Genome-fragment | 1.34            | 0    |       |
| S17_vs_k141_87026  full    | 1712  | No  | NA | 0   | 0              | Low-quality     | Genome-fragment | 2.49            | 0    |       |
| S9_vs_k141_77323  full     | 1712  | No  | NA | 1   | 0              | Low-quality     | Genome-fragment | 3.1             | 0    |       |
| S3_vs_k141_15382  full     | 2348  | No  | NA | 0   | 0              | Not-determined  | Genome-fragment | NA              | 0    |       |
| S3_vs_k141_51458  full     | 2622  | No  | NA | 0   | 0              | Not-determined  | Genome-fragment | NA              | 0    |       |
| S3_vs_k141_45367  full     | 2581  | No  | NA | 0   | 3              | Not-determined  | Genome-fragment | NA              | 0    |       |
| S11_extracted_k141_19638   | 1712  | No  | NA | 0   | 0              | Low-quality     | Genome-fragment | 3.82            | 0    |       |
| S3_vs_k141_45386  full     | 1228  | No  | NA | 0   | 1              | Not-determined  | Genome-fragment | NA              | 0    |       |
| S3_vs_k141_109623  full    | 1143  | No  | NA | 0   | 1              | Not-determined  | Genome-fragment | NA              | 0    |       |
| S3_vs_k141_100779  full    | 1132  | No  | NA | 0   | 0              | Not-determined  | Genome-fragment | NA              | 0    |       |
| S11_vs_k141_46432  full    | 1712  | No  | NA | 0   | 0              | Low-quality     | Genome-fragment | 3.17            | 0    |       |
| S1_vs_k141_59872  H2gene   | 1712  | No  | NA | 1   | 0              | Low-quality     | Genome-fragment | 3.56            | 0    |       |
| S3_vs_k141_124651  full    | 2586  | No  | NA | 0   | 2              | Not-determined  | Genome-fragment | NA              | 0    |       |
| S3_vs_k141_117154  full    | 62603 | No  | NA | 0   | 18             | Not-determined  | Genome-fragment | NA              | 0    |       |
| S3_vs_k141_36719  H2gene   | 1712  | No  | NA | 0   | 0              | Low-quality     | Genome-fragment | 3.65            | 0    |       |
| S16_vs_169594  H2gene      | 1712  | No  | NA | 1   | 0              | Low-quality     | Genome-fragment | 2.89            | 0    |       |
| S12_extracted_k141_126736  | 1712  | No  | NA | 0   | 0              | Low-quality     | Genome-fragment | 2.66            | 0    |       |
| S3_vs_k141_78400  full     | 1091  | No  | NA | 0   | 0              | Not-determined  | Genome-fragment | NA              | 0    |       |
| S12_vs_k141_10980  full    | 1712  | No  | NA | 3   | 0              | Low-quality     | Genome-fragment | 4.32            | 0    |       |
| S15_vs_61575  full         | 1712  | No  | NA | 2   | 0              | Low-quality     | Genome-fragment | 3.28            | 0    |       |
| S2_vs_k141_20913  full     | 5706  | No  | NA | 1   | Not-determined | Genome-fragment | NA              | 0               |      |       |
| S3_vs_k141_100785  full    | 38147 | No  | NA | 15  | 0              | High-quality    | High-quality    | 98.45           | 0    |       |
| S8_extracted_k141_117963   | 1712  | No  | NA | 0   | 2              | Low-quality     | Genome-fragment | 3.17            | 0    |       |
| S2_vs_k141_124716  full    | 1377  | No  | NA | 0   | 0              | Not-determined  | Genome-fragment | NA              | 0    |       |
| S3_vs_k141_85753  full     | 2891  | No  | NA | 0   | 1              | Not-determined  | Genome-fragment | NA              | 0    |       |
| S3_vs_k141_29654  full     | 1764  | No  | NA | 0   | 1              | Not-determined  | Genome-fragment | NA              | 0    |       |
| S8_vs_k141_154521  full    | 1712  | No  | NA | 0   | 0              | Low-quality     | Genome-fragment | 4.01            | 0    |       |
| S8_vs_k141_52766  full     | 1712  | No  | NA | 0   | 0              | Low-quality     | Genome-fragment | 2.84            | 0    |       |
| S3_vs_k141_15450  full     | 44266 | No  | NA | 18  | 0              | High-quality    | High-quality    | 99.79           | 0    |       |
| S8_vs_k141_148509  H2gene  | 1712  | No  | NA | 1   | 0              | Low-quality     | Genome-fragment | 4.11            | 0    |       |
| S9_extracted_k141_80036    | 1713  | No  | NA | 0   | 1              | Low-quality     | Genome-fragment | 0.93            | 0    |       |
| S13_vs_83381  full         | 1713  | No  | NA | 0   | 1              | Low-quality     | Genome-fragment | 2.83            | 0    |       |
| S3_vs_k141_15487  full     | 2070  | No  | NA | 0   | 2              | Not-determined  | Genome-fragment | NA              | 0    |       |
| S3_vs_k141_12652  full     | 1713  | No  | NA | 1   | 0              | Low-quality     | Genome-fragment | 1.45            | 0    |       |
| S5_vs_k141_140990  full    | 1713  | No  | NA | 0   | 0              | Low-quality     | Genome-fragment | 1.47            | 0    |       |
| S3_vs_k141_124783  full    | 2048  | No  | NA | 0   | 2              | Not-determined  | Genome-fragment | NA              | 0    |       |
| S8_extracted_k141_105500   | 1713  | No  | NA | 1   | 0              | Low-quality     | Genome-fragment | 3.72            | 0    |       |
| S3_vs_k141_51684  full     | 1029  | No  | NA | 0   | 0              | Not-determined  | Genome-fragment | NA              | 0    |       |
| S8_extracted_k141_150162   | 1713  | No  | NA | 0   | 0              | Low-quality     | Genome-fragment | 4.62            | 0    |       |
| S17_vs_k141_29739  full    | 1714  | No  | NA | 0   | 0              | Low-quality     | Genome-fragment | 1.8             | 0    |       |
| S9_extracted_k141_27580    | 1714  | No  | NA | 0   | 0              | Low-quality     | Genome-fragment | 0.99            | 0    |       |
| S3_vs_k141_85838  full     | 2969  | No  | NA | 0   | 1              | Not-determined  | Genome-fragment | NA              | 0    |       |
| S9_vs_k141_1928  H2gene    | 1714  | No  | NA | 1   | 0              | Low-quality     | Genome-fragment | 2.5             | 0    |       |
| S3_vs_k141_54303  full     | 43708 | No  | NA | 17  | 2              | High-quality    | High-quality    | 97.38           | 0    |       |
| S3_vs_k141_54307  full     | 1605  | No  | NA | 0   | 1              | Not-determined  | Genome-fragment | NA              | 0    |       |
| S11_vs_k141_72764  full    | 1714  | No  | NA | 1   | 0              | Low-quality     | Genome-fragment | 3.23            | 0    |       |
| S13_vs_151534  full        | 1714  | No  | NA | 0   | 0              | Low-quality     | Genome-fragment | 3.46            | 0    |       |
| S3_vs_k141_111717  full    | 1714  | No  | NA | 0   | 0              | Low-quality     | Genome-fragment | 1.14            | 0    |       |
| S3_vs_k141_15646  full     | 1475  | No  | NA | 0   | 2              | Not-determined  | Genome-fragment | NA              | 0    |       |
| S5_vs_k141_29262  full     | 1714  | No  | NA | 0   | 0              | Low-quality     | Genome-         |                 |      |       |



|                           |        |       |     |     |   |    |                |                 |    |       |
|---------------------------|--------|-------|-----|-----|---|----|----------------|-----------------|----|-------|
| S3_vs_k141_29909          | [full] | 5501  | No  | NA  | 0 | 2  | Not-determined | Genome-fragment | NA | 0     |
| S3_vs_k141_29959          | [full] | 2280  | No  | NA  | 0 | 2  | Not-determined | Genome-fragment | NA | 0     |
| S3_vs_k141_86122          | [full] | 1227  | No  | NA  | 0 | 0  | Not-determined | Genome-fragment | NA | 0     |
| S3_vs_k141_29921          | [full] | 1508  | No  | NA  | 0 | 0  | Not-determined | Genome-fragment | NA | 0     |
| S14_vs_k141_8752          | [full] | 1716  | No  | NA  | 0 | 0  | Low-quality    | Genome-fragment | NA | 2.72  |
| S3_vs_k141_29941          | [full] | 2812  | No  | NA  | 0 | 3  | Not-determined | Genome-fragment | NA | 0     |
| S3_vs_k141_15828          | [full] | 1757  | No  | NA  | 0 | 0  | Not-determined | Genome-fragment | NA | 0     |
| S3_vs_k141_86150          | [full] | 2534  | No  | NA  | 0 | 0  | Not-determined | Genome-fragment | NA | 0     |
| S3_vs_k141_44962          | [full] | 1716  | No  | NA  | 0 | 0  | Low-quality    | Genome-fragment | NA | 1.06  |
| S7_vs_53044               | [full] | 1716  | No  | NA  | 1 | 0  | Low-quality    | Genome-fragment | NA | 4.1   |
| S16_vs_13235              | [full] | 1716  | No  | NA  | 0 | 0  | Low-quality    | Genome-fragment | NA | 0.85  |
| S12_extracted_k141_18800  | [full] | 1716  | No  | NA  | 0 | 0  | Low-quality    | Genome-fragment | NA | 2.21  |
| S6_extracted_k141_2020    | [full] | 1716  | No  | NA  | 0 | 0  | Low-quality    | Genome-fragment | NA | 2.5   |
| S3_vs_k141_38105          | [full] | 1695  | No  | NA  | 0 | 0  | Not-determined | Genome-fragment | NA | 0     |
| S3_vs_k141_109944         | [full] | 1552  | No  | NA  | 0 | 0  | Not-determined | Genome-fragment | NA | 0     |
| S3_vs_k141_86250          | [full] | 3442  | No  | NA  | 0 | 2  | Not-determined | Genome-fragment | NA | 0     |
| S11_vs_k141_87060         | [full] | 1717  | Yes | 399 | 1 | 1  | Low-quality    | Genome-fragment | NA | 0.82  |
| S14_vs_k141_33323         | [full] | 1717  | No  | NA  | 3 | 0  | Low-quality    | Genome-fragment | NA | 4.25  |
| S2_vs_k141_38129          | [full] | 1660  | No  | NA  | 0 | 0  | Not-determined | Genome-fragment | NA | 0     |
| S1_vs_k141_156858         | [full] | 1717  | No  | NA  | 0 | 0  | Low-quality    | Genome-fragment | NA | 2.91  |
| S3_vs_k141_5876           | [full] | 3578  | No  | NA  | 0 | 4  | Not-determined | Genome-fragment | NA | 0     |
| S3_vs_k141_125534         | [full] | 1442  | No  | NA  | 0 | 1  | Not-determined | Genome-fragment | NA | 0     |
| S5_vs_k141_61812          | [full] | 1717  | No  | NA  | 4 | 0  | Low-quality    | Genome-fragment | NA | 3.55  |
| S7_extracted_123324       | [full] | 1717  | No  | NA  | 0 | 1  | Low-quality    | Genome-fragment | NA | 2.69  |
| S16_vs_157485             | [full] | 1717  | No  | NA  | 1 | 0  | Low-quality    | Genome-fragment | NA | 1.33  |
| S3_vs_k141_17875          | [full] | 2000  | No  | NA  | 0 | 1  | Not-determined | Genome-fragment | NA | 0     |
| S17_extracted_k141_121113 | [full] | 1718  | Yes | 776 | 1 | 1  | Low-quality    | Genome-fragment | NA | 0.53  |
| S17_extracted_k141_20552  | [full] | 1718  | No  | NA  | 0 | 0  | Low-quality    | Genome-fragment | NA | 4.15  |
| S9_extracted_k141_7071    | [full] | 1718  | No  | NA  | 0 | 0  | Low-quality    | Genome-fragment | NA | 2.04  |
| S3_vs_k141_62885          | [full] | 1074  | No  | NA  | 0 | 3  | Not-determined | Genome-fragment | NA | 0     |
| S11_vs_k141_61885         | [full] | 1718  | No  | NA  | 0 | 0  | Low-quality    | Genome-fragment | NA | 3.61  |
| S16_vs_17682              | [full] | 1718  | No  | NA  | 0 | 0  | Low-quality    | Genome-fragment | NA | 3.32  |
| S16_vs_89329              | [full] | 1718  | No  | NA  | 0 | 0  | Low-quality    | Genome-fragment | NA | 0.78  |
| S3_vs_k141_117742         | [full] | 3782  | No  | NA  | 0 | 3  | Not-determined | Genome-fragment | NA | 0     |
| S14_vs_k141_88490         | [full] | 1719  | No  | NA  | 1 | 0  | Low-quality    | Genome-fragment | NA | 2     |
| S3_vs_k141_86443          | [full] | 3007  | No  | NA  | 0 | 2  | Not-determined | Genome-fragment | NA | 0     |
| S1_extracted_k141_316117  | [full] | 1719  | No  | NA  | 1 | 0  | Low-quality    | Genome-fragment | NA | 5.82  |
| S1_vs_k141_15698          | [full] | 1719  | No  | NA  | 1 | 0  | Low-quality    | Genome-fragment | NA | 3.28  |
| S7_vs_98023               | [full] | 1719  | No  | NA  | 0 | 0  | Low-quality    | Genome-fragment | NA | 3.93  |
| S12_vs_k141_60676         | [full] | 1719  | No  | NA  | 0 | 1  | Low-quality    | Genome-fragment | NA | 1.31  |
| S3_vs_k141_5975           | [full] | 2723  | No  | NA  | 0 | 6  | Not-determined | Genome-fragment | NA | 0     |
| S17_vs_k141_5943          | [full] | 1720  | No  | NA  | 0 | 0  | Low-quality    | Genome-fragment | NA | 2.73  |
| S3_vs_k141_6017           | [full] | 2260  | No  | NA  | 0 | 0  | Not-determined | Genome-fragment | NA | 0     |
| S13_vs_20205              | [full] | 1720  | No  | NA  | 0 | 1  | Low-quality    | Genome-fragment | NA | 1.27  |
| S13_vs_57379              | [full] | 1720  | No  | NA  | 0 | 1  | Low-quality    | Genome-fragment | NA | 2.08  |
| S3_vs_k141_117872         | [full] | 2037  | No  | NA  | 0 | 0  | Not-determined | Genome-fragment | NA | 0     |
| S3_vs_k141_94171          | [full] | 1894  | No  | NA  | 0 | 1  | Not-determined | Genome-fragment | NA | 0     |
| S3_vs_k141_94175          | [full] | 4180  | No  | NA  | 0 | 3  | Not-determined | Genome-fragment | NA | 0     |
| S1_vs_k141_38864          | [full] | 1720  | No  | NA  | 0 | 1  | Low-quality    | Genome-fragment | NA | 3.84  |
| S3_vs_k141_72675          | [full] | 1720  | No  | NA  | 0 | 1  | Low-quality    | Genome-fragment | NA | 2.39  |
| S12_vs_k141_182150        | [full] | 1720  | No  | NA  | 1 | 0  | Low-quality    | Genome-fragment | NA | 5.55  |
| S2_vs_k141_54802          | [full] | 1752  | No  | NA  | 0 | 2  | Not-determined | Genome-fragment | NA | 0     |
| S3_vs_k141_63088          | [full] | 1261  | No  | NA  | 0 | 1  | Not-determined | Genome-fragment | NA | 0     |
| S3_vs_k141_110254         | [full] | 1615  | No  | NA  | 0 | 0  | Not-determined | Genome-fragment | NA | 0     |
| S6_vs_k141_75846          | [full] | 1720  | No  | NA  | 0 | 2  | Low-quality    | Genome-fragment | NA | 1.23  |
| S14_extracted_k141_61453  | [full] | 1721  | No  | NA  | 2 | 0  | Low-quality    | Genome-fragment | NA | 5.67  |
| S3_vs_k141_102812         | [full] | 1721  | No  | NA  | 1 | 0  | Low-quality    | Genome-fragment | NA | 3.16  |
| S3_vs_k141_2436           | [full] | 1721  | No  | NA  | 2 | 0  | Low-quality    | Genome-fragment | NA | 4.55  |
| S5_vs_k141_38804          | [full] | 1721  | No  | NA  | 0 | 0  | Low-quality    | Genome-fragment | NA | 5.02  |
| S7_vs_5291                | [full] | 1721  | No  | NA  | 0 | 0  | Low-quality    | Genome-fragment | NA | 4.05  |
| S12_extracted_k141_144653 | [full] | 1721  | No  | NA  | 0 | 1  | Low-quality    | Genome-fragment | NA | 1.05  |
| S8_extracted_k141_51853   | [full] | 1721  | No  | NA  | 0 | 2  | Not-determined | Genome-fragment | NA | 0.47  |
| S17_extracted_k141_104189 | [full] | 1722  | No  | NA  | 4 | 0  | Low-quality    | Genome-fragment | NA | 5.68  |
| S9_vs_k141_18355          | [full] | 1722  | No  | NA  | 2 | 0  | Low-quality    | Genome-fragment | NA | 3.97  |
| S3_vs_k141_110325         | [full] | 3167  | No  | NA  | 0 | 2  | Not-determined | Genome-fragment | NA | 0     |
| S3_vs_k141_115341         | [full] | 1722  | No  | NA  | 2 | 0  | Low-quality    | Genome-fragment | NA | 4.47  |
| S3_vs_k141_54904          | [full] | 4046  | No  | NA  | 0 | 5  | Not-determined | Genome-fragment | NA | 0     |
| S3_vs_k141_30318          | [full] | 37805 | No  | NA  | 9 | 1  | High-quality   | High-quality    | NA | 92.84 |
| S3_vs_k141_110330         | [full] | 3315  | No  | NA  | 0 | 1  | Not-determined | Genome-fragment | NA | 0     |
| S3_vs_k141_101159         | [full] | 1590  | No  | NA  | 0 | 0  | Not-determined | Genome-fragment | NA | 0     |
| S3_vs_k141_38488          | [full] | 1531  | No  | NA  | 0 | 0  | Not-determined | Genome-fragment | NA | 0     |
| S3_vs_k141_110345         | [full] | 1802  | No  | NA  | 0 | 0  | Not-determined | Genome-fragment | NA | 0     |
| S3_vs_k141_38507          | [full] | 2294  | No  | NA  | 0 | 2  | Not-determined | Genome-fragment | NA | 0     |
| S5_extracted_k141_106708  | [full] | 1722  | No  | NA  | 1 | 0  | Low-quality    | Genome-fragment | NA | 5.08  |
| S5_vs_k141_113821         | [full] | 1722  | No  | NA  | 0 | 0  | Low-quality    | Genome-fragment | NA | 3.66  |
| S5_vs_k141_57880          | [full] | 1722  | No  | NA  | 0 | 0  | Low-quality    | Genome-fragment | NA | 3.05  |
| S15_vs_27464              | [full] | 1722  | No  | NA  | 0 | 1  | Low-quality    | Genome-fragment | NA | 2.82  |
| S17_vs_k141_77311         | [full] | 1723  | No  | NA  | 0 | 2  | Low-quality    | Genome-fragment | NA | 2.24  |
| S11_vs_k141_50037         | [full] | 1723  | No  | NA  | 0 | 0  | Low-quality    | Genome-fragment | NA | 2.79  |
| S3_vs_k141_117912         | [full] | 3068  | No  | NA  | 0 | 2  | Not-determined | Genome-fragment | NA | 0     |
| S3_vs_k141_46414          | [full] | 2602  | No  | NA  | 0 | 2  | Not-determined | Genome-fragment | NA | 0     |
| S14_extracted_k141_75669  | [full] | 1723  | No  | NA  | 0 | 0  | Low-quality    | Genome-fragment | NA | 5.68  |
| S14_vs_k141_108062        | [full] | 1723  | No  | NA  | 0 | 0  | Low-quality    | Genome-fragment | NA | 3.04  |
| S5_vs_k141_114947         | [full] | 1723  | No  | NA  | 0 | 0  | Low-quality    | Genome-fragment | NA | 3.02  |
| S3_vs_k141_63225          | [full] | 8186  | No  | NA  | 0 | 2  | Not-determined | Genome-fragment | NA | 0     |
| S12_vs_k141_127944        | [full] | 1723  | No  | NA  | 1 | 0  | Low-quality    | Genome-fragment | NA | 1.05  |
| S8_vs_k141_48759          | [full] | 1723  | No  | NA  | 1 | 0  | Low-quality    | Genome-fragment | NA | 2.04  |
| S17_vs_k141_40553         | [full] | 1724  | No  | NA  | 2 | 0  | Low-quality    | Genome-fragment | NA | 4.25  |
| S3_vs_k141_101277         | [full] | 1843  | No  | NA  | 0 | 2  | Not-determined | Genome-fragment | NA | 0     |
| S14_extracted_k141_29414  | [full] | 1724  | No  | NA  | 4 | 0  | Low-quality    | Genome-fragment | NA | 5.69  |
| S1_extracted_k141_95084   | [full] | 1724  | No  | NA  | 0 | 0  | Low-quality    | Genome-fragment | NA | 1.84  |
| S3_vs_k141_110405         | [full] | 1171  | No  | NA  | 0 | 1  | Not-determined | Genome-fragment | NA | 0     |
| S10_vs_1980               | [full] | 1724  | No  | NA  | 0 | 0  | Low-quality    | Genome-fragment | NA | 4.45  |
| S3_vs_k141_118022         | [full] | 3220  | No  | NA  | 0 | 1  | Not-determined | Genome-fragment | NA | 0     |
| S2_extracted_k141_20152   | [full] | 1724  | No  | NA  | 0 | 1  | Low-quality    | Genome-fragment | NA | 4.03  |
| S17_extracted_k141_133527 | [full] | 1725  | No  | NA  | 0 | 0  | Low-quality    | Genome-fragment | NA | 1.07  |
| S9_vs_k141_28894          | [full] | 1725  | No  | NA  | 1 | 0  | Low-quality    | Genome-fragment | NA | 4.31  |
| S3_vs_k141_88804          | [full] | 2144  | No  | NA  | 0 | 0  | Not-determined | Genome-fragment | NA | 0     |
| S3_vs_k141_113214         | [full] | 1725  | No  | NA  | 0 | 1  | Low-quality    | Genome-fragment | NA | 1.12  |
| S3_vs_k141_46425          | [full] | 14817 | No  | NA  | 0 | 38 | Not-determined | Genome-fragment | NA | 0     |
| S3_vs_k141_101396         | [full] | 1741  | No  | NA  | 0 | 2  | Not-determined | Genome-fragment | NA | 0     |
| S7_vs_31361               | [full] | 1725  | No  | NA  | 1 | 0  | Low-quality    | Genome-fragment | NA | 5.68  |
| S16_extracted_128144      | [full] | 1725  | No  | NA  | 0 | 0  | Low-quality    | Genome-fragment | NA | 4.68  |
| S16_vs_105480             | [full] | 1725  | No  | NA  | 0 | 0  | Low-quality    | Genome-fragment | NA | 1     |
| S3_vs_k141_55057          | [full] | 1395  | No  | NA  | 0 | 0  | Not-determined | Genome-fragment | NA | 0     |
| S8_vs_k141_54152          | [full] | 1725  | No  | NA  | 1 | 0  | Low-quality    | Genome-fragment | NA | 2.44  |
| S11_vs_k141_34231         | [full] | 1726  | No  | NA  | 1 | 0  | Low-quality    | Genome-fragment | NA | 0.7   |
| S3_vs_k141_101442         | [full] | 1933  | No  | NA  | 0 | 2  | Not-determined | Genome-fragment | NA | 0     |
| S3_vs_k141_86819          | [full] | 2162  | No  | NA  | 0 | 2  | Not-determined | Genome-fragment | NA | 0     |
| S3_vs_k141_110535         | [full] | 2300  | No  | NA  | 0 | 4  | Not-determined | Genome-fragment | NA | 0     |
| S3_vs_k141_21810          | [full] | 2488  | No  | NA  | 0 | 2  | Not-determined | Genome-fragment | NA | 0     |
| S11_vs_k141_47659         | [full] | 1726  | No  | NA  | 0 | 0  | Low-quality    | Genome-fragment | NA | 1.07  |
| S3_vs_k141_94407          | [full] | 1127  | No  | NA  | 0 | 0  | Not-determined | Genome-fragment | NA | 0     |
| S11_vs_k141_57400         | [full] | 1726  | No  | NA  | 0 | 0  | Low-quality    | Genome-fragment | NA | 3.38  |
| S11_vs_k141_43041         | [full] | 1726  | No  | NA  | 0 | 0  | Low-quality    | Genome-fragment | NA | 2.26  |
| S14_vs_k141_31827         | [full] | 1726  | No  | NA  | 2 | 0  | Low-quality    | Genome-fragment | NA | 2.3   |
| S3_extracted_k141_7489    | [full] | 1726  | No  | NA  | 1 | 0  | Low-quality    | Genome-fragment | NA | 3.33  |
| S5_vs_k141_128008         | [full] | 1726  | No  | NA  | 0 | 0  | Low-quality    | Genome-fragment | NA | 3.27  |
| S6_vs_k141_53828          | [full] | 1726  | No  | NA  | 0 | 2  | Low-quality    | Genome-fragment | NA | 2.26  |
| S8_vs_k141_91841          | [full] | 1726  | No  | NA  | 0 | 0  | Low-quality    | Genome-fragment | NA | 4.11  |
| S9_vs_k141_4617           | [full] | 1727  | No  | NA  | 0 | 1  | Low-quality    | Genome-fragment | NA | 3.04  |
| S3_vs_k141_101497         | [full] | 3834  | No  | NA  | 0 | 3  | Not-determined | Genome-fragment | NA | 0     |
| S3_vs_k141_86961          | [full] | 3735  | No  | NA  | 0 | 3  | Not-determined | Genome-fragment | NA | 0     |
| S3_vs_k141_94506          | [full] | 1156  | No  | NA  | 0 | 3  | Not-determined | Genome-fragment | NA | 0     |
| S3_vs_k141_101533         | [full] | 2908  | No  | NA  | 0 | 0  | Not-determined | Genome-fragment | NA | 0     |
| S3_vs_k141_55166          | [full] | 3716  | No  | NA  | 0 | 3  | Not-determined | Genome-fragment | NA | 0     |
| S3_vs_k141_110617         | [full] | 4247  | No  | NA  | 0 | 1  | Not-determined | Genome-fragment | NA | 0     |
| S3_vs_k141_125712         | [full] | 2023  | No  | NA  | 0 | 0  | Not-determined | Genome-fragment | NA | 0     |
| S3_vs_k141_63433          | [full] | 2809  | No  | NA  | 0 | 2  | Not-determined | Genome-fragment | NA | 0     |
| S3_vs_k141_110639         | [full] | 1164  | No  | NA  | 0 | 0  | Not-determined | Genome-fragment | NA | 0     |
| S3_vs_k141_94542          | [full] | 1653  | No  | NA  | 0 | 0  | Not-determined | Genome-fragment | NA | 0     |
| S3_vs_k141_63445          | [full] | 4112  | No  | NA  | 0 | 2  | Not-determined | Genome-fragment | NA | 0     |
| S11_extracted_k141_75102  | [full] | 1727  | No  | NA  | 1 | 0  | Low-quality    | Genome-fragment | NA | 1.17  |
| S1_extracted_k141_27903   | [full] | 1727  | No  | NA  | 1 | 0  | Low-quality    | Genome-fragment | NA | 3.32  |
| S1_extracted_k141_135974  | [full] | 1727  | No  | NA  | 0 | 1  | Low-quality    | Genome-fragment | NA | 0.61  |
| S3_vs_k141_38781          | [full] | 7760  | No  | NA  | 0 | 5  | Not-determined | Genome-fragment | NA | 0     |
| S3_vs_k141_22059          | [full] | 2118  | No  | NA  | 0 | 2  | Not-determined | Gen             |    |       |



|                           |       |    |    |   |   |                |                 |       |   |
|---------------------------|-------|----|----|---|---|----------------|-----------------|-------|---|
| 57_vs_104589  H2gene      | 1729  | No | NA | 0 | 0 | Low-quality    | Genome-fragment | 3.57  | 0 |
| 516_vs_127646  full       | 1729  | No | NA | 0 | 0 | Low-quality    | Genome-fragment | 2.89  | 0 |
| 53_vs_k141_101804  full   | 4441  | No | NA | 0 | 0 | Not-determined | Genome-fragment | NA    | 0 |
| 53_vs_k141_79471  full    | 1519  | No | NA | 0 | 0 | Not-determined | Genome-fragment | NA    | 0 |
| 53_vs_k141_63713  full    | 6892  | No | NA | 0 | 3 | Not-determined | Genome-fragment | NA    | 0 |
| 53_vs_k141_10789  full    | 1862  | No | NA | 0 | 1 | Not-determined | Genome-fragment | NA    | 0 |
| 53_vs_k141_118462  full   | 5711  | No | NA | 0 | 3 | Not-determined | Genome-fragment | NA    | 0 |
| 516_vs_155259  full       | 1729  | No | NA | 0 | 1 | Low-quality    | Genome-fragment | 2.18  | 0 |
| 510_extracted_3481        | 1729  | No | NA | 0 | 0 | Low-quality    | Genome-fragment | 5.02  | 0 |
| 53_vs_k141_55378  full    | 2792  | No | NA | 0 | 1 | Not-determined | Genome-fragment | NA    | 0 |
| 53_vs_k141_22397  full    | 3154  | No | NA | 0 | 3 | Not-determined | Genome-fragment | NA    | 0 |
| 510_extracted_83227       | 1729  | No | NA | 0 | 0 | Low-quality    | Genome-fragment | 4.07  | 0 |
| 53_vs_k141_46961  full    | 2558  | No | NA | 0 | 1 | Not-determined | Genome-fragment | NA    | 0 |
| 53_vs_k141_118501  full   | 1071  | No | NA | 0 | 0 | Not-determined | Genome-fragment | NA    | 0 |
| 510_vs_65641  H2gene      | 1729  | No | NA | 1 | 0 | Low-quality    | Genome-fragment | 4.6   | 0 |
| 53_vs_k141_46980  full    | 6364  | No | NA | 0 | 3 | Not-determined | Genome-fragment | NA    | 0 |
| 53_vs_k141_118517  full   | 1184  | No | NA | 0 | 1 | Not-determined | Genome-fragment | NA    | 0 |
| 53_vs_k141_94913  full    | 1461  | No | NA | 0 | 2 | Not-determined | Genome-fragment | NA    | 0 |
| 512_vs_k141_181802  full  | 1729  | No | NA | 0 | 0 | Low-quality    | Genome-fragment | 2.64  | 0 |
| 58_vs_k141_107642  full   | 1729  | No | NA | 0 | 0 | Low-quality    | Genome-fragment | 7.26  | 0 |
| 53_vs_k141_110910  full   | 1548  | No | NA | 0 | 1 | Not-determined | Genome-fragment | NA    | 0 |
| 53_vs_k141_110912  full   | 1254  | No | NA | 0 | 0 | Not-determined | Genome-fragment | NA    | 0 |
| 58_vs_k141_32388  full    | 1729  | No | NA | 2 | 0 | Low-quality    | Genome-fragment | 5.01  | 0 |
| 53_vs_k141_126004  full   | 1359  | No | NA | 0 | 0 | Not-determined | Genome-fragment | NA    | 0 |
| 53_vs_k141_22419  full    | 4900  | No | NA | 0 | 2 | Not-determined | Genome-fragment | NA    | 0 |
| 53_vs_k141_52453  full    | 5028  | No | NA | 0 | 3 | Not-determined | Genome-fragment | NA    | 0 |
| 53_vs_k141_79585  full    | 2042  | No | NA | 0 | 1 | Not-determined | Genome-fragment | NA    | 0 |
| 58_vs_k141_163994  full   | 1729  | No | NA | 2 | 0 | Low-quality    | Genome-fragment | 6.29  | 0 |
| 53_vs_k141_110971  full   | 1947  | No | NA | 0 | 0 | Not-determined | Genome-fragment | NA    | 0 |
| 514_extracted_k141_46798  | 1730  | No | NA | 2 | 0 | Low-quality    | Genome-fragment | 3.85  | 0 |
| 53_vs_k141_70049  full    | 2075  | No | NA | 0 | 2 | Not-determined | Genome-fragment | NA    | 0 |
| 53_vs_k141_70052  full    | 1355  | No | NA | 0 | 2 | Not-determined | Genome-fragment | NA    | 0 |
| 53_vs_k141_63384  full    | 1730  | No | NA | 0 | 0 | Low-quality    | Genome-fragment | 1.11  | 0 |
| 53_vs_k141_79616  full    | 2138  | No | NA | 0 | 0 | Not-determined | Genome-fragment | NA    | 0 |
| 55_vs_k141_110552  full   | 1730  | No | NA | 0 | 1 | Low-quality    | Genome-fragment | 2.64  | 0 |
| 516_vs_13200  full        | 1730  | No | NA | 0 | 0 | Low-quality    | Genome-fragment | 2.97  | 0 |
| 53_vs_k141_70093  full    | 20643 | No | NA | 5 | 0 | Medium-quality | Genome-fragment | 51.56 | 0 |
| 53_vs_k141_95030  full    | 1576  | No | NA | 0 | 0 | Not-determined | Genome-fragment | NA    | 0 |
| 516_vs_28086  full        | 1730  | No | NA | 0 | 0 | Low-quality    | Genome-fragment | 1.53  | 0 |
| 516_vs_170187  full       | 1730  | No | NA | 1 | 0 | Low-quality    | Genome-fragment | 4.31  | 0 |
| 510_vs_57316  full        | 1730  | No | NA | 0 | 0 | Low-quality    | Genome-fragment | 3.23  | 0 |
| 512_vs_k141_940  full     | 1730  | No | NA | 0 | 0 | Low-quality    | Genome-fragment | 2.27  | 0 |
| 511_vs_k141_36568  full   | 1731  | No | NA | 2 | 0 | Low-quality    | Genome-fragment | 4.05  | 0 |
| 511_extracted_k141_87138  | 1731  | No | NA | 0 | 1 | Low-quality    | Genome-fragment | 0.81  | 0 |
| 53_vs_k141_106172  full   | 1731  | No | NA | 1 | 0 | Low-quality    | Genome-fragment | NA    | 0 |
| 53_vs_k141_70007  full    | 1731  | No | NA | 0 | 0 | Low-quality    | Genome-fragment | 3.75  | 0 |
| 53_vs_k141_95051  full    | 4737  | No | NA | 0 | 4 | Not-determined | Genome-fragment | NA    | 0 |
| 53_vs_k141_118644  full   | 5368  | No | NA | 0 | 4 | Not-determined | Genome-fragment | NA    | 0 |
| 516_extracted_81551       | 1731  | No | NA | 0 | 0 | Low-quality    | Genome-fragment | 1.11  | 0 |
| 58_extracted_k141_331624  | 1731  | No | NA | 0 | 2 | Low-quality    | Genome-fragment | 0.62  | 0 |
| 53_vs_k141_47153  full    | 1278  | No | NA | 0 | 1 | Not-determined | Genome-fragment | NA    | 0 |
| 53_vs_k141_118675  full   | 1618  | No | NA | 0 | 0 | Not-determined | Genome-fragment | NA    | 0 |
| 53_vs_k141_111188  full   | 5421  | No | NA | 0 | 4 | Not-determined | Genome-fragment | NA    | 0 |
| 58_vs_k141_19653  full    | 1731  | No | NA | 0 | 0 | Low-quality    | Genome-fragment | 3.96  | 0 |
| 52_vs_k141_29220  full    | 1025  | No | NA | 0 | 0 | Not-determined | Genome-fragment | NA    | 0 |
| 517_vs_k141_70575  full   | 1732  | No | NA | 0 | 0 | Low-quality    | Genome-fragment | 3.36  | 0 |
| 517_vs_k141_27722  full   | 1732  | No | NA | 1 | 0 | Low-quality    | Genome-fragment | 3.79  | 0 |
| 53_vs_k141_111241  full   | 2037  | No | NA | 0 | 2 | Not-determined | Genome-fragment | NA    | 0 |
| 514_vs_k141_31608  full   | 1732  | No | NA | 0 | 1 | Low-quality    | Genome-fragment | 1.73  | 0 |
| 53_vs_k141_70191  full    | 3369  | No | NA | 0 | 2 | Not-determined | Genome-fragment | NA    | 0 |
| 55_vs_k141_33016  full    | 1732  | No | NA | 0 | 0 | Low-quality    | Genome-fragment | 4.07  | 0 |
| 516_extracted_28997       | 1732  | No | NA | 0 | 0 | Low-quality    | Genome-fragment | 4.3   | 0 |
| 510_extracted_40558       | 1732  | No | NA | 0 | 2 | Low-quality    | Genome-fragment | 0.65  | 0 |
| 517_extracted_k141_111640 | 1733  | No | NA | 1 | 0 | Low-quality    | Genome-fragment | 3.94  | 0 |
| 53_vs_k141_111260  full   | 2594  | No | NA | 0 | 1 | Not-determined | Genome-fragment | NA    | 0 |
| 517_vs_k141_76379  full   | 1733  | No | NA | 0 | 2 | Low-quality    | Genome-fragment | 0.78  | 0 |
| 53_vs_k141_111288  full   | 2748  | No | NA | 0 | 0 | Not-determined | Genome-fragment | NA    | 0 |
| 53_vs_k141_11047  full    | 2927  | No | NA | 0 | 3 | Not-determined | Genome-fragment | NA    | 0 |
| 59_extracted_k141_3394    | 1733  | No | NA | 0 | 0 | Low-quality    | Genome-fragment | 2.53  | 0 |
| 514_extracted_k141_111704 | 1733  | No | NA | 2 | 0 | Low-quality    | Genome-fragment | 5.71  | 0 |
| 514_vs_k141_7574  full    | 1733  | No | NA | 1 | 0 | Low-quality    | Genome-fragment | 2.93  | 0 |
| 514_vs_k141_35378  full   | 1733  | No | NA | 0 | 0 | Low-quality    | Genome-fragment | 3.35  | 0 |
| 516_extracted_49214       | 1733  | No | NA | 0 | 1 | Low-quality    | Genome-fragment | 2.75  | 0 |
| 510_vs_102891  full       | 1733  | No | NA | 0 | 0 | Low-quality    | Genome-fragment | 2.76  | 0 |
| 53_vs_k141_55664  full    | 2899  | No | NA | 1 | 2 | Not-determined | Genome-fragment | NA    | 0 |
| 53_vs_k141_95212  full    | 3725  | No | NA | 0 | 0 | Not-determined | Genome-fragment | NA    | 0 |
| 53_vs_k141_87579  full    | 1898  | No | NA | 0 | 1 | Not-determined | Genome-fragment | NA    | 0 |
| 512_extracted_k141_12534  | 1733  | No | NA | 1 | 0 | Low-quality    | Genome-fragment | 2.72  | 0 |
| 53_vs_k141_39328  full    | 1040  | No | NA | 0 | 0 | Not-determined | Genome-fragment | NA    | 0 |
| 53_vs_k141_39333  full    | 2222  | No | NA | 0 | 2 | Not-determined | Genome-fragment | NA    | 0 |
| 52_extracted_k141_4137    | 1733  | No | NA | 0 | 0 | Low-quality    | Genome-fragment | 4.27  | 0 |
| 517_extracted_k141_140634 | 1734  | No | NA | 0 | 0 | Low-quality    | Genome-fragment | 0.95  | 0 |
| 53_vs_k141_70299  full    | 2828  | No | NA | 0 | 2 | Not-determined | Genome-fragment | NA    | 0 |
| 53_vs_k141_13106  full    | 2532  | No | NA | 0 | 2 | Not-determined | Genome-fragment | NA    | 0 |
| 53_vs_k141_114111  full   | 3795  | No | NA | 0 | 3 | Not-determined | Genome-fragment | NA    | 0 |
| 511_extracted_k141_85140  | 1734  | No | NA | 3 | 0 | Low-quality    | Genome-fragment | 4.63  | 0 |
| 53_vs_k141_70311  full    | 1590  | No | NA | 0 | 1 | Not-determined | Genome-fragment | NA    | 0 |
| 58_vs_k141_22653  full    | 1152  | No | NA | 0 | 0 | Not-determined | Genome-fragment | NA    | 0 |
| 514_vs_k141_2616  full    | 1734  | No | NA | 0 | 0 | Low-quality    | Genome-fragment | 3.34  | 0 |
| 51_vs_k141_128007  full   | 1734  | No | NA | 0 | 0 | Low-quality    | Genome-fragment | 4.16  | 0 |
| 55_vs_k141_66966  full    | 1734  | No | NA | 2 | 0 | Low-quality    | Genome-fragment | 3.8   | 0 |
| 57_vs_127483  full        | 1734  | No | NA | 0 | 0 | Low-quality    | Genome-fragment | 3.64  | 0 |
| 516_vs_138702  full       | 1734  | No | NA | 0 | 0 | Low-quality    | Genome-fragment | 3.12  | 0 |
| 56_extracted_k141_18637   | 1734  | No | NA | 0 | 1 | Low-quality    | Genome-fragment | 1.08  | 0 |
| 53_vs_k141_55777  full    | 3936  | No | NA | 0 | 0 | Not-determined | Genome-fragment | NA    | 0 |
| 53_vs_k141_111767  H2gene | 3936  | No | NA | 1 | 0 | Low-quality    | Genome-fragment | 4.5   | 0 |
| 53_vs_k141_39383  full    | 1427  | No | NA | 0 | 1 | Not-determined | Genome-fragment | NA    | 0 |
| 516_vs_17139  full        | 1735  | No | NA | 0 | 0 | Low-quality    | Genome-fragment | 2.77  | 0 |
| 53_vs_k141_7012  full     | 6311  | No | NA | 4 | 0 | Not-determined | Genome-fragment | NA    | 0 |
| 510_vs_8087  full         | 1735  | No | NA | 1 | 0 | Low-quality    | Genome-fragment | 4.09  | 0 |
| 515_vs_48969  full        | 1735  | No | NA | 0 | 0 | Low-quality    | Genome-fragment | 1.01  | 0 |
| 58_vs_k141_190388  full   | 1735  | No | NA | 0 | 0 | Low-quality    | Genome-fragment | 3.5   | 0 |
| 517_vs_k141_167347  full  | 1736  | No | NA | 0 | 0 | Low-quality    | Genome-fragment | 3.94  | 0 |
| 53_vs_k141_39460  full    | 1556  | No | NA | 0 | 0 | Not-determined | Genome-fragment | NA    | 0 |
| 511_extracted_k141_30385  | 1736  | No | NA | 0 | 0 | Low-quality    | Genome-fragment | 4.28  | 0 |
| 511_vs_k141_87292  H2gene | 1736  | No | NA | 1 | 0 | Low-quality    | Genome-fragment | 4.85  | 0 |
| 52_extracted_k141_6337    | 1736  | No | NA | 0 | 0 | Low-quality    | Genome-fragment | 2.63  | 0 |
| 514_vs_k141_28629  full   | 2737  | No | NA | 3 | 0 | Low-quality    | Genome-fragment | 3.88  | 0 |
| 53_vs_k141_114991  full   | 7778  | No | NA | 0 | 4 | Not-determined | Genome-fragment | NA    | 0 |
| 53_vs_k141_115111  full   | 2112  | No | NA | 0 | 0 | Not-determined | Genome-fragment | NA    | 0 |
| 53_vs_k141_102202  full   | 1368  | No | NA | 0 | 2 | Not-determined | Genome-fragment | NA    | 0 |
| 53_vs_k141_47566  full    | 1065  | No | NA | 0 | 0 | Not-determined | Genome-fragment | NA    | 0 |
| 51_vs_k141_58084  full    | 1737  | No | NA | 1 | 0 | Low-quality    | Genome-fragment | 4.78  | 0 |
| 51_vs_k141_152103  full   | 1737  | No | NA | 0 | 0 | Low-quality    | Genome-fragment | 3.32  | 0 |
| 55_extracted_k141_8924    | 1737  | No | NA | 0 | 0 | Low-quality    | Genome-fragment | 0.91  | 0 |
| 53_vs_k141_22772  full    | 4441  | No | NA | 0 | 2 | Not-determined | Genome-fragment | NA    | 0 |
| 53_vs_k141_102219  full   | 1813  | No | NA | 0 | 7 | Not-determined | Genome-fragment | NA    | 0 |
| 516_vs_102965  full       | 1737  | No | NA | 0 | 0 | Low-quality    | Genome-fragment | 2.9   | 0 |
| 53_vs_k141_102232  full   | 3266  | No | NA | 0 | 1 | Not-determined | Genome-fragment | NA    | 0 |
| 56_vs_k141_32817  full    | 1737  | No | NA | 1 | 0 | Low-quality    | Genome-fragment | 3.8   | 0 |
| 58_extracted_k141_96031   | 1737  | No | NA | 0 | 1 | Low-quality    | Genome-fragment | 1.4   | 0 |
| 53_vs_k141_102238  full   | 2682  | No | NA | 0 | 2 | Not-determined | Genome-fragment | NA    | 0 |
| 58_extracted_k141_74196   | 1737  | No | NA | 0 | 3 | Low-quality    | Genome-fragment | 0.73  | 0 |
| 53_vs_k141_90628  full    | 1737  | No | NA | 2 | 0 | Low-quality    | Genome-fragment | 3.68  | 0 |
| 53_vs_k141_17629  full    | 5227  | No | NA | 0 | 2 | Not-determined | Genome-fragment | NA    | 0 |
| 59_vs_k141_90376  full    | 1738  | No | NA | 0 | 0 | Low-quality    | Genome-fragment | 3.14  | 0 |
| 59_vs_k141_90638  full    | 1738  | No | NA | 0 | 0 | Low-quality    | Genome-fragment | 4.02  | 0 |
| 53_vs_k141_126008  full   | 2458  | No | NA | 0 | 2 | Not-determined | Genome-fragment | NA    | 0 |
| 53_vs_k141_39685  full    | 1926  | No | NA | 0 | 1 | Not-determined | Genome-fragment | NA    | 0 |
| 511_extracted_k141_31859  | 1738  | No | NA | 1 | 0 | Low-quality    | Genome-fragment | 5.09  | 0 |
| 55_vs_k141_38167  full    | 1738  | No | NA | 1 | 0 | Low-quality    | Genome-fragment | 2.5   | 0 |
| 53_vs_k141_95404  full    | 2442  | No | NA | 0 | 2 | Not-determined | Genome-fragment | NA    | 0 |
| 57_extracted_27410        | 1738  | No | NA | 0 | 0 | Low-quality    | Genome-fragment | 4.23  | 0 |
| 53_vs_k141_70508  full    | 5711  | No | NA | 4 | 7 | High-quality   | High-quality    | 1.00  | 0 |
| 57_extracted_68279        | 1738  | No | NA | 2 | 0 | Low-quality    | Genome-fragment | 7.91  | 0 |
| 57_vs_40520  full         | 1738  | No | NA | 1 | 0 | Low-quality    | Genome-fragment | 4.07  | 0 |
| 53_vs_k141_47748  full    | 5247  | No | NA | 0 | 1 | Not-determined | Genome-fragment | NA    | 0 |
| 53_vs_k141_102249  full   | 7117  | No | NA | 0 | 3 | Not-determined | Genome-fragment | NA    | 0 |
| 516_vs_108467  full       | 1738  | No | NA | 1 | 0 | Low-quality    | Genome-fragment | 4.84  | 0 |
| 516_vs_144896  full       | 1738  | No | NA | 0 | 2 | Low-quality    | Genome-fragment | 0.87  | 0 |
| 511_vs_k141_89985  full   | 1739  | No | NA | 0 | 1 | Low-quality    | Genome-fragment | 2.34  | 0 |
| 53_vs_k141_102391  full   | 2425  | No | NA | 1 | 0 | Not-determined | Genome-fragment | NA    | 0 |
| 53_vs_k141_126726  full   | 5577  | No |    |   |   |                |                 |       |   |



|                              |       |     |       |    |                |                 |                 |       |      |
|------------------------------|-------|-----|-------|----|----------------|-----------------|-----------------|-------|------|
| 59_vs_k141_27970  full       | 1741  | No  | NA    | 0  | 0              | Low-quality     | Genome-fragment | 4.11  | 0    |
| 511_vs_k141_91665  full      | 1741  | No  | NA    | 0  | 1              | Low-quality     | Genome-fragment | 1.1   | 0    |
| 55_vs_k141_15309  In2gene    | 1741  | No  | NA    | 2  | 0              | Low-quality     | Genome-fragment | 0.94  | 0    |
| 53_vs_k141_71046  full       | 2903  | No  | NA    | 0  | 3              | Not-determined  | Genome-fragment | NA    | 0    |
| 53_vs_k141_13364  full       | 6092  | No  | NA    | 0  | 3              | Not-determined  | Genome-fragment | NA    | 0    |
| 57_extracted_1624            | 1741  | No  | NA    | 0  | 0              | Low-quality     | Genome-fragment | 1.81  | 0    |
| 512_vs_k141_139783  full     | 1741  | No  | NA    | 0  | 0              | Low-quality     | Genome-fragment | 2.1   | 0    |
| 55_extracted_k141_74748      | 1742  | No  | NA    | 0  | 0              | Low-quality     | Genome-fragment | 4.95  | 0    |
| 53_vs_k141_119216  full      | 4861  | No  | NA    | 5  | Not-determined | Genome-fragment | NA              | 0     | 0    |
| 57_vs_37434  full            | 1742  | No  | NA    | 1  | 0              | Low-quality     | Genome-fragment | 5.21  | 0    |
| 57_vs_67644  full            | 1742  | No  | NA    | 0  | 0              | Low-quality     | Genome-fragment | 1.16  | 0    |
| 510_extracted_109253         | 1742  | No  | NA    | 0  | 0              | Low-quality     | Genome-fragment | 2.27  | 0    |
| 512_extracted_k141_128704    | 1742  | No  | NA    | 0  | 2              | Low-quality     | Genome-fragment | 0.44  | 0    |
| 54_extracted_28940           | 1742  | No  | NA    | 0  | 1              | Low-quality     | Genome-fragment | 1.15  | 0    |
| 56_vs_k141_25987  full       | 1742  | No  | NA    | 0  | 1              | Low-quality     | Genome-fragment | 1.79  | 0    |
| 59_vs_k141_88332  full       | 1743  | No  | NA    | 0  | 1              | Low-quality     | Genome-fragment | 0.59  | 0    |
| 511_vs_k141_32722  full      | 1743  | No  | NA    | 0  | 0              | Low-quality     | Genome-fragment | 2.7   | 0    |
| 514_extracted_k141_66159     | 1743  | No  | NA    | 2  | 0              | Low-quality     | Genome-fragment | 5.76  | 0    |
| 52_vs_k141_127088  full      | 4976  | No  | NA    | 0  | 2              | Not-determined  | Genome-fragment | NA    | 0    |
| 53_vs_k141_127093  full      | 1224  | No  | NA    | 0  | 1              | Not-determined  | Genome-fragment | NA    | 0    |
| 51_vs_k141_120115  full      | 1743  | No  | NA    | 2  | 0              | Low-quality     | Genome-fragment | 4.5   | 0    |
| 53_vs_k141_119306  full      | 1767  | No  | NA    | 0  | 0              | Not-determined  | Genome-fragment | NA    | 0    |
| 53_vs_k141_99577  full       | 1743  | No  | NA    | 0  | 0              | Low-quality     | Genome-fragment | 2.21  | 0    |
| 53_vs_k141_23544  full       | 5566  | No  | NA    | 0  | 1              | Not-determined  | Genome-fragment | NA    | 0    |
| 55_vs_k141_29954  full       | 1743  | No  | NA    | 0  | 0              | Low-quality     | Genome-fragment | 3.08  | 0    |
| 516_extracted_160096         | 1743  | No  | NA    | 0  | 0              | Low-quality     | Genome-fragment | 3.01  | 0    |
| 516_vs_36708  full           | 1743  | No  | NA    | 0  | 1              | Low-quality     | Genome-fragment | 2.62  | 0    |
| 53_vs_k141_7948  full        | 5076  | No  | NA    | 0  | 3              | Not-determined  | Genome-fragment | NA    | 0    |
| 53_vs_k141_23597  full       | 6554  | No  | NA    | 0  | 4              | Not-determined  | Genome-fragment | NA    | 0    |
| 512_vs_k141_5790  full       | 1743  | No  | NA    | 1  | 0              | Low-quality     | Genome-fragment | 2.94  | 0    |
| 53_vs_k141_103061  full      | 1046  | No  | NA    | 0  | 0              | Not-determined  | Genome-fragment | NA    | 0    |
| 58_extracted_k141_43481      | 1743  | No  | NA    | 0  | 0              | Low-quality     | Genome-fragment | 3.87  | 0    |
| 53_vs_k141_71439  full       | 2470  | No  | NA    | 0  | 3              | Not-determined  | Genome-fragment | NA    | 0    |
| 58_extracted_k141_141002     | 1743  | No  | NA    | 0  | 1              | Low-quality     | Genome-fragment | 2.79  | 0    |
| 58_vs_k141_51188  full       | 1743  | No  | NA    | 0  | 0              | Low-quality     | Genome-fragment | 3.07  | 0    |
| 53_vs_k141_116791  full      | 2613  | No  | NA    | 0  | 0              | Not-determined  | Genome-fragment | NA    | 0    |
| 53_vs_k141_127319  full      | 1975  | No  | NA    | 0  | 0              | Not-determined  | Genome-fragment | NA    | 0    |
| 53_vs_k141_127360  full      | 1333  | No  | NA    | 0  | 1              | Not-determined  | Genome-fragment | NA    | 0    |
| 517_vs_k141_63043  full      | 1744  | No  | NA    | 0  | 0              | Low-quality     | Genome-fragment | 2.5   | 0    |
| 53_vs_k141_127387  full      | 28569 | No  | NA    | 12 | 0              | Medium-quality  | Genome-fragment | 74.37 | 0    |
| 53_vs_k141_127388  full      | 1797  | No  | NA    | 0  | 1              | Not-determined  | Genome-fragment | NA    | 0    |
| 53_vs_k141_23831  full       | 5020  | No  | NA    | 0  | 3              | Not-determined  | Genome-fragment | NA    | 0    |
| 53_vs_k141_103298  full      | 2917  | No  | NA    | 0  | 2              | Not-determined  | Genome-fragment | NA    | 0    |
| 53_vs_k141_71620  full       | 2817  | No  | NA    | 0  | 1              | Not-determined  | Genome-fragment | NA    | 0    |
| 511_vs_k141_59093  full      | 1744  | No  | NA    | 1  | 0              | Low-quality     | Genome-fragment | 2.87  | 0    |
| 53_vs_k141_103368  full      | 1683  | No  | NA    | 0  | 1              | Not-determined  | Genome-fragment | NA    | 0    |
| 53_vs_k141_71690  full       | 1269  | No  | NA    | 0  | 1              | Not-determined  | Genome-fragment | NA    | 0    |
| 53_vs_k141_103411  full      | 5302  | No  | NA    | 0  | 4              | Not-determined  | Genome-fragment | NA    | 0    |
| 53_vs_k141_141511  full      | 1744  | No  | NA    | 0  | 0              | Low-quality     | Genome-fragment | 1.66  | 0    |
| 55_vs_k141_87961  full       | 1744  | No  | NA    | 1  | 0              | Low-quality     | Genome-fragment | 3.96  | 0    |
| 53_vs_k141_87728  0_partial  | 15881 | No  | NA    | 3  | 1              | Medium-quality  | Genome-fragment | 55.35 | 0    |
| 52_vs_k141_16071  0_partial  | 23004 | No  | NA    | 17 | Not-determined | Genome-fragment | NA              | 0     | 0    |
| 53_vs_k141_40939  0_partial  | 44878 | Yes | 42098 | 3  | 7              | Medium-quality  | Genome-fragment | 68.69 | 6.19 |
| 53_vs_k141_40939  1_partial  | 15072 | No  | NA    | 0  | 6              | Not-determined  | Genome-fragment | NA    | 0    |
| 57_vs_46511  In2gene         | 1744  | No  | NA    | 0  | 0              | Low-quality     | Genome-fragment | 2.26  | 0    |
| 58_extracted_k141_13112      | 1744  | No  | NA    | 0  | 0              | Low-quality     | Genome-fragment | 1.44  | 0    |
| 53_vs_k141_122047  0_partial | 14833 | No  | NA    | 0  | 6              | Not-determined  | Genome-fragment | NA    | 0    |
| 58_vs_k141_38072  full       | 1744  | No  | NA    | 1  | 0              | Low-quality     | Genome-fragment | 1     | 0    |
| 53_vs_k141_82962  0_partial  | 11332 | No  | NA    | 0  | 7              | Not-determined  | Genome-fragment | NA    | 0    |
| 517_vs_k141_11203  full      | 1745  | No  | NA    | 0  | 0              | Low-quality     | Genome-fragment | 2.15  | 0    |
| 59_vs_k141_19428  full       | 1745  | No  | NA    | 1  | 0              | Low-quality     | Genome-fragment | 3.16  | 0    |
| 53_vs_k141_37101  0_partial  | 14536 | No  | NA    | 0  | 11             | Not-determined  | Genome-fragment | NA    | 0    |
| 53_vs_k141_43757  0_partial  | 17443 | No  | NA    | 0  | 7              | Not-determined  | Genome-fragment | NA    | 0    |
| 53_vs_k141_19171  0_partial  | 10012 | No  | NA    | 0  | 5              | Not-determined  | Genome-fragment | NA    | 0    |
| 511_vs_k141_74867  full      | 1745  | No  | NA    | 0  | 0              | Low-quality     | Genome-fragment | 3.89  | 0    |
| 53_vs_k141_36691  0_partial  | 12386 | No  | NA    | 0  | 3              | Not-determined  | Genome-fragment | NA    | 0    |
| 57_vs_50406  full            | 1745  | No  | NA    | 0  | 0              | Low-quality     | Genome-fragment | 3.51  | 0    |
| 53_vs_k141_68122  0_partial  | 28940 | No  | NA    | 0  | 13             | Not-determined  | Genome-fragment | NA    | 0    |
| 53_vs_k141_85076  0_partial  | 11247 | No  | NA    | 0  | 3              | Not-determined  | Genome-fragment | NA    | 0    |
| 53_vs_k141_124525  0_partial | 21186 | No  | NA    | 0  | 15             | Not-determined  | Genome-fragment | NA    | 0    |
| 53_vs_k141_117894  0_partial | 56521 | No  | NA    | 2  | 15             | Medium-quality  | Genome-fragment | 73.03 | 0    |
| 516_vs_34408  full           | 1745  | No  | NA    | 0  | 0              | Low-quality     | Genome-fragment | 1.44  | 0    |
| 53_vs_k141_71320  0_partial  | 16672 | No  | NA    | 0  | 2              | Not-determined  | Genome-fragment | NA    | 0    |
| 53_vs_k141_103464  0_partial | 28172 | No  | NA    | 0  | 10             | Not-determined  | Genome-fragment | NA    | 0    |
| 512_vs_k141_62362  full      | 1745  | No  | NA    | 0  | 0              | Low-quality     | Genome-fragment | 32.82 | 0    |
| 58_extracted_k141_114192     | 1745  | No  | NA    | 0  | 0              | Low-quality     | Genome-fragment | 4.11  | 0    |
| 58_vs_k141_171477  In2gene   | 1745  | No  | NA    | 0  | 0              | Low-quality     | Genome-fragment | 4.11  | 0    |
| 511_extracted_k141_70135     | 1746  | No  | NA    | 0  | 2              | Low-quality     | Genome-fragment | 1.16  | 0    |
| 511_vs_k141_98006  full      | 1746  | No  | NA    | 0  | 0              | Low-quality     | Genome-fragment | 3.04  | 0    |
| 513_extracted_43087          | 1746  | No  | NA    | 0  | 0              | Low-quality     | Genome-fragment | 1.81  | 0    |
| 511_extracted_k141_66519     | 1746  | No  | NA    | 0  | 0              | Low-quality     | Genome-fragment | 2.82  | 0    |
| 53_vs_k141_96304  In2gene    | 1157  | No  | NA    | 0  | 0              | Not-determined  | Genome-fragment | NA    | 0    |
| 55_vs_k141_11461  full       | 1746  | No  | NA    | 2  | 0              | Low-quality     | Genome-fragment | 4.19  | 0    |
| 55_vs_k141_102354  full      | 1746  | No  | NA    | 2  | 0              | Low-quality     | Genome-fragment | 3.79  | 0    |
| 516_vs_17902  full           | 1746  | No  | NA    | 0  | 0              | Low-quality     | Genome-fragment | 3.3   | 0    |
| 512_vs_k141_82435  full      | 1746  | No  | NA    | 1  | 0              | Low-quality     | Genome-fragment | 0.16  | 0    |
| 54_extracted_17976           | 1746  | No  | NA    | 0  | 2              | Low-quality     | Genome-fragment | 0.61  | 0    |
| 58_extracted_k141_23200      | 1746  | No  | NA    | 0  | 0              | Low-quality     | Genome-fragment | 2.61  | 0    |
| 59_extracted_k141_69070      | 1747  | No  | NA    | 0  | 0              | Low-quality     | Genome-fragment | 4.31  | 0    |
| 511_vs_k141_18152  full      | 1747  | No  | NA    | 0  | 0              | Low-quality     | Genome-fragment | 1.19  | 0    |
| 514_extracted_k141_30080     | 1747  | No  | NA    | 3  | 0              | Low-quality     | Genome-fragment | 5.11  | 0    |
| 51_vs_k141_144640  full      | 1747  | No  | NA    | 0  | 0              | Low-quality     | Genome-fragment | 1.11  | 0    |
| 51_vs_k141_59390  full       | 1747  | No  | NA    | 0  | 0              | Low-quality     | Genome-fragment | 3.51  | 0    |
| 53_vs_k141_41177  In2gene    | 1284  | No  | NA    | 0  | 0              | Not-determined  | Genome-fragment | NA    | 0    |
| 53_vs_k141_122709  In2gene   | 1349  | No  | NA    | 0  | 0              | Low-quality     | Genome-fragment | NA    | 0    |
| 57_vs_79327  full            | 1747  | No  | NA    | 0  | 0              | Low-quality     | Genome-fragment | 1.02  | 0    |
| 53_vs_k141_97482  In2gene    | 1028  | No  | NA    | 0  | 0              | Not-determined  | Genome-fragment | NA    | 0    |
| 516_extracted_79133          | 1747  | No  | NA    | 4  | 0              | Low-quality     | Genome-fragment | 2.68  | 0    |
| 512_vs_k141_186283  full     | 1747  | No  | NA    | 0  | 0              | Low-quality     | Genome-fragment | 2.44  | 0    |
| 513_vs_97403  full           | 1748  | No  | NA    | 0  | 2              | Low-quality     | Genome-fragment | 0.9   | 0    |
| 514_vs_k141_59115  full      | 1748  | No  | NA    | 0  | 2              | Low-quality     | Genome-fragment | 2.16  | 0    |
| 53_vs_k141_105338  In2gene   | 1651  | No  | NA    | 0  | 0              | Not-determined  | Genome-fragment | NA    | 0    |
| 51_extracted_k141_36324      | 1748  | No  | NA    | 0  | 0              | Low-quality     | Genome-fragment | 1.21  | 0    |
| 51_vs_k141_151566  full      | 1748  | No  | NA    | 1  | 0              | Low-quality     | Genome-fragment | 3.62  | 0    |
| 53_vs_k141_82061  In2gene    | 1790  | No  | NA    | 0  | 0              | Not-determined  | Genome-fragment | NA    | 0    |
| 55_vs_k141_135494  full      | 1748  | No  | NA    | 1  | 0              | Low-quality     | Genome-fragment | 3.89  | 0    |
| 53_vs_k141_50606  In2gene    | 1214  | No  | NA    | 0  | 0              | Not-determined  | Genome-fragment | NA    | 0    |
| 53_vs_k141_146681  In2gene   | 3460  | No  | NA    | 0  | 0              | Not-determined  | Genome-fragment | NA    | 0    |
| 53_vs_k141_74963  In2gene    | 1225  | No  | NA    | 0  | 0              | Not-determined  | Genome-fragment | NA    | 0    |
| 516_vs_119473  full          | 1748  | No  | NA    | 0  | 1              | Low-quality     | Genome-fragment | 1.3   | 0    |
| 58_extracted_k141_17388      | 1748  | No  | NA    | 0  | 1              | Low-quality     | Genome-fragment | 0.19  | 0    |
| 58_extracted_k141_155027     | 1748  | No  | NA    | 0  | 0              | Low-quality     | Genome-fragment | 2.61  | 0    |
| 517_vs_k141_86876  full      | 1749  | No  | NA    | 0  | 0              | Low-quality     | Genome-fragment | 3.32  | 0    |
| 514_vs_k141_28891  full      | 1749  | No  | NA    | 0  | 1              | Low-quality     | Genome-fragment | 2.86  | 0    |
| 57_vs_54897  full            | 1749  | No  | NA    | 0  | 0              | Low-quality     | Genome-fragment | 4.22  | 0    |
| 516_vs_123691  full          | 1749  | No  | NA    | 0  | 0              | Low-quality     | Genome-fragment | 4.26  | 0    |
| 53_vs_k141_18582  In2gene    | 1387  | No  | NA    | 0  | 0              | Not-determined  | Genome-fragment | NA    | 0    |
| 515_extracted_77440          | 1749  | No  | NA    | 0  | 0              | Low-quality     | Genome-fragment | 2.93  | 0    |
| 58_vs_k141_129251  full      | 1749  | No  | NA    | 0  | 0              | Low-quality     | Genome-fragment | 5.59  | 0    |
| 59_extracted_k141_59297      | 1750  | No  | NA    | 0  | 1              | Low-quality     | Genome-fragment | 0.55  | 0    |
| 59_vs_k141_57504  full       | 1750  | No  | NA    | 0  | 1              | Low-quality     | Genome-fragment | 3.33  | 0    |
| 513_vs_10423  full           | 1750  | No  | NA    | 0  | 0              | Low-quality     | Genome-fragment | 3.01  | 0    |
| 53_extracted_k141_91764      | 1750  | No  | NA    | 0  | 0              | Low-quality     | Genome-fragment | 0.97  | 0    |
| 510_vs_37752  full           | 1750  | No  | NA    | 2  | 0              | Low-quality     | Genome-fragment | 2.79  | 0    |
| 510_vs_122322  full          | 1750  | No  | NA    | 0  | 0              | Low-quality     | Genome-fragment | 1.52  | 0    |
| 515_vs_38445  full           | 1750  | No  | NA    | 0  | 0              | Low-quality     | Genome-fragment | 4.41  | 0    |
| 56_extracted_k141_13931      | 1750  | No  | NA    | 3  | 0              | Low-quality     | Genome-fragment | 11.77 | 0    |
| 511_vs_k141_79853  full      | 1751  | No  | NA    | 0  | 0              | Low-quality     | Genome-fragment | 0.77  | 0    |
| 514_vs_k141_101576  full     | 1751  | No  | NA    | 0  | 0              | Low-quality     | Genome-fragment | 2.83  | 0    |
| 51_vs_k141_139452  full      | 1751  | No  | NA    | 1  | 0              | Low-quality     | Genome-fragment | 6     | 0    |
| 53_vs_k141_123228  In2gene   | 1215  | No  | NA    | 0  | 0              | Not-determined  | Genome-fragment | NA    | 0    |
| 53_vs_k141_18334  In2gene    | 1753  | No  | NA    | 0  | 0              | Not-determined  | Genome-fragment | NA    | 0    |
| 53_extracted_k141_27978      | 1751  | No  | NA    | 0  | 0              | Low-quality     | Genome-fragment | 1.52  | 0    |
| 57_vs_38579  full            | 1751  | No  | NA    | 3  | 0              | Low-quality     | Genome-fragment | 4.35  | 0    |
| 516_vs_57608  full           | 1751  | No  | NA    | 2  | 0              | Low-quality     | Genome-fragment | 3.57  | 0    |
| 510_vs_82286  full           | 1751  | No  | NA    | 4  | 0              | Low-quality     | Genome-fragment | 3.91  | 0    |
| 58_extracted_k141_56621      | 1751  | No  | NA    | 0  | 2              | Low-quality     | Genome-fragment | 0.5   | 0    |
| 53_vs_k141_53356  In2gene    | 1213  | No  | NA    | 0  | 0              | Not-determined  | Genome-fragment | NA    | 0    |
| 58_extracted_k141_172207     | 1751  | No  | NA    | 0  | 1              | Low-quality     | Genome-fragment | 0.48  | 0    |
| 53_vs_k141_20410  In2gene    | 1432  | No  | NA    | 0  | 1              | Not-determined  | Genome-fragment | NA    | 0    |
| 58_vs_k141_103756  full      | 1751  | No  | NA    | 0  | 0              | Low-quality     | Genome-fragment | 3.31  | 0    |
| 59_vs_k141_84342  full       | 175   |     |       |    |                |                 |                 |       |      |



|                           |       |     |    |     |   |                |                 |       |       |
|---------------------------|-------|-----|----|-----|---|----------------|-----------------|-------|-------|
| S10_vs_358751 full        | 1755  | No  | NA | 2   | 0 | Low-quality    | Genome-fragment | 2.62  | 0     |
| S5_extracted_k141_42581   | 1799  | No  | NA | 1   | 0 | Not-determined | Genome-fragment | NA    | 0     |
| S5_extracted_k141_85063   | 2874  | No  | NA | 0   | 4 | Not-determined | Genome-fragment | NA    | 0     |
| S5_extracted_k141_54688   | 1174  | No  | NA | 0   | 1 | Not-determined | Genome-fragment | NA    | 0     |
| S10_vs_85338 full         | 1755  | No  | NA | 0   | 1 | Low-quality    | Genome-fragment | 2.45  | 0     |
| S5_extracted_k141_24324   | 4805  | No  | NA | 0   | 3 | Not-determined | Genome-fragment | NA    | 0     |
| S8_extracted_k141_128105  | 1755  | No  | NA | 0   | 0 | Low-quality    | Genome-fragment | 3.63  | 0     |
| S5_extracted_k141_12197   | 1640  | No  | NA | 0   | 2 | Not-determined | Genome-fragment | NA    | 0     |
| S17_extracted_k141_6179   | 1756  | No  | NA | 0   | 1 | Low-quality    | Genome-fragment | 4.28  | 0     |
| S17_extracted_k141_124501 | 1756  | No  | NA | 1   | 0 | Low-quality    | Genome-fragment | 2.63  | 0     |
| S17_vs_k141_51869 full    | 1756  | Yes | NA | 1   | 1 | Low-quality    | Genome-fragment | 0.27  | 71.13 |
| S5_extracted_k141_85071   | 1159  | No  | NA | 0   | 1 | Not-determined | Genome-fragment | NA    | 0     |
| S9_vs_k141_38148 full     | 1756  | No  | NA | 0   | 0 | Low-quality    | Genome-fragment | 1.16  | 0     |
| S5_extracted_k141_139765  | 3163  | No  | NA | 0   | 2 | Not-determined | Genome-fragment | NA    | 0     |
| S9_vs_k141_64223 full     | 1756  | No  | NA | 0   | 1 | Low-quality    | Genome-fragment | 4.21  | 0     |
| S5_extracted_k141_6233    | 3149  | No  | NA | 0   | 1 | Not-determined | Genome-fragment | NA    | 0     |
| S1_vs_k141_127397 full    | 1756  | No  | NA | 0   | 2 | Low-quality    | Genome-fragment | 1.08  | 0     |
| S5_extracted_k141_60928   | 3426  | No  | NA | 0   | 0 | Not-determined | Genome-fragment | NA    | 0     |
| S1_vs_k141_108858 full    | 1756  | No  | NA | 0   | 1 | Low-quality    | Genome-fragment | 3.71  | 0     |
| S5_extracted_k141_121571  | 1650  | No  | NA | 0   | 1 | Not-determined | Genome-fragment | NA    | 0     |
| S5_extracted_k141_48695   | 1739  | No  | NA | 0   | 1 | Not-determined | Genome-fragment | NA    | 0     |
| S5_extracted_k141_42740   | 1457  | No  | NA | 0   | 1 | Not-determined | Genome-fragment | NA    | 0     |
| S5_extracted_k141_127640  | 3197  | No  | NA | 0   | 0 | Not-determined | Genome-fragment | NA    | 0     |
| S1_vs_k141_4459 full      | 1756  | No  | NA | 1   | 0 | Low-quality    | Genome-fragment | 4.08  | 0     |
| S5_extracted_k141_133853  | 1140  | No  | NA | 0   | 1 | Not-determined | Genome-fragment | NA    | 0     |
| S5_extracted_k141_133656  | 1311  | No  | NA | 0   | 0 | Not-determined | Genome-fragment | NA    | 0     |
| S5_extracted_k141_97312   | 1216  | No  | NA | 0   | 2 | Not-determined | Genome-fragment | NA    | 0     |
| S5_vs_k141_134549 full    | 1756  | No  | NA | 1   | 0 | Low-quality    | Genome-fragment | 2.66  | 0     |
| S5_vs_k141_136564 full    | 1756  | No  | NA | 0   | 0 | Low-quality    | Genome-fragment | 2.31  | 0     |
| S16_extracted_51657       | 1756  | No  | NA | 0   | 1 | Low-quality    | Genome-fragment | 3.43  | 0     |
| S5_extracted_k141_6338    | 3886  | No  | NA | 0   | 1 | Not-determined | Genome-fragment | NA    | 0     |
| S16_vs_15233 full         | 1756  | Yes | NA | 1   | 1 | Low-quality    | Genome-fragment | 2.28  | 38.38 |
| S5_extracted_k141_139892  | 1217  | No  | NA | 0   | 0 | Not-determined | Genome-fragment | NA    | 0     |
| S5_extracted_k141_6349    | 6135  | No  | NA | 0   | 4 | Not-determined | Genome-fragment | NA    | 0     |
| S16_vs_150061 l 2gene     | 1756  | No  | NA | 1   | 0 | Low-quality    | Genome-fragment | 3.32  | 0     |
| S5_extracted_k141_18461   | 28821 | No  | NA | 0   | 1 | Medium-quality | Genome-fragment | 56.09 | 0     |
| S5_extracted_k141_48749   | 2179  | No  | NA | 0   | 1 | Not-determined | Genome-fragment | NA    | 0     |
| S5_extracted_k141_127686  | 1074  | No  | NA | 0   | 1 | Not-determined | Genome-fragment | NA    | 0     |
| S8_vs_k141_131525 full    | 1756  | No  | NA | 0   | 1 | Low-quality    | Genome-fragment | 2.82  | 0     |
| S5_extracted_k141_18473   | 3679  | No  | NA | 0   | 4 | Not-determined | Genome-fragment | NA    | 0     |
| S8_vs_k141_137612 full    | 1756  | No  | NA | 1   | 0 | Low-quality    | Genome-fragment | 2.63  | 0     |
| S5_extracted_k141_73014   | 1020  | No  | NA | 2   | 2 | Not-determined | Genome-fragment | NA    | 0     |
| S13_vs_98144 full         | 1757  | No  | NA | 0   | 2 | Low-quality    | Genome-fragment | 4.28  | 0     |
| S5_extracted_k141_115464  | 6817  | No  | NA | 0   | 1 | Not-determined | Genome-fragment | NA    | 0     |
| S14_extracted_k141_13741  | 1757  | No  | NA | 1   | 0 | Low-quality    | Genome-fragment | 1.11  | 0     |
| S5_extracted_k141_18487   | 1135  | No  | NA | 0   | 1 | Not-determined | Genome-fragment | NA    | 0     |
| S16_extracted_4680        | 1757  | No  | NA | 0   | 0 | Low-quality    | Genome-fragment | 3.48  | 0     |
| S5_extracted_k141_61053   | 3447  | No  | NA | 0   | 0 | Not-determined | Genome-fragment | NA    | 0     |
| S12_vs_k141_94023 full    | 1757  | No  | NA | 0   | 1 | Low-quality    | Genome-fragment | 2.93  | 0     |
| S5_extracted_k141_121816  | 1047  | No  | NA | 0   | 0 | Not-determined | Genome-fragment | NA    | 0     |
| S5_extracted_k141_127742  | 3728  | No  | NA | 0   | 1 | Not-determined | Genome-fragment | NA    | 0     |
| S5_extracted_k141_24462   | 1107  | No  | NA | 0   | 1 | Not-determined | Genome-fragment | NA    | 0     |
| S5_extracted_k141_6500    | 4103  | No  | NA | 0   | 1 | Not-determined | Genome-fragment | NA    | 0     |
| S5_extracted_k141_91311   | 2476  | No  | NA | 0   | 0 | Not-determined | Genome-fragment | NA    | 0     |
| S5_extracted_k141_424     | 1025  | No  | NA | 0   | 1 | Not-determined | Genome-fragment | NA    | 0     |
| S5_extracted_k141_26471   | 1889  | No  | NA | 0   | 1 | Not-determined | Genome-fragment | NA    | 0     |
| S12_vs_k141_76072 full    | 1757  | No  | NA | 0   | 0 | Low-quality    | Genome-fragment | 5.05  | 0     |
| S5_extracted_k141_6506    | 23722 | No  | NA | 14  | 0 | Medium-quality | Genome-fragment | 50.94 | 0     |
| S5_extracted_k141_451     | 1178  | No  | NA | 0   | 1 | Not-determined | Genome-fragment | NA    | 0     |
| S3_extracted_k141_116361  | 1758  | No  | NA | 0   | 0 | Low-quality    | Genome-fragment | 1.26  | 0     |
| S5_extracted_k141_43007   | 1982  | No  | NA | 0   | 1 | Not-determined | Genome-fragment | NA    | 0     |
| S3_vs_k141_14766 full     | 1758  | No  | NA | 0   | 0 | Low-quality    | Genome-fragment | 2.53  | 0     |
| S10_vs_86092 full         | 1758  | No  | NA | 1   | 0 | Low-quality    | Genome-fragment | 2.64  | 0     |
| S5_extracted_k141_48879   | 1526  | No  | NA | 0   | 3 | Not-determined | Genome-fragment | NA    | 0     |
| S8_extracted_k141_12103   | 1758  | No  | NA | 2   | 1 | Low-quality    | Genome-fragment | 6.18  | 0     |
| S17_vs_k141_174964 full   | 1759  | No  | NA | 0   | 0 | Low-quality    | Genome-fragment | 1.65  | 0     |
| S9_vs_k141_53854 full     | 1759  | No  | NA | 4   | 0 | Low-quality    | Genome-fragment | 4.64  | 0     |
| S5_extracted_k141_6569    | 1078  | No  | NA | 0   | 0 | Not-determined | Genome-fragment | NA    | 0     |
| S18_vs_5882 full          | 1759  | No  | NA | 0   | 0 | Low-quality    | Genome-fragment | 1.04  | 0     |
| S5_extracted_k141_133744  | 2253  | No  | NA | 0   | 0 | Not-determined | Genome-fragment | NA    | 0     |
| S5_extracted_k141_97443   | 9336  | No  | NA | 0   | 4 | Not-determined | Genome-fragment | NA    | 0     |
| S13_vs_58884 full         | 1759  | No  | NA | 0   | 0 | Low-quality    | Genome-fragment | 3.81  | 0     |
| S14_vs_k141_66679 full    | 1759  | No  | NA | 0   | 1 | Low-quality    | Genome-fragment | 1.57  | 0     |
| S5_extracted_k141_115757  | 1437  | No  | NA | 0   | 0 | Not-determined | Genome-fragment | NA    | 0     |
| S16_vs_2049 full          | 1759  | Yes | NA | 843 | 1 | Low-quality    | Genome-fragment | 1.44  | 52.08 |
| S8_vs_k141_122567 full    | 1759  | No  | NA | 0   | 0 | Low-quality    | Genome-fragment | 4.31  | 0     |
| S5_extracted_k141_43142   | 7712  | No  | NA | 0   | 1 | Not-determined | Genome-fragment | NA    | 0     |
| S5_extracted_k141_659     | 3239  | No  | NA | 0   | 0 | Not-determined | Genome-fragment | NA    | 0     |
| S5_extracted_k141_91509   | 3029  | No  | NA | 0   | 0 | Not-determined | Genome-fragment | NA    | 0     |
| S3_vs_k141_59052 full     | 1760  | No  | NA | 2   | 0 | Low-quality    | Genome-fragment | 4.71  | 0     |
| S5_extracted_k141_122091  | 1297  | No  | NA | 0   | 1 | Not-determined | Genome-fragment | NA    | 0     |
| S5_extracted_k141_30830   | 1211  | No  | NA | 0   | 0 | Not-determined | Genome-fragment | NA    | 0     |
| S5_extracted_k141_733     | 1141  | No  | NA | 0   | 0 | Not-determined | Genome-fragment | NA    | 0     |
| S5_vs_k141_115631 full    | 1760  | No  | NA | 0   | 0 | Low-quality    | Genome-fragment | 3.86  | 0     |
| S7_vs_36876 full          | 1760  | No  | NA | 0   | 0 | Low-quality    | Genome-fragment | 3.82  | 0     |
| S12_extracted_k141_173141 | 1760  | No  | NA | 1   | 0 | Low-quality    | Genome-fragment | 5.1   | 0     |
| S12_vs_k141_155966 full   | 1760  | No  | NA | 0   | 0 | Low-quality    | Genome-fragment | 3.28  | 0     |
| S8_extracted_k141_185214  | 1760  | No  | NA | 0   | 1 | Low-quality    | Genome-fragment | 0.46  | 0     |
| S5_extracted_k141_779     | 1223  | No  | NA | 0   | 1 | Not-determined | Genome-fragment | NA    | 0     |
| S5_extracted_k141_18665   | 1449  | No  | NA | 0   | 1 | Not-determined | Genome-fragment | NA    | 0     |
| S5_extracted_k141_791     | 1002  | No  | NA | 0   | 1 | Not-determined | Genome-fragment | NA    | 0     |
| S5_extracted_k141_30912   | 1231  | No  | NA | 0   | 1 | Not-determined | Genome-fragment | NA    | 0     |
| S5_extracted_k141_36719   | 1828  | No  | NA | 0   | 1 | Not-determined | Genome-fragment | NA    | 0     |
| S5_extracted_k141_61232   | 1188  | No  | NA | 0   | 0 | Not-determined | Genome-fragment | NA    | 0     |
| S5_extracted_k141_18683   | 1080  | No  | NA | 0   | 0 | Not-determined | Genome-fragment | NA    | 0     |
| S5_extracted_k141_122216  | 1130  | No  | NA | 0   | 0 | Not-determined | Genome-fragment | NA    | 0     |
| S5_extracted_k141_115881  | 1571  | No  | NA | 0   | 0 | Not-determined | Genome-fragment | NA    | 0     |
| S5_extracted_k141_49063   | 3124  | No  | NA | 0   | 1 | Not-determined | Genome-fragment | NA    | 0     |
| S5_extracted_k141_112240  | 1279  | No  | NA | 0   | 1 | Not-determined | Genome-fragment | NA    | 0     |
| S9_vs_k141_72295 full     | 1761  | No  | NA | 0   | 0 | Low-quality    | Genome-fragment | 4.04  | 0     |
| S5_vs_k141_13599 full     | 1761  | No  | NA | 0   | 0 | Low-quality    | Genome-fragment | 3.46  | 0     |
| S5_extracted_k141_49080   | 1380  | No  | NA | 0   | 1 | Not-determined | Genome-fragment | NA    | 0     |
| S5_vs_k141_21288 full     | 1761  | No  | NA | 0   | 1 | Low-quality    | Genome-fragment | 1.46  | 0     |
| S7_extracted_103843       | 1761  | No  | NA | 1   | 0 | Low-quality    | Genome-fragment | 1.23  | 0     |
| S7_vs_21679 full          | 1761  | No  | NA | 0   | 0 | Low-quality    | Genome-fragment | 3.91  | 0     |
| S5_extracted_k141_122289  | 4899  | No  | NA | 0   | 1 | Not-determined | Genome-fragment | NA    | 0     |
| S7_vs_72921 full          | 1761  | No  | NA | 2   | 0 | Low-quality    | Genome-fragment | 2.81  | 0     |
| S2_vs_k141_1173 full      | 1761  | No  | NA | 0   | 1 | Low-quality    | Genome-fragment | 1.36  | 0     |
| S5_extracted_k141_855     | 1037  | No  | NA | 0   | 0 | Not-determined | Genome-fragment | NA    | 0     |
| S5_extracted_k141_85520   | 1083  | No  | NA | 0   | 2 | Not-determined | Genome-fragment | NA    | 0     |
| S17_vs_k141_28233 full    | 1762  | No  | NA | 0   | 0 | Low-quality    | Genome-fragment | 2.03  | 0     |
| S9_extracted_k141_58333   | 1762  | No  | NA | 0   | 0 | Low-quality    | Genome-fragment | 5.86  | 0     |
| S5_extracted_k141_85540   | 1876  | No  | NA | 0   | 1 | Not-determined | Genome-fragment | NA    | 0     |
| S11_vs_k141_28477 l 2gene | 1762  | No  | NA | 1   | 0 | Low-quality    | Genome-fragment | 4.35  | 0     |
| S5_extracted_k141_67094   | 2425  | No  | NA | 0   | 0 | Low-quality    | Genome-fragment | NA    | 0     |
| S14_vs_k141_35746 full    | 1762  | No  | NA | 0   | 0 | Low-quality    | Genome-fragment | 3.48  | 0     |
| S1_vs_k141_132753 full    | 1762  | No  | NA | 2   | 0 | Low-quality    | Genome-fragment | 4.45  | 0     |
| S5_extracted_k141_91615   | 3490  | No  | NA | 0   | 0 | Not-determined | Genome-fragment | NA    | 0     |
| S5_extracted_k141_91616   | 1203  | No  | NA | 0   | 2 | Not-determined | Genome-fragment | NA    | 0     |
| S1_vs_k141_39949 l 2gene  | 1762  | No  | NA | 2   | 0 | Low-quality    | Genome-fragment | 3.46  | 0     |
| S5_extracted_k141_128133  | 1171  | No  | NA | 0   | 1 | Not-determined | Genome-fragment | NA    | 0     |
| S5_extracted_k141_67186   | 3663  | No  | NA | 0   | 1 | Not-determined | Genome-fragment | NA    | 0     |
| S3_vs_k141_42670 full     | 1762  | No  | NA | 3   | 0 | Low-quality    | Genome-fragment | 2.77  | 0     |
| S10_vs_51 full            | 1762  | No  | NA | 0   | 0 | Low-quality    | Genome-fragment | 5.33  | 0     |
| S5_extracted_k141_122441  | 1175  | No  | NA | 2   | 1 | Not-determined | Genome-fragment | NA    | 0     |
| S5_extracted_k141_36940   | 1278  | No  | NA | 0   | 1 | Not-determined | Genome-fragment | NA    | 0     |
| S10_vs_28742 full         | 1762  | No  | NA | 1   | 0 | Low-quality    | Genome-fragment | 3.7   | 0     |
| S5_extracted_k141_122485  | 1203  | No  | NA | 2   | 1 | Not-determined | Genome-fragment | NA    | 0     |
| S5_extracted_k141_6769    | 1527  | No  | NA | 0   | 0 | Not-determined | Genome-fragment | NA    | 0     |
| S5_extracted_k141_122492  | 4152  | No  | NA | 0   | 1 | Not-determined | Genome-fragment | NA    | 0     |
| S12_vs_k141_40358 full    | 1762  | No  | NA | 0   | 1 | Low-quality    | Genome-fragment | 1.25  | 0     |
| S5_extracted_k141_31187   | 3730  | No  | NA | 0   | 0 | Not-determined | Genome-fragment | NA    | 0     |
| S5_extracted_k141_6794    | 10026 | No  | NA | 0   | 0 | Not-determined | Genome-fragment | NA    | 0     |
| S5_extracted_k141_6815    | 1473  | No  | NA | 0   | 0 | Not-determined | Genome-fragment | NA    | 0     |
| S5_extracted_k141_6836    | 2043  | No  | NA | 0   | 1 | Not-determined | Genome-fragment | NA    | 0     |
| S12_vs_k141_58116 full    | 1762  | No  | NA | 1   | 0 | Low-quality    | Genome-fragment | 3.47  | 0     |
| S17_vs_k141_160473 full   | 1763  | No  | NA | 0   | 1 | Low-quality    | Genome-fragment | 1.1   | 0     |
| S5_extracted_k141_37039   | 1373  | No  | NA | 0   | 1 | Not-determined | Genome-fragment | NA    | 0     |
| S5_extracted_k141_43540   | 1813  | No  | NA | 0   | 2 | Not-determined | Genome-fragment | NA    | 0     |
| S5_extracted_k141_43547   | 2570  | No  | NA | 0   | 1 | Not-determined | Genome-fragment | NA    | 0     |
| S1_extracted_k141_28219   | 1763  | No  | NA | 3   | 0 | Low-quality    | Genome-fragment | 4.69  | 0     |
| S5_extracted_k141_49387   | 1042  | No  | NA | 0   | 1 | Not-determined | Genome-fragment | NA    | 0     |
| S7_extracted_15512        | 1763  | No  | NA | 2   | 0 | Low-quality    | Genome-fragment | 10.59 | 0     |
| S5_extracted_k141_79237   | 3229  | No  | NA | 0   | 1 | Not-determined | Genome-fragment | NA    | 0     |
| S5_extracted_k141_122568  | 5264  | No  | NA | 21  | 1 | Complete       | High-quality    | 100   | 0     |
| S11_extracted             |       |     |    |     |   |                |                 |       |       |



|                            |       |     |    |     |    |                |                 |    |       |
|----------------------------|-------|-----|----|-----|----|----------------|-----------------|----|-------|
| 55_extracted_k141_73299    | 1071  | No  | NA | 0   | 1  | Not-determined | Genome-fragment | NA | 0     |
| 55_extracted_k141_122857   | 4133  | No  | NA | 2   | 0  | Not-determined | Genome-fragment | NA | 0     |
| 55_extracted_k141_122858   | 1335  | No  | NA | 0   | 0  | Not-determined | Genome-fragment | NA | 0     |
| 58_vs_k141_138809  full    | 1764  | No  | NA | 0   | 0  | Low-quality    | Genome-fragment | NA | 3.32  |
| 55_extracted_k141_67519    | 1409  | No  | NA | 0   | 1  | Not-determined | Genome-fragment | NA | 0     |
| 59_extracted_k141_81962    | 1765  | No  | NA | 2   | 0  | Low-quality    | Genome-fragment | NA | 3.81  |
| 511_vs_k141_47579  full    | 1765  | No  | NA | 1   | 0  | Low-quality    | Genome-fragment | NA | 5.29  |
| 511_vs_k141_49101  full    | 1765  | No  | NA | 0   | 0  | Low-quality    | Genome-fragment | NA | 3.96  |
| 514_extracted_k141_14257   | 1765  | No  | NA | 0   | 1  | Low-quality    | Genome-fragment | NA | 0.61  |
| 51_vs_k141_29746  full     | 1765  | No  | NA | 0   | 0  | Low-quality    | Genome-fragment | NA | 2.82  |
| 55_extracted_k141_122922   | 1375  | No  | NA | 0   | 0  | Not-determined | Genome-fragment | NA | 0     |
| 53_vs_k141_2392  full      | 1765  | No  | NA | 0   | 0  | Low-quality    | Genome-fragment | NA | 2.52  |
| 57_extracted_6047          | 1765  | No  | NA | 1   | 0  | Low-quality    | Genome-fragment | NA | 7.59  |
| 512_vs_k141_179844  full   | 1765  | No  | NA | 0   | 0  | Low-quality    | Genome-fragment | NA | 4.37  |
| 55_extracted_k141_31559    | 3726  | No  | NA | 0   | 4  | Not-determined | Genome-fragment | NA | 4.27  |
| 58_extracted_k141_33733    | 1765  | No  | NA | 0   | 0  | Low-quality    | Genome-fragment | NA | 4.27  |
| 58_vs_k141_182137  full    | 1765  | No  | NA | 1   | 0  | Low-quality    | Genome-fragment | NA | 4.31  |
| 517_vs_k141_358  full      | 1766  | No  | NA | 0   | 0  | Low-quality    | Genome-fragment | NA | 1.25  |
| 55_extracted_k141_95855    | 3712  | No  | NA | 0   | 0  | Not-determined | Genome-fragment | NA | 0     |
| 59_vs_k141_36286  full     | 1766  | No  | NA | 1   | 0  | Low-quality    | Genome-fragment | NA | 4.35  |
| 59_vs_k141_70678  full     | 1766  | No  | NA | 2   | 0  | Low-quality    | Genome-fragment | NA | 3.07  |
| 511_vs_k141_53762  full    | 1766  | No  | NA | 0   | 0  | Low-quality    | Genome-fragment | NA | 4.11  |
| 57_vs_93734  full          | 1766  | No  | NA | 1   | 0  | Low-quality    | Genome-fragment | NA | 4.92  |
| 57_vs_94174  full          | 1766  | No  | NA | 2   | 0  | Low-quality    | Genome-fragment | NA | 4.02  |
| 57_vs_114024  full         | 1766  | No  | NA | 0   | 0  | Low-quality    | Genome-fragment | NA | 3.2   |
| 55_extracted_k141_67622    | 16282 | No  | NA | 18  | 6  | High-quality   | High-quality    | NA | 91.68 |
| 516_vs_130588  full        | 1766  | No  | NA | 0   | 2  | Low-quality    | Genome-fragment | NA | 1.44  |
| 55_extracted_k141_110171   | 47834 | No  | NA | 11  | 0  | High-quality   | High-quality    | NA | 100   |
| 512_extracted_k141_176337  | 1766  | No  | NA | 2   | 0  | Low-quality    | Genome-fragment | NA | 3.77  |
| 55_extracted_k141_37460    | 1271  | No  | NA | 0   | 0  | Not-determined | Genome-fragment | NA | 0     |
| 52_extracted_k141_13995    | 1766  | No  | NA | 5   | 0  | Low-quality    | Genome-fragment | NA | 5.83  |
| 55_extracted_k141_67685    | 2259  | No  | NA | 0   | 1  | Not-determined | Genome-fragment | NA | 0     |
| 55_extracted_k141_7313     | 1155  | No  | NA | 0   | 0  | Not-determined | Genome-fragment | NA | 0     |
| 55_extracted_k141_37488    | 8022  | No  | NA | 0   | 5  | Not-determined | Genome-fragment | NA | 0     |
| 55_extracted_k141_37883    | 1336  | No  | NA | 0   | 0  | Not-determined | Genome-fragment | NA | 0     |
| 511_vs_k141_84433  full    | 1767  | No  | NA | 0   | 0  | Low-quality    | Genome-fragment | NA | 2.06  |
| 55_extracted_k141_128315   | 2428  | No  | NA | 0   | 0  | Not-determined | Genome-fragment | NA | 0     |
| 53_vs_k141_62016  H2genome | 1767  | No  | NA | 2   | 0  | Low-quality    | Genome-fragment | NA | 3.93  |
| 55_vs_k141_50610  full     | 1767  | No  | NA | 0   | 0  | Low-quality    | Genome-fragment | NA | 3.11  |
| 510_extracted_102941       | 1767  | No  | NA | 0   | 0  | Low-quality    | Genome-fragment | NA | 2.3   |
| 55_extracted_k141_92502    | 1768  | No  | NA | 2   | 0  | Low-quality    | Genome-fragment | NA | 4.42  |
| 55_extracted_k141_51710    | 5673  | No  | NA | 0   | 0  | Not-determined | Genome-fragment | NA | 0     |
| 516_vs_82546  full         | 1768  | No  | NA | 2   | 0  | Low-quality    | Genome-fragment | NA | 3.25  |
| 55_extracted_k141_13162    | 1149  | No  | NA | 0   | 0  | Not-determined | Genome-fragment | NA | 0     |
| 515_extracted_3377         | 1768  | No  | NA | 1   | 0  | Low-quality    | Genome-fragment | NA | 0.95  |
| 55_extracted_k141_79466    | 2442  | No  | NA | 0   | 1  | Not-determined | Genome-fragment | NA | 0     |
| 55_extracted_k141_73617    | 1160  | No  | NA | 0   | 1  | Not-determined | Genome-fragment | NA | 0     |
| 55_extracted_k141_123252   | 1041  | No  | NA | 0   | 0  | Not-determined | Genome-fragment | NA | 0     |
| 58_extracted_k141_108898   | 1768  | No  | NA | 0   | 0  | Low-quality    | Genome-fragment | NA | 5.7   |
| 58_extracted_k141_126939   | 1768  | No  | NA | 0   | 0  | Low-quality    | Genome-fragment | NA | 1.86  |
| 55_extracted_k141_92193    | 4438  | No  | NA | 0   | 0  | Not-determined | Genome-fragment | NA | 0     |
| 55_extracted_k141_67871    | 2823  | No  | NA | 0   | 0  | Not-determined | Genome-fragment | NA | 0     |
| 55_extracted_k141_116938   | 1786  | No  | NA | 0   | 1  | Not-determined | Genome-fragment | NA | 0     |
| 58_vs_k141_50223  full     | 1768  | No  | NA | 0   | 0  | Low-quality    | Genome-fragment | NA | 2.44  |
| 55_extracted_k141_116965   | 4508  | No  | NA | 0   | 1  | Not-determined | Genome-fragment | NA | 0     |
| 517_extracted_k141_99310   | 1769  | No  | NA | 4   | 0  | Low-quality    | Genome-fragment | NA | 5.84  |
| 514_vs_k141_75742  full    | 1769  | No  | NA | 3   | 0  | Low-quality    | Genome-fragment | NA | 3.89  |
| 55_extracted_k141_140588   | 1154  | No  | NA | 0   | 0  | Not-determined | Genome-fragment | NA | 0     |
| 55_extracted_k141_49716    | 1748  | No  | NA | 0   | 0  | Not-determined | Genome-fragment | NA | 0     |
| 55_vs_k141_67617  full     | 1769  | No  | NA | 0   | 0  | Low-quality    | Genome-fragment | NA | 4.92  |
| 55_extracted_k141_73804    | 1506  | No  | NA | 0   | 0  | Not-determined | Genome-fragment | NA | 2.14  |
| 55_vs_k141_23587  full     | 1769  | No  | NA | 0   | 0  | Low-quality    | Genome-fragment | NA | 0     |
| 55_extracted_k141_128479   | 1160  | No  | NA | 0   | 1  | Not-determined | Genome-fragment | NA | 0     |
| 516_vs_100971  full        | 1769  | No  | NA | 2   | 0  | Low-quality    | Genome-fragment | NA | 3.63  |
| 512_extracted_k141_33895   | 1769  | No  | NA | 0   | 0  | Low-quality    | Genome-fragment | NA | 2.48  |
| 55_extracted_k141_104469   | 1138  | No  | NA | 0   | 0  | Not-determined | Genome-fragment | NA | 0     |
| 55_extracted_k141_67978    | 1108  | No  | NA | 0   | 0  | Not-determined | Genome-fragment | NA | 0     |
| 55_extracted_k141_37711    | 2843  | No  | NA | 0   | 2  | Not-determined | Genome-fragment | NA | 0     |
| 512_vs_k141_93173  full    | 1769  | No  | NA | 0   | 0  | Low-quality    | Genome-fragment | NA | 5.13  |
| 55_extracted_k141_110608   | 1000  | No  | NA | 0   | 0  | Not-determined | Genome-fragment | NA | 0     |
| 55_extracted_k141_32046    | 4362  | No  | NA | 0   | 1  | Not-determined | Genome-fragment | NA | 0     |
| 55_extracted_k141_50498    | 2152  | No  | NA | 0   | 1  | Not-determined | Genome-fragment | NA | 0     |
| 55_extracted_k141_55415    | 98442 | No  | NA | 18  | 0  | High-quality   | High-quality    | NA | 97.88 |
| 58_vs_k141_144577  full    | 1769  | No  | NA | 1   | 0  | Low-quality    | Genome-fragment | NA | 3.78  |
| 511_extracted_k141_137315  | 1770  | No  | NA | 0   | 0  | Low-quality    | Genome-fragment | NA | 4.33  |
| 55_extracted_k141_104518   | 3832  | No  | NA | 0   | 0  | Not-determined | Genome-fragment | NA | 0     |
| 514_vs_k141_495241  full   | 1770  | Yes | NA | 990 | 1  | Low-quality    | Genome-fragment | NA | 1.12  |
| 55_extracted_k141_68035    | 3099  | No  | NA | 0   | 0  | Not-determined | Genome-fragment | NA | 44.07 |
| 55_extracted_k141_31099    | 3188  | No  | NA | 0   | 0  | Not-determined | Genome-fragment | NA | 0     |
| 57_vs_31309  full          | 1770  | No  | NA | 1   | 0  | Low-quality    | Genome-fragment | NA | 3.13  |
| 55_extracted_k141_140718   | 7808  | No  | NA | 0   | 2  | Not-determined | Genome-fragment | NA | 0     |
| 55_extracted_k141_128533   | 1625  | No  | NA | 0   | 0  | Not-determined | Genome-fragment | NA | 0     |
| 55_extracted_k141_110667   | 1403  | No  | NA | 0   | 2  | Not-determined | Genome-fragment | NA | 0     |
| 51_vs_k141_4047  full      | 1771  | No  | NA | 0   | 2  | Low-quality    | Genome-fragment | NA | 2.6   |
| 515_extracted_47391        | 1772  | No  | NA | 0   | 0  | Low-quality    | Genome-fragment | NA | 2.2   |
| 55_extracted_k141_61932    | 18822 | No  | NA | 0   | 9  | Not-determined | Genome-fragment | NA | 0     |
| 55_extracted_k141_32170    | 1054  | No  | NA | 0   | 1  | Not-determined | Genome-fragment | NA | 0     |
| 55_extracted_k141_7552     | 3886  | No  | NA | 0   | 0  | Not-determined | Genome-fragment | NA | 0     |
| 58_extracted_k141_90033    | 1771  | No  | NA | 0   | 0  | Low-quality    | Genome-fragment | NA | 1.91  |
| 59_extracted_k141_82147    | 1772  | No  | NA | 0   | 1  | Low-quality    | Genome-fragment | NA | 0.87  |
| 51_vs_k141_57065  full     | 1772  | No  | NA | 0   | 2  | Low-quality    | Genome-fragment | NA | 3.37  |
| 55_extracted_k141_73891    | 5519  | No  | NA | 0   | 4  | Not-determined | Genome-fragment | NA | 0     |
| 55_extracted_k141_110793   | 1012  | No  | NA | 0   | 0  | Not-determined | Genome-fragment | NA | 0     |
| 53_vs_k141_120681  full    | 1772  | No  | NA | 2   | 0  | Low-quality    | Genome-fragment | NA | 4.99  |
| 55_extracted_k141_68174    | 3127  | No  | NA | 0   | 0  | Not-determined | Genome-fragment | NA | 0     |
| 55_extracted_k141_110791   | 1014  | No  | NA | 0   | 0  | Not-determined | Genome-fragment | NA | 0     |
| 55_extracted_k141_110793   | 3366  | No  | NA | 0   | 2  | Not-determined | Genome-fragment | NA | 0     |
| 55_extracted_k141_128693   | 2471  | No  | NA | 0   | 0  | Not-determined | Genome-fragment | NA | 0     |
| 55_extracted_k141_24958    | 8534  | No  | NA | 0   | 2  | Not-determined | Genome-fragment | NA | 0     |
| 55_extracted_k141_79581    | 1203  | No  | NA | 0   | 1  | Not-determined | Genome-fragment | NA | 0     |
| 55_extracted_k141_86344    | 1034  | No  | NA | 0   | 1  | Not-determined | Genome-fragment | NA | 0     |
| 55_extracted_k141_79602    | 1203  | No  | NA | 0   | 1  | Not-determined | Genome-fragment | NA | 0     |
| 55_extracted_k141_104747   | 1519  | No  | NA | 0   | 1  | Not-determined | Genome-fragment | NA | 0     |
| 55_extracted_k141_62010    | 1698  | No  | NA | 0   | 0  | Not-determined | Genome-fragment | NA | 0     |
| 55_extracted_k141_13500    | 1040  | No  | NA | 0   | 0  | Not-determined | Genome-fragment | NA | 0     |
| 56_vs_k141_55476  H2genome | 1772  | No  | NA | 1   | 0  | Low-quality    | Genome-fragment | NA | 2.32  |
| 55_extracted_k141_37921    | 5938  | No  | NA | 0   | 4  | Not-determined | Genome-fragment | NA | 0     |
| 510_extracted_9668         | 1773  | No  | NA | 0   | 0  | Low-quality    | Genome-fragment | NA | 4.04  |
| 55_extracted_k141_86433    | 1807  | No  | NA | 0   | 0  | Not-determined | Genome-fragment | NA | 0     |
| 510_extracted_79062        | 1773  | No  | NA | 2   | 0  | Low-quality    | Genome-fragment | NA | 1.26  |
| 512_vs_k141_98145  full    | 1773  | No  | NA | 2   | 0  | Low-quality    | Genome-fragment | NA | 3.97  |
| 515_extracted_16245        | 1773  | No  | NA | 0   | 0  | Low-quality    | Genome-fragment | NA | 2.14  |
| 59_vs_k141_33445  H2genome | 1774  | No  | NA | 0   | 1  | Low-quality    | Genome-fragment | NA | 1.36  |
| 55_extracted_k141_38011    | 16427 | No  | NA | 6   | 0  | Medium-quality | Genome-fragment | NA | 68.39 |
| 51_vs_k141_100050  full    | 1774  | No  | NA | 0   | 0  | Low-quality    | Genome-fragment | NA | 3.32  |
| 55_extracted_k141_19721    | 6983  | No  | NA | 0   | 7  | Not-determined | Genome-fragment | NA | 0     |
| 57_extracted_135777        | 1774  | No  | NA | 3   | 0  | Low-quality    | Genome-fragment | NA | 3.1   |
| 55_extracted_k141_20292    | 3851  | No  | NA | 0   | 1  | Not-determined | Genome-fragment | NA | 0     |
| 58_vs_k141_118551  full    | 1774  | No  | NA | 0   | 0  | Low-quality    | Genome-fragment | NA | 3.57  |
| 55_extracted_k141_50170    | 1368  | No  | NA | 0   | 1  | Not-determined | Genome-fragment | NA | 0     |
| 55_extracted_k141_7729     | 8903  | No  | NA | 0   | 2  | Not-determined | Genome-fragment | NA | 0     |
| 517_vs_k141_475871  full   | 1775  | No  | NA | 0   | 0  | Low-quality    | Genome-fragment | NA | 1.22  |
| 55_extracted_k141_44437    | 1132  | No  | NA | 0   | 1  | Not-determined | Genome-fragment | NA | 0     |
| 511_vs_k141_43956  full    | 1775  | No  | NA | 0   | 0  | Low-quality    | Genome-fragment | NA | 4.01  |
| 55_extracted_k141_110899   | 1586  | No  | NA | 0   | 0  | Not-determined | Genome-fragment | NA | 0     |
| 51_vs_k141_125962  full    | 1775  | No  | NA | 2   | 0  | Low-quality    | Genome-fragment | NA | 4.62  |
| 55_extracted_k141_25147    | 3133  | No  | NA | 0   | 0  | Not-determined | Genome-fragment | NA | 0     |
| 512_vs_k141_75895  full    | 1775  | No  | NA | 0   | 0  | Low-quality    | Genome-fragment | NA | 4.97  |
| 56_vs_k141_159771  full    | 1775  | No  | NA | 2   | 0  | Low-quality    | Genome-fragment | NA | 3.88  |
| 55_extracted_k141_79671    | 2696  | No  | NA | 0   | 0  | Not-determined | Genome-fragment | NA | 0     |
| 55_extracted_k141_32475    | 1515  | No  | NA | 0   | 0  | Not-determined | Genome-fragment | NA | 0     |
| 55_extracted_k141_55687    | 14413 | No  | NA | 12  | 0  | Medium-quality | Genome-fragment | NA | 65.79 |
| 55_extracted_k141_317489   | 1014  | No  | NA | 0   | 0  | Not-determined | Genome-fragment | NA | 0     |
| 55_extracted_k141_44480    | 15595 | No  | NA | 0   | 10 | Not-determined | Genome-fragment | NA | 0     |
| 513_vs_16901  full         | 1776  | No  | NA | 0   | 0  | Low-quality    | Genome-fragment | NA | 4.04  |
| 55_extracted_k141_134818   | 2205  | No  | NA | 0   | 1  | Not-determined | Genome-fragment | NA | 0     |
| 55_extracted_k141_2025     | 1115  | No  | NA | 0   | 1  | Not-determined | Genome-fragment | NA | 0     |
| 55_extracted_k141_68319    | 3642  | No  | NA | 0   | 0  | Not-determined | Genome-fragment | NA | 0     |
| 55_extracted_k141_44496    | 1009  | No  | NA | 0   | 0  | Not-determined | Genome-fragment | NA | 0     |
| 55_extracted_k141_111048   | 1131  | No  | NA | 0   | 0  | Not-determined | Genome-fragment | NA | 0     |
| 514_vs_k141_68255  full    | 1776  | No  | NA | 0   | 0  | Low-quality    | Genome-fragment | NA | 2.4   |
| 53_vs_k141_65557  full     | 1776  | No  | NA | 0   | 0  | Low-quality    | Genome-fragment | NA | 3.98  |
| 55_extracted_k141_139461   | 1776  | No  | NA | 0   | 0  | Low-quality    | Genome-fragment | NA | 4.4   |



|                           |       |     |    |    |   |                |                 |    |       |       |
|---------------------------|-------|-----|----|----|---|----------------|-----------------|----|-------|-------|
| 55_extracted_k141_50600   | 1028  | No  | NA | 0  | 1 | Not-determined | Genome-fragment | NA | 5.84  | 0     |
| 514_extracted_k141_2572   | 1777  | No  | NA | 1  | 0 | Low-quality    | Genome-fragment | NA | 4.49  | 0     |
| 55_extracted_k141_20014   | 1283  | No  | NA | 0  | 1 | Not-determined | Genome-fragment | NA | 4.58  | 0     |
| 53_vs_k141_71128          | 1777  | No  | NA | 0  | 0 | Low-quality    | Genome-fragment | NA | 4.49  | 0     |
| 57_vs_81829               | 1777  | No  | NA | 0  | 0 | Low-quality    | Genome-fragment | NA | 4.49  | 0     |
| 55_extracted_k141_20057   | 1456  | No  | NA | 0  | 1 | Not-determined | Genome-fragment | NA | 4.49  | 0     |
| 55_extracted_k141_2490    | 1017  | No  | NA | 0  | 0 | Not-determined | Genome-fragment | NA | 4.49  | 0     |
| 55_extracted_k141_93158   | 4610  | No  | NA | 0  | 0 | Not-determined | Genome-fragment | NA | 4.49  | 0     |
| 55_extracted_k141_31700   | 6145  | No  | NA | 0  | 1 | Not-determined | Genome-fragment | NA | 4.49  | 0     |
| 512_extracted_k141_113076 | 1777  | No  | NA | 0  | 0 | Low-quality    | Genome-fragment | NA | 3.69  | 0     |
| 56_extracted_k141_4733    | 1777  | No  | NA | 1  | 0 | Low-quality    | Genome-fragment | NA | 5.73  | 0     |
| 517_extracted_k141_13380  | 1778  | No  | NA | 0  | 2 | Low-quality    | Genome-fragment | NA | 2.62  | 0     |
| 59_vs_k141_34648          | 1778  | No  | NA | 0  | 0 | Low-quality    | Genome-fragment | NA | 4.12  | 0     |
| 55_extracted_k141_44773   | 1311  | No  | NA | 0  | 2 | Not-determined | Genome-fragment | NA | 4.12  | 0     |
| 55_extracted_k141_93189   | 1173  | No  | NA | 0  | 2 | Not-determined | Genome-fragment | NA | 4.12  | 0     |
| 55_extracted_k141_141159  | 1109  | No  | NA | 0  | 0 | Not-determined | Genome-fragment | NA | 4.12  | 0     |
| 511_vs_k141_44187         | 1778  | No  | NA | 1  | 0 | Low-quality    | Genome-fragment | NA | 4.69  | 0     |
| 53_vs_k141_7769           | 1778  | No  | NA | 1  | 0 | Low-quality    | Genome-fragment | NA | 3.07  | 0     |
| 55_extracted_k141_14195   | 4658  | No  | NA | 0  | 1 | Not-determined | Genome-fragment | NA | 4.14  | 0     |
| 57_vs_92557               | 1778  | No  | NA | 1  | 0 | Low-quality    | Genome-fragment | NA | 4.14  | 0     |
| 55_extracted_k141_93189   | 1133  | No  | NA | 0  | 0 | Not-determined | Genome-fragment | NA | 4.14  | 0     |
| 55_extracted_k141_105478  | 1616  | No  | NA | 0  | 2 | Not-determined | Genome-fragment | NA | 4.14  | 0     |
| 516_extracted_146968      | 1778  | No  | NA | 0  | 1 | Low-quality    | Genome-fragment | NA | 2.86  | 0     |
| 55_extracted_k141_141252  | 1009  | No  | NA | 0  | 0 | Not-determined | Genome-fragment | NA | 2.86  | 0     |
| 55_extracted_k141_93213   | 1162  | No  | NA | 0  | 3 | Not-determined | Genome-fragment | NA | 0.48  | 0     |
| 510_extracted_79115       | 1778  | No  | NA | 0  | 1 | Low-quality    | Genome-fragment | NA | 0.48  | 0     |
| 55_extracted_k141_25423   | 29056 | No  | NA | 45 | 0 | High-quality   | Genome-fragment | NA | 95.81 | 0     |
| 510_extracted_120611      | 1778  | No  | NA | 0  | 0 | Low-quality    | Genome-fragment | NA | 1.6   | 0     |
| 510_vs_k143               | 1778  | No  | NA | 0  | 0 | Low-quality    | Genome-fragment | NA | 1.6   | 0     |
| 55_extracted_k141_86917   | 1398  | No  | NA | 0  | 0 | Not-determined | Genome-fragment | NA | 75.2  | 0     |
| 55_extracted_k141_123990  | 17185 | No  | NA | 9  | 0 | Medium-quality | Genome-fragment | NA | 4.31  | 0     |
| 55_extracted_k141_68631   | 1046  | No  | NA | 0  | 1 | Not-determined | Genome-fragment | NA | 1.02  | 0     |
| 58_vs_k141_11741          | 1778  | No  | NA | 0  | 0 | Low-quality    | Genome-fragment | NA | 2.66  | 0     |
| 58_vs_k141_46469          | 1778  | No  | NA | 0  | 3 | Low-quality    | Genome-fragment | NA | 3.91  | 0     |
| 511_vs_k141_17857         | 1779  | No  | NA | 0  | 1 | Low-quality    | Genome-fragment | NA | 3.53  | 0     |
| 55_extracted_k141_68637   | 4845  | No  | NA | 0  | 0 | Not-determined | Genome-fragment | NA | 1.62  | 0     |
| 55_extracted_k141_50798   | 1705  | No  | NA | 0  | 1 | Not-determined | Genome-fragment | NA | 3.71  | 0     |
| 53_vs_k141_12560          | 1779  | No  | NA | 1  | 0 | Low-quality    | Genome-fragment | NA | 1.62  | 0     |
| 55_vs_k141_57989          | 1779  | No  | NA | 0  | 2 | Low-quality    | Genome-fragment | NA | 1.62  | 0     |
| 55_extracted_k141_20225   | 1444  | No  | NA | 0  | 2 | Not-determined | Genome-fragment | NA | 1.62  | 0     |
| 55_extracted_k141_62493   | 7225  | No  | NA | 0  | 0 | Not-determined | Genome-fragment | NA | 1.62  | 0     |
| 55_extracted_k141_129448  | 2707  | No  | NA | 0  | 0 | Not-determined | Genome-fragment | NA | 1.62  | 0     |
| 57_extracted_60031        | 1779  | No  | NA | 0  | 1 | Low-quality    | Genome-fragment | NA | 1.62  | 0     |
| 512_vs_k141_66192         | 1779  | No  | NA | 0  | 0 | Low-quality    | Genome-fragment | NA | 3.71  | 0     |
| 55_extracted_k141_93518   | 1169  | No  | NA | 0  | 0 | Not-determined | Genome-fragment | NA | 79.55 | 0     |
| 510_extracted_k141_105728 | 36024 | No  | NA | 16 | 0 | Medium-quality | Genome-fragment | NA | 1.32  | 0     |
| 56_vs_k141_54414          | 1779  | No  | NA | 0  | 2 | Low-quality    | Genome-fragment | NA | 1.2   | 0     |
| 58_vs_k141_11601          | 1779  | No  | NA | 1  | 0 | Low-quality    | Genome-fragment | NA | 1.2   | 0     |
| 55_extracted_k141_124313  | 3426  | No  | NA | 0  | 1 | Not-determined | Genome-fragment | NA | 0.35  | 0     |
| 55_extracted_k141_44857   | 1376  | No  | NA | 0  | 1 | Not-determined | Genome-fragment | NA | 0.35  | 0     |
| 55_extracted_k141_124718  | 3120  | No  | NA | 0  | 1 | Not-determined | Genome-fragment | NA | 0.35  | 0     |
| 55_extracted_k141_14416   | 12045 | No  | NA | 0  | 2 | Low-quality    | Genome-fragment | NA | 0.35  | 0     |
| 53_vs_k141_91759          | 1780  | No  | NA | 0  | 2 | Low-quality    | Genome-fragment | NA | 0.35  | 0     |
| 57_extracted_18847        | 1780  | No  | NA | 1  | 0 | Low-quality    | Genome-fragment | NA | 0.35  | 0     |
| 57_vs_94199               | 1780  | No  | NA | 1  | 0 | Low-quality    | Genome-fragment | NA | 4.01  | 0     |
| 512_vs_k141_51776         | 1780  | Yes | NA | 1  | 1 | Low-quality    | Genome-fragment | NA | 2.53  | 53.48 |
| 55_extracted_k141_98430   | 1186  | No  | NA | 0  | 0 | Not-determined | Genome-fragment | NA | 0     | 0     |
| 55_extracted_k141_38453   | 1012  | No  | NA | 0  | 0 | Not-determined | Genome-fragment | NA | 0     | 0     |
| 55_extracted_k141_105862  | 2761  | No  | NA | 0  | 0 | Not-determined | Genome-fragment | NA | 0     | 0     |
| 55_extracted_k141_68789   | 1394  | No  | NA | 0  | 2 | Not-determined | Genome-fragment | NA | 0     | 0     |
| 55_extracted_k141_53075   | 1035  | No  | NA | 0  | 0 | Not-determined | Genome-fragment | NA | 0     | 0     |
| 55_extracted_k141_2871    | 1686  | No  | NA | 0  | 2 | Not-determined | Genome-fragment | NA | 1.85  | 0     |
| 52_extracted_k141_13376   | 1780  | No  | NA | 0  | 0 | Low-quality    | Genome-fragment | NA | 1.85  | 0     |
| 55_extracted_k141_20393   | 1130  | No  | NA | 0  | 1 | Not-determined | Genome-fragment | NA | 5     | 0     |
| 52_vs_k141_6297           | 1780  | No  | NA | 0  | 0 | Low-quality    | Genome-fragment | NA | 2.05  | 0     |
| 517_vs_k141_52799         | 1781  | No  | NA | 0  | 0 | Low-quality    | Genome-fragment | NA | 3.71  | 0     |
| 55_extracted_k141_124254  | 1318  | No  | NA | 0  | 1 | Not-determined | Genome-fragment | NA | 4.01  | 0     |
| 55_extracted_k141_68846   | 2573  | No  | NA | 0  | 2 | Not-determined | Genome-fragment | NA | 3.71  | 0     |
| 59_vs_k141_79382          | 1781  | No  | NA | 0  | 0 | Low-quality    | Genome-fragment | NA | 4.01  | 0     |
| 55_extracted_k141_141459  | 3520  | No  | NA | 0  | 2 | Not-determined | Genome-fragment | NA | 4.01  | 0     |
| 513_vs_30826              | 1781  | No  | NA | 1  | 0 | Low-quality    | Genome-fragment | NA | 2.02  | 0     |
| 514_vs_k141_571971        | 1781  | No  | NA | 0  | 0 | Low-quality    | Genome-fragment | NA | 3.94  | 0     |
| 55_extracted_k141_124299  | 1013  | No  | NA | 0  | 0 | Not-determined | Genome-fragment | NA | 1.91  | 0     |
| 57_vs_93545               | 1781  | No  | NA | 1  | 0 | Low-quality    | Genome-fragment | NA | 3.23  | 0     |
| 512_vs_k141_51129         | 1091  | No  | NA | 0  | 0 | Not-determined | Genome-fragment | NA | 3.23  | 0     |
| 517_extracted_k141_156128 | 1782  | No  | NA | 1  | 0 | Low-quality    | Genome-fragment | NA | 4.57  | 0     |
| 55_extracted_k141_14500   | 1846  | No  | NA | 0  | 0 | Not-determined | Genome-fragment | NA | 1.61  | 0     |
| 55_extracted_k141_80146   | 1533  | No  | NA | 0  | 1 | Not-determined | Genome-fragment | NA | 6.49  | 0     |
| 59_extracted_k141_36644   | 1782  | No  | NA | 0  | 1 | Low-quality    | Genome-fragment | NA | 4.57  | 0     |
| 55_extracted_k141_3013    | 2877  | No  | NA | 0  | 5 | Not-determined | Genome-fragment | NA | 1.61  | 0     |
| 55_extracted_k141_93615   | 1452  | No  | NA | 0  | 0 | Not-determined | Genome-fragment | NA | 4.57  | 0     |
| 59_vs_k141_62968          | 1782  | No  | NA | 0  | 1 | Low-quality    | Genome-fragment | NA | 1.61  | 0     |
| 511_vs_k141_16223         | 1782  | No  | NA | 0  | 0 | Low-quality    | Genome-fragment | NA | 6.49  | 0     |
| 55_extracted_k141_38547   | 1957  | No  | NA | 0  | 1 | Not-determined | Genome-fragment | NA | 4.57  | 0     |
| 514_extracted_k141_60627  | 1782  | No  | NA | 2  | 0 | Not-determined | Genome-fragment | NA | 4.57  | 0     |
| 55_extracted_k141_129765  | 4796  | No  | NA | 0  | 0 | Not-determined | Genome-fragment | NA | 4.57  | 0     |
| 55_extracted_k141_135275  | 3094  | No  | NA | 0  | 2 | Not-determined | Genome-fragment | NA | 4.57  | 0     |
| 514_vs_k141_26782         | 1782  | No  | NA | 2  | 0 | Low-quality    | Genome-fragment | NA | 4.57  | 0     |
| 55_extracted_k141_8771    | 1362  | No  | NA | 25 | 0 | Not-determined | Genome-fragment | NA | 4.57  | 0     |
| 55_extracted_k141_106020  | 3452  | No  | NA | 0  | 3 | Not-determined | Genome-fragment | NA | 2.83  | 0     |
| 55_extracted_k141_118360  | 1757  | No  | NA | 0  | 1 | Not-determined | Genome-fragment | NA | 1.36  | 0     |
| 514_vs_k141_116093        | 1782  | No  | NA | 0  | 0 | Low-quality    | Genome-fragment | NA | 2.92  | 0     |
| 57_extracted_43909        | 1782  | No  | NA | 0  | 0 | Low-quality    | Genome-fragment | NA | 2.92  | 0     |
| 55_extracted_k141_124470  | 2458  | No  | NA | 0  | 0 | Not-determined | Genome-fragment | NA | 2.92  | 0     |
| 55_extracted_k141_62782   | 3653  | No  | NA | 0  | 2 | Not-determined | Genome-fragment | NA | 2.92  | 0     |
| 55_extracted_k141_62783   | 1303  | No  | NA | 0  | 0 | Not-determined | Genome-fragment | NA | 2.92  | 0     |
| 57_vs_32413               | 1782  | No  | NA | 1  | 0 | Low-quality    | Genome-fragment | NA | 2.04  | 0     |
| 55_extracted_k141_38006   | 1603  | No  | NA | 0  | 1 | Not-determined | Genome-fragment | NA | 3.28  | 0     |
| 55_extracted_k141_124490  | 6849  | No  | NA | 0  | 2 | Not-determined | Genome-fragment | NA | 4.26  | 0     |
| 57_vs_75771               | 1782  | No  | NA | 1  | 0 | Low-quality    | Genome-fragment | NA | 1.67  | 0     |
| 516_vs_132570             | 1782  | No  | NA | 0  | 0 | Low-quality    | Genome-fragment | NA | 5.85  | 0     |
| 515_vs_61269              | 1782  | No  | NA | 0  | 0 | Low-quality    | Genome-fragment | NA | 5.85  | 0     |
| 55_extracted_k141_62813   | 1470  | No  | NA | 0  | 0 | Not-determined | Genome-fragment | NA | 5.85  | 0     |
| 55_extracted_k141_31398   | 1115  | No  | NA | 0  | 1 | Not-determined | Genome-fragment | NA | 5.85  | 0     |
| 55_extracted_k141_51129   | 4978  | No  | NA | 0  | 1 | Not-determined | Genome-fragment | NA | 5.85  | 0     |
| 54_extracted_3612         | 1782  | No  | NA | 5  | 0 | Low-quality    | Genome-fragment | NA | 5.85  | 0     |
| 55_extracted_k141_68990   | 1254  | No  | NA | 0  | 1 | Not-determined | Genome-fragment | NA | 5.85  | 0     |
| 55_extracted_k141_106133  | 2726  | No  | NA | 0  | 2 | Not-determined | Genome-fragment | NA | 5.85  | 0     |
| 55_extracted_k141_51304   | 2856  | No  | NA | 0  | 0 | Not-determined | Genome-fragment | NA | 5.85  | 0     |
| 511_vs_k141_54108         | 1783  | No  | NA | 1  | 0 | Low-quality    | Genome-fragment | NA | 3.26  | 0     |
| 511_vs_k141_29364         | 1783  | No  | NA | 1  | 0 | Low-quality    | Genome-fragment | NA | 3.58  | 0     |
| 53_extracted_k141_106107  | 1783  | No  | NA | 0  | 0 | Low-quality    | Genome-fragment | NA | 3.58  | 0     |
| 55_extracted_k141_74412   | 1781  | No  | NA | 0  | 0 | Not-determined | Genome-fragment | NA | 2.92  | 0     |
| 55_extracted_k141_98551   | 1004  | No  | NA | 0  | 0 | Not-determined | Genome-fragment | NA | 2.92  | 0     |
| 52_vs_k141_93394          | 1783  | No  | NA | 0  | 1 | Low-quality    | Genome-fragment | NA | 2.92  | 0     |
| 55_extracted_k141_69020   | 1011  | No  | NA | 0  | 1 | Not-determined | Genome-fragment | NA | 2.92  | 0     |
| 55_extracted_k141_124557  | 1777  | No  | NA | 0  | 0 | Not-determined | Genome-fragment | NA | 2.92  | 0     |
| 55_extracted_k141_98563   | 1509  | No  | NA | 0  | 0 | Not-determined | Genome-fragment | NA | 2.92  | 0     |
| 512_vs_k141_128307        | 1783  | No  | NA | 0  | 0 | Low-quality    | Genome-fragment | NA | 1.4   | 0     |
| 55_extracted_k141_20642   | 2570  | No  | NA | 0  | 2 | Not-determined | Genome-fragment | NA | 4.95  | 0     |
| 512_vs_k141_34510         | 1783  | No  | NA | 0  | 0 | Low-quality    | Genome-fragment | NA | 2.71  | 0     |
| 58_vs_k141_85659          | 1783  | No  | NA | 0  | 0 | Low-quality    | Genome-fragment | NA | 4.23  | 0     |
| 51_vs_k141_109411         | 1784  | No  | NA | 0  | 0 | Low-quality    | Genome-fragment | NA | 66.73 | 0     |
| 55_extracted_k141_88008   | 22785 | No  | NA | 15 | 0 | Medium-quality | Genome-fragment | NA | 4.85  | 0     |
| 55_vs_k141_106260         | 1784  | No  | NA | 0  | 1 | Low-quality    | Genome-fragment | NA | 2.98  | 0     |
| 55_vs_k141_75370          | 1784  | No  | NA | 0  | 0 | Low-quality    | Genome-fragment | NA | 4.28  | 0     |
| 55_extracted_k141_14840   | 1066  | No  | NA | 0  | 0 | Not-determined | Genome-fragment | NA | 1.65  | 0     |
| 516_vs_126244             | 1784  | No  | NA | 0  | 0 | Low-quality    | Genome-fragment | NA | 1.65  | 0     |
| 55_extracted_k141_38759   | 1675  | No  | NA | 0  | 2 | Not-determined | Genome-fragment | NA | 1.65  | 0     |
| 55_extracted_k141_98631   | 1027  | No  | NA | 0  | 0 | Not-determined | Genome-fragment | NA | 1.65  | 0     |
| 516_vs_134570             | 1784  | No  | NA | 1  | 0 | Low-quality    | Genome-fragment | NA | 1.65  | 0     |
| 55_extracted_k141_38790   | 3059  | No  | NA | 0  | 1 | Not-determined | Genome-fragment | NA | 1.65  | 0     |
| 55_extracted_k141_93850   | 3345  | No  | NA | 0  | 2 | Not-determined | Genome-fragment | NA | 0.97  |       |



|                            |       |    |    |    |    |                |                 |     |      |   |
|----------------------------|-------|----|----|----|----|----------------|-----------------|-----|------|---|
| SS_extracted_k141_106472   | 1307  | No | NA | 0  | 0  | Not-determined | Genome-fragment | NA  | 3.11 | 0 |
| 58_vs_k141_193067  full    | 1787  | No | NA | 0  | 1  | Low-quality    | Genome-fragment | NA  | 3.51 | 0 |
| 514_vs_k141_101388  full   | 1788  | No | NA | 4  | 0  | Low-quality    | Genome-fragment | NA  | 3.51 | 0 |
| SS_extracted_k141_69506    | 1017  | No | NA | 0  | 1  | Not-determined | Genome-fragment | NA  | 1.47 | 0 |
| 51_extracted_k141_803      | 1788  | No | NA | 0  | 0  | Low-quality    | Genome-fragment | NA  | 3.54 | 0 |
| 53_extracted_k141_48032    | 1788  | No | NA | 2  | 0  | Low-quality    | Genome-fragment | NA  | 1.22 | 0 |
| 53_vs_k141_95416  full     | 1788  | No | NA | 0  | 1  | Low-quality    | Genome-fragment | NA  | 1.51 | 0 |
| SS_extracted_k141_25979    | 3817  | No | NA | 0  | 1  | Not-determined | Genome-fragment | NA  | 2.65 | 0 |
| 55_vs_k141_111026  full    | 1788  | No | NA | 0  | 0  | Low-quality    | Genome-fragment | NA  | 2.27 | 0 |
| SS_extracted_k141_33429    | 2300  | No | NA | 0  | 1  | Not-determined | Genome-fragment | NA  | 4.52 | 0 |
| SS_extracted_k141_130213   | 1645  | No | NA | 0  | 1  | Not-determined | Genome-fragment | NA  | 0    | 0 |
| SS_extracted_k141_118840   | 3075  | No | NA | 0  | 2  | Not-determined | Genome-fragment | NA  | 0    | 0 |
| 516_extracted_91505        | 1788  | No | NA | 0  | 0  | Low-quality    | Genome-fragment | NA  | 1.51 | 0 |
| SS_extracted_k141_26003    | 1649  | No | NA | 0  | 0  | Not-determined | Genome-fragment | NA  | 0    | 0 |
| 516_vs_k6159  full         | 1788  | No | NA | 0  | 3  | Low-quality    | Genome-fragment | NA  | 2.65 | 0 |
| SS_extracted_k141_118864   | 1868  | No | NA | 0  | 1  | Not-determined | Genome-fragment | NA  | 0    | 0 |
| 516_vs_79369  full         | 1788  | No | NA | 0  | 0  | Low-quality    | Genome-fragment | NA  | 2.27 | 0 |
| 56_vs_k141_14875  102gene  | 1275  | No | NA | 0  | 3  | Not-determined | Genome-fragment | NA  | 4.52 | 0 |
| SS_extracted_k141_87314    | 1788  | No | NA | 1  | 0  | Low-quality    | Genome-fragment | NA  | 0    | 0 |
| SS_extracted_k141_87314    | 2498  | No | NA | 0  | 0  | Not-determined | Genome-fragment | NA  | 0    | 0 |
| SS_extracted_k141_94087    | 2079  | No | NA | 0  | 0  | Not-determined | Genome-fragment | NA  | 0    | 0 |
| SS_extracted_k141_87335    | 1247  | No | NA | 0  | 0  | Not-determined | Genome-fragment | NA  | 0    | 0 |
| SS_extracted_k141_45427    | 1071  | No | NA | 0  | 2  | Not-determined | Genome-fragment | NA  | 0    | 0 |
| SS_extracted_k141_69568    | 1114  | No | NA | 0  | 0  | Not-determined | Genome-fragment | NA  | 0    | 0 |
| SS_extracted_k141_74590    | 2152  | No | NA | 0  | 0  | Not-determined | Genome-fragment | NA  | 0    | 0 |
| SS_extracted_k141_112127   | 1126  | No | NA | 0  | 1  | Not-determined | Genome-fragment | NA  | 0    | 0 |
| 58_vs_k141_207711  full    | 1788  | No | NA | 2  | 0  | Low-quality    | Genome-fragment | NA  | 4.24 | 0 |
| 517_vs_k141_138542  full   | 1789  | No | NA | 0  | 0  | Low-quality    | Genome-fragment | NA  | 1.04 | 0 |
| SS_extracted_k141_94131    | 1098  | No | NA | 0  | 2  | Not-determined | Genome-fragment | NA  | 0    | 0 |
| SS_extracted_k141_118971   | 1198  | No | NA | 0  | 1  | Not-determined | Genome-fragment | NA  | 0    | 0 |
| SS_extracted_k141_118973   | 1079  | No | NA | 0  | 0  | Not-determined | Genome-fragment | NA  | 0    | 0 |
| SS_extracted_k141_38978    | 1451  | No | NA | 0  | 1  | Not-determined | Genome-fragment | NA  | 0    | 0 |
| SS_extracted_k141_130325   | 1124  | No | NA | 0  | 0  | Not-determined | Genome-fragment | NA  | 0    | 0 |
| SS_extracted_k141_130332   | 3156  | No | NA | 0  | 0  | Not-determined | Genome-fragment | NA  | 0    | 0 |
| SS_extracted_k141_124960   | 3372  | No | NA | 0  | 1  | Not-determined | Genome-fragment | NA  | 0    | 0 |
| 511_vs_k141_992471  full   | 1789  | No | NA | 0  | 1  | Low-quality    | Genome-fragment | NA  | 4.27 | 0 |
| SS_extracted_k141_130343   | 8272  | No | NA | 0  | 2  | Not-determined | Genome-fragment | NA  | 4.18 | 0 |
| 511_vs_k141_67468  full    | 1789  | No | NA | 0  | 1  | Low-quality    | Genome-fragment | NA  | 3.04 | 0 |
| 514_extracted_k141_62088   | 1789  | No | NA | 0  | 0  | Low-quality    | Genome-fragment | NA  | 0    | 0 |
| SS_extracted_k141_3988     | 29546 | No | NA | 0  | 13 | Not-determined | Genome-fragment | NA  | 2.84 | 0 |
| 53_vs_k141_35781  full     | 1789  | No | NA | 0  | 0  | Low-quality    | Genome-fragment | NA  | 0    | 0 |
| SS_extracted_k141_125609   | 25998 | No | NA | 0  | 2  | Not-determined | Genome-fragment | NA  | 0    | 0 |
| SS_extracted_k141_106718   | 5682  | No | NA | 0  | 1  | Not-determined | Genome-fragment | NA  | 0    | 0 |
| SS_extracted_k141_124990   | 2787  | No | NA | 0  | 1  | Not-determined | Genome-fragment | NA  | 0    | 0 |
| SS_extracted_k141_106743   | 3498  | No | NA | 0  | 4  | Not-determined | Genome-fragment | NA  | 0    | 0 |
| SS_extracted_k141_106752   | 3985  | No | NA | 0  | 0  | Low-quality    | Genome-fragment | NA  | 0    | 0 |
| SS_extracted_k141_70272    | 1789  | No | NA | 1  | 0  | Low-quality    | Genome-fragment | NA  | 3.83 | 0 |
| 57_vs_126266  full         | 1789  | No | NA | 1  | 0  | Low-quality    | Genome-fragment | NA  | 2.5  | 0 |
| 57_vs_25654  102gene       | 1789  | No | NA | 0  | 0  | Low-quality    | Genome-fragment | NA  | 0    | 0 |
| SS_extracted_k141_52074    | 1137  | No | NA | 0  | 0  | Not-determined | Genome-fragment | NA  | 0    | 0 |
| SS_extracted_k141_39086    | 2601  | No | NA | 0  | 0  | Not-determined | Genome-fragment | NA  | 0.84 | 0 |
| 516_extracted_42860        | 1789  | No | NA | 0  | 0  | Low-quality    | Genome-fragment | NA  | 0    | 0 |
| SS_extracted_k141_106838   | 1689  | No | NA | 0  | 4  | Not-determined | Genome-fragment | NA  | 0.43 | 0 |
| 510_vs_1884  full          | 1789  | No | NA | 0  | 0  | Low-quality    | Genome-fragment | NA  | 2.23 | 0 |
| SS_extracted_k141_106872   | 1781  | No | NA | 0  | 0  | Not-determined | Genome-fragment | NA  | 2.84 | 0 |
| 54_extracted_1279          | 1789  | No | NA | 0  | 0  | Low-quality    | Genome-fragment | NA  | 2.88 | 0 |
| SS_extracted_k141_142279   | 1000  | No | NA | 0  | 0  | Not-determined | Genome-fragment | NA  | 4.25 | 0 |
| 56_vs_k141_9814  full      | 1789  | No | NA | 0  | 0  | Low-quality    | Genome-fragment | NA  | 0    | 0 |
| 58_extracted_k141_38455    | 1789  | No | NA | 0  | 1  | Low-quality    | Genome-fragment | NA  | 0    | 0 |
| 511_extracted_k141_86115   | 1790  | No | NA | 2  | 0  | Low-quality    | Genome-fragment | NA  | 0    | 0 |
| SS_extracted_k141_125153   | 4511  | No | NA | 0  | 0  | Not-determined | Genome-fragment | NA  | 0    | 0 |
| SS_extracted_k141_142321   | 1244  | No | NA | 0  | 1  | Not-determined | Genome-fragment | NA  | 0    | 0 |
| SS_extracted_k141_87587    | 1244  | No | NA | 0  | 2  | Not-determined | Genome-fragment | NA  | 0    | 0 |
| SS_extracted_k141_45670    | 5870  | No | NA | 0  | 4  | Not-determined | Genome-fragment | NA  | 0    | 0 |
| SS_extracted_k141_99049    | 1198  | No | NA | 0  | 1  | Not-determined | Genome-fragment | NA  | 0    | 0 |
| SS_extracted_k141_142363   | 3135  | No | NA | 0  | 1  | Not-determined | Genome-fragment | NA  | 0    | 0 |
| SS_extracted_k141_74661    | 40404 | No | NA | 40 | 1  | High-quality   | High-quality    | 100 | 0    | 0 |
| SS_extracted_k141_140570   | 1028  | No | NA | 0  | 0  | Not-determined | Genome-fragment | NA  | 3.33 | 0 |
| 53_vs_k141_10800  full     | 1790  | No | NA | 0  | 0  | Low-quality    | Genome-fragment | NA  | 3.95 | 0 |
| 55_vs_k141_128346  full    | 1790  | No | NA | 2  | 0  | Low-quality    | Genome-fragment | NA  | 1.35 | 0 |
| 516_extracted_36843        | 1790  | No | NA | 0  | 0  | Low-quality    | Genome-fragment | NA  | 0    | 0 |
| SS_extracted_k141_80629    | 6049  | No | NA | 0  | 3  | Not-determined | Genome-fragment | NA  | 0    | 0 |
| SS_extracted_k141_107039   | 1498  | No | NA | 0  | 0  | Not-determined | Genome-fragment | NA  | 0    | 0 |
| SS_extracted_k141_4305     | 1116  | No | NA | 0  | 1  | Not-determined | Genome-fragment | NA  | 0    | 0 |
| SS_extracted_k141_125300   | 1062  | No | NA | 0  | 0  | Not-determined | Genome-fragment | NA  | 0    | 0 |
| SS_extracted_k141_33893    | 1531  | No | NA | 0  | 0  | Not-determined | Genome-fragment | NA  | 0    | 0 |
| 512_vs_k141_125621  full   | 1790  | No | NA | 2  | 0  | Low-quality    | Genome-fragment | NA  | 4.23 | 0 |
| 517_extracted_k141_63625   | 1791  | No | NA | 0  | 0  | Low-quality    | Genome-fragment | NA  | 2.74 | 0 |
| SS_extracted_k141_135765   | 1104  | No | NA | 0  | 0  | Not-determined | Genome-fragment | NA  | 0    | 0 |
| SS_extracted_k141_125333   | 1576  | No | NA | 0  | 0  | Not-determined | Genome-fragment | NA  | 0    | 0 |
| SS_extracted_k141_63697    | 7317  | No | NA | 0  | 6  | Not-determined | Genome-fragment | NA  | 0    | 0 |
| SS_extracted_k141_74695    | 1120  | No | NA | 0  | 2  | Not-determined | Genome-fragment | NA  | 4.51 | 0 |
| 511_extracted_k141_32723   | 1791  | No | NA | 1  | 0  | Low-quality    | Genome-fragment | NA  | 4.62 | 0 |
| 511_vs_k141_27875  full    | 1791  | No | NA | 1  | 0  | Low-quality    | Genome-fragment | NA  | 0    | 0 |
| SS_extracted_k141_107098   | 2016  | No | NA | 0  | 0  | Not-determined | Genome-fragment | NA  | 0    | 0 |
| SS_extracted_k141_130648   | 2332  | No | NA | 0  | 1  | Not-determined | Genome-fragment | NA  | 0    | 0 |
| SS_extracted_k141_45780    | 4561  | No | NA | 0  | 3  | Not-determined | Genome-fragment | NA  | 0    | 0 |
| SS_extracted_k141_80608    | 1791  | No | NA | 0  | 1  | Low-quality    | Genome-fragment | NA  | 2.54 | 0 |
| 53_vs_k141_107043  full    | 1791  | No | NA | 0  | 0  | Low-quality    | Genome-fragment | NA  | 4.03 | 0 |
| SS_extracted_k141_941      | 1791  | No | NA | 5  | 0  | Low-quality    | Genome-fragment | NA  | 5.91 | 0 |
| 55_vs_k141_36355  full     | 1791  | No | NA | 0  | 0  | Low-quality    | Genome-fragment | NA  | 2.73 | 0 |
| 58_vs_k141_142022  102gene | 1791  | No | NA | 0  | 0  | Low-quality    | Genome-fragment | NA  | 1.44 | 0 |
| SS_extracted_k141_107112   | 1597  | No | NA | 0  | 1  | Not-determined | Genome-fragment | NA  | 0    | 0 |
| 511_vs_k141_67471  full    | 1792  | No | NA | 0  | 0  | Low-quality    | Genome-fragment | NA  | 3.61 | 0 |
| SS_extracted_k141_69636    | 1863  | No | NA | 0  | 2  | Not-determined | Genome-fragment | NA  | 4.55 | 0 |
| 516_vs_94793  full         | 1792  | No | NA | 2  | 0  | Low-quality    | Genome-fragment | NA  | 0    | 0 |
| SS_extracted_k141_119137   | 4649  | No | NA | 0  | 3  | Not-determined | Genome-fragment | NA  | 2.58 | 0 |
| 512_vs_k141_61327  full    | 1792  | No | NA | 0  | 2  | Low-quality    | Genome-fragment | NA  | 0    | 0 |
| SS_extracted_k141_115383   | 1975  | No | NA | 0  | 0  | Not-determined | Genome-fragment | NA  | 0    | 0 |
| SS_extracted_k141_130762   | 1527  | No | NA | 0  | 0  | Not-determined | Genome-fragment | NA  | 0    | 0 |
| 517_vs_k141_17594  full    | 1793  | No | NA | 1  | 0  | Low-quality    | Genome-fragment | NA  | 4.54 | 0 |
| 511_vs_k141_69219  full    | 1793  | No | NA | 0  | 0  | Low-quality    | Genome-fragment | NA  | 4.61 | 0 |
| SS_extracted_k141_34065    | 1340  | No | NA | 0  | 0  | Not-determined | Genome-fragment | NA  | 4.44 | 0 |
| 514_extracted_k141_62496   | 1793  | No | NA | 0  | 0  | Low-quality    | Genome-fragment | NA  | 0    | 0 |
| SS_extracted_k141_34092    | 1304  | No | NA | 0  | 0  | Not-determined | Genome-fragment | NA  | 0    | 0 |
| SS_extracted_k141_125473   | 4304  | No | NA | 0  | 0  | Not-determined | Genome-fragment | NA  | 0    | 0 |
| SS_extracted_k141_45927    | 1021  | No | NA | 0  | 0  | Not-determined | Genome-fragment | NA  | 0.66 | 0 |
| 514_vs_k141_22263  full    | 1793  | No | NA | 1  | 0  | Low-quality    | Genome-fragment | NA  | 3.7  | 0 |
| 51_extracted_k141_125558   | 1793  | No | NA | 0  | 0  | Low-quality    | Genome-fragment | NA  | 1.17 | 0 |
| SS_extracted_k141_69705    | 5126  | No | NA | 0  | 1  | Not-determined | Genome-fragment | NA  | 1.02 | 0 |
| SS_extracted_k141_87084    | 1793  | No | NA | 0  | 0  | Low-quality    | Genome-fragment | NA  | 4.84 | 0 |
| 55_vs_k141_11790  full     | 1793  | No | NA | 0  | 0  | Low-quality    | Genome-fragment | NA  | 0    | 0 |
| 510_extracted_55290        | 1793  | No | NA | 0  | 0  | Low-quality    | Genome-fragment | NA  | 0    | 0 |
| SS_extracted_k141_125563   | 1817  | No | NA | 0  | 1  | Not-determined | Genome-fragment | NA  | 0.66 | 0 |
| SS_extracted_k141_99306    | 1412  | No | NA | 0  | 1  | Not-determined | Genome-fragment | NA  | 0    | 0 |
| 510_vs_59767  full         | 1793  | No | NA | 0  | 1  | Low-quality    | Genome-fragment | NA  | 0.6  | 0 |
| SS_extracted_k141_69757    | 3339  | No | NA | 0  | 1  | Not-determined | Genome-fragment | NA  | 0    | 0 |
| SS_extracted_k141_112516   | 1002  | No | NA | 0  | 1  | Not-determined | Genome-fragment | NA  | 0    | 0 |
| 59_extracted_k141_34185    | 1913  | No | NA | 0  | 0  | Not-determined | Genome-fragment | NA  | 3.84 | 0 |
| 58_vs_k141_133481  full    | 1793  | No | NA | 0  | 0  | Low-quality    | Genome-fragment | NA  | 0    | 0 |
| SS_extracted_k141_125654   | 1041  | No | NA | 0  | 2  | Not-determined | Genome-fragment | NA  | 2.84 | 0 |
| SS_extracted_k141_74763    | 1559  | No | NA | 0  | 0  | Not-determined | Genome-fragment | NA  | 1.09 | 0 |
| SS_extracted_k141_119312   | 1354  | No | NA | 0  | 0  | Not-determined | Genome-fragment | NA  | 4.5  | 0 |
| 59_vs_k141_63602  full     | 1794  | No | NA | 0  | 0  | Low-quality    | Genome-fragment | NA  | 4.22 | 0 |
| SS_extracted_k141_69816    | 2439  | No | NA | 0  | 1  | Not-determined | Genome-fragment | NA  | 2.28 | 0 |
| 511_vs_k141_29955  full    | 1794  | No | NA | 0  | 0  | Low-quality    | Genome-fragment | NA  | 4.25 | 0 |
| 57_extracted_91523         | 1794  | No | NA | 0  | 0  | Low-quality    | Genome-fragment | NA  | 0    | 0 |
| SS_extracted_k141_125701   | 1611  | No | NA | 0  | 2  | Not-determined | Genome-fragment | NA  | 0    | 0 |
| SS_extracted_k141_63880    | 7335  | No | NA | 0  | 0  | Not-determined | Genome-fragment | NA  | 0    | 0 |
| 516_vs_100358  full        | 1794  | No | NA | 1  | 0  | Low-quality    | Genome-fragment | NA  | 4.41 | 0 |
| 510_vs_81265  full         | 1794  | No | NA | 0  | 0  | Low-quality    | Genome-fragment | NA  | 3.69 | 0 |
| 517_vs_k141_59211  full    | 1795  | No | NA | 1  | 0  | Low-quality    | Genome-fragment | NA  | 4.23 | 0 |
| SS_extracted_k141_63905    | 1561  | No | NA | 0  | 1  | Not-determined | Genome-fragment | NA  | 0    | 0 |
| SS_extracted_k141_130910   | 3058  | No | NA | 0  | 2  | Not-determined | Genome-fragment | NA  | 1.91 | 0 |
| 511_vs_k141_37551  full    | 1795  | No | NA | 0  |    |                |                 |     |      |   |



|                            |       |    |    |    |    |                |                 |       |   |
|----------------------------|-------|----|----|----|----|----------------|-----------------|-------|---|
| S5_vs_k141_96857 full      | 1796  | No | NA | 0  | 0  | Low-quality    | Genome-fragment | 3.66  | 0 |
| S16_vs_18964 full          | 1796  | No | NA | 0  | 0  | Low-quality    | Genome-fragment | 3     | 0 |
| S16_vs_54734 full          | 1796  | No | NA | 1  | 0  | Low-quality    | Genome-fragment | 2.68  | 0 |
| S16_vs_135475 full         | 1796  | No | NA | 0  | 1  | Low-quality    | Genome-fragment | 0.97  | 0 |
| S5_extracted_k141_107678   | 2280  | No | NA | 0  | 0  | Not-determined | Genome-fragment | NA    | 0 |
| S5_extracted_k141_116059   | 1187  | No | NA | 0  | 1  | Not-determined | Genome-fragment | NA    | 0 |
| S5_extracted_k141_34586    | 1229  | No | NA | 0  | 2  | Not-determined | Genome-fragment | NA    | 0 |
| S5_extracted_k141_4979     | 2952  | No | NA | 0  | 0  | Not-determined | Genome-fragment | NA    | 0 |
| S5_extracted_k141_44055    | 1027  | No | NA | 0  | 2  | Not-determined | Genome-fragment | NA    | 0 |
| S12_extracted_k141_121377  | 1796  | No | NA | 2  | 0  | Low-quality    | Genome-fragment | 4.26  | 0 |
| S5_extracted_k141_55993    | 1220  | No | NA | 0  | 0  | Not-determined | Genome-fragment | NA    | 0 |
| S12_vs_k141_52736 full     | 1796  | No | NA | 0  | 0  | Low-quality    | Genome-fragment | 1.7   | 0 |
| S5_extracted_k141_56877    | 5708  | No | NA | 0  | 4  | Not-determined | Genome-fragment | NA    | 0 |
| S8_extracted_k141_99780    | 1796  | No | NA | 0  | 1  | Low-quality    | Genome-fragment | 1.35  | 0 |
| S8_vs_k141_89758 full      | 1796  | No | NA | 0  | 0  | Low-quality    | Genome-fragment | 3.9   | 0 |
| S5_extracted_k141_107744   | 1052  | No | NA | 0  | 0  | Not-determined | Genome-fragment | NA    | 0 |
| S5_extracted_k141_88363    | 1014  | No | NA | 0  | 0  | Not-determined | Genome-fragment | NA    | 0 |
| S5_extracted_k141_131154   | 1021  | No | NA | 0  | 0  | Not-determined | Genome-fragment | NA    | 0 |
| S5_extracted_k141_21748    | 1922  | No | NA | 0  | 0  | Not-determined | Genome-fragment | NA    | 0 |
| S5_extracted_k141_107776   | 1148  | No | NA | 0  | 1  | Not-determined | Genome-fragment | NA    | 0 |
| S5_extracted_k141_113030   | 1153  | No | NA | 0  | 1  | Not-determined | Genome-fragment | NA    | 0 |
| S8_vs_k141_50885 full      | 1796  | No | NA | 0  | 0  | Low-quality    | Genome-fragment | 4.27  | 0 |
| S5_extracted_k141_21767    | 5972  | No | NA | 0  | 6  | Not-determined | Genome-fragment | NA    | 0 |
| S5_extracted_k141_107802   | 1046  | No | NA | 0  | 1  | Not-determined | Genome-fragment | NA    | 0 |
| S11_extracted_k141_22345   | 1797  | No | NA | 1  | 0  | Low-quality    | Genome-fragment | 4.15  | 0 |
| S5_extracted_k141_80989    | 1082  | No | NA | 0  | 1  | Not-determined | Genome-fragment | NA    | 0 |
| S13_vs_6499 full           | 1797  | No | NA | 0  | 0  | Low-quality    | Genome-fragment | 1.32  | 0 |
| S5_extracted_k141_56963    | 3478  | No | NA | 0  | 3  | Not-determined | Genome-fragment | NA    | 0 |
| S13_vs_24334 full          | 1797  | No | NA | 0  | 1  | Low-quality    | Genome-fragment | 3.8   | 0 |
| S5_extracted_k141_53140    | 1274  | No | NA | 0  | 0  | Not-determined | Genome-fragment | NA    | 0 |
| S13_vs_63324 full          | 1797  | No | NA | 1  | 0  | Low-quality    | Genome-fragment | 32.52 | 0 |
| S5_extracted_k141_94937    | 2855  | No | NA | 0  | 0  | Not-determined | Genome-fragment | NA    | 0 |
| S14_vs_k141_13958 full     | 1797  | No | NA | 0  | 1  | Low-quality    | Genome-fragment | 3.22  | 0 |
| S5_extracted_k141_98455    | 1797  | No | NA | 3  | 0  | Low-quality    | Genome-fragment | 8.18  | 0 |
| S7_vs_16789 full           | 1797  | No | NA | 0  | 0  | Low-quality    | Genome-fragment | 3.57  | 0 |
| S5_extracted_k141_16022    | 1043  | No | NA | 0  | 0  | Not-determined | Genome-fragment | NA    | 0 |
| S16_extracted_115911       | 1797  | No | NA | 0  | 0  | Low-quality    | Genome-fragment | 1.64  | 0 |
| S5_extracted_k141_99771    | 4957  | No | NA | 0  | 0  | Not-determined | Genome-fragment | NA    | 0 |
| S16_vs_154049 lit2gene     | 1797  | No | NA | 0  | 0  | Low-quality    | Genome-fragment | 4.64  | 0 |
| S12_extracted_k141_87355   | 1797  | No | NA | 0  | 0  | Low-quality    | Genome-fragment | 1.88  | 0 |
| S5_extracted_k141_99817    | 1013  | No | NA | 0  | 1  | Not-determined | Genome-fragment | NA    | 0 |
| S5_extracted_k141_13632    | 1018  | No | NA | 0  | 1  | Not-determined | Genome-fragment | NA    | 0 |
| S8_extracted_k141_42902    | 1797  | No | NA | 1  | 0  | Low-quality    | Genome-fragment | 5.57  | 0 |
| S5_extracted_k141_21801    | 1000  | No | NA | 0  | 1  | Not-determined | Genome-fragment | NA    | 0 |
| S5_extracted_k141_34854    | 1343  | No | NA | 0  | 0  | Not-determined | Genome-fragment | NA    | 0 |
| S8_vs_k141_120620 full     | 1797  | No | NA | 0  | 0  | Low-quality    | Genome-fragment | 4.68  | 0 |
| S5_extracted_k141_5297     | 1270  | No | NA | 0  | 1  | Not-determined | Genome-fragment | NA    | 0 |
| S5_extracted_k141_39748    | 1555  | No | NA | 0  | 1  | Not-determined | Genome-fragment | NA    | 0 |
| S5_extracted_k141_39760    | 1081  | No | NA | 0  | 0  | Not-determined | Genome-fragment | NA    | 0 |
| S1_extracted_k141_26460    | 1798  | No | NA | 0  | 1  | Low-quality    | Genome-fragment | 1.61  | 0 |
| S1_vs_k141_8332 full       | 1798  | No | NA | 2  | 0  | Low-quality    | Genome-fragment | 4.36  | 0 |
| S5_extracted_k141_95104    | 1358  | No | NA | 0  | 0  | Not-determined | Genome-fragment | NA    | 0 |
| S7_vs_88916 full           | 1798  | No | NA | 1  | 0  | Low-quality    | Genome-fragment | 4.06  | 0 |
| S5_extracted_k141_142932   | 3032  | No | NA | 0  | 0  | Not-determined | Genome-fragment | NA    | 0 |
| S16_vs_54277 full          | 1798  | No | NA | 1  | 0  | Low-quality    | Genome-fragment | 3.5   | 0 |
| S5_extracted_k141_95119    | 1089  | No | NA | 0  | 0  | Not-determined | Genome-fragment | NA    | 0 |
| S16_vs_99835 full          | 1798  | No | NA | 2  | 0  | Low-quality    | Genome-fragment | 3.75  | 0 |
| S5_extracted_k141_108046   | 6977  | No | NA | 0  | 7  | Not-determined | Genome-fragment | NA    | 0 |
| S16_vs_129870 full         | 1798  | No | NA | 1  | 0  | Low-quality    | Genome-fragment | 1.21  | 0 |
| S16_vs_172000 full         | 1798  | No | NA | 0  | 0  | Low-quality    | Genome-fragment | 4.65  | 0 |
| S1_vs_k141_21889           | 4235  | No | NA | 18 | 0  | Complete       | High-quality    | 100   | 0 |
| S1_vs_k141_147279 full     | 1799  | No | NA | 0  | 0  | Low-quality    | Genome-fragment | 0.44  | 0 |
| S5_extracted_k141_75075    | 17572 | No | NA | 0  | 21 | Not-determined | Genome-fragment | NA    | 0 |
| S3_extracted_k141_97296    | 1799  | No | NA | 4  | 0  | Low-quality    | Genome-fragment | 5.93  | 0 |
| S3_vs_k141_117325 lit2gene | 1799  | No | NA | 2  | 0  | Low-quality    | Genome-fragment | 3.1   | 0 |
| S5_extracted_k141_95186    | 3099  | No | NA | 0  | 0  | Not-determined | Genome-fragment | NA    | 0 |
| S5_extracted_k141_136446   | 1117  | No | NA | 0  | 1  | Not-determined | Genome-fragment | NA    | 0 |
| S5_extracted_k141_10296    | 1575  | No | NA | 0  | 0  | Not-determined | Genome-fragment | NA    | 0 |
| S5_vs_k141_17271 lit2gene  | 1799  | No | NA | 0  | 0  | Low-quality    | Genome-fragment | 4.03  | 0 |
| S7_vs_51295 full           | 1799  | No | NA | 1  | 0  | Low-quality    | Genome-fragment | 4.14  | 0 |
| S5_extracted_k141_57108    | 5885  | No | NA | 0  | 5  | Not-determined | Genome-fragment | NA    | 0 |
| S5_extracted_k141_21977    | 1058  | No | NA | 0  | 1  | Not-determined | Genome-fragment | NA    | 0 |
| S5_extracted_k141_35049    | 1803  | No | NA | 0  | 1  | Not-determined | Genome-fragment | NA    | 0 |
| S16_extracted_43581        | 1799  | No | NA | 1  | 0  | Low-quality    | Genome-fragment | 2.82  | 0 |
| S5_extracted_k141_80853    | 1794  | No | NA | 0  | 0  | Not-determined | Genome-fragment | NA    | 0 |
| S5_extracted_k141_53462    | 1430  | No | NA | 0  | 1  | Not-determined | Genome-fragment | NA    | 0 |
| S5_extracted_k141_136504   | 1479  | No | NA | 0  | 1  | Not-determined | Genome-fragment | NA    | 0 |
| S5_extracted_k141_53465    | 3435  | No | NA | 0  | 0  | Not-determined | Genome-fragment | NA    | 0 |
| S10_vs_3076 full           | 1799  | No | NA | 1  | 0  | Low-quality    | Genome-fragment | 1.62  | 0 |
| S5_extracted_k141_75212    | 3186  | No | NA | 0  | 0  | Not-determined | Genome-fragment | NA    | 0 |
| S5_extracted_k141_53506    | 1726  | No | NA | 0  | 1  | Not-determined | Genome-fragment | NA    | 0 |
| S5_extracted_k141_10397    | 3802  | No | NA | 0  | 0  | Not-determined | Genome-fragment | NA    | 0 |
| S12_vs_k141_75412 full     | 1799  | No | NA | 1  | 0  | Low-quality    | Genome-fragment | 3.2   | 0 |
| S5_extracted_k141_16242    | 1028  | No | NA | 0  | 1  | Not-determined | Genome-fragment | NA    | 0 |
| S5_extracted_k141_108227   | 1001  | No | NA | 0  | 2  | Not-determined | Genome-fragment | NA    | 0 |
| S15_extracted_56969        | 1799  | No | NA | 0  | 0  | Low-quality    | Genome-fragment | 0.93  | 0 |
| S6_vs_k141_44033 full      | 1799  | No | NA | 0  | 2  | Low-quality    | Genome-fragment | 3.84  | 0 |
| S5_extracted_k141_75285    | 1274  | No | NA | 0  | 1  | Not-determined | Genome-fragment | NA    | 0 |
| S8_vs_k141_6148 full       | 1799  | No | NA | 0  | 0  | Low-quality    | Genome-fragment | 1.51  | 0 |
| S5_extracted_k141_16299    | 1135  | No | NA | 0  | 0  | Not-determined | Genome-fragment | NA    | 0 |
| S5_extracted_k141_16302    | 1437  | No | NA | 0  | 0  | Not-determined | Genome-fragment | NA    | 0 |
| S17_extracted_k141_8847    | 1800  | No | NA | 0  | 0  | Low-quality    | Genome-fragment | 4.57  | 0 |
| S11_vs_k141_37311 full     | 1800  | No | NA | 0  | 0  | Low-quality    | Genome-fragment | 4.11  | 0 |
| S13_vs_63334 full          | 1800  | No | NA | 0  | 1  | Low-quality    | Genome-fragment | 2.16  | 0 |
| S5_extracted_k141_22030    | 1471  | No | NA | 0  | 0  | Not-determined | Genome-fragment | NA    | 0 |
| S7_vs_128694 full          | 1800  | No | NA | 1  | 0  | Low-quality    | Genome-fragment | 2.88  | 0 |
| S5_extracted_k141_88990    | 3973  | No | NA | 0  | 1  | Not-determined | Genome-fragment | NA    | 0 |
| S5_extracted_k141_75333    | 1144  | No | NA | 0  | 2  | Not-determined | Genome-fragment | NA    | 0 |
| S5_extracted_k141_116450   | 7901  | No | NA | 0  | 0  | Not-determined | Genome-fragment | NA    | 0 |
| S7_vs_63409 lit2gene       | 1800  | No | NA | 1  | 0  | Low-quality    | Genome-fragment | 4.13  | 0 |
| S5_extracted_k141_113417   | 7325  | No | NA | 0  | 1  | Not-determined | Genome-fragment | NA    | 0 |
| S8_extracted_k141_98324    | 1800  | No | NA | 0  | 0  | Low-quality    | Genome-fragment | 1.32  | 0 |
| S8_vs_k141_127858 full     | 1800  | No | NA | 0  | 0  | Low-quality    | Genome-fragment | 3.96  | 0 |
| S1_vs_k141_12589 full      | 1801  | No | NA | 3  | 0  | Low-quality    | Genome-fragment | 4.12  | 0 |
| S5_extracted_k141_123562   | 1801  | No | NA | 0  | 0  | Low-quality    | Genome-fragment | 2.14  | 0 |
| S5_extracted_k141_100031   | 1376  | No | NA | 0  | 1  | Not-determined | Genome-fragment | NA    | 0 |
| S5_extracted_k141_143156   | 1123  | No | NA | 0  | 1  | Not-determined | Genome-fragment | NA    | 0 |
| S5_extracted_k141_22864    | 1801  | No | NA | 0  | 1  | Low-quality    | Genome-fragment | 5.08  | 0 |
| S5_vs_k141_6551 full       | 1801  | No | NA | 0  | 0  | Low-quality    | Genome-fragment | 2.95  | 0 |
| S5_vs_k141_44883 full      | 1801  | No | NA | 0  | 0  | Low-quality    | Genome-fragment | 5.27  | 0 |
| S12_vs_k141_9311 full      | 1801  | No | NA | 0  | 0  | Low-quality    | Genome-fragment | 2.29  | 0 |
| S5_extracted_k141_95426    | 1314  | No | NA | 0  | 0  | Not-determined | Genome-fragment | NA    | 0 |
| S8_vs_k141_139594 full     | 1801  | No | NA | 1  | 0  | Low-quality    | Genome-fragment | 5.34  | 0 |
| S5_extracted_k141_95454    | 1753  | No | NA | 0  | 0  | Not-determined | Genome-fragment | NA    | 0 |
| S11_extracted_k141_101211  | 1802  | No | NA | 0  | 0  | Low-quality    | Genome-fragment | 21.95 | 0 |
| S5_extracted_k141_64722    | 1872  | No | NA | 0  | 0  | Not-determined | Genome-fragment | NA    | 0 |
| S5_extracted_k141_26901    | 1035  | No | NA | 0  | 0  | Not-determined | Genome-fragment | NA    | 0 |
| S14_vs_k141_45423 lit2gene | 1802  | No | NA | 2  | 0  | Low-quality    | Genome-fragment | 5.77  | 0 |
| S5_extracted_k141_75479    | 1099  | No | NA | 0  | 1  | Not-determined | Genome-fragment | NA    | 0 |
| S5_extracted_k141_70605    | 1949  | No | NA | 0  | 0  | Not-determined | Genome-fragment | NA    | 0 |
| S5_extracted_k141_95477    | 1027  | No | NA | 0  | 1  | Not-determined | Genome-fragment | NA    | 0 |
| S3_extracted_k141_4022     | 1802  | No | NA | 1  | 0  | Low-quality    | Genome-fragment | 1.1   | 0 |
| S8_vs_k141_33907 full      | 1802  | No | NA | 1  | 0  | Low-quality    | Genome-fragment | 4.29  | 0 |
| S5_extracted_k141_70615    | 11406 | No | NA | 0  | 4  | Not-determined | Genome-fragment | NA    | 0 |
| S5_extracted_k141_53682    | 1020  | No | NA | 0  | 0  | Not-determined | Genome-fragment | NA    | 0 |
| S5_extracted_k141_131630   | 7240  | No | NA | 0  | 6  | Not-determined | Genome-fragment | NA    | 0 |
| S17_extracted_k141_126995  | 1803  | No | NA | 1  | 0  | Low-quality    | Genome-fragment | 2.55  | 0 |
| S5_extracted_k141_20111    | 1546  | No | NA | 0  | 1  | Not-determined | Genome-fragment | NA    | 0 |
| S5_extracted_k141_108522   | 1086  | No | NA | 0  | 0  | Not-determined | Genome-fragment | NA    | 0 |
| S5_extracted_k141_70664    | 1145  | No | NA | 0  | 1  | Not-determined | Genome-fragment | NA    | 0 |
| S5_extracted_k141_57251    | 2496  | No | NA | 0  | 1  | Not-determined | Genome-fragment | NA    | 0 |
| S5_extracted_k141_100209   | 1739  | No | NA | 0  | 0  | Not-determined | Genome-fragment | NA    | 0 |
| S5_extracted_k141_10458    | 5413  | No | NA | 0  | 4  | Not-determined | Genome-fragment | NA    | 0 |
| S5_extracted_k141_75538    | 2414  | No | NA | 0  | 2  | Not-determined | Genome-fragment | NA    | 0 |
| S5_extracted_k141_30371    | 1713  | No | NA | 0  | 1  | Not-determined | Genome-fragment | NA    | 0 |
| S11_vs_k141_62267 full     | 1803  | No | NA | 0  | 0  | Low-quality    | Genome-fragment | 3.23  | 0 |
| S5_extracted_k141_95581    | 1093  | No | NA | 0  | 1  | Not-determined | Genome-fragment | NA    | 0 |
| S14_vs_k141_112253 full    | 1803  | No | NA | 0  | 1  | Low-quality    | Genome-fragment | 1.56  | 0 |
| S5_extracted_k141_64850    | 1312  | No | NA | 0  | 1  | Not-determined | Genome-fragment | NA    | 0 |
| S1_vs_k141_142657 full     | 1803  | No | NA | 0  | 0  | Low-quality    | Genome-fragment | 3.84  | 0 |
| S5_extracted_k141_22219    | 4218  | No | NA | 0  | 4  | Not-determined | Genome-fragment | NA    | 0 |
| S5_extracted_k141_115707   | 2496  | No | NA | 0  | 0  | Not-determined | Genome-fragment | NA    | 0 |
| S5_extracted_k141_57308    | 3758  | No | NA | 0  | 3  | Not-determined | Genome-fragment | NA    | 0 |
| S3_vs_k141_3992 full       | 1803  | No | NA | 0  | 0  | Low-quality    | Genome-fragment | 1.25  | 0 |
| S5_extracted_k141_116744   | 2615  | No | NA | 0  | 1  | Not-determined | Genome-fragment | NA    | 0 |
| S5_extracted_k141_16827    | 1204  | No |    |    |    |                |                 |       |   |



|                           |       |     |      |    |                |                 |    |       |       |
|---------------------------|-------|-----|------|----|----------------|-----------------|----|-------|-------|
| 55_extracted_k141_108770  | 1554  | NA  | 0    | 1  | Not-determined | Genome-fragment | NA | 4.42  | 0     |
| 513_vs_k141_75802  l2gene | 1805  | NA  | 0    | 0  | Low-quality    | Genome-fragment | NA | 0.93  | 0     |
| 51_extracted_k141_154936  | 1805  | NA  | 0    | 0  | Not-determined | Genome-fragment | NA | 1.18  | 0     |
| 55_extracted_k141_10522   | 4365  | NA  | 0    | 3  | Not-determined | Genome-fragment | NA | 3.91  | 0     |
| 51_extracted_k141_69196   | 1805  | NA  | 1    | 0  | Low-quality    | Genome-fragment | NA | 4.14  | 0     |
| 55_extracted_k141_70984   | 1260  | NA  | 0    | 0  | Not-determined | Genome-fragment | NA | 1.74  | 0     |
| 55_extracted_k141_126952  | 1169  | NA  | 0    | 0  | Not-determined | Genome-fragment | NA | 1.63  | 0     |
| 55_extracted_k141_22384   | 1646  | NA  | 0    | 0  | Not-determined | Genome-fragment | NA | 2.94  | 0     |
| 516_vs_k141_54687  full   | 1805  | NA  | 0    | 1  | Low-quality    | Genome-fragment | NA | 3.96  | 0     |
| 55_extracted_k141_136869  | 1163  | NA  | 0    | 0  | Not-determined | Genome-fragment | NA | 1.22  | 0     |
| 512_extracted_k141_90015  | 1805  | NA  | 1    | 0  | Low-quality    | Genome-fragment | NA | 5.42  | 0     |
| 55_extracted_k141_46446   | 2689  | NA  | 0    | 0  | Not-determined | Genome-fragment | NA | 4.31  | 0     |
| 58_vs_k141_5046  full     | 1805  | NA  | 1    | 0  | Low-quality    | Genome-fragment | NA | 1.54  | 0     |
| 55_extracted_k141_53888   | 11327 | NA  | 0    | 5  | Not-determined | Genome-fragment | NA | 4.09  | 0     |
| 55_extracted_k141_17012   | 1094  | NA  | 0    | 1  | Not-determined | Genome-fragment | NA | 3.78  | 0     |
| 55_extracted_k141_120547  | 1011  | NA  | 0    | 0  | Not-determined | Genome-fragment | NA | 5.24  | 0     |
| 517_vs_k141_163244  full  | 1806  | NA  | 0    | 0  | Low-quality    | Genome-fragment | NA | 3.96  | 0     |
| 55_extracted_k141_73029   | 1039  | NA  | 0    | 1  | Not-determined | Genome-fragment | NA | 2.94  | 0     |
| 55_extracted_k141_100460  | 1076  | NA  | 0    | 1  | Not-determined | Genome-fragment | NA | 3.96  | 0     |
| 511_vs_k141_86527  full   | 1806  | NA  | 2    | 0  | Low-quality    | Genome-fragment | NA | 1.22  | 0     |
| 511_vs_k141_18686  full   | 1806  | NA  | 3    | 0  | Low-quality    | Genome-fragment | NA | 5.42  | 0     |
| 55_extracted_k141_136900  | 1311  | NA  | 0    | 2  | Not-determined | Genome-fragment | NA | 4.31  | 0     |
| 55_extracted_k141_89372   | 12638 | NA  | 0    | 10 | Not-determined | Genome-fragment | NA | 1.54  | 0     |
| 55_extracted_k141_46532   | 1071  | NA  | 0    | 0  | Not-determined | Genome-fragment | NA | 4.14  | 0     |
| 514_vs_k141_79306  full   | 1806  | NA  | 1    | 0  | Low-quality    | Genome-fragment | NA | 3.78  | 0     |
| 55_extracted_k141_53973   | 2303  | NA  | 0    | 2  | Not-determined | Genome-fragment | NA | 5.24  | 0     |
| 55_extracted_k141_100504  | 1638  | NA  | 0    | 2  | Not-determined | Genome-fragment | NA | 3.96  | 0     |
| 53_vs_k141_93696  full    | 1806  | NA  | 0    | 0  | Low-quality    | Genome-fragment | NA | 1.22  | 0     |
| 55_extracted_k141_136940  | 1361  | NA  | 0    | 1  | Not-determined | Genome-fragment | NA | 5.42  | 0     |
| 55_extracted_k141_40841   | 1806  | NA  | 0    | 0  | Low-quality    | Genome-fragment | NA | 4.31  | 0     |
| 55_extracted_k141_54025   | 2574  | NA  | 0    | 1  | Not-determined | Genome-fragment | NA | 1.54  | 0     |
| 55_extracted_k141_17107   | 1460  | NA  | 0    | 0  | Not-determined | Genome-fragment | NA | 4.14  | 0     |
| 55_extracted_k141_108911  | 1078  | NA  | 0    | 1  | Not-determined | Genome-fragment | NA | 3.96  | 0     |
| 55_extracted_k141_46606   | 1250  | NA  | 0    | 0  | Not-determined | Genome-fragment | NA | 1.22  | 0     |
| 55_extracted_k141_5065    | 1804  | NA  | 0    | 1  | Not-determined | Genome-fragment | NA | 5.42  | 0     |
| 55_extracted_k141_120648  | 1042  | NA  | 0    | 1  | Not-determined | Genome-fragment | NA | 4.31  | 0     |
| 55_vs_k141_92238  l2gene  | 1806  | NA  | 2    | 0  | Low-quality    | Genome-fragment | NA | 1.54  | 0     |
| 55_extracted_k141_17000   | 1000  | NA  | 0    | 1  | Not-determined | Genome-fragment | NA | 4.14  | 0     |
| 516_extracted_4059        | 1806  | NA  | 0    | 0  | Low-quality    | Genome-fragment | NA | 3.78  | 0     |
| 55_extracted_k141_127128  | 1054  | NA  | 0    | 3  | Not-determined | Genome-fragment | NA | 1.22  | 0     |
| 510_vs_k141_18923  full   | 1806  | NA  | 0    | 0  | Low-quality    | Genome-fragment | NA | 5.42  | 0     |
| 512_vs_k141_96779  full   | 1806  | NA  | 0    | 0  | Low-quality    | Genome-fragment | NA | 4.31  | 0     |
| 55_extracted_k141_17228   | 1228  | NA  | 0    | 0  | Not-determined | Genome-fragment | NA | 1.54  | 0     |
| 55_extracted_k141_96025   | 2075  | NA  | 0    | 1  | Not-determined | Genome-fragment | NA | 4.14  | 0     |
| 512_vs_k141_65994  l2gene | 1806  | NA  | 1    | 0  | Low-quality    | Genome-fragment | NA | 2.64  | 0     |
| 58_vs_k141_6864  full     | 1806  | NA  | 0    | 0  | Low-quality    | Genome-fragment | NA | 1.34  | 0     |
| 517_vs_k141_25528  full   | 1807  | NA  | 1    | 0  | Low-quality    | Genome-fragment | NA | 1.4   | 0     |
| 55_extracted_k141_6032    | 31144 | NA  | 15   | 0  | High-quality   | High-quality    | NA | 99.12 | 0     |
| 55_extracted_k141_81732   | 2074  | NA  | 0    | 0  | Not-determined | Genome-fragment | NA | 3     | 0     |
| 55_extracted_k141_57548   | 2124  | NA  | 0    | 0  | Not-determined | Genome-fragment | NA | 0     | 0     |
| 513_vs_k141_36630  full   | 1807  | NA  | 0    | 1  | Low-quality    | Genome-fragment | NA | 3     | 0     |
| 55_extracted_k141_40577   | 1556  | NA  | 0    | 2  | Not-determined | Genome-fragment | NA | 0     | 0     |
| 55_extracted_k141_132196  | 1664  | NA  | 0    | 3  | Not-determined | Genome-fragment | NA | 0     | 0     |
| 55_extracted_k141_10853   | 1031  | NA  | 0    | 0  | Not-determined | Genome-fragment | NA | 0     | 0     |
| 55_extracted_k141_73163   | 1383  | NA  | 0    | 1  | Not-determined | Genome-fragment | NA | 0     | 0     |
| 55_extracted_k141_89557   | 1592  | NA  | 0    | 0  | Not-determined | Genome-fragment | NA | 0     | 0     |
| 514_vs_k141_53977  full   | 1807  | NA  | 1    | 0  | Low-quality    | Genome-fragment | NA | 2.99  | 0     |
| 514_vs_k141_10390  full   | 1807  | NA  | 0    | 1  | Low-quality    | Genome-fragment | NA | 3.44  | 0     |
| 57_vs_k141_101248  full   | 1807  | NA  | 0    | 1  | Low-quality    | Genome-fragment | NA | 3.38  | 0     |
| 55_extracted_k141_89612   | 1329  | NA  | 0    | 0  | Not-determined | Genome-fragment | NA | 4.45  | 0     |
| 512_extracted_k141_4784   | 1807  | NA  | 0    | 0  | Low-quality    | Genome-fragment | NA | 0     | 0     |
| 55_extracted_k141_114298  | 1011  | NA  | 0    | 1  | Not-determined | Genome-fragment | NA | 0     | 0     |
| 55_extracted_k141_54358   | 1049  | NA  | 0    | 1  | Not-determined | Genome-fragment | NA | 0     | 0     |
| 55_extracted_k141_17462   | 3126  | NA  | 0    | 2  | Not-determined | Genome-fragment | NA | 4.21  | 0     |
| 512_vs_k141_35254  full   | 1807  | NA  | 0    | 0  | Low-quality    | Genome-fragment | NA | 0     | 0     |
| 55_extracted_k141_57583   | 1898  | NA  | 0    | 2  | Not-determined | Genome-fragment | NA | 2.75  | 0     |
| 55_extracted_k141_114336  | 1199  | NA  | 0    | 0  | Not-determined | Genome-fragment | NA | 4.01  | 0     |
| 58_vs_k141_26173  full    | 1807  | NA  | 0    | 1  | Low-quality    | Genome-fragment | NA | 0     | 0     |
| 517_vs_k141_134127  full  | 1808  | NA  | 0    | 10 | Not-determined | Genome-fragment | NA | 0     | 0     |
| 55_extracted_k141_40750   | 10422 | NA  | 0    | 0  | Not-determined | Genome-fragment | NA | 0     | 0     |
| 55_extracted_k141_65448   | 1223  | NA  | 0    | 0  | Not-determined | Genome-fragment | NA | 0     | 0     |
| 55_extracted_k141_81853   | 1750  | NA  | 0    | 1  | Not-determined | Genome-fragment | NA | 0     | 0     |
| 55_extracted_k141_109215  | 1388  | NA  | 0    | 0  | Not-determined | Genome-fragment | NA | 0     | 0     |
| 55_extracted_k141_114389  | 1528  | NA  | 0    | 0  | Not-determined | Genome-fragment | NA | 0.68  | 0     |
| 511_vs_k141_74517  full   | 1808  | NA  | 0    | 0  | Low-quality    | Genome-fragment | NA | 5.47  | 0     |
| 514_vs_k141_692  full     | 1808  | NA  | 1    | 0  | Low-quality    | Genome-fragment | NA | 3.83  | 0     |
| 514_vs_k141_86210  full   | 1808  | NA  | 0    | 0  | Low-quality    | Genome-fragment | NA | 0.39  | 0     |
| 55_extracted_k141_114418  | 1155  | NA  | 0    | 0  | Not-determined | Genome-fragment | NA | 1.25  | 0     |
| 55_vs_k141_50538  full    | 1808  | NA  | 0    | 1  | Low-quality    | Genome-fragment | NA | 0     | 0     |
| 516_vs_k141_36394  full   | 1808  | NA  | 0    | 3  | Not-determined | Genome-fragment | NA | 1.29  | 0     |
| 55_extracted_k141_47068   | 1057  | NA  | 0    | 1  | Not-determined | Genome-fragment | NA | 3.86  | 17.04 |
| 55_extracted_k141_22929   | 1364  | NA  | 0    | 0  | Not-determined | Genome-fragment | NA | 0     | 0     |
| 56_vs_k141_5687  full     | 1808  | NA  | 0    | 0  | Low-quality    | Genome-fragment | NA | 5.99  | 0     |
| 58_vs_k141_33879  full    | 1808  | Yes | 1    | 1  | Low-quality    | Genome-fragment | NA | 4.06  | 0     |
| 55_extracted_k141_10957   | 2094  | NA  | 1500 | 0  | Not-determined | Genome-fragment | NA | 3.45  | 0     |
| 29_extracted_k141_55276   | 1809  | NA  | 3    | 0  | Low-quality    | Genome-fragment | NA | 0     | 0     |
| 55_extracted_k141_81895   | 1416  | NA  | 0    | 0  | Not-determined | Genome-fragment | NA | 0     | 0     |
| 59_extracted_k141_55865   | 1809  | NA  | 0    | 0  | Low-quality    | Genome-fragment | NA | 0     | 0     |
| 29_vs_k141_80453  full    | 1809  | NA  | 0    | 3  | Low-quality    | Genome-fragment | NA | 0     | 0     |
| 511_vs_k141_80092  full   | 1809  | NA  | 3    | 0  | Low-quality    | Genome-fragment | NA | 0     | 0     |
| 55_extracted_k141_54528   | 1066  | NA  | 0    | 1  | Not-determined | Genome-fragment | NA | 0     | 0     |
| 55_extracted_k141_17661   | 3914  | NA  | 0    | 0  | Not-determined | Genome-fragment | NA | 0     | 0     |
| 55_extracted_k141_114535  | 1342  | NA  | 0    | 2  | Not-determined | Genome-fragment | NA | 3.42  | 0     |
| 51_extracted_k141_94036   | 1809  | NA  | 0    | 0  | Low-quality    | Genome-fragment | NA | 0     | 0     |
| 55_extracted_k141_89878   | 1040  | NA  | 0    | 1  | Not-determined | Genome-fragment | NA | 1.68  | 0     |
| 51_vs_k141_45044  full    | 1809  | NA  | 0    | 0  | Low-quality    | Genome-fragment | NA | 0     | 0     |
| 55_extracted_k141_47231   | 6791  | NA  | 0    | 5  | Not-determined | Genome-fragment | NA | 0     | 0     |
| 55_extracted_k141_121079  | 1489  | NA  | 0    | 0  | Not-determined | Genome-fragment | NA | 0     | 0     |
| 55_extracted_k141_137208  | 1345  | NA  | 0    | 1  | Not-determined | Genome-fragment | NA | 2.48  | 0     |
| 53_extracted_k141_120872  | 1809  | NA  | 1    | 0  | Low-quality    | Genome-fragment | NA | 1.54  | 0     |
| 55_extracted_k141_23054   | 1345  | NA  | 0    | 0  | Not-determined | Genome-fragment | NA | 4.41  | 0     |
| 510_extracted_19818       | 1809  | NA  | 0    | 0  | Low-quality    | Genome-fragment | NA | 0     | 0     |
| 512_vs_k141_9871  full    | 1809  | NA  | 0    | 0  | Low-quality    | Genome-fragment | NA | 0     | 0     |
| 517_vs_k141_118428  full  | 1810  | NA  | 1    | 0  | Low-quality    | Genome-fragment | NA | 0     | 0     |
| 55_extracted_k141_89950   | 2288  | NA  | 0    | 2  | Not-determined | Genome-fragment | NA | 3.43  | 0     |
| 53_vs_k141_116546  full   | 1810  | NA  | 0    | 0  | Low-quality    | Genome-fragment | NA | 3.14  | 0     |
| 53_vs_k141_93733  full    | 1810  | NA  | 0    | 0  | Low-quality    | Genome-fragment | NA | 1.4   | 0     |
| 55_extracted_k141_137236  | 3442  | NA  | 0    | 3  | Not-determined | Genome-fragment | NA | 0     | 0     |
| 512_vs_k141_163188  full  | 1810  | NA  | 0    | 0  | Low-quality    | Genome-fragment | NA | 0     | 0     |
| 55_extracted_k141_132395  | 1378  | NA  | 0    | 0  | Not-determined | Genome-fragment | NA | 4.06  | 0     |
| 55_extracted_k141_89980   | 1648  | NA  | 0    | 1  | Not-determined | Genome-fragment | NA | 4.42  | 0     |
| 29_vs_k141_68620  full    | 1811  | NA  | 0    | 0  | Low-quality    | Genome-fragment | NA | 0     | 0     |
| 511_vs_k141_69759  full   | 1811  | NA  | 2    | 0  | Low-quality    | Genome-fragment | NA | 0     | 0     |
| 55_extracted_k141_143889  | 2421  | NA  | 0    | 0  | Not-determined | Genome-fragment | NA | 0     | 0     |
| 55_extracted_k141_26386   | 3588  | NA  | 0    | 0  | Not-determined | Genome-fragment | NA | 0     | 0     |
| 55_extracted_k141_137260  | 16081 | NA  | 6    | 0  | Complete       | High-quality    | NA | 100   | 0     |
| 514_vs_k141_111651  full  | 1811  | NA  | 1    | 0  | Low-quality    | Genome-fragment | NA | 3.19  | 0     |
| 55_extracted_k141_137289  | 1212  | NA  | 0    | 0  | Not-determined | Genome-fragment | NA | 2.03  | 0     |
| 56_vs_k141_1180  full     | 1811  | NA  | 0    | 0  | Low-quality    | Genome-fragment | NA | 0     | 0     |
| 55_extracted_k141_100813  | 2702  | NA  | 0    | 0  | Not-determined | Genome-fragment | NA | 0     | 0     |
| 55_extracted_k141_17901   | 2641  | NA  | 0    | 0  | Not-determined | Genome-fragment | NA | 0     | 0     |
| 55_extracted_k141_131513  | 11950 | NA  | 0    | 2  | Not-determined | Genome-fragment | NA | 3.46  | 0     |
| 517_extracted_k141_6965   | 1812  | NA  | 1    | 0  | Low-quality    | Genome-fragment | NA | 1.79  | 0     |
| 51_vs_k141_13670  full    | 1812  | NA  | 0    | 1  | Low-quality    | Genome-fragment | NA | 0     | 0     |
| 55_extracted_k141_143946  | 3447  | NA  | 0    | 0  | Not-determined | Genome-fragment | NA | 0     | 0     |
| 55_extracted_k141_114754  | 11172 | NA  | 0    | 8  | Not-determined | Genome-fragment | NA | 4.03  | 0     |
| 516_extracted_154978      | 1812  | NA  | 0    | 1  | Low-quality    | Genome-fragment | NA | 0.54  | 0     |
| 55_extracted_k141_71465   | 2304  | NA  | 0    | 0  | Not-determined | Genome-fragment | NA | 0.31  | 0     |
| 55_extracted_k141_73470   | 1517  | NA  | 0    | 0  | Not-determined | Genome-fragment | NA | 0     | 0     |
| 516_vs_k141_74986  full   | 1812  | NA  | 1    | 0  | Low-quality    | Genome-fragment | NA | 3.98  | 0     |
| 55_extracted_k141_47482   | 1443  | NA  | 0    | 5  | Not-determined | Genome-fragment | NA | 0.55  | 0     |
| 515_extracted_58254       | 1812  | NA  | 0    | 0  | Low-quality    | Genome-fragment | NA | 3.35  | 0     |
| 517_vs_k141_159929  full  | 1813  | NA  | 0    | 1  | Low-quality    | Genome-fragment | NA | 0     | 0     |
| 55_extracted_k141_96464   | 2568  | NA  | 0    | 1  | Not-determined | Genome-fragment | NA | 0     | 0     |
| 51_vs_k141_12331  full    | 1813  | NA  | 0    | 0  | Low-quality    | Genome-fragment | NA | 0     | 0     |
| 55_extracted_k141_27660   | 1212  | NA  | 0    | 0  | Not-determined | Genome-fragment | NA | 0     | 0     |
| 55_extracted_k141_132620  | 1092  | NA  | 0    | 0  | Not-determined | Genome-fragment | NA | 2.29  | 0     |
| 53_extracted_k141_61918   | 1813  | NA  | 0    | 0  | Low-quality    | Genome-fragment | NA | 4.06  | 0     |
| 57_vs_k141_40985  full    | 1813  | NA  | 0    | 0  | Low-quality    | Genome-fragment | NA | 0.79  | 0     |
| 516_vs_k141_21455  full   | 1813  | NA  | 0    | 2  | Low-quality    | Genome-fragment | NA | 0     | 0     |



|                           |       |    |    |    |    |                |                 |                 |       |   |
|---------------------------|-------|----|----|----|----|----------------|-----------------|-----------------|-------|---|
| 55_extracted_k141_90346   | 1331  | No | NA | 0  | 1  | Not-determined | Genome-fragment | NA              |       | 0 |
| 55_vx_k141_1622  H2gene   | 1815  | No | NA | 0  | 0  | Low-quality    | Genome-fragment | NA              | 4.35  | 0 |
| 55_extracted_k141_144159  | 1559  | No | NA | 0  | 0  | Not-determined | Genome-fragment | NA              |       | 0 |
| 57_extracted_95958        | 1815  | No | NA | 0  | 1  | Low-quality    | Genome-fragment | NA              | 1.85  | 0 |
| 57_vx_59482  full         | 1815  | No | NA | 2  | 0  | Low-quality    | Genome-fragment | NA              | 3.52  | 0 |
| 55_extracted_k141_18198   | 5711  | No | NA | 0  | 1  | Not-determined | Genome-fragment | NA              |       | 0 |
| 55_extracted_k141_65815   | 1809  | No | NA | 0  | 0  | Not-determined | Genome-fragment | NA              |       | 0 |
| 57_vx_83636  full         | 1815  | No | NA | 2  | 0  | Low-quality    | Genome-fragment | NA              | 3.67  | 0 |
| 55_extracted_k141_27926   | 1289  | No | NA | 0  | 1  | Not-determined | Genome-fragment | NA              |       | 0 |
| 510_vx_51581  full        | 1815  | No | NA | 0  | 0  | Low-quality    | Genome-fragment | NA              | 3.37  | 0 |
| 55_extracted_k141_47946   | 1058  | No | NA | 0  | 1  | Not-determined | Genome-fragment | NA              |       | 0 |
| 56_vx_k141_10621  full    | 1815  | No | NA | 3  | 0  | Low-quality    | Genome-fragment | NA              | 4.96  | 0 |
| 58_extracted_k141_145355  | 1815  | No | NA | 0  | 2  | Low-quality    | Genome-fragment | NA              | 0.75  | 0 |
| 58_vx_k141_62392  H2gene  | 1815  | No | NA | 0  | 0  | Low-quality    | Genome-fragment | NA              | 5.7   | 0 |
| 511_vx_k141_96232  full   | 1816  | No | NA | 0  | 0  | Low-quality    | Genome-fragment | NA              | 4.33  | 0 |
| 55_extracted_k141_41215   | 3664  | No | NA | 0  | 1  | Not-determined | Genome-fragment | NA              |       | 0 |
| 514_extracted_k141_110917 | 1816  | No | NA | 1  | 0  | Low-quality    | Genome-fragment | NA              | 5.46  | 0 |
| 55_extracted_k141_72029   | 1288  | No | NA | 0  | 0  | Not-determined | Genome-fragment | NA              |       | 0 |
| 51_vx_k141_18625  full    | 1816  | No | NA | 3  | 0  | Low-quality    | Genome-fragment | NA              | 2.12  | 0 |
| 55_extracted_k141_11367   | 1992  | No | NA | 0  | 1  | Not-determined | Genome-fragment | NA              |       | 0 |
| 55_extracted_k141_23686   | 1176  | No | NA | 0  | 1  | Not-determined | Genome-fragment | NA              |       | 0 |
| 55_extracted_k141_76832   | 1050  | No | NA | 0  | 1  | Not-determined | Genome-fragment | NA              | 100   | 0 |
| 55_extracted_k141_115209  | 1441  | No | NA | 0  | 0  | Not-determined | Genome-fragment | NA              |       | 0 |
| 517_vx_k141_76224  full   | 1817  | No | NA | 2  | 0  | Low-quality    | Genome-fragment | NA              | 3.74  | 0 |
| 55_extracted_k141_72098   | 1254  | No | NA | 0  | 1  | Not-determined | Genome-fragment | NA              |       | 0 |
| 55_extracted_k141_115227  | 1819  | No | NA | 0  | 1  | Not-determined | Genome-fragment | NA              |       | 0 |
| 55_extracted_k141_72117   | 6973  | No | NA | 0  | 6  | Not-determined | Genome-fragment | NA              |       | 0 |
| 55_extracted_k141_97056   | 6000  | No | NA | 0  | 5  | Not-determined | Genome-fragment | NA              |       | 0 |
| 55_extracted_k141_72140   | 1011  | No | NA | 0  | 0  | Not-determined | Genome-fragment | NA              |       | 0 |
| 55_extracted_k141_133348  | 1597  | No | NA | 0  | 0  | Not-determined | Genome-fragment | NA              |       | 0 |
| 55_extracted_k141_90691   | 5188  | No | NA | 0  | 4  | Not-determined | Genome-fragment | NA              |       | 0 |
| 51_vx_k141_134223  H2gene | 1817  | No | NA | 0  | 1  | Not-determined | Genome-fragment | NA              | 1.87  | 0 |
| 55_extracted_k141_76900   | 2565  | No | NA | 0  | 1  | Not-determined | Genome-fragment | NA              |       | 0 |
| 55_extracted_k141_115314  | 1289  | No | NA | 0  | 1  | Not-determined | Genome-fragment | NA              |       | 0 |
| 55_extracted_k141_28022   | 1108  | No | NA | 0  | 0  | Not-determined | Genome-fragment | NA              |       | 0 |
| 55_extracted_k141_101065  | 1671  | No | NA | 0  | 3  | Not-determined | Genome-fragment | NA              |       | 0 |
| 53_vx_k141_93327  full    | 1817  | No | NA | 0  | 0  | Low-quality    | Genome-fragment | NA              | 3.18  | 0 |
| 55_extracted_k141_133440  | 1302  | No | NA | 0  | 1  | Not-determined | Genome-fragment | NA              |       | 0 |
| 55_extracted_k141_11450   | 3214  | No | NA | 18 | 1  | Complete       | High-quality    | Genome-fragment | 100   | 0 |
| 55_extracted_k141_11456   | 5272  | No | NA | 0  | 2  | Not-determined | Genome-fragment | NA              |       | 0 |
| 55_extracted_k141_11460   | 1092  | No | NA | 0  | 1  | Not-determined | Genome-fragment | NA              |       | 0 |
| 516_extracted_156788      | 1817  | No | NA | 0  | 2  | Low-quality    | Genome-fragment | NA              | 3.09  | 0 |
| 55_extracted_k141_11499   | 1652  | No | NA | 0  | 2  | Not-determined | Genome-fragment | NA              |       | 0 |
| 516_vx_138451  full       | 1817  | No | NA | 0  | 0  | Low-quality    | Genome-fragment | NA              | 3.43  | 0 |
| 516_vx_148019  full       | 1817  | No | NA | 0  | 3  | Low-quality    | Genome-fragment | NA              | 0.51  | 0 |
| 55_extracted_k141_23846   | 1061  | No | NA | 0  | 0  | Not-determined | Genome-fragment | NA              |       | 0 |
| 512_vx_k141_112061  full  | 1817  | No | NA | 0  | 0  | Low-quality    | Genome-fragment | NA              | 1.66  | 0 |
| 512_vx_k141_82053  H2gene | 1817  | No | NA | 2  | 0  | Low-quality    | Genome-fragment | NA              | 3.97  | 0 |
| 55_extracted_k141_28061   | 3834  | No | NA | 16 | 1  | Complete       | High-quality    | Genome-fragment | 100   | 0 |
| 52_vx_k141_11089  full    | 1817  | No | NA | 1  | 0  | Low-quality    | Genome-fragment | NA              | 4.32  | 0 |
| 58_extracted_k141_60430   | 1817  | No | NA | 0  | 0  | Low-quality    | Genome-fragment | NA              | 4.1   | 0 |
| 55_extracted_k141_77064   | 2257  | No | NA | 0  | 0  | Not-determined | Genome-fragment | NA              |       | 0 |
| 55_extracted_k141_41416   | 1006  | No | NA | 0  | 2  | Not-determined | Genome-fragment | NA              |       | 0 |
| 55_extracted_k141_101151  | 1133  | No | NA | 0  | 1  | Not-determined | Genome-fragment | NA              |       | 0 |
| 514_vx_k141_14649  full   | 1818  | No | NA | 1  | 0  | Low-quality    | Genome-fragment | NA              | 4.06  | 0 |
| 51_vx_k141_36667  full    | 1818  | No | NA | 0  | 0  | Low-quality    | Genome-fragment | NA              |       | 0 |
| 55_extracted_k141_137738  | 5517  | No | NA | 0  | 0  | Not-determined | Genome-fragment | NA              |       | 0 |
| 55_extracted_k141_72383   | 3235  | No | NA | 0  | 0  | Not-determined | Genome-fragment | NA              |       | 0 |
| 51_vx_k141_93347  full    | 1818  | No | NA | 0  | 0  | Low-quality    | Genome-fragment | NA              | 4.5   | 0 |
| 55_extracted_k141_11620   | 1010  | No | NA | 0  | 1  | Not-determined | Genome-fragment | NA              |       | 0 |
| 512_vx_k141_24114  full   | 1818  | No | NA | 0  | 1  | Low-quality    | Genome-fragment | NA              | 0.89  | 0 |
| 55_extracted_k141_11654   | 1023  | No | NA | 0  | 0  | Not-determined | Genome-fragment | NA              |       | 0 |
| 55_extracted_k141_77224   | 1139  | No | NA | 0  | 1  | Not-determined | Genome-fragment | NA              |       | 0 |
| 55_extracted_k141_90802   | 1032  | No | NA | 0  | 1  | Not-determined | Genome-fragment | NA              |       | 0 |
| 55_extracted_k141_101275  | 6507  | No | NA | 0  | 4  | Not-determined | Genome-fragment | NA              |       | 0 |
| 58_vx_k141_10227  full    | 1818  | No | NA | 0  | 0  | Low-quality    | Genome-fragment | NA              | 0.76  | 0 |
| 55_extracted_k141_137805  | 3570  | No | NA | 0  | 2  | Not-determined | Genome-fragment | NA              |       | 0 |
| 55_extracted_k141_137814  | 1363  | No | NA | 0  | 1  | Not-determined | Genome-fragment | NA              |       | 0 |
| 58_vx_k141_143226  full   | 1818  | No | NA | 2  | 0  | Low-quality    | Genome-fragment | NA              | 3     | 0 |
| 55_extracted_k141_72483   | 7851  | No | NA | 0  | 3  | Not-determined | Genome-fragment | NA              |       | 0 |
| 517_vx_k141_11842  full   | 1819  | No | NA | 0  | 0  | Low-quality    | Genome-fragment | NA              | 1.68  | 0 |
| 511_vx_k141_65181  full   | 1819  | No | NA | 0  | 1  | Low-quality    | Genome-fragment | NA              | 4.44  | 0 |
| 55_extracted_k141_137846  | 4070  | No | NA | 0  | 1  | Not-determined | Genome-fragment | NA              |       | 0 |
| 55_extracted_k141_48466   | 1149  | No | NA | 0  | 0  | Not-determined | Genome-fragment | NA              |       | 0 |
| 55_extracted_k141_13788   | 1188  | No | NA | 0  | 0  | Not-determined | Genome-fragment | NA              |       | 0 |
| 55_extracted_k141_90893   | 1015  | No | NA | 0  | 1  | Not-determined | Genome-fragment | NA              |       | 0 |
| 513_extracted_23690       | 1819  | No | NA | 0  | 0  | Low-quality    | Genome-fragment | NA              | 3.04  | 0 |
| 513_vx_k141_2  full       | 1819  | No | NA | 0  | 0  | Low-quality    | Genome-fragment | NA              | 6.27  | 0 |
| 51_extracted_k141_34103   | 1819  | No | NA | 1  | 0  | Low-quality    | Genome-fragment | NA              | 0.32  | 0 |
| 53_vx_k141_75949  full    | 1819  | No | NA | 0  | 2  | Low-quality    | Genome-fragment | NA              | 3.92  | 0 |
| 55_extracted_k141_24229   | 1096  | No | NA | 0  | 0  | Not-determined | Genome-fragment | NA              |       | 0 |
| 516_extracted_125591      | 1819  | No | NA | 0  | 1  | Low-quality    | Genome-fragment | NA              | 0.79  | 0 |
| 55_extracted_k141_72579   | 2045  | No | NA | 0  | 1  | Not-determined | Genome-fragment | NA              |       | 0 |
| 55_extracted_k141_41732   | 1000  | No | NA | 0  | 0  | Not-determined | Genome-fragment | NA              |       | 0 |
| 516_extracted_127074      | 1819  | No | NA | 0  | 0  | Low-quality    | Genome-fragment | NA              | 5.99  | 0 |
| 55_extracted_k141_101380  | 1366  | No | NA | 0  | 1  | Not-determined | Genome-fragment | NA              |       | 0 |
| 55_extracted_k141_66370   | 1673  | No | NA | 0  | 0  | Not-determined | Genome-fragment | NA              |       | 0 |
| 55_extracted_k141_72643   | 1064  | No | NA | 0  | 0  | Not-determined | Genome-fragment | NA              |       | 0 |
| 55_extracted_k141_58279   | 10670 | No | NA | 0  | 2  | Not-determined | Genome-fragment | NA              |       | 0 |
| 55_extracted_k141_137935  | 1403  | No | NA | 0  | 2  | Not-determined | Genome-fragment | NA              |       | 0 |
| 55_extracted_k141_28510   | 1061  | No | NA | 0  | 2  | Not-determined | Genome-fragment | NA              |       | 0 |
| 55_extracted_k141_66406   | 2458  | No | NA | 0  | 1  | Not-determined | Genome-fragment | NA              |       | 0 |
| 510_vx_45754  full        | 1819  | No | NA | 0  | 0  | Low-quality    | Genome-fragment | NA              | 3.56  | 0 |
| 55_extracted_k141_144833  | 1408  | No | NA | 0  | 1  | Not-determined | Genome-fragment | NA              |       | 0 |
| 55_extracted_k141_137995  | 2762  | No | NA | 0  | 2  | Not-determined | Genome-fragment | NA              |       | 0 |
| 55_extracted_k141_72743   | 1262  | No | NA | 0  | 1  | Not-determined | Genome-fragment | NA              |       | 0 |
| 512_vx_k141_176706  full  | 1819  | No | NA | 0  | 2  | Low-quality    | Genome-fragment | NA              | 0.87  | 0 |
| 55_extracted_k141_144910  | 6253  | No | NA | 0  | 4  | Not-determined | Genome-fragment | NA              |       | 0 |
| 55_extracted_k141_144912  | 1369  | No | NA | 0  | 1  | Not-determined | Genome-fragment | NA              |       | 0 |
| 55_extracted_k141_83018   | 3870  | No | NA | 0  | 1  | Not-determined | Genome-fragment | NA              |       | 0 |
| 55_extracted_k141_41368   | 5646  | No | NA | 0  | 4  | Not-determined | Genome-fragment | NA              |       | 0 |
| 55_extracted_k141_77412   | 1042  | No | NA | 0  | 2  | Not-determined | Genome-fragment | NA              |       | 0 |
| 55_extracted_k141_28629   | 3055  | No | NA | 0  | 3  | Not-determined | Genome-fragment | NA              |       | 0 |
| 53_vx_k141_86668  full    | 1820  | No | NA | 0  | 1  | Low-quality    | Genome-fragment | NA              | 0.49  | 0 |
| 55_extracted_k141_83161   | 5422  | No | NA | 0  | 2  | Not-determined | Genome-fragment | NA              |       | 0 |
| 55_extracted_k141_83177   | 1106  | No | NA | 0  | 1  | Not-determined | Genome-fragment | NA              |       | 0 |
| 57_vx_48129  full         | 1820  | No | NA | 1  | 0  | Low-quality    | Genome-fragment | NA              | 3.47  | 0 |
| 55_extracted_k141_42163   | 1278  | No | NA | 0  | 1  | Not-determined | Genome-fragment | NA              |       | 0 |
| 55_extracted_k141_145033  | 1296  | No | NA | 0  | 0  | Not-determined | Genome-fragment | NA              |       | 0 |
| 55_extracted_k141_145044  | 1199  | No | NA | 0  | 2  | Not-determined | Genome-fragment | NA              |       | 0 |
| 58_extracted_k141_44550   | 1820  | No | NA | 1  | 0  | Low-quality    | Genome-fragment | NA              | 0.96  | 0 |
| 55_extracted_k141_66553   | 1813  | No | NA | 0  | 1  | Not-determined | Genome-fragment | NA              |       | 0 |
| 55_extracted_k141_138093  | 6607  | No | NA | 0  | 3  | Not-determined | Genome-fragment | NA              |       | 0 |
| 55_extracted_k141_138094  | 1218  | No | NA | 0  | 0  | Not-determined | Genome-fragment | NA              |       | 0 |
| 58_extracted_k141_21877   | 1820  | No | NA | 0  | 0  | Low-quality    | Genome-fragment | NA              | 2.98  | 0 |
| 55_vx_k141_52295  full    | 1820  | No | NA | 0  | 1  | Low-quality    | Genome-fragment | NA              | 5.19  | 0 |
| 53_extracted_k141_100400  | 1821  | No | NA | 0  | 0  | Low-quality    | Genome-fragment | NA              | 1.54  | 0 |
| 55_extracted_k141_101494  | 16172 | No | NA | 0  | 12 | Not-determined | Genome-fragment | NA              |       | 0 |
| 55_extracted_k141_42406   | 2802  | No | NA | 0  | 0  | Not-determined | Genome-fragment | NA              |       | 0 |
| 55_extracted_k141_83453   | 1167  | No | NA | 0  | 0  | Not-determined | Genome-fragment | NA              |       | 0 |
| 55_vx_k141_66113  full    | 1821  | No | NA | 0  | 2  | Low-quality    | Genome-fragment | NA              | 2.75  | 0 |
| 55_extracted_k141_77703   | 38551 | No | NA | 27 | 0  | Medium-quality | Genome-fragment | NA              | 64.37 | 0 |
| 55_extracted_k141_83522   | 1971  | No | NA | 0  | 1  | Not-determined | Genome-fragment | NA              |       | 0 |
| 55_extracted_k141_145262  | 2338  | No | NA | 0  | 1  | Not-determined | Genome-fragment | NA              |       | 0 |
| 55_extracted_k141_101511  | 4695  | No | NA | 0  | 1  | Not-determined | Genome-fragment | NA              |       | 0 |
| 57_vx_31558  full         | 1821  | No | NA | 0  | 1  | Low-quality    | Genome-fragment | NA              | 5.07  | 0 |
| 55_vx_60364  full         | 1821  | No | NA | 0  | 0  | Low-quality    | Genome-fragment | NA              | 1.5   | 0 |
| 55_extracted_k141_145329  | 1238  | No | NA | 0  | 1  | Not-determined | Genome-fragment | NA              |       | 0 |
| 55_extracted_k141_138350  | 1805  | No | NA | 0  | 2  | Not-determined | Genome-fragment | NA              |       | 0 |
| 512_vx_k141_62957  full   | 1821  | No | NA | 0  | 0  | Low-quality    | Genome-fragment | NA              | 4.58  | 0 |
| 58_extracted_k141_173746  | 1821  | No | NA | 0  | 1  | Low-quality    | Genome-fragment | NA              | 4.06  | 0 |
| 517_vx_k141_176709  full  | 1822  | No | NA | 0  | 0  | Low-quality    | Genome-fragment | NA              | 1.82  | 0 |
| 55_extracted_k141_145417  | 1239  | No | NA | 0  | 2  | Not-determined | Genome-fragment | NA              |       | 0 |
| 511_vx_k141_17884  full   | 1822  | No | NA | 0  | 0  | Low-quality    | Genome-fragment | NA              | 2.46  | 0 |
| 55_extracted_k141_145445  | 3811  | No | NA | 0  | 3  | Not-determined | Genome-fragment | NA              |       | 0 |
| 511_vx_k141_84199  H2gene | 1822  | No |    |    |    |                |                 |                 |       |   |



|                           |        |     |    |      |              |                |                 |    |       |       |
|---------------------------|--------|-----|----|------|--------------|----------------|-----------------|----|-------|-------|
| SS_extracted_k141_102041  | 5817   | No  | NA | 0    | 2            | Not-determined | Genome-fragment | NA | 0     | 0     |
| S17_vs_k141_130343  full  | 1826   | No  | NA | 0    | 2            | Low-quality    | Genome-fragment | NA | 0.73  | 0     |
| S11_vs_k141_85123  full   | 1826   | No  | NA | 0    | 0            | Low-quality    | Genome-fragment | NA | 2.84  | 0     |
| SS_extracted_k141_138835  | 1149   | No  | NA | 0    | 0            | Not-determined | Genome-fragment | NA | 0     | 0     |
| SS_extracted_k141_145588  | 46058  | No  | NA | 19   | 1            | Complete       | High-quality    | NA | 100   | 0     |
| SS_extracted_k141_138867  | 1708   | No  | NA | 0    | 3            | Not-determined | Genome-fragment | NA | 0     | 0     |
| SS_extracted_k141_62622   | 1826   | No  | NA | 1    | 0            | Low-quality    | Genome-fragment | NA | 4.62  | 0     |
| SS_vs_k141_96731  full    | 1826   | No  | NA | 0    | 0            | Low-quality    | Genome-fragment | NA | 2.83  | 0     |
| SS_extracted_k141_78503   | 1058   | No  | NA | 0    | 0            | Not-determined | Genome-fragment | NA | 0     | 0     |
| SS_extracted_k141_138986  | 5380   | No  | NA | 0    | 5            | Not-determined | Genome-fragment | NA | 0     | 0     |
| S7_extracted_6037         | 1826   | No  | NA | 1    | 0            | Low-quality    | Genome-fragment | NA | 3.8   | 0     |
| SS_extracted_k141_102362  | 4495   | No  | NA | 0    | 7            | Not-determined | Genome-fragment | NA | 0     | 0     |
| SS_extracted_k141_59813   | 14769  | No  | NA | 0    | 7            | Not-determined | Genome-fragment | NA | 0     | 0     |
| S16_extracted_11470       | 1826   | No  | NA | 0    | 0            | Low-quality    | Genome-fragment | NA | 2.94  | 0     |
| SS_extracted_k141_78835   | 3544   | No  | NA | 0    | 3            | Not-determined | Genome-fragment | NA | 0     | 0     |
| SS_extracted_k141_102384  | 1229   | No  | NA | 0    | 0            | Not-determined | Genome-fragment | NA | 0     | 0     |
| SS_extracted_k141_145604  | 42930  | No  | NA | 15   | 1            | Complete       | High-quality    | NA | 100   | 0     |
| SS_extracted_k141_139108  | 6809   | No  | NA | 0    | 3            | Not-determined | Genome-fragment | NA | 2.46  | 0     |
| SS_vs_k141_10971  l2gene  | 1827   | No  | NA | 1    | 0            | Low-quality    | Genome-fragment | NA | 0     | 0     |
| SS_extracted_k141_102420  | 2404   | No  | NA | 0    | 1            | Not-determined | Genome-fragment | NA | 0     | 0     |
| S3_extracted_k141_122920  | 1827   | No  | NA | 0    | 0            | Low-quality    | Genome-fragment | NA | 1.88  | 0     |
| S3_extracted_k141_110200  | 1827   | Yes | NA | 483  | 1            | Low-quality    | Genome-fragment | NA | 0.31  | 73.56 |
| SS_extracted_k141_60005   | 5602   | No  | NA | 0    | 5            | Not-determined | Genome-fragment | NA | 0     | 0     |
| S3_vs_k141_123521  full   | 1827   | No  | NA | 1    | 0            | Low-quality    | Genome-fragment | NA | 3.77  | 0     |
| SS_extracted_k141_102491  | 11143  | No  | NA | 0    | 6            | Not-determined | Genome-fragment | NA | 0     | 0     |
| SS_extracted_k141_84793   | 1241   | No  | NA | 0    | 0            | Not-determined | Genome-fragment | NA | 0     | 0     |
| SS_extracted_k141_104549  | 1827   | No  | NA | 4    | 0            | Low-quality    | Genome-fragment | NA | 6.01  | 0     |
| SS_extracted_k141_84832   | 1967   | No  | NA | 0    | 0            | Not-determined | Genome-fragment | NA | 0     | 0     |
| SS_extracted_k141_101358  | 1047   | No  | NA | 0    | 0            | Low-quality    | Genome-fragment | NA | 0     | 0     |
| SS_vs_k141_105210  l2gene | 1827   | No  | NA | 1    | 0            | Low-quality    | Genome-fragment | NA | 4.77  | 0     |
| SS_extracted_k141_29967   | 1529   | No  | NA | 0    | 0            | Not-determined | Genome-fragment | NA | 0     | 0     |
| SS_extracted_k141_102166  | 6048   | No  | NA | 0    | 1            | Not-determined | Genome-fragment | NA | 0     | 0     |
| SS_extracted_k141_30042   | 1056   | No  | NA | 0    | 1            | Not-determined | Genome-fragment | NA | 0     | 0     |
| SS_extracted_k141_60147   | 1190   | No  | NA | 0    | 1            | Not-determined | Genome-fragment | NA | 0     | 0     |
| S12_vs_k141_132503  full  | 1827   | No  | NA | 1    | 0            | Low-quality    | Genome-fragment | NA | 4.98  | 0     |
| S6_vs_k141_16470  full    | 1827   | No  | NA | 0    | 0            | Low-quality    | Genome-fragment | NA | 3.58  | 0     |
| S17_extracted_k141_94867  | 1828   | No  | NA | 0    | 1            | Low-quality    | Genome-fragment | NA | 0.35  | 0     |
| SS_extracted_k141_102755  | 1644   | No  | NA | 0    | 1            | Not-determined | Genome-fragment | NA | 2.94  | 0     |
| S1_extracted_k141_34509   | 1828   | No  | NA | 0    | 0            | Low-quality    | Genome-fragment | NA | 1     | 0     |
| S3_vs_k141_81011  full    | 1828   | No  | NA | 0    | 0            | Low-quality    | Genome-fragment | NA | 2.56  | 0     |
| SS_extracted_k141_102858  | 1297   | No  | NA | 0    | 2            | Low-quality    | Genome-fragment | NA | 0     | 0     |
| S7_vs_20638  full         | 1828   | No  | NA | 0    | 0            | Not-determined | Genome-fragment | NA | 0     | 0     |
| SS_extracted_k141_139448  | 4957   | No  | NA | 0    | 0            | Low-quality    | Genome-fragment | NA | 2.52  | 0     |
| S12_vs_k141_25861  full   | 1828   | No  | NA | 1314 | 1            | Low-quality    | Genome-fragment | NA | 3.44  | 28.12 |
| S12_vs_k141_151368  full  | 1828   | Yes | NA | 1    | 1            | Low-quality    | Genome-fragment | NA | 5.97  | 0     |
| S5_extracted_k141_103119  | 1111   | No  | NA | 0    | 3            | Not-determined | Genome-fragment | NA | 3.45  | 0     |
| S8_extracted_k141_130769  | 1828   | No  | NA | 0    | 0            | Low-quality    | Genome-fragment | NA | 4.35  | 0     |
| S1_extracted_k141_143614  | 1829   | No  | NA | 0    | 0            | Low-quality    | Genome-fragment | NA | 100   | 0     |
| SS_extracted_k141_103152  | 1156   | No  | NA | 0    | 2            | Low-quality    | Genome-fragment | NA | 0     | 0     |
| SS_vs_k141_6140  full     | 1829   | No  | NA | 0    | 0            | Not-determined | Genome-fragment | NA | 0     | 0     |
| SS_extracted_k141_139591  | 1161   | No  | NA | 0    | 0            | Not-determined | Genome-fragment | NA | 100   | 0     |
| SS_extracted_k141_103200  | 38577  | No  | NA | 1    | High-quality | High-quality   | Genome-fragment | NA | 100   | 0     |
| SS_extracted_k141_60508   | 3586   | No  | NA | 0    | 3            | Not-determined | Genome-fragment | NA | 0     | 0     |
| SS_extracted_k141_60582   | 4539   | No  | NA | 0    | 2            | Not-determined | Genome-fragment | NA | 100   | 0     |
| SS_extracted_k141_60597   | 51608  | No  | NA | 16   | 2            | Complete       | High-quality    | NA | 100   | 0     |
| SS_extracted_k141_60989   | 1829   | No  | NA | 0    | 0            | Not-determined | Genome-fragment | NA | 0.63  | 0     |
| SS_extracted_k141_60672   | 1355   | No  | NA | 0    | 1            | Not-determined | Genome-fragment | NA | 0     | 0     |
| SS_vs_k141_64164  full    | 1829   | No  | NA | 0    | 1            | Low-quality    | Genome-fragment | NA | 97.19 | 0     |
| SS_vs_k141_60959  full    | 3547   | No  | NA | 0    | 3            | Not-determined | Genome-fragment | NA | 0     | 0     |
| SS_vs_k141_36605  full    | 39273  | No  | NA | 17   | 1            | High-quality   | High-quality    | NA | 100   | 0     |
| SS_vs_k141_6661  full     | 7517   | No  | NA | 0    | 2            | Not-determined | Genome-fragment | NA | 100   | 0     |
| SS_vs_k141_122344  full   | 36736  | No  | NA | 21   | 0            | High-quality   | High-quality    | NA | 100   | 0     |
| SS_vs_k141_122618  full   | 40649  | No  | NA | 20   | 0            | High-quality   | High-quality    | NA | 100   | 0     |
| SS_vs_k141_97574  full    | 177746 | No  | NA | 42   | 4            | High-quality   | High-quality    | NA | 100   | 0     |
| S7_extracted_80725        | 1830   | No  | NA | 1    | 0            | Low-quality    | Genome-fragment | NA | 3.95  | 0     |
| SS_vs_k141_37659  full    | 39786  | No  | NA | 17   | 2            | Medium-quality | Genome-fragment | NA | 58.01 | 0     |
| SS_vs_k141_67958  full    | 38068  | No  | NA | 11   | 0            | Medium-quality | Genome-fragment | NA | 78.56 | 0     |
| SS_vs_k141_68254  full    | 44015  | No  | NA | 20   | 0            | High-quality   | High-quality    | NA | 96.66 | 0     |
| SS_vs_k141_123766  full   | 4785   | No  | NA | 0    | 0            | Not-determined | Genome-fragment | NA | 98.29 | 0     |
| SS_vs_k141_118434  full   | 3666   | No  | NA | 0    | 0            | Not-determined | Genome-fragment | NA | 0     | 0     |
| SS_vs_k141_38949  full    | 44115  | No  | NA | 16   | 1            | High-quality   | High-quality    | NA | 3.31  | 0     |
| S14_vs_k141_7724  full    | 1831   | No  | NA | 0    | 13           | Not-determined | Genome-fragment | NA | 71.74 | 0     |
| SS_vs_k141_21164  full    | 33592  | No  | NA | 0    | 1            | Medium-quality | Genome-fragment | NA | 90.03 | 0     |
| SS_vs_k141_120079  full   | 38193  | No  | NA | 16   | 0            | High-quality   | High-quality    | NA | 90.51 | 0     |
| SS_vs_k141_104289  full   | 49404  | No  | NA | 21   | 8            | High-quality   | High-quality    | NA | 100   | 0     |
| SS_vs_k141_136679  full   | 37872  | No  | NA | 8    | 0            | High-quality   | High-quality    | NA | 100   | 0     |
| SS_vs_k141_35522  full    | 5132   | No  | NA | 0    | 5            | Not-determined | Genome-fragment | NA | 100   | 0     |
| SS_vs_k141_120584  full   | 62832  | No  | NA | 29   | 1            | High-quality   | High-quality    | NA | 97.59 | 0     |
| SS_vs_k141_109085  full   | 36721  | No  | NA | 22   | 0            | High-quality   | High-quality    | NA | 97.45 | 0     |
| SS_vs_k141_121411  full   | 38687  | No  | NA | 16   | 7            | High-quality   | High-quality    | NA | 98.27 | 0     |
| SS_vs_k141_121419  full   | 37918  | No  | NA | 7    | 13           | High-quality   | High-quality    | NA | 100   | 0     |
| SS_vs_k141_27918  full    | 42263  | No  | NA | 0    | 0            | Not-determined | Genome-fragment | NA | 100   | 0     |
| SS_vs_k141_82785  full    | 2289   | No  | NA | 23   | 1            | High-quality   | High-quality    | NA | 94.18 | 0     |
| SS_vs_k141_145578  full   | 39974  | No  | NA | 23   | 0            | High-quality   | High-quality    | NA | 100   | 0     |
| SS_vs_k141_145581  full   | 38965  | No  | NA | 28   | 0            | High-quality   | High-quality    | NA | 100   | 0     |
| SS_vs_k141_145582  full   | 75891  | No  | NA | 28   | 0            | High-quality   | High-quality    | NA | 95.17 | 0     |
| SS_vs_k141_145590  full   | 39101  | No  | NA | 29   | 0            | High-quality   | High-quality    | NA | 95.38 | 0     |
| SS_vs_k141_145591  full   | 41441  | No  | NA | 14   | 0            | Medium-quality | Genome-fragment | NA | 99.49 | 0     |
| SS_vs_k141_145592  full   | 38088  | No  | NA | 2    | 0            | High-quality   | High-quality    | NA | 2.32  | 0     |
| SS_vs_k141_145593  full   | 14496  | No  | NA | 2    | 0            | High-quality   | High-quality    | NA | 94.87 | 0     |
| S1_extracted_k141_139383  | 1831   | No  | NA | 0    | 0            | Low-quality    | Genome-fragment | NA | 87.35 | 0     |
| SS_vs_k141_145597  full   | 32371  | No  | NA | 28   | 0            | Medium-quality | Genome-fragment | NA | 100   | 0     |
| SS_vs_k141_145598  full   | 40137  | No  | NA | 31   | 2            | High-quality   | High-quality    | NA | 100   | 0     |
| SS_vs_k141_145599  full   | 42481  | No  | NA | 31   | 2            | High-quality   | High-quality    | NA | 95.6  | 0     |
| SS_vs_k141_145601  full   | 11896  | No  | NA | 28   | 3            | High-quality   | High-quality    | NA | 64.18 | 0     |
| SS_vs_k141_145602  full   | 42207  | No  | NA | 28   | 5            | Medium-quality | Genome-fragment | NA | 92.74 | 0     |
| SS_vs_k141_145605  full   | 14670  | No  | NA | 26   | 0            | Low-quality    | Genome-fragment | NA | 1.8   | 0     |
| SS_vs_k141_145611  full   | 40032  | No  | NA | 1    | 0            | Not-determined | Genome-fragment | NA | 65.2  | 0     |
| SS_vs_k141_145621  full   | 2783   | No  | NA | 0    | 0            | Low-quality    | Genome-fragment | NA | 1.8   | 0     |
| S16_vs_132410  full       | 1831   | No  | NA | 0    | 1            | Medium-quality | Genome-fragment | NA | 100   | 0     |
| SS_vs_k141_133693  full   | 9779   | No  | NA | 1    | 0            | Not-determined | Genome-fragment | NA | 4.09  | 0     |
| SS_vs_k141_133699  full   | 1109   | No  | NA | 0    | 5            | Not-determined | Genome-fragment | NA | 1.3   | 0     |
| SS_vs_k141_36438  full    | 4957   | No  | NA | 1    | 0            | Low-quality    | Genome-fragment | NA | 4.28  | 0     |
| S8_vs_k141_196075  full   | 1831   | No  | NA | 1    | 0            | Low-quality    | Genome-fragment | NA | 3.64  | 0     |
| SS_vs_k141_97362  full    | 2164   | No  | NA | 0    | 1            | Not-determined | Genome-fragment | NA | 1.57  | 0     |
| S9_vs_k141_2504  full     | 1832   | No  | NA | 0    | 2            | Not-determined | Genome-fragment | NA | 2.99  | 0     |
| S3_vs_k141_66789  full    | 1832   | No  | NA | 0    | 0            | Low-quality    | Genome-fragment | NA | 3.1   | 0     |
| SS_vs_k141_6084  full     | 1520   | No  | NA | 0    | 0            | Low-quality    | Genome-fragment | NA | 4.28  | 0     |
| S7_extracted_44447        | 1832   | No  | NA | 0    | 0            | Low-quality    | Genome-fragment | NA | 1.64  | 0     |
| S7_vs_108304  full        | 1832   | No  | NA | 0    | 0            | Low-quality    | Genome-fragment | NA | 3.57  | 0     |
| SS_vs_k141_18251  full    | 2337   | No  | NA | 0    | 2            | Not-determined | Genome-fragment | NA | 0     | 0     |
| S16_extracted_33624       | 1832   | No  | NA | 0    | 1            | Not-determined | Genome-fragment | NA | 0     | 0     |
| S15_vs_74371  full        | 1832   | No  | NA | 3    | 0            | Low-quality    | Genome-fragment | NA | 0     | 0     |
| SS_vs_k141_691  full      | 2601   | No  | NA | 0    | 2            | Not-determined | Genome-fragment | NA | 0     | 0     |
| SS_vs_k141_51234  full    | 1421   | No  | NA | 0    | 1            | Not-determined | Genome-fragment | NA | 0     | 0     |
| SS_vs_k141_48611  full    | 1274   | No  | NA | 0    | 1            | Not-determined | Genome-fragment | NA | 0     | 0     |
| SS_vs_k141_60911  full    | 1102   | No  | NA | 0    | 0            | Not-determined | Genome-fragment | NA | 0     | 0     |
| S12_vs_k141_158146  full  | 1832   | No  | NA | 0    | 0            | Low-quality    | Genome-fragment | NA | 3.61  | 0     |
| S17_extracted_k141_83232  | 1833   | No  | NA | 2    | 0            | Low-quality    | Genome-fragment | NA | 6.04  | 0     |
| SS_vs_k141_109324  full   | 2004   | No  | NA | 0    | 1            | Not-determined | Genome-fragment | NA | 0     | 0     |
| SS_vs_k141_107998  full   | 6912   | No  | NA | 0    | 3            | Not-determined | Genome-fragment | NA | 0     | 0     |
| SS_vs_k141_11851  full    | 5351   | No  | NA | 0    | 2            | Not-determined | Genome-fragment | NA | 0     | 0     |
| SS_vs_k141_18299  full    | 1008   | No  | NA | 0    | 1            | Not-determined | Genome-fragment | NA | 0     | 0     |
| SS_vs_k141_127546  full   | 2947   | No  | NA | 0    | 2            | Not-determined | Genome-fragment | NA | 1.72  | 0     |
| S9_vs_k141_49612  full    | 1833   | No  | NA | 0    | 1            | Low-quality    | Genome-fragment | NA | 0     | 0     |
| SS_vs_k141_121532  full   | 3464   | No  | NA | 0    | 1            | Not-determined | Genome-fragment | NA | 2.99  | 0     |
| S11_extracted_k141_36497  | 1833   | No  | NA | 2    | 0            | Low-quality    | Genome-fragment | NA | 4.7   | 0     |
| S7_extracted_21832        | 1833   | No  | NA | 0    | 0            | Not-determined | Genome-fragment | NA | 0     | 0     |
| SS_vs_k141_127558  full   | 1009   | No  | NA | 0    | 0            | Not-determined | Genome-fragment | NA | 0     | 0     |
| SS_vs_k141_18322  full    | 4647   | No  | NA | 0    | 0            | Not-determined | Genome-fragment | NA | 0     | 0     |
| SS_vs_k141_103332  full   | 1045   | No  | NA | 0    | 0            | Low-quality    | Genome-fragment | NA | 3.79  | 0     |
| S16_vs_139334  full       | 1833   | No  | NA | 1    | 0            | Low-quality    | Genome-fragment | NA | 2.09  | 0     |
| S12_extracted_k141_107204 | 1833   | No  | NA | 0    | 0            | Low-quality    | Genome-fragment | NA | 0     | 0     |
| SS_vs_k141_139743  full   | 1396   | No  | NA | 0    | 1            | Not-determined |                 |    |       |       |



|                            |        |     |    |       |    |                   |                 |       |       |
|----------------------------|--------|-----|----|-------|----|-------------------|-----------------|-------|-------|
| 57_vs_107280  full         | 1835   | No  | NA | 1     | 0  | Low-quality       | Genome-fragment | 1.15  | 0     |
| 512_vs_k141_111311 full    | 1835   | No  | NA | 0     | 2  | Low-quality       | Genome-fragment | 4.79  | 0     |
| 512_vs_k141_161354 full    | 1835   | No  | NA | 1     | 0  | Low-quality       | Genome-fragment | 5.24  | 0     |
| 55_vs_k141_30490  full     | 56501  | Yes |    | 33176 | 4  | 14 Medium-quality | Genome-fragment | 86.22 | 41.28 |
| 58_vs_k141_3418  H2gene    | 1835   | No  | NA | 1     | 0  | Low-quality       | Genome-fragment | 4.54  | 0     |
| 514_extracted_k141_15592   | 1836   | No  | NA | 2     | 0  | Low-quality       | Genome-fragment | 5.14  | 0     |
| 55_vs_k141_103509  full    | 2338   | No  | NA | 0     | 0  | Not-determined    | Genome-fragment | NA    | 0     |
| 514_vs_k141_1158  full     | 1836   | No  | NA | 0     | 0  | Low-quality       | Genome-fragment | 1     | 0     |
| 514_vs_k141_84071  full    | 1836   | No  | NA | 0     | 0  | Low-quality       | Genome-fragment | 4.04  | 0     |
| 53_extracted_k141_20385    | 1836   | No  | NA | 1     | 0  | Low-quality       | Genome-fragment | 1.76  | 0     |
| 55_vs_k141_30184  H2gene   | 1836   | No  | NA | 0     | 0  | Low-quality       | Genome-fragment | 3.89  | 0     |
| 57_vs_37011 full           | 1836   | No  | NA | 0     | 1  | Low-quality       | Genome-fragment | 0.53  | 0     |
| 516_vs_131604 full         | 1836   | No  | NA | 0     | 1  | Low-quality       | Genome-fragment | 1.14  | 0     |
| 55_vs_k141_127662  H2gene  | 1837   | No  | NA | 2     | 0  | Low-quality       | Genome-fragment | 4.63  | 0     |
| 57_vs_92145  H2gene        | 1837   | No  | NA | 1     | 0  | Low-quality       | Genome-fragment | 4.46  | 0     |
| 55_vs_k141_61018  full     | 2450   | No  | NA | 0     | 1  | Not-determined    | Genome-fragment | NA    | 0     |
| 55_vs_k141_18510  full     | 1675   | No  | NA | 0     | 0  | Not-determined    | Genome-fragment | NA    | 0     |
| 516_vs_20293  full         | 1837   | No  | NA | 0     | 1  | Low-quality       | Genome-fragment | 4.12  | 0     |
| 510_vs_41112  full         | 1837   | No  | NA | 0     | 0  | Low-quality       | Genome-fragment | 4.25  | 0     |
| 55_vs_k141_103594 full     | 1033   | No  | NA | 0     | 1  | Not-determined    | Genome-fragment | NA    | 0     |
| 511_vs_k141_71913 full     | 1838   | No  | NA | 0     | 0  | Low-quality       | Genome-fragment | 4.3   | 0     |
| 51_vs_k141_19194 full      | 1838   | No  | NA | 0     | 0  | Low-quality       | Genome-fragment | 4.66  | 0     |
| 55_vs_k141_109484 full     | 1515   | No  | NA | 0     | 0  | Not-determined    | Genome-fragment | NA    | 0     |
| 55_vs_k141_115531 full     | 1045   | No  | NA | 0     | 0  | Not-determined    | Genome-fragment | NA    | 0     |
| 53_vs_k141_72462 full      | 1838   | No  | NA | 0     | 0  | Low-quality       | Genome-fragment | 5.53  | 0     |
| 53_vs_k141_74069 full      | 1838   | No  | NA | 1     | 0  | Low-quality       | Genome-fragment | 2.82  | 0     |
| 53_vs_k141_124055 full     | 1838   | No  | NA | 2     | 0  | Low-quality       | Genome-fragment | 5.11  | 0     |
| 55_vs_k141_103820 full     | 1838   | No  | NA | 2     | 0  | Low-quality       | Genome-fragment | 1.34  | 0     |
| 55_vs_k141_143298 full     | 1838   | No  | NA | 2     | 0  | Low-quality       | Genome-fragment | 1.78  | 0     |
| 55_vs_k141_138036 full     | 1838   | No  | NA | 1     | 0  | Low-quality       | Genome-fragment | 1.19  | 0     |
| 510_vs_18009 full          | 1838   | No  | NA | 0     | 1  | Low-quality       | Genome-fragment | 3.71  | 0     |
| 510_vs_60579 full          | 1838   | No  | NA | 1     | 1  | Low-quality       | Genome-fragment | 2.75  | 0     |
| 58_vs_k141_119346 full     | 1838   | No  | NA | 0     | 0  | Low-quality       | Genome-fragment | 4.3   | 0     |
| 513_vs_111363 full         | 1839   | No  | NA | 0     | 2  | Low-quality       | Genome-fragment | 0.84  | 0     |
| 53_extracted_k141_76777    | 1839   | No  | NA | 0     | 0  | Low-quality       | Genome-fragment | 1.26  | 0     |
| 57_vs_91588 full           | 1839   | No  | NA | 0     | 0  | Low-quality       | Genome-fragment | 5.4   | 0     |
| 517_vs_k141_115013 full    | 1840   | No  | NA | 0     | 0  | Low-quality       | Genome-fragment | 3.16  | 0     |
| 517_vs_k141_167464 full    | 1840   | No  | NA | 1     | 0  | Low-quality       | Genome-fragment | 2.41  | 0     |
| 55_vs_k141_127770 full     | 1521   | No  | NA | 0     | 0  | Not-determined    | Genome-fragment | NA    | 0     |
| 59_vs_k141_75502 full      | 1840   | No  | NA | 0     | 2  | Low-quality       | Genome-fragment | 3.22  | 0     |
| 55_vs_k141_6478 full       | 41423  | No  | NA | 21    | 0  | High-quality      | High-quality    | 98    | 0     |
| 55_vs_k141_61077 full      | 2461   | No  | NA | 0     | 0  | Not-determined    | Genome-fragment | NA    | 0     |
| 55_vs_k141_36630 full      | 5093   | No  | NA | 0     | 4  | Not-determined    | Genome-fragment | NA    | 0     |
| 511_vs_k141_80053 full     | 1840   | No  | NA | 2     | 0  | Low-quality       | Genome-fragment | 3.37  | 0     |
| 511_vs_k141_45063 full     | 1840   | No  | NA | 0     | 0  | Low-quality       | Genome-fragment | 1.79  | 0     |
| 513_extracted_41788        | 1840   | No  | NA | 0     | 1  | Low-quality       | Genome-fragment | 2.91  | 0     |
| 55_vs_k141_66996 full      | 1636   | No  | NA | 0     | 2  | Not-determined    | Genome-fragment | NA    | 0     |
| 55_vs_k141_399 full        | 3739   | No  | NA | 0     | 0  | Not-determined    | Genome-fragment | NA    | 0     |
| 514_vs_k141_6013 full      | 1840   | No  | NA | 0     | 0  | Low-quality       | Genome-fragment | 4.04  | 0     |
| 53_vs_k141_88526 full      | 1840   | No  | NA | 0     | 1  | Low-quality       | Genome-fragment | 2.86  | 0     |
| 53_vs_k141_41075 full      | 1840   | No  | NA | 0     | 1  | Low-quality       | Genome-fragment | 1.66  | 0     |
| 55_vs_k141_20610 full      | 1600   | No  | NA | 0     | 0  | Not-determined    | Genome-fragment | NA    | 0     |
| 55_vs_k141_454 full        | 1157   | No  | NA | 0     | 1  | Not-determined    | Genome-fragment | NA    | 0     |
| 55_vs_k141_63218 full      | 1840   | No  | NA | 0     | 1  | Low-quality       | Genome-fragment | 2.25  | 0     |
| 55_vs_k141_12127 full      | 1417   | No  | NA | 0     | 0  | Not-determined    | Genome-fragment | NA    | 0     |
| 57_extracted_16137         | 1840   | No  | NA | 0     | 2  | Low-quality       | Genome-fragment | 1.55  | 0     |
| 55_vs_k141_115659 full     | 6211   | No  | NA | 0     | 3  | Not-determined    | Genome-fragment | NA    | 0     |
| 55_vs_k141_48876 full      | 1157   | No  | NA | 0     | 0  | Not-determined    | Genome-fragment | NA    | 0     |
| 516_extracted_16648        | 1840   | No  | NA | 0     | 0  | Low-quality       | Genome-fragment | 3.32  | 0     |
| 55_vs_k141_73119 full      | 4649   | No  | NA | 0     | 3  | Not-determined    | Genome-fragment | NA    | 0     |
| 55_vs_k141_30666 full      | 7450   | No  | NA | 0     | 2  | Not-determined    | Genome-fragment | NA    | 0     |
| 517_vs_k141_24648 full     | 1841   | No  | NA | 0     | 0  | Low-quality       | Genome-fragment | 4.13  | 0     |
| 55_vs_k141_85360 full      | 1038   | No  | NA | 0     | 0  | Not-determined    | Genome-fragment | NA    | 0     |
| 55_vs_k141_103764 full     | 16178  | No  | NA | 0     | 9  | Not-determined    | Genome-fragment | NA    | 0     |
| 59_extracted_k141_48938    | 1841   | No  | NA | 1     | 0  | Low-quality       | Genome-fragment | 2.69  | 0     |
| 513_vs_114837  H2gene      | 1841   | No  | NA | 0     | 1  | Low-quality       | Genome-fragment | 0.52  | 0     |
| 55_vs_k141_36671 full      | 2043   | No  | NA | 0     | 0  | Not-determined    | Genome-fragment | NA    | 0     |
| 51_extracted_k141_35843    | 1841   | No  | NA | 0     | 0  | Low-quality       | Genome-fragment | 1.87  | 0     |
| 55_vs_k141_48919 full      | 1406   | No  | NA | 0     | 0  | Not-determined    | Genome-fragment | NA    | 0     |
| 57_extracted_107029        | 1841   | No  | NA | 0     | 0  | Low-quality       | Genome-fragment | 0.8   | 0     |
| 516_vs_115763 full         | 1841   | No  | NA | 1     | 0  | Low-quality       | Genome-fragment | 4.71  | 0     |
| 55_vs_k141_48943 full      | 1142   | No  | NA | 0     | 0  | Not-determined    | Genome-fragment | NA    | 0     |
| 513_extracted_38635        | 1842   | No  | NA | 0     | 1  | Low-quality       | Genome-fragment | 0.93  | 0     |
| 55_vs_k141_79159 full      | 1587   | No  | NA | 0     | 1  | Not-determined    | Genome-fragment | NA    | 0     |
| 514_extracted_k141_47011   | 1842   | No  | NA | 0     | 2  | Low-quality       | Genome-fragment | 5.98  | 0     |
| 55_vs_k141_109527 full     | 142384 | No  | NA | 2     | 28 | Medium-quality    | Genome-fragment | 76.5  | 0     |
| 514_vs_k141_87103 full     | 1842   | No  | NA | 1     | 0  | Low-quality       | Genome-fragment | 1.1   | 0     |
| 57_vs_114399 full          | 1842   | No  | NA | 0     | 0  | Low-quality       | Genome-fragment | 4.96  | 0     |
| 516_vs_134556 full         | 1842   | No  | NA | 0     | 0  | Low-quality       | Genome-fragment | 5.14  | 0     |
| 516_vs_147705 full         | 1842   | No  | NA | 1     | 0  | Low-quality       | Genome-fragment | 2.09  | 0     |
| 510_vs_15161 full          | 1842   | No  | NA | 2     | 0  | Low-quality       | Genome-fragment | 5.28  | 0     |
| 515_extracted_20535        | 1842   | No  | NA | 2     | 0  | Low-quality       | Genome-fragment | 2.35  | 0     |
| 58_vs_k141_123360 full     | 1842   | No  | NA | 0     | 0  | Low-quality       | Genome-fragment | 4.35  | 0     |
| 514_extracted_k141_37400   | 1843   | No  | NA | 0     | 2  | Low-quality       | Genome-fragment | 4.03  | 0     |
| 514_extracted_k141_2759    | 1843   | No  | NA | 1     | 0  | Low-quality       | Genome-fragment | 4.34  | 0     |
| 514_vs_k141_108421 full    | 1843   | No  | NA | 0     | 0  | Low-quality       | Genome-fragment | 4.92  | 0     |
| 55_vs_k141_61174 full      | 2818   | No  | NA | 0     | 1  | Not-determined    | Genome-fragment | NA    | 0     |
| 55_vs_k141_57483 full      | 1924   | No  | NA | 0     | 1  | Not-determined    | Genome-fragment | NA    | 0     |
| 53_vs_k141_101558 full     | 1843   | No  | NA | 0     | 1  | Low-quality       | Genome-fragment | 0.81  | 0     |
| 55_vs_k141_73137 full      | 1840   | No  | NA | 0     | 2  | Not-determined    | Genome-fragment | NA    | 0     |
| 510_extracted_109721       | 1843   | No  | NA | 0     | 0  | Low-quality       | Genome-fragment | 2.8   | 0     |
| 55_vs_k141_6511 full       | 4580   | No  | NA | 0     | 2  | Not-determined    | Genome-fragment | NA    | 0     |
| 55_vs_k141_6582 full       | 1988   | No  | NA | 0     | 1  | Not-determined    | Genome-fragment | NA    | 0     |
| 510_vs_109134 full         | 1843   | No  | NA | 0     | 1  | Low-quality       | Genome-fragment | 2.41  | 0     |
| 55_vs_k141_97522 full      | 2176   | No  | NA | 0     | 0  | Not-determined    | Genome-fragment | NA    | 0     |
| 55_vs_k141_49011 full      | 33303  | No  | NA | 20    | 0  | High-quality      | High-quality    | 95.31 | 0     |
| 55_vs_k141_18599 full      | 4665   | No  | NA | 0     | 2  | Not-determined    | Genome-fragment | NA    | 0     |
| 512_extracted_k141_116660  | 1843   | No  | NA | 0     | 0  | Low-quality       | Genome-fragment | 5.16  | 0     |
| 515_vs_11840 full          | 1843   | No  | NA | 0     | 0  | Low-quality       | Genome-fragment | 1.11  | 0     |
| 55_vs_k141_30842 full      | 2770   | No  | NA | 0     | 2  | Not-determined    | Genome-fragment | NA    | 0     |
| 58_extracted_k141_31115    | 1843   | No  | NA | 1     | 0  | Low-quality       | Genome-fragment | 11.85 | 0     |
| 58_vs_k141_61554 full      | 1841   | No  | NA | 0     | 0  | Low-quality       | Genome-fragment | 4.43  | 0     |
| 517_vs_k141_106862 full    | 1844   | No  | NA | 0     | 0  | Low-quality       | Genome-fragment | 5.15  | 0     |
| 511_vs_k141_97641 full     | 1844   | No  | NA | 0     | 0  | Low-quality       | Genome-fragment | 4.55  | 0     |
| 51_extracted_k141_42622    | 1844   | No  | NA | 0     | 0  | Low-quality       | Genome-fragment | 1.03  | 0     |
| 55_vs_k141_30886 full      | 1006   | No  | NA | 0     | 0  | Not-determined    | Genome-fragment | NA    | 0     |
| 51_extracted_k141_70256    | 1844   | No  | NA | 0     | 0  | Low-quality       | Genome-fragment | 4.16  | 0     |
| 55_vs_k141_7891 full       | 2982   | No  | NA | 0     | 2  | Not-determined    | Genome-fragment | NA    | 0     |
| 55_vs_k141_43207 full      | 37982  | No  | NA | 15    | 0  | High-quality      | High-quality    | 92.44 | 0     |
| 55_vs_k141_85432 full      | 12722  | No  | NA | 0     | 0  | Not-determined    | Genome-fragment | NA    | 0     |
| 55_vs_k141_36720 full      | 1064   | No  | NA | 0     | 1  | Not-determined    | Genome-fragment | NA    | 0     |
| 55_vs_k141_85442 full      | 1171   | No  | NA | 0     | 0  | Not-determined    | Genome-fragment | NA    | 0     |
| 55_vs_k141_30918 full      | 2323   | No  | NA | 0     | 1  | Not-determined    | Genome-fragment | NA    | 0     |
| 55_vs_k141_140400 full     | 2256   | No  | NA | 0     | 2  | Not-determined    | Genome-fragment | NA    | 0     |
| 51_vs_k141_50391 full      | 1844   | No  | NA | 0     | 0  | Low-quality       | Genome-fragment | 2.18  | 0     |
| 53_extracted_k141_114111   | 1844   | No  | NA | 0     | 0  | Low-quality       | Genome-fragment | 4.63  | 0     |
| 55_extracted_k141_86473    | 1844   | No  | NA | 1     | 1  | Low-quality       | Genome-fragment | 2.9   | 0     |
| 55_vs_k141_127979 full     | 1309   | No  | NA | 0     | 0  | Not-determined    | Genome-fragment | NA    | 0     |
| 55_vs_k141_136684 full     | 1844   | No  | NA | 0     | 0  | Low-quality       | Genome-fragment | 3.03  | 0     |
| 516_vs_26169 full          | 1844   | No  | NA | 0     | 0  | Low-quality       | Genome-fragment | 3.59  | 0     |
| 55_vs_k141_49077 full      | 1844   | No  | NA | 1     | 0  | Low-quality       | Genome-fragment | 4.25  | 0     |
| 55_vs_k141_833 full        | 1832   | No  | NA | 0     | 0  | Not-determined    | Genome-fragment | NA    | 0     |
| 510_vs_101146 full         | 2111   | No  | NA | 0     | 0  | Not-determined    | Genome-fragment | NA    | 0     |
| 58_vs_k141_74758 full      | 1844   | No  | NA | 0     | 2  | Low-quality       | Genome-fragment | 2.28  | 0     |
| 59_extracted_k141_4275     | 1844   | No  | NA | 0     | 0  | Low-quality       | Genome-fragment | 3.84  | 0     |
| 57_vs_k141_83838 full      | 1845   | No  | NA | 0     | 1  | Low-quality       | Genome-fragment | 1.01  | 0     |
| 57_vs_18159 full           | 1845   | No  | NA | 0     | 0  | Low-quality       | Genome-fragment | 3.25  | 0     |
| 55_vs_k141_12417 full      | 3176   | No  | NA | 0     | 0  | Not-determined    | Genome-fragment | NA    | 0     |
| 55_vs_k141_848 full        | 6135   | No  | NA | 0     | 4  | Not-determined    | Genome-fragment | NA    | 0     |
| 57_vs_36906 full           | 1845   | No  | NA | 1     | 0  | Low-quality       | Genome-fragment | 3.15  | 0     |
| 516_extracted_45418        | 1845   | No  | NA | 0     | 0  | Low-quality       | Genome-fragment | 3.08  | 0     |
| 55_vs_k141_18703 full      | 5840   | No  | NA | 0     | 0  | Not-determined    | Genome-fragment | NA    | 0     |
| 516_vs_124965  H2gene      | 1845   | No  | NA | 1     | 0  | Low-quality       | Genome-fragment | 4.47  | 0     |
| 55_vs_k141_71719 full      | 1849   | No  | NA | 0     | 0  | Not-determined    | Genome-fragment | NA    | 0     |
| 55_vs_k141_122317 full     | 1927   | No  | NA | 0     | 0  | Not-determined    | Genome-fragment | NA    | 0     |
| 512_vs_k141_176295  H2gene | 1845   | No  | NA | 1     | 0  | Low-quality       | Genome-fragment | 3.19  | 0     |
| 58_vs_k141_178377 full     | 1845   | No  | NA | 0     | 1  | Low-quality       | Genome-fragment | 5.34  | 0     |
| 58_vs_k141_134855 full     | 1845   | No  | NA | 0     | 0  | Low-quality       | Genome-fragment | 4.66  | 0     |
| 55_vs_k141_8501 full       | 44156  | No  | NA | 20    | 1  | High-quality      | High-quality    | 96.5  | 0     |
| 55_vs_k141_107928 full     | 1846   | No  | NA | 3     | 0  | Low-quality       | Genome-fragment | 4.62  | 0     |
| 55_vs_k141_36863 full      | 1175   | No  | NA | 0     | 1  | Not-determined    | Genome-fragment | NA    | 0     |
| 57_vs_89294  H2gene        | 1846   | No  | NA | 1     | 0  | Low-quality       | Genome-fragment | 1.14  | 0     |
| 55_vs_k141_6               |        |     |    |       |    |                   |                 |       |       |



|                            |       |    |    |    |   |                |                 |       |   |
|----------------------------|-------|----|----|----|---|----------------|-----------------|-------|---|
| S11_vs_k141_17601  H2gene  | 1849  | No | NA | 2  | 0 | Low-quality    | Genome-fragment | 4.66  | 0 |
| S5_vs_k141_55559  full     | 1629  | No | NA | 0  | 2 | Not-determined | Genome-fragment | NA    | 0 |
| S13_vs_115836  full        | 1849  | No | NA | 0  | 0 | Low-quality    | Genome-fragment | 4.35  | 0 |
| S5_vs_k141_1027  full      | 3034  | No | NA | 0  | 3 | Not-determined | Genome-fragment | NA    | 0 |
| S5_vs_k141_133971  full    | 1897  | No | NA | 0  | 0 | Not-determined | Genome-fragment | NA    | 0 |
| S5_vs_k141_13448  full     | 2384  | No | NA | 0  | 2 | Not-determined | Genome-fragment | NA    | 0 |
| S14_vs_k141_1996  full     | 1849  | No | NA | 0  | 1 | Low-quality    | Genome-fragment | 4.29  | 0 |
| S5_vs_k141_116139  full    | 2275  | No | NA | 0  | 3 | Not-determined | Genome-fragment | NA    | 0 |
| S12_extracted_k141_60501   | 1849  | No | NA | 0  | 0 | Low-quality    | Genome-fragment | 5.45  | 0 |
| S7_extracted_129708        | 1850  | No | NA | 0  | 1 | Low-quality    | Genome-fragment | 0.82  | 0 |
| S16_vs_28088  full         | 1850  | No | NA | 0  | 2 | Low-quality    | Genome-fragment | 0.48  | 0 |
| S10_vs_78840  full         | 1850  | No | NA | 0  | 1 | Low-quality    | Genome-fragment | 2.35  | 0 |
| S5_vs_k141_1118  full      | 1655  | No | NA | 0  | 3 | Not-determined | Genome-fragment | NA    | 0 |
| S17_vs_k141_53760  full    | 1851  | No | NA | 0  | 1 | Low-quality    | Genome-fragment | 1.21  | 0 |
| S9_extracted_k141_80566    | 1851  | No | NA | 2  | 0 | Low-quality    | Genome-fragment | 4.41  | 0 |
| S14_extracted_k141_60879   | 1851  | No | NA | 0  | 0 | Not-determined | Genome-fragment | 3.98  | 0 |
| S5_vs_k141_116132  full    | 7564  | No | NA | 0  | 1 | Not-determined | Genome-fragment | NA    | 0 |
| S5_vs_k141_18893  full     | 1293  | No | NA | 0  | 1 | Not-determined | Genome-fragment | NA    | 0 |
| S14_vs_k141_94007  full    | 1851  | No | NA | 0  | 0 | Low-quality    | Genome-fragment | 1.45  | 0 |
| S3_extracted_k141_39224    | 1851  | No | NA | 0  | 0 | Low-quality    | Genome-fragment | 2.78  | 0 |
| S3_vs_k141_49438  full     | 1851  | No | NA | 0  | 2 | Low-quality    | Genome-fragment | 1.64  | 0 |
| S5_vs_k141_140148  full    | 1477  | No | NA | 0  | 1 | Not-determined | Genome-fragment | NA    | 0 |
| S7_vs_67978  full          | 1851  | No | NA | 0  | 1 | Low-quality    | Genome-fragment | 2.19  | 0 |
| S15_vs_70325  full         | 1851  | No | NA | 0  | 0 | Low-quality    | Genome-fragment | 3.06  | 0 |
| S5_vs_k141_67322  full     | 1181  | No | NA | 0  | 1 | Not-determined | Genome-fragment | NA    | 0 |
| S5_vs_k141_140167  full    | 1839  | No | NA | 0  | 2 | Not-determined | Genome-fragment | NA    | 0 |
| S6_vs_k141_6731  H2gene    | 1851  | No | NA | 2  | 0 | Low-quality    | Genome-fragment | 4.79  | 0 |
| S5_vs_k141_1192  full      | 1114  | No | NA | 0  | 2 | Not-determined | Genome-fragment | NA    | 0 |
| S1_vs_k141_65303  full     | 1852  | No | NA | 0  | 0 | Low-quality    | Genome-fragment | 4.7   | 0 |
| S5_vs_k141_77926  full     | 1852  | No | NA | 0  | 0 | Low-quality    | Genome-fragment | 4.51  | 0 |
| S5_vs_k141_1221  full      | 4249  | No | NA | 0  | 3 | Not-determined | Genome-fragment | NA    | 0 |
| S12_extracted_k141_87344   | 1852  | No | NA | 0  | 0 | Low-quality    | Genome-fragment | 4.06  | 0 |
| S5_vs_k141_122607  full    | 2211  | No | NA | 0  | 2 | Not-determined | Genome-fragment | NA    | 0 |
| S8_vs_k141_173818  full    | 1852  | No | NA | 1  | 0 | Low-quality    | Genome-fragment | 3.37  | 0 |
| S8_vs_k141_150338  full    | 1852  | No | NA | 2  | 0 | Low-quality    | Genome-fragment | 3.75  | 0 |
| S11_vs_k141_77390  H2gene  | 1853  | No | NA | 0  | 0 | Low-quality    | Genome-fragment | 4.31  | 0 |
| S13_vs_86129  full         | 1853  | No | NA | 1  | 0 | Low-quality    | Genome-fragment | 0.86  | 0 |
| S7_vs_118031  full         | 1853  | No | NA | 1  | 0 | Low-quality    | Genome-fragment | 1.92  | 0 |
| S8_extracted_k141_193140   | 1853  | No | NA | 0  | 1 | Low-quality    | Genome-fragment | NA    | 0 |
| S8_extracted_k141_81521    | 1853  | No | NA | 0  | 0 | Low-quality    | Genome-fragment | 2.87  | 0 |
| S5_vs_k141_79300  full     | 4391  | No | NA | 0  | 3 | Not-determined | Genome-fragment | NA    | 0 |
| S8_extracted_k141_57658    | 1853  | No | NA | 0  | 1 | Low-quality    | Genome-fragment | 5.23  | 0 |
| S5_vs_k141_104048  full    | 1916  | No | NA | 0  | 3 | Not-determined | Genome-fragment | NA    | 0 |
| S17_vs_k141_111781  full   | 1854  | No | NA | 0  | 0 | Low-quality    | Genome-fragment | 3.87  | 0 |
| S17_vs_k141_10985  full    | 1854  | No | NA | 2  | 0 | Low-quality    | Genome-fragment | 4.72  | 0 |
| S5_vs_k141_116235  full    | 37669 | No | NA | 19 | 3 | High-quality   | High-quality    | 98.06 | 0 |
| S9_vs_k141_55023  full     | 1854  | No | NA | 1  | 0 | Low-quality    | Genome-fragment | 1.03  | 0 |
| S9_vs_k141_47885  full     | 1854  | No | NA | 0  | 0 | Low-quality    | Genome-fragment | 2.29  | 0 |
| S5_vs_k141_21370  full     | 3021  | No | NA | 0  | 3 | Not-determined | Genome-fragment | NA    | 0 |
| S11_vs_k141_16986  full    | 1854  | No | NA | 1  | 0 | Low-quality    | Genome-fragment | 4.82  | 0 |
| S5_vs_k141_6999  full      | 4347  | No | NA | 0  | 1 | Not-determined | Genome-fragment | NA    | 0 |
| S1_extracted_k141_95241    | 1854  | No | NA | 0  | 1 | Low-quality    | Genome-fragment | 1.28  | 0 |
| S5_vs_k141_19014  full     | 8474  | No | NA | 0  | 6 | Not-determined | Genome-fragment | NA    | 0 |
| S5_vs_k141_134108  full    | 3946  | No | NA | 0  | 2 | Not-determined | Genome-fragment | NA    | 0 |
| S5_vs_k141_21854  full     | 2806  | No | NA | 0  | 1 | Not-determined | Genome-fragment | NA    | 0 |
| S1_extracted_k141_130182   | 1854  | No | NA | 0  | 0 | Low-quality    | Genome-fragment | 3.51  | 0 |
| S5_vs_k141_1338  full      | 56857 | No | NA | 8  | 4 | Medium-quality | Genome-fragment | 51.1  | 0 |
| S1_vs_k141_12979  full     | 1854  | No | NA | 0  | 2 | Low-quality    | Genome-fragment | 0.94  | 0 |
| S5_vs_k141_19069  full     | 1057  | No | NA | 0  | 1 | Not-determined | Genome-fragment | NA    | 0 |
| S1_vs_k141_86712  full     | 1854  | No | NA | 0  | 2 | Low-quality    | Genome-fragment | 0.77  | 0 |
| S5_vs_k141_128281  full    | 1233  | No | NA | 0  | 0 | Not-determined | Genome-fragment | NA    | 0 |
| S5_vs_k141_17271  full     | 5580  | No | NA | 0  | 0 | Not-determined | Genome-fragment | NA    | 0 |
| S3_vs_k141_24518  full     | 1854  | No | NA | 2  | 0 | Low-quality    | Genome-fragment | 3.85  | 0 |
| S5_extracted_k141_8110     | 1854  | No | NA | 0  | 0 | Low-quality    | Genome-fragment | 2.57  | 0 |
| S5_vs_k141_14775  full     | 1854  | No | NA | 0  | 2 | Low-quality    | Genome-fragment | 3.89  | 0 |
| S5_vs_k141_97601  full     | 1901  | No | NA | 0  | 0 | Not-determined | Genome-fragment | NA    | 0 |
| S7_vs_81322  full          | 1854  | No | NA | 1  | 0 | Low-quality    | Genome-fragment | 4.42  | 0 |
| S5_vs_k141_122793  full    | 2893  | No | NA | 0  | 0 | Not-determined | Genome-fragment | NA    | 0 |
| S7_vs_101606  full         | 1854  | No | NA | 0  | 0 | Low-quality    | Genome-fragment | 5.09  | 0 |
| S5_vs_k141_7091  full      | 2807  | No | NA | 0  | 2 | Not-determined | Genome-fragment | NA    | 0 |
| S5_vs_k141_104159  full    | 1465  | No | NA | 0  | 0 | Not-determined | Genome-fragment | NA    | 0 |
| S5_vs_k141_116331  full    | 2798  | No | NA | 0  | 1 | Not-determined | Genome-fragment | NA    | 0 |
| S16_vs_25173  full         | 1854  | No | NA | 0  | 0 | Low-quality    | Genome-fragment | 3.2   | 0 |
| S6_vs_k141_12862  full     | 1854  | No | NA | 1  | 0 | Low-quality    | Genome-fragment | 1.06  | 0 |
| S5_vs_k141_104172  full    | 1754  | No | NA | 0  | 1 | Not-determined | Genome-fragment | NA    | 0 |
| S17_vs_k141_159358  H2gene | 1855  | No | NA | 2  | 0 | Low-quality    | Genome-fragment | 4.52  | 0 |
| S7_extracted_80695         | 1855  | No | NA | 0  | 0 | Low-quality    | Genome-fragment | 1.28  | 0 |
| S7_vs_6077  full           | 1855  | No | NA | 2  | 0 | Low-quality    | Genome-fragment | 3.62  | 0 |
| S8_vs_k141_171024  H2gene  | 1855  | No | NA | 0  | 0 | Low-quality    | Genome-fragment | 4.61  | 0 |
| S5_vs_k141_55253  full     | 2976  | No | NA | 0  | 0 | Not-determined | Genome-fragment | NA    | 0 |
| S5_vs_k141_134197  full    | 1050  | No | NA | 0  | 0 | Not-determined | Genome-fragment | NA    | 0 |
| S5_vs_k141_65817  full     | 3507  | No | NA | 0  | 2 | Not-determined | Genome-fragment | NA    | 0 |
| S5_vs_k141_97632  full     | 1169  | No | NA | 0  | 0 | Not-determined | Genome-fragment | NA    | 0 |
| S5_vs_k141_11498  full     | 1012  | No | NA | 0  | 1 | Not-determined | Genome-fragment | NA    | 0 |
| S5_vs_k141_61305  full     | 3360  | No | NA | 0  | 0 | Not-determined | Genome-fragment | NA    | 0 |
| S5_vs_k141_116411  full    | 2668  | No | NA | 0  | 1 | Not-determined | Genome-fragment | NA    | 0 |
| S17_vs_k141_89937  full    | 1856  | No | NA | 0  | 0 | Low-quality    | Genome-fragment | 3.62  | 0 |
| S14_extracted_k141_62071   | 1856  | No | NA | 3  | 0 | Low-quality    | Genome-fragment | 6.12  | 0 |
| S7_vs_6978  full           | 1856  | No | NA | 0  | 0 | Low-quality    | Genome-fragment | 4.5   | 0 |
| S7_vs_105288  full         | 1856  | No | NA | 0  | 1 | Low-quality    | Genome-fragment | 2.96  | 0 |
| S5_vs_k141_109944  full    | 2643  | No | NA | 0  | 3 | Not-determined | Genome-fragment | NA    | 0 |
| S5_vs_k141_122698  full    | 2461  | No | NA | 0  | 1 | Not-determined | Genome-fragment | NA    | 0 |
| S5_vs_k141_67574  full     | 1017  | No | NA | 0  | 0 | Not-determined | Genome-fragment | NA    | 0 |
| S16_vs_153824  full        | 1856  | No | NA | 0  | 0 | Low-quality    | Genome-fragment | 2.29  | 0 |
| S5_vs_k141_109997  full    | 1085  | No | NA | 0  | 1 | Not-determined | Genome-fragment | NA    | 0 |
| S12_extracted_k141_180691  | 1856  | No | NA | 0  | 0 | Low-quality    | Genome-fragment | 2.97  | 0 |
| S4_extracted_19554         | 1856  | No | NA | 1  | 0 | Low-quality    | Genome-fragment | 5.18  | 0 |
| S5_vs_k141_134217  full    | 1282  | No | NA | 0  | 2 | Not-determined | Genome-fragment | NA    | 0 |
| S5_vs_k141_140330  full    | 6316  | No | NA | 0  | 0 | Not-determined | Genome-fragment | NA    | 0 |
| S3_extracted_k141_315045   | 1857  | No | NA | 3  | 0 | Low-quality    | Genome-fragment | 6.12  | 0 |
| S5_extracted_k141_106276   | 1857  | No | NA | 1  | 0 | Low-quality    | Genome-fragment | 0.98  | 0 |
| S16_vs_101029  full        | 1857  | No | NA | 0  | 1 | Low-quality    | Genome-fragment | 1.71  | 0 |
| S10_vs_102982  full        | 1857  | No | NA | 0  | 0 | Low-quality    | Genome-fragment | 3.76  | 0 |
| S5_vs_k141_49480  full     | 30873 | No | NA | 21 | 1 | High-quality   | High-quality    | 92.04 | 0 |
| S5_vs_k141_104195  full    | 2085  | No | NA | 0  | 1 | Not-determined | Genome-fragment | NA    | 0 |
| S5_vs_k141_85892  full     | 1781  | No | NA | 0  | 1 | Not-determined | Genome-fragment | NA    | 0 |
| S5_vs_k141_85893  full     | 1004  | No | NA | 0  | 2 | Not-determined | Genome-fragment | NA    | 0 |
| S5_vs_k141_7239  full      | 1918  | No | NA | 0  | 1 | Not-determined | Genome-fragment | NA    | 0 |
| S12_extracted_k141_8289    | 1857  | No | NA | 0  | 0 | Low-quality    | Genome-fragment | 3.71  | 0 |
| S6_vs_k141_37151  full     | 1857  | No | NA | 0  | 0 | Low-quality    | Genome-fragment | 1.85  | 0 |
| S5_vs_k141_140370  full    | 2308  | No | NA | 0  | 0 | Not-determined | Genome-fragment | NA    | 0 |
| S5_vs_k141_65934  full     | 2299  | No | NA | 0  | 0 | Not-determined | Genome-fragment | NA    | 0 |
| S8_vs_k141_86750  full     | 1857  | No | NA | 0  | 1 | Low-quality    | Genome-fragment | 3.81  | 0 |
| S5_vs_k141_11595  full     | 1948  | No | NA | 0  | 1 | Not-determined | Genome-fragment | NA    | 0 |
| S11_vs_k141_69875  full    | 1858  | No | NA | 0  | 1 | Low-quality    | Genome-fragment | 2.99  | 0 |
| S5_vs_k141_31598  full     | 1233  | No | NA | 0  | 0 | Not-determined | Genome-fragment | NA    | 0 |
| S5_vs_k141_12914  full     | 1171  | No | NA | 0  | 0 | Not-determined | Genome-fragment | NA    | 0 |
| S3_extracted_k141_26555    | 1858  | No | NA | 0  | 2 | Low-quality    | Genome-fragment | 1.38  | 0 |
| S5_vs_k141_17309  full     | 1470  | No | NA | 0  | 0 | Not-determined | Genome-fragment | NA    | 0 |
| S5_vs_k141_85988  full     | 2064  | No | NA | 0  | 1 | Not-determined | Genome-fragment | NA    | 0 |
| S5_vs_k141_13909  full     | 4602  | No | NA | 0  | 6 | Not-determined | Genome-fragment | NA    | 0 |
| S5_vs_k141_42600  H2gene   | 1858  | No | NA | 0  | 1 | Low-quality    | Genome-fragment | 4.08  | 0 |
| S7_extracted_35682         | 1858  | No | NA | 0  | 0 | Low-quality    | Genome-fragment | 4.7   | 0 |
| S7_vs_133051  full         | 1858  | No | NA | 1  | 0 | Low-quality    | Genome-fragment | 3.1   | 0 |
| S16_extracted_159780       | 1858  | No | NA | 0  | 0 | Low-quality    | Genome-fragment | 1.2   | 0 |
| S12_vs_k141_159711  full   | 1858  | No | NA | 0  | 0 | Low-quality    | Genome-fragment | 4.19  | 0 |
| S8_vs_k141_7629  full      | 1858  | No | NA | 0  | 0 | Low-quality    | Genome-fragment | 2.01  | 0 |
| S17_vs_k141_45107  full    | 1859  | No | NA | 0  | 0 | Low-quality    | Genome-fragment | 3.08  | 0 |
| S5_vs_k141_19341  full     | 1147  | No | NA | 0  | 0 | Not-determined | Genome-fragment | NA    | 0 |
| S5_vs_k141_86014  full     | 3416  | No | NA | 0  | 4 | Not-determined | Genome-fragment | NA    | 0 |
| S5_vs_k141_13634  full     | 3780  | No | NA | 0  | 1 | Not-determined | Genome-fragment | NA    | 0 |
| S11_vs_k141_78005  H2gene  | 1859  | No | NA | 1  | 0 | Low-quality    | Genome-fragment | 4.58  | 0 |
| S5_vs_k141_24795  full     | 2001  | No | NA | 0  | 2 | Not-determined | Genome-fragment | NA    | 0 |
| S5_vs_k141_61564  full     | 6495  | No | NA | 0  | 3 | Not-determined | Genome-fragment | NA    | 0 |
| S13_vs_73394  full         | 1859  | No | NA | 0  | 0 | Low-quality    | Genome-fragment | 4.21  | 0 |
| S5_vs_k141_140519  full    | 1514  | No | NA | 0  | 1 | Not-determined | Genome-fragment | NA    | 0 |
| S10_vs_42011  H2gene       | 1859  | No | NA | 1  | 0 | Low-quality    | Genome-fragment | 5.91  | 0 |
| S12_vs_k141_142707  full   | 1859  | No | NA | 0  | 0 | Low-quality    | Genome-fragment | 2.07  | 0 |
| S11_vs_k141_41393  full    | 1860  | No | NA | 0  | 1 | Low-quality    | Genome-fragment | 0.87  | 0 |
| S13_extracted_350831       | 1860  | No | NA | 0  | 1 | Low-quality    | Genome-fragment | 2.02  | 0 |
| S14_vs_k141_87049  full    | 1860  | No | NA | 2  | 0 | Low-quality    | Genome-fragment | 4.12  | 0 |
| S5_vs_k141_74868  full     | 1843  | No | NA | 0  | 2 | Not-determined | Genome-fragment | NA    | 0 |
| S3_vs_k141_92538  full     | 1860  | No | NA | 1  | 0 | Low-quality    | Genome-fragment | 3.23  | 0 |
| S3_vs_k141_117786  H2gene  | 1860  | No | NA | 2  | 0 | Low-quality    | Genome-fragment | 5.22  |   |



|                           |          |       |     |       |    |    |                |                 |    |       |       |
|---------------------------|----------|-------|-----|-------|----|----|----------------|-----------------|----|-------|-------|
| SS_vs_k141_128347         | [full]   | 2243  | No  | NA    | 0  | 2  | Not-determined | Genome-fragment | NA | 0     | 0     |
| SS_vs_k141_134421         | [full]   | 1451  | No  | NA    | 1  | 3  | Not-determined | Genome-fragment | NA | 4.79  | 0     |
| SS_vs_k141_39723          | [full]   | 1862  | No  | NA    | 0  | 1  | Low-quality    | Genome-fragment | NA | 2.89  | 0     |
| SS_vs_k141_61736          | [full]   | 18902 | No  | NA    | 0  | 14 | Not-determined | Genome-fragment | NA | 0     | 0     |
| SS_vs_k141_115175         | [full]   | 1862  | No  | NA    | 1  | 0  | Low-quality    | Genome-fragment | NA | 4.42  | 0     |
| S16_vs_59846              | [full]   | 1862  | No  | NA    | 2  | 0  | Low-quality    | Genome-fragment | NA | 6.29  | 0     |
| SS_vs_k141_92163          | [full]   | 2652  | No  | NA    | 0  | 1  | Not-determined | Genome-fragment | NA | 0     | 0     |
| S12_vs_k141_178236        | [full]   | 1862  | No  | NA    | 1  | 0  | Low-quality    | Genome-fragment | NA | 3.15  | 0     |
| S12_vs_k141_160749        | [H2gene] | 1862  | No  | NA    | 0  | 0  | Low-quality    | Genome-fragment | NA | 4.15  | 0     |
| S8_extracted_k141_151948  |          | 1862  | No  | NA    | 1  | 0  | Low-quality    | Genome-fragment | NA | 2.72  | 0     |
| S17_vs_k141_148910        | [full]   | 1863  | No  | NA    | 0  | 0  | Low-quality    | Genome-fragment | NA | 3.08  | 0     |
| SS_vs_k141_73635          | [full]   | 1077  | No  | NA    | 0  | 0  | Not-determined | Genome-fragment | NA | 4.5   | 0     |
| S11_extracted_k141_25988  |          | 1863  | No  | NA    | 1  | 0  | Low-quality    | Genome-fragment | NA | 4.5   | 0     |
| S7_vs_68688               | [full]   | 1863  | No  | NA    | 0  | 0  | Low-quality    | Genome-fragment | NA | 3.95  | 0     |
| SS_vs_k141_1480           | [full]   | 2531  | No  | NA    | 0  | 4  | Not-determined | Genome-fragment | NA | 0     | 0     |
| SS_vs_k141_128398         | [full]   | 56290 | No  | NA    | 18 | 0  | Medium-quality | Genome-fragment | NA | 55.6  | 0     |
| SS_vs_k141_110413         | [full]   | 2221  | No  | NA    | 0  | 2  | Not-determined | Genome-fragment | NA | 0     | 0     |
| SS_vs_k141_73676          | [full]   | 1605  | No  | NA    | 0  | 0  | Not-determined | Genome-fragment | NA | 0     | 0     |
| S10_vs_104108             | [full]   | 1863  | No  | NA    | 2  | 0  | Low-quality    | Genome-fragment | NA | 4.78  | 0     |
| SS_vs_k141_134497         | [full]   | 1320  | No  | NA    | 0  | 1  | Not-determined | Genome-fragment | NA | 0     | 0     |
| S10_vs_119812             | [full]   | 1863  | No  | NA    | 2  | 0  | Low-quality    | Genome-fragment | NA | 3.22  | 0     |
| S12_vs_k141_97559         | [full]   | 1863  | No  | NA    | 0  | 0  | Low-quality    | Genome-fragment | NA | 3.76  | 0     |
| S17_vs_k141_165181        | [full]   | 1864  | No  | NA    | 1  | 0  | Low-quality    | Genome-fragment | NA | 3.21  | 0     |
| SS_vs_k141_117929         | [full]   | 1864  | No  | NA    | 0  | 0  | Low-quality    | Genome-fragment | NA | 2.43  | 0     |
| SS_vs_k141_49639          | [full]   | 1580  | No  | NA    | 0  | 0  | Not-determined | Genome-fragment | NA | 3.14  | 0     |
| S3_extracted_k141_57873   |          | 1864  | No  | NA    | 0  | 0  | Low-quality    | Genome-fragment | NA | 0     | 0     |
| SS_vs_k141_123256         | [full]   | 86610 | Yes | 31697 | 11 | 31 | Medium-quality | Genome-fragment | NA | 51.46 | 63.4  |
| SS_vs_k141_132541         | [full]   | 31809 | No  | NA    | 13 | 3  | Medium-quality | Genome-fragment | NA | 81.74 | 0     |
| SS_extracted_k141_58428   |          | 1864  | No  | NA    | 0  | 0  | Low-quality    | Genome-fragment | NA | 4.79  | 0     |
| S16_vs_158818             | [full]   | 1864  | No  | NA    | 0  | 2  | Low-quality    | Genome-fragment | NA | 0.59  | 0     |
| SS_vs_k141_97999          | [full]   | 2113  | No  | NA    | 0  | 3  | Not-determined | Genome-fragment | NA | 0     | 0     |
| SS_vs_k141_134534         | [full]   | 5765  | No  | NA    | 0  | 4  | Not-determined | Genome-fragment | NA | 0     | 0     |
| S10_extracted_5501        |          | 1864  | No  | NA    | 0  | 0  | Low-quality    | Genome-fragment | NA | 2.22  | 0     |
| SS_vs_k141_31905          | [full]   | 1926  | No  | NA    | 0  | 0  | Not-determined | Genome-fragment | NA | 0     | 0     |
| SS_vs_k141_1522           | [full]   | 1264  | No  | NA    | 0  | 2  | Not-determined | Genome-fragment | NA | 0     | 0     |
| SS_vs_k141_98006          | [full]   | 1879  | No  | NA    | 0  | 1  | Not-determined | Genome-fragment | NA | 0     | 0     |
| SS_vs_k141_117024         | [full]   | 1108  | No  | NA    | 0  | 1  | Not-determined | Genome-fragment | NA | 0     | 0     |
| SS_vs_k141_134540         | [full]   | 1441  | No  | NA    | 0  | 0  | Not-determined | Genome-fragment | NA | 0     | 0     |
| S12_vs_k141_111442        | [full]   | 1864  | No  | NA    | 0  | 1  | Low-quality    | Genome-fragment | NA | 1.16  | 0     |
| S12_vs_k141_83780         | [full]   | 1864  | No  | NA    | 0  | 0  | Low-quality    | Genome-fragment | NA | 4.88  | 0     |
| SS_vs_k141_1552           | [full]   | 1130  | No  | NA    | 0  | 1  | Not-determined | Genome-fragment | NA | 0     | 0     |
| S15_vs_6441               | [full]   | 1864  | No  | NA    | 0  | 0  | Low-quality    | Genome-fragment | NA | 2.78  | 0     |
| SS_vs_k141_49689          | [full]   | 5878  | No  | NA    | 0  | 4  | Not-determined | Genome-fragment | NA | 0     | 0     |
| SS_vs_k141_20850          | [full]   | 1865  | No  | NA    | 2  | 0  | Low-quality    | Genome-fragment | NA | 5.85  | 0     |
| S7_vs_94157               | [full]   | 1865  | No  | NA    | 0  | 0  | Low-quality    | Genome-fragment | NA | 3.67  | 0     |
| SS_vs_k141_104399         | [full]   | 1539  | No  | NA    | 0  | 0  | Not-determined | Genome-fragment | NA | 0     | 0     |
| SS_vs_k141_61857          | [full]   | 1620  | No  | NA    | 0  | 0  | Not-determined | Genome-fragment | NA | 0     | 0     |
| S16_extracted_55540       |          | 1865  | No  | NA    | 0  | 0  | Low-quality    | Genome-fragment | NA | 4.13  | 0     |
| SS_vs_k141_140597         | [full]   | 1676  | No  | NA    | 1  | 1  | Not-determined | Genome-fragment | NA | 0     | 0     |
| S16_vs_128652             | [H2gene] | 1865  | No  | NA    | 2  | 0  | Low-quality    | Genome-fragment | NA | 4.73  | 0     |
| S10_vs_23468              | [full]   | 1865  | Yes | 930   | 1  | 3  | Low-quality    | Genome-fragment | NA | 1.86  | 50.13 |
| S12_vs_k141_142992        | [full]   | 1865  | No  | NA    | 0  | 1  | Low-quality    | Genome-fragment | NA | 0     | 0     |
| SS_vs_k141_110537         | [full]   | 1940  | No  | NA    | 0  | 1  | Not-determined | Genome-fragment | NA | 0     | 0     |
| SS_vs_k141_13303          | [full]   | 1443  | No  | NA    | 0  | 1  | Not-determined | Genome-fragment | NA | 0     | 0     |
| SS_vs_k141_14897          | [full]   | 3911  | No  | NA    | 0  | 2  | Not-determined | Genome-fragment | NA | 0     | 0     |
| S12_vs_k141_117742        | [full]   | 1865  | No  | NA    | 0  | 1  | Low-quality    | Genome-fragment | NA | 2.96  | 0     |
| SS_vs_k141_92424          | [full]   | 1046  | No  | NA    | 0  | 1  | Not-determined | Genome-fragment | NA | 0     | 0     |
| S8_extracted_k141_47797   |          | 1865  | No  | NA    | 0  | 0  | Low-quality    | Genome-fragment | NA | 1.05  | 0     |
| SS_vs_k141_110559         | [full]   | 6099  | No  | NA    | 0  | 0  | Not-determined | Genome-fragment | NA | 0     | 0     |
| S17_extracted_k141_170745 |          | 1866  | No  | NA    | 5  | 0  | Low-quality    | Genome-fragment | NA | 6.15  | 0     |
| SS_vs_k141_1572           | [full]   | 37649 | No  | NA    | 7  | 3  | Medium-quality | Genome-fragment | NA | 83.1  | 0     |
| S17_extracted_k141_14085  |          | 1866  | No  | NA    | 3  | 0  | Low-quality    | Genome-fragment | NA | 6.15  | 0     |
| S17_vs_k141_146571        | [full]   | 1866  | No  | NA    | 1  | 0  | Low-quality    | Genome-fragment | NA | 32.62 | 0     |
| S13_extracted_21591       |          | 1866  | No  | NA    | 0  | 0  | Low-quality    | Genome-fragment | NA | 2.94  | 0     |
| S1_vs_k141_117197         | [full]   | 1866  | No  | NA    | 1  | 0  | Low-quality    | Genome-fragment | NA | 3.19  | 0     |
| S1_vs_k141_105073         | [full]   | 1866  | No  | NA    | 0  | 0  | Low-quality    | Genome-fragment | NA | 2.3   | 0     |
| SS_vs_k141_67971          | [full]   | 16082 | No  | NA    | 0  | 9  | Not-determined | Genome-fragment | NA | 0     | 0     |
| S7_vs_42668               | [full]   | 1866  | No  | NA    | 1  | 0  | Low-quality    | Genome-fragment | NA | 2.79  | 0     |
| S7_vs_96508               | [full]   | 1866  | No  | NA    | 0  | 0  | Low-quality    | Genome-fragment | NA | 4.48  | 0     |
| S12_vs_k141_11464         | [full]   | 1866  | Yes | 729   | 1  | 1  | Low-quality    | Genome-fragment | NA | 0.45  | 60.93 |
| S4_extracted_13336        |          | 1866  | No  | NA    | 3  | 0  | Low-quality    | Genome-fragment | NA | 6.15  | 0     |
| SS_vs_k141_110613         | [full]   | 1371  | No  | NA    | 0  | 0  | Not-determined | Genome-fragment | NA | 0     | 0     |
| SS_vs_k141_49808          | [full]   | 3458  | No  | NA    | 0  | 2  | Not-determined | Genome-fragment | NA | 0     | 0     |
| S8_vs_k141_56158          | [full]   | 1866  | No  | NA    | 1  | 0  | Low-quality    | Genome-fragment | NA | 4.47  | 0     |
| SS_vs_k141_160863         | [full]   | 1866  | No  | NA    | 1  | 0  | Low-quality    | Genome-fragment | NA | 1.29  | 0     |
| S14_vs_k141_56112         | [full]   | 1867  | No  | NA    | 1  | 0  | Low-quality    | Genome-fragment | NA | 4.47  | 0     |
| SS_vs_k141_115566         | [full]   | 1867  | No  | NA    | 2  | 0  | Low-quality    | Genome-fragment | NA | 4.12  | 0     |
| S16_extracted_53505       |          | 1867  | No  | NA    | 1  | 0  | Low-quality    | Genome-fragment | NA | 4.53  | 0     |
| SS_vs_k141_49827          | [full]   | 2779  | No  | NA    | 1  | 3  | Not-determined | Genome-fragment | NA | 0     | 0     |
| S10_vs_114820             | [full]   | 1867  | No  | NA    | 1  | 0  | Low-quality    | Genome-fragment | NA | 4.02  | 0     |
| SS_vs_k141_104525         | [full]   | 3135  | No  | NA    | 0  | 2  | Not-determined | Genome-fragment | NA | 0     | 0     |
| S12_vs_k141_77044         | [full]   | 1867  | No  | NA    | 0  | 0  | Low-quality    | Genome-fragment | NA | 4.05  | 0     |
| SS_vs_k141_92533          | [full]   | 2306  | No  | NA    | 0  | 2  | Not-determined | Genome-fragment | NA | 0     | 0     |
| SS_vs_k141_15440          | [full]   | 3098  | No  | NA    | 0  | 2  | Not-determined | Genome-fragment | NA | 0     | 0     |
| S17_vs_k141_25729         | [full]   | 1868  | No  | NA    | 0  | 0  | Low-quality    | Genome-fragment | NA | 4.47  | 0     |
| SS_vs_k141_117173         | [full]   | 2270  | No  | NA    | 0  | 0  | Not-determined | Genome-fragment | NA | 0     | 0     |
| S14_extracted_k141_116845 |          | 1868  | No  | NA    | 0  | 0  | Low-quality    | Genome-fragment | NA | 3.19  | 0     |
| S1_vs_k141_159646         | [full]   | 1868  | No  | NA    | 0  | 3  | Low-quality    | Genome-fragment | NA | 0.83  | 0     |
| S12_vs_k141_12026         | [full]   | 1868  | Yes | 987   | 1  | 1  | Low-quality    | Genome-fragment | NA | 33.09 | 47.16 |
| S8_extracted_k141_73812   |          | 1868  | No  | NA    | 0  | 0  | Low-quality    | Genome-fragment | NA | 3.32  | 0     |
| SS_vs_k141_128499         | [full]   | 3716  | No  | NA    | 0  | 2  | Not-determined | Genome-fragment | NA | 0     | 0     |
| SS_vs_k141_98061          | [full]   | 2441  | No  | NA    | 0  | 1  | Not-determined | Genome-fragment | NA | 0     | 0     |
| S8_vs_k141_48938          | [full]   | 1868  | No  | NA    | 0  | 0  | Low-quality    | Genome-fragment | NA | 0.79  | 0     |
| SS_vs_k141_49850          | [full]   | 2182  | No  | NA    | 0  | 2  | Not-determined | Genome-fragment | NA | 0     | 0     |
| S17_vs_k141_153979        | [full]   | 1869  | No  | NA    | 0  | 2  | Low-quality    | Genome-fragment | NA | 2.34  | 0     |
| S1_vs_k141_27527          | [full]   | 1869  | No  | NA    | 1  | 0  | Low-quality    | Genome-fragment | NA | 0     | 0     |
| SS_vs_k141_128558         | [full]   | 3050  | No  | NA    | 0  | 2  | Not-determined | Genome-fragment | NA | 0     | 0     |
| SS_vs_k141_12157          | [full]   | 1582  | No  | NA    | 0  | 2  | Not-determined | Genome-fragment | NA | 0     | 0     |
| SS_vs_k141_15572          | [full]   | 4132  | No  | NA    | 0  | 2  | Not-determined | Genome-fragment | NA | 0     | 0     |
| S1_vs_k141_139406         | [full]   | 1869  | No  | NA    | 1  | 0  | Low-quality    | Genome-fragment | NA | 4.14  | 0     |
| S3_extracted_k141_69013   |          | 1869  | No  | NA    | 1  | 0  | Low-quality    | Genome-fragment | NA | 1.34  | 0     |
| S7_extracted_131352       |          | 1869  | No  | NA    | 0  | 0  | Low-quality    | Genome-fragment | NA | 4.53  | 0     |
| SS_vs_k141_117191         | [full]   | 2207  | No  | NA    | 0  | 0  | Not-determined | Genome-fragment | NA | 0     | 0     |
| S7_extracted_127030       |          | 1869  | No  | NA    | 0  | 0  | Low-quality    | Genome-fragment | NA | 4.13  | 0     |
| SS_vs_k141_10588          | [full]   | 1725  | No  | NA    | 0  | 0  | Not-determined | Genome-fragment | NA | 0     | 0     |
| SS_vs_k141_49905          | [full]   | 6459  | No  | NA    | 0  | 6  | Not-determined | Genome-fragment | NA | 0     | 0     |
| SS_vs_k141_24919          | [full]   | 1934  | No  | NA    | 0  | 1  | Not-determined | Genome-fragment | NA | 0     | 0     |
| SS_vs_k141_15512          | [full]   | 1559  | No  | NA    | 0  | 2  | Not-determined | Genome-fragment | NA | 0     | 0     |
| SS_vs_k141_128608         | [full]   | 1868  | No  | NA    | 0  | 1  | Not-determined | Genome-fragment | NA | 0     | 0     |
| S11_vs_k141_81732         | [full]   | 1870  | No  | NA    | 2  | 0  | Low-quality    | Genome-fragment | NA | 3.89  | 0     |
| S3_vs_k141_111829         | [full]   | 1870  | Yes | 1101  | 1  | 1  | Low-quality    | Genome-fragment | NA | 0.75  | 41.12 |
| SS_vs_k141_44163          | [full]   | 5065  | No  | NA    | 0  | 0  | Not-determined | Genome-fragment | NA | 0     | 0     |
| S3_vs_k141_4364           | [full]   | 1870  | No  | NA    | 0  | 0  | Low-quality    | Genome-fragment | NA | 1.22  | 0     |
| S3_vs_k141_15151          | [full]   | 1870  | No  | NA    | 1  | 0  | Low-quality    | Genome-fragment | NA | 4.13  | 0     |
| SS_vs_k141_49915          | [full]   | 2397  | No  | NA    | 0  | 0  | Not-determined | Genome-fragment | NA | 0     | 0     |
| SS_vs_k141_134579         | [full]   | 1610  | No  | NA    | 0  | 1  | Not-determined | Genome-fragment | NA | 0     | 0     |
| SS_vs_k141_13434          | [full]   | 1786  | No  | NA    | 0  | 2  | Not-determined | Genome-fragment | NA | 0     | 0     |
| S16_vs_50046              | [full]   | 1870  | No  | NA    | 0  | 0  | Low-quality    | Genome-fragment | NA | 3.48  | 0     |
| S16_vs_5096               | [full]   | 1870  | No  | NA    | 0  | 2  | Low-quality    | Genome-fragment | NA | 3.32  | 0     |
| S4_extracted_25051        |          | 1870  | No  | NA    | 2  | 0  | Low-quality    | Genome-fragment | NA | 3.18  | 0     |
| SS_vs_k141_50328          | [full]   | 1871  | No  | NA    | 2  | 0  | Low-quality    | Genome-fragment | NA | 3.03  | 0     |
| SS_vs_k141_1731           | [full]   | 2222  | No  | NA    | 0  | 3  | Not-determined | Genome-fragment | NA | 0     | 0     |
| S7_vs_49663               | [full]   | 1871  | No  | NA    | 1  | 0  | Low-quality    | Genome-fragment | NA | 1.12  | 0     |
| S10_extracted_106184      |          | 1871  | No  | NA    | 1  | 0  | Low-quality    | Genome-fragment | NA | 1.43  | 0     |
| SS_vs_k141_13482          | [full]   | 8316  | No  | NA    | 4  | 4  | Not-determined | Genome-fragment | NA | 0     | 0     |
| S10_vs_5588               | [full]   | 1871  | No  | NA    | 0  | 0  | Low-quality    | Genome-fragment | NA | 1.26  | 0     |
| SS_vs_k141_7598           | [full]   | 3521  | No  | NA    | 0  | 1  | Not-determined | Genome-fragment | NA | 0     | 0     |
| S10_vs_10896              | [full]   | 1871  | No  | NA    | 0  | 1  | Low-quality    | Genome-fragment | NA | 2.46  | 0     |
| S12_extracted_k141_142448 |          | 1871  | No  |       |    |    |                |                 |    |       |       |



|                           |       |    |    |    |    |                |                 |       |       |
|---------------------------|-------|----|----|----|----|----------------|-----------------|-------|-------|
| S11_extracted_k141_90780  | 1877  | No | NA | 0  | 0  | Low-quality    | Genome-fragment | 2.82  | 0     |
| S11_vo_k141_95186[ full   | 1877  | No | NA | 1  | 0  | Low-quality    | Genome-fragment | 3.02  | 0     |
| S13_vo_134140[ full       | 1877  | No | NA | 0  | 2  | Low-quality    | Genome-fragment | 2.44  | 0     |
| S14_vo_k141_41484[ full   | 1877  | No | NA | 0  | 0  | Low-quality    | Genome-fragment | 3.9   | 0     |
| S14_vo_k141_25128[ t2gene | 1877  | No | NA | 1  | 0  | Low-quality    | Genome-fragment | 4.53  | 0     |
| SS_vo_k141_62152[ full    | 4449  | No | NA | 0  | 1  | Not-determined | Genome-fragment | NA    | 0     |
| SS_vo_k141_133813[ full   | 1877  | No | NA | 0  | 0  | Low-quality    | Genome-fragment | 3.84  | 0     |
| SS_vo_k141_55598[ full    | 8259  | No | NA | 0  | 9  | Not-determined | Genome-fragment | NA    | 0     |
| SS_vo_k141_117417[ full   | 19656 | No | NA | 1  | 0  | Medium-quality | Genome-fragment | 50.78 | 0     |
| SS_vo_k141_1973[ full     | 1372  | No | NA | 0  | 1  | Not-determined | Genome-fragment | NA    | 0     |
| S7_vo_135111[ full        | 1877  | No | NA | 0  | 0  | Low-quality    | Genome-fragment | 3.28  | 0     |
| SS_vo_k141_124129[ full   | 2894  | No | NA | 3  | 1  | Not-determined | Genome-fragment | NA    | 0     |
| SS_vo_k141_140856[ full   | 4985  | No | NA | 0  | 0  | Not-determined | Genome-fragment | NA    | 0     |
| S12_vo_k141_59622[ full   | 1877  | No | NA | 5  | 0  | Low-quality    | Genome-fragment | 5.37  | 0     |
| SS_vo_k141_124743[ full   | 1878  | No | NA | 1  | 0  | Low-quality    | Genome-fragment | 4.98  | 0     |
| SS_vo_k141_622161[ full   | 3161  | No | NA | 0  | 2  | Not-determined | Genome-fragment | NA    | 0     |
| SS_vo_k141_80165[ full    | 1878  | No | NA | 1  | 0  | Low-quality    | Genome-fragment | 3.47  | 0     |
| S10_extracted_58364       | 1878  | No | NA | 0  | 0  | Low-quality    | Genome-fragment | 3.83  | 0     |
| S10_extracted_79221       | 1878  | No | NA | 0  | 2  | Low-quality    | Genome-fragment | 0.5   | 0     |
| S12_vo_k141_25761[ full   | 1878  | No | NA | 0  | 0  | Low-quality    | Genome-fragment | 4.57  | 0     |
| SS_vo_k141_7785[ full     | 2572  | No | NA | 0  | 2  | Not-determined | Genome-fragment | NA    | 0     |
| SS_vo_k141_128854[ full   | 14458 | No | NA | 0  | 2  | Not-determined | Genome-fragment | NA    | 0     |
| S12_vo_k141_183312[ full  | 1878  | No | NA | 0  | 2  | Low-quality    | Genome-fragment | 2.94  | 0     |
| SS_vo_k141_128855[ full   | 1205  | No | NA | 0  | 0  | Not-determined | Genome-fragment | NA    | 0     |
| S12_vo_k141_121818[ full  | 1878  | No | NA | 1  | 0  | Low-quality    | Genome-fragment | 3.76  | 0     |
| S9_vo_k141_28864[ full    | 1879  | No | NA | 2  | 0  | Low-quality    | Genome-fragment | 2.7   | 0     |
| S14_extracted_k141_30752  | 1879  | No | NA | 0  | 1  | Low-quality    | Genome-fragment | 0.83  | 0     |
| SS_vo_k141_55666[ full    | 1026  | No | NA | 0  | 1  | Not-determined | Genome-fragment | NA    | 0     |
| S1_vo_k141_103087[ full   | 1879  | No | NA | 0  | 0  | Low-quality    | Genome-fragment | 5.18  | 0     |
| S1_vo_k141_157757[ full   | 1879  | No | NA | 0  | 0  | Low-quality    | Genome-fragment | 2.64  | 0     |
| S7_vo_70051[ full         | 1879  | No | NA | 1  | 0  | Low-quality    | Genome-fragment | 3.64  | 0     |
| SS_vo_k141_134795[ full   | 1088  | No | NA | 0  | 0  | Not-determined | Genome-fragment | NA    | 0     |
| SS_vo_k141_68305[ full    | 2459  | No | NA | 0  | 1  | Not-determined | Genome-fragment | NA    | 0     |
| S7_vo_49848[ full         | 1879  | No | NA | 3  | 0  | Low-quality    | Genome-fragment | 4.34  | 0     |
| SS_vo_k141_68161[ full    | 2096  | No | NA | 0  | 2  | Not-determined | Genome-fragment | NA    | 0     |
| SS_vo_k141_51818[ full    | 7812  | No | NA | 0  | 4  | Not-determined | Genome-fragment | NA    | 0     |
| SS_vo_k141_128881[ full   | 26715 | No | NA | 6  | 0  | Medium-quality | Genome-fragment | 54.47 | 0     |
| SS_vo_k141_12882[ full    | 20826 | No | NA | 0  | 16 | Not-determined | Genome-fragment | NA    | 0     |
| SS_vo_k141_86562[ full    | 17878 | No | NA | 7  | 1  | High-quality   | Genome-fragment | 100   | 0     |
| S7_vo_110362[ full        | 1879  | No | NA | 1  | 0  | Low-quality    | Genome-fragment | 3.43  | 0     |
| S12_vo_k141_88800[ full   | 1879  | No | NA | 0  | 1  | Low-quality    | Genome-fragment | 2.34  | 0     |
| S8_extracted_k141_70223   | 1879  | No | NA | 0  | 0  | Low-quality    | Genome-fragment | 5.79  | 0     |
| S9_extracted_k141_59883   | 1880  | No | NA | 0  | 0  | Low-quality    | Genome-fragment | 3.14  | 0     |
| S9_vo_k141_11866[ full    | 1880  | No | NA | 0  | 1  | Low-quality    | Genome-fragment | 4.74  | 0     |
| S2_vo_k141_63952[ full    | 1880  | No | NA | 1  | 0  | Low-quality    | Genome-fragment | 4.48  | 0     |
| SS_vo_k141_111011[ full   | 3772  | No | NA | 0  | 2  | Not-determined | Genome-fragment | NA    | 0     |
| SS_vo_k141_2037[ full     | 1423  | No | NA | 0  | 0  | Not-determined | Genome-fragment | NA    | 0     |
| S7_vo_13288[ full         | 1880  | No | NA | 0  | 0  | Low-quality    | Genome-fragment | 3.7   | 0     |
| S10_extracted_45219       | 1880  | No | NA | 1  | 1  | Low-quality    | Genome-fragment | 8.34  | 68.78 |
| SS_vo_k141_79720[ full    | 4599  | No | NA | 0  | 3  | Not-determined | Genome-fragment | NA    | 0     |
| S8_vo_k141_154170[ full   | 1880  | No | NA | 0  | 0  | Low-quality    | Genome-fragment | 8.21  | 0     |
| SS_vo_k141_140946[ full   | 26678 | No | NA | 0  | 0  | Medium-quality | Genome-fragment | 68.08 | 0     |
| S11_vo_k141_49437[ full   | 1881  | No | NA | 1  | 0  | Low-quality    | Genome-fragment | 1.92  | 0     |
| SS_vo_k141_128952[ full   | 2338  | No | NA | 0  | 3  | Not-determined | Genome-fragment | NA    | 0     |
| SS_extracted_k141_126341  | 1881  | No | NA | 0  | 2  | Low-quality    | Genome-fragment | 1.39  | 0     |
| S7_vo_21161[ full         | 1881  | No | NA | 0  | 0  | Low-quality    | Genome-fragment | 3.54  | 0     |
| S16_vo_12331[ full        | 1881  | No | NA | 1  | 0  | Low-quality    | Genome-fragment | 2.79  | 0     |
| SS_vo_k141_11018[ full    | 1951  | No | NA | 0  | 0  | Not-determined | Genome-fragment | NA    | 0     |
| SS_vo_k141_68353[ full    | 5182  | No | NA | 0  | 4  | Not-determined | Genome-fragment | NA    | 0     |
| S6_extracted_k141_15912   | 1881  | No | NA | 0  | 2  | Low-quality    | Genome-fragment | 1.87  | 0     |
| SS_vo_k141_11753[ full    | 1581  | No | NA | 0  | 1  | Not-determined | Genome-fragment | NA    | 0     |
| SS_vo_k141_10979[ full    | 1913  | No | NA | 0  | 1  | Not-determined | Genome-fragment | NA    | 0     |
| SS_vo_k141_50368[ full    | 2407  | No | NA | 0  | 0  | Not-determined | Genome-fragment | NA    | 0     |
| S8_extracted_k141_3859    | 1881  | No | NA | 0  | 1  | Low-quality    | Genome-fragment | 0.49  | 0     |
| S17_extracted_k141_99561  | 1882  | No | NA | 0  | 0  | Low-quality    | Genome-fragment | 3.95  | 0     |
| S14_vo_k141_67214[ full   | 1882  | No | NA | 1  | 0  | Low-quality    | Genome-fragment | 4.81  | 0     |
| SS_vo_k141_84356[ full    | 1882  | No | NA | 0  | 0  | Low-quality    | Genome-fragment | 3.34  | 0     |
| SS_vo_k141_12894[ full    | 1457  | No | NA | 0  | 1  | Not-determined | Genome-fragment | NA    | 0     |
| SS_vo_k141_1422[ t2gene   | 1882  | No | NA | 0  | 0  | Low-quality    | Genome-fragment | 3.89  | 0     |
| SS_vo_k141_25212[ full    | 2353  | No | NA | 0  | 0  | Not-determined | Genome-fragment | NA    | 0     |
| S16_vo_119841[ full       | 1882  | No | NA | 0  | 4  | Low-quality    | Genome-fragment | 2.91  | 0     |
| S8_vo_k141_50368[ full    | 1882  | No | NA | 0  | 0  | Low-quality    | Genome-fragment | 4.57  | 0     |
| S11_vo_k141_67327[ full   | 1883  | No | NA | 0  | 1  | Low-quality    | Genome-fragment | 3.36  | 0     |
| S14_extracted_k141_4344   | 1883  | No | NA | 0  | 1  | Low-quality    | Genome-fragment | 1.82  | 0     |
| S14_vo_k141_4332[ full    | 1883  | No | NA | 0  | 2  | Low-quality    | Genome-fragment | 3.79  | 0     |
| S3_vo_k141_57297[ full    | 1883  | No | NA | 0  | 0  | Low-quality    | Genome-fragment | 3.58  | 0     |
| SS_vo_k141_31315[ full    | 1883  | No | NA | 0  | 0  | Low-quality    | Genome-fragment | 1.24  | 0     |
| SS_vo_k141_18309[ full    | 1883  | No | NA | 0  | 0  | Low-quality    | Genome-fragment | 4.38  | 0     |
| S7_extracted_74230        | 1883  | No | NA | 0  | 0  | Low-quality    | Genome-fragment | 8.6   | 0     |
| SS_vo_k141_134883[ full   | 4598  | No | NA | 0  | 5  | Not-determined | Genome-fragment | NA    | 0     |
| SS_vo_k141_15279[ full    | 2104  | No | NA | 0  | 1  | Not-determined | Genome-fragment | NA    | 0     |
| S7_extracted_117495       | 1883  | No | NA | 0  | 1  | Low-quality    | Genome-fragment | 1.77  | 0     |
| SS_vo_k141_86714[ full    | 2608  | No | NA | 0  | 1  | Not-determined | Genome-fragment | NA    | 0     |
| SS_vo_k141_2116[ full     | 8417  | No | NA | 0  | 8  | Not-determined | Genome-fragment | NA    | 0     |
| S7_vo_6851[ full          | 1883  | No | NA | 0  | 0  | Low-quality    | Genome-fragment | 1.44  | 0     |
| SS_vo_k141_129075[ full   | 1561  | No | NA | 0  | 0  | Not-determined | Genome-fragment | NA    | 0     |
| S7_vo_36901[ full         | 1883  | No | NA | 3  | 0  | Low-quality    | Genome-fragment | 3.07  | 0     |
| S7_vo_100992[ full        | 1883  | No | NA | 0  | 1  | Low-quality    | Genome-fragment | 2.81  | 0     |
| SS_vo_k141_13866[ full    | 1512  | No | NA | 0  | 2  | Not-determined | Genome-fragment | NA    | 0     |
| SS_vo_k141_32555[ full    | 2276  | No | NA | 0  | 2  | Not-determined | Genome-fragment | NA    | 0     |
| SS_vo_k141_8678[ full     | 7292  | No | NA | 0  | 0  | Not-determined | Genome-fragment | NA    | 0     |
| SS_vo_k141_62278[ full    | 2428  | No | NA | 0  | 0  | Not-determined | Genome-fragment | NA    | 0     |
| S16_vo_53203[ full        | 1883  | No | NA | 1  | 0  | Low-quality    | Genome-fragment | 3.65  | 0     |
| S10_vo_43966[ full        | 1883  | No | NA | 0  | 1  | Low-quality    | Genome-fragment | 3.46  | 0     |
| SS_vo_k141_14573[ full    | 2816  | No | NA | 2  | 1  | Not-determined | Genome-fragment | NA    | 0     |
| S12_extracted_k141_75583  | 1883  | No | NA | 2  | 0  | Low-quality    | Genome-fragment | 3.03  | 0     |
| SS_vo_k141_79810[ full    | 5647  | No | NA | 0  | 3  | Not-determined | Genome-fragment | NA    | 0     |
| S12_vo_k141_116782[ full  | 1883  | No | NA | 1  | 0  | Low-quality    | Genome-fragment | 1.54  | 0     |
| SS_vo_k141_13848[ full    | 4347  | No | NA | 0  | 2  | Not-determined | Genome-fragment | NA    | 0     |
| S9_vo_k141_39096[ full    | 1884  | No | NA | 3  | 0  | Low-quality    | Genome-fragment | 4.66  | 0     |
| SS_vo_k141_117726[ full   | 3769  | No | NA | 0  | 1  | Not-determined | Genome-fragment | NA    | 0     |
| S11_extracted_k141_10023  | 1884  | No | NA | 0  | 0  | Low-quality    | Genome-fragment | 4.61  | 0     |
| SS_vo_k141_68464[ full    | 3261  | No | NA | 0  | 2  | Not-determined | Genome-fragment | NA    | 0     |
| SS_vo_k141_97716[ full    | 1884  | No | NA | 1  | 0  | Low-quality    | Genome-fragment | 4.07  | 0     |
| SS_vo_k141_1125[ full     | 40010 | No | NA | 14 | 1  | High-quality   | Genome-fragment | 94.63 | 0     |
| SS_vo_k141_50535[ full    | 3012  | No | NA | 0  | 2  | Not-determined | Genome-fragment | NA    | 0     |
| SS_vo_k141_10395[ full    | 1884  | No | NA | 2  | 0  | Low-quality    | Genome-fragment | 4.78  | 0     |
| SS_vo_k141_79872[ full    | 1136  | No | NA | 0  | 0  | Not-determined | Genome-fragment | NA    | 0     |
| S7_vo_113497[ full        | 1884  | No | NA | 0  | 0  | Low-quality    | Genome-fragment | 5.23  | 0     |
| SS_vo_k141_86758[ full    | 1348  | No | NA | 0  | 1  | Not-determined | Genome-fragment | NA    | 0     |
| S7_vo_125064[ full        | 1884  | No | NA | 0  | 0  | Low-quality    | Genome-fragment | 4.73  | 0     |
| S16_vo_23870[ full        | 1884  | No | NA | 0  | 0  | Low-quality    | Genome-fragment | 1.07  | 0     |
| SS_vo_k141_14008[ full    | 1371  | No | NA | 0  | 2  | Not-determined | Genome-fragment | NA    | 0     |
| SS_vo_k141_19999[ full    | 3813  | No | NA | 0  | 1  | Not-determined | Genome-fragment | NA    | 0     |
| S16_vo_61613[ full        | 1884  | No | NA | 0  | 0  | Low-quality    | Genome-fragment | 4.81  | 0     |
| S12_vo_k141_7634[ full    | 1884  | No | NA | 0  | 2  | Low-quality    | Genome-fragment | 1.19  | 0     |
| SS_vo_k141_93073[ full    | 2789  | No | NA | 0  | 2  | Not-determined | Genome-fragment | NA    | 0     |
| S8_extracted_k141_47022   | 1884  | No | NA | 0  | 0  | Low-quality    | Genome-fragment | 3.82  | 0     |
| SS_vo_k141_117777[ full   | 1662  | No | NA | 0  | 2  | Not-determined | Genome-fragment | NA    | 0     |
| SS_vo_k141_93095[ full    | 1235  | No | NA | 0  | 0  | Not-determined | Genome-fragment | NA    | 0     |
| S17_vo_k141_21982[ full   | 1885  | No | NA | 0  | 0  | Low-quality    | Genome-fragment | 2.26  | 0     |
| SS_vo_k141_2436[ full     | 2408  | No | NA | 0  | 2  | Not-determined | Genome-fragment | NA    | 0     |
| S13_vo_88541[ full        | 1885  | No | NA | 1  | 0  | Low-quality    | Genome-fragment | 2.15  | 0     |
| SS_vo_k141_62359[ full    | 1042  | No | NA | 0  | 0  | Not-determined | Genome-fragment | NA    | 0     |
| S13_vo_124491[ t2gene     | 1885  | No | NA | 0  | 0  | Low-quality    | Genome-fragment | 5.02  | 0     |
| SS_vo_k141_68538[ full    | 1653  | No | NA | 0  | 0  | Not-determined | Genome-fragment | NA    | 0     |
| SS_vo_k141_88544[ full    | 1840  | No | NA | 0  | 0  | Not-determined | Genome-fragment | NA    | 0     |
| SS_vo_k141_20643[ full    | 1665  | No | NA | 0  | 0  | Not-determined | Genome-fragment | NA    | 0     |
| SS_vo_k141_75123[ full    | 1885  | No | NA | 1  | 0  | Low-quality    | Genome-fragment | 4.68  | 0     |
| SS_vo_k141_137229[ t2gene | 1885  | No | NA | 0  | 0  | Low-quality    | Genome-fragment | 4.82  | 0     |
| S7_vo_46173[ full         | 1885  | No | NA | 1  | 0  | Low-quality    | Genome-fragment | 2.9   | 0     |
| SS_vo_k141_18184[ full    | 4450  | No | NA | 0  | 0  | Not-determined | Genome-fragment | NA    | 0     |
| S16_extracted_92260       | 1885  | No | NA | 0  | 1  | Low-quality    | Genome-fragment | 4.33  | 0     |
| SS_vo_k141_15146[ full    | 1885  | No | NA | 1  | 0  | Low-quality    | Genome-fragment | 3.47  | 0     |
| S8_extracted_k141_34980   | 1885  | No | NA | 0  | 1  | Low-quality    | Genome-fragment | 5.49  | 0     |
| S17_vo_k141_112517[ full  | 1886  | No | NA | 0  | 1  | Low-quality    | Genome-fragment | 1.53  | 0     |
| SS_vo_k141_105324[ full   | 1698  | No | NA | 0  | 1  | Not-determined | Genome-fragment | NA    | 0     |
| S9_vo_k141_2408[ full     | 1886  | No | NA | 3  | 0  | Low-quality    | Genome-fragment | 4.98  | 0     |
| S3_extracted_k141_102936  | 1886  | No | NA | 1  | 0  | Low-quality    | Genome-fragment | 3.76  | 0     |
| SS_vo_k141_103938[ full   | 1886  | No | NA | 0  | 1  | Low-quality    | Genome-fragment | 1.28  | 0     |
| SS_vo_k141_5147[ full     | 3262  | No | NA | 0  | 1  | Not-determined | Genome-fragment | NA    | 0     |
| SS_vo_k14                 |       |    |    |    |    |                |                 |       |       |



|                           |          |       |     |       |    |    |                |                 |       |       |
|---------------------------|----------|-------|-----|-------|----|----|----------------|-----------------|-------|-------|
| S14_vs_k141_77769         | [full]   | 1888  | No  | NA    | 3  | 0  | Low-quality    | Genome-fragment | 4.64  | 0     |
| S5_vs_k141_11230          | [full]   | 1006  | No  | NA    | 2  | 0  | Not-determined | Genome-fragment | NA    | 0     |
| S5_vs_k141_32818          | [full]   | 1415  | No  | NA    | 0  | 0  | Not-determined | Genome-fragment | NA    | 0     |
| S1_vs_k141_108439         | [full]   | 1888  | No  | NA    | 0  | 0  | Low-quality    | Genome-fragment | 4.6   | 0     |
| S5_vs_k141_13228          | [full]   | 1481  | No  | NA    | 0  | 2  | Not-determined | Genome-fragment | NA    | 0     |
| S3_extracted_k141_133065  | [full]   | 1888  | No  | NA    | 0  | 0  | Low-quality    | Genome-fragment | 0.61  | 0     |
| S5_vs_k141_105527         | [full]   | 1823  | No  | NA    | 0  | 3  | Not-determined | Genome-fragment | NA    | 0     |
| S3_vs_k141_27572          | [full]   | 1888  | No  | NA    | 2  | 0  | Low-quality    | Genome-fragment | 5.29  | 0     |
| S5_vs_k141_129881         | [full]   | 2829  | No  | NA    | 0  | 0  | Not-determined | Genome-fragment | NA    | 0     |
| S3_vs_k141_36226          | [full]   | 1888  | No  | NA    | 1  | 0  | Low-quality    | Genome-fragment | 4.35  | 0     |
| S5_extracted_k141_26919   | [full]   | 1888  | No  | NA    | 3  | 0  | Low-quality    | Genome-fragment | 6.23  | 0     |
| S5_vs_k141_14125          | [full]   | 1226  | No  | NA    | 0  | 1  | Not-determined | Genome-fragment | NA    | 0     |
| S5_vs_k141_118033         | [full]   | 3204  | No  | NA    | 0  | 1  | Not-determined | Genome-fragment | NA    | 0     |
| S5_vs_k141_111251         | [full]   | 6819  | No  | NA    | 0  | 1  | Not-determined | Genome-fragment | NA    | 0     |
| S5_vs_k141_8637           | [full]   | 1888  | No  | NA    | 3  | 0  | Low-quality    | Genome-fragment | 7.87  | 0     |
| S5_vs_k141_6388           | [full]   | 3840  | No  | NA    | 0  | 1  | Not-determined | Genome-fragment | NA    | 0     |
| S5_vs_k141_14309          | [full]   | 2001  | No  | NA    | 0  | 1  | Not-determined | Genome-fragment | NA    | 0     |
| S5_vs_k141_8391           | [full]   | 1126  | No  | NA    | 0  | 1  | Not-determined | Genome-fragment | NA    | 0     |
| S7_vs_19112               | [full]   | 1888  | No  | NA    | 0  | 0  | Low-quality    | Genome-fragment | 3.7   | 0     |
| S12_extracted_k141_87731  | [full]   | 1888  | No  | NA    | 1  | 0  | Low-quality    | Genome-fragment | 5.72  | 0     |
| S5_vs_k141_105614         | [full]   | 1114  | No  | NA    | 0  | 1  | Not-determined | Genome-fragment | NA    | 0     |
| S5_vs_k141_124019         | [full]   | 2950  | No  | NA    | 0  | 3  | Not-determined | Genome-fragment | NA    | 0     |
| S6_vs_k141_20569          | [full]   | 1888  | No  | NA    | 1  | 0  | Low-quality    | Genome-fragment | 3.37  | 0     |
| S8_extracted_k141_128910  | [full]   | 1888  | No  | NA    | 2  | 0  | Low-quality    | Genome-fragment | 3.82  | 0     |
| S5_vs_k141_124035         | [full]   | 12251 | No  | NA    | 1  | 3  | High-quality   | High-quality    | 100   | 0     |
| S5_vs_k141_10815          | [full]   | 2670  | No  | NA    | 0  | 0  | Not-determined | Genome-fragment | NA    | 0     |
| S5_vs_k141_141328         | [full]   | 1538  | No  | NA    | 0  | 0  | Not-determined | Genome-fragment | NA    | 0     |
| S9_vs_k141_80425          | [full]   | 1889  | No  | NA    | 0  | 0  | Low-quality    | Genome-fragment | 3.66  | 0     |
| S7_vs_115685              | [full]   | 1889  | No  | NA    | 0  | 0  | Low-quality    | Genome-fragment | 6.01  | 0     |
| S16_vs_53269              | [full]   | 1889  | No  | NA    | 1  | 0  | Low-quality    | Genome-fragment | 3.53  | 0     |
| S12_vs_k141_172549        | [full]   | 1889  | No  | NA    | 0  | 0  | Low-quality    | Genome-fragment | 4.21  | 0     |
| S17_extracted_k141_45402  | [full]   | 1890  | No  | NA    | 0  | 0  | Low-quality    | Genome-fragment | 1.09  | 0     |
| S5_vs_k141_25525          | [full]   | 2715  | No  | NA    | 0  | 0  | Not-determined | Genome-fragment | NA    | 0     |
| S5_vs_k141_20244          | [full]   | 5094  | No  | NA    | 0  | 4  | Not-determined | Genome-fragment | NA    | 0     |
| S17_extracted_k141_117786 | [full]   | 1890  | No  | NA    | 0  | 0  | Low-quality    | Genome-fragment | 2.83  | 0     |
| S3_vs_k141_17020          | [full]   | 1890  | No  | NA    | 0  | 0  | Low-quality    | Genome-fragment | 1.28  | 0     |
| S5_vs_k141_117501         | [full]   | 1890  | No  | NA    | 2  | 0  | Low-quality    | Genome-fragment | 5.2   | 0     |
| S5_vs_k141_9129           | [full]   | 2218  | No  | NA    | 0  | 1  | Not-determined | Genome-fragment | NA    | 0     |
| S5_vs_k141_18307          | [full]   | 3865  | No  | NA    | 0  | 1  | Not-determined | Genome-fragment | NA    | 0     |
| S5_vs_k141_7656           | [full]   | 3144  | No  | NA    | 0  | 4  | Not-determined | Genome-fragment | NA    | 0     |
| S16_extracted_5063        | [full]   | 1890  | No  | NA    | 0  | 1  | Low-quality    | Genome-fragment | 1.07  | 0     |
| S5_vs_k141_25547          | [full]   | 1947  | No  | NA    | 0  | 2  | Not-determined | Genome-fragment | NA    | 0     |
| S5_vs_k141_20268          | [full]   | 14771 | No  | NA    | 13 | 0  | Medium-quality | Genome-fragment | 60.47 | 0     |
| S12_extracted_k141_114391 | [full]   | 1890  | No  | NA    | 0  | 0  | Low-quality    | Genome-fragment | 2.96  | 0     |
| S12_vs_k141_6956          | [full]   | 1890  | No  | NA    | 1  | 0  | Low-quality    | Genome-fragment | 2.76  | 0     |
| S5_vs_k141_18347          | [full]   | 5920  | No  | NA    | 0  | 1  | Not-determined | Genome-fragment | NA    | 0     |
| S5_vs_k141_79992          | [full]   | 54138 | Yes | 36331 | 15 | 10 | High-quality   | High-quality    | 92.92 | 32.89 |
| S5_vs_k141_10984          | [full]   | 2517  | No  | NA    | 0  | 0  | Not-determined | Genome-fragment | NA    | 0     |
| S8_extracted_k141_155608  | [full]   | 1890  | No  | NA    | 0  | 0  | Low-quality    | Genome-fragment | 3.03  | 0     |
| S17_vs_k141_117127        | [H2gene] | 1891  | No  | NA    | 1  | 0  | Low-quality    | Genome-fragment | 6.04  | 0     |
| S5_vs_k141_141439         | [full]   | 3606  | No  | NA    | 0  | 0  | Not-determined | Genome-fragment | NA    | 0     |
| S5_vs_k141_9725           | [full]   | 1891  | No  | NA    | 0  | 0  | Low-quality    | Genome-fragment | 4.06  | 0     |
| S5_vs_k141_20332          | [full]   | 2107  | No  | NA    | 0  | 1  | Not-determined | Genome-fragment | NA    | 0     |
| S5_vs_k141_14415          | [full]   | 6022  | No  | NA    | 0  | 0  | Not-determined | Genome-fragment | NA    | 0     |
| S5_vs_k141_25346          | [full]   | 1935  | No  | NA    | 0  | 0  | Not-determined | Genome-fragment | NA    | 0     |
| S11_extracted_k141_86062  | [full]   | 1891  | No  | NA    | 0  | 0  | Low-quality    | Genome-fragment | 4.41  | 0     |
| S5_vs_k141_25704          | [full]   | 2895  | No  | NA    | 0  | 1  | Not-determined | Genome-fragment | NA    | 0     |
| S5_vs_k141_80023          | [full]   | 6036  | No  | NA    | 0  | 6  | Not-determined | Genome-fragment | NA    | 0     |
| S5_vs_k141_105791         | [full]   | 1728  | No  | NA    | 0  | 1  | Not-determined | Genome-fragment | NA    | 0     |
| S13_vs_23669              | [full]   | 1891  | No  | NA    | 0  | 3  | Low-quality    | Genome-fragment | 4.22  | 0     |
| S13_vs_120202             | [full]   | 1891  | No  | NA    | 2  | 0  | Low-quality    | Genome-fragment | 3.22  | 0     |
| S14_vs_k141_58212         | [full]   | 1891  | No  | NA    | 0  | 0  | Low-quality    | Genome-fragment | 3.75  | 0     |
| S1_extracted_k141_25399   | [full]   | 1891  | No  | NA    | 0  | 1  | Low-quality    | Genome-fragment | 0.68  | 0     |
| S3_vs_k141_121237         | [full]   | 1891  | No  | NA    | 1  | 0  | Low-quality    | Genome-fragment | 1.22  | 0     |
| S5_vs_k141_91149          | [full]   | 1891  | No  | NA    | 0  | 2  | Low-quality    | Genome-fragment | 1.98  | 0     |
| S5_vs_k141_56079          | [full]   | 1309  | No  | NA    | 0  | 0  | Not-determined | Genome-fragment | NA    | 0     |
| S5_vs_k141_80047          | [full]   | 1440  | No  | NA    | 0  | 2  | Not-determined | Genome-fragment | NA    | 0     |
| S5_vs_k141_2831           | [full]   | 4934  | No  | NA    | 0  | 3  | Not-determined | Genome-fragment | NA    | 0     |
| S16_extracted_6427        | [full]   | 1891  | No  | NA    | 0  | 2  | Low-quality    | Genome-fragment | 2.01  | 0     |
| S5_vs_k141_20364          | [full]   | 1134  | No  | NA    | 0  | 1  | Not-determined | Genome-fragment | NA    | 0     |
| S5_vs_k141_2844           | [full]   | 1243  | No  | NA    | 0  | 2  | Not-determined | Genome-fragment | NA    | 0     |
| S5_vs_k141_105849         | [full]   | 2134  | No  | NA    | 0  | 1  | Not-determined | Genome-fragment | NA    | 0     |
| S5_vs_k141_98439          | [full]   | 2853  | No  | NA    | 0  | 2  | Not-determined | Genome-fragment | NA    | 0     |
| S5_vs_k141_15072          | [full]   | 2810  | No  | NA    | 0  | 3  | Not-determined | Genome-fragment | NA    | 0     |
| S5_vs_k141_118168         | [full]   | 34729 | No  | NA    | 17 | 0  | Medium-quality | Genome-fragment | 78.83 | 0     |
| S5_vs_k141_20390          | [full]   | 2832  | No  | NA    | 0  | 2  | Not-determined | Genome-fragment | NA    | 0     |
| S5_vs_k141_124252         | [full]   | 5312  | No  | NA    | 0  | 4  | Not-determined | Genome-fragment | NA    | 0     |
| S5_vs_k141_16044          | [full]   | 1193  | No  | NA    | 0  | 2  | Not-determined | Genome-fragment | NA    | 0     |
| S16_vs_122763             | [H2gene] | 1891  | No  | NA    | 0  | 0  | Low-quality    | Genome-fragment | 4.68  | 0     |
| S5_vs_k141_32885          | [full]   | 39417 | No  | NA    | 13 | 1  | Medium-quality | Genome-fragment | 83.27 | 0     |
| S5_vs_k141_3876           | [full]   | 2236  | No  | NA    | 18 | 2  | Medium-quality | Genome-fragment | 55.91 | 0     |
| S8_extracted_k141_66158   | [full]   | 1891  | No  | NA    | 0  | 0  | Low-quality    | Genome-fragment | 3.01  | 0     |
| S5_vs_k141_68818          | [full]   | 3880  | No  | NA    | 0  | 3  | Not-determined | Genome-fragment | NA    | 0     |
| S17_extracted_k141_148601 | [full]   | 1892  | No  | NA    | 0  | 1  | Low-quality    | Genome-fragment | 2.33  | 0     |
| S3_vs_k141_67648          | [H2gene] | 1892  | No  | NA    | 2  | 0  | Low-quality    | Genome-fragment | 4.81  | 0     |
| S5_vs_k141_68821          | [full]   | 3159  | No  | NA    | 0  | 3  | Not-determined | Genome-fragment | NA    | 0     |
| S5_vs_k141_9570           | [full]   | 1892  | No  | NA    | 1  | 0  | Low-quality    | Genome-fragment | 4.56  | 0     |
| S7_extracted_12317        | [full]   | 1892  | No  | NA    | 0  | 0  | Low-quality    | Genome-fragment | 4.67  | 0     |
| S7_vs_20536               | [full]   | 1892  | No  | NA    | 0  | 0  | Low-quality    | Genome-fragment | 0.69  | 0     |
| S10_extracted_64080       | [full]   | 1892  | No  | NA    | 0  | 2  | Low-quality    | Genome-fragment | 0.69  | 0     |
| S5_vs_13137               | [full]   | 1892  | No  | NA    | 0  | 1  | Low-quality    | Genome-fragment | 0.55  | 0     |
| S5_vs_k141_6560           | [full]   | 1088  | No  | NA    | 0  | 0  | Not-determined | Genome-fragment | NA    | 0     |
| S9_vs_k141_3825           | [H2gene] | 1893  | No  | NA    | 1  | 0  | Low-quality    | Genome-fragment | 4.44  | 0     |
| S5_vs_k141_135225         | [full]   | 1043  | No  | NA    | 0  | 1  | Not-determined | Genome-fragment | NA    | 0     |
| S5_vs_k141_25521          | [full]   | 2319  | No  | NA    | 0  | 1  | Not-determined | Genome-fragment | NA    | 0     |
| S16_vs_68257              | [full]   | 1893  | No  | NA    | 3  | 0  | Low-quality    | Genome-fragment | 4.05  | 0     |
| S12_extracted_k141_81482  | [full]   | 1893  | No  | NA    | 1  | 0  | Low-quality    | Genome-fragment | 1.75  | 0     |
| S12_vs_k141_179759        | [full]   | 1893  | No  | NA    | 2  | 0  | Low-quality    | Genome-fragment | 4.54  | 0     |
| S5_vs_k141_10464          | [full]   | 6979  | No  | NA    | 0  | 0  | Not-determined | Genome-fragment | NA    | 0     |
| S5_vs_k141_2941           | [full]   | 3737  | No  | NA    | 0  | 0  | Not-determined | Genome-fragment | NA    | 0     |
| S5_vs_k141_20469          | [full]   | 1210  | No  | NA    | 0  | 2  | Not-determined | Genome-fragment | NA    | 0     |
| S5_vs_k141_2948           | [full]   | 2519  | No  | NA    | 0  | 1  | Not-determined | Genome-fragment | NA    | 0     |
| S5_vs_k141_2952           | [full]   | 3309  | No  | NA    | 0  | 1  | Not-determined | Genome-fragment | NA    | 0     |
| S14_vs_k141_10207         | [full]   | 1894  | No  | NA    | 0  | 0  | Low-quality    | Genome-fragment | 1.2   | 0     |
| S14_vs_k141_87380         | [full]   | 1894  | No  | NA    | 0  | 0  | Low-quality    | Genome-fragment | 4.63  | 0     |
| S3_vs_k141_104045         | [full]   | 1894  | No  | NA    | 1  | 0  | Low-quality    | Genome-fragment | 3.65  | 0     |
| S5_vs_k141_2981           | [full]   | 1533  | No  | NA    | 0  | 1  | Not-determined | Genome-fragment | NA    | 0     |
| S5_vs_k141_15430          | [full]   | 1894  | No  | NA    | 2  | 0  | Low-quality    | Genome-fragment | 4.38  | 0     |
| S5_vs_k141_50883          | [full]   | 32027 | No  | NA    | 0  | 0  | High-quality   | Genome-fragment | 99.67 | 0     |
| S7_vs_114815              | [full]   | 1894  | No  | NA    | 0  | 0  | Low-quality    | Genome-fragment | 3.89  | 0     |
| S5_vs_k141_105904         | [full]   | 3368  | No  | NA    | 0  | 0  | Not-determined | Genome-fragment | NA    | 0     |
| S12_vs_k141_33485         | [full]   | 1894  | No  | NA    | 0  | 0  | Low-quality    | Genome-fragment | 1.27  | 0     |
| S8_vs_k141_37098          | [full]   | 1894  | No  | NA    | 0  | 0  | Low-quality    | Genome-fragment | 5.09  | 0     |
| S5_vs_k141_67218          | [full]   | 1895  | No  | NA    | 0  | 1  | Low-quality    | Genome-fragment | 1.52  | 0     |
| S10_extracted_4952        | [full]   | 1895  | No  | NA    | 0  | 0  | Low-quality    | Genome-fragment | 4.02  | 0     |
| S5_vs_k141_124369         | [full]   | 2693  | No  | NA    | 0  | 0  | Not-determined | Genome-fragment | NA    | 0     |
| S10_vs_26768              | [full]   | 1895  | No  | NA    | 2  | 0  | Low-quality    | Genome-fragment | 4.36  | 0     |
| S12_vs_k141_29227         | [full]   | 1895  | No  | NA    | 2  | 0  | Low-quality    | Genome-fragment | 5.58  | 0     |
| S5_vs_k141_14558          | [full]   | 1208  | No  | NA    | 0  | 0  | Not-determined | Genome-fragment | NA    | 0     |
| S8_extracted_k141_31492   | [full]   | 1895  | No  | NA    | 0  | 0  | Low-quality    | Genome-fragment | 5.95  | 0     |
| S5_vs_k141_38540          | [full]   | 2221  | No  | NA    | 0  | 0  | Not-determined | Genome-fragment | NA    | 0     |
| S17_vs_k141_147821        | [full]   | 1896  | No  | NA    | 0  | 0  | Low-quality    | Genome-fragment | 1.04  | 0     |
| S5_vs_k141_44877          | [full]   | 1725  | No  | NA    | 0  | 2  | Not-determined | Genome-fragment | NA    | 0     |
| S5_vs_k141_17021          | [full]   | 2756  | No  | NA    | 0  | 2  | Not-determined | Genome-fragment | NA    | 0     |
| S17_vs_k141_112022        | [full]   | 1896  | No  | NA    | 0  | 0  | Low-quality    | Genome-fragment | 3.58  | 0     |
| S11_extracted_k141_95911  | [full]   | 1896  | No  | NA    | 0  | 0  | Low-quality    | Genome-fragment | 1.39  | 0     |
| S11_vs_k141_63523         | [full]   | 1896  | No  | NA    | 2  | 0  | Low-quality    | Genome-fragment | 3.36  | 0     |
| S3_vs_k141_24628          | [full]   | 1896  | No  | NA    | 0  | 1  | Low-quality    | Genome-fragment | 2.99  | 0     |
| S5_vs_k141_62702          | [full]   | 1108  | No  | NA    | 0  | 1  | Not-determined | Genome-fragment | NA    | 0     |
| S7_vs_103404              | [full]   | 1896  | No  | NA    | 1  | 0  | Low-quality    | Genome-fragment | 4.37  | 0     |
| S5_vs_k141_10500          | [full]   | 77104 | Yes | 33200 | 16 | 25 | Complete       | High-quality    | 100   | 53.7  |
| S5_vs_k141_106005         | [full]   | 2030  | No  | NA    | 0  | 2  | Not-determined | Genome-fragment | NA    | 0     |
| S5_vs_k141_25844          | [full]   | 2784  | No  | NA    | 0  | 2  | Not-determined | Genome-fragment | NA    | 0     |
| S5_vs_k141_80213          | [full]   | 2276  | No  | NA    | 0  | 2  | Not-determined | Genome-fragment | NA    | 0     |
| S16_vs_155426             | [full]   | 1896  | No  | NA    | 0  | 0  | Low-quality    | Genome-fragment | 4.4   | 0     |
| S5_vs_k141_56155          | [full]   | 1824  | No  | NA    | 0  | 0  | Not-determined | Genome-fragment | NA    | 0     |
| S2_vs_k141_13425          | [full]   | 1896  | No  | NA    | 0  | 0  | Low-quality    | Genome-fragment |       |       |



|                           |        |     |       |      |                |                 |                 |       |       |
|---------------------------|--------|-----|-------|------|----------------|-----------------|-----------------|-------|-------|
| S1_extracted_k141_147143  | 1901   | No  | NA    | 0    | 1              | Low-quality     | Genome-fragment | 1.7   | 0     |
| S5_vs_k141_56224  full    | 2210   | No  | NA    | 1    | 1              | Not-determined  | Genome-fragment | NA    | 0     |
| S7_extracted_40561        | 1901   | No  | NA    | 0    | 0              | Low-quality     | Genome-fragment | 1.15  | 0     |
| S16_extracted_140266      | 1901   | No  | NA    | 0    | 2              | Low-quality     | Genome-fragment | 0.7   | 0     |
| S5_vs_k141_69055  full    | 8578   | No  | NA    | 0    | 4              | Not-determined  | Genome-fragment | NA    | 0     |
| S16_vs_72057  full        | 1901   | No  | NA    | 1    | 0              | Low-quality     | Genome-fragment | 2.97  | 0     |
| S10_vs_2595  full         | 1901   | No  | NA    | 0    | 1              | Low-quality     | Genome-fragment | 0.53  | 0     |
| S5_vs_k141_111569  full   | 1180   | No  | NA    | 0    | 1              | Not-determined  | Genome-fragment | NA    | 0     |
| S5_vs_k141_129899  full   | 1666   | No  | NA    | 0    | 2              | Not-determined  | Genome-fragment | NA    | 0     |
| S8_vs_k141_73080  full    | 1901   | No  | NA    | 1    | 0              | Low-quality     | Genome-fragment | 1.03  | 0     |
| S5_vs_k141_38688  full    | 9822   | No  | NA    | 0    | 6              | Not-determined  | Genome-fragment | NA    | 0     |
| S9_vs_k141_33066  full    | 1902   | No  | NA    | 0    | 0              | Low-quality     | Genome-fragment | 5.21  | 0     |
| S5_vs_k141_3349  full     | 2243   | No  | NA    | 0    | 0              | Not-determined  | Genome-fragment | NA    | 0     |
| S5_vs_k141_56302  full    | 1314   | No  | NA    | 0    | 0              | Not-determined  | Genome-fragment | NA    | 0     |
| S16_vs_67030  full        | 1902   | No  | NA    | 2    | 0              | Low-quality     | Genome-fragment | 2.96  | 0     |
| S16_vs_113253  full       | 1902   | No  | NA    | 2    | 0              | Low-quality     | Genome-fragment | 4.03  | 0     |
| S5_vs_k141_3354  full     | 1431   | No  | NA    | 0    | 0              | Not-determined  | Genome-fragment | NA    | 0     |
| S10_vs_76787  full        | 1902   | No  | NA    | 0    | 1              | Low-quality     | Genome-fragment | 2.81  | 0     |
| S5_vs_k141_69083  full    | 23514  | No  | NA    | 12   | 0              | Medium-quality  | Genome-fragment | 60.39 | 0     |
| S5_vs_k141_111610  full   | 1299   | No  | NA    | 0    | 2              | Not-determined  | Genome-fragment | NA    | 0     |
| S5_vs_k141_129920  full   | 6064   | No  | NA    | 0    | 2              | Not-determined  | Genome-fragment | NA    | 0     |
| S5_vs_k141_59085  full    | 1878   | No  | NA    | 0    | 0              | Not-determined  | Genome-fragment | NA    | 0     |
| S5_vs_k141_111616  full   | 1665   | No  | NA    | 0    | 1              | Not-determined  | Genome-fragment | NA    | 0     |
| S12_vs_k141_87144  full   | 1902   | No  | NA    | 0    | 0              | Low-quality     | Genome-fragment | 5.11  | 0     |
| S8_extracted_k141_114150  | 1902   | No  | NA    | 0    | 1              | Low-quality     | Genome-fragment | 1.07  | 0     |
| S5_vs_k141_56335  full    | 8543   | No  | NA    | 0    | 2              | Not-determined  | Genome-fragment | NA    | 0     |
| S9_vs_k141_54241  full    | 1903   | No  | NA    | 0    | 1              | Low-quality     | Genome-fragment | 3.57  | 0     |
| S14_extracted_k141_113212 | 1903   | No  | NA    | 0    | 0              | Low-quality     | Genome-fragment | 4.36  | 0     |
| S5_vs_k141_8630  full     | 6012   | No  | NA    | 3    | Not-determined | Genome-fragment | NA              | 0     |       |
| S5_vs_k141_45126  full    | 4195   | No  | NA    | 0    | 0              | Not-determined  | Genome-fragment | NA    | 0     |
| S14_vs_k141_20092  full   | 1903   | No  | NA    | 2    | 0              | Low-quality     | Genome-fragment | 4.68  | 0     |
| S5_vs_k141_74476  full    | 2135   | No  | NA    | 0    | 0              | Not-determined  | Genome-fragment | NA    | 0     |
| S5_vs_k141_74478  full    | 1616   | No  | NA    | 0    | 0              | Not-determined  | Genome-fragment | NA    | 0     |
| S5_vs_k141_69150  full    | 1919   | No  | NA    | 0    | 0              | Not-determined  | Genome-fragment | NA    | 0     |
| S5_vs_k141_12416  full    | 38157  | No  | NA    | 14   | 0              | High-quality    | High-quality    | 99.54 | 0     |
| S5_vs_k141_38785  full    | 1616   | No  | NA    | 0    | 2              | Not-determined  | Genome-fragment | NA    | 0     |
| S5_vs_k141_69158  full    | 12724  | No  | NA    | 0    | 6              | Not-determined  | Genome-fragment | NA    | 0     |
| S7_vs_36177  H2gene       | 1903   | No  | NA    | 2    | 0              | Low-quality     | Genome-fragment | 3.05  | 0     |
| S5_vs_k141_8847  full     | 21194  | No  | NA    | 1    | 3              | Medium-quality  | Genome-fragment | 64.14 | 0     |
| S5_vs_k141_56365  full    | 8770   | No  | NA    | 0    | 2              | Not-determined  | Genome-fragment | NA    | 0     |
| S12_extracted_k141_183850 | 1903   | No  | NA    | 1    | 0              | Low-quality     | Genome-fragment | 1.96  | 0     |
| S8_extracted_k141_204292  | 1903   | No  | NA    | 0    | 1              | Low-quality     | Genome-fragment | 6.08  | 0     |
| S5_vs_k141_93839  full    | 30686  | No  | NA    | 7    | 0              | Medium-quality  | Genome-fragment | 63.9  | 0     |
| S11_vs_k141_103786  full  | 1904   | No  | NA    | 1    | 0              | Low-quality     | Genome-fragment | 4.3   | 0     |
| S5_vs_k141_53840  full    | 2380   | No  | NA    | 0    | 2              | Not-determined  | Genome-fragment | NA    | 0     |
| S7_vs_30084  full         | 1904   | No  | NA    | 1    | 0              | Low-quality     | Genome-fragment | 5.23  | 0     |
| S12_vs_k141_167685  full  | 1904   | No  | NA    | 1    | 0              | Low-quality     | Genome-fragment | 4.22  | 0     |
| S12_vs_k141_161265  full  | 1904   | No  | NA    | 0    | 2              | Low-quality     | Genome-fragment | 3.62  | 0     |
| S5_vs_k141_20665  full    | 1904   | No  | NA    | 0    | 0              | Low-quality     | Genome-fragment | 2.36  | 0     |
| S5_vs_k141_3501  full     | 39219  | Yes | 23805 | 12   | 12             | Medium-quality  | Genome-fragment | 57.93 | 39.3  |
| S5_vs_k141_63007  full    | 2095   | No  | NA    | 0    | 1              | Not-determined  | Genome-fragment | NA    | 0     |
| S5_vs_k141_41692  full    | 6098   | No  | NA    | 0    | 0              | Not-determined  | Genome-fragment | NA    | 0     |
| S9_vs_k141_13080  full    | 1905   | No  | NA    | 0    | 1              | Low-quality     | Genome-fragment | 5.42  | 0     |
| S5_vs_k141_33187  full    | 2827   | No  | NA    | 0    | 3              | Not-determined  | Genome-fragment | NA    | 0     |
| S11_vs_k141_59246  full   | 1905   | No  | NA    | 0    | 1              | Low-quality     | Genome-fragment | 2.93  | 0     |
| S10_vs_52807  full        | 1905   | No  | NA    | 0    | 1              | Low-quality     | Genome-fragment | 3.81  | 0     |
| S14_extracted_k141_94580  | 1905   | No  | NA    | 2    | 0              | Low-quality     | Genome-fragment | 6.25  | 0     |
| S5_vs_k141_63025  full    | 1188   | No  | NA    | 0    | 1              | Not-determined  | Genome-fragment | NA    | 0     |
| S5_vs_k141_8922  full     | 1653   | No  | NA    | 0    | 0              | Not-determined  | Genome-fragment | NA    | 0     |
| S5_vs_k141_20793  full    | 2120   | No  | NA    | 0    | 1              | Not-determined  | Genome-fragment | NA    | 0     |
| S5_vs_k141_129970  full   | 32525  | No  | NA    | 4    | 2              | Medium-quality  | Genome-fragment | 70.81 | 0     |
| S14_vs_k141_47199  full   | 1905   | No  | NA    | 0    | 0              | Low-quality     | Genome-fragment | 5.9   | 0     |
| S14_vs_k141_3952  full    | 1905   | No  | NA    | 1    | 0              | Low-quality     | Genome-fragment | 5.18  | 0     |
| S5_vs_k141_45666  full    | 1905   | No  | NA    | 1    | 0              | Low-quality     | Genome-fragment | 4.74  | 0     |
| S7_vs_44395  full         | 1905   | No  | NA    | 0    | 1              | Low-quality     | Genome-fragment | 4.29  | 0     |
| S12_vs_k141_103827  full  | 1905   | No  | NA    | 0    | 1              | Low-quality     | Genome-fragment | 1.25  | 0     |
| S12_vs_k141_105493  full  | 1905   | No  | NA    | 1    | 0              | Low-quality     | Genome-fragment | 4.61  | 0     |
| S5_vs_k141_69273  full    | 14430  | No  | NA    | 0    | 2              | Not-determined  | Genome-fragment | NA    | 0     |
| S5_vs_k141_124677  full   | 105125 | Yes | 42430 | 22   | 50             | Medium-quality  | Genome-fragment | 81.67 | 59.6  |
| S5_vs_k141_63060  full    | 1970   | No  | NA    | 0    | 0              | Not-determined  | Genome-fragment | NA    | 0     |
| S17_extracted_k141_163607 | 1906   | No  | NA    | 1    | 0              | Low-quality     | Genome-fragment | 4.09  | 0     |
| S5_vs_k141_69292  full    | 2206   | No  | NA    | 0    | 1              | Not-determined  | Genome-fragment | NA    | 0     |
| S11_extracted_k141_9720   | 1906   | No  | NA    | 1    | 0              | Low-quality     | Genome-fragment | 4.54  | 0     |
| S5_vs_k141_118659  full   | 1902   | No  | NA    | 0    | 0              | Not-determined  | Genome-fragment | NA    | 0     |
| S11_vs_k141_36657  full   | 1906   | No  | NA    | 0    | 0              | Low-quality     | Genome-fragment | 3.84  | 0     |
| S5_vs_k141_129998  full   | 4268   | No  | NA    | 0    | 4              | Not-determined  | Genome-fragment | NA    | 0     |
| S3_vs_k141_1421  full     | 1906   | No  | NA    | 0    | 1              | Low-quality     | Genome-fragment | 2.32  | 0     |
| S5_vs_k141_99605  H2gene  | 1906   | No  | NA    | 2    | 0              | Low-quality     | Genome-fragment | 5.05  | 0     |
| S5_vs_k141_111745  full   | 2261   | No  | NA    | 0    | 0              | Not-determined  | Genome-fragment | NA    | 0     |
| S5_vs_k141_111760  full   | 1062   | No  | NA    | 0    | 0              | Not-determined  | Genome-fragment | NA    | 0     |
| S17_vs_k141_123414  full  | 1907   | No  | NA    | 1    | 0              | Low-quality     | Genome-fragment | 4.9   | 0     |
| S14_vs_k141_106490  full  | 1907   | No  | NA    | 0    | 1              | Low-quality     | Genome-fragment | 2.77  | 0     |
| S1_vs_k141_115682  full   | 1907   | No  | NA    | 0    | 0              | Low-quality     | Genome-fragment | 3.7   | 0     |
| S5_vs_k141_18617  full    | 1907   | No  | NA    | 0    | 0              | Low-quality     | Genome-fragment | 3.53  | 0     |
| S7_vs_54072  full         | 1907   | No  | NA    | 0    | 0              | Low-quality     | Genome-fragment | 2.95  | 0     |
| S10_vs_90661  full        | 1907   | No  | NA    | 0    | 0              | Low-quality     | Genome-fragment | 5.07  | 0     |
| S5_vs_k141_45370  full    | 1474   | No  | NA    | 0    | 0              | Not-determined  | Genome-fragment | NA    | 0     |
| S8_extracted_k141_96822   | 1907   | No  | NA    | 0    | 0              | Low-quality     | Genome-fragment | 1.36  | 0     |
| S5_vs_k141_63861  full    | 4119   | No  | NA    | 0    | 1              | Not-determined  | Genome-fragment | NA    | 0     |
| S17_extracted_k141_59314  | 1908   | No  | NA    | 0    | 2              | Low-quality     | Genome-fragment | 1.25  | 0     |
| S17_extracted_k141_135432 | 1908   | No  | NA    | 1    | 0              | Low-quality     | Genome-fragment | 4.02  | 0     |
| S5_vs_k141_130032  full   | 38770  | No  | NA    | 2870 | 1              | Medium-quality  | Genome-fragment | 85.11 | 0     |
| S5_vs_k141_3665  full     | 2814   | No  | NA    | 0    | 0              | Not-determined  | Genome-fragment | NA    | 0     |
| S17_vs_k141_44436  full   | 1908   | No  | NA    | 0    | 2              | Low-quality     | Genome-fragment | 1.17  | 0     |
| S9_vs_k141_67315  H2gene  | 1908   | No  | NA    | 0    | 0              | Low-quality     | Genome-fragment | 3.26  | 0     |
| S5_vs_k141_141881  full   | 1248   | No  | NA    | 0    | 2              | Not-determined  | Genome-fragment | NA    | 0     |
| S3_vs_k141_52327  full    | 1908   | No  | NA    | 1    | 0              | Low-quality     | Genome-fragment | 3.63  | 0     |
| S5_vs_k141_63211  full    | 1041   | No  | NA    | 0    | 0              | Not-determined  | Genome-fragment | NA    | 0     |
| S5_vs_k141_141894  full   | 1331   | No  | NA    | 0    | 1              | Not-determined  | Genome-fragment | NA    | 0     |
| S7_vs_41934  full         | 1908   | No  | NA    | 0    | 1              | Low-quality     | Genome-fragment | 4.07  | 0     |
| S16_vs_79278  full        | 1908   | No  | NA    | 0    | 1              | Low-quality     | Genome-fragment | 4.6   | 0     |
| S5_vs_k141_133111  full   | 1809   | No  | NA    | 1    | 1              | Not-determined  | Genome-fragment | NA    | 0     |
| S10_vs_14777  full        | 1908   | No  | NA    | 0    | 0              | Low-quality     | Genome-fragment | 3.74  | 0     |
| S5_vs_k141_151688  full   | 1343   | No  | NA    | 0    | 1              | Not-determined  | Genome-fragment | NA    | 0     |
| S5_vs_k141_151746  full   | 1991   | No  | NA    | 0    | 2              | Not-determined  | Genome-fragment | NA    | 0     |
| S5_vs_k141_3729  full     | 1794   | No  | NA    | 0    | 3              | Not-determined  | Genome-fragment | NA    | 0     |
| S13_extracted_79874       | 1909   | No  | NA    | 0    | 1              | Low-quality     | Genome-fragment | 2.99  | 0     |
| S5_vs_k141_12708  full    | 3538   | No  | NA    | 0    | 1              | Not-determined  | Genome-fragment | NA    | 0     |
| S3_vs_k141_13172  full    | 1909   | No  | NA    | 0    | 0              | Low-quality     | Genome-fragment | 2.5   | 0     |
| S4_extracted_24087        | 1909   | No  | NA    | 1    | 0              | Low-quality     | Genome-fragment | 4.31  | 0     |
| S8_extracted_k141_9996    | 1909   | No  | NA    | 0    | 1              | Low-quality     | Genome-fragment | 4.72  | 0     |
| S8_extracted_k141_140613  | 1909   | No  | NA    | 0    | 0              | Low-quality     | Genome-fragment | 0.35  | 0     |
| S17_vs_k141_22852  full   | 1910   | No  | NA    | 2    | 0              | Low-quality     | Genome-fragment | 3.41  | 0     |
| S17_vs_k141_59972  full   | 1910   | No  | NA    | 0    | 1              | Low-quality     | Genome-fragment | 1.03  | 0     |
| S5_vs_k141_38943  full    | 1060   | No  | NA    | 0    | 1              | Low-quality     | Genome-fragment | NA    | 0     |
| S5_vs_k141_118755  full   | 2183   | No  | NA    | 0    | 0              | Not-determined  | Genome-fragment | NA    | 0     |
| S5_vs_k141_106453  full   | 1538   | No  | NA    | 0    | 2              | Not-determined  | Genome-fragment | NA    | 0     |
| S5_vs_k141_30466  full    | 2617   | No  | NA    | 0    | 1              | Not-determined  | Genome-fragment | NA    | 0     |
| S17_vs_k141_177092  full  | 1910   | Yes | 1304  | 1    | 0              | Low-quality     | Genome-fragment | 3.04  | 31.73 |
| S14_vs_k141_105880  full  | 1910   | No  | NA    | 0    | 2              | Low-quality     | Genome-fragment | 2.79  | 0     |
| S14_vs_k141_77800  full   | 1910   | No  | NA    | 1    | 0              | Low-quality     | Genome-fragment | 4.91  | 0     |
| S1_extracted_k141_64565   | 1910   | No  | NA    | 0    | 0              | Low-quality     | Genome-fragment | 4.45  | 0     |
| S1_vs_k141_29298  full    | 1910   | No  | NA    | 0    | 0              | Low-quality     | Genome-fragment | 3.57  | 0     |
| S12_extracted_k141_8783   | 1910   | No  | NA    | 0    | 2              | Low-quality     | Genome-fragment | 1.36  | 0     |
| S12_vs_k141_58655  full   | 1910   | No  | NA    | 0    | 0              | Low-quality     | Genome-fragment | 2.68  | 0     |
| S8_vs_k141_177123  full   | 1910   | No  | NA    | 0    | 2              | Low-quality     | Genome-fragment | 1.36  | 0     |
| S7_vs_46828  full         | 1911   | No  | NA    | 1    | 0              | Low-quality     | Genome-fragment | 3.43  | 0     |
| S5_vs_k141_25973  full    | 1249   | No  | NA    | 1    | 1              | Not-determined  | Genome-fragment | NA    | 0     |
| S7_vs_108395  full        | 1911   | No  | NA    | 2    | 0              | Low-quality     | Genome-fragment | 4.21  | 0     |
| S5_vs_k141_3825  full     | 2572   | No  | NA    | 0    | 0              | Not-determined  | Genome-fragment | NA    | 0     |
| S16_extracted_90401       | 1911   | No  | NA    | 0    | 1              | Low-quality     | Genome-fragment | 0.19  | 0     |
| S16_vs_21034  full        | 1911   | No  | NA    | 0    | 1              | Low-quality     | Genome-fragment | 2.07  | 0     |
| S5_vs_k141_142039  full   | 3407   | No  | NA    | 0    | 3              | Not-determined  | Genome-fragment | NA    | 0     |
| S10_extracted_74345       | 1911   | No  | NA    | 0    | 1              | Low-quality     | Genome-fragment | 1.22  | 0     |
| S10_vs_56737  full        | 1911   | No  | NA    | 0    | 0              | Low-quality     | Genome-fragment | 4.09  | 0     |
| S1_extracted_k141_30679   | 1912   | No  | NA    | 2    | 0              | Low-quality     | Genome-fragment | 2.87  | 0     |
| S1_vs_k141_5227  full     | 1912   | No  | NA    | 1    | 0              | Low-quality     | Genome-fragment | 4.54  | 0     |
| S5_vs_k141_3046  full     | 4119   | No  | NA    | 0    | 0              | Not-determined  | Genome-fragment | NA    | 0     |
| S5_vs_k141_51812  full    | 8348   | No  | NA    | 0    | 1              | Not-determined  | Genome-fragment | NA    | 0     |
| S3_extracted_k141_84480   | 1912   | No  | NA    | 0    | 0              | Low-quality     | Genome-fragment | 2.11  | 0     |
| S5_vs_k141_26018  full    | 2053   | No  | NA    | 0    | 1              | Not-determined  | Genome-fragment | NA    | 0     |
| S5_vs_k141_63372  full    | 2720   | No  | NA    | 0    | 1              | Not-determined  | Genome-fragment | NA    | 0     |
| S5_vs_k141_112052  full   | 2772   | No  | NA    | 0    | 0              | Not-determined  | Genome-fragment | NA    | 0     |
| S16_vs_k141_16988  full   | 1912   | No  | NA</  |      |                |                 |                 |       |       |



|                             |        |     |    |       |    |                |                 |                 |       |       |
|-----------------------------|--------|-----|----|-------|----|----------------|-----------------|-----------------|-------|-------|
| S16_vs_134911[full]         | 1913   | No  | NA | 0     | 1  | Low-quality    | Genome-fragment | 2.36            | 0     |       |
| S5_vs_k141_130294[full]     | 43034  | No  | NA | 3     | 16 | High-quality   | High-quality    | 100             | 0     |       |
| S5_vs_k141_88931[full]      | 2111   | No  | NA | 0     | 1  | Not-determined | Genome-fragment | NA              | 0     |       |
| S5_vs_k141_56587[full]      | 2368   | No  | NA | 0     | 1  | Not-determined | Genome-fragment | NA              | 0     |       |
| S16_vs_87077[full]          | 1913   | No  | NA | 1     | 0  | Low-quality    | Genome-fragment | 4.47            | 0     |       |
| S8_vs_k141_177745[full]     | 1913   | No  | NA | 0     | 0  | Low-quality    | Genome-fragment | 4.61            | 0     |       |
| S5_vs_k141_56590[full]      | 2199   | No  | NA | 0     | 0  | Not-determined | Genome-fragment | NA              | 0     |       |
| S5_vs_k141_142130[full]     | 2815   | No  | NA | 0     | 2  | Not-determined | Genome-fragment | NA              | 0     |       |
| S5_vs_k141_63483[full]      | 1558   | No  | NA | 1     | 1  | Not-determined | Genome-fragment | NA              | 0     |       |
| S9_extracted_k141_35619     | 1914   | No  | NA | 0     | 1  | Low-quality    | Genome-fragment | 1.06            | 0     |       |
| S1_extracted_k141_123806    | 1914   | No  | NA | 1     | 0  | Low-quality    | Genome-fragment | 2.25            | 0     |       |
| S5_vs_k141_124957[full]     | 3054   | No  | NA | 0     | 2  | Not-determined | Genome-fragment | NA              | 0     |       |
| S5_vs_k141_39027[full]      | 6598   | No  | NA | 0     | 5  | Not-determined | Genome-fragment | NA              | 0     |       |
| S7_vs_78774[full]           | 1914   | No  | NA | 0     | 0  | Low-quality    | Genome-fragment | 4.39            | 0     |       |
| S16_vs_146080[full]         | 1914   | No  | NA | 1     | 0  | Low-quality    | Genome-fragment | 2.93            | 0     |       |
| S5_vs_k141_84159[full]      | 1017   | No  | NA | 0     | 0  | Not-determined | Genome-fragment | NA              | 0     |       |
| S12_vs_k141_84139[full]     | 1914   | No  | NA | 1     | 0  | Low-quality    | Genome-fragment | 5.84            | 0     |       |
| S5_vs_k141_124991[full]     | 4070   | No  | NA | 0     | 4  | Not-determined | Genome-fragment | NA              | 0     |       |
| S12_vs_k141_135524[full]    | 1914   | No  | NA | 0     | 0  | Low-quality    | Genome-fragment | 2.44            | 0     |       |
| S5_vs_k141_9252[full]       | 4000   | No  | NA | 0     | 1  | Not-determined | Genome-fragment | NA              | 0     |       |
| S5_vs_k141_33625[full]      | 1386   | No  | NA | 0     | 0  | Not-determined | Genome-fragment | NA              | 0     |       |
| S12_vs_k141_161198[1/2]gene | 1914   | No  | NA | 2     | 0  | Low-quality    | Genome-fragment | 3.11            | 0     |       |
| S5_vs_k141_33641[full]      | 2107   | No  | NA | 0     | 0  | Not-determined | Genome-fragment | NA              | 0     |       |
| S5_vs_k141_80496[full]      | 150464 | Yes | NA | 44475 | 14 | 41             | Medium-quality  | Genome-fragment | 68.78 | 70.44 |
| S5_vs_k141_87456[full]      | 8279   | No  | NA | 0     | 3  | Not-determined | Genome-fragment | NA              | 0     |       |
| S8_vs_k141_142076[full]     | 1914   | No  | NA | 0     | 1  | Low-quality    | Genome-fragment | 1.66            | 0     |       |
| S5_vs_k141_106807[full]     | 2666   | No  | NA | 0     | 2  | Not-determined | Genome-fragment | NA              | 0     |       |
| S5_vs_k141_3908[full]       | 3054   | No  | NA | 0     | 1  | Not-determined | Genome-fragment | NA              | 0     |       |
| S17_extracted_k141_118938   | 1915   | No  | NA | 0     | 1  | Low-quality    | Genome-fragment | 0.71            | 0     |       |
| S5_vs_k141_45552[full]      | 1472   | No  | NA | 0     | 2  | Not-determined | Genome-fragment | NA              | 0     |       |
| S14_extracted_k141_81461    | 1915   | No  | NA | 4     | 0  | Low-quality    | Genome-fragment | 6.31            | 0     |       |
| S5_vs_k141_12075[full]      | 2215   | No  | NA | 1     | 0  | Not-determined | Genome-fragment | NA              | 0     |       |
| S14_vs_k141_111659[1/2]gene | 1915   | No  | NA | 1     | 0  | Low-quality    | Genome-fragment | 6.03            | 0     |       |
| S7_vs_120164[full]          | 1915   | No  | NA | 1     | 0  | Low-quality    | Genome-fragment | 4.65            | 0     |       |
| S5_vs_k141_130471[full]     | 15081  | No  | NA | 0     | 7  | Not-determined | Genome-fragment | NA              | 0     |       |
| S5_vs_k141_142195[full]     | 44815  | Yes | NA | 43797 | 22 | Medium-quality | Genome-fragment | 72.35           | 48.36 |       |
| S16_vs_15245[full]          | 1915   | No  | NA | 1     | 0  | Low-quality    | Genome-fragment | 4.43            | 0     |       |
| S16_vs_2322[full]           | 1915   | No  | NA | 0     | 0  | Low-quality    | Genome-fragment | 2.68            | 0     |       |
| S5_vs_k141_80498[full]      | 24008  | No  | NA | 24    | 0  | Not-determined | Genome-fragment | 59.39           | 0     |       |
| S5_vs_k141_125060[full]     | 1009   | No  | NA | 0     | 0  | Not-determined | Genome-fragment | NA              | 0     |       |
| S8_vs_k141_146601[full]     | 1915   | No  | NA | 2     | 0  | Low-quality    | Genome-fragment | 3.1             | 0     |       |
| S17_extracted_k141_85729    | 1916   | No  | NA | 0     | 0  | Low-quality    | Genome-fragment | 3.59            | 0     |       |
| S5_vs_k141_142213[full]     | 3149   | No  | NA | 0     | 4  | Not-determined | Genome-fragment | NA              | 0     |       |
| S5_vs_k141_39118[full]      | 2836   | No  | NA | 0     | 3  | Not-determined | Genome-fragment | NA              | 0     |       |
| S5_vs_k141_130476[full]     | 20990  | No  | NA | 4     | 0  | Medium-quality | Genome-fragment | 54.82           | 0     |       |
| S3_vs_k141_51746[full]      | 1916   | No  | NA | 0     | 0  | Low-quality    | Genome-fragment | 3.14            | 0     |       |
| S16_vs_124876[full]         | 1916   | No  | NA | 3     | 0  | Low-quality    | Genome-fragment | 5.83            | 0     |       |
| S16_vs_125462[full]         | 1916   | No  | NA | 0     | 0  | Low-quality    | Genome-fragment | 4.11            | 0     |       |
| S5_vs_k141_125099[full]     | 1151   | No  | NA | 0     | 0  | Not-determined | Genome-fragment | NA              | 0     |       |
| S10_extracted_23928         | 1916   | No  | NA | 1     | 0  | Low-quality    | Genome-fragment | 5.37            | 0     |       |
| S5_vs_k141_45618[full]      | 1716   | No  | NA | 0     | 2  | Not-determined | Genome-fragment | NA              | 0     |       |
| S5_vs_k141_51380[full]      | 1952   | No  | NA | 0     | 1  | Not-determined | Genome-fragment | NA              | 0     |       |
| S5_vs_k141_56627[full]      | 2097   | No  | NA | 0     | 0  | Not-determined | Genome-fragment | NA              | 0     |       |
| S5_vs_k141_106923[full]     | 3262   | No  | NA | 0     | 0  | Not-determined | Genome-fragment | NA              | 0     |       |
| S5_vs_k141_2412[full]       | 1713   | No  | NA | 0     | 2  | Not-determined | Genome-fragment | NA              | 0     |       |
| S17_vs_k141_32290[full]     | 1917   | No  | NA | 0     | 1  | Low-quality    | Genome-fragment | 4.39            | 0     |       |
| S9_vs_k141_36411[full]      | 1917   | No  | NA | 1     | 0  | Low-quality    | Genome-fragment | 3.96            | 0     |       |
| S5_vs_k141_106943[full]     | 3611   | No  | NA | 0     | 0  | Not-determined | Genome-fragment | NA              | 0     |       |
| S5_vs_k141_91811[full]      | 1411   | No  | NA | 0     | 1  | Not-determined | Genome-fragment | NA              | 0     |       |
| S11_vs_k141_66930[full]     | 1917   | No  | NA | 0     | 0  | Low-quality    | Genome-fragment | 2.19            | 0     |       |
| S5_vs_k141_99026[full]      | 1839   | No  | NA | 0     | 1  | Not-determined | Genome-fragment | NA              | 0     |       |
| S5_vs_k141_1161[full]       | 1580   | No  | NA | 0     | 2  | Not-determined | Genome-fragment | NA              | 0     |       |
| S14_extracted_k141_71630    | 1917   | No  | NA | 0     | 0  | Low-quality    | Genome-fragment | 5.38            | 0     |       |
| S5_vs_k141_142295[full]     | 1013   | No  | NA | 0     | 0  | Not-determined | Genome-fragment | NA              | 0     |       |
| S5_vs_k141_1471[full]       | 2992   | No  | NA | 0     | 2  | Not-determined | Genome-fragment | NA              | 0     |       |
| S3_extracted_k141_31863     | 1917   | No  | NA | 2     | 0  | Low-quality    | Genome-fragment | 3.64            | 0     |       |
| S5_vs_k141_45657[full]      | 1116   | No  | NA | 0     | 1  | Not-determined | Genome-fragment | NA              | 0     |       |
| S5_vs_k141_26196[full]      | 3619   | No  | NA | 0     | 1  | Not-determined | Genome-fragment | NA              | 0     |       |
| S5_vs_k141_115626[full]     | 1917   | No  | NA | 0     | 1  | Low-quality    | Genome-fragment | 5.02            | 0     |       |
| S5_vs_k141_142326[full]     | 3653   | No  | NA | 0     | 2  | Not-determined | Genome-fragment | NA              | 0     |       |
| S5_vs_k141_4212[full]       | 2030   | No  | NA | 0     | 1  | Not-determined | Genome-fragment | NA              | 0     |       |
| S5_vs_k141_87590[full]      | 4848   | No  | NA | 0     | 3  | Not-determined | Genome-fragment | NA              | 0     |       |
| S16_vs_87868[full]          | 1917   | No  | NA | 0     | 1  | Low-quality    | Genome-fragment | 5.77            | 0     |       |
| S6_vs_k141_38340[full]      | 1917   | No  | NA | 0     | 2  | Low-quality    | Genome-fragment | 0.56            | 0     |       |
| S5_vs_k141_142361[full]     | 1692   | No  | NA | 0     | 0  | Not-determined | Genome-fragment | NA              | 0     |       |
| S5_vs_k141_33846[full]      | 2277   | No  | NA | 0     | 2  | Not-determined | Genome-fragment | NA              | 0     |       |
| S5_vs_k141_130541[full]     | 2829   | No  | NA | 0     | 3  | Not-determined | Genome-fragment | NA              | 0     |       |
| S5_vs_k141_107005[full]     | 1174   | No  | NA | 0     | 1  | Not-determined | Genome-fragment | NA              | 0     |       |
| S8_vs_k141_103154[full]     | 1917   | Yes | NA | 1473  | 1  | Low-quality    | Genome-fragment | 0.86            | 21.6  |       |
| S1_vs_k141_8460[full]       | 1918   | No  | NA | 5     | 0  | Low-quality    | Genome-fragment | 2.88            | 0     |       |
| S5_vs_k141_112395[full]     | 3809   | No  | NA | 0     | 3  | Not-determined | Genome-fragment | NA              | 0     |       |
| S5_vs_k141_52285[full]      | 2201   | No  | NA | 0     | 2  | Not-determined | Genome-fragment | NA              | 0     |       |
| S5_extracted_k141_64666     | 1918   | No  | NA | 2     | 0  | Low-quality    | Genome-fragment | 4.48            | 0     |       |
| S5_vs_k141_4298[full]       | 1669   | No  | NA | 0     | 2  | Not-determined | Genome-fragment | NA              | 0     |       |
| S7_vs_88905[full]           | 1918   | No  | NA | 0     | 0  | Low-quality    | Genome-fragment | 4.39            | 0     |       |
| S10_vs_7686[full]           | 1918   | No  | NA | 2     | 0  | Low-quality    | Genome-fragment | 5.49            | 0     |       |
| S10_vs_88082[full]          | 1918   | No  | NA | 0     | 1  | Low-quality    | Genome-fragment | 1.25            | 0     |       |
| S8_vs_k141_5109[full]       | 1918   | No  | NA | 1     | 0  | Low-quality    | Genome-fragment | 3.72            | 0     |       |
| S1_extracted_k141_27004     | 1919   | No  | NA | 0     | 0  | Low-quality    | Genome-fragment | 2.38            | 0     |       |
| S5_vs_k141_142430[full]     | 3131   | No  | NA | 0     | 3  | Not-determined | Genome-fragment | NA              | 0     |       |
| S7_vs_120954[full]          | 1919   | No  | NA | 1     | 0  | Low-quality    | Genome-fragment | 4.14            | 0     |       |
| S16_vs_150853[full]         | 1919   | No  | NA | 0     | 0  | Low-quality    | Genome-fragment | 4.53            | 0     |       |
| S5_vs_k141_4368[full]       | 2981   | No  | NA | 0     | 0  | Not-determined | Genome-fragment | NA              | 0     |       |
| S5_vs_k141_74726[full]      | 1206   | No  | NA | 0     | 1  | Not-determined | Genome-fragment | NA              | 0     |       |
| S10_extracted_25361         | 1919   | No  | NA | 0     | 0  | Low-quality    | Genome-fragment | 1.74            | 0     |       |
| S5_vs_k141_107105[full]     | 26809  | No  | NA | 16    | 1  | Medium-quality | Genome-fragment | 89.33           | 0     |       |
| S5_vs_k141_142450[full]     | 1654   | No  | NA | 6     | 0  | Medium-quality | Genome-fragment | 68.89           | 0     |       |
| S5_vs_k141_14738[full]      | 1515   | No  | NA | 0     | 2  | Not-determined | Genome-fragment | NA              | 0     |       |
| S5_vs_k141_133795[full]     | 1664   | No  | NA | 0     | 1  | Not-determined | Genome-fragment | NA              | 0     |       |
| S6_vs_k141_46404[1/2]gene   | 1919   | No  | NA | 1     | 0  | Low-quality    | Genome-fragment | 3.58            | 0     |       |
| S17_vs_k141_31819[full]     | 1920   | No  | NA | 1     | 0  | Low-quality    | Genome-fragment | 3.47            | 0     |       |
| S11_vs_k141_56170[full]     | 1920   | No  | NA | 0     | 0  | Low-quality    | Genome-fragment | 2.56            | 0     |       |
| S5_vs_k141_9915[full]       | 2026   | No  | NA | 0     | 0  | Not-determined | Genome-fragment | NA              | 0     |       |
| S11_vs_k141_43610[full]     | 1920   | No  | NA | 3     | 0  | Low-quality    | Genome-fragment | 4.34            | 0     |       |
| S5_vs_k141_107139[full]     | 2073   | No  | NA | 0     | 2  | Not-determined | Genome-fragment | NA              | 0     |       |
| S14_vs_k141_20374[full]     | 1920   | No  | NA | 1     | 0  | Low-quality    | Genome-fragment | 4.51            | 0     |       |
| S5_vs_k141_99122[full]      | 1920   | No  | NA | 0     | 0  | Low-quality    | Genome-fragment | 4.88            | 0     |       |
| S5_vs_k141_15505[full]      | 3164   | No  | NA | 0     | 1  | Not-determined | Genome-fragment | NA              | 0     |       |
| S5_vs_k141_15508[full]      | 1715   | No  | NA | 0     | 0  | Not-determined | Genome-fragment | NA              | 0     |       |
| S16_extracted_138838        | 1920   | No  | NA | 0     | 0  | Low-quality    | Genome-fragment | 2.06            | 0     |       |
| S16_vs_126813[full]         | 1920   | No  | NA | 0     | 0  | Low-quality    | Genome-fragment | 2.63            | 0     |       |
| S5_vs_k141_87766[full]      | 6397   | No  | NA | 0     | 4  | Not-determined | Genome-fragment | NA              | 0     |       |
| S16_vs_165674[full]         | 1920   | Yes | NA | 768   | 1  | Low-quality    | Genome-fragment | 0.97            | 60    |       |
| S5_vs_k141_130765[full]     | 1062   | No  | NA | 0     | 1  | Not-determined | Genome-fragment | NA              | 0     |       |
| S11_vs_k141_76807[full]     | 1921   | No  | NA | 3     | 0  | Low-quality    | Genome-fragment | 4.38            | 0     |       |
| S5_vs_k141_46106[full]      | 1921   | No  | NA | 0     | 0  | Low-quality    | Genome-fragment | 3.57            | 0     |       |
| S5_vs_k141_52488[full]      | 1264   | No  | NA | 0     | 0  | Not-determined | Genome-fragment | NA              | 0     |       |
| S5_vs_k141_3073[full]       | 1926   | No  | NA | 0     | 0  | Not-determined | Genome-fragment | NA              | 0     |       |
| S5_vs_k141_112450[full]     | 1463   | No  | NA | 0     | 2  | Not-determined | Genome-fragment | NA              | 0     |       |
| S7_vs_9759[full]            | 1921   | No  | NA | 1     | 0  | Low-quality    | Genome-fragment | 4.45            | 0     |       |
| S5_vs_k141_99224[full]      | 1920   | No  | NA | 0     | 1  | Not-determined | Genome-fragment | NA              | 0     |       |
| S7_vs_89886[full]           | 1921   | No  | NA | 0     | 0  | Low-quality    | Genome-fragment | 4.33            | 0     |       |
| S5_vs_k141_87830[full]      | 19755  | No  | NA | 0     | 13 | Not-determined | Genome-fragment | NA              | 0     |       |
| S8_vs_k141_108206[full]     | 1921   | No  | NA | 2     | 1  | Low-quality    | Genome-fragment | 5.4             | 0     |       |
| S17_extracted_k141_39793    | 1922   | No  | NA | 0     | 0  | Low-quality    | Genome-fragment | 0.64            | 0     |       |
| S9_extracted_k141_48488     | 1922   | No  | NA | 1     | 0  | Low-quality    | Genome-fragment | 2.96            | 0     |       |
| S9_vs_k141_3459[full]       | 1922   | No  | NA | 2     | 0  | Low-quality    | Genome-fragment | 5.35            | 0     |       |
| S1_vs_k141_36613[1/2]gene   | 1922   | No  | NA | 0     | 0  | Low-quality    | Genome-fragment | 5.15            | 0     |       |
| S7_vs_64669[full]           | 1922   | No  | NA | 0     | 0  | Low-quality    | Genome-fragment | 4.51            | 0     |       |
| S5_vs_k141_39339[full]      | 2501   | No  | NA | 0     | 2  | Not-determined | Genome-fragment | NA              | 0     |       |
| S5_vs_k141_112452[full]     | 23378  | No  | NA | 22    | 1  | Medium-quality | Genome-fragment | 63.62           | 0     |       |
| S5_vs_k141_80744[full]      | 3002   | No  | NA | 0     | 1  | Not-determined | Genome-fragment | NA              | 0     |       |
| S7_vs_95713[full]           | 1922   | No  | NA | 1     | 0  | Low-quality    | Genome-fragment | 4.71            | 0     |       |
| S10_vs_102488[full]         | 1922   | No  | NA | 0     | 3  | Low-quality    | Genome-fragment | 0.76            | 0     |       |
| S12_vs_k141_652597[full]    | 1922   | No  | NA | 1     | 0  | Low-quality    | Genome-fragment | 3.37            | 0     |       |
| S5_vs_k141_112470[full]     | 2332   | No  | NA | 0     | 1  | Not-determined | Genome-fragment | NA              | 0     |       |
| S4_extracted_5586           | 1922   | No  | NA | 0     | 0  | Low-quality    | Genome-fragment | 3.16            | 0     |       |
| S6_vs_k141_3601[full]       | 1922   | No  | NA | 2     | 0  | Low-quality    | Genome-fragment | 4.21            | 0     |       |
| S5_vs_k141_125594[full]     | 1118   | No  | NA | 0     | 0  | Not-determined | Genome-fragment | NA              | 0     |       |
| S5_vs_k141_112496[full]     | 1997   | No  | NA | 0     | 2  | Not-determined | Genome-fragment | NA              | 0     |       |
| S5_vs_k141_69751[full]      | 3407   | No  | NA | 0     | 0  | Not-determined | Genome-fragment | NA              | 0     |       |
| S17_vs_k141_134773[full]    | 1923   | No  | NA | 0     | 0  | Low-quality    | Genome-fragment | 4.22            | 0     |       |
| S9_vs_k141_26879[full]      | 1923   | No  | NA | 0     | 0  | Low-quality    | Genome-fragment | 4.41            | 0     |       |
| S11_vs_k141_69615[full]     |        |     |    |       |    |                |                 |                 |       |       |



|                           |           |       |     |       |    |    |                |                 |       |       |
|---------------------------|-----------|-------|-----|-------|----|----|----------------|-----------------|-------|-------|
| S12_vs_k141_154626        | [full]    | 1924  | No  | NA    | 2  | 0  | Low-quality    | Genome-fragment | 2.73  | 0     |
| S15_vs_k141_19647         | [full]    | 1924  | No  | NA    | 1  | 0  | Low-quality    | Genome-fragment | 1.17  | 0     |
| S5_vs_k141_15596          | [full]    | 2929  | No  | NA    | 0  | 2  | Not-determined | Genome-fragment | NA    | 0     |
| S8_vs_k141_95567          | [full]    | 1924  | No  | NA    | 0  | 2  | Low-quality    | Genome-fragment | 1.07  | 0     |
| S17_vs_k141_16177         | [full]    | 1925  | No  | NA    | 0  | 2  | Low-quality    | Genome-fragment | 0.73  | 0     |
| S11_vs_k141_56670         | [full]    | 1925  | No  | NA    | 0  | 0  | Low-quality    | Genome-fragment | 4.87  | 0     |
| S5_vs_k141_94497          | [full]    | 1298  | No  | NA    | 0  | 0  | Not-determined | Genome-fragment | NA    | 0     |
| S5_vs_k141_52696          | [full]    | 3987  | No  | NA    | 0  | 1  | Not-determined | Genome-fragment | NA    | 0     |
| S5_vs_k141_135986         | [full]    | 1030  | No  | NA    | 0  | 0  | Not-determined | Genome-fragment | NA    | 0     |
| S1_vs_k141_16820          | [full]    | 1925  | No  | NA    | 3  | 0  | Low-quality    | Genome-fragment | 4.39  | 0     |
| S7_vs_118650              | [full]    | 1925  | No  | NA    | 3  | 0  | Low-quality    | Genome-fragment | 3.16  | 0     |
| S5_vs_k141_24260          | [full]    | 2302  | No  | NA    | 0  | 1  | Not-determined | Genome-fragment | NA    | 0     |
| S5_vs_k141_63924          | [full]    | 35637 | No  | NA    | 24 | 0  | High-quality   | High-quality    | 100   | 0     |
| S7_vs_125548              | [full]    | 1925  | No  | NA    | 3  | 0  | Low-quality    | Genome-fragment | 4.23  | 0     |
| S16_vs_115441             | [full]    | 1925  | No  | NA    | 0  | 2  | Low-quality    | Genome-fragment | 0.52  | 0     |
| S5_vs_k141_14263          | [full]    | 3159  | No  | NA    | 0  | 2  | Not-determined | Genome-fragment | NA    | 0     |
| S5_vs_k141_9745           | [full]    | 1767  | No  | NA    | 0  | 2  | Not-determined | Genome-fragment | NA    | 0     |
| S8_extracted_k141_40516   | [full]    | 1925  | No  | NA    | 0  | 0  | Low-quality    | Genome-fragment | 2.86  | 0     |
| S5_vs_k141_125828         | [full]    | 1065  | No  | NA    | 0  | 1  | Not-determined | Genome-fragment | NA    | 0     |
| S14_vs_k141_74195         | [full]    | 1926  | No  | NA    | 0  | 0  | Low-quality    | Genome-fragment | 2.75  | 0     |
| S5_vs_k141_69869          | [full]    | 3063  | No  | NA    | 0  | 1  | Not-determined | Genome-fragment | NA    | 0     |
| S14_vs_k141_74075         | [full]    | 1926  | No  | NA    | 0  | 1  | Low-quality    | Genome-fragment | 3.22  | 0     |
| S7_vs_13716               | [full]    | 1926  | No  | NA    | 1  | 0  | Low-quality    | Genome-fragment | 3.87  | 0     |
| S16_vs_47661              | [full]    | 1926  | No  | NA    | 0  | 1  | Low-quality    | Genome-fragment | 0.91  | 0     |
| S5_vs_k141_107532         | [full]    | 1796  | No  | NA    | 0  | 3  | Not-determined | Genome-fragment | NA    | 0     |
| S5_vs_k141_107534         | [full]    | 1143  | No  | NA    | 0  | 2  | Not-determined | Genome-fragment | NA    | 0     |
| S5_vs_k141_94536          | [full]    | 1313  | No  | NA    | 0  | 2  | Not-determined | Genome-fragment | NA    | 0     |
| S8_extracted_k141_93562   | [full]    | 1926  | No  | NA    | 1  | 0  | Low-quality    | Genome-fragment | 5.44  | 0     |
| S9_vs_k141_55915          | [full]    | 1927  | No  | NA    | 0  | 0  | Low-quality    | Genome-fragment | 2.16  | 0     |
| S5_vs_k141_99449          | [full]    | 2210  | No  | NA    | 0  | 1  | Not-determined | Genome-fragment | NA    | 0     |
| S5_vs_k141_94544          | [full]    | 1095  | No  | NA    | 0  | 0  | Not-determined | Genome-fragment | NA    | 0     |
| S5_vs_k141_130958         | [full]    | 36390 | No  | NA    | 15 | 1  | Medium-quality | Genome-fragment | 65.93 | 0     |
| S3_vs_k141_68350          | [full]    | 1927  | No  | NA    | 0  | 0  | Low-quality    | Genome-fragment | 3.92  | 0     |
| S5_vs_k141_56677          | [full]    | 2582  | No  | NA    | 0  | 1  | Not-determined | Genome-fragment | NA    | 0     |
| S5_vs_k141_14322          | [full]    | 2879  | No  | NA    | 0  | 0  | Not-determined | Genome-fragment | NA    | 0     |
| S16_extracted_15182       | [full]    | 1927  | No  | NA    | 0  | 0  | Low-quality    | Genome-fragment | 1.51  | 0     |
| S5_vs_k141_9747           | [full]    | 64417 | Yes | 46640 | 13 | 5  | High-quality   | High-quality    | 100   | 27.62 |
| S5_vs_k141_93566          | [full]    | 1117  | No  | NA    | 0  | 2  | Not-determined | Genome-fragment | NA    | 0     |
| S5_vs_k141_39570          | [full]    | 3208  | No  | NA    | 0  | 1  | Not-determined | Genome-fragment | NA    | 0     |
| S16_vs_97578              | [full]    | 1927  | No  | NA    | 0  | 0  | Low-quality    | Genome-fragment | 4.43  | 0     |
| S12_vs_k141_102478        | [full]    | 1927  | No  | NA    | 0  | 0  | Low-quality    | Genome-fragment | 5.21  | 0     |
| S12_vs_k141_143566        | [full]    | 1927  | No  | NA    | 0  | 0  | Low-quality    | Genome-fragment | 2.47  | 0     |
| S12_vs_k141_177496        | [full]    | 1927  | No  | NA    | 4  | 0  | Low-quality    | Genome-fragment | 4.78  | 0     |
| S12_vs_k141_47172         | [full]    | 1927  | No  | NA    | 0  | 0  | Low-quality    | Genome-fragment | 3.99  | 0     |
| S5_vs_k141_95510          | [full]    | 1154  | No  | NA    | 0  | 0  | Not-determined | Genome-fragment | NA    | 0     |
| S9_vs_k141_43567          | [full]    | 1928  | No  | NA    | 0  | 0  | Low-quality    | Genome-fragment | 4.38  | 0     |
| S5_vs_k141_34375          | [full]    | 2450  | No  | NA    | 0  | 2  | Not-determined | Genome-fragment | NA    | 0     |
| S5_vs_k141_93610          | [full]    | 1223  | No  | NA    | 0  | 1  | Not-determined | Genome-fragment | NA    | 0     |
| S5_vs_k141_80842          | [full]    | 4444  | No  | NA    | 0  | 0  | Not-determined | Genome-fragment | NA    | 0     |
| S5_vs_k141_4737           | [full]    | 37808 | No  | NA    | 15 | 1  | Medium-quality | Genome-fragment | 63.15 | 0     |
| S5_vs_k141_130971         | [full]    | 4580  | No  | NA    | 0  | 2  | Not-determined | Genome-fragment | NA    | 0     |
| S6_vs_k141_24002          | [full]    | 1928  | No  | NA    | 0  | 0  | Low-quality    | Genome-fragment | 3.16  | 0     |
| S5_vs_k141_52796          | [full]    | 13838 | No  | NA    | 0  | 11 | Not-determined | Genome-fragment | NA    | 0     |
| S17_vs_k141_74691         | [full]    | 1929  | No  | NA    | 0  | 2  | Low-quality    | Genome-fragment | 0.63  | 0     |
| S9_vs_k141_62323          | [full]    | 1929  | No  | NA    | 0  | 0  | Low-quality    | Genome-fragment | 3.63  | 0     |
| S11_vs_k141_43636         | [full]    | 1929  | No  | NA    | 0  | 0  | Low-quality    | Genome-fragment | 2.22  | 0     |
| S5_vs_k141_125976         | [full]    | 3063  | No  | NA    | 0  | 1  | Not-determined | Genome-fragment | NA    | 0     |
| S5_vs_k141_5822           | [full]    | 9698  | No  | NA    | 0  | 1  | Not-determined | Genome-fragment | NA    | 0     |
| S14_vs_k141_97841         | [full]    | 1929  | No  | NA    | 0  | 0  | Low-quality    | Genome-fragment | 2.59  | 0     |
| S5_vs_k141_88207          | [full]    | 12966 | No  | NA    | 0  | 7  | Not-determined | Genome-fragment | NA    | 0     |
| S5_extracted_k141_137361  | [full]    | 1929  | No  | NA    | 0  | 1  | Low-quality    | Genome-fragment | 1.43  | 0     |
| S5_vs_k141_2825           | [in2gene] | 1929  | No  | NA    | 0  | 0  | Low-quality    | Genome-fragment | 3.04  | 0     |
| S7_vs_116771              | [full]    | 1929  | No  | NA    | 0  | 0  | Low-quality    | Genome-fragment | 4.92  | 0     |
| S5_vs_k141_34429          | [full]    | 3500  | No  | NA    | 0  | 2  | Not-determined | Genome-fragment | NA    | 0     |
| S17_vs_k141_164861        | [full]    | 1930  | No  | NA    | 0  | 0  | Low-quality    | Genome-fragment | 3.39  | 0     |
| S9_extracted_k141_64838   | [full]    | 1930  | No  | NA    | 0  | 0  | Low-quality    | Genome-fragment | 1.11  | 0     |
| S9_extracted_k141_4979    | [full]    | 1930  | No  | NA    | 0  | 0  | Low-quality    | Genome-fragment | 1.74  | 0     |
| S5_vs_k141_74824          | [full]    | 1691  | No  | NA    | 0  | 1  | Not-determined | Genome-fragment | NA    | 0     |
| S5_vs_k141_5871           | [full]    | 1515  | No  | NA    | 0  | 0  | Not-determined | Genome-fragment | NA    | 0     |
| S5_vs_k141_94631          | [full]    | 1615  | No  | NA    | 0  | 2  | Not-determined | Genome-fragment | NA    | 0     |
| S7_extracted_21341        | [full]    | 1930  | No  | NA    | 1  | 0  | Low-quality    | Genome-fragment | 3.26  | 0     |
| S5_vs_k141_64026          | [full]    | 2516  | No  | NA    | 1  | 1  | Not-determined | Genome-fragment | NA    | 0     |
| S5_vs_k141_34472          | [full]    | 1100  | No  | NA    | 0  | 0  | Not-determined | Genome-fragment | NA    | 0     |
| S5_vs_k141_64034          | [full]    | 1759  | No  | NA    | 0  | 3  | Not-determined | Genome-fragment | NA    | 0     |
| S16_vs_11728              | [full]    | 1930  | No  | NA    | 0  | 0  | Low-quality    | Genome-fragment | 2.33  | 0     |
| S5_vs_k141_107642         | [full]    | 1620  | No  | NA    | 0  | 0  | Not-determined | Genome-fragment | NA    | 0     |
| S5_vs_k141_64041          | [full]    | 2383  | No  | NA    | 0  | 1  | Not-determined | Genome-fragment | NA    | 0     |
| S16_vs_130474             | [full]    | 1930  | No  | NA    | 2  | 0  | Low-quality    | Genome-fragment | 4.75  | 0     |
| S8_vs_k141_14277          | [full]    | 1930  | No  | NA    | 0  | 0  | Low-quality    | Genome-fragment | 4.7   | 0     |
| S5_vs_k141_80911          | [full]    | 36909 | No  | NA    | 19 | 0  | High-quality   | High-quality    | 93.74 | 0     |
| S5_vs_k141_112929         | [full]    | 4817  | No  | NA    | 0  | 5  | Not-determined | Genome-fragment | NA    | 0     |
| S5_vs_k141_80916          | [full]    | 1336  | No  | NA    | 0  | 0  | Not-determined | Genome-fragment | NA    | 0     |
| S13_vs_32966              | [full]    | 1931  | No  | NA    | 2  | 0  | Low-quality    | Genome-fragment | 4.97  | 0     |
| S14_vs_k141_5091          | [full]    | 1931  | No  | NA    | 0  | 0  | Low-quality    | Genome-fragment | 2.33  | 0     |
| S5_vs_k141_107658         | [full]    | 1257  | No  | NA    | 0  | 2  | Not-determined | Genome-fragment | NA    | 0     |
| S7_vs_91997               | [full]    | 1931  | No  | NA    | 0  | 0  | Low-quality    | Genome-fragment | 1.25  | 0     |
| S3_vs_k141_124978         | [full]    | 1932  | No  | NA    | 0  | 0  | Low-quality    | Genome-fragment | 1.37  | 0     |
| S7_extracted_25376        | [full]    | 1932  | No  | NA    | 0  | 0  | Low-quality    | Genome-fragment | 0.23  | 0     |
| S7_vs_67540               | [full]    | 1932  | No  | NA    | 0  | 0  | Low-quality    | Genome-fragment | 5.18  | 0     |
| S5_vs_k141_99616          | [full]    | 1462  | No  | NA    | 0  | 1  | Not-determined | Genome-fragment | NA    | 0     |
| S5_vs_k141_64074          | [full]    | 2118  | No  | NA    | 0  | 1  | Not-determined | Genome-fragment | NA    | 0     |
| S5_vs_k141_14563          | [full]    | 2553  | No  | NA    | 0  | 0  | Not-determined | Genome-fragment | NA    | 0     |
| S16_vs_172373             | [full]    | 1932  | No  | NA    | 0  | 0  | Low-quality    | Genome-fragment | 2.14  | 0     |
| S5_vs_k141_21681          | [full]    | 2030  | No  | NA    | 0  | 0  | Not-determined | Genome-fragment | NA    | 0     |
| S10_vs_61009              | [full]    | 1932  | No  | NA    | 0  | 1  | Low-quality    | Genome-fragment | 1.35  | 0     |
| S12_extracted_k141_178033 | [full]    | 1932  | No  | NA    | 0  | 0  | Low-quality    | Genome-fragment | 1.41  | 0     |
| S2_vs_k141_13777          | [full]    | 1932  | No  | NA    | 1  | 0  | Low-quality    | Genome-fragment | 3.15  | 0     |
| S14_vs_k141_36785         | [full]    | 1933  | No  | NA    | 0  | 1  | Low-quality    | Genome-fragment | 3.08  | 0     |
| S5_vs_k141_56849          | [full]    | 2883  | No  | NA    | 1  | 2  | Not-determined | Genome-fragment | NA    | 0     |
| S1_extracted_k141_340879  | [full]    | 1933  | No  | NA    | 1  | 0  | Low-quality    | Genome-fragment | 1.95  | 0     |
| S5_vs_k141_46060          | [full]    | 5459  | No  | NA    | 1  | 2  | Not-determined | Genome-fragment | NA    | 69.39 |
| S3_vs_k141_1011871        | [full]    | 1933  | No  | NA    | 0  | 0  | Low-quality    | Genome-fragment | 4.21  | 0     |
| S5_vs_k141_17769          | [full]    | 1933  | No  | NA    | 0  | 0  | Low-quality    | Genome-fragment | 2.92  | 0     |
| S7_extracted_24485        | [full]    | 1933  | No  | NA    | 0  | 0  | Low-quality    | Genome-fragment | 3.11  | 0     |
| S16_extracted_53974       | [full]    | 1933  | No  | NA    | 0  | 0  | Low-quality    | Genome-fragment | 4.12  | 0     |
| S5_vs_k141_112984         | [full]    | 1163  | No  | NA    | 0  | 1  | Not-determined | Genome-fragment | NA    | 0     |
| S5_vs_k141_69980          | [full]    | 22516 | No  | NA    | 12 | 0  | Medium-quality | Genome-fragment | 57.76 | 0     |
| S16_vs_3677               | [full]    | 1933  | No  | NA    | 0  | 0  | Low-quality    | Genome-fragment | 4.1   | 0     |
| S10_vs_35468              | [full]    | 1933  | No  | NA    | 0  | 0  | Low-quality    | Genome-fragment | NA    | 0     |
| S5_vs_k141_53048          | [full]    | 1138  | No  | NA    | 0  | 0  | Not-determined | Genome-fragment | NA    | 0     |
| S8_extracted_k141_114950  | [full]    | 1933  | No  | NA    | 0  | 0  | Low-quality    | Genome-fragment | 2.36  | 0     |
| S17_vs_k141_50602         | [full]    | 1934  | No  | NA    | 0  | 0  | Low-quality    | Genome-fragment | 0.69  | 0     |
| S9_vs_k141_2777           | [in2gene] | 1934  | No  | NA    | 2  | 0  | Low-quality    | Genome-fragment | 5.38  | 0     |
| S3_extracted_k141_77528   | [full]    | 1934  | No  | NA    | 0  | 0  | Low-quality    | Genome-fragment | 4.01  | 0     |
| S5_vs_k141_126122         | [full]    | 1745  | No  | NA    | 0  | 2  | Not-determined | Genome-fragment | NA    | 0     |
| S5_vs_k141_136129         | [full]    | 2000  | No  | NA    | 0  | 1  | Not-determined | Genome-fragment | NA    | 0     |
| S5_vs_k141_126131         | [full]    | 7826  | No  | NA    | 0  | 3  | Not-determined | Genome-fragment | NA    | 0     |
| S5_vs_k141_133028         | [full]    | 1506  | No  | NA    | 0  | 2  | Not-determined | Genome-fragment | NA    | 0     |
| S3_vs_k141_66314          | [full]    | 1934  | No  | NA    | 0  | 0  | Low-quality    | Genome-fragment | 3.55  | 0     |
| S3_vs_k141_123109         | [in2gene] | 1934  | No  | NA    | 2  | 0  | Low-quality    | Genome-fragment | 4.42  | 0     |
| S5_vs_k141_59725          | [full]    | 3236  | No  | NA    | 0  | 0  | Not-determined | Genome-fragment | NA    | 0     |
| S5_vs_k141_131384         | [full]    | 6900  | No  | NA    | 0  | 6  | Not-determined | Genome-fragment | NA    | 0     |
| S10_vs_106453             | [full]    | 1934  | No  | NA    | 0  | 1  | Low-quality    | Genome-fragment | 4.64  | 0     |
| S5_vs_k141_5077           | [full]    | 4986  | No  | NA    | 0  | 2  | Not-determined | Genome-fragment | NA    | 0     |
| S12_extracted_k141_178012 | [full]    | 1934  | No  | NA    | 0  | 0  | Low-quality    | Genome-fragment | 3.2   | 0     |
| S8_vs_k141_80668          | [full]    | 1934  | No  | NA    | 2  | 0  | Low-quality    | Genome-fragment | 3.75  | 0     |
| S5_vs_k141_61488          | [full]    | 2098  | No  | NA    | 0  | 0  | Not-determined | Genome-fragment | NA    | 0     |
| S8_vs_k141_20037          | [full]    | 1934  | No  | NA    | 0  | 2  | Low-quality    | Genome-fragment | 6.18  | 0     |
| S17_vs_k141_105844        | [full]    | 1935  | No  | NA    | 0  | 0  | Low-quality    | Genome-fragment | 3.23  | 0     |
| S5_vs_k141_34722          | [full]    | 1553  | No  | NA    | 0  | 0  | Not-determined | Genome-fragment | NA    | 0     |
| S3_extracted_k141_59766   | [full]    | 1935  | No  | NA    | 0  | 0  | Low-quality    | Genome-fragment | 3.87  | 0     |
| S5_vs_k141_29753          | [in2gene] | 1935  | No  | NA    | 2  | 0  | Low-quality    | Genome-fragment | 4.03  | 0     |
| S7_vs_126702              | [full]    | 1935  | No  | NA    | 2  | 0  | Low-quality    | Genome-fragment | 3.03  | 0     |
| S5_vs_k141_64195          | [full]    | 1405  | No  | NA    | 0  | 2  | Not-determined | Genome-fragment | NA    | 0     |
| S5_vs_k141_136185         | [full]    | 2423  | No  | NA    | 0  | 0  | Not-determined | Genome-fragment | NA    | 0     |
| S7_vs_136749              | [full]    | 1935  | No  | NA    | 0  | 0  | Low-quality    | Genome-fragment | 3.64  | 0     |
| S5_vs_k141_33113          | [full]    | 9934  | No  | NA    | 0  | 4  | Not-determined | Genome-fragment | NA    | 0     |



|                          |          |       |     |       |    |          |                |                 |       |       |
|--------------------------|----------|-------|-----|-------|----|----------|----------------|-----------------|-------|-------|
| SS_vs_k141_39721         | [full]   | 1996  | No  | NA    | 0  | 2        | Not-determined | Genome-fragment | NA    | 0     |
| SS_vs_k141_107968        | [full]   | 3545  | No  | NA    | 0  | 1        | Not-determined | Genome-fragment | NA    | 0     |
| SS_vs_k141_39741         | [full]   | 1223  | No  | NA    | 0  | 1        | Not-determined | Genome-fragment | NA    | 0     |
| SS_vs_18225              | [full]   | 1938  | No  | NA    | 1  | 0        | Low-quality    | Genome-fragment | 2.4   | 0     |
| SS_vs_k141_12851         | [full]   | 1938  | No  | NA    | 0  | 0        | Low-quality    | Genome-fragment | 4.09  | 0     |
| SS_vs_k141_116342        | [full]   | 8562  | No  | NA    | 0  | 3        | Not-determined | Genome-fragment | NA    | 0     |
| SS_extracted_k141_80781  |          | 1939  | No  | NA    | 1  | 0        | Low-quality    | Genome-fragment | 8.84  | 0     |
| SS_vs_k141_113187        | [full]   | 2155  | No  | NA    | 0  | 1        | Not-determined | Genome-fragment | NA    | 0     |
| SS_vs_k141_99862         | [full]   | 1539  | No  | NA    | 0  | 2        | Not-determined | Genome-fragment | NA    | 0     |
| SS_vs_153946             | [full]   | 1939  | No  | NA    | 3  | 0        | Low-quality    | Genome-fragment | 4.22  | 0     |
| SS_vs_k141_104140        | [full]   | 1939  | No  | NA    | 3  | 0        | Low-quality    | Genome-fragment | 3.51  | 0     |
| SS_vs_k141_12551         | [full]   | 1939  | No  | NA    | 0  | 0        | Low-quality    | Genome-fragment | 3.03  | 0     |
| SS_vs_k141_15193         | [full]   | 1939  | No  | NA    | 0  | 0        | Low-quality    | Genome-fragment | 4.83  | 0     |
| SS_extracted_k141_30984  |          | 1940  | Yes | 646   | 1  | 2        | Low-quality    | Genome-fragment | 0.93  | 66.7  |
| SS_vs_k141_39790         | [full]   | 1332  | No  | NA    | 0  | 2        | Not-determined | Genome-fragment | NA    | 0     |
| SS_vs_k141_6148          | [full]   | 1940  | No  | NA    | 1  | 0        | Low-quality    | Genome-fragment | 0.81  | 0     |
| SS_vs_k141_11855         | [full]   | 1477  | No  | NA    | 0  | 2        | Not-determined | Genome-fragment | NA    | 0     |
| SS_extracted_k141_132007 |          | 1940  | No  | NA    | 1  | 0        | Low-quality    | Genome-fragment | 3.38  | 0     |
| SS_extracted_k141_122396 |          | 1940  | No  | NA    | 1  | 0        | Low-quality    | Genome-fragment | 1.09  | 0     |
| SS_vs_k141_119866        | [full]   | 1227  | No  | NA    | 0  | 1        | Not-determined | Genome-fragment | NA    | 0     |
| SS_vs_k141_16142         | [full]   | 3345  | No  | NA    | 0  | 1        | Not-determined | Genome-fragment | NA    | 0     |
| SS_vs_k141_19679         | [full]   | 1940  | No  | NA    | 1  | 0        | Low-quality    | Genome-fragment | 0.16  | 0     |
| SS_vs_k141_108040        | [full]   | 1016  | No  | NA    | 0  | 0        | Not-determined | Genome-fragment | NA    | 0     |
| SS_extracted_k141_45599  |          | 1940  | No  | NA    | 3  | 0        | Low-quality    | Genome-fragment | 5.17  | 0     |
| SS_extracted_9058        |          | 1940  | No  | NA    | 0  | 0        | Low-quality    | Genome-fragment | 1.33  | 0     |
| SS_vs_k141_185338        | [full]   | 1940  | No  | NA    | 0  | 0        | Low-quality    | Genome-fragment | 3     | 0     |
| SS_vs_k141_17067         | [full]   | 2396  | No  | NA    | 0  | 3        | Not-determined | Genome-fragment | NA    | 0     |
| SS_vs_k141_142954        | [full]   | 2609  | No  | NA    | 0  | 3        | Not-determined | Genome-fragment | NA    | 0     |
| SS_vs_k141_95155         | [full]   | 2078  | No  | NA    | 0  | 0        | Not-determined | Genome-fragment | NA    | 0     |
| SS_vs_11255              | [full]   | 1940  | No  | NA    | 0  | 0        | Low-quality    | Genome-fragment | 4.84  | 0     |
| SS_extracted_k141_86777  |          | 1940  | No  | NA    | 0  | 2        | Low-quality    | Genome-fragment | 0.85  | 0     |
| SS_extracted_k141_65099  |          | 1941  | No  | NA    | 0  | 0        | Low-quality    | Genome-fragment | 6.4   | 0     |
| SS_vs_k141_15455         | [full]   | 1941  | No  | NA    | 0  | 1        | Low-quality    | Genome-fragment | 4.29  | 0     |
| SS_vs_k141_14914         | [full]   | 1370  | No  | NA    | 0  | 1        | Not-determined | Genome-fragment | NA    | 0     |
| SS_vs_k141_12414         | [full]   | 1941  | No  | NA    | 0  | 0        | Low-quality    | Genome-fragment | 4.9   | 0     |
| SS_extracted_k141_39723  |          | 1941  | No  | NA    | 0  | 0        | Low-quality    | Genome-fragment | 4.12  | 0     |
| SS_vs_k141_10244         | [full]   | 1490  | No  | NA    | 0  | 0        | Not-determined | Genome-fragment | NA    | 0     |
| SS_vs_91634              | [full]   | 1941  | No  | NA    | 1  | 0        | Low-quality    | Genome-fragment | 4.07  | 0     |
| SS_extracted_163570      |          | 1941  | No  | NA    | 1  | 1        | Low-quality    | Genome-fragment | 0.7   | 0     |
| SS_vs_k141_15059         | [full]   | 1941  | No  | NA    | 0  | 0        | Low-quality    | Genome-fragment | 2.95  | 0     |
| SS_vs_k141_16651         | [full]   | 5427  | No  | NA    | 0  | 4        | Not-determined | Genome-fragment | NA    | 0     |
| SS_vs_k141_11208         | [full]   | 3336  | No  | NA    | 0  | 2        | Not-determined | Genome-fragment | NA    | 0     |
| SS_vs_k141_81215         | [full]   | 2268  | No  | NA    | 0  | 0        | Not-determined | Genome-fragment | NA    | 0     |
| SS_vs_k141_15450         | [full]   | 1728  | No  | NA    | 0  | 2        | Not-determined | Genome-fragment | NA    | 0     |
| SS_vs_k141_17511         | [full]   | 1719  | No  | NA    | 0  | 0        | Not-determined | Genome-fragment | NA    | 0     |
| SS_vs_k141_13628         | [full]   | 1941  | No  | NA    | 0  | 0        | Low-quality    | Genome-fragment | 4.7   | 0     |
| SS_vs_k141_136734        | [full]   | 1942  | No  | NA    | 0  | 0        | Low-quality    | Genome-fragment | 3.38  | 0     |
| SS_vs_k141_135840        | [full]   | 1942  | No  | NA    | 0  | 1        | Low-quality    | Genome-fragment | 7     | 0     |
| SS_vs_k141_61231         | [full]   | 2698  | No  | NA    | 0  | 1        | Not-determined | Genome-fragment | NA    | 0     |
| SS_vs_k141_39889         | [full]   | 1726  | No  | NA    | 0  | 0        | Not-determined | Genome-fragment | NA    | 0     |
| SS_vs_k141_17605         | [full]   | 1942  | No  | NA    | 2  | 0        | Low-quality    | Genome-fragment | 3.52  | 0     |
| SS_vs_k141_131242        | [full]   | 2812  | No  | NA    | 0  | 2        | Not-determined | Genome-fragment | NA    | 0     |
| SS_vs_k141_88794         | [full]   | 1081  | No  | NA    | 0  | 0        | Not-determined | Genome-fragment | NA    | 0     |
| SS_extracted_k141_24201  |          | 1942  | No  | NA    | 0  | 0        | Low-quality    | Genome-fragment | 1.27  | 0     |
| SS_vs_k141_64380         | [full]   | 5051  | No  | NA    | 0  | 3        | Not-determined | Genome-fragment | NA    | 0     |
| SS_vs_k141_10314         | [full]   | 2405  | No  | NA    | 0  | 0        | Not-determined | Genome-fragment | NA    | 0     |
| SS_vs_k141_15443         | [full]   | 1942  | No  | 1762  | 1  | 1        | Low-quality    | Genome-fragment | 2.96  | 9.27  |
| SS_vs_k141_10165         | [full]   | 1942  | No  | NA    | 0  | 0        | Low-quality    | Genome-fragment | 3.31  | 0     |
| SS_vs_k141_66352         | [full]   | 1942  | No  | NA    | 0  | 0        | Low-quality    | Genome-fragment | 2.79  | 0     |
| SS_vs_k141_101783        | [full]   | 1943  | No  | NA    | 3  | 0        | Low-quality    | Genome-fragment | 3.98  | 0     |
| SS_vs_k141_11989         | [full]   | 1923  | No  | NA    | 0  | 0        | Not-determined | Genome-fragment | NA    | 0     |
| SS_vs_k141_95264         | [full]   | 1750  | No  | NA    | 0  | 0        | Not-determined | Genome-fragment | NA    | 0     |
| SS_vs_k141_15500         | [full]   | 2820  | No  | NA    | 0  | 2        | Not-determined | Genome-fragment | NA    | 0     |
| SS_vs_k141_15072         | [full]   | 1038  | No  | NA    | 0  | 1        | Not-determined | Genome-fragment | NA    | 0     |
| SS_vs_k141_14415         | [full]   | 4449  | No  | NA    | 0  | 1        | Not-determined | Genome-fragment | NA    | 0     |
| SS_vs_k141_83524         | [full]   | 1943  | No  | NA    | 2  | 0        | Low-quality    | Genome-fragment | 3.94  | 0     |
| SS_vs_k141_15521         | [full]   | 1152  | No  | NA    | 0  | 0        | Not-determined | Genome-fragment | NA    | 0     |
| SS_extracted_14901       |          | 1943  | No  | NA    | 0  | 0        | Low-quality    | Genome-fragment | 1.44  | 0     |
| SS_vs_21638              | [full]   | 1943  | No  | NA    | 0  | 0        | Low-quality    | Genome-fragment | 4.95  | 0     |
| SS_vs_k141_99970         | [full]   | 3809  | No  | NA    | 0  | 1        | Not-determined | Genome-fragment | NA    | 0     |
| SS_vs_k141_120062        | [full]   | 2185  | No  | NA    | 0  | 0        | Not-determined | Genome-fragment | NA    | 0     |
| SS_vs_k141_39945         | [full]   | 1193  | No  | NA    | 0  | 2        | Not-determined | Genome-fragment | NA    | 0     |
| SS_extracted_42603       |          | 1943  | No  | NA    | 0  | 0        | Low-quality    | Genome-fragment | 3.2   | 0     |
| SS_vs_68619              | [full]   | 1943  | No  | NA    | 1  | 0        | Low-quality    | Genome-fragment | 5.69  | 0     |
| SS_vs_k141_108179        | [full]   | 2809  | No  | NA    | 0  | 1        | Not-determined | Genome-fragment | NA    | 0     |
| SS_vs_108044             | [full]   | 1943  | No  | NA    | 1  | 0        | Low-quality    | Genome-fragment | 1.26  | 0     |
| SS_vs_k141_53480         | [full]   | 1196  | No  | NA    | 0  | 0        | Not-determined | Genome-fragment | NA    | 0     |
| SS_vs_k141_17128         | [full]   | 2304  | No  | NA    | 0  | 0        | Not-determined | Genome-fragment | NA    | 0     |
| SS_vs_k141_113886        | [full]   | 2012  | No  | NA    | 12 | 0        | Medium-quality | Genome-fragment | 57.35 | 0     |
| SS_vs_k141_113389        | [full]   | 2213  | No  | NA    | 0  | 3        | Not-determined | Genome-fragment | NA    | 0     |
| SS_vs_10211              | [full]   | 1944  | No  | NA    | 1  | 0        | Low-quality    | Genome-fragment | 6.66  | 0     |
| SS_vs_k141_14406         | [full]   | 1944  | No  | NA    | 1  | 0        | Low-quality    | Genome-fragment | 3.92  | 0     |
| SS_vs_k141_126033        | [full]   | 1944  | No  | NA    | 1  | 0        | Low-quality    | Genome-fragment | 4     | 0     |
| SS_vs_k141_159307        | [full]   | 33203 | No  | NA    | 21 | 0        | Medium-quality | Genome-fragment | 88.67 | 0     |
| SS_vs_k141_15702         | [full]   | 1944  | No  | NA    | 3  | 0        | Low-quality    | Genome-fragment | 5.48  | 0     |
| SS_vs_k141_16258         | [full]   | 1148  | No  | NA    | 0  | 0        | Not-determined | Genome-fragment | NA    | 0     |
| SS_vs_k141_136552        | [full]   | 2268  | No  | NA    | 0  | 0        | Not-determined | Genome-fragment | NA    | 0     |
| SS_extracted_53035       |          | 1944  | No  | NA    | 0  | 2        | Low-quality    | Genome-fragment | 0.52  | 0     |
| SS_vs_k141_141421        | [H2]gene | 1944  | No  | NA    | 0  | 2        | Low-quality    | Genome-fragment | 4.13  | 0     |
| SS_vs_k141_120108        | [full]   | 1662  | No  | NA    | 0  | 0        | Not-determined | Genome-fragment | NA    | 0     |
| SS_vs_k141_15284         | [full]   | 3193  | No  | NA    | 0  | 2        | Not-determined | Genome-fragment | NA    | 0     |
| SS_extracted_k141_95383  |          | 1944  | No  | NA    | 0  | 0        | Low-quality    | Genome-fragment | 1.46  | 0     |
| SS_vs_k141_126723        | [full]   | 2254  | No  | NA    | 0  | 0        | Not-determined | Genome-fragment | NA    | 0     |
| SS_vs_k141_12660         | [full]   | 1944  | No  | NA    | 0  | 2        | Low-quality    | Genome-fragment | 2.8   | 0     |
| SS_extracted_24198       |          | 1945  | No  | NA    | 0  | 0        | Low-quality    | Genome-fragment | 6.04  | 0     |
| SS_extracted_k141_109556 |          | 1945  | No  | NA    | 0  | 0        | Low-quality    | Genome-fragment | 3.05  | 0     |
| SS_vs_k141_120136        | [full]   | 3585  | No  | NA    | 0  | 3        | Not-determined | Genome-fragment | NA    | 0     |
| SS_vs_k141_17203         | [full]   | 3951  | No  | NA    | 0  | 4        | Not-determined | Genome-fragment | NA    | 0     |
| SS_vs_k141_170621        | [H2]gene | 1945  | No  | NA    | 0  | 0        | Low-quality    | Genome-fragment | 4.93  | 0     |
| SS_vs_k141_1628          | [full]   | 1946  | No  | NA    | 1  | 0        | Low-quality    | Genome-fragment | 4.36  | 0     |
| SS_vs_k141_16777         | [full]   | 2448  | No  | NA    | 0  | 4        | Not-determined | Genome-fragment | NA    | 0     |
| SS_vs_k141_12019         | [full]   | 3558  | No  | NA    | 0  | 2        | Not-determined | Genome-fragment | NA    | 0     |
| SS_vs_k141_136337        | [full]   | 1946  | No  | NA    | 0  | 2        | Low-quality    | Genome-fragment | 0.86  | 0     |
| SS_vs_134862             | [full]   | 1946  | No  | NA    | 2  | 0        | Low-quality    | Genome-fragment | 6.57  | 0     |
| SS_vs_k141_130723        | [full]   | 1946  | No  | NA    | 1  | 0        | Low-quality    | Genome-fragment | 2.27  | 0     |
| SS_vs_k141_126449        | [full]   | 1768  | No  | NA    | 0  | 1        | Not-determined | Genome-fragment | NA    | 0     |
| SS_extracted_27739       |          | 1946  | No  | NA    | 1  | 0        | Low-quality    | Genome-fragment | 4.29  | 0     |
| SS_vs_k141_12040         | [full]   | 1616  | No  | NA    | 0  | 2        | Not-determined | Genome-fragment | NA    | 0     |
| SS_vs_k141_16787         | [full]   | 12607 | No  | NA    | 0  | 0        | Not-determined | Genome-fragment | NA    | 0     |
| SS_extracted_k141_67519  |          | 1947  | No  | NA    | 1  | 0        | Low-quality    | Genome-fragment | 4.36  | 0     |
| SS_vs_k141_17344         | [full]   | 1222  | No  | NA    | 0  | 1        | Not-determined | Genome-fragment | NA    | 0     |
| SS_extracted_k141_96973  |          | 1947  | No  | NA    | 0  | 0        | Low-quality    | Genome-fragment | 3.27  | 0     |
| SS_vs_k141_89896         | [full]   | 1947  | No  | NA    | 1  | 0        | Low-quality    | Genome-fragment | 4.6   | 0     |
| SS_extracted_k141_125755 |          | 1947  | Yes | 730   | 1  | 1        | Low-quality    | Genome-fragment | 1.56  | 62.51 |
| SS_vs_k141_17926         | [full]   | 1947  | No  | NA    | 0  | 0        | Low-quality    | Genome-fragment | NA    | 0     |
| SS_vs_k141_40114         | [full]   | 1185  | No  | NA    | 0  | 1        | Not-determined | Genome-fragment | NA    | 0     |
| SS_vs_106816             | [full]   | 1947  | No  | NA    | 0  | 1        | Low-quality    | Genome-fragment | 3.96  | 0     |
| SS_vs_k141_126492        | [full]   | 3002  | No  | NA    | 0  | 2        | Not-determined | Genome-fragment | NA    | 0     |
| SS_vs_k141_143148        | [full]   | 3562  | No  | NA    | 0  | 1        | Not-determined | Genome-fragment | NA    | 0     |
| SS_extracted_32795       |          | 1947  | No  | NA    | 0  | 1        | Low-quality    | Genome-fragment | 1.04  | 0     |
| SS_vs_k141_15634         | [full]   | 1034  | No  | NA    | 0  | 0        | Not-determined | Genome-fragment | NA    | 0     |
| SS_vs_k141_11510         | [full]   | 16912 | Yes | 38937 | 71 | Complete | High-quality   | Genome-fragment | 100   | 76.88 |
| SS_vs_k141_35301         | [full]   | 1050  | No  | NA    | 0  | 1        | Not-determined | Genome-fragment | NA    | 0     |
| SS_vs_k141_197401        | [full]   | 1947  | No  | NA    | 1  | 0        | Low-quality    | Genome-fragment | 0.75  | 0     |
| SS_vs_k141_159501        | [H2]gene | 1948  | No  | NA    | 0  | 0        | Low-quality    | Genome-fragment | 2.19  | 0     |
| SS_vs_k141_72212         | [full]   | 1948  | No  | NA    | 0  | 2        | Low-quality    | Genome-fragment | 0.86  | 0     |
| SS_vs_k141_126528        | [full]   | 1318  | No  | NA    | 0  | 1        | Not-determined | Genome-fragment | NA    | 0     |
| SS_vs_k141_33587         | [full]   | 2225  | No  | NA    | 0  | 1        | Not-determined | Genome-fragment | NA    | 0     |
| SS_vs_85351              | [full]   | 1948  | No  | NA    | 1  | 0        | Low-quality    | Genome-fragment | 2.19  | 0     |
| SS_vs_k141_143179        | [full]   | 6465  | No  | NA    | 0  | 4        | Not-determined | Genome-fragment | NA    | 0     |
| SS_vs_k141_126543        | [full]   | 8177  | No  | NA    | 0  | 1        | Not-determined | Genome-fragment | NA    | 0     |
| SS_vs_k141_13359         | [full]   | 2475  | No  | NA    | 0  | 0        | Not-determined | Genome-fragment | NA    | 0     |
| SS_vs_k141_53600         | [full]   | 1652  | No  | NA    | 0  | 3        | Not-determined | Genome-fragment | NA    | 0     |
| SS_vs_k141_92766         | [H2]gene | 1948  | No  | NA    | 2  | 0        | Low-quality    | Genome-fragment | 4.54  | 0     |
| SS_vs_k141_95449         | [full]   | 1813  | No  | NA    | 0  | 0        | Not-determined | Genome-fragment | NA    | 0     |
| SS_extracted_k141_96274  |          | 1948  | No  | NA    | 0  | 0        | Low-quality    | Genome-fragment | 4.21  | 0     |
| SS_vs_k141_13649         | [full]   | 2701  | No  | NA    | 0  | 3        | Not-determined | Genome-fragment | NA    | 0     |
| SS_vs_k141_9546          | [full]   | 1898  | No  | NA    | 0  |          |                |                 |       |       |



|                            |       |     |    |    |                |                 |       |       |
|----------------------------|-------|-----|----|----|----------------|-----------------|-------|-------|
| 59_extracted_k141_37339    | 1953  | No  | 1  | 0  | Low-quality    | Genome-fragment | 1.12  | 0     |
| 55_vo_k141_54311 f full    | 2160  | No  | 0  | 2  | Not-determined | Genome-fragment | NA    | 0     |
| 59_vo_k141_37555 f full    | 1953  | No  | 2  | 0  | Low-quality    | Genome-fragment | 5.35  | 0     |
| 55_vo_k141_136704 f full   | 1252  | No  | 0  | 0  | Not-determined | Genome-fragment | NA    | 0     |
| 514_vo_k141_95859 f full   | 1953  | No  | 0  | 0  | Low-quality    | Genome-fragment | 1.4   | 0     |
| 55_vo_k141_40269 f full    | 1517  | No  | 0  | 0  | Not-determined | Genome-fragment | NA    | 0     |
| 55_vo_k141_95637 f full    | 1451  | No  | 0  | 1  | Not-determined | Genome-fragment | NA    | 0     |
| 55_vo_k141_40281 f full    | 1376  | No  | 0  | 3  | Not-determined | Genome-fragment | NA    | 0     |
| 53_extracted_k141_44599    | 1953  | No  | 0  | 1  | Low-quality    | Genome-fragment | 3.18  | 0     |
| 55_vo_k141_22210 f full    | 12964 | No  | 0  | 4  | Not-determined | Genome-fragment | NA    | 0     |
| 53_vo_k141_40453 f full    | 1953  | No  | 2  | 0  | Low-quality    | Genome-fragment | 3.26  | 0     |
| 53_vo_k141_101091 f full   | 1953  | No  | 0  | 0  | Low-quality    | Genome-fragment | 3.69  | 0     |
| 516_vo_65731 f full        | 1953  | No  | 2  | 0  | Low-quality    | Genome-fragment | 4.15  | 0     |
| 55_vo_k141_70804 f full    | 6067  | No  | 0  | 5  | Not-determined | Genome-fragment | NA    | 0     |
| 510_vo_35919 f full        | 1953  | No  | 1  | 0  | Low-quality    | Genome-fragment | 3.76  | 0     |
| 55_vo_k141_116726 f full   | 1747  | No  | 0  | 0  | Not-determined | Genome-fragment | NA    | 0     |
| 55_vo_k141_75644 f full    | 13262 | No  | 0  | 9  | Not-determined | Genome-fragment | NA    | 0     |
| 55_vo_k141_131759 f full   | 1332  | No  | 0  | 0  | Not-determined | Genome-fragment | NA    | 0     |
| 512_vo_k141_85005 f full   | 1953  | No  | 0  | 2  | Low-quality    | Genome-fragment | 1.25  | 0     |
| 55_vo_k141_131792 f full   | 1078  | No  | 0  | 1  | Not-determined | Genome-fragment | NA    | 0     |
| 58_extracted_k141_87607    | 1953  | No  | 0  | 1  | Low-quality    | Genome-fragment | 0.58  | 0     |
| 55_vo_k141_57351 f full    | 1548  | No  | 0  | 0  | Not-determined | Genome-fragment | NA    | 0     |
| 55_vo_k141_46306 f full    | 4267  | No  | 0  | 2  | Not-determined | Genome-fragment | NA    | 0     |
| 517_vo_k141_60574 f full   | 1954  | No  | 2  | 0  | Low-quality    | Genome-fragment | 3.97  | 0     |
| 55_vo_k141_95697 f full    | 10300 | No  | 0  | 9  | Not-determined | Genome-fragment | NA    | 0     |
| 514_vo_k141_111272 f full  | 1954  | No  | 0  | 0  | Low-quality    | Genome-fragment | 1.12  | 0     |
| 55_vo_k141_126813 f full   | 1565  | No  | 0  | 1  | Not-determined | Genome-fragment | NA    | 0     |
| 55_vo_k141_120297 f full   | 1630  | No  | 0  | 1  | Not-determined | Genome-fragment | NA    | 0     |
| 59_vo_k141_8000 f full     | 1955  | No  | 0  | 0  | Low-quality    | Genome-fragment | 4.64  | 0     |
| 55_vo_k141_113780 f full   | 1253  | No  | 0  | 0  | Not-determined | Genome-fragment | NA    | 0     |
| 55_vo_k141_143405 f full   | 7063  | No  | 0  | 4  | Not-determined | Genome-fragment | NA    | 0     |
| 55_vo_k141_131887 f full   | 3018  | No  | 0  | 2  | Not-determined | Genome-fragment | NA    | 0     |
| 55_vo_k141_35626 f full    | 1447  | No  | 0  | 0  | Not-determined | Genome-fragment | NA    | 0     |
| 55_vo_k141_5772 f full     | 4797  | No  | 0  | 1  | Not-determined | Genome-fragment | NA    | 0     |
| 57_vo_84081 f full         | 1955  | No  | 0  | 0  | Low-quality    | Genome-fragment | 4.92  | 0     |
| 516_vo_74062 f full        | 1955  | No  | 0  | 2  | Low-quality    | Genome-fragment | 3.58  | 0     |
| 58_extracted_k141_188486   | 1955  | No  | 0  | 0  | Low-quality    | Genome-fragment | 6.22  | 0     |
| 55_vo_k141_100110 f full   | 1453  | No  | 0  | 0  | Not-determined | Genome-fragment | NA    | 0     |
| 55_vo_k141_143471 f full   | 5595  | No  | 0  | 6  | Not-determined | Genome-fragment | NA    | 0     |
| 55_vo_k141_76758 f full    | 1956  | No  | 0  | 0  | Low-quality    | Genome-fragment | 5.06  | 0     |
| 55_vo_k141_46394 f full    | 60490 | No  | 6  | 32 | High-quality   | High-quality    | 100   | 0     |
| 57_vo_125365 f l2gene      | 1956  | No  | 1  | 0  | Low-quality    | Genome-fragment | 2.86  | 0     |
| 512_vo_k141_142437 f full  | 1956  | No  | 3  | 0  | Low-quality    | Genome-fragment | 1.25  | 0     |
| 56_vo_k141_39938 f full    | 1956  | No  | 0  | 2  | Low-quality    | Genome-fragment | 6.65  | 0     |
| 55_vo_k141_136818 f full   | 3538  | No  | 0  | 2  | Not-determined | Genome-fragment | NA    | 0     |
| 55_vo_k141_143512 f full   | 1070  | No  | 0  | 1  | Not-determined | Genome-fragment | NA    | 0     |
| 55_vo_k141_75843 f full    | 7638  | No  | 0  | 3  | Not-determined | Genome-fragment | NA    | 0     |
| 55_vo_k141_143521 f full   | 1956  | No  | 0  | 0  | Not-determined | Genome-fragment | NA    | 0     |
| 55_vo_k141_271822 f full   | 1015  | No  | 0  | 0  | Not-determined | Genome-fragment | NA    | 0     |
| 59_extracted_k141_44323    | 1957  | No  | 1  | 0  | Low-quality    | Genome-fragment | 3.59  | 0     |
| 514_extracted_k141_76062   | 1957  | No  | 1  | 0  | Low-quality    | Genome-fragment | 7.29  | 0     |
| 514_extracted_k141_49812   | 1957  | No  | 0  | 0  | Low-quality    | Genome-fragment | 1.21  | 0     |
| 55_vo_k141_5841 f full     | 1212  | No  | 0  | 1  | Not-determined | Genome-fragment | NA    | 0     |
| 55_vo_k141_27197 f full    | 4337  | No  | 0  | 0  | Not-determined | Genome-fragment | NA    | 0     |
| 514_vo_k141_89615 f full   | 1957  | No  | 0  | 2  | Low-quality    | Genome-fragment | 0.57  | 0     |
| 514_vo_k141_45664 f full   | 1957  | No  | 0  | 1  | Low-quality    | Genome-fragment | 1.99  | 0     |
| 55_vo_k141_75866 f full    | 2327  | No  | 0  | 0  | Not-determined | Genome-fragment | NA    | 0     |
| 51_extracted_k141_22752    | 1957  | No  | 0  | 0  | Low-quality    | Genome-fragment | 4.46  | 0     |
| 57_vo_102401 f full        | 1957  | No  | 0  | 1  | Low-quality    | Genome-fragment | 2.26  | 0     |
| 57_vo_112490 f full        | 1957  | No  | 0  | 0  | Low-quality    | Genome-fragment | 2.83  | 0     |
| 55_vo_k141_23880 f full    | 1099  | No  | 0  | 2  | Not-determined | Genome-fragment | NA    | 0     |
| 55_vo_k141_86436 f full    | 1017  | No  | 0  | 0  | Not-determined | Genome-fragment | NA    | 0     |
| 55_vo_k141_100392 f full   | 3724  | No  | 0  | 3  | Not-determined | Genome-fragment | NA    | 0     |
| 55_vo_k141_143572 f full   | 2481  | No  | 0  | 2  | Not-determined | Genome-fragment | NA    | 0     |
| 55_vo_k141_89317 f full    | 1598  | No  | 0  | 0  | Not-determined | Genome-fragment | NA    | 0     |
| 55_vo_k141_27251 f full    | 3250  | No  | 0  | 2  | Not-determined | Genome-fragment | NA    | 0     |
| 55_vo_k141_65125 f full    | 1305  | No  | 0  | 2  | Not-determined | Genome-fragment | NA    | 0     |
| 55_vo_k141_40362 f full    | 1182  | No  | 0  | 3  | Not-determined | Genome-fragment | NA    | 0     |
| 516_vo_108588 f full       | 1957  | No  | 0  | 0  | Low-quality    | Genome-fragment | 4.52  | 0     |
| 55_vo_k141_81598 f full    | 3428  | No  | 0  | 2  | Not-determined | Genome-fragment | NA    | 0     |
| 510_vo_65189 f full        | 1957  | No  | 0  | 0  | Low-quality    | Genome-fragment | 2.63  | 0     |
| 512_vo_k141_50526 f full   | 1957  | No  | 1  | 1  | Low-quality    | Genome-fragment | 3.95  | 0     |
| 512_vo_k141_50658 f full   | 1957  | No  | 1  | 0  | Low-quality    | Genome-fragment | 3.67  | 0     |
| 515_extracted_13416        | 1957  | Yes | 1  | 1  | Low-quality    | Genome-fragment | 0.34  | 78.79 |
| 54_extracted_22392         | 1957  | No  | 0  | 0  | Low-quality    | Genome-fragment | 0.46  | 0     |
| 58_vo_k141_182354 f full   | 1957  | No  | 0  | 1  | Low-quality    | Genome-fragment | 1.13  | 0     |
| 55_vo_k141_35789 f full    | 4782  | No  | 0  | 3  | Not-determined | Genome-fragment | NA    | 0     |
| 55_vo_k141_100459 f full   | 2639  | No  | 0  | 0  | Not-determined | Genome-fragment | NA    | 0     |
| 55_vo_k141_120566 f full   | 2906  | No  | 0  | 0  | Not-determined | Genome-fragment | NA    | 0     |
| 58_vo_k141_134601 f full   | 1957  | No  | 0  | 2  | Low-quality    | Genome-fragment | 0.9   | 0     |
| 57_vo_k141_11126 f full    | 1958  | No  | 0  | 1  | Low-quality    | Genome-fragment | 1.35  | 0     |
| 55_vo_k141_146002 f full   | 4389  | No  | 0  | 1  | Not-determined | Genome-fragment | NA    | 0     |
| 55_vo_k141_95918 f full    | 1440  | No  | 0  | 2  | Not-determined | Genome-fragment | NA    | 0     |
| 55_vo_k141_35796 f full    | 2861  | No  | 0  | 2  | Not-determined | Genome-fragment | NA    | 0     |
| 511_vo_k141_15534 f full   | 1958  | No  | 0  | 1  | Low-quality    | Genome-fragment | 1.07  | 0     |
| 513_vo_29250 f full        | 1958  | No  | 0  | 1  | Low-quality    | Genome-fragment | 3.88  | 0     |
| 514_extracted_k141_17592   | 1958  | No  | 2  | 0  | Low-quality    | Genome-fragment | 6.45  | 0     |
| 55_vo_k141_10760 f full    | 2918  | No  | 0  | 1  | Not-determined | Genome-fragment | NA    | 0     |
| 514_vo_k141_63588 f full   | 1958  | No  | 0  | 0  | Low-quality    | Genome-fragment | 2.23  | 0     |
| 55_vo_k141_10776 f full    | 3647  | No  | 0  | 3  | Not-determined | Genome-fragment | NA    | 0     |
| 514_vo_k141_21874 f full   | 1958  | No  | 1  | 0  | Low-quality    | Genome-fragment | 4.6   | 0     |
| 55_vo_k141_23577 f full    | 1107  | No  | 0  | 0  | Not-determined | Genome-fragment | NA    | 0     |
| 55_vo_k141_76043 f full    | 3910  | No  | 0  | 0  | Not-determined | Genome-fragment | NA    | 0     |
| 55_vo_k141_46620 f full    | 1409  | No  | 0  | 1  | Not-determined | Genome-fragment | NA    | 0     |
| 55_vo_k141_59973 f full    | 2837  | No  | 0  | 1  | Not-determined | Genome-fragment | NA    | 0     |
| 55_vo_k141_35856 f full    | 5357  | No  | 0  | 4  | Not-determined | Genome-fragment | NA    | 0     |
| 55_vo_k141_120612 f full   | 1946  | No  | 0  | 1  | Not-determined | Genome-fragment | NA    | 0     |
| 55_vo_k141_15859 f full    | 1461  | No  | 0  | 0  | Not-determined | Genome-fragment | NA    | 0     |
| 55_vo_k141_1320891 f full  | 5490  | No  | 0  | 3  | Not-determined | Genome-fragment | NA    | 0     |
| 55_vo_k141_22022 f full    | 1958  | No  | 0  | 0  | Low-quality    | Genome-fragment | 5.48  | 0     |
| 57_extracted_6716          | 1958  | No  | 0  | 0  | Low-quality    | Genome-fragment | 6.85  | 0     |
| 55_vo_k141_40431 f full    | 1851  | No  | 0  | 0  | Not-determined | Genome-fragment | NA    | 0     |
| 55_vo_k141_76063 f full    | 2671  | No  | 0  | 1  | Not-determined | Genome-fragment | NA    | 0     |
| 54_extracted_15892         | 1958  | No  | 3  | 0  | Low-quality    | Genome-fragment | 6.46  | 0     |
| 55_vo_k141_114082 f full   | 2549  | No  | 2  | 2  | Not-determined | Genome-fragment | NA    | 0     |
| 51_vo_k141_87087 f full    | 1959  | No  | 0  | 0  | Low-quality    | Genome-fragment | 4.72  | 0     |
| 55_vo_k141_136973 f full   | 1679  | No  | 0  | 2  | Not-determined | Genome-fragment | NA    | 0     |
| 51_vo_k141_101872 f full   | 1959  | No  | 1  | 0  | Low-quality    | Genome-fragment | 4.39  | 0     |
| 57_vo_73106 f full         | 1959  | No  | 0  | 0  | Low-quality    | Genome-fragment | 4.23  | 0     |
| 57_vo_85175 f full         | 1959  | No  | 1  | 0  | Low-quality    | Genome-fragment | 1.72  | 0     |
| 510_vo_102460 f full       | 1959  | No  | 0  | 0  | Low-quality    | Genome-fragment | 1.26  | 0     |
| 515_vo_63343 f full        | 1959  | No  | 0  | 0  | Low-quality    | Genome-fragment | 4.39  | 0     |
| 53_extracted_k141_100293   | 1960  | No  | 0  | 2  | Low-quality    | Genome-fragment | 4.33  | 0     |
| 55_vo_k141_22652 f full    | 1114  | No  | 0  | 0  | Not-determined | Genome-fragment | NA    | 0     |
| 55_vo_k141_46669 f full    | 2005  | No  | 0  | 0  | Not-determined | Genome-fragment | NA    | 0     |
| 53_extracted_k141_111402   | 1960  | No  | 0  | 0  | Low-quality    | Genome-fragment | 3.88  | 0     |
| 53_vo_k141_29102 f full    | 1960  | No  | 0  | 1  | Low-quality    | Genome-fragment | 2.95  | 0     |
| 55_extracted_k141_88786    | 1960  | No  | 0  | 0  | Low-quality    | Genome-fragment | 3.45  | 0     |
| 55_vo_k141_56021 f full    | 1583  | No  | 0  | 0  | Not-determined | Genome-fragment | NA    | 0     |
| 55_vo_k141_81687 f full    | 3182  | No  | 0  | 2  | Not-determined | Genome-fragment | NA    | 0     |
| 55_vo_k141_6021 f full     | 6938  | No  | 0  | 2  | Not-determined | Genome-fragment | NA    | 0     |
| 55_vo_k141_23685 f full    | 2339  | No  | 0  | 1  | Not-determined | Genome-fragment | NA    | 0     |
| 517_vo_k141_82106 f full   | 1961  | No  | 0  | 1  | Low-quality    | Genome-fragment | 1.72  | 0     |
| 55_vo_k141_147470 f full   | 1153  | No  | 0  | 1  | Not-determined | Genome-fragment | NA    | 0     |
| 51_extracted_k141_28694    | 1961  | No  | 0  | 1  | Low-quality    | Genome-fragment | 1.48  | 0     |
| 55_vo_k141_114161 f full   | 1050  | No  | 0  | 1  | Not-determined | Genome-fragment | NA    | 0     |
| 55_vo_k141_114168 f full   | 2111  | No  | 0  | 1  | Not-determined | Genome-fragment | NA    | 0     |
| 57_vo_70122 f full         | 1961  | No  | 0  | 0  | Low-quality    | Genome-fragment | 2.19  | 0     |
| 55_vo_k141_109078 f full   | 5367  | No  | 0  | 0  | Not-determined | Genome-fragment | NA    | 0     |
| 516_extracted_151398       | 1961  | No  | 2  | 0  | Low-quality    | Genome-fragment | 5.33  | 0     |
| 56_vo_k141_12066 f full    | 1961  | No  | 0  | 0  | Low-quality    | Genome-fragment | 3.24  | 0     |
| 517_extracted_k141_132421  | 1962  | No  | 1  | 0  | Low-quality    | Genome-fragment | 0.9   | 0     |
| 517_vo_k141_99780 f full   | 1962  | No  | 0  | 0  | Low-quality    | Genome-fragment | 4.29  | 0     |
| 511_vo_k141_70083 f full   | 1962  | No  | 3  | 0  | Low-quality    | Genome-fragment | 4.49  | 0     |
| 514_extracted_k141_11439   | 1962  | No  | 0  | 1  | Low-quality    | Genome-fragment | 0.51  | 0     |
| 55_vo_k141_114241 f full   | 2213  | No  | 0  | 0  | Not-determined | Genome-fragment | NA    | 0     |
| 55_vo_k141_77460 f full    | 1962  | No  | 1  | 0  | Low-quality    | Genome-fragment | 3.66  | 0     |
| 55_vo_k141_89540 f full    | 22259 | No  | 20 | 0  | Medium-quality | Genome-fragment | 59.98 | 0     |
| 512_vo_k141_55572 f full   | 1962  | No  | 3  | 0  | Low-quality    | Genome-fragment | 3.2   | 0     |
| 55_vo_k141_40617 f full    | 1709  | No  | 0  | 0  | Not-determined | Genome-fragment | NA    | 0     |
| 55_vo_k141_89547 f full    | 1826  | No  | 0  | 3  | Not-determined | Genome-fragment | NA    | 0     |
| 58_vo_k141_178654 f full   | 1962  | No  | 0  | 0  | Low-quality    | Genome-fragment | 1.3   | 0     |
| 511_vo_k141_14475 f l2gene | 1963  | No  | 2  | 0  | Low-quality    | Genome-fragment | 5.08  | 0     |
| 55_vo_k141_89551 f full    | 1289  | No  | 0  | 0  | Not-determined | Genome-fragment | NA    | 0     |
| 55_vo_k141_40635 f full    | 1427  | No  | 0  | 1  | Not-determined | Genome-fragment | NA    | 0     |
| 55_vo_k141_89554 f full    | 1721  | No  | 0  | 2  | Not-determined | Genome-fragment | NA    | 0     |
| 55_vo_k141_65378 f full    | 1396  | No  | 0  | 0  | Not-determined | Genome-fragment | NA    | 0     |
| 513_vo_53462 f full        | 1963  | No  | 0  | 0  | Low-quality    | Genome-fragment | 4.5   | 0     |
| 53_extracted_k14           |       |     |    |    |                |                 |       |       |



|                           |       |     |    |       |     |                |                 |                 |       |
|---------------------------|-------|-----|----|-------|-----|----------------|-----------------|-----------------|-------|
| S13_vs_88656  full        | 1964  | No  | NA | 0     | 1   | Low-quality    | Genome-fragment | 4.11            | 0     |
| S3_vs_k141_15993  full    | 1964  | No  | NA | 0     | 1   | Low-quality    | Genome-fragment | 5.33            | 0     |
| S5_vs_k141_125630  full   | 1964  | No  | NA | 0     | 0   | Low-quality    | Genome-fragment | 2.39            | 0     |
| S7_vs_89853  full         | 1964  | No  | NA | 0     | 0   | Low-quality    | Genome-fragment | 6.05            | 0     |
| S5_vs_k141_17520  full    | 27566 | No  | NA | 17    | 0   | Medium-quality | Genome-fragment | 73.4            | 0     |
| S5_vs_k141_114465  full   | 2088  | No  | NA | 0     | 1   | Not-determined | Genome-fragment | NA              | 0     |
| S5_vs_k141_22914  full    | 6452  | No  | NA | 0     | 2   | Not-determined | Genome-fragment | NA              | 0     |
| S5_vs_k141_36112  full    | 1489  | No  | NA | 0     | 2   | Not-determined | Genome-fragment | NA              | 0     |
| S16_vs_109560  full       | 1964  | No  | NA | 0     | 1   | Low-quality    | Genome-fragment | 0.77            | 0     |
| S5_vs_k141_132291  full   | 1354  | No  | NA | 0     | 1   | Not-determined | Genome-fragment | NA              | 0     |
| S10_vs_7660  full         | 1964  | No  | NA | 3     | 0   | Low-quality    | Genome-fragment | 3.22            | 0     |
| S2_vs_k141_15781  full    | 1964  | No  | NA | 0     | 0   | Low-quality    | Genome-fragment | 3.61            | 0     |
| S5_vs_k141_17582  full    | 2649  | No  | NA | 1     | 4   | Not-determined | Genome-fragment | NA              | 0     |
| S3_extracted_k141_55263   | 1965  | No  | NA | 1     | 0   | Low-quality    | Genome-fragment | 3.18            | 0     |
| S5_vs_k141_19875  full    | 1965  | No  | NA | 0     | 2   | Low-quality    | Genome-fragment | 2.38            | 0     |
| S5_vs_k141_11275  full    | 2486  | No  | NA | 0     | 1   | Not-determined | Genome-fragment | NA              | 0     |
| S5_vs_k141_54481  full    | 1468  | No  | NA | 0     | 1   | Not-determined | Genome-fragment | NA              | 0     |
| S10_extracted_42544       | 1965  | No  | NA | 0     | 1   | Low-quality    | Genome-fragment | 0.34            | 0     |
| S5_vs_k141_114502  full   | 2140  | No  | NA | 0     | 1   | Not-determined | Genome-fragment | NA              | 0     |
| S8_extracted_k141_103604  | 1965  | No  | NA | 1     | 0   | Low-quality    | Genome-fragment | 9.95            | 0     |
| S5_vs_k141_36150  full    | 1365  | No  | NA | 0     | 0   | Not-determined | Genome-fragment | NA              | 0     |
| S3_extracted_k141_119402  | 1966  | No  | NA | 1     | 0   | Low-quality    | Genome-fragment | 4.04            | 0     |
| S5_vs_k141_60055  H2gene  | 1966  | No  | NA | 2     | 0   | Low-quality    | Genome-fragment | 5.08            | 0     |
| S5_vs_k141_22951  full    | 1079  | No  | NA | 0     | 0   | Not-determined | Genome-fragment | NA              | 0     |
| S12_vs_k141_156484  full  | 1966  | No  | NA | 2     | 0   | Low-quality    | Genome-fragment | 5.56            | 0     |
| S5_vs_k141_137154  full   | 1827  | No  | NA | 14    | 1   | Medium-quality | Genome-fragment | 52.9            | 0     |
| S5_vs_k141_71311  full    | 1224  | No  | NA | 0     | 2   | Not-determined | Genome-fragment | NA              | 0     |
| S5_vs_k141_137166  full   | 1307  | No  | NA | 0     | 0   | Not-determined | Genome-fragment | NA              | 0     |
| S8_vs_k141_139817  full   | 1966  | No  | NA | 0     | 0   | Low-quality    | Genome-fragment | 1.04            | 0     |
| S14_vs_k141_51852  full   | 1967  | No  | NA | 1     | 0   | Low-quality    | Genome-fragment | 4.13            | 0     |
| S3_vs_k141_19017  full    | 1967  | No  | NA | 1     | 0   | Low-quality    | Genome-fragment | 3.41            | 0     |
| S5_vs_k141_121052  full   | 1312  | No  | NA | 0     | 1   | Not-determined | Genome-fragment | NA              | 0     |
| S5_vs_k141_17679  full    | 1292  | No  | NA | 0     | 1   | Not-determined | Genome-fragment | NA              | 0     |
| S5_vs_k141_54554  full    | 1595  | No  | NA | 0     | 0   | Not-determined | Genome-fragment | NA              | 0     |
| S5_vs_k141_13021  full    | 8282  | No  | NA | 0     | 2   | Not-determined | Genome-fragment | NA              | 0     |
| S10_vs_k1618  full        | 1967  | No  | NA | 0     | 1   | Low-quality    | Genome-fragment | 4.15            | 0     |
| S8_extracted_k141_150759  | 1967  | No  | NA | 0     | 1   | Low-quality    | Genome-fragment | 0.52            | 0     |
| S5_vs_k141_127241  full   | 1312  | No  | NA | 0     | 0   | Not-determined | Genome-fragment | NA              | 0     |
| S5_vs_k141_17722  full    | 1419  | No  | NA | 0     | 0   | Not-determined | Genome-fragment | NA              | 0     |
| S5_vs_k141_121074  full   | 18227 | No  | NA | 0     | 10  | Not-determined | Genome-fragment | NA              | 0     |
| S5_vs_k141_17519  full    | 4171  | No  | NA | 0     | 3   | Not-determined | Genome-fragment | NA              | 0     |
| S16_vs_40508  full        | 1968  | No  | NA | 0     | 0   | Low-quality    | Genome-fragment | 4.43            | 0     |
| S5_vs_k141_114558  full   | 2041  | No  | NA | 0     | 1   | Not-determined | Genome-fragment | NA              | 0     |
| S10_extracted_65546       | 1968  | No  | NA | 0     | 0   | Low-quality    | Genome-fragment | 3.75            | 0     |
| S10_vs_119874  full       | 1968  | No  | NA | 0     | 3   | Low-quality    | Genome-fragment | 2.65            | 0     |
| S11_vs_k141_98673  full   | 1969  | No  | NA | 0     | 2   | Low-quality    | Genome-fragment | 2.56            | 0     |
| S5_vs_k141_47267  full    | 2144  | No  | NA | 0     | 1   | Not-determined | Genome-fragment | NA              | 0     |
| S14_vs_k141_96545  full   | 1969  | No  | NA | 1     | 0   | Low-quality    | Genome-fragment | 6.43            | 0     |
| S5_vs_k141_17774  full    | 2223  | No  | NA | 0     | 0   | Not-determined | Genome-fragment | NA              | 0     |
| S5_vs_k141_89955  full    | 1153  | No  | NA | 0     | 1   | Not-determined | Genome-fragment | NA              | 0     |
| S5_vs_k141_13131  full    | 2059  | No  | NA | 0     | 2   | Not-determined | Genome-fragment | NA              | 0     |
| S16_vs_62255  full        | 1969  | No  | NA | 0     | 0   | Low-quality    | Genome-fragment | 3.77            | 0     |
| S5_vs_k141_17796  full    | 1933  | No  | NA | 1     | 1   | Not-determined | Genome-fragment | NA              | 0     |
| S5_vs_k141_82010  full    | 1560  | No  | NA | 0     | 3   | Not-determined | Genome-fragment | NA              | 0     |
| S14_extracted_k141_73543  | 1970  | No  | NA | 5     | 0   | Low-quality    | Genome-fragment | 6.5             | 0     |
| S1_extracted_k141_46748   | 1970  | No  | NA | 0     | 2   | Low-quality    | Genome-fragment | 1.27            | 0     |
| S16_vs_156187  full       | 1970  | No  | NA | 0     | 2   | Low-quality    | Genome-fragment | 2.68            | 0     |
| S15_vs_82764  full        | 1970  | No  | NA | 0     | 0   | Low-quality    | Genome-fragment | 36.45           | 0     |
| S5_vs_k141_114626  full   | 1330  | No  | NA | 0     | 0   | Not-determined | Genome-fragment | NA              | 0     |
| S5_vs_k141_17834  full    | 1081  | No  | NA | 0     | 0   | Not-determined | Genome-fragment | NA              | 0     |
| S5_vs_k141_132447  full   | 2398  | No  | NA | 0     | 1   | Not-determined | Genome-fragment | NA              | 0     |
| S6_vs_k141_83818  full    | 1970  | No  | NA | 0     | 0   | Low-quality    | Genome-fragment | 5.61            | 0     |
| S5_vs_k141_96327  full    | 2340  | No  | NA | 0     | 0   | Not-determined | Genome-fragment | NA              | 0     |
| S8_vs_k141_119112  full   | 1970  | No  | NA | 0     | 2   | Low-quality    | Genome-fragment | 0.61            | 0     |
| S5_vs_k141_17844  full    | 3930  | No  | NA | 0     | 1   | Not-determined | Genome-fragment | NA              | 0     |
| S11_vs_k141_61233  full   | 1971  | No  | NA | 1     | 0   | Low-quality    | Genome-fragment | 4.31            | 0     |
| S13_extracted_6612        | 1971  | No  | NA | 0     | 1   | Low-quality    | Genome-fragment | 0.98            | 0     |
| S13_vs_13706  full        | 1971  | No  | NA | 0     | 1   | Low-quality    | Genome-fragment | 4.97            | 0     |
| S14_vs_k141_71312  full   | 1971  | No  | NA | 0     | 0   | Low-quality    | Genome-fragment | 5.14            | 0     |
| S14_vs_k141_21478  full   | 1971  | No  | NA | 1     | 0   | Low-quality    | Genome-fragment | 4.48            | 0     |
| S1_vs_k141_136423  H2gene | 1971  | No  | NA | 1     | 0   | Low-quality    | Genome-fragment | 2.45            | 0     |
| S5_vs_k141_100777  full   | 4534  | No  | NA | 1     | 1   | Not-determined | Genome-fragment | NA              | 0     |
| S5_vs_k141_139902  full   | 1971  | No  | NA | 1     | 0   | Low-quality    | Genome-fragment | 3.08            | 0     |
| S5_vs_k141_17582  full    | 3120  | No  | NA | 0     | 0   | Not-determined | Genome-fragment | NA              | 0     |
| S7_vs_112228  full        | 1971  | No  | NA | 1     | 0   | Low-quality    | Genome-fragment | 5.87            | 0     |
| S16_extracted_58368       | 1971  | No  | NA | 1     | 0   | Low-quality    | Genome-fragment | 3.11            | 0     |
| S5_vs_k141_127419  full   | 2620  | No  | NA | 0     | 4   | Not-determined | Genome-fragment | NA              | 0     |
| S10_vs_64951  full        | 1971  | No  | NA | 0     | 1   | Low-quality    | Genome-fragment | 3.32            | 0     |
| S5_vs_k141_71409  full    | 1465  | No  | NA | 0     | 0   | Not-determined | Genome-fragment | NA              | 0     |
| S10_vs_76491  full        | 1971  | No  | NA | 2     | 0   | Low-quality    | Genome-fragment | 3.36            | 0     |
| S5_vs_k141_127455  full   | 2247  | No  | NA | 0     | 2   | Not-determined | Genome-fragment | NA              | 0     |
| S5_vs_k141_127460  full   | 1615  | No  | NA | 0     | 0   | Not-determined | Genome-fragment | NA              | 0     |
| S1_extracted_k141_26056   | 1972  | No  | NA | 0     | 1   | Low-quality    | Genome-fragment | 1.2             | 0     |
| S5_vs_k141_127455  full   | 2108  | No  | NA | 0     | 1   | Not-determined | Genome-fragment | NA              | 0     |
| S3_extracted_k141_98259   | 1972  | No  | NA | 0     | 0   | Low-quality    | Genome-fragment | 3.65            | 0     |
| S15_extracted_60845       | 1972  | No  | NA | 0     | 0   | Low-quality    | Genome-fragment | 3.69            | 0     |
| S5_vs_k141_47480  full    | 1140  | No  | NA | 0     | 1   | Not-determined | Genome-fragment | NA              | 0     |
| S8_extracted_k141_155184  | 1972  | No  | NA | 0     | 1   | Low-quality    | Genome-fragment | 2.22            | 0     |
| S17_extracted_k141_150765 | 1973  | No  | NA | 0     | 3   | Low-quality    | Genome-fragment | 3.69            | 0     |
| S5_vs_k141_64400  full    | 1973  | No  | NA | 1     | 0   | Low-quality    | Genome-fragment | 2.78            | 0     |
| S5_vs_k141_40848  full    | 23641 | Yes | NA | 62183 | 25  | 111            | High-quality    | High-quality    | 100   |
| S16_extracted_47418       | 1973  | No  | NA | 0     | 0   | Not-determined | Genome-fragment | 2.11            | 73.39 |
| S16_vs_141786  full       | 1973  | No  | NA | 0     | 4   | Low-quality    | Genome-fragment | 1.77            | 0     |
| S4_extracted_19596        | 1973  | No  | NA | 2     | 0   | Low-quality    | Genome-fragment | 5.45            | 0     |
| S6_vs_k141_12172  full    | 1973  | No  | NA | 0     | 0   | Low-quality    | Genome-fragment | 5.14            | 0     |
| S5_vs_k141_17979  full    | 2992  | No  | NA | 0     | 0   | Not-determined | Genome-fragment | NA              | 0     |
| S17_vs_k141_50914  full   | 1974  | No  | NA | 1     | 0   | Low-quality    | Genome-fragment | 1.24            | 0     |
| S9_vs_k141_17467  full    | 1974  | No  | NA | 1     | 0   | Low-quality    | Genome-fragment | 4.73            | 0     |
| S5_vs_k141_137391  full   | 1421  | No  | NA | 0     | 1   | Not-determined | Genome-fragment | NA              | 0     |
| S3_vs_k141_88796  full    | 1974  | No  | NA | 0     | 0   | Low-quality    | Genome-fragment | 1.29            | 0     |
| S5_vs_k141_132690  full   | 2009  | No  | NA | 0     | 1   | Not-determined | Genome-fragment | NA              | 0     |
| S5_vs_k141_67647  full    | 1358  | No  | NA | 0     | 0   | Not-determined | Genome-fragment | NA              | 0     |
| S5_vs_k141_7352  full     | 1974  | No  | NA | 0     | 0   | Low-quality    | Genome-fragment | 2.8             | 0     |
| S12_vs_k141_173547  full  | 1974  | No  | NA | 0     | 1   | Low-quality    | Genome-fragment | 2.22            | 0     |
| S12_vs_k141_102764  full  | 1974  | No  | NA | 1     | 0   | Low-quality    | Genome-fragment | 2.53            | 0     |
| S17_extracted_k141_105127 | 1975  | Yes | NA | 1145  | 1   | 1              | Low-quality     | Genome-fragment | 2.19  |
| S13_vs_27342  full        | 1975  | No  | NA | 0     | 1   | Low-quality    | Genome-fragment | 2.39            | 42.03 |
| S7_vs_39881  full         | 1975  | No  | NA | 0     | 0   | Low-quality    | Genome-fragment | 4.39            | 0     |
| S5_vs_k141_47708  full    | 2454  | No  | NA | 0     | 3   | Not-determined | Genome-fragment | NA              | 0     |
| S8_extracted_k141_29508   | 1975  | No  | NA | 0     | 1   | Low-quality    | Genome-fragment | 6.31            | 0     |
| S11_vs_k141_6361  full    | 1976  | No  | NA | 1     | 0   | Low-quality    | Genome-fragment | 1.34            | 0     |
| S5_vs_k141_141367  full   | 1976  | No  | NA | 0     | 0   | Low-quality    | Genome-fragment | 3.71            | 0     |
| S5_vs_k141_89697  full    | 1976  | No  | NA | 1     | 0   | Low-quality    | Genome-fragment | 2.96            | 0     |
| S5_vs_k141_18106  full    | 1623  | No  | NA | 0     | 1   | Not-determined | Genome-fragment | NA              | 0     |
| S7_extracted_79967        | 1976  | No  | NA | 0     | 0   | Low-quality    | Genome-fragment | 2.82            | 0     |
| S7_vs_98721  full         | 1976  | No  | NA | 2     | 2   | Low-quality    | Genome-fragment | 3.08            | 0     |
| S5_vs_k141_144103  full   | 2500  | No  | NA | 0     | 2   | Not-determined | Genome-fragment | NA              | 0     |
| S10_extracted_23779       | 1976  | No  | NA | 0     | 1   | Low-quality    | Genome-fragment | 0.34            | 0     |
| S10_extracted_116849      | 1976  | No  | NA | 0     | 0   | Low-quality    | Genome-fragment | 3.92            | 0     |
| S10_vs_101747  full       | 1976  | No  | NA | 0     | 2   | Low-quality    | Genome-fragment | 0.78            | 0     |
| S12_extracted_k141_172062 | 1976  | No  | NA | 0     | 0   | Low-quality    | Genome-fragment | 3.15            | 0     |
| S12_vs_k141_146500  full  | 1976  | No  | NA | 0     | 0   | Low-quality    | Genome-fragment | 5.48            | 0     |
| S6_vs_k141_107265  full   | 1976  | No  | NA | 0     | 0   | Low-quality    | Genome-fragment | 3.25            | 0     |
| S8_vs_k141_152625  full   | 1976  | No  | NA | 0     | 0   | Low-quality    | Genome-fragment | 3.83            | 0     |
| S17_vs_k141_29551  full   | 1977  | No  | NA | 0     | 0   | Low-quality    | Genome-fragment | 5.57            | 0     |
| S11_vs_k141_5242  full    | 1977  | No  | NA | 2     | 0   | Low-quality    | Genome-fragment | 5.52            | 0     |
| S14_vs_k141_110049  full  | 1977  | No  | NA | 1     | 0   | Low-quality    | Genome-fragment | 3.49            | 0     |
| S14_vs_k141_63623  H2gene | 1977  | No  | NA | 1     | 0   | Low-quality    | Genome-fragment | 5.3             | 0     |
| S1_vs_k141_112942  full   | 1977  | No  | NA | 0     | 0   | Low-quality    | Genome-fragment | 2.87            | 0     |
| S5_vs_k141_76627  full    | 1695  | No  | NA | 0     | 1   | Not-determined | Genome-fragment | NA              | 0     |
| S5_vs_k141_137416  full   | 1479  | No  | NA | 0     | 0   | Not-determined | Genome-fragment | NA              | 0     |
| S3_extracted_k141_87340   | 1977  | No  | NA | 2     | 0   | Low-quality    | Genome-fragment | 4.1             | 0     |
| S5_vs_k141_137418  full   | 2488  | No  | NA | 0     | 3   | Not-determined | Genome-fragment | NA              | 0     |
| S16_vs_109645  H2gene     | 1977  | No  | NA | 1     | 0   | Low-quality    | Genome-fragment | 3.21            | 0     |
| S5_vs_k141_40956  full    | 1766  | No  | NA | 0     | 0   | Not-determined | Genome-fragment | NA              | 0     |
| S5_vs_k141_23408  full    | 1151  | No  | NA | 0     | 1   | Not-determined | Genome-fragment | NA              | 0     |
| S5_vs_k141_23414  full    | 8547  | No  | NA | 0     | 1   | Not-determined | Genome-fragment | NA              | 0     |
| S6_vs_k141_112031  full   | 1977  | No  | NA | 0     | 0   | Low-quality    | Genome-fragment | 3.16            | 0     |
| S13_vs_6293  full         | 1978  | No  | NA | 0     | 0   | Low-quality    | Genome-fragment | 5.23            | 0     |
| S14_extracted_k141_66649  | 1978  | No  | NA | 2     | 0   | Low-quality    | Genome-fragment | 3.06            | 0     |
| S5_vs_k141_47881  full    | 1127  | No  | NA | 0     | 0   | Not-determined | Genome-fragment | NA              | 0     |
| S14_vs_k141_8466  full    | 1978  | No  | NA | 3     | 0   | Low-quality    | Genome-fragment | 6.24            | 0     |
| S1_vs_k141_152282  full   | 1978  | No  | NA | 2     | 0   | Low-quality    | Genome-fragment | 4.68            | 0     |
| S10_vs_k141_82216  full   | 1978  | No  | NA | 0     | 0</ |                |                 |                 |       |



|                           |       |     |       |    |    |                |                 |       |       |
|---------------------------|-------|-----|-------|----|----|----------------|-----------------|-------|-------|
| 57_vs_36487  H2gene       | 1980  | No  | NA    | 1  | 0  | Low-quality    | Genome-fragment | 5.02  | 0     |
| 55_vs_k141_41161  full    | 2076  | No  | NA    | 1  | 2  | Not-determined | Genome-fragment | NA    | 0     |
| S10_vs_1750  full         | 1980  | No  | NA    | 0  | 0  | Low-quality    | Genome-fragment | 3.18  | 0     |
| 55_vs_k141_115150  full   | 5889  | No  | NA    | 0  | 3  | Not-determined | Genome-fragment | NA    | 0     |
| S12_vs_k141_74013  H2gene | 1980  | No  | NA    | 2  | 0  | Low-quality    | Genome-fragment | 4.99  | 0     |
| 56_extracted_k141_49018   | 1980  | No  | NA    | 1  | 0  | Low-quality    | Genome-fragment | 1.27  | 0     |
| 55_vs_k141_76805  full    | 1319  | No  | NA    | 0  | 1  | Not-determined | Genome-fragment | NA    | 0     |
| S11_vs_k141_7744  full    | 1981  | No  | NA    | 1  | 0  | Low-quality    | Genome-fragment | 4.67  | 0     |
| S13_vs_k141_51817  full   | 1981  | No  | NA    | 0  | 0  | Low-quality    | Genome-fragment | 0.81  | 0     |
| 55_vs_k141_23642  full    | 3150  | No  | NA    | 0  | 1  | Not-determined | Genome-fragment | NA    | 0     |
| 55_vs_k141_72020  full    | 2154  | No  | NA    | 0  | 0  | Not-determined | Genome-fragment | NA    | 0     |
| S14_vs_k141_53066  full   | 1981  | No  | NA    | 0  | 0  | Low-quality    | Genome-fragment | 2.94  | 0     |
| 55_vs_k141_56988  full    | 1712  | No  | NA    | 0  | 2  | Not-determined | Genome-fragment | NA    | 0     |
| 55_vs_k141_121860  full   | 1981  | No  | NA    | 2  | 0  | Low-quality    | Genome-fragment | 4.58  | 0     |
| 55_vs_k141_82456  full    | 1512  | No  | NA    | 0  | 3  | Not-determined | Genome-fragment | NA    | 0     |
| 55_vs_k141_27475  full    | 1981  | No  | NA    | 1  | 0  | Low-quality    | Genome-fragment | 3.91  | 0     |
| 55_vs_k141_82238  full    | 1981  | No  | NA    | 0  | 1  | Low-quality    | Genome-fragment | 4.64  | 0     |
| S16_extracted_18382       | 1981  | No  | NA    | 0  | 0  | Low-quality    | Genome-fragment | 2.55  | 0     |
| 55_vs_k141_50559  full    | 1148  | No  | NA    | 0  | 2  | Not-determined | Genome-fragment | NA    | 0     |
| 55_vs_k141_90670  full    | 2040  | No  | NA    | 0  | 0  | Not-determined | Genome-fragment | NA    | 0     |
| S16_vs_171236  full       | 1981  | No  | NA    | 0  | 0  | Low-quality    | Genome-fragment | 4.4   | 0     |
| 55_vs_k141_76881  full    | 1735  | No  | NA    | 0  | 1  | Not-determined | Genome-fragment | NA    | 0     |
| S12_vs_k141_130380  full  | 1981  | No  | NA    | 0  | 0  | Low-quality    | Genome-fragment | 3.68  | 0     |
| 58_vs_k141_45587  full    | 1981  | No  | NA    | 0  | 2  | Low-quality    | Genome-fragment | 1.64  | 0     |
| S11_vs_k141_23511  full   | 1982  | No  | NA    | 2  | 0  | Low-quality    | Genome-fragment | 6.82  | 0     |
| 55_vs_k141_5681  full     | 1982  | No  | NA    | 2  | 0  | Low-quality    | Genome-fragment | 4.84  | 0     |
| 55_vs_k141_133418  full   | 2387  | No  | NA    | 0  | 0  | Not-determined | Genome-fragment | NA    | 0     |
| 55_vs_k141_41305  full    | 3001  | No  | NA    | 0  | 2  | Not-determined | Genome-fragment | NA    | 0     |
| S7_vs_1006  full          | 1982  | No  | NA    | 0  | 0  | Low-quality    | Genome-fragment | 1.49  | 0     |
| S12_vs_k141_164347  full  | 1982  | No  | NA    | 0  | 0  | Low-quality    | Genome-fragment | 2.2   | 0     |
| S17_vs_k141_74165  full   | 1983  | No  | NA    | 0  | 0  | Low-quality    | Genome-fragment | 4.5   | 0     |
| S11_vs_k141_79444  H2gene | 1983  | No  | NA    | 0  | 0  | Low-quality    | Genome-fragment | 4.87  | 0     |
| S14_extracted_k141_96234  | 1983  | No  | NA    | 7  | 0  | Low-quality    | Genome-fragment | 6.55  | 0     |
| S14_vs_k141_35551  full   | 1983  | No  | NA    | 0  | 1  | Low-quality    | Genome-fragment | 2.22  | 0     |
| S11_extracted_k141_42747  | 1983  | No  | NA    | 2  | 0  | Low-quality    | Genome-fragment | 2.47  | 0     |
| 55_vs_k141_65999  full    | 2918  | No  | NA    | 0  | 1  | Not-determined | Genome-fragment | NA    | 0     |
| 55_vs_k141_66015  full    | 1065  | No  | NA    | 0  | 0  | Not-determined | Genome-fragment | NA    | 0     |
| S11_vs_k141_137892  full  | 1983  | No  | NA    | 1  | 0  | Low-quality    | Genome-fragment | 2.66  | 0     |
| 55_vs_k141_23866  full    | 3457  | No  | NA    | 0  | 3  | Not-determined | Genome-fragment | NA    | 0     |
| S3_extracted_k141_100656  | 1983  | No  | NA    | 2  | 0  | Low-quality    | Genome-fragment | 1.84  | 0     |
| 55_vs_k141_48137  full    | 1191  | No  | NA    | 0  | 1  | Not-determined | Genome-fragment | NA    | 0     |
| S7_extracted_11971        | 1983  | No  | NA    | 0  | 0  | Low-quality    | Genome-fragment | 4.83  | 0     |
| 55_vs_k141_144419  full   | 3635  | No  | NA    | 0  | 2  | Not-determined | Genome-fragment | NA    | 0     |
| S7_extracted_27207        | 1983  | No  | NA    | 2  | 0  | Low-quality    | Genome-fragment | 4.21  | 0     |
| 55_vs_k141_144424  full   | 4946  | No  | NA    | 0  | 2  | Not-determined | Genome-fragment | NA    | 0     |
| S7_extracted_11375        | 1983  | No  | NA    | 0  | 0  | Low-quality    | Genome-fragment | 5.02  | 0     |
| 55_vs_k141_23910  full    | 4137  | No  | NA    | 0  | 4  | Not-determined | Genome-fragment | NA    | 0     |
| 55_vs_k141_144446  full   | 1882  | No  | NA    | 0  | 3  | Not-determined | Genome-fragment | NA    | 0     |
| S7_vs_98129  full         | 1983  | No  | NA    | 0  | 0  | Low-quality    | Genome-fragment | 4.16  | 0     |
| 58_vs_k141_174989  full   | 1983  | No  | NA    | 0  | 0  | Low-quality    | Genome-fragment | 1.16  | 0     |
| S3_extracted_k141_67621   | 1984  | No  | NA    | 2  | 0  | Low-quality    | Genome-fragment | 0.99  | 0     |
| 55_extracted_k141_40515   | 1984  | No  | NA    | 2  | 0  | Low-quality    | Genome-fragment | 0.96  | 0     |
| 55_vs_k141_137719  full   | 7485  | No  | NA    | 0  | 0  | Not-determined | Genome-fragment | NA    | 0     |
| 55_vs_k141_23949  full    | 1381  | No  | NA    | 0  | 2  | Not-determined | Genome-fragment | NA    | 0     |
| 58_vs_k141_5824  full     | 1984  | No  | NA    | 0  | 0  | Low-quality    | Genome-fragment | 4.56  | 0     |
| 55_vs_k141_137730  full   | 2329  | No  | NA    | 0  | 1  | Not-determined | Genome-fragment | NA    | 0     |
| 55_vs_k141_66132  full    | 1074  | No  | NA    | 0  | 2  | Not-determined | Genome-fragment | NA    | 0     |
| 55_vs_k141_23954  full    | 1835  | No  | NA    | 0  | 3  | Not-determined | Genome-fragment | NA    | 0     |
| 59_vs_k141_27455  full    | 1985  | No  | NA    | 0  | 0  | Low-quality    | Genome-fragment | 5.55  | 0     |
| S13_vs_32133  full        | 1985  | No  | NA    | 0  | 0  | Low-quality    | Genome-fragment | 3.12  | 0     |
| 55_vs_k141_31538  full    | 1985  | No  | NA    | 0  | 2  | Low-quality    | Genome-fragment | 6.34  | 0     |
| 55_vs_k141_33619  H2gene  | 1985  | No  | NA    | 0  | 0  | Low-quality    | Genome-fragment | 5.62  | 0     |
| 55_vs_k141_11634  full    | 1309  | No  | NA    | 0  | 0  | Not-determined | Genome-fragment | NA    | 0     |
| 55_vs_k141_66183  full    | 3342  | No  | NA    | 0  | 1  | Not-determined | Genome-fragment | NA    | 0     |
| S7_vs_33462  full         | 1985  | No  | NA    | 2  | 0  | Low-quality    | Genome-fragment | 4.39  | 0     |
| S17_vs_k141_75215  full   | 1986  | No  | NA    | 0  | 0  | Low-quality    | Genome-fragment | 3.18  | 0     |
| 55_vs_k141_137788  full   | 1186  | No  | NA    | 0  | 0  | Not-determined | Genome-fragment | NA    | 0     |
| S7_extracted_11390        | 1986  | No  | NA    | 4  | 0  | Low-quality    | Genome-fragment | 6.51  | 0     |
| S10_extracted_16567       | 1986  | No  | NA    | 0  | 0  | Low-quality    | Genome-fragment | 8.27  | 0     |
| S10_vs_7651  full         | 1986  | No  | NA    | 1  | 0  | Low-quality    | Genome-fragment | 1.19  | 0     |
| 55_vs_k141_77192  full    | 2044  | No  | NA    | 0  | 1  | Not-determined | Genome-fragment | NA    | 0     |
| 55_vs_k141_41554  full    | 10880 | No  | NA    | 0  | 1  | Not-determined | Genome-fragment | NA    | 0     |
| 58_extracted_k141_58490   | 1986  | No  | NA    | 0  | 0  | Low-quality    | Genome-fragment | 3.13  | 0     |
| 55_vs_k141_77222  full    | 1148  | No  | NA    | 0  | 1  | Not-determined | Genome-fragment | NA    | 0     |
| 55_vs_k141_41562  full    | 2533  | No  | NA    | 0  | 2  | Not-determined | Genome-fragment | NA    | 0     |
| 55_vs_k141_72451  full    | 1680  | No  | NA    | 0  | 2  | Not-determined | Genome-fragment | NA    | 0     |
| 59_vs_k141_32419  full    | 1987  | No  | NA    | 3  | 0  | Low-quality    | Genome-fragment | 4.93  | 0     |
| 55_vs_k141_17342  full    | 1271  | No  | NA    | 0  | 0  | Not-determined | Genome-fragment | NA    | 0     |
| S3_vs_k141_17451  full    | 1987  | No  | NA    | 0  | 0  | Low-quality    | Genome-fragment | 4.76  | 0     |
| S7_extracted_33700        | 1987  | No  | NA    | 0  | 0  | Low-quality    | Genome-fragment | 6.01  | 0     |
| S12_extracted_k141_154005 | 1987  | No  | NA    | 0  | 1  | Low-quality    | Genome-fragment | 5.23  | 0     |
| S11_vs_k141_76173  full   | 1988  | No  | NA    | 0  | 0  | Low-quality    | Genome-fragment | 2.95  | 0     |
| 55_vs_k141_48458  full    | 4869  | No  | NA    | 0  | 3  | Not-determined | Genome-fragment | NA    | 0     |
| 55_vs_k141_66234  full    | 3152  | No  | NA    | 0  | 1  | Not-determined | Genome-fragment | NA    | 0     |
| S13_vs_124202  full       | 1988  | No  | NA    | 0  | 0  | Low-quality    | Genome-fragment | 2.54  | 0     |
| 55_vs_k141_66237  full    | 2366  | No  | NA    | 0  | 2  | Not-determined | Genome-fragment | NA    | 0     |
| 55_vs_k141_28263  full    | 29578 | No  | NA    | 15 | 0  | Medium-quality | Genome-fragment | 85.3  | 0     |
| 55_vs_k141_66244  full    | 1559  | No  | NA    | 0  | 1  | Not-determined | Genome-fragment | NA    | 0     |
| 55_vs_k141_24111  full    | 2668  | No  | NA    | 0  | 0  | Not-determined | Genome-fragment | NA    | 0     |
| S3_vs_k141_72116  full    | 1988  | No  | NA    | 1  | 0  | Low-quality    | Genome-fragment | 3.14  | 0     |
| S3_vs_k141_126935  full   | 1988  | No  | NA    | 0  | 0  | Low-quality    | Genome-fragment | 4.25  | 0     |
| 55_vs_k141_28288  full    | 2029  | No  | NA    | 0  | 1  | Not-determined | Genome-fragment | NA    | 0     |
| 55_vs_k141_82717  full    | 1682  | No  | NA    | 0  | 1  | Not-determined | Genome-fragment | NA    | 0     |
| 55_vs_k141_82721  full    | 1984  | No  | NA    | 0  | 1  | Not-determined | Genome-fragment | NA    | 0     |
| S16_vs_105582  H2gene     | 1988  | No  | NA    | 0  | 0  | Low-quality    | Genome-fragment | 1.23  | 0     |
| 55_vs_k141_58153  full    | 1198  | No  | NA    | 0  | 0  | Not-determined | Genome-fragment | NA    | 0     |
| 55_vs_k141_72532  full    | 35583 | Yes | 36298 | 8  | 11 | Medium-quality | Genome-fragment | 70.51 | 32.26 |
| 55_vs_k141_41663  full    | 60673 | No  | NA    | 23 | 4  | High-quality   | High-quality    | 95.52 | 0     |
| 55_vs_k141_50932  full    | 2550  | No  | NA    | 0  | 0  | Low-quality    | Genome-fragment | NA    | 0     |
| 58_vs_k141_93667  full    | 1988  | No  | NA    | 0  | 1  | Low-quality    | Genome-fragment | 1.21  | 0     |
| S13_vs_36099  full        | 1989  | No  | NA    | 0  | 0  | Low-quality    | Genome-fragment | 2.33  | 0     |
| S11_vs_k141_17990  full   | 1989  | No  | NA    | 0  | 0  | Low-quality    | Genome-fragment | 1.86  | 0     |
| 55_extracted_k141_47796   | 1989  | No  | NA    | 1  | 0  | Low-quality    | Genome-fragment | 1.19  | 0     |
| 55_vs_k141_74525  full    | 1989  | No  | NA    | 0  | 0  | Low-quality    | Genome-fragment | 4.64  | 0     |
| S10_extracted_97263       | 1989  | No  | NA    | 1  | 0  | Low-quality    | Genome-fragment | 0.52  | 0     |
| S10_vs_113330  full       | 1989  | No  | NA    | 1  | 0  | Low-quality    | Genome-fragment | 4.22  | 0     |
| 55_vs_k141_24269  full    | 1558  | No  | NA    | 0  | 2  | Not-determined | Genome-fragment | NA    | 0     |
| 56_vs_k141_44165  full    | 1989  | No  | NA    | 1  | 0  | Low-quality    | Genome-fragment | 3.27  | 0     |
| 55_vs_k141_144740  full   | 2877  | No  | NA    | 1  | 1  | Not-determined | Genome-fragment | NA    | 0     |
| S11_vs_k141_60807  full   | 1990  | No  | NA    | 1  | 0  | Low-quality    | Genome-fragment | 3.34  | 0     |
| 55_vs_k141_12818  full    | 2519  | No  | NA    | 0  | 0  | Not-determined | Genome-fragment | NA    | 0     |
| S13_vs_105500  full       | 1990  | No  | NA    | 0  | 1  | Low-quality    | Genome-fragment | 1.92  | 0     |
| 55_vs_k141_72631  full    | 8882  | No  | NA    | 0  | 5  | Not-determined | Genome-fragment | NA    | 0     |
| 55_vs_k141_18380  full    | 1086  | No  | NA    | 0  | 0  | Not-determined | Genome-fragment | NA    | 0     |
| S14_extracted_k141_77853  | 1990  | No  | NA    | 0  | 1  | Low-quality    | Genome-fragment | 0.96  | 0     |
| 55_vs_k141_41776  full    | 1479  | No  | NA    | 0  | 3  | Not-determined | Genome-fragment | NA    | 0     |
| S3_vs_k141_62603  full    | 1990  | No  | NA    | 0  | 0  | Low-quality    | Genome-fragment | 5.27  | 0     |
| 55_vs_k141_62609  full    | 2027  | No  | NA    | 0  | 0  | Not-determined | Genome-fragment | NA    | 0     |
| 55_vs_k141_28451  full    | 1084  | No  | NA    | 0  | 0  | Not-determined | Genome-fragment | NA    | 0     |
| 55_vs_k141_41898  full    | 2814  | No  | NA    | 0  | 2  | Not-determined | Genome-fragment | NA    | 0     |
| S15_vs_18399  full        | 1990  | No  | NA    | 0  | 0  | Low-quality    | Genome-fragment | 5.23  | 0     |
| S8_extracted_k141_78298   | 1990  | No  | NA    | 0  | 0  | Low-quality    | Genome-fragment | 4.77  | 0     |
| S11_extracted_k141_74348  | 1991  | No  | NA    | 0  | 0  | Low-quality    | Genome-fragment | 3.08  | 0     |
| 55_vs_k141_144846  full   | 1767  | No  | NA    | 0  | 2  | Not-determined | Genome-fragment | NA    | 0     |
| S14_vs_k141_89278  full   | 1991  | No  | NA    | 0  | 0  | Low-quality    | Genome-fragment | 1.08  | 0     |
| 55_vs_k141_144855  full   | 2444  | No  | NA    | 0  | 2  | Not-determined | Genome-fragment | NA    | 0     |
| S11_extracted_k141_53048  | 1991  | No  | NA    | 0  | 0  | Low-quality    | Genome-fragment | 3.28  | 0     |
| 55_vs_k141_66468  full    | 2567  | No  | NA    | 0  | 2  | Not-determined | Genome-fragment | NA    | 0     |
| 55_vs_k141_137979  full   | 2229  | No  | NA    | 0  | 2  | Not-determined | Genome-fragment | NA    | 0     |
| S7_extracted_54593        | 1991  | No  | NA    | 1  | 0  | Low-quality    | Genome-fragment | 1.2   | 0     |
| 55_vs_k141_46527  full    | 1228  | No  | NA    | 0  | 0  | Not-determined | Genome-fragment | NA    | 0     |
| 55_vs_k141_72774  full    | 29785 | No  | NA    | 1  | 16 | Not-determined | Genome-fragment | NA    | 0     |
| 56_extracted_k141_30958   | 1991  | No  | NA    | 0  | 0  | Low-quality    | Genome-fragment | 1.98  | 0     |
| 55_vs_k141_13048  full    | 4301  | No  | NA    | 0  | 4  | Not-determined | Genome-fragment | NA    | 0     |
| S17_extracted_k141_117369 | 1992  | No  | NA    | 0  | 0  | Low-quality    | Genome-fragment | 3.36  | 0     |
| 55_vs_k141_83071  full    | 1824  | No  | NA    | 0  | 2  | Not-determined | Genome-fragment | NA    | 0     |
| 55_vs_k141_83075  full    | 1311  | No  | NA    | 0  | 2  | Not-determined | Genome-fragment | NA    | 0     |
| 55_vs_k141_18407  full    | 1956  | No  | NA    | 0  | 1  | Not-determined | Genome-fragment | NA    | 0     |
| 59_vs_k141_27863  full    | 1992  | No  | NA    | 0  | 0  | Low-quality    | Genome-fragment | 1.15  | 0     |
| S11_vs_k141_37764  full   | 1992  | No  | NA    | 1  | 0  | Low-quality    | Genome-fragment | 4.11  | 0     |
| S11_vs_k141_24865  H2gene | 1992  | No  | NA    | 2  | 0  | Low-quality    | Genome-fragment | 5.02  | 0     |
| 55_extracted_k141_84954   | 1992  | No  | NA    | 2  | 0  | Low-quality    | Genome-fragment | 4.35  | 0     |
| 55_vs_k141_83167  full    | 1721  | No  | NA    | 0  | 3  | Not-determined | Genome-fragment |       |       |



|                           |          |       |    |    |    |   |                |                 |    |       |
|---------------------------|----------|-------|----|----|----|---|----------------|-----------------|----|-------|
| SS_vs_k141_77686          | [full]   | 1663  | No | NA | 0  | 1 | Not-determined | Genome-fragment | NA | 0     |
| S1_vs_k141_118219         | [12gene] | 1994  | No | NA | 1  | 0 | Low-quality    | Genome-fragment | NA | 37.73 |
| S8_vs_k141_17803          | [full]   | 1994  | No | NA | 0  | 0 | Low-quality    | Genome-fragment | NA | 5.12  |
| S3_vs_k141_54465          | [full]   | 1995  | No | NA | 1  | 0 | Low-quality    | Genome-fragment | NA | 3.46  |
| S7_vs_91920               | [full]   | 1995  | No | NA | 2  | 0 | Low-quality    | Genome-fragment | NA | 5.82  |
| SS_vs_k141_118231         | [full]   | 2580  | No | NA | 0  | 1 | Not-determined | Genome-fragment | NA | 0     |
| SS_vs_k141_42455          | [full]   | 4310  | No | NA | 0  | 1 | Not-determined | Genome-fragment | NA | 0     |
| S12_extracted_k141_172626 | [full]   | 1995  | No | NA | 2  | 0 | Low-quality    | Genome-fragment | NA | 3.82  |
| SS_vs_k141_17705          | [full]   | 2769  | No | NA | 1  | 0 | Not-determined | Genome-fragment | NA | 0     |
| SS_vs_k141_58766          | [full]   | 20940 | No | NA | 12 | 0 | Medium-quality | Genome-fragment | NA | 51.31 |
| SS_vs_k141_58775          | [full]   | 1511  | No | NA | 0  | 1 | Not-determined | Genome-fragment | NA | 0     |
| SS_vs_k141_145267         | [full]   | 2129  | No | NA | 0  | 0 | Not-determined | Genome-fragment | NA | 0     |
| S8_vs_k141_32430          | [full]   | 1995  | No | NA | 0  | 0 | Low-quality    | Genome-fragment | NA | 3.64  |
| SS_vs_k141_138276         | [full]   | 3795  | No | NA | 0  | 4 | Not-determined | Genome-fragment | NA | 0     |
| SS_vs_k141_28901          | [full]   | 6608  | No | NA | 0  | 4 | Not-determined | Genome-fragment | NA | 0     |
| SS_vs_k141_42501          | [full]   | 3020  | No | NA | 0  | 3 | Not-determined | Genome-fragment | NA | 0     |
| S11_vs_k141_48729         | [full]   | 1996  | No | NA | 2  | 0 | Low-quality    | Genome-fragment | NA | 5.6   |
| S13_vs_76157              | [12gene] | 1996  | No | NA | 1  | 0 | Low-quality    | Genome-fragment | NA | 3.88  |
| S3_extracted_k141_10785   | [full]   | 1996  | No | NA | 0  | 0 | Low-quality    | Genome-fragment | NA | 2.83  |
| SS_extracted_k141_99667   | [full]   | 1996  | No | NA | 2  | 0 | Low-quality    | Genome-fragment | NA | 5.89  |
| SS_vs_k141_58859          | [full]   | 21538 | No | NA | 18 | 0 | Medium-quality | Genome-fragment | NA | 62.86 |
| SS_vs_k141_20329          | [full]   | 1996  | No | NA | 1  | 0 | Low-quality    | Genome-fragment | NA | 4.29  |
| SS_vs_k141_145398         | [full]   | 3260  | No | NA | 0  | 0 | Not-determined | Genome-fragment | NA | 0     |
| SS_vs_k141_77820          | [full]   | 3174  | No | NA | 0  | 3 | Not-determined | Genome-fragment | NA | 0     |
| S14_vs_k141_37619         | [full]   | 1997  | No | NA | 1  | 0 | Low-quality    | Genome-fragment | NA | 1.41  |
| SS_vs_k141_17828          | [full]   | 1481  | No | NA | 0  | 1 | Not-determined | Genome-fragment | NA | 0     |
| SS_vs_k141_28993          | [full]   | 10059 | No | NA | 0  | 6 | Not-determined | Genome-fragment | NA | 0     |
| S1_vs_k141_105669         | [full]   | 1997  | No | NA | 0  | 0 | Low-quality    | Genome-fragment | NA | 2.62  |
| SS_vs_k141_134837         | [full]   | 1997  | No | NA | 0  | 1 | Low-quality    | Genome-fragment | NA | 2.6   |
| SS_vs_k141_29027          | [full]   | 1126  | No | NA | 0  | 1 | Not-determined | Genome-fragment | NA | 0     |
| SS_vs_k141_138450         | [full]   | 4521  | No | NA | 0  | 5 | Not-determined | Genome-fragment | NA | 0     |
| S7_vs_60391               | [full]   | 1997  | No | NA | 0  | 0 | Low-quality    | Genome-fragment | NA | 2.24  |
| S16_vs_75517              | [full]   | 1997  | No | NA | 0  | 0 | Low-quality    | Genome-fragment | NA | 3.2   |
| S10_vs_51294              | [12gene] | 1997  | No | NA | 2  | 0 | Low-quality    | Genome-fragment | NA | 3.89  |
| SS_vs_k141_58869          | [full]   | 1284  | No | NA | 0  | 1 | Not-determined | Genome-fragment | NA | 0     |
| SS_vs_k141_145569         | [full]   | 3658  | No | NA | 0  | 2 | Not-determined | Genome-fragment | NA | 0     |
| SS_vs_k141_138511         | [full]   | 2245  | No | NA | 0  | 1 | Not-determined | Genome-fragment | NA | 0     |
| S12_extracted_k141_70916  | [full]   | 1997  | No | NA | 1  | 0 | Low-quality    | Genome-fragment | NA | 4.1   |
| SS_vs_k141_25113          | [full]   | 1060  | No | NA | 0  | 0 | Not-determined | Genome-fragment | NA | 0     |
| S3_vs_k141_117280         | [full]   | 1998  | No | NA | 3  | 0 | Low-quality    | Genome-fragment | NA | 3.11  |
| SS_vs_k141_83886          | [full]   | 24786 | No | NA | 6  | 0 | Medium-quality | Genome-fragment | NA | 60.38 |
| SS_vs_k141_102736         | [full]   | 1474  | No | NA | 2  | 1 | Not-determined | Genome-fragment | NA | 0     |
| S7_vs_97091               | [full]   | 1998  | No | NA | 1  | 0 | Low-quality    | Genome-fragment | NA | 3.33  |
| S7_vs_125533              | [full]   | 1998  | No | NA | 0  | 0 | Low-quality    | Genome-fragment | NA | 1.07  |
| SS_vs_k141_101829         | [full]   | 1137  | No | NA | 0  | 0 | Not-determined | Genome-fragment | NA | 0     |
| S10_vs_85920              | [full]   | 1998  | No | NA | 0  | 0 | Low-quality    | Genome-fragment | NA | 5.79  |
| S2_vs_k141_7460           | [full]   | 1998  | No | NA | 1  | 0 | Low-quality    | Genome-fragment | NA | 4.56  |
| SS_vs_k141_17887          | [full]   | 1811  | No | NA | 0  | 1 | Not-determined | Genome-fragment | NA | 0     |
| S6_extracted_k141_21422   | [full]   | 1998  | No | NA | 0  | 0 | Low-quality    | Genome-fragment | NA | 6.59  |
| SS_vs_k141_77920          | [full]   | 1884  | No | NA | 0  | 3 | Not-determined | Genome-fragment | NA | 0     |
| S13_vs_85087              | [full]   | 1999  | No | NA | 0  | 0 | Low-quality    | Genome-fragment | NA | 3.46  |
| SS_vs_k141_11890          | [full]   | 2681  | No | NA | 0  | 1 | Not-determined | Genome-fragment | NA | 0     |
| S14_extracted_k141_67156  | [full]   | 1999  | No | NA | 1  | 0 | Low-quality    | Genome-fragment | NA | 6.58  |
| SS_vs_k141_84187          | [full]   | 1154  | No | NA | 0  | 1 | Not-determined | Genome-fragment | NA | 0     |
| S1_extracted_k141_84888   | [full]   | 1999  | No | NA | 1  | 0 | Low-quality    | Genome-fragment | NA | 2.42  |
| S1_vs_k141_78610          | [full]   | 1999  | No | NA | 0  | 0 | Low-quality    | Genome-fragment | NA | 5.73  |
| SS_vs_k141_59417          | [full]   | 2074  | No | NA | 0  | 2 | Not-determined | Genome-fragment | NA | 0     |
| S1_vs_k141_121070         | [12gene] | 1999  | No | NA | 1  | 0 | Low-quality    | Genome-fragment | NA | 2.11  |
| S3_extracted_k141_116484  | [full]   | 1999  | No | NA | 0  | 0 | Low-quality    | Genome-fragment | NA | 2.3   |
| S7_vs_72189               | [full]   | 1999  | No | NA | 0  | 0 | Low-quality    | Genome-fragment | NA | 3.72  |
| S11_extracted_k141_259    | [full]   | 2000  | No | NA | 0  | 0 | Low-quality    | Genome-fragment | NA | 2.81  |
| S13_vs_154095             | [full]   | 2000  | No | NA | 0  | 0 | Low-quality    | Genome-fragment | NA | 3.81  |
| S14_extracted_k141_99476  | [full]   | 2000  | No | NA | 3  | 0 | Low-quality    | Genome-fragment | NA | 4.31  |
| SS_extracted_k141_144416  | [full]   | 2000  | No | NA | 1  | 0 | Low-quality    | Genome-fragment | NA | 2.81  |
| SS_vs_k141_78173          | [full]   | 1794  | No | NA | 0  | 1 | Not-determined | Genome-fragment | NA | 0     |
| SS_vs_k141_79368          | [full]   | 2845  | No | NA | 0  | 0 | Not-determined | Genome-fragment | NA | 0     |
| SS_vs_k141_59598          | [full]   | 11598 | No | NA | 0  | 0 | Not-determined | Genome-fragment | NA | 0     |
| S16_vs_114076             | [full]   | 2000  | No | NA | 0  | 0 | Low-quality    | Genome-fragment | NA | 4.14  |
| SS_vs_k141_138819         | [full]   | 2416  | No | NA | 3  | 1 | Not-determined | Genome-fragment | NA | 0     |
| S10_vs_33293              | [full]   | 2000  | No | NA | 3  | 0 | Low-quality    | Genome-fragment | NA | 4.16  |
| SS_vs_k141_84333          | [full]   | 1120  | No | NA | 0  | 0 | Not-determined | Genome-fragment | NA | 4.48  |
| S10_vs_105862             | [full]   | 2000  | No | NA | 1  | 0 | Low-quality    | Genome-fragment | NA | 1.03  |
| S9_vs_k141_32984          | [full]   | 2001  | No | NA | 0  | 2 | Low-quality    | Genome-fragment | NA | 0     |
| SS_vs_k141_78445          | [full]   | 1932  | No | NA | 0  | 1 | Not-determined | Genome-fragment | NA | 0     |
| S14_vs_k141_45791         | [full]   | 2001  | No | NA | 0  | 0 | Low-quality    | Genome-fragment | NA | 6.49  |
| SS_vs_k141_138919         | [full]   | 1909  | No | NA | 0  | 0 | Not-determined | Genome-fragment | NA | 0     |
| S7_extracted_122133       | [full]   | 2001  | No | NA | 2  | 0 | Low-quality    | Genome-fragment | NA | 6.17  |
| SS_vs_k141_19405          | [full]   | 2597  | No | NA | 0  | 0 | Not-determined | Genome-fragment | NA | 4.2   |
| S7_vs_89470               | [full]   | 2001  | No | NA | 0  | 0 | Low-quality    | Genome-fragment | NA | 4.6   |
| SS_vs_k141_138980         | [full]   | 54544 | No | NA | 19 | 7 | High-quality   | High-quality    | NA | 100   |
| S7_vs_99003               | [full]   | 2001  | No | NA | 2  | 0 | Low-quality    | Genome-fragment | NA | 4.67  |
| SS_vs_k141_19444          | [full]   | 1970  | No | NA | 1  | 0 | Not-determined | Genome-fragment | NA | 0     |
| S12_extracted_k141_72899  | [full]   | 2001  | No | NA | 0  | 0 | Low-quality    | Genome-fragment | NA | 0.37  |
| SS_vs_k141_78660          | [full]   | 1547  | No | NA | 0  | 1 | Not-determined | Genome-fragment | NA | 4.6   |
| SS_vs_k141_59480          | [full]   | 2001  | No | NA | 0  | 0 | Low-quality    | Genome-fragment | NA | 0.94  |
| S17_vs_k141_13650         | [full]   | 2002  | No | NA | 0  | 2 | Low-quality    | Genome-fragment | NA | 0     |
| S14_vs_k141_68986         | [12gene] | 2002  | No | NA | 1  | 0 | Low-quality    | Genome-fragment | NA | 4.17  |
| SS_vs_k141_19506          | [full]   | 2626  | No | NA | 0  | 2 | Not-determined | Genome-fragment | NA | 1.5   |
| S1_vs_k141_14608          | [full]   | 2002  | No | NA | 0  | 0 | Low-quality    | Genome-fragment | NA | 5.8   |
| SS_extracted_k141_761     | [full]   | 2002  | No | NA | 2  | 0 | Low-quality    | Genome-fragment | NA | 87.96 |
| SS_vs_k141_59798          | [full]   | 40187 | No | NA | 26 | 0 | Medium-quality | Genome-fragment | NA | 4.66  |
| S7_extracted_109880       | [full]   | 2002  | No | NA | 1  | 0 | Low-quality    | Genome-fragment | NA | 3.38  |
| S7_vs_23759               | [full]   | 2002  | No | NA | 0  | 1 | Low-quality    | Genome-fragment | NA | 0     |
| SS_vs_k141_59826          | [full]   | 1160  | No | NA | 0  | 1 | Not-determined | Genome-fragment | NA | 0     |
| SS_vs_k141_102337         | [full]   | 1939  | No | NA | 0  | 1 | Not-determined | Genome-fragment | NA | 0     |
| SS_vs_k141_29622          | [full]   | 1847  | No | NA | 0  | 1 | Not-determined | Genome-fragment | NA | 0     |
| S7_vs_24695               | [full]   | 2002  | No | NA | 0  | 0 | Low-quality    | Genome-fragment | NA | 3.42  |
| S7_vs_57191               | [full]   | 2002  | No | NA | 0  | 0 | Low-quality    | Genome-fragment | NA | 4.75  |
| S7_vs_58621               | [full]   | 2002  | No | NA | 0  | 0 | Low-quality    | Genome-fragment | NA | 3.87  |
| S7_vs_59575               | [12gene] | 2002  | No | NA | 1  | 0 | Low-quality    | Genome-fragment | NA | 4.57  |
| SS_vs_k141_14604          | [12gene] | 2002  | No | NA | 2  | 0 | Low-quality    | Genome-fragment | NA | 1.27  |
| SS_vs_k141_14601          | [full]   | 2002  | No | NA | 0  | 2 | Low-quality    | Genome-fragment | NA | 0     |
| SS_vs_k141_59890          | [full]   | 2530  | No | NA | 0  | 2 | Not-determined | Genome-fragment | NA | 96    |
| SS_vs_k141_84574          | [full]   | 36270 | No | NA | 6  | 2 | High-quality   | High-quality    | NA | 0     |
| SS_vs_k141_78892          | [full]   | 5521  | No | NA | 1  | 1 | Not-determined | Genome-fragment | NA | 0     |
| SS_vs_k141_84580          | [full]   | 1073  | No | NA | 0  | 0 | Not-determined | Genome-fragment | NA | 0     |
| S8_vs_k141_94644          | [full]   | 2002  | No | NA | 0  | 1 | Low-quality    | Genome-fragment | NA | 3.23  |
| S11_extracted_k141_12076  | [full]   | 2003  | No | NA | 1  | 0 | Low-quality    | Genome-fragment | NA | 0.69  |
| S1_extracted_k141_141441  | [full]   | 2003  | No | NA | 0  | 0 | Not-determined | Genome-fragment | NA | 4.89  |
| SS_vs_k141_139130         | [full]   | 4487  | No | NA | 0  | 0 | Not-determined | Genome-fragment | NA | 0.97  |
| S1_vs_k141_8294           | [full]   | 2003  | No | NA | 0  | 2 | Low-quality    | Genome-fragment | NA | 4.03  |
| S1_vs_k141_13138          | [full]   | 2003  | No | NA | 1  | 0 | Low-quality    | Genome-fragment | NA | 4.03  |
| S4_extracted_12575        | [full]   | 2003  | No | NA | 0  | 0 | Low-quality    | Genome-fragment | NA | 4.63  |
| SS_vs_k141_60028          | [full]   | 1697  | No | NA | 0  | 2 | Not-determined | Genome-fragment | NA | 4.63  |
| SS_vs_k141_18484          | [full]   | 2003  | No | NA | 0  | 0 | Low-quality    | Genome-fragment | NA | 0     |
| SS_vs_k141_102558         | [full]   | 1619  | No | NA | 0  | 0 | Not-determined | Genome-fragment | NA | 4.76  |
| S11_vs_k141_69309         | [full]   | 2004  | No | NA | 1  | 0 | Low-quality    | Genome-fragment | NA | 4.17  |
| SS_vs_k141_2991           | [full]   | 1071  | No | NA | 0  | 0 | Not-determined | Genome-fragment | NA | 3.86  |
| S1_extracted_k141_129456  | [full]   | 2004  | No | NA | 0  | 1 | Low-quality    | Genome-fragment | NA | 3.06  |
| S1_vs_k141_122821         | [full]   | 2004  | No | NA | 0  | 0 | Low-quality    | Genome-fragment | NA | 3.14  |
| SS_vs_k141_132308         | [full]   | 2004  | No | NA | 1  | 0 | Low-quality    | Genome-fragment | NA | 4.82  |
| S8_extracted_k141_62923   | [full]   | 2004  | No | NA | 0  | 0 | Low-quality    | Genome-fragment | NA | 2.76  |
| S11_vs_k141_87095         | [full]   | 2005  | No | NA | 1  | 0 | Low-quality    | Genome-fragment | NA | 1.55  |
| SS_vs_k141_7764           | [full]   | 2005  | No | NA | 0  | 1 | Low-quality    | Genome-fragment | NA | 3.13  |
| SS_vs_k141_30074          | [full]   | 2003  | No | NA | 0  | 0 | Not-determined | Genome-fragment | NA | 6.61  |
| S16_vs_59858              | [full]   | 2005  | No | NA | 0  | 1 | Low-quality    | Genome-fragment | NA | 100   |
| S12_vs_k141_85420         | [full]   | 2005  | No | NA | 0  | 0 | Low-quality    | Genome-fragment | NA | 4.78  |
| SS_vs_k141_60163          | [full]   | 3720  | No | NA | 0  | 2 | Not-determined | Genome-fragment | NA | 0     |
| S17_extracted_k141_116040 | [full]   | 2006  | No | NA | 2  | 0 | Low-quality    | Genome-fragment | NA | 5.59  |
| SS_vs_k141_84946          | [full]   | 35711 | No | NA | 19 | 2 | High-quality   | High-quality    | NA | 2.76  |
| SS_vs_k141_80994          | [full]   | 2323  | No | NA | 0  | 1 | Not-determined | Genome-fragment | NA | 4.33  |
| S9_vs_k141_60754          | [full]   | 2006  | No | NA | 0  | 0 | Low-quality    | Genome-fragment | NA | 4.26  |
| SS_vs_k141_84982          | [full]   | 8391  | No | NA | 0  | 5 | Not-determined | Genome-fragment | NA | 76.93 |
| SS_vs_k141_102781         | [full]   | 1342  | No | NA | 0  | 1 | Not-determined | Genome-fragment | NA | 0     |
| SS_vs_k141_60230          | [full]   | 1423  | No | NA | 0  | 1 | Not-determined | Genome-fragment | NA | 0     |
| SS_vs_k141_84996          | [full]   | 1290  | No | NA | 0  | 0 | Not-determined | Genome-fragment | NA | 2.2   |
| S11_extracted_k141_93996  | [full]   | 2006  | No | NA | 0  | 1 | Low-quality    | Genome-fragment | NA |       |



|                              |       |     |       |   |    |                |                 |     |       |       |
|------------------------------|-------|-----|-------|---|----|----------------|-----------------|-----|-------|-------|
| SS_vs_k141_86751  0_partial  | 12590 | No  | NA    | 0 | 7  | Not-determined | Genome-fragment | NA  | 0     | 0     |
| S10_vs_k141_19451  full      | 2008  | No  | NA    | 0 | 1  | Low-quality    | Genome-fragment | NA  | 2.32  | 0     |
| S12_vs_k141_148103  full     | 2008  | No  | NA    | 1 | 0  | Low-quality    | Genome-fragment | NA  | 4.79  | 0     |
| SS_vs_k141_12820  0_partial  | 19314 | No  | NA    | 0 | 6  | Not-determined | Genome-fragment | NA  | 0     | 0     |
| SS_vs_k141_38380  0_partial  | 15548 | No  | NA    | 0 | 5  | Not-determined | Genome-fragment | NA  | 4.59  | 0     |
| SS_vs_k141_74189  0_partial  | 30526 | Yes | 25814 | 3 | 4  | Medium-quality | Genome-fragment | NA  | 62.06 | 15.3  |
| SS_vs_k141_93704  0_partial  | 14816 | No  | NA    | 0 | 6  | Not-determined | Genome-fragment | NA  | 0     | 0     |
| SS_vs_k141_11394  0_partial  | 33314 | No  | NA    | 0 | 21 | Not-determined | Genome-fragment | NA  | 0     | 0     |
| SS_vs_k141_17675  full       | 2008  | No  | NA    | 0 | 1  | Low-quality    | Genome-fragment | NA  | 1.88  | 0     |
| SS_vs_k141_141661  0_partial | 13979 | No  | NA    | 0 | 2  | Not-determined | Genome-fragment | NA  | 0     | 0     |
| S17_vs_k141_31144  full      | 2009  | No  | NA    | 1 | 0  | Low-quality    | Genome-fragment | NA  | 3.58  | 0     |
| S17_vs_k141_54226  full      | 2009  | No  | NA    | 1 | 0  | Low-quality    | Genome-fragment | NA  | 4.8   | 0     |
| S14_extracted_k141_78432     | 2009  | No  | NA    | 2 | 0  | Low-quality    | Genome-fragment | NA  | 4.86  | 0     |
| S11_extracted_k141_130411    | 2009  | No  | NA    | 0 | 1  | Low-quality    | Genome-fragment | NA  | 1.01  | 0     |
| S3_extracted_k141_89611      | 2009  | No  | NA    | 2 | 0  | Low-quality    | Genome-fragment | NA  | 5.11  | 0     |
| SS_vs_k141_108624  0_partial | 13968 | No  | NA    | 0 | 8  | Not-determined | Genome-fragment | NA  | 0     | 0     |
| SS_vs_k141_27258  0_partial  | 20858 | No  | NA    | 0 | 6  | Not-determined | Genome-fragment | NA  | 0     | 0     |
| S7_extracted_108648          | 2009  | No  | NA    | 0 | 0  | Low-quality    | Genome-fragment | NA  | 3.55  | 0     |
| S7_vs_69414  full            | 2009  | No  | NA    | 0 | 1  | Low-quality    | Genome-fragment | NA  | 4.5   | 0     |
| SS_vs_k141_65490  0_partial  | 35560 | Yes | 19595 | 2 | 8  | High-quality   | High-quality    | 100 | 44.9  | 0     |
| S10_vs_50362  full           | 2009  | No  | NA    | 1 | 0  | Low-quality    | Genome-fragment | NA  | 3.16  | 0     |
| SS_vs_k141_76500  0_partial  | 64407 | No  | NA    | 7 | 7  | Medium-quality | Genome-fragment | NA  | 85.82 | 0     |
| S8_vs_k141_138749  full      | 2009  | No  | NA    | 1 | 0  | Low-quality    | Genome-fragment | NA  | 4.79  | 0     |
| S17_extracted_k141_126331    | 2010  | No  | NA    | 1 | 0  | Low-quality    | Genome-fragment | NA  | 2.48  | 0     |
| S17_vs_k141_72210  full      | 2010  | No  | NA    | 0 | 0  | Low-quality    | Genome-fragment | NA  | 4.22  | 0     |
| SS_vs_k141_10407  1 2gene    | 1838  | No  | NA    | 0 | 1  | Not-determined | Genome-fragment | NA  | 0     | 0     |
| S3_extracted_k141_81117      | 2010  | No  | NA    | 0 | 0  | Low-quality    | Genome-fragment | NA  | 3.46  | 0     |
| SS_vs_k141_97302  full       | 2010  | No  | NA    | 0 | 0  | Low-quality    | Genome-fragment | NA  | 4.54  | 0     |
| SS_vs_k141_45927  full       | 2010  | No  | NA    | 0 | 1  | Low-quality    | Genome-fragment | NA  | 1.93  | 0     |
| S8_vs_k141_160296  full      | 2010  | No  | NA    | 3 | 0  | Low-quality    | Genome-fragment | NA  | 4.46  | 0     |
| S17_vs_k141_148653  full     | 2011  | No  | NA    | 0 | 0  | Low-quality    | Genome-fragment | NA  | 2.15  | 0     |
| S9_vs_k141_76102  full       | 2011  | No  | NA    | 0 | 0  | Low-quality    | Genome-fragment | NA  | 4.35  | 0     |
| S11_vs_k141_77599  full      | 2011  | No  | NA    | 0 | 1  | Low-quality    | Genome-fragment | NA  | 2.28  | 0     |
| S11_vs_k141_101689  1 2gene  | 2011  | No  | NA    | 1 | 0  | Low-quality    | Genome-fragment | NA  | 1.39  | 0     |
| S14_vs_k141_26901  full      | 2011  | No  | NA    | 2 | 0  | Low-quality    | Genome-fragment | NA  | 5.48  | 0     |
| S3_extracted_k141_110291     | 2011  | No  | NA    | 1 | 0  | Low-quality    | Genome-fragment | NA  | 4.39  | 0     |
| S7_vs_15526  full            | 2011  | No  | NA    | 0 | 1  | Low-quality    | Genome-fragment | NA  | 0.45  | 0     |
| S16_vs_2741  full            | 2011  | No  | NA    | 0 | 1  | Low-quality    | Genome-fragment | NA  | 1.29  | 0     |
| S10_vs_44037  full           | 2011  | No  | NA    | 1 | 0  | Low-quality    | Genome-fragment | NA  | 2.13  | 0     |
| S12_extracted_k141_155477    | 2011  | No  | NA    | 0 | 1  | Low-quality    | Genome-fragment | NA  | 1.28  | 0     |
| S8_vs_k141_104446  full      | 2011  | No  | NA    | 0 | 1  | Low-quality    | Genome-fragment | NA  | 1.46  | 0     |
| S17_vs_k141_99212  full      | 2012  | No  | NA    | 0 | 0  | Low-quality    | Genome-fragment | NA  | 1.19  | 0     |
| S11_vs_k141_48382  full      | 2012  | No  | NA    | 2 | 0  | Low-quality    | Genome-fragment | NA  | 3.58  | 0     |
| S13_extracted_54766          | 2012  | No  | NA    | 0 | 0  | Low-quality    | Genome-fragment | NA  | 3.55  | 0     |
| S13_vs_20454  full           | 2012  | No  | NA    | 0 | 1  | Low-quality    | Genome-fragment | NA  | 1.98  | 0     |
| S14_vs_k141_100673  full     | 2012  | No  | NA    | 1 | 0  | Low-quality    | Genome-fragment | NA  | 4.06  | 0     |
| SS_vs_k141_107814  full      | 2012  | No  | NA    | 3 | 0  | Low-quality    | Genome-fragment | NA  | 5.86  | 0     |
| S7_vs_102895  full           | 2012  | No  | NA    | 1 | 0  | Low-quality    | Genome-fragment | NA  | 3.84  | 0     |
| S11_vs_k141_52747  full      | 2013  | No  | NA    | 0 | 0  | Low-quality    | Genome-fragment | NA  | 4.71  | 0     |
| S11_vs_k141_11540  full      | 2013  | No  | NA    | 0 | 0  | Low-quality    | Genome-fragment | NA  | 4.49  | 0     |
| S14_extracted_k141_25409     | 2013  | No  | NA    | 3 | 0  | Low-quality    | Genome-fragment | NA  | 5.29  | 0     |
| S4_extracted_7889            | 2013  | No  | NA    | 1 | 0  | Low-quality    | Genome-fragment | NA  | 5.39  | 0     |
| S17_vs_k141_171548  full     | 2014  | No  | NA    | 0 | 2  | Low-quality    | Genome-fragment | NA  | 0.9   | 0     |
| S9_vs_k141_90864  full       | 2014  | No  | NA    | 0 | 0  | Low-quality    | Genome-fragment | NA  | 4.11  | 0     |
| S11_vs_k141_67844  full      | 2014  | No  | NA    | 0 | 0  | Low-quality    | Genome-fragment | NA  | 4.69  | 0     |
| S11_vs_k141_57048  full      | 2014  | No  | NA    | 0 | 0  | Low-quality    | Genome-fragment | NA  | 5.03  | 0     |
| S14_vs_k141_45217  full      | 2014  | No  | NA    | 0 | 0  | Low-quality    | Genome-fragment | NA  | 1.19  | 0     |
| SS_vs_k141_134276  1 2gene   | 3084  | No  | NA    | 0 | 0  | Not-determined | Genome-fragment | NA  | 0     | 0     |
| S3_vs_k141_113871  full      | 2014  | No  | NA    | 0 | 0  | Low-quality    | Genome-fragment | NA  | 1.03  | 0     |
| SS_vs_k141_134311  1 2gene   | 1661  | No  | NA    | 0 | 0  | Not-determined | Genome-fragment | NA  | 0     | 0     |
| SS_vs_k141_01546  1 2gene    | 1296  | No  | NA    | 0 | 0  | Not-determined | Genome-fragment | NA  | 0     | 0     |
| S7_vs_97151  1 2gene         | 2014  | No  | NA    | 0 | 0  | Low-quality    | Genome-fragment | NA  | 0.77  | 0     |
| S10_vs_57385  full           | 2014  | No  | NA    | 0 | 0  | Low-quality    | Genome-fragment | NA  | 3.9   | 0     |
| S12_extracted_k141_67267     | 2014  | No  | NA    | 0 | 1  | Low-quality    | Genome-fragment | NA  | 4.37  | 0     |
| S12_vs_k141_52171  full      | 2014  | No  | NA    | 0 | 2  | Low-quality    | Genome-fragment | NA  | 6.43  | 0     |
| S12_vs_k141_176366  1 2gene  | 2014  | No  | NA    | 1 | 0  | Low-quality    | Genome-fragment | NA  | 3.54  | 0     |
| S8_extracted_k141_119552     | 2014  | No  | NA    | 1 | 0  | Low-quality    | Genome-fragment | NA  | 1.39  | 0     |
| S9_extracted_k141_78432      | 2015  | No  | NA    | 1 | 0  | Low-quality    | Genome-fragment | NA  | 4.96  | 0     |
| S1_vs_k141_143264  full      | 2015  | No  | NA    | 0 | 0  | Low-quality    | Genome-fragment | NA  | 3.27  | 0     |
| S12_extracted_k141_153426    | 2015  | No  | NA    | 0 | 1  | Low-quality    | Genome-fragment | NA  | 4.03  | 0     |
| S12_vs_k141_180598  full     | 2015  | No  | NA    | 1 | 0  | Low-quality    | Genome-fragment | NA  | 5.18  | 0     |
| S6_extracted_k141_30507      | 2015  | No  | NA    | 0 | 0  | Low-quality    | Genome-fragment | NA  | 1.38  | 0     |
| S8_vs_k141_102517  full      | 2015  | No  | NA    | 3 | 0  | Low-quality    | Genome-fragment | NA  | 5.46  | 0     |
| S17_vs_k141_93321  full      | 2016  | Yes | 1451  | 1 | 1  | Low-quality    | Genome-fragment | NA  | 2.09  | 28.03 |
| SS_vs_k141_2151  1 2gene     | 1940  | No  | NA    | 0 | 0  | Not-determined | Genome-fragment | NA  | 0     | 0     |
| S14_extracted_k141_100342    | 2016  | No  | NA    | 7 | 0  | Low-quality    | Genome-fragment | NA  | 6.66  | 0     |
| S14_vs_k141_85272  full      | 2016  | No  | NA    | 1 | 0  | Low-quality    | Genome-fragment | NA  | 4.18  | 0     |
| SS_vs_k141_17092  full       | 2016  | No  | NA    | 0 | 0  | Low-quality    | Genome-fragment | NA  | 3.85  | 0     |
| S7_vs_89006  full            | 2016  | No  | NA    | 0 | 0  | Low-quality    | Genome-fragment | NA  | 2.97  | 0     |
| S10_vs_57054  full           | 2016  | No  | NA    | 0 | 0  | Low-quality    | Genome-fragment | NA  | 2.48  | 0     |
| SS_vs_k141_02439  1 2gene    | 1034  | No  | NA    | 0 | 0  | Not-determined | Genome-fragment | NA  | 4.71  | 0     |
| S2_extracted_k141_142377     | 2016  | No  | NA    | 0 | 0  | Low-quality    | Genome-fragment | NA  | 3.82  | 0     |
| S6_vs_k141_24999  full       | 2016  | No  | NA    | 0 | 0  | Low-quality    | Genome-fragment | NA  | 0.88  | 0     |
| S17_extracted_k141_105439    | 2017  | No  | NA    | 0 | 0  | Low-quality    | Genome-fragment | NA  | 3.42  | 0     |
| S17_vs_k141_10946  full      | 2017  | No  | NA    | 2 | 0  | Low-quality    | Genome-fragment | NA  | 3.19  | 0     |
| S13_vs_17497  full           | 2017  | No  | NA    | 1 | 0  | Low-quality    | Genome-fragment | NA  | 4.77  | 0     |
| S1_vs_k141_63791  1 2gene    | 2017  | No  | NA    | 0 | 0  | Low-quality    | Genome-fragment | NA  | 0     | 0     |
| SS_vs_k141_56056  1 2gene    | 1235  | No  | NA    | 0 | 0  | Not-determined | Genome-fragment | NA  | 0     | 0     |
| SS_vs_k141_124261  1 2gene   | 1678  | No  | NA    | 0 | 0  | Not-determined | Genome-fragment | NA  | 0     | 0     |
| SS_vs_k141_13363  full       | 2017  | No  | NA    | 4 | 0  | Low-quality    | Genome-fragment | NA  | 3.02  | 0     |
| SS_vs_k141_105977  1 2gene   | 1004  | No  | NA    | 0 | 0  | Not-determined | Genome-fragment | NA  | 0     | 0     |
| SS_vs_k141_118153  1 2gene   | 1177  | No  | NA    | 0 | 0  | Not-determined | Genome-fragment | NA  | 0     | 0     |
| S16_extracted_162565         | 2017  | No  | NA    | 0 | 0  | Low-quality    | Genome-fragment | NA  | 3.54  | 0     |
| S10_extracted_58834          | 2017  | No  | NA    | 0 | 2  | Low-quality    | Genome-fragment | NA  | 1.23  | 0     |
| SS_vs_k141_20643  1 2gene    | 1444  | No  | NA    | 0 | 0  | Not-determined | Genome-fragment | NA  | 0     | 0     |
| S12_vs_k141_72744  full      | 2017  | No  | NA    | 0 | 0  | Low-quality    | Genome-fragment | NA  | 3.99  | 0     |
| S8_extracted_k141_68617      | 2017  | No  | NA    | 0 | 1  | Low-quality    | Genome-fragment | NA  | 3.78  | 0     |
| S9_vs_k141_2747  full        | 2018  | No  | NA    | 1 | 0  | Low-quality    | Genome-fragment | NA  | 4.56  | 0     |
| S9_vs_k141_81871  1 2gene    | 2018  | No  | NA    | 0 | 0  | Low-quality    | Genome-fragment | NA  | 2.44  | 0     |
| SS_vs_k141_136355  full      | 2018  | No  | NA    | 0 | 1  | Low-quality    | Genome-fragment | NA  | 2.44  | 0     |
| S7_vs_63719  full            | 2018  | No  | NA    | 0 | 1  | Low-quality    | Genome-fragment | NA  | 1.06  | 0     |
| S12_vs_k141_114198  full     | 2018  | No  | NA    | 0 | 0  | Low-quality    | Genome-fragment | NA  | 0.18  | 0     |
| S11_vs_k141_72737  full      | 2019  | No  | NA    | 0 | 1  | Low-quality    | Genome-fragment | NA  | 3.07  | 0     |
| SS_extracted_k141_33313      | 2019  | No  | NA    | 1 | 0  | Low-quality    | Genome-fragment | NA  | 5.14  | 0     |
| SS_vs_k141_51816  1 2gene    | 1056  | No  | NA    | 0 | 0  | Not-determined | Genome-fragment | NA  | 0     | 0     |
| SS_vs_k141_94053  1 2gene    | 1068  | No  | NA    | 0 | 0  | Not-determined | Genome-fragment | NA  | 0     | 0     |
| S7_vs_68702  full            | 2019  | No  | NA    | 0 | 1  | Low-quality    | Genome-fragment | NA  | 0.51  | 0     |
| S10_vs_57549  full           | 2019  | No  | NA    | 1 | 0  | Low-quality    | Genome-fragment | NA  | 0.86  | 0     |
| S8_extracted_k141_74649      | 2019  | No  | NA    | 0 | 0  | Low-quality    | Genome-fragment | NA  | 6.71  | 0     |
| S1_vs_k141_98032  full       | 2020  | No  | NA    | 2 | 0  | Low-quality    | Genome-fragment | NA  | 4.65  | 0     |
| S3_vs_k141_33954  full       | 2020  | No  | NA    | 0 | 0  | Low-quality    | Genome-fragment | NA  | 2.87  | 0     |
| SS_vs_k141_3931  full        | 2020  | No  | NA    | 0 | 0  | Low-quality    | Genome-fragment | NA  | 2.06  | 0     |
| S7_vs_497  full              | 2020  | No  | NA    | 0 | 0  | Low-quality    | Genome-fragment | NA  | 2.97  | 0     |
| S7_vs_102671  full           | 2020  | No  | NA    | 0 | 2  | Low-quality    | Genome-fragment | NA  | 4.15  | 0     |
| S16_vs_170213  full          | 2020  | No  | NA    | 1 | 0  | Low-quality    | Genome-fragment | NA  | 3.91  | 0     |
| S12_vs_k141_117972  full     | 2020  | No  | NA    | 1 | 0  | Low-quality    | Genome-fragment | NA  | 3.3   | 0     |
| S2_extracted_k141_14988      | 2020  | No  | NA    | 9 | 0  | Low-quality    | Genome-fragment | NA  | 6.67  | 0     |
| S9_vs_k141_65624  full       | 2021  | No  | NA    | 2 | 0  | Low-quality    | Genome-fragment | NA  | 2.75  | 0     |
| S13_vs_52921  full           | 2021  | No  | NA    | 0 | 0  | Low-quality    | Genome-fragment | NA  | 3.56  | 0     |
| S14_vs_k141_59267  full      | 2021  | No  | NA    | 1 | 0  | Low-quality    | Genome-fragment | NA  | 1.25  | 0     |
| SS_vs_k141_52337  1 2gene    | 1474  | No  | NA    | 0 | 1  | Not-determined | Genome-fragment | NA  | 0     | 0     |
| S3_vs_k141_109761  full      | 2021  | No  | NA    | 0 | 0  | Low-quality    | Genome-fragment | NA  | 1.08  | 0     |
| SS_vs_k141_34126  1 2gene    | 1312  | No  | NA    | 0 | 0  | Not-determined | Genome-fragment | NA  | 0     | 0     |
| S7_vs_124950  full           | 2021  | No  | NA    | 0 | 0  | Low-quality    | Genome-fragment | NA  | 5.8   | 0     |
| S10_vs_105091  full          | 2021  | No  | NA    | 0 | 0  | Low-quality    | Genome-fragment | NA  | 2.06  | 0     |
| S14_vs_k141_78961  full      | 2022  | No  | NA    | 0 | 0  | Low-quality    | Genome-fragment | NA  | 15.92 | 0     |
| S5_vs_k141_103971  full      | 2022  | No  | NA    | 0 | 0  | Low-quality    | Genome-fragment | NA  | 6.05  | 0     |
| S7_vs_88901  full            | 2022  | No  | NA    | 0 | 0  | Low-quality    | Genome-fragment | NA  | 4.61  | 0     |
| S7_vs_108795  full           | 2022  | No  | NA    | 1 | 0  | Low-quality    | Genome-fragment | NA  | 4.94  | 0     |
| SS_vs_k141_63896  1 2gene    | 2307  | No  | NA    | 0 | 0  | Not-determined | Genome-fragment | NA  | 0     | 0     |
| S7_vs_122405  full           | 2022  | No  | NA    | 1 | 0  | Low-quality    | Genome-fragment | NA  | 3.99  | 0     |
| S16_vs_41384  full           | 2022  | No  | NA    | 0 | 1  | Low-quality    | Genome-fragment | NA  | 2.44  | 0     |
| S10_extracted_23347          | 2022  | No  | NA    | 0 | 1  | Low-quality    | Genome-fragment | NA  | 3     |       |



|                           |          |       |     |      |    |   |                |                 |       |       |
|---------------------------|----------|-------|-----|------|----|---|----------------|-----------------|-------|-------|
| S11_vs_k141_10578         | [full]   | 2028  | No  | NA   | 0  | 0 | Low-quality    | Genome-fragment | 5.92  | 0     |
| S5_vs_k141_137601         | [H2gene] | 1468  | No  | NA   | 0  | 1 | Not-determined | Genome-fragment | NA    | 0     |
| S5_vs_k141_137619         | [H2gene] | 1162  | No  | NA   | 0  | 1 | Not-determined | Genome-fragment | NA    | 0     |
| S3_vs_k141_108645         | [full]   | 2028  | No  | NA   | 2  | 0 | Low-quality    | Genome-fragment | 5.03  | 0     |
| S5_vs_k141_48240          | [H2gene] | 1041  | No  | NA   | 0  | 0 | Not-determined | Genome-fragment | NA    | 0     |
| S5_vs_k141_12359          | [H2gene] | 1319  | No  | NA   | 0  | 0 | Not-determined | Genome-fragment | NA    | 0     |
| S5_vs_k141_137058         | [full]   | 2028  | No  | NA   | 0  | 0 | Low-quality    | Genome-fragment | 1.09  | 0     |
| S16_extracted_12335       | [full]   | 2028  | No  | NA   | 0  | 2 | Low-quality    | Genome-fragment | 1.65  | 0     |
| S14_extracted_k141_4818   | [full]   | 2029  | No  | NA   | 0  | 1 | Low-quality    | Genome-fragment | 3.55  | 0     |
| S14_vs_k141_83995         | [full]   | 2029  | No  | NA   | 0  | 0 | Low-quality    | Genome-fragment | 5.28  | 0     |
| S16_extracted_159243      | [full]   | 2029  | No  | NA   | 0  | 0 | Low-quality    | Genome-fragment | 2.51  | 0     |
| S10_vs_43284              | [full]   | 2029  | No  | NA   | 0  | 1 | Low-quality    | Genome-fragment | 0.61  | 0     |
| S9_vs_k141_19864          | [full]   | 2030  | No  | NA   | 0  | 0 | Low-quality    | Genome-fragment | 5.55  | 0     |
| S1_vs_k141_24019          | [full]   | 2030  | No  | NA   | 1  | 0 | Low-quality    | Genome-fragment | 5.15  | 0     |
| S5_vs_k141_2933           | [H2gene] | 2366  | No  | NA   | 0  | 1 | Not-determined | Genome-fragment | NA    | 0     |
| S5_vs_k141_55715          | [full]   | 2030  | No  | NA   | 0  | 1 | Low-quality    | Genome-fragment | 3.32  | 0     |
| S5_vs_k141_59626          | [H2gene] | 1655  | No  | NA   | 4  | 0 | Not-determined | Genome-fragment | NA    | 0     |
| S7_extracted_751          | [full]   | 2030  | No  | NA   | 0  | 2 | Low-quality    | Genome-fragment | 1.37  | 0     |
| S12_vs_k141_169828        | [full]   | 2030  | No  | NA   | 0  | 0 | Low-quality    | Genome-fragment | 3.99  | 0     |
| S12_vs_k141_15561         | [full]   | 2030  | No  | NA   | 0  | 2 | Low-quality    | Genome-fragment | 1.61  | 0     |
| S12_vs_k141_168927        | [H2gene] | 2030  | No  | NA   | 1  | 0 | Low-quality    | Genome-fragment | 4.88  | 0     |
| S11_extracted_k141_2084   | [full]   | 2031  | No  | NA   | 0  | 0 | Low-quality    | Genome-fragment | 1.28  | 0     |
| S16_extracted_121594      | [full]   | 2031  | No  | NA   | 1  | 0 | Low-quality    | Genome-fragment | 3.93  | 0     |
| S7_extracted_220          | [full]   | 1498  | No  | NA   | 0  | 1 | Not-determined | Genome-fragment | NA    | 0     |
| S16_vs_78512              | [full]   | 2031  | No  | NA   | 0  | 2 | Low-quality    | Genome-fragment | 1.45  | 0     |
| S7_extracted_364          | [full]   | 1697  | No  | NA   | 0  | 1 | Not-determined | Genome-fragment | NA    | 0     |
| S7_extracted_370          | [full]   | 4615  | No  | NA   | 0  | 3 | Not-determined | Genome-fragment | NA    | 0     |
| S7_extracted_388          | [full]   | 2375  | No  | NA   | 0  | 1 | Not-determined | Genome-fragment | NA    | 0     |
| S7_extracted_430          | [full]   | 1102  | No  | NA   | 0  | 0 | Not-determined | Genome-fragment | NA    | 0     |
| S10_extracted_90660       | [full]   | 2031  | No  | NA   | 0  | 0 | Low-quality    | Genome-fragment | 2.52  | 0     |
| S1_vs_k141_133765         | [full]   | 2032  | No  | NA   | 1  | 0 | Low-quality    | Genome-fragment | 4.18  | 0     |
| S1_vs_k141_156096         | [full]   | 2032  | No  | NA   | 1  | 1 | Low-quality    | Genome-fragment | 4.6   | 0     |
| S7_vs_99993               | [full]   | 2032  | No  | NA   | 0  | 0 | Low-quality    | Genome-fragment | 6.26  | 0     |
| S10_extracted_57053       | [full]   | 2032  | No  | NA   | 0  | 0 | Low-quality    | Genome-fragment | 1.53  | 0     |
| S7_extracted_700          | [full]   | 1396  | No  | NA   | 0  | 1 | Not-determined | Genome-fragment | NA    | 0     |
| S7_extracted_748          | [full]   | 2238  | No  | NA   | 0  | 0 | Not-determined | Genome-fragment | NA    | 0     |
| S2_extracted_k141_12999   | [full]   | 2032  | No  | NA   | 1  | 0 | Low-quality    | Genome-fragment | 5.22  | 0     |
| S8_extracted_k141_191556  | [full]   | 2032  | No  | NA   | 7  | 0 | Low-quality    | Genome-fragment | 6.68  | 0     |
| S9_vs_k141_12343          | [full]   | 2033  | No  | NA   | 2  | 0 | Low-quality    | Genome-fragment | 1.44  | 0     |
| S7_extracted_1108         | [full]   | 4484  | No  | NA   | 0  | 1 | Not-determined | Genome-fragment | NA    | 0     |
| S7_extracted_1124         | [full]   | 1115  | No  | NA   | 0  | 0 | Not-determined | Genome-fragment | NA    | 0     |
| S7_extracted_1194         | [full]   | 4740  | No  | NA   | 0  | 1 | Not-determined | Genome-fragment | NA    | 0     |
| S9_vs_k141_79493          | [full]   | 2033  | No  | NA   | 0  | 0 | Low-quality    | Genome-fragment | 4.6   | 0     |
| S7_extracted_1483         | [full]   | 1187  | No  | NA   | 0  | 1 | Not-determined | Genome-fragment | NA    | 0     |
| S7_extracted_1646         | [full]   | 1479  | No  | NA   | 0  | 0 | Not-determined | Genome-fragment | NA    | 0     |
| S7_extracted_1652         | [full]   | 3675  | No  | NA   | 0  | 2 | Not-determined | Genome-fragment | NA    | 0     |
| S11_extracted_k141_11701  | [full]   | 2033  | No  | NA   | 0  | 0 | Low-quality    | Genome-fragment | 4.54  | 0     |
| S7_extracted_1792         | [full]   | 5243  | No  | NA   | 0  | 0 | Not-determined | Genome-fragment | NA    | 0     |
| S7_extracted_1811         | [full]   | 2588  | No  | NA   | 0  | 0 | Not-determined | Genome-fragment | NA    | 0     |
| S11_vs_k141_75480         | [full]   | 2033  | No  | NA   | 1  | 0 | Low-quality    | Genome-fragment | 6.09  | 0     |
| S16_vs_11647              | [full]   | 2033  | No  | NA   | 3  | 0 | Low-quality    | Genome-fragment | 4.68  | 0     |
| S7_extracted_2096         | [full]   | 2428  | No  | NA   | 3  | 2 | Not-determined | Genome-fragment | NA    | 0     |
| S7_extracted_2234         | [full]   | 2351  | No  | NA   | 0  | 3 | Not-determined | Genome-fragment | NA    | 0     |
| S10_vs_51415              | [full]   | 2033  | No  | NA   | 0  | 0 | Low-quality    | Genome-fragment | 3.2   | 0     |
| S7_extracted_2390         | [full]   | 5170  | No  | NA   | 0  | 5 | Not-determined | Genome-fragment | NA    | 0     |
| S7_extracted_2703         | [full]   | 1571  | No  | NA   | 0  | 2 | Not-determined | Genome-fragment | NA    | 0     |
| S8_extracted_k141_162884  | [full]   | 2033  | No  | NA   | 1  | 0 | Low-quality    | Genome-fragment | 4.67  | 0     |
| S7_extracted_2846         | [full]   | 1053  | No  | NA   | 0  | 1 | Not-determined | Genome-fragment | NA    | 0     |
| S7_extracted_2873         | [full]   | 1285  | No  | NA   | 0  | 1 | Not-determined | Genome-fragment | NA    | 0     |
| S7_extracted_2876         | [full]   | 12800 | No  | NA   | 0  | 9 | Not-determined | Genome-fragment | NA    | 0     |
| S7_extracted_2903         | [full]   | 1062  | No  | NA   | 0  | 2 | Not-determined | Genome-fragment | NA    | 0     |
| S7_extracted_3040         | [full]   | 4378  | No  | NA   | 0  | 0 | Not-determined | Genome-fragment | NA    | 0     |
| S3_vs_k141_21012          | [full]   | 2034  | No  | NA   | 1  | 0 | Low-quality    | Genome-fragment | 3.21  | 0     |
| S7_extracted_3118         | [full]   | 1260  | No  | NA   | 0  | 0 | Not-determined | Genome-fragment | NA    | 0     |
| S7_vs_64849               | [full]   | 2034  | No  | NA   | 0  | 0 | Low-quality    | Genome-fragment | 4.52  | 0     |
| S7_extracted_3255         | [full]   | 1235  | No  | NA   | 0  | 0 | Not-determined | Genome-fragment | NA    | 0     |
| S7_extracted_3298         | [full]   | 1233  | No  | NA   | 0  | 1 | Not-determined | Genome-fragment | NA    | 0     |
| S7_extracted_3482         | [full]   | 1174  | No  | NA   | 0  | 0 | Not-determined | Genome-fragment | NA    | 0     |
| S7_extracted_3593         | [full]   | 2177  | No  | NA   | 0  | 2 | Not-determined | Genome-fragment | NA    | 0     |
| S7_extracted_3719         | [full]   | 1403  | No  | NA   | 0  | 1 | Not-determined | Genome-fragment | NA    | 0     |
| S16_extracted_60770       | [full]   | 2034  | No  | NA   | 0  | 0 | Low-quality    | Genome-fragment | 3.24  | 0     |
| S7_extracted_3785         | [full]   | 1032  | No  | NA   | 0  | 1 | Not-determined | Genome-fragment | NA    | 0     |
| S7_extracted_3815         | [full]   | 8161  | No  | NA   | 0  | 7 | Not-determined | Genome-fragment | NA    | 0     |
| S16_vs_53620              | [full]   | 2034  | No  | NA   | 1  | 0 | Low-quality    | Genome-fragment | 3.26  | 0     |
| S7_extracted_4093         | [full]   | 1158  | No  | NA   | 0  | 0 | Not-determined | Genome-fragment | NA    | 0     |
| S12_vs_k141_126316        | [full]   | 2034  | No  | NA   | 1  | 0 | Low-quality    | Genome-fragment | 5.59  | 0     |
| S7_extracted_4294         | [full]   | 2938  | No  | NA   | 0  | 2 | Not-determined | Genome-fragment | NA    | 0     |
| S7_extracted_4407         | [full]   | 1285  | No  | NA   | 0  | 0 | Not-determined | Genome-fragment | NA    | 0     |
| S12_vs_k141_35171         | [full]   | 2034  | No  | NA   | 2  | 0 | Low-quality    | Genome-fragment | 1.02  | 0     |
| S7_extracted_4720         | [full]   | 5635  | No  | NA   | 0  | 0 | Not-determined | Genome-fragment | NA    | 0     |
| S7_extracted_4803         | [full]   | 3365  | No  | NA   | 0  | 1 | Not-determined | Genome-fragment | NA    | 0     |
| S7_extracted_4815         | [full]   | 2142  | No  | NA   | 0  | 0 | Not-determined | Genome-fragment | NA    | 0     |
| S7_extracted_4819         | [full]   | 3199  | No  | NA   | 0  | 2 | Not-determined | Genome-fragment | NA    | 0     |
| S7_extracted_4887         | [full]   | 2031  | No  | NA   | 0  | 2 | Not-determined | Genome-fragment | NA    | 0     |
| S7_extracted_4999         | [full]   | 7560  | No  | NA   | 0  | 4 | Not-determined | Genome-fragment | NA    | 0     |
| S8_extracted_k141_199617  | [full]   | 2034  | No  | NA   | 0  | 1 | Low-quality    | Genome-fragment | 2.61  | 0     |
| S9_extracted_k141_1798    | [full]   | 2035  | No  | NA   | 2  | 0 | Low-quality    | Genome-fragment | 3.36  | 0     |
| S7_extracted_5375         | [full]   | 1420  | No  | NA   | 0  | 2 | Not-determined | Genome-fragment | NA    | 0     |
| S9_extracted_k141_45010   | [full]   | 2035  | No  | NA   | 0  | 0 | Low-quality    | Genome-fragment | 5.89  | 0     |
| S7_extracted_5439         | [full]   | 50770 | No  | NA   | 22 | 0 | Complete       | High-quality    | 100   | 0     |
| S7_extracted_5462         | [full]   | 1701  | No  | NA   | 0  | 0 | Not-determined | Genome-fragment | NA    | 0     |
| S5_vs_k141_76517          | [full]   | 2035  | No  | NA   | 0  | 0 | Low-quality    | Genome-fragment | 3.44  | 0     |
| S7_extracted_5533         | [full]   | 1481  | No  | NA   | 0  | 1 | Not-determined | Genome-fragment | NA    | 0     |
| S7_extracted_5638         | [full]   | 2417  | No  | NA   | 0  | 1 | Not-determined | Genome-fragment | NA    | 0     |
| S7_extracted_5645         | [full]   | 5615  | No  | NA   | 0  | 1 | Not-determined | Genome-fragment | NA    | 0     |
| S14_extracted_k141_110930 | [full]   | 2035  | No  | NA   | 0  | 1 | Low-quality    | Genome-fragment | 2.12  | 0     |
| S7_extracted_5801         | [full]   | 63941 | No  | NA   | 19 | 4 | Complete       | High-quality    | 100   | 0     |
| S7_vs_109649              | [full]   | 2035  | No  | NA   | 0  | 0 | Low-quality    | Genome-fragment | 0.85  | 0     |
| S7_extracted_5827         | [full]   | 1352  | No  | NA   | 0  | 1 | Not-determined | Genome-fragment | NA    | 0     |
| S7_extracted_5843         | [full]   | 14473 | No  | NA   | 7  | 0 | Medium-quality | Genome-fragment | 84.07 | 0     |
| S16_extracted_23469       | [full]   | 2035  | No  | NA   | 0  | 0 | Low-quality    | Genome-fragment | 3.87  | 0     |
| S8_extracted_k141_80684   | [full]   | 2035  | No  | NA   | 0  | 0 | Low-quality    | Genome-fragment | 6.71  | 0     |
| S8_vs_k141_89805          | [full]   | 2035  | No  | NA   | 0  | 2 | Low-quality    | Genome-fragment | 3.18  | 0     |
| S7_extracted_6461         | [full]   | 1009  | No  | NA   | 0  | 0 | Not-determined | Genome-fragment | NA    | 0     |
| S7_extracted_6559         | [full]   | 4153  | No  | NA   | 0  | 1 | Not-determined | Genome-fragment | NA    | 0     |
| S17_vs_k141_120473        | [full]   | 2036  | No  | NA   | 0  | 2 | Low-quality    | Genome-fragment | 1.32  | 0     |
| S7_extracted_6673         | [full]   | 1112  | No  | NA   | 0  | 0 | Not-determined | Genome-fragment | NA    | 0     |
| S7_extracted_6699         | [full]   | 1353  | No  | NA   | 0  | 0 | Not-determined | Genome-fragment | NA    | 0     |
| S7_extracted_6808         | [full]   | 2257  | No  | NA   | 0  | 2 | Not-determined | Genome-fragment | NA    | 0     |
| S7_extracted_7003         | [full]   | 4803  | No  | NA   | 0  | 3 | Not-determined | Genome-fragment | NA    | 0     |
| S13_extracted_58631       | [full]   | 2036  | No  | NA   | 0  | 1 | Low-quality    | Genome-fragment | 2.18  | 0     |
| S16_vs_5605               | [full]   | 2036  | No  | NA   | 0  | 1 | Low-quality    | Genome-fragment | 4.64  | 0     |
| S7_extracted_7175         | [full]   | 4064  | No  | NA   | 0  | 1 | Not-determined | Genome-fragment | NA    | 0     |
| S3_extracted_k141_48561   | [full]   | 2037  | No  | NA   | 0  | 0 | Low-quality    | Genome-fragment | 3.97  | 0     |
| S7_extracted_7221         | [full]   | 3861  | No  | NA   | 0  | 1 | Not-determined | Genome-fragment | NA    | 0     |
| S7_vs_65518               | [full]   | 2037  | No  | NA   | 1  | 0 | Low-quality    | Genome-fragment | 4.78  | 0     |
| S8_vs_k141_97417          | [full]   | 2037  | No  | NA   | 1  | 0 | Low-quality    | Genome-fragment | 4.38  | 0     |
| S7_extracted_7583         | [full]   | 1022  | No  | NA   | 0  | 0 | Not-determined | Genome-fragment | NA    | 0     |
| S7_extracted_7599         | [full]   | 10077 | No  | NA   | 0  | 0 | Not-determined | Genome-fragment | NA    | 0     |
| S7_extracted_7647         | [full]   | 1042  | No  | NA   | 0  | 0 | Not-determined | Genome-fragment | NA    | 0     |
| S7_extracted_7716         | [full]   | 1237  | No  | NA   | 0  | 2 | Not-determined | Genome-fragment | NA    | 0     |
| S11_vs_k141_37795         | [full]   | 2038  | No  | NA   | 0  | 0 | Low-quality    | Genome-fragment | 5.43  | 0     |
| S7_extracted_7760         | [full]   | 1241  | No  | NA   | 0  | 1 | Not-determined | Genome-fragment | NA    | 0     |
| S7_extracted_7795         | [full]   | 2945  | No  | NA   | 0  | 1 | Not-determined | Genome-fragment | NA    | 0     |
| S7_extracted_7859         | [full]   | 1683  | No  | NA   | 0  | 1 | Not-determined | Genome-fragment | NA    | 0     |
| S7_extracted_7891         | [full]   | 1378  | No  | NA   | 0  | 0 | Not-determined | Genome-fragment | NA    | 0     |
| S1_vs_k141_70597          | [full]   | 2038  | No  | NA   | 0  | 0 | Low-quality    | Genome-fragment | 3.43  | 0     |
| S7_extracted_7969         | [full]   | 4856  | No  | NA   | 0  | 2 | Not-determined | Genome-fragment | NA    | 0     |
| S7_extracted_7988         | [full]   | 1529  | No  | NA   | 0  | 2 | Not-determined | Genome-fragment | NA    | 0     |
| S7_extracted_8069         | [full]   | 4867  | No  | NA   | 0  | 2 | Not-determined | Genome-fragment | NA    | 0     |
| S7_extracted_8104         | [full]   | 1759  | No  | NA   | 0  | 0 | Not-determined | Genome-fragment | NA    | 0     |
| S5_vs_k141_47555          | [full]   | 2038  | No  | NA   | 1  | 0 | Low-quality    | Genome-fragment | 4.08  | 0     |
| S7_extracted_8155         | [full]   | 1018  | No  | NA   | 0  | 0 | Not-determined | Genome-fragment | NA    | 0     |
| S7_extracted_8332         | [full]   | 31505 | No  | NA   | 17 | 0 | Medium-quality | Genome-fragment | 81.6  | 0     |
| S7_extracted_8518         | [full]   | 1155  | No  | NA   | 0  | 2 | Not-determined | Genome-fragment | NA    | 0     |
| S7_extracted_8522         | [full]   | 1261  | No  | NA   | 0  | 0 | Not-determined | Genome-fragment | NA    | 0     |
| S7_extracted_8557         | [full]   | 1014  | No  | NA   | 0  | 0 | Not-determined | Genome-fragment | NA    | 0     |
| S7_extracted_8578         | [full]   | 3675  | No  | NA   | 0  | 0 | Not-determined | Genome-fragment | NA    | 0     |
| S16_vs_55071              | [full]   | 2038  | Yes | 1018 | 1  | 1 | Low-quality    | Genome-fragment | 1.81  | 50.05 |
| S7_extracted_8648         | [full]   | 4176  | No  | NA   | 0  | 0 | Not-determined | Genome-fragment | NA    | 0     |
| S7_extracted_8922         | [full]   | 1340  | No  | NA   | 0  | 0 | Not-determined | Genome-fragment | NA    | 0     |
|                           |          |       |     |      |    |   |                |                 |       |       |



|                           |          |    |      |   |                |                    |       |       |
|---------------------------|----------|----|------|---|----------------|--------------------|-------|-------|
| 59_extracted_k141_31551   | 2041 No  | NA | 0    | 1 | Low-quality    | Genome-fragment    | 3.41  | 0     |
| 53_vs_k141_53407  full    | 2041 No  | NA | 0    | 1 | Low-quality    | Genome-fragment    | 2.33  | 0     |
| 57_extracted_11437        | 1416 No  | NA | 0    | 0 | Not-determined | Genome-fragment NA | 0     | 0     |
| 57_extracted_11458        | 2064 No  | NA | 0    | 0 | Not-determined | Genome-fragment NA | 0     | 0     |
| 57_extracted_11460        | 4591 No  | NA | 0    | 5 | Not-determined | Genome-fragment NA | 0     | 0     |
| 57_extracted_103924       | 2041 No  | NA | 2    | 0 | Low-quality    | Genome-fragment    | 3.59  | 0     |
| 515_vs_76010  full        | 2041 No  | NA | 0    | 2 | Low-quality    | Genome-fragment    | 2.86  | 0     |
| 57_extracted_11726        | 1916 No  | NA | 0    | 1 | Not-determined | Genome-fragment NA | 0     | 0     |
| 57_extracted_11744        | 18970 No | NA | 0    | 0 | Medium-quality | Genome-fragment    | 61.7  | 0     |
| 57_extracted_11902        | 1388 No  | NA | 0    | 0 | Not-determined | Genome-fragment NA | 0     | 0     |
| 57_extracted_11936        | 4497 No  | NA | 0    | 2 | Not-determined | Genome-fragment NA | 0     | 0     |
| 59_vs_k141_23631  full    | 2042 No  | NA | 0    | 0 | Low-quality    | Genome-fragment    | 5.46  | 0     |
| 57_extracted_12173        | 1383 No  | NA | 0    | 2 | Not-determined | Genome-fragment NA | 0     | 0     |
| 57_extracted_12324        | 4172 No  | NA | 0    | 1 | Not-determined | Genome-fragment NA | 0     | 0     |
| 57_extracted_12378        | 3942 No  | NA | 0    | 2 | Not-determined | Genome-fragment NA | 0     | 0     |
| 59_vs_k141_64122  full    | 2042 No  | NA | 1    | 0 | Low-quality    | Genome-fragment    | 4.66  | 0     |
| 57_extracted_12485        | 3548 No  | NA | 0    | 1 | Not-determined | Genome-fragment NA | 0     | 0     |
| 511_extracted_k141_566    | 2042 No  | NA | 3    | 0 | Low-quality    | Genome-fragment    | 5.04  | 0     |
| 57_extracted_12611        | 1348 No  | NA | 0    | 1 | Not-determined | Genome-fragment NA | 0     | 0     |
| 511_vs_k141_95537  full   | 2042 No  | NA | 2    | 0 | Low-quality    | Genome-fragment    | 15.48 | 0     |
| 57_extracted_12738        | 1041 No  | NA | 0    | 1 | Not-determined | Genome-fragment NA | 0     | 0     |
| 57_extracted_12855        | 1201 No  | NA | 0    | 1 | Not-determined | Genome-fragment NA | 0     | 0     |
| 57_extracted_12919        | 5106 No  | NA | 0    | 1 | Not-determined | Genome-fragment NA | 0     | 0     |
| 514_vs_k141_84002  full   | 2042 No  | NA | 0    | 0 | Low-quality    | Genome-fragment    | 5.47  | 0     |
| 57_extracted_12932        | 1342 No  | NA | 0    | 1 | Not-determined | Genome-fragment NA | 0     | 0     |
| 57_extracted_13044        | 1662 No  | NA | 0    | 1 | Not-determined | Genome-fragment NA | 0     | 0     |
| 57_extracted_13074        | 1472 No  | NA | 0    | 1 | Not-determined | Genome-fragment NA | 0     | 0     |
| 57_extracted_13192        | 1178 No  | NA | 0    | 0 | Not-determined | Genome-fragment NA | 0     | 0     |
| 57_extracted_13269        | 4252 No  | NA | 0    | 3 | Not-determined | Genome-fragment NA | 0     | 0     |
| 57_extracted_13368        | 1032 No  | NA | 0    | 0 | Not-determined | Genome-fragment NA | 0     | 0     |
| 57_extracted_13376        | 1398 No  | NA | 0    | 2 | Not-determined | Genome-fragment NA | 0     | 0     |
| 57_extracted_13425        | 3398 No  | NA | 0    | 2 | Not-determined | Genome-fragment NA | 0     | 0     |
| 51_extracted_k141_26863   | 2042 No  | NA | 3    | 0 | Low-quality    | Genome-fragment    | 3.39  | 0     |
| 57_extracted_13559        | 2129 No  | NA | 0    | 1 | Not-determined | Genome-fragment NA | 0     | 0     |
| 57_extracted_13579        | 2457 No  | NA | 0    | 1 | Not-determined | Genome-fragment NA | 0     | 0     |
| 57_extracted_13614        | 14819 No | NA | 2    | 1 | Complete       | High-quality       | 100   | 0     |
| 57_extracted_13694        | 5930 No  | NA | 0    | 5 | Not-determined | Genome-fragment NA | 0     | 0     |
| 57_extracted_13715        | 1544 No  | NA | 0    | 2 | Not-determined | Genome-fragment NA | 0     | 0     |
| 57_extracted_13740        | 4363 No  | NA | 0    | 2 | Not-determined | Genome-fragment NA | 0     | 0     |
| 53_vs_k141_93276  in2gme  | 2042 No  | NA | 2    | 0 | Low-quality    | Genome-fragment    | 3.08  | 0     |
| 57_vs_48843  full         | 2042 No  | NA | 2    | 0 | Low-quality    | Genome-fragment    | 5.13  | 0     |
| 57_extracted_14012        | 3528 No  | NA | 0    | 3 | Not-determined | Genome-fragment NA | 0     | 0     |
| 510_extracted_6344        | 2042 No  | NA | 1    | 0 | Low-quality    | Genome-fragment    | 3.07  | 0     |
| 57_extracted_14297        | 2230 No  | NA | 0    | 0 | Not-determined | Genome-fragment NA | 0     | 0     |
| 57_extracted_14301        | 1175 No  | NA | 0    | 0 | Not-determined | Genome-fragment NA | 0     | 0     |
| 57_extracted_14538        | 1088 No  | NA | 0    | 2 | Not-determined | Genome-fragment NA | 0     | 0     |
| 510_extracted_63815       | 2042 No  | NA | 0    | 0 | Low-quality    | Genome-fragment    | 2.78  | 0     |
| 57_extracted_14694        | 1743 No  | NA | 0    | 2 | Not-determined | Genome-fragment NA | 0     | 0     |
| 57_extracted_14716        | 1175 No  | NA | 0    | 0 | Not-determined | Genome-fragment NA | 0     | 0     |
| 57_extracted_14936        | 2511 No  | NA | 0    | 1 | Not-determined | Genome-fragment NA | 0     | 0     |
| 57_extracted_15000        | 1580 No  | NA | 0    | 2 | Not-determined | Genome-fragment NA | 0     | 0     |
| 57_extracted_15028        | 2014 No  | NA | 0    | 0 | Not-determined | Genome-fragment NA | 0     | 0     |
| 510_vs_102292  full       | 2042 No  | NA | 0    | 0 | Low-quality    | Genome-fragment    | 4.45  | 0     |
| 57_extracted_15117        | 1479 No  | NA | 0    | 1 | Not-determined | Genome-fragment NA | 0     | 0     |
| 57_extracted_15283        | 1147 No  | NA | 0    | 0 | Not-determined | Genome-fragment NA | 0     | 0     |
| 57_extracted_15316        | 3274 No  | NA | 0    | 1 | Not-determined | Genome-fragment NA | 0     | 0     |
| 57_extracted_15367        | 1221 No  | NA | 0    | 0 | Not-determined | Genome-fragment NA | 0     | 0     |
| 57_extracted_15447        | 1587 No  | NA | 0    | 3 | Not-determined | Genome-fragment NA | 0     | 0     |
| 58_vs_k141_16037  full    | 2042 No  | NA | 0    | 2 | Low-quality    | Genome-fragment    | 1.49  | 0     |
| 517_vs_k141_134039  full  | 2043 No  | NA | 0    | 1 | Low-quality    | Genome-fragment    | 2.5   | 0     |
| 517_vs_k141_93369  full   | 2043 No  | NA | 0    | 2 | Low-quality    | Genome-fragment    | 1.55  | 0     |
| 57_extracted_15597        | 1155 No  | NA | 0    | 1 | Not-determined | Genome-fragment NA | 0     | 0     |
| 514_vs_k141_13027  full   | 2043 No  | NA | 0    | 1 | Low-quality    | Genome-fragment    | 3.5   | 0     |
| 57_extracted_15669        | 5405 No  | NA | 0    | 1 | Not-determined | Genome-fragment NA | 0     | 0     |
| 51_vs_k141_70371  full    | 2043 No  | NA | 0    | 1 | Low-quality    | Genome-fragment    | 3.28  | 0     |
| 512_vs_k141_58894  full   | 2043 No  | NA | 0    | 2 | Low-quality    | Genome-fragment    | 4.66  | 0     |
| 57_extracted_15829        | 1379 No  | NA | 0    | 1 | Not-determined | Genome-fragment NA | 0     | 0     |
| 58_extracted_k141_64409   | 2043 No  | NA | 2    | 0 | Low-quality    | Genome-fragment    | 6.74  | 0     |
| 57_extracted_15980        | 1011 No  | NA | 0    | 0 | Not-determined | Genome-fragment NA | 0     | 0     |
| 58_vs_k141_60814  full    | 2043 No  | NA | 0    | 0 | Low-quality    | Genome-fragment    | 1.83  | 0     |
| 57_extracted_16061        | 8934 No  | NA | 0    | 3 | Not-determined | Genome-fragment NA | 0     | 0     |
| 59_vs_k141_10435  in2gme  | 2044 No  | NA | 0    | 0 | Low-quality    | Genome-fragment    | 5.2   | 0     |
| 511_extracted_k141_66572  | 2044 No  | NA | 1    | 0 | Low-quality    | Genome-fragment    | 3.16  | 0     |
| 57_extracted_16138        | 3556 No  | NA | 0    | 1 | Not-determined | Genome-fragment NA | 0     | 0     |
| 57_extracted_16141        | 1027 No  | NA | 0    | 2 | Not-determined | Genome-fragment NA | 0     | 0     |
| 511_extracted_k141_74444  | 2044 No  | NA | 0    | 0 | Low-quality    | Genome-fragment    | 2.12  | 0     |
| 57_extracted_16204        | 5350 No  | NA | 0    | 1 | Not-determined | Genome-fragment NA | 0     | 0     |
| 57_extracted_16212        | 3856 No  | NA | 0    | 3 | Not-determined | Genome-fragment NA | 0     | 0     |
| 514_vs_k141_16570  full   | 2044 No  | NA | 0    | 0 | Low-quality    | Genome-fragment    | 4.82  | 0     |
| 57_extracted_16246        | 1948 No  | NA | 0    | 0 | Not-determined | Genome-fragment NA | 0     | 0     |
| 51_vs_k141_40934  full    | 2044 No  | NA | 1    | 0 | Low-quality    | Genome-fragment    | 3.41  | 0     |
| 52_vs_105498  full        | 2044 No  | NA | 0    | 0 | Low-quality    | Genome-fragment    | 4.71  | 0     |
| 57_extracted_16409        | 15221 No | NA | 0    | 2 | Not-determined | Genome-fragment NA | 0     | 0     |
| 515_vs_5632  full         | 2044 No  | NA | 0    | 0 | Low-quality    | Genome-fragment    | 4.18  | 0     |
| 515_vs_16633  full        | 2044 No  | NA | 1468 | 2 | Low-quality    | Genome-fragment    | 0.98  | 28.18 |
| 57_extracted_16533        | 5700 No  | NA | 0    | 2 | Not-determined | Genome-fragment NA | 0     | 0     |
| 58_vs_k141_67469  full    | 2044 No  | NA | 1    | 0 | Low-quality    | Genome-fragment    | 4.78  | 0     |
| 58_extracted_k141_168751  | 2045 No  | NA | 0    | 1 | Low-quality    | Genome-fragment    | 3.42  | 0     |
| 517_extracted_k141_174629 | 2046 No  | NA | 0    | 0 | Low-quality    | Genome-fragment    | 3.42  | 0     |
| 57_extracted_16865        | 1171 No  | NA | 0    | 1 | Not-determined | Genome-fragment NA | 0     | 0     |
| 57_extracted_17127        | 2269 No  | NA | 0    | 1 | Not-determined | Genome-fragment NA | 0     | 0     |
| 517_extracted_k141_28924  | 2046 No  | NA | 0    | 0 | Low-quality    | Genome-fragment    | 2.04  | 0     |
| 517_vs_k141_10749  full   | 2046 No  | NA | 1    | 0 | Low-quality    | Genome-fragment    | 3.32  | 0     |
| 514_vs_k141_108002  full  | 2046 No  | NA | 1    | 0 | Low-quality    | Genome-fragment    | 5.27  | 0     |
| 53_vs_k141_39079  full    | 2046 No  | NA | 0    | 0 | Low-quality    | Genome-fragment    | 2.27  | 0     |
| 57_extracted_17470        | 3538 No  | NA | 0    | 2 | Not-determined | Genome-fragment NA | 0     | 0     |
| 57_extracted_17628        | 1196 No  | NA | 0    | 2 | Not-determined | Genome-fragment NA | 0     | 0     |
| 57_extracted_17652        | 1663 No  | NA | 0    | 0 | Not-determined | Genome-fragment NA | 0     | 0     |
| 57_extracted_17677        | 1141 No  | NA | 0    | 0 | Not-determined | Genome-fragment NA | 0     | 0     |
| 57_extracted_17808        | 6070 No  | NA | 0    | 3 | Not-determined | Genome-fragment NA | 0     | 0     |
| 55_vs_k141_14135  full    | 2046 No  | NA | 2    | 0 | Low-quality    | Genome-fragment    | 5.51  | 0     |
| 57_extracted_18002        | 1665 No  | NA | 0    | 1 | Not-determined | Genome-fragment NA | 0     | 0     |
| 57_extracted_18021        | 1085 No  | NA | 0    | 0 | Not-determined | Genome-fragment NA | 0     | 0     |
| 57_extracted_18063        | 6885 No  | NA | 0    | 5 | Not-determined | Genome-fragment NA | 0     | 0     |
| 57_extracted_18066        | 1602 No  | NA | 0    | 1 | Not-determined | Genome-fragment NA | 0     | 0     |
| 57_extracted_18100        | 3990 No  | NA | 0    | 3 | Not-determined | Genome-fragment NA | 0     | 0     |
| 510_vs_2672  full         | 2046 No  | NA | 0    | 0 | Low-quality    | Genome-fragment    | 3.08  | 0     |
| 57_extracted_18183        | 4291 No  | NA | 0    | 1 | Not-determined | Genome-fragment NA | 0     | 0     |
| 57_extracted_18260        | 3539 No  | NA | 0    | 3 | Not-determined | Genome-fragment NA | 0     | 0     |
| 510_vs_55810  full        | 2046 No  | NA | 0    | 0 | Low-quality    | Genome-fragment    | 4.95  | 0     |
| 57_extracted_18620        | 3055 No  | NA | 0    | 0 | Not-determined | Genome-fragment NA | 0     | 0     |
| 58_extracted_k141_185559  | 2046 No  | NA | 0    | 2 | Low-quality    | Genome-fragment    | 1.27  | 0     |
| 517_extracted_k141_154126 | 2047 No  | NA | 0    | 0 | Low-quality    | Genome-fragment    | 3.07  | 0     |
| 517_vs_k141_116691  full  | 2047 No  | NA | 0    | 1 | Low-quality    | Genome-fragment    | 4.7   | 0     |
| 57_extracted_18970        | 2178 No  | NA | 0    | 2 | Not-determined | Genome-fragment NA | 0     | 0     |
| 57_extracted_19040        | 1359 No  | NA | 0    | 0 | Not-determined | Genome-fragment NA | 0     | 0     |
| 57_extracted_19254        | 1445 No  | NA | 0    | 1 | Not-determined | Genome-fragment NA | 0     | 0     |
| 57_extracted_19376        | 1912 No  | NA | 0    | 1 | Not-determined | Genome-fragment NA | 0     | 0     |
| 51_vs_k141_11661  full    | 2047 No  | NA | 2    | 0 | Low-quality    | Genome-fragment    | 4.87  | 0     |
| 57_extracted_19415        | 1026 No  | NA | 0    | 1 | Not-determined | Genome-fragment NA | 0     | 0     |
| 57_extracted_19508        | 1346 No  | NA | 0    | 1 | Not-determined | Genome-fragment NA | 0     | 0     |
| 57_extracted_19762        | 1527 No  | NA | 0    | 1 | Not-determined | Genome-fragment NA | 0     | 0     |
| 53_extracted_k141_81097   | 2047 No  | NA | 1    | 0 | Low-quality    | Genome-fragment    | 6.12  | 0     |
| 51_vs_k141_94924  full    | 2047 No  | NA | 0    | 2 | Low-quality    | Genome-fragment    | 1.15  | 0     |
| 57_extracted_19866        | 16490 No | NA | 0    | 0 | Medium-quality | Genome-fragment    | 74.58 | 0     |
| 57_extracted_20005        | 3148 No  | NA | 0    | 3 | Not-determined | Genome-fragment NA | 0     | 0     |
| 57_extracted_20090        | 5567 No  | NA | 0    | 1 | Not-determined | Genome-fragment NA | 0     | 0     |
| 57_extracted_20129        | 16300 No | NA | 0    | 0 | Medium-quality | Genome-fragment    | 53.36 | 0     |
| 57_extracted_20156        | 1078 No  | NA | 0    | 1 | Not-determined | Genome-fragment NA | 0     | 0     |
| 516_vs_18969  full        | 2047 No  | NA | 2    | 0 | Low-quality    | Genome-fragment    | 1.46  | 0     |
| 57_extracted_20304        | 2757 No  | NA | 0    | 2 | Not-determined | Genome-fragment NA | 0     | 0     |
| 57_extracted_20328        | 1438 No  | NA | 0    | 1 | Not-determined | Genome-fragment NA | 0     | 0     |
| 57_extracted_20368        | 1361 No  | NA | 0    | 1 | Not-determined | Genome-fragment NA | 0     | 0     |
| 57_extracted_20645        | 1853 No  | NA | 0    | 0 | Not-determined | Genome-fragment NA | 0     | 0     |
| 57_extracted_20655        | 2442 No  | NA | 0    | 2 | Not-determined | Genome-fragment NA | 0     | 0     |
| 57_extracted_20679        | 1975 No  | NA | 0    | 1 | Not-determined | Genome-fragment NA | 0     | 0     |
| 57_extracted_20702        | 1337 No  | NA | 0    | 1 | Not-determined | Genome-fragment NA | 0     | 0     |
| 57_extracted_20840        | 1455 No  | NA | 0    | 2 | Not-determined | Genome-fragment NA | 0     | 0     |
| 57_extracted_20998        | 3176 No  | NA | 0    | 1 | Not-determined | Genome-fragment NA | 0     | 0     |
| 57_extracted_21028        | 1344 No  | NA | 0    | 1 | Not-determined | Genome-fragment NA | 0     | 0     |
| 57_extracted_21061        | 1101 No  | NA | 0    | 1 | Not-determined | Genome-fragment NA | 0     | 0     |
| 57_extracted_21066        | 1196 No  | NA | 0    | 1 | Not-determined | Genome-fragment NA | 0     | 0     |
| 56_vs_k141_35143  full    | 2047 No  | NA | 0    | 0 | Low-quality    | Genome-fragment    | 2.96  | 0     |
| 56_vs_k141_44678  full    | 2047 No  | NA | 2    | 0 | Low-quality    | Genome-fragment    | 4.95  | 0     |
| 57_extracted_21164        | 2294 No  | NA | 0    | 1 | Not-determined | Genome-fragment NA | 0     | 0     |
| 517_extracted_k141_21354  | 2048 No  | NA | 0    | 1 | Low-quality    | Genome-fragment    | 2.16  | 0     |
| 57_extracted_21319        | 1428 No  | NA | 0    | 0 | Not-determined | Genome-fragment NA | 0     | 0     |
| 57_extracted_21387        | 1118 No  | NA | 0    | 1 | Not-determined | Genome-fragment NA | 0     | 0     |
| 511_vs_k141_97937  full   | 2048 No  | NA | 1    | 0 | Low-quality    | Genome-fragment    | 2.42  | 0     |
| 53_vs_k141_47455  full    | 2048 No  | NA | 1    | 0 | Low-quality    | Genome-fragment    | 1.19  | 0     |
| 57_vs_137179  full        | 2048 No  | NA | 1    | 0 | Low-quality    | Genome-fragment    | 4.93  | 0     |
| 516_extracted_20881       | 2048 No  | NA | 0    | 1 | Low-quality    | Genome-fragment    | 0.87  | 0     |
| 510_extracted_6838        | 2048 No  | NA | 1    | 0 | Low-quality    | Genome-fragment    | 2.11  | 0     |
| 512_extracted_k141_181789 | 2048 No  | NA | 0    | 1 | Low-quality    | Genome-fragment    | 3.1   | 0     |
| 57_extracted_21554        | 1186 No  |    |      |   |                |                    |       |       |



|                            |       |     |      |    |                |                 |                 |       |       |
|----------------------------|-------|-----|------|----|----------------|-----------------|-----------------|-------|-------|
| 57_extracted_23801         | 4885  | No  | NA   | 0  | 6              | Not-determined  | Genome-fragment | NA    | 0     |
| 57_vs_44278  full          | 2049  | No  | NA   | 0  | 1              | Low-quality     | Genome-fragment | 2.62  | 0     |
| 57_vs_323671  full         | 2049  | No  | NA   | 0  | 0              | Low-quality     | Genome-fragment | 4.91  | 0     |
| 510_vs_81791  full         | 2049  | No  | NA   | 0  | 1              | Low-quality     | Genome-fragment | 5.87  | 0     |
| 57_extracted_23955         | 4319  | No  | NA   | 0  | 0              | Not-determined  | Genome-fragment | NA    | 0     |
| 57_extracted_23987         | 1151  | No  | NA   | 0  | 1              | Not-determined  | Genome-fragment | NA    | 0     |
| 57_extracted_24276         | 3919  | No  | NA   | 0  | 2              | Not-determined  | Genome-fragment | NA    | 0     |
| 57_extracted_24334         | 1866  | No  | NA   | 0  | 0              | Not-determined  | Genome-fragment | NA    | 0     |
| 515_vs_11947  full         | 2049  | No  | NA   | 0  | 0              | Low-quality     | Genome-fragment | 4.09  | 0     |
| 511_vs_k141_5463  full     | 2050  | No  | NA   | 1  | 0              | Low-quality     | Genome-fragment | 4.09  | 0     |
| 51_extracted_k141_36045    | 2050  | No  | NA   | 1  | 0              | Low-quality     | Genome-fragment | 5.34  | 0     |
| 57_extracted_24509         | 9463  | No  | NA   | 0  | 9              | Not-determined  | Genome-fragment | NA    | 0     |
| 57_extracted_24724         | 5005  | No  | NA   | 0  | 3              | Not-determined  | Genome-fragment | NA    | 0     |
| 57_extracted_24820         | 10024 | No  | NA   | 0  | 6              | Not-determined  | Genome-fragment | NA    | 0     |
| 57_extracted_24868         | 1526  | No  | NA   | 0  | 1              | Not-determined  | Genome-fragment | NA    | 0     |
| 57_extracted_24891         | 12818 | No  | NA   | 0  | 26             | Not-determined  | Genome-fragment | NA    | 0     |
| 57_extracted_24934         | 1682  | No  | NA   | 0  | 0              | Not-determined  | Genome-fragment | NA    | 0     |
| 53_vs_k141_44585  full     | 2050  | No  | NA   | 1  | 0              | Low-quality     | Genome-fragment | 1.56  | 0     |
| 55_vs_k141_112847  full    | 2050  | No  | NA   | 0  | 1              | Low-quality     | Genome-fragment | 6.06  | 0     |
| 55_vs_k141_9630  lit2gene  | 2050  | No  | NA   | 2  | 0              | Low-quality     | Genome-fragment | 3.19  | 0     |
| 57_extracted_25570         | 1269  | No  | NA   | 0  | 0              | Not-determined  | Genome-fragment | NA    | 0     |
| 57_extracted_25688         | 1429  | No  | NA   | 0  | 1              | Not-determined  | Genome-fragment | NA    | 0     |
| 57_extracted_25723         | 1069  | No  | NA   | 0  | 0              | Not-determined  | Genome-fragment | NA    | 0     |
| 516_vs_1801  full          | 2050  | No  | NA   | 0  | 1              | Low-quality     | Genome-fragment | 1.57  | 0     |
| 57_extracted_25810         | 1725  | No  | NA   | 0  | 1              | Not-determined  | Genome-fragment | NA    | 0     |
| 57_extracted_25820         | 1151  | No  | NA   | 0  | 1              | Not-determined  | Genome-fragment | NA    | 0     |
| 57_extracted_25836         | 2675  | No  | NA   | 0  | 2              | Not-determined  | Genome-fragment | NA    | 0     |
| 516_vs_62763  full         | 2050  | No  | NA   | 0  | 0              | Low-quality     | Genome-fragment | 1.39  | 0     |
| 57_extracted_25997         | 7783  | No  | NA   | 4  | Not-determined | Genome-fragment | NA              | 0     |       |
| 517_extracted_k141_54755   | 2051  | No  | NA   | 1  | 0              | Low-quality     | Genome-fragment | 3.07  | 0     |
| 57_extracted_26225         | 1719  | No  | NA   | 0  | 0              | Not-determined  | Genome-fragment | NA    | 0     |
| 57_extracted_26339         | 1728  | No  | NA   | 0  | 2              | Not-determined  | Genome-fragment | NA    | 0     |
| 57_extracted_26442         | 3195  | No  | NA   | 0  | 2              | Not-determined  | Genome-fragment | NA    | 0     |
| 57_extracted_26445         | 1427  | No  | NA   | 0  | 1              | Not-determined  | Genome-fragment | NA    | 0     |
| 57_extracted_26587         | 1462  | No  | NA   | 0  | 0              | Not-determined  | Genome-fragment | NA    | 0     |
| 51_vs_k141_114123  full    | 2051  | No  | NA   | 0  | 0              | Low-quality     | Genome-fragment | 4.87  | 0     |
| 57_extracted_26683         | 1197  | No  | NA   | 0  | 1              | Not-determined  | Genome-fragment | NA    | 0     |
| 53_vs_k141_61927  full     | 2051  | No  | NA   | 3  | 0              | Low-quality     | Genome-fragment | 3.35  | 0     |
| 57_extracted_26725         | 1662  | No  | NA   | 2  | Not-determined | Genome-fragment | NA              | 0     |       |
| 57_extracted_26933         | 4672  | No  | NA   | 0  | 2              | Not-determined  | Genome-fragment | NA    | 0     |
| 53_vs_k141_57475  lit2gene | 2051  | No  | NA   | 0  | 0              | Low-quality     | Genome-fragment | 5.57  | 0     |
| 57_extracted_27194         | 1605  | No  | NA   | 2  | Not-determined | Genome-fragment | NA              | 0     |       |
| 516_extracted_44898        | 2051  | No  | NA   | 0  | 2              | Low-quality     | Genome-fragment | 0.25  | 0     |
| 57_extracted_27309         | 34140 | No  | NA   | 13 | 0              | Complete        | High-quality    | 100   | 0     |
| 57_extracted_27321         | 1828  | No  | NA   | 0  | 0              | Not-determined  | Genome-fragment | NA    | 0     |
| 57_extracted_27336         | 1005  | No  | NA   | 0  | 1              | Not-determined  | Genome-fragment | NA    | 0     |
| 57_extracted_27336         | 1161  | No  | NA   | 0  | 1              | Not-determined  | Genome-fragment | NA    | 0     |
| 57_extracted_27360         | 1942  | No  | NA   | 0  | 0              | Not-determined  | Genome-fragment | NA    | 0     |
| 57_extracted_27388         | 1187  | No  | NA   | 0  | 1              | Not-determined  | Genome-fragment | NA    | 0     |
| 57_extracted_27401         | 1364  | No  | NA   | 0  | 1              | Not-determined  | Genome-fragment | NA    | 0     |
| 516_vs_111606  full        | 2051  | No  | NA   | 0  | 0              | Low-quality     | Genome-fragment | 5.23  | 0     |
| 57_extracted_27427         | 2570  | No  | NA   | 0  | 0              | Complete        | High-quality    | 100   | 0     |
| 57_extracted_27469         | 2557  | No  | NA   | 0  | 2              | Not-determined  | Genome-fragment | NA    | 0     |
| 57_extracted_27577         | 4213  | No  | NA   | 0  | 2              | Not-determined  | Genome-fragment | NA    | 0     |
| 57_extracted_27611         | 22590 | No  | NA   | 0  | 2              | Not-determined  | Genome-fragment | NA    | 0     |
| 57_extracted_27721         | 2450  | No  | NA   | 0  | 0              | Not-determined  | Genome-fragment | NA    | 0     |
| 57_extracted_27750         | 1058  | No  | NA   | 0  | 1              | Not-determined  | Genome-fragment | NA    | 0     |
| 57_extracted_27767         | 1711  | No  | NA   | 0  | 0              | Not-determined  | Genome-fragment | NA    | 0     |
| 54_extracted_5349          | 2051  | No  | NA   | 0  | 0              | Low-quality     | Genome-fragment | 6.66  | 0     |
| 517_extracted_k141_61083   | 2052  | No  | NA   | 5  | 0              | Low-quality     | Genome-fragment | 6.77  | 0     |
| 57_extracted_28038         | 2184  | No  | NA   | 0  | 2              | Not-determined  | Genome-fragment | NA    | 0     |
| 57_extracted_28077         | 1021  | No  | NA   | 0  | 1              | Not-determined  | Genome-fragment | NA    | 0     |
| 57_extracted_28282         | 2104  | No  | NA   | 0  | 1              | Not-determined  | Genome-fragment | NA    | 0     |
| 57_extracted_28313         | 1029  | No  | NA   | 0  | 1              | Not-determined  | Genome-fragment | NA    | 0     |
| 517_extracted_k141_2474    | 2052  | No  | NA   | 0  | 1              | Low-quality     | Genome-fragment | 1.25  | 0     |
| 517_extracted_k141_153803  | 2052  | No  | NA   | 0  | 0              | Low-quality     | Genome-fragment | 44.01 | 0     |
| 57_extracted_28380         | 2011  | No  | NA   | 0  | 0              | Not-determined  | Genome-fragment | NA    | 0     |
| 57_extracted_28423         | 3515  | No  | NA   | 0  | 2              | Not-determined  | Genome-fragment | NA    | 0     |
| 57_extracted_28429         | 15661 | No  | NA   | 17 | 0              | Complete        | High-quality    | 100   | 0     |
| 57_extracted_28431         | 1191  | No  | NA   | 0  | 1              | Not-determined  | Genome-fragment | NA    | 0     |
| 517_vs_k141_90029  full    | 2052  | No  | NA   | 0  | 1              | Low-quality     | Genome-fragment | 3.31  | 0     |
| 57_extracted_28693         | 1099  | No  | NA   | 0  | 2              | Not-determined  | Genome-fragment | NA    | 0     |
| 59_vs_k141_51862  full     | 2052  | No  | NA   | 0  | 0              | Low-quality     | Genome-fragment | 5.49  | 0     |
| 511_extracted_k141_80344   | 2052  | No  | NA   | 0  | 0              | Low-quality     | Genome-fragment | 2.48  | 0     |
| 516_extracted_145758       | 2052  | No  | NA   | 0  | 2              | Low-quality     | Genome-fragment | 0.56  | 0     |
| 57_extracted_29019         | 3125  | No  | NA   | 0  | 3              | Not-determined  | Genome-fragment | NA    | 0     |
| 57_extracted_29026         | 1679  | No  | NA   | 0  | 0              | Not-determined  | Genome-fragment | NA    | 0     |
| 57_extracted_29196         | 28259 | No  | NA   | 11 | 1              | Medium-quality  | Genome-fragment | 50.97 | 0     |
| 57_extracted_29282         | 3097  | No  | NA   | 0  | 1              | Not-determined  | Genome-fragment | NA    | 0     |
| 57_extracted_29407         | 2231  | No  | NA   | 0  | 2              | Not-determined  | Genome-fragment | NA    | 0     |
| 57_extracted_29408         | 2112  | No  | NA   | 0  | 1              | Not-determined  | Genome-fragment | NA    | 0     |
| 57_extracted_29439         | 1162  | No  | NA   | 0  | 1              | Not-determined  | Genome-fragment | NA    | 0     |
| 57_extracted_29645         | 1319  | No  | NA   | 0  | 1              | Not-determined  | Genome-fragment | NA    | 0     |
| 512_extracted_k141_17310   | 2052  | No  | NA   | 1  | 0              | Low-quality     | Genome-fragment | 1.27  | 0     |
| 57_extracted_29785         | 1681  | No  | NA   | 0  | 2              | Not-determined  | Genome-fragment | NA    | 0     |
| 57_extracted_29808         | 1025  | No  | NA   | 0  | 1              | Not-determined  | Genome-fragment | NA    | 0     |
| 512_vs_k141_35260  full    | 2052  | No  | NA   | 0  | 1              | Low-quality     | Genome-fragment | 2.34  | 0     |
| 58_vs_k141_13043  full     | 2052  | No  | NA   | 2  | 0              | Low-quality     | Genome-fragment | 4.55  | 0     |
| 59_extracted_k141_88100    | 2053  | No  | NA   | 1  | 0              | Low-quality     | Genome-fragment | 4.82  | 0     |
| 59_vs_k141_58834  full     | 2053  | Yes | 1478 | 1  | 1              | Low-quality     | Genome-fragment | 4.9   | 28.01 |
| 57_extracted_29941         | 19166 | No  | NA   | 36 | 0              | Medium-quality  | Genome-fragment | 63.15 | 0     |
| 57_extracted_29997         | 20506 | No  | NA   | 8  | 1              | Not-determined  | Genome-fragment | NA    | 0     |
| 51_extracted_k141_137865   | 2053  | Yes | 822  | 2  | 2              | Medium-quality  | Genome-fragment | 1.42  | 59.96 |
| 57_extracted_30025         | 2730  | No  | NA   | 0  | 0              | Not-determined  | Genome-fragment | NA    | 0     |
| 51_extracted_k141_23026    | 2053  | No  | NA   | 0  | 0              | Low-quality     | Genome-fragment | 2.1   | 0     |
| 53_extracted_k141_95490    | 2053  | No  | NA   | 0  | 1              | Low-quality     | Genome-fragment | 4.05  | 0     |
| 57_extracted_30083         | 1827  | No  | NA   | 0  | 0              | Not-determined  | Genome-fragment | NA    | 0     |
| 55_vs_k141_13893  full     | 2053  | No  | NA   | 0  | 2              | Low-quality     | Genome-fragment | 2.85  | 0     |
| 512_vs_k141_63568  full    | 2053  | No  | NA   | 0  | 0              | Low-quality     | Genome-fragment | 2.32  | 0     |
| 512_vs_k141_103144  full   | 2053  | No  | NA   | 0  | 0              | Low-quality     | Genome-fragment | 1.22  | 0     |
| 57_extracted_30546         | 1774  | No  | NA   | 0  | 0              | Not-determined  | Genome-fragment | NA    | 0     |
| 57_extracted_30575         | 1750  | No  | NA   | 0  | 1              | Not-determined  | Genome-fragment | NA    | 0     |
| 512_vs_k141_185321  full   | 2053  | No  | NA   | 0  | 0              | Low-quality     | Genome-fragment | 4.21  | 0     |
| 57_extracted_30762         | 1107  | No  | NA   | 0  | 1              | Not-determined  | Genome-fragment | NA    | 0     |
| 57_extracted_30903         | 1748  | No  | NA   | 0  | 1              | Not-determined  | Genome-fragment | NA    | 0     |
| 59_vs_k141_12323  full     | 2054  | No  | NA   | 0  | 0              | Low-quality     | Genome-fragment | 5.67  | 0     |
| 59_vs_k141_70490  full     | 2054  | No  | NA   | 0  | 0              | Low-quality     | Genome-fragment | 2.45  | 0     |
| 57_extracted_31126         | 1058  | No  | NA   | 0  | 1              | Not-determined  | Genome-fragment | NA    | 0     |
| 57_extracted_31276         | 7416  | No  | NA   | 0  | 2              | Not-determined  | Genome-fragment | NA    | 0     |
| 513_vs_18213  full         | 2054  | No  | NA   | 2  | 0              | Low-quality     | Genome-fragment | 3.62  | 0     |
| 57_extracted_31499         | 1382  | No  | NA   | 0  | 1              | Not-determined  | Genome-fragment | NA    | 0     |
| 57_extracted_31546         | 5439  | No  | NA   | 0  | 1              | Not-determined  | Genome-fragment | NA    | 0     |
| 57_extracted_31851         | 1312  | No  | NA   | 0  | 1              | Not-determined  | Genome-fragment | NA    | 0     |
| 57_extracted_32040         | 1394  | No  | NA   | 0  | 1              | Not-determined  | Genome-fragment | NA    | 0     |
| 512_vs_29623  full         | 2054  | No  | NA   | 2  | 0              | Low-quality     | Genome-fragment | 0.98  | 0     |
| 57_extracted_32237         | 1402  | No  | NA   | 0  | 2              | Not-determined  | Genome-fragment | NA    | 0     |
| 55_vs_k141_17680  lit2gene | 2054  | No  | NA   | 1  | 0              | Low-quality     | Genome-fragment | 2.98  | 0     |
| 57_extracted_32296         | 16486 | No  | NA   | 7  | 0              | Medium-quality  | Genome-fragment | 72.1  | 0     |
| 57_extracted_32475         | 1217  | No  | NA   | 0  | 1              | Not-determined  | Genome-fragment | NA    | 0     |
| 57_extracted_32559         | 14766 | No  | NA   | 7  | 0              | Medium-quality  | Genome-fragment | 68.66 | 0     |
| 57_extracted_32784         | 1772  | No  | NA   | 0  | 1              | Not-determined  | Genome-fragment | NA    | 0     |
| 516_vs_14701  full         | 2054  | No  | NA   | 0  | 0              | Low-quality     | Genome-fragment | 4.17  | 0     |
| 57_extracted_32874         | 1435  | No  | NA   | 0  | 1              | Not-determined  | Genome-fragment | NA    | 0     |
| 57_extracted_33221         | 1447  | No  | NA   | 0  | 1              | Not-determined  | Genome-fragment | NA    | 0     |
| 57_extracted_33232         | 2068  | No  | NA   | 0  | 0              | Not-determined  | Genome-fragment | NA    | 0     |
| 57_extracted_33501         | 2042  | No  | NA   | 0  | 0              | Not-determined  | Genome-fragment | NA    | 0     |
| 57_extracted_33627         | 3816  | No  | NA   | 0  | 1              | Not-determined  | Genome-fragment | NA    | 0     |
| 516_vs_105854  lit2gene    | 2054  | No  | NA   | 0  | 0              | Low-quality     | Genome-fragment | 1.42  | 0     |
| 512_extracted_k141_154364  | 2054  | No  | NA   | 0  | 2              | Low-quality     | Genome-fragment | 1.34  | 0     |
| 57_extracted_33716         | 5728  | No  | NA   | 0  | 2              | Not-determined  | Genome-fragment | NA    | 0     |
| 57_extracted_33756         | 2659  | No  | NA   | 0  | 2              | Not-determined  | Genome-fragment | NA    | 0     |
| 515_extracted_41340        | 2054  | No  | NA   | 0  | 0              | Low-quality     | Genome-fragment | 6.53  | 0     |
| 56_vs_k141_41721  full     | 2054  | No  | NA   | 0  | 1              | Low-quality     | Genome-fragment | 0.85  | 0     |
| 57_extracted_34008         | 1630  | No  | NA   | 0  | 0              | Not-determined  | Genome-fragment | NA    | 0     |
| 57_extracted_34013         | 3417  | No  | NA   | 0  | 1              | Not-determined  | Genome-fragment | NA    | 0     |
| 57_extracted_34024         | 1441  | No  | NA   | 0  | 0              | Not-determined  | Genome-fragment | NA    | 0     |
| 57_extracted_34060         | 1033  | No  | NA   | 0  | 1              | Not-determined  | Genome-fragment | NA    | 0     |
| 57_extracted_34064         | 3110  | No  | NA   | 0  | 2              | Not-determined  | Genome-fragment | NA    | 0     |
| 57_extracted_34084         | 1136  | No  | NA   | 0  | 1              | Not-determined  | Genome-fragment | NA    | 0     |
| 58_vs_k141_206416  full    | 2054  | No  | NA   | 0  | 1              | Low-quality     | Genome-fragment | 1.33  | 0     |
| 57_extracted_34262         | 1767  | No  | NA   | 0  | 1              | Not-determined  | Genome-fragment | NA    | 0     |
| 514_vs_k141_112635  full   | 2055  | No  | NA   | 0  | 2              | Low-quality     | Genome-fragment | 2.55  | 0     |
| 53_vs_k141_19642  full     | 2055  | No  | NA   | 0  | 0              | Low-quality     | Genome-fragment | 4.77  | 0     |
| 55_vs_k141_30476  full     | 2055  | No  | NA   | 1  | 0              | Low-quality     | Genome-fragment | 4.58  | 0     |
| 57_extracted_34821         | 2768  | No  | NA   | 0  | 0              | Not-determined  | Genome-fragment | NA    | 0     |
| 57_extracted_35102         | 1019  | No  | NA   | 0  | 1              | Not-determined  | Genome-fragment | NA    | 0     |
| 516_vs_7857  full          | 2055  | No  | NA   | 1  | 0              | Low-quality     | Genome-fragment | 4.16  | 0     |
| 57_extracted_35257         | 9748  | No  | NA   | 0  | 2              | Not-determined  | Genome-fragment | NA    | 0     |
| 57_extracted_35294         | 1643  |     |      |    |                |                 |                 |       |       |



|                          |       |    |    |    |   |                |                 |    |       |   |
|--------------------------|-------|----|----|----|---|----------------|-----------------|----|-------|---|
| 57_extracted_37741       | 1030  | No | NA | 0  | 2 | Not-determined | Genome-fragment | NA |       | 0 |
| 51_vs_k141_7691[full]    | 2057  | No | NA | 0  | 0 | Low-quality    | Genome-fragment | NA | 4.65  | 0 |
| 57_extracted_37962       | 2429  | No | NA | 0  | 1 | Not-determined | Genome-fragment | NA |       | 0 |
| 57_extracted_38012       | 1614  | No | NA | 0  | 3 | Not-determined | Genome-fragment | NA |       | 0 |
| 51_vs_k141_78458[full]   | 2057  | No | NA | 0  | 0 | Low-quality    | Genome-fragment | NA | 4.76  | 0 |
| 57_extracted_38253       | 1068  | No | NA | 0  | 0 | Not-determined | Genome-fragment | NA |       | 0 |
| 53_extracted_k141_87790  | 2057  | No | NA | 0  | 0 | Low-quality    | Genome-fragment | NA | 2.19  | 0 |
| 55_vs_k141_4635[full]    | 2057  | No | NA | 0  | 2 | Low-quality    | Genome-fragment | NA | 1.45  | 0 |
| 57_extracted_38494       | 1135  | No | NA | 0  | 1 | Not-determined | Genome-fragment | NA |       | 0 |
| 57_extracted_38546       | 4044  | No | NA | 0  | 1 | Not-determined | Genome-fragment | NA |       | 0 |
| 57_extracted_38554       | 1073  | No | NA | 0  | 1 | Not-determined | Genome-fragment | NA |       | 0 |
| 57_extracted_38697       | 60640 | No | NA | 33 | 1 | Complete       | High-quality    | NA | 100   | 0 |
| 516_vs_50059[full]       | 2057  | No | NA | 0  | 0 | Low-quality    | Genome-fragment | NA | 2.49  | 0 |
| 510_extracted_109594     | 2057  | No | NA | 2  | 0 | Low-quality    | Genome-fragment | NA | 1.47  | 0 |
| 57_extracted_39222       | 13069 | No | NA | 0  | 5 | Not-determined | Genome-fragment | NA |       | 0 |
| 57_extracted_39255       | 1356  | No | NA | 0  | 0 | Not-determined | Genome-fragment | NA |       | 0 |
| 57_extracted_39305       | 1025  | No | NA | 0  | 0 | Not-determined | Genome-fragment | NA |       | 0 |
| 57_extracted_39311       | 1089  | No | NA | 0  | 1 | Not-determined | Genome-fragment | NA |       | 0 |
| 57_extracted_39324       | 1232  | No | NA | 0  | 1 | Not-determined | Genome-fragment | NA |       | 0 |
| 57_extracted_39379       | 1343  | No | NA | 0  | 1 | Not-determined | Genome-fragment | NA |       | 0 |
| 57_extracted_39664       | 1131  | No | NA | 0  | 1 | Not-determined | Genome-fragment | NA |       | 0 |
| 57_extracted_39724       | 37389 | No | NA | 14 | 0 | High-quality   | High-quality    | NA | 100   | 0 |
| 57_extracted_39854       | 1473  | No | NA | 0  | 1 | Not-determined | Genome-fragment | NA |       | 0 |
| 57_extracted_39972       | 1095  | No | NA | 0  | 1 | Not-determined | Genome-fragment | NA |       | 0 |
| 517_vs_k141_92496[full]  | 2058  | No | NA | 2  | 0 | Low-quality    | Genome-fragment | NA | 3.2   | 0 |
| 57_extracted_40018       | 1611  | No | NA | 0  | 0 | Not-determined | Genome-fragment | NA |       | 0 |
| 57_extracted_40046       | 1287  | No | NA | 0  | 2 | Not-determined | Genome-fragment | NA |       | 0 |
| 57_extracted_40143       | 1086  | No | NA | 0  | 0 | Not-determined | Genome-fragment | NA |       | 0 |
| 57_extracted_40241       | 1776  | No | NA | 0  | 0 | Not-determined | Genome-fragment | NA |       | 0 |
| 51_vs_k141_146273[full]  | 2058  | No | NA | 0  | 0 | Low-quality    | Genome-fragment | NA | 4.45  | 0 |
| 57_vs_90681[full]        | 2058  | No | NA | 0  | 0 | Low-quality    | Genome-fragment | NA | 5.36  | 0 |
| 57_extracted_40432       | 5088  | No | NA | 0  | 2 | Not-determined | Genome-fragment | NA |       | 0 |
| 57_extracted_40433       | 5710  | No | NA | 0  | 3 | Not-determined | Genome-fragment | NA |       | 0 |
| 57_extracted_40441       | 1376  | No | NA | 0  | 1 | Not-determined | Genome-fragment | NA |       | 0 |
| 57_extracted_40480       | 1156  | No | NA | 0  | 1 | Not-determined | Genome-fragment | NA |       | 0 |
| 515_vs_58209[full]       | 2058  | No | NA | 0  | 0 | Low-quality    | Genome-fragment | NA | 3.61  | 0 |
| 57_extracted_40563       | 5704  | No | NA | 0  | 0 | Not-determined | Genome-fragment | NA |       | 0 |
| 57_extracted_40648       | 4048  | No | NA | 0  | 0 | Not-determined | Genome-fragment | NA |       | 0 |
| 57_extracted_40683       | 1255  | No | NA | 1  | 1 | Not-determined | Genome-fragment | NA |       | 0 |
| 55_extracted_k141_128988 | 2059  | No | NA | 2  | 0 | Low-quality    | Genome-fragment | NA | 5.6   | 0 |
| 57_extracted_40832       | 1346  | No | NA | 0  | 1 | Not-determined | Genome-fragment | NA |       | 0 |
| 57_extracted_40865       | 1136  | No | NA | 0  | 0 | Not-determined | Genome-fragment | NA |       | 0 |
| 512_vs_k141_131720[full] | 2059  | No | NA | 1  | 0 | Low-quality    | Genome-fragment | NA | 4.42  | 0 |
| 57_extracted_40912       | 1261  | No | NA | 0  | 1 | Not-determined | Genome-fragment | NA |       | 0 |
| 56_vs_k141_11589[full]   | 2059  | No | NA | 1  | 0 | Low-quality    | Genome-fragment | NA | 4.95  | 0 |
| 58_vs_k141_16160[full]   | 2059  | No | NA | 2  | 0 | Low-quality    | Genome-fragment | NA | 2.76  | 0 |
| 57_vs_63786[full]        | 2060  | No | NA | 0  | 1 | Low-quality    | Genome-fragment | NA | 3.79  | 0 |
| 57_extracted_41272       | 1452  | No | NA | 0  | 0 | Not-determined | Genome-fragment | NA |       | 0 |
| 57_extracted_41413       | 1304  | No | NA | 0  | 0 | Not-determined | Genome-fragment | NA |       | 0 |
| 57_extracted_41540       | 3460  | No | NA | 0  | 1 | Not-determined | Genome-fragment | NA |       | 0 |
| 57_extracted_41771       | 8400  | No | NA | 0  | 4 | Not-determined | Genome-fragment | NA |       | 0 |
| 57_extracted_41780       | 1156  | No | NA | 0  | 1 | Not-determined | Genome-fragment | NA |       | 0 |
| 57_extracted_41988       | 1017  | No | NA | 0  | 1 | Not-determined | Genome-fragment | NA |       | 0 |
| 57_extracted_42121       | 3201  | No | NA | 0  | 0 | Not-determined | Genome-fragment | NA |       | 0 |
| 57_vs_72743[full]        | 2060  | No | NA | 0  | 0 | Low-quality    | Genome-fragment | NA | 4.65  | 0 |
| 516_vs_52772[full]       | 2060  | No | NA | 0  | 0 | Low-quality    | Genome-fragment | NA | 4.17  | 0 |
| 57_extracted_42189       | 1035  | No | NA | 0  | 0 | Not-determined | Genome-fragment | NA |       | 0 |
| 57_extracted_42215       | 5199  | No | NA | 0  | 3 | Not-determined | Genome-fragment | NA |       | 0 |
| 57_extracted_42269       | 4139  | No | NA | 0  | 1 | Not-determined | Genome-fragment | NA |       | 0 |
| 57_extracted_42294       | 1532  | No | NA | 0  | 2 | Not-determined | Genome-fragment | NA |       | 0 |
| 57_extracted_42318       | 2175  | No | NA | 0  | 1 | Not-determined | Genome-fragment | NA |       | 0 |
| 57_extracted_42363       | 1785  | No | NA | 0  | 0 | Not-determined | Genome-fragment | NA |       | 0 |
| 57_extracted_42534       | 1309  | No | NA | 0  | 0 | Not-determined | Genome-fragment | NA |       | 0 |
| 512_vs_k141_54391[full]  | 2060  | No | NA | 0  | 1 | Low-quality    | Genome-fragment | NA | 1.83  | 0 |
| 57_extracted_42691       | 3612  | No | NA | 0  | 3 | Not-determined | Genome-fragment | NA |       | 0 |
| 57_extracted_42704       | 3717  | No | NA | 0  | 1 | Not-determined | Genome-fragment | NA |       | 0 |
| 57_extracted_42739       | 2481  | No | NA | 0  | 1 | Not-determined | Genome-fragment | NA |       | 0 |
| 57_extracted_42742       | 1097  | No | NA | 0  | 0 | Not-determined | Genome-fragment | NA |       | 0 |
| 57_extracted_42800       | 23850 | No | NA | 1  | 1 | Not-determined | Genome-fragment | NA |       | 0 |
| 56_vs_k141_20863[full]   | 2060  | No | NA | 2  | 0 | Low-quality    | Genome-fragment | NA | 2.86  | 0 |
| 514_vs_k141_53569[full]  | 2061  | No | NA | 3  | 0 | Low-quality    | Genome-fragment | NA | 4.54  | 0 |
| 57_extracted_124898      | 2061  | No | NA | 0  | 0 | Low-quality    | Genome-fragment | NA | 3.03  | 0 |
| 57_vs_132643[full]       | 2061  | No | NA | 0  | 2 | Low-quality    | Genome-fragment | NA | 1.28  | 0 |
| 57_extracted_43240       | 1311  | No | NA | 0  | 0 | Not-determined | Genome-fragment | NA |       | 0 |
| 57_extracted_43275       | 4207  | No | NA | 0  | 0 | Not-determined | Genome-fragment | NA |       | 0 |
| 57_extracted_43425       | 3267  | No | NA | 0  | 1 | Not-determined | Genome-fragment | NA |       | 0 |
| 57_extracted_43471       | 1375  | No | NA | 0  | 1 | Not-determined | Genome-fragment | NA |       | 0 |
| 57_extracted_43581       | 3525  | No | NA | 0  | 2 | Not-determined | Genome-fragment | NA |       | 0 |
| 57_extracted_43635       | 1354  | No | NA | 0  | 1 | Not-determined | Genome-fragment | NA |       | 0 |
| 57_extracted_43663       | 1108  | No | NA | 0  | 1 | Not-determined | Genome-fragment | NA |       | 0 |
| 57_extracted_43716       | 1374  | No | NA | 0  | 0 | Not-determined | Genome-fragment | NA |       | 0 |
| 57_extracted_43798       | 7581  | No | NA | 0  | 2 | Not-determined | Genome-fragment | NA |       | 0 |
| 516_extracted_111936     | 2061  | No | NA | 3  | 0 | Low-quality    | Genome-fragment | NA | 4.63  | 0 |
| 516_vs_133986[full]      | 2061  | No | NA | 2  | 0 | Low-quality    | Genome-fragment | NA | 3.6   | 0 |
| 57_extracted_43835       | 1322  | No | NA | 0  | 1 | Not-determined | Genome-fragment | NA |       | 0 |
| 516_vs_106825[full]      | 2061  | No | NA | 2  | 0 | Low-quality    | Genome-fragment | NA | 3.82  | 0 |
| 511_vs_k141_86209[full]  | 2062  | No | NA | 1  | 0 | Low-quality    | Genome-fragment | NA | 3.56  | 0 |
| 57_extracted_43942       | 1737  | No | NA | 0  | 0 | Not-determined | Genome-fragment | NA |       | 0 |
| 57_extracted_43983       | 1723  | No | NA | 0  | 2 | Not-determined | Genome-fragment | NA |       | 0 |
| 57_extracted_43984       | 3742  | No | NA | 0  | 2 | Not-determined | Genome-fragment | NA |       | 0 |
| 57_extracted_44131       | 2670  | No | NA | 0  | 1 | Not-determined | Genome-fragment | NA |       | 0 |
| 57_extracted_44344       | 2168  | No | NA | 0  | 1 | Not-determined | Genome-fragment | NA |       | 0 |
| 57_extracted_44391       | 1272  | No | NA | 0  | 1 | Not-determined | Genome-fragment | NA |       | 0 |
| 53_vs_k141_69893[full]   | 2062  | No | NA | 2  | 0 | Low-quality    | Genome-fragment | NA | 4.63  | 0 |
| 56_vs_k141_25395[full]   | 2062  | No | NA | 1  | 0 | Low-quality    | Genome-fragment | NA | 1.94  | 0 |
| 59_vs_k141_46328[full]   | 2063  | No | NA | 2  | 0 | Low-quality    | Genome-fragment | NA | 5.05  | 0 |
| 53_vs_k141_64919[full]   | 2063  | No | NA | 0  | 0 | Low-quality    | Genome-fragment | NA | 2.52  | 0 |
| 57_extracted_44625       | 1312  | No | NA | 0  | 1 | Not-determined | Genome-fragment | NA |       | 0 |
| 57_extracted_44634       | 1032  | No | NA | 0  | 1 | Not-determined | Genome-fragment | NA |       | 0 |
| 57_extracted_44968       | 2001  | No | NA | 0  | 4 | Not-determined | Genome-fragment | NA |       | 0 |
| 516_vs_41721[full]       | 2063  | No | NA | 4  | 0 | Low-quality    | Genome-fragment | NA | 3.17  | 0 |
| 57_extracted_45114       | 1553  | No | NA | 0  | 1 | Not-determined | Genome-fragment | NA |       | 0 |
| 57_extracted_45565       | 3312  | No | NA | 0  | 2 | Not-determined | Genome-fragment | NA |       | 0 |
| 512_extracted_k141_91070 | 2063  | No | NA | 0  | 0 | Low-quality    | Genome-fragment | NA | 4     | 0 |
| 512_vs_k141_29739[full]  | 2063  | No | NA | 0  | 0 | Low-quality    | Genome-fragment | NA | 5.11  | 0 |
| 57_extracted_45744       | 9902  | No | NA | 0  | 8 | Not-determined | Genome-fragment | NA |       | 0 |
| 57_extracted_46093       | 1101  | No | NA | 0  | 0 | Not-determined | Genome-fragment | NA |       | 0 |
| 57_extracted_46099       | 1460  | No | NA | 0  | 1 | Not-determined | Genome-fragment | NA |       | 0 |
| 56_vs_k141_13811[full]   | 2063  | No | NA | 0  | 2 | Low-quality    | Genome-fragment | NA | 0.72  | 0 |
| 58_vs_k141_3741[full]    | 2063  | No | NA | 1  | 0 | Low-quality    | Genome-fragment | NA | 1.28  | 0 |
| 57_extracted_46765       | 2042  | No | NA | 0  | 1 | Not-determined | Genome-fragment | NA |       | 0 |
| 57_extracted_46818       | 1021  | No | NA | 0  | 1 | Not-determined | Genome-fragment | NA |       | 0 |
| 57_extracted_46889       | 1442  | No | NA | 0  | 0 | Not-determined | Genome-fragment | NA |       | 0 |
| 57_extracted_47171       | 1589  | No | NA | 0  | 2 | Not-determined | Genome-fragment | NA |       | 0 |
| 57_extracted_47179       | 1097  | No | NA | 0  | 1 | Not-determined | Genome-fragment | NA |       | 0 |
| 517_vs_k141_24259[full]  | 2064  | No | NA | 0  | 1 | Low-quality    | Genome-fragment | NA | 3.36  | 0 |
| 514_vs_k141_78885[full]  | 2064  | No | NA | 1  | 0 | Low-quality    | Genome-fragment | NA | 46.7  | 0 |
| 57_extracted_47591       | 1524  | No | NA | 0  | 1 | Not-determined | Genome-fragment | NA |       | 0 |
| 57_extracted_47523       | 1369  | No | NA | 0  | 2 | Not-determined | Genome-fragment | NA |       | 0 |
| 57_extracted_47777       | 3020  | No | NA | 0  | 1 | Not-determined | Genome-fragment | NA |       | 0 |
| 516_extracted_74821      | 2064  | No | NA | 2  | 0 | Low-quality    | Genome-fragment | NA | 5.62  | 0 |
| 57_extracted_47908       | 3279  | No | NA | 0  | 0 | Not-determined | Genome-fragment | NA |       | 0 |
| 56_vs_k141_42475[full]   | 2064  | No | NA | 0  | 0 | Low-quality    | Genome-fragment | NA | 2.97  | 0 |
| 57_extracted_48099       | 2214  | No | NA | 0  | 2 | Not-determined | Genome-fragment | NA |       | 0 |
| 57_extracted_48117       | 1385  | No | NA | 0  | 1 | Not-determined | Genome-fragment | NA |       | 0 |
| 57_extracted_48304       | 2205  | No | NA | 0  | 1 | Not-determined | Genome-fragment | NA |       | 0 |
| 57_extracted_48547       | 3002  | No | NA | 0  | 0 | Not-determined | Genome-fragment | NA |       | 0 |
| 57_extracted_48574       | 1119  | No | NA | 0  | 0 | Not-determined | Genome-fragment | NA |       | 0 |
| 57_extracted_48593       | 1362  | No | NA | 0  | 1 | Not-determined | Genome-fragment | NA |       | 0 |
| 517_extracted_k141_72209 | 2065  | No | NA | 0  | 1 | Low-quality    | Genome-fragment | NA | 1.44  | 0 |
| 59_vs_k141_41136[full]   | 2065  | No | NA | 1  | 0 | Low-quality    | Genome-fragment | NA | 4.47  | 0 |
| 57_extracted_48808       | 512   | No | NA | 0  | 2 | Not-determined | Genome-fragment | NA |       | 0 |
| 57_extracted_48933       | 3255  | No | NA | 0  | 1 | Not-determined | Genome-fragment | NA |       | 0 |
| 511_extracted_k141_48484 | 2065  | No | NA | 0  | 0 | Low-quality    | Genome-fragment | NA | 3.21  | 0 |
| 57_extracted_49007       | 46929 | No | NA | 22 | 0 | Medium-quality | Genome-fragment | NA | 80.75 | 0 |
| 57_extracted_49107       | 1757  | No | NA | 0  | 0 | Not-determined | Genome-fragment | NA |       | 0 |
| 57_extracted_49164       | 1230  | No | NA | 0  | 1 | Not-determined | Genome-fragment | NA |       | 0 |
| 57_extracted_49239       | 1266  | No | NA | 0  | 0 | Not-determined | Genome-fragment | NA |       | 0 |
| 511_vs_k141_102134[full] | 2065  | No | NA | 0  | 0 | Low-quality    | Genome-fragment | NA | 4.29  | 0 |
| 57_extracted_49287       | 2577  | No | NA | 0  | 0 | Not-determined | Genome-fragment | NA |       | 0 |
| 57_vs_103612[full]       | 2065  | No | NA | 2  | 0 | Low-quality    | Genome-fragment | NA | 4.49  | 0 |
| 57_vs                    |       |    |    |    |   |                |                 |    |       |   |



|                          |       |    |    |    |   |                |                 |       |   |
|--------------------------|-------|----|----|----|---|----------------|-----------------|-------|---|
| 51_extracted_k141_34031  | 2066  | No | NA | 0  | 1 | Low-quality    | Genome-fragment | 0.77  | 0 |
| 514_vs_k141_113963  full | 2067  | No | NA | 0  | 0 | Low-quality    | Genome-fragment | 5.54  | 0 |
| 57_vs_k100315  full      | 2067  | No | NA | 1  | 0 | Low-quality    | Genome-fragment | 2.52  | 0 |
| 57_extracted_52225       | 1560  | No | NA | 0  | 1 | Not-determined | Genome-fragment | NA    | 0 |
| 57_extracted_52231       | 1626  | No | NA | 0  | 1 | Not-determined | Genome-fragment | NA    | 0 |
| 57_extracted_52451       | 1157  | No | NA | 0  | 0 | Not-determined | Genome-fragment | NA    | 0 |
| 516_vs_51439  full       | 2067  | No | NA | 0  | 0 | Low-quality    | Genome-fragment | 3.7   | 0 |
| 57_extracted_52628       | 1293  | No | NA | 0  | 1 | Not-determined | Genome-fragment | NA    | 0 |
| 57_extracted_52631       | 1840  | No | NA | 0  | 1 | Not-determined | Genome-fragment | NA    | 0 |
| 57_extracted_52640       | 2281  | No | NA | 0  | 0 | Not-determined | Genome-fragment | NA    | 0 |
| 57_extracted_52856       | 1626  | No | NA | 0  | 1 | Not-determined | Genome-fragment | NA    | 0 |
| 57_extracted_52893       | 1104  | No | NA | 0  | 2 | Not-determined | Genome-fragment | NA    | 0 |
| 57_extracted_52916       | 3725  | No | NA | 0  | 5 | Not-determined | Genome-fragment | NA    | 0 |
| 57_extracted_53025       | 1812  | No | NA | 0  | 0 | Not-determined | Genome-fragment | NA    | 0 |
| 56_extracted_k141_391    | 2067  | No | NA | 3  | 0 | Low-quality    | Genome-fragment | 6.79  | 0 |
| 57_vs_37410  full        | 2068  | No | NA | 0  | 1 | Low-quality    | Genome-fragment | 4.22  | 0 |
| 57_extracted_53050       | 1019  | No | NA | 0  | 1 | Not-determined | Genome-fragment | NA    | 0 |
| 516_extracted_74014      | 2068  | No | NA | 0  | 0 | Low-quality    | Genome-fragment | 2.28  | 0 |
| 57_extracted_53284       | 1312  | No | NA | 0  | 1 | Not-determined | Genome-fragment | NA    | 0 |
| 57_extracted_53390       | 3391  | No | NA | 0  | 2 | Not-determined | Genome-fragment | NA    | 0 |
| 516_vs_48805  full       | 2068  | No | NA | 0  | 0 | Low-quality    | Genome-fragment | 2.97  | 0 |
| 512_vs_k141_174375  full | 2068  | No | NA | 0  | 0 | Low-quality    | Genome-fragment | 2.6   | 0 |
| 57_extracted_53558       | 1261  | No | NA | 0  | 2 | Not-determined | Genome-fragment | NA    | 0 |
| 57_extracted_53694       | 1296  | No | NA | 0  | 2 | Not-determined | Genome-fragment | NA    | 0 |
| 57_extracted_53841       | 2118  | No | NA | 0  | 1 | Not-determined | Genome-fragment | NA    | 0 |
| 57_extracted_54011       | 1054  | No | NA | 0  | 2 | Not-determined | Genome-fragment | NA    | 0 |
| 57_extracted_54053       | 2043  | No | NA | 0  | 0 | Not-determined | Genome-fragment | NA    | 0 |
| 52_extracted_k141_13483  | 2068  | No | NA | 1  | 0 | Low-quality    | Genome-fragment | 4.92  | 0 |
| 58_extracted_k141_70859  | 2068  | No | NA | 0  | 1 | Low-quality    | Genome-fragment | 0.88  | 0 |
| 57_extracted_54572       | 2409  | No | NA | 0  | 1 | Not-determined | Genome-fragment | NA    | 0 |
| 511_vs_k141_10249  full  | 2069  | No | NA | 0  | 0 | Low-quality    | Genome-fragment | 3.26  | 0 |
| 57_extracted_54636       | 1079  | No | NA | 0  | 0 | Not-determined | Genome-fragment | NA    | 0 |
| 57_extracted_54718       | 2520  | No | NA | 0  | 0 | Not-determined | Genome-fragment | NA    | 0 |
| 57_extracted_54823       | 1221  | No | NA | 0  | 1 | Not-determined | Genome-fragment | NA    | 0 |
| 514_vs_k141_8877  full   | 2069  | No | NA | 2  | 0 | Low-quality    | Genome-fragment | 4.15  | 0 |
| 57_extracted_54911       | 1099  | No | NA | 0  | 0 | Not-determined | Genome-fragment | NA    | 0 |
| 57_extracted_54950       | 2979  | No | NA | 0  | 1 | Not-determined | Genome-fragment | NA    | 0 |
| 57_extracted_54989       | 1175  | No | NA | 0  | 2 | Not-determined | Genome-fragment | NA    | 0 |
| 516_vs_53811  full       | 2069  | No | NA | 0  | 0 | Low-quality    | Genome-fragment | 4.29  | 0 |
| 57_extracted_55112       | 3831  | No | NA | 0  | 2 | Not-determined | Genome-fragment | NA    | 0 |
| 512_vs_k141_45781  full  | 2069  | No | NA | 0  | 0 | Low-quality    | Genome-fragment | 4.93  | 0 |
| 57_extracted_55375       | 3869  | No | NA | 0  | 1 | Not-determined | Genome-fragment | NA    | 0 |
| 57_extracted_55643       | 2546  | No | NA | 0  | 1 | Not-determined | Genome-fragment | NA    | 0 |
| 59_vs_k141_12385  full   | 2070  | No | NA | 0  | 0 | Low-quality    | Genome-fragment | 3.93  | 0 |
| 514_vs_k141_24270  full  | 2070  | No | NA | 2  | 0 | Low-quality    | Genome-fragment | 4.78  | 0 |
| 51_vs_k141_11761  full   | 2070  | No | NA | 0  | 0 | Low-quality    | Genome-fragment | NA    | 0 |
| 55_vs_k141_108021  full  | 2070  | No | NA | 0  | 3 | Low-quality    | Genome-fragment | 1.64  | 0 |
| 57_vs_121907  full       | 2070  | No | NA | 1  | 0 | Low-quality    | Genome-fragment | 5.18  | 0 |
| 57_extracted_56489       | 1074  | No | NA | 0  | 0 | Not-determined | Genome-fragment | NA    | 0 |
| 57_extracted_56544       | 1869  | No | NA | 0  | 1 | Not-determined | Genome-fragment | NA    | 0 |
| 57_extracted_56664       | 3030  | No | NA | 0  | 1 | Not-determined | Genome-fragment | NA    | 0 |
| 57_extracted_56689       | 2090  | No | NA | 0  | 0 | Not-determined | Genome-fragment | NA    | 0 |
| 57_vs_34094  litgene     | 2070  | No | NA | 2  | 0 | Low-quality    | Genome-fragment | 5.19  | 0 |
| 511_vs_k141_78057  full  | 2071  | No | NA | 2  | 0 | Low-quality    | Genome-fragment | 3.32  | 0 |
| 57_extracted_56955       | 1521  | No | NA | 0  | 1 | Not-determined | Genome-fragment | NA    | 0 |
| 57_extracted_57009       | 3958  | No | NA | 0  | 1 | Not-determined | Genome-fragment | NA    | 0 |
| 57_extracted_57097       | 2476  | No | NA | 0  | 2 | Not-determined | Genome-fragment | NA    | 0 |
| 57_extracted_57115       | 1882  | No | NA | 0  | 1 | Not-determined | Genome-fragment | NA    | 0 |
| 51_vs_k141_15076  full   | 2071  | No | NA | 0  | 0 | Low-quality    | Genome-fragment | 5.58  | 0 |
| 57_extracted_57147       | 1643  | No | NA | 0  | 1 | Not-determined | Genome-fragment | NA    | 0 |
| 57_extracted_57149       | 1945  | No | NA | 0  | 0 | Not-determined | Genome-fragment | NA    | 0 |
| 53_vs_k141_73336  full   | 2071  | No | NA | 0  | 0 | Low-quality    | Genome-fragment | 3.33  | 0 |
| 57_extracted_57237       | 1129  | No | NA | 0  | 0 | Not-determined | Genome-fragment | NA    | 0 |
| 57_extracted_57619       | 1180  | No | NA | 0  | 1 | Not-determined | Genome-fragment | NA    | 0 |
| 57_vs_24529  full        | 2071  | No | NA | 0  | 0 | Low-quality    | Genome-fragment | 3.49  | 0 |
| 57_extracted_57764       | 1339  | No | NA | 0  | 0 | Not-determined | Genome-fragment | NA    | 0 |
| 57_extracted_57787       | 2692  | No | NA | 0  | 2 | Not-determined | Genome-fragment | NA    | 0 |
| 57_extracted_57831       | 7111  | No | NA | 0  | 2 | Not-determined | Genome-fragment | NA    | 0 |
| 58_extracted_k141_62705  | 2071  | No | NA | 0  | 0 | Low-quality    | Genome-fragment | 4.08  | 0 |
| 58_extracted_k141_41327  | 2071  | No | NA | 0  | 2 | Low-quality    | Genome-fragment | 0.99  | 0 |
| 59_extracted_k141_65843  | 2072  | No | NA | 1  | 0 | Low-quality    | Genome-fragment | 1.44  | 0 |
| 57_extracted_57952       | 3166  | No | NA | 0  | 0 | Not-determined | Genome-fragment | NA    | 0 |
| 57_extracted_58081       | 1680  | No | NA | 0  | 0 | Not-determined | Genome-fragment | NA    | 0 |
| 57_extracted_58097       | 1999  | No | NA | 0  | 1 | Not-determined | Genome-fragment | NA    | 0 |
| 57_extracted_58141       | 2096  | No | NA | 0  | 1 | Not-determined | Genome-fragment | NA    | 0 |
| 57_extracted_58321       | 5560  | No | NA | 0  | 0 | Not-determined | Genome-fragment | NA    | 0 |
| 51_vs_k141_84944  full   | 2072  | No | NA | 0  | 0 | Low-quality    | Genome-fragment | 0.99  | 0 |
| 57_extracted_58930       | 1231  | No | NA | 0  | 2 | Not-determined | Genome-fragment | NA    | 0 |
| 57_extracted_58997       | 3578  | No | NA | 0  | 1 | Not-determined | Genome-fragment | NA    | 0 |
| 57_extracted_59074       | 1198  | No | NA | 0  | 2 | Not-determined | Genome-fragment | NA    | 0 |
| 57_extracted_59097       | 3660  | No | NA | 0  | 1 | Not-determined | Genome-fragment | NA    | 0 |
| 57_extracted_59109       | 1326  | No | NA | 0  | 1 | Not-determined | Genome-fragment | NA    | 0 |
| 57_extracted_59131       | 2590  | No | NA | 0  | 0 | Not-determined | Genome-fragment | NA    | 0 |
| 57_extracted_59141       | 1005  | No | NA | 0  | 0 | Not-determined | Genome-fragment | NA    | 0 |
| 57_vs_5578  full         | 2072  | No | NA | 0  | 0 | Low-quality    | Genome-fragment | 4.48  | 0 |
| 510_vs_44498  full       | 2072  | No | NA | 0  | 2 | Low-quality    | Genome-fragment | 0.86  | 0 |
| 57_extracted_59549       | 3458  | No | NA | 0  | 1 | Not-determined | Genome-fragment | NA    | 0 |
| 57_extracted_59640       | 1360  | No | NA | 0  | 2 | Not-determined | Genome-fragment | NA    | 0 |
| 58_extracted_k141_120657 | 2072  | No | NA | 0  | 0 | Low-quality    | Genome-fragment | 2.2   | 0 |
| 59_vs_k141_25200  full   | 2073  | No | NA | 0  | 2 | Low-quality    | Genome-fragment | 1.35  | 0 |
| 57_extracted_60158       | 1251  | No | NA | 0  | 0 | Not-determined | Genome-fragment | NA    | 0 |
| 511_vs_k141_61179  full  | 2073  | No | NA | 0  | 0 | Low-quality    | Genome-fragment | 2.29  | 0 |
| 57_extracted_60412       | 1069  | No | NA | 0  | 1 | Not-determined | Genome-fragment | NA    | 0 |
| 57_extracted_60492       | 1363  | No | NA | 0  | 0 | Not-determined | Genome-fragment | NA    | 0 |
| 516_vs_170208  full      | 2073  | No | NA | 0  | 0 | Low-quality    | Genome-fragment | 2.32  | 0 |
| 57_extracted_60701       | 1070  | No | NA | 0  | 1 | Not-determined | Genome-fragment | NA    | 0 |
| 57_extracted_60968       | 41855 | No | NA | 22 | 1 | Complete       | High-quality    | 100   | 0 |
| 57_extracted_60997       | 4845  | No | NA | 0  | 4 | Not-determined | Genome-fragment | NA    | 0 |
| 57_extracted_61029       | 1307  | No | NA | 0  | 0 | Not-determined | Genome-fragment | NA    | 0 |
| 57_extracted_61057       | 4115  | No | NA | 0  | 3 | Not-determined | Genome-fragment | NA    | 0 |
| 57_extracted_61095       | 1111  | No | NA | 0  | 0 | Not-determined | Genome-fragment | NA    | 0 |
| 512_vs_k141_154508  full | 2073  | No | NA | 0  | 0 | Low-quality    | Genome-fragment | 3.71  | 0 |
| 57_extracted_61311       | 1208  | No | NA | 0  | 2 | Not-determined | Genome-fragment | NA    | 0 |
| 57_extracted_61416       | 2253  | No | NA | 0  | 1 | Not-determined | Genome-fragment | NA    | 0 |
| 512_vs_k141_7409  full   | 2073  | No | NA | 0  | 4 | Low-quality    | Genome-fragment | 3.03  | 0 |
| 57_extracted_61559       | 1501  | No | NA | 0  | 2 | Not-determined | Genome-fragment | NA    | 0 |
| 57_extracted_61596       | 2009  | No | NA | 0  | 0 | Not-determined | Genome-fragment | NA    | 0 |
| 57_extracted_61685       | 2235  | No | NA | 0  | 2 | Not-determined | Genome-fragment | NA    | 0 |
| 57_extracted_61722       | 1283  | No | NA | 0  | 0 | Not-determined | Genome-fragment | NA    | 0 |
| 57_extracted_61744       | 1224  | No | NA | 0  | 0 | Not-determined | Genome-fragment | NA    | 0 |
| 57_extracted_61803       | 3557  | No | NA | 0  | 0 | Not-determined | Genome-fragment | NA    | 0 |
| 57_extracted_61848       | 1444  | No | NA | 0  | 2 | Not-determined | Genome-fragment | NA    | 0 |
| 57_extracted_61922       | 1187  | No | NA | 0  | 1 | Not-determined | Genome-fragment | NA    | 0 |
| 57_extracted_61977       | 1358  | No | NA | 0  | 1 | Not-determined | Genome-fragment | NA    | 0 |
| 515_extracted_2598       | 2073  | No | NA | 0  | 0 | Low-quality    | Genome-fragment | 2.94  | 0 |
| 59_extracted_k141_11699  | 2074  | No | NA | 2  | 0 | Low-quality    | Genome-fragment | 4.57  | 0 |
| 59_vs_k141_84909  full   | 2074  | No | NA | 0  | 0 | Low-quality    | Genome-fragment | 2.41  | 0 |
| 57_extracted_62265       | 1477  | No | NA | 0  | 1 | Not-determined | Genome-fragment | NA    | 0 |
| 57_extracted_62393       | 1089  | No | NA | 0  | 0 | Not-determined | Genome-fragment | NA    | 0 |
| 57_extracted_62663       | 3059  | No | NA | 0  | 1 | Not-determined | Genome-fragment | NA    | 0 |
| 57_extracted_62800       | 3057  | No | NA | 0  | 2 | Not-determined | Genome-fragment | NA    | 0 |
| 57_extracted_62830       | 1734  | No | NA | 0  | 1 | Not-determined | Genome-fragment | NA    | 0 |
| 57_extracted_62847       | 1029  | No | NA | 0  | 1 | Not-determined | Genome-fragment | NA    | 0 |
| 57_extracted_62916       | 1440  | No | NA | 0  | 2 | Not-determined | Genome-fragment | NA    | 0 |
| 513_extracted_41848      | 2074  | No | NA | 0  | 1 | Low-quality    | Genome-fragment | 1.34  | 0 |
| 53_vs_k141_112274  full  | 2074  | No | NA | 2  | 0 | Low-quality    | Genome-fragment | 3.59  | 0 |
| 57_extracted_63109       | 11275 | No | NA | 0  | 7 | Not-determined | Genome-fragment | NA    | 0 |
| 57_vs_64391  full        | 2074  | No | NA | 0  | 0 | Low-quality    | Genome-fragment | 4.92  | 0 |
| 56_vs_k141_44882  full   | 2074  | No | NA | 0  | 0 | Low-quality    | Genome-fragment | 1.64  | 0 |
| 51_vs_k141_140782  full  | 2075  | No | NA | 1  | 0 | Low-quality    | Genome-fragment | 3.55  | 0 |
| 57_extracted_63513       | 1763  | No | NA | 0  | 1 | Not-determined | Genome-fragment | NA    | 0 |
| 57_extracted_63648       | 1051  | No | NA | 0  | 0 | Not-determined | Genome-fragment | NA    | 0 |
| 57_extracted_63690       | 1367  | No | NA | 0  | 0 | Not-determined | Genome-fragment | NA    | 0 |
| 57_extracted_63731       | 2114  | No | NA | 0  | 0 | Not-determined | Genome-fragment | NA    | 0 |
| 57_extracted_63805       | 1155  | No | NA | 0  | 1 | Not-determined | Genome-fragment | NA    | 0 |
| 57_extracted_63859       | 1422  | No | NA | 0  | 2 | Not-determined | Genome-fragment | NA    | 0 |
| 57_extracted_63883       | 2330  | No | NA | 0  | 3 | Not-determined | Genome-fragment | NA    | 0 |
| 57_extracted_63894       | 27117 | No | NA | 18 | 0 | High-quality   | High-quality    | 94.05 | 0 |
| 57_extracted_63953       | 1053  | No | NA | 0  | 0 | Not-determined | Genome-fragment | NA    | 0 |
| 57_extracted_64202       | 2107  | No | NA | 0  | 0 | Not-determined | Genome-fragment | NA    | 0 |
| 51_vs_k141_126290  full  | 2075  | No | NA | 0  | 0 | Low-quality    | Genome-fragment | 3.59  | 0 |
| 57_extracted_64320       | 1617  | No | NA | 0  | 1 | Not-determined | Genome-fragment | NA    | 0 |
| 57_extracted_64375       | 5613  | No | NA | 0  | 3 | Not-determined | Genome-fragment | NA    | 0 |
| 57_extracted_64486       | 1680  | No | NA | 0  | 1 | Not-determined | Genome-fragment | NA    | 0 |
| 57_extracted_64571       | 6023  | No | NA | 0  | 1 | Not-determined | Genome-fragment | NA    | 0 |
| 57_extracted_64609       | 3206  | No | NA | 0  | 2 | Not-determined | Genome-fragment | NA    | 0 |
| 516_vs_17474  full       | 2075  | No | NA | 0  | 0 | Low-quality    | Genome-fragment | 5.03  | 0 |
| 57_extracted_65058       | 1067  | No | NA | 0  | 1 | Not-determined | Genome-fragment | NA    | 0 |
| 515_vs_68169  full       | 2075  | No | NA | 0  | 0 | Low-quality    | Genome-fragment | 4.54  | 0 |
| 57                       |       |    |    |    |   |                |                 |       |   |



|                           |       |    |    |    |   |                |                 |       |   |
|---------------------------|-------|----|----|----|---|----------------|-----------------|-------|---|
| 514_extracted_k141_36863  | 2077  | No | NA | 6  | 0 | Low-quality    | Genome-fragment | 6.84  | 0 |
| 514_vs_k141_177131[full]  | 2077  | No | NA | 8  | 0 | Low-quality    | Genome-fragment | 4.57  | 0 |
| 57_extracted_67538        | 5151  | No | NA | 0  | 1 | Not-determined | Genome-fragment | NA    | 0 |
| 57_extracted_67552        | 1184  | No | NA | 0  | 1 | Not-determined | Genome-fragment | NA    | 0 |
| 514_vs_k141_33606[full]   | 2077  | No | NA | 0  | 0 | Low-quality    | Genome-fragment | 5.76  | 0 |
| 57_extracted_67576        | 1093  | No | NA | 0  | 0 | Not-determined | Genome-fragment | NA    | 0 |
| 57_extracted_67677        | 1165  | No | NA | 0  | 1 | Not-determined | Genome-fragment | NA    | 0 |
| 57_extracted_67702        | 1495  | No | NA | 0  | 0 | Not-determined | Genome-fragment | NA    | 0 |
| 57_vs_101259[full]        | 2077  | No | NA | 0  | 0 | Low-quality    | Genome-fragment | 4.6   | 0 |
| 57_extracted_67863        | 1131  | No | NA | 0  | 1 | Not-determined | Genome-fragment | NA    | 0 |
| 57_extracted_67910        | 33641 | No | NA | 16 | 0 | High-quality   | High-quality    | 100   | 0 |
| 57_extracted_67964        | 3127  | No | NA | 0  | 4 | Not-determined | Genome-fragment | NA    | 0 |
| 57_extracted_67968        | 1104  | No | NA | 0  | 1 | Not-determined | Genome-fragment | NA    | 0 |
| 57_extracted_68018        | 3626  | No | NA | 0  | 0 | Not-determined | Genome-fragment | NA    | 0 |
| 57_extracted_68238        | 1489  | No | NA | 0  | 1 | Not-determined | Genome-fragment | NA    | 0 |
| 57_extracted_68239        | 35810 | No | NA | 41 | 0 | High-quality   | High-quality    | 100   | 0 |
| 57_extracted_68256        | 1094  | No | NA | 0  | 1 | Not-determined | Genome-fragment | NA    | 0 |
| 58_vs_k141_20920[full]    | 2077  | No | NA | 0  | 1 | Low-quality    | Genome-fragment | 3.12  | 0 |
| 517_vs_k141_90454[full]   | 2078  | No | NA | 0  | 0 | Low-quality    | Genome-fragment | 3.87  | 0 |
| 55_vs_k141_127726[full]   | 2078  | No | NA | 0  | 0 | Low-quality    | Genome-fragment | 4.02  | 0 |
| 510_extracted_97568       | 2078  | No | NA | 0  | 0 | Low-quality    | Genome-fragment | 0.86  | 0 |
| 57_extracted_68507        | 2279  | No | NA | 0  | 0 | Not-determined | Genome-fragment | NA    | 0 |
| 57_extracted_68546        | 32399 | No | NA | 21 | 0 | Medium-quality | Genome-fragment | 65.12 | 0 |
| 57_extracted_68670        | 1307  | No | NA | 0  | 1 | Not-determined | Genome-fragment | NA    | 0 |
| 513_vs_39455[full]        | 2079  | No | NA | 0  | 0 | Low-quality    | Genome-fragment | 3.19  | 0 |
| 57_extracted_68806        | 6704  | No | NA | 0  | 2 | Not-determined | Genome-fragment | NA    | 0 |
| 57_extracted_68970        | 1028  | No | NA | 0  | 1 | Not-determined | Genome-fragment | NA    | 0 |
| 513_vs_132460[full]       | 2079  | No | NA | 0  | 2 | Low-quality    | Genome-fragment | 1.31  | 0 |
| 57_extracted_69348        | 15428 | No | NA | 0  | 0 | Medium-quality | Genome-fragment | 62.87 | 0 |
| 57_extracted_69404        | 1010  | No | NA | 0  | 2 | Not-determined | Genome-fragment | NA    | 0 |
| 57_extracted_69514        | 5611  | No | NA | 0  | 6 | Not-determined | Genome-fragment | NA    | 0 |
| 514_extracted_k141_8616   | 2079  | No | NA | 0  | 0 | Low-quality    | Genome-fragment | 6.85  | 0 |
| 51_vs_k141_135076[full]   | 2079  | No | NA | 1  | 0 | Low-quality    | Genome-fragment | 4.11  | 0 |
| 53_vs_k141_120452[full]   | 2079  | No | NA | 2  | 0 | Low-quality    | Genome-fragment | 3.62  | 0 |
| 57_extracted_69965        | 1351  | No | NA | 0  | 1 | Not-determined | Genome-fragment | NA    | 0 |
| 57_extracted_70123        | 1963  | No | NA | 0  | 2 | Not-determined | Genome-fragment | NA    | 0 |
| 57_extracted_70583        | 1617  | No | NA | 0  | 1 | Not-determined | Genome-fragment | NA    | 0 |
| 55_extracted_k141_139502  | 2079  | No | NA | 0  | 0 | Low-quality    | Genome-fragment | 4.34  | 0 |
| 57_extracted_70869        | 4149  | No | NA | 4  | 4 | Not-determined | Genome-fragment | NA    | 0 |
| 57_extracted_70893        | 1727  | No | NA | 0  | 1 | Not-determined | Genome-fragment | NA    | 0 |
| 57_extracted_70987        | 11883 | No | NA | 0  | 4 | Not-determined | Genome-fragment | NA    | 0 |
| 55_vs_k141_75017[ln2gene] | 2079  | No | NA | 0  | 1 | Low-quality    | Genome-fragment | 3.58  | 0 |
| 57_extracted_71195        | 1117  | No | NA | 0  | 1 | Not-determined | Genome-fragment | NA    | 0 |
| 57_extracted_71217        | 1129  | No | NA | 0  | 0 | Not-determined | Genome-fragment | NA    | 0 |
| 57_extracted_71268        | 1162  | No | NA | 0  | 0 | Not-determined | Genome-fragment | NA    | 0 |
| 57_extracted_71321        | 1156  | No | NA | 0  | 1 | Not-determined | Genome-fragment | NA    | 0 |
| 57_vs_17574[full]         | 2079  | No | NA | 3  | 0 | Low-quality    | Genome-fragment | 4.57  | 0 |
| 57_extracted_71527        | 12757 | No | NA | 1  | 2 | High-quality   | High-quality    | 100   | 0 |
| 57_extracted_71705        | 1408  | No | NA | 1  | 1 | Not-determined | Genome-fragment | NA    | 0 |
| 57_extracted_71766        | 1113  | No | NA | 0  | 1 | Not-determined | Genome-fragment | NA    | 0 |
| 512_vs_k141_142252[full]  | 2079  | No | NA | 1  | 0 | Low-quality    | Genome-fragment | 5.42  | 0 |
| 56_extracted_k141_171209  | 2079  | No | NA | 0  | 0 | Low-quality    | Genome-fragment | 0.99  | 0 |
| 57_extracted_72048        | 1437  | No | NA | 0  | 2 | Not-determined | Genome-fragment | NA    | 0 |
| 57_extracted_72166        | 1665  | No | NA | 0  | 1 | Not-determined | Genome-fragment | NA    | 0 |
| 57_extracted_72204        | 1034  | No | NA | 0  | 1 | Not-determined | Genome-fragment | NA    | 0 |
| 511_extracted_k141_27848  | 2080  | No | NA | 0  | 0 | Low-quality    | Genome-fragment | 3.02  | 0 |
| 57_extracted_72320        | 3284  | No | NA | 0  | 2 | Not-determined | Genome-fragment | NA    | 0 |
| 57_extracted_72446        | 1091  | No | NA | 0  | 0 | Not-determined | Genome-fragment | NA    | 0 |
| 57_extracted_72493        | 22981 | No | NA | 0  | 0 | Medium-quality | Genome-fragment | 54.26 | 0 |
| 57_extracted_72682        | 1392  | No | NA | 0  | 1 | Not-determined | Genome-fragment | NA    | 0 |
| 51_extracted_k141_61606   | 2080  | No | NA | 0  | 0 | Low-quality    | Genome-fragment | 2.05  | 0 |
| 51_vs_k141_84410[full]    | 2080  | No | NA | 0  | 3 | Low-quality    | Genome-fragment | 1.02  | 0 |
| 57_extracted_72777        | 1151  | No | NA | 0  | 1 | Not-determined | Genome-fragment | NA    | 0 |
| 57_extracted_72922        | 2963  | No | NA | 0  | 5 | Not-determined | Genome-fragment | NA    | 0 |
| 57_extracted_73108        | 1685  | No | NA | 0  | 0 | Not-determined | Genome-fragment | NA    | 0 |
| 57_extracted_73156        | 4433  | No | NA | 0  | 1 | Not-determined | Genome-fragment | NA    | 0 |
| 55_extracted_k141_13338   | 2080  | No | NA | 0  | 0 | Low-quality    | Genome-fragment | 4.13  | 0 |
| 55_vs_k141_101398[full]   | 2080  | No | NA | 0  | 0 | Low-quality    | Genome-fragment | 4.01  | 0 |
| 57_extracted_73327        | 1007  | No | NA | 0  | 2 | Not-determined | Genome-fragment | NA    | 0 |
| 57_extracted_73559        | 9703  | No | NA | 0  | 1 | Not-determined | Genome-fragment | NA    | 0 |
| 57_extracted_73591        | 1017  | No | NA | 0  | 1 | Not-determined | Genome-fragment | NA    | 0 |
| 57_extracted_73782        | 1068  | No | NA | 0  | 1 | Not-determined | Genome-fragment | NA    | 0 |
| 516_vs_12254[full]        | 2080  | No | NA | 2  | 0 | Low-quality    | Genome-fragment | 5.16  | 0 |
| 57_extracted_73893        | 3359  | No | NA | 0  | 0 | Not-determined | Genome-fragment | NA    | 0 |
| 516_vs_143722[full]       | 2080  | No | NA | 1  | 0 | Low-quality    | Genome-fragment | 3.26  | 0 |
| 513_vs_147838[full]       | 2081  | No | NA | 0  | 0 | Low-quality    | Genome-fragment | 1.45  | 0 |
| 57_extracted_74440        | 1141  | No | NA | 0  | 0 | Not-determined | Genome-fragment | NA    | 0 |
| 514_extracted_k141_46698  | 2081  | No | NA | 0  | 1 | Low-quality    | Genome-fragment | 2.2   | 0 |
| 57_extracted_74507        | 1122  | No | NA | 0  | 0 | Not-determined | Genome-fragment | NA    | 0 |
| 57_extracted_74605        | 1030  | No | NA | 0  | 1 | Not-determined | Genome-fragment | NA    | 0 |
| 57_extracted_74669        | 1086  | No | NA | 0  | 1 | Not-determined | Genome-fragment | NA    | 0 |
| 53_extracted_k141_53839   | 2081  | No | NA | 0  | 0 | Low-quality    | Genome-fragment | 1.44  | 0 |
| 57_extracted_74800        | 1435  | No | NA | 0  | 1 | Not-determined | Genome-fragment | NA    | 0 |
| 55_vs_k141_79398[full]    | 2081  | No | NA | 0  | 2 | Low-quality    | Genome-fragment | 2.65  | 0 |
| 57_extracted_75040        | 7462  | No | NA | 0  | 1 | Not-determined | Genome-fragment | NA    | 0 |
| 57_extracted_75111        | 1735  | No | NA | 0  | 1 | Not-determined | Genome-fragment | NA    | 0 |
| 57_extracted_75137        | 3326  | No | NA | 0  | 2 | Not-determined | Genome-fragment | NA    | 0 |
| 57_extracted_75298        | 1018  | No | NA | 0  | 1 | Not-determined | Genome-fragment | NA    | 0 |
| 58_vs_k141_15281[full]    | 2081  | No | NA | 0  | 1 | Low-quality    | Genome-fragment | 2.64  | 0 |
| 57_extracted_75538        | 1682  | No | NA | 0  | 0 | Not-determined | Genome-fragment | NA    | 0 |
| 55_extracted_k141_53781   | 2082  | No | NA | 0  | 0 | Low-quality    | Genome-fragment | 3.43  | 0 |
| 57_extracted_75600        | 1741  | No | NA | 0  | 1 | Not-determined | Genome-fragment | NA    | 0 |
| 57_extracted_75701        | 1081  | No | NA | 0  | 1 | Not-determined | Genome-fragment | NA    | 0 |
| 57_extracted_75744        | 1380  | No | NA | 0  | 1 | Not-determined | Genome-fragment | NA    | 0 |
| 516_vs_127718[full]       | 2082  | No | NA | 0  | 0 | Low-quality    | Genome-fragment | 5.73  | 0 |
| 57_extracted_75899        | 2420  | No | NA | 0  | 2 | Not-determined | Genome-fragment | NA    | 0 |
| 512_vs_k141_67732[full]   | 2082  | No | NA | 0  | 0 | Low-quality    | Genome-fragment | 2.26  | 0 |
| 57_extracted_75974        | 8041  | No | NA | 0  | 6 | Not-determined | Genome-fragment | NA    | 0 |
| 512_vs_k141_1618129[full] | 2082  | No | NA | 0  | 0 | Low-quality    | Genome-fragment | 4.71  | 0 |
| 59_extracted_k141_131908  | 2083  | No | NA | 1  | 0 | Low-quality    | Genome-fragment | 1.2   | 0 |
| 57_extracted_76101        | 3163  | No | NA | 0  | 3 | Not-determined | Genome-fragment | NA    | 0 |
| 59_extracted_k141_50693   | 2083  | No | NA | 0  | 0 | Low-quality    | Genome-fragment | 4.88  | 0 |
| 57_extracted_76279        | 2573  | No | NA | 0  | 1 | Not-determined | Genome-fragment | NA    | 0 |
| 57_extracted_76327        | 3465  | No | NA | 0  | 0 | Not-determined | Genome-fragment | NA    | 0 |
| 57_extracted_76365        | 1464  | No | NA | 0  | 0 | Not-determined | Genome-fragment | NA    | 0 |
| 57_extracted_76382        | 17054 | No | NA | 8  | 0 | Medium-quality | Genome-fragment | 78.25 | 0 |
| 57_extracted_76463        | 46228 | No | NA | 14 | 0 | High-quality   | High-quality    | 100   | 0 |
| 51_vs_k141_12071[full]    | 2083  | No | NA | 2  | 0 | Low-quality    | Genome-fragment | 5.3   | 0 |
| 57_extracted_76517        | 1918  | No | NA | 0  | 1 | Not-determined | Genome-fragment | NA    | 0 |
| 57_extracted_76586        | 3686  | No | NA | 0  | 0 | Not-determined | Genome-fragment | NA    | 0 |
| 510_extracted_94395       | 2083  | No | NA | 1  | 0 | Low-quality    | Genome-fragment | 1.45  | 0 |
| 510_vs_118957[full]       | 2083  | No | NA | 0  | 3 | Low-quality    | Genome-fragment | 1.2   | 0 |
| 57_extracted_76881        | 4586  | No | NA | 0  | 3 | Not-determined | Genome-fragment | NA    | 0 |
| 57_extracted_77061        | 1083  | No | NA | 0  | 1 | Not-determined | Genome-fragment | NA    | 0 |
| 58_vs_k141_1740609[full]  | 2083  | No | NA | 0  | 0 | Low-quality    | Genome-fragment | 4.61  | 0 |
| 57_extracted_77243        | 1138  | No | NA | 0  | 1 | Not-determined | Genome-fragment | NA    | 0 |
| 57_extracted_77363        | 4229  | No | NA | 0  | 2 | Not-determined | Genome-fragment | NA    | 0 |
| 511_vs_k141_42973[full]   | 2084  | No | NA | 0  | 0 | Low-quality    | Genome-fragment | 5     | 0 |
| 57_extracted_77436        | 1188  | No | NA | 0  | 0 | Not-determined | Genome-fragment | NA    | 0 |
| 57_extracted_77704        | 2439  | No | NA | 0  | 2 | Not-determined | Genome-fragment | NA    | 0 |
| 57_extracted_77719        | 1336  | No | NA | 0  | 1 | Not-determined | Genome-fragment | NA    | 0 |
| 514_extracted_k141_20086  | 2084  | No | NA | 0  | 0 | Low-quality    | Genome-fragment | 6.87  | 0 |
| 57_extracted_77864        | 1600  | No | NA | 0  | 1 | Not-determined | Genome-fragment | NA    | 0 |
| 57_extracted_78089        | 2366  | No | NA | 0  | 2 | Not-determined | Genome-fragment | NA    | 0 |
| 57_extracted_78149        | 4235  | No | NA | 0  | 3 | Not-determined | Genome-fragment | NA    | 0 |
| 57_extracted_78327        | 3815  | No | NA | 0  | 2 | Not-determined | Genome-fragment | NA    | 0 |
| 57_extracted_78501        | 2841  | No | NA | 0  | 1 | Not-determined | Genome-fragment | NA    | 0 |
| 53_vs_k141_86021[full]    | 2084  | No | NA | 0  | 0 | Low-quality    | Genome-fragment | 4.22  | 0 |
| 57_extracted_78649        | 1524  | No | NA | 0  | 1 | Not-determined | Genome-fragment | NA    | 0 |
| 57_extracted_78656        | 3098  | No | NA | 0  | 2 | Not-determined | Genome-fragment | NA    | 0 |
| 57_extracted_78963        | 1119  | No | NA | 0  | 1 | Not-determined | Genome-fragment | NA    | 0 |
| 57_extracted_79100        | 1726  | No | NA | 0  | 1 | Not-determined | Genome-fragment | NA    | 0 |
| 57_extracted_79165        | 1331  | No | NA | 0  | 0 | Not-determined | Genome-fragment | NA    | 0 |
| 53_vs_k141_92941[full]    | 2084  | No | NA | 0  | 0 | Low-quality    | Genome-fragment | 5.71  | 0 |
| 57_extracted_79385        | 1643  | No | NA | 0  | 1 | Not-determined | Genome-fragment | NA    | 0 |
| 55_vs_k141_35827[full]    | 2084  | No | NA | 0  | 0 | Low-quality    | Genome-fragment | 4.26  | 0 |
| 512_extracted_k141_70517  | 2084  | No | NA | 0  | 1 | Low-quality    | Genome-fragment | 2.09  | 0 |
| 57_extracted_79753        | 1132  | No | NA | 0  | 1 | Not-determined | Genome-fragment | NA    | 0 |
| 57_extracted_79813        | 2053  | No | NA | 0  | 1 | Not-determined | Genome-fragment | NA    | 0 |
| 57_extracted_79830        | 9902  | No | NA | 0  | 1 | Not-determined | Genome-fragment | NA    | 0 |
| 56_vs_k141_13951[full]    | 2084  | No | NA | 0  | 1 | Low-quality    | Genome-fragment | 4.08  | 0 |
| 57_extracted_80149        | 1215  | No | NA | 0  | 1 | Not-determined | Genome-fragment | NA    | 0 |
| 57_extracted_80186        | 1086  | No | NA | 0  | 0 | Not-determined | Genome-fragment | NA    | 0 |
| 58_vs_k141_175395[full]   | 2084  | No | NA | 2  | 0 | Low-quality    | Genome-fragment | 3.57  | 0 |
| 57_extracted_80326        | 1813  | No | NA | 0  | 0 | Not-determined | Genome-fragment | NA    | 0 |
| 57_extracted_80365        | 1253  | No | NA | 0  | 0 | Not-determined | Genome-fragment | NA    | 0 |
| 57_extracted_80391        | 1938  | No | NA | 0  | 1 | Not-determined | Genome-fragment | NA    | 0 |
| 517_vs_k141_158851[full]  | 2085  | No | NA | 0  | 0 | Low-quality    | Genome-fragment | 2.81  | 0 |
| 57_extracted_80598        | 1294  |    |    |    |   |                |                 |       |   |



|                             |       |     |    |    |    |                |                 |       |      |
|-----------------------------|-------|-----|----|----|----|----------------|-----------------|-------|------|
| 51_extracted_k141_117310    | 2086  | No  | NA | 0  | 1  | Low-quality    | Genome-fragment | 0.18  | 0    |
| 57_extracted_82810          | 3206  | No  | NA | 0  | 3  | Not-determined | Genome-fragment | NA    | 0    |
| 57_extracted_82899          | 4306  | No  | NA | 0  | 2  | Not-determined | Genome-fragment | NA    | 0    |
| 57_extracted_83046          | 3106  | No  | NA | 0  | 4  | Not-determined | Genome-fragment | NA    | 0    |
| 512_vs_k141_114142  full    | 2086  | No  | NA | 2  | 0  | Low-quality    | Genome-fragment | 4.82  | 0    |
| 57_extracted_83329          | 1412  | No  | NA | 0  | 0  | Not-determined | Genome-fragment | NA    | 0    |
| 57_extracted_83380          | 1503  | No  | NA | 0  | 2  | Not-determined | Genome-fragment | NA    | 0    |
| 57_extracted_83478          | 3367  | No  | NA | 0  | 2  | Not-determined | Genome-fragment | NA    | 0    |
| 57_extracted_83490          | 17786 | No  | NA | 0  | 3  | Not-determined | Genome-fragment | NA    | 0    |
| 57_extracted_83624          | 16244 | No  | NA | 7  | 0  | Medium-quality | Genome-fragment | 77.28 | 0    |
| 511_vs_k141_10401  full     | 2087  | No  | NA | 3  | 0  | Low-quality    | Genome-fragment | 3.39  | 0    |
| 57_extracted_83654          | 1066  | No  | NA | 0  | 1  | Not-determined | Genome-fragment | NA    | 0    |
| 57_extracted_83739          | 1287  | No  | NA | 0  | 1  | Not-determined | Genome-fragment | NA    | 0    |
| 53_vs_k141_68587  full      | 2087  | No  | NA | 1  | 0  | Low-quality    | Genome-fragment | 4.95  | 0    |
| 57_extracted_83852          | 3398  | No  | NA | 0  | 2  | Not-determined | Genome-fragment | NA    | 0    |
| 57_extracted_83858          | 1012  | No  | NA | 0  | 2  | Not-determined | Genome-fragment | NA    | 0    |
| 57_extracted_83875          | 3696  | No  | NA | 0  | 3  | Not-determined | Genome-fragment | NA    | 0    |
| 57_extracted_83927          | 2359  | No  | NA | 0  | 2  | Not-determined | Genome-fragment | NA    | 0    |
| 57_extracted_83990          | 6118  | No  | NA | 0  | 1  | Not-determined | Genome-fragment | NA    | 0    |
| 58_vs_k141_71936  full      | 2087  | No  | NA | 2  | 0  | Low-quality    | Genome-fragment | 4.63  | 0    |
| 57_extracted_84314          | 2193  | No  | NA | 0  | 1  | Not-determined | Genome-fragment | NA    | 0    |
| 517_extracted_k141_177157   | 2088  | No  | NA | 0  | 0  | Low-quality    | Genome-fragment | 2.47  | 0    |
| 57_extracted_84360          | 1051  | No  | NA | 0  | 0  | Not-determined | Genome-fragment | NA    | 0    |
| 57_extracted_84432          | 1014  | No  | NA | 0  | 0  | Not-determined | Genome-fragment | NA    | 0    |
| 57_extracted_84557          | 1118  | No  | NA | 0  | 0  | Not-determined | Genome-fragment | NA    | 0    |
| 57_extracted_84689          | 1019  | No  | NA | 0  | 0  | Not-determined | Genome-fragment | NA    | 0    |
| 57_extracted_84792          | 2036  | No  | NA | 0  | 1  | Not-determined | Genome-fragment | NA    | 0    |
| 57_extracted_84801          | 3646  | No  | NA | 0  | 7  | Not-determined | Genome-fragment | NA    | 0    |
| 57_extracted_84953          | 7951  | No  | NA | 6  | 0  | Not-determined | Genome-fragment | NA    | 0    |
| 57_extracted_84974          | 80171 | No  | NA | 22 | 1  | Medium-quality | Genome-fragment | 55.23 | 0    |
| 57_extracted_85031          | 4719  | No  | NA | 0  | 4  | Not-determined | Genome-fragment | NA    | 0    |
| 517_vs_k141_142349  full    | 2088  | No  | NA | 0  | 0  | Low-quality    | Genome-fragment | 5.72  | 0    |
| 57_extracted_85118          | 1341  | No  | NA | 0  | 0  | Not-determined | Genome-fragment | NA    | 0    |
| 57_extracted_85199          | 1842  | No  | NA | 0  | 0  | Not-determined | Genome-fragment | NA    | 0    |
| 57_extracted_85229          | 8111  | No  | NA | 0  | 2  | Not-determined | Genome-fragment | NA    | 0    |
| 57_extracted_85472          | 1053  | No  | NA | 0  | 2  | Not-determined | Genome-fragment | NA    | 0    |
| 57_extracted_85678          | 10562 | No  | NA | 0  | 4  | Not-determined | Genome-fragment | NA    | 0    |
| 57_extracted_85860          | 1660  | No  | NA | 0  | 0  | Not-determined | Genome-fragment | NA    | 0    |
| 57_extracted_86229          | 1410  | No  | NA | 0  | 0  | Not-determined | Genome-fragment | NA    | 0    |
| 57_extracted_86339          | 1140  | No  | NA | 0  | 0  | Not-determined | Genome-fragment | NA    | 0    |
| 59_vs_k141_32213  full      | 2088  | No  | NA | 0  | 1  | Low-quality    | Genome-fragment | 2.49  | 0    |
| 57_extracted_86423          | 1172  | No  | NA | 0  | 1  | Not-determined | Genome-fragment | NA    | 0    |
| 57_extracted_86448          | 3693  | No  | NA | 0  | 3  | Not-determined | Genome-fragment | NA    | 0    |
| 55_vs_k141_139521  full     | 2088  | No  | NA | 0  | 0  | Low-quality    | Genome-fragment | 3.87  | 0    |
| 57_vs_44806  full           | 2088  | Yes | NA | 1  | 1  | Low-quality    | Genome-fragment | 1.86  | 55.6 |
| 57_extracted_86605          | 1954  | No  | NA | 1  | 3  | Not-determined | Genome-fragment | NA    | 0    |
| 57_vs_94856  full           | 2088  | No  | NA | 1  | 0  | Low-quality    | Genome-fragment | 2.03  | 0    |
| 57_extracted_86762          | 1661  | No  | NA | 0  | 0  | Not-determined | Genome-fragment | NA    | 0    |
| 57_extracted_86803          | 1126  | No  | NA | 0  | 0  | Not-determined | Genome-fragment | NA    | 0    |
| 57_extracted_86977          | 2476  | No  | NA | 0  | 1  | Not-determined | Genome-fragment | NA    | 0    |
| 59_vs_k141_48044  full      | 2089  | No  | NA | 2  | 0  | Low-quality    | Genome-fragment | 3.78  | 0    |
| 57_extracted_87085          | 1381  | No  | NA | 0  | 2  | Not-determined | Genome-fragment | NA    | 0    |
| 57_extracted_87250          | 3540  | No  | NA | 0  | 2  | Not-determined | Genome-fragment | NA    | 0    |
| 511_vs_k141_93100  full     | 2089  | No  | NA | 1  | 0  | Low-quality    | Genome-fragment | 3.95  | 0    |
| 57_extracted_87276          | 4856  | No  | NA | 0  | 0  | Not-determined | Genome-fragment | NA    | 0    |
| 57_extracted_87338          | 1450  | No  | NA | 0  | 1  | Not-determined | Genome-fragment | NA    | 0    |
| 513_vs_99104  full          | 2089  | No  | NA | 1  | 0  | Low-quality    | Genome-fragment | 4.19  | 0    |
| 57_extracted_87493          | 3845  | No  | NA | 0  | 2  | Not-determined | Genome-fragment | NA    | 0    |
| 57_extracted_87637          | 3017  | No  | NA | 0  | 2  | Not-determined | Genome-fragment | NA    | 0    |
| 57_extracted_87821          | 1183  | No  | NA | 0  | 1  | Not-determined | Genome-fragment | NA    | 0    |
| 57_vs_29598  full           | 2089  | No  | NA | 0  | 0  | Low-quality    | Genome-fragment | 4.89  | 0    |
| 57_extracted_88256          | 1248  | No  | NA | 0  | 1  | Not-determined | Genome-fragment | NA    | 0    |
| 512_vs_k141_82809  full     | 2089  | No  | NA | 0  | 1  | Low-quality    | Genome-fragment | 6.52  | 0    |
| 57_extracted_88530          | 2137  | No  | NA | 0  | 1  | Not-determined | Genome-fragment | NA    | 0    |
| 57_extracted_88664          | 1133  | No  | NA | 0  | 2  | Not-determined | Genome-fragment | NA    | 0    |
| 57_extracted_88691          | 1089  | No  | NA | 0  | 2  | Not-determined | Genome-fragment | NA    | 0    |
| 57_extracted_88795          | 1082  | No  | NA | 0  | 0  | Not-determined | Genome-fragment | NA    | 0    |
| 57_extracted_88846          | 24184 | No  | NA | 0  | 13 | Not-determined | Genome-fragment | NA    | 0    |
| 56_vs_k141_46811  full      | 2089  | No  | NA | 0  | 0  | Low-quality    | Genome-fragment | 2.52  | 0    |
| 57_extracted_89143          | 2968  | No  | NA | 0  | 2  | Not-determined | Genome-fragment | NA    | 0    |
| 57_extracted_89197          | 16972 | No  | NA | 19 | 0  | Medium-quality | Genome-fragment | 77.43 | 0    |
| 511_vs_k141_28250  full     | 2090  | No  | NA | 0  | 0  | Low-quality    | Genome-fragment | 3.18  | 0    |
| 57_extracted_89344          | 1426  | No  | NA | 0  | 1  | Not-determined | Genome-fragment | NA    | 0    |
| 57_extracted_89387          | 3232  | No  | NA | 0  | 2  | Not-determined | Genome-fragment | NA    | 0    |
| 57_extracted_89413          | 3363  | No  | NA | 0  | 3  | Not-determined | Genome-fragment | NA    | 0    |
| 57_extracted_89420          | 2101  | No  | NA | 0  | 0  | Not-determined | Genome-fragment | NA    | 0    |
| 57_extracted_89431          | 1398  | No  | NA | 0  | 1  | Not-determined | Genome-fragment | NA    | 0    |
| 55_extracted_k141_129981    | 2090  | No  | NA | 2  | 0  | Low-quality    | Genome-fragment | 6.11  | 0    |
| 57_extracted_89546          | 3983  | No  | NA | 0  | 0  | Not-determined | Genome-fragment | NA    | 0    |
| 57_extracted_89603          | 1559  | No  | NA | 0  | 2  | Not-determined | Genome-fragment | NA    | 0    |
| 57_extracted_89633          | 3263  | No  | NA | 0  | 3  | Not-determined | Genome-fragment | NA    | 0    |
| 57_extracted_89668          | 16930 | No  | NA | 0  | 0  | Medium-quality | Genome-fragment | 72.64 | 0    |
| 57_extracted_89680          | 5114  | No  | NA | 0  | 1  | Not-determined | Genome-fragment | NA    | 0    |
| 57_extracted_89750          | 1711  | No  | NA | 0  | 2  | Not-determined | Genome-fragment | NA    | 0    |
| 57_extracted_89835          | 1107  | No  | NA | 0  | 1  | Not-determined | Genome-fragment | NA    | 0    |
| 57_extracted_90206          | 3936  | No  | NA | 0  | 1  | Not-determined | Genome-fragment | NA    | 0    |
| 57_extracted_90252          | 1094  | No  | NA | 0  | 2  | Not-determined | Genome-fragment | NA    | 0    |
| 55_vs_k141_2397  full       | 2090  | No  | NA | 0  | 0  | Low-quality    | Genome-fragment | 4.3   | 0    |
| 57_extracted_90294          | 4658  | No  | NA | 0  | 1  | Not-determined | Genome-fragment | NA    | 0    |
| 57_extracted_90308          | 2307  | No  | NA | 0  | 1  | Not-determined | Genome-fragment | NA    | 0    |
| 57_extracted_90341          | 8216  | No  | NA | 0  | 0  | Not-determined | Genome-fragment | NA    | 0    |
| 57_extracted_90356          | 1719  | No  | NA | 0  | 0  | Not-determined | Genome-fragment | NA    | 0    |
| 57_extracted_90612          | 1113  | No  | NA | 0  | 1  | Not-determined | Genome-fragment | NA    | 0    |
| 57_extracted_90748          | 1191  | No  | NA | 0  | 0  | Not-determined | Genome-fragment | NA    | 0    |
| 57_extracted_90970          | 2282  | No  | NA | 0  | 0  | Not-determined | Genome-fragment | NA    | 0    |
| 57_extracted_90989          | 1192  | No  | NA | 0  | 1  | Not-determined | Genome-fragment | NA    | 0    |
| 57_vs_37811  full           | 2090  | No  | NA | 0  | 0  | Low-quality    | Genome-fragment | 5.2   | 0    |
| 516_vs_17849  full          | 2090  | No  | NA | 1  | 0  | Low-quality    | Genome-fragment | 4.04  | 0    |
| 57_extracted_91408          | 1192  | No  | NA | 0  | 1  | Not-determined | Genome-fragment | NA    | 0    |
| 57_extracted_91521          | 1317  | No  | NA | 0  | 2  | Not-determined | Genome-fragment | NA    | 0    |
| 510_vs_91839  full          | 2090  | No  | NA | 1  | 0  | Low-quality    | Genome-fragment | 7.08  | 0    |
| 57_extracted_91546          | 3898  | No  | NA | 0  | 2  | Not-determined | Genome-fragment | NA    | 0    |
| 54_extracted_14369          | 2090  | No  | NA | 2  | 0  | Low-quality    | Genome-fragment | 4.77  | 0    |
| 57_extracted_91815          | 3644  | No  | NA | 0  | 1  | Not-determined | Genome-fragment | NA    | 0    |
| 56_vs_k141_12162  full      | 2090  | No  | NA | 0  | 0  | Low-quality    | Genome-fragment | 2.35  | 0    |
| 517_vs_k141_33828  full     | 2091  | No  | NA | 1  | 0  | Low-quality    | Genome-fragment | 1.28  | 0    |
| 51_vs_k141_116503  full     | 2091  | No  | NA | 0  | 1  | Low-quality    | Genome-fragment | 1.31  | 0    |
| 57_extracted_92156          | 1076  | No  | NA | 0  | 1  | Not-determined | Genome-fragment | NA    | 0    |
| 57_vs_29521  full           | 2091  | No  | NA | 0  | 0  | Low-quality    | Genome-fragment | 4.23  | 0    |
| 57_extracted_92275          | 1288  | No  | NA | 0  | 1  | Not-determined | Genome-fragment | NA    | 0    |
| 57_extracted_92310          | 1192  | No  | NA | 0  | 0  | Not-determined | Genome-fragment | NA    | 0    |
| 57_extracted_92327          | 1468  | No  | NA | 0  | 0  | Not-determined | Genome-fragment | NA    | 0    |
| 57_extracted_92455          | 2320  | No  | NA | 0  | 0  | Not-determined | Genome-fragment | NA    | 0    |
| 57_extracted_92456          | 1243  | No  | NA | 0  | 1  | Not-determined | Genome-fragment | NA    | 0    |
| 57_vs_121796  full          | 2091  | No  | NA | 0  | 2  | Low-quality    | Genome-fragment | 2.15  | 0    |
| 57_extracted_92518          | 1130  | No  | NA | 0  | 0  | Not-determined | Genome-fragment | NA    | 0    |
| 57_extracted_92621          | 1355  | No  | NA | 0  | 0  | Not-determined | Genome-fragment | NA    | 0    |
| 57_extracted_92642          | 3613  | No  | NA | 0  | 4  | Not-determined | Genome-fragment | NA    | 0    |
| 516_vs_82001  full          | 2091  | No  | NA | 2  | 0  | Low-quality    | Genome-fragment | 5.1   | 0    |
| 57_extracted_92759          | 3658  | No  | NA | 0  | 3  | Not-determined | Genome-fragment | NA    | 0    |
| 57_extracted_92843          | 1407  | No  | NA | 0  | 0  | Not-determined | Genome-fragment | NA    | 0    |
| 57_extracted_92875          | 1528  | No  | NA | 0  | 2  | Not-determined | Genome-fragment | NA    | 0    |
| 57_extracted_92934          | 1777  | No  | NA | 0  | 2  | Not-determined | Genome-fragment | NA    | 0    |
| 57_extracted_92941          | 1129  | No  | NA | 0  | 3  | Not-determined | Genome-fragment | NA    | 0    |
| 512_vs_k141_114421  full    | 2091  | No  | NA | 0  | 1  | Low-quality    | Genome-fragment | 2.91  | 0    |
| 57_extracted_93165          | 9786  | No  | NA | 0  | 4  | Not-determined | Genome-fragment | NA    | 0    |
| 57_extracted_93423          | 2827  | No  | NA | 0  | 3  | Not-determined | Genome-fragment | NA    | 0    |
| 57_extracted_93532          | 1109  | No  | NA | 0  | 0  | Not-determined | Genome-fragment | NA    | 0    |
| 58_vs_k141_21745  full      | 2091  | No  | NA | 1  | 0  | Low-quality    | Genome-fragment | 1.84  | 0    |
| 59_vs_k141_24095  full      | 2092  | No  | NA | 0  | 0  | Low-quality    | Genome-fragment | 2.81  | 0    |
| 511_vs_k141_12406  full     | 2092  | No  | NA | 2  | 0  | Low-quality    | Genome-fragment | 6.24  | 0    |
| 57_extracted_93871          | 1500  | No  | NA | 0  | 0  | Not-determined | Genome-fragment | NA    | 0    |
| 57_extracted_93876          | 2694  | No  | NA | 0  | 0  | Not-determined | Genome-fragment | NA    | 0    |
| 57_extracted_93927          | 1035  | No  | NA | 0  | 1  | Not-determined | Genome-fragment | NA    | 0    |
| 57_extracted_93994          | 1116  | No  | NA | 0  | 1  | Not-determined | Genome-fragment | NA    | 0    |
| 57_extracted_94176          | 1011  | No  | NA | 0  | 1  | Not-determined | Genome-fragment | NA    | 0    |
| 57_extracted_94337          | 1915  | No  | NA | 0  | 1  | Not-determined | Genome-fragment | NA    | 0    |
| 57_extracted_94349          | 1952  | No  | NA | 0  | 1  | Not-determined | Genome-fragment | NA    | 0    |
| 57_extracted_94474          | 3197  | No  | NA | 0  | 1  | Not-determined | Genome-fragment | NA    | 0    |
| 511_vs_k141_98978  lit2gene | 2092  | No  | NA | 1  | 0  | Low-quality    | Genome-fragment | 6.42  | 0    |
| 57_extracted_94518          | 1578  | No  | NA | 0  | 0  | Not-determined | Genome-fragment | NA    | 0    |
| 57_extracted_94535          | 2117  | No  | NA | 0  | 1  | Not-determined | Genome-fragment | NA    | 0    |
| 57_extracted_94570          | 2278  | No  | NA | 0  | 1  | Not-determined | Genome-fragment | NA    | 0    |
| 57_extracted_94570          | 1036  | No  | NA | 0  | 1  | Not-determined | Genome-fragment | NA    | 0    |
| 57_extracted_94662          | 1053  | No  | NA | 0  | 0  | Not-determined | Genome-fragment | NA    | 0    |
| 57_extracted_94935          | 1130  | No  | NA | 0  | 0  | Not-determined | Genome-fragment | NA    | 0    |
| 513_vs_90245  full          | 2092  | No  | NA | 0  | 1  | Low-quality    | Genome-fragment | 0.93  | 0    |
| 57_extracted_94954          | 2214  | No  | NA | 0  | 3  | Not-determined | Genome-fragment | NA    | 0    |
| 57_extracted_94964          | 1217  | No  | NA | 0  | 1  | Not-determined | Genome-fragment | NA    | 0    |
| 514_vs_k141_83896  full     | 2092  | No  |    |    |    |                |                 |       |      |



|                          |       |     |    |   |    |                |                 |    |       |       |
|--------------------------|-------|-----|----|---|----|----------------|-----------------|----|-------|-------|
| 57_extracted_97244       | 3228  | No  | NA | 0 | 0  | Not-determined | Genome-fragment | NA | 0     | 0     |
| 58_vs_k141_148553  full  | 2093  | No  | NA | 0 | 0  | Low-quality    | Genome-fragment | NA | 3.78  | 0     |
| 514_vs_k141_40365  full  | 2094  | No  | NA | 2 | 0  | Low-quality    | Genome-fragment | NA | 5.02  | 0     |
| 57_extracted_97911       | 3773  | No  | NA | 0 | 3  | Not-determined | Genome-fragment | NA | 0     | 0     |
| 57_extracted_97961       | 6849  | No  | NA | 0 | 2  | Not-determined | Genome-fragment | NA | 0     | 0     |
| 57_extracted_98052       | 3766  | No  | NA | 0 | 2  | Not-determined | Genome-fragment | NA | 0     | 0     |
| 51_extracted_k141_3327   | 2094  | No  | NA | 1 | 0  | Low-quality    | Genome-fragment | NA | 5.84  | 0     |
| 57_extracted_15074       | 2094  | No  | NA | 0 | 0  | Low-quality    | Genome-fragment | NA | 1.48  | 0     |
| 57_vs_40576  full        | 2094  | No  | NA | 0 | 3  | Low-quality    | Genome-fragment | NA | 1.26  | 0     |
| 57_vs_123563  full       | 2094  | No  | NA | 3 | 0  | Low-quality    | Genome-fragment | NA | 4.62  | 0     |
| 512_vs_k141_183420  full | 2094  | No  | NA | 0 | 0  | Low-quality    | Genome-fragment | NA | 3.76  | 0     |
| 57_extracted_98613       | 1999  | No  | NA | 0 | 1  | Not-determined | Genome-fragment | NA | 0     | 0     |
| 57_extracted_98634       | 1136  | No  | NA | 0 | 1  | Not-determined | Genome-fragment | NA | 0     | 0     |
| 57_extracted_98711       | 1281  | No  | NA | 0 | 1  | Not-determined | Genome-fragment | NA | 0     | 0     |
| 57_extracted_98759       | 1257  | No  | NA | 0 | 1  | Not-determined | Genome-fragment | NA | 0     | 0     |
| 57_extracted_98838       | 1264  | No  | NA | 0 | 2  | Not-determined | Genome-fragment | NA | 0     | 0     |
| 57_extracted_98881       | 1248  | No  | NA | 0 | 0  | Not-determined | Genome-fragment | NA | 0     | 0     |
| 57_extracted_98885       | 4700  | No  | NA | 0 | 1  | Not-determined | Genome-fragment | NA | 0     | 0     |
| 57_extracted_98978       | 1203  | No  | NA | 0 | 0  | Not-determined | Genome-fragment | NA | 0     | 0     |
| 517_extracted_k141_47059 | 2095  | No  | NA | 1 | 0  | Low-quality    | Genome-fragment | NA | 1.8   | 0     |
| 57_extracted_99062       | 7177  | No  | NA | 0 | 5  | Not-determined | Genome-fragment | NA | 0     | 0     |
| 57_extracted_99070       | 1729  | No  | NA | 0 | 3  | Not-determined | Genome-fragment | NA | 0     | 0     |
| 517_vs_k141_92137  full  | 2095  | No  | NA | 0 | 1  | Low-quality    | Genome-fragment | NA | 2.9   | 0     |
| 514_vs_k141_30891  full  | 2095  | No  | NA | 1 | 0  | Low-quality    | Genome-fragment | NA | 3.37  | 0     |
| 57_extracted_99204       | 1203  | No  | NA | 0 | 1  | Not-determined | Genome-fragment | NA | 0     | 0     |
| 57_extracted_99223       | 2174  | No  | NA | 0 | 0  | Not-determined | Genome-fragment | NA | 0     | 0     |
| 516_vs_107563  full      | 2095  | No  | NA | 0 | 2  | Low-quality    | Genome-fragment | NA | 1.21  | 0     |
| 57_extracted_99413       | 2042  | No  | NA | 0 | 0  | Not-determined | Genome-fragment | NA | 0     | 0     |
| 57_extracted_99627       | 1070  | No  | NA | 0 | 1  | Not-determined | Genome-fragment | NA | 0     | 0     |
| 57_extracted_99806       | 1604  | No  | NA | 0 | 2  | Not-determined | Genome-fragment | NA | 0     | 0     |
| 58_extracted_k141_197342 | 2095  | No  | NA | 2 | 0  | Low-quality    | Genome-fragment | NA | 4.19  | 0     |
| 57_extracted_100090      | 1311  | No  | NA | 1 | 2  | Not-determined | Genome-fragment | NA | 0     | 0     |
| 57_extracted_100289      | 5241  | No  | NA | 0 | 2  | Not-determined | Genome-fragment | NA | 0     | 0     |
| 57_extracted_100422      | 4651  | No  | NA | 0 | 6  | Not-determined | Genome-fragment | NA | 0     | 0     |
| 58_vs_k141_53377  full   | 2095  | No  | NA | 1 | 0  | Low-quality    | Genome-fragment | NA | 2.37  | 0     |
| 57_extracted_100604      | 1813  | No  | NA | 0 | 0  | Not-determined | Genome-fragment | NA | 0     | 0     |
| 517_extracted_k141_13321 | 2096  | No  | NA | 0 | 1  | Low-quality    | Genome-fragment | NA | 4.35  | 0     |
| 513_extracted_11911      | 2096  | No  | NA | 0 | 1  | Low-quality    | Genome-fragment | NA | 1.08  | 0     |
| 57_extracted_100690      | 1389  | No  | NA | 0 | 1  | Not-determined | Genome-fragment | NA | 0     | 0     |
| 57_extracted_100750      | 1510  | No  | NA | 0 | 2  | Not-determined | Genome-fragment | NA | 0     | 0     |
| 57_extracted_100932      | 1628  | No  | NA | 0 | 1  | Not-determined | Genome-fragment | NA | 0     | 0     |
| 55_extracted_k141_14964  | 2096  | No  | NA | 0 | 0  | Low-quality    | Genome-fragment | NA | 4.8   | 0     |
| 57_extracted_101000      | 3297  | No  | NA | 0 | 1  | Not-determined | Genome-fragment | NA | 0     | 0     |
| 57_extracted_101179      | 1025  | No  | NA | 0 | 0  | Not-determined | Genome-fragment | NA | 0     | 0     |
| 57_extracted_101245      | 1382  | No  | NA | 0 | 0  | Not-determined | Genome-fragment | NA | 0     | 0     |
| 57_extracted_101391      | 1284  | No  | NA | 0 | 0  | Not-determined | Genome-fragment | NA | 0     | 0     |
| 516_extracted_139264     | 2096  | No  | NA | 2 | 0  | Low-quality    | Genome-fragment | NA | 11.53 | 0     |
| 57_extracted_101497      | 7515  | No  | NA | 0 | 9  | Not-determined | Genome-fragment | NA | 0     | 0     |
| 57_extracted_101629      | 1245  | No  | NA | 0 | 0  | Not-determined | Genome-fragment | NA | 0     | 0     |
| 516_vs_142922  full      | 2096  | No  | NA | 2 | 0  | Low-quality    | Genome-fragment | NA | 5.89  | 0     |
| 512_vs_k141_62023  full  | 2096  | No  | NA | 1 | 0  | Low-quality    | Genome-fragment | NA | 3.24  | 0     |
| 57_extracted_102151      | 2356  | No  | NA | 0 | 0  | Not-determined | Genome-fragment | NA | 0     | 0     |
| 517_vs_k141_25382  full  | 2097  | No  | NA | 0 | 0  | Low-quality    | Genome-fragment | NA | 4.73  | 0     |
| 59_vs_k141_79520  full   | 2097  | No  | NA | 2 | 0  | Low-quality    | Genome-fragment | NA | 5.03  | 0     |
| 57_extracted_102394      | 2306  | No  | NA | 1 | 1  | Not-determined | Genome-fragment | NA | 0     | 0     |
| 57_extracted_102478      | 1823  | No  | NA | 0 | 1  | Not-determined | Genome-fragment | NA | 0     | 0     |
| 57_extracted_102646      | 1142  | No  | NA | 0 | 1  | Not-determined | Genome-fragment | NA | 0     | 0     |
| 57_extracted_102977      | 1414  | No  | NA | 0 | 1  | Not-determined | Genome-fragment | NA | 0     | 0     |
| 57_extracted_103054      | 2614  | No  | NA | 1 | 1  | Not-determined | Genome-fragment | NA | 0     | 0     |
| 57_extracted_103064      | 1179  | No  | NA | 0 | 1  | Not-determined | Genome-fragment | NA | 0     | 0     |
| 57_extracted_103236      | 1059  | No  | NA | 0 | 1  | Not-determined | Genome-fragment | NA | 0     | 0     |
| 57_extracted_103244      | 1194  | No  | NA | 0 | 0  | Not-determined | Genome-fragment | NA | 0     | 0     |
| 511_vs_k141_69329  full  | 2097  | No  | NA | 2 | 0  | Low-quality    | Genome-fragment | NA | 4     | 0     |
| 57_extracted_103409      | 5416  | No  | NA | 0 | 0  | Not-determined | Genome-fragment | NA | 0     | 0     |
| 57_vs_116510  full       | 2097  | No  | NA | 0 | 0  | Low-quality    | Genome-fragment | NA | 3.17  | 0     |
| 57_extracted_103529      | 1079  | No  | NA | 0 | 0  | Not-determined | Genome-fragment | NA | 0     | 0     |
| 57_extracted_103636      | 1013  | No  | NA | 0 | 1  | Not-determined | Genome-fragment | NA | 0     | 0     |
| 57_extracted_103766      | 1027  | No  | NA | 0 | 0  | Not-determined | Genome-fragment | NA | 0     | 0     |
| 57_extracted_103767      | 1359  | No  | NA | 0 | 1  | Not-determined | Genome-fragment | NA | 0     | 0     |
| 57_extracted_103801      | 1298  | No  | NA | 0 | 1  | Not-determined | Genome-fragment | NA | 0     | 0     |
| 56_vs_k141_11570  full   | 2097  | No  | NA | 0 | 0  | Low-quality    | Genome-fragment | NA | 4.81  | 0     |
| 57_extracted_103911      | 1193  | No  | NA | 1 | 1  | Not-determined | Genome-fragment | NA | 0     | 0     |
| 57_extracted_103920      | 1149  | No  | NA | 0 | 2  | Not-determined | Genome-fragment | NA | 0     | 0     |
| 59_vs_k141_71018  full   | 2098  | No  | NA | 1 | 0  | Low-quality    | Genome-fragment | NA | 0.9   | 0     |
| 57_extracted_103964      | 1584  | No  | NA | 1 | 1  | Not-determined | Genome-fragment | NA | 0     | 0     |
| 57_extracted_104021      | 1006  | No  | NA | 0 | 0  | Not-determined | Genome-fragment | NA | 0     | 0     |
| 57_extracted_104038      | 1142  | No  | NA | 0 | 0  | Not-determined | Genome-fragment | NA | 0     | 0     |
| 57_extracted_104181      | 1737  | No  | NA | 0 | 1  | Not-determined | Genome-fragment | NA | 0     | 0     |
| 57_extracted_104328      | 1069  | No  | NA | 0 | 0  | Not-determined | Genome-fragment | NA | 0     | 0     |
| 57_extracted_104698      | 3134  | No  | NA | 0 | 1  | Not-determined | Genome-fragment | NA | 0     | 0     |
| 57_extracted_104774      | 1089  | No  | NA | 0 | 0  | Not-determined | Genome-fragment | NA | 0     | 0     |
| 57_extracted_104833      | 4951  | No  | NA | 3 | 1  | Not-determined | Genome-fragment | NA | 0     | 0     |
| 57_extracted_104890      | 6313  | No  | NA | 0 | 3  | Not-determined | Genome-fragment | NA | 0     | 0     |
| 57_extracted_104899      | 9124  | No  | NA | 0 | 3  | Not-determined | Genome-fragment | NA | 0     | 0     |
| 57_extracted_104942      | 2643  | No  | NA | 0 | 1  | Not-determined | Genome-fragment | NA | 0     | 0     |
| 51_vs_k141_118317  full  | 2098  | No  | NA | 0 | 1  | Low-quality    | Genome-fragment | NA | 3.96  | 0     |
| 57_vs_6963  full         | 2098  | No  | NA | 0 | 2  | Low-quality    | Genome-fragment | NA | 2.6   | 0     |
| 57_extracted_105121      | 1223  | No  | NA | 0 | 0  | Not-determined | Genome-fragment | NA | 0     | 0     |
| 57_extracted_105261      | 1430  | No  | NA | 0 | 0  | Not-determined | Genome-fragment | NA | 0     | 0     |
| 57_extracted_105312      | 1500  | No  | NA | 0 | 0  | Not-determined | Genome-fragment | NA | 0     | 0     |
| 57_extracted_105559      | 1444  | No  | NA | 0 | 2  | Not-determined | Genome-fragment | NA | 0     | 0     |
| 516_vs_109874  full      | 2098  | No  | NA | 0 | 0  | Low-quality    | Genome-fragment | NA | 3.34  | 0     |
| 57_extracted_105984      | 1059  | No  | NA | 0 | 1  | Not-determined | Genome-fragment | NA | 0     | 0     |
| 57_extracted_105986      | 6481  | No  | NA | 0 | 7  | Not-determined | Genome-fragment | NA | 0     | 0     |
| 57_extracted_106192      | 1869  | No  | NA | 0 | 1  | Not-determined | Genome-fragment | NA | 0     | 0     |
| 57_extracted_106381      | 2566  | No  | NA | 0 | 1  | Not-determined | Genome-fragment | NA | 0     | 0     |
| 57_extracted_106497      | 5086  | No  | NA | 0 | 1  | Not-determined | Genome-fragment | NA | 0     | 0     |
| 57_extracted_106718      | 1151  | No  | NA | 0 | 1  | Not-determined | Genome-fragment | NA | 0     | 0     |
| 511_extracted_k141_13747 | 2099  | No  | NA | 0 | 1  | Low-quality    | Genome-fragment | NA | 0.19  | 0     |
| 516_extracted_120865     | 2099  | No  | NA | 0 | 1  | Low-quality    | Genome-fragment | NA | 2.99  | 0     |
| 57_extracted_107158      | 4361  | No  | NA | 0 | 2  | Not-determined | Genome-fragment | NA | 0     | 0     |
| 57_extracted_107195      | 4220  | No  | NA | 0 | 2  | Not-determined | Genome-fragment | NA | 0     | 0     |
| 57_extracted_107291      | 1376  | No  | NA | 0 | 0  | Not-determined | Genome-fragment | NA | 0     | 0     |
| 57_extracted_107366      | 1175  | No  | NA | 0 | 1  | Not-determined | Genome-fragment | NA | 0     | 0     |
| 57_extracted_107654      | 4239  | No  | NA | 0 | 2  | Not-determined | Genome-fragment | NA | 0     | 0     |
| 57_extracted_107792      | 1947  | No  | NA | 0 | 0  | Not-determined | Genome-fragment | NA | 0     | 0     |
| 57_extracted_107801      | 3924  | No  | NA | 0 | 4  | Not-determined | Genome-fragment | NA | 0     | 0     |
| 57_extracted_107882      | 3760  | No  | NA | 0 | 4  | Not-determined | Genome-fragment | NA | 0     | 0     |
| 58_vs_k141_163506  full  | 2099  | No  | NA | 0 | 0  | Low-quality    | Genome-fragment | NA | 4.2   | 0     |
| 57_extracted_108155      | 8819  | No  | NA | 0 | 3  | Not-determined | Genome-fragment | NA | 0     | 0     |
| 59_vs_k141_59895  full   | 2100  | No  | NA | 0 | 1  | Low-quality    | Genome-fragment | NA | 0.84  | 0     |
| 510_vs_117551  full      | 2100  | No  | NA | 0 | 3  | Low-quality    | Genome-fragment | NA | 0.61  | 0     |
| 57_extracted_108324      | 5416  | No  | NA | 0 | 5  | Not-determined | Genome-fragment | NA | 0     | 0     |
| 512_vs_k141_74070  full  | 2100  | No  | NA | 1 | 0  | Low-quality    | Genome-fragment | NA | 5.72  | 0     |
| 58_extracted_k141_24428  | 2100  | No  | NA | 0 | 0  | Low-quality    | Genome-fragment | NA | 1.97  | 0     |
| 514_extracted_k141_67892 | 2101  | No  | NA | 0 | 0  | Low-quality    | Genome-fragment | NA | 1.63  | 0     |
| 57_vs_75087  full        | 2101  | Yes | NA | 1 | 1  | Low-quality    | Genome-fragment | NA | 1.99  | 22.56 |
| 516_vs_59892  full       | 2101  | No  | NA | 0 | 1  | Low-quality    | Genome-fragment | NA | 1.19  | 0     |
| 57_extracted_108663      | 1979  | No  | NA | 0 | 2  | Not-determined | Genome-fragment | NA | 0     | 0     |
| 516_vs_154881  full      | 2101  | No  | NA | 1 | 0  | Low-quality    | Genome-fragment | NA | 3.66  | 0     |
| 57_extracted_108885      | 22864 | No  | NA | 0 | 15 | Not-determined | Genome-fragment | NA | 0     | 0     |
| 57_extracted_109011      | 6675  | No  | NA | 0 | 1  | Not-determined | Genome-fragment | NA | 0     | 0     |
| 57_extracted_109054      | 1103  | No  | NA | 0 | 1  | Not-determined | Genome-fragment | NA | 0     | 0     |
| 58_extracted_k141_380    | 2101  | No  | NA | 0 | 0  | Low-quality    | Genome-fragment | NA | 4.35  | 0     |
| 57_extracted_109266      | 1247  | No  | NA | 0 | 1  | Not-determined | Genome-fragment | NA | 0     | 0     |
| 59_extracted_k141_49113  | 2102  | No  | NA | 0 | 0  | Low-quality    | Genome-fragment | NA | 4.83  | 0     |
| 511_vs_k141_58558  full  | 2102  | No  | NA | 0 | 0  | Low-quality    | Genome-fragment | NA | 5.68  | 0     |
| 517_vs_k141_535627  full | 2103  | No  | NA | 0 | 0  | Low-quality    | Genome-fragment | NA | 4.68  | 0     |
| 57_extracted_109814      | 1432  | No  | NA | 0 | 1  | Not-determined | Genome-fragment | NA | 0     | 0     |
| 512_vs_k141_35342  full  | 2103  | No  | NA | 0 | 0  | Low-quality    | Genome-fragment | NA | 3.48  | 0     |
| 57_extracted_109893      | 3649  | No  | NA | 0 | 2  | Not-determined | Genome-fragment | NA | 0     | 0     |
| 57_extracted_109906      | 1483  | No  | NA | 0 | 2  | Not-determined | Genome-fragment | NA | 0     | 0     |
| 57_extracted_109926      | 1264  | No  | NA | 0 | 1  | Not-determined | Genome-fragment | NA | 0     | 0     |
| 57_extracted_110011      | 1671  | No  | NA | 0 | 1  | Not-determined | Genome-fragment | NA | 0     | 0     |
| 58_extracted_k141_137562 | 2103  | No  | NA | 0 | 0  | Low-quality    | Genome-fragment | NA | 1.95  | 0     |
| 57_extracted_110148      | 2633  | No  | NA | 0 | 1  | Not-determined | Genome-fragment | NA | 0     | 0     |
| 58_extracted_k141_190895 | 2103  | No  | NA | 0 | 0  | Low-quality    | Genome-fragment | NA | 0.2   | 0     |
| 57_extracted_110665      | 2322  | No  | NA | 0 | 0  | Not-determined | Genome-fragment | NA | 0     | 0</   |



|                          |          |       |    |    |   |   |                |                 |      |   |
|--------------------------|----------|-------|----|----|---|---|----------------|-----------------|------|---|
| 55_vs_k141_41761         | [full]   | 2106  | No | NA | 3 | 0 | Low-quality    | Genome-fragment | 3.64 | 0 |
| 512_vs_k141_22274        | [full]   | 2106  | No | NA | 1 | 0 | Low-quality    | Genome-fragment | 0.73 | 0 |
| 54_extracted_11304       |          | 2106  | No | NA | 0 | 0 | Low-quality    | Genome-fragment | 5.34 | 0 |
| 57_extracted_115096      |          | 1946  | No | NA | 0 | 2 | Not-determined | Genome-fragment | NA   | 0 |
| 57_extracted_115195      |          | 1405  | No | NA | 0 | 0 | Not-determined | Genome-fragment | NA   | 0 |
| 57_extracted_115433      |          | 3015  | No | NA | 0 | 2 | Not-determined | Genome-fragment | NA   | 0 |
| 57_extracted_115536      |          | 1031  | No | NA | 0 | 2 | Not-determined | Genome-fragment | NA   | 0 |
| 53_vs_k141_47238         | [full]   | 2107  | No | NA | 1 | 0 | Low-quality    | Genome-fragment | 5.03 | 0 |
| 57_extracted_115745      |          | 5470  | No | NA | 1 | 1 | Not-determined | Genome-fragment | NA   | 0 |
| 57_vs_90842              | [full]   | 2107  | No | NA | 0 | 0 | Low-quality    | Genome-fragment | 3.52 | 0 |
| 516_extracted_156214     |          | 2107  | No | NA | 2 | 0 | Low-quality    | Genome-fragment | 2.54 | 0 |
| 57_extracted_115989      |          | 2243  | No | NA | 0 | 0 | Not-determined | Genome-fragment | NA   | 0 |
| 57_extracted_116110      |          | 1824  | No | NA | 0 | 0 | Not-determined | Genome-fragment | NA   | 0 |
| 57_extracted_116117      |          | 1760  | No | NA | 0 | 0 | Not-determined | Genome-fragment | NA   | 0 |
| 57_extracted_116229      |          | 1259  | No | NA | 0 | 2 | Not-determined | Genome-fragment | NA   | 0 |
| 57_extracted_116266      |          | 1044  | No | NA | 1 | 2 | Not-determined | Genome-fragment | NA   | 0 |
| 57_extracted_116454      |          | 3275  | No | NA | 0 | 0 | Not-determined | Genome-fragment | NA   | 0 |
| 57_extracted_116475      |          | 3518  | No | NA | 0 | 2 | Not-determined | Genome-fragment | NA   | 0 |
| 57_extracted_116585      |          | 1016  | No | NA | 0 | 0 | Not-determined | Genome-fragment | NA   | 0 |
| 57_extracted_116668      |          | 2365  | No | NA | 0 | 1 | Not-determined | Genome-fragment | NA   | 0 |
| 57_extracted_116793      |          | 1848  | No | NA | 0 | 0 | Not-determined | Genome-fragment | NA   | 0 |
| 57_extracted_116913      |          | 1566  | No | NA | 0 | 2 | Not-determined | Genome-fragment | NA   | 0 |
| 57_extracted_116994      |          | 11810 | No | NA | 0 | 3 | Not-determined | Genome-fragment | NA   | 0 |
| 57_extracted_117215      |          | 1319  | No | NA | 0 | 1 | Not-determined | Genome-fragment | NA   | 0 |
| 516_vs_144786            | [full]   | 2107  | No | NA | 1 | 0 | Low-quality    | Genome-fragment | 0.59 | 0 |
| 58_extracted_k141_192151 |          | 2107  | No | NA | 0 | 0 | Low-quality    | Genome-fragment | 0.2  | 0 |
| 517_vs_k141_147571       | [full]   | 2108  | No | NA | 0 | 0 | Low-quality    | Genome-fragment | 6.6  | 0 |
| 57_extracted_117697      |          | 40769 | No | NA | 9 | 1 | High-quality   | High-quality    | 100  | 0 |
| 59_vs_k141_28152         | [full]   | 2108  | No | NA | 0 | 0 | Low-quality    | Genome-fragment | 2.81 | 0 |
| 57_extracted_118106      |          | 1976  | No | NA | 0 | 2 | Not-determined | Genome-fragment | NA   | 0 |
| 57_extracted_118171      |          | 1443  | No | NA | 0 | 0 | Not-determined | Genome-fragment | NA   | 0 |
| 57_extracted_118212      |          | 1146  | No | NA | 1 | 2 | Not-determined | Genome-fragment | NA   | 0 |
| 57_extracted_118346      |          | 3477  | No | NA | 0 | 1 | Not-determined | Genome-fragment | NA   | 0 |
| 53_extracted_k141_71608  |          | 2108  | No | NA | 0 | 0 | Low-quality    | Genome-fragment | 1.57 | 0 |
| 58_extracted_k141_27237  |          | 2108  | No | NA | 1 | 0 | Low-quality    | Genome-fragment | 4.59 | 0 |
| 57_extracted_118411      |          | 1913  | No | NA | 0 | 1 | Not-determined | Genome-fragment | NA   | 0 |
| 57_extracted_118482      |          | 1533  | No | NA | 0 | 1 | Not-determined | Genome-fragment | NA   | 0 |
| 57_extracted_118483      |          | 1164  | No | NA | 0 | 0 | Not-determined | Genome-fragment | NA   | 0 |
| 57_extracted_118667      |          | 1117  | No | NA | 1 | 1 | Not-determined | Genome-fragment | NA   | 0 |
| 57_extracted_118727      |          | 1483  | No | NA | 0 | 2 | Not-determined | Genome-fragment | NA   | 0 |
| 58_extracted_k141_171521 |          | 2108  | No | NA | 0 | 0 | Low-quality    | Genome-fragment | 4.79 | 0 |
| 58_vs_k141_63142         | [H2gene] | 2108  | No | NA | 0 | 0 | Low-quality    | Genome-fragment | 5.65 | 0 |
| 59_vs_k141_2442          | [full]   | 2109  | No | NA | 0 | 3 | Low-quality    | Genome-fragment | 1.12 | 0 |
| 514_vs_k141_83398        | [full]   | 2109  | No | NA | 0 | 0 | Low-quality    | Genome-fragment | 4.5  | 0 |
| 514_vs_k141_35653        | [full]   | 1174  | No | NA | 2 | 0 | Low-quality    | Genome-fragment | 4.53 | 0 |
| 57_extracted_118367      |          | 1174  | No | NA | 1 | 1 | Not-determined | Genome-fragment | NA   | 0 |
| 57_extracted_119410      |          | 1122  | No | NA | 0 | 1 | Not-determined | Genome-fragment | NA   | 0 |
| 57_vs_50633              | [H2gene] | 2109  | No | NA | 2 | 0 | Low-quality    | Genome-fragment | 6.16 | 0 |
| 57_extracted_119573      |          | 1011  | No | NA | 2 | 2 | Not-determined | Genome-fragment | NA   | 0 |
| 57_extracted_119622      |          | 7182  | No | NA | 0 | 2 | Not-determined | Genome-fragment | NA   | 0 |
| 59_vs_k141_66204         | [full]   | 2110  | No | NA | 0 | 0 | Low-quality    | Genome-fragment | 2.99 | 0 |
| 57_extracted_119805      |          | 1022  | No | NA | 1 | 2 | Not-determined | Genome-fragment | NA   | 0 |
| 55_extracted_k141_133163 |          | 2110  | No | NA | 2 | 0 | Low-quality    | Genome-fragment | 5.13 | 0 |
| 57_extracted_119897      |          | 1974  | No | NA | 0 | 1 | Not-determined | Genome-fragment | NA   | 0 |
| 57_extracted_119974      |          | 1045  | No | NA | 0 | 0 | Not-determined | Genome-fragment | NA   | 0 |
| 516_vs_1377              | [full]   | 2110  | No | NA | 0 | 3 | Low-quality    | Genome-fragment | 5.42 | 0 |
| 516_vs_27554             | [full]   | 2110  | No | NA | 0 | 0 | Low-quality    | Genome-fragment | 2.92 | 0 |
| 57_extracted_120452      |          | 1353  | No | NA | 0 | 0 | Not-determined | Genome-fragment | NA   | 0 |
| 57_extracted_120534      |          | 1601  | No | NA | 1 | 1 | Not-determined | Genome-fragment | NA   | 0 |
| 57_extracted_120617      |          | 1351  | No | NA | 0 | 0 | Not-determined | Genome-fragment | NA   | 0 |
| 57_extracted_120791      |          | 5487  | No | NA | 0 | 1 | Not-determined | Genome-fragment | NA   | 0 |
| 57_extracted_120896      |          | 4948  | No | NA | 1 | 1 | Not-determined | Genome-fragment | NA   | 0 |
| 57_extracted_120936      |          | 3036  | No | NA | 0 | 0 | Not-determined | Genome-fragment | NA   | 0 |
| 57_extracted_120953      |          | 9388  | No | NA | 0 | 2 | Not-determined | Genome-fragment | NA   | 0 |
| 57_extracted_120999      |          | 1029  | No | NA | 1 | 1 | Not-determined | Genome-fragment | NA   | 0 |
| 58_vs_k141_208148        | [full]   | 2110  | No | NA | 1 | 0 | Low-quality    | Genome-fragment | 0.69 | 0 |
| 57_extracted_121158      |          | 1072  | No | NA | 0 | 2 | Not-determined | Genome-fragment | NA   | 0 |
| 514_extracted_k141_39505 |          | 2111  | No | NA | 1 | 0 | Low-quality    | Genome-fragment | 1.3  | 0 |
| 57_extracted_121168      |          | 1495  | No | NA | 0 | 0 | Not-determined | Genome-fragment | NA   | 0 |
| 514_extracted_k141_99933 |          | 2111  | No | NA | 0 | 0 | Low-quality    | Genome-fragment | 2.88 | 0 |
| 51_vs_k141_11508         | [full]   | 2111  | No | NA | 0 | 0 | Low-quality    | Genome-fragment | 3.61 | 0 |
| 57_extracted_121301      |          | 1177  | No | NA | 0 | 0 | Not-determined | Genome-fragment | NA   | 0 |
| 57_extracted_121350      |          | 1828  | No | NA | 0 | 0 | Not-determined | Genome-fragment | NA   | 0 |
| 57_extracted_121442      |          | 2475  | No | NA | 0 | 2 | Not-determined | Genome-fragment | NA   | 0 |
| 57_extracted_121495      |          | 3715  | No | NA | 1 | 1 | Not-determined | Genome-fragment | NA   | 0 |
| 57_extracted_121511      |          | 1079  | No | NA | 0 | 1 | Not-determined | Genome-fragment | NA   | 0 |
| 57_extracted_121522      |          | 1216  | No | NA | 0 | 1 | Not-determined | Genome-fragment | NA   | 0 |
| 57_extracted_121530      |          | 1188  | No | NA | 0 | 0 | Not-determined | Genome-fragment | NA   | 0 |
| 53_extracted_k141_11198  |          | 2111  | No | NA | 0 | 0 | Low-quality    | Genome-fragment | 1.38 | 0 |
| 57_extracted_121815      |          | 1044  | No | NA | 0 | 2 | Not-determined | Genome-fragment | NA   | 0 |
| 57_extracted_121848      |          | 1478  | No | NA | 0 | 0 | Not-determined | Genome-fragment | NA   | 0 |
| 55_extracted_k141_140377 |          | 2111  | No | NA | 0 | 0 | Low-quality    | Genome-fragment | 1.47 | 0 |
| 57_extracted_121981      |          | 1121  | No | NA | 0 | 1 | Not-determined | Genome-fragment | NA   | 0 |
| 57_extracted_122010      |          | 1373  | No | NA | 0 | 0 | Not-determined | Genome-fragment | NA   | 0 |
| 57_extracted_122063      |          | 1017  | No | NA | 1 | 2 | Not-determined | Genome-fragment | NA   | 0 |
| 57_extracted_122078      |          | 1781  | No | NA | 0 | 2 | Not-determined | Genome-fragment | NA   | 0 |
| 55_extracted_k141_51838  |          | 2111  | No | NA | 1 | 0 | Low-quality    | Genome-fragment | 6.03 | 0 |
| 57_extracted_122208      |          | 1057  | No | NA | 0 | 0 | Not-determined | Genome-fragment | NA   | 0 |
| 57_extracted_122277      |          | 1618  | No | NA | 0 | 0 | Not-determined | Genome-fragment | NA   | 0 |
| 57_extracted_122376      |          | 1789  | No | NA | 0 | 0 | Not-determined | Genome-fragment | NA   | 0 |
| 55_vs_k141_139790        | [full]   | 2111  | No | NA | 0 | 1 | Low-quality    | Genome-fragment | 1.47 | 0 |
| 57_extracted_122484      |          | 1398  | No | NA | 0 | 1 | Not-determined | Genome-fragment | NA   | 0 |
| 57_extracted_122576      |          | 1035  | No | NA | 0 | 1 | Not-determined | Genome-fragment | NA   | 0 |
| 57_extracted_122718      |          | 5413  | No | NA | 0 | 2 | Not-determined | Genome-fragment | NA   | 0 |
| 57_extracted_122753      |          | 9910  | No | NA | 1 | 3 | Not-determined | Genome-fragment | NA   | 0 |
| 57_extracted_122760      |          | 1134  | No | NA | 0 | 0 | Not-determined | Genome-fragment | NA   | 0 |
| 55_vs_k141_90192         | [full]   | 2111  | No | NA | 0 | 2 | Low-quality    | Genome-fragment | 1.37 | 0 |
| 57_extracted_829         |          | 2111  | No | NA | 0 | 1 | Low-quality    | Genome-fragment | 4.06 | 0 |
| 57_extracted_123090      |          | 1066  | No | NA | 0 | 0 | Not-determined | Genome-fragment | NA   | 0 |
| 57_vs_7542               | [H2gene] | 2111  | No | NA | 2 | 0 | Low-quality    | Genome-fragment | 5.47 | 0 |
| 510_vs_3460              | [full]   | 2111  | No | NA | 0 | 0 | Low-quality    | Genome-fragment | 4.69 | 0 |
| 57_extracted_123212      |          | 1311  | No | NA | 1 | 1 | Not-determined | Genome-fragment | NA   | 0 |
| 515_extracted_70071      |          | 2111  | No | NA | 0 | 1 | Low-quality    | Genome-fragment | 1.18 | 0 |
| 58_vs_k141_157532        | [full]   | 2111  | No | NA | 0 | 0 | Low-quality    | Genome-fragment | 5.23 | 0 |
| 57_extracted_123407      |          | 1413  | No | NA | 0 | 0 | Not-determined | Genome-fragment | NA   | 0 |
| 57_extracted_123462      |          | 1021  | No | NA | 0 | 1 | Not-determined | Genome-fragment | NA   | 0 |
| 57_extracted_123498      |          | 1106  | No | NA | 0 | 0 | Not-determined | Genome-fragment | NA   | 0 |
| 51_extracted_k141_126162 |          | 2112  | No | NA | 0 | 0 | Low-quality    | Genome-fragment | 2.13 | 0 |
| 57_extracted_123541      |          | 1865  | No | NA | 0 | 1 | Not-determined | Genome-fragment | NA   | 0 |
| 57_extracted_123606      |          | 3219  | No | NA | 0 | 1 | Not-determined | Genome-fragment | NA   | 0 |
| 53_vs_k141_25099         | [full]   | 2112  | No | NA | 0 | 1 | Low-quality    | Genome-fragment | 4.18 | 0 |
| 57_extracted_123815      |          | 4213  | No | NA | 0 | 1 | Not-determined | Genome-fragment | NA   | 0 |
| 57_extracted_123822      |          | 1151  | No | NA | 0 | 1 | Not-determined | Genome-fragment | NA   | 0 |
| 57_extracted_124254      |          | 3940  | No | NA | 0 | 0 | Not-determined | Genome-fragment | NA   | 0 |
| 57_extracted_124412      |          | 4698  | No | NA | 2 | 2 | Not-determined | Genome-fragment | NA   | 0 |
| 53_vs_k141_30155         | [full]   | 2112  | No | NA | 1 | 0 | Low-quality    | Genome-fragment | 5.29 | 0 |
| 57_extracted_124521      |          | 6070  | No | NA | 0 | 6 | Not-determined | Genome-fragment | NA   | 0 |
| 57_extracted_124547      |          | 1015  | No | NA | 0 | 0 | Not-determined | Genome-fragment | NA   | 0 |
| 57_extracted_124602      |          | 1599  | No | NA | 0 | 2 | Not-determined | Genome-fragment | NA   | 0 |
| 57_extracted_124604      |          | 1008  | No | NA | 0 | 1 | Not-determined | Genome-fragment | NA   | 0 |
| 57_extracted_124775      |          | 1444  | No | NA | 0 | 5 | Not-determined | Genome-fragment | NA   | 0 |
| 57_extracted_124807      |          | 2650  | No | NA | 1 | 1 | Not-determined | Genome-fragment | NA   | 0 |
| 57_extracted_124866      |          | 3700  | No | NA | 0 | 2 | Not-determined | Genome-fragment | NA   | 0 |
| 57_extracted_124903      |          | 2240  | No | NA | 1 | 1 | Not-determined | Genome-fragment | NA   | 0 |
| 57_extracted_124917      |          | 2112  | No | NA | 1 | 1 | Low-quality    | Genome-fragment | 0.19 | 0 |
| 57_extracted_124990      |          | 4036  | No | NA | 0 | 2 | Not-determined | Genome-fragment | NA   | 0 |
| 510_vs_34260             | [full]   | 2112  | No | NA | 2 | 0 | Low-quality    | Genome-fragment | 5.4  | 0 |
| 57_extracted_125160      |          | 1504  | No | NA | 1 | 1 | Not-determined | Genome-fragment | NA   | 0 |
| 57_extracted_125166      |          | 3300  | No | NA | 0 | 0 | Not-determined | Genome-fragment | NA   | 0 |
| 57_vs_87443              | [full]   | 2113  | No | NA | 0 | 0 | Low-quality    | Genome-fragment | 3.86 | 0 |
| 57_extracted_125352      |          | 1034  | No | NA | 0 | 1 | Not-determined | Genome-fragment | NA   | 0 |
| 57_vs_91647              | [full]   | 2113  | No | NA | 0 | 0 | Low-quality    | Genome-fragment | 3.16 | 0 |
| 57_extracted_125601      |          | 1150  | No | NA | 0 | 1 | Not-determined | Genome-fragment | NA   | 0 |
| 57_extracted_125677      |          | 1322  | No | NA | 0 | 0 | Not-determined | Genome-fragment | NA   | 0 |
| 57_extracted_125793      |          | 2167  | No | NA | 0 | 1 | Not-determined | Genome-fragment | NA   | 0 |
| 516_vs_155240            | [full]   | 2113  | No | NA | 2 | 0 | Low-quality    | Genome-fragment | 2.57 | 0 |
| 516_vs_167593            | [full]   | 2113  | No | NA | 0 | 0 | Low-quality    | Genome-fragment | 6.13 | 0 |
| 517_vs_k141_8941         | [full]   | 2114  | No | NA | 0 | 2 | Low-quality    | Genome-fragment | 3.34 | 0 |
| 59_vs_k141_64591         | [full]   | 2114  | No | NA | 1 | 0 | Low-quality    | Genome-fragment | 6.1  | 0 |
| 57_extracted_126326      |          | 4102  | No | NA | 0 | 2 | Not-determined | Genome-fragment | NA   | 0 |
| 57_extracted_126369      |          | 1155  | No | NA | 0 | 0 | Not-determined | Genome-fragment | NA   | 0 |
| 55_vs                    |          |       |    |    |   |   |                |                 |      |   |



|                           |        |       |    |    |    |    |                |                 |       |   |
|---------------------------|--------|-------|----|----|----|----|----------------|-----------------|-------|---|
| S12_vs_k141_24236         | full   | 2115  | No | NA | 0  | 0  | Low-quality    | Genome-fragment | 1.43  | 0 |
| S7_extracted_129535       |        | 1169  | No | NA | 0  | 0  | Not-determined | Genome-fragment | NA    | 0 |
| S12_vs_k141_112223        | full   | 2115  | No | NA | 0  | 0  | Low-quality    | Genome-fragment | 1.05  | 0 |
| S7_extracted_129604       |        | 1044  | No | NA | 0  | 0  | Not-determined | Genome-fragment | NA    | 0 |
| S7_extracted_129617       |        | 3214  | No | NA | 0  | 0  | Not-determined | Genome-fragment | NA    | 0 |
| S12_vs_k141_130823        | full   | 2115  | No | NA | 0  | 0  | Low-quality    | Genome-fragment | 1.04  | 0 |
| S6_vs_k141_42395          | full   | 2115  | No | NA | 0  | 1  | Low-quality    | Genome-fragment | 2.11  | 0 |
| S11_vs_k141_65772         | full   | 2116  | No | NA | 2  | 0  | Low-quality    | Genome-fragment | 4.39  | 0 |
| S1_vs_k141_80886          | 102gme | 2116  | No | NA | 1  | 0  | Low-quality    | Genome-fragment | 3.85  | 0 |
| S7_extracted_129806       |        | 1031  | No | NA | 0  | 0  | Not-determined | Genome-fragment | NA    | 0 |
| S3_vs_k141_88607          | full   | 2116  | No | NA | 0  | 0  | Low-quality    | Genome-fragment | 2.77  | 0 |
| S7_extracted_129831       |        | 1018  | No | NA | 0  | 1  | Not-determined | Genome-fragment | NA    | 0 |
| S7_extracted_129887       |        | 7025  | No | NA | 0  | 6  | Not-determined | Genome-fragment | NA    | 0 |
| S7_extracted_130044       |        | 1376  | No | NA | 0  | 1  | Not-determined | Genome-fragment | NA    | 0 |
| S7_extracted_130077       |        | 1307  | No | NA | 0  | 1  | Not-determined | Genome-fragment | NA    | 0 |
| S7_extracted_130181       |        | 3695  | No | NA | 0  | 3  | Not-determined | Genome-fragment | NA    | 0 |
| S5_vs_k141_15121          | full   | 2116  | No | NA | 1  | 0  | Low-quality    | Genome-fragment | 3.49  | 0 |
| S7_extracted_130588       |        | 1130  | No | NA | 0  | 1  | Not-determined | Genome-fragment | NA    | 0 |
| S7_extracted_130616       |        | 20482 | No | NA | 1  | 14 | Not-determined | Genome-fragment | NA    | 0 |
| S7_extracted_130664       |        | 1728  | No | NA | 0  | 0  | Not-determined | Genome-fragment | NA    | 0 |
| S12_extracted_k141_76582  |        | 2116  | No | NA | 1  | 0  | Low-quality    | Genome-fragment | 3.52  | 0 |
| S7_extracted_130723       |        | 1018  | No | NA | 0  | 0  | Not-determined | Genome-fragment | NA    | 0 |
| S15_extracted_56213       |        | 2116  | No | NA | 2  | 0  | Low-quality    | Genome-fragment | 4.89  | 0 |
| S7_extracted_130941       |        | 1106  | No | NA | 0  | 0  | Not-determined | Genome-fragment | NA    | 0 |
| S7_extracted_130945       |        | 1805  | No | NA | 0  | 2  | Not-determined | Genome-fragment | NA    | 0 |
| S7_extracted_131004       |        | 1578  | No | NA | 0  | 0  | Not-determined | Genome-fragment | NA    | 0 |
| S7_extracted_131213       |        | 1279  | No | NA | 0  | 2  | Not-determined | Genome-fragment | NA    | 0 |
| S7_extracted_131247       |        | 10211 | No | NA | 0  | 1  | Not-determined | Genome-fragment | NA    | 0 |
| S7_extracted_131253       |        | 3801  | No | NA | 0  | 2  | Not-determined | Genome-fragment | NA    | 0 |
| S7_extracted_131370       |        | 1076  | No | NA | 0  | 1  | Not-determined | Genome-fragment | NA    | 0 |
| S7_extracted_131664       |        | 1048  | No | NA | 0  | 1  | Not-determined | Genome-fragment | NA    | 0 |
| S7_extracted_131665       |        | 1265  | No | NA | 0  | 1  | Not-determined | Genome-fragment | NA    | 0 |
| S7_extracted_131712       |        | 3467  | No | NA | 0  | 2  | Not-determined | Genome-fragment | NA    | 0 |
| S7_extracted_131962       |        | 3410  | No | NA | 0  | 4  | Not-determined | Genome-fragment | NA    | 0 |
| S7_extracted_132043       |        | 1322  | No | NA | 0  | 1  | Not-determined | Genome-fragment | NA    | 0 |
| S11_vs_k141_27004         | full   | 2117  | No | NA | 0  | 0  | Low-quality    | Genome-fragment | 4.37  | 0 |
| S7_extracted_132317       |        | 1164  | No | NA | 0  | 1  | Not-determined | Genome-fragment | NA    | 0 |
| S7_extracted_132459       |        | 1393  | No | NA | 0  | 0  | Not-determined | Genome-fragment | NA    | 0 |
| S7_extracted_132475       |        | 3967  | No | NA | 0  | 0  | Not-determined | Genome-fragment | NA    | 0 |
| S10_vs_114417             | full   | 2117  | No | NA | 0  | 0  | Low-quality    | Genome-fragment | 5.65  | 0 |
| S7_extracted_132548       |        | 1657  | No | NA | 0  | 0  | Not-determined | Genome-fragment | NA    | 0 |
| S7_extracted_132562       |        | 7865  | No | NA | 0  | 0  | Not-determined | Genome-fragment | NA    | 0 |
| S7_extracted_132615       |        | 1888  | No | NA | 0  | 1  | Not-determined | Genome-fragment | NA    | 0 |
| S15_extracted_51548       |        | 2117  | No | NA | 0  | 0  | Low-quality    | Genome-fragment | 6.12  | 0 |
| S6_extracted_k141_48593   |        | 2117  | No | NA | 0  | 1  | Low-quality    | Genome-fragment | 1.04  | 0 |
| S6_vs_k141_16110          | full   | 2117  | No | NA | 0  | 0  | Low-quality    | Genome-fragment | 3.49  | 0 |
| S8_vs_k141_142542         | full   | 2117  | No | NA | 0  | 2  | Low-quality    | Genome-fragment | 0.61  | 0 |
| S7_extracted_132968       |        | 2483  | No | NA | 0  | 1  | Not-determined | Genome-fragment | NA    | 0 |
| S7_extracted_133089       |        | 1002  | No | NA | 0  | 1  | Not-determined | Genome-fragment | NA    | 0 |
| S1_extracted_k141_50555   |        | 2118  | No | NA | 2  | 0  | Low-quality    | Genome-fragment | 6.1   | 0 |
| S3_vs_k141_33118          | full   | 2118  | No | NA | 3  | 0  | Low-quality    | Genome-fragment | 5.19  | 0 |
| S7_extracted_133156       |        | 1266  | No | NA | 2  | 2  | Not-determined | Genome-fragment | NA    | 0 |
| S7_extracted_133205       |        | 5594  | No | NA | 0  | 4  | Not-determined | Genome-fragment | NA    | 0 |
| S7_extracted_133347       |        | 4876  | No | NA | 0  | 3  | Not-determined | Genome-fragment | NA    | 0 |
| S7_extracted_133362       |        | 1443  | No | NA | 0  | 2  | Not-determined | Genome-fragment | NA    | 0 |
| S7_extracted_133463       |        | 3650  | No | NA | 0  | 3  | Not-determined | Genome-fragment | NA    | 0 |
| S7_extracted_133516       |        | 1487  | No | NA | 0  | 1  | Not-determined | Genome-fragment | NA    | 0 |
| S7_extracted_133554       |        | 1398  | No | NA | 0  | 1  | Not-determined | Genome-fragment | NA    | 0 |
| S7_vs_125655              | full   | 2118  | No | NA | 0  | 0  | Low-quality    | Genome-fragment | 4.5   | 0 |
| S7_extracted_133577       |        | 1682  | No | NA | 0  | 1  | Not-determined | Genome-fragment | NA    | 0 |
| S7_extracted_133722       |        | 1063  | No | NA | 0  | 1  | Not-determined | Genome-fragment | NA    | 0 |
| S7_extracted_133746       |        | 2573  | No | NA | 0  | 1  | Not-determined | Genome-fragment | NA    | 0 |
| S7_extracted_133761       |        | 1752  | No | NA | 0  | 0  | Not-determined | Genome-fragment | NA    | 0 |
| S7_extracted_133849       |        | 3044  | No | NA | 0  | 1  | Not-determined | Genome-fragment | NA    | 0 |
| S7_extracted_133861       |        | 3491  | No | NA | 0  | 1  | Not-determined | Genome-fragment | NA    | 0 |
| S7_extracted_134014       |        | 1115  | No | NA | 0  | 0  | Not-determined | Genome-fragment | NA    | 0 |
| S7_extracted_134023       |        | 41645 | No | NA | 16 | 1  | Complete       | High-quality    | 100   | 0 |
| S7_extracted_134061       |        | 4591  | No | NA | 0  | 0  | Not-determined | Genome-fragment | NA    | 0 |
| S7_extracted_134201       |        | 1010  | No | NA | 0  | 0  | Not-determined | Genome-fragment | NA    | 0 |
| S3_extracted_k141_102443  |        | 2119  | No | NA | 1  | 0  | Low-quality    | Genome-fragment | 3.38  | 0 |
| S10_vs_40791              | full   | 2119  | No | NA | 0  | 0  | Low-quality    | Genome-fragment | 4.56  | 0 |
| S7_extracted_134434       |        | 1613  | No | NA | 0  | 0  | Not-determined | Genome-fragment | NA    | 0 |
| S10_vs_50917              | full   | 2119  | No | NA | 2  | 0  | Low-quality    | Genome-fragment | 3.87  | 0 |
| S7_extracted_134488       |        | 1193  | No | NA | 0  | 1  | Not-determined | Genome-fragment | NA    | 0 |
| S7_extracted_134528       |        | 1342  | No | NA | 0  | 1  | Not-determined | Genome-fragment | NA    | 0 |
| S10_vs_104380             | full   | 2119  | No | NA | 1  | 0  | Low-quality    | Genome-fragment | 38.84 | 0 |
| S7_extracted_134718       |        | 1366  | No | NA | 0  | 1  | Not-determined | Genome-fragment | NA    | 0 |
| S7_extracted_134793       |        | 3493  | No | NA | 0  | 3  | Not-determined | Genome-fragment | NA    | 0 |
| S7_extracted_134850       |        | 1157  | No | NA | 0  | 0  | Not-determined | Genome-fragment | NA    | 0 |
| S7_extracted_134876       |        | 1011  | No | NA | 0  | 0  | Not-determined | Genome-fragment | NA    | 0 |
| S8_vs_k141_168147         | full   | 2119  | No | NA | 0  | 0  | Low-quality    | Genome-fragment | 4.91  | 0 |
| S7_extracted_135056       |        | 2411  | No | NA | 0  | 1  | Not-determined | Genome-fragment | NA    | 0 |
| S7_extracted_135081       |        | 1978  | No | NA | 0  | 0  | Not-determined | Genome-fragment | NA    | 0 |
| S7_extracted_135084       |        | 1455  | No | NA | 0  | 0  | Not-determined | Genome-fragment | NA    | 0 |
| S7_extracted_135183       |        | 1386  | No | NA | 0  | 1  | Not-determined | Genome-fragment | NA    | 0 |
| S7_extracted_135197       |        | 2087  | No | NA | 0  | 1  | Not-determined | Genome-fragment | NA    | 0 |
| S7_extracted_135462       |        | 2305  | No | NA | 0  | 0  | Not-determined | Genome-fragment | NA    | 0 |
| S11_extracted_k141_21016  |        | 2120  | No | NA | 1  | 0  | Low-quality    | Genome-fragment | 1.32  | 0 |
| S7_extracted_135520       |        | 4563  | No | NA | 0  | 2  | Not-determined | Genome-fragment | NA    | 0 |
| S7_extracted_135572       |        | 1132  | No | NA | 0  | 0  | Not-determined | Genome-fragment | NA    | 0 |
| S7_extracted_135580       |        | 1115  | No | NA | 0  | 0  | Not-determined | Genome-fragment | NA    | 0 |
| S14_vs_k141_110161        | full   | 2120  | No | NA | 0  | 0  | Low-quality    | Genome-fragment | 4.25  | 0 |
| S7_extracted_135778       |        | 14133 | No | NA | 6  | 1  | Complete       | High-quality    | 100   | 0 |
| S1_vs_k141_88745          | full   | 2120  | No | NA | 1  | 0  | Low-quality    | Genome-fragment | 5.04  | 0 |
| S7_extracted_135980       |        | 2692  | No | NA | 1  | 2  | Not-determined | Genome-fragment | NA    | 0 |
| S7_vs_13059               | full   | 2120  | No | NA | 2  | 1  | Low-quality    | Genome-fragment | 3.69  | 0 |
| S7_extracted_136152       |        | 3889  | No | NA | 0  | 1  | Not-determined | Genome-fragment | NA    | 0 |
| S7_extracted_136199       |        | 3115  | No | NA | 0  | 1  | Not-determined | Genome-fragment | NA    | 0 |
| S2_vs_k141_124119         | full   | 2120  | No | NA | 0  | 0  | Low-quality    | Genome-fragment | 3.55  | 0 |
| S7_extracted_136348       |        | 1136  | No | NA | 0  | 0  | Not-determined | Genome-fragment | NA    | 0 |
| S7_extracted_136362       |        | 3110  | No | NA | 0  | 1  | Not-determined | Genome-fragment | NA    | 0 |
| S7_extracted_136427       |        | 1097  | No | NA | 0  | 1  | Not-determined | Genome-fragment | NA    | 0 |
| S7_extracted_136544       |        | 1213  | No | NA | 0  | 1  | Not-determined | Genome-fragment | NA    | 0 |
| S7_extracted_136632       |        | 2268  | No | NA | 0  | 0  | Not-determined | Genome-fragment | NA    | 0 |
| S7_extracted_136837       |        | 1183  | No | NA | 0  | 0  | Not-determined | Genome-fragment | NA    | 0 |
| S7_extracted_136858       |        | 1295  | No | NA | 0  | 0  | Not-determined | Genome-fragment | NA    | 0 |
| S7_extracted_137206       |        | 3419  | No | NA | 0  | 2  | Not-determined | Genome-fragment | NA    | 0 |
| S8_vs_k141_129979         | full   | 2120  | No | NA | 0  | 0  | Low-quality    | Genome-fragment | 2.89  | 0 |
| S5_extracted_k141_1315558 |        | 2121  | No | NA | 0  | 0  | Low-quality    | Genome-fragment | 1.82  | 0 |
| S7_extracted_137599       |        | 2187  | No | NA | 0  | 1  | Not-determined | Genome-fragment | NA    | 0 |
| S7_vs_96214               | full   | 2121  | No | NA | 2  | 0  | Low-quality    | Genome-fragment | 5.32  | 0 |
| S7_extracted_137726       |        | 1097  | No | NA | 0  | 0  | Not-determined | Genome-fragment | NA    | 0 |
| S7_extracted_137744       |        | 1294  | No | NA | 0  | 1  | Not-determined | Genome-fragment | NA    | 0 |
| S7_extracted_137797       |        | 1170  | No | NA | 0  | 0  | Not-determined | Genome-fragment | NA    | 0 |
| S10_vs_17293              | full   | 2121  | No | NA | 0  | 0  | Low-quality    | Genome-fragment | 1.61  | 0 |
| S12_vs_k141_33431         | full   | 2121  | No | NA | 0  | 1  | Low-quality    | Genome-fragment | 1.88  | 0 |
| S7_extracted_137977       |        | 1113  | No | NA | 0  | 1  | Not-determined | Genome-fragment | NA    | 0 |
| S7_extracted_138019       |        | 10319 | No | NA | 0  | 0  | Medium-quality | Genome-fragment | 76.65 | 0 |
| S7_extracted_138045       |        | 3411  | No | NA | 0  | 2  | Not-determined | Genome-fragment | NA    | 0 |
| S7_extracted_138069       |        | 59463 | No | NA | 17 | 0  | Complete       | High-quality    | 100   | 0 |
| S7_extracted_138106       |        | 1408  | No | NA | 0  | 1  | Not-determined | Genome-fragment | NA    | 0 |
| S7_extracted_138114       |        | 1013  | No | NA | 0  | 1  | Not-determined | Genome-fragment | NA    | 0 |
| S7_extracted_138143       |        | 1276  | No | NA | 0  | 0  | Not-determined | Genome-fragment | NA    | 0 |
| S7_extracted_138149       |        | 1131  | No | NA | 0  | 1  | Not-determined | Genome-fragment | NA    | 0 |
| S7_extracted_138201       |        | 6278  | No | NA | 0  | 2  | Not-determined | Genome-fragment | NA    | 0 |
| S17_vs_k141_100573        | full   | 2122  | No | NA | 0  | 1  | Low-quality    | Genome-fragment | 2.31  | 0 |
| S7_extracted_138225       |        | 40099 | No | NA | 19 | 0  | Complete       | High-quality    | 100   | 0 |
| S7_extracted_138237       |        | 5056  | No | NA | 0  | 0  | Not-determined | Genome-fragment | NA    | 0 |
| S7_extracted_138246       |        | 1902  | No | NA | 0  | 0  | Not-determined | Genome-fragment | NA    | 0 |
| S7_vs_557                 | full   | 37167 | No | NA | 10 | 1  | High-quality   | High-quality    | 93.88 | 0 |
| S7_vs_2599                | full   | 46176 | No | NA | 6  | 2  | High-quality   | High-quality    | 100   | 0 |
| S7_vs_2692                | full   | 5934  | No | NA | 0  | 2  | Not-determined | Genome-fragment | NA    | 0 |
| S7_vs_4956                | full   | 44351 | No | NA | 17 | 1  | High-quality   | High-quality    | 98.81 | 0 |
| S7_vs_5236                | full   | 32721 | No | NA | 17 | 1  | High-quality   | High-quality    | 100   | 0 |
| S13_vs_45909              | full   | 2122  | No | NA | 0  | 1  | Low-quality    | Genome-fragment | 0.98  | 0 |
| S7_vs_27530               | full   | 41445 | No | NA | 15 | 2  | High-quality   | High-quality    | 98.98 | 0 |
| S7_vs_36656               | full   | 41765 | No | NA | 32 | 2  | Medium-quality | Genome-fragment | 85.59 | 0 |
| S7_vs_42561               | full   | 17814 | No | NA | 4  | 1  | High-quality   | High-quality    | 98.7  | 0 |
| S7_vs_54322               | full   | 56805 | No | NA | 13 | 2  | High-quality   | High-quality    | 100   | 0 |
| S7_vs_60775               | full   | 36609 | No | NA | 23 | 0  | High-quality   | High-quality    | 96.77 | 0 |
| S7_vs_65719               | full   | 40735 | No | NA | 17 | 1  | Medium-quality | Genome-fragment | 76.86 | 0 |
| S7_vs_75613               | full   | 7686  | No | NA | 0  | 0  | Not-determined | Genome-fragment | NA    | 0 |
| S13_vs_66243              | full   | 2122  | No | NA | 1  | 0  | Low-quality    |                 |       |   |



|                              |       |     |    |    |   |                |                 |       |       |
|------------------------------|-------|-----|----|----|---|----------------|-----------------|-------|-------|
| S10_extracted_22083          | 2122  | No  | NA | 0  | 3 | Low-quality    | Genome-fragment | 1.65  | 0     |
| S10_vs_30560  full           | 2122  | No  | NA | 0  | 1 | Low-quality    | Genome-fragment | 1.73  | 0     |
| S8_extracted_k141_48051      | 2122  | No  | NA | 0  | 0 | Low-quality    | Genome-fragment | 0.39  | 0     |
| S9_vs_k141_51223  full       | 2123  | No  | NA | 0  | 0 | Low-quality    | Genome-fragment | 5.39  | 0     |
| S13_extracted_119923         | 2123  | No  | NA | 0  | 2 | Low-quality    | Genome-fragment | 4.24  | 0     |
| S16_vs_56700  full           | 2123  | No  | NA | 1  | 0 | Low-quality    | Genome-fragment | 2.15  | 0     |
| S7_vs_944  full              | 2257  | No  | NA | 13 | 0 | Medium-quality | Genome-fragment | 57.89 | 0     |
| S10_vs_83731  full           | 2123  | No  | NA | 0  | 1 | Low-quality    | Genome-fragment | 7.15  | 0     |
| S12_vs_k141_2649  full       | 2123  | No  | NA | 0  | 0 | Low-quality    | Genome-fragment | 4.89  | 0     |
| S17_extracted_k141_102519    | 2124  | No  | NA | 0  | 0 | Low-quality    | Genome-fragment | 1.44  | 0     |
| S14_vs_k141_63952  full      | 2124  | No  | NA | 0  | 1 | Low-quality    | Genome-fragment | 4.96  | 0     |
| S5_vs_k141_130256  full      | 2124  | No  | NA | 0  | 1 | Low-quality    | Genome-fragment | 1.25  | 0     |
| S7_extracted_22423           | 2124  | No  | NA | 0  | 2 | Low-quality    | Genome-fragment | 4.1   | 0     |
| S16_vs_146544  full          | 2124  | No  | NA | 1  | 0 | Low-quality    | Genome-fragment | 3.35  | 0     |
| S8_extracted_k141_116220     | 2124  | No  | NA | 1  | 0 | Low-quality    | Genome-fragment | 6.75  | 0     |
| S7_vs_1777  full             | 1728  | No  | NA | 0  | 3 | Not-determined | Genome-fragment | NA    | 0     |
| S11_vs_k141_67259  full      | 2125  | No  | NA | 0  | 0 | Low-quality    | Genome-fragment | 4.14  | 0     |
| S5_extracted_k141_26258      | 2125  | No  | NA | 4  | 0 | Low-quality    | Genome-fragment | 6.16  | 0     |
| S7_vs_1507  full             | 7939  | No  | NA | 0  | 6 | Not-determined | Genome-fragment | NA    | 0     |
| S7_vs_103838  full           | 2125  | No  | NA | 1  | 0 | Low-quality    | Genome-fragment | 4.28  | 0     |
| S8_extracted_k141_135243     | 2125  | No  | NA | 0  | 2 | Low-quality    | Genome-fragment | 4.26  | 0     |
| S2_extracted_k141_13197      | 2126  | No  | NA | 2  | 0 | Low-quality    | Genome-fragment | 2.07  | 0     |
| S7_vs_2406  full             | 7399  | No  | NA | 0  | 6 | Not-determined | Genome-fragment | NA    | 0     |
| S7_vs_2456  full             | 1044  | No  | NA | 0  | 0 | Not-determined | Genome-fragment | NA    | 0     |
| S7_vs_2490  full             | 1399  | No  | NA | 0  | 1 | Not-determined | Genome-fragment | NA    | 0     |
| S7_vs_2589  full             | 2780  | No  | NA | 0  | 3 | Not-determined | Genome-fragment | NA    | 0     |
| S7_vs_2632  full             | 1470  | No  | NA | 0  | 1 | Not-determined | Genome-fragment | NA    | 0     |
| S8_extracted_k141_16282      | 2126  | No  | NA | 1  | 0 | Low-quality    | Genome-fragment | 5.42  | 0     |
| S8_vs_k141_41036  full       | 2126  | No  | NA | 0  | 0 | Low-quality    | Genome-fragment | 3.51  | 0     |
| S9_vs_k141_5350  full        | 2127  | No  | NA | 3  | 0 | Low-quality    | Genome-fragment | 5.63  | 0     |
| S14_vs_k141_92323  full      | 2127  | No  | NA | 1  | 0 | Low-quality    | Genome-fragment | 5     | 0     |
| S3_extracted_k141_24878      | 2127  | No  | NA | 1  | 0 | Low-quality    | Genome-fragment | 7.29  | 0     |
| S3_extracted_k141_81809      | 2127  | No  | NA | 1  | 0 | Low-quality    | Genome-fragment | 7.29  | 0     |
| S7_vs_78828  full            | 2127  | No  | NA | 0  | 0 | Low-quality    | Genome-fragment | 4.06  | 0     |
| S7_vs_2830  full             | 1461  | No  | NA | 0  | 1 | Not-determined | Genome-fragment | NA    | 0     |
| S7_vs_2938  full             | 1844  | No  | NA | 0  | 1 | Not-determined | Genome-fragment | NA    | 0     |
| S12_extracted_k141_57887     | 2127  | No  | NA | 0  | 0 | Low-quality    | Genome-fragment | 3.69  | 0     |
| S12_vs_k141_128099  full     | 2127  | No  | NA | 0  | 2 | Low-quality    | Genome-fragment | 1.28  | 0     |
| S12_vs_k141_97489  full      | 2127  | No  | NA | 0  | 0 | Low-quality    | Genome-fragment | 5.86  | 0     |
| S2_extracted_k141_15227      | 2127  | No  | NA | 0  | 1 | Low-quality    | Genome-fragment | 1.59  | 0     |
| S6_vs_k141_78  full          | 2127  | No  | NA | 0  | 2 | Low-quality    | Genome-fragment | 2.26  | 0     |
| S7_vs_3209  full             | 1682  | No  | NA | 0  | 2 | Not-determined | Genome-fragment | NA    | 0     |
| S8_extracted_k141_87935      | 2127  | No  | NA | 0  | 1 | Low-quality    | Genome-fragment | 6.79  | 0     |
| S7_vs_3287  full             | 3041  | No  | NA | 0  | 4 | Not-determined | Genome-fragment | NA    | 0     |
| S7_vs_3391  full             | 5284  | No  | NA | 0  | 2 | Not-determined | Genome-fragment | NA    | 0     |
| S7_vs_3425  full             | 1269  | No  | NA | 0  | 2 | Not-determined | Genome-fragment | NA    | 0     |
| S8_vs_k141_41303  full       | 2127  | No  | NA | 0  | 0 | Low-quality    | Genome-fragment | 4.63  | 0     |
| S7_vs_3685  full             | 2913  | No  | NA | 0  | 2 | Not-determined | Genome-fragment | NA    | 0     |
| S11_vs_k141_23162  full      | 2128  | No  | NA | 0  | 0 | Low-quality    | Genome-fragment | 5.91  | 0     |
| S7_vs_3729  full             | 1398  | No  | NA | 0  | 0 | Not-determined | Genome-fragment | NA    | 0     |
| S5_vs_k141_10485  full       | 2128  | No  | NA | 0  | 0 | Low-quality    | Genome-fragment | 5.13  | 0     |
| S7_vs_3797  full             | 4509  | No  | NA | 0  | 2 | Not-determined | Genome-fragment | NA    | 0     |
| S7_vs_97785  full            | 2128  | No  | NA | 0  | 2 | Low-quality    | Genome-fragment | 0.93  | 0     |
| S7_vs_3952  full             | 2128  | No  | NA | 0  | 1 | Not-determined | Genome-fragment | NA    | 0     |
| S10_vs_103550  full          | 2128  | No  | NA | 0  | 0 | Low-quality    | Genome-fragment | 2.51  | 0     |
| S7_vs_k14141                 | 38600 | No  | NA | 11 | 1 | Medium-quality | Genome-fragment | 87.94 | 0     |
| S7_vs_4129  full             | 4192  | No  | NA | 0  | 0 | Not-determined | Genome-fragment | NA    | 0     |
| S7_vs_4158  full             | 3241  | No  | NA | 0  | 1 | Not-determined | Genome-fragment | NA    | 0     |
| S7_vs_4164  full             | 4276  | No  | NA | 0  | 4 | Not-determined | Genome-fragment | NA    | 0     |
| S7_vs_4165  full             | 2644  | No  | NA | 0  | 1 | Not-determined | Genome-fragment | NA    | 0     |
| S7_vs_4189  full             | 4577  | No  | NA | 0  | 2 | Not-determined | Genome-fragment | NA    | 0     |
| S7_vs_4200  full             | 1194  | No  | NA | 0  | 0 | Not-determined | Genome-fragment | NA    | 0     |
| S17_vs_k141_163922  full     | 2129  | No  | NA | 0  | 0 | Low-quality    | Genome-fragment | 5.32  | 0     |
| S17_vs_k141_167283  full     | 2129  | No  | NA | 1  | 0 | Low-quality    | Genome-fragment | 2.39  | 0     |
| S1_extracted_k141_47536      | 2129  | No  | NA | 0  | 0 | Low-quality    | Genome-fragment | 1.21  | 0     |
| S7_vs_4412  full             | 1251  | No  | NA | 0  | 2 | Not-determined | Genome-fragment | NA    | 0     |
| S3_vs_k141_122639  full      | 2129  | No  | NA | 0  | 0 | Low-quality    | Genome-fragment | 5.96  | 0     |
| S17_vs_k141_96433  full      | 2130  | No  | NA | 0  | 1 | Low-quality    | Genome-fragment | 1.23  | 0     |
| S14_vs_k141_6985  H2gme      | 2130  | No  | NA | 0  | 0 | Low-quality    | Genome-fragment | 5.42  | 0     |
| S7_vs_4556  full             | 3163  | No  | NA | 0  | 3 | Not-determined | Genome-fragment | NA    | 0     |
| S7_vs_4564  full             | 2940  | No  | NA | 0  | 3 | Not-determined | Genome-fragment | NA    | 0     |
| S7_vs_37190  full            | 2130  | No  | NA | 0  | 1 | Low-quality    | Genome-fragment | 4.63  | 0     |
| S7_vs_4709  full             | 1562  | No  | NA | 0  | 0 | Not-determined | Genome-fragment | NA    | 0     |
| S7_vs_56616  full            | 2130  | No  | NA | 0  | 2 | Low-quality    | Genome-fragment | 3.94  | 0     |
| S7_vs_4745  full             | 2220  | No  | NA | 0  | 0 | Not-determined | Genome-fragment | NA    | 0     |
| S7_vs_70498  full            | 2130  | No  | NA | 0  | 1 | Low-quality    | Genome-fragment | 2.36  | 0     |
| S16_vs_43159  full           | 2130  | No  | NA | 1  | 0 | Low-quality    | Genome-fragment | 1.91  | 0     |
| S7_vs_4941  full             | 2095  | No  | NA | 0  | 0 | Not-determined | Genome-fragment | NA    | 0     |
| S16_vs_83259  full           | 2130  | No  | NA | 0  | 0 | Low-quality    | Genome-fragment | 5.1   | 0     |
| S7_vs_4982  full             | 4288  | No  | NA | 0  | 9 | Not-determined | Genome-fragment | NA    | 0     |
| S4_extracted_21584           | 2130  | No  | NA | 0  | 0 | Low-quality    | Genome-fragment | 3.21  | 0     |
| S14_vs_k141_62068  full      | 2131  | No  | NA | 0  | 0 | Low-quality    | Genome-fragment | 3.24  | 0     |
| S5_vs_k141_39809  H2gme      | 2131  | No  | NA | 1  | 0 | Low-quality    | Genome-fragment | 5.33  | 0     |
| S17_vs_k141_158961  full     | 2132  | No  | NA | 0  | 0 | Low-quality    | Genome-fragment | 3.52  | 0     |
| S5_vs_k141_101018  H2gme     | 2132  | No  | NA | 0  | 0 | Low-quality    | Genome-fragment | 4.88  | 0     |
| S7_vs_75368  full            | 2132  | No  | NA | 0  | 0 | Low-quality    | Genome-fragment | 1.51  | 0     |
| S7_vs_5283  full             | 4401  | No  | NA | 0  | 4 | Not-determined | Genome-fragment | NA    | 0     |
| S4_vs_VirusSorter_5973-cat_2 | 2132  | No  | NA | 0  | 0 | Low-quality    | Genome-fragment | 4.47  | 0     |
| S11_extracted_k141_6326      | 2133  | No  | NA | 0  | 0 | Low-quality    | Genome-fragment | 3.68  | 0     |
| S13_vs_80584  full           | 2133  | No  | NA | 0  | 1 | Low-quality    | Genome-fragment | 1.08  | 0     |
| S3_extracted_k141_3348       | 2133  | No  | NA | 1  | 0 | Low-quality    | Genome-fragment | 5.27  | 0     |
| S3_vs_k141_92367  full       | 2133  | No  | NA | 0  | 0 | Low-quality    | Genome-fragment | 3.57  | 0     |
| S7_vs_43023  full            | 2133  | No  | NA | 2  | 0 | Low-quality    | Genome-fragment | 4.81  | 0     |
| S12_vs_k141_142295  full     | 2133  | No  | NA | 1  | 0 | Low-quality    | Genome-fragment | 0.74  | 0     |
| S6_vs_k141_1586  full        | 2133  | No  | NA | 0  | 2 | Low-quality    | Genome-fragment | 1.26  | 0     |
| S7_vs_5708  full             | 1871  | No  | NA | 0  | 0 | Not-determined | Genome-fragment | NA    | 0     |
| S11_vs_k141_100964  full     | 2134  | No  | NA | 0  | 2 | Low-quality    | Genome-fragment | 1.29  | 0     |
| S14_vs_k141_68303  H2gme     | 2134  | No  | NA | 2  | 0 | Low-quality    | Genome-fragment | 5.49  | 0     |
| S5_vs_k141_76444  H2gme      | 2134  | No  | NA | 0  | 0 | Low-quality    | Genome-fragment | 4.58  | 0     |
| S7_vs_5850  full             | 1941  | No  | NA | 0  | 1 | Not-determined | Genome-fragment | NA    | 0     |
| S16_extracted_94422          | 2134  | No  | NA | 1  | 0 | Low-quality    | Genome-fragment | 3.43  | 0     |
| S7_vs_5930  full             | 1806  | No  | NA | 0  | 0 | Not-determined | Genome-fragment | NA    | 0     |
| S10_vs_56043  full           | 2134  | No  | NA | 2  | 0 | Low-quality    | Genome-fragment | 1.21  | 0     |
| S7_vs_6298  full             | 4798  | No  | NA | 0  | 3 | Not-determined | Genome-fragment | NA    | 0     |
| S7_vs_6334  full             | 3241  | No  | NA | 0  | 3 | Not-determined | Genome-fragment | NA    | 0     |
| S7_vs_6428  full             | 1067  | No  | NA | 0  | 0 | Not-determined | Genome-fragment | NA    | 0     |
| S12_vs_k141_125663  full     | 2134  | No  | NA | 0  | 0 | Low-quality    | Genome-fragment | 5.82  | 0     |
| S7_vs_6626  full             | 61993 | No  | NA | 21 | 1 | High-quality   | High-quality    | 100   | 0     |
| S7_vs_6638  full             | 1336  | No  | NA | 0  | 0 | Not-determined | Genome-fragment | NA    | 0     |
| S1_vs_k141_149048  full      | 2135  | No  | NA | 0  | 0 | Low-quality    | Genome-fragment | 2.9   | 0     |
| S7_vs_113279  H2gme          | 2135  | No  | NA | 1  | 0 | Low-quality    | Genome-fragment | 1.41  | 0     |
| S16_vs_130379  full          | 2135  | No  | NA | 0  | 0 | Low-quality    | Genome-fragment | 1.62  | 0     |
| S4_extracted_4120            | 2135  | No  | NA | 1  | 0 | Low-quality    | Genome-fragment | 5.27  | 0     |
| S8_extracted_k141_108521     | 2135  | No  | NA | 0  | 1 | Low-quality    | Genome-fragment | 2.09  | 0     |
| S8_vs_k141_56802  full       | 2135  | No  | NA | 0  | 0 | Low-quality    | Genome-fragment | 1.13  | 0     |
| S11_extracted_k141_98456     | 2136  | No  | NA | 1  | 0 | Low-quality    | Genome-fragment | 4.66  | 0     |
| S7_vs_7038  full             | 2210  | No  | NA | 0  | 1 | Not-determined | Genome-fragment | NA    | 0     |
| S11_extracted_k141_100933    | 2136  | No  | NA | 2  | 0 | Low-quality    | Genome-fragment | 1.72  | 0     |
| S7_vs_7135  full             | 2095  | No  | NA | 0  | 2 | Not-determined | Genome-fragment | NA    | 0     |
| S7_vs_7202  full             | 1513  | No  | NA | 0  | 1 | Not-determined | Genome-fragment | NA    | 0     |
| S1_vs_k141_136772  full      | 2136  | No  | NA | 1  | 0 | Low-quality    | Genome-fragment | 4.67  | 0     |
| S3_vs_k141_15670  full       | 2136  | No  | NA | 0  | 2 | Low-quality    | Genome-fragment | 4.99  | 0     |
| S7_vs_7331  full             | 1868  | No  | NA | 0  | 3 | Not-determined | Genome-fragment | NA    | 0     |
| S7_vs_7378  full             | 1844  | No  | NA | 0  | 0 | Not-determined | Genome-fragment | NA    | 0     |
| S7_vs_7761  full             | 20219 | No  | NA | 0  | 4 | Not-determined | Genome-fragment | NA    | 0     |
| S7_vs_7944  full             | 3335  | No  | NA | 0  | 2 | Not-determined | Genome-fragment | NA    | 0     |
| S5_extracted_k141_133075     | 2136  | Yes | NA | 1  | 1 | Low-quality    | Genome-fragment | 2.05  | 65.82 |
| S12_extracted_k141_151475    | 2136  | No  | NA | 0  | 0 | Low-quality    | Genome-fragment | 3.77  | 0     |
| S7_vs_8084  full             | 1284  | No  | NA | 0  | 1 | Not-determined | Genome-fragment | NA    | 0     |
| S9_vs_k141_69592  full       | 2137  | No  | NA | 2  | 0 | Low-quality    | Genome-fragment | 4.69  | 0     |
| S7_vs_8121  full             | 1043  | No  | NA | 0  | 1 | Not-determined | Genome-fragment | NA    | 0     |
| S7_vs_8130  full             | 1521  | No  | NA | 0  | 0 | Not-determined | Genome-fragment | NA    | 0     |
| S14_extracted_k141_30300     | 2137  | No  | NA | 6  | 0 | Low-quality    | Genome-fragment | 7.05  | 0     |
| S5_vs_k141_138876  full      | 2137  | No  | NA | 2  | 0 | Low-quality    | Genome-fragment | 5.93  | 0     |
| S5_vs_k141_197411  full      | 2138  | No  | NA | 2  | 0 | Low-quality    | Genome-fragment | 5.28  | 0     |
| S7_vs_8292  full             | 1660  | No  | NA | 0  | 2 | Not-determined | Genome-fragment | NA    | 0     |
| S5_vs_k141_16624  full       | 2138  | No  | NA | 3  | 0 | Low-quality    | Genome-fragment | 5.46  | 0     |
| S7_vs_8413  full             | 1756  | No  | NA | 0  | 1 | Not-determined | Genome-fragment | NA    | 0     |
| S7_vs_8453  full             | 1455  | No  | NA | 0  | 0 | Not-determined | Genome-fragment | NA    | 0     |
| S10_extracted_6273           | 2138  | No  | NA | 1  | 0 | Low-quality    | Genome-fragment | 4.72  | 0     |
| S7_vs_8507  full             | 3475  | No  | NA | 0  | 0 | Not-determined | Genome-fragment | NA    | 0     |
| S8_vs_k141_1238  full        | 2138  | No  | NA | 0  | 0 | Low-quality    | Genome-fragment | 6.41  | 0     |
| S14_vs_k141_108359  H2gme    | 2139  | No  | NA | 1  | 0 | Low-quality    | Genome-fragment | 3.97  | 0     |
| S7_vs_8632  full             | 2800  | No  | NA | 0  | 0 | Not-determined | Genome-fragment | NA    | 0     |
| S7_vs_8697  full             | 1203  | No  | NA | 0  | 0 | Not-determined | Genome-fragment | NA    | 0     |
| S5_vs_k141_105444  full      | 2139  | No  | NA | 2  | 0 | Low-quality    | Genome-fragment | 3.33  | 0     |
| S7_vs_8892  full             | 3502  | No  | NA | 0  | 1 | Not-determined | Genome-fragment | NA    | 0     |
| S7_vs_59006  full            |       |     |    |    |   |                |                 |       |       |



|                           |        |       |     |    |    |    |                |                 |    |       |       |
|---------------------------|--------|-------|-----|----|----|----|----------------|-----------------|----|-------|-------|
| 57_vs_10832               | [full] | 2430  | No  | NA | 0  | 0  | Not-determined | Genome-fragment | NA | 5.53  | 0     |
| 58_vs_k141_201841         | [full] | 2142  | No  | NA | 0  | 0  | Low-quality    | Genome-fragment | NA | 5.2   | 0     |
| 55_vs_k141_42811          | [full] | 2143  | No  | NA | 2  | 0  | Low-quality    | Genome-fragment | NA | 4.94  | 0     |
| 57_vs_10986               | [full] | 2427  | No  | NA | 0  | 0  | Not-determined | Genome-fragment | NA | 100   | 0     |
| 57_vs_11014               | [full] | 1260  | No  | NA | 0  | 0  | Not-determined | Genome-fragment | NA | 2.47  | 0     |
| 512_extracted_k141_33221  |        | 2143  | No  | NA | 1  | 0  | Low-quality    | Genome-fragment | NA | 3.95  | 0     |
| 57_vs_11081               | [full] | 57891 | No  | NA | 8  | 3  | High-quality   | Genome-fragment | NA | 4.25  | 0     |
| 57_vs_11138               | [full] | 5152  | No  | NA | 0  | 2  | Not-determined | Genome-fragment | NA | 4.78  | 0     |
| 515_extracted_17626       |        | 2143  | No  | NA | 0  | 0  | Low-quality    | Genome-fragment | NA | 4.47  | 0     |
| 57_vs_11314               | [full] | 1988  | No  | NA | 0  | 0  | Not-determined | Genome-fragment | NA | 0.66  | 0     |
| 511_vs_k141_18011         | [full] | 2144  | No  | NA | 0  | 1  | Low-quality    | Genome-fragment | NA | 3.28  | 0     |
| 514_vs_k141_44175         | [full] | 2144  | No  | NA | 0  | 0  | Low-quality    | Genome-fragment | NA | 4     | 0     |
| 57_vs_11593               | [full] | 2453  | No  | NA | 0  | 2  | Not-determined | Genome-fragment | NA | 3.73  | 0     |
| 55_vs_k141_82956          | [full] | 2144  | No  | NA | 1  | 0  | Low-quality    | Genome-fragment | NA | 3.95  | 0     |
| 57_vs_11668               | [full] | 1440  | No  | NA | 0  | 0  | Not-determined | Genome-fragment | NA | 4.25  | 0     |
| 57_vs_12666               | [full] | 2144  | No  | NA | 0  | 1  | Low-quality    | Genome-fragment | NA | 4.78  | 0     |
| 57_vs_136759              | [full] | 2144  | No  | NA | 1  | 0  | Low-quality    | Genome-fragment | NA | 4.47  | 0     |
| 516_vs_123639             | [full] | 2144  | No  | NA | 2  | 0  | Low-quality    | Genome-fragment | NA | 0.66  | 0     |
| 57_vs_11834               | [full] | 1050  | No  | NA | 0  | 0  | Not-determined | Genome-fragment | NA | 5.28  | 0     |
| 58_extracted_k141_83846   |        | 2144  | No  | NA | 0  | 2  | Low-quality    | Genome-fragment | NA | 3.68  | 0     |
| 57_vs_11901               | [full] | 9402  | No  | NA | 0  | 5  | Not-determined | Genome-fragment | NA | 2.17  | 0     |
| 57_vs_11918               | [full] | 1353  | No  | NA | 0  | 0  | Not-determined | Genome-fragment | NA | 1.15  | 0     |
| 58_vs_k141_174800         | [full] | 2144  | No  | NA | 2  | 0  | Low-quality    | Genome-fragment | NA | 3.66  | 0     |
| 53_extracted_k141_118010  |        | 2145  | No  | NA | 0  | 1  | Low-quality    | Genome-fragment | NA | 18.03 | 0     |
| 55_extracted_k141_4899    |        | 2145  | No  | NA | 0  | 0  | Low-quality    | Genome-fragment | NA | 0.18  | 0     |
| 57_vs_12132               | [full] | 3727  | No  | NA | 0  | 1  | Low-quality    | Genome-fragment | NA | 1.91  | 0     |
| 56_extracted_k141_16619   |        | 2145  | No  | NA | 0  | 1  | Low-quality    | Genome-fragment | NA | 3.25  | 0     |
| 513_extracted_121857      |        | 2146  | No  | NA | 3  | 0  | Low-quality    | Genome-fragment | NA | 0     | 0     |
| 57_vs_12298               | [full] | 1166  | No  | NA | 0  | 0  | Not-determined | Genome-fragment | NA | 0     | 0     |
| 57_vs_12384               | [full] | 1440  | No  | NA | 0  | 0  | Not-determined | Genome-fragment | NA | 0     | 0     |
| 514_vs_k141_82380         | [full] | 2146  | No  | NA | 0  | 0  | Low-quality    | Genome-fragment | NA | 4.15  | 0     |
| 57_vs_12405               | [full] | 2456  | No  | NA | 0  | 2  | Not-determined | Genome-fragment | NA | 4.63  | 0     |
| 57_vs_12428               | [full] | 2885  | No  | NA | 0  | 1  | Not-determined | Genome-fragment | NA | 0.69  | 0     |
| 57_vs_12482               | [full] | 2669  | No  | NA | 0  | 0  | Not-determined | Genome-fragment | NA | 1.72  | 0     |
| 514_vs_k141_10657         | [full] | 2146  | No  | NA | 0  | 1  | Low-quality    | Genome-fragment | NA | 0.18  | 0     |
| 55_vs_k141_80344          | [full] | 2146  | No  | NA | 0  | 0  | Low-quality    | Genome-fragment | NA | 3.62  | 0     |
| 516_vs_159618             | [full] | 2146  | No  | NA | 0  | 3  | Low-quality    | Genome-fragment | NA | 97.9  | 0     |
| 512_vs_k141_172020        | [full] | 2146  | No  | NA | 0  | 1  | Low-quality    | Genome-fragment | NA | 3.25  | 0     |
| 56_extracted_k141_55599   |        | 2146  | No  | NA | 0  | 0  | Low-quality    | Genome-fragment | NA | 0     | 0     |
| 517_vs_k141_154218        | [full] | 2147  | No  | NA | 0  | 0  | Low-quality    | Genome-fragment | NA | 0     | 0     |
| 57_vs_13041               | [full] | 31516 | No  | NA | 16 | 0  | High-quality   | High-quality    | NA | 53.41 | 0     |
| 59_vs_k141_19675          | [full] | 2147  | No  | NA | 0  | 1  | Low-quality    | Genome-fragment | NA | 5.34  | 0     |
| 57_vs_13154               | [full] | 2704  | No  | NA | 0  | 3  | Not-determined | Genome-fragment | NA | 0     | 0     |
| 57_vs_13217               | [full] | 2610  | No  | NA | 0  | 0  | Not-determined | Genome-fragment | NA | 0     | 0     |
| 57_vs_13370               | [full] | 31005 | No  | NA | 1  | 19 | Medium-quality | Genome-fragment | NA | 0     | 0     |
| 51_vs_k141_12416          | [full] | 2147  | No  | NA | 0  | 0  | Low-quality    | Genome-fragment | NA | 4.78  | 0     |
| 57_vs_13388               | [full] | 1011  | No  | NA | 0  | 1  | Not-determined | Genome-fragment | NA | 5.22  | 0     |
| 57_vs_13397               | [full] | 1881  | No  | NA | 0  | 0  | Not-determined | Genome-fragment | NA | 0.6   | 0     |
| 57_vs_13454               | [full] | 2448  | No  | NA | 0  | 1  | Not-determined | Genome-fragment | NA | 0     | 0     |
| 57_vs_13501               | [full] | 3330  | No  | NA | 0  | 0  | Not-determined | Genome-fragment | NA | 0     | 0     |
| 51_vs_k141_104779         | [full] | 2147  | No  | NA | 1  | 0  | Low-quality    | Genome-fragment | NA | 1.91  | 0     |
| 57_vs_13578               | [full] | 2259  | No  | NA | 2  | 3  | Not-determined | Genome-fragment | NA | 4.43  | 0     |
| 57_vs_13636               | [full] | 2735  | No  | NA | 0  | 0  | Not-determined | Genome-fragment | NA | 100   | 0     |
| 57_vs_13640               | [full] | 4835  | No  | NA | 0  | 4  | Not-determined | Genome-fragment | NA | 0     | 0     |
| 57_vs_13663               | [full] | 2312  | No  | NA | 0  | 0  | Not-determined | Genome-fragment | NA | 4.78  | 0     |
| 56_vs_k141_175789         | [full] | 2147  | No  | NA | 0  | 0  | Low-quality    | Genome-fragment | NA | 5.22  | 0     |
| 513_vs_151723             | [full] | 2148  | No  | NA | 1  | 0  | Low-quality    | Genome-fragment | NA | 0.6   | 0     |
| 51_extracted_k141_108154  |        | 2148  | No  | NA | 0  | 2  | Low-quality    | Genome-fragment | NA | 0     | 0     |
| 57_vs_13773               | [full] | 7865  | No  | NA | 4  | 4  | Not-determined | Genome-fragment | NA | 97.95 | 0     |
| 57_vs_13799               | [full] | 39151 | No  | NA | 26 | 0  | High-quality   | High-quality    | NA | 4.57  | 0     |
| 53_vs_k141_8277           | [full] | 2148  | No  | NA | 1  | 0  | Low-quality    | Genome-fragment | NA | 4.43  | 0     |
| 512_vs_k141_14627         | [full] | 2148  | No  | NA | 0  | 1  | Low-quality    | Genome-fragment | NA | 100   | 0     |
| 57_vs_13903               | [full] | 15940 | No  | NA | 7  | 0  | High-quality   | High-quality    | NA | 1.86  | 0     |
| 58_vs_k141_158966         | [full] | 2148  | No  | NA | 0  | 2  | Low-quality    | Genome-fragment | NA | 0     | 0     |
| 57_vs_14037               | [full] | 1694  | No  | NA | 0  | 0  | Not-determined | Genome-fragment | NA | 4.78  | 0     |
| 57_vs_14040               | [full] | 3226  | No  | NA | 0  | 4  | Not-determined | Genome-fragment | NA | 5.14  | 0     |
| 57_vs_14140               | [full] | 2173  | No  | NA | 0  | 3  | Not-determined | Genome-fragment | NA | 4.97  | 0     |
| 514_vs_k141_90513         | [full] | 2149  | No  | NA | 1  | 0  | Low-quality    | Genome-fragment | NA | 5.58  | 0     |
| 57_vs_14191               | [full] | 1263  | No  | NA | 0  | 0  | Not-determined | Genome-fragment | NA | 4.41  | 0     |
| 57_vs_14232               | [full] | 1003  | No  | NA | 0  | 1  | Not-determined | Genome-fragment | NA | 8.97  | 0     |
| 57_vs_14242               | [full] | 1155  | No  | NA | 0  | 1  | Not-determined | Genome-fragment | NA | 5.26  | 0     |
| 57_vs_14275               | [full] | 37684 | No  | NA | 11 | 2  | High-quality   | High-quality    | NA | 3.06  | 41.86 |
| 57_vs_14469               | [full] | 1518  | No  | NA | 0  | 1  | Not-determined | Genome-fragment | NA | 0     | 0     |
| 51_extracted_k141_25573   |        | 2149  | No  | NA | 1  | 0  | Low-quality    | Genome-fragment | NA | 5.4   | 0     |
| 57_vs_14591               | [full] | 2149  | No  | NA | 0  | 0  | Low-quality    | Genome-fragment | NA | 4.73  | 0     |
| 57_vs_14618               | [full] | 10011 | No  | NA | 0  | 7  | Not-determined | Genome-fragment | NA | 0     | 0     |
| 57_vs_14645               | [full] | 3456  | No  | NA | 0  | 2  | Not-determined | Genome-fragment | NA | 0     | 0     |
| 57_vs_14669               | [full] | 1617  | No  | NA | 0  | 2  | Not-determined | Genome-fragment | NA | 1.28  | 0     |
| 510_vs_58615              | [full] | 2149  | No  | NA | 0  | 2  | Low-quality    | Genome-fragment | NA | 5.14  | 0     |
| 512_vs_k141_57575         | [full] | 2149  | No  | NA | 0  | 1  | Low-quality    | Genome-fragment | NA | 4.97  | 0     |
| 57_vs_14804               | [full] | 1341  | No  | NA | 0  | 0  | Not-determined | Genome-fragment | NA | 5.8   | 0     |
| 512_vs_k141_101813        | [full] | 2149  | No  | NA | 0  | 2  | Low-quality    | Genome-fragment | NA | 4.41  | 0     |
| 54_extracted_13834        |        | 2149  | No  | NA | 3  | 0  | Low-quality    | Genome-fragment | NA | 8.97  | 0     |
| 57_extracted_k141_112383  |        | 2150  | No  | NA | 1  | 0  | Low-quality    | Genome-fragment | NA | 5.26  | 0     |
| 511_extracted_k141_102572 |        | 2150  | No  | NA | 1  | 0  | Low-quality    | Genome-fragment | NA | 0     | 0     |
| 511_vs_k141_59977         | [full] | 2150  | No  | NA | 6  | 0  | Low-quality    | Genome-fragment | NA | 0     | 0     |
| 57_vs_14969               | [full] | 1952  | No  | NA | 0  | 0  | Not-determined | Genome-fragment | NA | 6.58  | 0     |
| 57_vs_15045               | [full] | 1197  | No  | NA | 0  | 1  | Not-determined | Genome-fragment | NA | 0     | 0     |
| 516_extracted_34198       |        | 2150  | No  | NA | 0  | 0  | Low-quality    | Genome-fragment | NA | 3.06  | 41.86 |
| 57_vs_15101               | [full] | 1545  | No  | NA | 0  | 0  | Not-determined | Genome-fragment | NA | 0     | 0     |
| 57_vs_15236               | [full] | 1666  | No  | NA | 0  | 1  | Not-determined | Genome-fragment | NA | 4.75  | 0     |
| 516_vs_45193              | [full] | 2150  | Yes | NA | 0  | 1  | Low-quality    | Genome-fragment | NA | 1.5   | 0     |
| 57_vs_15285               | [full] | 2953  | No  | NA | 0  | 3  | Not-determined | Genome-fragment | NA | 4.36  | 0     |
| 57_vs_15288               | [full] | 1140  | No  | NA | 0  | 0  | Not-determined | Genome-fragment | NA | 1.58  | 0     |
| 57_vs_15332               | [full] | 4349  | No  | NA | 0  | 3  | Not-determined | Genome-fragment | NA | 0     | 0     |
| 512_vs_k141_39523         | [full] | 2150  | No  | NA | 2  | 0  | Low-quality    | Genome-fragment | NA | 4.45  | 0     |
| 517_extracted_k141_56036  |        | 2151  | No  | NA | 0  | 0  | Low-quality    | Genome-fragment | NA | 1.14  | 0     |
| 59_vs_k141_56262          | [full] | 2151  | No  | NA | 2  | 0  | Low-quality    | Genome-fragment | NA | 0     | 0     |
| 511_extracted_k141_16102  |        | 2151  | No  | NA | 0  | 0  | Low-quality    | Genome-fragment | NA | 4.34  | 0     |
| 57_vs_15675               | [full] | 5489  | No  | NA | 0  | 4  | Not-determined | Genome-fragment | NA | 4.79  | 0     |
| 57_vs_15694               | [full] | 2322  | No  | NA | 0  | 2  | Not-determined | Genome-fragment | NA | 0     | 0     |
| 511_vs_k141_83559         | [full] | 2151  | No  | NA | 0  | 0  | Low-quality    | Genome-fragment | NA | 5.67  | 0     |
| 57_vs_16038               | [full] | 2559  | No  | NA | 0  | 0  | Not-determined | Genome-fragment | NA | 0     | 0     |
| 514_extracted_k141_56427  |        | 2151  | No  | NA | 0  | 0  | Low-quality    | Genome-fragment | NA | 1.47  | 0     |
| 53_vs_k141_15509          | [full] | 2151  | No  | NA | 0  | 0  | Low-quality    | Genome-fragment | NA | 4.34  | 0     |
| 512_extracted_k141_114556 |        | 2151  | No  | NA | 2  | 0  | Low-quality    | Genome-fragment | NA | 4.79  | 0     |
| 57_vs_16334               | [full] | 1080  | No  | NA | 0  | 2  | Not-determined | Genome-fragment | NA | 5.53  | 83.87 |
| 57_vs_16344               | [full] | 17146 | Yes | NA | 17 | 95 | Medium-quality | Genome-fragment | NA | 5.53  | 0     |
| 52_vs_k141_11878          | [full] | 2151  | No  | NA | 0  | 0  | Low-quality    | Genome-fragment | NA | 0     | 0     |
| 57_vs_16381               | [full] | 1721  | No  | NA | 0  | 2  | Not-determined | Genome-fragment | NA | 0     | 0     |
| 57_vs_16331               | [full] | 1425  | No  | NA | 0  | 0  | Not-determined | Genome-fragment | NA | 0     | 0     |
| 57_vs_16436               | [full] | 1978  | No  | NA | 0  | 0  | Not-determined | Genome-fragment | NA | 0     | 0     |
| 517_vs_k141_152700        | [full] | 2152  | No  | NA | 2  | 0  | Low-quality    | Genome-fragment | NA | 4.45  | 0     |
| 511_vs_k141_37778         | [full] | 2152  | No  | NA | 0  | 3  | Low-quality    | Genome-fragment | NA | 1.14  | 0     |
| 57_vs_16623               | [full] | 1460  | No  | NA | 1  | 1  | Not-determined | Genome-fragment | NA | 0     | 0     |
| 57_vs_16855               | [full] | 1391  | No  | NA | 0  | 0  | Not-determined | Genome-fragment | NA | 0     | 0     |
| 51_vs_k141_125506         | [full] | 2152  | No  | NA | 0  | 1  | Low-quality    | Genome-fragment | NA | 3.97  | 0     |
| 57_vs_17076               | [full] | 3170  | No  | NA | 1  | 1  | Not-determined | Genome-fragment | NA | 0     | 0     |
| 57_vs_17118               | [full] | 5847  | No  | NA | 0  | 3  | Not-determined | Genome-fragment | NA | 0     | 0     |
| 55_extracted_k141_105667  |        | 2152  | No  | NA | 0  | 0  | Low-quality    | Genome-fragment | NA | 3.32  | 0     |
| 57_vs_17181               | [full] | 1580  | No  | NA | 0  | 1  | Not-determined | Genome-fragment | NA | 0.32  | 75.88 |
| 57_vs_17370               | [full] | 2152  | Yes | NA | 0  | 1  | Low-quality    | Genome-fragment | NA | 4.24  | 0     |
| 516_vs_65579              | [full] | 2152  | No  | NA | 0  | 0  | Low-quality    | Genome-fragment | NA | 5.16  | 0     |
| 516_vs_5882               | [full] | 2152  | No  | NA | 0  | 0  | Low-quality    | Genome-fragment | NA | 4.63  | 0     |
| 57_vs_17371               | [full] | 5918  | No  | NA | 0  | 2  | Not-determined | Genome-fragment | NA | 3.65  | 0     |
| 512_vs_k141_4714          | [full] | 2152  | No  | NA | 2  | 0  | Low-quality    | Genome-fragment | NA | 0     | 0     |
| 512_extracted_k141_45804  |        | 2152  | No  | NA | 0  | 0  | Low-quality    | Genome-fragment | NA | 0     | 0     |
| 57_vs_17655               | [full] | 1323  | No  | NA | 0  | 0  | Not-determined | Genome-fragment | NA | 0     | 0     |
| 57_vs_17695               | [full] | 5076  | No  | NA | 0  | 0  | Not-determined | Genome-fragment | NA | 0     | 0     |
| 57_vs_17696               | [full] | 2279  | No  | NA |    |    |                |                 |    |       |       |



|                           |       |       |    |      |    |    |                |                 |    |       |
|---------------------------|-------|-------|----|------|----|----|----------------|-----------------|----|-------|
| 57_vs_20286  full         |       | 11126 | No | NA   | 0  | 3  | Not-determined | Genome-fragment | NA | 0     |
| 517_extracted_k141_142126 | 2156  | Yes   |    | 1238 | 0  | 1  | Low-quality    | Genome-fragment | NA | 42.58 |
| 514_vs_k141_1089  full    | 2156  | No    | NA |      | 0  | 0  | Low-quality    | Genome-fragment | NA | 5.96  |
| 57_vs_20511  full         | 1565  | No    | NA |      | 0  | 0  | Not-determined | Genome-fragment | NA | 0     |
| 51_extracted_k141_17015   | 2156  | No    | NA |      | 0  | 0  | Low-quality    | Genome-fragment | NA | 3.74  |
| 53_vs_k141_7065  full     | 2156  | No    | NA |      | 0  | 0  | Low-quality    | Genome-fragment | NA | 4.88  |
| 57_vs_20737  full         | 1384  | No    | NA |      | 0  | 0  | Not-determined | Genome-fragment | NA | 0     |
| 57_vs_20781  full         | 1425  | No    | NA |      | 0  | 1  | Not-determined | Genome-fragment | NA | 0     |
| 57_vs_20847  full         | 2181  | No    | NA |      | 0  | 0  | Not-determined | Genome-fragment | NA | 0     |
| 516_extracted_33653       | 2156  | No    | NA |      | 0  | 1  | Low-quality    | Genome-fragment | NA | 1.65  |
| 516_vs_8608  full         | 2156  | No    | NA |      | 0  | 2  | Low-quality    | Genome-fragment | NA | 4.56  |
| 57_vs_21056  full         | 1577  | No    | NA |      | 0  | 0  | Not-determined | Genome-fragment | NA | 0     |
| 516_vs_136928  full       | 2156  | No    | NA |      | 1  | 0  | Low-quality    | Genome-fragment | NA | 7.69  |
| 56_extracted_k141_53761   | 2156  | No    | NA |      | 0  | 2  | Low-quality    | Genome-fragment | NA | 1.33  |
| 56_vs_k141_47634  full    | 2156  | No    | NA |      | 0  | 0  | Low-quality    | Genome-fragment | NA | 3.8   |
| 517_vs_k141_106271  full  | 2157  | No    | NA |      | 0  | 0  | Low-quality    | Genome-fragment | NA | 5.49  |
| 512_vs_k141_115153  full  | 2157  | No    | NA |      | 0  | 2  | Low-quality    | Genome-fragment | NA | 1.19  |
| 52_vs_k141_6230  full     | 2157  | No    | NA |      | 0  | 0  | Low-quality    | Genome-fragment | NA | 5.01  |
| 58_extracted_k141_174695  | 2157  | No    | NA |      | 0  | 2  | Low-quality    | Genome-fragment | NA | 3.09  |
| 57_vs_21450  full         | 1582  | No    | NA |      | 0  | 3  | Not-determined | Genome-fragment | NA | 0     |
| 57_vs_21521  full         | 55699 | No    | NA |      | 1  | 27 | Medium-quality | Genome-fragment | NA | 63.58 |
| 57_vs_21555  full         | 3179  | No    | NA |      | 0  | 2  | Not-determined | Genome-fragment | NA | 0     |
| 53_vs_k141_51114  full    | 2158  | No    | NA |      | 1  | 0  | Low-quality    | Genome-fragment | NA | 4.55  |
| 57_vs_21613  full         | 3613  | No    | NA |      | 0  | 0  | Not-determined | Genome-fragment | NA | 0     |
| 57_vs_21618  full         | 1840  | No    | NA |      | 0  | 0  | Not-determined | Genome-fragment | NA | 0     |
| 516_vs_10041  full        | 2158  | No    | NA |      | 0  | 2  | Low-quality    | Genome-fragment | NA | 1.03  |
| 59_vs_k141_83625  full    | 2159  | No    | NA |      | 3  | 0  | Low-quality    | Genome-fragment | NA | 6.28  |
| 511_vs_k141_96737  full   | 2159  | Yes   |    | 1712 | 1  | 1  | Low-quality    | Genome-fragment | NA | 20.7  |
| 55_vs_k141_41463  full    | 2159  | No    | NA |      | 1  | 0  | Low-quality    | Genome-fragment | NA | 4.42  |
| 57_vs_21985  full         | 1007  | No    | NA |      | 0  | 0  | Not-determined | Genome-fragment | NA | 0     |
| 57_vs_22037  full         | 1241  | No    | NA |      | 0  | 2  | Not-determined | Genome-fragment | NA | 0     |
| 57_vs_22172  full         | 7492  | No    | NA |      | 3  | 1  | Not-determined | Genome-fragment | NA | 0     |
| 57_extracted_40011        | 2159  | No    | NA |      | 0  | 1  | Low-quality    | Genome-fragment | NA | 3.44  |
| 57_vs_22243  full         | 8913  | No    | NA |      | 0  | 1  | Not-determined | Genome-fragment | NA | 0     |
| 57_vs_22277  full         | 1573  | No    | NA |      | 0  | 2  | Not-determined | Genome-fragment | NA | 0     |
| 57_vs_22315  full         | 2894  | No    | NA |      | 0  | 1  | Not-determined | Genome-fragment | NA | 0     |
| 57_vs_22325  full         | 2948  | No    | NA |      | 0  | 1  | Not-determined | Genome-fragment | NA | 0     |
| 57_vs_22337  full         | 2212  | No    | NA |      | 0  | 1  | Not-determined | Genome-fragment | NA | 0     |
| 57_vs_22383  full         | 1451  | No    | NA |      | 0  | 0  | Not-determined | Genome-fragment | NA | 0     |
| 510_vs_17465  full        | 2159  | No    | NA |      | 0  | 0  | Low-quality    | Genome-fragment | NA | 1.43  |
| 57_vs_22443  full         | 12647 | No    | NA |      | 0  | 1  | Not-determined | Genome-fragment | NA | 0     |
| 511_vs_k141_41255  full   | 2160  | No    | NA |      | 0  | 0  | Low-quality    | Genome-fragment | NA | 4.35  |
| 57_vs_22503  full         | 7887  | No    | NA |      | 0  | 5  | Not-determined | Genome-fragment | NA | 0     |
| 511_vs_k141_17014  full   | 2160  | No    | NA |      | 1  | 0  | Low-quality    | Genome-fragment | NA | 5.42  |
| 514_extracted_k141_12734  | 2160  | No    | NA |      | 2  | 0  | Low-quality    | Genome-fragment | NA | 3.74  |
| 57_vs_22759  full         | 1312  | No    | NA |      | 0  | 0  | Not-determined | Genome-fragment | NA | 0     |
| 57_vs_22791  full         | 8324  | No    | NA |      | 0  | 2  | Not-determined | Genome-fragment | NA | 0     |
| 57_vs_22954  full         | 5486  | No    | NA |      | 0  | 1  | Not-determined | Genome-fragment | NA | 0     |
| 57_vs_23011  full         | 1947  | No    | NA |      | 0  | 2  | Not-determined | Genome-fragment | NA | 0     |
| 57_vs_104695  full        | 2160  | No    | NA |      | 1  | 0  | Low-quality    | Genome-fragment | NA | 6.13  |
| 57_vs_23033  full         | 2116  | No    | NA |      | 0  | 2  | Not-determined | Genome-fragment | NA | 0     |
| 57_vs_23066  full         | 6415  | No    | NA |      | 3  | 1  | Not-determined | Genome-fragment | NA | 0     |
| 57_vs_131252  full        | 2160  | No    | NA |      | 2  | 1  | Low-quality    | Genome-fragment | NA | 4.15  |
| 516_vs_105931  full       | 2160  | No    | NA |      | 0  | 1  | Low-quality    | Genome-fragment | NA | 4.38  |
| 59_vs_k141_3515  full     | 2161  | No    | NA |      | 2  | 0  | Low-quality    | Genome-fragment | NA | 3.61  |
| 57_vs_23291  full         | 1246  | No    | NA |      | 0  | 0  | Not-determined | Genome-fragment | NA | 0     |
| 513_vs_62806  full        | 2161  | No    | NA |      | 0  | 0  | Low-quality    | Genome-fragment | NA | 4.19  |
| 510_vs_116576  full       | 2161  | No    | NA |      | 0  | 0  | Low-quality    | Genome-fragment | NA | 3.32  |
| 57_vs_23346  full         | 1187  | No    | NA |      | 0  | 0  | Not-determined | Genome-fragment | NA | 0     |
| 512_extracted_k141_90521  | 2161  | No    | NA |      | 3  | 0  | Low-quality    | Genome-fragment | NA | 4.35  |
| 56_extracted_k141_10905   | 2161  | No    | NA |      | 0  | 1  | Low-quality    | Genome-fragment | NA | 1.12  |
| 511_extracted_k141_39753  | 2162  | No    | NA |      | 0  | 0  | Low-quality    | Genome-fragment | NA | 3.33  |
| 511_vs_k141_86847  full   | 2162  | No    | NA |      | 1  | 0  | Low-quality    | Genome-fragment | NA | 1.33  |
| 516_vs_34870  full        | 2162  | No    | NA |      | 0  | 3  | Low-quality    | Genome-fragment | NA | 0.72  |
| 56_vs_k141_2894  full     | 2162  | No    | NA |      | 1  | 0  | Low-quality    | Genome-fragment | NA | 4.28  |
| 516_vs_100294  full       | 2163  | No    | NA |      | 0  | 0  | Low-quality    | Genome-fragment | NA | 4.05  |
| 57_vs_23770  full         | 23399 | No    | NA |      | 17 | 0  | Medium-quality | Genome-fragment | NA | 65.59 |
| 517_vs_k141_19620  full   | 2164  | No    | NA |      | 2  | 0  | Low-quality    | Genome-fragment | NA | 5.44  |
| 57_vs_23799  full         | 4399  | No    | NA |      | 0  | 0  | Not-determined | Genome-fragment | NA | 0     |
| 57_vs_23922  full         | 1844  | No    | NA |      | 0  | 1  | Not-determined | Genome-fragment | NA | 0     |
| 53_vs_k141_113000  full   | 2164  | No    | NA |      | 1  | 0  | Low-quality    | Genome-fragment | NA | 1.54  |
| 57_vs_23981  full         | 13009 | No    | NA |      | 0  | 0  | Not-determined | Genome-fragment | NA | 0     |
| 57_vs_24070  full         | 3819  | No    | NA |      | 0  | 2  | Not-determined | Genome-fragment | NA | 0     |
| 516_extracted_58592       | 2164  | No    | NA |      | 1  | 0  | Low-quality    | Genome-fragment | NA | 2.56  |
| 516_extracted_142717      | 2164  | No    | NA |      | 3  | 0  | Low-quality    | Genome-fragment | NA | 3.77  |
| 57_vs_24199  full         | 2279  | No    | NA |      | 0  | 2  | Not-determined | Genome-fragment | NA | 0     |
| 510_extracted_98469       | 2164  | Yes   |    | 1573 | 1  | 1  | Low-quality    | Genome-fragment | NA | 27.31 |
| 57_vs_24352  full         | 1089  | No    | NA |      | 0  | 0  | Not-determined | Genome-fragment | NA | 0     |
| 56_vs_k141_13613  full    | 2164  | No    | NA |      | 0  | 0  | Low-quality    | Genome-fragment | NA | 3.37  |
| 56_vs_k141_41135  full    | 2164  | No    | NA |      | 0  | 0  | Low-quality    | Genome-fragment | NA | 5.62  |
| 58_vs_k141_10832  full    | 2164  | No    | NA |      | 0  | 1  | Low-quality    | Genome-fragment | NA | 3.46  |
| 57_vs_24500  full         | 1147  | No    | NA |      | 0  | 0  | Not-determined | Genome-fragment | NA | 0     |
| 513_vs_93547  full        | 2165  | No    | NA |      | 0  | 1  | Low-quality    | Genome-fragment | NA | 2.88  |
| 51_extracted_k141_110316  | 2165  | No    | NA |      | 1  | 0  | Low-quality    | Genome-fragment | NA | 6.1   |
| 57_vs_24724  full         | 1334  | No    | NA |      | 0  | 0  | Not-determined | Genome-fragment | NA | 0     |
| 57_vs_24805  full         | 2812  | No    | NA |      | 0  | 1  | Not-determined | Genome-fragment | NA | 0     |
| 51_vs_k141_65833  full    | 2165  | No    | NA |      | 3  | 0  | Low-quality    | Genome-fragment | NA | 4.76  |
| 57_vs_24843  full         | 1646  | No    | NA |      | 0  | 1  | Not-determined | Genome-fragment | NA | 0     |
| 57_extracted_28694        | 2165  | No    | NA |      | 0  | 0  | Low-quality    | Genome-fragment | NA | 4.08  |
| 57_vs_46382  full         | 2165  | No    | NA |      | 3  | 0  | Low-quality    | Genome-fragment | NA | 3.57  |
| 516_vs_129540  full       | 2165  | No    | NA |      | 1  | 0  | Low-quality    | Genome-fragment | NA | 3.18  |
| 57_vs_25035  full         | 2909  | No    | NA |      | 0  | 1  | Not-determined | Genome-fragment | NA | 0     |
| 514_vs_k141_93711  full   | 2166  | No    | NA |      | 1  | 0  | Low-quality    | Genome-fragment | NA | 5.99  |
| 516_vs_798  full          | 2166  | No    | NA |      | 1  | 0  | Low-quality    | Genome-fragment | NA | 1.29  |
| 57_vs_25125  full         | 1028  | No    | NA |      | 0  | 0  | Not-determined | Genome-fragment | NA | 0     |
| 512_vs_k141_107436  full  | 2166  | No    | NA |      | 1  | 0  | Low-quality    | Genome-fragment | NA | 0.18  |
| 57_vs_25281  full         | 1834  | No    | NA |      | 0  | 2  | Not-determined | Genome-fragment | NA | 0     |
| 58_vs_k141_105412  full   | 2166  | No    | NA |      | 2  | 0  | Low-quality    | Genome-fragment | NA | 5.33  |
| 517_vs_k141_43433  full   | 2167  | No    | NA |      | 0  | 1  | Low-quality    | Genome-fragment | NA | 1.42  |
| 514_vs_k141_61836  full   | 2167  | No    | NA |      | 0  | 0  | Low-quality    | Genome-fragment | NA | 3.74  |
| 57_vs_25466  full         | 1533  | No    | NA |      | 0  | 0  | Not-determined | Genome-fragment | NA | 0     |
| 57_vs_25565  full         | 1541  | No    | NA |      | 0  | 1  | Not-determined | Genome-fragment | NA | 0     |
| 57_vs_25618  full         | 6740  | No    | NA |      | 0  | 1  | Not-determined | Genome-fragment | NA | 0     |
| 53_extracted_k141_19547   | 2167  | No    | NA |      | 0  | 1  | Low-quality    | Genome-fragment | NA | 0.58  |
| 57_vs_104650  full        | 2167  | No    | NA |      | 0  | 0  | Low-quality    | Genome-fragment | NA | 5.49  |
| 57_vs_25746  full         | 3381  | No    | NA |      | 0  | 0  | Not-determined | Genome-fragment | NA | 0     |
| 57_vs_25759  full         | 1509  | No    | NA |      | 0  | 1  | Not-determined | Genome-fragment | NA | 0     |
| 512_vs_k141_9990  full    | 2167  | No    | NA |      | 0  | 0  | Low-quality    | Genome-fragment | NA | 0     |
| 57_vs_25931  full         | 3002  | No    | NA |      | 0  | 3  | Not-determined | Genome-fragment | NA | 0     |
| 57_vs_26007  full         | 3891  | No    | NA |      | 0  | 0  | Not-determined | Genome-fragment | NA | 0     |
| 56_vs_k141_19921  full    | 2167  | No    | NA |      | 0  | 0  | Low-quality    | Genome-fragment | NA | 7.22  |
| 513_vs_24225  full        | 2168  | No    | NA |      | 0  | 1  | Low-quality    | Genome-fragment | NA | 0.57  |
| 514_extracted_k141_56768  | 2168  | No    | NA |      | 1  | 0  | Low-quality    | Genome-fragment | NA | 1.2   |
| 57_vs_26235  full         | 30810 | No    | NA |      | 16 | 2  | Medium-quality | Genome-fragment | NA | 82.23 |
| 57_vs_k141_4645  full     | 2168  | No    | NA |      | 3  | 0  | Low-quality    | Genome-fragment | NA | 5.39  |
| 510_vs_71823  full        | 2168  | No    | NA |      | 3  | 0  | Low-quality    | Genome-fragment | NA | 5.27  |
| 57_vs_26330  full         | 8257  | No    | NA |      | 0  | 8  | Not-determined | Genome-fragment | NA | 0     |
| 57_vs_26487  full         | 3584  | No    | NA |      | 0  | 1  | Not-determined | Genome-fragment | NA | 0     |
| 517_extracted_k141_892    | 2169  | No    | NA |      | 2  | 0  | Low-quality    | Genome-fragment | NA | 7.15  |
| 57_vs_26571  full         | 7227  | No    | NA |      | 0  | 5  | Not-determined | Genome-fragment | NA | 0     |
| 57_vs_26608  full         | 2626  | No    | NA |      | 0  | 2  | Not-determined | Genome-fragment | NA | 0     |
| 57_vs_26741  full         | 1463  | No    | NA |      | 0  | 0  | Not-determined | Genome-fragment | NA | 0     |
| 514_vs_k141_61124  full   | 2169  | No    | NA |      | 0  | 0  | Low-quality    | Genome-fragment | NA | 4.13  |
| 57_vs_26757  full         | 5493  | No    | NA |      | 0  | 3  | Medium-quality | Genome-fragment | NA | 62.42 |
| 55_vs_k141_96849  full    | 2169  | No    | NA |      | 0  | 0  | Low-quality    | Genome-fragment | NA | 3.15  |
| 57_vs_26842  full         | 1717  | No    | NA |      | 0  | 1  | Not-determined | Genome-fragment | NA | 0     |
| 510_vs_89867  full        | 2169  | No    | NA |      | 0  | 2  | Low-quality    | Genome-fragment | NA | 0.73  |
| 59_extracted_k141_78873   | 2170  | No    | NA |      | 0  | 0  | Low-quality    | Genome-fragment | NA | 2.87  |
| 59_vs_k141_44581  full    | 2170  | No    | NA |      | 0  | 0  | Low-quality    | Genome-fragment | NA | 3.56  |
| 514_extracted_k141_25223  | 2170  | No    | NA |      | 1  | 0  | Low-quality    | Genome-fragment | NA | 1.61  |
| 57_vs_27471  full         | 1471  | No    | NA |      | 0  | 0  | Not-determined | Genome-fragment | NA | 0     |
| 57_vs_27471  full         | 3939  | No    | NA |      | 0  | 2  | Not-determined | Genome-fragment | NA | 0     |
| 55_vs_k141_92535  full    | 2170  | No    | NA |      | 0  | 2  | Low-quality    | Genome-fragment | NA | 0.89  |
| 55_vs_k141_101329  full   | 2170  | No    | NA |      | 0  | 0  | Low-quality    | Genome-fragment | NA | 4.94  |
| 57_vs_27590  full         | 2790  | No    | NA |      | 0  | 3  | Not-determined | Genome-fragment | NA | 0     |
| 57_vs_27675  full         | 1905  | No    | NA |      | 0  | 2  | Not-determined | Genome-fragment | NA | 0     |
| 57_vs_27677  full         | 1442  | No    | NA |      | 0  | 0  | Not-determined | Genome-fragment | NA | 0     |
| 58_vs_k141_190521  full   | 2170  | No    | NA |      | 0  | 0  | Low-quality    | Genome-fragment | NA | 5.05  |
| 57_extracted_113982       | 2171  | No    | NA |      | 0  | 0  | Low-quality    | Genome-fragment | NA | 5.43  |



|                           |          |       |     |      |    |                |                 |                 |       |      |
|---------------------------|----------|-------|-----|------|----|----------------|-----------------|-----------------|-------|------|
| 59_vs_k141_40322          | [full]   | 2175  | No  | NA   | 0  | 1              | Low-quality     | Genome-fragment | 5.93  | 0    |
| 513_extracted_61108       | [full]   | 2175  | No  | NA   | 0  | 2              | Low-quality     | Genome-fragment | 1.42  | 0    |
| 56_vs_k141_48086          | [full]   | 2175  | No  | NA   | 2  | 0              | Low-quality     | Genome-fragment | 4.95  | 0    |
| 57_vs_29595               | [full]   | 71684 | No  | NA   | 14 | 0              | Medium-quality  | Genome-fragment | 82.12 | 0    |
| 58_vs_k141_88752          | [full]   | 2175  | No  | NA   | 0  | 1              | Low-quality     | Genome-fragment | 1.51  | 0    |
| 57_vs_29707               | [full]   | 1514  | No  | NA   | 0  | 0              | Not-determined  | Genome-fragment | NA    | 0    |
| 57_vs_29718               | [full]   | 2649  | No  | NA   | 0  | 0              | Not-determined  | Genome-fragment | NA    | 0    |
| 58_vs_k141_39759          | [full]   | 2175  | No  | NA   | 0  | 1              | Low-quality     | Genome-fragment | 1.29  | 0    |
| 57_vs_29844               | [full]   | 1523  | No  | NA   | 0  | 0              | Not-determined  | Genome-fragment | NA    | 0    |
| 57_vs_29912               | [full]   | 3565  | No  | NA   | 0  | 0              | Not-determined  | Genome-fragment | NA    | 0    |
| 57_vs_30074               | [full]   | 1043  | No  | NA   | 0  | 0              | Not-determined  | Genome-fragment | NA    | 0    |
| 59_extracted_k141_16711   | [full]   | 2176  | No  | NA   | 2  | 0              | Low-quality     | Genome-fragment | 3.63  | 0    |
| 51_vs_k141_36607          | [full]   | 2176  | No  | NA   | 1  | 0              | Low-quality     | Genome-fragment | 2.72  | 0    |
| 57_vs_38565               | [full]   | 2176  | Yes | 1645 | 1  | 1              | Low-quality     | Genome-fragment | 3.17  | 24.4 |
| 516_vs_114402             | [H2gene] | 2176  | No  | NA   | 1  | 0              | Low-quality     | Genome-fragment | 5.04  | 0    |
| 58_vs_k141_103539         | [full]   | 2176  | No  | NA   | 0  | 1              | Low-quality     | Genome-fragment | 5.57  | 0    |
| 516_vs_95931              | [full]   | 2177  | No  | NA   | 1  | 0              | Low-quality     | Genome-fragment | 5.49  | 0    |
| 56_extracted_k141_40453   | [full]   | 2177  | No  | NA   | 0  | 1              | Low-quality     | Genome-fragment | 2.22  | 0    |
| 57_vs_30505               | [full]   | 2545  | No  | NA   | 0  | 0              | Not-determined  | Genome-fragment | NA    | 0    |
| 57_vs_30591               | [full]   | 8932  | No  | NA   | 0  | 1              | Not-determined  | Genome-fragment | NA    | 0    |
| 58_vs_k141_10221          | [full]   | 2177  | No  | NA   | 0  | 1              | Low-quality     | Genome-fragment | 2.19  | 0    |
| 57_vs_30640               | [full]   | 30658 | No  | NA   | 16 | 0              | Medium-quality  | Genome-fragment | 81.93 | 0    |
| 57_vs_30665               | [full]   | 9811  | No  | NA   | 6  | 1              | Medium-quality  | Genome-fragment | 70.37 | 0    |
| 57_vs_125016              | [full]   | 2178  | No  | NA   | 3  | 0              | Low-quality     | Genome-fragment | 5.98  | 0    |
| 58_vs_k141_182178         | [full]   | 2178  | No  | NA   | 0  | 2              | Low-quality     | Genome-fragment | 2.39  | 0    |
| 57_vs_30771               | [full]   | 1668  | No  | NA   | 0  | 2              | Not-determined  | Genome-fragment | NA    | 0    |
| 517_vs_k141_54095         | [full]   | 2179  | No  | NA   | 1  | 0              | Low-quality     | Genome-fragment | 3.48  | 0    |
| 57_vs_31151               | [full]   | 1174  | No  | NA   | 0  | 1              | Not-determined  | Genome-fragment | NA    | 0    |
| 59_extracted_k141_77469   | [full]   | 2179  | No  | NA   | 0  | 0              | Low-quality     | Genome-fragment | 1.26  | 0    |
| 57_vs_31271               | [full]   | 1286  | No  | NA   | 0  | 0              | Not-determined  | Genome-fragment | NA    | 0    |
| 512_vs_k141_125488        | [full]   | 2179  | No  | NA   | 0  | 1              | Low-quality     | Genome-fragment | 1.45  | 0    |
| 511_extracted_k141_103590 | [full]   | 2180  | No  | NA   | 0  | 0              | Low-quality     | Genome-fragment | 5.47  | 0    |
| 55_extracted_k141_124627  | [full]   | 2180  | No  | NA   | 3  | 0              | Low-quality     | Genome-fragment | 5.75  | 0    |
| 55_vs_k141_107028         | [full]   | 2180  | No  | NA   | 1  | 0              | Low-quality     | Genome-fragment | 1.41  | 0    |
| 57_vs_31431               | [full]   | 3914  | No  | NA   | 0  | 2              | Not-determined  | Genome-fragment | NA    | 0    |
| 57_vs_31470               | [full]   | 5648  | No  | NA   | 0  | 2              | Not-determined  | Genome-fragment | NA    | 0    |
| 57_vs_31535               | [full]   | 12423 | No  | NA   | 0  | 0              | Not-determined  | Genome-fragment | NA    | 0    |
| 55_vs_k141_12440          | [full]   | 2180  | No  | NA   | 1  | 0              | Low-quality     | Genome-fragment | 4.75  | 0    |
| 55_vs_k141_12372          | [full]   | 2180  | No  | NA   | 0  | 0              | Low-quality     | Genome-fragment | 4.45  | 0    |
| 55_vs_k141_66646          | [full]   | 2180  | No  | NA   | 0  | 0              | Low-quality     | Genome-fragment | 4.61  | 0    |
| 516_vs_12948              | [full]   | 2180  | No  | NA   | 0  | 0              | Low-quality     | Genome-fragment | 4.68  | 0    |
| 516_vs_115788             | [full]   | 2180  | No  | NA   | 0  | 0              | Low-quality     | Genome-fragment | 5.62  | 0    |
| 57_vs_31714               | [full]   | 3320  | No  | NA   | 0  | 2              | Not-determined  | Genome-fragment | NA    | 0    |
| 57_vs_31721               | [full]   | 2136  | No  | NA   | 0  | 1              | Not-determined  | Genome-fragment | NA    | 0    |
| 510_extracted_22224       | [full]   | 2180  | No  | NA   | 0  | 0              | Low-quality     | Genome-fragment | 3.39  | 0    |
| 510_vs_73380              | [full]   | 2180  | No  | NA   | 0  | 0              | Low-quality     | Genome-fragment | 5.13  | 0    |
| 57_vs_31843               | [full]   | 2812  | No  | NA   | 0  | 0              | Not-determined  | Genome-fragment | NA    | 0    |
| 57_vs_31848               | [full]   | 6904  | No  | NA   | 0  | 3              | Not-determined  | Genome-fragment | NA    | 0    |
| 57_vs_31890               | [full]   | 1515  | No  | NA   | 0  | 1              | Not-determined  | Genome-fragment | NA    | 0    |
| 512_extracted_k141_105160 | [full]   | 2180  | No  | NA   | 0  | 2              | Low-quality     | Genome-fragment | 0.36  | 0    |
| 57_vs_32043               | [full]   | 3177  | No  | NA   | 0  | 0              | Not-determined  | Genome-fragment | NA    | 0    |
| 57_vs_32096               | [full]   | 1040  | No  | NA   | 0  | 1              | Not-determined  | Genome-fragment | NA    | 0    |
| 57_vs_32184               | [full]   | 2022  | No  | NA   | 0  | 2              | Not-determined  | Genome-fragment | NA    | 0    |
| 512_vs_k141_32849         | [full]   | 2180  | No  | NA   | 3  | 0              | Low-quality     | Genome-fragment | 3.62  | 0    |
| 511_extracted_k141_28778  | [full]   | 2181  | No  | NA   | 0  | 0              | Low-quality     | Genome-fragment | 5.6   | 0    |
| 57_vs_32260               | [full]   | 1933  | No  | NA   | 2  | 2              | Not-determined  | Genome-fragment | NA    | 0    |
| 57_vs_32308               | [full]   | 6450  | No  | NA   | 0  | 3              | Not-determined  | Genome-fragment | NA    | 0    |
| 51_extracted_k141_79245   | [full]   | 2181  | No  | NA   | 0  | 2              | Low-quality     | Genome-fragment | 0.58  | 0    |
| 53_vs_k141_104152         | [full]   | 2181  | No  | NA   | 0  | 0              | Low-quality     | Genome-fragment | 5.38  | 0    |
| 59_vs_k141_83584          | [full]   | 2182  | No  | NA   | 1  | 0              | Low-quality     | Genome-fragment | 16.92 | 0    |
| 514_vs_k141_55728         | [full]   | 2182  | No  | NA   | 1  | 0              | Low-quality     | Genome-fragment | 1.6   | 0    |
| 51_vs_k141_59827          | [full]   | 2182  | No  | NA   | 1  | 1              | Low-quality     | Genome-fragment | 2.67  | 0    |
| 58_vs_k141_74774          | [full]   | 2182  | No  | NA   | 3  | 0              | Low-quality     | Genome-fragment | 6.05  | 0    |
| 513_vs_146543             | [full]   | 2183  | No  | NA   | 0  | 1              | Low-quality     | Genome-fragment | 2.74  | 0    |
| 57_vs_32822               | [full]   | 1508  | No  | NA   | 0  | 0              | Not-determined  | Genome-fragment | NA    | 0    |
| 57_vs_32840               | [full]   | 5605  | No  | NA   | 0  | 1              | Not-determined  | Genome-fragment | NA    | 0    |
| 57_vs_32964               | [full]   | 5795  | No  | NA   | 0  | 3              | Not-determined  | Genome-fragment | NA    | 0    |
| 57_vs_32973               | [full]   | 1347  | No  | NA   | 0  | 0              | Not-determined  | Genome-fragment | NA    | 0    |
| 516_vs_144518             | [full]   | 2183  | No  | NA   | 0  | 0              | Low-quality     | Genome-fragment | 2.05  | 0    |
| 512_vs_k141_112743        | [full]   | 2183  | No  | NA   | 0  | 0              | Low-quality     | Genome-fragment | 4.85  | 0    |
| 57_vs_33067               | [full]   | 3073  | No  | NA   | 0  | 2              | Not-determined  | Genome-fragment | NA    | 0    |
| 57_vs_33076               | [full]   | 5878  | No  | NA   | 4  | Not-determined | Genome-fragment | NA              | 0     |      |
| 57_vs_33085               | [full]   | 2880  | No  | NA   | 0  | 3              | Not-determined  | Genome-fragment | NA    | 0    |
| 57_vs_33180               | [full]   | 2390  | No  | NA   | 0  | 3              | Not-determined  | Genome-fragment | NA    | 0    |
| 54_extracted_17347        | [full]   | 2183  | No  | NA   | 2  | 0              | Low-quality     | Genome-fragment | 4.3   | 0    |
| 58_vs_k141_20803          | [full]   | 2183  | No  | NA   | 2  | 0              | Low-quality     | Genome-fragment | 5.02  | 0    |
| 59_extracted_k141_60460   | [full]   | 2184  | No  | NA   | 3  | 0              | Low-quality     | Genome-fragment | 5.04  | 0    |
| 59_vs_k141_16114          | [H2gene] | 2184  | No  | NA   | 2  | 0              | Low-quality     | Genome-fragment | 4.89  | 0    |
| 514_vs_k141_88751         | [full]   | 2184  | No  | NA   | 0  | 0              | Low-quality     | Genome-fragment | 5.38  | 0    |
| 516_vs_146301             | [full]   | 2184  | No  | NA   | 0  | 0              | Low-quality     | Genome-fragment | 5.01  | 0    |
| 58_extracted_k141_29190   | [full]   | 2184  | No  | NA   | 0  | 2              | Low-quality     | Genome-fragment | 1.04  | 0    |
| 57_vs_33452               | [full]   | 2185  | No  | NA   | 0  | 0              | Low-quality     | Genome-fragment | 5.46  | 0    |
| 57_vs_34124               | [full]   | 1905  | No  | NA   | 0  | 0              | Not-determined  | Genome-fragment | NA    | 0    |
| 57_vs_34130               | [full]   | 4192  | No  | NA   | 0  | 0              | Not-determined  | Genome-fragment | NA    | 0    |
| 512_vs_k141_80046         | [full]   | 2185  | No  | NA   | 0  | 0              | Low-quality     | Genome-fragment | 3.31  | 0    |
| 57_vs_34226               | [full]   | 6675  | No  | NA   | 0  | 2              | Not-determined  | Genome-fragment | NA    | 0    |
| 512_vs_k141_78140         | [full]   | 2185  | No  | NA   | 0  | 1              | Low-quality     | Genome-fragment | 2.9   | 0    |
| 57_vs_34495               | [full]   | 9623  | No  | NA   | 0  | 1              | Not-determined  | Genome-fragment | NA    | 0    |
| 54_extracted_10895        | [full]   | 2185  | No  | NA   | 0  | 0              | Low-quality     | Genome-fragment | 7.21  | 0    |
| 58_extracted_k141_30558   | [full]   | 2185  | No  | NA   | 2  | 0              | Low-quality     | Genome-fragment | 6.78  | 0    |
| 511_vs_k141_78211         | [full]   | 2186  | No  | NA   | 0  | 0              | Low-quality     | Genome-fragment | 2.73  | 0    |
| 57_vs_5211                | [full]   | 2186  | No  | NA   | 0  | 0              | Low-quality     | Genome-fragment | 6.21  | 0    |
| 57_vs_34787               | [full]   | 6138  | No  | NA   | 0  | 3              | Not-determined  | Genome-fragment | NA    | 0    |
| 57_vs_20420               | [full]   | 2186  | No  | NA   | 0  | 0              | Low-quality     | Genome-fragment | 2.4   | 0    |
| 516_extracted_115118      | [full]   | 2186  | No  | NA   | 1  | 1              | Low-quality     | Genome-fragment | 1.96  | 0    |
| 510_vs_19955              | [full]   | 2186  | No  | NA   | 0  | 2              | Low-quality     | Genome-fragment | 3.5   | 0    |
| 57_vs_34966               | [full]   | 1197  | No  | NA   | 0  | 2              | Not-determined  | Genome-fragment | NA    | 0    |
| 57_vs_34997               | [full]   | 2222  | No  | NA   | 0  | 1              | Not-determined  | Genome-fragment | NA    | 0    |
| 510_vs_55742              | [full]   | 2186  | No  | NA   | 0  | 1              | Low-quality     | Genome-fragment | 5.17  | 0    |
| 515_vs_71673              | [full]   | 2186  | No  | NA   | 0  | 0              | Low-quality     | Genome-fragment | 0.62  | 0    |
| 57_vs_35091               | [full]   | 6084  | No  | NA   | 0  | 3              | Not-determined  | Genome-fragment | NA    | 4.7  |
| 517_vs_k141_125569        | [full]   | 2187  | No  | NA   | 0  | 0              | Low-quality     | Genome-fragment | NA    | 0    |
| 57_vs_35121               | [full]   | 1879  | No  | NA   | 0  | 1              | Not-determined  | Genome-fragment | NA    | 0    |
| 57_vs_k141_80807          | [full]   | 2187  | No  | NA   | 0  | 0              | Low-quality     | Genome-fragment | 4.33  | 0    |
| 57_vs_35195               | [full]   | 1115  | No  | NA   | 0  | 1              | Not-determined  | Genome-fragment | NA    | 0    |
| 57_vs_35351               | [full]   | 2417  | No  | NA   | 0  | 0              | Not-determined  | Genome-fragment | NA    | 0    |
| 57_vs_35393               | [full]   | 3105  | No  | NA   | 0  | 3              | Not-determined  | Genome-fragment | NA    | 0    |
| 57_vs_35420               | [full]   | 5484  | No  | NA   | 0  | 1              | Not-determined  | Genome-fragment | NA    | 0    |
| 57_extracted_54859        | [full]   | 2187  | No  | NA   | 0  | 0              | Low-quality     | Genome-fragment | 33.7  | 0    |
| 57_vs_35513               | [full]   | 3171  | No  | NA   | 0  | 0              | Not-determined  | Genome-fragment | NA    | 0    |
| 57_vs_35521               | [full]   | 3469  | No  | NA   | 0  | 2              | Not-determined  | Genome-fragment | NA    | 1.1  |
| 516_extracted_31444       | [full]   | 2187  | No  | NA   | 0  | 1              | Low-quality     | Genome-fragment | NA    | 0    |
| 516_vs_167097             | [full]   | 2187  | No  | NA   | 0  | 3              | Low-quality     | Genome-fragment | 1.34  | 0    |
| 57_vs_35740               | [full]   | 7866  | No  | NA   | 0  | 4              | Not-determined  | Genome-fragment | NA    | 0    |
| 57_vs_35777               | [full]   | 4401  | No  | NA   | 5  | Not-determined | Genome-fragment | NA              | 0     |      |
| 510_vs_116968             | [full]   | 2187  | No  | NA   | 0  | 0              | Low-quality     | Genome-fragment | 3.55  | 0    |
| 512_vs_k141_17527         | [full]   | 2187  | No  | NA   | 1  | 0              | Low-quality     | Genome-fragment | 2.76  | 0    |
| 511_vs_k141_11129         | [full]   | 2188  | No  | NA   | 0  | 0              | Low-quality     | Genome-fragment | 3.72  | 0    |
| 51_vs_k141_137804         | [full]   | 2188  | No  | NA   | 0  | 0              | Low-quality     | Genome-fragment | 5.02  | 0    |
| 57_vs_36164               | [full]   | 1034  | No  | NA   | 0  | 1              | Not-determined  | Genome-fragment | NA    | 0    |
| 57_vs_36358               | [full]   | 8450  | No  | NA   | 0  | 4              | Not-determined  | Genome-fragment | NA    | 0    |
| 512_vs_k141_127842        | [full]   | 2188  | No  | NA   | 0  | 1              | Low-quality     | Genome-fragment | 3.3   | 0    |
| 58_vs_k141_134084         | [full]   | 2188  | No  | NA   | 0  | 2              | Low-quality     | Genome-fragment | 1.52  | 0    |
| 516_vs_k141_6769          | [full]   | 2189  | No  | NA   | 0  | 3              | Low-quality     | Genome-fragment | 1.61  | 0    |
| 57_extracted_5273         | [full]   | 2189  | No  | NA   | 0  | 0              | Low-quality     | Genome-fragment | 7.72  | 0    |
| 57_vs_36751               | [full]   | 4447  | No  | NA   | 0  | 0              | Not-determined  | Genome-fragment | NA    | 0    |
| 57_vs_36820               | [full]   | 4948  | No  | NA   | 0  | 2              | Not-determined  | Genome-fragment | NA    | 0    |
| 57_extracted_92011        | [full]   | 2189  | No  | NA   | 4  | 0              | Low-quality     | Genome-fragment | 9.98  | 0    |
| 57_vs_12921               | [full]   | 2189  | No  | NA   | 2  | 0              | Low-quality     | Genome-fragment | 5.03  | 0    |
| 512_extracted_k141_28826  | [full]   | 2189  | No  | NA   | 1  | 0              | Low-quality     | Genome-fragment | 1.84  | 0    |
| 55_vs_k141_57107          | [full]   | 2190  | No  | NA   | 0  | 0              | Low-quality     | Genome-fragment | 3.91  | 0    |
| 516_vs_63008              | [full]   | 2190  | No  | NA   | 0  | 1              | Low-quality     | Genome-fragment | 4     | 0    |
| 512_vs_k141_150255        | [full]   | 2190  | No  | NA   | 1  | 0              | Low-quality     | Genome-fragment | 4     | 0    |
| 517_extracted_k141_35974  | [full]   | 2191  | No  | NA   | 1  | 0              | Low-quality     | Genome-fragment | 3.28  | 0    |
| 517_vs_k141_100928        | [full]   | 2191  | No  | NA   | 0  | 0              | Low-quality     | Genome-fragment | 5.22  | 0    |
| 57_vs_37202               | [full]   | 3498  | No  | NA   | 0  | 1              | Not-determined  | Genome-fragment | NA    | 0    |
| 514_vs_k141_36442         | [full]   | 2191  | No  | NA   | 2  | 0              | Low-quality     | Genome-fragment | 4.08  | 0    |
| 57_vs_37233               | [full]   | 1674  | No  | NA   | 0  | 1              | Not-determined  | Genome-fragment | NA    | 0    |
| 57_vs_37317               | [full]   | 4542  | No  |      |    |                |                 |                 |       |      |



|                           |          |       |     |      |    |    |                 |                 |       |       |
|---------------------------|----------|-------|-----|------|----|----|-----------------|-----------------|-------|-------|
| 59_vs_k141_49504          | [full]   | 2195  | No  | NA   | 0  | 2  | Low-quality     | Genome-fragment | 4.42  | 0     |
| 57_vs_38834               | [full]   | 20668 | No  | NA   | 13 | 0  | Medium-quality  | Genome-fragment | 58.53 | 0     |
| 57_vs_38838               | [full]   | 1594  | No  | NA   | 0  | 0  | Not-determined  | Genome-fragment | NA    | 0     |
| 57_vs_38880               | [full]   | 2045  | No  | NA   | 0  | 1  | Not-determined  | Genome-fragment | NA    | 0     |
| 57_vs_24481               | [full]   | 2195  | No  | NA   | 5  | 0  | Low-quality     | Genome-fragment | 5.92  | 0     |
| 57_vs_112972              | [full]   | 2195  | No  | NA   | 0  | 0  | Low-quality     | Genome-fragment | 2.79  | 0     |
| 516_vs_61402              | [full]   | 2195  | No  | NA   | 2  | 0  | Low-quality     | Genome-fragment | 3.17  | 0     |
| 54_extracted_2612         |          | 2195  | No  | NA   | 0  | 3  | Low-quality     | Genome-fragment | 0.94  | 0     |
| 57_vs_39120               | [full]   | 2446  | No  | NA   | 0  | 3  | Not-determined  | Genome-fragment | NA    | 0     |
| 510_vs_73129              | [full]   | 2196  | No  | NA   | 0  | 1  | Low-quality     | Genome-fragment | 4.22  | 0     |
| 512_vs_k141_39516         | [full]   | 2196  | No  | NA   | 0  | 0  | Low-quality     | Genome-fragment | 5.65  | 0     |
| 51_vs_k141_152148         | [full]   | 2197  | No  | NA   | 0  | 0  | Low-quality     | Genome-fragment | 4.4   | 0     |
| 516_vs_109402             | [t2gene] | 2197  | No  | NA   | 1  | 0  | Low-quality     | Genome-fragment | 4.03  | 0     |
| 57_vs_39356               | [full]   | 2238  | No  | NA   | 0  | 2  | Not-determined  | Genome-fragment | NA    | 0     |
| 57_vs_39373               | [full]   | 1802  | No  | NA   | 0  | 1  | Not-determined  | Genome-fragment | NA    | 0     |
| 57_vs_39382               | [full]   | 1844  | No  | NA   | 0  | 1  | Not-determined  | Genome-fragment | NA    | 0     |
| 57_vs_39393               | [full]   | 1104  | No  | NA   | 0  | 0  | Not-determined  | Genome-fragment | NA    | 0     |
| 510_vs_7647               | [full]   | 2197  | No  | NA   | 0  | 1  | Low-quality     | Genome-fragment | 5.37  | 0     |
| 57_vs_39456               | [full]   | 2128  | No  | NA   | 0  | 0  | Not-determined  | Genome-fragment | NA    | 0     |
| 512_vs_k141_37691         | [full]   | 2197  | No  | NA   | 0  | 0  | Low-quality     | Genome-fragment | 3.88  | 0     |
| 57_vs_39631               | [full]   | 3105  | No  | NA   | 0  | 3  | Not-determined  | Genome-fragment | NA    | 0     |
| 56_vs_k141_12928          | [full]   | 2197  | No  | NA   | 2  | 0  | Low-quality     | Genome-fragment | 3.65  | 0     |
| 517_vs_k141_106962        | [full]   | 2198  | No  | NA   | 0  | 0  | Low-quality     | Genome-fragment | 3.33  | 0     |
| 53_vs_k141_113526         | [full]   | 2198  | No  | NA   | 1  | 0  | Low-quality     | Genome-fragment | 2.91  | 0     |
| 57_vs_39740               | [full]   | 3068  | No  | NA   | 0  | 0  | Not-determined  | Genome-fragment | NA    | 0     |
| 53_vs_k141_10008          | [full]   | 2198  | No  | NA   | 0  | 0  | Low-quality     | Genome-fragment | 4.8   | 0     |
| 516_vs_93295              | [full]   | 2198  | No  | NA   | 1  | 0  | Low-quality     | Genome-fragment | 5.62  | 0     |
| 57_vs_40050               | [full]   | 2069  | No  | NA   | 0  | 1  | Not-determined  | Genome-fragment | NA    | 0     |
| 510_vs_67322              | [full]   | 2198  | No  | NA   | 3  | 0  | Low-quality     | Genome-fragment | 1.75  | 0     |
| 57_vs_40197               | [full]   | 2857  | No  | NA   | 0  | 0  | Not-determined  | Genome-fragment | NA    | 0     |
| 511_vs_k141_12764         | [full]   | 2199  | No  | NA   | 5  | 0  | Low-quality     | Genome-fragment | 5.72  | 0     |
| 57_vs_40259               | [full]   | 41109 | No  | NA   | 24 | 0  | Genome-fragment | 88.55           | 0     |       |
| 57_vs_40328               | [full]   | 10906 | No  | NA   | 0  | 5  | Not-determined  | Genome-fragment | NA    | 0     |
| 57_vs_40464               | [full]   | 2307  | No  | NA   | 0  | 1  | Not-determined  | Genome-fragment | NA    | 0     |
| 57_vs_28543               | [full]   | 2199  | No  | NA   | 1  | 0  | Low-quality     | Genome-fragment | 2.36  | 0     |
| 57_vs_40552               | [full]   | 1724  | No  | NA   | 1  | 1  | Not-determined  | Genome-fragment | NA    | 0     |
| 57_vs_40557               | [full]   | 2130  | No  | NA   | 0  | 2  | Not-determined  | Genome-fragment | NA    | 0     |
| 57_vs_40574               | [full]   | 2341  | No  | NA   | 0  | 0  | Not-determined  | Genome-fragment | NA    | 0     |
| 512_vs_k141_83867         | [full]   | 2199  | No  | NA   | 0  | 0  | Low-quality     | Genome-fragment | 5.37  | 0     |
| 57_vs_40591               | [full]   | 1736  | No  | NA   | 0  | 0  | Not-determined  | Genome-fragment | NA    | 0     |
| 58_vs_k141_11857          | [full]   | 2199  | No  | NA   | 0  | 2  | Low-quality     | Genome-fragment | 5.08  | 0     |
| 57_vs_40626               | [full]   | 3565  | No  | NA   | 0  | 1  | Not-determined  | Genome-fragment | NA    | 0     |
| 511_extracted_k141_102315 |          | 2200  | No  | NA   | 0  | 1  | Low-quality     | Genome-fragment | 2.77  | 0     |
| 57_vs_40769               | [full]   | 1187  | No  | NA   | 0  | 2  | Not-determined  | Genome-fragment | NA    | 0     |
| 57_vs_40892               | [full]   | 1686  | No  | NA   | 0  | 1  | Not-determined  | Genome-fragment | NA    | 0     |
| 57_vs_40930               | [full]   | 1032  | No  | NA   | 0  | 0  | Not-determined  | Genome-fragment | NA    | 0     |
| 514_vs_k141_48149         | [full]   | 2200  | No  | NA   | 0  | 0  | Low-quality     | Genome-fragment | 5.23  | 0     |
| 51_extracted_k141_22138   |          | 2200  | No  | NA   | 1  | 0  | Low-quality     | Genome-fragment | 5.94  | 0     |
| 57_vs_41098               | [full]   | 60007 | No  | NA   | 32 | 0  | High-quality    | High-quality    | 99.27 | 0     |
| 57_vs_41275               | [full]   | 1259  | No  | NA   | 0  | 0  | Not-determined  | Genome-fragment | NA    | 0     |
| 57_vs_41397               | [full]   | 1677  | No  | NA   | 0  | 2  | Not-determined  | Genome-fragment | NA    | 0     |
| 51_extracted_k141_144203  |          | 2200  | No  | NA   | 0  | 0  | Low-quality     | Genome-fragment | 4.16  | 0     |
| 57_vs_41534               | [full]   | 15804 | No  | NA   | 7  | 0  | Medium-quality  | Genome-fragment | 72.22 | 0     |
| 516_vs_83223              | [full]   | 2200  | No  | NA   | 0  | 2  | Low-quality     | Genome-fragment | 0.61  | 0     |
| 58_vs_k141_29611          | [full]   | 2200  | No  | NA   | 0  | 0  | Low-quality     | Genome-fragment | 1.18  | 0     |
| 57_vs_41610               | [full]   | 15799 | No  | NA   | 0  | 10 | Not-determined  | Genome-fragment | NA    | 0     |
| 58_vs_k141_57275          | [full]   | 2200  | No  | NA   | 0  | 0  | Low-quality     | Genome-fragment | 3.73  | 0     |
| 53_vs_k141_26929          | [full]   | 2201  | No  | NA   | 2  | 0  | Low-quality     | Genome-fragment | 4.69  | 0     |
| 57_vs_67042               | [full]   | 2201  | No  | NA   | 0  | 0  | Low-quality     | Genome-fragment | 5.24  | 0     |
| 57_vs_42051               | [full]   | 2582  | No  | NA   | 0  | 1  | Not-determined  | Genome-fragment | NA    | 0     |
| 56_vs_k141_12787          | [full]   | 2201  | No  | NA   | 1  | 0  | Low-quality     | Genome-fragment | 0.94  | 0     |
| 511_extracted_k141_99114  |          | 2202  | No  | NA   | 0  | 0  | Low-quality     | Genome-fragment | 5.3   | 0     |
| 514_vs_k141_83502         | [full]   | 2202  | No  | NA   | 1  | 0  | Low-quality     | Genome-fragment | 3.18  | 0     |
| 57_vs_42299               | [full]   | 3665  | No  | NA   | 0  | 2  | Not-determined  | Genome-fragment | NA    | 0     |
| 57_vs_42372               | [full]   | 4123  | No  | NA   | 0  | 1  | Not-determined  | Genome-fragment | NA    | 0     |
| 57_vs_42419               | [full]   | 2996  | No  | NA   | 0  | 1  | Not-determined  | Genome-fragment | NA    | 0     |
| 57_vs_42453               | [full]   | 1133  | No  | NA   | 0  | 0  | Not-determined  | Genome-fragment | NA    | 0     |
| 51_vs_k141_120521         | [full]   | 2202  | No  | NA   | 0  | 0  | Low-quality     | Genome-fragment | 4.57  | 0     |
| 51_vs_k141_95466          | [full]   | 2202  | No  | NA   | 0  | 0  | Low-quality     | Genome-fragment | 4.63  | 0     |
| 53_extracted_k141_71895   |          | 2202  | No  | NA   | 0  | 0  | Low-quality     | Genome-fragment | 5.09  | 0     |
| 58_vs_k141_39267          | [full]   | 2202  | Yes | 969  | 1  | 1  | Low-quality     | Genome-fragment | 1.33  | 55.99 |
| 57_vs_42824               | [full]   | 1341  | No  | NA   | 2  | 0  | Not-determined  | Genome-fragment | NA    | 0     |
| 57_vs_42840               | [full]   | 1127  | No  | NA   | 0  | 0  | Not-determined  | Genome-fragment | NA    | 0     |
| 515_vs_36432              | [full]   | 2203  | No  | NA   | 0  | 0  | Low-quality     | Genome-fragment | 1.78  | 0     |
| 57_vs_43330               | [full]   | 1259  | No  | NA   | 0  | 1  | Not-determined  | Genome-fragment | NA    | 0     |
| 57_vs_43385               | [full]   | 1569  | No  | NA   | 0  | 1  | Not-determined  | Genome-fragment | NA    | 0     |
| 57_vs_43515               | [full]   | 1611  | No  | NA   | 0  | 1  | Not-determined  | Genome-fragment | NA    | 0     |
| 57_vs_43529               | [full]   | 34062 | No  | NA   | 17 | 0  | Medium-quality  | Genome-fragment | 69.5  | 0     |
| 57_vs_43538               | [full]   | 1106  | No  | NA   | 0  | 0  | Not-determined  | Genome-fragment | NA    | 0     |
| 57_vs_43545               | [full]   | 14591 | No  | NA   | 0  | 6  | Not-determined  | Genome-fragment | NA    | 0     |
| 58_vs_k141_17236          | [full]   | 2203  | No  | NA   | 0  | 3  | Low-quality     | Genome-fragment | 6.24  | 0     |
| 57_vs_43601               | [full]   | 2154  | No  | NA   | 0  | 2  | Not-determined  | Genome-fragment | NA    | 0     |
| 57_vs_43832               | [full]   | 7929  | No  | NA   | 0  | 7  | Not-determined  | Genome-fragment | NA    | 0     |
| 517_vs_k141_679           | [full]   | 2204  | Yes | 1766 | 1  | 1  | Low-quality     | Genome-fragment | 1.06  | 19.87 |
| 57_vs_43876               | [full]   | 4950  | No  | NA   | 0  | 0  | Not-determined  | Genome-fragment | NA    | 0     |
| 59_extracted_k141_89204   |          | 2204  | No  | NA   | 0  | 3  | Low-quality     | Genome-fragment | 1.45  | 0     |
| 51_vs_k141_118193         | [full]   | 4204  | No  | NA   | 0  | 0  | Low-quality     | Genome-fragment | 5.61  | 0     |
| 57_vs_44012               | [full]   | 3099  | No  | NA   | 0  | 2  | Not-determined  | Genome-fragment | NA    | 0     |
| 57_extracted_53474        |          | 2204  | No  | NA   | 0  | 0  | Low-quality     | Genome-fragment | 2.9   | 0     |
| 57_vs_44079               | [full]   | 1557  | No  | NA   | 0  | 0  | Not-determined  | Genome-fragment | NA    | 0     |
| 57_vs_44106               | [full]   | 3742  | No  | NA   | 0  | 1  | Not-determined  | Genome-fragment | NA    | 0     |
| 57_vs_44151               | [full]   | 2522  | No  | NA   | 0  | 2  | Not-determined  | Genome-fragment | NA    | 0     |
| 57_vs_44265               | [full]   | 2586  | No  | NA   | 0  | 1  | Not-determined  | Genome-fragment | NA    | 0     |
| 57_vs_44301               | [full]   | 1260  | No  | NA   | 0  | 1  | Not-determined  | Genome-fragment | NA    | 0     |
| 58_extracted_k141_153132  |          | 2204  | No  | NA   | 0  | 0  | Low-quality     | Genome-fragment | 2.24  | 0     |
| 517_vs_k141_145970        | [full]   | 2205  | No  | NA   | 0  | 0  | Low-quality     | Genome-fragment | 5.44  | 0     |
| 57_vs_44423               | [full]   | 3343  | No  | NA   | 0  | 3  | Not-determined  | Genome-fragment | NA    | 0     |
| 511_vs_k141_12403         | [full]   | 2205  | No  | NA   | 0  | 0  | Low-quality     | Genome-fragment | 6.27  | 0     |
| 57_vs_44612               | [full]   | 3263  | No  | NA   | 0  | 2  | Not-determined  | Genome-fragment | NA    | 0     |
| 57_vs_44629               | [full]   | 3886  | No  | NA   | 0  | 1  | Not-determined  | Genome-fragment | NA    | 0     |
| 51_extracted_k141_113884  |          | 2205  | No  | NA   | 1  | 0  | Low-quality     | Genome-fragment | 3.74  | 0     |
| 516_extracted_89075       |          | 2205  | No  | NA   | 0  | 2  | Low-quality     | Genome-fragment | 2.33  | 0     |
| 516_vs_29235              | [full]   | 2205  | No  | NA   | 0  | 0  | Low-quality     | Genome-fragment | 2.99  | 0     |
| 512_extracted_k141_82360  |          | 2205  | No  | NA   | 0  | 0  | Low-quality     | Genome-fragment | 3.44  | 0     |
| 58_vs_k141_13002          | [full]   | 2205  | No  | NA   | 0  | 2  | Low-quality     | Genome-fragment | 0.74  | 0     |
| 517_extracted_k141_29547  |          | 2206  | No  | NA   | 4  | 0  | Low-quality     | Genome-fragment | 7.27  | 0     |
| 55_vs_k141_109426         | [t2gene] | 2206  | No  | NA   | 1  | 0  | Low-quality     | Genome-fragment | 4.59  | 0     |
| 57_vs_45505               | [full]   | 2340  | No  | NA   | 0  | 0  | Not-determined  | Genome-fragment | NA    | 0     |
| 516_vs_8295               | [full]   | 2206  | No  | NA   | 0  | 1  | Low-quality     | Genome-fragment | 5.53  | 0     |
| 516_vs_154803             | [full]   | 2206  | No  | NA   | 0  | 0  | Low-quality     | Genome-fragment | 3.94  | 0     |
| 510_vs_15894              | [full]   | 2206  | No  | NA   | 0  | 3  | Low-quality     | Genome-fragment | 0.68  | 0     |
| 57_vs_45605               | [full]   | 1287  | No  | NA   | 0  | 1  | Not-determined  | Genome-fragment | NA    | 0     |
| 57_vs_45635               | [full]   | 20669 | No  | NA   | 0  | 8  | Not-determined  | Genome-fragment | NA    | 0     |
| 57_vs_45866               | [full]   | 2079  | No  | NA   | 0  | 1  | Not-determined  | Genome-fragment | NA    | 0     |
| 57_vs_45904               | [full]   | 1976  | No  | NA   | 0  | 2  | Not-determined  | Genome-fragment | NA    | 0     |
| 57_vs_45965               | [full]   | 2431  | No  | NA   | 0  | 1  | Not-determined  | Genome-fragment | NA    | 0     |
| 517_vs_k141_135810        | [full]   | 2207  | No  | NA   | 0  | 0  | Low-quality     | Genome-fragment | 2.7   | 0     |
| 513_vs_129760             | [full]   | 2207  | No  | NA   | 0  | 0  | Low-quality     | Genome-fragment | 4.2   | 0     |
| 57_vs_46051               | [full]   | 2110  | No  | NA   | 0  | 2  | Not-determined  | Genome-fragment | NA    | 0     |
| 57_vs_46064               | [full]   | 2184  | No  | NA   | 0  | 0  | Not-determined  | Genome-fragment | NA    | 0     |
| 55_extracted_k141_59557   |          | 2207  | No  | NA   | 2  | 0  | Low-quality     | Genome-fragment | 5.43  | 0     |
| 57_vs_46145               | [full]   | 1664  | No  | NA   | 0  | 0  | Not-determined  | Genome-fragment | NA    | 0     |
| 57_vs_46182               | [full]   | 1907  | No  | NA   | 0  | 0  | Not-determined  | Genome-fragment | NA    | 0     |
| 55_vs_k141_12605          | [full]   | 2207  | No  | NA   | 1  | 0  | Low-quality     | Genome-fragment | 4.96  | 0     |
| 57_vs_14145               | [full]   | 2207  | No  | NA   | 0  | 0  | Low-quality     | Genome-fragment | 6.01  | 0     |
| 57_vs_46270               | [full]   | 1835  | No  | NA   | 0  | 0  | Not-determined  | Genome-fragment | NA    | 0     |
| 512_extracted_k141_1695   |          | 2207  | No  | NA   | 0  | 0  | Low-quality     | Genome-fragment | 3.16  | 0     |
| 58_extracted_k141_2360    |          | 2207  | No  | NA   | 0  | 2  | Low-quality     | Genome-fragment | 4.21  | 0     |
| 58_extracted_k141_39078   |          | 2207  | No  | NA   | 0  | 1  | Low-quality     | Genome-fragment | 3.12  | 0     |
| 57_vs_46406               | [full]   | 2626  | No  | NA   | 0  | 2  | Not-determined  | Genome-fragment | NA    | 0     |
| 57_vs_46436               | [full]   | 5205  | No  | NA   | 0  | 2  | Not-determined  | Genome-fragment | NA    | 0     |
| 517_vs_k141_147350        | [full]   | 2208  | Yes | 1665 | 1  | 1  | Low-quality     | Genome-fragment | 2.06  | 24.59 |
| 57_vs_46680               | [full]   | 2680  | No  | NA   | 0  | 2  | Not-determined  | Genome-fragment | NA    | 0     |
| 57_vs_46733               | [full]   | 2928  | No  | NA   | 0  | 2  | Not-determined  | Genome-fragment | NA    | 0     |
| 57_vs_46759               | [full]   | 4871  | No  | NA   | 0  | 0  | Not-determined  | Genome-fragment | NA    | 0     |
| 57_vs_46769               | [full]   | 2750  | No  | NA   | 0  | 2  | Not-determined  | Genome-fragment | NA    | 0     |
| 57_vs_46787               | [full]   | 3051  | No  | NA   | 0  | 1  | Not-determined  | Genome-fragment | NA    | 0     |
| 55_extracted_k141_107397  |          | 2208  | No  | NA   | 0  | 0  | Low-quality     | Genome-fragment | 2.68  | 0     |
| 57_vs_46950               | [full]   | 1460  | No  | NA   | 0  | 0  | Not-determined  | Genome-fragment | NA    | 0     |
| 57_vs_46987               | [full]   | 3     |     |      |    |    |                 |                 |       |       |



|                           |          |       |     |    |       |    |                |                 |              |       |       |
|---------------------------|----------|-------|-----|----|-------|----|----------------|-----------------|--------------|-------|-------|
| 57_vs_48671               | [full]   | 1189  | No  | NA | 0     | 0  | Not-determined | Genome-fragment | NA           | 0     | 0     |
| 57_vs_48678               | [full]   | 2359  | No  | NA | 0     | 0  | Not-determined | Genome-fragment | NA           | 0     | 0     |
| 517_vs_k141_9575          | [full]   | 2212  | No  | NA | 2     | 0  | Low-quality    | Genome-fragment | NA           | 6.95  | 0     |
| 57_vs_48708               | [full]   | 68692 | No  | NA | 25    | 4  | High-quality   | High-quality    |              | 100   | 0     |
| 513_extracted_133535      |          | 2212  | No  | NA | 1     | 0  | Low-quality    | Genome-fragment | NA           | 3.64  | 0     |
| 57_vs_48832               | [full]   | 37951 | No  | NA | 28    | 0  | High-quality   | High-quality    |              | 91.91 | 0     |
| 55_vs_k141_67527          | [full]   | 2212  | No  | NA | 0     | 0  | Low-quality    | Genome-fragment | NA           | 4.46  | 0     |
| 55_vs_k141_59336          | [full]   | 2212  | No  | NA | 0     | 0  | Low-quality    | Genome-fragment | NA           | 1.98  | 0     |
| 57_vs_48963               | [full]   | 1356  | No  | NA | 0     | 0  | Not-determined | Genome-fragment | NA           | 5.98  | 0     |
| 55_vs_k141_98907          | [H2gene] | 2212  | No  | NA | 2     | 0  | Low-quality    | Genome-fragment | NA           | 6.43  | 0     |
| 57_vs_49033               | [full]   | 1370  | No  | NA | 0     | 0  | Not-determined | Genome-fragment | NA           | 5.26  | 0     |
| 510_extracted_101942      |          | 2212  | No  | NA | 0     | 0  | Low-quality    | Genome-fragment | NA           | 5.26  | 0     |
| 57_vs_49195               | [full]   | 1432  | No  | NA | 1     | 2  | Not-determined | Genome-fragment | NA           | 0     | 0     |
| 57_vs_49278               | [full]   | 5581  | No  | NA | 0     | 3  | Not-determined | Genome-fragment | NA           | 0     | 0     |
| 57_vs_49426               | [full]   | 57556 | Yes | NA | 34483 | 13 | 22             | High-quality    | High-quality | 98.72 | 40.09 |
| 57_vs_49440               | [full]   | 1773  | No  | NA | 0     | 0  | Not-determined | Genome-fragment | NA           | 0     | 0     |
| 512_vs_k141_181512        | [full]   | 2212  | No  | NA | 0     | 0  | Low-quality    | Genome-fragment | NA           | 4.91  | 0     |
| 511_vs_k141_11294         | [full]   | 2213  | No  | NA | 0     | 1  | Low-quality    | Genome-fragment | NA           | 4.77  | 0     |
| 52_vs_k141_124028         | [full]   | 2212  | No  | NA | 0     | 0  | Low-quality    | Genome-fragment | NA           | 2.53  | 0     |
| 57_vs_61844               | [H2gene] | 2213  | No  | NA | 1     | 0  | Low-quality    | Genome-fragment | NA           | 4.56  | 0     |
| 57_vs_49694               | [full]   | 1995  | No  | NA | 0     | 0  | Not-determined | Genome-fragment | NA           | 5.98  | 0     |
| 516_extracted_49221       |          | 2213  | No  | NA | 2     | 0  | Low-quality    | Genome-fragment | NA           | 5.98  | 0     |
| 57_vs_50036               | [full]   | 1740  | No  | NA | 0     | 0  | Not-determined | Genome-fragment | NA           | 5.78  | 0     |
| 511_vs_k141_33623         | [full]   | 2214  | No  | NA | 1     | 0  | Low-quality    | Genome-fragment | NA           | 5.78  | 0     |
| 57_vs_50194               | [full]   | 38824 | No  | NA | 7     | 2  | High-quality   | High-quality    |              | 98.16 | 0     |
| 55_vs_k141_144516         | [full]   | 2214  | No  | NA | 1     | 0  | Low-quality    | Genome-fragment | NA           | 5.65  | 0     |
| 57_vs_50438               | [full]   | 2467  | No  | NA | 0     | 0  | Not-determined | Genome-fragment | NA           | 4.8   | 0     |
| 57_vs_55723               | [full]   | 2214  | No  | NA | 0     | 1  | Low-quality    | Genome-fragment | NA           | 6.03  | 0     |
| 57_vs_112393              | [full]   | 2214  | No  | NA | 0     | 0  | Low-quality    | Genome-fragment | NA           | 6.03  | 0     |
| 57_vs_50489               | [full]   | 1482  | No  | NA | 0     | 0  | Not-determined | Genome-fragment | NA           | 4.8   | 0     |
| 57_vs_50588               | [full]   | 1276  | No  | NA | 0     | 0  | Not-determined | Genome-fragment | NA           | 4.8   | 0     |
| 57_vs_50636               | [full]   | 1505  | No  | NA | 0     | 0  | Not-determined | Genome-fragment | NA           | 4.8   | 0     |
| 58_vs_k141_94622          | [full]   | 2214  | No  | NA | 0     | 0  | Low-quality    | Genome-fragment | NA           | 1.95  | 0     |
| 57_vs_50875               | [full]   | 3761  | No  | NA | 0     | 0  | Not-determined | Genome-fragment | NA           | 1.47  | 0     |
| 513_extracted_140926      |          | 2215  | No  | NA | 0     | 2  | Low-quality    | Genome-fragment | NA           | 1.47  | 0     |
| 57_vs_50917               | [full]   | 2271  | No  | NA | 0     | 0  | Not-determined | Genome-fragment | NA           | 3.61  | 0     |
| 514_extracted_k141_116714 |          | 2215  | No  | NA | 0     | 0  | Low-quality    | Genome-fragment | NA           | 2.42  | 0     |
| 512_extracted_k141_28921  |          | 2215  | No  | NA | 0     | 0  | Low-quality    | Genome-fragment | NA           | 3.61  | 0     |
| 57_vs_51000               | [full]   | 4884  | No  | NA | 6     | 0  | Not-determined | Genome-fragment | NA           | 2.31  | 0     |
| 52_extracted_k141_13731   |          | 2215  | No  | NA | 0     | 0  | Low-quality    | Genome-fragment | NA           | 2.31  | 0     |
| 57_vs_51190               | [full]   | 1024  | No  | NA | 0     | 1  | Not-determined | Genome-fragment | NA           | 2.73  | 0     |
| 59_vs_k141_16882          | [H2gene] | 2216  | No  | NA | 0     | 0  | Low-quality    | Genome-fragment | NA           | 51.81 | 0     |
| 57_vs_51332               | [full]   | 47629 | No  | NA | 2     | 19 | Medium-quality | Genome-fragment | NA           | 0     | 0     |
| 57_vs_51365               | [full]   | 2666  | No  | NA | 0     | 0  | Not-determined | Genome-fragment | NA           | 4.19  | 0     |
| 57_vs_51393               | [full]   | 1451  | No  | NA | 0     | 2  | Not-determined | Genome-fragment | NA           | 1.19  | 0     |
| 511_extracted_k141_65798  |          | 2216  | No  | NA | 0     | 0  | Low-quality    | Genome-fragment | NA           | 1.19  | 0     |
| 511_vs_k141_70253         | [full]   | 2216  | No  | NA | 0     | 1  | Low-quality    | Genome-fragment | NA           | 1.83  | 0     |
| 57_vs_51603               | [full]   | 1452  | No  | NA | 0     | 0  | Not-determined | Genome-fragment | NA           | 3.64  | 0     |
| 57_vs_51761               | [full]   | 1096  | No  | NA | 1     | 1  | Not-determined | Genome-fragment | NA           | 2.46  | 0     |
| 513_vs_17708              | [full]   | 2216  | No  | NA | 0     | 2  | Low-quality    | Genome-fragment | NA           | 4.11  | 0     |
| 57_vs_23348               | [full]   | 2216  | No  | NA | 2     | 0  | Low-quality    | Genome-fragment | NA           | 4.6   | 0     |
| 58_extracted_k141_145300  |          | 2216  | No  | NA | 0     | 0  | Low-quality    | Genome-fragment | NA           | 3.64  | 0     |
| 51_extracted_k141_159546  |          | 2217  | No  | NA | 0     | 1  | Low-quality    | Genome-fragment | NA           | 2.73  | 0     |
| 511_extracted_k141_29077  |          | 2218  | No  | NA | 1     | 0  | Low-quality    | Genome-fragment | NA           | 4.6   | 0     |
| 514_extracted_k141_36715  |          | 2218  | No  | NA | 2     | 0  | Low-quality    | Genome-fragment | NA           | 7.19  | 0     |
| 51_extracted_k141_9745    |          | 2218  | No  | NA | 1     | 0  | Low-quality    | Genome-fragment | NA           | 4.62  | 0     |
| 53_vs_k141_100531         | [full]   | 2218  | No  | NA | 3     | 0  | Low-quality    | Genome-fragment | NA           | 3.8   | 0     |
| 53_vs_k141_31295          | [full]   | 2218  | No  | NA | 0     | 2  | Low-quality    | Genome-fragment | NA           | 2.64  | 0     |
| 57_vs_52034               | [full]   | 3908  | No  | NA | 3     | 0  | Not-determined | Genome-fragment | NA           | 1.56  | 0     |
| 57_vs_17392               | [full]   | 2218  | No  | NA | 0     | 1  | Low-quality    | Genome-fragment | NA           | 7.22  | 0     |
| 54_extracted_30455        |          | 2218  | No  | NA | 3     | 0  | Low-quality    | Genome-fragment | NA           | 5.29  | 0     |
| 57_vs_52095               | [full]   | 4144  | No  | NA | 4     | 0  | Not-determined | Genome-fragment | NA           | 7.32  | 0     |
| 514_vs_k141_29434         | [full]   | 2219  | No  | NA | 6     | 0  | Low-quality    | Genome-fragment | NA           | 0     | 0     |
| 57_vs_53065               | [full]   | 1295  | No  | NA | 0     | 2  | Not-determined | Genome-fragment | NA           | 1.12  | 0     |
| 57_vs_53134               | [full]   | 3311  | No  | NA | 0     | 0  | Not-determined | Genome-fragment | NA           | 3.49  | 0     |
| 51_extracted_k141_47543   |          | 2219  | No  | NA | 0     | 1  | Low-quality    | Genome-fragment | NA           | 3.12  | 0     |
| 55_vs_k141_89280          | [full]   | 2219  | No  | NA | 0     | 1  | Low-quality    | Genome-fragment | NA           | 0     | 0     |
| 516_vs_14430              | [full]   | 2219  | No  | NA | 0     | 1  | Low-quality    | Genome-fragment | NA           | 0     | 0     |
| 57_vs_53456               | [full]   | 1662  | No  | NA | 1     | 0  | Not-determined | Genome-fragment | NA           | 0     | 0     |
| 57_vs_53591               | [full]   | 2175  | No  | NA | 0     | 0  | Not-determined | Genome-fragment | NA           | 0     | 0     |
| 57_vs_53604               | [full]   | 1719  | No  | NA | 0     | 0  | Not-determined | Genome-fragment | NA           | 0     | 0     |
| 57_vs_53609               | [full]   | 1286  | No  | NA | 0     | 0  | Not-determined | Genome-fragment | NA           | 0     | 0     |
| 57_vs_53921               | [full]   | 2501  | No  | NA | 0     | 1  | Not-determined | Genome-fragment | NA           | 0     | 0     |
| 57_vs_53926               | [full]   | 1718  | No  | NA | 0     | 1  | Not-determined | Genome-fragment | NA           | 0.81  | 0     |
| 58_vs_k141_207749         | [full]   | 2219  | No  | NA | 2     | 0  | Low-quality    | Genome-fragment | NA           | 4.05  | 0     |
| 55_vs_k141_117897         | [full]   | 2220  | No  | NA | 1     | 0  | Low-quality    | Genome-fragment | NA           | 6.07  | 0     |
| 58_vs_k141_126596         | [H2gene] | 2220  | No  | NA | 1     | 0  | Low-quality    | Genome-fragment | NA           | 2.74  | 0     |
| 55_vs_k141_94141          | [full]   | 2221  | No  | NA | 2     | 0  | Low-quality    | Genome-fragment | NA           | 0     | 0     |
| 57_vs_54146               | [full]   | 5313  | No  | NA | 4     | 0  | Not-determined | Genome-fragment | NA           | 0     | 0     |
| 57_vs_54151               | [full]   | 2625  | No  | NA | 0     | 1  | Not-determined | Genome-fragment | NA           | 5.32  | 0     |
| 57_vs_54249               | [full]   | 4027  | No  | NA | 0     | 3  | Not-determined | Genome-fragment | NA           | 2.09  | 0     |
| 55_vs_k141_7931           | [full]   | 2221  | No  | NA | 0     | 0  | Low-quality    | Genome-fragment | NA           | 4.27  | 0     |
| 57_vs_54507               | [full]   | 1604  | No  | NA | 0     | 0  | Not-determined | Genome-fragment | NA           | 3.42  | 0     |
| 516_vs_28039              | [full]   | 2221  | No  | NA | 1     | 0  | Low-quality    | Genome-fragment | NA           | 1.44  | 0     |
| 516_vs_138032             | [full]   | 2221  | No  | NA | 0     | 0  | Low-quality    | Genome-fragment | NA           | 5.28  | 0     |
| 57_vs_54738               | [full]   | 3099  | No  | NA | 0     | 2  | Not-determined | Genome-fragment | NA           | 5.93  | 0     |
| 510_vs_67070              | [full]   | 2221  | No  | NA | 0     | 2  | Low-quality    | Genome-fragment | NA           | 79.12 | 0     |
| 56_extracted_k141_131538  |          | 2222  | No  | NA | 0     | 3  | Low-quality    | Genome-fragment | NA           | 0     | 0     |
| 516_vs_72852              | [full]   | 2222  | No  | NA | 0     | 0  | Low-quality    | Genome-fragment | NA           | 0     | 0     |
| 510_vs_58406              | [full]   | 2222  | No  | NA | 3     | 0  | Low-quality    | Genome-fragment | NA           | 0     | 0     |
| 57_vs_54974               | [full]   | 1558  | No  | NA | 0     | 1  | Not-determined | Genome-fragment | NA           | 0     | 0     |
| 57_vs_55031               | [full]   | 36725 | No  | NA | 11    | 0  | Medium-quality | Genome-fragment | NA           | 0     | 0     |
| 57_vs_55097               | [full]   | 1789  | No  | NA | 0     | 2  | Not-determined | Genome-fragment | NA           | 0.69  | 0     |
| 517_vs_k141_24010         | [full]   | 2223  | No  | NA | 0     | 2  | Low-quality    | Genome-fragment | NA           | 1.13  | 0     |
| 59_vs_k141_63215          | [full]   | 2223  | No  | NA | 0     | 0  | Low-quality    | Genome-fragment | NA           | 1.09  | 0     |
| 53_vs_k141_81536          | [full]   | 2223  | No  | NA | 1     | 0  | Low-quality    | Genome-fragment | NA           | 1.81  | 0     |
| 57_vs_66486               | [full]   | 2223  | No  | NA | 0     | 2  | Low-quality    | Genome-fragment | NA           | 88.89 | 0     |
| 57_vs_55409               | [full]   | 31512 | No  | NA | 12    | 1  | Medium-quality | Genome-fragment | NA           | 74.98 | 0     |
| 57_vs_114775              | [full]   | 2223  | No  | NA | 0     | 0  | Not-determined | Genome-fragment | NA           | 0     | 0     |
| 57_vs_55513               | [full]   | 1159  | No  | NA | 0     | 0  | Not-determined | Genome-fragment | NA           | 0     | 0     |
| 57_vs_55526               | [full]   | 28778 | No  | NA | 13    | 0  | Medium-quality | Genome-fragment | NA           | 0     | 0     |
| 57_vs_55530               | [full]   | 1914  | No  | NA | 0     | 1  | Not-determined | Genome-fragment | NA           | 0     | 0     |
| 57_vs_55565               | [full]   | 3994  | No  | NA | 0     | 0  | Not-determined | Genome-fragment | NA           | 0     | 0     |
| 57_vs_55624               | [full]   | 2510  | No  | NA | 0     | 3  | Not-determined | Genome-fragment | NA           | 0     | 0     |
| 57_vs_55647               | [full]   | 1008  | No  | NA | 0     | 1  | Not-determined | Genome-fragment | NA           | 0     | 0     |
| 57_vs_55685               | [full]   | 5303  | No  | NA | 0     | 2  | Not-determined | Genome-fragment | NA           | 0     | 0     |
| 512_vs_k141_98669         | [full]   | 2223  | No  | NA | 0     | 2  | Low-quality    | Genome-fragment | NA           | 2.66  | 0     |
| 512_vs_k141_38294         | [full]   | 2223  | No  | NA | 5     | 0  | Low-quality    | Genome-fragment | NA           | 6.14  | 0     |
| 58_vs_k141_175680         | [full]   | 2223  | No  | NA | 0     | 0  | Low-quality    | Genome-fragment | NA           | 2.87  | 0     |
| 59_vs_k141_74858          | [full]   | 2224  | No  | NA | 0     | 0  | Low-quality    | Genome-fragment | NA           | 0     | 0     |
| 57_vs_55926               | [full]   | 11566 | No  | NA | 0     | 1  | Not-determined | Genome-fragment | NA           | 0     | 0     |
| 57_vs_56176               | [full]   | 4608  | No  | NA | 0     | 3  | Not-determined | Genome-fragment | NA           | 3.35  | 0     |
| 57_vs_56260               | [full]   | 2125  | No  | NA | 0     | 1  | Low-quality    | Genome-fragment | NA           | 4.4   | 0     |
| 513_vs_67616              | [full]   | 2224  | No  | NA | 0     | 0  | Low-quality    | Genome-fragment | NA           | 0     | 0     |
| 52_extracted_k141_93180   |          | 2224  | No  | NA | 0     | 2  | Not-determined | Genome-fragment | NA           | 0     | 0     |
| 57_vs_56322               | [full]   | 2286  | No  | NA | 0     | 0  | Not-determined | Genome-fragment | NA           | 0     | 0     |
| 57_vs_56335               | [full]   | 2848  | No  | NA | 0     | 0  | Not-determined | Genome-fragment | NA           | 100   | 0     |
| 57_vs_56529               | [full]   | 32265 | No  | NA | 12    | 1  | High-quality   | High-quality    |              | 14.98 | 0     |
| 514_vs_k141_114781        | [full]   | 2225  | No  | NA | 0     | 0  | Low-quality    | Genome-fragment | NA           | 6.36  | 0     |
| 55_vs_k141_142708         | [full]   | 2225  | No  | NA | 2     | 0  | Low-quality    | Genome-fragment | NA           | 5.35  | 0     |
| 57_vs_56608               | [full]   | 2455  | No  | NA | 0     | 0  | Not-determined | Genome-fragment | NA           | 1.9   | 0     |
| 516_extracted_119190      |          | 2225  | No  | NA | 0     | 1  | Low-quality    | Genome-fragment | NA           | 5.36  | 0     |
| 516_vs_98148              | [full]   | 2225  | No  | NA | 0     | 0  | Low-quality    | Genome-fragment | NA           | 3.05  | 0     |
| 512_vs_k141_168161        | [full]   | 2225  | No  | NA | 3     | 0  | Low-quality    | Genome-fragment | NA           | 7.32  | 0     |
| 511_vs_k141_87692         | [full]   | 2226  | No  | NA | 0     | 0  | Low-quality    | Genome-fragment | NA           | 4.03  | 0     |
| 57_vs_57152               | [full]   | 1555  | No  | NA | 0     | 1  | Not-determined | Genome-fragment | NA           | 3.44  | 0     |
| 514_extracted_k141_9242   |          | 2226  | No  | NA | 6     | 0  | Low-quality    | Genome-fragment | NA           | 2.44  | 0     |
| 514_vs_k141_40724         | [full]   | 2226  | No  | NA | 0     | 0  | Low-quality    | Genome-fragment | NA           | 5.21  | 0     |
| 514_vs_k141_67440         | [H2gene] | 2226  | No  | NA | 2     | 0  | Low-quality    | Genome-fragment | NA           | 0     | 0     |
| 57_vs_57428               | [full]   | 1105  | No  | NA |       |    |                |                 |              |       |       |



|                           |           |       |     |      |   |    |                |                 |    |       |
|---------------------------|-----------|-------|-----|------|---|----|----------------|-----------------|----|-------|
| 57_vs_60779               | [full]    | 1247  | No  | NA   | 0 | 1  | Not-determined | Genome-fragment | NA | 0     |
| 55_vs_k141_36168          | [full]    | 2230  | No  | NA   | 0 | 0  | Low-quality    | Genome-fragment | NA | 4.28  |
| 57_vs_60802               | [full]    | 3039  | No  | NA   | 0 | 0  | Not-determined | Genome-fragment | NA | 0     |
| 57_vs_39422               | [full]    | 2230  | No  | NA   | 0 | 0  | Low-quality    | Genome-fragment | NA | 2.94  |
| 57_vs_38906               | [full]    | 2230  | No  | NA   | 0 | 0  | Low-quality    | Genome-fragment | NA | 4.85  |
| 512_vs_k141_144541        | [full]    | 2230  | No  | NA   | 3 | 0  | Low-quality    | Genome-fragment | NA | 5.75  |
| 57_vs_60904               | [full]    | 4615  | No  | NA   | 0 | 2  | Not-determined | Genome-fragment | NA | 0     |
| 57_vs_60947               | [full]    | 3104  | No  | NA   | 0 | 1  | Not-determined | Genome-fragment | NA | 0     |
| 514_vs_k141_93104         | [full]    | 2231  | No  | NA   | 0 | 0  | Low-quality    | Genome-fragment | NA | 1.01  |
| 57_vs_44511               | [full]    | 2231  | No  | NA   | 0 | 0  | Low-quality    | Genome-fragment | NA | 4.89  |
| 57_vs_61147               | [full]    | 2915  | No  | NA   | 0 | 0  | Not-determined | Genome-fragment | NA | 0     |
| 57_vs_61162               | [full]    | 4344  | No  | NA   | 0 | 0  | Not-determined | Genome-fragment | NA | 0     |
| 512_extracted_k141_173600 | [full]    | 2231  | No  | NA   | 0 | 0  | Low-quality    | Genome-fragment | NA | 1.75  |
| 57_vs_61262               | [full]    | 1381  | No  | NA   | 0 | 0  | Not-determined | Genome-fragment | NA | 0     |
| 512_vs_k141_8422          | [full]    | 2231  | No  | NA   | 0 | 1  | Low-quality    | Genome-fragment | NA | 1.41  |
| 57_vs_61286               | [full]    | 7451  | No  | NA   | 4 | 0  | Not-determined | Genome-fragment | NA | 0     |
| 58_vs_k141_167876         | [full]    | 2231  | No  | NA   | 1 | 0  | Low-quality    | Genome-fragment | NA | 3.93  |
| 59_vs_k141_86612          | [In2gene] | 2232  | No  | NA   | 1 | 0  | Low-quality    | Genome-fragment | NA | 5.37  |
| 57_vs_40736               | [full]    | 2232  | No  | NA   | 0 | 0  | Low-quality    | Genome-fragment | NA | 5.25  |
| 512_vs_k141_161882        | [full]    | 2232  | No  | NA   | 2 | 1  | Low-quality    | Genome-fragment | NA | 3.63  |
| 511_vs_k141_4009          | [full]    | 2233  | No  | NA   | 0 | 0  | Low-quality    | Genome-fragment | NA | 1.82  |
| 57_vs_61522               | [full]    | 3993  | No  | NA   | 0 | 0  | Not-determined | Genome-fragment | NA | 0     |
| 53_vs_k141_112713         | [full]    | 2233  | No  | NA   | 0 | 0  | Low-quality    | Genome-fragment | NA | 2.56  |
| 57_vs_61548               | [full]    | 1198  | No  | NA   | 0 | 1  | Not-determined | Genome-fragment | NA | 0     |
| 57_vs_61550               | [full]    | 2204  | No  | NA   | 0 | 2  | Not-determined | Genome-fragment | NA | 0     |
| 57_vs_61601               | [full]    | 1745  | No  | NA   | 0 | 2  | Not-determined | Genome-fragment | NA | 0     |
| 57_vs_61610               | [full]    | 3111  | Yes | 1870 | 1 | 1  | Not-determined | Genome-fragment | NA | 39.89 |
| 55_vs_k141_137943         | [full]    | 2233  | No  | NA   | 1 | 0  | Low-quality    | Genome-fragment | NA | 4.78  |
| 57_vs_61866               | [full]    | 1729  | No  | NA   | 0 | 0  | Not-determined | Genome-fragment | NA | 0     |
| 57_vs_62025               | [full]    | 1207  | No  | NA   | 0 | 1  | Not-determined | Genome-fragment | NA | 0     |
| 57_vs_62056               | [full]    | 2342  | No  | NA   | 0 | 1  | Not-determined | Genome-fragment | NA | 0     |
| 57_vs_62060               | [full]    | 1973  | No  | NA   | 0 | 1  | Not-determined | Genome-fragment | NA | 0     |
| 512_vs_k141_25328         | [full]    | 2233  | No  | NA   | 1 | 0  | Low-quality    | Genome-fragment | NA | 2.59  |
| 57_vs_62068               | [full]    | 1600  | No  | NA   | 0 | 0  | Not-determined | Genome-fragment | NA | 0     |
| 57_vs_62125               | [full]    | 1717  | No  | NA   | 0 | 0  | Not-determined | Genome-fragment | NA | 0     |
| 57_vs_62158               | [full]    | 1247  | No  | NA   | 0 | 1  | Not-determined | Genome-fragment | NA | 1.4   |
| 57_vs_62182               | [full]    | 1292  | No  | NA   | 0 | 0  | Not-determined | Genome-fragment | NA | 0     |
| 57_vs_62304               | [full]    | 1022  | No  | NA   | 0 | 1  | Not-determined | Genome-fragment | NA | 0     |
| 58_vs_k141_105613         | [full]    | 2233  | No  | NA   | 0 | 0  | Low-quality    | Genome-fragment | NA | 3.58  |
| 57_vs_62458               | [full]    | 2245  | No  | NA   | 0 | 0  | Not-determined | Genome-fragment | NA | 0     |
| 51_vs_k141_54376          | [full]    | 2234  | No  | NA   | 1 | 0  | Low-quality    | Genome-fragment | NA | 2.16  |
| 51_vs_k141_117776         | [full]    | 2234  | No  | NA   | 0 | 0  | Low-quality    | Genome-fragment | NA | 1.4   |
| 516_vs_127690             | [full]    | 2234  | No  | NA   | 0 | 0  | Low-quality    | Genome-fragment | NA | 2.04  |
| 58_extracted_k141_8338    | [full]    | 2234  | No  | NA   | 0 | 0  | Low-quality    | Genome-fragment | NA | 3.61  |
| 57_vs_101689              | [full]    | 2235  | No  | NA   | 0 | 0  | Low-quality    | Genome-fragment | NA | 4.24  |
| 57_vs_62677               | [full]    | 1846  | No  | NA   | 0 | 0  | Not-determined | Genome-fragment | NA | 0     |
| 57_vs_62692               | [full]    | 3010  | No  | NA   | 0 | 0  | Not-determined | Genome-fragment | NA | 0     |
| 57_vs_62733               | [full]    | 1246  | No  | NA   | 0 | 0  | Not-determined | Genome-fragment | NA | 0     |
| 516_extracted_7798        | [full]    | 2235  | No  | NA   | 0 | 0  | Low-quality    | Genome-fragment | NA | 3.48  |
| 57_vs_62775               | [full]    | 7082  | No  | NA   | 0 | 2  | Not-determined | Genome-fragment | NA | 0     |
| 517_extracted_k141_63065  | [full]    | 2236  | No  | NA   | 3 | 0  | Low-quality    | Genome-fragment | NA | 1.3   |
| 517_vs_k141_47500         | [In2gene] | 2236  | No  | NA   | 0 | 0  | Low-quality    | Genome-fragment | NA | 2.73  |
| 511_extracted_k141_60637  | [full]    | 2236  | No  | NA   | 1 | 0  | Low-quality    | Genome-fragment | NA | 5.4   |
| 511_vs_k141_87339         | [full]    | 2236  | No  | NA   | 0 | 0  | Low-quality    | Genome-fragment | NA | 3.92  |
| 57_vs_8105                | [full]    | 2236  | No  | NA   | 1 | 0  | Low-quality    | Genome-fragment | NA | 2.63  |
| 57_vs_71310               | [full]    | 2236  | No  | NA   | 1 | 0  | Low-quality    | Genome-fragment | NA | 2.86  |
| 517_extracted_k141_6122   | [full]    | 2237  | Yes | 1108 | 1 | 1  | Low-quality    | Genome-fragment | NA | 0.4   |
| 57_vs_63203               | [full]    | 1493  | No  | NA   | 0 | 2  | Not-determined | Genome-fragment | NA | 0     |
| 57_vs_63263               | [full]    | 3429  | No  | NA   | 2 | 0  | Not-determined | Genome-fragment | NA | 0     |
| 57_vs_63284               | [full]    | 1732  | No  | NA   | 0 | 3  | Not-determined | Genome-fragment | NA | 0     |
| 57_vs_63339               | [full]    | 1011  | No  | NA   | 0 | 0  | Not-determined | Genome-fragment | NA | 0     |
| 57_vs_63341               | [full]    | 1268  | No  | NA   | 0 | 1  | Not-determined | Genome-fragment | NA | 0     |
| 57_vs_63373               | [full]    | 5064  | No  | NA   | 0 | 0  | Not-determined | Genome-fragment | NA | 0     |
| 57_vs_63393               | [full]    | 4124  | No  | NA   | 0 | 0  | Not-determined | Genome-fragment | NA | 0     |
| 57_vs_63408               | [full]    | 2903  | No  | NA   | 0 | 2  | Not-determined | Genome-fragment | NA | 0     |
| 57_vs_63532               | [full]    | 1999  | No  | NA   | 0 | 0  | Not-determined | Genome-fragment | NA | 0     |
| 57_vs_63565               | [full]    | 2212  | No  | NA   | 0 | 2  | Not-determined | Genome-fragment | NA | 0     |
| 513_vs_63851              | [full]    | 2217  | No  | NA   | 0 | 0  | Low-quality    | Genome-fragment | NA | 3.18  |
| 57_vs_63864               | [full]    | 1579  | No  | NA   | 0 | 1  | Not-determined | Genome-fragment | NA | 0     |
| 55_vs_k141_92068          | [full]    | 2237  | No  | NA   | 0 | 0  | Low-quality    | Genome-fragment | NA | 1.1   |
| 510_vs_110361             | [full]    | 2237  | No  | NA   | 0 | 0  | Low-quality    | Genome-fragment | NA | 18.81 |
| 514_vs_k141_43229         | [full]    | 2238  | No  | NA   | 0 | 0  | Low-quality    | Genome-fragment | NA | 5.11  |
| 57_vs_30183               | [full]    | 2238  | No  | NA   | 2 | 0  | Low-quality    | Genome-fragment | NA | 5.63  |
| 57_vs_63961               | [full]    | 2175  | No  | NA   | 0 | 0  | Not-determined | Genome-fragment | NA | 0     |
| 57_vs_64017               | [full]    | 1269  | No  | NA   | 0 | 0  | Not-determined | Genome-fragment | NA | 0     |
| 512_extracted_k141_40848  | [full]    | 2238  | No  | NA   | 0 | 1  | Low-quality    | Genome-fragment | NA | 4.39  |
| 57_extracted_112681       | [full]    | 2239  | No  | NA   | 0 | 1  | Low-quality    | Genome-fragment | NA | 0.9   |
| 57_vs_64165               | [full]    | 1750  | No  | NA   | 0 | 1  | Not-determined | Genome-fragment | NA | 0     |
| 57_vs_64380               | [full]    | 2302  | No  | NA   | 1 | 0  | Not-determined | Genome-fragment | NA | 0     |
| 58_vs_k141_39704          | [full]    | 2239  | No  | NA   | 1 | 0  | Low-quality    | Genome-fragment | NA | 5.38  |
| 51_vs_k141_25506          | [full]    | 2240  | No  | NA   | 0 | 1  | Low-quality    | Genome-fragment | NA | 1.54  |
| 55_extracted_k141_122272  | [full]    | 2240  | No  | NA   | 0 | 0  | Low-quality    | Genome-fragment | NA | 6.59  |
| 516_vs_52016              | [full]    | 2240  | No  | NA   | 2 | 0  | Low-quality    | Genome-fragment | NA | 4.84  |
| 512_vs_k141_105202        | [full]    | 2240  | No  | NA   | 0 | 0  | Low-quality    | Genome-fragment | NA | 6.05  |
| 57_vs_64616               | [full]    | 1004  | No  | NA   | 0 | 0  | Not-determined | Genome-fragment | NA | 0     |
| 59_vs_k141_76664          | [full]    | 2241  | No  | NA   | 0 | 0  | Low-quality    | Genome-fragment | NA | 4.9   |
| 57_vs_64688               | [full]    | 1201  | No  | NA   | 0 | 2  | Not-determined | Genome-fragment | NA | 0     |
| 57_vs_64796               | [full]    | 5514  | No  | NA   | 0 | 1  | Not-determined | Genome-fragment | NA | 0     |
| 511_vs_k141_43230         | [full]    | 2241  | No  | NA   | 0 | 0  | Low-quality    | Genome-fragment | NA | 5.52  |
| 511_vs_k141_82238         | [full]    | 2241  | No  | NA   | 0 | 1  | Low-quality    | Genome-fragment | NA | 4.52  |
| 57_vs_64985               | [full]    | 7197  | No  | NA   | 0 | 4  | Not-determined | Genome-fragment | NA | 0     |
| 57_vs_65174               | [full]    | 2659  | No  | NA   | 0 | 0  | Not-determined | Genome-fragment | NA | 0     |
| 53_vs_k141_29825          | [full]    | 2241  | Yes | 1968 | 1 | 1  | Low-quality    | Genome-fragment | NA | 1.6   |
| 516_vs_121485             | [full]    | 2241  | No  | NA   | 1 | 0  | Low-quality    | Genome-fragment | NA | 4.44  |
| 52_extracted_k141_9896    | [full]    | 2241  | No  | NA   | 0 | 0  | Low-quality    | Genome-fragment | NA | 2.33  |
| 57_vs_65310               | [full]    | 21775 | No  | NA   | 0 | 10 | Not-determined | Genome-fragment | NA | 0     |
| 57_vs_65362               | [full]    | 1842  | No  | NA   | 0 | 1  | Not-determined | Genome-fragment | NA | 0     |
| 57_vs_65438               | [full]    | 6902  | No  | NA   | 0 | 0  | Not-determined | Genome-fragment | NA | 0     |
| 57_vs_65465               | [full]    | 3350  | No  | NA   | 0 | 3  | Not-determined | Genome-fragment | NA | 0     |
| 57_vs_65471               | [full]    | 1909  | No  | NA   | 0 | 0  | Not-determined | Genome-fragment | NA | 0     |
| 58_vs_k141_202839         | [full]    | 1241  | No  | NA   | 2 | 0  | Low-quality    | Genome-fragment | NA | 5.15  |
| 57_vs_65557               | [full]    | 11617 | No  | NA   | 2 | 0  | Not-determined | Genome-fragment | NA | 0     |
| 513_vs_40625              | [full]    | 2242  | No  | NA   | 1 | 0  | Low-quality    | Genome-fragment | NA | 3.16  |
| 513_vs_121186             | [full]    | 2242  | No  | NA   | 2 | 0  | Low-quality    | Genome-fragment | NA | 6.49  |
| 53_vs_k141_44557          | [full]    | 2242  | No  | NA   | 2 | 0  | Low-quality    | Genome-fragment | NA | 1.09  |
| 57_vs_48013               | [full]    | 2242  | No  | NA   | 0 | 2  | Low-quality    | Genome-fragment | NA | 4.1   |
| NC3_of_k141_505           | [full]    | 2242  | No  | NA   | 0 | 0  | Low-quality    | Genome-fragment | NA | 4.31  |
| 57_vs_65753               | [full]    | 2540  | No  | NA   | 0 | 0  | Not-determined | Genome-fragment | NA | 0     |
| 510_vs_8236               | [full]    | 2242  | No  | NA   | 0 | 0  | Low-quality    | Genome-fragment | NA | 4.71  |
| 517_vs_k141_115430        | [full]    | 2243  | No  | NA   | 0 | 1  | Low-quality    | Genome-fragment | NA | 1.95  |
| 57_vs_66086               | [full]    | 1281  | No  | NA   | 0 | 0  | Not-determined | Genome-fragment | NA | 0     |
| 57_vs_66211               | [full]    | 1695  | No  | NA   | 0 | 1  | Not-determined | Genome-fragment | NA | 0     |
| 57_vs_66229               | [full]    | 1638  | No  | NA   | 0 | 0  | Not-determined | Genome-fragment | NA | 0     |
| 514_vs_k141_71998         | [full]    | 2243  | No  | NA   | 5 | 0  | Low-quality    | Genome-fragment | NA | 6.53  |
| 57_vs_66329               | [full]    | 1062  | No  | NA   | 1 | 0  | Not-determined | Genome-fragment | NA | 0     |
| 57_vs_66404               | [full]    | 1426  | No  | NA   | 0 | 2  | Not-determined | Genome-fragment | NA | 0     |
| 53_vs_k141_56459          | [full]    | 2243  | No  | NA   | 0 | 1  | Low-quality    | Genome-fragment | NA | 2.51  |
| 55_vs_k141_126614         | [full]    | 2243  | No  | NA   | 0 | 0  | Low-quality    | Genome-fragment | NA | 4.49  |
| 58_extracted_k141_108511  | [full]    | 2243  | No  | NA   | 0 | 1  | Low-quality    | Genome-fragment | NA | 3.52  |
| 57_vs_66573               | [full]    | 1050  | No  | NA   | 0 | 2  | Not-determined | Genome-fragment | NA | 0     |
| 57_vs_66574               | [full]    | 2829  | No  | NA   | 0 | 0  | Not-determined | Genome-fragment | NA | 0     |
| 57_vs_66593               | [full]    | 1562  | No  | NA   | 0 | 2  | Not-determined | Genome-fragment | NA | 0     |
| 57_vs_66598               | [full]    | 1028  | No  | NA   | 0 | 0  | Not-determined | Genome-fragment | NA | 0     |
| 512_vs_k141_134829        | [full]    | 2244  | No  | NA   | 0 | 2  | Low-quality    | Genome-fragment | NA | 1.36  |
| 57_vs_66618               | [full]    | 2150  | No  | NA   | 0 | 3  | Not-determined | Genome-fragment | NA | 0     |
| 57_vs_66631               | [full]    | 2901  | No  | NA   | 0 | 3  | Not-determined | Genome-fragment | NA | 0     |
| 517_extracted_k141_67269  | [full]    | 2245  | No  | NA   | 0 | 0  | Low-quality    | Genome-fragment | NA | 2.8   |
| 57_vs_66651               | [full]    | 2221  | No  | NA   | 0 | 0  | Not-determined | Genome-fragment | NA | 0     |
| 57_vs_66655               | [full]    | 3567  | No  | NA   | 0 | 3  | Not-determined | Genome-fragment | NA | 0     |
| 51_vs_k141_42888          | [full]    | 2245  | No  | NA   | 0 | 1  | Low-quality    | Genome-fragment | NA | 2.09  |
| 57_vs_66750               | [full]    | 1579  | No  | NA   | 0 | 1  | Not-determined | Genome-fragment | NA | 0     |
| 53_vs_k141_70042          | [full]    | 2245  | No  | NA   | 0 | 0  | Low-quality    | Genome-fragment | NA | 4.45  |
| 57_vs_66865               | [full]    | 1959  | No  | NA   | 0 | 0  | Not-determined | Genome-fragment | NA | 0     |
| 57_vs_66979               | [full]    | 7696  | No  | NA   | 0 | 3  | Not-determined | Genome-fragment | NA | 0     |
| 57_vs_67186               | [full]    | 2245  | No  | NA   | 1 | 0  | Low-quality    | Genome-fragment | NA | 4.84  |
| 57_vs_67065               | [full]    | 5651  | No  | NA   | 0 | 2  | Not-determined | Genome-fragment | NA | 0     |
| 53_extracted_k141_79922   | [full]    | 2246  | No  | NA   | 0 | 1  | Low-quality    | Genome-fragment | NA | 4.93  |
| 57_vs_67128               | [full]    | 2899  | No  | NA   | 0 | 3  | Not-determined | Genome-fragment | NA | 0     |
| 57_vs_67152               | [full]    | 1190  | No  | NA   | 0 | 0  | Not-determined | Genome-fragment | NA | 0     |
| 57_vs_67209               |           |       |     |      |   |    |                |                 |    |       |



|                           |       |     |      |    |   |                |                 |    |       |      |
|---------------------------|-------|-----|------|----|---|----------------|-----------------|----|-------|------|
| 57_vs_69238   full        | 5508  | No  | NA   | 0  | 3 | Not-determined | Genome-fragment | NA | 0     | 0    |
| 511_vs_k141_74571   full  | 2251  | No  | NA   | 0  | 0 | Low-quality    | Genome-fragment | NA | 3.06  | 0    |
| 55_vs_k141_45991   full   | 2251  | No  | NA   | 2  | 0 | Low-quality    | Genome-fragment | NA | 4.95  | 0    |
| 57_vs_69415   full        | 1614  | No  | NA   | 0  | 0 | Not-determined | Genome-fragment | NA | 0     | 0    |
| 57_vs_69435   full        | 2123  | No  | NA   | 0  | 2 | Not-determined | Genome-fragment | NA | 0     | 0    |
| 57_vs_81337   full        | 2251  | No  | NA   | 0  | 1 | Low-quality    | Genome-fragment | NA | 1.03  | 0    |
| 511_vs_k141_38812   full  | 2252  | No  | NA   | 3  | 0 | Low-quality    | Genome-fragment | NA | 5.68  | 0    |
| 510_vs_88576   full       | 2252  | No  | NA   | 0  | 0 | Low-quality    | Genome-fragment | NA | 4.87  | 0    |
| 57_vs_69630   full        | 28417 | No  | NA   | 26 | 0 | High-quality   | Genome-fragment | NA | 100   | 0    |
| 57_vs_69644   full        | 2598  | No  | NA   | 0  | 1 | Not-determined | Genome-fragment | NA | 0     | 0    |
| 511_extracted_k141_79418  | 2253  | No  | NA   | 0  | 0 | Low-quality    | Genome-fragment | NA | 1.12  | 0    |
| 57_vs_69717   full        | 2746  | No  | NA   | 0  | 2 | Not-determined | Genome-fragment | NA | 0     | 0    |
| 511_vs_k141_17597   full  | 2253  | No  | NA   | 0  | 0 | Low-quality    | Genome-fragment | NA | 5.71  | 0    |
| 57_vs_69901   full        | 3000  | No  | NA   | 0  | 2 | Not-determined | Genome-fragment | NA | 0     | 0    |
| 57_vs_69947   full        | 30996 | No  | NA   | 0  | 3 | Not-determined | Genome-fragment | NA | 0     | 0    |
| 57_vs_69951   full        | 2082  | No  | NA   | 0  | 2 | Not-determined | Genome-fragment | NA | 0     | 0    |
| 57_vs_69970   full        | 5363  | No  | NA   | 0  | 3 | Not-determined | Genome-fragment | NA | 0     | 0    |
| 53_extracted_k141_113629  | 2253  | No  | NA   | 2  | 0 | Low-quality    | Genome-fragment | NA | 3.48  | 0    |
| 52_vs_k141_85419   full   | 2253  | No  | NA   | 1  | 1 | Low-quality    | Genome-fragment | NA | 1.78  | 0    |
| 57_vs_14917   full        | 2253  | No  | NA   | 0  | 2 | Low-quality    | Genome-fragment | NA | 1.58  | 0    |
| 516_extracted_76158       | 2253  | No  | NA   | 2  | 0 | Low-quality    | Genome-fragment | NA | 2.39  | 0    |
| 512_extracted_k141_187023 | 2253  | No  | NA   | 0  | 0 | Low-quality    | Genome-fragment | NA | 0.41  | 0    |
| 515_vs_51884   full       | 2253  | Yes | 534  | 1  | 2 | Low-quality    | Genome-fragment | NA | 0.61  | 76.3 |
| 56_extracted_k141_12567   | 2253  | No  | NA   | 0  | 3 | Low-quality    | Genome-fragment | NA | 3.68  | 0    |
| 57_vs_70265   full        | 17875 | No  | NA   | 9  | 0 | Medium-quality | Genome-fragment | NA | 52.56 | 0    |
| 517_vs_k141_169065   full | 2254  | Yes | 1623 | 1  | 1 | Low-quality    | Genome-fragment | NA | 3.45  | 27.9 |
| 514_extracted_k141_9243   | 2254  | No  | NA   | 7  | 0 | Low-quality    | Genome-fragment | NA | 7.43  | 0    |
| 57_vs_70374   full        | 5575  | No  | NA   | 0  | 6 | Not-determined | Genome-fragment | NA | 0     | 0    |
| 514_vs_k141_58189   full  | 2254  | No  | NA   | 1  | 1 | Low-quality    | Genome-fragment | NA | 0.88  | 0    |
| 516_vs_167159   full      | 2254  | No  | NA   | 1  | 0 | Low-quality    | Genome-fragment | NA | 3.94  | 0    |
| 510_vs_107312   full      | 2254  | No  | NA   | 2  | 0 | Low-quality    | Genome-fragment | NA | 5.29  | 0    |
| 57_vs_70537   full        | 8912  | No  | NA   | 0  | 5 | Not-determined | Genome-fragment | NA | 0     | 0    |
| 517_extracted_k141_116830 | 2255  | No  | NA   | 0  | 1 | Low-quality    | Genome-fragment | NA | 3.26  | 0    |
| 57_vs_70659   full        | 1808  | No  | NA   | 0  | 1 | Not-determined | Genome-fragment | NA | 0     | 0    |
| 57_vs_70665   full        | 12370 | No  | NA   | 0  | 5 | Not-determined | Genome-fragment | NA | 0     | 0    |
| 57_vs_70716   full        | 1614  | No  | NA   | 0  | 0 | Not-determined | Genome-fragment | NA | 0     | 0    |
| 57_vs_70725   full        | 2275  | No  | NA   | 0  | 0 | Not-determined | Genome-fragment | NA | 0     | 0    |
| 57_vs_70803   full        | 1157  | No  | NA   | 0  | 0 | Not-determined | Genome-fragment | NA | 0     | 0    |
| 53_vs_k141_40121   full   | 2255  | No  | NA   | 2  | 2 | Low-quality    | Genome-fragment | NA | 1.14  | 0    |
| 55_vs_k141_46133   full   | 2255  | No  | NA   | 1  | 0 | Low-quality    | Genome-fragment | NA | 2.81  | 0    |
| 516_vs_20922   full       | 2255  | No  | NA   | 0  | 2 | Low-quality    | Genome-fragment | NA | 1     | 0    |
| 512_vs_k141_278279   full | 2255  | No  | NA   | 0  | 0 | Low-quality    | Genome-fragment | NA | 5.81  | 0    |
| 57_vs_71170   full        | 2666  | No  | NA   | 0  | 0 | Not-determined | Genome-fragment | NA | 0     | 0    |
| 58_vs_k141_90694   full   | 2255  | No  | NA   | 1  | 2 | Low-quality    | Genome-fragment | NA | 3.59  | 0    |
| 514_extracted_k141_47085  | 2256  | No  | NA   | 3  | 0 | Low-quality    | Genome-fragment | NA | 7.26  | 0    |
| 511_extracted_k141_34644  | 2257  | No  | NA   | 1  | 0 | Low-quality    | Genome-fragment | NA | 4.14  | 0    |
| 55_extracted_k141_10824   | 2257  | No  | NA   | 1  | 0 | Low-quality    | Genome-fragment | NA | 4.81  | 0    |
| 516_extracted_60990       | 2257  | No  | NA   | 0  | 1 | Low-quality    | Genome-fragment | NA | 3.9   | 0    |
| 516_extracted_107765      | 2257  | No  | NA   | 0  | 0 | Low-quality    | Genome-fragment | NA | 12.4  | 0    |
| 57_vs_71521   full        | 2072  | No  | NA   | 0  | 2 | Not-determined | Genome-fragment | NA | 0     | 0    |
| 57_vs_71526   full        | 1603  | No  | NA   | 0  | 1 | Not-determined | Genome-fragment | NA | 0     | 0    |
| 57_vs_71614   full        | 5941  | No  | NA   | 0  | 0 | Not-determined | Genome-fragment | NA | 0     | 0    |
| 58_vs_k141_26775   full   | 2257  | No  | NA   | 0  | 1 | Low-quality    | Genome-fragment | NA | 2.97  | 0    |
| 57_vs_71836   full        | 1121  | No  | NA   | 0  | 0 | Not-determined | Genome-fragment | NA | 0     | 0    |
| 57_vs_72185   full        | 1287  | No  | NA   | 0  | 0 | Not-determined | Genome-fragment | NA | 0     | 0    |
| 513_vs_12641   full       | 2258  | No  | NA   | 0  | 0 | Low-quality    | Genome-fragment | NA | 1.21  | 0    |
| 514_vs_k141_110390   full | 2258  | No  | NA   | 0  | 0 | Low-quality    | Genome-fragment | NA | 5.07  | 0    |
| 57_vs_72007   full        | 1377  | No  | NA   | 0  | 0 | Not-determined | Genome-fragment | NA | 0     | 0    |
| 57_vs_72012   full        | 1388  | No  | NA   | 0  | 0 | Not-determined | Genome-fragment | NA | 0     | 0    |
| 514_vs_k141_114748   full | 2258  | No  | NA   | 0  | 2 | Low-quality    | Genome-fragment | NA | 3.9   | 0    |
| 512_vs_k141_143613   full | 2258  | No  | NA   | 0  | 1 | Low-quality    | Genome-fragment | NA | 2.32  | 0    |
| 512_vs_k141_139368   full | 2258  | No  | NA   | 0  | 0 | Low-quality    | Genome-fragment | NA | 4.96  | 0    |
| 57_vs_72203   full        | 1628  | No  | NA   | 0  | 2 | Not-determined | Genome-fragment | NA | 0     | 0    |
| 57_vs_72213   full        | 2149  | No  | NA   | 0  | 0 | Not-determined | Genome-fragment | NA | 0     | 0    |
| 57_vs_72336   full        | 4062  | No  | NA   | 0  | 0 | Not-determined | Genome-fragment | NA | 0     | 0    |
| 57_vs_72415   full        | 1180  | No  | NA   | 0  | 1 | Not-determined | Genome-fragment | NA | 0     | 0    |
| 512_vs_k141_171493   full | 2258  | No  | NA   | 0  | 1 | Low-quality    | Genome-fragment | NA | 1.09  | 0    |
| 513_vs_28449   full       | 2259  | No  | NA   | 0  | 2 | Low-quality    | Genome-fragment | NA | 1.96  | 0    |
| 57_vs_72628   full        | 2117  | No  | NA   | 0  | 0 | Not-determined | Genome-fragment | NA | 0     | 0    |
| 514_vs_k141_98601   full  | 2259  | No  | NA   | 3  | 0 | Low-quality    | Genome-fragment | NA | 5.75  | 0    |
| 512_vs_k141_152958   full | 2259  | No  | NA   | 1  | 0 | Low-quality    | Genome-fragment | NA | 1.42  | 0    |
| 57_vs_72658   full        | 3955  | No  | NA   | 2  | 2 | Not-determined | Genome-fragment | NA | 0     | 0    |
| 58_vs_k141_97317   full   | 2259  | No  | NA   | 2  | 0 | Low-quality    | Genome-fragment | NA | 4.08  | 0    |
| 57_vs_72927   full        | 1218  | No  | NA   | 0  | 1 | Not-determined | Genome-fragment | NA | 0     | 0    |
| 57_vs_72930   full        | 4653  | No  | NA   | 0  | 2 | Not-determined | Genome-fragment | NA | 0     | 0    |
| 53_extracted_k141_45426   | 2260  | No  | NA   | 0  | 3 | Low-quality    | Genome-fragment | NA | 1.36  | 0    |
| 57_vs_124320   full       | 2260  | No  | NA   | 0  | 0 | Low-quality    | Genome-fragment | NA | 1.91  | 0    |
| 57_vs_73028   full        | 4453  | No  | NA   | 0  | 1 | Not-determined | Genome-fragment | NA | 0     | 0    |
| 510_extracted_58574       | 2260  | No  | NA   | 0  | 0 | Low-quality    | Genome-fragment | NA | 4.17  | 0    |
| 512_vs_k141_34775   full  | 2260  | No  | NA   | 3  | 0 | Low-quality    | Genome-fragment | NA | 1.48  | 0    |
| 54_extracted_6023         | 2260  | No  | NA   | 3  | 0 | Low-quality    | Genome-fragment | NA | 7.25  | 0    |
| 57_vs_73280   full        | 39043 | No  | NA   | 17 | 0 | High-quality   | Genome-fragment | NA | 97.58 | 0    |
| 57_vs_73287   full        | 5585  | No  | NA   | 0  | 4 | Not-determined | Genome-fragment | NA | 0     | 0    |
| 57_vs_73305   full        | 1601  | No  | NA   | 0  | 0 | Not-determined | Genome-fragment | NA | 0     | 0    |
| 514_extracted_k141_55996  | 2261  | No  | NA   | 0  | 0 | Low-quality    | Genome-fragment | NA | 5.59  | 0    |
| 57_vs_73437   full        | 4110  | No  | NA   | 2  | 0 | Not-determined | Genome-fragment | NA | 0     | 0    |
| 57_vs_57153   full        | 2261  | No  | NA   | 1  | 0 | Low-quality    | Genome-fragment | NA | 2.38  | 0    |
| 57_vs_73475   full        | 1591  | No  | NA   | 0  | 0 | Not-determined | Genome-fragment | NA | 0     | 0    |
| 516_vs_173136   full      | 2261  | No  | NA   | 0  | 0 | Low-quality    | Genome-fragment | NA | 41.84 | 0    |
| 57_vs_73628   full        | 1350  | No  | NA   | 0  | 1 | Not-determined | Genome-fragment | NA | 0     | 0    |
| 57_vs_73647   full        | 1883  | No  | NA   | 0  | 0 | Not-determined | Genome-fragment | NA | 0     | 0    |
| 54_extracted_22116        | 2261  | No  | NA   | 0  | 1 | Low-quality    | Genome-fragment | NA | 1.42  | 0    |
| 57_vs_73746   full        | 2946  | No  | NA   | 0  | 0 | Not-determined | Genome-fragment | NA | 0     | 0    |
| 57_vs_73758   full        | 2800  | No  | NA   | 0  | 1 | Not-determined | Genome-fragment | NA | 0     | 0    |
| 57_vs_73804   full        | 1435  | No  | NA   | 0  | 0 | Not-determined | Genome-fragment | NA | 0     | 0    |
| 57_vs_73827   full        | 6890  | No  | NA   | 0  | 0 | Not-determined | Genome-fragment | NA | 0     | 0    |
| 57_vs_73867   full        | 2056  | No  | NA   | 0  | 0 | Not-determined | Genome-fragment | NA | 0     | 0    |
| 57_vs_73892   full        | 2713  | No  | NA   | 0  | 0 | Not-determined | Genome-fragment | NA | 0     | 0    |
| 57_vs_73898   full        | 3478  | No  | NA   | 0  | 2 | Not-determined | Genome-fragment | NA | 0     | 0    |
| 57_vs_73974   full        | 2310  | No  | NA   | 0  | 0 | Not-determined | Genome-fragment | NA | 0     | 0    |
| 514_extracted_k141_61940  | 2262  | No  | NA   | 0  | 0 | Low-quality    | Genome-fragment | NA | 1.52  | 0    |
| 57_vs_74220   full        | 1381  | No  | NA   | 0  | 1 | Not-determined | Genome-fragment | NA | 0     | 0    |
| 51_extracted_k141_110542  | 2262  | No  | NA   | 1  | 0 | Low-quality    | Genome-fragment | NA | 3.95  | 0    |
| 51_extracted_k141_11471   | 2262  | No  | NA   | 0  | 2 | Low-quality    | Genome-fragment | NA | 0.62  | 0    |
| 51_vs_k141_69477   full   | 2262  | No  | NA   | 0  | 1 | Low-quality    | Genome-fragment | NA | 2.7   | 0    |
| 57_vs_74388   full        | 1778  | No  | NA   | 0  | 0 | Not-determined | Genome-fragment | NA | 0     | 0    |
| 53_vs_k141_37562   full   | 2262  | No  | NA   | 1  | 0 | Low-quality    | Genome-fragment | NA | 1.52  | 0    |
| 57_vs_74511   full        | 2981  | No  | NA   | 0  | 2 | Not-determined | Genome-fragment | NA | 0     | 0    |
| 57_vs_74540   full        | 1381  | No  | NA   | 0  | 1 | Not-determined | Genome-fragment | NA | 0     | 0    |
| 57_vs_74583   full        | 4256  | No  | NA   | 0  | 1 | Not-determined | Genome-fragment | NA | 0     | 0    |
| 57_vs_39678   full        | 2262  | No  | NA   | 1  | 0 | Low-quality    | Genome-fragment | NA | 3.31  | 0    |
| 57_vs_74874   full        | 4062  | No  | NA   | 0  | 2 | Not-determined | Genome-fragment | NA | 0     | 0    |
| 57_vs_74985   full        | 3074  | No  | NA   | 0  | 1 | Not-determined | Genome-fragment | NA | 0     | 0    |
| 57_vs_74998   full        | 1204  | No  | NA   | 0  | 1 | Not-determined | Genome-fragment | NA | 0     | 0    |
| 57_vs_75057   full        | 1385  | No  | NA   | 0  | 0 | Not-determined | Genome-fragment | NA | 0     | 0    |
| 510_vs_54237   full       | 2262  | No  | NA   | 2  | 0 | Low-quality    | Genome-fragment | NA | 3.68  | 0    |
| 59_vs_k141_77121   full   | 2263  | No  | NA   | 1  | 0 | Low-quality    | Genome-fragment | NA | 5.43  | 0    |
| 57_vs_63031   full        | 2263  | No  | NA   | 2  | 0 | Low-quality    | Genome-fragment | NA | 5.42  | 0    |
| 57_vs_75106   full        | 1352  | No  | NA   | 0  | 1 | Not-determined | Genome-fragment | NA | 0     | 0    |
| 516_vs_59654   full       | 2263  | No  | NA   | 0  | 1 | Low-quality    | Genome-fragment | NA | 1.06  | 0    |
| 58_vs_k141_19940   full   | 2263  | No  | NA   | 3  | 0 | Low-quality    | Genome-fragment | NA | 6.03  | 0    |
| 58_vs_k141_153648   full  | 2263  | No  | NA   | 0  | 0 | Low-quality    | Genome-fragment | NA | 4.13  | 0    |
| 514_vs_k141_68050   full  | 2264  | No  | NA   | 5  | 0 | Low-quality    | Genome-fragment | NA | 4.86  | 0    |
| 55_extracted_k141_108763  | 2264  | No  | NA   | 1  | 0 | Low-quality    | Genome-fragment | NA | 1.47  | 0    |
| 516_vs_67243   full       | 2264  | No  | NA   | 0  | 0 | Low-quality    | Genome-fragment | NA | 5.22  | 0    |
| 53_vs_k141_53363   full   | 2266  | No  | NA   | 2  | 0 | Low-quality    | Genome-fragment | NA | 5.93  | 0    |
| 55_vs_k141_140405   full  | 2266  | No  | NA   | 0  | 1 | Low-quality    | Genome-fragment | NA | 5.58  | 0    |
| 516_extracted_116635      | 2266  | No  | NA   | 1  | 0 | Low-quality    | Genome-fragment | NA | 3.74  | 0    |
| 515_vs_76232   full       | 2266  | No  | NA   | 0  | 2 | Low-quality    | Genome-fragment | NA | 1     | 0    |
| 57_vs_75813   full        | 8158  | No  | NA   | 0  | 5 | Not-determined | Genome-fragment | NA | 0     | 0    |
| 57_vs_76052   full        | 5882  | No  | NA   | 0  | 1 | Not-determined | Genome-fragment | NA | 0     | 0    |
| 517_vs_k141_61435   full  | 2267  | No  | NA   | 0  | 1 | Low-quality    | Genome-fragment | NA | 0.65  | 0    |
| 57_vs_76150   full        | 7023  | No  | NA   | 0  | 4 | Not-determined | Genome-fragment | NA | 0     | 0    |
| 511_extracted_k141_83868  | 2267  | No  | NA   | 0  | 0 | Low-quality    | Genome-fragment | NA | 2.56  | 0    |
| 514_vs_k141_112830   full | 2267  | No  | NA   | 0  | 0 | Low-quality    | Genome-         |    |       |      |



|                            |       |     |       |    |   |                |                 |    |       |       |
|----------------------------|-------|-----|-------|----|---|----------------|-----------------|----|-------|-------|
| 57_vs_78888   full         | 4027  | No  | NA    | 0  | 0 | Not-determined | Genome-fragment | NA | 5.59  | 0     |
| 512_vs_k141_167085   full  | 2273  | No  | NA    | 0  | 0 | Low-quality    | Genome-fragment | NA | 3.77  | 0     |
| 57_vs_78950   full         | 1328  | No  | NA    | 0  | 0 | Not-determined | Genome-fragment | NA | 3.67  | 0     |
| 515_extracted_3153         | 2273  | No  | NA    | 0  | 0 | Low-quality    | Genome-fragment | NA | 1.92  | 0     |
| 54_extracted_10878         | 2273  | No  | NA    | 2  | 0 | Low-quality    | Genome-fragment | NA | 4.28  | 0     |
| 51_vs_k141_61752   full    | 2274  | No  | NA    | 0  | 0 | Low-quality    | Genome-fragment | NA | 4.22  | 0     |
| 53_vs_k141_102367   full   | 2274  | No  | NA    | 0  | 0 | Low-quality    | Genome-fragment | NA | 5.68  | 0     |
| 55_vs_k141_13328   full    | 2274  | No  | NA    | 0  | 1 | Low-quality    | Genome-fragment | NA | 4.14  | 0     |
| 516_vs_85338   H2gene      | 2274  | No  | NA    | 2  | 0 | Low-quality    | Genome-fragment | NA | 4.29  | 0     |
| 510_vs_32599   H2gene      | 2274  | No  | NA    | 1  | 0 | Low-quality    | Genome-fragment | NA | 5.62  | 0     |
| 512_vs_k141_28124   full   | 2274  | No  | NA    | 2  | 0 | Low-quality    | Genome-fragment | NA | 1.05  | 0     |
| 58_vs_k141_70644   full    | 2274  | No  | NA    | 0  | 0 | Low-quality    | Genome-fragment | NA | 3.81  | 0     |
| 517_vs_k141_47511   full   | 2275  | No  | NA    | 0  | 1 | Low-quality    | Genome-fragment | NA | 5.41  | 0     |
| 57_vs_79526   full         | 2248  | No  | NA    | 0  | 0 | Not-determined | Genome-fragment | NA | 7.5   | 0     |
| 514_vs_k141_31778   full   | 2275  | No  | NA    | 0  | 0 | Low-quality    | Genome-fragment | NA | 6.04  | 0     |
| 57_vs_79636   full         | 2749  | No  | NA    | 0  | 1 | Not-determined | Genome-fragment | NA | 3.5   | 0     |
| 57_vs_79795   full         | 1196  | No  | NA    | 0  | 0 | Not-determined | Genome-fragment | NA | 5.08  | 0     |
| 57_vs_79815   full         | 1665  | No  | NA    | 0  | 0 | Not-determined | Genome-fragment | NA | 2.77  | 0     |
| 57_vs_79906   full         | 2859  | No  | NA    | 0  | 1 | Not-determined | Genome-fragment | NA | 3.8   | 0     |
| 511_vs_k141_31521   H2gene | 2276  | No  | NA    | 1  | 0 | Low-quality    | Genome-fragment | NA | 6.23  | 0     |
| 57_vs_80006   full         | 1389  | No  | NA    | 0  | 3 | Not-determined | Genome-fragment | NA | 5.41  | 0     |
| 57_vs_80009   full         | 5932  | No  | NA    | 0  | 1 | Not-determined | Genome-fragment | NA | 7.5   | 0     |
| 57_vs_80010   full         | 2213  | No  | NA    | 0  | 1 | Not-determined | Genome-fragment | NA | 6.04  | 0     |
| 57_vs_96307   full         | 2276  | No  | NA    | 1  | 0 | Low-quality    | Genome-fragment | NA | 3.5   | 0     |
| 57_vs_96095   full         | 1260  | No  | NA    | 0  | 0 | Low-quality    | Genome-fragment | NA | 5.08  | 0     |
| 56_extracted_k141_55416    | 2276  | No  | NA    | 6  | 0 | Low-quality    | Genome-fragment | NA | 2.77  | 0     |
| 56_vs_k141_38230   full    | 2276  | No  | NA    | 3  | 0 | Low-quality    | Genome-fragment | NA | 3.8   | 0     |
| 514_extracted_k141_43415   | 2277  | No  | NA    | 3  | 0 | Low-quality    | Genome-fragment | NA | 3.01  | 0     |
| 57_vs_80214   full         | 3569  | No  | NA    | 1  | 1 | Not-determined | Genome-fragment | NA | 1.8   | 0     |
| 57_vs_30742   H2gene       | 2277  | No  | NA    | 1  | 0 | Low-quality    | Genome-fragment | NA | 4.06  | 0     |
| 57_vs_80315   full         | 2117  | No  | NA    | 0  | 0 | Not-determined | Genome-fragment | NA | 2.77  | 0     |
| 511_vs_k141_47406   full   | 2278  | No  | NA    | 0  | 0 | Low-quality    | Genome-fragment | NA | 3.8   | 0     |
| 57_vs_80432   full         | 14357 | No  | NA    | 0  | 5 | Not-determined | Genome-fragment | NA | 3.94  | 0     |
| 514_vs_k141_35460   full   | 2278  | No  | NA    | 0  | 2 | Low-quality    | Genome-fragment | NA | 5.21  | 12.07 |
| 57_vs_80652   full         | 2313  | No  | NA    | 0  | 1 | Not-determined | Genome-fragment | NA | 3.9   | 0     |
| 514_vs_k141_87214   full   | 2279  | No  | NA    | 0  | 1 | Low-quality    | Genome-fragment | NA | 1.18  | 0     |
| 55_vs_k141_18659   full    | 2279  | No  | NA    | 1  | 0 | Low-quality    | Genome-fragment | NA | 4.06  | 0     |
| 57_vs_80826   full         | 7118  | No  | NA    | 0  | 0 | Not-determined | Genome-fragment | NA | 2.77  | 0     |
| 57_vs_80835   full         | 1260  | No  | NA    | 0  | 3 | Not-determined | Genome-fragment | NA | 3.8   | 0     |
| 55_vs_k141_116373   full   | 2279  | No  | NA    | 0  | 0 | Low-quality    | Genome-fragment | NA | 3.94  | 0     |
| 57_vs_80892   full         | 4353  | No  | NA    | 0  | 0 | Not-determined | Genome-fragment | NA | 5.21  | 12.07 |
| 55_vs_k141_62140   full    | 2279  | No  | NA    | 0  | 2 | Low-quality    | Genome-fragment | NA | 3.9   | 0     |
| 57_vs_81123   full         | 2362  | No  | NA    | 0  | 1 | Not-determined | Genome-fragment | NA | 5.08  | 0     |
| 57_vs_81141   full         | 2343  | No  | NA    | 0  | 2 | Not-determined | Genome-fragment | NA | 5.59  | 0     |
| 57_vs_30827   full         | 2279  | No  | NA    | 3  | 0 | Low-quality    | Genome-fragment | NA | 6.62  | 0     |
| 57_vs_39941   full         | 2279  | No  | NA    | 1  | 0 | Low-quality    | Genome-fragment | NA | 4.43  | 0     |
| 57_vs_81498   full         | 1458  | No  | NA    | 0  | 0 | Not-determined | Genome-fragment | NA | 2.98  | 0     |
| 57_vs_81551   full         | 1303  | No  | NA    | 0  | 0 | Not-determined | Genome-fragment | NA | 5.64  | 0     |
| 516_vs_14450   full        | 2279  | No  | NA    | 0  | 0 | Low-quality    | Genome-fragment | NA | 1.49  | 0     |
| 57_vs_81553   full         | 3706  | No  | NA    | 0  | 0 | Not-determined | Genome-fragment | NA | 5.9   | 0     |
| 57_vs_81677   full         | 1855  | No  | NA    | 0  | 2 | Not-determined | Genome-fragment | NA | 3.94  | 0     |
| 512_vs_k141_275672   full  | 2279  | No  | NA    | 0  | 0 | Low-quality    | Genome-fragment | NA | 5.21  | 12.07 |
| 57_vs_81712   full         | 2080  | No  | NA    | 0  | 2 | Not-determined | Genome-fragment | NA | 3.9   | 0     |
| 57_vs_81823   full         | 2386  | No  | NA    | 0  | 0 | Not-determined | Genome-fragment | NA | 5.64  | 0     |
| 512_vs_k141_60869   full   | 2279  | No  | NA    | 0  | 0 | Low-quality    | Genome-fragment | NA | 1.49  | 0     |
| 57_vs_81871   full         | 5815  | No  | NA    | 0  | 2 | Not-determined | Genome-fragment | NA | 5.9   | 0     |
| 512_vs_k141_37622   full   | 2279  | No  | NA    | 0  | 1 | Low-quality    | Genome-fragment | NA | 3.94  | 0     |
| 58_extracted_k141_77302    | 2279  | No  | NA    | 0  | 0 | Low-quality    | Genome-fragment | NA | 3.94  | 0     |
| 57_vs_81990   full         | 2064  | No  | NA    | 0  | 6 | Not-determined | Genome-fragment | NA | 5.21  | 12.07 |
| 58_vs_k141_185418   full   | 2279  | No  | NA    | 2  | 0 | Low-quality    | Genome-fragment | NA | 3.9   | 0     |
| 57_vs_82092   full         | 1382  | No  | NA    | 0  | 0 | Not-determined | Genome-fragment | NA | 5.21  | 12.07 |
| 57_vs_82140   full         | 22206 | Yes | 19525 | 12 | 3 | High-quality   | Genome-fragment | NA | 3.9   | 0     |
| 51_vs_k141_72278   full    | 2280  | No  | NA    | 0  | 1 | Low-quality    | Genome-fragment | NA | 2.31  | 0     |
| 57_vs_82383   full         | 2249  | No  | NA    | 0  | 2 | Not-determined | Genome-fragment | NA | 6.32  | 0     |
| 53_vs_k141_107409   full   | 2280  | No  | NA    | 0  | 4 | Low-quality    | Genome-fragment | NA | 6.25  | 0     |
| 55_vs_k141_14513   full    | 2280  | No  | NA    | 1  | 0 | Low-quality    | Genome-fragment | NA | 1.19  | 0     |
| 58_vs_k141_177021   full   | 2280  | No  | NA    | 0  | 2 | Low-quality    | Genome-fragment | NA | 4.24  | 0     |
| 57_vs_82471   full         | 2430  | No  | NA    | 0  | 2 | Not-determined | Genome-fragment | NA | 1.3   | 0     |
| 57_vs_82541   full         | 2198  | No  | NA    | 0  | 2 | Not-determined | Genome-fragment | NA | 6.17  | 0     |
| 513_vs_85462   full        | 2281  | No  | NA    | 0  | 0 | Low-quality    | Genome-fragment | NA | 4.24  | 0     |
| 57_vs_82610   full         | 1865  | No  | NA    | 0  | 2 | Not-determined | Genome-fragment | NA | 4.68  | 0     |
| 57_vs_82658   full         | 1147  | No  | NA    | 0  | 0 | Not-determined | Genome-fragment | NA | 2.83  | 0     |
| 57_vs_82663   full         | 2365  | No  | NA    | 0  | 1 | Not-determined | Genome-fragment | NA | 5.07  | 0     |
| 53_vs_k141_91277   full    | 2281  | No  | NA    | 0  | 1 | Low-quality    | Genome-fragment | NA | 1.3   | 0     |
| 512_vs_k141_73442   full   | 2281  | No  | NA    | 0  | 0 | Low-quality    | Genome-fragment | NA | 7.42  | 0     |
| 57_vs_82793   full         | 1874  | No  | NA    | 0  | 0 | Not-determined | Genome-fragment | NA | 2.43  | 0     |
| 58_vs_k141_38334   full    | 2281  | No  | NA    | 3  | 0 | Low-quality    | Genome-fragment | NA | 100   | 0     |
| 517_vs_k141_16213   full   | 2282  | No  | NA    | 0  | 0 | Low-quality    | Genome-fragment | NA | 6.57  | 0     |
| 57_vs_83100   full         | 43538 | No  | NA    | 30 | 0 | High-quality   | Genome-fragment | NA | 0.51  | 0     |
| 57_vs_83166   full         | 1592  | No  | NA    | 0  | 0 | Not-determined | Genome-fragment | NA | 5.01  | 0     |
| 56_vs_k141_145672   full   | 2282  | No  | NA    | 1  | 0 | Low-quality    | Genome-fragment | NA | 4.78  | 0     |
| 57_vs_83322   full         | 1461  | No  | NA    | 0  | 1 | Not-determined | Genome-fragment | NA | 51.99 | 0     |
| 517_vs_k141_165857   full  | 2283  | No  | NA    | 0  | 1 | Low-quality    | Genome-fragment | NA | 5.07  | 0     |
| 57_vs_83393   full         | 2514  | No  | NA    | 0  | 2 | Not-determined | Genome-fragment | NA | 1.3   | 0     |
| 59_vs_k141_7784   full     | 2283  | No  | NA    | 0  | 0 | Low-quality    | Genome-fragment | NA | 6.17  | 0     |
| 59_vs_k141_47124   full    | 2283  | No  | NA    | 2  | 0 | Low-quality    | Genome-fragment | NA | 4.24  | 0     |
| 57_vs_83474   full         | 21040 | No  | NA    | 6  | 1 | Medium-quality | Genome-fragment | NA | 4.68  | 0     |
| 511_vs_k141_89564   full   | 2283  | No  | NA    | 1  | 0 | Low-quality    | Genome-fragment | NA | 2.83  | 0     |
| 57_vs_83598   full         | 2136  | No  | NA    | 1  | 0 | Not-determined | Genome-fragment | NA | 5.07  | 0     |
| 51_extracted_k141_158144   | 2283  | No  | NA    | 1  | 0 | Low-quality    | Genome-fragment | NA | 1.3   | 0     |
| 57_vs_85461   full         | 2283  | No  | NA    | 2  | 0 | Low-quality    | Genome-fragment | NA | 6.17  | 0     |
| 57_vs_85780   full         | 1592  | No  | NA    | 0  | 2 | Not-determined | Genome-fragment | NA | 4.24  | 0     |
| 57_vs_83778   full         | 2806  | No  | NA    | 0  | 2 | Not-determined | Genome-fragment | NA | 4.68  | 0     |
| 512_vs_k141_114630   full  | 2283  | No  | NA    | 1  | 0 | Low-quality    | Genome-fragment | NA | 2.83  | 0     |
| 57_vs_83817   full         | 3445  | No  | NA    | 0  | 2 | Not-determined | Genome-fragment | NA | 5.07  | 0     |
| 58_vs_k141_132572   full   | 2283  | No  | NA    | 0  | 0 | Low-quality    | Genome-fragment | NA | 1.3   | 0     |
| 58_vs_k141_57195   full    | 2283  | No  | NA    | 1  | 0 | Low-quality    | Genome-fragment | NA | 6.17  | 0     |
| 57_vs_83910   full         | 1529  | No  | NA    | 0  | 1 | Not-determined | Genome-fragment | NA | 4.24  | 0     |
| 57_vs_83957   full         | 1910  | No  | NA    | 0  | 0 | Not-determined | Genome-fragment | NA | 4.68  | 0     |
| 57_vs_83983   full         | 1821  | No  | NA    | 0  | 0 | Not-determined | Genome-fragment | NA | 2.83  | 0     |
| 59_vs_k141_40891   full    | 2284  | No  | NA    | 2  | 0 | Low-quality    | Genome-fragment | NA | 5.74  | 0     |
| 57_vs_84280   full         | 2151  | No  | NA    | 0  | 1 | Not-determined | Genome-fragment | NA | 4.24  | 0     |
| 57_vs_84290   full         | 1694  | No  | NA    | 0  | 1 | Not-determined | Genome-fragment | NA | 4.68  | 0     |
| 57_vs_84346   full         | 1304  | No  | NA    | 0  | 1 | Not-determined | Genome-fragment | NA | 4.23  | 0     |
| 57_vs_84456   full         | 2357  | No  | NA    | 0  | 2 | Not-determined | Genome-fragment | NA | 4.23  | 0     |
| 511_vs_k141_4638   full    | 2284  | No  | NA    | 2  | 0 | Low-quality    | Genome-fragment | NA | 0.71  | 0     |
| 53_vs_k141_121250   full   | 2284  | No  | NA    | 0  | 3 | Low-quality    | Genome-fragment | NA | 1.29  | 0     |
| 57_vs_84583   full         | 6138  | No  | NA    | 0  | 4 | Not-determined | Genome-fragment | NA | 7.78  | 0     |
| 516_vs_114796   full       | 2284  | No  | NA    | 0  | 2 | Low-quality    | Genome-fragment | NA | 3.43  | 0     |
| 57_vs_84612   full         | 1647  | No  | NA    | 0  | 0 | Not-determined | Genome-fragment | NA | 4.23  | 0     |
| 57_vs_84618   full         | 1156  | No  | NA    | 0  | 0 | Not-determined | Genome-fragment | NA | 6.55  | 0     |
| 54_vs_VMSortr_18816-cat_2  | 2284  | No  | NA    | 0  | 0 | Low-quality    | Genome-fragment | NA | 7.78  | 0     |
| 58_vs_k141_165832   full   | 2284  | No  | NA    | 2  | 0 | Low-quality    | Genome-fragment | NA | 3.43  | 0     |
| 517_vs_k141_150829   full  | 2285  | No  | NA    | 1  | 0 | Low-quality    | Genome-fragment | NA | 4.23  | 0     |
| 57_vs_84752   full         | 2313  | No  | NA    | 0  | 2 | Not-determined | Genome-fragment | NA | 4.23  | 0     |
| 57_vs_84779   full         | 2516  | No  | NA    | 0  | 1 | Not-determined | Genome-fragment | NA | 5.36  | 0     |
| 513_vs_52244   full        | 2285  | No  | NA    | 0  | 0 | Low-quality    | Genome-fragment | NA | 5.21  | 0     |
| 53_vs_k141_43898   full    | 2285  | No  | NA    | 0  | 0 | Low-quality    | Genome-fragment | NA | 5.65  | 0     |
| 55_vs_k141_77027   full    | 2285  | No  | NA    | 0  | 0 | Low-quality    | Genome-fragment | NA | 1.29  | 0     |
| 512_extracted_k141_23151   | 2285  | No  | NA    | 0  | 1 | Low-quality    | Genome-fragment | NA | 1.29  | 0     |
| 57_vs_85011   full         | 2734  | No  | NA    | 0  | 0 | Not-determined | Genome-fragment | NA | 1.47  | 0     |
| 57_vs_85088   full         | 1641  | No  | NA    | 0  | 1 | Not-determined | Genome-fragment | NA | 4.23  | 0     |
| 57_vs_85078   full         | 1462  | No  | NA    | 0  | 1 | Not-determined | Genome-fragment | NA | 2.57  | 0     |
| 59_vs_k141_50808   full    | 2286  | No  | NA    | 0  | 3 | Low-quality    | Genome-fragment | NA | 4.78  | 0     |
| 53_vs_k141_112239   full   | 2286  | No  | NA    | 0  | 0 | Low-quality    | Genome-fragment | NA | 3.08  | 0     |
| 55_vs_k141_9450   full     | 2286  | No  | NA    | 1  | 0 | Low-quality    | Genome-fragment | NA | 1.88  | 0     |
| 57_vs_k141_35593   full    | 2287  | No  | NA    | 2  | 0 | Low-quality    | Genome-fragment | NA | 6     | 0     |
| 514_extracted_k141_111483  | 2287  | No  | NA    | 2  | 0 | Low-quality    | Genome-fragment | NA | 2.9   | 0     |
| 57_vs_85488   full         | 1875  | No  | NA    | 0  | 0 | Not-determined | Genome-fragment | NA | 4.23  | 0     |
| 57_vs_111555   full        | 2287  | No  | NA    | 0  | 0 | Low-quality    | Genome-fragment | NA | 1.76  | 0     |
| 57_vs_85688   full         | 6208  | No  | NA    | 0  | 5 | Not-determined | Genome-fragment | NA | 1.44  | 0     |
| 56_vs_k141_17010   H2gene  | 2287  | No  | NA    | 1  | 0 | Low-quality    | Genome-fragment | NA | 59.67 | 0     |
| 58_vs_k141_202274          |       |     |       |    |   |                |                 |    |       |       |



|                            |       |    |    |    |   |                |                   |      |   |
|----------------------------|-------|----|----|----|---|----------------|-------------------|------|---|
| 514_extracted_k141_64411   | 2295  | No | NA | 0  | 2 | Low-quality    | Genome-fragment   | 5.46 | 0 |
| 55_vs_k141_65679  full     | 2295  | No | NA | 0  | 0 | Low-quality    | Genome-fragment   | 5.5  | 0 |
| 512_vs_k141_152693  full   | 2295  | No | NA | 2  | 0 | Low-quality    | Genome-fragment   | 6.1  | 0 |
| 57_vs_88206  full          | 1887  | No | NA | 0  | 1 | Not-determined | Genome-fragment   | NA   | 0 |
| 57_vs_88266  full          | 2480  | No | NA | 0  | 1 | Not-determined | Genome-fragment   | NA   | 0 |
| 515_extracted_74557        | 2295  | No | NA | 1  | 0 | Low-quality    | Genome-fragment   | 5.18 | 0 |
| 57_vs_88344  full          | 15282 | No | NA | 0  | 5 | Not-determined | Genome-fragment   | NA   | 0 |
| 57_vs_88373  full          | 1402  | No | NA | 0  | 1 | Not-determined | Genome-fragment   | NA   | 0 |
| 514_vs_k141_73809  H2gene  | 2296  | No | NA | 0  | 0 | Low-quality    | Genome-fragment   | 2.1  | 0 |
| 57_vs_88598  full          | 5135  | No | NA | 0  | 4 | Not-determined | Genome-fragment   | NA   | 0 |
| 57_vs_8076  full           | 2296  | No | NA | 0  | 0 | Low-quality    | Genome-fragment   | 6.64 | 0 |
| 57_vs_51783  full          | 2296  | No | NA | 0  | 0 | Low-quality    | Genome-fragment   | 4.2  | 0 |
| 57_vs_88779  full          | 3659  | No | NA | 0  | 1 | Not-determined | Genome-fragment   | NA   | 0 |
| 57_vs_88782  full          | 1800  | No | NA | 0  | 0 | Not-determined | Genome-fragment   | NA   | 0 |
| 57_vs_88873  full          | 1520  | No | NA | 0  | 0 | Not-determined | Genome-fragment   | NA   | 0 |
| 57_vs_116864  H2gene       | 2296  | No | NA | 1  | 0 | Low-quality    | Genome-fragment   | 5.53 | 0 |
| 57_vs_88912  full          | 2444  | No | NA | 0  | 2 | Not-determined | Genome-fragment   | NA   | 0 |
| 57_vs_88984  full          | 1347  | No | NA | 0  | 1 | Not-determined | Genome-fragment   | NA   | 0 |
| 516_vs_88378  full         | 2296  | No | NA | 2  | 0 | Low-quality    | Genome-fragment   | 1.38 | 0 |
| 57_vs_89090  full          | 4914  | No | NA | 0  | 4 | Not-determined | Genome-fragment   | NA   | 0 |
| 57_vs_89176  full          | 5075  | No | NA | 0  | 2 | Not-determined | Genome-fragment   | NA   | 0 |
| 58_extracted_k141_94235    | 2296  | No | NA | 0  | 3 | Low-quality    | Genome-fragment   | 5.82 | 0 |
| 58_vs_k141_205508  full    | 2296  | No | NA | 0  | 0 | Low-quality    | Genome-fragment   | 1.07 | 0 |
| 514_vs_k141_32345  full    | 2297  | No | NA | 0  | 0 | Low-quality    | Genome-fragment   | 1.25 | 0 |
| 514_vs_k141_70109  full    | 2297  | No | NA | 0  | 1 | Low-quality    | Genome-fragment   | 4.19 | 0 |
| 53_extracted_k141_80653    | 2297  | No | NA | 1  | 0 | Low-quality    | Genome-fragment   | 1.63 | 0 |
| 53_vs_k141_34263  full     | 2297  | No | NA | 2  | 0 | Low-quality    | Genome-fragment   | 6.63 | 0 |
| 57_vs_89601  full          | 2688  | No | NA | 0  | 1 | Not-determined | Genome-fragment   | NA   | 0 |
| 57_vs_89618  full          | 1704  | No | NA | 0  | 1 | Not-determined | Genome-fragment   | NA   | 0 |
| 516_vs_161186  full        | 2297  | No | NA | 0  | 0 | Low-quality    | Genome-fragment   | 6.43 | 0 |
| 57_vs_89746  full          | 3429  | No | NA | 0  | 3 | Not-determined | Genome-fragment   | NA   | 0 |
| 510_vs_89371  full         | 2297  | No | NA | 0  | 0 | Low-quality    | Genome-fragment   | 6.16 | 0 |
| 515_extracted_9664         | 2297  | No | NA | 1  | 0 | Low-quality    | Genome-fragment   | 1.29 | 0 |
| 58_vs_k141_150652  full    | 2297  | No | NA | 1  | 0 | Low-quality    | Genome-fragment   | 1.38 | 0 |
| 514_vs_k141_148662  full   | 2298  | No | NA | 0  | 0 | Low-quality    | Genome-fragment   | 4.52 | 0 |
| 514_vs_k141_83521  full    | 2299  | No | NA | 0  | 0 | Low-quality    | Genome-fragment   | 2.23 | 0 |
| 57_vs_90128  full          | 1483  | No | NA | 0  | 1 | Not-determined | Genome-fragment   | NA   | 0 |
| 57_vs_86675  full          | 2299  | No | NA | 0  | 0 | Low-quality    | Genome-fragment   | 4.68 | 0 |
| 512_vs_k141_155639  full   | 2299  | No | NA | 0  | 0 | Low-quality    | Genome-fragment   | 3.43 | 0 |
| 55_vs_k141_18610  full     | 2300  | No | NA | 1  | 0 | Low-quality    | Genome-fragment   | 4.45 | 0 |
| 57_vs_90391  full          | 1398  | No | NA | 0  | 2 | Not-determined | Genome-fragment   | NA   | 0 |
| 57_vs_90468  full          | 3160  | No | NA | 0  | 2 | Not-determined | Genome-fragment   | NA   | 0 |
| 57_vs_90565  full          | 4821  | No | NA | 0  | 3 | Not-determined | Genome-fragment   | NA   | 0 |
| 56_vs_k141_39628  full     | 2300  | No | NA | 1  | 0 | Low-quality    | Genome-fragment   | 0.93 | 0 |
| 57_vs_90627  full          | 2158  | No | NA | 0  | 0 | Not-determined | Genome-fragment   | NA   | 0 |
| 58_vs_k141_43522  full     | 2300  | No | NA | 0  | 0 | Low-quality    | Genome-fragment   | 6.42 | 0 |
| 57_vs_90763  full          | 1123  | No | NA | 0  | 0 | Not-determined | Genome-fragment   | NA   | 0 |
| 516_vs_165769  full        | 2301  | No | NA | 1  | 0 | Low-quality    | Genome-fragment   | 5.11 | 0 |
| 510_vs_59025  full         | 2301  | No | NA | 0  | 0 | Low-quality    | Genome-fragment   | 3.79 | 0 |
| 57_vs_90911  full          | 1651  | No | NA | 0  | 2 | Not-determined | Genome-fragment   | NA   | 0 |
| 57_vs_90915  full          | 45811 | No | NA | 30 | 0 | High-quality   | High-quality      | 100  | 0 |
| 58_extracted_k141_11654    | 2302  | No | NA | 3  | 0 | Low-quality    | Genome-fragment   | 8.12 | 0 |
| 58_extracted_k141_205835   | 2301  | No | NA | 3  | 0 | Low-quality    | Genome-fragment   | 5.1  | 0 |
| 57_vs_91036  full          | 1491  | No | NA | 0  | 0 | Not-determined | Genome-fragment   | NA   | 0 |
| 57_vs_91134  full          | 2325  | No | NA | 0  | 2 | Not-determined | Genome-fragment   | NA   | 0 |
| 51_vs_k141_105277  full    | 2302  | No | NA | 0  | 0 | Low-quality    | Genome-fragment   | 1.25 | 0 |
| 53_vs_k141_104664  full    | 2302  | No | NA | 1  | 0 | Low-quality    | Genome-fragment   | 4.46 | 0 |
| 57_vs_91332  full          | 1237  | No | NA | 0  | 2 | Not-determined | Genome-fragment   | NA   | 0 |
| 55_vs_k141_123815  full    | 2302  | No | NA | 0  | 1 | Low-quality    | Genome-fragment   | 0.74 | 0 |
| 57_vs_91445  full          | 5810  | No | NA | 0  | 3 | Not-determined | Genome-fragment   | NA   | 0 |
| 57_vs_42567  full          | 2302  | No | NA | 2  | 0 | Low-quality    | Genome-fragment   | 6.14 | 0 |
| 57_vs_91464  full          | 1370  | No | NA | 0  | 1 | Not-determined | Genome-fragment   | NA   | 0 |
| 57_vs_91496  full          | 4091  | No | NA | 0  | 1 | Not-determined | Genome-fragment   | NA   | 0 |
| 512_vs_k141_41936  full    | 2302  | No | NA | 0  | 1 | Low-quality    | Genome-fragment   | 5.49 | 0 |
| 53_vs_k141_124515  full    | 2303  | No | NA | 0  | 1 | Low-quality    | Genome-fragment   | 2.87 | 0 |
| 57_vs_91928  full          | 1896  | No | NA | 0  | 0 | Not-determined | Genome-fragment   | NA   | 0 |
| 52_vs_k141_20306  full     | 2303  | No | NA | 1  | 0 | Low-quality    | Genome-fragment   | 3.87 | 0 |
| 51_vs_k141_1928  full      | 2304  | No | NA | 0  | 0 | Low-quality    | Genome-fragment   | 1.21 | 0 |
| 57_vs_92014  full          | 1466  | No | NA | 0  | 0 | Not-determined | Genome-fragment   | NA   | 0 |
| 510_vs_78312  full         | 2304  | No | NA | 2  | 0 | Low-quality    | Genome-fragment   | 6.35 | 0 |
| 510_vs_49029  H2gene       | 2304  | No | NA | 2  | 0 | Low-quality    | Genome-fragment   | 3.86 | 0 |
| 57_vs_92109  full          | 2599  | No | NA | 0  | 0 | Not-determined | Genome-fragment   | NA   | 0 |
| 517_vs_k141_140639  full   | 2305  | No | NA | 0  | 2 | Low-quality    | Genome-fragment   | 3.17 | 0 |
| 517_vs_k141_137157  full   | 2305  | No | NA | 2  | 0 | Low-quality    | Genome-fragment   | 3.09 | 0 |
| 517_vs_k141_79768  full    | 2305  | No | NA | 0  | 0 | Low-quality    | Genome-fragment   | 3.32 | 0 |
| 57_vs_92303  full          | 1109  | No | NA | 0  | 1 | Not-determined | Genome-fragment   | NA   | 0 |
| 57_vs_92500  full          | 1777  | No | NA | 0  | 1 | Not-determined | Genome-fragment   | NA   | 0 |
| 57_vs_122166  full         | 2305  | No | NA | 2  | 0 | Low-quality    | Genome-fragment   | 3.86 | 0 |
| 57_vs_92560  full          | 2600  | No | NA | 2  | 0 | Not-determined | Genome-fragment   | NA   | 0 |
| 510_extracted_54842        | 2305  | No | NA | 0  | 0 | Low-quality    | Genome-fragment   | 6.19 | 0 |
| 512_vs_k141_77962  full    | 2305  | No | NA | 0  | 0 | Low-quality    | Genome-fragment   | 4.21 | 0 |
| 515_vs_63391  full         | 2305  | No | NA | 0  | 0 | Low-quality    | Genome-fragment   | 5.05 | 0 |
| 57_vs_92826  full          | 2063  | No | NA | 0  | 1 | Not-determined | Genome-fragment   | NA   | 0 |
| 57_vs_92923  full          | 7287  | No | NA | 0  | 4 | Not-determined | Genome-fragment   | NA   | 0 |
| 58_vs_k141_142296  full    | 2305  | No | NA | 0  | 1 | Low-quality    | Genome-fragment   | 0.67 | 0 |
| 510_vs_83963  full         | 2306  | No | NA | 0  | 1 | Low-quality    | Genome-fragment   | 1.25 | 0 |
| 57_vs_93037  full          | 1753  | No | NA | 0  | 0 | Not-determined | Genome-fragment   | NA   | 0 |
| 512_vs_k141_114590  full   | 2306  | No | NA | 0  | 1 | Low-quality    | Genome-fragment   | 2.03 | 0 |
| 515_vs_55584  full         | 2306  | No | NA | 0  | 0 | Low-quality    | Genome-fragment   | 1.38 | 0 |
| 57_vs_93098  full          | 8627  | No | NA | 0  | 9 | Not-determined | Genome-fragment   | NA   | 0 |
| 57_vs_93103  full          | 1999  | No | NA | 0  | 0 | Not-determined | Genome-fragment   | NA   | 0 |
| 57_vs_93151  full          | 2765  | No | NA | 0  | 1 | Not-determined | Genome-fragment   | NA   | 0 |
| 58_extracted_k141_138998   | 2306  | No | NA | 0  | 0 | Low-quality    | Genome-fragment   | 5.41 | 0 |
| 59_vs_k141_12769  full     | 2307  | No | NA | 0  | 0 | Low-quality    | Genome-fragment   | 3.96 | 0 |
| 511_vs_k141_22782  full    | 2307  | No | NA | 0  | 0 | Low-quality    | Genome-fragment   | 3.4  | 0 |
| 512_extracted_k141_67601   | 2307  | No | NA | 3  | 0 | Low-quality    | Genome-fragment   | 5.28 | 0 |
| 57_vs_93650  full          | 1948  | No | NA | 0  | 0 | Not-determined | Genome-fragment   | NA   | 0 |
| 58_vs_k141_192967  full    | 2307  | No | NA | 0  | 2 | Low-quality    | Genome-fragment   | 1.26 | 0 |
| 58_vs_k141_207007  full    | 2307  | No | NA | 0  | 2 | Low-quality    | Genome-fragment   | 1.26 | 0 |
| 53_extracted_k141_32176    | 2308  | No | NA | 0  | 1 | Low-quality    | Genome-fragment   | 1.25 | 0 |
| 57_vs_93948  full          | 5382  | No | NA | 0  | 4 | Not-determined | Genome-fragment   | NA   | 0 |
| 516_extracted_118713       | 2308  | No | NA | 0  | 0 | Low-quality    | Genome-fragment   | 5.27 | 0 |
| 516_vs_135033  full        | 2308  | No | NA | 0  | 0 | Low-quality    | Genome-fragment   | 3.98 | 0 |
| 512_extracted_k141_99986   | 2308  | No | NA | 0  | 0 | Low-quality    | Genome-fragment   | 6.51 | 0 |
| 57_vs_94107  full          | 7429  | No | NA | 0  | 6 | Not-determined | Genome-fragment   | NA   | 0 |
| 512_vs_k141_76024  full    | 2308  | No | NA | 0  | 1 | Low-quality    | Genome-fragment   | 4.39 | 0 |
| 58_vs_k141_46982  full     | 2308  | No | NA | 1  | 0 | Low-quality    | Genome-fragment   | 5.42 | 0 |
| 517_vs_k141_132303  full   | 2309  | No | NA | 0  | 0 | Low-quality    | Genome-fragment   | 2.08 | 0 |
| 59_vs_k141_24073  full     | 2309  | No | NA | 0  | 1 | Low-quality    | Genome-fragment   | 1.59 | 0 |
| 57_vs_94222  full          | 3071  | No | NA | 0  | 0 | Not-determined | Genome-fragment   | NA   | 0 |
| 59_vs_k141_12331  full     | 2309  | No | NA | 0  | 0 | Low-quality    | Genome-fragment   | 1.23 | 0 |
| 512_vs_k141_246231  full   | 2309  | No | NA | 0  | 0 | Low-quality    | Genome-fragment   | 1.28 | 0 |
| 514_vs_k141_77384  full    | 2310  | No | NA | 0  | 2 | Low-quality    | Genome-fragment   | 2.42 | 0 |
| 512_vs_k141_136568  H2gene | 2310  | No | NA | 1  | 0 | Low-quality    | Genome-fragment   | 4.45 | 0 |
| 58_extracted_k141_121482   | 2310  | No | NA | 1  | 0 | Low-quality    | Genome-fragment   | 4.91 | 0 |
| 57_vs_94543  full          | 1628  | No | NA | 0  | 1 | Not-determined | Genome-fragment   | NA   | 0 |
| 57_vs_94649  full          | 3048  | No | NA | 0  | 0 | Not-determined | Genome-fragment   | NA   | 0 |
| 517_vs_k141_2845  full     | 2311  | No | NA | 0  | 1 | Low-quality    | Genome-fragment   | 1.45 | 0 |
| 51_vs_k141_18093  full     | 2311  | No | NA | 0  | 0 | Low-quality    | Genome-fragment   | 1.93 | 0 |
| 53_extracted_k141_73490    | 2311  | No | NA | 1  | 0 | Low-quality    | Genome-fragment   | 3.98 | 0 |
| 516_vs_87963  full         | 2311  | No | NA | 4  | 0 | Low-quality    | Genome-fragment   | 4.22 | 0 |
| 57_vs_94938  full          | 3758  | No | NA | 0  | 0 | Not-determined | Genome-fragment   | NA   | 0 |
| 515_extracted_46223        | 2311  | No | NA | 0  | 0 | Low-quality    | Genome-fragment   | 2.36 | 0 |
| 57_vs_95072  full          | 2886  | No | NA | 0  | 2 | Not-determined | Genome-fragment   | NA   | 0 |
| 56_vs_k141_17782  full     | 2311  | No | NA | 0  | 0 | Low-quality    | Genome-fragment   | 2.63 | 0 |
| 57_vs_95186  full          | 1273  | No | NA | 0  | 1 | Not-determined | Genome-fragment   | NA   | 0 |
| 57_vs_95274  full          | 3700  | No | NA | 0  | 3 | Not-determined | Genome-fragment   | NA   | 0 |
| 56_vs_k141_52864  full     | 2311  | No | NA | 0  | 1 | Low-quality    | Genome-fragment   | 5.11 | 0 |
| 57_vs_95413  full          | 3854  | No | NA | 0  | 4 | Not-determined | Genome-fragment   | NA   | 0 |
| 57_vs_95438  full          | 1235  | No | NA | 0  | 0 | Not-determined | Genome-fragment   | NA   | 0 |
| 517_vs_k141_75709  full    | 2312  | No | NA | 0  | 1 | Low-quality    | Genome-fragment   | 0.6  | 0 |
| 57_vs_95761  full          | 2023  | No | NA | 0  | 0 | Not-determined | Genome-fragment   | NA   | 0 |
| 57_vs_95794  full          | 6879  | No | NA | 0  | 5 | Not-determined | Genome-fragment   | NA   | 0 |
| 57_vs_96036  full          | 1172  | No | NA | 0  | 2 | Not-determined | Genome-fragment   | NA   | 0 |
| 57_vs_96038  full          | 3228  | No | NA | 0  | 1 | Not-determined | Genome-fragment   | NA   | 0 |
| 59_vs_k141_17830  full     | 2312  | No | NA | 2  | 0 | Low-quality    | Genome-fragment   | 5.96 | 0 |
| 514_extracted_k141_108048  | 2312  | No | NA | 3  | 0 | Low-quality    | Genome-fragment   | 7.62 | 0 |
| 51_vs_k141_159698  full    | 2312  | No | NA | 1  | 0 | Low-quality    | Genome-fragment   | 1.46 | 0 |
| 57_vs_50886  full          | 2312  | No | NA | 1  | 0 | Low-quality    | Genome-fragment   | 1.46 | 0 |
| 57_vs_72036  full          | 2312  | No | NA | 3  | 0 | Low-quality    | Genome-fragment   | 5.06 | 0 |
| 57_vs_96549  full          | 1315  | No | NA | 0  | 0 | Not-determined | Genome-fragment   | NA   | 0 |
| 57_vs_96582  full          | 1524  | No | NA | 0  | 1 | Not-determined | Genome-fragment   | NA   | 0 |
| 510_extracted_52379        | 2312  | No | NA | 0  | 0 | Low-quality    | Genome-fragment   | 4.91 | 0 |
| 512_vs_k141_2171  full     | 2312  | No | NA | 0  | 1 | Low-quality    | Genome-fragment   | 3.89 | 0 |
| 57_vs_96646  full          | 1002  | No | NA | 0  | 1 | Not-determined | Genome-fragment   | NA   | 0 |
| 51_vs_k141_116811  full    | 2313  | No | NA | 0  | 1 | Low-quality    | Genome-fragment   | 6.48 | 0 |
| 57_vs_97017  full          | 2484  | No | NA | 0  | 3 | Not-determined | Genome-fragment</ |      |   |



|                           |            |       |     |      |    |    |                |                 |       |       |
|---------------------------|------------|-------|-----|------|----|----|----------------|-----------------|-------|-------|
| 51_vs_k141_128316         | [[full]]   | 2317  | No  | NA   | 2  | 0  | Low-quality    | Genome-fragment | 5.53  | 0     |
| 55_extracted_k141_20514   |            | 2317  | No  | NA   | 1  | 0  | Low-quality    | Genome-fragment | 4.39  | 0     |
| 55_vs_k141_104917         | [[full]]   | 2317  | No  | NA   | 0  | 1  | Low-quality    | Genome-fragment | 4.6   | 0     |
| 57_vs_136381              | [[full]]   | 2317  | No  | NA   | 1  | 0  | Low-quality    | Genome-fragment | 1.44  | 0     |
| 512_extracted_k141_184009 |            | 2317  | No  | NA   | 0  | 1  | Low-quality    | Genome-fragment | 1.39  | 0     |
| 58_extracted_k141_107289  |            | 2317  | No  | NA   | 0  | 0  | Low-quality    | Genome-fragment | 0.91  | 0     |
| 59_extracted_k141_73776   |            | 2318  | No  | NA   | 3  | 0  | Low-quality    | Genome-fragment | 7.64  | 0     |
| 57_vs_99014               | [[full]]   | 1382  | No  | NA   | 0  | 0  | Not-determined | Genome-fragment | NA    | 0     |
| 514_extracted_k141_85206  |            | 2318  | No  | NA   | 1  | 0  | Low-quality    | Genome-fragment | 5.43  | 0     |
| 58_vs_k141_117262         | [[full]]   | 2318  | No  | NA   | 2  | 0  | Low-quality    | Genome-fragment | 4.66  | 0     |
| 57_vs_99189               | [[full]]   | 1171  | No  | NA   | 0  | 1  | Not-determined | Genome-fragment | NA    | 0     |
| 57_vs_99275               | [[full]]   | 3804  | No  | NA   | 0  | 2  | Not-determined | Genome-fragment | NA    | 0     |
| 57_vs_99310               | [[full]]   | 1098  | No  | NA   | 0  | 0  | Not-determined | Genome-fragment | NA    | 0     |
| 57_vs_99361               | [[full]]   | 1003  | No  | NA   | 0  | 0  | Not-determined | Genome-fragment | NA    | 0     |
| 57_vs_84142               | [[full]]   | 2319  | No  | NA   | 1  | 0  | Low-quality    | Genome-fragment | 11.85 | 0     |
| 57_vs_90891               | [[full]]   | 2319  | Yes | 602  | 1  | 0  | Low-quality    | Genome-fragment | 0.69  | 74.04 |
| 57_vs_99598               | [[full]]   | 1803  | No  | NA   | 0  | 1  | Not-determined | Genome-fragment | NA    | 0     |
| 57_vs_99674               | [[full]]   | 3456  | No  | NA   | 0  | 2  | Not-determined | Genome-fragment | NA    | 0     |
| 58_vs_k141_18454          | [[full]]   | 2319  | No  | NA   | 3  | 0  | Low-quality    | Genome-fragment | 2.89  | 0     |
| 511_vs_k141_77759         | [[full]]   | 2320  | No  | NA   | 3  | 0  | Low-quality    | Genome-fragment | 5.45  | 0     |
| 513_vs_94564              | [[full]]   | 2320  | No  | NA   | 1  | 0  | Low-quality    | Genome-fragment | 4.92  | 0     |
| 514_extracted_k141_33851  |            | 2320  | No  | NA   | 3  | 0  | Low-quality    | Genome-fragment | 7.66  | 0     |
| 514_vs_k141_29966         | [[full]]   | 2320  | No  | NA   | 1  | 0  | Low-quality    | Genome-fragment | 5.23  | 0     |
| 514_vs_k141_19784         | [[full]]   | 2320  | No  | NA   | 2  | 0  | Low-quality    | Genome-fragment | 5.33  | 0     |
| 51_vs_k141_16823          | [[full]]   | 2320  | No  | NA   | 0  | 0  | Low-quality    | Genome-fragment | 5.92  | 0     |
| 57_vs_100285              | [[full]]   | 1023  | No  | NA   | 0  | 0  | Not-determined | Genome-fragment | NA    | 0     |
| 58_extracted_k141_85037   |            | 2320  | No  | NA   | 0  | 2  | Low-quality    | Genome-fragment | 0.12  | 0     |
| 58_vs_k141_12945          | [[full]]   | 2320  | No  | NA   | 0  | 2  | Low-quality    | Genome-fragment | 3.42  | 0     |
| 517_vs_k141_109209        | [[full]]   | 2321  | No  | NA   | 1  | 0  | Low-quality    | Genome-fragment | 4.67  | 0     |
| 57_vs_100640              | [[full]]   | 19185 | No  | NA   | 15 | 0  | Medium-quality | Genome-fragment | 54.87 | 0     |
| 513_extracted_45492       |            | 2321  | No  | NA   | 0  | 0  | Low-quality    | Genome-fragment | 2.49  | 0     |
| 513_extracted_84005       |            | 2321  | No  | NA   | 0  | 1  | Low-quality    | Genome-fragment | 5.03  | 0     |
| 57_vs_100677              | [[full]]   | 2378  | No  | NA   | 0  | 3  | Not-determined | Genome-fragment | NA    | 0     |
| 513_vs_123076             | [[full]]   | 2321  | No  | NA   | 0  | 0  | Low-quality    | Genome-fragment | 3.83  | 0     |
| NC1_vs_k141_2052          |            | 2321  | No  | NA   | 0  | 0  | Low-quality    | Genome-fragment | 4.33  | 0     |
| 516_vs_132294             | [[full]]   | 2321  | No  | NA   | 0  | 1  | Low-quality    | Genome-fragment | 1.01  | 0     |
| 57_vs_100830              | [[full]]   | 37520 | No  | NA   | 0  | 10 | Not-determined | Genome-fragment | NA    | 0     |
| 59_vs_k141_79890          | [[full]]   | 2322  | No  | NA   | 0  | 0  | Low-quality    | Genome-fragment | 4.9   | 0     |
| 57_vs_101006              | [[full]]   | 1145  | No  | NA   | 0  | 0  | Not-determined | Genome-fragment | NA    | 0     |
| 513_vs_19376              | [[full]]   | 2322  | No  | NA   | 0  | 1  | Low-quality    | Genome-fragment | 1.75  | 0     |
| 57_vs_101078              | [[full]]   | 2755  | No  | NA   | 0  | 2  | Not-determined | Genome-fragment | NA    | 0     |
| 514_extracted_k141_73587  |            | 2322  | No  | NA   | 0  | 0  | Low-quality    | Genome-fragment | 5.48  | 0     |
| 57_vs_101104              | [[full]]   | 2366  | No  | NA   | 0  | 2  | Not-determined | Genome-fragment | NA    | 0     |
| 57_vs_101221              | [[full]]   | 1949  | No  | NA   | 0  | 1  | Not-determined | Genome-fragment | NA    | 0     |
| 57_vs_101231              | [[full]]   | 1469  | No  | NA   | 0  | 1  | Not-determined | Genome-fragment | NA    | 0     |
| 516_vs_147941             | [[full]]   | 2322  | No  | NA   | 0  | 0  | Low-quality    | Genome-fragment | 5.16  | 0     |
| 510_vs_83898              | [[full]]   | 2322  | No  | NA   | 0  | 0  | Low-quality    | Genome-fragment | 3.12  | 0     |
| 57_vs_101267              | [[full]]   | 2515  | No  | NA   | 0  | 1  | Not-determined | Genome-fragment | NA    | 0     |
| 510_vs_56174              | [[full]]   | 2322  | No  | NA   | 0  | 0  | Low-quality    | Genome-fragment | 3.15  | 0     |
| 56_vs_k141_48163          | [[full]]   | 2322  | No  | NA   | 2  | 0  | Low-quality    | Genome-fragment | 4.42  | 0     |
| 57_vs_101456              | [[full]]   | 1668  | No  | NA   | 0  | 0  | Not-determined | Genome-fragment | NA    | 0     |
| 57_vs_101474              | [[full]]   | 2368  | No  | NA   | 0  | 2  | Not-determined | Genome-fragment | NA    | 0     |
| 58_vs_k141_40861          | [[full]]   | 2322  | No  | NA   | 2  | 0  | Low-quality    | Genome-fragment | 2.84  | 0     |
| 57_vs_101564              | [[full]]   | 1109  | No  | NA   | 0  | 0  | Not-determined | Genome-fragment | NA    | 0     |
| 514_vs_k141_64465         | [[full]]   | 2323  | No  | NA   | 0  | 0  | Low-quality    | Genome-fragment | 4.25  | 0     |
| 53_vs_k141_116184         | [[full]]   | 2323  | No  | NA   | 0  | 2  | Low-quality    | Genome-fragment | 1.84  | 0     |
| 55_extracted_k141_27652   |            | 2323  | No  | NA   | 4  | 0  | Low-quality    | Genome-fragment | 5.25  | 0     |
| 517_extracted_k141_1457   |            | 2324  | No  | NA   | 6  | 0  | Low-quality    | Genome-fragment | 7.64  | 0     |
| 57_vs_101714              | [[full]]   | 2082  | No  | NA   | 0  | 1  | Not-determined | Genome-fragment | NA    | 0     |
| 57_vs_101728              | [[full]]   | 6067  | No  | NA   | 0  | 3  | Not-determined | Genome-fragment | NA    | 0     |
| 57_vs_101751              | [[full]]   | 91169 | No  | NA   | 31 | 2  | High-quality   | High-quality    | 100   | 0     |
| 511_vs_k141_9904          | [[full]]   | 2324  | No  | NA   | 0  | 0  | Low-quality    | Genome-fragment | 1.56  | 0     |
| 57_vs_101815              | [[full]]   | 1130  | No  | NA   | 0  | 1  | Not-determined | Genome-fragment | NA    | 0     |
| 57_vs_101919              | [[full]]   | 9678  | No  | NA   | 0  | 4  | Not-determined | Genome-fragment | NA    | 0     |
| 514_vs_k141_49018         | [[full]]   | 2324  | No  | NA   | 0  | 1  | Low-quality    | Genome-fragment | 1.95  | 0     |
| 53_extracted_k141_65253   |            | 2324  | No  | NA   | 2  | 0  | Low-quality    | Genome-fragment | 36.07 | 0     |
| 57_vs_102072              | [[full]]   | 1941  | No  | NA   | 0  | 2  | Not-determined | Genome-fragment | NA    | 0     |
| 58_vs_k141_1564           | [[full]]   | 2324  | No  | NA   | 0  | 0  | Low-quality    | Genome-fragment | 2.71  | 0     |
| 57_vs_102125              | [[full]]   | 5910  | No  | NA   | 0  | 3  | Not-determined | Genome-fragment | NA    | 0     |
| 57_vs_102283              | [[full]]   | 2514  | No  | NA   | 0  | 2  | Not-determined | Genome-fragment | NA    | 0     |
| 517_vs_k141_143010        | [[H2gene]] | 2325  | No  | NA   | 1  | 0  | Low-quality    | Genome-fragment | 3.08  | 0     |
| 514_vs_k141_95659         | [[full]]   | 2325  | No  | NA   | 0  | 0  | Low-quality    | Genome-fragment | 3.91  | 0     |
| 53_vs_k141_14434          | [[full]]   | 2325  | No  | NA   | 1  | 0  | Low-quality    | Genome-fragment | 1.38  | 0     |
| 57_vs_102388              | [[full]]   | 2153  | No  | NA   | 0  | 1  | Not-determined | Genome-fragment | NA    | 0     |
| 55_extracted_k141_108741  |            | 2325  | No  | NA   | 0  | 2  | Low-quality    | Genome-fragment | 0.86  | 0     |
| 57_vs_102499              | [[full]]   | 6501  | No  | NA   | 0  | 0  | Not-determined | Genome-fragment | NA    | 0     |
| 55_vs_k141_33938          | [[full]]   | 2325  | No  | NA   | 0  | 2  | Low-quality    | Genome-fragment | 3.36  | 0     |
| 58_extracted_k141_123728  |            | 2325  | No  | NA   | 3  | 0  | Low-quality    | Genome-fragment | 8.2   | 0     |
| 513_vs_75626              | [[full]]   | 2326  | No  | NA   | 0  | 0  | Low-quality    | Genome-fragment | 4.59  | 0     |
| 51_extracted_k141_3375    |            | 2326  | No  | NA   | 0  | 0  | Low-quality    | Genome-fragment | 1.82  | 0     |
| 57_vs_k141_94199          | [[full]]   | 2326  | No  | NA   | 0  | 1  | Low-quality    | Genome-fragment | 1.02  | 0     |
| 57_vs_102807              | [[full]]   | 1573  | No  | NA   | 0  | 1  | Not-determined | Genome-fragment | NA    | 0     |
| 57_vs_102844              | [[full]]   | 1473  | No  | NA   | 0  | 0  | Not-determined | Genome-fragment | NA    | 0     |
| 55_vs_k141_6421           | [[full]]   | 2326  | No  | NA   | 3  | 0  | Low-quality    | Genome-fragment | 4.01  | 0     |
| 55_vs_k141_108213         | [[full]]   | 2326  | No  | NA   | 0  | 2  | Low-quality    | Genome-fragment | 3.58  | 0     |
| 512_extracted_k141_146946 |            | 2326  | No  | NA   | 0  | 0  | Low-quality    | Genome-fragment | 3.91  | 0     |
| 57_vs_103071              | [[full]]   | 4431  | No  | NA   | 0  | 4  | Not-determined | Genome-fragment | NA    | 0     |
| 57_vs_103093              | [[full]]   | 1130  | No  | NA   | 0  | 0  | Not-determined | Genome-fragment | NA    | 0     |
| 57_vs_103205              | [[full]]   | 3598  | No  | NA   | 0  | 0  | Not-determined | Genome-fragment | NA    | 0     |
| 57_vs_103208              | [[full]]   | 1427  | No  | NA   | 0  | 0  | Not-determined | Genome-fragment | NA    | 0     |
| 58_vs_k141_11347          | [[full]]   | 2326  | No  | NA   | 0  | 2  | Low-quality    | Genome-fragment | 1.46  | 0     |
| 517_vs_k141_168555        | [[full]]   | 2327  | No  | NA   | 0  | 0  | Low-quality    | Genome-fragment | 5.67  | 0     |
| 57_vs_103428              | [[full]]   | 4090  | No  | NA   | 0  | 0  | Not-determined | Genome-fragment | NA    | 0     |
| 59_vs_k141_76913          | [[full]]   | 2327  | No  | NA   | 1  | 0  | Low-quality    | Genome-fragment | 1.51  | 0     |
| 516_extracted_138590      |            | 2327  | No  | NA   | 0  | 0  | Low-quality    | Genome-fragment | 7.11  | 0     |
| 516_vs_144438             | [[full]]   | 2327  | No  | NA   | 0  | 0  | Low-quality    | Genome-fragment | 5.86  | 0     |
| 57_vs_103812              | [[full]]   | 2194  | No  | NA   | 0  | 3  | Not-determined | Genome-fragment | NA    | 0     |
| 56_vs_k141_30769          | [[full]]   | 2327  | No  | NA   | 0  | 0  | Low-quality    | Genome-fragment | 1.55  | 0     |
| 57_vs_103880              | [[full]]   | 1612  | No  | NA   | 0  | 0  | Not-determined | Genome-fragment | NA    | 0     |
| 517_vs_k141_141866        | [[full]]   | 2328  | No  | NA   | 1  | 0  | Low-quality    | Genome-fragment | 10.61 | 0     |
| 59_extracted_k141_44895   |            | 2328  | No  | NA   | 1  | 0  | Low-quality    | Genome-fragment | 3.34  | 0     |
| 57_vs_104193              | [[full]]   | 9686  | No  | NA   | 0  | 0  | Not-determined | Genome-fragment | NA    | 0     |
| 57_vs_104195              | [[full]]   | 2262  | No  | NA   | 0  | 0  | Not-determined | Genome-fragment | NA    | 0     |
| 57_vs_104204              | [[full]]   | 19616 | No  | NA   | 0  | 6  | Not-determined | Genome-fragment | NA    | 0     |
| 51_vs_k141_157181         | [[full]]   | 2328  | No  | NA   | 0  | 0  | Low-quality    | Genome-fragment | 3.69  | 0     |
| 511_vs_k141_13896         | [[full]]   | 2329  | No  | NA   | 0  | 0  | Low-quality    | Genome-fragment | 3.65  | 0     |
| 57_vs_104392              | [[full]]   | 1452  | No  | NA   | 0  | 0  | Not-determined | Genome-fragment | NA    | 0     |
| 57_vs_104493              | [[full]]   | 1009  | No  | NA   | 0  | 1  | Not-determined | Genome-fragment | NA    | 0     |
| 57_vs_104533              | [[full]]   | 5503  | No  | NA   | 0  | 3  | Not-determined | Genome-fragment | NA    | 0     |
| 57_vs_104555              | [[full]]   | 1615  | No  | NA   | 0  | 1  | Not-determined | Genome-fragment | NA    | 0     |
| 53_vs_k141_36707          | [[full]]   | 2329  | No  | NA   | 1  | 0  | Low-quality    | Genome-fragment | 5.72  | 0     |
| 55_vs_k141_14577          | [[full]]   | 2329  | No  | NA   | 0  | 0  | Low-quality    | Genome-fragment | 1.49  | 0     |
| 57_vs_34485               | [[full]]   | 2329  | No  | NA   | 0  | 2  | Low-quality    | Genome-fragment | 1.09  | 0     |
| 58_vs_k141_203581         | [[full]]   | 2329  | No  | NA   | 0  | 0  | Low-quality    | Genome-fragment | 5.5   | 0     |
| 57_vs_104779              | [[full]]   | 1246  | No  | NA   | 0  | 0  | Not-determined | Genome-fragment | NA    | 0     |
| 513_vs_120103             | [[full]]   | 2330  | Yes | 1326 | 2  | 1  | Low-quality    | Genome-fragment | 3.35  | 43.09 |
| 57_vs_104986              | [[full]]   | 1285  | No  | NA   | 0  | 2  | Not-determined | Genome-fragment | NA    | 0     |
| 57_vs_105009              | [[full]]   | 3211  | No  | NA   | 0  | 1  | Not-determined | Genome-fragment | NA    | 0     |
| 55_vs_k141_43665          | [[full]]   | 2330  | No  | NA   | 0  | 0  | Low-quality    | Genome-fragment | 1.49  | 0     |
| 57_vs_105147              | [[full]]   | 1322  | No  | NA   | 0  | 2  | Not-determined | Genome-fragment | NA    | 0     |
| 57_vs_105210              | [[full]]   | 2646  | No  | NA   | 0  | 1  | Not-determined | Genome-fragment | NA    | 0     |
| 516_vs_133019             | [[full]]   | 2330  | Yes | 892  | 1  | 0  | Low-quality    | Genome-fragment | 1.86  | 61.72 |
| 57_vs_105245              | [[full]]   | 1571  | No  | NA   | 0  | 1  | Not-determined | Genome-fragment | NA    | 0     |
| 512_vs_k141_8539          | [[full]]   | 2330  | No  | NA   | 2  | 0  | Low-quality    | Genome-fragment | 5.37  | 0     |
| 512_vs_k141_17157         | [[full]]   | 2330  | No  | NA   | 0  | 0  | Low-quality    | Genome-fragment | 2.64  | 0     |
| 56_extracted_k141_7145    |            | 2330  | No  | NA   | 0  | 2  | Low-quality    | Genome-fragment | 2.37  | 0     |
| 58_extracted_k141_186205  |            | 2330  | No  | NA   | 0  | 1  | Low-quality    | Genome-fragment | 4.35  | 0     |
| 53_vs_k141_111242         | [[full]]   | 2331  | No  | NA   | 0  | 0  | Low-quality    | Genome-fragment | 7.47  | 0     |
| 57_vs_105546              | [[full]]   | 2575  | No  | NA   | 0  | 1  | Not-determined | Genome-fragment | NA    | 0     |
| 57_vs_105752              | [[full]]   | 1813  | No  | NA   | 0  | 0  | Not-determined | Genome-fragment | NA    | 0     |
| 55_vs_k141_91122          | [[full]]   | 2331  | No  | NA   | 1  | 0  | Low-quality    | Genome-fragment | 5.97  | 0     |
| 57_vs_105855              | [[full]]   | 2609  | No  | NA   | 0  | 3  | Not-determined | Genome-fragment | NA    | 0     |
| 55_vs_k141_21844          | [[full]]   | 2331  | No  | NA   | 0  | 0  | Low-quality    | Genome-fragment | 5.87  | 0     |
| 57_vs_105921              | [[full]]   | 5417  | No  | NA   | 0  | 5  | Not-determined | Genome-fragment | NA    | 0     |
| 58_extracted_k141_73201   |            | 2331  | No  | NA   | 4  | 0  | Low-quality    | Genome-fragment | 5.37  | 0     |
| 57_vs_10                  |            |       |     |      |    |    |                |                 |       |       |



|                            |       |    |    |                |                 |                 |       |   |
|----------------------------|-------|----|----|----------------|-----------------|-----------------|-------|---|
| 59_vs_k141_28470  full     | 2336  | NA | 0  | 0              | Low-quality     | Genome-fragment | 4.5   | 0 |
| 57_vs_108378  full         | 2336  | NA | 0  | 0              | Not-determined  | Genome-fragment | NA    | 0 |
| 58_extracted_k141_168031   | 2336  | NA | 0  | 1              | Low-quality     | Genome-fragment | 0.64  | 0 |
| 517_vs_k141_145620  full   | 2337  | NA | 2  | 0              | Low-quality     | Genome-fragment | 5.49  | 0 |
| 51_vs_k141_122895  full    | 2337  | NA | 0  | 0              | Low-quality     | Genome-fragment | 4.84  | 0 |
| 51_vs_k141_125188  full    | 2337  | NA | 0  | 0              | Low-quality     | Genome-fragment | 2.25  | 0 |
| 57_vs_125063  full         | 2337  | NA | 0  | 1              | Low-quality     | Genome-fragment | 4.84  | 0 |
| 512_vs_k141_38763  full    | 2337  | NA | 1  | 0              | Low-quality     | Genome-fragment | 5.34  | 0 |
| 57_vs_108612  full         | 2694  | NA | 2  | Not-determined | Genome-fragment | NA              | 0     |   |
| 59_vs_k141_66562  full     | 2338  | NA | 0  | 1              | Low-quality     | Genome-fragment | 1.39  | 0 |
| 517_vs_k141_147428  full   | 2339  | NA | 1  | 0              | Low-quality     | Genome-fragment | 5.83  | 0 |
| 511_vs_k141_33272  full    | 2339  | NA | 0  | 0              | Low-quality     | Genome-fragment | 4.09  | 0 |
| 57_vs_108833  full         | 3236  | NA | 0  | 0              | Not-determined  | Genome-fragment | NA    | 0 |
| 57_vs_108887  full         | 6639  | NA | 0  | 1              | Not-determined  | Genome-fragment | NA    | 0 |
| 514_extracted_k141_112738  | 2339  | NA | 2  | 0              | Low-quality     | Genome-fragment | 3.9   | 0 |
| 57_vs_108953  full         | 2153  | NA | 0  | 0              | Not-determined  | Genome-fragment | NA    | 0 |
| 514_vs_k141_44973  H2gene  | 2339  | NA | 2  | 0              | Low-quality     | Genome-fragment | 5.3   | 0 |
| 51_vs_k141_120598  full    | 2339  | NA | 1  | 0              | Low-quality     | Genome-fragment | 3.98  | 0 |
| 55_vs_k141_461255  full    | 2339  | NA | 0  | 0              | Low-quality     | Genome-fragment | 0.84  | 0 |
| 58_extracted_k141_177554   | 2339  | NA | 0  | 1              | Low-quality     | Genome-fragment | 2.26  | 0 |
| 53_vs_k141_63113  full     | 2340  | NA | 0  | 1              | Low-quality     | Genome-fragment | 4.57  | 0 |
| 57_vs_109354  full         | 2624  | NA | 0  | 2              | Not-determined  | Genome-fragment | NA    | 0 |
| 57_vs_109489  full         | 3488  | NA | 0  | 2              | Not-determined  | Genome-fragment | NA    | 0 |
| 57_vs_109582  full         | 1308  | NA | 0  | 0              | Not-determined  | Genome-fragment | NA    | 0 |
| 55_vs_k141_22420  full     | 2340  | NA | 2  | 0              | Low-quality     | Genome-fragment | 4.37  | 0 |
| 57_vs_101060  full         | 2340  | NA | 0  | 0              | Low-quality     | Genome-fragment | 5.58  | 0 |
| 516_vs_119128  full        | 2340  | NA | 0  | 2              | Low-quality     | Genome-fragment | 6.24  | 0 |
| 510_vs_30069  full         | 2340  | NA | 2  | 0              | Low-quality     | Genome-fragment | 1.67  | 0 |
| 57_vs_110887  full         | 1217  | NA | 1  | Not-determined | Genome-fragment | NA              | 0     |   |
| 58_vs_k141_131207  full    | 2340  | NA | 2  | 0              | Low-quality     | Genome-fragment | 1.46  | 0 |
| 517_vs_k141_42418  full    | 2341  | NA | 0  | 2              | Low-quality     | Genome-fragment | 1.66  | 0 |
| 57_vs_109912  full         | 21032 | NA | 2  | Not-determined | Genome-fragment | NA              | 0     |   |
| 57_vs_110024  full         | 2650  | NA | 0  | 1              | Not-determined  | Genome-fragment | NA    | 0 |
| 513_vs_70940  full         | 2341  | NA | 0  | 5              | Low-quality     | Genome-fragment | 0.87  | 0 |
| 57_vs_110141  full         | 1668  | NA | 0  | 0              | Not-determined  | Genome-fragment | NA    | 0 |
| 55_vs_k141_11520  full     | 2341  | NA | 0  | 0              | Low-quality     | Genome-fragment | 3.7   | 0 |
| 513_vs_19427  full         | 2342  | NA | 0  | 1              | Low-quality     | Genome-fragment | 1.14  | 0 |
| 57_vs_110291  full         | 4189  | NA | 0  | 0              | Not-determined  | Genome-fragment | NA    | 0 |
| 57_vs_110321  full         | 1462  | NA | 0  | 0              | Not-determined  | Genome-fragment | NA    | 0 |
| 512_vs_k141_24929  full    | 2342  | NA | 0  | 2              | Low-quality     | Genome-fragment | 2.79  | 0 |
| 515_vs_40326  full         | 2342  | NA | 0  | 2              | Low-quality     | Genome-fragment | 1.07  | 0 |
| 56_vs_k141_116244  full    | 2342  | NA | 1  | 1              | Low-quality     | Genome-fragment | 1.49  | 0 |
| 53_vs_k141_95043  full     | 2343  | NA | 1  | 0              | Low-quality     | Genome-fragment | 4.66  | 0 |
| 57_vs_110778  full         | 3718  | NA | 0  | 3              | Not-determined  | Genome-fragment | NA    | 0 |
| 57_vs_110824  full         | 2720  | NA | 0  | 1              | Not-determined  | Genome-fragment | NA    | 0 |
| 59_extracted_k141_73062    | 2344  | NA | 0  | 0              | Low-quality     | Genome-fragment | 7.72  | 0 |
| 57_vs_110932  full         | 3231  | NA | 0  | 3              | Not-determined  | Genome-fragment | NA    | 0 |
| 51_vs_k141_58289  full     | 2344  | NA | 0  | 0              | Low-quality     | Genome-fragment | 5.25  | 0 |
| 55_vs_k141_12806  full     | 2344  | NA | 0  | 0              | Low-quality     | Genome-fragment | 5.55  | 0 |
| 510_vs_76493  full         | 2344  | NA | 0  | 0              | Low-quality     | Genome-fragment | 4.23  | 0 |
| 58_vs_k141_152503  full    | 2344  | NA | 3  | 0              | Low-quality     | Genome-fragment | 6.21  | 0 |
| 57_vs_111205  full         | 1555  | NA | 2  | Not-determined | Genome-fragment | NA              | 0     |   |
| 514_extracted_k141_80575   | 2345  | NA | 3  | 0              | Low-quality     | Genome-fragment | 7.7   | 0 |
| 57_vs_111545  full         | 1278  | NA | 0  | 1              | Not-determined  | Genome-fragment | NA    | 0 |
| 55_extracted_k141_66337    | 2345  | NA | 2  | 0              | Low-quality     | Genome-fragment | 1.25  | 0 |
| 56_vs_k141_16815  full     | 2345  | NA | 0  | 0              | Low-quality     | Genome-fragment | 6.46  | 0 |
| 57_vs_111617  full         | 1435  | NA | 0  | 0              | Not-determined  | Genome-fragment | NA    | 0 |
| 511_extracted_k141_10104   | 2346  | NA | 3  | 0              | Low-quality     | Genome-fragment | 4.66  | 0 |
| 57_vs_111831  full         | 3406  | NA | 21 | 1              | High-quality    | Genome-fragment | 97.46 | 0 |
| 57_vs_111863  full         | 2005  | NA | 0  | 0              | Not-determined  | Genome-fragment | NA    | 0 |
| 57_vs_111879  full         | 2555  | NA | 0  | 1              | Not-determined  | Genome-fragment | NA    | 0 |
| 513_vs_14338  full         | 2346  | NA | 0  | 0              | Low-quality     | Genome-fragment | 5.49  | 0 |
| 57_vs_112015  full         | 1970  | NA | 0  | 1              | Not-determined  | Genome-fragment | NA    | 0 |
| 55_vs_k141_42797  full     | 2346  | NA | 4  | 0              | Low-quality     | Genome-fragment | 4.64  | 0 |
| 516_vs_45491  full         | 2346  | NA | 1  | 0              | Low-quality     | Genome-fragment | 5.83  | 0 |
| 57_vs_112328  full         | 2781  | NA | 0  | 0              | Not-determined  | Genome-fragment | NA    | 0 |
| 511_vs_k141_102860  full   | 2347  | NA | 2  | 0              | Low-quality     | Genome-fragment | 3.63  | 0 |
| 57_vs_112419  full         | 2172  | NA | 0  | 1              | Not-determined  | Genome-fragment | NA    | 0 |
| 514_vs_k141_84319  full    | 2347  | NA | 1  | 1              | Low-quality     | Genome-fragment | 5.68  | 0 |
| 516_vs_21843  full         | 2347  | NA | 1  | 0              | Low-quality     | Genome-fragment | 5.99  | 0 |
| 57_vs_112689  full         | 2046  | NA | 0  | 0              | Not-determined  | Genome-fragment | NA    | 0 |
| 57_vs_112762  full         | 1405  | NA | 0  | 0              | Not-determined  | Genome-fragment | NA    | 0 |
| 516_vs_129478  full        | 2347  | NA | 0  | 0              | Low-quality     | Genome-fragment | 4.55  | 0 |
| 510_vs_103958  full        | 2347  | NA | 0  | 3              | Low-quality     | Genome-fragment | 1.78  | 0 |
| 512_extracted_k141_141604  | 2347  | NA | 1  | 1              | Low-quality     | Genome-fragment | 3.61  | 0 |
| 57_vs_112960  full         | 1254  | NA | 0  | 0              | Not-determined  | Genome-fragment | NA    | 0 |
| 59_vs_k141_6474  full      | 2348  | NA | 1  | 0              | Low-quality     | Genome-fragment | 4.77  | 0 |
| 511_vs_k141_65657  full    | 2348  | NA | 0  | 3              | Low-quality     | Genome-fragment | 1.08  | 0 |
| 57_vs_54716  full          | 2348  | NA | 0  | 0              | Low-quality     | Genome-fragment | 0.86  | 0 |
| 512_vs_k141_164578  H2gene | 2348  | NA | 1  | 0              | Low-quality     | Genome-fragment | 5.36  | 0 |
| 57_vs_113141  full         | 3488  | NA | 0  | 0              | Not-determined  | Genome-fragment | NA    | 0 |
| 57_vs_261691  full         | 2349  | NA | 0  | 0              | Low-quality     | Genome-fragment | 6.79  | 0 |
| 57_vs_113221  full         | 1355  | NA | 0  | 0              | Not-determined  | Genome-fragment | NA    | 0 |
| 516_extracted_1226545      | 2349  | NA | 1  | 0              | Low-quality     | Genome-fragment | 3.86  | 0 |
| 516_vs_141753  full        | 2349  | NA | 2  | 2              | Low-quality     | Genome-fragment | 1.12  | 0 |
| 57_vs_113482  full         | 9921  | NA | 0  | 4              | Not-determined  | Genome-fragment | NA    | 0 |
| 510_vs_62141  full         | 2349  | NA | 0  | 0              | Low-quality     | Genome-fragment | 2.78  | 0 |
| 57_vs_113547  full         | 3180  | NA | 0  | 1              | Not-determined  | Genome-fragment | NA    | 0 |
| 512_extracted_k141_118891  | 2349  | NA | 0  | 0              | Low-quality     | Genome-fragment | 3.93  | 0 |
| 57_vs_113750  full         | 1688  | NA | 0  | 0              | Not-determined  | Genome-fragment | NA    | 0 |
| 512_extracted_k141_92898   | 2349  | NA | 2  | 0              | Low-quality     | Genome-fragment | 7.74  | 0 |
| 58_vs_k141_102064  H2gene  | 2349  | NA | 1  | 0              | Low-quality     | Genome-fragment | 5.44  | 0 |
| 57_vs_113889  full         | 1383  | NA | 0  | 1              | Not-determined  | Genome-fragment | NA    | 0 |
| 51_extracted_k141_25101    | 2350  | NA | 0  | 0              | Low-quality     | Genome-fragment | 1.28  | 0 |
| 57_vs_113809  full         | 2350  | NA | 0  | 0              | Low-quality     | Genome-fragment | 1     | 0 |
| 57_vs_114238  full         | 2071  | NA | 0  | 1              | Not-determined  | Genome-fragment | NA    | 0 |
| 516_vs_77554  full         | 2350  | NA | 0  | 0              | Low-quality     | Genome-fragment | 4.47  | 0 |
| 512_vs_k141_43222  full    | 2350  | NA | 1  | 0              | Low-quality     | Genome-fragment | 5.88  | 0 |
| 57_extracted_125045        | 2351  | NA | 0  | 0              | Low-quality     | Genome-fragment | 5.88  | 0 |
| 57_vs_114402  full         | 2515  | NA | 0  | 1              | Not-determined  | Genome-fragment | NA    | 0 |
| 57_vs_114588  full         | 1025  | NA | 0  | 0              | Not-determined  | Genome-fragment | NA    | 0 |
| 57_vs_114590  full         | 1133  | NA | 0  | 0              | Not-determined  | Genome-fragment | NA    | 0 |
| 57_vs_114633  full         | 1542  | NA | 0  | 3              | Not-determined  | Genome-fragment | NA    | 0 |
| 57_vs_114700  full         | 1350  | NA | 0  | 0              | Not-determined  | Genome-fragment | NA    | 0 |
| 516_vs_101203  full        | 2351  | NA | 0  | 0              | Low-quality     | Genome-fragment | 39.98 | 0 |
| 517_vs_k141_55825  full    | 2352  | NA | 0  | 1              | Low-quality     | Genome-fragment | 1.07  | 0 |
| 57_vs_114809  full         | 3233  | NA | 0  | 3              | Not-determined  | Genome-fragment | NA    | 0 |
| 51_extracted_k141_157133   | 2352  | NA | 0  | 0              | Low-quality     | Genome-fragment | 0.62  | 0 |
| 516_extracted_51510        | 2352  | NA | 0  | 2              | Low-quality     | Genome-fragment | 1.3   | 0 |
| 510_vs_14839  full         | 2352  | NA | 0  | 0              | Low-quality     | Genome-fragment | 4.29  | 0 |
| 57_vs_114943  full         | 5441  | NA | 0  | 1              | Not-determined  | Genome-fragment | NA    | 0 |
| 57_vs_115095  full         | 4527  | NA | 0  | 1              | Not-determined  | Genome-fragment | NA    | 0 |
| 57_vs_115098  full         | 5095  | NA | 0  | 5              | Not-determined  | Genome-fragment | NA    | 0 |
| 57_vs_115102  full         | 4453  | NA | 0  | 4              | Not-determined  | Genome-fragment | NA    | 0 |
| 57_vs_115129  full         | 1205  | NA | 1  | 1              | Low-quality     | Genome-fragment | NA    | 0 |
| 510_vs_104037  full        | 2352  | NA | 0  | 0              | Low-quality     | Genome-fragment | 2.41  | 0 |
| 58_vs_k141_58570  full     | 2352  | NA | 0  | 2              | Low-quality     | Genome-fragment | 2.84  | 0 |
| 517_vs_k141_55692  full    | 2353  | NA | 0  | 0              | Low-quality     | Genome-fragment | 4.04  | 0 |
| 57_vs_115421  full         | 1867  | NA | 0  | 0              | Not-determined  | Genome-fragment | NA    | 0 |
| 57_vs_115641  full         | 3458  | NA | 0  | 1              | Not-determined  | Genome-fragment | NA    | 0 |
| 57_vs_115651  full         | 2644  | NA | 0  | 0              | Not-determined  | Genome-fragment | NA    | 0 |
| 516_extracted_64680        | 2353  | NA | 0  | 0              | Low-quality     | Genome-fragment | 4.1   | 0 |
| 57_vs_115900  full         | 1063  | NA | 0  | 0              | Not-determined  | Genome-fragment | NA    | 0 |
| 516_vs_35255  full         | 2353  | NA | 1  | 0              | Low-quality     | Genome-fragment | 6.14  | 0 |
| 57_vs_116018  full         | 1097  | NA | 1  | 1              | Not-determined  | Genome-fragment | NA    | 0 |
| 516_vs_42319  full         | 2353  | NA | 4  | 0              | Low-quality     | Genome-fragment | 4.77  | 0 |
| 54_extracted_11978         | 2353  | NA | 2  | 0              | Low-quality     | Genome-fragment | 7.75  | 0 |
| 57_vs_116335  full         | 5675  | NA | 0  | 3              | Not-determined  | Genome-fragment | NA    | 0 |
| 57_vs_116446  full         | 1378  | NA | 0  | 0              | Not-determined  | Genome-fragment | NA    | 0 |
| 59_vs_k141_18505  full     | 2354  | NA | 0  | 1              | Low-quality     | Genome-fragment | 4.14  | 0 |
| 511_extracted_k141_65795   | 2354  | NA | 0  | 0              | Low-quality     | Genome-fragment | 0.91  | 0 |
| 57_vs_116553  full         | 2353  | NA | 0  | 0              | Not-determined  | Genome-fragment | NA    | 0 |
| 57_vs_47228  full          | 2354  | NA | 2  | 0              | Low-quality     | Genome-fragment | 6.54  | 0 |
| 57_vs_116704  full         | 3839  | NA | 0  | 2              | Not-determined  | Genome-fragment | NA    | 0 |
| 57_vs_67286  full          | 2354  | NA | 0  | 0              | Low-quality     | Genome-fragment | 5.8   | 0 |
| 57_vs_116801  full         | 1314  | NA | 0  | 2              | Not-determined  | Genome-fragment | NA    | 0 |
| 57_vs_116816  full         | 2866  | NA | 0  | 1              | Not-determined  | Genome-fragment | NA    | 0 |
| 57_vs_116963  full         | 3143  | NA | 0  | 1              | Not-determined  | Genome-fragment | NA    | 0 |
| 516_vs_79760  full         | 2354  | NA | 2  | 0              | Low-quality     | Genome-fragment | 6.58  | 0 |
| 57_vs_117104  full         | 6591  | NA | 0  | 4              | Not-determined  | Genome-fragment | NA    | 0 |
| 57_vs_117140  full         | 6040  | NA | 0  | 2              | Not-determined  | Genome-fragment | NA    | 0 |
| 57_vs_117304  full         | 1078  | NA | 0  | 1              | Not-determined  | Genome-fragment | NA    | 0 |
| 57_vs_117378  full         | 1511  | NA | 0  | 1              | Not-determined  | Genome-fragment | NA    | 0 |
| 513_vs_37066  full         | 2355  | NA | 1  | 0              | Low-quality     | Genome-fragment | 1.8   | 0 |
| 57_vs_117474  full         | 1862  | NA | 1  | 1              | Not-determined  | Genome-fragment | NA    | 0 |
| 57_vs_117574  full         | 2024  | NA | 0  | 2              | Not-determined  | Genome-fragment | NA    | 0 |
| 51_extracted_k141_22669    | 2355  | NA | 0  | 1              | Low-quality     | Genome-fragment | 0.65  | 0 |
| 53_extracted_k141_41651    | 2355  | NA | 0  | 0              | Low-quality     | Genome-fragment | 7.77  | 0 |
| 58_extracted_k141_147052   | 2355  | NA | 3  | 0              | Low-quality     | Genome-fragment | 10.72 | 0 |
| 58_vs_k141_147289  full    | 2355  | NA | 0  | 1              | Low-quality     | Genome-fragment | 1.48  | 0 |
| 57_vs_117804  full         | 2356  | NA | 0  | 1              | Not-determined  | Genome-fragment | NA    | 0 |
| 57_vs_117875  full         | 5386  | NA | 0  | 1              | Not-determined  | Genome-fragment | NA    | 0 |
| 53_vs_k141_26476  full     | 2356  | NA | 2  | 0              | Low-quality     | Genome-fragment | 5     | 0 |
| 53_vs_k141_15002  full     | 2356  | NA | 1  | 0              | Low-quality     | Genome-fragment | 5.19  | 0 |
| 511_vs_k14                 |       |    |    |                |                 |                 |       |   |



|                            |          |       |     |    |       |                |                 |                 |                 |       |       |
|----------------------------|----------|-------|-----|----|-------|----------------|-----------------|-----------------|-----------------|-------|-------|
| 57_vs_119103               | [full]   | 2550  | No  | NA | 0     | 2              | Not-determined  | Genome-fragment | NA              | 0     | 0     |
| 517_vs_1141_52876          | [full]   | 2360  | No  | NA | 0     | 0              | Low-quality     | Genome-fragment | NA              | 3.16  | 0     |
| 57_vs_119101               | [full]   | 2774  | No  | NA | 0     | 1              | Not-determined  | Genome-fragment | NA              | 0     | 0     |
| 51_vs_14141_34904          | [full]   | 2360  | No  | NA | 0     | 1              | Low-quality     | Genome-fragment | NA              | 1.46  | 0     |
| 55_vs_14141_34708          | [full]   | 2360  | No  | NA | 1     | 0              | Low-quality     | Genome-fragment | NA              | 6.15  | 0     |
| 57_vs_119469               | [full]   | 1133  | No  | NA | 0     | 1              | Not-determined  | Genome-fragment | NA              | 0     | 0     |
| 57_vs_114424               | [full]   | 2360  | No  | NA | 3     | 0              | Low-quality     | Genome-fragment | NA              | 5.31  | 0     |
| 57_vs_119492               | [full]   | 13185 | No  | NA | 6     | 0              | Medium-quality  | Genome-fragment | NA              | 66.91 | 0     |
| 516_vs_123820              | [full]   | 2360  | No  | NA | 0     | 0              | Low-quality     | Genome-fragment | NA              | 1.57  | 0     |
| 57_vs_119507               | [full]   | 2529  | No  | NA | 0     | 3              | Not-determined  | Genome-fragment | NA              | 0     | 0     |
| 57_vs_119679               | [full]   | 51206 | Yes | NA | 40433 | 14             | 8               | High-quality    | High-quality    | 100   | 21.04 |
| 58_vs_14141_54484          | [full]   | 2360  | No  | NA | 0     | 0              | Low-quality     | Genome-fragment | NA              | 3.08  | 0     |
| 57_vs_119759               | [full]   | 1733  | No  | NA | 0     | 0              | Not-determined  | Genome-fragment | NA              | 0     | 0     |
| 57_vs_119779               | [full]   | 1491  | No  | NA | 0     | 2              | Not-determined  | Genome-fragment | NA              | 0     | 0     |
| 59_vs_14141_3046           | [full]   | 2361  | No  | NA | 1     | 0              | Low-quality     | Genome-fragment | NA              | 1.24  | 0     |
| 516_extracted_7282         |          | 2361  | No  | NA | 0     | 0              | Low-quality     | Genome-fragment | NA              | 2.17  | 0     |
| 57_vs_119916               | [full]   | 5627  | No  | NA | 0     | 3              | Not-determined  | Genome-fragment | NA              | 0     | 0     |
| 57_vs_119930               | [full]   | 5967  | No  | NA | 0     | 3              | Not-determined  | Genome-fragment | NA              | 0     | 0     |
| 511_vs_14141_79551         | [full]   | 2362  | No  | NA | 0     | 1              | Low-quality     | Genome-fragment | NA              | 4.46  | 0     |
| 511_vs_14141_22668         | [full]   | 2362  | No  | NA | 0     | 1              | Low-quality     | Genome-fragment | NA              | 1.64  | 0     |
| 57_vs_33566                | [full]   | 2362  | No  | NA | 0     | 0              | Low-quality     | Genome-fragment | NA              | 5.26  | 0     |
| 516_extracted_39280        |          | 2362  | No  | NA | 0     | 1              | Low-quality     | Genome-fragment | NA              | 5.07  | 0     |
| 512_vs_14141_27754         | [full]   | 2362  | No  | NA | 0     | 0              | Low-quality     | Genome-fragment | NA              | 4.28  | 0     |
| 57_vs_120207               | [full]   | 2006  | No  | NA | 0     | 0              | Not-determined  | Genome-fragment | NA              | 0     | 0     |
| 58_vs_14141_17896          | [full]   | 2362  | No  | NA | 0     | 0              | Low-quality     | Genome-fragment | NA              | 4.92  | 0     |
| 57_vs_120402               | [full]   | 1287  | No  | NA | 0     | 3              | Not-determined  | Genome-fragment | NA              | 0     | 0     |
| 517_vs_14141_31100         | [full]   | 2363  | No  | NA | 1     | 0              | Low-quality     | Genome-fragment | NA              | 3.52  | 0     |
| 57_vs_120520               | [full]   | 1426  | No  | NA | 0     | 0              | Not-determined  | Genome-fragment | NA              | 0     | 0     |
| 57_vs_120600               | [full]   | 1562  | No  | NA | 1     | Not-determined | Genome-fragment | NA              | 0               | 0     |       |
| 57_vs_120951               | [full]   | 1083  | No  | NA | 0     | 0              | Not-determined  | Genome-fragment | NA              | 0     | 0     |
| 53_vs_14141_71992          | [full]   | 2363  | No  | NA | 0     | 0              | Low-quality     | Genome-fragment | NA              | 1.5   | 0     |
| 57_vs_120988               | [full]   | 4189  | No  | NA | 0     | 0              | Not-determined  | Genome-fragment | NA              | 0     | 0     |
| 57_vs_121153               | [full]   | 1213  | No  | NA | 0     | 1              | Not-determined  | Genome-fragment | NA              | 0     | 0     |
| 58_extracted_14141_71153   |          | 2363  | Yes | NA | 662   | 1              | 1               | Low-quality     | Genome-fragment | 0.36  | 71.98 |
| 55_vs_14141_56099          | [full]   | 2364  | No  | NA | 2     | 0              | Low-quality     | Genome-fragment | NA              | 7.5   | 0     |
| 58_vs_14141_43865          | [full]   | 2364  | No  | NA | 1     | 0              | Low-quality     | Genome-fragment | NA              | 1.11  | 0     |
| 58_vs_14141_183160         | [full]   | 2364  | No  | NA | 0     | 0              | Low-quality     | Genome-fragment | NA              | 1.76  | 0     |
| 57_vs_121568               | [full]   | 1557  | No  | NA | 0     | 0              | Not-determined  | Genome-fragment | NA              | 0     | 0     |
| 57_vs_121569               | [full]   | 1896  | No  | NA | 0     | 0              | Not-determined  | Genome-fragment | NA              | 0     | 0     |
| 57_vs_121611               | [full]   | 1253  | No  | NA | 0     | 1              | Not-determined  | Genome-fragment | NA              | 0     | 0     |
| 58_vs_14141_24203          | [full]   | 2364  | No  | NA | 1     | 0              | Low-quality     | Genome-fragment | NA              | 7.29  | 0     |
| 57_vs_121718               | [full]   | 2898  | No  | NA | 2     | Not-determined | Genome-fragment | NA              | 0               | 0     |       |
| 57_vs_121764               | [full]   | 3820  | No  | NA | 0     | 1              | Not-determined  | Genome-fragment | NA              | 0     | 0     |
| 57_vs_121865               | [full]   | 1764  | No  | NA | 0     | 0              | Not-determined  | Genome-fragment | NA              | 0     | 0     |
| 511_extracted_14141_20760  |          | 2365  | No  | NA | 1     | 0              | Low-quality     | Genome-fragment | NA              | 3.37  | 0     |
| 57_vs_121864               | [full]   | 2770  | No  | NA | 0     | 2              | Not-determined  | Genome-fragment | NA              | 0     | 0     |
| 57_vs_122151               | [full]   | 33897 | No  | NA | 19    | 0              | High-quality    | High-quality    | 99.99           | 0     |       |
| 57_vs_121807               | [full]   | 2365  | No  | NA | 0     | 0              | Low-quality     | Genome-fragment | NA              | 6.37  | 0     |
| 57_vs_122165               | [full]   | 2969  | No  | NA | 0     | 1              | Not-determined  | Genome-fragment | NA              | 0     | 0     |
| 57_vs_122169               | [full]   | 4750  | No  | NA | 0     | 2              | Not-determined  | Genome-fragment | NA              | 0     | 0     |
| 515_vs_67510               | [full]   | 2365  | No  | NA | 1     | 0              | Low-quality     | Genome-fragment | NA              | 5.26  | 0     |
| 58_vs_14141_52948          | [full]   | 2365  | No  | NA | 0     | 0              | Low-quality     | Genome-fragment | NA              | 4.93  | 0     |
| 57_vs_122334               | [full]   | 2056  | No  | NA | 0     | 0              | Not-determined  | Genome-fragment | NA              | 0     | 0     |
| 512_vs_14141_185480        | [full]   | 2366  | No  | NA | 3     | 0              | Low-quality     | Genome-fragment | NA              | 6.07  | 0     |
| 58_vs_14141_149786         | [full]   | 2366  | No  | NA | 1     | 0              | Low-quality     | Genome-fragment | NA              | 5.69  | 0     |
| 57_vs_122424               | [full]   | 1232  | No  | NA | 1     | 1              | Not-determined  | Genome-fragment | NA              | 0     | 0     |
| 514_vs_14141_321           | [H2gene] | 2367  | No  | NA | 1     | 0              | Low-quality     | Genome-fragment | NA              | 1.5   | 0     |
| 51_vs_14141_140356         | [full]   | 2367  | No  | NA | 2     | 0              | Low-quality     | Genome-fragment | NA              | 7.81  | 0     |
| 53_vs_14141_56082          | [full]   | 2367  | No  | NA | 0     | 0              | Low-quality     | Genome-fragment | NA              | 3.79  | 0     |
| 510_extracted_51451        |          | 2367  | No  | NA | 0     | 1              | Low-quality     | Genome-fragment | NA              | 0.4   | 0     |
| 512_extracted_14141_6511   |          | 2367  | No  | NA | 1     | 0              | Low-quality     | Genome-fragment | NA              | 2.54  | 0     |
| 57_vs_122602               | [full]   | 1862  | No  | NA | 3     | Not-determined | Genome-fragment | NA              | 0               | 0     |       |
| 57_vs_122627               | [full]   | 1506  | No  | NA | 0     | 0              | Not-determined  | Genome-fragment | NA              | 0     | 0     |
| 57_vs_122653               | [full]   | 1417  | No  | NA | 0     | 0              | Not-determined  | Genome-fragment | NA              | 0     | 0     |
| 57_vs_122761               | [full]   | 3771  | No  | NA | 0     | 0              | Not-determined  | Genome-fragment | NA              | 0     | 0     |
| 512_vs_14141_34234         | [full]   | 2367  | No  | NA | 0     | 0              | Low-quality     | Genome-fragment | NA              | 5.32  | 0     |
| 58_extracted_14141_26575   |          | 2367  | No  | NA | 0     | 0              | Low-quality     | Genome-fragment | NA              | 2.37  | 0     |
| 517_vs_14141_240215        | [full]   | 2368  | No  | NA | 0     | 0              | Low-quality     | Genome-fragment | NA              | 4.25  | 0     |
| 57_vs_123070               | [full]   | 2360  | No  | NA | 0     | 0              | Not-determined  | Genome-fragment | NA              | 0     | 0     |
| 56_vs_14141_30917          | [full]   | 2368  | Yes | NA | 1004  | 1              | 1               | Low-quality     | Genome-fragment | 0.68  | 57.6  |
| 57_vs_123202               | [full]   | 5844  | No  | NA | 0     | 3              | Not-determined  | Genome-fragment | NA              | 0     | 0     |
| 57_vs_123216               | [full]   | 1166  | No  | NA | 0     | 0              | Not-determined  | Genome-fragment | NA              | 0     | 0     |
| 57_vs_123265               | [full]   | 2615  | No  | NA | 0     | 0              | Not-determined  | Genome-fragment | NA              | 0     | 0     |
| 57_vs_123266               | [full]   | 8560  | No  | NA | 0     | 3              | Not-determined  | Genome-fragment | NA              | 0     | 0     |
| 510_vs_116925              | [full]   | 2369  | No  | NA | 0     | 0              | Low-quality     | Genome-fragment | NA              | 3.83  | 0     |
| 57_vs_123348               | [full]   | 4330  | No  | NA | 2     | 1              | Not-determined  | Genome-fragment | NA              | 0     | 0     |
| 515_vs_61638               | [full]   | 2369  | No  | NA | 0     | 3              | Low-quality     | Genome-fragment | NA              | 1.07  | 0     |
| 58_vs_14141_104668         | [full]   | 2369  | No  | NA | 0     | 1              | Low-quality     | Genome-fragment | NA              | 1.15  | 0     |
| 517_extracted_14141_163901 |          | 2370  | No  | NA | 0     | 1              | Low-quality     | Genome-fragment | NA              | 0.27  | 0     |
| 511_vs_14141_37179         | [full]   | 2370  | No  | NA | 0     | 0              | Low-quality     | Genome-fragment | NA              | 5.51  | 0     |
| 51_vs_14141_109671         | [full]   | 2370  | No  | NA | 4     | 0              | Low-quality     | Genome-fragment | NA              | 6.59  | 0     |
| 57_vs_123761               | [full]   | 2728  | No  | NA | 1     | 0              | Not-determined  | Genome-fragment | NA              | 0     | 0     |
| 57_vs_123802               | [full]   | 2077  | No  | NA | 0     | 0              | Not-determined  | Genome-fragment | NA              | 0     | 0     |
| 57_vs_123807               | [full]   | 2031  | No  | NA | 0     | 2              | Not-determined  | Genome-fragment | NA              | 0     | 0     |
| 57_vs_123940               | [full]   | 4257  | No  | NA | 0     | 2              | Not-determined  | Genome-fragment | NA              | 0     | 0     |
| 57_vs_123960               | [full]   | 3223  | No  | NA | 0     | 0              | Not-determined  | Genome-fragment | NA              | 0     | 0     |
| 516_vs_76599               | [full]   | 2370  | Yes | NA | 1000  | 2              | 1               | Low-quality     | Genome-fragment | 2.07  | 57.81 |
| 57_vs_124016               | [full]   | 1373  | No  | NA | 0     | 2              | Not-determined  | Genome-fragment | NA              | 0     | 0     |
| 57_vs_124230               | [full]   | 1170  | No  | NA | 0     | 2              | Not-determined  | Genome-fragment | NA              | 0     | 0     |
| 53_vs_14141_41413          | [full]   | 2371  | No  | NA | 0     | 0              | Low-quality     | Genome-fragment | NA              | 4.38  | 0     |
| 57_vs_124460               | [full]   | 3384  | No  | NA | 0     | 1              | Not-determined  | Genome-fragment | NA              | 0     | 0     |
| 57_vs_124461               | [full]   | 3179  | No  | NA | 0     | 1              | Not-determined  | Genome-fragment | NA              | 0     | 0     |
| 57_vs_124501               | [full]   | 1817  | No  | NA | 0     | 0              | Not-determined  | Genome-fragment | NA              | 0     | 0     |
| 57_vs_124631               | [full]   | 1632  | No  | NA | 0     | 1              | Not-determined  | Genome-fragment | NA              | 0     | 0     |
| 57_vs_124650               | [full]   | 1660  | No  | NA | 0     | 1              | Not-determined  | Genome-fragment | NA              | 0     | 0     |
| 57_vs_124687               | [full]   | 4588  | No  | NA | 0     | 1              | Not-determined  | Genome-fragment | NA              | 0     | 0     |
| 57_vs_124737               | [full]   | 1185  | No  | NA | 0     | 0              | Not-determined  | Genome-fragment | NA              | 0     | 0     |
| 55_vs_14141_12436          | [full]   | 2371  | Yes | NA | 2125  | 1              | 1               | Low-quality     | Genome-fragment | 1.37  | 10.38 |
| 57_vs_124822               | [full]   | 1714  | No  | NA | 0     | 0              | Not-determined  | Genome-fragment | NA              | 0     | 0     |
| 57_vs_124936               | [full]   | 2474  | No  | NA | 0     | 0              | Not-determined  | Genome-fragment | NA              | 0     | 0     |
| 517_vs_14141_39780         | [full]   | 2372  | No  | NA | 1     | 0              | Low-quality     | Genome-fragment | NA              | 3.5   | 0     |
| 57_vs_124987               | [full]   | 2158  | No  | NA | 0     | 3              | Not-determined  | Genome-fragment | NA              | 0     | 0     |
| 59_vs_14141_33736          | [full]   | 2372  | Yes | NA | 1290  | 1              | 1               | Low-quality     | Genome-fragment | 1.6   | 45.62 |
| 51_vs_14141_18049          | [full]   | 2372  | No  | NA | 5     | 0              | Low-quality     | Genome-fragment | NA              | 5.96  | 0     |
| 513_vs_116541              | [full]   | 2372  | No  | NA | 1     | 1              | Low-quality     | Genome-fragment | NA              | 2.22  | 0     |
| 51_vs_14141_122638         | [full]   | 2372  | No  | NA | 4     | 0              | Low-quality     | Genome-fragment | NA              | 5.42  | 0     |
| 57_vs_125101               | [full]   | 17593 | No  | NA | 0     | 12             | Not-determined  | Genome-fragment | NA              | 0     | 0     |
| 58_extracted_14141_135532  |          | 2372  | No  | NA | 3     | 1              | Low-quality     | Genome-fragment | NA              | 5.52  | 0     |
| 59_extracted_14141_3740    |          | 2373  | No  | NA | 0     | 0              | Low-quality     | Genome-fragment | NA              | 5.77  | 0     |
| 57_vs_125296               | [full]   | 1396  | No  | NA | 0     | 0              | Not-determined  | Genome-fragment | NA              | 0     | 0     |
| 57_vs_125478               | [full]   | 2802  | No  | NA | 0     | 0              | Not-determined  | Genome-fragment | NA              | 0     | 0     |
| 59_vs_14141_5657           | [full]   | 2373  | No  | NA | 0     | 0              | Low-quality     | Genome-fragment | NA              | 5.46  | 0     |
| 513_vs_97545               | [full]   | 2373  | No  | NA | 1     | 0              | Low-quality     | Genome-fragment | NA              | 4.09  | 0     |
| 57_vs_125546               | [full]   | 7342  | No  | NA | 0     | 4              | Not-determined  | Genome-fragment | NA              | 5.18  | 0     |
| 51_vs_14141_15082          | [full]   | 2373  | No  | NA | 0     | 0              | Low-quality     | Genome-fragment | NA              | 1.05  | 0     |
| 53_vs_14141_99584          | [full]   | 2373  | No  | NA | 0     | 1              | Low-quality     | Genome-fragment | NA              | 0     | 0     |
| 57_vs_125653               | [full]   | 1430  | No  | NA | 0     | 1              | Not-determined  | Genome-fragment | NA              | 0     | 0     |
| 53_extracted_14141_27681   |          | 2374  | No  | NA | 0     | 0              | Low-quality     | Genome-fragment | NA              | 3.67  | 0     |
| 53_extracted_14141_26515   |          | 2374  | No  | NA | 0     | 1              | Low-quality     | Genome-fragment | NA              | 1.64  | 0     |
| 57_vs_125808               | [full]   | 1374  | No  | NA | 0     | 0              | Not-determined  | Genome-fragment | NA              | 0     | 0     |
| 58_vs_14141_16009          | [full]   | 2374  | No  | NA | 0     | 1              | Low-quality     | Genome-fragment | NA              | 1.53  | 0     |
| 57_extracted_9606          |          | 2374  | No  | NA | 0     | 2              | Low-quality     | Genome-fragment | NA              | 1.02  | 0     |
| 58_vs_14141_130693         | [full]   | 2374  | No  | NA | 1     | 0              | Low-quality     | Genome-fragment | NA              | 3.52  | 0     |
| 58_vs_14141_160512         | [full]   | 2374  | No  | NA | 1     | 0              | Low-quality     | Genome-fragment | NA              | 7.46  | 0     |
| 57_vs_126075               | [full]   | 6859  | No  | NA | 0     | 4              | Not-determined  | Genome-fragment | NA              | 2.92  | 0     |
| 57_vs_126138               | [full]   | 1103  | No  | NA | 0     | 1              | Not-determined  | Genome-fragment | NA              | 0     | 0     |
| 511_extracted_14141_12658  |          | 2375  | No  | NA | 2     | 0              | Low-quality     | Genome-fragment | NA              | 5.4   | 0     |
| 513_vs_105479              | [full]   | 2375  | No  | NA | 0     | 0              | Low-quality     | Genome-fragment | NA              | 5.75  | 0     |
| 516_vs_12606               | [full]   | 2375  | Yes | NA |       |                |                 |                 |                 |       |       |



|                           |       |    |    |     |                |                 |                 |       |   |
|---------------------------|-------|----|----|-----|----------------|-----------------|-----------------|-------|---|
| 57_vs_149011[full]        | 2380  | No | NA | 0   | 0              | Low-quality     | Genome-fragment | 1.07  | 0 |
| 57_vs_130678[full]        | 1586  | No | NA | 0   | 1              | Not-determined  | Genome-fragment | NA    | 0 |
| 57_vs_130716[full]        | 2091  | No | NA | 0   | 3              | Not-determined  | Genome-fragment | NA    | 0 |
| 57_vs_130773[full]        | 5029  | No | NA | 0   | 5              | Not-determined  | Genome-fragment | NA    | 0 |
| 57_vs_130784[full]        | 2183  | No | NA | 0   | 1              | Not-determined  | Genome-fragment | NA    | 0 |
| 57_vs_130802[full]        | 1426  | No | NA | 0   | 0              | Not-determined  | Genome-fragment | NA    | 0 |
| 57_vs_130810[full]        | 9150  | No | NA | 0   | 4              | Not-determined  | Genome-fragment | NA    | 0 |
| 58_vs_k141_11220[full]    | 2380  | No | NA | 0   | 0              | Low-quality     | Genome-fragment | 2.28  | 0 |
| 57_vs_130901[full]        | 2840  | No | NA | 0   | 3              | Not-determined  | Genome-fragment | NA    | 0 |
| 58_vs_k141_181424[full]   | 2380  | No | NA | 0   | 0              | Low-quality     | Genome-fragment | 4.48  | 0 |
| 59_vs_k141_74415[full]    | 2381  | No | NA | 0   | 2              | Low-quality     | Genome-fragment | 2.81  | 0 |
| 57_vs_131040[full]        | 6629  | No | NA | 0   | 3              | Not-determined  | Genome-fragment | NA    | 0 |
| 57_vs_131053[full]        | 2958  | No | NA | 0   | 0              | Not-determined  | Genome-fragment | NA    | 0 |
| 57_vs_131217[full]        | 3179  | No | NA | 0   | 3              | Not-determined  | Genome-fragment | NA    | 0 |
| 511_vs_k141_5503[full]    | 2381  | No | NA | 0   | 0              | Low-quality     | Genome-fragment | 2.67  | 0 |
| 512_extracted_k141_62127  | 2381  | No | NA | 1   | 0              | Low-quality     | Genome-fragment | 1.65  | 0 |
| 52_vs_k141_4791[full]     | 2381  | No | NA | 1   | 0              | Low-quality     | Genome-fragment | 5.54  | 0 |
| 57_vs_131416[full]        | 1884  | No | NA | 0   | 0              | Not-determined  | Genome-fragment | NA    | 0 |
| 57_vs_131443[full]        | 1875  | No | NA | 0   | 2              | Not-determined  | Genome-fragment | NA    | 0 |
| 57_vs_131489[full]        | 3864  | No | NA | 0   | 3              | Not-determined  | Genome-fragment | NA    | 0 |
| 57_vs_131553[full]        | 5717  | No | NA | 0   | 3              | Not-determined  | Genome-fragment | NA    | 0 |
| 57_vs_131561[full]        | 1548  | No | NA | 0   | 3              | Not-determined  | Genome-fragment | NA    | 0 |
| 57_vs_131573[full]        | 6160  | No | NA | 0   | 3              | Not-determined  | Genome-fragment | NA    | 0 |
| 57_vs_131698[full]        | 3164  | No | NA | 0   | 2              | Not-determined  | Genome-fragment | NA    | 0 |
| 511_vs_k141_88150[full]   | 2382  | No | NA | 2   | 0              | Low-quality     | Genome-fragment | 6.6   | 0 |
| 514_extracted_k141_13491  | 2382  | No | NA | 1   | 0              | Low-quality     | Genome-fragment | 8.79  | 0 |
| 57_vs_131859[full]        | 1190  | No | NA | 0   | 2              | Not-determined  | Genome-fragment | NA    | 0 |
| 57_vs_131910[full]        | 1082  | No | NA | 0   | 0              | Not-determined  | Genome-fragment | NA    | 0 |
| 51_vs_k141_61210[full]    | 2382  | No | NA | 2   | 0              | Low-quality     | Genome-fragment | 1.63  | 0 |
| 516_vs_138537[full]       | 2382  | No | NA | 1   | 0              | Low-quality     | Genome-fragment | 2.35  | 0 |
| 57_vs_132026[full]        | 1220  | No | NA | 0   | 0              | Not-determined  | Genome-fragment | NA    | 0 |
| 58_extracted_k141_137679  | 2382  | No | NA | 0   | 2              | Low-quality     | Genome-fragment | 4.2   | 0 |
| 513_extracted_62471       | 2383  | No | NA | 0   | 0              | Low-quality     | Genome-fragment | 1.09  | 0 |
| 57_vs_132463[full]        | 4478  | No | NA | 0   | 3              | Not-determined  | Genome-fragment | NA    | 0 |
| 514_vs_k141_89014[full]   | 2383  | No | NA | 2   | 0              | Low-quality     | Genome-fragment | 5.81  | 0 |
| 516_vs_110099[full]       | 2383  | No | NA | 1   | 0              | Low-quality     | Genome-fragment | 5.51  | 0 |
| 510_vs_131670[full]       | 2383  | No | NA | 0   | 0              | Low-quality     | Genome-fragment | 5.6   | 0 |
| 57_vs_132680[full]        | 2012  | No | NA | 0   | 0              | Not-determined  | Genome-fragment | NA    | 0 |
| 517_vs_k141_165302[full]  | 2384  | No | NA | 0   | 0              | Low-quality     | Genome-fragment | 1.22  | 0 |
| 513_extracted_126990      | 2384  | No | NA | 0   | 0              | Low-quality     | Genome-fragment | 3.88  | 0 |
| 55_vs_k141_60141[full]    | 2384  | No | NA | 0   | 2              | Low-quality     | Genome-fragment | 1.38  | 0 |
| 57_vs_41849[full]         | 2384  | No | NA | 0   | 0              | Low-quality     | Genome-fragment | 6.24  | 0 |
| 57_vs_109191[full]        | 2384  | No | NA | 0   | 0              | Low-quality     | Genome-fragment | 1.63  | 0 |
| 512_vs_k141_78012[full]   | 2384  | No | NA | 0   | 1              | Low-quality     | Genome-fragment | 2.07  | 0 |
| 57_vs_133216[full]        | 1444  | No | NA | 0   | 2              | Not-determined  | Genome-fragment | NA    | 0 |
| 58_vs_k141_13979[full]    | 2384  | No | NA | 1   | 0              | Low-quality     | Genome-fragment | 1.51  | 0 |
| 517_vs_k141_18812[full]   | 2385  | No | NA | 1   | 0              | Low-quality     | Genome-fragment | 1.37  | 0 |
| 511_extracted_k141_55533  | 2385  | No | NA | 0   | 0              | Low-quality     | Genome-fragment | 4.83  | 0 |
| 53_vs_k141_12474[full]    | 2385  | No | NA | 0   | 2              | Low-quality     | Genome-fragment | 1.15  | 0 |
| 57_vs_133838[full]        | 2217  | No | NA | 0   | 1              | Not-determined  | Genome-fragment | NA    | 0 |
| 57_vs_133935[full]        | 12138 | No | NA | 0   | 5              | Not-determined  | Genome-fragment | NA    | 0 |
| 57_vs_132943[full]        | 7387  | No | NA | 2   | Not-determined | Genome-fragment | NA              | 0     |   |
| 57_vs_67334[full]         | 2385  | No | NA | 0   | 0              | Low-quality     | Genome-fragment | 6.85  | 0 |
| 52_vs_k141_8593[full]     | 2385  | No | NA | 2   | 0              | Low-quality     | Genome-fragment | 3.96  | 0 |
| 58_extracted_k141_134535  | 2386  | No | NA | 1   | 0              | Low-quality     | Genome-fragment | 5.88  | 0 |
| 516_vs_17500[full]        | 2387  | No | NA | 0   | 0              | Low-quality     | Genome-fragment | 3.41  | 0 |
| 57_vs_134070[full]        | 4725  | No | NA | 0   | 5              | Not-determined  | Genome-fragment | NA    | 0 |
| 57_vs_134144[full]        | 2289  | No | NA | 0   | 1              | Not-determined  | Genome-fragment | NA    | 0 |
| 58_extracted_k141_179018  | 2387  | No | NA | 0   | 0              | Low-quality     | Genome-fragment | 2.39  | 0 |
| 57_vs_134299[full]        | 8172  | No | NA | 0   | 3              | Not-determined  | Genome-fragment | NA    | 0 |
| 58_vs_k141_52321[full]    | 2387  | No | NA | 0   | 0              | Low-quality     | Genome-fragment | 6.18  | 0 |
| 511_extracted_k141_103567 | 2388  | No | NA | 0   | 0              | Low-quality     | Genome-fragment | 4.53  | 0 |
| 514_extracted_k141_25651  | 2388  | No | NA | 1   | 0              | Low-quality     | Genome-fragment | 3.09  | 0 |
| 57_vs_134450[full]        | 1140  | No | NA | 0   | 0              | Not-determined  | Genome-fragment | NA    | 0 |
| 57_vs_134483[full]        | 1467  | No | NA | 1   | 2              | Not-determined  | Genome-fragment | NA    | 0 |
| 514_vs_k141_17266[full]   | 2388  | No | NA | 4   | 0              | Low-quality     | Genome-fragment | 6.37  | 0 |
| 57_vs_134583[full]        | 48947 | No | NA | 21  | 0              | High-quality    | Genome-fragment | 97.57 | 0 |
| 57_vs_134636[full]        | 1234  | No | NA | 0   | 2              | Not-determined  | Genome-fragment | NA    | 0 |
| 53_vs_k141_105089[full]   | 2388  | No | NA | 0   | 1              | Low-quality     | Genome-fragment | 0.69  | 0 |
| 512_vs_k141_6038[full]    | 2388  | No | NA | 0   | 2              | Low-quality     | Genome-fragment | 7.63  | 0 |
| 57_vs_134722[full]        | 1800  | No | NA | 0   | 1              | Not-determined  | Genome-fragment | NA    | 0 |
| 57_vs_134771[full]        | 1812  | No | NA | 0   | 0              | Not-determined  | Genome-fragment | NA    | 0 |
| 58_vs_k141_169708[full]   | 2388  | No | NA | 0   | 0              | Low-quality     | Genome-fragment | 5.2   | 0 |
| 513_vs_59388[full]        | 2389  | No | NA | 1   | 0              | Low-quality     | Genome-fragment | 2.94  | 0 |
| 57_extracted_110016       | 2389  | No | NA | 0   | 0              | Low-quality     | Genome-fragment | 1.51  | 0 |
| 512_extracted_k141_162055 | 2389  | No | NA | 0   | 0              | Low-quality     | Genome-fragment | 1.12  | 0 |
| 514_vs_k141_76294[full]   | 2390  | No | NA | 0   | 0              | Low-quality     | Genome-fragment | 6.33  | 0 |
| 514_vs_k141_11662[full]   | 2390  | No | NA | 1   | 0              | Low-quality     | Genome-fragment | 4.13  | 0 |
| 516_vs_114131[full]       | 2390  | No | NA | 0   | 0              | Low-quality     | Genome-fragment | NA    | 0 |
| 57_vs_135416[full]        | 2140  | No | NA | 0   | 0              | Not-determined  | Genome-fragment | NA    | 0 |
| 510_vs_154478[full]       | 2390  | No | NA | 1   | 0              | Low-quality     | Genome-fragment | 7.51  | 0 |
| 57_vs_135924[full]        | 2039  | No | NA | 1   | 1              | Not-determined  | Genome-fragment | NA    | 0 |
| 57_vs_136090[full]        | 2004  | No | NA | 0   | 2              | Not-determined  | Genome-fragment | NA    | 0 |
| 57_vs_136139[full]        | 2515  | No | NA | 0   | 0              | Not-determined  | Genome-fragment | NA    | 0 |
| 57_vs_136181[full]        | 2160  | No | NA | 0   | 0              | Not-determined  | Genome-fragment | NA    | 0 |
| 57_vs_136207[full]        | 4963  | No | NA | 0   | 1              | Not-determined  | Genome-fragment | NA    | 0 |
| 57_vs_57625[full]         | 2391  | No | NA | 1   | 0              | Low-quality     | Genome-fragment | 2.67  | 0 |
| 57_vs_136258[full]        | 1614  | No | NA | 0   | 0              | Not-determined  | Genome-fragment | NA    | 0 |
| 512_vs_k141_111721[full]  | 2391  | No | NA | 0   | 0              | Low-quality     | Genome-fragment | 4.74  | 0 |
| 57_vs_136295[full]        | 3247  | No | NA | 0   | 2              | Not-determined  | Genome-fragment | NA    | 0 |
| 57_vs_136311[full]        | 3926  | No | NA | 0   | 2              | Not-determined  | Genome-fragment | NA    | 0 |
| 57_vs_136316[full]        | 1685  | No | NA | 1   | 1              | Not-determined  | Genome-fragment | NA    | 0 |
| 57_vs_136358[full]        | 1006  | No | NA | 0   | 0              | Not-determined  | Genome-fragment | NA    | 0 |
| 515_extracted_71816       | 2391  | No | NA | 0   | 6              | Low-quality     | Genome-fragment | 0.99  | 0 |
| 56_vs_k141_36164[full]    | 2391  | No | NA | 1   | 0              | Low-quality     | Genome-fragment | 4.51  | 0 |
| 58_vs_k141_134178[full]   | 2391  | No | NA | 0   | 0              | Low-quality     | Genome-fragment | 2.66  | 0 |
| 57_vs_136447[full]        | 4476  | No | NA | 0   | 4              | Not-determined  | Genome-fragment | NA    | 0 |
| 58_vs_k141_164524[full]   | 2391  | No | NA | 1   | 0              | Low-quality     | Genome-fragment | 6.9   | 0 |
| 57_vs_136540[full]        | 3616  | No | NA | 2   | 2              | Not-determined  | Genome-fragment | NA    | 0 |
| 59_extracted_k141_43946   | 2392  | No | NA | 1   | 0              | Low-quality     | Genome-fragment | 5.84  | 0 |
| 59_vs_k141_79328[full]    | 2392  | No | NA | 0   | 0              | Low-quality     | Genome-fragment | 1.39  | 0 |
| 511_extracted_k141_88582  | 2392  | No | NA | 0   | 0              | Not-determined  | Genome-fragment | 5.26  | 0 |
| 53_vs_k141_59594[full]    | 2392  | No | NA | 0   | 1              | Low-quality     | Genome-fragment | 3.9   | 0 |
| 57_vs_136816[full]        | 2018  | No | NA | 0   | 3              | Not-determined  | Genome-fragment | NA    | 0 |
| 57_vs_136945[full]        | 1671  | No | NA | 0   | 1              | Not-determined  | Genome-fragment | NA    | 0 |
| 57_vs_136965[full]        | 2616  | No | NA | 0   | 0              | Not-determined  | Genome-fragment | NA    | 0 |
| 57_vs_136979[full]        | 6584  | No | NA | 0   | 3              | Not-determined  | Genome-fragment | NA    | 0 |
| 55_vs_k141_1358[full]     | 2392  | No | NA | 2   | 0              | Low-quality     | Genome-fragment | 6.97  | 0 |
| 57_vs_137062[full]        | 5051  | No | NA | 1   | 5              | Not-determined  | Genome-fragment | NA    | 0 |
| 57_vs_65011[full]         | 2392  | No | NA | 2   | 0              | Low-quality     | Genome-fragment | 5.57  | 0 |
| 57_vs_137152[full]        | 6008  | No | NA | 0   | 1              | Not-determined  | Genome-fragment | NA    | 0 |
| 57_vs_137197[full]        | 1659  | No | NA | 0   | 0              | Not-determined  | Genome-fragment | NA    | 0 |
| 57_vs_137240[full]        | 2747  | No | NA | 0   | 2              | Not-determined  | Genome-fragment | NA    | 0 |
| 516_extracted_168906      | 2392  | No | NA | 0   | 1              | Low-quality     | Genome-fragment | 5.93  | 0 |
| 57_vs_137282[full]        | 1025  | No | NA | 1   | 1              | Not-determined  | Genome-fragment | NA    | 0 |
| 57_vs_137283[full]        | 1171  | No | NA | 0   | 0              | Not-determined  | Genome-fragment | NA    | 0 |
| 57_vs_137338[full]        | 4444  | No | NA | 0   | 1              | Not-determined  | Genome-fragment | NA    | 0 |
| 515_vs_59228[full]        | 2392  | No | NA | 0   | 2              | Low-quality     | Genome-fragment | 1.42  | 0 |
| 57_vs_k141_100979[full]   | 2393  | No | NA | 0   | 0              | Low-quality     | Genome-fragment | 5.94  | 0 |
| 57_vs_137439[full]        | 2255  | No | NA | 0   | 1              | Not-determined  | Genome-fragment | NA    | 0 |
| 57_vs_137466[full]        | 2564  | No | NA | 0   | 1              | Not-determined  | Genome-fragment | NA    | 0 |
| 57_vs_137484[full]        | 2711  | No | NA | 0   | 0              | Not-determined  | Genome-fragment | NA    | 0 |
| 57_vs_137486[full]        | 1993  | No | NA | 0   | 0              | Not-determined  | Genome-fragment | NA    | 0 |
| 57_vs_137553[full]        | 1609  | No | NA | 0   | 1              | Not-determined  | Genome-fragment | NA    | 0 |
| 57_vs_137574[full]        | 2677  | No | NA | 0   | 1              | Not-determined  | Genome-fragment | NA    | 0 |
| 57_vs_137612[full]        | 5581  | No | NA | 0   | 4              | Not-determined  | Genome-fragment | NA    | 0 |
| 57_vs_137613[full]        | 1982  | No | NA | 0   | 2              | Not-determined  | Genome-fragment | NA    | 0 |
| 57_vs_137639[full]        | 1516  | No | NA | 0   | 1              | Not-determined  | Genome-fragment | NA    | 0 |
| 57_vs_137739[full]        | 1246  | No | NA | 0   | 1              | Not-determined  | Genome-fragment | NA    | 0 |
| 57_vs_137793[full]        | 5875  | No | NA | 0   | 0              | Not-determined  | Genome-fragment | NA    | 0 |
| 57_vs_137863[full]        | 9946  | No | NA | 0   | 3              | Not-determined  | Genome-fragment | NA    | 0 |
| 57_vs_137866[full]        | 4523  | No | NA | 0   | 1              | Not-determined  | Genome-fragment | NA    | 0 |
| 57_vs_137913[full]        | 2718  | No | NA | 0   | 0              | Not-determined  | Genome-fragment | NA    | 0 |
| 57_vs_137993[full]        | 2930  | No | NA | 0   | 0              | Not-determined  | Genome-fragment | NA    | 0 |
| 53_vs_k141_65915[full]    | 2393  | No | NA | 1   | 0              | Low-quality     | Genome-fragment | 3.62  | 0 |
| 57_vs_12150[0_partial]    | 22205 | No | NA | 0   | 11             | Not-determined  | Genome-fragment | NA    | 0 |
| 57_vs_15170[0_partial]    | 12925 | No | NA | 0   | 4              | Not-determined  | Genome-fragment | NA    | 0 |
| 57_vs_81867[full]         | 2393  | No | NA | 1   | 0              | Low-quality     | Genome-fragment | 1.47  | 0 |
| 57_vs_47488[0_partial]    | 12026 | No | NA | 0   | 8              | Not-determined  | Genome-fragment | NA    | 0 |
| 57_vs_47978[0_partial]    | 16561 | No | NA | 0   | 3              | Not-determined  | Genome-fragment | NA    | 0 |
| 57_vs_72737[0_partial]    | 3496  | No | NA | 1   | 14             | High-quality    | Genome-fragment | 100   | 0 |
| 516_vs_80541[full]        | 2393  | No | NA | 3   | 0              | Low-quality     | Genome-fragment | 5.75  | 0 |
| 57_vs_118374[0_partial]   | 13751 | No | NA | 0   | 2              | Not-determined  | Genome-fragment | NA    | 0 |
| 56_vs_k141_14261[full]    | 2393  | No | NA | 0   | 2              | Low-quality     | Genome-fragment | 5.35  | 0 |
| 59_vs_k141_88443[full]    | 2394  | No | NA | 0   | 0              | Low-quality     | Genome-fragment | 5.61  | 0 |
| 57_vs_13691[112gene]      | 1156  | No | NA | 0</ |                |                 |                 |       |   |



|                           |          |      |     |      |   |   |                |                 |       |       |
|---------------------------|----------|------|-----|------|---|---|----------------|-----------------|-------|-------|
| 59_vs_k141_38455          | [full]   | 2398 | No  | NA   | 0 | 2 | Low-quality    | Genome-fragment | 4.37  | 0     |
| 51_vs_k141_39312          | [full]   | 2398 | No  | NA   | 0 | 1 | Low-quality    | Genome-fragment | 4.48  | 0     |
| 51_vs_k141_39158          | [full]   | 2398 | No  | NA   | 0 | 3 | Low-quality    | Genome-fragment | 0.69  | 0     |
| 55_vs_k141_125151         | [full]   | 2398 | No  | NA   | 6 | 0 | Low-quality    | Genome-fragment | 7.02  | 0     |
| 516_extracted_102593      |          | 2398 | No  | NA   | 3 | 0 | Low-quality    | Genome-fragment | 4.75  | 0     |
| 516_vs_123804             | [full]   | 2398 | No  | NA   | 0 | 3 | Low-quality    | Genome-fragment | 3.23  | 0     |
| 57_vs_56270               | [full]   | 2399 | No  | NA   | 0 | 1 | Low-quality    | Genome-fragment | 3.18  | 0     |
| 512_vs_k141_172224        | [full]   | 2399 | No  | NA   | 1 | 0 | Low-quality    | Genome-fragment | 1.47  | 0     |
| 513_vs_5788               | [full]   | 2400 | Yes | 1474 | 1 | 1 | Low-quality    | Genome-fragment | 3.06  | 38.58 |
| 514_vs_k141_69536         | [full]   | 2400 | No  | NA   | 0 | 0 | Low-quality    | Genome-fragment | 4.8   | 0     |
| 514_vs_k141_14169         | [full]   | 2400 | No  | NA   | 2 | 0 | Low-quality    | Genome-fragment | 5.54  | 0     |
| 57_vs_115787              | [full]   | 2400 | No  | NA   | 0 | 0 | Low-quality    | Genome-fragment | 5.99  | 0     |
| 516_extracted_825         |          | 2400 | No  | NA   | 1 | 0 | Low-quality    | Genome-fragment | 1.37  | 0     |
| 516_vs_52187              | [full]   | 2400 | No  | NA   | 0 | 0 | Low-quality    | Genome-fragment | 3.51  | 0     |
| 512_vs_k141_130229        | [full]   | 2400 | No  | NA   | 1 | 0 | Low-quality    | Genome-fragment | 5.95  | 0     |
| 58_extracted_k141_17538   |          | 2400 | No  | NA   | 0 | 0 | Low-quality    | Genome-fragment | 7.52  | 0     |
| 58_vs_k141_154512         | [full]   | 2400 | No  | NA   | 3 | 0 | Low-quality    | Genome-fragment | 2.27  | 0     |
| 57_vs_46936               | [H2gene] | 1397 | No  | NA   | 0 | 1 | Not-determined | Genome-fragment | NA    | 2.31  |
| 511_vs_k141_15876         | [full]   | 2401 | No  | NA   | 0 | 0 | Low-quality    | Genome-fragment | 1.91  | 0     |
| 516_vs_112756             | [full]   | 2401 | No  | NA   | 1 | 0 | Low-quality    | Genome-fragment | 5.24  | 0     |
| 510_vs_86716              | [full]   | 2401 | No  | NA   | 1 | 0 | Low-quality    | Genome-fragment | NA    | 0     |
| 57_vs_46662               | [H2gene] | 1671 | No  | NA   | 0 | 0 | Not-determined | Genome-fragment | NA    | 4.22  |
| 517_vs_k141_37417         | [H2gene] | 2402 | No  | NA   | 1 | 0 | Low-quality    | Genome-fragment | 4.22  | 0     |
| 55_vs_k141_107694         | [full]   | 2402 | Yes | 2015 | 1 | 1 | Low-quality    | Genome-fragment | 3.4   | 16.11 |
| 510_vs_12445              | [full]   | 2402 | No  | NA   | 0 | 0 | Low-quality    | Genome-fragment | 4.41  | 0     |
| 510_vs_104554             | [full]   | 2402 | No  | NA   | 1 | 0 | Low-quality    | Genome-fragment | 0.98  | 0     |
| 58_vs_k141_206587         | [full]   | 2402 | No  | NA   | 0 | 1 | Low-quality    | Genome-fragment | 1.08  | 0     |
| 513_vs_14588              | [full]   | 2403 | No  | NA   | 0 | 0 | Low-quality    | Genome-fragment | 4.26  | 0     |
| 51_extracted_k141_113822  |          | 2403 | No  | NA   | 0 | 0 | Low-quality    | Genome-fragment | 5.26  | 0     |
| 58_extracted_k141_157523  |          | 2403 | No  | NA   | 0 | 1 | Low-quality    | Genome-fragment | 5.17  | 0     |
| 58_vs_k141_38410          | [full]   | 2403 | No  | NA   | 1 | 0 | Low-quality    | Genome-fragment | 5.95  | 0     |
| 511_vs_k141_39191         | [full]   | 2404 | No  | NA   | 3 | 0 | Low-quality    | Genome-fragment | 6.52  | 0     |
| 511_vs_k141_2758          | [full]   | 2404 | No  | NA   | 0 | 0 | Low-quality    | Genome-fragment | 2.83  | 0     |
| 57_vs_62988               | [H2gene] | 1186 | No  | NA   | 0 | 1 | Not-determined | Genome-fragment | NA    | 0     |
| 514_extracted_k141_7754   |          | 2404 | No  | NA   | 2 | 0 | Low-quality    | Genome-fragment | 7.9   | 0     |
| 51_extracted_k141_50693   |          | 2404 | No  | NA   | 0 | 0 | Low-quality    | Genome-fragment | 5.3   | 0     |
| 53_vs_k141_83175          | [full]   | 2404 | No  | NA   | 0 | 1 | Low-quality    | Genome-fragment | 1.45  | 0     |
| 58_vs_k141_207030         | [full]   | 2404 | No  | NA   | 0 | 0 | Low-quality    | Genome-fragment | 4.49  | 0     |
| 511_vs_k141_102705        | [full]   | 2405 | No  | NA   | 1 | 0 | Low-quality    | Genome-fragment | 0.77  | 0     |
| 55_extracted_k141_129270  |          | 2405 | No  | NA   | 4 | 0 | Low-quality    | Genome-fragment | 10.98 | 0     |
| 516_extracted_106541      |          | 2405 | No  | NA   | 0 | 0 | Low-quality    | Genome-fragment | 6.22  | 0     |
| 512_vs_k141_180721        | [full]   | 2405 | No  | NA   | 1 | 0 | Low-quality    | Genome-fragment | 1.26  | 0     |
| 56_vs_k141_34813          | [full]   | 2405 | No  | NA   | 0 | 1 | Low-quality    | Genome-fragment | 1.86  | 0     |
| 59_extracted_k141_75201   |          | 2406 | No  | NA   | 0 | 1 | Low-quality    | Genome-fragment | 5.66  | 0     |
| 51_extracted_k141_143539  |          | 2406 | No  | NA   | 0 | 1 | Low-quality    | Genome-fragment | 2.45  | 0     |
| 55_vs_k141_6631           | [full]   | 2407 | No  | NA   | 0 | 0 | Low-quality    | Genome-fragment | 4.47  | 0     |
| 55_vs_k141_45950          | [full]   | 2407 | No  | NA   | 2 | 0 | Low-quality    | Genome-fragment | 5.58  | 0     |
| 510_vs_8041               | [full]   | 2407 | No  | NA   | 0 | 2 | Low-quality    | Genome-fragment | 2.31  | 0     |
| 54_extracted_5458         |          | 2407 | No  | NA   | 0 | 0 | Low-quality    | Genome-fragment | 6.91  | 0     |
| 58_vs_k141_188476         | [full]   | 2407 | No  | NA   | 0 | 0 | Low-quality    | Genome-fragment | 5.85  | 0     |
| 53_extracted_k141_25458   |          | 2408 | No  | NA   | 3 | 0 | Low-quality    | Genome-fragment | 30.98 | 0     |
| 55_vs_k141_80470          | [full]   | 2408 | No  | NA   | 0 | 0 | Low-quality    | Genome-fragment | 2.52  | 0     |
| 513_vs_55805              | [full]   | 2409 | No  | NA   | 1 | 0 | Low-quality    | Genome-fragment | 4.41  | 0     |
| 51_vs_k141_86086          | [full]   | 2409 | No  | NA   | 1 | 0 | Low-quality    | Genome-fragment | 3.65  | 0     |
| 57_vs_77401               | [H2gene] | 1023 | No  | NA   | 0 | 0 | Not-determined | Genome-fragment | NA    | 7.01  |
| 516_vs_118170             | [full]   | 2409 | No  | NA   | 3 | 0 | Low-quality    | Genome-fragment | 4.85  | 0     |
| 510_extracted_60063       |          | 2409 | No  | NA   | 1 | 0 | Low-quality    | Genome-fragment | NA    | 0.53  |
| 57_vs_77921               | [H2gene] | 1016 | No  | NA   | 0 | 0 | Not-determined | Genome-fragment | NA    | 7.95  |
| 58_extracted_k141_179106  |          | 2409 | No  | NA   | 0 | 2 | Low-quality    | Genome-fragment | 5.25  | 0     |
| 517_extracted_k141_118658 |          | 2410 | No  | NA   | 4 | 0 | Low-quality    | Genome-fragment | 1.42  | 0     |
| 59_extracted_k141_27059   |          | 2410 | No  | NA   | 0 | 0 | Low-quality    | Genome-fragment | 6.44  | 0     |
| 511_vs_k141_100848        | [full]   | 2410 | No  | NA   | 0 | 0 | Low-quality    | Genome-fragment | 3.65  | 0     |
| 511_vs_k141_89317         | [full]   | 2410 | No  | NA   | 0 | 2 | Low-quality    | Genome-fragment | 0.89  | 0     |
| 53_extracted_k141_28143   |          | 2410 | No  | NA   | 1 | 0 | Low-quality    | Genome-fragment | 3.74  | 0     |
| 55_extracted_k141_59172   |          | 2410 | No  | NA   | 0 | 0 | Low-quality    | Genome-fragment | 3.24  | 0     |
| 516_vs_59857              | [full]   | 2411 | No  | NA   | 1 | 0 | Low-quality    | Genome-fragment | 5.89  | 0     |
| 513_vs_121022             | [full]   | 2412 | No  | NA   | 0 | 0 | Low-quality    | Genome-fragment | 1.79  | 0     |
| 53_extracted_k141_33597   |          | 2412 | No  | NA   | 0 | 0 | Low-quality    | Genome-fragment | 5.71  | 0     |
| 55_vs_k141_104937         | [full]   | 2412 | No  | NA   | 1 | 0 | Low-quality    | Genome-fragment | 7.96  | 0     |
| 512_extracted_k141_118399 |          | 2412 | No  | NA   | 1 | 0 | Low-quality    | Genome-fragment | 3.16  | 0     |
| 514_vs_k141_50862         | [full]   | 2413 | No  | NA   | 1 | 0 | Low-quality    | Genome-fragment | 4.37  | 0     |
| 57_extracted_17200        |          | 2413 | No  | NA   | 0 | 1 | Low-quality    | Genome-fragment | 5.17  | 0     |
| 516_vs_32803              | [H2gene] | 2413 | No  | NA   | 1 | 0 | Low-quality    | Genome-fragment | 1.39  | 0     |
| 56_vs_k141_7596           | [full]   | 2413 | No  | NA   | 0 | 1 | Low-quality    | Genome-fragment | 4.1   | 0     |
| 58_vs_k141_12200          | [full]   | 2413 | No  | NA   | 0 | 1 | Low-quality    | Genome-fragment | 9.6   | 0     |
| 59_extracted_k141_34578   |          | 2414 | No  | NA   | 0 | 0 | Low-quality    | Genome-fragment | NA    | 0.98  |
| 51_vs_k141_50029          | [full]   | 2414 | No  | NA   | 1 | 0 | Low-quality    | Genome-fragment | 3.53  | 0     |
| 512_vs_k141_114557        | [full]   | 2414 | No  | NA   | 4 | 0 | Low-quality    | Genome-fragment | 1.83  | 0     |
| 57_vs_93841               | [H2gene] | 1203 | No  | NA   | 1 | 3 | Not-determined | Genome-fragment | NA    | 4.69  |
| 58_extracted_k141_345059  |          | 2414 | No  | NA   | 0 | 3 | Low-quality    | Genome-fragment | 6.19  | 0     |
| 59_vs_k141_21662          | [full]   | 2415 | No  | NA   | 1 | 0 | Low-quality    | Genome-fragment | 3.34  | 0     |
| 55_vs_k141_70714          | [full]   | 2415 | No  | NA   | 2 | 0 | Low-quality    | Genome-fragment | 1.23  | 0     |
| 515_vs_74374              | [full]   | 2415 | No  | NA   | 0 | 3 | Low-quality    | Genome-fragment | 5.07  | 0     |
| 514_vs_k141_66572         | [full]   | 2416 | No  | NA   | 0 | 0 | Low-quality    | Genome-fragment | 0.62  | 0     |
| 51_vs_k141_18428          | [full]   | 2416 | No  | NA   | 0 | 0 | Low-quality    | Genome-fragment | 5.67  | 0     |
| 55_vs_k141_52746          | [full]   | 2416 | No  | NA   | 1 | 0 | Low-quality    | Genome-fragment | 4.15  | 0     |
| 513_vs_56539              | [full]   | 2416 | No  | NA   | 2 | 0 | Low-quality    | Genome-fragment | 1.86  | 0     |
| 51_vs_k141_119481         | [full]   | 2417 | No  | NA   | 0 | 1 | Low-quality    | Genome-fragment | 1.38  | 0     |
| 55_vs_k141_78501          | [full]   | 2417 | No  | NA   | 0 | 0 | Low-quality    | Genome-fragment | 5.8   | 0     |
| 57_vs_22454               | [full]   | 2417 | No  | NA   | 0 | 1 | Low-quality    | Genome-fragment | 1.2   | 0     |
| 510_vs_77309              | [H2gene] | 2417 | No  | NA   | 1 | 0 | Low-quality    | Genome-fragment | 7.25  | 0     |
| 512_vs_k141_89108         | [full]   | 2417 | No  | NA   | 0 | 0 | Low-quality    | Genome-fragment | 6.23  | 0     |
| 58_extracted_k141_113233  |          | 2417 | No  | NA   | 0 | 0 | Low-quality    | Genome-fragment | 3.62  | 0     |
| 514_vs_k141_12708         | [full]   | 2418 | No  | NA   | 0 | 0 | Low-quality    | Genome-fragment | NA    | 5.07  |
| 51_vs_k141_7725           | [full]   | 2418 | No  | NA   | 0 | 2 | Low-quality    | Genome-fragment | 7.73  | 0     |
| 55_extracted_k141_106680  |          | 2418 | No  | NA   | 2 | 0 | Low-quality    | Genome-fragment | 2.35  | 0     |
| 516_vs_149706             | [H2gene] | 2418 | No  | NA   | 0 | 0 | Low-quality    | Genome-fragment | 1.84  | 0     |
| 510_vs_13745              | [full]   | 2418 | No  | NA   | 1 | 0 | Low-quality    | Genome-fragment | 1.25  | 0     |
| 57_vs_113527              | [H2gene] | 1173 | No  | NA   | 0 | 0 | Not-determined | Genome-fragment | NA    | 4.03  |
| 57_vs_112095              | [H2gene] | 1102 | No  | NA   | 0 | 0 | Not-determined | Genome-fragment | NA    | 6.72  |
| 57_vs_112095              | [H2gene] | 2419 | No  | NA   | 2 | 0 | Low-quality    | Genome-fragment | 5.72  | 0     |
| 516_extracted_167887      |          | 2419 | No  | NA   | 0 | 0 | Low-quality    | Genome-fragment | 7.9   | 0     |
| 516_vs_138438             | [full]   | 2419 | No  | NA   | 1 | 0 | Low-quality    | Genome-fragment | 3.96  | 0     |
| 512_extracted_k141_134290 |          | 2419 | No  | NA   | 0 | 0 | Low-quality    | Genome-fragment | NA    | 42.28 |
| 55_extracted_k141_107788  |          | 2420 | No  | NA   | 0 | 2 | Low-quality    | Genome-fragment | 1.08  | 0     |
| 58_vs_k141_188326         | [full]   | 2420 | No  | NA   | 1 | 0 | Low-quality    | Genome-fragment | 3.9   | 0     |
| 517_extracted_k141_15302  |          | 2421 | No  | NA   | 0 | 0 | Low-quality    | Genome-fragment | 5.45  | 0     |
| 517_vs_k141_151316        | [full]   | 2421 | No  | NA   | 0 | 1 | Low-quality    | Genome-fragment | 6.06  | 0     |
| 517_vs_k141_79720         | [full]   | 2421 | No  | NA   | 0 | 0 | Low-quality    | Genome-fragment | 2.98  | 0     |
| 57_vs_30426               | [full]   | 2421 | No  | NA   | 2 | 0 | Low-quality    | Genome-fragment | 7.89  | 0     |
| 57_vs_12521               | [H2gene] | 1498 | No  | NA   | 0 | 0 | Not-determined | Genome-fragment | NA    | 6.19  |
| 56_extracted_k141_51122   |          | 2421 | No  | NA   | 0 | 2 | Low-quality    | Genome-fragment | 4.19  | 0     |
| 514_extracted_k141_24930  |          | 2422 | No  | NA   | 4 | 0 | Low-quality    | Genome-fragment | 1.69  | 0     |
| 51_extracted_k141_33559   |          | 2422 | No  | NA   | 2 | 0 | Low-quality    | Genome-fragment | 4.85  | 0     |
| 57_extracted_15175        |          | 2422 | Yes | 1398 | 1 | 0 | Low-quality    | Genome-fragment | 1.45  | 0     |
| 57_vs_127657              | [H2gene] | 1031 | No  | NA   | 0 | 0 | Not-determined | Genome-fragment | NA    | 1.27  |
| 510_extracted_69030       |          | 2422 | No  | NA   | 0 | 0 | Low-quality    | Genome-fragment | 1.68  | 45.94 |
| 515_vs_61456              | [full]   | 2422 | No  | NA   | 4 | 0 | Low-quality    | Genome-fragment | 7.34  | 0     |
| 58_extracted_k141_159984  |          | 2423 | No  | NA   | 0 | 0 | Low-quality    | Genome-fragment | 3.9   | 0     |
| 511_vs_k141_81426         | [H2gene] | 2424 | No  | NA   | 2 | 0 | Low-quality    | Genome-fragment | NA    | 0     |
| 510_extracted_51357       |          | 2424 | No  | NA   | 1 | 0 | Low-quality    | Genome-fragment | NA    | 0     |
| 514_vs_k141_47282         | [full]   | 2425 | No  | NA   | 0 | 1 | Low-quality    | Genome-fragment | NA    | 0     |
| 514_vs_k141_35775         | [full]   | 2425 | No  | NA   | 0 | 0 | Low-quality    | Genome-fragment | NA    | 0     |
| 53_vs_k141_15680          | [full]   | 2425 | No  | NA   | 0 | 2 | Low-quality    | Genome-fragment | NA    | 0     |
| 57_vs_6762                | [full]   | 2425 | No  | NA   | 0 | 3 | Low-quality    | Genome-fragment | NA    | 0     |
| 57_vs_61286               | [full]   | 2425 | No  | NA   | 2 | 0 | Low-quality    | Genome-fragment | NA    | 0     |
| 512_extracted_k141_381146 |          | 2425 | No  | NA   | 0 | 2 | Low-quality    | Genome-fragment | NA    | 0     |
| 512_vs_k141_57182         | [full]   | 2425 | No  | NA   | 0 | 1 | Low-quality    | Genome-fragment | NA    | 0     |
| 58_extracted_k141_66256   |          | 2425 | Yes | 1311 | 1 | 2 | Low-quality    | Genome-fragment | NA    | 0     |
| 514_vs_k141_78630         | [H2gene] | 2426 | No  | NA   | 0 | 0 | Low-quality    | Genome-fragment | NA    | 0     |
| 53_vs_k141_121994         | [full]   | 2426 | No  | NA   | 1 | 0 | Low-quality    | Genome-fragment | NA    | 0     |
| 55_vs_k141_70380          | [full]   | 2426 | No  | NA   | 0 | 0 | Low-quality    | Genome-fragment | NA    | 0     |
| 511_vs_k141_673           | [full]   | 2427 | No  | NA   | 1 | 0 | Low-quality    | Genome-fragment | NA    | 0     |
| NC1_vs_k141_3157          |          | 1097 | No  | NA   | 0 | 1 | Not-determined | Genome-fragment | NA    | 0.79  |
| 51_vs_k141_79633          | [full]   | 2427 | No  | NA   | 0 | 2 | Low-quality    | Genome-fragment | NA    | 0     |
| NC1_vs_k141_1594          |          | 1970 | No  | NA   | 0 | 1 | Not-determined |                 |       |       |



|                            |       |    |    |    |   |                |                 |       |       |
|----------------------------|-------|----|----|----|---|----------------|-----------------|-------|-------|
| NC1_vf_k141_1325           | 1116  | No | NA | 0  | 0 | Not-determined | Genome-fragment | NA    | 0     |
| NC1_vf_k141_1560           | 1050  | No | NA | 0  | 1 | Not-determined | Genome-fragment | NA    | 0     |
| NC1_vf_k141_2681           | 1186  | No | NA | 0  | 0 | Not-determined | Genome-fragment | NA    | 0     |
| NC1_vf_k141_2247           | 3416  | No | NA | 0  | 0 | Not-determined | Genome-fragment | NA    | 0     |
| NC3_vf_k141_798            | 1175  | No | NA | 0  | 0 | Not-determined | Genome-fragment | NA    | 0     |
| NC3_vf_k141_143            | 1455  | No | NA | 0  | 0 | Not-determined | Genome-fragment | NA    | 0     |
| NC3_vf_k141_546            | 1142  | No | NA | 0  | 0 | Not-determined | Genome-fragment | NA    | 0     |
| NC3_vf_k141_2001           | 3765  | No | NA | 0  | 0 | Not-determined | Genome-fragment | NA    | 0     |
| NC3_vf_k141_149            | 1451  | No | NA | 0  | 2 | Not-determined | Genome-fragment | NA    | 0     |
| NC3_vf_k141_2012           | 1081  | No | NA | 0  | 0 | Not-determined | Genome-fragment | NA    | 0     |
| NC3_vf_k141_566            | 1064  | No | NA | 0  | 0 | Not-determined | Genome-fragment | NA    | 0     |
| NC3_vf_k141_42             | 1022  | No | NA | 0  | 0 | Not-determined | Genome-fragment | NA    | 0     |
| NC3_vf_k141_1212           | 1354  | No | NA | 0  | 0 | Not-determined | Genome-fragment | NA    | 0     |
| NC3_vf_k141_299            | 1148  | No | NA | 0  | 0 | Not-determined | Genome-fragment | NA    | 0     |
| NC3_vf_k141_1904           | 3220  | No | NA | 0  | 0 | Not-determined | Genome-fragment | NA    | 0     |
| NC3_vf_k141_2033           | 1050  | No | NA | 0  | 1 | Not-determined | Genome-fragment | NA    | 0     |
| S14_vs_k141_76788  full    | 2428  | No | NA | 2  | 0 | Low-quality    | Genome-fragment | 5.1   | 0     |
| NC3_vf_k141_308            | 1857  | No | NA | 0  | 0 | Not-determined | Genome-fragment | NA    | 0     |
| NC2_vf_k141_2029           | 2248  | No | NA | 0  | 2 | Not-determined | Genome-fragment | NA    | 0     |
| NC3_vf_k141_187            | 2510  | No | NA | 0  | 0 | Not-determined | Genome-fragment | NA    | 0     |
| NC3_vf_k141_1647           | 2447  | No | NA | 0  | 3 | Not-determined | Genome-fragment | NA    | 0     |
| NC2_vf_k141_1513           | 5056  | No | NA | 0  | 6 | Not-determined | Genome-fragment | NA    | 0     |
| NC3_vf_k141_1916           | 2136  | No | NA | 0  | 0 | Not-determined | Genome-fragment | NA    | 0     |
| NC3_vf_k141_587            | 2113  | No | NA | 0  | 0 | Not-determined | Genome-fragment | NA    | 0     |
| NC3_vf_k141_2046           | 2152  | No | NA | 0  | 3 | Not-determined | Genome-fragment | NA    | 0     |
| NC3_vf_k141_237            | 1382  | No | NA | 0  | 0 | Not-determined | Genome-fragment | NA    | 0     |
| NC3_vf_k141_2047           | 1339  | No | NA | 0  | 0 | Not-determined | Genome-fragment | NA    | 0     |
| NC3_vf_k141_853            | 1123  | No | NA | 0  | 0 | Not-determined | Genome-fragment | NA    | 0     |
| NC3_vf_k141_500            | 1108  | No | NA | 0  | 0 | Not-determined | Genome-fragment | NA    | 0     |
| NC3_vf_k141_1390           | 1270  | No | NA | 0  | 0 | Not-determined | Genome-fragment | NA    | 0     |
| NC3_vf_k141_1243           | 1175  | No | NA | 0  | 0 | Not-determined | Genome-fragment | NA    | 0     |
| NC3_vf_k141_505            | 1089  | No | NA | 0  | 2 | Not-determined | Genome-fragment | NA    | 0     |
| NC3_vf_k141_1821           | 1587  | No | NA | 0  | 0 | Not-determined | Genome-fragment | NA    | 0     |
| NC3_vf_k141_460            | 1334  | No | NA | 0  | 0 | Not-determined | Genome-fragment | NA    | 0     |
| NC3_vf_k141_1951           | 1128  | No | NA | 0  | 0 | Not-determined | Genome-fragment | NA    | 0     |
| NC3_vf_k141_714            | 2843  | No | NA | 0  | 1 | Not-determined | Genome-fragment | NA    | 0     |
| S5_vs_k141_27806  full     | 2428  | No | NA | 0  | 0 | Low-quality    | Genome-fragment | 1.17  | 0     |
| NC3_vf_k141_228            | 1613  | No | NA | 0  | 0 | Not-determined | Genome-fragment | NA    | 0     |
| NC3_vf_k141_735            | 1626  | No | NA | 0  | 1 | Not-determined | Genome-fragment | NA    | 0     |
| NC3_vf_k141_1406           | 1031  | No | NA | 0  | 0 | Not-determined | Genome-fragment | NA    | 0     |
| NC3_vf_k141_1557           | 1029  | No | NA | 0  | 0 | Not-determined | Genome-fragment | NA    | 0     |
| NC3_vf_k141_589            | 1412  | No | NA | 0  | 1 | Not-determined | Genome-fragment | NA    | 0     |
| NC3_vf_k141_473            | 1090  | No | NA | 0  | 0 | Not-determined | Genome-fragment | NA    | 0     |
| NC3_vf_k141_626            | 1138  | No | NA | 0  | 0 | Not-determined | Genome-fragment | NA    | 0     |
| NC3_vf_k141_115            | 2969  | No | NA | 0  | 0 | Not-determined | Genome-fragment | NA    | 0     |
| NC3_vf_k141_738            | 2777  | No | NA | 0  | 2 | Not-determined | Genome-fragment | NA    | 0     |
| NC3_vf_k141_1417           | 1066  | No | NA | 0  | 0 | Not-determined | Genome-fragment | NA    | 0     |
| NC3_vf_k141_2105           | 1058  | No | NA | 0  | 0 | Not-determined | Genome-fragment | NA    | 0     |
| NC3_vf_k141_1190           | 5560  | No | NA | 0  | 5 | Not-determined | Genome-fragment | NA    | 0     |
| NC3_vf_k141_494            | 1815  | No | NA | 0  | 0 | Not-determined | Genome-fragment | NA    | 0     |
| NC3_vf_k141_1193           | 1122  | No | NA | 0  | 0 | Not-determined | Genome-fragment | NA    | 0     |
| NC2_vf_k141_1011           | 1027  | No | NA | 0  | 0 | Not-determined | Genome-fragment | NA    | 0     |
| NC3_vf_k141_1196           | 3020  | No | NA | 0  | 4 | Not-determined | Genome-fragment | NA    | 0     |
| NC3_vf_k141_2109           | 8080  | No | NA | 0  | 3 | Not-determined | Genome-fragment | NA    | 0     |
| NC2_vf_k141_768            | 5804  | No | NA | 0  | 0 | Not-determined | Genome-fragment | NA    | 0     |
| NC3_vf_k141_906            | 1583  | No | NA | 0  | 2 | Not-determined | Genome-fragment | NA    | 0     |
| S8_vs_k141_109406  full    | 2428  | No | NA | 0  | 0 | Low-quality    | Genome-fragment | 5.64  | 0     |
| NC3_vf_k141_24066  full    | 2429  | No | NA | 1  | 0 | Low-quality    | Genome-fragment | 6.24  | 0     |
| NC3_vf_k141_1296           | 1643  | No | NA | 0  | 0 | Not-determined | Genome-fragment | NA    | 0     |
| NC3_vf_k141_1039           | 1655  | No | NA | 0  | 0 | Not-determined | Genome-fragment | NA    | 0     |
| NC3_vf_k141_1054           | 1155  | No | NA | 0  | 0 | Not-determined | Genome-fragment | NA    | 0     |
| S16_extracted_50           | 2143  | No | NA | 0  | 0 | Not-determined | Genome-fragment | NA    | 0     |
| S16_extracted_121          | 1183  | No | NA | 0  | 0 | Not-determined | Genome-fragment | NA    | 0     |
| S7_vs_965  full            | 2429  | No | NA | 0  | 0 | Low-quality    | Genome-fragment | 5.63  | 0     |
| S16_extracted_216          | 2452  | No | NA | 0  | 0 | Not-determined | Genome-fragment | NA    | 0     |
| S7_vs_69240  H2gene        | 2429  | No | NA | 1  | 0 | Low-quality    | Genome-fragment | 4.09  | 0     |
| S16_extracted_416          | 6561  | No | NA | 0  | 0 | Not-determined | Genome-fragment | NA    | 0     |
| S16_extracted_465          | 5263  | No | NA | 0  | 0 | Not-determined | Genome-fragment | NA    | 0     |
| S16_extracted_548          | 1234  | No | NA | 0  | 1 | Not-determined | Genome-fragment | NA    | 0     |
| S16_extracted_560          | 1235  | No | NA | 0  | 0 | Not-determined | Genome-fragment | NA    | 0     |
| S16_extracted_575          | 1067  | No | NA | 0  | 0 | Not-determined | Genome-fragment | NA    | 0     |
| S16_extracted_8667         | 2429  | No | NA | 0  | 1 | Low-quality    | Genome-fragment | 1.31  | 0     |
| S16_extracted_914          | 1441  | No | NA | 0  | 0 | Not-determined | Genome-fragment | NA    | 0     |
| S3_vs_k141_104371  full    | 2430  | No | NA | 0  | 0 | Low-quality    | Genome-fragment | 5.76  | 0     |
| S16_extracted_1037         | 58665 | No | NA | 29 | 2 | High-quality   | Genome-fragment | 4.59  | 0     |
| S10_vs_81025  full         | 2430  | No | NA | 0  | 0 | Low-quality    | Genome-fragment | NA    | 0     |
| S16_extracted_1090         | 1174  | No | NA | 0  | 0 | Not-determined | Genome-fragment | NA    | 0     |
| S16_extracted_1101         | 1013  | No | NA | 0  | 0 | Not-determined | Genome-fragment | NA    | 0     |
| S16_extracted_1289         | 1791  | No | NA | 0  | 1 | Not-determined | Genome-fragment | NA    | 0     |
| S16_extracted_1572         | 1103  | No | NA | 0  | 0 | Not-determined | Genome-fragment | NA    | 0     |
| S16_extracted_1591         | 1495  | No | NA | 0  | 0 | Not-determined | Genome-fragment | NA    | 0     |
| S12_vs_k141_139329  H2gene | 2430  | No | NA | 0  | 0 | Low-quality    | Genome-fragment | 7.08  | 0     |
| S16_extracted_1763         | 1016  | No | NA | 0  | 0 | Not-determined | Genome-fragment | NA    | 0     |
| S16_extracted_1798         | 2199  | No | NA | 0  | 0 | Not-determined | Genome-fragment | NA    | 0     |
| S1_vs_k141_136354  full    | 2431  | No | NA | 0  | 0 | Low-quality    | Genome-fragment | 1.46  | 0     |
| S16_extracted_1850         | 1045  | No | NA | 0  | 0 | Not-determined | Genome-fragment | NA    | 0     |
| S16_extracted_1959         | 1980  | No | NA | 0  | 0 | Not-determined | Genome-fragment | NA    | 0     |
| S16_extracted_2039         | 1382  | No | NA | 0  | 0 | Not-determined | Genome-fragment | NA    | 0     |
| S3_vs_k141_51373  full     | 2431  | No | NA | 0  | 0 | Low-quality    | Genome-fragment | 4.96  | 0     |
| S3_vs_k141_23167  full     | 2431  | No | NA | 2  | 0 | Low-quality    | Genome-fragment | 6.75  | 0     |
| S5_vs_k141_16831  full     | 2431  | No | NA | 1  | 0 | Low-quality    | Genome-fragment | 5.99  | 0     |
| S16_extracted_2463         | 3454  | No | NA | 0  | 1 | Not-determined | Genome-fragment | NA    | 0     |
| S16_extracted_2477         | 2847  | No | NA | 0  | 6 | Not-determined | Genome-fragment | NA    | 0     |
| S16_extracted_2496         | 1002  | No | NA | 0  | 0 | Not-determined | Genome-fragment | NA    | 0     |
| S9_vs_k141_65790  full     | 2432  | No | NA | 0  | 3 | Low-quality    | Genome-fragment | 0.97  | 0     |
| S16_extracted_2750         | 1135  | No | NA | 0  | 0 | Not-determined | Genome-fragment | NA    | 0     |
| S16_extracted_2862         | 1573  | No | NA | 0  | 0 | Not-determined | Genome-fragment | NA    | 0     |
| S16_extracted_2976         | 1537  | No | NA | 0  | 0 | Not-determined | Genome-fragment | NA    | 0     |
| S16_extracted_3085         | 1853  | No | NA | 0  | 1 | Not-determined | Genome-fragment | NA    | 0     |
| S16_extracted_3151         | 5358  | No | NA | 0  | 0 | Not-determined | Genome-fragment | NA    | 0     |
| S16_extracted_3162         | 22704 | No | NA | 0  | 3 | Not-determined | Genome-fragment | NA    | 0     |
| S10_vs_29127  H2gene       | 2432  | No | NA | 0  | 0 | Low-quality    | Genome-fragment | 4.8   | 0     |
| S16_extracted_3336         | 1432  | No | NA | 0  | 0 | Not-determined | Genome-fragment | NA    | 0     |
| S17_vs_k141_128025  full   | 2433  | No | NA | 0  | 2 | Low-quality    | Genome-fragment | 4.29  | 0     |
| S16_extracted_3452         | 1080  | No | NA | 0  | 1 | Not-determined | Genome-fragment | NA    | 0     |
| S1_extracted_k141_142458   | 2433  | No | NA | 1  | 0 | Low-quality    | Genome-fragment | 2.46  | 0     |
| S16_extracted_3543         | 3378  | No | NA | 0  | 0 | Not-determined | Genome-fragment | NA    | 0     |
| S16_extracted_3590         | 1610  | No | NA | 0  | 0 | Not-determined | Genome-fragment | NA    | 0     |
| S16_extracted_3637         | 3159  | No | NA | 0  | 2 | Not-determined | Genome-fragment | NA    | 0     |
| S16_extracted_3639         | 1063  | No | NA | 0  | 0 | Not-determined | Genome-fragment | NA    | 0     |
| S16_extracted_3680         | 2974  | No | NA | 0  | 0 | Not-determined | Genome-fragment | NA    | 0     |
| S16_extracted_3852         | 1562  | No | NA | 0  | 0 | Not-determined | Genome-fragment | NA    | 0     |
| S1_vs_k141_144075  full    | 2433  | No | NA | 3  | 0 | Low-quality    | Genome-fragment | 5     | 0     |
| S16_extracted_3940         | 4781  | No | NA | 0  | 2 | Not-determined | Genome-fragment | NA    | 0     |
| S1_vs_k141_150798  full    | 2433  | No | NA | 1  | 0 | Low-quality    | Genome-fragment | 1.27  | 63.09 |
| S16_extracted_4061         | 4032  | No | NA | 0  | 0 | Not-determined | Genome-fragment | NA    | 0     |
| S3_extracted_k141_43660    | 2433  | No | NA | 1  | 0 | Low-quality    | Genome-fragment | 4.21  | 0     |
| S10_extracted_99672        | 2433  | No | NA | 2  | 0 | Low-quality    | Genome-fragment | 4.61  | 0     |
| S16_extracted_4205         | 4728  | No | NA | 0  | 4 | Not-determined | Genome-fragment | NA    | 0     |
| S16_extracted_4263         | 3334  | No | NA | 0  | 0 | Not-determined | Genome-fragment | NA    | 0     |
| S16_extracted_4305         | 1658  | No | NA | 0  | 0 | Not-determined | Genome-fragment | NA    | 0     |
| S16_extracted_4323         | 5750  | No | NA | 0  | 2 | Not-determined | Genome-fragment | NA    | 0     |
| S16_extracted_4418         | 1203  | No | NA | 0  | 0 | Not-determined | Genome-fragment | NA    | 0     |
| S16_extracted_4421         | 1149  | No | NA | 0  | 0 | Not-determined | Genome-fragment | NA    | 0     |
| S16_extracted_4513         | 3859  | No | NA | 0  | 2 | Not-determined | Genome-fragment | NA    | 0     |
| S16_extracted_4571         | 1351  | No | NA | 0  | 0 | Not-determined | Genome-fragment | NA    | 0     |
| S16_extracted_4643         | 1931  | No | NA | 0  | 1 | Not-determined | Genome-fragment | NA    | 0     |
| S14_extracted_k141_52676   | 2434  | No | NA | 0  | 0 | Low-quality    | Genome-fragment | 8.02  | 0     |
| S14_vs_k141_50360  full    | 2434  | No | NA | 0  | 0 | Low-quality    | Genome-fragment | 1.29  | 0     |
| S3_vs_k141_112824  full    | 2434  | No | NA | 0  | 3 | Low-quality    | Genome-fragment | 3.51  | 0     |
| S16_extracted_4698         | 2645  | No | NA | 0  | 4 | Not-determined | Genome-fragment | NA    | 0     |
| S5_vs_k141_114345  full    | 2434  | No | NA | 0  | 0 | Low-quality    | Genome-fragment | 1.25  | 0     |
| S16_extracted_4731         | 25679 | No | NA | 0  | 8 | Not-determined | Genome-fragment | NA    | 0     |
| S16_extracted_4762         | 1093  | No | NA | 0  | 2 | Not-determined | Genome-fragment | NA    | 0     |
| S16_extracted_4763         | 2864  | No | NA | 0  | 3 | Not-determined | Genome-fragment | NA    | 0     |
| S16_extracted_4773         | 1235  | No | NA | 0  | 0 | Not-determined | Genome-fragment | NA    | 0     |
| S16_extracted_4779         | 1294  | No | NA | 0  | 0 | Not-determined | Genome-fragment | NA    | 0     |
| S16_extracted_4819         | 1350  | No | NA | 0  | 0 | Not-determined | Genome-fragment | NA    | 0     |
| S16_extracted_4999         | 1224  | No | NA | 0  | 2 | Not-determined | Genome-fragment | NA    | 0     |
| S16_vs_21384  full         | 2434  | No | NA | 0  | 2 | Low-quality    | Genome-fragment | 2.9   | 0     |
| S16_extracted_5099         | 1019  | No | NA | 0  | 0 | Not-determined | Genome-fragment | NA    | 0     |
| S16_extracted_5121         | 1458  | No | NA | 0  | 2 | Not-determined | Genome-fragment | NA    | 0     |
| S16_extracted_5153         | 1375  | No | NA | 0  | 0 | Not-determined | Genome-fragment | NA    | 0     |
| S16_extracted_5240         | 6193  | No | NA | 0  | 4 | Not-determined | Genome-fragment | NA    | 0     |
| S16_vs_6918  full          | 2434  | No | NA | 0  | 0 | Low-quality    | Genome-fragment | 4.95  | 0     |
| S16_extracted_5263         | 1267  | No | NA | 0  | 1 | Not-determined | Genome-fragment | NA    | 0     |
| S16_extracted_5270         | 56086 | No | NA | 23 | 0 | Medium-quality | Genome-fragment | 89.07 | 0     |
| S16_extracted_5273         | 4109  | No | NA | 0  | 3 | Not-determined | Genome-fragment | NA    | 0     |
| S16_extracted_5289         | 1302  | No | NA | 0  | 0 | Not-determined | Genome-fragment | NA    | 0     |
| S12_extracted_k141_171710  | 2434  | No | NA | 0  | 2 |                |                 |       |       |



|                           |       |     |    |    |   |                |                 |       |       |
|---------------------------|-------|-----|----|----|---|----------------|-----------------|-------|-------|
| S16_extracted_7021        | 1455  | No  | NA | 0  | 1 | Not-determined | Genome-fragment | NA    | 0     |
| S16_extracted_7025        | 1236  | No  | NA | 0  | 1 | Not-determined | Genome-fragment | NA    | 0     |
| S16_vs_61112[full]        | 2437  | No  | NA | 0  | 2 | Low-quality    | Genome-fragment | NA    | 3.9   |
| S16_extracted_7071        | 1039  | No  | NA | 0  | 1 | Not-determined | Genome-fragment | NA    | 0     |
| S12_extracted_k141_129066 | 2438  | No  | NA | 1  | 0 | Low-quality    | Genome-fragment | NA    | 4.22  |
| S8_vs_k141_5593[full]     | 2438  | No  | NA | 0  | 2 | Low-quality    | Genome-fragment | NA    | 0     |
| S16_extracted_7164        | 1221  | No  | NA | 0  | 1 | Not-determined | Genome-fragment | NA    | 0     |
| S14_vs_k141_32105[full]   | 2439  | No  | NA | 2  | 0 | Low-quality    | Genome-fragment | NA    | 3.03  |
| S16_extracted_7114        | 11100 | No  | NA | 0  | 5 | Not-determined | Genome-fragment | NA    | 0     |
| S16_extracted_7319        | 1128  | No  | NA | 0  | 1 | Not-determined | Genome-fragment | NA    | 0     |
| S16_extracted_7335        | 9297  | No  | NA | 0  | 8 | Not-determined | Genome-fragment | NA    | 0     |
| S16_extracted_7372        | 1640  | No  | NA | 0  | 2 | Not-determined | Genome-fragment | NA    | 0     |
| S16_extracted_7374        | 23085 | No  | NA | 0  | 6 | Not-determined | Genome-fragment | NA    | 0     |
| S16_extracted_7387        | 1909  | No  | NA | 0  | 1 | Not-determined | Genome-fragment | NA    | 0     |
| S16_extracted_7429        | 1045  | No  | NA | 0  | 1 | Not-determined | Genome-fragment | NA    | 0     |
| S16_extracted_7448        | 3624  | No  | NA | 0  | 1 | Not-determined | Genome-fragment | NA    | 0     |
| S7_extracted_32050        | 2439  | No  | NA | 2  | 0 | Low-quality    | Genome-fragment | NA    | 7.04  |
| S16_extracted_7548        | 4061  | No  | NA | 0  | 2 | Not-determined | Genome-fragment | NA    | 0     |
| S16_vs_157099[full]       | 2439  | No  | NA | 0  | 0 | Low-quality    | Genome-fragment | NA    | 5.87  |
| S16_extracted_7653        | 4242  | No  | NA | 0  | 2 | Not-determined | Genome-fragment | NA    | 0     |
| S8_vs_k141_169514[full]   | 2439  | No  | NA | 0  | 1 | Low-quality    | Genome-fragment | NA    | 1.93  |
| S14_vs_k141_49179[full]   | 2440  | Yes | NA | 1  | 1 | Low-quality    | Genome-fragment | NA    | 1.48  |
| S16_extracted_7882        | 2957  | No  | NA | 0  | 2 | Not-determined | Genome-fragment | NA    | 0     |
| S16_extracted_8157        | 1422  | No  | NA | 0  | 1 | Not-determined | Genome-fragment | NA    | 0     |
| S16_extracted_8260        | 1049  | No  | NA | 0  | 0 | Not-determined | Genome-fragment | NA    | 0     |
| S16_extracted_8289        | 1831  | No  | NA | 0  | 1 | Not-determined | Genome-fragment | NA    | 0     |
| S5_vs_k141_72838[full]    | 2440  | No  | NA | 1  | 0 | Low-quality    | Genome-fragment | NA    | 5.05  |
| S16_extracted_8360        | 4012  | No  | NA | 0  | 3 | Not-determined | Genome-fragment | NA    | 0     |
| S16_extracted_8446        | 2426  | No  | NA | 2  | 2 | Not-determined | Genome-fragment | NA    | 0     |
| S10_vs_34717[full]        | 2440  | No  | NA | 0  | 1 | Low-quality    | Genome-fragment | NA    | 2.13  |
| S17_vs_k141_107891[full]  | 2441  | No  | NA | 0  | 2 | Low-quality    | Genome-fragment | NA    | 2.18  |
| S16_extracted_8582        | 4708  | No  | NA | 4  | 2 | Not-determined | Genome-fragment | NA    | 0     |
| S16_extracted_8660        | 3097  | No  | NA | 0  | 2 | Not-determined | Genome-fragment | NA    | 0     |
| S14_vs_k141_54607[full]   | 2441  | No  | NA | 1  | 0 | Low-quality    | Genome-fragment | NA    | 5.71  |
| S16_extracted_8789        | 1666  | No  | NA | 0  | 1 | Not-determined | Genome-fragment | NA    | 0     |
| S16_extracted_8807        | 1150  | No  | NA | 0  | 1 | Not-determined | Genome-fragment | NA    | 0     |
| S16_extracted_8825        | 1599  | No  | NA | 0  | 0 | Not-determined | Genome-fragment | NA    | 0     |
| S3_extracted_k141_74234   | 2441  | No  | NA | 2  | 0 | Low-quality    | Genome-fragment | NA    | 1.86  |
| S3_vs_k141_12252[full]    | 2441  | No  | NA | 0  | 0 | Low-quality    | Genome-fragment | NA    | 6.99  |
| S16_extracted_8902        | 6950  | No  | NA | 0  | 1 | Not-determined | Genome-fragment | NA    | 0     |
| S16_extracted_8909        | 1305  | No  | NA | 0  | 0 | Not-determined | Genome-fragment | NA    | 0     |
| S16_vs_25842[full]        | 2441  | No  | NA | 0  | 1 | Low-quality    | Genome-fragment | NA    | 4.27  |
| S16_extracted_9088        | 1185  | No  | NA | 0  | 0 | Not-determined | Genome-fragment | NA    | 0     |
| S16_extracted_9128        | 3952  | No  | NA | 0  | 1 | Not-determined | Genome-fragment | NA    | 0     |
| S16_extracted_9241        | 8712  | No  | NA | 0  | 1 | Not-determined | Genome-fragment | NA    | 0     |
| S16_extracted_9260        | 1683  | No  | NA | 0  | 1 | Not-determined | Genome-fragment | NA    | 0     |
| S16_extracted_9270        | 64521 | No  | NA | 9  | 2 | Complete       | High-quality    | 100   | 0     |
| S16_extracted_9378        | 3459  | No  | NA | 0  | 2 | Not-determined | Genome-fragment | NA    | 0     |
| S10_extracted_13081       | 2441  | No  | NA | 0  | 0 | Low-quality    | Genome-fragment | NA    | 4.04  |
| S16_extracted_9398        | 1085  | No  | NA | 0  | 0 | Not-determined | Genome-fragment | NA    | 0     |
| S16_extracted_9411        | 2283  | No  | NA | 0  | 1 | Not-determined | Genome-fragment | NA    | 0     |
| S10_vs_1890[full]         | 2441  | No  | NA | 0  | 0 | Low-quality    | Genome-fragment | NA    | 0.61  |
| S15_vs_73891[full]        | 2441  | No  | NA | 0  | 3 | Low-quality    | Genome-fragment | NA    | 1.62  |
| S9_vs_k141_29255[full]    | 2442  | No  | NA | 3  | 0 | Low-quality    | Genome-fragment | NA    | 5.07  |
| S16_extracted_9617        | 1461  | No  | NA | 0  | 0 | Not-determined | Genome-fragment | NA    | 0     |
| S16_extracted_9762        | 4627  | No  | NA | 0  | 1 | Not-determined | Genome-fragment | NA    | 0     |
| S17_extracted_k141_127344 | 2443  | No  | NA | 0  | 0 | Low-quality    | Genome-fragment | NA    | 1.87  |
| S16_extracted_9896        | 9239  | No  | NA | 0  | 1 | Not-determined | Genome-fragment | NA    | 0     |
| S16_extracted_9954        | 1330  | No  | NA | 0  | 0 | Not-determined | Genome-fragment | NA    | 0     |
| S13_vs_137372[full]       | 2443  | No  | NA | 1  | 0 | Low-quality    | Genome-fragment | NA    | 1.49  |
| S14_vs_k141_58571[full]   | 2443  | No  | NA | 1  | 0 | Low-quality    | Genome-fragment | NA    | 1.64  |
| S1_extracted_k141_60853   | 2443  | No  | NA | 0  | 1 | Low-quality    | Genome-fragment | NA    | 4.26  |
| S16_extracted_10185       | 1481  | No  | NA | 0  | 0 | Not-determined | Genome-fragment | NA    | 0     |
| S16_extracted_10388       | 1459  | No  | NA | 0  | 1 | Not-determined | Genome-fragment | NA    | 0     |
| S16_extracted_10428       | 1455  | No  | NA | 0  | 2 | Not-determined | Genome-fragment | NA    | 0     |
| S1_vs_k141_46049[full]    | 2443  | No  | NA | 0  | 0 | Low-quality    | Genome-fragment | NA    | 7.4   |
| S16_extracted_10467       | 1011  | No  | NA | 0  | 0 | Not-determined | Genome-fragment | NA    | 0     |
| S8_vs_k141_207268[full]   | 2443  | No  | NA | 0  | 0 | Low-quality    | Genome-fragment | NA    | 2.72  |
| S16_extracted_10567       | 3415  | No  | NA | 1  | 1 | Not-determined | Genome-fragment | NA    | 0     |
| S9_vs_k141_88372[full]    | 2444  | No  | NA | 1  | 0 | Low-quality    | Genome-fragment | NA    | 3.46  |
| S16_extracted_10665       | 1808  | No  | NA | 0  | 1 | Not-determined | Genome-fragment | NA    | 0     |
| S16_extracted_10778       | 2030  | No  | NA | 0  | 7 | Not-determined | Genome-fragment | NA    | 0     |
| S16_extracted_10812       | 5464  | No  | NA | 0  | 6 | Not-determined | Genome-fragment | NA    | 0     |
| S14_vs_k141_25606[full]   | 2444  | No  | NA | 1  | 0 | Low-quality    | Genome-fragment | NA    | 4.56  |
| S16_vs_25806[full]        | 2444  | No  | NA | 2  | 0 | Low-quality    | Genome-fragment | NA    | 5.73  |
| S17_extracted_k141_34485  | 2445  | No  | NA | 1  | 0 | Low-quality    | Genome-fragment | NA    | 5.47  |
| S16_extracted_10943       | 1186  | No  | NA | 0  | 1 | Not-determined | Genome-fragment | NA    | 0     |
| S16_extracted_11041       | 1894  | No  | NA | 0  | 2 | Not-determined | Genome-fragment | NA    | 0     |
| S16_vs_156438[full]       | 2445  | No  | NA | 0  | 1 | Low-quality    | Genome-fragment | NA    | 1.25  |
| S16_extracted_11083       | 3429  | No  | NA | 0  | 1 | Not-determined | Genome-fragment | NA    | 0     |
| S12_vs_k141_29457[full]   | 2445  | No  | NA | 0  | 0 | Low-quality    | Genome-fragment | NA    | 0.57  |
| S16_extracted_11114       | 3308  | No  | NA | 0  | 2 | Not-determined | Genome-fragment | NA    | 0     |
| S16_extracted_11148       | 1712  | No  | NA | 0  | 0 | Not-determined | Genome-fragment | NA    | 0     |
| S16_extracted_11204       | 1961  | No  | NA | 0  | 0 | Not-determined | Genome-fragment | NA    | 0     |
| S16_extracted_11324       | 2295  | No  | NA | 0  | 1 | Not-determined | Genome-fragment | NA    | 0     |
| S16_extracted_11350       | 2080  | No  | NA | 0  | 0 | Not-determined | Genome-fragment | NA    | 0     |
| S15_extracted_59874       | 2445  | No  | NA | 0  | 1 | Low-quality    | Genome-fragment | NA    | 2.24  |
| S16_extracted_11446       | 1004  | No  | NA | 0  | 1 | Not-determined | Genome-fragment | NA    | 0     |
| S8_extracted_k141_194525  | 2445  | No  | NA | 0  | 0 | Low-quality    | Genome-fragment | NA    | 3.24  |
| S16_extracted_11524       | 1367  | No  | NA | 0  | 1 | Not-determined | Genome-fragment | NA    | 0     |
| S16_extracted_11611       | 6296  | No  | NA | 0  | 1 | Not-determined | Genome-fragment | NA    | 0     |
| S14_vs_k141_85054[full]   | 2446  | No  | NA | 0  | 1 | Low-quality    | Genome-fragment | NA    | 5.21  |
| S16_extracted_11674       | 1529  | No  | NA | 0  | 0 | Not-determined | Genome-fragment | NA    | 0     |
| S3_vs_k141_69503[full]    | 2446  | No  | NA | 1  | 0 | Low-quality    | Genome-fragment | NA    | 4.83  |
| S16_extracted_11812       | 1592  | No  | NA | 1  | 1 | Not-determined | Genome-fragment | NA    | 0     |
| S16_extracted_11815       | 1472  | No  | NA | 0  | 1 | Not-determined | Genome-fragment | NA    | 0     |
| S16_extracted_11828       | 1593  | No  | NA | 0  | 1 | Not-determined | Genome-fragment | NA    | 0     |
| S10_extracted_11304       | 2446  | No  | NA | 2  | 0 | Low-quality    | Genome-fragment | NA    | 3.39  |
| S16_extracted_11896       | 1833  | No  | NA | 0  | 2 | Not-determined | Genome-fragment | NA    | 0     |
| S16_extracted_11974       | 1108  | No  | NA | 0  | 1 | Not-determined | Genome-fragment | NA    | 0     |
| S9_vs_k141_34372[full]    | 2447  | No  | NA | 0  | 1 | Low-quality    | Genome-fragment | NA    | 3.02  |
| S16_extracted_12277       | 2015  | No  | NA | 0  | 0 | Not-determined | Genome-fragment | NA    | 0     |
| S9_vs_k141_20326[full]    | 2447  | No  | NA | 3  | 0 | Low-quality    | Genome-fragment | NA    | 5.29  |
| S14_vs_k141_106533[full]  | 2447  | No  | NA | 0  | 0 | Low-quality    | Genome-fragment | NA    | 7.17  |
| S1_vs_k141_36364[full]    | 2447  | No  | NA | 0  | 2 | Low-quality    | Genome-fragment | NA    | 1.92  |
| S16_extracted_12551       | 37871 | No  | NA | 14 | 0 | High-quality   | High-quality    | 91.98 | 0     |
| S16_extracted_12592       | 1084  | No  | NA | 0  | 0 | Not-determined | Genome-fragment | NA    | 0     |
| S16_extracted_12630       | 4364  | No  | NA | 0  | 3 | Not-determined | Genome-fragment | NA    | 0     |
| S12_vs_k141_161721[full]  | 2447  | No  | NA | 0  | 0 | Low-quality    | Genome-fragment | NA    | 4.17  |
| S16_extracted_12820       | 1467  | No  | NA | 0  | 1 | Not-determined | Genome-fragment | NA    | 0     |
| S16_extracted_12854       | 6174  | No  | NA | 0  | 4 | Not-determined | Genome-fragment | NA    | 0     |
| S16_extracted_12856       | 1089  | No  | NA | 0  | 0 | Not-determined | Genome-fragment | NA    | 0     |
| S16_extracted_12881       | 1665  | No  | NA | 0  | 0 | Not-determined | Genome-fragment | NA    | 0     |
| S16_extracted_12903       | 1839  | No  | NA | 0  | 2 | Not-determined | Genome-fragment | NA    | 0     |
| S16_extracted_12944       | 1278  | No  | NA | 0  | 1 | Not-determined | Genome-fragment | NA    | 0     |
| S16_extracted_12945       | 1351  | No  | NA | 0  | 1 | Not-determined | Genome-fragment | NA    | 0     |
| S16_extracted_12976       | 1724  | No  | NA | 0  | 1 | Not-determined | Genome-fragment | NA    | 0     |
| S9_vs_k141_3590[full]     | 2448  | No  | NA | 0  | 0 | Low-quality    | Genome-fragment | NA    | 6.44  |
| S16_extracted_13333       | 5184  | No  | NA | 0  | 1 | Not-determined | Genome-fragment | NA    | 0     |
| S16_extracted_13354       | 1689  | No  | NA | 0  | 0 | Not-determined | Genome-fragment | NA    | 0     |
| S16_extracted_13401       | 1290  | No  | NA | 0  | 0 | Not-determined | Genome-fragment | NA    | 0     |
| S16_extracted_13417       | 5312  | No  | NA | 0  | 1 | Not-determined | Genome-fragment | NA    | 0     |
| S1_vs_k141_19104[full]    | 2448  | No  | NA | 3  | 0 | Low-quality    | Genome-fragment | NA    | 5.08  |
| S7_vs_84526[full]         | 2448  | No  | NA | 1  | 0 | Low-quality    | Genome-fragment | NA    | 4.8   |
| S8_vs_k141_49407[full]    | 2448  | No  | NA | 0  | 0 | Low-quality    | Genome-fragment | NA    | 42.81 |
| S16_extracted_13755       | 6198  | No  | NA | 0  | 3 | Not-determined | Genome-fragment | NA    | 0     |
| S9_vs_k141_58564[full]    | 2449  | No  | NA | 0  | 2 | Low-quality    | Genome-fragment | NA    | 4.58  |
| S16_extracted_14017       | 3105  | No  | NA | 0  | 1 | Not-determined | Genome-fragment | NA    | 0     |
| S16_extracted_14030       | 7116  | No  | NA | 0  | 6 | Not-determined | Genome-fragment | NA    | 0     |
| S16_extracted_14106       | 4167  | No  | NA | 0  | 4 | Not-determined | Genome-fragment | NA    | 0     |
| S16_extracted_14123       | 1198  | No  | NA | 0  | 1 | Not-determined | Genome-fragment | NA    | 1.35  |
| S1_vs_k141_1407231[full]  | 2449  | No  | NA | 0  | 1 | Low-quality    | Genome-fragment | NA    | 0.99  |
| S12_vs_k141_44667[full]   | 2449  | No  | NA | 1  | 0 | Low-quality    | Genome-fragment | NA    | 4.07  |
| S16_extracted_14163       | 5172  | No  | NA | 0  | 1 | Not-determined | Genome-fragment | NA    | 0     |
| S16_extracted_14358       | 1395  | No  | NA | 0  | 1 | Not-determined | Genome-fragment | NA    | 0     |
| S16_extracted_14387       | 1637  | No  | NA | 0  | 1 | Not-determined | Genome-fragment | NA    | 0     |
| S16_extracted_14468       | 1335  | No  | NA | 0  | 1 | Not-determined | Genome-fragment | NA    | 0     |
| S1_extracted_k141_67361   | 2450  | No  | NA | 3  | 0 | Low-quality    | Genome-fragment | NA    | 4.08  |
| S16_extracted_14470       | 1010  | No  | NA | 0  | 0 | Not-determined | Genome-fragment | NA    | 0     |
| S16_extracted_14705       | 1812  | No  | NA | 0  | 0 | Not-determined | Genome-fragment | NA    | 0     |
| S3_vs_k141_18327[full]    | 2450  | No  | NA | 2  | 0 | Low-quality    | Genome-fragment | NA    | 5.27  |
| S16_extracted_14745       | 4566  | No  | NA | 0  | 0 | Not-determined | Genome-fragment | NA    | 0     |
| S16_extracted_14796       | 1199  | No  | NA | 0  | 0 | Not-determined | Genome-fragment | NA    | 0     |
| S16_extracted_14888       | 4755  | No  | NA | 0  | 0 | Not-determined | Genome-fragment | NA    | 0     |
| S16_extracted_14923       | 1151  | No  | NA | 0  | 0 | Not-determined | Genome-fragment | NA    | 0     |
| S16_extracted_15078       | 4069  | No  | NA | 0  | 2 | Not-determined | Genome-fragment | NA    | 0     |
| S16_extracted_15178       | 1026  | No  | NA | 0  | 0 | Not-determined | Genome-fragment | NA    | 0     |
| S16_extracted_15293       | 1201  | No  | NA | 0  | 0 | Not-determined | Genome-fragment | NA    | 0     |
| S16_extracted_15359       | 3414  | No  | NA | 0  | 2 | Not-determined | Genome-fragment | NA    | 0     |
| S10_vs_15103[full]        | 2450  | No  | NA | 1  | 0 | Low            |                 |       |       |



|                             |       |    |    |    |                |                 |                   |      |       |
|-----------------------------|-------|----|----|----|----------------|-----------------|-------------------|------|-------|
| S16_extracted_16725         | 1206  | No | NA | 0  | 1              | Not-determined  | Genome-fragment   | NA   | 0     |
| S5_vs_k141_975021[full]     | 2452  | No | NA | 0  | 0              | Low-quality     | Genome-fragment   | NA   | 5.5   |
| S16_extracted_16856         | 1370  | No | NA | 0  | 0              | Not-determined  | Genome-fragment   | NA   | 0     |
| S16_extracted_16861         | 1635  | No | NA | 0  | 0              | Not-determined  | Genome-fragment   | NA   | 0     |
| S16_extracted_16910         | 1108  | No | NA | 0  | 1              | Not-determined  | Genome-fragment   | NA   | 0     |
| S16_extracted_17190         | 1062  | No | NA | 0  | 1              | Not-determined  | Genome-fragment   | NA   | 0     |
| S16_extracted_17245         | 1647  | No | NA | 0  | 1              | Not-determined  | Genome-fragment   | NA   | 0     |
| S16_extracted_17286         | 1714  | No | NA | 0  | 2              | Not-determined  | Genome-fragment   | NA   | 0     |
| S16_extracted_17366         | 16047 | No | NA | 10 | Not-determined | Genome-fragment | NA                | 0    |       |
| S16_extracted_17404         | 1295  | No | NA | 0  | 1              | Not-determined  | Genome-fragment   | NA   | 0     |
| S16_extracted_17641         | 2691  | No | NA | 0  | 0              | Not-determined  | Genome-fragment   | NA   | 0     |
| S16_extracted_17801         | 1835  | No | NA | 0  | 3              | Not-determined  | Genome-fragment   | NA   | 0     |
| S16_extracted_17814         | 4319  | No | NA | 0  | 2              | Not-determined  | Genome-fragment   | NA   | 0     |
| S16_extracted_17888         | 2027  | No | NA | 0  | 0              | Not-determined  | Genome-fragment   | NA   | 0     |
| S7_vs_15473[full]           | 2452  | No | NA | 0  | 2              | Low-quality     | Genome-fragment   | NA   | 5.49  |
| S16_extracted_17938         | 1217  | No | NA | 0  | 2              | Not-determined  | Genome-fragment   | NA   | 0     |
| S16_extracted_17986         | 1472  | No | NA | 0  | 1              | Not-determined  | Genome-fragment   | NA   | 0     |
| S16_extracted_18041         | 1571  | No | NA | 0  | 2              | Not-determined  | Genome-fragment   | NA   | 0     |
| S16_extracted_18093         | 1410  | No | NA | 1  | 1              | Not-determined  | Genome-fragment   | NA   | 0     |
| S16_vs_51492[full]          | 2452  | No | NA | 1  | 0              | Low-quality     | Genome-fragment   | NA   | 3.51  |
| S16_extracted_18185         | 2020  | No | NA | 0  | 4              | Not-determined  | Genome-fragment   | NA   | 0     |
| S16_extracted_18194         | 2022  | No | NA | 0  | 1              | Not-determined  | Genome-fragment   | NA   | 0     |
| S16_extracted_18218         | 1290  | No | NA | 0  | 0              | Not-determined  | Genome-fragment   | NA   | 0     |
| S10_vs_58482[full]          | 2452  | No | NA | 3  | 0              | Low-quality     | Genome-fragment   | NA   | 5.63  |
| S16_extracted_18393         | 1165  | No | NA | 0  | 0              | Not-determined  | Genome-fragment   | NA   | 0     |
| S16_extracted_18487         | 1006  | No | NA | 0  | 0              | Not-determined  | Genome-fragment   | NA   | 0     |
| S16_extracted_18513         | 1915  | No | NA | 0  | 1              | Not-determined  | Genome-fragment   | NA   | 0     |
| S8_vs_k141_136782[full]     | 2452  | No | NA | 2  | 0              | Low-quality     | Genome-fragment   | NA   | 5.6   |
| S16_extracted_18573         | 3817  | No | NA | 3  | Not-determined | Genome-fragment | NA                | 0    |       |
| S8_vs_k141_181497[full]     | 2452  | No | NA | 1  | 0              | Low-quality     | Genome-fragment   | NA   | 3.07  |
| S16_extracted_18860         | 2927  | No | NA | 0  | 2              | Not-determined  | Genome-fragment   | NA   | 0     |
| S16_extracted_18864         | 1513  | No | NA | 0  | 0              | Not-determined  | Genome-fragment   | NA   | 0     |
| S7_vs_26748[full]           | 2453  | No | NA | 1  | 0              | Low-quality     | Genome-fragment   | NA   | 5.57  |
| S16_extracted_51452         | 2453  | No | NA | 1  | 0              | Low-quality     | Genome-fragment   | NA   | 2.23  |
| S8_vs_k141_90709[full]      | 2453  | No | NA | 0  | 0              | Low-quality     | Genome-fragment   | NA   | 3.97  |
| S16_extracted_18967         | 1017  | No | NA | 0  | 0              | Not-determined  | Genome-fragment   | NA   | 0     |
| S8_vs_k141_12732[full]      | 2453  | No | NA | 0  | 1              | Low-quality     | Genome-fragment   | NA   | 4.61  |
| S16_extracted_19135         | 2350  | No | NA | 0  | 3              | Not-determined  | Genome-fragment   | NA   | 0     |
| S16_extracted_19162         | 2563  | No | NA | 1  | 1              | Not-determined  | Genome-fragment   | NA   | 0     |
| S16_extracted_19180         | 1040  | No | NA | 0  | 0              | Not-determined  | Genome-fragment   | NA   | 0     |
| S16_extracted_19191         | 2875  | No | NA | 0  | 1              | Not-determined  | Genome-fragment   | NA   | 0     |
| S11_vs_k141_380621[12zgene] | 2454  | No | NA | 0  | 0              | Low-quality     | Genome-fragment   | NA   | 5.16  |
| S1_vs_k141_35740[full]      | 2454  | No | NA | 0  | 0              | Low-quality     | Genome-fragment   | NA   | 4.31  |
| S17_vs_k141_28009[full]     | 2455  | No | NA | 0  | 0              | Low-quality     | Genome-fragment   | NA   | 6.92  |
| S9_vs_k141_49538[full]      | 2455  | No | NA | 0  | 0              | Low-quality     | Genome-fragment   | NA   | 4.33  |
| S16_extracted_19516         | 1637  | No | NA | 0  | 2              | Not-determined  | Genome-fragment   | NA   | 0     |
| S16_extracted_19789         | 1832  | No | NA | 0  | 1              | Not-determined  | Genome-fragment   | NA   | 0     |
| S16_extracted_19812         | 10877 | No | NA | 0  | 7              | Not-determined  | Genome-fragment   | NA   | 0     |
| S16_extracted_19839         | 1006  | No | NA | 0  | 2              | Not-determined  | Genome-fragment   | NA   | 0     |
| S11_vs_k141_33184[full]     | 2455  | No | NA | 1  | 0              | Low-quality     | Genome-fragment   | NA   | 5.61  |
| S11_vs_k141_15994[full]     | 2455  | No | NA | 2  | 0              | Low-quality     | Genome-fragment   | NA   | 4.21  |
| S16_extracted_19915         | 9180  | No | NA | 3  | Not-determined | Genome-fragment | NA                | 0    |       |
| S16_extracted_20013         | 5699  | No | NA | 0  | 4              | Not-determined  | Genome-fragment   | NA   | 0     |
| S13_extracted_108832        | 2455  | No | NA | 1  | 0              | Low-quality     | Genome-fragment   | NA   | 2.56  |
| S1_vs_k141_139644[full]     | 2455  | No | NA | 0  | 0              | Low-quality     | Genome-fragment   | NA   | 4.07  |
| S16_extracted_20082         | 3285  | No | NA | 0  | 2              | Not-determined  | Genome-fragment   | NA   | 0     |
| S5_vs_k141_100985[full]     | 2455  | No | NA | 0  | 0              | Low-quality     | Genome-fragment   | NA   | 4.67  |
| S5_vs_k141_35847[12zgene]   | 2455  | No | NA | 1  | 0              | Low-quality     | Genome-fragment   | NA   | 6.14  |
| S16_extracted_20077         | 1366  | No | NA | 0  | 0              | Not-determined  | Genome-fragment   | NA   | 0     |
| S16_extracted_20534         | 1042  | No | NA | 0  | 1              | Not-determined  | Genome-fragment   | NA   | 0     |
| S16_extracted_20633         | 4195  | No | NA | 0  | 4              | Not-determined  | Genome-fragment   | NA   | 5.74  |
| S10_vs_122877[full]         | 2455  | No | NA | 0  | 0              | Low-quality     | Genome-fragment   | NA   | 3.55  |
| S10_vs_45624[full]          | 2455  | No | NA | 0  | 0              | Low-quality     | Genome-fragment   | NA   | 0     |
| S16_extracted_20822         | 5994  | No | NA | 0  | 0              | Not-determined  | Genome-fragment   | NA   | 0     |
| S16_extracted_20901         | 7412  | No | NA | 2  | Not-determined | Genome-fragment | NA                | 0    |       |
| S16_extracted_20918         | 1443  | No | NA | 0  | 0              | Not-determined  | Genome-fragment   | NA   | 0     |
| S16_extracted_20920         | 1072  | No | NA | 0  | 0              | Not-determined  | Genome-fragment   | NA   | 0     |
| S16_extracted_20936         | 3657  | No | NA | 0  | 0              | Not-determined  | Genome-fragment   | NA   | 0     |
| S16_extracted_20966         | 3282  | No | NA | 0  | 3              | Not-determined  | Genome-fragment   | NA   | 0     |
| S16_extracted_21002         | 1026  | No | NA | 0  | 0              | Not-determined  | Genome-fragment   | NA   | 0     |
| S8_vs_k141_157866[full]     | 2455  | No | NA | 0  | 1              | Low-quality     | Genome-fragment   | NA   | 0.87  |
| S16_extracted_21137         | 1236  | No | NA | 0  | 0              | Not-determined  | Genome-fragment   | NA   | 0     |
| S16_extracted_21176         | 4223  | No | NA | 0  | 0              | Not-determined  | Genome-fragment   | NA   | 0     |
| S16_extracted_21295         | 1564  | No | NA | 0  | 2              | Not-determined  | Genome-fragment   | NA   | 0     |
| S17_vs_k141_36393[full]     | 2456  | No | NA | 2  | Low-quality    | Genome-fragment | NA                | 1.53 |       |
| S16_extracted_21441         | 1395  | No | NA | 0  | 1              | Not-determined  | Genome-fragment   | NA   | 0     |
| S16_extracted_21473         | 1472  | No | NA | 0  | 0              | Not-determined  | Genome-fragment   | NA   | 0     |
| S16_extracted_21508         | 6199  | No | NA | 0  | 2              | Not-determined  | Genome-fragment   | NA   | 0     |
| S16_extracted_21521         | 1054  | No | NA | 1  | Not-determined | Genome-fragment | NA                | 0    |       |
| S16_extracted_21594         | 1059  | No | NA | 0  | 0              | Not-determined  | Genome-fragment   | NA   | 0     |
| S16_extracted_21601         | 4626  | No | NA | 0  | 1              | Not-determined  | Genome-fragment   | NA   | 0     |
| S16_extracted_21705         | 5086  | No | NA | 0  | 3              | Not-determined  | Genome-fragment   | NA   | 0     |
| S16_extracted_21734         | 1241  | No | NA | 0  | 1              | Not-determined  | Genome-fragment   | NA   | 0     |
| S16_extracted_21737         | 5504  | No | NA | 0  | 4              | Not-determined  | Genome-fragment   | NA   | 0     |
| S16_extracted_21754         | 3068  | No | NA | 0  | 1              | Not-determined  | Genome-fragment   | NA   | 0     |
| S16_extracted_21886         | 1052  | No | NA | 0  | 1              | Not-determined  | Genome-fragment   | NA   | 0     |
| S16_extracted_22163         | 3475  | No | NA | 0  | 3              | Not-determined  | Genome-fragment   | NA   | 0     |
| S14_extracted_k141_39786    | 2456  | No | NA | 5  | 0              | Low-quality     | Genome-fragment   | NA   | 8.01  |
| S14_vs_k141_106153[full]    | 2456  | No | NA | 0  | 0              | Low-quality     | Genome-fragment   | NA   | 11.55 |
| S16_extracted_22262         | 4313  | No | NA | 0  | 1              | Not-determined  | Genome-fragment   | NA   | 0     |
| S16_extracted_22287         | 1064  | No | NA | 0  | 1              | Not-determined  | Genome-fragment   | NA   | 0     |
| S16_extracted_22418         | 3772  | No | NA | 0  | 2              | Not-determined  | Genome-fragment   | NA   | 0     |
| S16_extracted_22482         | 1701  | No | NA | 0  | 3              | Not-determined  | Genome-fragment   | NA   | 0     |
| S12_extracted_k141_8451     | 2457  | No | NA | 1  | 2              | Low-quality     | Genome-fragment   | NA   | 1.42  |
| S1_extracted_k141_121087    | 2458  | No | NA | 0  | 0              | Low-quality     | Cartridge         | NA   | 2.49  |
| S16_extracted_22519         | 8852  | No | NA | 0  | 3              | Not-determined  | Genome-fragment   | NA   | 0     |
| S16_extracted_22712         | 1351  | No | NA | 0  | 1              | Not-determined  | Genome-fragment   | NA   | 0     |
| S16_extracted_22771         | 1478  | No | NA | 0  | 0              | Not-determined  | Genome-fragment   | NA   | 0     |
| S16_extracted_22848         | 1932  | No | NA | 0  | 2              | Not-determined  | Genome-fragment   | NA   | 0     |
| S16_extracted_22903         | 1265  | No | NA | 0  | 2              | Not-determined  | Genome-fragment   | NA   | 0     |
| S5_vs_k141_78161[full]      | 2458  | No | NA | 2  | 0              | Low-quality     | Genome-fragment   | NA   | 6.51  |
| S16_extracted_22933         | 3444  | No | NA | 0  | 2              | Not-determined  | Genome-fragment   | NA   | 0     |
| S16_extracted_22975         | 1010  | No | NA | 0  | 0              | Not-determined  | Genome-fragment   | NA   | 0     |
| S16_extracted_23011         | 5047  | No | NA | 0  | 3              | Not-determined  | Genome-fragment   | NA   | 0     |
| S16_extracted_23015         | 2226  | No | NA | 0  | 1              | Not-determined  | Genome-fragment   | NA   | 0     |
| S16_extracted_23086         | 1053  | No | NA | 0  | 0              | Not-determined  | Genome-fragment   | NA   | 0     |
| S16_extracted_23195         | 1390  | No | NA | 0  | 1              | Not-determined  | Genome-fragment   | NA   | 0     |
| S16_extracted_23240         | 1421  | No | NA | 0  | 2              | Not-determined  | Genome-fragment   | NA   | 0     |
| S16_extracted_23282         | 1340  | No | NA | 0  | 1              | Not-determined  | Genome-fragment   | NA   | 0     |
| S16_extracted_23346         | 2279  | No | NA | 0  | 0              | Not-determined  | Genome-fragment   | NA   | 0     |
| S16_extracted_23351         | 1194  | No | NA | 0  | 1              | Not-determined  | Genome-fragment   | NA   | 0     |
| S16_extracted_23363         | 1499  | No | NA | 0  | 1              | Not-determined  | Genome-fragment   | NA   | 0     |
| S2_vs_k141_11654[full]      | 2458  | No | NA | 2  | 0              | Low-quality     | Genome-fragment   | NA   | 3.45  |
| S16_extracted_23513         | 1088  | No | NA | 0  | 0              | Not-determined  | Genome-fragment   | NA   | 0     |
| S16_extracted_23519         | 5143  | No | NA | 0  | 4              | Not-determined  | Genome-fragment   | NA   | 0     |
| S16_extracted_23618         | 2569  | No | NA | 0  | 0              | Not-determined  | Genome-fragment   | NA   | 0     |
| S16_extracted_23653         | 3088  | No | NA | 0  | 0              | Not-determined  | Genome-fragment   | NA   | 0     |
| S1_extracted_k141_121087    | 2459  | No | NA | 2  | 0              | Low-quality     | Genome-fragment   | NA   | 2.49  |
| S12_vs_k141_24377[full]     | 2459  | No | NA | 0  | 1              | Low-quality     | Genome-fragment   | NA   | 1.36  |
| S16_extracted_23785         | 1075  | No | NA | 0  | 1              | Not-determined  | Genome-fragment   | NA   | 0     |
| S16_extracted_23787         | 1555  | No | NA | 0  | 0              | Not-determined  | Genome-fragment   | NA   | 0     |
| S3_vs_k141_49459[112zgene]  | 2460  | No | NA | 0  | 0              | Low-quality     | Genome-fragment   | NA   | 4.31  |
| S5_vs_k141_83993[full]      | 2460  | No | NA | 1  | 0              | Low-quality     | Genome-fragment   | NA   | 5.74  |
| S16_extracted_24047         | 3207  | No | NA | 0  | 0              | Not-determined  | Genome-fragment   | NA   | 0     |
| S16_extracted_24126         | 2845  | No | NA | 0  | 0              | Not-determined  | Genome-fragment   | NA   | 0     |
| S17_extracted_k141_40470    | 2461  | No | NA | 0  | 0              | Low-quality     | Genome-fragment   | NA   | 2.98  |
| S16_extracted_24237         | 1604  | No | NA | 0  | 1              | Not-determined  | Genome-fragment   | NA   | 0     |
| S12_extracted_k141_36445    | 2461  | No | NA | 0  | 0              | Low-quality     | Genome-fragment   | NA   | 5.4   |
| S16_extracted_24274         | 1094  | No | NA | 0  | 1              | Not-determined  | Genome-fragment   | NA   | 0     |
| S8_vs_k141_110513[full]     | 2461  | No | NA | 0  | 4              | Low-quality     | Genome-fragment   | NA   | 0.7   |
| S16_extracted_24315         | 2893  | No | NA | 0  | 3              | Not-determined  | Genome-fragment   | NA   | 0     |
| S16_extracted_24327         | 4739  | No | NA | 0  | 1              | Not-determined  | Genome-fragment   | NA   | 0     |
| S16_extracted_24347         | 1067  | No | NA | 0  | 1              | Not-determined  | Genome-fragment   | NA   | 0     |
| S16_extracted_24410         | 10972 | No | NA | 0  | 3              | Not-determined  | Genome-fragment   | NA   | 0     |
| S16_extracted_24503         | 2815  | No | NA | 0  | 0              | Not-determined  | Genome-fragment   | NA   | 0     |
| S16_extracted_24508         | 3398  | No | NA | 0  | 3              | Not-determined  | Genome-fragment   | NA   | 0     |
| S11_vs_k141_49433[full]     | 2462  | No | NA | 0  | 0              | Low-quality     | Genome-fragment   | NA   | 4.47  |
| S5_vs_k141_70025[full]      | 2462  | No | NA | 4  | 0              | Low-quality     | Genome-fragment   | NA   | 8.28  |
| S16_extracted_24663         | 4125  | No | NA | 0  | 3              | Not-determined  | Genome-fragment   | NA   | 0     |
| S16_extracted_24721         | 1266  | No | NA | 0  | 1              | Not-determined  | Genome-fragment   | NA   | 0     |
| S12_vs_k141_79749[full]     | 2462  | No | NA | 0  | 1              | Low-quality     | Genome-fragment   | NA   | 1.76  |
| S9_vs_k141_76761[full]      | 2463  | No | NA | 2  | 0              | Low-quality     | Genome-fragment   | NA   | 5.4   |
| S9_vs_k141_28360[full]      | 2463  | No | NA | 0  | 1              | Low-quality     | Genome-fragment   | NA   | 2.28  |
| S16_extracted_24908         | 1045  | No | NA | 0  | 1              | Not-determined  | Genome-fragment   | NA   | 0     |
| S11_vs_k141_101566[full]    | 2463  | No | NA | 0  | 0              | Low-quality     | Genome-fragment   | NA   | 1.6   |
| S16_extracted_25019         | 2199  | No | NA | 0  | 0              | Not-determined  | Genome-fragment   | NA   | 0     |
| S16_extracted_25026         | 9427  | No | NA | 0  | 3              | Not-determined  | Genome-fragment   | NA   | 0     |
| S16_extracted_25140         | 1084  | No | NA | 0  | 0              | Not-determined  | Genome-fragment   | NA   | 0     |
| S16_extracted_25243         | 4202  | No | NA | 0  | 0              | Not-determined  | Genome-fragment   | NA   | 0     |
| S16_extracted_25261         | 1140  | No | NA | 0  | 1              | Not-determined  | Genome-fragment</ |      |       |



|                           |       |    |    |    |    |                |                 |    |       |
|---------------------------|-------|----|----|----|----|----------------|-----------------|----|-------|
| S16_extracted_26816       | 2797  | No | NA | 0  | 1  | Not-determined | Genome-fragment | NA | 0     |
| S16_extracted_26817       | 3395  | No | NA | 0  | 0  | Not-determined | Genome-fragment | NA | 0     |
| S16_extracted_26930       | 3822  | No | NA | 0  | 3  | Not-determined | Genome-fragment | NA | 0     |
| S8_vs_k141_401731 full    | 2464  | No | NA | 0  | 1  | Low-quality    | Genome-fragment | NA | 1.93  |
| S5_vs_k141_386211 full    | 2465  | No | NA | 2  | 0  | Low-quality    | Genome-fragment | NA | 4.57  |
| S16_extracted_27020       | 1104  | No | NA | 0  | 1  | Not-determined | Genome-fragment | NA | 0     |
| S16_extracted_27069       | 3532  | No | NA | 0  | 5  | Not-determined | Genome-fragment | NA | 0     |
| S16_extracted_27194       | 1285  | No | NA | 0  | 2  | Not-determined | Genome-fragment | NA | 0     |
| S8_vs_k141_1234811 full   | 2465  | No | NA | 0  | 0  | Low-quality    | Genome-fragment | NA | 4.69  |
| S16_extracted_27485       | 8808  | No | NA | 0  | 12 | Not-determined | Genome-fragment | NA | 0     |
| S16_extracted_27708       | 1271  | No | NA | 0  | 1  | Not-determined | Genome-fragment | NA | 0     |
| S16_extracted_27717       | 1063  | No | NA | 0  | 0  | Not-determined | Genome-fragment | NA | 0     |
| S16_extracted_27754       | 1283  | No | NA | 0  | 0  | Not-determined | Genome-fragment | NA | 0     |
| S11_vs_k141_414221 full   | 2466  | No | NA | 0  | 3  | Low-quality    | Genome-fragment | NA | 1.09  |
| S14_vs_k141_369601 H2gene | 2466  | No | NA | 1  | 0  | Low-quality    | Genome-fragment | NA | 6.44  |
| S16_extracted_27844       | 2859  | No | NA | 0  | 0  | Not-determined | Genome-fragment | NA | 0     |
| S16_extracted_27848       | 1440  | No | NA | 0  | 0  | Not-determined | Genome-fragment | NA | 0     |
| S5_extracted_k141_96277   | 2466  | No | NA | 3  | 0  | Low-quality    | Genome-fragment | NA | 7.29  |
| S16_extracted_27862       | 1451  | No | NA | 1  | 0  | Not-determined | Genome-fragment | NA | 0     |
| S7_vs_540941 full         | 2466  | No | NA | 3  | 0  | Low-quality    | Genome-fragment | NA | 5.78  |
| S16_extracted_27979       | 1650  | No | NA | 0  | 1  | Not-determined | Genome-fragment | NA | 0     |
| S16_extracted_28118       | 1164  | No | NA | 0  | 1  | Not-determined | Genome-fragment | NA | 0     |
| S16_vs_1494671 H2gene     | 2466  | No | NA | 1  | 0  | Low-quality    | Genome-fragment | NA | 4.15  |
| S16_extracted_28203       | 4958  | No | NA | 0  | 1  | Not-determined | Genome-fragment | NA | 0     |
| S14_vs_k141_888481 full   | 2467  | No | NA | 1  | 0  | Low-quality    | Genome-fragment | NA | 4.94  |
| S16_extracted_28253       | 1278  | No | NA | 0  | 2  | Not-determined | Genome-fragment | NA | 0     |
| S16_extracted_28375       | 2151  | No | NA | 0  | 0  | Not-determined | Genome-fragment | NA | 0     |
| S16_extracted_28426       | 2093  | No | NA | 0  | 1  | Not-determined | Genome-fragment | NA | 0     |
| S14_vs_k141_252511 full   | 2467  | No | NA | 0  | 0  | Low-quality    | Genome-fragment | NA | 5.4   |
| S16_extracted_28580       | 5406  | No | NA | 0  | 1  | Not-determined | Genome-fragment | NA | 0     |
| S16_extracted_28643       | 3495  | No | NA | 0  | 2  | Not-determined | Genome-fragment | NA | 0     |
| S16_extracted_28801       | 1123  | No | NA | 1  | 1  | Not-determined | Genome-fragment | NA | 0     |
| S4_extracted_2523         | 2467  | No | NA | 2  | 0  | Low-quality    | Genome-fragment | NA | 6.01  |
| S16_extracted_28971       | 1800  | No | NA | 0  | 1  | Not-determined | Genome-fragment | NA | 0     |
| S17_vs_k141_679591 full   | 2468  | No | NA | 0  | 2  | Low-quality    | Genome-fragment | NA | 0.56  |
| S16_extracted_29042       | 3241  | No | NA | 0  | 1  | Not-determined | Genome-fragment | NA | 0     |
| S16_extracted_29159       | 1914  | No | NA | 0  | 0  | Not-determined | Genome-fragment | NA | 0     |
| S16_extracted_29169       | 3056  | No | NA | 0  | 0  | Not-determined | Genome-fragment | NA | 0     |
| S16_extracted_29196       | 2364  | No | NA | 0  | 2  | Not-determined | Genome-fragment | NA | 0     |
| S16_extracted_29344       | 1645  | No | NA | 0  | 1  | Not-determined | Genome-fragment | NA | 0     |
| S16_extracted_29392       | 6116  | No | NA | 0  | 2  | Not-determined | Genome-fragment | NA | 0     |
| S16_extracted_29393       | 3677  | No | NA | 0  | 2  | Not-determined | Genome-fragment | NA | 0     |
| S16_extracted_29597       | 4273  | No | NA | 0  | 2  | Not-determined | Genome-fragment | NA | 0     |
| S16_extracted_29610       | 1444  | No | NA | 0  | 1  | Not-determined | Genome-fragment | NA | 0     |
| S16_extracted_31715       | 2468  | No | NA | 0  | 0  | Low-quality    | Genome-fragment | NA | 4.1   |
| S16_vs_1160731 full       | 2468  | No | NA | 0  | 0  | Low-quality    | Genome-fragment | NA | 5.52  |
| S16_extracted_29736       | 1059  | No | NA | 0  | 2  | Not-determined | Genome-fragment | NA | 0     |
| S16_extracted_29804       | 6443  | No | NA | 0  | 5  | Not-determined | Genome-fragment | NA | 0     |
| S12_extracted_k141_175209 | 2468  | No | NA | 0  | 0  | Low-quality    | Genome-fragment | NA | 2.99  |
| S16_extracted_29879       | 5452  | No | NA | 0  | 4  | Not-determined | Genome-fragment | NA | 0     |
| S16_extracted_29974       | 3853  | No | NA | 0  | 0  | Not-determined | Genome-fragment | NA | 0     |
| S11_vs_k141_637071 full   | 2469  | No | NA | 0  | 0  | Low-quality    | Genome-fragment | NA | 4.89  |
| S16_extracted_30062       | 1131  | No | NA | 0  | 1  | Not-determined | Genome-fragment | NA | 0     |
| S7_vs_627851 full         | 2469  | No | NA | 0  | 0  | Low-quality    | Genome-fragment | NA | 4.43  |
| S16_extracted_30285       | 3249  | No | NA | 0  | 1  | Not-determined | Genome-fragment | NA | 0     |
| S16_extracted_30289       | 1036  | No | NA | 0  | 0  | Not-determined | Genome-fragment | NA | 0     |
| S10_vs_876671 full        | 2469  | No | NA | 0  | 0  | Low-quality    | Genome-fragment | NA | 6.31  |
| S16_extracted_30322       | 1370  | No | NA | 0  | 0  | Not-determined | Genome-fragment | NA | 0     |
| S16_extracted_30329       | 2302  | No | NA | 0  | 0  | Not-determined | Genome-fragment | NA | 0     |
| S16_extracted_30349       | 3892  | No | NA | 0  | 4  | Not-determined | Genome-fragment | NA | 0     |
| S16_extracted_30356       | 1256  | No | NA | 0  | 1  | Not-determined | Genome-fragment | NA | 0     |
| S16_extracted_30422       | 1008  | No | NA | 0  | 1  | Not-determined | Genome-fragment | NA | 0     |
| S16_extracted_30435       | 1427  | No | NA | 0  | 0  | Not-determined | Genome-fragment | NA | 0     |
| S16_extracted_30470       | 1722  | No | NA | 0  | 2  | Not-determined | Genome-fragment | NA | 0     |
| S16_extracted_30566       | 2464  | No | NA | 0  | 0  | Not-determined | Genome-fragment | NA | 0     |
| S16_extracted_30691       | 3001  | No | NA | 0  | 1  | Not-determined | Genome-fragment | NA | 0     |
| S16_extracted_30739       | 1671  | No | NA | 0  | 0  | Not-determined | Genome-fragment | NA | 0     |
| S16_extracted_30749       | 1013  | No | NA | 0  | 2  | Not-determined | Genome-fragment | NA | 0     |
| S16_extracted_30750       | 1226  | No | NA | 0  | 1  | Not-determined | Genome-fragment | NA | 0     |
| S16_extracted_30919       | 1204  | No | NA | 0  | 0  | Not-determined | Genome-fragment | NA | 0     |
| S16_extracted_30994       | 1903  | No | NA | 0  | 1  | Not-determined | Genome-fragment | NA | 0     |
| S16_extracted_31060       | 1257  | No | NA | 0  | 1  | Not-determined | Genome-fragment | NA | 0     |
| S16_extracted_31173       | 1232  | No | NA | 0  | 1  | Not-determined | Genome-fragment | NA | 0     |
| S16_extracted_31219       | 8577  | No | NA | 0  | 2  | Not-determined | Genome-fragment | NA | 0     |
| S16_extracted_31240       | 1000  | No | NA | 0  | 1  | Not-determined | Genome-fragment | NA | 0     |
| S16_extracted_31272       | 1144  | No | NA | 0  | 1  | Not-determined | Genome-fragment | NA | 0     |
| S16_extracted_31296       | 3831  | No | NA | 0  | 0  | Not-determined | Genome-fragment | NA | 0     |
| S16_extracted_31299       | 4406  | No | NA | 0  | 3  | Not-determined | Genome-fragment | NA | 0     |
| S8_vs_k141_1528311 full   | 2469  | No | NA | 0  | 0  | Low-quality    | Genome-fragment | NA | 5.14  |
| S9_vs_k141_905041 full    | 2470  | No | NA | 0  | 1  | Low-quality    | Genome-fragment | NA | 3.04  |
| S16_extracted_31366       | 4805  | No | NA | 0  | 1  | Not-determined | Genome-fragment | NA | 0     |
| S16_extracted_31392       | 1108  | No | NA | 0  | 0  | Not-determined | Genome-fragment | NA | 0     |
| S14_vs_k141_1063631 full  | 2470  | No | NA | 0  | 0  | Low-quality    | Genome-fragment | NA | 4.96  |
| S16_extracted_31409       | 1023  | No | NA | 0  | 0  | Not-determined | Genome-fragment | NA | 0     |
| S16_extracted_31417       | 1053  | No | NA | 0  | 1  | Not-determined | Genome-fragment | NA | 0     |
| S16_extracted_31435       | 1132  | No | NA | 0  | 1  | Not-determined | Genome-fragment | NA | 0     |
| S16_extracted_31439       | 1543  | No | NA | 0  | 2  | Not-determined | Genome-fragment | NA | 0     |
| S12_vs_k141_913091 full   | 2470  | No | NA | 0  | 1  | Low-quality    | Genome-fragment | NA | 1.64  |
| S16_extracted_31535       | 1345  | No | NA | 0  | 1  | Not-determined | Genome-fragment | NA | 0     |
| S16_extracted_31680       | 1048  | No | NA | 0  | 1  | Not-determined | Genome-fragment | NA | 0     |
| S16_extracted_31791       | 1145  | No | NA | 0  | 1  | Not-determined | Genome-fragment | NA | 0     |
| S16_extracted_31797       | 7939  | No | NA | 0  | 5  | Not-determined | Genome-fragment | NA | 0     |
| S16_extracted_31848       | 1255  | No | NA | 0  | 1  | Not-determined | Genome-fragment | NA | 0     |
| S16_extracted_31863       | 1050  | No | NA | 0  | 0  | Not-determined | Genome-fragment | NA | 0     |
| S16_extracted_31913       | 1826  | No | NA | 0  | 1  | Not-determined | Genome-fragment | NA | 0     |
| S16_extracted_31956       | 1624  | No | NA | 0  | 2  | Not-determined | Genome-fragment | NA | 0     |
| S16_extracted_32010       | 1001  | No | NA | 0  | 0  | Not-determined | Genome-fragment | NA | 0     |
| S16_extracted_32051       | 1581  | No | NA | 0  | 2  | Not-determined | Genome-fragment | NA | 0     |
| S16_extracted_32101       | 4760  | No | NA | 0  | 0  | Not-determined | Genome-fragment | NA | 0     |
| S16_extracted_32140       | 1389  | No | NA | 0  | 2  | Not-determined | Genome-fragment | NA | 0     |
| S16_extracted_32235       | 2083  | No | NA | 0  | 2  | Not-determined | Genome-fragment | NA | 0     |
| S8_vs_k141_768841 full    | 2470  | No | NA | 0  | 0  | Low-quality    | Genome-fragment | NA | 3.2   |
| S16_extracted_32359       | 28101 | No | NA | 10 | 0  | Medium-quality | Genome-fragment | NA | 59.6  |
| S11_vs_k141_752571 full   | 2471  | No | NA | 0  | 0  | Low-quality    | Genome-fragment | NA | 5.44  |
| S16_extracted_32558       | 1778  | No | NA | 0  | 0  | Not-determined | Genome-fragment | NA | 0     |
| S16_extracted_32686       | 1197  | No | NA | 0  | 0  | Not-determined | Genome-fragment | NA | 0     |
| S1_vs_k141_260621 full    | 2471  | No | NA | 1  | 0  | Low-quality    | Genome-fragment | NA | 5.44  |
| S17_vs_k141_370111 full   | 2472  | No | NA | 1  | 0  | Low-quality    | Genome-fragment | NA | 5.07  |
| S16_extracted_32858       | 1551  | No | NA | 0  | 1  | Not-determined | Genome-fragment | NA | 0     |
| S16_extracted_32886       | 3235  | No | NA | 0  | 0  | Not-determined | Genome-fragment | NA | 0     |
| S16_extracted_32921       | 1432  | No | NA | 0  | 0  | Not-determined | Genome-fragment | NA | 0     |
| S16_extracted_32952       | 1725  | No | NA | 0  | 1  | Not-determined | Genome-fragment | NA | 0     |
| S16_extracted_32957       | 1028  | No | NA | 0  | 0  | Not-determined | Genome-fragment | NA | 0     |
| S16_extracted_32994       | 2142  | No | NA | 0  | 0  | Not-determined | Genome-fragment | NA | 0     |
| S16_extracted_33118       | 1870  | No | NA | 0  | 0  | Not-determined | Genome-fragment | NA | 0     |
| S16_extracted_33218       | 17281 | No | NA | 29 | 0  | Medium-quality | Genome-fragment | NA | 57.01 |
| S7_vs_496931 full         | 2472  | No | NA | 0  | 3  | Low-quality    | Genome-fragment | NA | 3.25  |
| S16_extracted_33534       | 4345  | No | NA | 0  | 2  | Not-determined | Genome-fragment | NA | 0     |
| S16_extracted_33559       | 3320  | No | NA | 0  | 1  | Not-determined | Genome-fragment | NA | 0     |
| S7_vs_802081 full         | 2472  | No | NA | 1  | 0  | Low-quality    | Genome-fragment | NA | 5.98  |
| S7_vs_963951 full         | 2472  | No | NA | 0  | 1  | Low-quality    | Genome-fragment | NA | 4.01  |
| S16_vs_578661 full        | 2472  | No | NA | 0  | 1  | Low-quality    | Genome-fragment | NA | 1.09  |
| S16_extracted_33698       | 1672  | No | NA | 0  | 1  | Not-determined | Genome-fragment | NA | 0     |
| S16_extracted_33705       | 1038  | No | NA | 0  | 1  | Not-determined | Genome-fragment | NA | 0     |
| S16_vs_622791 full        | 2472  | No | NA | 0  | 0  | Low-quality    | Genome-fragment | NA | 3.11  |
| S16_extracted_33808       | 7170  | No | NA | 0  | 2  | Not-determined | Genome-fragment | NA | 0     |
| S10_vs_633181 full        | 2472  | No | NA | 0  | 2  | Low-quality    | Genome-fragment | NA | 1.48  |
| S16_extracted_34062       | 1791  | No | NA | 0  | 1  | Not-determined | Genome-fragment | NA | 0     |
| S16_extracted_34115       | 3822  | No | NA | 0  | 1  | Not-determined | Genome-fragment | NA | 0     |
| S16_extracted_34118       | 1116  | No | NA | 0  | 0  | Not-determined | Genome-fragment | NA | 0     |
| S9_vs_k141_480751 full    | 2473  | No | NA | 2  | 0  | Low-quality    | Genome-fragment | NA | 5.99  |
| S16_extracted_34323       | 7062  | No | NA | 0  | 1  | Not-determined | Genome-fragment | NA | 0     |
| S16_extracted_34344       | 1177  | No | NA | 0  | 1  | Not-determined | Genome-fragment | NA | 0     |
| S16_extracted_34410       | 5898  | No | NA | 0  | 6  | Not-determined | Genome-fragment | NA | 0     |
| S5_vs_k141_1141501 full   | 2473  | No | NA | 1  | 1  | Low-quality    | Genome-fragment | NA | 1.34  |
| S16_extracted_34475       | 1415  | No | NA | 0  | 0  | Not-determined | Genome-fragment | NA | 0     |
| S16_extracted_34624       | 1171  | No | NA | 0  | 0  | Not-determined | Genome-fragment | NA | 0     |
| S16_extracted_34627       | 1153  | No | NA | 0  | 0  | Not-determined | Genome-fragment | NA | 0     |
| S7_vs_1302731 H2gene      | 2473  | No | NA | 0  | 0  | Low-quality    | Genome-fragment | NA | 6.85  |
| S8_vs_k141_1147831 full   | 2473  | No | NA | 0  | 0  | Low-quality    | Genome-fragment | NA | 3.06  |
| S8_vs_k141_1796351 full   | 2473  | No | NA | 0  | 0  | Low-quality    | Genome-fragment | NA | 5.59  |
| S16_extracted_34883       | 4839  | No | NA | 0  | 1  | Not-determined | Genome-fragment | NA | 0     |
| S16_extracted_34900       | 1189  | No | NA | 0  | 2  | Not-determined | Genome-fragment | NA | 0     |
| S16_extracted_34904       | 1146  | No | NA | 0  | 1  | Not-determined | Genome-fragment | NA | 0     |
| S16_extracted_34966       | 5863  | No | NA | 0  | 1  | Not-determined | Genome-fragment | NA | 0     |
| S16_extracted_35055       | 1441  | No | NA | 0  | 2  | Not-determined | Genome-fragment | NA | 0     |
| S16_extracted_35103       | 1960  | No | NA | 0  | 1  | Not-determined | Genome-fragment | NA | 0     |
| S14_vs_k141_892501 full   | 2474  | No | NA | 0  | 0  | Low-quality    | Genome-fragment | NA | 4.9   |
| S16_extracted_35298       | 2813  | No | NA | 0  | 2  | Not-determined | Genome-fragment | NA | 0     |
| S16_extracted_35417       | 1076  | No | NA | 0  |    |                |                 |    |       |



|                          |       |     |      |   |    |                |                 |       |       |
|--------------------------|-------|-----|------|---|----|----------------|-----------------|-------|-------|
| S1_vs_k141_621871 full   | 2476  | No  | NA   | 0 | 0  | Low-quality    | Genome-fragment | 6.18  | 0     |
| S16_extracted_36548      | 4893  | No  | NA   | 0 | 4  | Not-determined | Genome-fragment | NA    | 0     |
| S16_extracted_36629      | 1497  | No  | NA   | 0 | 1  | Not-determined | Genome-fragment | NA    | 0     |
| S5_extracted_k141_90929  | 2476  | No  | NA   | 0 | 2  | Low-quality    | Genome-fragment | 1.24  | 0     |
| S8_vs_k141_167418 full   | 2476  | No  | NA   | 1 | 0  | Low-quality    | Genome-fragment | 4.45  | 0     |
| S16_extracted_36736      | 1182  | No  | NA   | 0 | 0  | Not-determined | Genome-fragment | NA    | 0     |
| S5_vs_k141_425344 full   | 2477  | No  | NA   | 0 | 4  | Low-quality    | Genome-fragment | 5.18  | 0     |
| S9_extracted_k141_20809  | 2478  | No  | NA   | 0 | 0  | Low-quality    | Genome-fragment | 1.39  | 0     |
| S11_vs_k141_682201 full  | 2478  | No  | NA   | 0 | 0  | Low-quality    | Genome-fragment | 5.15  | 0     |
| S16_extracted_36860      | 1308  | No  | NA   | 0 | 2  | Not-determined | Genome-fragment | NA    | 0     |
| S3_vs_k141_120910 full   | 2478  | No  | NA   | 0 | 2  | Low-quality    | Genome-fragment | 1.98  | 0     |
| S16_extracted_36958      | 1081  | No  | NA   | 0 | 1  | Not-determined | Genome-fragment | NA    | 0     |
| S16_extracted_37018      | 1386  | No  | NA   | 0 | 1  | Not-determined | Genome-fragment | NA    | 0     |
| S16_extracted_37073      | 5557  | No  | NA   | 0 | 3  | Not-determined | Genome-fragment | NA    | 0     |
| S16_extracted_37105      | 1223  | No  | NA   | 0 | 1  | Not-determined | Genome-fragment | NA    | 0     |
| S16_extracted_37126      | 4883  | No  | NA   | 0 | 0  | Not-determined | Genome-fragment | NA    | 0     |
| S16_extracted_37141      | 1757  | No  | NA   | 0 | 1  | Not-determined | Genome-fragment | NA    | 0     |
| S16_extracted_37218      | 2198  | No  | NA   | 0 | 0  | Not-determined | Genome-fragment | NA    | 0     |
| S16_extracted_37275      | 1583  | No  | NA   | 0 | 1  | Not-determined | Genome-fragment | NA    | 0     |
| S16_extracted_37392      | 1025  | No  | NA   | 0 | 0  | Not-determined | Genome-fragment | NA    | 0     |
| S16_extracted_37408      | 1682  | No  | NA   | 0 | 1  | Not-determined | Genome-fragment | NA    | 0     |
| S16_extracted_37529      | 1005  | No  | NA   | 0 | 1  | Not-determined | Genome-fragment | NA    | 0     |
| S16_extracted_37754      | 1038  | No  | NA   | 0 | 0  | Not-determined | Genome-fragment | NA    | 0     |
| S16_extracted_37796      | 1261  | No  | NA   | 0 | 0  | Not-determined | Genome-fragment | NA    | 0     |
| S16_extracted_37802      | 1151  | No  | NA   | 0 | 1  | Not-determined | Genome-fragment | NA    | 0     |
| S16_extracted_37912      | 6327  | No  | NA   | 0 | 0  | Not-determined | Genome-fragment | NA    | 0     |
| S7_vs_28000 full         | 2478  | No  | NA   | 1 | 0  | Low-quality    | Genome-fragment | 5.53  | 0     |
| S16_vs_47759 full        | 2478  | No  | NA   | 0 | 0  | Low-quality    | Genome-fragment | 1.96  | 0     |
| S16_extracted_38069      | 1967  | No  | NA   | 0 | 1  | Not-determined | Genome-fragment | NA    | 0     |
| S16_extracted_38208      | 6251  | No  | NA   | 0 | 3  | Not-determined | Genome-fragment | NA    | 0     |
| S16_extracted_38257      | 1141  | No  | NA   | 0 | 2  | Not-determined | Genome-fragment | NA    | 0     |
| S16_extracted_38297      | 1174  | No  | NA   | 0 | 1  | Not-determined | Genome-fragment | NA    | 0     |
| S16_extracted_38315      | 12937 | No  | NA   | 0 | 11 | Not-determined | Genome-fragment | NA    | 0     |
| S16_extracted_38392      | 5887  | No  | NA   | 0 | 2  | Not-determined | Genome-fragment | NA    | 0     |
| S16_extracted_38471      | 2071  | No  | NA   | 0 | 2  | Not-determined | Genome-fragment | NA    | 0     |
| S10_vs_618479 full       | 2478  | No  | NA   | 0 | 0  | Low-quality    | Genome-fragment | 5.53  | 0     |
| S8_vs_k141_435581 full   | 2478  | No  | NA   | 0 | 0  | Low-quality    | Genome-fragment | 6.25  | 0     |
| S16_extracted_38649      | 1528  | No  | NA   | 0 | 0  | Not-determined | Genome-fragment | NA    | 0     |
| S16_extracted_38667      | 1493  | No  | NA   | 0 | 1  | Not-determined | Genome-fragment | NA    | 0     |
| S16_extracted_38747      | 1022  | No  | NA   | 0 | 0  | Not-determined | Genome-fragment | NA    | 0     |
| S16_extracted_38750      | 12616 | No  | NA   | 0 | 10 | Not-determined | Genome-fragment | NA    | 0     |
| S16_extracted_38762      | 2015  | No  | NA   | 0 | 1  | Not-determined | Genome-fragment | NA    | 0     |
| S16_extracted_38821      | 4632  | No  | NA   | 0 | 2  | Not-determined | Genome-fragment | NA    | 0     |
| S16_extracted_38902      | 3375  | No  | NA   | 0 | 1  | Not-determined | Genome-fragment | NA    | 0     |
| S16_extracted_38932      | 1773  | No  | NA   | 0 | 1  | Not-determined | Genome-fragment | NA    | 0     |
| S16_extracted_38948      | 4418  | No  | NA   | 0 | 5  | Not-determined | Genome-fragment | NA    | 0     |
| S10_vs_493361 full       | 2479  | No  | NA   | 1 | 0  | Low-quality    | Genome-fragment | 6.8   | 0     |
| S8_vs_k141_1347761 full  | 2479  | No  | NA   | 2 | 0  | Low-quality    | Genome-fragment | 5.94  | 0     |
| S16_extracted_39062      | 1959  | No  | NA   | 0 | 0  | Not-determined | Genome-fragment | NA    | 0     |
| S16_extracted_39135      | 1389  | No  | NA   | 0 | 1  | Not-determined | Genome-fragment | NA    | 0     |
| S16_extracted_39145      | 1895  | No  | NA   | 0 | 1  | Not-determined | Genome-fragment | NA    | 0     |
| S16_extracted_39211      | 1400  | No  | NA   | 0 | 0  | Not-determined | Genome-fragment | NA    | 0     |
| S16_extracted_39265      | 1559  | No  | NA   | 0 | 1  | Not-determined | Genome-fragment | NA    | 0     |
| S3_vs_k141_647151 full   | 2480  | No  | NA   | 0 | 1  | Low-quality    | Genome-fragment | 5.24  | 0     |
| S16_extracted_39387      | 15623 | No  | NA   | 0 | 8  | Not-determined | Genome-fragment | NA    | 0     |
| S16_extracted_39610      | 5046  | No  | NA   | 0 | 0  | Not-determined | Genome-fragment | NA    | 0     |
| S16_extracted_39644      | 1049  | No  | NA   | 0 | 1  | Not-determined | Genome-fragment | NA    | 0     |
| S16_extracted_39734      | 2261  | No  | NA   | 0 | 1  | Not-determined | Genome-fragment | NA    | 0     |
| S16_extracted_39741      | 1104  | No  | NA   | 0 | 1  | Not-determined | Genome-fragment | NA    | 0     |
| S16_extracted_39759      | 3184  | No  | NA   | 0 | 1  | Not-determined | Genome-fragment | NA    | 0     |
| S5_vs_k141_445991 full   | 2480  | No  | NA   | 0 | 2  | Low-quality    | Genome-fragment | 1.14  | 0     |
| S16_extracted_39817      | 1012  | No  | NA   | 0 | 0  | Not-determined | Genome-fragment | NA    | 0     |
| S5_vs_k141_160231 full   | 2480  | No  | NA   | 0 | 0  | Low-quality    | Genome-fragment | 6.28  | 0     |
| S16_extracted_39947      | 1337  | No  | NA   | 0 | 0  | Not-determined | Genome-fragment | NA    | 0     |
| S7_vs_282181 full        | 2480  | No  | NA   | 0 | 0  | Low-quality    | Genome-fragment | 3.37  | 0     |
| S16_extracted_39965      | 4041  | No  | NA   | 0 | 2  | Not-determined | Genome-fragment | NA    | 0     |
| S16_extracted_40043      | 1359  | No  | NA   | 0 | 1  | Not-determined | Genome-fragment | NA    | 0     |
| S16_extracted_40247      | 1623  | No  | NA   | 0 | 1  | Not-determined | Genome-fragment | NA    | 0     |
| S16_extracted_40301      | 1103  | No  | NA   | 0 | 1  | Not-determined | Genome-fragment | NA    | 0     |
| S16_extracted_40319      | 1083  | No  | NA   | 0 | 1  | Not-determined | Genome-fragment | NA    | 0     |
| S16_extracted_40428      | 1210  | No  | NA   | 0 | 0  | Not-determined | Genome-fragment | NA    | 0     |
| S16_extracted_40479      | 1018  | No  | NA   | 0 | 1  | Not-determined | Genome-fragment | NA    | 0     |
| S16_extracted_40499      | 1339  | No  | NA   | 0 | 1  | Not-determined | Genome-fragment | NA    | 0     |
| S16_extracted_40520      | 1102  | No  | NA   | 0 | 0  | Not-determined | Genome-fragment | NA    | 0     |
| S10_vs_371211 full       | 2480  | No  | NA   | 0 | 0  | Low-quality    | Genome-fragment | 3.13  | 0     |
| S16_extracted_40743      | 3205  | No  | NA   | 0 | 1  | Not-determined | Genome-fragment | NA    | 0     |
| S16_extracted_40754      | 1732  | No  | NA   | 0 | 0  | Not-determined | Genome-fragment | NA    | 0     |
| S16_extracted_40802      | 1879  | No  | NA   | 0 | 0  | Not-determined | Genome-fragment | NA    | 0     |
| S16_extracted_40890      | 1214  | No  | NA   | 0 | 0  | Not-determined | Genome-fragment | NA    | 0     |
| S8_vs_k141_13271 full    | 2480  | No  | NA   | 0 | 0  | Low-quality    | Genome-fragment | 5.43  | 0     |
| S3_extracted_k141_116909 | 2481  | No  | NA   | 3 | 0  | Low-quality    | Genome-fragment | 1.47  | 0     |
| S16_extracted_41118      | 1102  | No  | NA   | 0 | 1  | Not-determined | Genome-fragment | NA    | 0     |
| S16_extracted_41128      | 1184  | No  | NA   | 0 | 1  | Not-determined | Genome-fragment | NA    | 0     |
| S8_extracted_k141_118917 | 2481  | No  | NA   | 0 | 2  | Low-quality    | Genome-fragment | 0.56  | 0     |
| S16_extracted_41250      | 3460  | No  | NA   | 0 | 1  | Not-determined | Genome-fragment | NA    | 0     |
| S16_extracted_41251      | 1258  | No  | NA   | 0 | 0  | Not-determined | Genome-fragment | NA    | 0     |
| S16_extracted_41316      | 2025  | No  | NA   | 0 | 1  | Not-determined | Genome-fragment | NA    | 0     |
| S16_extracted_41321      | 1306  | No  | NA   | 0 | 1  | Not-determined | Genome-fragment | NA    | 0     |
| S16_extracted_41434      | 1103  | No  | NA   | 0 | 0  | Not-determined | Genome-fragment | NA    | 0     |
| S1_extracted_k141_102211 | 2482  | No  | NA   | 0 | 0  | Low-quality    | Genome-fragment | 4.35  | 0     |
| S1_vs_k141_178381 full   | 2482  | No  | NA   | 0 | 0  | Low-quality    | Genome-fragment | 5.09  | 0     |
| S1_vs_k141_1061971 full  | 2482  | No  | NA   | 0 | 0  | Low-quality    | Genome-fragment | 4.75  | 0     |
| S16_extracted_41648      | 1480  | No  | NA   | 0 | 1  | Not-determined | Genome-fragment | NA    | 0     |
| S5_vs_k141_51211 full    | 2482  | No  | NA   | 1 | 0  | Low-quality    | Genome-fragment | 7.16  | 0     |
| S16_extracted_41712      | 1279  | No  | NA   | 0 | 1  | Not-determined | Genome-fragment | NA    | 0     |
| S16_extracted_41762      | 1411  | No  | NA   | 0 | 2  | Not-determined | Genome-fragment | NA    | 0     |
| S16_extracted_41783      | 1386  | No  | NA   | 0 | 1  | Not-determined | Genome-fragment | NA    | 0     |
| S7_vs_1346471 full       | 2482  | No  | NA   | 1 | 0  | Low-quality    | Genome-fragment | 5.95  | 0     |
| S17_extracted_k141_38239 | 2483  | No  | NA   | 0 | 0  | Low-quality    | Genome-fragment | 5.51  | 0     |
| S16_extracted_42101      | 1224  | No  | NA   | 0 | 0  | Not-determined | Genome-fragment | NA    | 0     |
| S16_extracted_42126      | 1824  | No  | NA   | 0 | 2  | Not-determined | Genome-fragment | NA    | 0     |
| S16_extracted_42137      | 1194  | No  | NA   | 0 | 1  | Not-determined | Genome-fragment | NA    | 0     |
| S1_vs_k141_1448531 full  | 2483  | No  | NA   | 1 | 0  | Low-quality    | Genome-fragment | 6.34  | 0     |
| S16_extracted_42280      | 1071  | No  | NA   | 0 | 1  | Not-determined | Genome-fragment | NA    | 0     |
| S16_extracted_42322      | 1294  | No  | NA   | 0 | 1  | Not-determined | Genome-fragment | NA    | 0     |
| S16_extracted_42431      | 2107  | No  | NA   | 0 | 2  | Not-determined | Genome-fragment | NA    | 0     |
| S16_extracted_42455      | 1446  | No  | NA   | 0 | 1  | Not-determined | Genome-fragment | NA    | 0     |
| S3_extracted_k141_98004  | 2483  | No  | NA   | 2 | 0  | Low-quality    | Genome-fragment | 5.72  | 0     |
| S16_extracted_42708      | 1398  | No  | NA   | 0 | 1  | Not-determined | Genome-fragment | NA    | 0     |
| S16_extracted_42758      | 3439  | No  | NA   | 0 | 3  | Not-determined | Genome-fragment | NA    | 0     |
| S16_extracted_42827      | 1297  | No  | NA   | 0 | 1  | Not-determined | Genome-fragment | NA    | 0     |
| S16_extracted_42839      | 1995  | No  | NA   | 0 | 1  | Not-determined | Genome-fragment | NA    | 0     |
| S16_extracted_42892      | 5453  | No  | NA   | 0 | 1  | Not-determined | Genome-fragment | NA    | 0     |
| S3_vs_k141_306781 full   | 2483  | No  | NA   | 0 | 0  | Low-quality    | Genome-fragment | 6.55  | 0     |
| S16_extracted_42920      | 1657  | No  | NA   | 0 | 1  | Not-determined | Genome-fragment | NA    | 0     |
| S16_extracted_42980      | 1308  | No  | NA   | 0 | 0  | Not-determined | Genome-fragment | NA    | 0     |
| S16_extracted_43044      | 4474  | No  | NA   | 0 | 2  | Not-determined | Genome-fragment | NA    | 0     |
| S2_vs_k141_34131 full    | 2483  | No  | NA   | 0 | 2  | Low-quality    | Genome-fragment | 1.45  | 0     |
| S16_extracted_43145      | 1146  | No  | NA   | 0 | 0  | Not-determined | Genome-fragment | NA    | 0     |
| S16_extracted_43200      | 1262  | No  | NA   | 0 | 1  | Not-determined | Genome-fragment | NA    | 0     |
| S16_extracted_43201      | 3566  | No  | NA   | 0 | 4  | Not-determined | Genome-fragment | NA    | 0     |
| S2_extracted_k141_142011 | 2483  | No  | NA   | 0 | 0  | Low-quality    | Genome-fragment | 1.78  | 0     |
| S5_vs_k141_848431 full   | 2483  | No  | NA   | 0 | 0  | Low-quality    | Genome-fragment | 7.4   | 0     |
| S16_extracted_43288      | 1042  | No  | NA   | 0 | 1  | Not-determined | Genome-fragment | NA    | 0     |
| S16_extracted_43293      | 3704  | No  | NA   | 0 | 2  | Not-determined | Genome-fragment | NA    | 0     |
| S16_extracted_20056      | 2483  | No  | NA   | 0 | 1  | Low-quality    | Genome-fragment | 3.71  | 0     |
| S16_extracted_43409      | 1794  | No  | NA   | 0 | 1  | Not-determined | Genome-fragment | NA    | 0     |
| S16_extracted_43547      | 3174  | No  | NA   | 0 | 1  | Not-determined | Genome-fragment | NA    | 0     |
| S16_extracted_43576      | 3674  | No  | NA   | 0 | 1  | Not-determined | Genome-fragment | NA    | 0     |
| S16_vs_27631 full        | 2483  | No  | NA   | 0 | 0  | Low-quality    | Genome-fragment | 1.94  | 0     |
| S16_vs_1558641 full      | 2483  | No  | NA   | 0 | 0  | Low-quality    | Genome-fragment | 3.08  | 0     |
| S10_vs_1159351 full      | 2483  | No  | NA   | 4 | 0  | Low-quality    | Genome-fragment | 6.1   | 0     |
| S16_extracted_43779      | 9747  | No  | NA   | 0 | 2  | Not-determined | Genome-fragment | NA    | 0     |
| S16_extracted_43780      | 4653  | No  | NA   | 0 | 1  | Not-determined | Genome-fragment | NA    | 0     |
| S16_extracted_43823      | 6242  | No  | NA   | 0 | 3  | Not-determined | Genome-fragment | NA    | 0     |
| S11_vs_k141_799931 full  | 2484  | No  | NA   | 3 | 0  | Low-quality    | Genome-fragment | 6.1   | 0     |
| S14_extracted_k141_52280 | 2484  | No  | NA   | 6 | 0  | Low-quality    | Genome-fragment | 8.17  | 0     |
| S16_extracted_43997      | 1198  | No  | NA   | 0 | 1  | Not-determined | Genome-fragment | NA    | 0     |
| S16_extracted_44071      | 2151  | No  | NA   | 0 | 0  | Not-determined | Genome-fragment | NA    | 0     |
| S16_extracted_44222      | 2062  | No  | NA   | 0 | 3  | Not-determined | Genome-fragment | NA    | 0     |
| S16_extracted_44259      | 3071  | No  | NA   | 0 | 2  | Not-determined | Genome-fragment | NA    | 0     |
| S3_extracted_k141_25733  | 2484  | No  | NA   | 3 | 0  | Low-quality    | Genome-fragment | 11.33 | 0     |
| S16_extracted_44302      | 3905  | No  | NA   | 0 | 1  | Not-determined | Genome-fragment | NA    | 0     |
| S16_extracted_44372      | 5128  | No  | NA   | 0 | 3  | Not-determined | Genome-fragment | NA    | 0     |
| S16_extracted_44485      | 1071  | No  | NA   | 0 | 0  | Not-determined | Genome-fragment | NA    | 0     |
| S12_vs_k141_190111 full  | 2484  | Yes | 1998 | 1 | 2  | Low-quality    | Genome-fragment | 0.96  | 19.57 |
| S14_vs_k141_455261 full  | 2485  | No  | NA   | 0 | 0  | Low-quality    | Genome-fragment | 6.82  | 0     |
| S16_extracted_44695      | 1110  | No  | NA   | 0 | 0  | Not-determined | Genome-fragment | NA    | 0     |
| S16_extracted_44815      | 8912  | No  | NA   | 0 | 5  | Not-determined | Genome-fragment | NA    | 0     |
| S16_extracted_44849      | 1212  | No  |      |   |    |                |                 |       |       |



|                          |       |     |      |    |   |                |                 |       |      |
|--------------------------|-------|-----|------|----|---|----------------|-----------------|-------|------|
| S16_extracted_46192      | 1009  | No  | NA   | 0  | 1 | Not-determined | Genome-fragment | NA    | 0    |
| S16_extracted_46213      | 3882  | No  | NA   | 0  | 1 | Not-determined | Genome-fragment | NA    | 0    |
| S16_extracted_46650      | 1031  | No  | NA   | 0  | 0 | Not-determined | Genome-fragment | NA    | 0    |
| S16_extracted_46653      | 3973  | No  | NA   | 0  | 3 | Not-determined | Genome-fragment | NA    | 0    |
| S16_extracted_46659      | 5300  | No  | NA   | 0  | 2 | Not-determined | Genome-fragment | NA    | 0    |
| S16_extracted_46761      | 3069  | No  | NA   | 0  | 1 | Not-determined | Genome-fragment | NA    | 0    |
| S16_extracted_46800      | 1126  | No  | NA   | 0  | 1 | Not-determined | Genome-fragment | NA    | 0    |
| S16_extracted_46839      | 4233  | No  | NA   | 0  | 3 | Not-determined | Genome-fragment | NA    | 0    |
| S10_vs_1328  full        | 2489  | No  | NA   | 0  | 1 | Low-quality    | Genome-fragment | 1.34  | 0    |
| S16_extracted_46953      | 1545  | No  | NA   | 0  | 0 | Not-determined | Genome-fragment | NA    | 0    |
| S16_extracted_46987      | 1198  | No  | NA   | 0  | 0 | Not-determined | Genome-fragment | NA    | 0    |
| S16_extracted_47104      | 1732  | No  | NA   | 0  | 2 | Not-determined | Genome-fragment | NA    | 0    |
| S16_extracted_47179      | 2158  | No  | NA   | 0  | 1 | Not-determined | Genome-fragment | NA    | 0    |
| S16_extracted_47270      | 2487  | No  | NA   | 0  | 0 | Not-determined | Genome-fragment | NA    | 0    |
| S16_extracted_47277      | 1869  | No  | NA   | 0  | 1 | Not-determined | Genome-fragment | NA    | 0    |
| S16_extracted_47323      | 2974  | No  | NA   | 0  | 0 | Not-determined | Genome-fragment | NA    | 0    |
| S17_vs_k141_174324  full | 2490  | No  | NA   | 0  | 2 | Low-quality    | Genome-fragment | 1.99  | 0    |
| S16_extracted_47400      | 2344  | No  | NA   | 0  | 1 | Not-determined | Genome-fragment | NA    | 0    |
| S16_extracted_47412      | 1222  | No  | NA   | 0  | 1 | Not-determined | Genome-fragment | NA    | 0    |
| S3_extracted_k141_84166  | 2490  | No  | NA   | 0  | 0 | Low-quality    | Genome-fragment | 4.57  | 0    |
| S16_extracted_47757      | 1023  | No  | NA   | 0  | 1 | Not-determined | Genome-fragment | NA    | 0    |
| S5_vs_k141_14877  full   | 2490  | No  | NA   | 1  | 0 | Low-quality    | Genome-fragment | 1.7   | 0    |
| S16_extracted_47819      | 1165  | No  | NA   | 0  | 0 | Not-determined | Genome-fragment | NA    | 0    |
| S16_extracted_47851      | 1122  | No  | NA   | 0  | 0 | Not-determined | Genome-fragment | NA    | 0    |
| S16_extracted_47949      | 1161  | No  | NA   | 0  | 2 | Not-determined | Genome-fragment | NA    | 0    |
| S16_extracted_47983      | 1615  | No  | NA   | 0  | 0 | Not-determined | Genome-fragment | NA    | 0    |
| S5_vs_k141_123865  full  | 2490  | No  | NA   | 0  | 3 | Low-quality    | Genome-fragment | 2.01  | 0    |
| S16_extracted_48016      | 4926  | No  | NA   | 0  | 3 | Not-determined | Genome-fragment | NA    | 0    |
| S10_extracted_34763      | 2490  | No  | NA   | 0  | 0 | Low-quality    | Genome-fragment | 5.44  | 0    |
| S16_extracted_48247      | 6170  | No  | NA   | 0  | 5 | Not-determined | Genome-fragment | NA    | 0    |
| S10_vs_112570  full      | 2491  | No  | NA   | 2  | 0 | Low-quality    | Genome-fragment | 5.27  | 0    |
| S16_extracted_48319      | 3449  | No  | NA   | 0  | 2 | Not-determined | Genome-fragment | NA    | 0    |
| S16_extracted_48379      | 2191  | No  | NA   | 0  | 1 | Not-determined | Genome-fragment | NA    | 0    |
| S12_vs_k141_24396  full  | 2491  | No  | NA   | 1  | 0 | Low-quality    | Genome-fragment | 4.56  | 0    |
| S12_vs_k141_27934  full  | 2491  | No  | NA   | 0  | 0 | Low-quality    | Genome-fragment | 2.82  | 0    |
| S15_vs_173338  full      | 2491  | No  | NA   | 0  | 0 | Low-quality    | Genome-fragment | 1.44  | 0    |
| S5_vs_k141_86735  full   | 2492  | No  | NA   | 1  | 0 | Low-quality    | Genome-fragment | 4.32  | 0    |
| S5_vs_k141_134972  full  | 2492  | No  | NA   | 5  | 0 | Low-quality    | Genome-fragment | 5.89  | 0    |
| S16_extracted_48697      | 7574  | No  | NA   | 0  | 4 | Not-determined | Genome-fragment | NA    | 0    |
| S16_extracted_48809      | 1156  | No  | NA   | 0  | 0 | Not-determined | Genome-fragment | NA    | 0    |
| S16_extracted_48923      | 1419  | No  | NA   | 0  | 1 | Not-determined | Genome-fragment | NA    | 0    |
| S16_extracted_49006      | 1782  | No  | NA   | 0  | 1 | Not-determined | Genome-fragment | NA    | 0    |
| S16_extracted_49090      | 9129  | No  | NA   | 0  | 6 | Not-determined | Genome-fragment | NA    | 0    |
| S7_vs_27963  full        | 2492  | No  | NA   | 2  | 0 | Low-quality    | Genome-fragment | 5.23  | 0    |
| S7_vs_81106  full        | 2492  | No  | NA   | 1  | 0 | Low-quality    | Genome-fragment | 7.67  | 0    |
| S16_extracted_49360      | 1083  | No  | NA   | 0  | 2 | Not-determined | Genome-fragment | NA    | 0    |
| S16_extracted_49376      | 1289  | No  | NA   | 0  | 1 | Not-determined | Genome-fragment | NA    | 0    |
| S16_extracted_49409      | 6689  | No  | NA   | 0  | 3 | Not-determined | Genome-fragment | NA    | 0    |
| S7_vs_9779  full         | 2492  | No  | NA   | 0  | 0 | Low-quality    | Genome-fragment | 1.53  | 0    |
| S16_extracted_49534      | 1363  | No  | NA   | 0  | 0 | Not-determined | Genome-fragment | NA    | 0    |
| S8_vs_k141_3894  full    | 2492  | No  | NA   | 0  | 2 | Low-quality    | Genome-fragment | 3.02  | 0    |
| S16_extracted_49608      | 1091  | No  | NA   | 0  | 1 | Not-determined | Genome-fragment | NA    | 0    |
| S16_extracted_49720      | 1475  | No  | NA   | 0  | 0 | Not-determined | Genome-fragment | NA    | 0    |
| S16_extracted_49789      | 1700  | No  | NA   | 0  | 3 | Not-determined | Genome-fragment | NA    | 0    |
| S5_extracted_k141_79344  | 2493  | No  | NA   | 1  | 0 | Low-quality    | Genome-fragment | 6.16  | 0    |
| S16_extracted_50080      | 1003  | No  | NA   | 0  | 1 | Not-determined | Genome-fragment | NA    | 0    |
| S16_extracted_50125      | 4081  | No  | NA   | 0  | 1 | Not-determined | Genome-fragment | NA    | 0    |
| S16_extracted_50166      | 1582  | No  | NA   | 0  | 1 | Not-determined | Genome-fragment | NA    | 0    |
| S16_extracted_50205      | 1559  | No  | NA   | 0  | 0 | Not-determined | Genome-fragment | NA    | 0    |
| S16_extracted_50295      | 2705  | No  | NA   | 0  | 1 | Not-determined | Genome-fragment | NA    | 0    |
| S16_extracted_50309      | 4116  | No  | NA   | 0  | 4 | Not-determined | Genome-fragment | NA    | 0    |
| S16_extracted_50354      | 4146  | No  | NA   | 0  | 2 | Not-determined | Genome-fragment | NA    | 0    |
| S16_extracted_50360      | 1018  | No  | NA   | 0  | 1 | Not-determined | Genome-fragment | NA    | 0    |
| S16_extracted_50503      | 1744  | No  | NA   | 0  | 1 | Not-determined | Genome-fragment | NA    | 0    |
| S5_vs_k141_140279  full  | 2493  | No  | NA   | 0  | 0 | Low-quality    | Genome-fragment | 2.69  | 0    |
| S16_extracted_50671      | 1002  | No  | NA   | 0  | 0 | Not-determined | Genome-fragment | NA    | 0    |
| S10_vs_100440  full      | 2493  | No  | NA   | 1  | 0 | Low-quality    | Genome-fragment | 1.93  | 0    |
| S16_extracted_50780      | 1661  | No  | NA   | 0  | 0 | Not-determined | Genome-fragment | NA    | 0    |
| S16_extracted_50945      | 3102  | No  | NA   | 0  | 0 | Not-determined | Genome-fragment | NA    | 0    |
| S14_vs_k141_7943  full   | 2494  | Yes | 1030 | 1  | 1 | Low-quality    | Genome-fragment | 0.63  | 58.7 |
| S16_extracted_51054      | 1178  | No  | NA   | 0  | 1 | Not-determined | Genome-fragment | NA    | 0    |
| S16_extracted_51057      | 1438  | No  | NA   | 0  | 0 | Not-determined | Genome-fragment | NA    | 0    |
| S16_extracted_51101      | 3587  | No  | NA   | 0  | 1 | Not-determined | Genome-fragment | NA    | 0    |
| S16_extracted_51242      | 4409  | No  | NA   | 0  | 2 | Not-determined | Genome-fragment | NA    | 0    |
| S16_extracted_51307      | 1153  | No  | NA   | 0  | 1 | Not-determined | Genome-fragment | NA    | 0    |
| S16_extracted_51363      | 1101  | No  | NA   | 0  | 0 | Not-determined | Genome-fragment | NA    | 0    |
| S16_extracted_51367      | 1314  | No  | NA   | 0  | 1 | Not-determined | Genome-fragment | NA    | 0    |
| S1_vs_k141_99146  full   | 2494  | No  | NA   | 1  | 0 | Low-quality    | Genome-fragment | 6.4   | 0    |
| S16_extracted_51543      | 2190  | No  | NA   | 0  | 0 | Not-determined | Genome-fragment | NA    | 0    |
| S16_extracted_51554      | 5126  | No  | NA   | 0  | 3 | Not-determined | Genome-fragment | NA    | 0    |
| S5_extracted_k141_101556 | 2494  | No  | NA   | 3  | 0 | Low-quality    | Genome-fragment | 6.22  | 0    |
| S16_extracted_51755      | 1669  | No  | NA   | 0  | 3 | Not-determined | Genome-fragment | NA    | 0    |
| S16_extracted_51774      | 1718  | No  | NA   | 0  | 1 | Not-determined | Genome-fragment | NA    | 0    |
| S16_vs_119956  full      | 2494  | No  | NA   | 0  | 0 | Low-quality    | Genome-fragment | 4.21  | 0    |
| S16_extracted_51988      | 1814  | No  | NA   | 0  | 0 | Not-determined | Genome-fragment | NA    | 0    |
| S16_extracted_52104      | 2484  | No  | NA   | 0  | 2 | Not-determined | Genome-fragment | NA    | 0    |
| S16_extracted_52141      | 5518  | No  | NA   | 0  | 1 | Not-determined | Genome-fragment | NA    | 0    |
| S16_extracted_52186      | 1248  | No  | NA   | 0  | 1 | Not-determined | Genome-fragment | NA    | 0    |
| S16_extracted_52197      | 6483  | No  | NA   | 0  | 1 | Not-determined | Genome-fragment | NA    | 0    |
| S16_extracted_52242      | 1055  | No  | NA   | 0  | 1 | Not-determined | Genome-fragment | NA    | 0    |
| S16_extracted_52322      | 1873  | No  | NA   | 0  | 2 | Not-determined | Genome-fragment | NA    | 0    |
| S12_vs_k141_75054  full  | 2494  | No  | NA   | 0  | 0 | Low-quality    | Genome-fragment | 5.9   | 0    |
| S16_extracted_52417      | 4621  | No  | NA   | 0  | 0 | Not-determined | Genome-fragment | NA    | 0    |
| S16_extracted_52442      | 1796  | No  | NA   | 0  | 0 | Not-determined | Genome-fragment | NA    | 0    |
| S16_extracted_52513      | 40335 | No  | NA   | 14 | 2 | High-quality   | Genome-fragment | 90.74 | 0    |
| S16_extracted_52550      | 1841  | No  | NA   | 0  | 1 | Not-determined | Genome-fragment | NA    | 0    |
| S16_extracted_52564      | 1571  | No  | NA   | 0  | 1 | Not-determined | Genome-fragment | NA    | 0    |
| S13_vs_3763  full        | 2495  | No  | NA   | 0  | 2 | Low-quality    | Genome-fragment | 1.98  | 0    |
| S1_extracted_k141_36402  | 2495  | No  | NA   | 0  | 0 | Low-quality    | Genome-fragment | 3.1   | 0    |
| S5_vs_k141_42921  full   | 2495  | No  | NA   | 0  | 0 | Low-quality    | Genome-fragment | 2.19  | 0    |
| S16_extracted_52727      | 1407  | No  | NA   | 0  | 1 | Not-determined | Genome-fragment | NA    | 0    |
| S16_extracted_52779      | 1079  | No  | NA   | 0  | 2 | Not-determined | Genome-fragment | NA    | 0    |
| S16_extracted_52814      | 4230  | No  | NA   | 0  | 3 | Not-determined | Genome-fragment | NA    | 0    |
| S16_extracted_52821      | 1088  | No  | NA   | 0  | 0 | Not-determined | Genome-fragment | NA    | 0    |
| S16_extracted_52882      | 1714  | No  | NA   | 0  | 1 | Not-determined | Genome-fragment | NA    | 0    |
| S16_extracted_52908      | 2730  | No  | NA   | 0  | 2 | Not-determined | Genome-fragment | NA    | 0    |
| S16_extracted_53243      | 8151  | No  | NA   | 0  | 3 | Not-determined | Genome-fragment | NA    | 0    |
| S16_extracted_53274      | 1331  | No  | NA   | 0  | 1 | Not-determined | Genome-fragment | NA    | 0    |
| S16_extracted_53301      | 1993  | No  | NA   | 0  | 0 | Not-determined | Genome-fragment | NA    | 0    |
| S16_extracted_53334      | 1035  | No  | NA   | 0  | 1 | Not-determined | Genome-fragment | NA    | 0    |
| S16_extracted_53366      | 1320  | No  | NA   | 0  | 1 | Not-determined | Genome-fragment | NA    | 0    |
| S16_extracted_53417      | 1176  | No  | NA   | 0  | 1 | Not-determined | Genome-fragment | NA    | 0    |
| S6_vs_k141_7675  full    | 2495  | No  | NA   | 0  | 0 | Low-quality    | Genome-fragment | 6.55  | 0    |
| S16_extracted_53507      | 3234  | No  | NA   | 0  | 1 | Not-determined | Genome-fragment | NA    | 0    |
| S16_extracted_53525      | 1350  | No  | NA   | 0  | 1 | Not-determined | Genome-fragment | NA    | 0    |
| S16_extracted_53537      | 1496  | No  | NA   | 0  | 1 | Not-determined | Genome-fragment | NA    | 0    |
| S13_vs_121819  full      | 2496  | No  | NA   | 0  | 0 | Low-quality    | Genome-fragment | 5.83  | 0    |
| S16_extracted_53541      | 1401  | No  | NA   | 0  | 2 | Not-determined | Genome-fragment | NA    | 0    |
| S16_extracted_53555      | 1016  | No  | NA   | 0  | 0 | Not-determined | Genome-fragment | NA    | 0    |
| S16_extracted_53642      | 2433  | No  | NA   | 0  | 1 | Not-determined | Genome-fragment | NA    | 0    |
| S16_extracted_53673      | 1633  | No  | NA   | 0  | 2 | Not-determined | Genome-fragment | NA    | 0    |
| S16_extracted_53758      | 2090  | No  | NA   | 0  | 0 | Not-determined | Genome-fragment | NA    | 0    |
| S16_extracted_53766      | 1366  | No  | NA   | 0  | 1 | Not-determined | Genome-fragment | NA    | 0    |
| S16_extracted_53961      | 1531  | No  | NA   | 0  | 1 | Not-determined | Genome-fragment | NA    | 0    |
| S5_vs_k141_113123  full  | 2496  | No  | NA   | 0  | 0 | Low-quality    | Genome-fragment | 5.22  | 0    |
| S16_extracted_54052      | 1049  | No  | NA   | 0  | 0 | Not-determined | Genome-fragment | NA    | 0    |
| S16_extracted_54089      | 1629  | No  | NA   | 0  | 2 | Not-determined | Genome-fragment | NA    | 0    |
| S10_vs_22903  full       | 2496  | No  | NA   | 0  | 0 | Low-quality    | Genome-fragment | 3.57  | 0    |
| S16_extracted_54314      | 2272  | No  | NA   | 0  | 2 | Not-determined | Genome-fragment | NA    | 0    |
| S16_extracted_54315      | 1310  | No  | NA   | 0  | 1 | Not-determined | Genome-fragment | NA    | 0    |
| S16_extracted_54329      | 1318  | No  | NA   | 0  | 1 | Not-determined | Genome-fragment | NA    | 0    |
| S16_extracted_54335      | 1070  | No  | NA   | 0  | 1 | Not-determined | Genome-fragment | NA    | 0    |
| S16_extracted_54519      | 4242  | No  | NA   | 0  | 0 | Not-determined | Genome-fragment | NA    | 0    |
| S16_extracted_54711      | 3000  | No  | NA   | 0  | 1 | Not-determined | Genome-fragment | NA    | 0    |
| S8_vs_k141_167463  full  | 2496  | No  | NA   | 0  | 0 | Low-quality    | Genome-fragment | 4.82  | 0    |
| S16_extracted_54864      | 1145  | No  | NA   | 0  | 1 | Not-determined | Genome-fragment | NA    | 0    |
| S16_extracted_54980      | 1664  | No  | NA   | 0  | 1 | Not-determined | Genome-fragment | NA    | 0    |
| S16_extracted_55120      | 1220  | No  | NA   | 0  | 1 | Not-determined | Genome-fragment | NA    | 0    |
| S9_vs_k141_43191  full   | 2497  | No  | NA   | 3  | 0 | Low-quality    | Genome-fragment | 4.1   | 0    |
| S16_extracted_55167      | 1299  | No  | NA   | 0  | 0 | Not-determined | Genome-fragment | NA    | 0    |
| S16_extracted_55263      | 1036  | No  | NA   | 0  | 0 | Not-determined | Genome-fragment | NA    | 0    |
| S16_extracted_55459      | 2088  | No  | NA   | 0  | 3 | Not-determined | Genome-fragment | NA    | 0    |
| S16_extracted_55657      | 8344  | No  | NA   | 0  | 4 | Not-determined | Genome-fragment | NA    | 0    |
| S16_extracted_55696      | 5619  | No  | NA   | 0  | 3 | Not-determined | Genome-fragment | NA    | 0    |
| S16_extracted_55701      | 1076  | No  | NA   | 0  | 1 | Not-determined | Genome-fragment | NA    | 0    |
| S1_extracted_k141_98807  | 2497  | No  | NA   | 1  | 0 | Low-quality    | Genome-fragment | 6.96  | 0    |
| S16_extracted_55752      | 1002  | No  | NA   | 0  | 0 | Not-determined | Genome-fragment | NA    | 0    |
| S16_vs_132040  full      | 2497  | No  | NA   | 0  | 1 | Low-quality    | Genome-fragment | 1.37  | 0    |
| S16_extracted_55988      | 1005  | No  | NA   | 0  | 0 | Not-determined | Genome-fragment | NA    | 0    |
| S16_extracted_55998      | 2987  | No  | NA   | 0  | 1 | Not-determined | Genome-fragment | NA    | 0    |
| S8_vs_k141_54710  full   | 2     |     |      |    |   |                |                 |       |      |



|                           |       |    |    |   |   |                |                 |       |   |
|---------------------------|-------|----|----|---|---|----------------|-----------------|-------|---|
| S8_extracted_k141_20132   | 2499  | No | NA | 0 | 0 | Low-quality    | Genome-fragment | 1.37  | 0 |
| S16_extracted_57723       | 2194  | No | NA | 0 | 0 | Not-determined | Genome-fragment | NA    | 0 |
| S17_vs_k141_117611  full  | 2500  | No | NA | 0 | 0 | Low-quality    | Genome-fragment | 1.41  | 0 |
| S16_extracted_57814       | 3175  | No | NA | 0 | 0 | Not-determined | Genome-fragment | NA    | 0 |
| S16_extracted_58019       | 5304  | No | NA | 0 | 5 | Not-determined | Genome-fragment | NA    | 0 |
| S16_extracted_58237       | 3695  | No | NA | 0 | 2 | Not-determined | Genome-fragment | NA    | 0 |
| S16_extracted_58282       | 1704  | No | NA | 0 | 1 | Not-determined | Genome-fragment | NA    | 0 |
| S16_extracted_58338       | 11177 | No | NA | 0 | 7 | Not-determined | Genome-fragment | NA    | 0 |
| S5_vs_k141_110788  full   | 2500  | No | NA | 0 | 0 | Low-quality    | Genome-fragment | 6.69  | 0 |
| S16_extracted_58551       | 3419  | No | NA | 0 | 1 | Not-determined | Genome-fragment | NA    | 0 |
| S5_vs_k141_10289  full    | 2500  | No | NA | 0 | 1 | Low-quality    | Genome-fragment | 2.66  | 0 |
| S17_extracted_k141_110066 | 2501  | No | NA | 0 | 1 | Low-quality    | Genome-fragment | 2.19  | 0 |
| S13_vs_99806  full        | 2501  | No | NA | 0 | 2 | Low-quality    | Genome-fragment | 1.77  | 0 |
| S16_extracted_58850       | 2046  | No | NA | 0 | 0 | Not-determined | Genome-fragment | NA    | 0 |
| S16_extracted_59493       | 1173  | No | NA | 0 | 1 | Not-determined | Genome-fragment | NA    | 0 |
| S16_extracted_59550       | 1136  | No | NA | 0 | 1 | Not-determined | Genome-fragment | NA    | 0 |
| S16_extracted_59586       | 12076 | No | NA | 0 | 7 | Not-determined | Genome-fragment | NA    | 0 |
| S16_extracted_59680       | 1604  | No | NA | 0 | 0 | Not-determined | Genome-fragment | NA    | 0 |
| S11_vs_k141_93574  full   | 2502  | No | NA | 0 | 0 | Low-quality    | Genome-fragment | 3.93  | 0 |
| S16_extracted_59919       | 1067  | No | NA | 0 | 1 | Not-determined | Genome-fragment | NA    | 0 |
| S16_extracted_60058       | 3388  | No | NA | 0 | 1 | Not-determined | Genome-fragment | NA    | 0 |
| S16_extracted_60070       | 1010  | No | NA | 0 | 1 | Not-determined | Genome-fragment | NA    | 0 |
| S3_vs_k141_36521  full    | 2502  | No | NA | 0 | 3 | Low-quality    | Genome-fragment | 0.69  | 0 |
| S16_extracted_60129       | 1131  | No | NA | 0 | 0 | Not-determined | Genome-fragment | NA    | 0 |
| S7_vs_3473  full          | 2502  | No | NA | 1 | 0 | Low-quality    | Genome-fragment | 5.14  | 0 |
| S7_vs_120037  full        | 2502  | No | NA | 0 | 0 | Low-quality    | Genome-fragment | 4.33  | 0 |
| S16_extracted_60320       | 1070  | No | NA | 0 | 0 | Not-determined | Genome-fragment | NA    | 0 |
| S16_extracted_60481       | 3411  | No | NA | 0 | 2 | Not-determined | Genome-fragment | NA    | 0 |
| S16_extracted_60661       | 3024  | No | NA | 0 | 1 | Not-determined | Genome-fragment | NA    | 0 |
| S13_extracted_129200      | 2503  | No | NA | 0 | 1 | Low-quality    | Genome-fragment | 8.72  | 0 |
| S16_extracted_131878      | 2504  | No | NA | 0 | 1 | Low-quality    | Genome-fragment | 2.26  | 0 |
| S16_extracted_60953       | 3077  | No | NA | 0 | 0 | Not-determined | Genome-fragment | NA    | 0 |
| S16_extracted_60966       | 1229  | No | NA | 0 | 1 | Not-determined | Genome-fragment | NA    | 0 |
| S16_extracted_60973       | 5637  | No | NA | 0 | 7 | Not-determined | Genome-fragment | NA    | 0 |
| S12_vs_k141_19081  full   | 2504  | No | NA | 0 | 2 | Low-quality    | Genome-fragment | 1.52  | 0 |
| S16_extracted_61125       | 1097  | No | NA | 0 | 1 | Not-determined | Genome-fragment | NA    | 0 |
| S16_extracted_61229       | 3331  | No | NA | 0 | 0 | Not-determined | Genome-fragment | NA    | 0 |
| S16_extracted_61309       | 1114  | No | NA | 0 | 0 | Not-determined | Genome-fragment | NA    | 0 |
| S16_extracted_61322       | 4494  | No | NA | 0 | 4 | Not-determined | Genome-fragment | NA    | 0 |
| S16_extracted_61361       | 6305  | No | NA | 0 | 1 | Not-determined | Genome-fragment | NA    | 0 |
| S16_extracted_61478       | 2197  | No | NA | 0 | 1 | Not-determined | Genome-fragment | NA    | 0 |
| S16_extracted_61489       | 1284  | No | NA | 0 | 1 | Not-determined | Genome-fragment | NA    | 0 |
| S16_extracted_61496       | 8783  | No | NA | 0 | 6 | Not-determined | Genome-fragment | NA    | 0 |
| S6_extracted_k141_6194    | 2504  | No | NA | 2 | 0 | Low-quality    | Genome-fragment | 41.03 | 0 |
| S16_extracted_61603       | 1143  | No | NA | 0 | 0 | Not-determined | Genome-fragment | NA    | 0 |
| S9_vs_k141_58202  full    | 2505  | No | NA | 0 | 0 | Low-quality    | Genome-fragment | 6.11  | 0 |
| S16_extracted_61830       | 1044  | No | NA | 0 | 1 | Not-determined | Genome-fragment | NA    | 0 |
| S16_extracted_61947       | 1437  | No | NA | 0 | 0 | Not-determined | Genome-fragment | NA    | 0 |
| S16_extracted_62000       | 1004  | No | NA | 0 | 1 | Not-determined | Genome-fragment | NA    | 0 |
| S16_extracted_62109       | 2660  | No | NA | 0 | 2 | Not-determined | Genome-fragment | NA    | 0 |
| S16_extracted_62203       | 2671  | No | NA | 0 | 6 | Not-determined | Genome-fragment | NA    | 0 |
| S11_vs_k141_50935  full   | 2505  | No | NA | 0 | 0 | Low-quality    | Genome-fragment | 6.84  | 0 |
| S16_extracted_62595       | 1409  | No | NA | 2 | 0 | Not-determined | Genome-fragment | NA    | 0 |
| S16_extracted_62618       | 3580  | No | NA | 0 | 2 | Not-determined | Genome-fragment | NA    | 0 |
| S16_extracted_62672       | 1102  | No | NA | 0 | 1 | Not-determined | Genome-fragment | NA    | 0 |
| S3_extracted_k141_159888  | 2505  | No | NA | 0 | 0 | Low-quality    | Genome-fragment | 3.55  | 0 |
| S16_extracted_62708       | 1071  | No | NA | 0 | 1 | Not-determined | Genome-fragment | NA    | 0 |
| S16_vs_65209  full        | 2505  | No | NA | 1 | 0 | Low-quality    | Genome-fragment | 4.32  | 0 |
| S16_extracted_62835       | 1570  | No | NA | 0 | 1 | Not-determined | Genome-fragment | NA    | 0 |
| S6_vs_k141_44325  full    | 2505  | No | NA | 3 | 0 | Low-quality    | Genome-fragment | 5.12  | 0 |
| S16_extracted_63195       | 2172  | No | NA | 0 | 0 | Not-determined | Genome-fragment | NA    | 0 |
| S16_extracted_63269       | 1158  | No | NA | 0 | 1 | Not-determined | Genome-fragment | NA    | 0 |
| S16_extracted_63336       | 1542  | No | NA | 0 | 0 | Not-determined | Genome-fragment | NA    | 0 |
| S16_extracted_63376       | 1088  | No | NA | 0 | 0 | Not-determined | Genome-fragment | NA    | 0 |
| S17_vs_k141_26133  full   | 2506  | No | NA | 1 | 0 | Low-quality    | Genome-fragment | 8     | 0 |
| S1_vs_k141_28399  full    | 2506  | No | NA | 0 | 2 | Low-quality    | Genome-fragment | 1.12  | 0 |
| S16_extracted_63460       | 1075  | No | NA | 0 | 1 | Not-determined | Genome-fragment | NA    | 0 |
| S16_vs_12730  full        | 2506  | No | NA | 0 | 0 | Low-quality    | Genome-fragment | 4.05  | 0 |
| S16_extracted_63557       | 1030  | No | NA | 0 | 1 | Not-determined | Genome-fragment | NA    | 0 |
| S16_extracted_63599       | 1158  | No | NA | 0 | 1 | Not-determined | Genome-fragment | NA    | 0 |
| S14_vs_k141_12051  full   | 2507  | No | NA | 0 | 2 | Low-quality    | Genome-fragment | 2.41  | 0 |
| S16_extracted_63798       | 1796  | No | NA | 0 | 0 | Not-determined | Genome-fragment | NA    | 0 |
| S16_extracted_63880       | 3024  | No | NA | 0 | 0 | Not-determined | Genome-fragment | NA    | 0 |
| S16_extracted_63968       | 2341  | No | NA | 0 | 6 | Not-determined | Genome-fragment | NA    | 0 |
| S16_extracted_64041       | 1526  | No | NA | 0 | 1 | Not-determined | Genome-fragment | NA    | 0 |
| S16_extracted_64200       | 1034  | No | NA | 0 | 1 | Not-determined | Genome-fragment | NA    | 0 |
| S16_extracted_64341       | 8805  | No | NA | 0 | 2 | Not-determined | Genome-fragment | NA    | 0 |
| S16_extracted_64393       | 3079  | No | NA | 0 | 0 | Not-determined | Genome-fragment | NA    | 0 |
| S16_extracted_64399       | 1669  | No | NA | 0 | 0 | Not-determined | Genome-fragment | NA    | 0 |
| S16_vs_65080  full        | 2507  | No | NA | 0 | 0 | Low-quality    | Genome-fragment | 4.93  | 0 |
| S16_extracted_64566       | 1166  | No | NA | 0 | 0 | Not-determined | Genome-fragment | NA    | 0 |
| S11_vs_k141_51701  full   | 2508  | No | NA | 0 | 0 | Low-quality    | Genome-fragment | 4.24  | 0 |
| S3_vs_k141_7941  full     | 2508  | No | NA | 0 | 0 | Low-quality    | Genome-fragment | 3.16  | 0 |
| S16_extracted_24661       | 2508  | No | NA | 0 | 2 | Low-quality    | Genome-fragment | 0.61  | 0 |
| S16_extracted_64700       | 2204  | No | NA | 0 | 2 | Not-determined | Genome-fragment | NA    | 0 |
| S16_extracted_64725       | 3805  | No | NA | 0 | 2 | Not-determined | Genome-fragment | NA    | 0 |
| S16_extracted_64729       | 1045  | No | NA | 0 | 1 | Not-determined | Genome-fragment | NA    | 0 |
| S16_extracted_64781       | 8516  | No | NA | 0 | 5 | Not-determined | Genome-fragment | NA    | 0 |
| S16_extracted_64815       | 3758  | No | NA | 0 | 2 | Not-determined | Genome-fragment | NA    | 0 |
| S16_vs_56301  full        | 2508  | No | NA | 0 | 1 | Low-quality    | Genome-fragment | 5.35  | 0 |
| S16_extracted_64927       | 2520  | No | NA | 0 | 2 | Not-determined | Genome-fragment | NA    | 0 |
| S10_extracted_50618       | 2508  | No | NA | 0 | 3 | Low-quality    | Genome-fragment | 0.27  | 0 |
| S16_extracted_65059       | 1726  | No | NA | 0 | 2 | Not-determined | Genome-fragment | NA    | 0 |
| S16_extracted_65070       | 7807  | No | NA | 0 | 1 | Not-determined | Genome-fragment | NA    | 0 |
| S16_extracted_65334       | 1244  | No | NA | 0 | 1 | Not-determined | Genome-fragment | NA    | 0 |
| S16_extracted_65364       | 1095  | No | NA | 0 | 1 | Not-determined | Genome-fragment | NA    | 0 |
| S16_extracted_65374       | 2483  | No | NA | 0 | 2 | Not-determined | Genome-fragment | NA    | 0 |
| S16_extracted_65410       | 1536  | No | NA | 0 | 0 | Not-determined | Genome-fragment | NA    | 0 |
| S16_extracted_65523       | 1246  | No | NA | 0 | 0 | Not-determined | Genome-fragment | NA    | 0 |
| S16_extracted_65542       | 1713  | No | NA | 0 | 2 | Not-determined | Genome-fragment | NA    | 0 |
| S16_extracted_65592       | 4483  | No | NA | 0 | 2 | Not-determined | Genome-fragment | NA    | 0 |
| S16_extracted_65596       | 1478  | No | NA | 0 | 1 | Not-determined | Genome-fragment | NA    | 0 |
| S16_extracted_65599       | 3144  | No | NA | 0 | 2 | Not-determined | Genome-fragment | NA    | 0 |
| S16_extracted_65607       | 1900  | No | NA | 0 | 1 | Not-determined | Genome-fragment | NA    | 0 |
| S16_extracted_65805       | 1617  | No | NA | 0 | 1 | Not-determined | Genome-fragment | NA    | 0 |
| S16_extracted_65862       | 2550  | No | NA | 0 | 0 | Not-determined | Genome-fragment | NA    | 0 |
| S16_extracted_65957       | 1660  | No | NA | 0 | 2 | Not-determined | Genome-fragment | NA    | 0 |
| S5_vs_k141_65340  full    | 2509  | No | NA | 0 | 0 | Low-quality    | Genome-fragment | 6.51  | 0 |
| S8_extracted_k141_182078  | 2510  | No | NA | 0 | 4 | Low-quality    | Genome-fragment | 0.68  | 0 |
| S16_extracted_66358       | 1021  | No | NA | 0 | 0 | Not-determined | Genome-fragment | NA    | 0 |
| S11_extracted_k141_99953  | 2511  | No | NA | 3 | 0 | Low-quality    | Genome-fragment | 6.07  | 0 |
| S16_extracted_66516       | 1201  | No | NA | 0 | 0 | Not-determined | Genome-fragment | NA    | 0 |
| S7_extracted_73839        | 2511  | No | NA | 2 | 0 | Low-quality    | Genome-fragment | 5.42  | 0 |
| S16_extracted_66594       | 2829  | No | NA | 0 | 0 | Not-determined | Genome-fragment | NA    | 0 |
| S7_extracted_120015       | 2511  | No | NA | 0 | 0 | Low-quality    | Genome-fragment | 4.81  | 0 |
| S16_extracted_66794       | 1466  | No | NA | 0 | 1 | Not-determined | Genome-fragment | NA    | 0 |
| S16_extracted_66816       | 2802  | No | NA | 0 | 0 | Not-determined | Genome-fragment | NA    | 0 |
| S16_extracted_66829       | 1498  | No | NA | 0 | 0 | Not-determined | Genome-fragment | NA    | 0 |
| S16_vs_152680  full       | 2511  | No | NA | 0 | 0 | Low-quality    | Genome-fragment | 5.92  | 0 |
| S16_extracted_66911       | 1845  | No | NA | 0 | 0 | Not-determined | Genome-fragment | NA    | 0 |
| S16_extracted_66930       | 1079  | No | NA | 0 | 0 | Not-determined | Genome-fragment | NA    | 0 |
| S16_extracted_66944       | 1093  | No | NA | 0 | 0 | Not-determined | Genome-fragment | NA    | 0 |
| S16_extracted_66974       | 2734  | No | NA | 0 | 0 | Not-determined | Genome-fragment | NA    | 0 |
| S16_extracted_67148       | 1023  | No | NA | 0 | 0 | Not-determined | Genome-fragment | NA    | 0 |
| S16_extracted_67214       | 1343  | No | NA | 0 | 1 | Not-determined | Genome-fragment | NA    | 0 |
| S16_extracted_67230       | 2323  | No | NA | 0 | 2 | Not-determined | Genome-fragment | NA    | 0 |
| S16_extracted_67262       | 1060  | No | NA | 0 | 0 | Not-determined | Genome-fragment | NA    | 0 |
| S6_vs_k141_56769  full    | 2511  | No | NA | 0 | 2 | Low-quality    | Genome-fragment | 1.19  | 0 |
| S16_extracted_67373       | 11023 | No | NA | 0 | 0 | Not-determined | Genome-fragment | NA    | 0 |
| S16_extracted_67416       | 1994  | No | NA | 0 | 1 | Not-determined | Genome-fragment | NA    | 0 |
| S16_extracted_67461       | 6025  | No | NA | 0 | 3 | Not-determined | Genome-fragment | NA    | 0 |
| S13_vs_61110  full        | 2513  | No | NA | 2 | 0 | Low-quality    | Genome-fragment | 2.31  | 0 |
| S16_extracted_67706       | 2841  | No | NA | 0 | 1 | Not-determined | Genome-fragment | NA    | 0 |
| S16_extracted_67713       | 9494  | No | NA | 0 | 0 | Not-determined | Genome-fragment | NA    | 0 |
| S16_extracted_67718       | 1116  | No | NA | 0 | 0 | Not-determined | Genome-fragment | NA    | 0 |
| S16_extracted_67840       | 1604  | No | NA | 0 | 0 | Not-determined | Genome-fragment | NA    | 0 |
| S16_extracted_67845       | 1352  | No | NA | 0 | 2 | Not-determined | Genome-fragment | NA    | 0 |
| S5_vs_k141_46221  full    | 2513  | No | NA | 2 | 0 | Low-quality    | Genome-fragment | 2.61  | 0 |
| S16_extracted_67895       | 6149  | No | NA | 0 | 2 | Not-determined | Genome-fragment | NA    | 0 |
| S16_extracted_67909       | 1184  | No | NA | 0 | 1 | Not-determined | Genome-fragment | NA    | 0 |
| S15_extracted_6564        | 2513  | No | NA | 2 | 0 | Low-quality    | Genome-fragment | 1.72  | 0 |
| S16_extracted_67950       | 3109  | No | NA | 0 | 1 | Not-determined | Genome-fragment | NA    | 0 |
| S16_extracted_68139       | 1729  | No | NA | 0 | 0 | Not-determined | Genome-fragment | NA    | 0 |
| S16_extracted_68167       | 5019  | No | NA | 0 | 0 | Not-determined | Genome-fragment | NA    | 0 |
| S8_extracted_k141_21847   | 2513  | No | NA | 0 | 0 | Low-quality    | Genome-fragment | 8.72  | 0 |
| S16_extracted_68301       | 8093  | No | NA | 0 | 4 | Not-determined | Genome-fragment | NA    | 0 |
| S16_extracted_68364       | 1109  | No | NA | 0 | 0 | Not-determined | Genome-fragment | NA    | 0 |
| S16_extracted_68425       | 2409  | No | NA | 0 | 2 | Not-determined | Genome-fragment | NA    | 0 |
| S16_extracted_68460       | 3668  | No | NA | 0 | 3 | Not-determined | Genome-fragment | NA    | 0 |
| S16_extracted_68570       | 1123  | No | NA | 0 | 0 | Not-determined | Genome-fragment | NA    | 0 |
| S7_vs_110215  full        |       |    |    |   |   |                |                 |       |   |



|                           |       |    |    |   |    |                |                 |    |      |
|---------------------------|-------|----|----|---|----|----------------|-----------------|----|------|
| S16_extracted_70612       | 1081  | No | NA | 0 | 1  | Not-determined | Genome-fragment | NA | 0    |
| S16_extracted_70686       | 1720  | No | NA | 0 | 1  | Not-determined | Genome-fragment | NA | 0    |
| S16_extracted_70692       | 9872  | No | NA | 0 | 2  | Not-determined | Genome-fragment | NA | 0    |
| S16_extracted_70784       | 2905  | No | NA | 0 | 2  | Not-determined | Genome-fragment | NA | 0    |
| S16_extracted_70817       | 1045  | No | NA | 0 | 1  | Not-determined | Genome-fragment | NA | 0    |
| S16_extracted_70925       | 1003  | No | NA | 0 | 0  | Not-determined | Genome-fragment | NA | 0    |
| S7_vs_88168  full         | 2516  | No | NA | 3 | 0  | Low-quality    | Genome-fragment | NA | 5.73 |
| S16_extracted_70921       | 1424  | No | NA | 0 | 1  | Not-determined | Genome-fragment | NA | 0    |
| S16_extracted_70969       | 4013  | No | NA | 0 | 1  | Not-determined | Genome-fragment | NA | 0    |
| S16_extracted_71043       | 1383  | No | NA | 0 | 0  | Not-determined | Genome-fragment | NA | 0    |
| S16_vs_76605  full        | 2516  | No | NA | 0 | 0  | Low-quality    | Genome-fragment | NA | 3.33 |
| S8_extracted_k141_43599   | 2516  | No | NA | 0 | 0  | Low-quality    | Genome-fragment | NA | 4.31 |
| S17_vs_k141_95143  full   | 2517  | No | NA | 2 | 0  | Low-quality    | Genome-fragment | NA | 6.34 |
| S16_extracted_71378       | 2524  | No | NA | 0 | 1  | Not-determined | Genome-fragment | NA | 0    |
| S16_extracted_71398       | 2936  | No | NA | 0 | 3  | Not-determined | Genome-fragment | NA | 0    |
| S14_vs_k141_23113  full   | 2517  | No | NA | 0 | 0  | Low-quality    | Genome-fragment | NA | 5.97 |
| S1_extracted_k141_87569   | 2517  | No | NA | 0 | 0  | Low-quality    | Genome-fragment | NA | 4.75 |
| S16_extracted_71665       | 3546  | No | NA | 0 | 1  | Not-determined | Genome-fragment | NA | 0    |
| S16_extracted_71766       | 1551  | No | NA | 0 | 2  | Not-determined | Genome-fragment | NA | 0    |
| S16_extracted_71861       | 1698  | No | NA | 0 | 0  | Not-determined | Genome-fragment | NA | 0    |
| S16_extracted_71893       | 2480  | No | NA | 0 | 2  | Not-determined | Genome-fragment | NA | 0    |
| S16_extracted_71925       | 1358  | No | NA | 0 | 0  | Not-determined | Genome-fragment | NA | 0    |
| S16_extracted_71937       | 4073  | No | NA | 0 | 1  | Not-determined | Genome-fragment | NA | 0    |
| S16_extracted_71943       | 5402  | No | NA | 0 | 3  | Not-determined | Genome-fragment | NA | 0    |
| S5_vs_k141_20980  full    | 2517  | No | NA | 0 | 2  | Low-quality    | Genome-fragment | NA | 3.26 |
| S16_extracted_72121       | 5351  | No | NA | 0 | 4  | Not-determined | Genome-fragment | NA | 0    |
| S16_extracted_72238       | 5190  | No | NA | 0 | 2  | Not-determined | Genome-fragment | NA | 0    |
| S5_vs_k141_50792  full    | 2517  | No | NA | 0 | 1  | Low-quality    | Genome-fragment | NA | 2.9  |
| S16_extracted_72461       | 1225  | No | NA | 0 | 0  | Not-determined | Genome-fragment | NA | 0    |
| S16_extracted_72744       | 1076  | No | NA | 0 | 0  | Not-determined | Genome-fragment | NA | 0    |
| S16_extracted_72771       | 1298  | No | NA | 0 | 0  | Not-determined | Genome-fragment | NA | 0    |
| S7_extracted_130812       | 2517  | No | NA | 0 | 0  | Low-quality    | Genome-fragment | NA | 4.82 |
| S16_extracted_73046       | 3002  | No | NA | 0 | 1  | Not-determined | Genome-fragment | NA | 0    |
| S16_extracted_73209       | 1495  | No | NA | 0 | 1  | Not-determined | Genome-fragment | NA | 0    |
| S16_extracted_73232       | 3657  | No | NA | 0 | 0  | Not-determined | Genome-fragment | NA | 0    |
| S16_extracted_73251       | 1038  | No | NA | 0 | 0  | Not-determined | Genome-fragment | NA | 0    |
| S16_extracted_73264       | 1886  | No | NA | 0 | 0  | Not-determined | Genome-fragment | NA | 0    |
| S10_vs_43839  full        | 2517  | No | NA | 3 | 0  | Low-quality    | Genome-fragment | NA | 6.05 |
| S16_extracted_73307       | 1026  | No | NA | 0 | 0  | Not-determined | Genome-fragment | NA | 0    |
| S16_extracted_73333       | 1431  | No | NA | 0 | 0  | Not-determined | Genome-fragment | NA | 0    |
| S16_extracted_73395       | 1392  | No | NA | 0 | 1  | Not-determined | Genome-fragment | NA | 0    |
| S16_extracted_73526       | 1319  | No | NA | 0 | 0  | Not-determined | Genome-fragment | NA | 0    |
| S16_extracted_73546       | 1076  | No | NA | 0 | 1  | Not-determined | Genome-fragment | NA | 0    |
| S16_extracted_73656       | 1901  | No | NA | 0 | 2  | Not-determined | Genome-fragment | NA | 0    |
| S16_extracted_73743       | 1022  | No | NA | 0 | 1  | Not-determined | Genome-fragment | NA | 0    |
| S6_vs_k141_18338  full    | 2517  | No | NA | 0 | 0  | Low-quality    | Genome-fragment | NA | 5.98 |
| S9_extracted_k141_34931   | 2518  | No | NA | 0 | 3  | Low-quality    | Genome-fragment | NA | 1.64 |
| S11_vs_k141_7628  full    | 2518  | No | NA | 0 | 0  | Low-quality    | Genome-fragment | NA | 4.12 |
| S16_extracted_74045       | 3155  | No | NA | 0 | 1  | Not-determined | Genome-fragment | NA | 0    |
| S16_extracted_74112       | 1113  | No | NA | 0 | 0  | Not-determined | Genome-fragment | NA | 0    |
| S16_extracted_74276       | 1285  | No | NA | 0 | 1  | Not-determined | Genome-fragment | NA | 0    |
| S16_extracted_74243       | 1083  | No | NA | 0 | 1  | Not-determined | Genome-fragment | NA | 0    |
| S16_extracted_74376       | 1831  | No | NA | 0 | 1  | Not-determined | Genome-fragment | NA | 0    |
| S16_extracted_74556       | 5738  | No | NA | 0 | 1  | Not-determined | Genome-fragment | NA | 0    |
| S16_extracted_74579       | 1423  | No | NA | 0 | 0  | Not-determined | Genome-fragment | NA | 0    |
| S16_extracted_74728       | 1085  | No | NA | 0 | 0  | Not-determined | Genome-fragment | NA | 0    |
| S1_vs_k141_52486  full    | 2518  | No | NA | 1 | 0  | Low-quality    | Genome-fragment | NA | 5.54 |
| S16_extracted_74852       | 1756  | No | NA | 0 | 1  | Not-determined | Genome-fragment | NA | 0    |
| S16_extracted_74866       | 5554  | No | NA | 0 | 2  | Not-determined | Genome-fragment | NA | 0    |
| S16_extracted_74904       | 2360  | No | NA | 0 | 0  | Not-determined | Genome-fragment | NA | 0    |
| S16_extracted_74954       | 1068  | No | NA | 0 | 0  | Not-determined | Genome-fragment | NA | 0    |
| S2_vs_k141_18338  full    | 2518  | No | NA | 0 | 0  | Low-quality    | Genome-fragment | NA | 5.66 |
| S7_vs_70269  full         | 2518  | No | NA | 2 | 0  | Low-quality    | Genome-fragment | NA | 6.88 |
| S17_vs_k141_71422  full   | 2519  | No | NA | 0 | 0  | Low-quality    | Genome-fragment | NA | 5.92 |
| S13_vs_127673  full       | 2519  | No | NA | 0 | 0  | Low-quality    | Genome-fragment | NA | 6.37 |
| S16_extracted_75355       | 1271  | No | NA | 0 | 1  | Not-determined | Genome-fragment | NA | 0    |
| S10_vs_110502  full       | 2519  | No | NA | 1 | 0  | Low-quality    | Genome-fragment | NA | 3.13 |
| S16_extracted_75390       | 5604  | No | NA | 0 | 4  | Not-determined | Genome-fragment | NA | 0    |
| S16_extracted_75398       | 1037  | No | NA | 0 | 1  | Not-determined | Genome-fragment | NA | 0    |
| S16_extracted_75438       | 1174  | No | NA | 0 | 0  | Not-determined | Genome-fragment | NA | 0    |
| S16_extracted_75482       | 1117  | No | NA | 0 | 1  | Not-determined | Genome-fragment | NA | 0    |
| S16_extracted_75531       | 5029  | No | NA | 0 | 10 | Not-determined | Genome-fragment | NA | 0    |
| S16_extracted_75591       | 1558  | No | NA | 0 | 0  | Not-determined | Genome-fragment | NA | 0    |
| S8_extracted_k141_179121  | 2519  | No | NA | 0 | 0  | Low-quality    | Genome-fragment | NA | 2.52 |
| S16_extracted_75797       | 3229  | No | NA | 0 | 0  | Not-determined | Genome-fragment | NA | 0    |
| S16_extracted_75806       | 4722  | No | NA | 0 | 3  | Not-determined | Genome-fragment | NA | 0    |
| S16_extracted_75863       | 3420  | No | NA | 0 | 0  | Not-determined | Genome-fragment | NA | 0    |
| S16_extracted_75900       | 1375  | No | NA | 0 | 0  | Not-determined | Genome-fragment | NA | 0    |
| S16_extracted_75956       | 2610  | No | NA | 0 | 3  | Not-determined | Genome-fragment | NA | 0    |
| S16_extracted_76005       | 2678  | No | NA | 0 | 0  | Not-determined | Genome-fragment | NA | 0    |
| S16_extracted_76006       | 3256  | No | NA | 0 | 1  | Not-determined | Genome-fragment | NA | 0    |
| S16_extracted_76089       | 5042  | No | NA | 0 | 1  | Not-determined | Genome-fragment | NA | 0    |
| S16_extracted_76092       | 5031  | No | NA | 0 | 1  | Not-determined | Genome-fragment | NA | 0    |
| S16_extracted_76102       | 8192  | No | NA | 0 | 5  | Not-determined | Genome-fragment | NA | 0    |
| S16_extracted_76112       | 2611  | No | NA | 0 | 2  | Not-determined | Genome-fragment | NA | 0    |
| S16_extracted_76115       | 4641  | No | NA | 0 | 3  | Not-determined | Genome-fragment | NA | 0    |
| S16_extracted_76147       | 1437  | No | NA | 0 | 0  | Not-determined | Genome-fragment | NA | 0    |
| S17_extracted_k141_89425  | 2520  | No | NA | 0 | 0  | Low-quality    | Genome-fragment | NA | 1.46 |
| S16_extracted_76226       | 8575  | No | NA | 0 | 0  | Not-determined | Genome-fragment | NA | 0    |
| S16_extracted_76309       | 1312  | No | NA | 0 | 0  | Not-determined | Genome-fragment | NA | 0    |
| S16_extracted_76824       | 1284  | No | NA | 0 | 1  | Not-determined | Genome-fragment | NA | 0    |
| S16_extracted_76956       | 1210  | No | NA | 0 | 1  | Not-determined | Genome-fragment | NA | 0    |
| S16_extracted_77042       | 5598  | No | NA | 0 | 2  | Not-determined | Genome-fragment | NA | 0    |
| S11_extracted_k141_52276  | 2520  | No | NA | 0 | 0  | Low-quality    | Genome-fragment | NA | 5.99 |
| S16_extracted_77208       | 1146  | No | NA | 0 | 1  | Not-determined | Genome-fragment | NA | 0    |
| S16_extracted_77212       | 1221  | No | NA | 0 | 2  | Not-determined | Genome-fragment | NA | 0    |
| S16_extracted_77267       | 1156  | No | NA | 0 | 1  | Not-determined | Genome-fragment | NA | 0    |
| S16_extracted_77289       | 4482  | No | NA | 0 | 2  | Not-determined | Genome-fragment | NA | 0    |
| S16_extracted_77337       | 3764  | No | NA | 0 | 1  | Not-determined | Genome-fragment | NA | 0    |
| S16_extracted_77362       | 1069  | No | NA | 0 | 0  | Not-determined | Genome-fragment | NA | 0    |
| S16_extracted_77647       | 5507  | No | NA | 0 | 2  | Not-determined | Genome-fragment | NA | 0    |
| S16_extracted_77658       | 1396  | No | NA | 0 | 1  | Not-determined | Genome-fragment | NA | 0    |
| S16_extracted_77661       | 1005  | No | NA | 0 | 1  | Not-determined | Genome-fragment | NA | 0    |
| S3_vs_k141_86201  full    | 2520  | No | NA | 6 | 0  | Low-quality    | Genome-fragment | NA | 7.22 |
| S16_extracted_77778       | 6466  | No | NA | 0 | 4  | Not-determined | Genome-fragment | NA | 0    |
| S16_extracted_77803       | 1489  | No | NA | 0 | 0  | Not-determined | Genome-fragment | NA | 0    |
| S16_extracted_77810       | 1084  | No | NA | 0 | 1  | Not-determined | Genome-fragment | NA | 0    |
| S16_extracted_77840       | 1221  | No | NA | 0 | 1  | Not-determined | Genome-fragment | NA | 0    |
| S7_vs_11647  full         | 2520  | No | NA | 0 | 1  | Low-quality    | Genome-fragment | NA | 4.61 |
| S16_extracted_77867       | 2252  | No | NA | 0 | 2  | Not-determined | Genome-fragment | NA | 0    |
| S16_extracted_77900       | 1512  | No | NA | 0 | 0  | Not-determined | Genome-fragment | NA | 0    |
| S1_vs_k141_17801  full    | 2521  | No | NA | 1 | 0  | Low-quality    | Genome-fragment | NA | 3.39 |
| S16_extracted_77980       | 1277  | No | NA | 0 | 1  | Not-determined | Genome-fragment | NA | 0    |
| S5_vs_k141_49514  full    | 2521  | No | NA | 2 | 0  | Low-quality    | Genome-fragment | NA | 5.81 |
| S16_extracted_78027       | 1694  | No | NA | 0 | 0  | Not-determined | Genome-fragment | NA | 0    |
| S16_extracted_78240       | 1835  | No | NA | 0 | 1  | Not-determined | Genome-fragment | NA | 0    |
| S16_extracted_78250       | 4969  | No | NA | 0 | 2  | Not-determined | Genome-fragment | NA | 0    |
| S16_extracted_78333       | 1104  | No | NA | 0 | 1  | Not-determined | Genome-fragment | NA | 0    |
| S5_vs_k141_11831  full    | 2521  | No | NA | 0 | 0  | Low-quality    | Genome-fragment | NA | 7.97 |
| S16_extracted_78381       | 1324  | No | NA | 0 | 2  | Not-determined | Genome-fragment | NA | 0    |
| S16_extracted_78402       | 1026  | No | NA | 0 | 1  | Not-determined | Genome-fragment | NA | 0    |
| S16_extracted_78520       | 3388  | No | NA | 0 | 1  | Not-determined | Genome-fragment | NA | 0    |
| S16_extracted_78600       | 1229  | No | NA | 0 | 0  | Not-determined | Genome-fragment | NA | 0    |
| S16_extracted_78724       | 1578  | No | NA | 0 | 0  | Not-determined | Genome-fragment | NA | 0    |
| S16_extracted_78848       | 1147  | No | NA | 0 | 1  | Not-determined | Genome-fragment | NA | 0    |
| S16_extracted_78886       | 2898  | No | NA | 0 | 1  | Not-determined | Genome-fragment | NA | 0    |
| S16_extracted_79086       | 3884  | No | NA | 0 | 2  | Not-determined | Genome-fragment | NA | 0    |
| S10_vs_12058  full        | 2521  | No | NA | 0 | 0  | Low-quality    | Genome-fragment | NA | 4.56 |
| S10_vs_32972  full        | 2521  | No | NA | 0 | 1  | Low-quality    | Genome-fragment | NA | 4.71 |
| S16_extracted_79265       | 1002  | No | NA | 0 | 1  | Not-determined | Genome-fragment | NA | 0    |
| S11_vs_k141_53380  full   | 2522  | No | NA | 2 | 0  | Low-quality    | Genome-fragment | NA | 5.85 |
| S3_vs_k141_17684  full    | 2522  | No | NA | 1 | 0  | Low-quality    | Genome-fragment | NA | 1.49 |
| S16_extracted_79426       | 3374  | No | NA | 0 | 1  | Not-determined | Genome-fragment | NA | 0    |
| S16_extracted_79498       | 1535  | No | NA | 0 | 0  | Not-determined | Genome-fragment | NA | 0    |
| S16_vs_7730  HiSeq        | 2522  | No | NA | 0 | 0  | Low-quality    | Genome-fragment | NA | 5.61 |
| S12_extracted_k141_33652  | 2522  | No | NA | 0 | 0  | Low-quality    | Genome-fragment | NA | 3.99 |
| S16_extracted_79618       | 6437  | No | NA | 0 | 3  | Not-determined | Genome-fragment | NA | 0    |
| S16_extracted_79724       | 20132 | No | NA | 0 | 4  | Not-determined | Genome-fragment | NA | 0    |
| S8_vs_k141_182797  full   | 2522  | No | NA | 1 | 0  | Low-quality    | Genome-fragment | NA | 2.36 |
| S17_extracted_k141_145248 | 2523  | No | NA | 0 | 0  | Low-quality    | Genome-fragment | NA | 4.05 |
| S9_vs_k141_60351  full    | 2523  | No | NA | 0 | 0  | Low-quality    | Genome-fragment | NA | 6.06 |
| S5_vs_k141_79164  full    | 2523  | No | NA | 3 | 0  | Low-quality    | Genome-fragment | NA | 1.68 |
| S5_vs_k141_110456  full   | 2523  | No | NA | 2 | 0  | Low-quality    | Genome-fragment | NA | 5.62 |
| S16_extracted_80353       | 20856 | No | NA | 0 | 6  | Not-determined | Genome-fragment | NA | 0    |
| S16_extracted_80385       | 5421  | No | NA | 0 | 2  | Not-determined | Genome-fragment | NA | 0    |
| S16_extracted_80394       | 1326  | No | NA | 0 | 1  | Not-determined | Genome-fragment | NA | 0    |
| S16_extracted_80466       | 5800  | No | NA | 0 | 3  | Not-determined | Genome-fragment | NA | 0    |
| S16_extracted_80484       | 3443  | No | NA | 0 | 1  | Not-determined | Genome-fragment | NA | 0    |
| S8_extracted_k141_50703   | 2523  | No | NA | 1 | 0  | Low-quality    | Genome-fragment | NA | 2.51 |
| S9_vs_k141_50124  full    | 2524  | No | NA | 3 | 0  | Low-quality    | Genome-fragment | NA | 4.2  |



|                           |       |    |    |    |   |                |                 |       |   |
|---------------------------|-------|----|----|----|---|----------------|-----------------|-------|---|
| S5_extracted_k141_94026   | 2525  | No | NA | 1  | 0 | Low-quality    | Genome-fragment | 2.2   | 0 |
| S16_extracted_82219       | 2043  | No | NA | 0  | 0 | Not-determined | Genome-fragment | NA    | 0 |
| S16_extracted_82245       | 2616  | No | NA | 0  | 0 | Not-determined | Genome-fragment | NA    | 0 |
| S16_extracted_82246       | 1365  | No | NA | 0  | 0 | Not-determined | Genome-fragment | NA    | 0 |
| S16_extracted_82308       | 3767  | No | NA | 0  | 3 | Not-determined | Genome-fragment | NA    | 0 |
| S16_extracted_82379       | 1038  | No | NA | 0  | 1 | Not-determined | Genome-fragment | NA    | 0 |
| S16_vs_59561[full]        | 2525  | No | NA | 3  | 0 | Low-quality    | Genome-fragment | 7.04  | 0 |
| S16_extracted_82473       | 1096  | No | NA | 0  | 0 | Not-determined | Genome-fragment | NA    | 0 |
| S16_extracted_82493       | 2514  | No | NA | 0  | 0 | Not-determined | Genome-fragment | NA    | 0 |
| S16_extracted_82496       | 1131  | No | NA | 0  | 1 | Not-determined | Genome-fragment | NA    | 0 |
| S16_extracted_82629       | 1177  | No | NA | 0  | 0 | Not-determined | Genome-fragment | NA    | 0 |
| S16_vs_41294[full]        | 2525  | No | NA | 3  | 0 | Low-quality    | Genome-fragment | 7.11  | 0 |
| S16_extracted_82657       | 4844  | No | NA | 0  | 2 | Not-determined | Genome-fragment | NA    | 0 |
| S16_extracted_82700       | 1087  | No | NA | 0  | 1 | Not-determined | Genome-fragment | NA    | 0 |
| S16_extracted_82833       | 5708  | No | NA | 0  | 2 | Not-determined | Genome-fragment | NA    | 0 |
| S16_extracted_82879       | 4069  | No | NA | 0  | 2 | Not-determined | Genome-fragment | NA    | 0 |
| S16_extracted_82933       | 1244  | No | NA | 0  | 1 | Not-determined | Genome-fragment | NA    | 0 |
| S16_extracted_82990       | 4602  | No | NA | 0  | 0 | Not-determined | Genome-fragment | NA    | 0 |
| S16_extracted_83006       | 1002  | No | NA | 0  | 1 | Not-determined | Genome-fragment | NA    | 0 |
| S16_extracted_83118       | 2176  | No | NA | 0  | 0 | Not-determined | Genome-fragment | NA    | 0 |
| S16_extracted_83222       | 1807  | No | NA | 0  | 1 | Not-determined | Genome-fragment | NA    | 0 |
| S16_extracted_83422       | 1032  | No | NA | 0  | 1 | Not-determined | Genome-fragment | NA    | 0 |
| S16_extracted_83489       | 2285  | No | NA | 0  | 3 | Not-determined | Genome-fragment | NA    | 0 |
| S16_extracted_83521       | 2198  | No | NA | 0  | 1 | Not-determined | Genome-fragment | NA    | 0 |
| S16_extracted_83525       | 1219  | No | NA | 0  | 0 | Not-determined | Genome-fragment | NA    | 0 |
| S16_extracted_83535       | 1114  | No | NA | 0  | 0 | Not-determined | Genome-fragment | NA    | 0 |
| S16_extracted_83669       | 5265  | No | NA | 0  | 1 | Not-determined | Genome-fragment | NA    | 0 |
| S16_extracted_83761       | 1019  | No | NA | 0  | 1 | Not-determined | Genome-fragment | NA    | 0 |
| S16_extracted_83769       | 1251  | No | NA | 0  | 1 | Not-determined | Genome-fragment | NA    | 0 |
| S4_extracted_14118        | 2525  | No | NA | 2  | 0 | Low-quality    | Genome-fragment | 8.32  | 0 |
| S16_extracted_83918       | 1974  | No | NA | 0  | 0 | Not-determined | Genome-fragment | NA    | 0 |
| S16_extracted_83949       | 20838 | No | NA | 0  | 5 | Not-determined | Genome-fragment | NA    | 0 |
| S8_extracted_k141_109251  | 2525  | No | NA | 1  | 0 | Low-quality    | Genome-fragment | 4.73  | 0 |
| S11_vs_k141_69981[full]   | 2526  | No | NA | 1  | 0 | Low-quality    | Genome-fragment | 5.83  | 0 |
| S16_extracted_84001       | 7608  | No | NA | 0  | 1 | Not-determined | Genome-fragment | NA    | 0 |
| S16_extracted_84175       | 1049  | No | NA | 0  | 0 | Not-determined | Genome-fragment | NA    | 0 |
| S16_extracted_84283       | 3851  | No | NA | 0  | 4 | Not-determined | Genome-fragment | NA    | 0 |
| S16_extracted_84375       | 1260  | No | NA | 0  | 0 | Not-determined | Genome-fragment | NA    | 0 |
| S16_extracted_84432       | 1005  | No | NA | 0  | 1 | Not-determined | Genome-fragment | NA    | 0 |
| S16_extracted_84457       | 9275  | No | NA | 0  | 3 | Not-determined | Genome-fragment | NA    | 0 |
| S16_extracted_84462       | 54255 | No | NA | 21 | 1 | Complete       | High-quality    | 100   | 0 |
| S11_vs_k141_796301[full]  | 2527  | No | NA | 6  | 0 | Low-quality    | Genome-fragment | 6.52  | 0 |
| S16_extracted_84499       | 2116  | No | NA | 0  | 0 | Not-determined | Genome-fragment | NA    | 0 |
| S16_extracted_84507       | 1149  | No | NA | 0  | 2 | Not-determined | Genome-fragment | NA    | 0 |
| S16_extracted_84522       | 1312  | No | NA | 0  | 1 | Not-determined | Genome-fragment | NA    | 0 |
| S13_vs_55591[full]        | 2527  | No | NA | 0  | 3 | Low-quality    | Genome-fragment | 3.07  | 0 |
| S16_extracted_84662       | 4166  | No | NA | 0  | 3 | Not-determined | Genome-fragment | NA    | 0 |
| S16_extracted_84708       | 1461  | No | NA | 0  | 1 | Not-determined | Genome-fragment | NA    | 0 |
| S16_extracted_84734       | 1004  | No | NA | 0  | 0 | Not-determined | Genome-fragment | NA    | 0 |
| S16_extracted_84896       | 3217  | No | NA | 0  | 2 | Not-determined | Genome-fragment | NA    | 0 |
| S5_vs_k141_47799[full]    | 2527  | No | NA | 1  | 0 | Low-quality    | Genome-fragment | 7.03  | 0 |
| S16_extracted_84916       | 2272  | No | NA | 0  | 2 | Not-determined | Genome-fragment | NA    | 0 |
| S16_extracted_84994       | 8283  | No | NA | 0  | 3 | Not-determined | Genome-fragment | NA    | 0 |
| S16_extracted_85061       | 2178  | No | NA | 0  | 0 | Not-determined | Genome-fragment | NA    | 0 |
| S16_vs_561146[full]       | 2527  | No | NA | 0  | 0 | Low-quality    | Genome-fragment | 6.17  | 0 |
| S16_extracted_85244       | 1598  | No | NA | 0  | 0 | Not-determined | Genome-fragment | NA    | 0 |
| S16_vs_41164[full]        | 2528  | No | NA | 0  | 3 | Low-quality    | Genome-fragment | 1.13  | 0 |
| S16_extracted_85428       | 1990  | No | NA | 0  | 1 | Not-determined | Genome-fragment | NA    | 0 |
| S16_extracted_85573       | 2079  | No | NA | 0  | 1 | Not-determined | Genome-fragment | NA    | 0 |
| S16_extracted_85579       | 4014  | No | NA | 0  | 2 | Not-determined | Genome-fragment | NA    | 0 |
| S16_extracted_85631       | 3147  | No | NA | 0  | 2 | Not-determined | Genome-fragment | NA    | 0 |
| S16_extracted_85738       | 2019  | No | NA | 0  | 1 | Not-determined | Genome-fragment | NA    | 0 |
| S16_extracted_85748       | 3503  | No | NA | 0  | 1 | Not-determined | Genome-fragment | NA    | 0 |
| S16_extracted_85771       | 1004  | No | NA | 0  | 1 | Not-determined | Genome-fragment | NA    | 0 |
| S12_vs_k141_125739[full]  | 2528  | No | NA | 0  | 1 | Low-quality    | Genome-fragment | 4.16  | 0 |
| S16_extracted_85854       | 5631  | No | NA | 0  | 1 | Not-determined | Genome-fragment | NA    | 0 |
| S16_extracted_85857       | 9130  | No | NA | 0  | 1 | Not-determined | Genome-fragment | NA    | 0 |
| S16_extracted_85892       | 1056  | No | NA | 0  | 1 | Not-determined | Genome-fragment | NA    | 0 |
| S16_extracted_85935       | 2641  | No | NA | 0  | 0 | Not-determined | Genome-fragment | NA    | 0 |
| S13_vs_95629[full]        | 2529  | No | NA | 1  | 0 | Low-quality    | Genome-fragment | 3.88  | 0 |
| S1_vs_k141_117848[full]   | 2529  | No | NA | 0  | 0 | Low-quality    | Genome-fragment | 6.42  | 0 |
| S16_vs_157694[full]       | 2529  | No | NA | 0  | 0 | Low-quality    | Genome-fragment | 5.4   | 0 |
| S16_extracted_86083       | 6769  | No | NA | 0  | 6 | Not-determined | Genome-fragment | NA    | 0 |
| S16_extracted_86128       | 1014  | No | NA | 0  | 1 | Not-determined | Genome-fragment | NA    | 0 |
| S16_extracted_86129       | 1310  | No | NA | 0  | 2 | Not-determined | Genome-fragment | NA    | 0 |
| S16_extracted_86227       | 4325  | No | NA | 0  | 5 | Not-determined | Genome-fragment | NA    | 0 |
| S2_vs_k141_2979[full]     | 2530  | No | NA | 0  | 1 | Low-quality    | Genome-fragment | 0.95  | 0 |
| S16_extracted_86367       | 1018  | No | NA | 0  | 1 | Not-determined | Genome-fragment | NA    | 0 |
| S16_extracted_86474       | 3214  | No | NA | 0  | 2 | Not-determined | Genome-fragment | NA    | 0 |
| S16_extracted_86510       | 1065  | No | NA | 0  | 0 | Not-determined | Genome-fragment | NA    | 0 |
| S16_extracted_86515       | 4735  | No | NA | 0  | 2 | Not-determined | Genome-fragment | NA    | 0 |
| S16_extracted_86592       | 3465  | No | NA | 0  | 2 | Not-determined | Genome-fragment | NA    | 0 |
| S16_extracted_86702       | 1567  | No | NA | 0  | 1 | Not-determined | Genome-fragment | NA    | 0 |
| S16_extracted_86730       | 2052  | No | NA | 0  | 2 | Not-determined | Genome-fragment | NA    | 0 |
| S16_extracted_86797       | 1315  | No | NA | 0  | 1 | Not-determined | Genome-fragment | NA    | 0 |
| S4_extracted_19526        | 2530  | No | NA | 3  | 0 | Low-quality    | Genome-fragment | 2.46  | 0 |
| S17_extracted_k141_141346 | 2531  | No | NA | 0  | 0 | Low-quality    | Genome-fragment | 3.81  | 0 |
| S8_extracted_k141_113479  | 2531  | No | NA | 4  | 0 | Low-quality    | Genome-fragment | 11.55 | 0 |
| S16_extracted_87141       | 1250  | No | NA | 0  | 0 | Not-determined | Genome-fragment | NA    | 0 |
| S16_extracted_87190       | 67710 | No | NA | 10 | 1 | Medium-quality | Genome-fragment | 63.7  | 0 |
| S16_extracted_87220       | 9470  | No | NA | 0  | 5 | Not-determined | Genome-fragment | NA    | 0 |
| S16_extracted_87321       | 1014  | No | NA | 0  | 0 | Not-determined | Genome-fragment | NA    | 0 |
| S16_extracted_87325       | 6330  | No | NA | 0  | 7 | Not-determined | Genome-fragment | NA    | 0 |
| S16_extracted_87477       | 1291  | No | NA | 0  | 0 | Not-determined | Genome-fragment | NA    | 0 |
| S16_extracted_87534       | 8840  | No | NA | 0  | 3 | Not-determined | Genome-fragment | NA    | 0 |
| S16_extracted_87580       | 1138  | No | NA | 0  | 1 | Not-determined | Genome-fragment | NA    | 0 |
| S7_vs_47899[full]         | 2531  | No | NA | 2  | 0 | Low-quality    | Genome-fragment | 6.16  | 0 |
| S16_extracted_87754       | 3682  | No | NA | 0  | 1 | Not-determined | Genome-fragment | NA    | 0 |
| S8_extracted_k141_31565   | 2531  | No | NA | 0  | 2 | Low-quality    | Genome-fragment | 2.26  | 0 |
| S16_extracted_88090       | 1880  | No | NA | 0  | 0 | Not-determined | Genome-fragment | NA    | 0 |
| S16_extracted_88214       | 2263  | No | NA | 0  | 1 | Not-determined | Genome-fragment | NA    | 0 |
| S16_extracted_88262       | 2174  | No | NA | 0  | 1 | Not-determined | Genome-fragment | NA    | 0 |
| S16_extracted_88263       | 2402  | No | NA | 0  | 0 | Not-determined | Genome-fragment | NA    | 0 |
| S16_extracted_88303       | 1048  | No | NA | 0  | 1 | Not-determined | Genome-fragment | NA    | 0 |
| S16_extracted_88337       | 4147  | No | NA | 0  | 1 | Not-determined | Genome-fragment | NA    | 0 |
| S17_extracted_k141_90022  | 2532  | No | NA | 1  | 0 | Low-quality    | Genome-fragment | 5.74  | 0 |
| S14_vs_k141_99812[full]   | 2532  | No | NA | 0  | 1 | Low-quality    | Genome-fragment | 1.22  | 0 |
| S16_extracted_88494       | 1080  | No | NA | 0  | 1 | Not-determined | Genome-fragment | NA    | 0 |
| S16_extracted_88528       | 3152  | No | NA | 0  | 3 | Not-determined | Genome-fragment | NA    | 0 |
| S16_extracted_88616       | 8974  | No | NA | 0  | 4 | Not-determined | Genome-fragment | NA    | 0 |
| S16_extracted_88678       | 5128  | No | NA | 0  | 1 | Not-determined | Genome-fragment | NA    | 0 |
| S16_extracted_88721       | 1273  | No | NA | 0  | 1 | Not-determined | Genome-fragment | NA    | 0 |
| S16_extracted_88751       | 6020  | No | NA | 0  | 3 | Not-determined | Genome-fragment | NA    | 0 |
| S16_extracted_88853       | 1142  | No | NA | 0  | 3 | Not-determined | Genome-fragment | NA    | 0 |
| S16_extracted_89014       | 1093  | No | NA | 0  | 1 | Not-determined | Genome-fragment | NA    | 0 |
| S1_vs_k141_125413[full]   | 2532  | No | NA | 3  | 0 | Low-quality    | Genome-fragment | 4.64  | 0 |
| S7_extracted_77425        | 2532  | No | NA | 2  | 0 | Low-quality    | Genome-fragment | 9.41  | 0 |
| S16_vs_155956[full]       | 2532  | No | NA | 0  | 0 | Low-quality    | Genome-fragment | 1.47  | 0 |
| S16_extracted_89386       | 1364  | No | NA | 0  | 1 | Not-determined | Genome-fragment | NA    | 0 |
| S16_extracted_89405       | 5252  | No | NA | 0  | 3 | Not-determined | Genome-fragment | NA    | 0 |
| S16_extracted_89450       | 6211  | No | NA | 0  | 5 | Not-determined | Genome-fragment | NA    | 0 |
| S4_extracted_77514        | 2532  | No | NA | 5  | 0 | Low-quality    | Genome-fragment | 8.35  | 0 |
| S11_vs_k141_89517[full]   | 2533  | No | NA | 2  | 0 | Low-quality    | Genome-fragment | 5.98  | 0 |
| S16_extracted_89674       | 1114  | No | NA | 0  | 0 | Not-determined | Genome-fragment | NA    | 0 |
| S16_extracted_89702       | 1288  | No | NA | 0  | 2 | Not-determined | Genome-fragment | NA    | 0 |
| S14_extracted_k141_104113 | 2534  | No | NA | 0  | 1 | Low-quality    | Genome-fragment | 6.01  | 0 |
| S16_extracted_89902       | 2407  | No | NA | 0  | 2 | Not-determined | Genome-fragment | NA    | 0 |
| S16_extracted_90014       | 1099  | No | NA | 0  | 0 | Not-determined | Genome-fragment | NA    | 0 |
| S16_extracted_90043       | 2959  | No | NA | 0  | 2 | Not-determined | Genome-fragment | NA    | 0 |
| S16_extracted_90137       | 1684  | No | NA | 0  | 2 | Not-determined | Genome-fragment | NA    | 0 |
| S16_extracted_90183       | 2447  | No | NA | 0  | 0 | Not-determined | Genome-fragment | NA    | 0 |
| S1_vs_k141_106451[full]   | 2534  | No | NA | 0  | 0 | Low-quality    | Genome-fragment | 5.34  | 0 |
| S16_extracted_90202       | 1029  | No | NA | 0  | 2 | Not-determined | Genome-fragment | NA    | 0 |
| S16_extracted_90208       | 2529  | No | NA | 0  | 2 | Not-determined | Genome-fragment | NA    | 0 |
| S16_extracted_90328       | 26593 | No | NA | 17 | 0 | Medium-quality | Genome-fragment | 71.71 | 0 |
| S16_extracted_90352       | 1453  | No | NA | 0  | 2 | Not-determined | Genome-fragment | NA    | 0 |
| S16_extracted_90380       | 4560  | No | NA | 0  | 2 | Not-determined | Genome-fragment | NA    | 0 |
| S16_vs_782841[102gene]    | 2534  | No | NA | 1  | 0 | Low-quality    | Genome-fragment | 4.14  | 0 |
| S16_extracted_90407       | 1005  | No | NA | 0  | 0 | Not-determined | Genome-fragment | NA    | 0 |
| S16_extracted_90470       | 3715  | No | NA | 0  | 0 | Not-determined | Genome-fragment | NA    | 0 |
| S16_extracted_90493       | 3590  | No | NA | 0  | 4 | Not-determined | Genome-fragment | NA    | 0 |
| S15_vs_65802[full]        | 2534  | No | NA | 0  | 1 | Low-quality    | Genome-fragment | 2.04  | 0 |
| S3_vs_k141_69498[full]    | 2535  | No | NA | 0  | 0 | Low-quality    | Genome-fragment | 5.07  | 0 |
| S8_vs_k141_118399[full]   | 2535  | No | NA | 0  | 0 | Low-quality    | Genome-fragment | 1.46  | 0 |
| S9_vs_k141_369031[full]   | 2536  | No | NA | 0  | 0 | Low-quality    | Genome-fragment | 1.47  | 0 |
| S11_vs_k141_13340[full]   | 2536  | No | NA | 3  | 0 | Low-quality    | Genome-fragment | 6.41  | 0 |
| S16_extracted_90781       | 2000  | No | NA | 0  | 2 | Not-determined | Genome-fragment | NA    | 0 |
| S16_extracted_90850       | 4154  | No | NA | 0  | 3 | Not-determined | Genome-fragment | NA    | 0 |
| S16_extracted_90859       | 1057  | No | NA | 0  | 1 | Not-determined | Genome-fragment | NA    | 0 |
| S16_extracted_91307       | 3267  | No | NA | 0  | 3 | Not-determined | Genome-fragment | NA    | 0 |
| S16_extracted_91310</     |       |    |    |    |   |                |                 |       |   |



|                           |       |     |     |    |    |                |                 |       |   |
|---------------------------|-------|-----|-----|----|----|----------------|-----------------|-------|---|
| S16_extracted_92414       | 1578  | No  | NA  | 0  | 1  | Not-determined | Genome-fragment | NA    | 0 |
| S16_extracted_92537       | 1076  | No  | NA  | 0  | 0  | Not-determined | Genome-fragment | NA    | 0 |
| S16_extracted_92560       | 1105  | No  | NA  | 0  | 1  | Not-determined | Genome-fragment | NA    | 0 |
| S7_extracted_119425       | 2539  | No  | NA  | 0  | 3  | Low-quality    | Genome-fragment | 1.67  | 0 |
| S16_extracted_92827       | 3472  | No  | NA  | 0  | 1  | Not-determined | Genome-fragment | NA    | 0 |
| S16_extracted_92853       | 1478  | No  | NA  | 0  | 0  | Not-determined | Genome-fragment | NA    | 0 |
| S16_extracted_92952       | 1103  | No  | NA  | 0  | 1  | Not-determined | Genome-fragment | NA    | 0 |
| S16_extracted_92975       | 5738  | No  | NA  | 0  | 3  | Not-determined | Genome-fragment | NA    | 0 |
| S7_vs_1080101[full]       | 2539  | No  | NA  | 0  | 0  | Low-quality    | Genome-fragment | 5.02  | 0 |
| S1_vs_k141_156922[full]   | 2540  | No  | NA  | 1  | 0  | Low-quality    | Genome-fragment | 9.34  | 0 |
| S16_extracted_93073       | 1057  | No  | NA  | 0  | 0  | Not-determined | Genome-fragment | NA    | 0 |
| S16_extracted_93103       | 5541  | No  | NA  | 0  | 2  | Not-determined | Genome-fragment | NA    | 0 |
| S16_extracted_93143       | 1112  | No  | NA  | 0  | 0  | Not-determined | Genome-fragment | NA    | 0 |
| S16_extracted_93266       | 1221  | No  | NA  | 0  | 4  | Not-determined | Genome-fragment | NA    | 0 |
| S5_extracted_k141_75706   | 2540  | No  | NA  | 2  | 0  | Low-quality    | Genome-fragment | 8.43  | 0 |
| S16_extracted_93414       | 1008  | No  | NA  | 0  | 0  | Not-determined | Genome-fragment | NA    | 0 |
| S16_extracted_93513       | 1396  | No  | NA  | 0  | 1  | Not-determined | Genome-fragment | NA    | 0 |
| S16_extracted_93678       | 1950  | No  | NA  | 0  | 0  | Not-determined | Genome-fragment | NA    | 0 |
| S5_vs_k141_95129[full]    | 2540  | No  | NA  | 0  | 1  | Low-quality    | Genome-fragment | 4.77  | 0 |
| S16_extracted_93803       | 4534  | No  | NA  | 0  | 1  | Not-determined | Genome-fragment | NA    | 0 |
| S16_extracted_93877       | 2395  | No  | NA  | 0  | 2  | Not-determined | Genome-fragment | NA    | 0 |
| S16_extracted_93954       | 5158  | No  | NA  | 0  | 2  | Not-determined | Genome-fragment | NA    | 0 |
| S16_extracted_94034       | 4830  | No  | NA  | 0  | 4  | Not-determined | Genome-fragment | NA    | 0 |
| S16_vs_145295[full]       | 2540  | No  | NA  | 0  | 0  | Low-quality    | Genome-fragment | 5.04  | 0 |
| S16_vs_159413[full]       | 2540  | No  | NA  | 0  | 2  | Low-quality    | Genome-fragment | 1.33  | 0 |
| S16_extracted_94212       | 4994  | No  | NA  | 0  | 0  | Not-determined | Genome-fragment | NA    | 0 |
| S16_extracted_94267       | 1106  | No  | NA  | 0  | 0  | Not-determined | Genome-fragment | NA    | 0 |
| S12_vs_k141_105548[full]  | 2540  | No  | NA  | 0  | 1  | Low-quality    | Genome-fragment | 2.06  | 0 |
| S16_extracted_94291       | 1049  | No  | NA  | 0  | 0  | Not-determined | Genome-fragment | NA    | 0 |
| S16_extracted_94352       | 2174  | No  | NA  | 0  | 1  | Not-determined | Genome-fragment | NA    | 0 |
| S17_extracted_k141_113104 | 2541  | No  | NA  | 1  | 0  | Low-quality    | Genome-fragment | 4.52  | 0 |
| S16_extracted_94539       | 1330  | No  | NA  | 1  | 1  | Not-determined | Genome-fragment | NA    | 0 |
| S16_extracted_94615       | 1047  | No  | NA  | 0  | 1  | Not-determined | Genome-fragment | NA    | 0 |
| S16_extracted_94684       | 1079  | No  | NA  | 0  | 1  | Not-determined | Genome-fragment | NA    | 0 |
| S16_extracted_94695       | 3014  | No  | NA  | 1  | 0  | Not-determined | Genome-fragment | NA    | 0 |
| S16_extracted_94710       | 1045  | No  | NA  | 0  | 1  | Not-determined | Genome-fragment | NA    | 0 |
| S17_vs_k141_122758[full]  | 2541  | No  | NA  | 0  | 2  | Low-quality    | Genome-fragment | 2.84  | 0 |
| S16_extracted_94866       | 16805 | No  | NA  | 7  | 0  | Medium-quality | Genome-fragment | 76.85 | 0 |
| S16_extracted_94883       | 1071  | No  | NA  | 0  | 0  | Not-determined | Genome-fragment | NA    | 0 |
| S11_vs_k141_26714[full]   | 2541  | No  | NA  | 2  | 0  | Low-quality    | Genome-fragment | 4.55  | 0 |
| S16_extracted_94989       | 1340  | No  | NA  | 0  | 1  | Not-determined | Genome-fragment | NA    | 0 |
| S5_vs_k141_1990[full]     | 2541  | No  | NA  | 0  | 0  | Low-quality    | Genome-fragment | 4.79  | 0 |
| S8_vs_k141_103010[full]   | 2541  | No  | NA  | 0  | 0  | Low-quality    | Genome-fragment | 4.5   | 0 |
| S16_extracted_95344       | 1314  | No  | NA  | 0  | 0  | Not-determined | Genome-fragment | NA    | 0 |
| S13_extracted_92492       | 2542  | No  | NA  | 0  | 0  | Low-quality    | Genome-fragment | 1.56  | 0 |
| S1_vs_k141_111690[full]   | 2542  | No  | NA  | 0  | 2  | Low-quality    | Genome-fragment | 2.09  | 0 |
| S16_extracted_95628       | 1524  | No  | NA  | 0  | 1  | Not-determined | Genome-fragment | NA    | 0 |
| S16_extracted_95661       | 3111  | No  | NA  | 0  | 1  | Not-determined | Genome-fragment | NA    | 0 |
| S16_extracted_95677       | 1326  | No  | NA  | 0  | 0  | Not-determined | Genome-fragment | NA    | 0 |
| S16_extracted_95679       | 3014  | No  | NA  | 0  | 1  | Not-determined | Genome-fragment | NA    | 0 |
| S16_extracted_95848       | 1180  | No  | NA  | 0  | 1  | Not-determined | Genome-fragment | NA    | 0 |
| S16_extracted_95923       | 1040  | No  | NA  | 0  | 0  | Not-determined | Genome-fragment | NA    | 0 |
| S16_extracted_95942       | 1109  | No  | NA  | 0  | 0  | Not-determined | Genome-fragment | NA    | 0 |
| S16_extracted_96049       | 1114  | No  | NA  | 0  | 1  | Not-determined | Genome-fragment | NA    | 0 |
| S16_extracted_96056       | 2649  | No  | NA  | 0  | 0  | Not-determined | Genome-fragment | NA    | 0 |
| S16_extracted_96073       | 1043  | No  | NA  | 0  | 0  | Not-determined | Genome-fragment | NA    | 0 |
| S16_extracted_96102       | 1120  | No  | NA  | 0  | 1  | Not-determined | Genome-fragment | NA    | 0 |
| S2_vs_k141_44006[full]    | 2542  | No  | NA  | 0  | 0  | Low-quality    | Genome-fragment | 4.53  | 0 |
| S12_vs_k141_82275[full]   | 2542  | No  | NA  | 0  | 1  | Low-quality    | Genome-fragment | 3.69  | 0 |
| S14_vs_k141_102337[full]  | 2543  | No  | NA  | 1  | 0  | Low-quality    | Genome-fragment | 17.12 | 0 |
| S16_extracted_96344       | 1115  | No  | NA  | 0  | 0  | Not-determined | Genome-fragment | NA    | 0 |
| S16_extracted_96370       | 2768  | No  | NA  | 0  | 1  | Not-determined | Genome-fragment | NA    | 0 |
| S16_vs_27812[full]        | 2543  | No  | NA  | 2  | 0  | Low-quality    | Genome-fragment | 7.9   | 0 |
| S16_extracted_96483       | 52402 | No  | NA  | 12 | 3  | Medium-quality | Genome-fragment | 66.24 | 0 |
| S8_vs_k141_13988[full]    | 2543  | No  | NA  | 0  | 0  | Low-quality    | Genome-fragment | 4.47  | 0 |
| S16_extracted_96564       | 1378  | No  | NA  | 0  | 2  | Not-determined | Genome-fragment | NA    | 0 |
| S16_extracted_96620       | 1201  | No  | NA  | 0  | 0  | Not-determined | Genome-fragment | NA    | 0 |
| S16_extracted_96763       | 1154  | No  | NA  | 0  | 0  | Not-determined | Genome-fragment | NA    | 0 |
| S16_extracted_96838       | 1488  | Yes | 820 | 1  | 1  | Not-determined | Genome-fragment | 44.89 | 0 |
| S16_extracted_96910       | 4007  | No  | NA  | 0  | 2  | Not-determined | Genome-fragment | NA    | 0 |
| S16_extracted_97094       | 3480  | No  | NA  | 0  | 0  | Not-determined | Genome-fragment | NA    | 0 |
| S16_extracted_97207       | 5060  | No  | NA  | 0  | 2  | Not-determined | Genome-fragment | NA    | 0 |
| S16_extracted_97242       | 1414  | No  | NA  | 0  | 0  | Not-determined | Genome-fragment | NA    | 0 |
| S16_extracted_97249       | 1216  | No  | NA  | 0  | 1  | Not-determined | Genome-fragment | NA    | 0 |
| S16_extracted_97279       | 48249 | No  | NA  | 19 | 0  | High-quality   | Genome-fragment | 99.38 | 0 |
| S16_extracted_97308       | 1761  | No  | NA  | 0  | 0  | Not-determined | Genome-fragment | NA    | 0 |
| S5_vs_k141_45695[full]    | 2544  | No  | NA  | 0  | 0  | Low-quality    | Genome-fragment | 6.02  | 0 |
| S16_extracted_97346       | 1473  | No  | NA  | 0  | 2  | Not-determined | Genome-fragment | NA    | 0 |
| S16_extracted_97389       | 1584  | No  | NA  | 0  | 1  | Not-determined | Genome-fragment | NA    | 0 |
| S16_extracted_97390       | 1035  | No  | NA  | 0  | 0  | Not-determined | Genome-fragment | NA    | 0 |
| S5_vs_k141_137496[full]   | 2544  | No  | NA  | 1  | 0  | Low-quality    | Genome-fragment | 3.81  | 0 |
| S16_extracted_97514       | 2499  | No  | NA  | 0  | 0  | Not-determined | Genome-fragment | NA    | 0 |
| S14_vs_k141_52357[full]   | 2545  | No  | NA  | 1  | 0  | Low-quality    | Genome-fragment | 4.29  | 0 |
| S16_extracted_97639       | 6909  | No  | NA  | 0  | 0  | Not-determined | Genome-fragment | NA    | 0 |
| S16_extracted_97641       | 1204  | No  | NA  | 0  | 0  | Not-determined | Genome-fragment | NA    | 0 |
| S6_vs_k141_34271[full]    | 2546  | No  | NA  | 0  | 0  | Low-quality    | Genome-fragment | 3.57  | 0 |
| S16_extracted_97707       | 1189  | No  | NA  | 0  | 0  | Not-determined | Genome-fragment | NA    | 0 |
| S16_extracted_97731       | 10717 | No  | NA  | 0  | 11 | Not-determined | Genome-fragment | NA    | 0 |
| S16_extracted_97749       | 1626  | No  | NA  | 0  | 1  | Not-determined | Genome-fragment | NA    | 0 |
| S16_extracted_97846       | 1233  | No  | NA  | 0  | 2  | Not-determined | Genome-fragment | NA    | 0 |
| S16_extracted_97847       | 3373  | No  | NA  | 0  | 1  | Not-determined | Genome-fragment | NA    | 0 |
| S16_extracted_97882       | 1718  | No  | NA  | 0  | 1  | Not-determined | Genome-fragment | NA    | 0 |
| S16_extracted_97885       | 3619  | No  | NA  | 0  | 4  | Not-determined | Genome-fragment | NA    | 0 |
| S16_extracted_97929       | 1230  | No  | NA  | 0  | 1  | Not-determined | Genome-fragment | NA    | 0 |
| S16_extracted_98021       | 1276  | No  | NA  | 0  | 1  | Not-determined | Genome-fragment | NA    | 0 |
| S16_extracted_98052       | 2186  | No  | NA  | 0  | 1  | Not-determined | Genome-fragment | NA    | 0 |
| S16_extracted_98153       | 1058  | No  | NA  | 0  | 1  | Not-determined | Genome-fragment | NA    | 0 |
| S16_extracted_98251       | 1193  | No  | NA  | 0  | 0  | Not-determined | Genome-fragment | NA    | 0 |
| S16_extracted_98341       | 3420  | No  | NA  | 0  | 2  | Not-determined | Genome-fragment | NA    | 0 |
| S16_extracted_98614       | 3101  | No  | NA  | 0  | 1  | Not-determined | Genome-fragment | NA    | 0 |
| S8_vs_k141_166568[full]   | 2546  | No  | NA  | 1  | 0  | Low-quality    | Genome-fragment | 6.06  | 0 |
| S16_extracted_98736       | 1111  | No  | NA  | 0  | 0  | Not-determined | Genome-fragment | NA    | 0 |
| S16_extracted_98760       | 4071  | No  | NA  | 0  | 3  | Not-determined | Genome-fragment | NA    | 0 |
| S16_extracted_98788       | 1113  | No  | NA  | 0  | 2  | Not-determined | Genome-fragment | NA    | 0 |
| S16_extracted_98869       | 1633  | No  | NA  | 0  | 1  | Not-determined | Genome-fragment | NA    | 0 |
| S16_extracted_98933       | 1403  | No  | NA  | 0  | 2  | Not-determined | Genome-fragment | NA    | 0 |
| S16_extracted_99017       | 3630  | No  | NA  | 0  | 7  | Not-determined | Genome-fragment | NA    | 0 |
| S16_extracted_99025       | 1391  | No  | NA  | 0  | 1  | Not-determined | Genome-fragment | NA    | 0 |
| S16_extracted_99056       | 4933  | No  | NA  | 0  | 3  | Not-determined | Genome-fragment | NA    | 0 |
| S16_extracted_99094       | 1691  | No  | NA  | 0  | 0  | Not-determined | Genome-fragment | NA    | 0 |
| S16_extracted_99169       | 1336  | No  | NA  | 0  | 1  | Not-determined | Genome-fragment | NA    | 0 |
| S17_vs_k141_73212[full]   | 2547  | No  | NA  | 0  | 0  | Low-quality    | Genome-fragment | 2.67  | 0 |
| S16_extracted_99332       | 1380  | No  | NA  | 0  | 1  | Not-determined | Genome-fragment | NA    | 0 |
| S16_extracted_99374       | 6072  | No  | NA  | 0  | 3  | Not-determined | Genome-fragment | NA    | 0 |
| S16_extracted_99442       | 2555  | No  | NA  | 0  | 2  | Not-determined | Genome-fragment | NA    | 0 |
| S16_extracted_99582       | 1391  | No  | NA  | 0  | 1  | Not-determined | Genome-fragment | NA    | 0 |
| S16_extracted_99731       | 1388  | No  | NA  | 0  | 1  | Not-determined | Genome-fragment | NA    | 0 |
| S16_extracted_99814       | 3556  | No  | NA  | 0  | 0  | Not-determined | Genome-fragment | NA    | 0 |
| S16_extracted_100001      | 3406  | No  | NA  | 0  | 0  | Not-determined | Genome-fragment | NA    | 0 |
| S16_extracted_100088      | 4508  | No  | NA  | 0  | 2  | Not-determined | Genome-fragment | NA    | 0 |
| S16_extracted_100235      | 18057 | No  | NA  | 9  | 0  | Medium-quality | Genome-fragment | 84.79 | 0 |
| S16_extracted_100237      | 1690  | No  | NA  | 0  | 0  | Not-determined | Genome-fragment | NA    | 0 |
| S16_extracted_100378      | 31039 | No  | NA  | 23 | 0  | Medium-quality | Genome-fragment | 51.79 | 0 |
| S16_extracted_100392      | 5073  | No  | NA  | 0  | 2  | Not-determined | Genome-fragment | NA    | 0 |
| S7_vs_90087[full]         | 2547  | No  | NA  | 0  | 1  | Low-quality    | Genome-fragment | 6.15  | 0 |
| S16_extracted_100473      | 16067 | No  | NA  | 6  | 0  | Medium-quality | Genome-fragment | 72.45 | 0 |
| S8_extracted_k141_168753  | 2547  | No  | NA  | 5  | 0  | Low-quality    | Genome-fragment | 4.16  | 0 |
| S16_extracted_100637      | 1478  | No  | NA  | 0  | 1  | Not-determined | Genome-fragment | NA    | 0 |
| S9_vs_k141_58395[full]    | 2548  | No  | NA  | 0  | 5  | Low-quality    | Genome-fragment | 1     | 0 |
| S16_extracted_100934      | 1190  | No  | NA  | 0  | 1  | Not-determined | Genome-fragment | NA    | 0 |
| S16_extracted_100944      | 1001  | No  | NA  | 0  | 1  | Not-determined | Genome-fragment | NA    | 0 |
| S16_extracted_100958      | 1422  | No  | NA  | 0  | 0  | Not-determined | Genome-fragment | NA    | 0 |
| S11_vs_k141_95696[full]   | 2549  | No  | NA  | 0  | 0  | Low-quality    | Genome-fragment | 4.43  | 0 |
| S8_extracted_k141_103583  | 2549  | No  | NA  | 0  | 0  | Low-quality    | Genome-fragment | 1.49  | 0 |
| S3_vs_k141_119100[full]   | 2550  | No  | NA  | 0  | 1  | Low-quality    | Genome-fragment | 4.48  | 0 |
| S12_vs_k141_150512[full]  | 2550  | No  | NA  | 0  | 0  | Low-quality    | Genome-fragment | 6.11  | 0 |
| S3_extracted_k141_67904   | 2551  | No  | NA  | 1  | 0  | Low-quality    | Genome-fragment | 1.52  | 0 |
| S7_vs_73965[full]         | 2551  | No  | NA  | 0  | 0  | Low-quality    | Genome-fragment | 18.3  | 0 |
| S16_extracted_101434      | 1478  | No  | NA  | 0  | 0  | Not-determined | Genome-fragment | NA    | 0 |
| S11_vs_k141_99117[full]   | 2552  | No  | NA  | 2  | 0  | Low-quality    | Genome-fragment | 2.3   | 0 |
| S16_extracted_101453      | 2191  | No  | NA  | 0  | 1  | Not-determined | Genome-fragment | NA    | 0 |
| S16_extracted_101540      | 1674  | No  | NA  | 0  | 1  | Not-determined | Genome-fragment | NA    | 0 |
| S16_extracted_101544      | 1263  | No  | NA  | 0  | 1  | Not-determined | Genome-fragment | NA    | 0 |
| S1_vs_k141_117076[full]   | 2552  | No  | NA  | 2  | 0  | Low-quality    | Genome-fragment | 5.86  | 0 |
| S16_extracted_101586      | 1627  | No  | NA  | 0  | 2  | Not-determined | Genome-fragment | NA    | 0 |
| S16_extracted_101590      | 1166  | No  | NA  | 0  | 1  | Not-determined | Genome-fragment | NA    | 0 |
| S16_extracted_101792      | 1140  | No  | NA  | 0  | 0  | Not-determined | Genome-fragment | NA    | 0 |
| S16_extracted_101795      | 5110  | No  | NA  | 0  | 3  | Not-determined | Genome-fragment | NA    | 0 |
| S16_vs_155195[full]       | 2553  | No  | NA  | 0  | 2  | Low-quality    | Genome-fragment | 3.08  | 0 |
| S16_extracted_101898</    |       |     |     |    |    |                |                 |       |   |



|                            |       |    |    |    |   |                |                 |       |      |
|----------------------------|-------|----|----|----|---|----------------|-----------------|-------|------|
| S7_vs_129609  full         | 2555  | No | NA | 1  | 0 | Low-quality    | Genome-fragment | 4.85  | 0    |
| S9_vs_k141_52922  full     | 2556  | No | NA | 0  | 0 | Low-quality    | Genome-fragment | 1.3   | 0    |
| S16_extracted_103859       | 1471  | No | NA | 0  | 1 | Not-determined | Genome-fragment | NA    | 0    |
| S16_extracted_104094       | 3762  | No | NA | 0  | 4 | Not-determined | Genome-fragment | NA    | 0    |
| S3_vs_k141_75992  full     | 2557  | No | NA | 4  | 0 | Low-quality    | Genome-fragment | 0     | 6.34 |
| S16_extracted_104115       | 1504  | No | NA | 0  | 1 | Not-determined | Genome-fragment | NA    | 0    |
| S7_vs_27343  full          | 2557  | No | NA | 0  | 0 | Low-quality    | Genome-fragment | 5.99  | 0    |
| S16_extracted_104157       | 2057  | No | NA | 0  | 1 | Not-determined | Genome-fragment | NA    | 0    |
| S16_extracted_104223       | 4378  | No | NA | 0  | 0 | Not-determined | Genome-fragment | NA    | 0    |
| S16_extracted_104341       | 1594  | No | NA | 0  | 0 | Not-determined | Genome-fragment | NA    | 0    |
| S7_vs_71762  full          | 2557  | No | NA | 0  | 2 | Low-quality    | Genome-fragment | 1.23  | 0    |
| S16_extracted_104415       | 1315  | No | NA | 0  | 0 | Not-determined | Genome-fragment | NA    | 0    |
| S7_vs_87526  full          | 2557  | No | NA | 2  | 0 | Low-quality    | Genome-fragment | 5.42  | 0    |
| S11_vs_k141_7871  full     | 2558  | No | NA | 0  | 2 | Low-quality    | Genome-fragment | 2.99  | 0    |
| S14_vs_k141_41509  full    | 2558  | No | NA | 1  | 0 | Low-quality    | Genome-fragment | 1.91  | 0    |
| S5_vs_k141_141566  full    | 2558  | No | NA | 0  | 1 | Low-quality    | Genome-fragment | 0.63  | 0    |
| S16_extracted_104555       | 1652  | No | NA | 0  | 1 | Not-determined | Genome-fragment | NA    | 0    |
| S16_extracted_104618       | 3055  | No | NA | 0  | 1 | Not-determined | Genome-fragment | NA    | 0    |
| S7_vs_9212  full           | 2559  | No | NA | 1  | 0 | Low-quality    | Genome-fragment | 9.41  | 0    |
| S16_extracted_104871       | 1638  | No | NA | 0  | 0 | Not-determined | Genome-fragment | NA    | 0    |
| S16_extracted_105042       | 4668  | No | NA | 0  | 4 | Not-determined | Genome-fragment | NA    | 0    |
| S16_extracted_105144       | 1025  | No | NA | 0  | 0 | Not-determined | Genome-fragment | NA    | 0    |
| S16_vs_8470  full          | 2559  | No | NA | 3  | 0 | Low-quality    | Genome-fragment | 1.9   | 0    |
| S8_vs_k141_175725  full    | 2559  | No | NA | 0  | 0 | Low-quality    | Genome-fragment | 4.47  | 0    |
| S3_vs_k141_54843  full     | 2560  | No | NA | 3  | 0 | Low-quality    | Genome-fragment | 5.64  | 0    |
| S16_extracted_105346       | 1378  | No | NA | 0  | 0 | Not-determined | Genome-fragment | NA    | 0    |
| S16_extracted_105442       | 1211  | No | NA | 0  | 0 | Not-determined | Genome-fragment | NA    | 0    |
| S7_vs_32335  full          | 2560  | No | NA | 0  | 0 | Low-quality    | Genome-fragment | 5.25  | 0    |
| S16_extracted_105482       | 1294  | No | NA | 0  | 0 | Not-determined | Genome-fragment | NA    | 0    |
| S16_extracted_105520       | 1271  | No | NA | 0  | 0 | Not-determined | Genome-fragment | NA    | 0    |
| S16_extracted_105558       | 1096  | No | NA | 0  | 2 | Not-determined | Genome-fragment | NA    | 0    |
| S16_extracted_105574       | 2255  | No | NA | 0  | 1 | Not-determined | Genome-fragment | NA    | 0    |
| S16_extracted_105751       | 1853  | No | NA | 0  | 2 | Not-determined | Genome-fragment | NA    | 0    |
| S16_vs_119131  full        | 2560  | No | NA | 1  | 0 | Low-quality    | Genome-fragment | 1.97  | 0    |
| S12_vs_k141_169202  H2gene | 2560  | No | NA | 1  | 0 | Low-quality    | Genome-fragment | 48.93 | 0    |
| S16_extracted_106076       | 3215  | No | NA | 0  | 1 | Not-determined | Genome-fragment | NA    | 0    |
| S16_extracted_106370       | 1321  | No | NA | 0  | 1 | Not-determined | Genome-fragment | NA    | 0    |
| S16_extracted_106436       | 1742  | No | NA | 0  | 1 | Not-determined | Genome-fragment | NA    | 0    |
| S16_extracted_106445       | 2117  | No | NA | 0  | 1 | Not-determined | Genome-fragment | NA    | 0    |
| S8_vs_k141_186925  full    | 2560  | No | NA | 2  | 0 | Low-quality    | Genome-fragment | 6.62  | 0    |
| S16_extracted_106559       | 4338  | No | NA | 0  | 4 | Not-determined | Genome-fragment | NA    | 0    |
| S16_extracted_106583       | 1591  | No | NA | 0  | 1 | Not-determined | Genome-fragment | NA    | 0    |
| S16_extracted_106696       | 2098  | No | NA | 0  | 3 | Not-determined | Genome-fragment | NA    | 0    |
| S16_extracted_106708       | 3413  | No | NA | 0  | 1 | Not-determined | Genome-fragment | NA    | 0    |
| S16_extracted_106750       | 6953  | No | NA | 0  | 2 | Not-determined | Genome-fragment | NA    | 0    |
| S16_extracted_106763       | 1584  | No | NA | 0  | 1 | Not-determined | Genome-fragment | NA    | 0    |
| S16_extracted_106802       | 1741  | No | NA | 0  | 1 | Not-determined | Genome-fragment | NA    | 0    |
| S16_extracted_106871       | 3515  | No | NA | 0  | 0 | Not-determined | Genome-fragment | NA    | 0    |
| S16_extracted_106897       | 4134  | No | NA | 0  | 0 | Not-determined | Genome-fragment | NA    | 0    |
| S16_extracted_106919       | 1050  | No | NA | 0  | 1 | Not-determined | Genome-fragment | NA    | 0    |
| S9_vs_k141_49478  full     | 2561  | No | NA | 0  | 1 | Low-quality    | Genome-fragment | 3.52  | 0    |
| S16_extracted_106949       | 3383  | No | NA | 0  | 0 | Not-determined | Genome-fragment | NA    | 0    |
| S16_extracted_106951       | 2231  | No | NA | 0  | 1 | Not-determined | Genome-fragment | NA    | 0    |
| S16_extracted_106985       | 3899  | No | NA | 0  | 2 | Not-determined | Genome-fragment | NA    | 0    |
| S16_extracted_107013       | 2482  | No | NA | 0  | 2 | Not-determined | Genome-fragment | NA    | 0    |
| S5_vs_k141_55578  full     | 2562  | No | NA | 0  | 0 | Low-quality    | Genome-fragment | 1.77  | 0    |
| S16_extracted_107065       | 1015  | No | NA | 0  | 0 | Not-determined | Genome-fragment | NA    | 0    |
| S16_extracted_107080       | 2408  | No | NA | 0  | 1 | Not-determined | Genome-fragment | NA    | 0    |
| S16_extracted_107270       | 1504  | No | NA | 0  | 0 | Not-determined | Genome-fragment | NA    | 0    |
| S16_extracted_107366       | 1836  | No | NA | 0  | 0 | Not-determined | Genome-fragment | NA    | 0    |
| S16_extracted_107428       | 4273  | No | NA | 0  | 0 | Not-determined | Genome-fragment | NA    | 0    |
| S16_extracted_107559       | 1234  | No | NA | 0  | 1 | Not-determined | Genome-fragment | NA    | 0    |
| S16_extracted_107561       | 8680  | No | NA | 0  | 3 | Not-determined | Genome-fragment | NA    | 0    |
| S10_extracted_34002        | 2562  | No | NA | 2  | 0 | Low-quality    | Genome-fragment | 3.43  | 0    |
| S16_extracted_107594       | 3141  | No | NA | 0  | 1 | Not-determined | Genome-fragment | NA    | 0    |
| S11_vs_k141_212551  full   | 2563  | No | NA | 1  | 0 | Low-quality    | Genome-fragment | 4.31  | 0    |
| S14_vs_k141_39828  full    | 2563  | No | NA | 2  | 0 | Low-quality    | Genome-fragment | 9.54  | 0    |
| S16_extracted_107697       | 1339  | No | NA | 0  | 2 | Not-determined | Genome-fragment | NA    | 0    |
| S16_extracted_107759       | 1030  | No | NA | 0  | 0 | Not-determined | Genome-fragment | NA    | 0    |
| S14_vs_k141_62043  full    | 2563  | No | NA | 0  | 1 | Low-quality    | Genome-fragment | 1.8   | 0    |
| S9_vs_k141_15962  full     | 2564  | No | NA | 3  | 0 | Low-quality    | Genome-fragment | 7.88  | 0    |
| S11_vs_k141_33198  full    | 2564  | No | NA | 0  | 0 | Low-quality    | Genome-fragment | NA    | 0    |
| S16_extracted_107955       | 1070  | No | NA | 0  | 1 | Not-determined | Genome-fragment | NA    | 0    |
| S3_vs_k141_35561  full     | 2564  | No | NA | 0  | 3 | Low-quality    | Genome-fragment | 3.15  | 0    |
| S16_extracted_107977       | 5162  | No | NA | 0  | 3 | Not-determined | Genome-fragment | NA    | 0    |
| S16_extracted_107993       | 1598  | No | NA | 0  | 1 | Not-determined | Genome-fragment | NA    | 0    |
| S16_extracted_108030       | 1981  | No | NA | 0  | 0 | Not-determined | Genome-fragment | NA    | 0    |
| S16_extracted_108071       | 1167  | No | NA | 0  | 1 | Not-determined | Genome-fragment | NA    | 0    |
| S16_extracted_108169       | 1149  | No | NA | 0  | 0 | Not-determined | Genome-fragment | NA    | 0    |
| S16_extracted_108177       | 3622  | No | NA | 0  | 1 | Not-determined | Genome-fragment | NA    | 0    |
| S12_extracted_k141_4810    | 2564  | No | NA | 1  | 0 | Low-quality    | Genome-fragment | 5.86  | 0    |
| S16_extracted_108260       | 1381  | No | NA | 0  | 1 | Not-determined | Genome-fragment | NA    | 0    |
| S16_extracted_108262       | 2943  | No | NA | 0  | 2 | Not-determined | Genome-fragment | NA    | 0    |
| S16_extracted_108342       | 8223  | No | NA | 0  | 2 | Not-determined | Genome-fragment | NA    | 0    |
| S16_extracted_108528       | 4195  | No | NA | 0  | 0 | Not-determined | Genome-fragment | NA    | 0    |
| S16_extracted_108554       | 57027 | No | NA | 19 | 2 | High-quality   | High-quality    | 98.93 | 0    |
| S16_extracted_108582       | 1124  | No | NA | 0  | 1 | Not-determined | Genome-fragment | NA    | 0    |
| S16_extracted_108749       | 1107  | No | NA | 0  | 0 | Not-determined | Genome-fragment | NA    | 0    |
| S12_vs_k141_812271  full   | 2564  | No | NA | 0  | 0 | Low-quality    | Genome-fragment | 4.33  | 0    |
| S16_extracted_108922       | 2111  | No | NA | 0  | 0 | Not-determined | Genome-fragment | NA    | 0    |
| S16_extracted_109062       | 1143  | No | NA | 0  | 0 | Not-determined | Genome-fragment | NA    | 0    |
| S13_extracted_135681       | 2565  | No | NA | 0  | 2 | Low-quality    | Genome-fragment | 0.7   | 0    |
| S1_vs_k141_8486  full      | 2565  | No | NA | 0  | 1 | Low-quality    | Genome-fragment | 1.19  | 0    |
| S9_vs_k141_25090  full     | 2565  | No | NA | 0  | 1 | Low-quality    | Genome-fragment | 9.01  | 0    |
| S16_extracted_109415       | 1403  | No | NA | 0  | 0 | Not-determined | Genome-fragment | NA    | 0    |
| S3_vs_k141_63056  H2gene   | 2565  | No | NA | 1  | 0 | Low-quality    | Genome-fragment | 2.76  | 0    |
| S12_vs_k141_358061  full   | 2565  | No | NA | 5  | 0 | Low-quality    | Genome-fragment | 6.16  | 0    |
| S17_vs_k141_533021  full   | 2566  | No | NA | 0  | 2 | Low-quality    | Genome-fragment | 0.59  | 0    |
| S16_extracted_109477       | 1258  | No | NA | 0  | 0 | Not-determined | Genome-fragment | NA    | 0    |
| S16_extracted_109639       | 1065  | No | NA | 0  | 0 | Not-determined | Genome-fragment | NA    | 0    |
| S16_extracted_109667       | 2177  | No | NA | 0  | 8 | Not-determined | Genome-fragment | NA    | 0    |
| S16_extracted_109699       | 1402  | No | NA | 0  | 0 | Not-determined | Genome-fragment | NA    | 0    |
| S16_extracted_109731       | 5075  | No | NA | 0  | 3 | Not-determined | Genome-fragment | NA    | 0    |
| S16_extracted_109825       | 1569  | No | NA | 0  | 0 | Not-determined | Genome-fragment | NA    | 0    |
| S16_extracted_109881       | 1065  | No | NA | 0  | 2 | Not-determined | Genome-fragment | NA    | 0    |
| S1_extracted_k141_72186    | 2566  | No | NA | 0  | 0 | Low-quality    | Genome-fragment | 4.4   | 0    |
| S16_extracted_110168       | 1530  | No | NA | 0  | 1 | Not-determined | Genome-fragment | NA    | 0    |
| S16_extracted_110187       | 1577  | No | NA | 0  | 0 | Not-determined | Genome-fragment | NA    | 0    |
| S16_extracted_110230       | 1097  | No | NA | 0  | 2 | Not-determined | Genome-fragment | NA    | 0    |
| S1_vs_k141_183561  full    | 2566  | No | NA | 1  | 0 | Low-quality    | Genome-fragment | 3.54  | 0    |
| S3_vs_k141_131180  full    | 2566  | No | NA | 1  | 0 | Low-quality    | Genome-fragment | 3.25  | 0    |
| S16_extracted_110485       | 4600  | No | NA | 0  | 4 | Not-determined | Genome-fragment | NA    | 0    |
| S16_extracted_110711       | 6739  | No | NA | 0  | 6 | Not-determined | Genome-fragment | NA    | 0    |
| S16_extracted_110713       | 1168  | No | NA | 0  | 1 | Not-determined | Genome-fragment | NA    | 0    |
| S16_extracted_110737       | 4660  | No | NA | 0  | 3 | Not-determined | Genome-fragment | NA    | 0    |
| S16_extracted_110757       | 1012  | No | NA | 0  | 1 | Not-determined | Genome-fragment | NA    | 0    |
| S16_extracted_110863       | 1274  | No | NA | 0  | 1 | Not-determined | Genome-fragment | NA    | 0    |
| S16_extracted_110886       | 1072  | No | NA | 0  | 1 | Not-determined | Genome-fragment | NA    | 0    |
| S16_extracted_110905       | 1311  | No | NA | 0  | 0 | Not-determined | Genome-fragment | NA    | 0    |
| S10_extracted_107012       | 2566  | No | NA | 0  | 3 | Low-quality    | Genome-fragment | 0.82  | 0    |
| S16_extracted_110993       | 1006  | No | NA | 0  | 2 | Not-determined | Genome-fragment | NA    | 0    |
| S16_extracted_111036       | 1007  | No | NA | 0  | 1 | Not-determined | Genome-fragment | NA    | 0    |
| S16_extracted_111062       | 2062  | No | NA | 0  | 1 | Not-determined | Genome-fragment | NA    | 0    |
| S16_extracted_111077       | 1635  | No | NA | 0  | 3 | Not-determined | Genome-fragment | NA    | 0    |
| S16_extracted_111127       | 2009  | No | NA | 0  | 0 | Not-determined | Genome-fragment | NA    | 0    |
| S16_extracted_111290       | 1420  | No | NA | 0  | 1 | Not-determined | Genome-fragment | NA    | 0    |
| S16_extracted_111355       | 2241  | No | NA | 0  | 1 | Not-determined | Genome-fragment | NA    | 0    |
| S16_extracted_111383       | 3301  | No | NA | 0  | 2 | Not-determined | Genome-fragment | NA    | 0    |
| S12_vs_k141_1703151  full  | 2566  | No | NA | 1  | 0 | Low-quality    | Genome-fragment | 7.19  | 0    |
| S16_extracted_111656       | 1525  | No | NA | 0  | 1 | Not-determined | Genome-fragment | NA    | 0    |
| S9_vs_k141_24118  full     | 2567  | No | NA | 2  | 0 | Low-quality    | Genome-fragment | 5.82  | 0    |
| S14_extracted_k141_23375   | 2567  | No | NA | 7  | 0 | Low-quality    | Genome-fragment | 8.46  | 0    |
| S16_vs_23375  full         | 2567  | No | NA | 0  | 0 | Low-quality    | Genome-fragment | 5.38  | 0    |
| S15_extracted_22508        | 2567  | No | NA | 1  | 0 | Low-quality    | Genome-fragment | 5.74  | 0    |
| S17_vs_k141_89055  full    | 2568  | No | NA | 0  | 0 | Low-quality    | Genome-fragment | 4.63  | 0    |
| S16_extracted_112051       | 3154  | No | NA | 0  | 3 | Not-determined | Genome-fragment | NA    | 0    |
| S16_extracted_112202       | 4018  | No | NA | 0  | 3 | Not-determined | Genome-fragment | NA    | 0    |
| S11_vs_k141_34621  full    | 2568  | No | NA | 2  | 0 | Low-quality    | Genome-fragment | 7.64  | 0    |
| S16_extracted_112377       | 1029  | No | NA | 0  | 1 | Not-determined | Genome-fragment | NA    | 0    |
| S5_vs_k141_4754  full      | 2568  | No | NA | 3  | 0 | Low-quality    | Genome-fragment | 1.18  | 0    |
| S16_extracted_112643       | 1250  | No | NA | 0  | 1 | Not-determined | Genome-fragment | NA    | 0    |
| S16_extracted_112681       | 1346  | No | NA | 0  | 1 | Not-determined | Genome-fragment | NA    | 0    |
| S16_extracted_112737       | 1340  | No | NA | 0  | 2 | Not-determined | Genome-fragment | NA    | 0    |
| S7_vs_105946  full         | 2568  | No | NA | 2  | 0 | Low-quality    | Genome-fragment | 6     | 0    |
| S7_vs_114081  full         | 2568  | No | NA | 0  | 0 | Low-quality    | Genome-fragment | 5.09  | 0    |
| S16_extracted_113074       | 2524  | No | NA | 0  | 1 | Not-determined | Genome-fragment | NA    | 0    |
| S16_extracted_113089       | 1337  | No | NA | 0  | 0 | Not-determined | Genome-fragment | NA    | 0    |
| S16_extracted_113207       | 1558  | No | NA | 0  | 2 | Not-determined | Genome-fragment | NA    | 0    |
| S16_extracted_113434       |       |    |    |    |   |                |                 |       |      |



|                          |       |     |      |    |                |                 |                 |      |       |
|--------------------------|-------|-----|------|----|----------------|-----------------|-----------------|------|-------|
| S16_extracted_114555     | 3199  | No  | NA   | 0  | 2              | Not-determined  | Genome-fragment | NA   | 0     |
| S16_extracted_114653     | 3315  | No  | NA   | 0  | 2              | Not-determined  | Genome-fragment | NA   | 0     |
| S16_extracted_114787     | 1258  | No  | NA   | 0  | 2              | Not-determined  | Genome-fragment | NA   | 0     |
| S16_extracted_114814     | 3892  | No  | NA   | 0  | 0              | Not-determined  | Genome-fragment | NA   | 0     |
| S16_extracted_114845     | 1226  | No  | NA   | 0  | 1              | Not-determined  | Genome-fragment | NA   | 0     |
| S7_vs_145141  2 genome   | 2571  | No  | NA   | 1  | 0              | Low-quality     | Genome-fragment | NA   | 7.47  |
| S16_vs_86919  full       | 2571  | No  | NA   | 0  | 0              | Low-quality     | Genome-fragment | NA   | 5.99  |
| S16_extracted_115015     | 1195  | No  | NA   | 0  | 1              | Not-determined  | Genome-fragment | NA   | 0     |
| S16_extracted_115021     | 1769  | No  | NA   | 0  | 0              | Not-determined  | Genome-fragment | NA   | 0     |
| S12_vs_k141_172942  full | 2571  | No  | NA   | 0  | 0              | Low-quality     | Genome-fragment | NA   | 2.92  |
| S16_vs_8811  full        | 2572  | No  | NA   | 1  | 0              | Low-quality     | Genome-fragment | NA   | 4.72  |
| S16_extracted_115204     | 1558  | No  | NA   | 0  | 1              | Not-determined  | Genome-fragment | NA   | 0     |
| S16_extracted_115345     | 1020  | No  | NA   | 0  | 0              | Not-determined  | Genome-fragment | NA   | 0     |
| S16_extracted_115375     | 14345 | No  | NA   | 0  | 10             | Not-determined  | Genome-fragment | NA   | 0     |
| S16_extracted_115483     | 1187  | No  | NA   | 0  | 0              | Not-determined  | Genome-fragment | NA   | 0     |
| S16_extracted_115565     | 1152  | No  | NA   | 0  | 0              | Not-determined  | Genome-fragment | NA   | 0     |
| S16_extracted_115589     | 6273  | No  | NA   | 0  | 3              | Not-determined  | Genome-fragment | NA   | 0     |
| S16_extracted_115679     | 20057 | No  | NA   | 0  | 8              | Not-determined  | Genome-fragment | NA   | 0     |
| S16_extracted_115692     | 1251  | No  | NA   | 0  | 1              | Not-determined  | Genome-fragment | NA   | 0     |
| S16_extracted_115793     | 1204  | No  | NA   | 0  | 0              | Not-determined  | Genome-fragment | NA   | 0     |
| S16_extracted_115799     | 3680  | No  | NA   | 0  | 3              | Not-determined  | Genome-fragment | NA   | 0     |
| S16_extracted_115879     | 5335  | No  | NA   | 0  | 0              | Not-determined  | Genome-fragment | NA   | 0     |
| S16_extracted_115896     | 1585  | No  | NA   | 0  | 1              | Not-determined  | Genome-fragment | NA   | 0     |
| S16_vs_102597  full      | 2572  | No  | NA   | 0  | 0              | Low-quality     | Genome-fragment | NA   | 3.22  |
| S16_extracted_115969     | 4178  | No  | NA   | 0  | 1              | Not-determined  | Genome-fragment | NA   | 0     |
| S16_extracted_116042     | 1004  | No  | NA   | 0  | 0              | Not-determined  | Genome-fragment | NA   | 0     |
| S16_extracted_116072     | 4429  | No  | NA   | 0  | 1              | Not-determined  | Genome-fragment | NA   | 0     |
| S16_extracted_116102     | 1297  | No  | NA   | 0  | 1              | Not-determined  | Genome-fragment | NA   | 0     |
| S16_extracted_116135     | 3280  | No  | NA   | 2  | Not-determined | Genome-fragment | NA              | 0    |       |
| S10_vs_70402  full       | 2572  | No  | NA   | 3  | 0              | Low-quality     | Genome-fragment | NA   | 1.88  |
| S16_extracted_116198     | 4654  | No  | NA   | 0  | 2              | Not-determined  | Genome-fragment | NA   | 0     |
| S16_extracted_116443     | 12819 | No  | NA   | 10 | Not-determined | Genome-fragment | NA              | 0    |       |
| S16_extracted_116454     | 1251  | No  | NA   | 0  | 1              | Not-determined  | Genome-fragment | NA   | 0     |
| S16_extracted_116511     | 1130  | No  | NA   | 0  | 0              | Not-determined  | Genome-fragment | NA   | 0     |
| S12_vs_k141_6775  full   | 2572  | No  | NA   | 0  | 0              | Low-quality     | Genome-fragment | NA   | 6.21  |
| S16_extracted_116551     | 2774  | No  | NA   | 0  | 2              | Not-determined  | Genome-fragment | NA   | 0     |
| S11_vs_k141_39411  full  | 2573  | No  | NA   | 1  | 0              | Low-quality     | Genome-fragment | NA   | 3.79  |
| S16_extracted_116599     | 4744  | No  | NA   | 0  | 5              | Not-determined  | Genome-fragment | NA   | 0     |
| S16_extracted_116668     | 5615  | No  | NA   | 1  | Not-determined | Genome-fragment | NA              | 0    |       |
| S8_vs_k141_132669  full  | 2573  | No  | NA   | 0  | 0              | Low-quality     | Genome-fragment | NA   | 6.02  |
| S16_extracted_116803     | 1576  | No  | NA   | 0  | 0              | Not-determined  | Genome-fragment | NA   | 0     |
| S16_extracted_116860     | 3335  | No  | NA   | 0  | 2              | Not-determined  | Genome-fragment | NA   | 0     |
| S16_extracted_116965     | 1150  | No  | NA   | 0  | 1              | Not-determined  | Genome-fragment | NA   | 0     |
| S16_extracted_117020     | 3272  | No  | NA   | 0  | 2              | Not-determined  | Genome-fragment | NA   | 0     |
| S7_vs_68431  full        | 2574  | No  | NA   | 3  | 0              | Low-quality     | Genome-fragment | NA   | 5.32  |
| S12_vs_k141_164821  full | 2574  | No  | NA   | 2  | 0              | Low-quality     | Genome-fragment | NA   | 7.6   |
| S16_extracted_117240     | 1096  | No  | NA   | 0  | 0              | Not-determined  | Genome-fragment | NA   | 0     |
| S16_extracted_117372     | 1213  | No  | NA   | 0  | 1              | Not-determined  | Genome-fragment | NA   | 0     |
| S1_extracted_k141_101599 | 2575  | No  | NA   | 0  | 0              | Low-quality     | Genome-fragment | NA   | 3.46  |
| S16_extracted_117695     | 1888  | No  | NA   | 0  | 1              | Not-determined  | Genome-fragment | NA   | 0     |
| S5_vs_k141_106405  full  | 2575  | No  | NA   | 6  | 0              | Low-quality     | Genome-fragment | NA   | 4.47  |
| S16_extracted_117830     | 1038  | No  | NA   | 0  | 0              | Not-determined  | Genome-fragment | NA   | 0     |
| S16_extracted_118099     | 1001  | No  | NA   | 0  | 1              | Not-determined  | Genome-fragment | NA   | 0     |
| S16_extracted_118130     | 8627  | No  | NA   | 0  | 1              | Not-determined  | Genome-fragment | NA   | 0     |
| S9_vs_k141_15638  full   | 2576  | No  | NA   | 1  | 0              | Low-quality     | Genome-fragment | NA   | 3.37  |
| S16_extracted_118211     | 1939  | No  | NA   | 1  | 2              | Not-determined  | Genome-fragment | NA   | 0     |
| S9_vs_k141_55292  full   | 2576  | No  | NA   | 3  | 0              | Low-quality     | Genome-fragment | NA   | 8.1   |
| S14_vs_k141_13208  full  | 2576  | No  | NA   | 3  | 0              | Low-quality     | Genome-fragment | NA   | 5.37  |
| S16_extracted_118347     | 1750  | No  | NA   | 0  | 0              | Not-determined  | Genome-fragment | NA   | 0     |
| S5_extracted_k141_144717 | 2576  | No  | NA   | 2  | 0              | Low-quality     | Genome-fragment | NA   | 5.57  |
| S16_extracted_118418     | 3189  | No  | NA   | 0  | 2              | Not-determined  | Genome-fragment | NA   | 0     |
| S16_extracted_118427     | 1105  | No  | NA   | 0  | 1              | Not-determined  | Genome-fragment | NA   | 0     |
| S16_extracted_118496     | 1038  | No  | NA   | 0  | 0              | Not-determined  | Genome-fragment | NA   | 0     |
| S5_vs_k141_9147  full    | 2576  | No  | NA   | 3  | 0              | Low-quality     | Genome-fragment | NA   | 4.72  |
| S16_vs_45517  full       | 2576  | No  | NA   | 1  | 1              | Low-quality     | Genome-fragment | NA   | 3.36  |
| S11_extracted_k141_90409 | 2577  | No  | NA   | 0  | 1              | Low-quality     | Genome-fragment | NA   | 8.41  |
| S13_extracted_107871     | 2577  | No  | NA   | 0  | 1              | Low-quality     | Genome-fragment | NA   | 2.54  |
| S16_extracted_118708     | 1320  | No  | NA   | 0  | 1              | Not-determined  | Genome-fragment | NA   | 6.29  |
| S5_extracted_k141_10410  | 2577  | No  | NA   | 0  | 1              | Low-quality     | Genome-fragment | NA   | 0     |
| S16_extracted_118751     | 4696  | No  | NA   | 0  | 5              | Not-determined  | Genome-fragment | NA   | 0     |
| S16_extracted_118777     | 1012  | No  | NA   | 0  | 0              | Not-determined  | Genome-fragment | NA   | 0     |
| S16_extracted_118925     | 1014  | No  | NA   | 0  | 1              | Not-determined  | Genome-fragment | NA   | 0     |
| S16_extracted_119019     | 3428  | No  | NA   | 0  | 3              | Not-determined  | Genome-fragment | NA   | 0     |
| S5_vs_k141_10297  full   | 2577  | No  | NA   | 0  | 3              | Low-quality     | Genome-fragment | NA   | 1.66  |
| S7_vs_21784  full        | 2577  | No  | NA   | 2  | 2              | Low-quality     | Genome-fragment | NA   | 5.29  |
| S6_vs_k141_32951  full   | 2577  | No  | NA   | 2  | 0              | Low-quality     | Genome-fragment | NA   | 5.57  |
| S9_vs_k141_70109  full   | 2578  | No  | NA   | 2  | 0              | Low-quality     | Genome-fragment | NA   | 0     |
| S16_extracted_119276     | 1201  | No  | NA   | 0  | 2              | Not-determined  | Genome-fragment | NA   | 0     |
| S16_extracted_119364     | 7268  | No  | NA   | 0  | 1              | Not-determined  | Genome-fragment | NA   | 0     |
| S16_extracted_119428     | 3535  | No  | NA   | 0  | 3              | Not-determined  | Genome-fragment | NA   | 0     |
| S16_extracted_119489     | 1082  | No  | NA   | 0  | 2              | Not-determined  | Genome-fragment | NA   | 0     |
| S16_extracted_119589     | 1155  | No  | NA   | 0  | 0              | Not-determined  | Genome-fragment | NA   | 0     |
| S16_extracted_119675     | 1131  | No  | NA   | 0  | 1              | Not-determined  | Genome-fragment | NA   | 0     |
| S5_vs_k141_15892  full   | 2578  | No  | NA   | 0  | 0              | Low-quality     | Genome-fragment | NA   | 5.87  |
| S4_extracted_8476        | 2578  | No  | NA   | 0  | 0              | Low-quality     | Genome-fragment | NA   | 8.5   |
| S16_extracted_119738     | 1125  | No  | NA   | 0  | 1              | Not-determined  | Genome-fragment | NA   | 0     |
| S16_extracted_119783     | 1255  | No  | NA   | 0  | 1              | Not-determined  | Genome-fragment | NA   | 0     |
| S16_extracted_119823     | 1002  | No  | NA   | 0  | 1              | Not-determined  | Genome-fragment | NA   | 0     |
| S16_extracted_119834     | 15816 | No  | NA   | 0  | 1              | Medium-quality  | Genome-fragment | NA   | 78.38 |
| S16_extracted_119873     | 1289  | No  | NA   | 0  | 1              | Not-determined  | Genome-fragment | NA   | 0     |
| S6_vs_k141_11743  full   | 2578  | No  | NA   | 1  | 0              | Low-quality     | Genome-fragment | NA   | 6.51  |
| S16_extracted_119928     | 2643  | No  | NA   | 0  | 1              | Not-determined  | Genome-fragment | NA   | 0     |
| S17_vs_k141_104899  full | 2579  | No  | NA   | 0  | 2              | Low-quality     | Genome-fragment | NA   | 5.26  |
| S16_extracted_120095     | 1013  | No  | NA   | 0  | 0              | Not-determined  | Genome-fragment | NA   | 0     |
| S16_extracted_120184     | 4470  | No  | NA   | 0  | 1              | Not-determined  | Genome-fragment | NA   | 0     |
| S16_extracted_120206     | 6138  | No  | NA   | 0  | 3              | Not-determined  | Genome-fragment | NA   | 0     |
| S16_extracted_120319     | 1616  | No  | NA   | 0  | 1              | Not-determined  | Genome-fragment | NA   | 0     |
| S16_extracted_120356     | 1632  | No  | NA   | 0  | 0              | Not-determined  | Genome-fragment | NA   | 0     |
| S1_extracted_k141_86758  | 2579  | No  | NA   | 0  | 0              | Low-quality     | Genome-fragment | NA   | 1.47  |
| S16_extracted_120474     | 1165  | No  | NA   | 0  | 0              | Not-determined  | Genome-fragment | NA   | 0     |
| S16_extracted_120544     | 1153  | No  | NA   | 0  | 0              | Not-determined  | Genome-fragment | NA   | 0     |
| S16_extracted_120581     | 1127  | No  | NA   | 0  | 1              | Not-determined  | Genome-fragment | NA   | 0     |
| S16_extracted_120658     | 1094  | No  | NA   | 0  | 1              | Not-determined  | Genome-fragment | NA   | 0     |
| S16_extracted_120674     | 1084  | No  | NA   | 0  | 1              | Not-determined  | Genome-fragment | NA   | 0     |
| S16_extracted_120677     | 1438  | No  | NA   | 0  | 1              | Not-determined  | Genome-fragment | NA   | 0     |
| S16_extracted_120687     | 5612  | No  | NA   | 0  | 1              | Not-determined  | Genome-fragment | NA   | 0     |
| S16_extracted_120696     | 5595  | No  | NA   | 0  | 1              | Not-determined  | Genome-fragment | NA   | 0     |
| S5_vs_k141_102885  full  | 2579  | No  | NA   | 0  | 0              | Low-quality     | Genome-fragment | NA   | 4.57  |
| S16_extracted_120783     | 1009  | No  | NA   | 0  | 1              | Not-determined  | Genome-fragment | NA   | 0     |
| S16_extracted_120804     | 1700  | No  | NA   | 0  | 0              | Not-determined  | Genome-fragment | NA   | 0     |
| S7_extracted_129816      | 2579  | No  | NA   | 4  | 0              | Low-quality     | Genome-fragment | NA   | 0     |
| S9_extracted_k141_12811  | 2580  | No  | NA   | 0  | 2              | Low-quality     | Genome-fragment | NA   | 0.64  |
| S16_extracted_120944     | 1195  | No  | NA   | 0  | 1              | Not-determined  | Genome-fragment | NA   | 0     |
| S16_extracted_121013     | 3181  | No  | NA   | 0  | 0              | Not-determined  | Genome-fragment | NA   | 0     |
| S14_vs_k141_73612  full  | 2580  | No  | NA   | 0  | 0              | Low-quality     | Genome-fragment | NA   | 5.11  |
| S1_vs_k141_106513  full  | 2580  | No  | NA   | 0  | 0              | Low-quality     | Genome-fragment | NA   | 4.13  |
| S16_extracted_121222     | 1606  | No  | NA   | 0  | 0              | Not-determined  | Genome-fragment | NA   | 0     |
| S2_vs_k141_95345  full   | 2580  | No  | NA   | 0  | 0              | Low-quality     | Genome-fragment | NA   | 1.85  |
| S5_vs_k141_3516  full    | 2580  | No  | NA   | 0  | 0              | Low-quality     | Genome-fragment | NA   | 6     |
| S16_extracted_121275     | 1085  | No  | NA   | 0  | 1              | Not-determined  | Genome-fragment | NA   | 0     |
| S16_extracted_121278     | 1397  | No  | NA   | 0  | 0              | Not-determined  | Genome-fragment | NA   | 0     |
| S16_extracted_121409     | 1003  | No  | NA   | 0  | 2              | Not-determined  | Genome-fragment | NA   | 0     |
| S16_extracted_121434     | 1100  | No  | NA   | 0  | 0              | Not-determined  | Genome-fragment | NA   | 0     |
| S16_extracted_121540     | 2300  | No  | NA   | 0  | 0              | Not-determined  | Genome-fragment | NA   | 0     |
| S7_vs_114905  full       | 2580  | No  | NA   | 0  | 0              | Low-quality     | Genome-fragment | NA   | 4.03  |
| S8_vs_k141_115812  full  | 2580  | No  | NA   | 0  | 1              | Low-quality     | Genome-fragment | NA   | 6.75  |
| S16_extracted_121887     | 1226  | No  | NA   | 0  | 0              | Not-determined  | Genome-fragment | NA   | 0     |
| S16_extracted_121908     | 1420  | No  | NA   | 0  | 0              | Not-determined  | Genome-fragment | NA   | 0     |
| S16_extracted_121924     | 1200  | No  | NA   | 0  | 2              | Not-determined  | Genome-fragment | NA   | 0     |
| S16_extracted_121956     | 1372  | No  | NA   | 0  | 0              | Not-determined  | Genome-fragment | NA   | 0     |
| S14_vs_k141_97928  full  | 2581  | No  | NA   | 0  | 0              | Low-quality     | Genome-fragment | NA   | 5.29  |
| S16_extracted_122052     | 1146  | No  | NA   | 0  | 1              | Not-determined  | Genome-fragment | NA   | 0     |
| S16_extracted_122137     | 4142  | No  | NA   | 0  | 2              | Not-determined  | Genome-fragment | NA   | 0     |
| S16_extracted_122195     | 1108  | No  | NA   | 0  | 0              | Not-determined  | Genome-fragment | NA   | 0     |
| S16_extracted_122276     | 1221  | No  | NA   | 0  | 2              | Not-determined  | Genome-fragment | NA   | 0     |
| S16_extracted_122306     | 5914  | No  | NA   | 0  | 2              | Not-determined  | Genome-fragment | NA   | 0     |
| S16_extracted_122327     | 1781  | No  | NA   | 0  | 0              | Not-determined  | Genome-fragment | NA   | 0     |
| S16_extracted_122480     | 1284  | No  | NA   | 0  | 1              | Not-determined  | Genome-fragment | NA   | 0     |
| S16_extracted_122502     | 1586  | No  | NA   | 0  | 1              | Not-determined  | Genome-fragment | NA   | 0     |
| S16_extracted_122606     | 6218  | No  | NA   | 0  | 1              | Not-determined  | Genome-fragment | NA   | 0     |
| S7_vs_84519  full        | 2581  | No  | NA   | 0  | 0              | Low-quality     | Genome-fragment | NA   | 5.99  |
| S16_extracted_122646     | 3689  | No  | NA   | 0  | 2              | Not-determined  | Genome-fragment | NA   | 0     |
| S7_vs_94108  full        | 2581  | No  | NA   | 3  | 0              | Low-quality     | Genome-fragment | NA   | 5.51  |
| S16_vs_41220  full       | 2581  | No  | NA   | 0  | 0              | Low-quality     | Genome-fragment | NA   | 6.87  |
| S16_extracted_122808     | 1146  | No  | NA   | 0  | 0              | Not-determined  | Genome-fragment | NA   | 0     |
| S6_vs_k141_16838  full   | 2581  | Yes | 1340 | 1  | 1              | Low-quality     | Genome-fragment | 0.81 | 48.08 |
| S16_extracted_122988     | 1742  | No  | NA   | 0  | 1              | Not-determined  | Genome-fragment | NA   | 0     |
| S16_vs_154070  full      | 2582  | No  | NA   | 0  | 1              | Low-quality     | Genome-fragment | NA   | 2.53  |
| S16_extracted_123152     | 4105  | No  | NA   | 0  | 2              | Not-determined  | Genome-fragment | NA   | 0     |
| S16_extracted_123181     | 1006  | No  | NA   | 0  | 1              | Not-determined  | Genome-fragment | NA   | 0     |
| S17_vs_k141_59474  full  | 2583  | No  |      |    |                |                 |                 |      |       |



|                            |       |    |    |   |                |                 |                 |    |      |
|----------------------------|-------|----|----|---|----------------|-----------------|-----------------|----|------|
| S16_extracted_124565       | 1787  | No | NA | 0 | 1              | Not-determined  | Genome-fragment | NA | 0    |
| S16_extracted_124573       | 1028  | No | NA | 0 | 0              | Not-determined  | Genome-fragment | NA | 0    |
| S16_extracted_124577       | 4102  | No | NA | 0 | 0              | Not-determined  | Genome-fragment | NA | 0    |
| S16_extracted_124744       | 2178  | No | NA | 0 | 2              | Not-determined  | Genome-fragment | NA | 0    |
| S16_extracted_124860       | 1287  | No | NA | 0 | 1              | Not-determined  | Genome-fragment | NA | 0    |
| S3_extracted_k141_96599    | 2585  | No | NA | 1 | 0              | Low-quality     | Genome-fragment | NA | 1.93 |
| S3_extracted_k141_65492    | 2585  | No | NA | 2 | 0              | Low-quality     | Genome-fragment | NA | 11.8 |
| S16_extracted_125183       | 1312  | No | NA | 0 | 0              | Not-determined  | Genome-fragment | NA | 0    |
| S8_vs_k141_12711[full]     | 2585  | No | NA | 0 | 0              | Low-quality     | Genome-fragment | NA | 3.71 |
| S16_extracted_125303       | 5915  | No | NA | 0 | 2              | Not-determined  | Genome-fragment | NA | 0    |
| S8_vs_k141_25504[full]     | 2585  | No | NA | 0 | 1              | Low-quality     | Genome-fragment | NA | 1.26 |
| S13_vs_148341[full]        | 2586  | No | NA | 0 | 0              | Low-quality     | Genome-fragment | NA | 7.31 |
| S16_extracted_125475       | 1111  | No | NA | 0 | 0              | Not-determined  | Genome-fragment | NA | 0    |
| S3_vs_k141_78103[full]     | 2586  | No | NA | 1 | 0              | Low-quality     | Genome-fragment | NA | 5.19 |
| S6_vs_k141_26165[full]     | 2586  | No | NA | 0 | 2              | Low-quality     | Genome-fragment | NA | 2.07 |
| S8_vs_k141_48074[In2gene]  | 2586  | No | NA | 0 | 1              | Not-determined  | Genome-fragment | NA | 2.33 |
| S9_vs_k141_64649[full]     | 2587  | No | NA | 0 | 1              | Low-quality     | Genome-fragment | NA | 5.12 |
| S16_extracted_125868       | 2627  | No | NA | 0 | 1              | Not-determined  | Genome-fragment | NA | 0    |
| S16_extracted_125897       | 1000  | No | NA | 0 | 0              | Not-determined  | Genome-fragment | NA | 0    |
| S16_extracted_126030       | 1636  | No | NA | 0 | 1              | Not-determined  | Genome-fragment | NA | 0    |
| S16_extracted_126050       | 3310  | No | NA | 0 | 1              | Not-determined  | Genome-fragment | NA | 0    |
| S16_extracted_126221       | 1302  | No | NA | 0 | 1              | Not-determined  | Genome-fragment | NA | 0    |
| S9_vs_k141_30647[full]     | 2587  | No | NA | 0 | 0              | Low-quality     | Genome-fragment | NA | 4.25 |
| S16_extracted_126407       | 1051  | No | NA | 0 | 1              | Not-determined  | Genome-fragment | NA | 0    |
| S16_extracted_126431       | 4602  | No | NA | 0 | 3              | Not-determined  | Genome-fragment | NA | 0    |
| S16_extracted_48607        | 2587  | No | NA | 0 | 0              | Low-quality     | Genome-fragment | NA | 4.48 |
| S16_extracted_126748       | 7178  | No | NA | 0 | 0              | Not-determined  | Genome-fragment | NA | 0    |
| S13_extracted_111086       | 2588  | No | NA | 1 | 0              | Low-quality     | Genome-fragment | NA | 3.89 |
| S16_extracted_126814       | 1259  | No | NA | 1 | 1              | Not-determined  | Genome-fragment | NA | 0    |
| S14_vs_k141_50390[full]    | 2588  | No | NA | 0 | 0              | Low-quality     | Genome-fragment | NA | 4.84 |
| S5_vs_k141_12833[full]     | 2588  | No | NA | 6 | 0              | Low-quality     | Genome-fragment | NA | 6.16 |
| S16_extracted_126997       | 4842  | No | NA | 1 | Not-determined | Genome-fragment | NA              | 0  |      |
| S12_vs_k141_131017[full]   | 2588  | No | NA | 4 | 0              | Low-quality     | Genome-fragment | NA | 6.75 |
| S16_extracted_127098       | 1506  | No | NA | 0 | 0              | Not-determined  | Genome-fragment | NA | 0    |
| S16_extracted_127169       | 2385  | No | NA | 0 | 2              | Not-determined  | Genome-fragment | NA | 0    |
| S16_extracted_127315       | 1373  | No | NA | 0 | 0              | Not-determined  | Genome-fragment | NA | 0    |
| S16_extracted_127320       | 1486  | No | NA | 0 | 2              | Not-determined  | Genome-fragment | NA | 0    |
| S16_extracted_127352       | 3751  | No | NA | 0 | 2              | Not-determined  | Genome-fragment | NA | 0    |
| S16_extracted_127386       | 1214  | No | NA | 0 | 2              | Not-determined  | Genome-fragment | NA | 0    |
| S16_extracted_127612       | 1629  | No | NA | 0 | 1              | Not-determined  | Genome-fragment | NA | 0    |
| S16_extracted_127632       | 7650  | No | NA | 0 | 5              | Not-determined  | Genome-fragment | NA | 0    |
| S16_extracted_127673       | 1625  | No | NA | 0 | 1              | Not-determined  | Genome-fragment | NA | 0    |
| S16_extracted_127762       | 3142  | No | NA | 0 | 4              | Not-determined  | Genome-fragment | NA | 0    |
| S14_extracted_k141_61173   | 2589  | No | NA | 3 | 0              | Low-quality     | Genome-fragment | NA | 8.55 |
| S16_extracted_127844       | 1146  | No | NA | 0 | 1              | Not-determined  | Genome-fragment | NA | 0    |
| S16_extracted_127886       | 1860  | No | NA | 0 | 3              | Not-determined  | Genome-fragment | NA | 0    |
| S16_extracted_127963       | 1396  | No | NA | 0 | 0              | Not-determined  | Genome-fragment | NA | 0    |
| S16_extracted_128082       | 1052  | No | NA | 0 | 0              | Not-determined  | Genome-fragment | NA | 0    |
| S3_vs_k141_105455[full]    | 2589  | No | NA | 0 | 1              | Low-quality     | Genome-fragment | NA | 0.82 |
| S5_vs_k141_45348[full]     | 2589  | No | NA | 4 | 0              | Low-quality     | Genome-fragment | NA | 1.91 |
| S16_extracted_128270       | 1907  | No | NA | 0 | 0              | Not-determined  | Genome-fragment | NA | 0    |
| S16_extracted_128232       | 1429  | No | NA | 0 | 0              | Not-determined  | Genome-fragment | NA | 0    |
| S16_extracted_128335       | 2490  | No | NA | 0 | 4              | Not-determined  | Genome-fragment | NA | 0    |
| S16_extracted_128336       | 1291  | No | NA | 0 | 0              | Not-determined  | Genome-fragment | NA | 0    |
| S16_vs_19589[full]         | 2589  | No | NA | 0 | 0              | Low-quality     | Genome-fragment | NA | 4.48 |
| S2_vs_k141_108341[In2gene] | 2589  | No | NA | 2 | 0              | Low-quality     | Genome-fragment | NA | 2.86 |
| S16_extracted_128479       | 9274  | No | NA | 0 | 5              | Not-determined  | Genome-fragment | NA | 0    |
| S16_extracted_128524       | 1768  | No | NA | 0 | 2              | Not-determined  | Genome-fragment | NA | 0    |
| S16_extracted_128544       | 5268  | No | NA | 0 | 2              | Not-determined  | Genome-fragment | NA | 0    |
| S16_extracted_128598       | 1488  | No | NA | 0 | 2              | Not-determined  | Genome-fragment | NA | 0    |
| S16_extracted_128768       | 7011  | No | NA | 0 | 6              | Not-determined  | Genome-fragment | NA | 0    |
| S16_extracted_128814       | 1200  | No | NA | 0 | 1              | Not-determined  | Genome-fragment | NA | 0    |
| S16_extracted_128829       | 15514 | No | NA | 0 | 26             | Not-determined  | Genome-fragment | NA | 0    |
| S16_extracted_128834       | 1865  | No | NA | 0 | 1              | Not-determined  | Genome-fragment | NA | 0    |
| S16_extracted_128894       | 1176  | No | NA | 0 | 1              | Not-determined  | Genome-fragment | NA | 0    |
| S16_extracted_128916       | 1063  | No | NA | 0 | 1              | Not-determined  | Genome-fragment | NA | 0    |
| S16_extracted_128920       | 1760  | No | NA | 0 | 1              | Not-determined  | Genome-fragment | NA | 0    |
| S9_vs_k141_76216[full]     | 2590  | No | NA | 2 | 0              | Low-quality     | Genome-fragment | NA | 3.96 |
| S14_vs_k141_69206[full]    | 2590  | No | NA | 0 | 0              | Low-quality     | Genome-fragment | NA | 4.03 |
| S16_extracted_129175       | 2549  | No | NA | 0 | 1              | Not-determined  | Genome-fragment | NA | 0    |
| S16_extracted_129206       | 9831  | No | NA | 0 | 3              | Not-determined  | Genome-fragment | NA | 0    |
| S16_extracted_129284       | 1030  | No | NA | 0 | 0              | Not-determined  | Genome-fragment | NA | 0    |
| S14_vs_k141_86476[full]    | 2591  | No | NA | 0 | 0              | Low-quality     | Genome-fragment | NA | 4.07 |
| S16_extracted_129404       | 4518  | No | NA | 0 | 4              | Not-determined  | Genome-fragment | NA | 0    |
| S16_extracted_129528       | 1700  | No | NA | 0 | 1              | Not-determined  | Genome-fragment | NA | 0    |
| S16_extracted_129629       | 3502  | No | NA | 0 | 3              | Not-determined  | Genome-fragment | NA | 0    |
| S16_extracted_129641       | 11864 | No | NA | 0 | 8              | Not-determined  | Genome-fragment | NA | 0    |
| S3_extracted_k141_69638    | 2591  | No | NA | 0 | 1              | Low-quality     | Genome-fragment | NA | 0.7  |
| S16_extracted_129715       | 6356  | No | NA | 0 | 0              | Not-determined  | Genome-fragment | NA | 0    |
| S8_extracted_k141_999875   | 2592  | No | NA | 0 | 1              | Low-quality     | Genome-fragment | NA | 1.57 |
| S16_extracted_129769       | 3047  | No | NA | 0 | 2              | Not-determined  | Genome-fragment | NA | 0    |
| S16_extracted_129777       | 1287  | No | NA | 0 | 1              | Not-determined  | Genome-fragment | NA | 0    |
| S16_extracted_129839       | 2120  | No | NA | 0 | 1              | Not-determined  | Genome-fragment | NA | 0    |
| S16_extracted_130052       | 4689  | No | NA | 0 | 6              | Not-determined  | Genome-fragment | NA | 0    |
| S16_extracted_130216       | 3695  | No | NA | 0 | 1              | Not-determined  | Genome-fragment | NA | 0    |
| S16_extracted_130280       | 1211  | No | NA | 0 | 2              | Not-determined  | Genome-fragment | NA | 0    |
| S16_extracted_130389       | 1039  | No | NA | 0 | 0              | Not-determined  | Genome-fragment | NA | 0    |
| S16_extracted_130428       | 4705  | No | NA | 0 | 0              | Not-determined  | Genome-fragment | NA | 0    |
| S17_vs_k141_481781[full]   | 2593  | No | NA | 0 | 0              | Low-quality     | Genome-fragment | NA | 1.5  |
| S16_extracted_130602       | 6409  | No | NA | 0 | 3              | Not-determined  | Genome-fragment | NA | 0    |
| S9_vs_k141_46371[full]     | 2593  | No | NA | 1 | 0              | Low-quality     | Genome-fragment | NA | 5.75 |
| S14_vs_k141_51141[full]    | 2593  | No | NA | 0 | 0              | Low-quality     | Genome-fragment | NA | 5.56 |
| S16_extracted_130732       | 1193  | No | NA | 0 | 0              | Not-determined  | Genome-fragment | NA | 0    |
| S1_vs_k141_50141[full]     | 2593  | No | NA | 1 | 0              | Low-quality     | Genome-fragment | NA | 1.63 |
| S16_extracted_130906       | 1489  | No | NA | 0 | 2              | Not-determined  | Genome-fragment | NA | 0    |
| S16_extracted_130923       | 9787  | No | NA | 0 | 5              | Not-determined  | Genome-fragment | NA | 0    |
| S16_extracted_130978       | 1091  | No | NA | 0 | 1              | Not-determined  | Genome-fragment | NA | 0    |
| S7_vs_112443[In2gene]      | 2593  | No | NA | 2 | 0              | Low-quality     | Genome-fragment | NA | 5.59 |
| S16_extracted_131200       | 1367  | No | NA | 0 | 0              | Not-determined  | Genome-fragment | NA | 0    |
| S8_extracted_k141_202318   | 2593  | No | NA | 0 | 0              | Low-quality     | Genome-fragment | NA | 1.14 |
| S16_extracted_131338       | 1171  | No | NA | 0 | 0              | Not-determined  | Genome-fragment | NA | 0    |
| S16_extracted_131367       | 1204  | No | NA | 0 | 1              | Not-determined  | Genome-fragment | NA | 0    |
| S16_extracted_131377       | 1232  | No | NA | 0 | 2              | Not-determined  | Genome-fragment | NA | 0    |
| S16_extracted_131422       | 1948  | No | NA | 0 | 1              | Not-determined  | Genome-fragment | NA | 0    |
| S5_vs_k141_30749[full]     | 2594  | No | NA | 0 | 0              | Low-quality     | Genome-fragment | NA | 0.47 |
| S16_extracted_131476       | 1001  | No | NA | 0 | 1              | Not-determined  | Genome-fragment | NA | 0    |
| S16_extracted_131589       | 3180  | No | NA | 0 | 2              | Not-determined  | Genome-fragment | NA | 0    |
| S16_extracted_131714       | 1783  | No | NA | 0 | 1              | Not-determined  | Genome-fragment | NA | 0    |
| S16_extracted_131749       | 2671  | No | NA | 0 | 1              | Not-determined  | Genome-fragment | NA | 0    |
| S16_extracted_131828       | 1796  | No | NA | 0 | 0              | Not-determined  | Genome-fragment | NA | 0    |
| S16_extracted_131856       | 1093  | No | NA | 0 | 2              | Not-determined  | Genome-fragment | NA | 0    |
| S5_vs_k141_135864[full]    | 2594  | No | NA | 0 | 0              | Low-quality     | Genome-fragment | NA | 6.54 |
| S7_vs_125946[full]         | 2594  | No | NA | 0 | 0              | Low-quality     | Genome-fragment | NA | 4.72 |
| S11_vs_k141_144931[full]   | 2595  | No | NA | 0 | 2              | Low-quality     | Genome-fragment | NA | 3.17 |
| S14_vs_k141_351151[full]   | 2595  | No | NA | 0 | 1              | Low-quality     | Genome-fragment | NA | 4.84 |
| S16_extracted_131969       | 1606  | No | NA | 0 | 1              | Not-determined  | Genome-fragment | NA | 0    |
| S16_extracted_132258       | 1250  | No | NA | 0 | 0              | Not-determined  | Genome-fragment | NA | 0    |
| S5_vs_k141_129121[full]    | 2595  | No | NA | 0 | 2              | Low-quality     | Genome-fragment | NA | 1.13 |
| S16_extracted_131882       | 1023  | No | NA | 0 | 0              | Not-determined  | Genome-fragment | NA | 0    |
| S16_extracted_132898       | 6702  | No | NA | 0 | 0              | Not-determined  | Genome-fragment | NA | 0    |
| S15_vs_186201[full]        | 2595  | No | NA | 0 | 3              | Low-quality     | Genome-fragment | NA | 2.66 |
| S16_extracted_132890       | 2649  | No | NA | 0 | 2              | Not-determined  | Genome-fragment | NA | 0    |
| S16_extracted_133017       | 2292  | No | NA | 0 | 3              | Not-determined  | Genome-fragment | NA | 0    |
| S16_extracted_133066       | 6619  | No | NA | 0 | 4              | Not-determined  | Genome-fragment | NA | 0    |
| S16_extracted_133155       | 2744  | No | NA | 0 | 2              | Not-determined  | Genome-fragment | NA | 0    |
| S9_vs_k141_46491[full]     | 2596  | No | NA | 3 | 0              | Low-quality     | Genome-fragment | NA | 6.4  |
| S16_extracted_133342       | 1892  | No | NA | 0 | 0              | Not-determined  | Genome-fragment | NA | 0    |
| S16_extracted_133347       | 1201  | No | NA | 0 | 0              | Not-determined  | Genome-fragment | NA | 0    |
| S16_extracted_133448       | 1196  | No | NA | 0 | 2              | Not-determined  | Genome-fragment | NA | 0    |
| S16_extracted_133499       | 1010  | No | NA | 0 | 1              | Not-determined  | Genome-fragment | NA | 0    |
| S16_extracted_133588       | 2115  | No | NA | 0 | 2              | Not-determined  | Genome-fragment | NA | 0    |
| S16_extracted_133688       | 4714  | No | NA | 0 | 1              | Not-determined  | Genome-fragment | NA | 0    |
| S10_vs_66700[full]         | 2596  | No | NA | 0 | 0              | Low-quality     | Genome-fragment | NA | 1.06 |
| S16_extracted_133801       | 1231  | No | NA | 0 | 1              | Not-determined  | Genome-fragment | NA | 0    |
| S16_extracted_133862       | 1148  | No | NA | 0 | 1              | Not-determined  | Genome-fragment | NA | 0    |
| S16_extracted_133863       | 2086  | No | NA | 0 | 0              | Not-determined  | Genome-fragment | NA | 0    |
| S16_extracted_133880       | 1092  | No | NA | 0 | 0              | Not-determined  | Genome-fragment | NA | 0    |
| S16_extracted_134243       | 1587  | No | NA | 0 | 0              | Not-determined  | Genome-fragment | NA | 0    |
| S16_extracted_134271       | 2259  | No | NA | 0 | 3              | Not-determined  | Genome-fragment | NA | 0    |
| S10_vs_109569[full]        | 2596  | No | NA | 0 | 0              | Low-quality     | Genome-fragment | NA | 0.86 |
| S16_extracted_134622       | 2601  | No | NA | 0 | 0              | Not-determined  | Genome-fragment | NA | 0    |
| S6_vs_k141_15511[full]     | 2596  | No | NA | 0 | 1              | Low-quality     | Genome-fragment | NA | 4.51 |
| S16_extracted_134975       | 1167  | No | NA | 0 | 0              | Not-determined  | Genome-fragment | NA | 0    |
| S14_vs_k141_68668[full]    | 2597  | No | NA | 2 | 0              | Low-quality     | Genome-fragment | NA | 6.83 |
| S16_extracted_135057       | 1045  | No | NA | 0 | 1              | Not-determined  | Genome-fragment | NA | 0    |
| S16_vs_83928[full]         | 2597  | No | NA | 1 | 0              | Low-quality     | Genome-fragment | NA | 4.02 |
| S16_extracted_135791       | 1399  | No | NA | 0 | 0              | Not-determined  | Genome-fragment | NA | 0    |
| S16_extracted_135796       | 1332  | No | NA | 0 | 0              | Not-determined  | Genome-fragment | NA | 0    |
| S16_extracted_135          |       |    |    |   |                |                 |                 |    |      |



|                           |       |     |    |      |    |                |                 |    |       |       |
|---------------------------|-------|-----|----|------|----|----------------|-----------------|----|-------|-------|
| S16_extracted_138140      | 1141  | No  | NA | 0    | 1  | Not-determined | Genome-fragment | NA |       | 0     |
| S14_vs_k141_228931[full]  | 2599  | No  | NA | 0    | 1  | Low-quality    | Genome-fragment | NA | 4.89  | 0     |
| S16_extracted_138477      | 1009  | No  | NA | 0    | 2  | Not-determined | Genome-fragment | NA |       | 0     |
| S16_extracted_138493      | 10670 | No  | NA | 0    | 3  | Not-determined | Genome-fragment | NA |       | 0     |
| S8_vs_k141_197771[full]   | 2599  | No  | NA | 1    | 0  | Low-quality    | Genome-fragment | NA | 5.76  | 0     |
| S16_extracted_138642      | 2085  | No  | NA | 0    | 1  | Not-determined | Genome-fragment | NA |       | 0     |
| S16_extracted_138652      | 3548  | No  | NA | 0    | 4  | Not-determined | Genome-fragment | NA |       | 0     |
| S16_extracted_138717      | 1144  | No  | NA | 0    | 1  | Not-determined | Genome-fragment | NA |       | 0     |
| S8_extracted_k141_131849  | 2600  | No  | NA | 0    | 0  | Low-quality    | Genome-fragment | NA | 8.08  | 0     |
| S16_extracted_138812      | 1011  | No  | NA | 0    | 1  | Not-determined | Genome-fragment | NA |       | 0     |
| S17_extracted_k141_151034 | 2601  | No  | NA | 0    | 0  | Low-quality    | Genome-fragment | NA | 1.43  | 0     |
| S9_vs_k141_137801[full]   | 2601  | No  | NA | 0    | 0  | Low-quality    | Genome-fragment | NA | 3.69  | 0     |
| S16_extracted_138954      | 1041  | No  | NA | 0    | 0  | Not-determined | Genome-fragment | NA |       | 0     |
| S3_vs_k141_16761[full]    | 2601  | No  | NA | 0    | 0  | Low-quality    | Genome-fragment | NA | 4.48  | 0     |
| S16_extracted_139188      | 5254  | No  | NA | 0    | 3  | Not-determined | Genome-fragment | NA |       | 0     |
| S16_extracted_139189      | 3000  | No  | NA | 0    | 1  | Not-determined | Genome-fragment | NA |       | 0     |
| S16_extracted_139196      | 1355  | No  | NA | 0    | 1  | Not-determined | Genome-fragment | NA |       | 0     |
| S7_vs_888571[full]        | 2601  | No  | NA | 1    | 0  | Low-quality    | Genome-fragment | NA | 6.23  | 0     |
| S9_extracted_k141_26271   | 2602  | No  | NA | 2    | 0  | Low-quality    | Genome-fragment | NA | 42.39 | 0     |
| S16_extracted_139353      | 1602  | No  | NA | 0    | 1  | Not-determined | Genome-fragment | NA |       | 0     |
| S16_extracted_139441      | 1613  | No  | NA | 0    | 2  | Not-determined | Genome-fragment | NA |       | 0     |
| S16_extracted_139560      | 1155  | No  | NA | 0    | 0  | Not-determined | Genome-fragment | NA |       | 0     |
| S16_extracted_139613      | 1328  | No  | NA | 0    | 1  | Not-determined | Genome-fragment | NA |       | 0     |
| S16_extracted_139720      | 1885  | No  | NA | 0    | 0  | Not-determined | Genome-fragment | NA |       | 0     |
| S16_extracted_139763      | 1340  | No  | NA | 0    | 0  | Not-determined | Genome-fragment | NA |       | 0     |
| S16_extracted_139798      | 1320  | No  | NA | 0    | 1  | Not-determined | Genome-fragment | NA |       | 0     |
| S16_extracted_139809      | 1131  | No  | NA | 0    | 1  | Not-determined | Genome-fragment | NA |       | 0     |
| S16_extracted_139859      | 1511  | No  | NA | 0    | 1  | Not-determined | Genome-fragment | NA |       | 0     |
| S14_vs_k141_552751[full]  | 2602  | No  | NA | 0    | 0  | Low-quality    | Genome-fragment | NA | 6.02  | 0     |
| S16_extracted_139885      | 1742  | No  | NA | 0    | 1  | Not-determined | Genome-fragment | NA |       | 0     |
| S16_extracted_139944      | 5405  | No  | NA | 0    | 3  | Not-determined | Genome-fragment | NA |       | 0     |
| S8_vs_k141_104411[full]   | 2602  | No  | NA | 0    | 0  | Low-quality    | Genome-fragment | NA | 4.53  | 0     |
| S16_extracted_140029      | 2002  | No  | NA | 0    | 1  | Not-determined | Genome-fragment | NA |       | 0     |
| S16_extracted_140164      | 2174  | No  | NA | 0    | 1  | Not-determined | Genome-fragment | NA |       | 0     |
| S16_extracted_140224      | 2486  | No  | NA | 0    | 2  | Not-determined | Genome-fragment | NA |       | 0     |
| S8_vs_k141_1361451[full]  | 2602  | No  | NA | 0    | 1  | Low-quality    | Genome-fragment | NA | 3.93  | 0     |
| S14_extracted_k141_10660  | 2603  | No  | NA | 1    | 0  | Low-quality    | Genome-fragment | NA | 4.51  | 0     |
| S16_extracted_140398      | 14341 | No  | NA | 0    | 5  | Not-determined | Genome-fragment | NA |       | 0     |
| S16_extracted_140440      | 1019  | No  | NA | 0    | 1  | Not-determined | Genome-fragment | NA |       | 0     |
| S7_vs_392621[full]        | 2603  | No  | NA | 0    | 1  | Low-quality    | Genome-fragment | NA | 6.8   | 0     |
| S16_extracted_140455      | 1055  | No  | NA | 0    | 0  | Not-determined | Genome-fragment | NA |       | 0     |
| S16_extracted_140471      | 1487  | No  | NA | 0    | 2  | Not-determined | Genome-fragment | NA |       | 0     |
| S16_extracted_140502      | 1092  | No  | NA | 0    | 0  | Not-determined | Genome-fragment | NA |       | 0     |
| S16_extracted_140540      | 1318  | No  | NA | 0    | 0  | Not-determined | Genome-fragment | NA |       | 0     |
| S16_extracted_140583      | 9674  | No  | NA | 0    | 6  | Not-determined | Genome-fragment | NA |       | 0     |
| S16_extracted_81355       | 2603  | No  | NA | 0    | 0  | Low-quality    | Genome-fragment | NA | 8.51  | 0     |
| S16_extracted_140685      | 1227  | No  | NA | 0    | 0  | Not-determined | Genome-fragment | NA |       | 0     |
| S16_extracted_140708      | 1155  | No  | NA | 0    | 2  | Not-determined | Genome-fragment | NA |       | 0     |
| S16_extracted_140727      | 1392  | No  | NA | 0    | 0  | Not-determined | Genome-fragment | NA |       | 0     |
| S16_extracted_140760      | 2139  | No  | NA | 0    | 1  | Not-determined | Genome-fragment | NA |       | 0     |
| S16_extracted_140778      | 1075  | No  | NA | 0    | 0  | Not-determined | Genome-fragment | NA |       | 0     |
| S16_extracted_140910      | 2752  | No  | NA | 0    | 2  | Not-determined | Genome-fragment | NA |       | 0     |
| S16_extracted_141105      | 1785  | No  | NA | 0    | 2  | Not-determined | Genome-fragment | NA |       | 0     |
| S16_extracted_141147      | 3225  | No  | NA | 0    | 3  | Not-determined | Genome-fragment | NA |       | 0     |
| S16_extracted_141241      | 7847  | No  | NA | 0    | 14 | Not-determined | Genome-fragment | NA |       | 0     |
| S16_extracted_141265      | 2781  | No  | NA | 0    | 1  | Not-determined | Genome-fragment | NA |       | 0     |
| S16_extracted_141531      | 1252  | No  | NA | 0    | 1  | Not-determined | Genome-fragment | NA |       | 0     |
| S16_extracted_141535      | 3562  | No  | NA | 0    | 1  | Not-determined | Genome-fragment | NA |       | 0     |
| S10_vs_58671[full]        | 2603  | No  | NA | 0    | 0  | Low-quality    | Genome-fragment | NA | 4.54  | 0     |
| S16_extracted_141659      | 5292  | No  | NA | 0    | 1  | Not-determined | Genome-fragment | NA |       | 0     |
| S12_vs_k141_1504131[full] | 2603  | Yes | NA | 1    | 1  | Low-quality    | Genome-fragment | NA | 1.94  | 37.42 |
| S16_extracted_141896      | 1157  | No  | NA | 1629 | 1  | Not-determined | Genome-fragment | NA | 0     | 0     |
| S8_vs_k141_1182111[full]  | 2603  | No  | NA | 0    | 2  | Low-quality    | Genome-fragment | NA | 2.5   | 0     |
| S8_vs_k141_73741[full]    | 2603  | No  | NA | 1    | 0  | Low-quality    | Genome-fragment | NA | 5.32  | 0     |
| S16_extracted_142140      | 1674  | No  | NA | 0    | 0  | Not-determined | Genome-fragment | NA |       | 0     |
| S16_extracted_80593       | 2604  | No  | NA | 2    | 0  | Low-quality    | Genome-fragment | NA | 4.19  | 0     |
| S16_extracted_142217      | 2196  | No  | NA | 0    | 0  | Not-determined | Genome-fragment | NA |       | 0     |
| S16_extracted_142280      | 1000  | No  | NA | 0    | 2  | Not-determined | Genome-fragment | NA |       | 0     |
| S16_extracted_142299      | 4688  | No  | NA | 0    | 0  | Not-determined | Genome-fragment | NA |       | 0     |
| S16_extracted_142342      | 2395  | No  | NA | 0    | 0  | Not-determined | Genome-fragment | NA |       | 0     |
| S16_extracted_142376      | 2056  | No  | NA | 0    | 3  | Not-determined | Genome-fragment | NA |       | 0     |
| S12_vs_k141_526231[full]  | 2604  | No  | NA | 0    | 0  | Low-quality    | Genome-fragment | NA | 3.5   | 0     |
| S15_vs_640271[full]       | 2605  | No  | NA | 0    | 0  | Low-quality    | Genome-fragment | NA | 1.32  | 0     |
| S16_extracted_142435      | 1100  | No  | NA | 0    | 0  | Not-determined | Genome-fragment | NA |       | 0     |
| S16_extracted_142483      | 1605  | No  | NA | 0    | 0  | Not-determined | Genome-fragment | NA |       | 0     |
| S16_extracted_142485      | 1269  | No  | NA | 0    | 2  | Not-determined | Genome-fragment | NA |       | 0     |
| S10_vs_459781[full]       | 2606  | No  | NA | 0    | 0  | Low-quality    | Genome-fragment | NA | 2.39  | 0     |
| S9_vs_k141_409281[full]   | 2607  | No  | NA | 0    | 0  | Low-quality    | Genome-fragment | NA | 1.63  | 0     |
| S16_extracted_142640      | 1011  | No  | NA | 0    | 0  | Not-determined | Genome-fragment | NA |       | 0     |
| S14_vs_k141_92291[full]   | 2607  | No  | NA | 7    | 0  | Low-quality    | Genome-fragment | NA | 8.58  | 0     |
| S16_extracted_142850      | 3747  | No  | NA | 0    | 0  | Not-determined | Genome-fragment | NA |       | 0     |
| S1_extracted_k141_140234  | 2607  | No  | NA | 0    | 0  | Low-quality    | Genome-fragment | NA | 1.4   | 0     |
| S16_extracted_142961      | 1572  | No  | NA | 0    | 0  | Not-determined | Genome-fragment | NA |       | 0     |
| S16_extracted_143017      | 1085  | No  | NA | 0    | 1  | Not-determined | Genome-fragment | NA |       | 0     |
| S16_extracted_143181      | 1539  | No  | NA | 0    | 0  | Not-determined | Genome-fragment | NA |       | 0     |
| S16_extracted_143259      | 1241  | No  | NA | 0    | 0  | Not-determined | Genome-fragment | NA |       | 0     |
| S16_extracted_143260      | 9656  | No  | NA | 0    | 7  | Not-determined | Genome-fragment | NA |       | 0     |
| S16_extracted_143275      | 5156  | No  | NA | 0    | 1  | Not-determined | Genome-fragment | NA |       | 0     |
| S16_extracted_143286      | 1520  | No  | NA | 0    | 1  | Not-determined | Genome-fragment | NA |       | 0     |
| S16_extracted_143346      | 1568  | No  | NA | 0    | 1  | Not-determined | Genome-fragment | NA |       | 0     |
| S16_extracted_143408      | 5306  | No  | NA | 0    | 3  | Not-determined | Genome-fragment | NA |       | 0     |
| S16_extracted_143410      | 3489  | No  | NA | 0    | 1  | Not-determined | Genome-fragment | NA |       | 0     |
| S7_vs_881951[full]        | 2607  | No  | NA | 3    | 0  | Low-quality    | Genome-fragment | NA | 7.61  | 0     |
| S16_extracted_143448      | 1470  | No  | NA | 0    | 0  | Not-determined | Genome-fragment | NA |       | 0     |
| S12_extracted_k141_85714  | 2607  | No  | NA | 0    | 0  | Low-quality    | Genome-fragment | NA | 14.27 | 0     |
| S8_vs_k141_876831[full]   | 2607  | No  | NA | 2    | 0  | Low-quality    | Genome-fragment | NA | 6.54  | 0     |
| S9_vs_k141_821851[full]   | 2608  | No  | NA | 3    | 0  | Low-quality    | Genome-fragment | NA | 6.22  | 0     |
| S16_extracted_143767      | 1108  | No  | NA | 0    | 1  | Not-determined | Genome-fragment | NA |       | 0     |
| S16_extracted_143784      | 1101  | No  | NA | 0    | 1  | Not-determined | Genome-fragment | NA |       | 0     |
| S16_extracted_143797      | 1395  | No  | NA | 0    | 2  | Not-determined | Genome-fragment | NA |       | 0     |
| S7_vs_865511[full]        | 2608  | No  | NA | 1    | 0  | Low-quality    | Genome-fragment | NA | 6.02  | 0     |
| S16_extracted_143984      | 3158  | No  | NA | 1    | 0  | Not-determined | Genome-fragment | NA |       | 0     |
| S1_extracted_k141_132859  | 2609  | No  | NA | 0    | 1  | Low-quality    | Genome-fragment | NA | 2.32  | 0     |
| S16_extracted_144195      | 1090  | No  | NA | 0    | 1  | Not-determined | Genome-fragment | NA |       | 0     |
| S16_extracted_144234      | 1319  | No  | NA | 0    | 0  | Not-determined | Genome-fragment | NA |       | 0     |
| S7_vs_1005551[full]       | 2609  | No  | NA | 0    | 0  | Low-quality    | Genome-fragment | NA | 6.7   | 0     |
| S16_extracted_144352      | 15759 | No  | NA | 0    | 3  | Not-determined | Genome-fragment | NA |       | 0     |
| S16_extracted_144395      | 1209  | No  | NA | 0    | 0  | Not-determined | Genome-fragment | NA |       | 0     |
| S16_extracted_144406      | 3692  | No  | NA | 0    | 1  | Not-determined | Genome-fragment | NA |       | 0     |
| S16_extracted_144562      | 5618  | No  | NA | 0    | 3  | Not-determined | Genome-fragment | NA |       | 0     |
| S16_extracted_144565      | 1432  | No  | NA | 0    | 1  | Not-determined | Genome-fragment | NA |       | 0     |
| S6_extracted_k141_46156   | 2609  | No  | NA | 0    | 0  | Low-quality    | Genome-fragment | NA | 3.81  | 0     |
| S9_vs_k141_819961[full]   | 2610  | No  | NA | 4    | 0  | Low-quality    | Genome-fragment | NA | 3.65  | 0     |
| S16_extracted_144748      | 1271  | No  | NA | 0    | 2  | Not-determined | Genome-fragment | NA |       | 0     |
| S1_vs_k141_1521101[full]  | 2610  | No  | NA | 0    | 0  | Low-quality    | Genome-fragment | NA | 1.4   | 0     |
| S16_extracted_144920      | 1409  | No  | NA | 0    | 1  | Not-determined | Genome-fragment | NA |       | 0     |
| S16_extracted_145119      | 1723  | No  | NA | 0    | 1  | Not-determined | Genome-fragment | NA |       | 0     |
| S7_extracted_132883       | 2610  | No  | NA | 0    | 2  | Low-quality    | Genome-fragment | NA | 0.7   | 0     |
| S16_extracted_145173      | 1156  | No  | NA | 0    | 1  | Not-determined | Genome-fragment | NA |       | 0     |
| S16_extracted_145273      | 1152  | No  | NA | 0    | 1  | Not-determined | Genome-fragment | NA |       | 0     |
| S16_extracted_145338      | 4983  | No  | NA | 0    | 3  | Not-determined | Genome-fragment | NA |       | 0     |
| S8_extracted_k141_68343   | 2610  | No  | NA | 0    | 0  | Low-quality    | Genome-fragment | NA | 2.12  | 0     |
| S16_extracted_145421      | 11778 | No  | NA | 0    | 7  | Not-determined | Genome-fragment | NA |       | 0     |
| S16_extracted_145467      | 1634  | No  | NA | 0    | 1  | Not-determined | Genome-fragment | NA |       | 0     |
| S16_extracted_145478      | 9106  | No  | NA | 0    | 4  | Not-determined | Genome-fragment | NA |       | 0     |
| S16_extracted_145514      | 1599  | No  | NA | 0    | 1  | Not-determined | Genome-fragment | NA |       | 0     |
| S16_extracted_145526      | 3123  | No  | NA | 0    | 1  | Not-determined | Genome-fragment | NA |       | 0     |
| S8_vs_k141_117051[full]   | 2610  | No  | NA | 0    | 0  | Low-quality    | Genome-fragment | NA | 4.29  | 0     |
| S17_vs_k141_1099361[full] | 2611  | No  | NA | 0    | 0  | Low-quality    | Genome-fragment | NA | 2.29  | 0     |
| S16_extracted_145695      | 1000  | No  | NA | 0    | 0  | Not-determined | Genome-fragment | NA |       | 0     |
| S16_extracted_145820      | 1540  | No  | NA | 0    | 1  | Not-determined | Genome-fragment | NA |       | 0     |
| S16_extracted_145925      | 1387  | No  | NA | 0    | 2  | Not-determined | Genome-fragment | NA |       | 0     |
| S16_extracted_145989      | 1181  | No  | NA | 0    | 1  | Not-determined | Genome-fragment | NA |       | 0     |
| S5_vs_k141_163601[full]   | 2611  | No  | NA | 3    | 0  | Low-quality    | Genome-fragment | NA | 7.1   | 0     |
| S16_extracted_146024      | 3000  | No  | NA | 0    | 1  | Not-determined | Genome-fragment | NA | 0     | 0     |
| S3_vs_k141_960401[full]   | 2612  | Yes | NA | 592  | 2  | Low-quality    | Genome-fragment | NA | 1.02  | 77.34 |
| S16_extracted_146181      | 1457  | No  | NA | 0    | 0  | Not-determined | Genome-fragment | NA |       | 0     |
| S16_extracted_146214      | 1245  | No  | NA | 0    | 0  | Not-determined | Genome-fragment | NA |       | 0     |
| S16_extracted_146244      | 5117  | No  | NA | 0    | 5  | Not-determined | Genome-fragment | NA |       | 0     |
| S16_extracted_146357      | 1003  | No  | NA | 0    | 0  | Not-determined | Genome-fragment | NA |       | 0     |
| S2_vs_k141_70281          |       |     |    |      |    |                |                 |    |       |       |



|                           |       |    |     |    |   |                |                 |      |       |
|---------------------------|-------|----|-----|----|---|----------------|-----------------|------|-------|
| S16_extracted_148835      | 1032  | No | NA  | 0  | 2 | Not-determined | Genome-fragment | NA   | 0     |
| S16_extracted_148906      | 5711  | No | NA  | 0  | 1 | Not-determined | Genome-fragment | NA   | 0     |
| S16_extracted_148946      | 1503  | No | NA  | 0  | 0 | Not-determined | Genome-fragment | NA   | 0     |
| S7_vs_38728[ full]        | 2614  | No | NA  | 0  | 0 | Low-quality    | Genome-fragment | 6.48 | 0     |
| S16_extracted_149025      | 1116  | No | NA  | 0  | 1 | Not-determined | Genome-fragment | NA   | 0     |
| S16_extracted_147843      | 2614  | No | NA  | 3  | 0 | Low-quality    | Genome-fragment | 4.51 | 0     |
| S16_extracted_149126      | 1311  | No | NA  | 0  | 1 | Not-determined | Genome-fragment | NA   | 0     |
| S16_extracted_149171      | 1125  | No | NA  | 0  | 1 | Not-determined | Genome-fragment | NA   | 0     |
| S6_vs_k141_47596[ full]   | 2614  | No | NA  | 0  | 0 | Not-determined | Genome-fragment | 4.74 | 0     |
| S16_extracted_149287      | 3137  | No | NA  | 0  | 1 | Not-determined | Genome-fragment | NA   | 0     |
| S16_extracted_149307      | 1336  | No | NA  | 0  | 1 | Not-determined | Genome-fragment | NA   | 0     |
| S8_extracted_k141_96988   | 2614  | No | 620 | 0  | 2 | Low-quality    | Genome-fragment | 0.29 | 76.28 |
| S16_extracted_149527      | 4886  | No | NA  | 0  | 1 | Not-determined | Genome-fragment | NA   | 0     |
| S5_vs_k141_25516[ full]   | 2615  | No | NA  | 1  | 0 | Low-quality    | Genome-fragment | 3.13 | 0     |
| S16_extracted_149558      | 5489  | No | NA  | 0  | 4 | Not-determined | Genome-fragment | NA   | 0     |
| S16_vs_14544[ full]       | 2615  | No | NA  | 0  | 0 | Low-quality    | Genome-fragment | 6.39 | 0     |
| S16_extracted_149694      | 1347  | No | NA  | 0  | 1 | Not-determined | Genome-fragment | NA   | 0     |
| S16_vs_60397[ full]       | 2615  | No | NA  | 0  | 1 | Low-quality    | Genome-fragment | 4.44 | 0     |
| S16_extracted_149940      | 1317  | No | NA  | 0  | 1 | Not-determined | Genome-fragment | NA   | 0     |
| S16_extracted_149965      | 1271  | No | NA  | 0  | 1 | Not-determined | Genome-fragment | NA   | 0     |
| S15_vs_70906[ full]       | 2615  | No | NA  | 0  | 0 | Low-quality    | Genome-fragment | 5.97 | 0     |
| S16_extracted_150077      | 3000  | No | NA  | 0  | 2 | Not-determined | Genome-fragment | NA   | 0     |
| S16_extracted_150239      | 3235  | No | NA  | 0  | 2 | Not-determined | Genome-fragment | NA   | 0     |
| S16_extracted_150298      | 1048  | No | NA  | 0  | 0 | Not-determined | Genome-fragment | NA   | 0     |
| S16_extracted_150422      | 1750  | No | NA  | 0  | 0 | Not-determined | Genome-fragment | NA   | 0     |
| S16_extracted_150482      | 1227  | No | NA  | 0  | 0 | Not-determined | Genome-fragment | NA   | 0     |
| S14_extracted_k141_24314  | 2616  | No | NA  | 5  | 0 | Low-quality    | Genome-fragment | 8.53 | 0     |
| S16_extracted_150814      | 1401  | No | NA  | 0  | 0 | Not-determined | Genome-fragment | NA   | 0     |
| S16_extracted_150849      | 1075  | No | NA  | 0  | 1 | Not-determined | Genome-fragment | NA   | 0     |
| S16_extracted_150936      | 1254  | No | NA  | 0  | 1 | Not-determined | Genome-fragment | NA   | 0     |
| S16_extracted_150968      | 1305  | No | NA  | 0  | 1 | Not-determined | Genome-fragment | NA   | 0     |
| S16_extracted_151099      | 2683  | No | NA  | 0  | 1 | Not-determined | Genome-fragment | NA   | 0     |
| S16_extracted_151122      | 1640  | No | NA  | 0  | 1 | Not-determined | Genome-fragment | NA   | 0     |
| S16_extracted_151136      | 1575  | No | NA  | 0  | 1 | Not-determined | Genome-fragment | NA   | 0     |
| S16_extracted_151171      | 1152  | No | NA  | 0  | 2 | Not-determined | Genome-fragment | NA   | 0     |
| S5_vs_k141_116151[ full]  | 2616  | No | NA  | 0  | 0 | Low-quality    | Genome-fragment | 6.35 | 0     |
| S7_vs_78650[ full]        | 2616  | No | NA  | 3  | 0 | Low-quality    | Genome-fragment | 6.19 | 0     |
| S16_extracted_151397      | 1521  | No | NA  | 0  | 2 | Not-determined | Genome-fragment | NA   | 0     |
| S5_extracted_k141_102318  | 2617  | No | NA  | 2  | 0 | Low-quality    | Genome-fragment | 7.68 | 0     |
| S16_extracted_151450      | 95263 | No | NA  | 11 | 6 | Complete       | High-quality    | 100  | 0     |
| S16_extracted_151484      | 1366  | No | NA  | 0  | 1 | Not-determined | Genome-fragment | NA   | 0     |
| S16_extracted_151488      | 1418  | No | NA  | 0  | 0 | Not-determined | Genome-fragment | NA   | 0     |
| S16_extracted_151505      | 4103  | No | NA  | 0  | 2 | Not-determined | Genome-fragment | NA   | 0     |
| S16_vs_113875[ full]      | 2617  | No | NA  | 3  | 0 | Low-quality    | Genome-fragment | 4.21 | 0     |
| S16_extracted_151607      | 1000  | No | NA  | 0  | 1 | Not-determined | Genome-fragment | NA   | 0     |
| S16_extracted_151663      | 1368  | No | NA  | 0  | 1 | Not-determined | Genome-fragment | NA   | 0     |
| S14_vs_k141_108072[ full] | 2618  | No | NA  | 4  | 0 | Low-quality    | Genome-fragment | 5.97 | 0     |
| S1_vs_k141_42979[ full]   | 2618  | No | NA  | 0  | 0 | Low-quality    | Genome-fragment | 6.21 | 0     |
| S16_extracted_151753      | 1224  | No | NA  | 0  | 1 | Not-determined | Genome-fragment | NA   | 0     |
| S16_extracted_151796      | 1304  | No | NA  | 0  | 2 | Not-determined | Genome-fragment | NA   | 0     |
| S7_vs_29541[ full]        | 2618  | No | NA  | 0  | 2 | Low-quality    | Genome-fragment | 2.98 | 0     |
| S16_extracted_151888      | 2946  | No | NA  | 0  | 2 | Not-determined | Genome-fragment | NA   | 0     |
| S16_extracted_151982      | 2589  | No | NA  | 0  | 2 | Not-determined | Genome-fragment | NA   | 0     |
| S16_extracted_152018      | 1137  | No | NA  | 0  | 0 | Not-determined | Genome-fragment | NA   | 0     |
| S16_extracted_152052      | 5506  | No | NA  | 0  | 2 | Not-determined | Genome-fragment | NA   | 0     |
| S6_vs_k141_37686[ full]   | 2618  | No | NA  | 0  | 1 | Low-quality    | Genome-fragment | 1.83 | 0     |
| S17_vs_k141_81488[ full]  | 2619  | No | NA  | 0  | 1 | Low-quality    | Genome-fragment | 2.35 | 0     |
| S16_extracted_k141_102045 | 2619  | No | NA  | 0  | 2 | Low-quality    | Genome-fragment | 1.45 | 0     |
| S16_extracted_152332      | 1398  | No | NA  | 0  | 1 | Not-determined | Genome-fragment | NA   | 0     |
| S7_vs_26116[ full]        | 2619  | No | NA  | 0  | 2 | Low-quality    | Genome-fragment | 1.79 | 0     |
| S16_extracted_152469      | 3206  | No | NA  | 0  | 3 | Not-determined | Genome-fragment | NA   | 0     |
| S16_extracted_152677      | 3294  | No | NA  | 0  | 0 | Not-determined | Genome-fragment | NA   | 0     |
| S16_extracted_152692      | 4200  | No | NA  | 0  | 0 | Not-determined | Genome-fragment | NA   | 0     |
| S1_vs_k141_46300[ full]   | 2620  | No | NA  | 1  | 0 | Low-quality    | Genome-fragment | 2.25 | 0     |
| S12_vs_k141_160390[ full] | 2620  | No | NA  | 0  | 2 | Low-quality    | Genome-fragment | 1.19 | 0     |
| S16_extracted_152817      | 1036  | No | NA  | 0  | 0 | Not-determined | Genome-fragment | NA   | 0     |
| S16_extracted_152824      | 1313  | No | NA  | 0  | 1 | Not-determined | Genome-fragment | NA   | 0     |
| S16_extracted_152843      | 1460  | No | NA  | 0  | 0 | Not-determined | Genome-fragment | NA   | 0     |
| S16_extracted_152852      | 3021  | No | NA  | 0  | 1 | Not-determined | Genome-fragment | NA   | 0     |
| S16_extracted_153017      | 1783  | No | NA  | 0  | 2 | Not-determined | Genome-fragment | NA   | 0     |
| S7_vs_30726[ full]        | 2621  | No | NA  | 0  | 2 | Low-quality    | Genome-fragment | 2.38 | 0     |
| S16_extracted_153087      | 3201  | No | NA  | 0  | 1 | Not-determined | Genome-fragment | NA   | 0     |
| S16_extracted_153132      | 2354  | No | NA  | 0  | 1 | Not-determined | Genome-fragment | NA   | 0     |
| S16_extracted_153230      | 2817  | No | NA  | 0  | 1 | Not-determined | Genome-fragment | NA   | 0     |
| S16_extracted_153378      | 5819  | No | NA  | 0  | 0 | Not-determined | Genome-fragment | NA   | 0     |
| S16_vs_74805[ full]       | 2621  | No | NA  | 1  | 0 | Low-quality    | Genome-fragment | 7.67 | 0     |
| S16_extracted_153562      | 4371  | No | NA  | 0  | 5 | Not-determined | Genome-fragment | NA   | 0     |
| S8_vs_k141_132016[ full]  | 2621  | No | NA  | 0  | 0 | Low-quality    | Genome-fragment | 5.85 | 0     |
| S16_extracted_153695      | 1353  | No | NA  | 0  | 1 | Not-determined | Genome-fragment | NA   | 0     |
| S16_extracted_153730      | 1912  | No | NA  | 0  | 1 | Not-determined | Genome-fragment | NA   | 0     |
| S16_extracted_153964      | 1688  | No | NA  | 0  | 1 | Not-determined | Genome-fragment | NA   | 0     |
| S17_vs_k141_150547[ full] | 2623  | No | NA  | 0  | 0 | Low-quality    | Genome-fragment | 5.61 | 0     |
| S16_extracted_154393      | 1475  | No | NA  | 0  | 1 | Not-determined | Genome-fragment | NA   | 0     |
| S16_extracted_154558      | 2336  | No | NA  | 0  | 2 | Not-determined | Genome-fragment | NA   | 0     |
| S16_extracted_154560      | 1109  | No | NA  | 0  | 0 | Not-determined | Genome-fragment | NA   | 0     |
| S16_extracted_154566      | 1156  | No | NA  | 0  | 0 | Not-determined | Genome-fragment | NA   | 0     |
| S16_extracted_154641      | 1491  | No | NA  | 0  | 1 | Not-determined | Genome-fragment | NA   | 0     |
| S16_extracted_154644      | 2515  | No | NA  | 0  | 0 | Not-determined | Genome-fragment | NA   | 0     |
| S11_extracted_k141_71142  | 2623  | No | NA  | 0  | 2 | Low-quality    | Genome-fragment | 2.03 | 0     |
| S16_vs_8018[ full]        | 2623  | No | NA  | 0  | 1 | Low-quality    | Genome-fragment | 4.67 | 0     |
| S16_extracted_154800      | 1077  | No | NA  | 0  | 0 | Not-determined | Genome-fragment | NA   | 0     |
| S16_extracted_154805      | 3247  | No | NA  | 0  | 1 | Not-determined | Genome-fragment | NA   | 0     |
| S9_vs_k141_61546[ full]   | 2624  | No | NA  | 1  | 0 | Low-quality    | Genome-fragment | 5.07 | 0     |
| S16_extracted_154931      | 1179  | No | NA  | 0  | 1 | Not-determined | Genome-fragment | NA   | 0     |
| S16_extracted_154970      | 3214  | No | NA  | 0  | 1 | Not-determined | Genome-fragment | NA   | 0     |
| S11_vs_k141_86652[ full]  | 2624  | No | NA  | 0  | 0 | Low-quality    | Genome-fragment | 3.71 | 0     |
| S16_extracted_155149      | 1367  | No | NA  | 0  | 0 | Not-determined | Genome-fragment | NA   | 0     |
| S16_extracted_155287      | 2602  | No | NA  | 0  | 0 | Not-determined | Genome-fragment | NA   | 0     |
| S16_extracted_155303      | 1078  | No | NA  | 0  | 1 | Not-determined | Genome-fragment | NA   | 0     |
| S16_extracted_155474      | 6551  | No | NA  | 0  | 2 | Not-determined | Genome-fragment | NA   | 0     |
| S16_extracted_155551      | 2973  | No | NA  | 0  | 1 | Not-determined | Genome-fragment | NA   | 0     |
| S12_vs_k141_90036[ full]  | 2624  | No | NA  | 0  | 0 | Low-quality    | Genome-fragment | 4.72 | 0     |
| S16_extracted_155739      | 6563  | No | NA  | 0  | 5 | Not-determined | Genome-fragment | NA   | 0     |
| S8_extracted_k141_191762  | 2624  | No | NA  | 4  | 0 | Low-quality    | Genome-fragment | 4.05 | 0     |
| S16_extracted_155782      | 1550  | No | NA  | 0  | 2 | Not-determined | Genome-fragment | NA   | 0     |
| S8_vs_k141_98420[ full]   | 2624  | No | NA  | 0  | 2 | Low-quality    | Genome-fragment | 1.4  | 0     |
| S16_extracted_155940      | 3531  | No | NA  | 0  | 1 | Not-determined | Genome-fragment | NA   | 0     |
| S16_extracted_156105      | 1047  | No | NA  | 0  | 0 | Not-determined | Genome-fragment | NA   | 0     |
| S16_extracted_156193      | 2373  | No | NA  | 0  | 1 | Not-determined | Genome-fragment | NA   | 0     |
| S17_extracted_k141_87173  | 2625  | No | NA  | 0  | 0 | Low-quality    | Genome-fragment | 3.33 | 0     |
| S16_extracted_156250      | 1721  | No | NA  | 0  | 3 | Not-determined | Genome-fragment | NA   | 0     |
| S16_extracted_156314      | 1672  | No | NA  | 0  | 1 | Not-determined | Genome-fragment | NA   | 0     |
| S16_extracted_156381      | 3220  | No | NA  | 0  | 0 | Not-determined | Genome-fragment | NA   | 0     |
| S16_extracted_156391      | 5364  | No | NA  | 0  | 3 | Not-determined | Genome-fragment | NA   | 0     |
| S16_extracted_156465      | 1434  | No | NA  | 0  | 0 | Not-determined | Genome-fragment | NA   | 0     |
| S11_vs_k141_8584[ full]   | 2625  | No | NA  | 1  | 0 | Low-quality    | Genome-fragment | 5.27 | 0     |
| S16_extracted_156503      | 1089  | No | NA  | 0  | 1 | Not-determined | Genome-fragment | NA   | 0     |
| S14_vs_k141_71655[ full]  | 2625  | No | NA  | 0  | 0 | Low-quality    | Genome-fragment | 7.54 | 0     |
| S16_extracted_156551      | 10631 | No | NA  | 0  | 2 | Not-determined | Genome-fragment | NA   | 0     |
| S16_extracted_156658      | 8722  | No | NA  | 0  | 3 | Not-determined | Genome-fragment | NA   | 0     |
| S16_extracted_156690      | 2203  | No | NA  | 0  | 1 | Not-determined | Genome-fragment | NA   | 0     |
| S16_extracted_156729      | 1475  | No | NA  | 0  | 1 | Not-determined | Genome-fragment | NA   | 0     |
| S3_vs_k141_21909[ full]   | 2625  | No | NA  | 4  | 0 | Low-quality    | Genome-fragment | 6.59 | 0     |
| S16_extracted_156951      | 1275  | No | NA  | 0  | 1 | Not-determined | Genome-fragment | NA   | 0     |
| S16_extracted_157103      | 1408  | No | NA  | 0  | 1 | Not-determined | Genome-fragment | NA   | 0     |
| S16_extracted_157191      | 7079  | No | NA  | 0  | 0 | Not-determined | Genome-fragment | NA   | 0     |
| S16_extracted_157304      | 1113  | No | NA  | 0  | 0 | Not-determined | Genome-fragment | NA   | 0     |
| S16_extracted_157353      | 1118  | No | NA  | 0  | 1 | Not-determined | Genome-fragment | NA   | 0     |
| S16_extracted_157355      | 1018  | No | NA  | 0  | 1 | Not-determined | Genome-fragment | NA   | 0     |
| S16_extracted_157378      | 1008  | No | NA  | 0  | 0 | Not-determined | Genome-fragment | NA   | 0     |
| S16_extracted_157392      | 16838 | No | NA  | 0  | 6 | Not-determined | Genome-fragment | NA   | 0     |
| S16_extracted_157396      | 1152  | No | NA  | 0  | 1 | Not-determined | Genome-fragment | NA   | 0     |
| S16_extracted_157434      | 1601  | No | NA  | 0  | 0 | Not-determined | Genome-fragment | NA   | 0     |
| S16_extracted_157457      | 1092  | No | NA  | 0  | 1 | Not-determined | Genome-fragment | NA   | 0     |
| S16_extracted_157476      | 1088  | No | NA  | 0  | 0 | Not-determined | Genome-fragment | NA   | 0     |
| S16_extracted_157506      | 1081  | No | NA  | 0  | 0 | Not-determined | Genome-fragment | NA   | 0     |
| S16_extracted_157671      | 3576  | No | NA  | 0  | 4 | Not-determined | Genome-fragment | NA   | 0     |
| S16_extracted_157731      | 1309  | No | NA  | 0  | 1 | Not-determined | Genome-fragment | NA   | 0     |
| S7_vs_137036[ full]       | 2625  | No | NA  | 0  | 1 | Low-quality    | Genome-fragment | 3.53 | 0     |
| S16_extracted_157795      | 1473  | No | NA  | 0  | 0 | Not-determined | Genome-fragment | NA   | 0     |
| S16_extracted_157872      | 1337  | No | NA  | 0  | 2 | Not-determined | Genome-fragment | NA   | 0     |
| S16_extracted_157878      | 1653  | No | NA  | 0  | 0 | Not-determined | Genome-fragment | NA   | 0     |
| S16_extracted_158090      | 1268  | No | NA  | 0  | 0 | Not-determined | Genome-fragment | NA   | 0     |
| S16_extracted_158219      | 1191  | No | NA  | 0  | 0 | Not-determined | Genome-fragment | NA   | 0     |
| S16_extracted_158254      | 7650  | No | NA  | 0  | 4 | Not-determined | Genome-fragment | NA   | 0     |
| S16_vs_95790[ full]       | 2625  | No | NA  | 4  | 0 | Low-quality    | Genome-fragment | 6.66 | 0     |
| S16_extracted_158406      | 1219  | No | NA  | 0  | 0 | Not-determined | Genome-fragment | NA   | 0     |
| S12_vs_k141_32589[ full]  | 2625  | No | NA  | 0  | 0 | Low-quality    | Genome-fragment | 7.07 | 0     |
| S16_extracted_1585        |       |    |     |    |   |                |                 |      |       |



|                             |       |     |       |   |   |                |                 |      |       |
|-----------------------------|-------|-----|-------|---|---|----------------|-----------------|------|-------|
| S12_extracted_k141_21226    | 2629  | No  | NA    | 2 | 0 | Low-quality    | Genome-fragment | 6.37 | 0     |
| S17_extracted_k141_168812   | 2630  | No  | NA    | 0 | 0 | Low-quality    | Genome-fragment | 9.03 | 0     |
| S16_extracted_160798        | 3367  | No  | NA    | 0 | 1 | Not-determined | Genome-fragment | NA   | 0     |
| S16_extracted_160863        | 6930  | No  | NA    | 0 | 2 | Not-determined | Genome-fragment | NA   | 0     |
| S1_vv_k141_1041711[full]    | 2630  | No  | NA    | 1 | 0 | Low-quality    | Genome-fragment | 6.81 | 0     |
| S5_vv_k141_1259031[full]    | 2630  | No  | NA    | 1 | 0 | Low-quality    | Genome-fragment | 4.95 | 0     |
| S16_extracted_160974        | 3700  | No  | NA    | 0 | 0 | Not-determined | Genome-fragment | NA   | 0     |
| S16_extracted_161010        | 2690  | No  | NA    | 0 | 0 | Not-determined | Genome-fragment | NA   | 0     |
| S16_extracted_161090        | 3343  | No  | NA    | 0 | 1 | Not-determined | Genome-fragment | NA   | 0     |
| S16_extracted_161285        | 5112  | No  | NA    | 0 | 0 | Not-determined | Genome-fragment | NA   | 0     |
| S16_extracted_161321        | 1156  | No  | NA    | 0 | 1 | Not-determined | Genome-fragment | NA   | 0     |
| S16_extracted_161358        | 2335  | No  | NA    | 0 | 1 | Not-determined | Genome-fragment | NA   | 0     |
| S16_extracted_161489        | 1642  | No  | NA    | 0 | 1 | Not-determined | Genome-fragment | NA   | 0     |
| S16_extracted_161593        | 1035  | No  | NA    | 0 | 2 | Not-determined | Genome-fragment | NA   | 0     |
| S16_extracted_161656        | 3548  | No  | NA    | 0 | 1 | Not-determined | Genome-fragment | NA   | 0     |
| S16_extracted_161679        | 1966  | No  | NA    | 0 | 2 | Not-determined | Genome-fragment | NA   | 0     |
| S16_extracted_161709        | 1750  | No  | NA    | 0 | 0 | Not-determined | Genome-fragment | NA   | 0     |
| S5_extracted_k141_108143    | 2631  | No  | NA    | 2 | 0 | Low-quality    | Genome-fragment | 8.16 | 0     |
| S16_extracted_161730        | 1254  | No  | NA    | 0 | 1 | Not-determined | Genome-fragment | NA   | 0     |
| S16_extracted_161733        | 1118  | No  | NA    | 0 | 0 | Not-determined | Genome-fragment | NA   | 0     |
| S16_extracted_161734        | 1109  | No  | NA    | 0 | 0 | Not-determined | Genome-fragment | NA   | 0     |
| S16_extracted_161741        | 2137  | No  | NA    | 0 | 1 | Not-determined | Genome-fragment | NA   | 0     |
| S16_extracted_161759        | 1054  | No  | NA    | 0 | 1 | Not-determined | Genome-fragment | NA   | 0     |
| S16_extracted_161820        | 1545  | No  | NA    | 0 | 1 | Not-determined | Genome-fragment | NA   | 0     |
| S16_extracted_161878        | 9158  | No  | NA    | 0 | 2 | Not-determined | Genome-fragment | NA   | 0     |
| S16_extracted_161951        | 4092  | No  | NA    | 0 | 1 | Not-determined | Genome-fragment | NA   | 0     |
| S16_extracted_162063        | 2718  | No  | NA    | 0 | 0 | Not-determined | Genome-fragment | NA   | 0     |
| S16_extracted_162086        | 7472  | No  | NA    | 0 | 7 | Not-determined | Genome-fragment | NA   | 0     |
| S16_extracted_162191        | 2113  | No  | NA    | 0 | 0 | Not-determined | Genome-fragment | NA   | 0     |
| S16_extracted_162261        | 1147  | No  | NA    | 0 | 1 | Not-determined | Genome-fragment | NA   | 0     |
| S16_extracted_162378        | 3098  | No  | NA    | 0 | 1 | Not-determined | Genome-fragment | NA   | 0     |
| S5_vv_k141_901491[full]     | 2631  | No  | NA    | 0 | 0 | Low-quality    | Genome-fragment | 6.13 | 0     |
| S11_vv_k141_852741[full]    | 2632  | No  | NA    | 0 | 1 | Low-quality    | Genome-fragment | 3.72 | 0     |
| S3_vv_k141_548581[full]     | 2632  | No  | NA    | 3 | 0 | Low-quality    | Genome-fragment | 6.45 | 0     |
| S16_extracted_162634        | 1234  | No  | NA    | 0 | 1 | Not-determined | Genome-fragment | NA   | 0     |
| S5_vv_k141_137411[full]     | 2632  | No  | NA    | 0 | 0 | Low-quality    | Genome-fragment | 4.05 | 0     |
| S16_extracted_162661        | 1619  | No  | NA    | 0 | 2 | Not-determined | Genome-fragment | NA   | 0     |
| S16_extracted_162665        | 1096  | No  | NA    | 0 | 1 | Not-determined | Genome-fragment | NA   | 0     |
| S12_vv_k141_846311[full]    | 2632  | No  | NA    | 0 | 0 | Low-quality    | Genome-fragment | 5.68 | 0     |
| S12_vv_k141_1146661[full]   | 2632  | No  | NA    | 1 | 0 | Low-quality    | Genome-fragment | 5.71 | 0     |
| S16_extracted_162877        | 1160  | No  | NA    | 0 | 0 | Not-determined | Genome-fragment | NA   | 0     |
| S8_extracted_k141_93905     | 2632  | No  | NA    | 0 | 2 | Low-quality    | Genome-fragment | 0.99 | 0     |
| S16_extracted_163111        | 3081  | No  | NA    | 0 | 3 | Not-determined | Genome-fragment | NA   | 0     |
| S8_extracted_k141_146894    | 2632  | No  | NA    | 0 | 2 | Low-quality    | Genome-fragment | 6.02 | 0     |
| S16_extracted_163118        | 3191  | No  | NA    | 0 | 1 | Not-determined | Genome-fragment | NA   | 0     |
| S16_extracted_163221        | 1167  | No  | NA    | 0 | 0 | Not-determined | Genome-fragment | NA   | 0     |
| S14_extracted_k141_104685   | 2633  | No  | NA    | 1 | 0 | Low-quality    | Genome-fragment | 1.47 | 0     |
| S3_extracted_k141_67581     | 2633  | No  | NA    | 0 | 0 | Low-quality    | Genome-fragment | 2.9  | 0     |
| S16_extracted_163493        | 3438  | No  | NA    | 0 | 0 | Not-determined | Genome-fragment | NA   | 0     |
| S16_extracted_163545        | 4913  | No  | NA    | 0 | 1 | Not-determined | Genome-fragment | NA   | 0     |
| S16_extracted_163558        | 1761  | No  | NA    | 0 | 2 | Not-determined | Genome-fragment | NA   | 0     |
| S5_vv_k141_102241[full]     | 2633  | No  | NA    | 0 | 0 | Low-quality    | Genome-fragment | 3.8  | 0     |
| S16_extracted_163592        | 3281  | No  | NA    | 1 | 2 | Not-determined | Genome-fragment | NA   | 0     |
| S16_extracted_163674        | 3336  | No  | NA    | 0 | 1 | Not-determined | Genome-fragment | NA   | 0     |
| S16_extracted_163702        | 1314  | No  | NA    | 0 | 0 | Not-determined | Genome-fragment | NA   | 0     |
| S16_extracted_163765        | 1036  | No  | NA    | 0 | 2 | Not-determined | Genome-fragment | NA   | 0     |
| S16_extracted_163847        | 2184  | No  | NA    | 0 | 0 | Not-determined | Genome-fragment | NA   | 0     |
| S16_vv_167051[full]         | 2633  | No  | NA    | 3 | 0 | Low-quality    | Genome-fragment | 7.97 | 0     |
| S16_extracted_163921        | 3177  | No  | NA    | 0 | 3 | Not-determined | Genome-fragment | NA   | 0     |
| S16_extracted_164037        | 2277  | No  | NA    | 0 | 0 | Not-determined | Genome-fragment | NA   | 0     |
| S16_extracted_164087        | 1023  | No  | NA    | 0 | 1 | Not-determined | Genome-fragment | NA   | 0     |
| S16_extracted_164146        | 1296  | No  | NA    | 0 | 1 | Not-determined | Genome-fragment | NA   | 0     |
| S16_extracted_164162        | 1149  | No  | NA    | 0 | 0 | Not-determined | Genome-fragment | NA   | 0     |
| S16_extracted_164236        | 2215  | No  | NA    | 0 | 1 | Not-determined | Genome-fragment | NA   | 0     |
| S16_extracted_164353        | 1130  | No  | NA    | 0 | 0 | Not-determined | Genome-fragment | NA   | 0     |
| S9_vv_k141_154951[full]     | 2634  | No  | NA    | 5 | 0 | Low-quality    | Genome-fragment | 6.27 | 0     |
| S11_extracted_k141_70180    | 2634  | No  | NA    | 0 | 0 | Low-quality    | Genome-fragment | 0.95 | 0     |
| S16_extracted_164647        | 1010  | No  | NA    | 0 | 1 | Not-determined | Genome-fragment | NA   | 0     |
| S8_extracted_164667         | 1255  | No  | NA    | 0 | 1 | Not-determined | Genome-fragment | NA   | 0     |
| S16_extracted_164704        | 1830  | No  | NA    | 0 | 1 | Not-determined | Genome-fragment | NA   | 0     |
| S16_extracted_164732        | 5160  | No  | NA    | 0 | 3 | Not-determined | Genome-fragment | NA   | 0     |
| S16_extracted_164823        | 1104  | No  | NA    | 0 | 0 | Not-determined | Genome-fragment | NA   | 0     |
| S16_extracted_164913        | 17025 | Yes | 15002 | 6 | 2 | High-quality   | High-quality    | 100  | 11.88 |
| S3_vv_k141_677091[full]     | 2634  | No  | NA    | 2 | 0 | Low-quality    | Genome-fragment | 1.45 | 0     |
| S16_extracted_164994        | 1194  | No  | NA    | 0 | 1 | Not-determined | Genome-fragment | NA   | 0     |
| S16_extracted_165020        | 3566  | No  | NA    | 0 | 0 | Not-determined | Genome-fragment | NA   | 0     |
| S7_extracted_63807          | 2634  | No  | NA    | 1 | 0 | Low-quality    | Genome-fragment | 2.74 | 0     |
| S16_extracted_165087        | 3193  | No  | NA    | 0 | 1 | Not-determined | Genome-fragment | NA   | 0     |
| S16_extracted_165101        | 7282  | No  | NA    | 0 | 0 | Not-determined | Genome-fragment | NA   | 0     |
| S16_extracted_165129        | 1245  | No  | NA    | 0 | 1 | Not-determined | Genome-fragment | NA   | 0     |
| S16_extracted_165238        | 4100  | No  | NA    | 0 | 4 | Not-determined | Genome-fragment | NA   | 0     |
| S16_extracted_165411        | 3953  | No  | NA    | 0 | 4 | Not-determined | Genome-fragment | NA   | 0     |
| S16_extracted_165504        | 1226  | No  | NA    | 0 | 1 | Not-determined | Genome-fragment | NA   | 0     |
| S10_vv_12801[full]          | 2634  | No  | NA    | 0 | 0 | Low-quality    | Genome-fragment | 3.46 | 0     |
| S16_extracted_165604        | 1141  | No  | NA    | 0 | 1 | Not-determined | Genome-fragment | NA   | 0     |
| S16_extracted_165627        | 3355  | No  | NA    | 0 | 2 | Not-determined | Genome-fragment | NA   | 0     |
| S8_extracted_k141_203223    | 2634  | No  | NA    | 1 | 0 | Low-quality    | Genome-fragment | 5.24 | 0     |
| S16_extracted_165820        | 5528  | No  | NA    | 0 | 3 | Not-determined | Genome-fragment | NA   | 0     |
| S17_extracted_k141_61594    | 2635  | No  | 2430  | 3 | 0 | Low-quality    | Genome-fragment | 8.51 | 0     |
| S11_vv_k141_322451[full]    | 2635  | Yes |       | 3 | 1 | Low-quality    | Genome-fragment | 2.63 | 7.78  |
| S16_extracted_165993        | 4521  | No  | NA    | 0 | 2 | Not-determined | Genome-fragment | NA   | 0     |
| S16_extracted_166046        | 3466  | No  | NA    | 0 | 4 | Not-determined | Genome-fragment | NA   | 0     |
| S16_extracted_166145        | 1586  | No  | NA    | 0 | 2 | Not-determined | Genome-fragment | NA   | 0     |
| S4_extracted_18567          | 2635  | No  | NA    | 7 | 0 | Low-quality    | Genome-fragment | 8.67 | 0     |
| S16_extracted_166258        | 1034  | No  | NA    | 2 | 1 | Not-determined | Genome-fragment | NA   | 0     |
| S8_vv_k141_590021[full]     | 2635  | No  | NA    | 1 | 0 | Low-quality    | Genome-fragment | 5.57 | 0     |
| S16_extracted_166293        | 2585  | No  | NA    | 0 | 2 | Not-determined | Genome-fragment | NA   | 0     |
| S17_vv_k141_1264671[full]   | 2637  | No  | NA    | 1 | 0 | Low-quality    | Genome-fragment | 4.74 | 0     |
| S16_extracted_166511        | 1814  | No  | NA    | 0 | 1 | Not-determined | Genome-fragment | NA   | 0     |
| S5_vv_k141_608591[full]     | 2637  | No  | NA    | 1 | 0 | Low-quality    | Genome-fragment | 6.25 | 0     |
| S16_extracted_166667        | 1709  | No  | NA    | 0 | 1 | Not-determined | Genome-fragment | NA   | 0     |
| S16_extracted_166677        | 5073  | No  | NA    | 0 | 2 | Not-determined | Genome-fragment | NA   | 0     |
| S16_extracted_166802        | 1032  | No  | NA    | 0 | 2 | Not-determined | Genome-fragment | NA   | 0     |
| S16_extracted_166845        | 1162  | No  | NA    | 0 | 0 | Not-determined | Genome-fragment | NA   | 0     |
| S16_extracted_166923        | 1000  | No  | NA    | 0 | 0 | Not-determined | Genome-fragment | NA   | 0     |
| S16_extracted_166974        | 1495  | No  | NA    | 0 | 0 | Not-determined | Genome-fragment | NA   | 0     |
| S16_extracted_167027        | 1573  | No  | NA    | 0 | 1 | Not-determined | Genome-fragment | NA   | 0     |
| S16_extracted_167132        | 1308  | No  | NA    | 0 | 1 | Not-determined | Genome-fragment | NA   | 0     |
| S16_extracted_167144        | 1018  | No  | NA    | 0 | 0 | Not-determined | Genome-fragment | NA   | 0     |
| S5_vv_k141_846121[full]     | 2637  | No  | NA    | 0 | 2 | Low-quality    | Genome-fragment | 1.21 | 0     |
| S12_vv_k141_1544061[full]   | 2637  | No  | NA    | 2 | 0 | Low-quality    | Genome-fragment | 6.3  | 0     |
| S16_extracted_167312        | 1074  | No  | NA    | 0 | 0 | Not-determined | Genome-fragment | NA   | 0     |
| S16_extracted_167321        | 3108  | No  | NA    | 0 | 0 | Not-determined | Genome-fragment | NA   | 0     |
| S16_extracted_167441        | 1688  | No  | NA    | 0 | 0 | Not-determined | Genome-fragment | NA   | 0     |
| S5_vv_k141_597891[full]     | 2638  | No  | NA    | 0 | 1 | Low-quality    | Genome-fragment | 4.46 | 0     |
| S16_extracted_167580        | 1846  | No  | NA    | 0 | 1 | Not-determined | Genome-fragment | NA   | 0     |
| S16_extracted_167624        | 1330  | No  | NA    | 0 | 2 | Not-determined | Genome-fragment | NA   | 0     |
| S16_extracted_167674        | 1037  | No  | NA    | 0 | 1 | Not-determined | Genome-fragment | NA   | 0     |
| S16_extracted_167848        | 1382  | No  | NA    | 0 | 0 | Not-determined | Genome-fragment | NA   | 0     |
| S7_extracted_69574          | 2638  | No  | NA    | 0 | 3 | Low-quality    | Genome-fragment | 1.74 | 0     |
| S16_vv_24401[full]          | 2638  | No  | NA    | 1 | 0 | Low-quality    | Genome-fragment | 1.63 | 0     |
| S16_extracted_167983        | 3577  | No  | NA    | 0 | 1 | Not-determined | Genome-fragment | NA   | 0     |
| S16_extracted_167986        | 2483  | No  | NA    | 0 | 0 | Not-determined | Genome-fragment | NA   | 0     |
| S16_extracted_167988        | 1153  | No  | NA    | 0 | 2 | Not-determined | Genome-fragment | NA   | 0     |
| S16_extracted_168092        | 4092  | No  | NA    | 0 | 1 | Not-determined | Genome-fragment | NA   | 0     |
| S14_vv_k141_869551[full]    | 2639  | No  | NA    | 1 | 0 | Low-quality    | Genome-fragment | 2.27 | 0     |
| S10_extracted_21093         | 2639  | No  | NA    | 0 | 1 | Low-quality    | Genome-fragment | 5.68 | 0     |
| S16_extracted_168243        | 3507  | No  | NA    | 0 | 1 | Not-determined | Genome-fragment | NA   | 0     |
| S16_extracted_168418        | 1360  | No  | NA    | 0 | 1 | Not-determined | Genome-fragment | NA   | 0     |
| S6_extracted_k141_3133      | 2639  | No  | NA    | 4 | 0 | Low-quality    | Genome-fragment | 4.33 | 0     |
| S16_extracted_168527        | 3015  | No  | NA    | 0 | 1 | Not-determined | Genome-fragment | NA   | 0     |
| S16_extracted_168629        | 1215  | No  | NA    | 0 | 1 | Not-determined | Genome-fragment | NA   | 0     |
| S17_vv_k141_1086221[full]   | 2640  | No  | NA    | 0 | 3 | Low-quality    | Genome-fragment | 0.91 | 0     |
| S16_extracted_168837        | 5225  | No  | NA    | 0 | 3 | Not-determined | Genome-fragment | NA   | 0     |
| S13_vv_55811[full]          | 2640  | No  | NA    | 0 | 0 | Low-quality    | Genome-fragment | 1.62 | 0     |
| S14_vv_k141_949971[112]gene | 2640  | No  | NA    | 1 | 0 | Low-quality    | Genome-fragment | 8.1  | 0     |
| S16_extracted_169022        | 1644  | No  | NA    | 0 | 1 | Not-determined | Genome-fragment | NA   | 0     |
| S16_extracted_169054        | 1953  | No  | NA    | 0 | 1 | Not-determined | Genome-fragment | NA   | 0     |
| S16_extracted_169077        | 3162  | No  | NA    | 0 | 2 | Not-determined | Genome-fragment | NA   | 0     |
| S16_extracted_169119        | 3140  | No  | NA    | 0 | 2 | Not-determined | Genome-fragment | NA   | 0     |
| S16_extracted_169151        | 3008  | No  | NA    | 0 | 1 | Not-determined | Genome-fragment | NA   | 0     |
| S16_extracted_169245        | 1314  | No  | NA    | 0 | 1 | Not-determined | Genome-fragment | NA   | 0     |
| S1_extracted_k141_311742    | 2640  | No  | NA    | 0 | 1 | Low-quality    | Genome-fragment | 5.68 | 0     |
| S16_extracted_169365        | 1342  | No  | NA    | 0 | 0 | Not-determined | Genome-fragment | NA   | 0     |
| S16_extracted_169377        | 4271  | No  | NA    | 0 | 1 | Not-determined | Genome-fragment | NA   | 0     |
| S16_extracted_169433        | 5238  | No  | NA    | 0 | 1 | Not-determined | Genome-fragment | NA   | 0     |
| S16_extracted_169545        | 3510  | No  | NA    | 0 | 1 | Not-determined | Genome-fragment | NA   | 0     |
| S16_extracted_169555        | 1090  | No  | NA    | 0 | 1 | Not-d          |                 |      |       |



|                           |       |     |       |    |             |                 |                 |       |       |
|---------------------------|-------|-----|-------|----|-------------|-----------------|-----------------|-------|-------|
| S16_extracted_170930      | 2238  | No  | NA    | 0  | 1           | Not-determined  | Genome-fragment | NA    | 0     |
| S16_extracted_170995      | 3905  | No  | NA    | 0  | 1           | Not-determined  | Genome-fragment | NA    | 0     |
| S16_extracted_171001      | 2199  | No  | NA    | 0  | 1           | Not-determined  | Genome-fragment | NA    | 0     |
| S16_extracted_171048      | 1202  | No  | NA    | 0  | 1           | Not-determined  | Genome-fragment | NA    | 0     |
| S1_vo_k141_118035  full   | 2641  | No  | NA    | 1  | 0           | Low-quality     | Genome-fragment | 5.43  | 0     |
| S16_extracted_171127      | 4776  | No  | NA    | 0  | 1           | Not-determined  | Genome-fragment | NA    | 0     |
| S16_extracted_171205      | 1345  | No  | NA    | 0  | 0           | Not-determined  | Genome-fragment | NA    | 0     |
| S7_vo_60187  full         | 2641  | No  | NA    | 0  | 2           | Low-quality     | Genome-fragment | 2.07  | 0     |
| S16_extracted_171586      | 3361  | No  | NA    | 0  | 1           | Not-determined  | Genome-fragment | NA    | 0     |
| S16_extracted_171588      | 1214  | No  | NA    | 0  | 2           | Not-determined  | Genome-fragment | NA    | 0     |
| S16_extracted_171649      | 2528  | No  | NA    | 0  | 1           | Not-determined  | Genome-fragment | NA    | 0     |
| S16_extracted_171654      | 4331  | No  | NA    | 0  | 1           | Not-determined  | Genome-fragment | NA    | 0     |
| S16_extracted_171748      | 1000  | No  | NA    | 0  | 1           | Not-determined  | Genome-fragment | NA    | 0     |
| S16_extracted_171755      | 17782 | No  | NA    | 0  | 8           | Not-determined  | Genome-fragment | NA    | 0     |
| S16_extracted_171787      | 2178  | No  | NA    | 0  | 3           | Not-determined  | Genome-fragment | NA    | 0     |
| S16_extracted_171926      | 3722  | No  | NA    | 0  | 1           | Not-determined  | Genome-fragment | NA    | 0     |
| S17_vo_k141_135473  full  | 2642  | No  | NA    | 0  | 0           | Low-quality     | Genome-fragment | 5.92  | 0     |
| S16_extracted_172081      | 1590  | No  | NA    | 0  | 0           | Not-determined  | Genome-fragment | NA    | 0     |
| S11_vo_k141_61520  full   | 2642  | No  | NA    | 2  | 0           | Low-quality     | Genome-fragment | 7.73  | 0     |
| S16_extracted_172223      | 1169  | No  | NA    | 0  | 0           | Not-determined  | Genome-fragment | NA    | 0     |
| S3_vo_k141_47123  full    | 2642  | No  | NA    | 2  | 0           | Low-quality     | Genome-fragment | 2.8   | 0     |
| S16_extracted_172419      | 1088  | No  | NA    | 0  | 2           | Not-determined  | Genome-fragment | NA    | 0     |
| S16_extracted_172544      | 1885  | No  | NA    | 0  | 1           | Not-determined  | Genome-fragment | NA    | 0     |
| S16_extracted_172550      | 1025  | No  | NA    | 0  | 0           | Not-determined  | Genome-fragment | NA    | 0     |
| S16_extracted_172552      | 1559  | No  | NA    | 0  | 1           | Not-determined  | Genome-fragment | NA    | 0     |
| S16_extracted_172588      | 2463  | No  | NA    | 0  | 0           | Not-determined  | Genome-fragment | NA    | 0     |
| S16_extracted_172748      | 1002  | No  | NA    | 0  | 0           | Not-determined  | Genome-fragment | NA    | 0     |
| S16_extracted_172782      | 1090  | No  | NA    | 0  | 1           | Not-determined  | Genome-fragment | NA    | 0     |
| S16_extracted_172785      | 3258  | No  | NA    | 0  | 2           | Not-determined  | Genome-fragment | NA    | 0     |
| S16_extracted_172791      | 1455  | No  | NA    | 0  | 1           | Not-determined  | Genome-fragment | NA    | 0     |
| S16_extracted_172830      | 1346  | No  | NA    | 0  | 1           | Not-determined  | Genome-fragment | NA    | 0     |
| S16_extracted_172846      | 1463  | No  | NA    | 0  | 1           | Not-determined  | Genome-fragment | NA    | 0     |
| S16_extracted_172877      | 1837  | No  | NA    | 0  | 0           | Not-determined  | Genome-fragment | NA    | 0     |
| S16_extracted_172897      | 36447 | No  | NA    | 22 | 1           | Complete        | High-quality    | 100   | 0     |
| S16_vo_8161  full         | 2642  | No  | NA    | 1  | 0           | Low-quality     | Genome-fragment | 7     | 0     |
| S16_extracted_173000      | 6383  | No  | NA    | 0  | 1           | Not-determined  | Genome-fragment | NA    | 0     |
| S16_extracted_173095      | 96013 | No  | NA    | 10 | 0           | Complete        | High-quality    | 100   | 0     |
| S16_extracted_173099      | 77224 | No  | NA    | 22 | 4           | Complete        | High-quality    | 100   | 0     |
| S16_extracted_173103      | 3994  | No  | NA    | 0  | 0           | Not-determined  | Genome-fragment | NA    | 0     |
| S10_vo_101681  full       | 2642  | No  | NA    | 0  | 2           | Low-quality     | Genome-fragment | 1.47  | 0     |
| S16_extracted_173109      | 28358 | No  | NA    | 12 | 1           | Complete        | High-quality    | 100   | 0     |
| S16_extracted_173214      | 3343  | No  | NA    | 0  | 0           | Not-determined  | Genome-fragment | NA    | 0     |
| S16_extracted_173133      | 12950 | Yes | 12101 | 3  | 2           | Complete        | High-quality    | 100   | 6.56  |
| S16_vo_8916  full         | 8185  | No  | NA    | 0  | 0           | Not-determined  | Genome-fragment | NA    | 0     |
| S16_vo_15099  full        | 52784 | No  | NA    | 17 | 1           | High-quality    | High-quality    | 100   | 0     |
| S16_vo_20060  full        | 43359 | No  | NA    | 14 | 0           | High-quality    | High-quality    | 98.23 | 0     |
| S12_vo_k141_157771  full  | 2642  | No  | NA    | 1  | 0           | Low-quality     | Genome-fragment | 6.1   | 0     |
| S16_vo_59697  full        | 43120 | No  | NA    | 16 | 1           | High-quality    | High-quality    | 97.47 | 0     |
| S16_vo_75108  full        | 41188 | No  | NA    | 7  | 0           | High-quality    | High-quality    | 100   | 0     |
| S16_vo_76823  full        | 54530 | No  | NA    | 18 | 1           | High-quality    | High-quality    | 100   | 0     |
| S16_vo_78361  full        | 37771 | No  | NA    | 20 | 2           | High-quality    | High-quality    | 99.76 | 0     |
| S16_vo_78425  full        | 39776 | No  | NA    | 15 | 1           | High-quality    | High-quality    | 100   | 0     |
| S16_vo_127905  full       | 63611 | No  | NA    | 20 | 0           | High-quality    | High-quality    | 100   | 0     |
| S16_vo_128557  full       | 3427  | No  | NA    | 0  | 1           | Not-determined  | Genome-fragment | NA    | 0     |
| S16_vo_129934  full       | 5752  | No  | NA    | 0  | 0           | Not-determined  | Genome-fragment | NA    | 0     |
| S16_vo_172749  full       | 37744 | No  | NA    | 22 | 0           | High-quality    | High-quality    | 96.52 | 0     |
| S16_vo_173079  full       | 61575 | No  | NA    | 22 | 2           | High-quality    | High-quality    | 99.07 | 0     |
| S16_vo_173096  full       | 34364 | No  | NA    | 9  | 0           | High-quality    | High-quality    | 100   | 0     |
| S16_vo_173102  full       | 43714 | No  | NA    | 7  | 0           | High-quality    | High-quality    | 96.76 | 0     |
| S16_vo_173113  full       | 2615  | No  | NA    | 0  | 0           | Not-determined  | Genome-fragment | NA    | 0     |
| S16_vo_173117  full       | 3494  | No  | NA    | 0  | 0           | Not-determined  | Genome-fragment | NA    | 0     |
| S8_vo_k141_80227  full    | 2642  | No  | NA    | 15 | 0           | Low-quality     | Genome-fragment | 7.22  | 0     |
| S16_vo_173128  full       | 2446  | No  | NA    | 0  | 0           | Not-determined  | Genome-fragment | NA    | 0     |
| S1_extracted_k141_64894   | 2643  | No  | NA    | 0  | 0           | Low-quality     | Genome-fragment | 3.37  | 0     |
| S16_vo_173141  full       | 3774  | No  | NA    | 0  | 0           | Medium-quality  | Genome-fragment | 57.26 | 0     |
| S16_vo_173146  full       | 1852  | No  | NA    | 0  | 0           | Not-determined  | Genome-fragment | NA    | 0     |
| S13_extracted_78368       | 2644  | No  | NA    | 0  | 0           | Low-quality     | Genome-fragment | 3.37  | 0     |
| S16_vo_97  full           | 6469  | No  | NA    | 0  | 4           | Not-determined  | Genome-fragment | NA    | 0     |
| S3_vo_k141_80648  full    | 2644  | Yes | 1103  | 1  | Low-quality | Genome-fragment | 2.51            | 58.28 | 0     |
| S16_vo_241  full          | 1357  | No  | NA    | 0  | 1           | Not-determined  | Genome-fragment | NA    | 0     |
| S16_vo_438  full          | 1790  | No  | NA    | 0  | 1           | Not-determined  | Genome-fragment | NA    | 0     |
| S8_vo_k141_120582  full   | 2644  | No  | NA    | 0  | 0           | Low-quality     | Genome-fragment | 8.12  | 0     |
| S3_vo_k141_2833  full     | 2645  | No  | NA    | 1  | 0           | Low-quality     | Genome-fragment | 2.37  | 0     |
| S3_vo_k141_77995  full    | 2645  | No  | NA    | 2  | 0           | Low-quality     | Genome-fragment | 6.19  | 0     |
| S14_extracted_k141_8044   | 2646  | No  | NA    | 7  | 0           | Low-quality     | Genome-fragment | 6.72  | 0     |
| S14_extracted_k141_54880  | 2646  | No  | NA    | 4  | 0           | Low-quality     | Genome-fragment | 6.28  | 0     |
| S14_vo_k141_74550  full   | 2646  | No  | NA    | 3  | 0           | Low-quality     | Genome-fragment | 7.2   | 0     |
| S16_vo_748  full          | 1712  | No  | NA    | 0  | 1           | Not-determined  | Genome-fragment | NA    | 0     |
| S16_vo_754  full          | 4602  | No  | NA    | 0  | 2           | Not-determined  | Genome-fragment | NA    | 0     |
| S16_vo_780  full          | 1465  | No  | NA    | 0  | 1           | Not-determined  | Genome-fragment | NA    | 0     |
| S14_vo_k141_94423  full   | 2646  | No  | NA    | 0  | 1           | Low-quality     | Genome-fragment | 3.2   | 0     |
| S16_vo_838  full          | 3966  | No  | NA    | 0  | 1           | Not-determined  | Genome-fragment | NA    | 0     |
| S16_vo_847  full          | 2140  | No  | NA    | 0  | 1           | Not-determined  | Genome-fragment | NA    | 0     |
| S12_vo_k141_174850  full  | 2646  | No  | NA    | 2  | 0           | Low-quality     | Genome-fragment | 6     | 0     |
| S16_vo_890  full          | 4004  | No  | NA    | 0  | 4           | Not-determined  | Genome-fragment | NA    | 0     |
| S16_vo_1025  full         | 4174  | No  | NA    | 0  | 2           | Not-determined  | Genome-fragment | NA    | 0     |
| S11_vo_k141_64384  full   | 2647  | No  | NA    | 0  | 0           | Low-quality     | Genome-fragment | 1.47  | 0     |
| S2_vo_k141_2789  full     | 2647  | No  | NA    | 2  | 0           | Low-quality     | Genome-fragment | 6.18  | 0     |
| S16_vo_1003  full         | 4784  | No  | NA    | 0  | 1           | Not-determined  | Genome-fragment | NA    | 0     |
| S16_vo_1321  full         | 1735  | No  | NA    | 0  | 0           | Not-determined  | Genome-fragment | NA    | 0     |
| S16_vo_1355  full         | 3780  | No  | NA    | 0  | 3           | Not-determined  | Genome-fragment | NA    | 0     |
| S16_vo_1368  full         | 3910  | No  | NA    | 0  | 1           | Not-determined  | Genome-fragment | NA    | 0     |
| S16_vo_1386  full         | 2251  | No  | NA    | 0  | 2           | Not-determined  | Genome-fragment | NA    | 0     |
| S16_vo_1402  full         | 1189  | No  | NA    | 0  | 1           | Not-determined  | Genome-fragment | NA    | 0     |
| S16_vo_1407  full         | 2616  | No  | NA    | 0  | 3           | Not-determined  | Genome-fragment | NA    | 0     |
| S16_vo_1434  full         | 1420  | No  | NA    | 0  | 2           | Not-determined  | Genome-fragment | NA    | 0     |
| S16_vo_1473  full         | 1730  | No  | NA    | 0  | 0           | Not-determined  | Genome-fragment | NA    | 0     |
| S1_vo_k141_120953  full   | 2648  | No  | NA    | 0  | 2           | Low-quality     | Genome-fragment | 5.61  | 0     |
| S16_vo_1554  full         | 1615  | No  | NA    | 0  | 1           | Not-determined  | Genome-fragment | NA    | 0     |
| S16_vo_1626  full         | 2561  | No  | NA    | 0  | 1           | Not-determined  | Genome-fragment | NA    | 0     |
| S16_vo_1634  full         | 1150  | No  | NA    | 0  | 2           | Not-determined  | Genome-fragment | NA    | 0     |
| S5_vo_k141_78650  full    | 2648  | No  | NA    | 0  | 0           | Low-quality     | Genome-fragment | 7.12  | 0     |
| S7_vo_2697  full          | 2648  | No  | NA    | 0  | 0           | Low-quality     | Genome-fragment | 5.97  | 0     |
| S16_vo_35053  full        | 2648  | No  | NA    | 0  | 0           | Low-quality     | Genome-fragment | 5.77  | 0     |
| S4_extracted_2725         | 2648  | No  | NA    | 0  | 0           | Low-quality     | Genome-fragment | 8.74  | 0     |
| S16_vo_2031  full         | 4215  | No  | NA    | 0  | 4           | Not-determined  | Genome-fragment | NA    | 0     |
| S5_vo_k141_30944  full    | 2649  | No  | NA    | 1  | 0           | Low-quality     | Genome-fragment | 4.48  | 0     |
| S5_vo_k141_81346  full    | 2649  | No  | NA    | 1  | 0           | Low-quality     | Genome-fragment | 0.95  | 0     |
| S12_vo_k141_23502  full   | 2649  | No  | NA    | 0  | 0           | Low-quality     | Genome-fragment | 6.08  | 0     |
| S16_vo_2220  full         | 5239  | No  | NA    | 0  | 3           | Not-determined  | Genome-fragment | NA    | 0     |
| S6_vo_k141_3902  full     | 2649  | No  | NA    | 0  | 0           | Low-quality     | Genome-fragment | 4.36  | 0     |
| S17_vo_k141_144743  full  | 2650  | No  | NA    | 0  | 0           | Low-quality     | Genome-fragment | 0.40  | 0     |
| S11_extracted_k141_133107 | 2650  | No  | NA    | 2  | 0           | Low-quality     | Genome-fragment | 4.58  | 0     |
| S16_vo_2488  full         | 2436  | No  | NA    | 0  | 2           | Not-determined  | Genome-fragment | NA    | 0     |
| S5_extracted_k141_145230  | 2650  | No  | NA    | 0  | 2           | Low-quality     | Genome-fragment | 4.3   | 0     |
| S16_vo_2521  full         | 3392  | No  | NA    | 0  | 0           | Not-determined  | Genome-fragment | NA    | 0     |
| S16_vo_2564  full         | 1854  | No  | NA    | 0  | 0           | Not-determined  | Genome-fragment | NA    | 0     |
| S16_vo_2578  full         | 2246  | No  | NA    | 0  | 3           | Not-determined  | Genome-fragment | NA    | 0     |
| S7_vo_86942  full         | 2650  | No  | NA    | 0  | 0           | Low-quality     | Genome-fragment | 6.34  | 0     |
| S16_vo_93040  full        | 2650  | No  | NA    | 1  | 0           | Low-quality     | Genome-fragment | 6.07  | 0     |
| S12_extracted_k141_185164 | 2650  | No  | NA    | 0  | 0           | Low-quality     | Genome-fragment | 6.41  | 0     |
| S16_vo_2800  full         | 2815  | No  | NA    | 0  | 4           | Not-determined  | Genome-fragment | NA    | 0     |
| S6_vo_k141_2768  full     | 2650  | No  | NA    | 1  | 0           | Low-quality     | Genome-fragment | 2.13  | 0     |
| S16_vo_2929  full         | 1103  | No  | NA    | 0  | 3           | Not-determined  | Genome-fragment | NA    | 0     |
| S9_vo_k141_89547  full    | 2651  | No  | NA    | 0  | 0           | Low-quality     | Genome-fragment | 6.08  | 0     |
| S16_vo_3046  full         | 3699  | No  | NA    | 0  | 1           | Not-determined  | Genome-fragment | NA    | 0     |
| S16_vo_3058  full         | 3651  | No  | NA    | 0  | 3           | Not-determined  | Genome-fragment | NA    | 0     |
| S16_vo_3138  full         | 3620  | No  | NA    | 0  | 2           | Not-determined  | Genome-fragment | NA    | 0     |
| S16_vo_3330  full         | 4842  | No  | NA    | 0  | 0           | Not-determined  | Genome-fragment | NA    | 0     |
| S11_vo_k141_19935  full   | 2651  | No  | NA    | 2  | 0           | Low-quality     | Genome-fragment | 6.24  | 0     |
| S16_vo_116091  full       | 2651  | No  | NA    | 1  | 0           | Low-quality     | Genome-fragment | 1.06  | 0     |
| S6_vo_k141_16077  full    | 2651  | No  | NA    | 0  | 1           | Low-quality     | Genome-fragment | 5.06  | 0     |
| S16_vo_3856  full         | 2388  | No  | NA    | 0  | 1           | Not-determined  | Genome-fragment | NA    | 0     |
| S16_vo_3872  full         | 2499  | No  | NA    | 0  | 1           | Not-determined  | Genome-fragment | NA    | 0     |
| S16_vo_3905  full         | 1073  | No  | NA    | 0  | 0           | Not-determined  | Genome-fragment | NA    | 0     |
| S16_vo_4004  full         | 1644  | No  | NA    | 0  | 1           | Not-determined  | Genome-fragment | NA    | 0     |
| S8_vo_k141_164422  full   | 2651  | No  | NA    | 1  | 0           | Low-quality     | Genome-fragment | 4.58  | 0     |
| S16_vo_4471  full         | 8671  | No  | NA    | 0  | 1           | Not-determined  | Genome-fragment | NA    | 0     |
| S9_vo_k141_26724  full    | 2652  | Yes | 449   | 1  | 2           | Low-quality     | Genome-fragment | 1.43  | 83.07 |
| S3_extracted_k141_17702   | 2652  | No  | NA    | 1  | 0           | Low-quality     | Genome-fragment | 2.7   | 0     |
| S16_vo_4229  full         | 3353  | No  | NA    | 0  | 1           | Not-determined  | Genome-fragment | NA    | 0     |
| S16_vo_4361  full         | 1248  | No  | NA    | 0  | 2           | Not-determined  | Genome-fragment | NA    | 0     |
| S6_vo_k141_53640  full    | 2652  | No  | NA    | 3  | 0           | Low-quality     | Genome-fragment | 4.41  | 0     |
| S9_vo_k141_69738  full    | 2653  | No  | NA    | 1  | 0           | Low-quality     | Genome-fragment | 5.82  | 0     |
| S16_vo_104052  full       | 2653  | No  | NA    | 0  | 0           | Low-quality     | Genome-fragment | 3.22  | 0     |
| S16_vo_4548  full         | 2334  | No  | NA    | 0  | 1           | Not-determined  | Genome-fragment | NA    | 0     |
| S16_vo_4558  full         | 1795  | No  | NA    | 0  | 2           | Not-determined  | Genome-fragment | NA    |       |



|                            |       |     |    |    |    |                |                 |       |       |
|----------------------------|-------|-----|----|----|----|----------------|-----------------|-------|-------|
| S17_vs_k141_126012  full   | 2659  | No  | NA | 1  | 0  | Low-quality    | Genome-fragment | 5.39  | 0     |
| S3_extracted_k141_74911    | 2659  | No  | NA | 1  | 0  | Low-quality    | Genome-fragment | 3.37  | 0     |
| S16_vs_6526  full          | 1505  | No  | NA | 0  | 1  | Not-determined | Genome-fragment | NA    | 0     |
| S7_vs_132679  full         | 2659  | No  | NA | 1  | 0  | Low-quality    | Genome-fragment | 7.28  | 0     |
| S16_vs_163138  full        | 2659  | No  | NA | 1  | 0  | Low-quality    | Genome-fragment | 1.91  | 0     |
| S12_vs_k141_17109  full    | 2659  | No  | NA | 0  | 0  | Low-quality    | Genome-fragment | 6.53  | 0     |
| S16_vs_6585  full          | 1445  | No  | NA | 0  | 0  | Not-determined | Genome-fragment | NA    | 0     |
| S16_vs_6601  full          | 7268  | No  | NA | 0  | 5  | Not-determined | Genome-fragment | NA    | 0     |
| S16_vs_6601  full          | 1453  | No  | NA | 0  | 0  | Not-determined | Genome-fragment | NA    | 0     |
| S6_vs_k141_17497  full     | 2659  | No  | NA | 0  | 1  | Low-quality    | Genome-fragment | 3.06  | 0     |
| S16_vs_6882  full          | 1790  | No  | NA | 0  | 0  | Not-determined | Genome-fragment | NA    | 0     |
| S16_vs_6880  full          | 2130  | No  | NA | 0  | 2  | Not-determined | Genome-fragment | NA    | 0     |
| S16_vs_6905  full          | 1795  | No  | NA | 0  | 0  | Not-determined | Genome-fragment | NA    | 0     |
| S3_vs_k141_89702  full     | 2660  | No  | NA | 1  | 0  | Low-quality    | Genome-fragment | 1.55  | 0     |
| S16_vs_7050  full          | 4075  | No  | NA | 0  | 0  | Not-determined | Genome-fragment | NA    | 0     |
| S16_vs_7094  full          | 1748  | No  | NA | 0  | 2  | Not-determined | Genome-fragment | NA    | 0     |
| S12_extracted_k141_183552  | 2660  | No  | NA | 0  | 0  | Low-quality    | Genome-fragment | 2.45  | 0     |
| S16_vs_7379  full          | 2721  | No  | NA | 0  | 2  | Not-determined | Genome-fragment | NA    | 0     |
| S16_vs_7501  full          | 4307  | No  | NA | 0  | 2  | Not-determined | Genome-fragment | NA    | 0     |
| S16_vs_7566  full          | 3064  | No  | NA | 0  | 1  | Not-determined | Genome-fragment | NA    | 0     |
| S16_vs_7583  full          | 7780  | No  | NA | 0  | 4  | Not-determined | Genome-fragment | NA    | 0     |
| S16_vs_7756  full          | 4375  | No  | NA | 0  | 1  | Not-determined | Genome-fragment | NA    | 0     |
| S14_vs_k141_18163  1 2gene | 2661  | No  | NA | 2  | 0  | Low-quality    | Genome-fragment | 5.83  | 0     |
| S12_extracted_k141_25707   | 2661  | No  | NA | 0  | 0  | Low-quality    | Genome-fragment | 2.51  | 0     |
| S12_vs_k141_169783  full   | 2661  | No  | NA | 1  | 0  | Low-quality    | Genome-fragment | 0.92  | 0     |
| S9_vs_k141_13467  full     | 2662  | No  | NA | 0  | 0  | Low-quality    | Genome-fragment | 4.33  | 0     |
| S9_vs_k141_49551  full     | 2663  | No  | NA | 3  | 0  | Low-quality    | Genome-fragment | 7.15  | 0     |
| S5_vs_k141_108291  full    | 2663  | No  | NA | 2  | 0  | Low-quality    | Genome-fragment | 1.66  | 0     |
| S16_extracted_25482        | 2663  | No  | NA | 0  | 0  | Low-quality    | Genome-fragment | 3.93  | 0     |
| S17_extracted_k141_172087  | 2664  | No  | NA | 0  | 2  | Low-quality    | Genome-fragment | 0.99  | 0     |
| S16_vs_8412  full          | 2064  | No  | NA | 0  | 0  | Not-determined | Genome-fragment | NA    | 0     |
| S16_vs_8413  full          | 4596  | No  | NA | 0  | 1  | Not-determined | Genome-fragment | NA    | 0     |
| S9_vs_k141_9611  full      | 2664  | No  | NA | 0  | 0  | Low-quality    | Genome-fragment | 6.11  | 0     |
| S11_extracted_k141_3018    | 2664  | No  | NA | 0  | 0  | Low-quality    | Genome-fragment | 2.41  | 0     |
| S1_vs_k141_80950  full     | 2664  | No  | NA | 1  | 0  | Low-quality    | Genome-fragment | 6.38  | 0     |
| S5_vs_k141_09716  full     | 2664  | No  | NA | 0  | 0  | Low-quality    | Genome-fragment | 7.33  | 0     |
| S7_extracted_21872         | 2664  | No  | NA | 3  | 0  | Low-quality    | Genome-fragment | 9.4   | 0     |
| S16_vs_5726  full          | 2664  | Yes | NA | 1  | 1  | Low-quality    | Genome-fragment | 3.53  | 11.6  |
| S16_vs_8681  full          | 1365  | No  | NA | 1  | 1  | Not-determined | Genome-fragment | NA    | 0     |
| S17_extracted_k141_75280   | 2665  | No  | NA | 0  | 3  | Low-quality    | Genome-fragment | 0.98  | 0     |
| S17_extracted_k141_82586   | 2666  | No  | NA | 0  | 0  | Low-quality    | Genome-fragment | 6.69  | 0     |
| S16_vs_2052  full          | 1089  | No  | NA | 0  | 1  | Not-determined | Genome-fragment | NA    | 0     |
| S3_vs_k141_43272  full     | 2666  | No  | NA | 0  | 0  | Low-quality    | Genome-fragment | 1.47  | 0     |
| S16_vs_9193  full          | 5512  | No  | NA | 0  | 3  | Not-determined | Genome-fragment | NA    | 0     |
| S5_vs_k141_76860  full     | 2666  | No  | NA | 0  | 0  | Low-quality    | Genome-fragment | 7.12  | 0     |
| S16_vs_11535  full         | 2666  | No  | NA | 0  | 0  | Low-quality    | Genome-fragment | 7.72  | 0     |
| S12_vs_k141_1686  full     | 2666  | No  | NA | 2  | 0  | Low-quality    | Genome-fragment | 4.5   | 0     |
| S7_vs_1896  full           | 2667  | No  | NA | 1  | 0  | Low-quality    | Genome-fragment | 7.55  | 0     |
| S16_vs_5026  full          | 5346  | No  | NA | 2  | 2  | Not-determined | Genome-fragment | NA    | 0     |
| S3_vs_k141_108481  full    | 2668  | No  | NA | 0  | 1  | Low-quality    | Genome-fragment | 1.64  | 0     |
| S16_vs_9429  full          | 2910  | No  | NA | 0  | 3  | Not-determined | Genome-fragment | NA    | 0     |
| S16_vs_5530  full          | 1496  | No  | NA | 0  | 1  | Not-determined | Genome-fragment | NA    | 0     |
| S16_vs_39354  full         | 2668  | No  | NA | 0  | 1  | Low-quality    | Genome-fragment | 1.35  | 0     |
| S16_vs_9722  full          | 6645  | No  | NA | 0  | 5  | Not-determined | Genome-fragment | NA    | 0     |
| S6_vs_k141_8642  1 2gene   | 2668  | No  | NA | 0  | 0  | Low-quality    | Genome-fragment | NA    | 7.78  |
| S16_vs_9869  full          | 9320  | No  | NA | 0  | 2  | Not-determined | Genome-fragment | NA    | 0     |
| S16_vs_9906  full          | 1568  | No  | NA | 0  | 0  | Not-determined | Genome-fragment | NA    | 0     |
| S16_vs_9918  full          | 5335  | No  | NA | 0  | 0  | Not-determined | Genome-fragment | NA    | 0     |
| S16_vs_5981  full          | 2641  | No  | NA | 0  | 0  | Not-determined | Genome-fragment | NA    | 0     |
| S17_extracted_k141_70564   | 2669  | No  | NA | 0  | 0  | Low-quality    | Genome-fragment | 6.31  | 0     |
| S16_vs_10146  full         | 1091  | No  | NA | 0  | 1  | Not-determined | Genome-fragment | NA    | 7.16  |
| S16_vs_k141_174955  full   | 2669  | No  | NA | 0  | 0  | Low-quality    | Genome-fragment | NA    | 0     |
| S16_vs_10252  full         | 9795  | No  | NA | 0  | 6  | Not-determined | Genome-fragment | NA    | 0     |
| S16_vs_10277  full         | 1693  | No  | NA | 0  | 1  | Not-determined | Genome-fragment | NA    | 0     |
| S14_vs_k141_27412  full    | 2669  | No  | NA | 0  | 0  | Low-quality    | Genome-fragment | 3.99  | 0     |
| S16_vs_10333  full         | 1601  | No  | NA | 0  | 2  | Not-determined | Genome-fragment | NA    | 0     |
| S16_vs_10432  full         | 1270  | No  | NA | 0  | 0  | Not-determined | Genome-fragment | NA    | 0     |
| S7_vs_32295  full          | 2669  | No  | NA | 1  | 0  | Low-quality    | Genome-fragment | 6.07  | 0     |
| S16_vs_10506  full         | 5269  | No  | NA | 0  | 0  | Not-determined | Genome-fragment | NA    | 0     |
| S16_vs_10569  full         | 1966  | No  | NA | 0  | 0  | Not-determined | Genome-fragment | NA    | 0     |
| S16_vs_10622  full         | 35184 | No  | NA | 9  | 1  | Medium-quality | Genome-fragment | 65.41 | 0     |
| S16_vs_10830  full         | 2377  | No  | NA | 1  | 1  | Not-determined | Genome-fragment | NA    | 0     |
| S7_vs_89479  full          | 2669  | No  | NA | 0  | 0  | Low-quality    | Genome-fragment | 4.32  | 0     |
| S12_vs_k141_80959  full    | 2669  | No  | NA | 1  | 0  | Low-quality    | Genome-fragment | 6.48  | 0     |
| S1_extracted_k141_92361    | 2670  | No  | NA | 2  | 0  | Low-quality    | Genome-fragment | 4.42  | 0     |
| S1_vs_k141_111865  full    | 2670  | Yes | NA | 2  | 1  | Low-quality    | Genome-fragment | 3.03  | 57.15 |
| S5_vs_k141_79560  1 2gene  | 2670  | No  | NA | 2  | 0  | Low-quality    | Genome-fragment | 7.27  | 0     |
| S16_vs_11163  full         | 3013  | No  | NA | 0  | 2  | Not-determined | Genome-fragment | NA    | 0     |
| S8_extracted_k141_117428   | 2670  | No  | NA | 0  | 0  | Low-quality    | Genome-fragment | NA    | 3.9   |
| S17_extracted_k141_51466   | 2671  | No  | NA | 0  | 2  | Low-quality    | Genome-fragment | 0.6   | 0     |
| S16_vs_11244  full         | 4965  | No  | NA | 0  | 1  | Not-determined | Genome-fragment | NA    | 0     |
| S16_vs_11557  full         | 3373  | No  | NA | 0  | 2  | Not-determined | Genome-fragment | NA    | 0     |
| S3_vs_k141_124735  full    | 2671  | No  | NA | 3  | 0  | Low-quality    | Genome-fragment | 6.92  | 0     |
| S16_vs_11649  full         | 4654  | No  | NA | 12 | 1  | High-quality   | Genome-fragment | 91.75 | 0     |
| S5_extracted_k141_23503    | 2671  | No  | NA | 1  | 0  | Low-quality    | Genome-fragment | 6.64  | 0     |
| S16_vs_11747  full         | 1212  | No  | NA | 0  | 1  | Not-determined | Genome-fragment | NA    | 0     |
| S5_vs_k141_71125  full     | 2671  | No  | NA | 3  | 0  | Low-quality    | Genome-fragment | 6.77  | 0     |
| S16_vs_11883  full         | 8994  | No  | NA | 0  | 8  | Not-determined | Genome-fragment | NA    | 0     |
| S16_vs_12141  full         | 6920  | No  | NA | 0  | 3  | Not-determined | Genome-fragment | NA    | 0     |
| S16_vs_12175  full         | 1153  | No  | NA | 0  | 2  | Not-determined | Genome-fragment | NA    | 0     |
| S16_vs_12228  full         | 1733  | No  | NA | 0  | 0  | Not-determined | Genome-fragment | NA    | 0     |
| S16_vs_12237  full         | 5971  | No  | NA | 0  | 3  | Not-determined | Genome-fragment | NA    | 0     |
| S7_extracted_137616        | 2671  | No  | NA | 1  | 0  | Low-quality    | Genome-fragment | 2.78  | 0     |
| S1_vs_k141_137264  full    | 2672  | No  | NA | 0  | 0  | Low-quality    | Genome-fragment | 5.43  | 0     |
| S7_vs_91001  full          | 2672  | No  | NA | 1  | 1  | Low-quality    | Genome-fragment | 1.33  | 35.82 |
| S16_vs_12477  full         | 2877  | No  | NA | 0  | 0  | Not-determined | Genome-fragment | NA    | 0     |
| S16_vs_1013701  full       | 2672  | No  | NA | 0  | 1  | Low-quality    | Genome-fragment | 1.49  | 0     |
| S16_vs_12620  full         | 3604  | No  | NA | 0  | 2  | Not-determined | Genome-fragment | NA    | 0     |
| S9_extracted_k141_2053     | 2673  | No  | NA | 0  | 1  | Low-quality    | Genome-fragment | 0.95  | 0     |
| S16_vs_12736  full         | 1097  | No  | NA | 0  | 1  | Not-determined | Genome-fragment | NA    | 0     |
| S16_vs_12741  full         | 11429 | No  | NA | 0  | 4  | Not-determined | Genome-fragment | NA    | 0     |
| S10_vs_60505  full         | 2673  | No  | NA | 0  | 0  | Low-quality    | Genome-fragment | 1.12  | 0     |
| S16_vs_12805  full         | 2144  | No  | NA | 0  | 2  | Not-determined | Genome-fragment | NA    | 0     |
| S10_vs_80589  full         | 2673  | No  | NA | 0  | 0  | Low-quality    | Genome-fragment | 2.93  | 0     |
| S16_vs_12863  full         | 5959  | No  | NA | 0  | 0  | Not-determined | Genome-fragment | NA    | 0     |
| S16_vs_12884  full         | 3164  | No  | NA | 0  | 1  | Not-determined | Genome-fragment | NA    | 0     |
| S10_vs_117499  full        | 2673  | No  | NA | 2  | 0  | Low-quality    | Genome-fragment | 1.67  | 0     |
| S16_vs_12949  full         | 6946  | No  | NA | 0  | 3  | Not-determined | Genome-fragment | NA    | 0     |
| S16_vs_12953  full         | 15423 | No  | NA | 10 | 2  | Not-determined | Genome-fragment | NA    | 0     |
| S16_vs_12990  full         | 1940  | No  | NA | 0  | 0  | Not-determined | Genome-fragment | NA    | 0     |
| S16_vs_13039  full         | 1601  | No  | NA | 0  | 0  | Not-determined | Genome-fragment | NA    | 0     |
| S16_vs_13146  full         | 3599  | No  | NA | 0  | 0  | Not-determined | Genome-fragment | NA    | 0     |
| S17_vs_k141_83583  full    | 2674  | No  | NA | 0  | 1  | Low-quality    | Genome-fragment | 5.81  | 0     |
| S16_vs_13242  full         | 4749  | No  | NA | 0  | 2  | Not-determined | Genome-fragment | NA    | 0     |
| S16_vs_13438  full         | 2384  | No  | NA | 0  | 1  | Not-determined | Genome-fragment | NA    | 0     |
| S13_vs_134737  full        | 2675  | No  | NA | 2  | 0  | Low-quality    | Genome-fragment | 5.92  | 0     |
| S14_vs_k141_67965  full    | 2675  | No  | NA | 3  | 0  | Low-quality    | Genome-fragment | 6.84  | 0     |
| S16_vs_13489  full         | 1221  | No  | NA | 0  | 3  | Not-determined | Genome-fragment | NA    | 0     |
| S3_extracted_k141_23043    | 2675  | No  | NA | 6  | 0  | Low-quality    | Genome-fragment | 8.77  | 0     |
| S7_vs_50981  full          | 2675  | No  | NA | 1  | 0  | Low-quality    | Genome-fragment | 6.51  | 0     |
| S16_vs_13677  full         | 10188 | No  | NA | 0  | 0  | Not-determined | Genome-fragment | NA    | 0     |
| S8_vs_k141_35501  full     | 2675  | No  | NA | 0  | 2  | Low-quality    | Genome-fragment | 0.77  | 0     |
| S16_vs_13708  full         | 1800  | No  | NA | 0  | 1  | Not-determined | Genome-fragment | NA    | 0     |
| S11_vs_k141_102230  full   | 2676  | No  | NA | 0  | 0  | Low-quality    | Genome-fragment | 3.97  | 0     |
| S16_vs_13782  full         | 1745  | No  | NA | 0  | 0  | Not-determined | Genome-fragment | NA    | 0     |
| S16_vs_13815  full         | 4568  | No  | NA | 0  | 3  | Not-determined | Genome-fragment | NA    | 0     |
| S12_extracted_k141_13941   | 2676  | No  | NA | 2  | 0  | Low-quality    | Genome-fragment | 5.05  | 0     |
| S17_extracted_k141_35809   | 2677  | No  | NA | 3  | 1  | Low-quality    | Genome-fragment | 2.07  | 0     |
| S16_vs_14032  full         | 6386  | No  | NA | 0  | 1  | Not-determined | Genome-fragment | NA    | 0     |
| S16_vs_14057  full         | 8073  | No  | NA | 0  | 2  | Not-determined | Genome-fragment | NA    | 0     |
| S5_vs_k141_43960  full     | 2677  | No  | NA | 0  | 0  | Low-quality    | Genome-fragment | 9.28  | 0     |
| S16_vs_14178  full         | 2062  | No  | NA | 0  | 0  | Not-determined | Genome-fragment | NA    | 0     |
| S16_extracted_43612        | 2677  | No  | NA | 0  | 0  | Low-quality    | Genome-fragment | 4.47  | 0     |
| S16_vs_145080  full        | 2677  | No  | NA | 1  | 0  | Low-quality    | Genome-fragment | 5.63  | 0     |
| S17_extracted_k141_14654   | 2678  | No  | NA | 0  | 3  | Low-quality    | Genome-fragment | 6.29  | 0     |
| S17_vs_k141_126040  full   | 2678  | No  | NA | 1  | 0  | Low-quality    | Genome-fragment | 7.36  | 0     |
| S15_extracted_35860        | 2678  | No  | NA | 1  | 0  | Low-quality    | Genome-fragment | 6.9   | 0     |
| S16_vs_14602  full         | 3021  | No  | NA | 0  | 1  | Not-determined | Genome-fragment | NA    | 0     |
| S5_vs_k141_45551  full     | 2679  | No  | NA | 0  | 1  | Low-quality    | Genome-fragment | 5.74  | 0     |
| S7_extracted_69527         | 2679  | No  | NA | 4  | 0  | Low-quality    | Genome-fragment | 4.78  | 0     |
| S7_vs_29391  full          | 2679  | No  | NA | 0  | 0  | Low-quality    | Genome-fragment | 4.41  | 0     |
| S10_vs_45670  full         | 2679  | No  | NA | 0  | 0  | Low-quality    | Genome-fragment | 5.31  | 0     |
| S11_vs_k141_48979  full    | 2680  | No  | NA | 1  | 0  | Low-quality    | Genome-fragment | 3.77  | 0     |
| S11_extracted_k141_102733  | 2680  | No  | NA | 0  | 0  | Low-quality    | Genome-fragment | 5.03  | 0     |
| S16_vs_15193  full         | 3500  | No  | NA | 0  | 2  | Not-determined | Genome-fragment | NA    | 0     |
| S14_vs_k141_92918  full    | 2681  | No  | NA | 3  | 0  | Low-quality    | Genome-fragment | 6.33  | 0     |
| S16_vs_15229  full         | 10594 | No  | NA | 0  | 10 | Not-determined | Genome-fragment |       |       |



|                           |       |     |       |    |    |                |                 |    |       |
|---------------------------|-------|-----|-------|----|----|----------------|-----------------|----|-------|
| S16_vo_16492              | 1694  | No  | NA    | 0  | 1  | Not-determined | Genome-fragment | NA | 0     |
| S16_vo_16510              | 9147  | No  | NA    | 2  | 4  | Not-determined | Genome-fragment | NA | 0     |
| S3_vo_k141_117884         | 2685  | No  | NA    | 0  | 0  | Low-quality    | Genome-fragment | NA | 5.45  |
| S16_vo_16628              | 1405  | No  | NA    | 0  | 0  | Not-determined | Genome-fragment | NA | 0     |
| S4_vo_ViSSEr_22024-cat_2  | 2685  | No  | NA    | 8  | 0  | Low-quality    | Genome-fragment | NA | 8.83  |
| S16_vo_16771              | 2093  | No  | NA    | 0  | 1  | Not-determined | Genome-fragment | NA | 0     |
| S16_vo_16785              | 8443  | No  | NA    | 0  | 3  | Not-determined | Genome-fragment | NA | 0     |
| S16_vo_16847              | 6777  | No  | NA    | 0  | 0  | Not-determined | Genome-fragment | NA | 0     |
| S16_vo_17030              | 1102  | No  | NA    | 0  | 1  | Not-determined | Genome-fragment | NA | 96.99 |
| S16_vo_17072              | 2852  | No  | NA    | 0  | 1  | Not-determined | Genome-fragment | NA | 0     |
| S11_vo_k141_83516         | 2686  | No  | NA    | 1  | 0  | Low-quality    | Genome-fragment | NA | 4.47  |
| S14_extracted_k141_90297  | 2686  | No  | NA    | 5  | 0  | Low-quality    | Genome-fragment | NA | 6.79  |
| S11_vo_k141_38322         | 2687  | No  | NA    | 1  | 0  | Low-quality    | Genome-fragment | NA | 6.19  |
| S16_vo_17318              | 1328  | No  | NA    | 0  | 1  | Not-determined | Genome-fragment | NA | 0     |
| S14_vo_k141_94036         | 2687  | No  | NA    | 0  | 0  | Low-quality    | Genome-fragment | NA | 2.55  |
| S16_vo_17473              | 1260  | No  | NA    | 0  | 1  | Not-determined | Genome-fragment | NA | 0     |
| S14_vo_k141_101524        | 2687  | No  | NA    | 0  | 0  | Low-quality    | Genome-fragment | NA | 2.47  |
| S16_vo_8431               | 2687  | No  | NA    | 0  | 2  | Low-quality    | Genome-fragment | NA | 9.01  |
| S16_vo_17493              | 20552 | No  | NA    | 0  | 0  | Medium-quality | Genome-fragment | NA | 74.21 |
| S10_vo_27785              | 2687  | No  | NA    | 0  | 0  | Low-quality    | Genome-fragment | NA | 4.42  |
| S16_vo_17502              | 1884  | No  | NA    | 0  | 2  | Not-determined | Genome-fragment | NA | 2.18  |
| S12_vo_k141_42091         | 2687  | No  | NA    | 0  | 2  | Low-quality    | Genome-fragment | NA | 0     |
| S16_vo_17634              | 1054  | No  | NA    | 0  | 0  | Not-determined | Genome-fragment | NA | 0     |
| S16_vo_17722              | 1131  | No  | NA    | 0  | 0  | Not-determined | Genome-fragment | NA | 0     |
| S16_vo_17817              | 14787 | No  | NA    | 0  | 5  | Not-determined | Genome-fragment | NA | 0     |
| S16_vo_17898              | 2180  | No  | NA    | 0  | 2  | Not-determined | Genome-fragment | NA | 0     |
| S13_extracted_38433       | 2688  | No  | NA    | 0  | 1  | Low-quality    | Genome-fragment | NA | 5.08  |
| S16_vo_17920              | 7811  | No  | NA    | 0  | 7  | Not-determined | Genome-fragment | NA | 6.95  |
| S8_extracted_k141_115790  | 2688  | No  | NA    | 0  | 0  | Low-quality    | Genome-fragment | NA | 0     |
| S16_vo_18189              | 2251  | No  | NA    | 0  | 2  | Not-determined | Genome-fragment | NA | 0     |
| S16_vo_18207              | 1200  | No  | NA    | 0  | 0  | Not-determined | Genome-fragment | NA | 5.62  |
| S9_extracted_k141_17742   | 2689  | No  | NA    | 0  | 0  | Low-quality    | Genome-fragment | NA | 65.09 |
| S16_vo_18293              | 31073 | No  | NA    | 15 | 1  | Medium-quality | Genome-fragment | NA | 0     |
| S7_extracted_17364        | 2689  | No  | NA    | 1  | 0  | Low-quality    | Genome-fragment | NA | 4.7   |
| S14_extracted_k141_8928   | 2690  | No  | NA    | 0  | 2  | Low-quality    | Genome-fragment | NA | 1.45  |
| S16_vo_18440              | 50518 | No  | NA    | 20 | 3  | High-quality   | Genome-fragment | NA | 5.47  |
| S3_vo_k141_41522          | 2690  | No  | NA    | 2  | 0  | Low-quality    | Genome-fragment | NA | 9.43  |
| S16_vo_18561              | 5183  | No  | NA    | 0  | 4  | Not-determined | Genome-fragment | NA | 6.68  |
| S5_vo_k141_16073          | 2690  | No  | NA    | 1  | 1  | Low-quality    | Genome-fragment | NA | 1.3   |
| S7_vo_134950              | 2690  | No  | NA    | 2  | 0  | Low-quality    | Genome-fragment | NA | 5.19  |
| S16_vo_18744              | 1392  | No  | NA    | 0  | 2  | Not-determined | Genome-fragment | NA | 6.35  |
| S12_vo_k141_122181        | 2690  | No  | NA    | 0  | 3  | Low-quality    | Genome-fragment | NA | 6.45  |
| S16_vo_32113              | 2690  | No  | NA    | 0  | 1  | Low-quality    | Genome-fragment | NA | 6.61  |
| S9_vo_k141_73328          | 2691  | No  | NA    | 2  | 0  | Low-quality    | Genome-fragment | NA | 1.76  |
| S16_vo_18885              | 1263  | No  | NA    | 0  | 0  | Not-determined | Genome-fragment | NA | 2.04  |
| S9_vo_k141_54846          | 2692  | No  | NA    | 0  | 0  | Low-quality    | Genome-fragment | NA | 0     |
| S9_vo_k141_71737          | 2692  | No  | NA    | 2  | 0  | Low-quality    | Genome-fragment | NA | 0     |
| S11_vo_k141_13824         | 2692  | No  | NA    | 0  | 0  | Low-quality    | Genome-fragment | NA | 0     |
| S16_vo_19049              | 3312  | No  | NA    | 0  | 8  | Not-determined | Genome-fragment | NA | 0     |
| S5_vo_k141_125051         | 2692  | No  | NA    | 1  | 0  | Low-quality    | Genome-fragment | NA | 0     |
| S16_vo_19159              | 9212  | No  | NA    | 0  | 5  | Not-determined | Genome-fragment | NA | 0     |
| S16_vo_19259              | 30679 | No  | NA    | 0  | 3  | Not-determined | Genome-fragment | NA | 69.62 |
| S16_vo_19320              | 29199 | No  | NA    | 10 | 0  | Medium-quality | Genome-fragment | NA | 3.94  |
| S9_vo_k141_88083          | 2693  | No  | NA    | 0  | 3  | Low-quality    | Genome-fragment | NA | 6.32  |
| S2_vo_k141_76793          | 2693  | No  | NA    | 2  | 0  | Low-quality    | Genome-fragment | NA | 0.89  |
| S12_vo_k141_73867         | 2693  | No  | NA    | 0  | 0  | Low-quality    | Genome-fragment | NA | 0     |
| S16_vo_19502              | 3230  | No  | NA    | 0  | 2  | Not-determined | Genome-fragment | NA | 0     |
| S16_vo_19607              | 6181  | No  | NA    | 0  | 5  | Not-determined | Genome-fragment | NA | 6.15  |
| S17_vo_k141_162938        | 2694  | No  | NA    | 0  | 0  | Low-quality    | Genome-fragment | NA | 2.94  |
| S1_extracted_k141_128172  | 2694  | No  | NA    | 0  | 2  | Low-quality    | Genome-fragment | NA | 0     |
| S16_vo_19879              | 3241  | No  | NA    | 0  | 2  | Not-determined | Genome-fragment | NA | 0     |
| S16_vo_19938              | 6688  | No  | NA    | 0  | 3  | Not-determined | Genome-fragment | NA | 0     |
| S16_vo_19968              | 54417 | Yes | 34564 | 10 | 14 | Medium-quality | Genome-fragment | NA | 83    |
| S10_vo_61582              | 2694  | No  | NA    | 0  | 0  | Medium-quality | Genome-fragment | NA | 4.87  |
| S17_extracted_k141_177090 | 2695  | No  | NA    | 0  | 0  | Low-quality    | Genome-fragment | NA | 5.13  |
| S17_vo_k141_128771        | 2695  | No  | NA    | 1  | 0  | Low-quality    | Genome-fragment | NA | 6.2   |
| S16_vo_20046              | 1350  | No  | NA    | 0  | 0  | Not-determined | Genome-fragment | NA | 0     |
| S9_vo_k141_12470          | 2695  | No  | NA    | 0  | 1  | Low-quality    | Genome-fragment | NA | 5.96  |
| S16_vo_20164              | 3349  | No  | NA    | 0  | 2  | Not-determined | Genome-fragment | NA | 6.14  |
| S8_vo_k141_175248         | 2695  | No  | NA    | 3  | 0  | Low-quality    | Genome-fragment | NA | 0     |
| S16_vo_20356              | 1944  | No  | NA    | 0  | 2  | Not-determined | Genome-fragment | NA | 0     |
| S16_vo_20394              | 2520  | No  | NA    | 0  | 2  | Not-determined | Genome-fragment | NA | 0     |
| S16_vo_20420              | 2647  | No  | NA    | 0  | 0  | Not-determined | Genome-fragment | NA | 6.31  |
| S1_vo_k141_130164         | 2696  | No  | NA    | 5  | 0  | Low-quality    | Genome-fragment | NA | 0     |
| S16_vo_20453              | 1163  | No  | NA    | 1  | 1  | Not-determined | Genome-fragment | NA | 0     |
| S16_vo_20470              | 1481  | No  | NA    | 0  | 0  | Not-determined | Genome-fragment | NA | 0     |
| S16_vo_20715              | 3312  | No  | NA    | 0  | 2  | Not-determined | Genome-fragment | NA | 0     |
| S16_vo_20721              | 3305  | No  | NA    | 0  | 3  | Not-determined | Genome-fragment | NA | 5.8   |
| S7_vo_21984               | 2696  | No  | NA    | 0  | 0  | Low-quality    | Genome-fragment | NA | 0     |
| S16_vo_20781              | 1911  | No  | NA    | 0  | 0  | Not-determined | Genome-fragment | NA | 1.83  |
| S16_vo_20814              | 1667  | No  | NA    | 0  | 1  | Not-determined | Genome-fragment | NA | 3.7   |
| S11_vo_k141_53877         | 2697  | No  | NA    | 0  | 0  | Low-quality    | Genome-fragment | NA | 0     |
| S13_vo_125508             | 2697  | No  | NA    | 0  | 1  | Low-quality    | Genome-fragment | NA | 0     |
| S16_vo_20957              | 3155  | No  | NA    | 0  | 2  | Not-determined | Genome-fragment | NA | 2.1   |
| S16_vo_24575              | 2697  | No  | NA    | 0  | 0  | Low-quality    | Genome-fragment | NA | 0     |
| S16_vo_21055              | 3031  | No  | NA    | 0  | 0  | Not-determined | Genome-fragment | NA | 0     |
| S16_vo_21098              | 3751  | No  | NA    | 0  | 1  | Not-determined | Genome-fragment | NA | 5.73  |
| S8_extracted_k141_13392   | 2697  | No  | NA    | 0  | 0  | Low-quality    | Genome-fragment | NA | 0     |
| S16_vo_21326              | 1136  | No  | NA    | 1  | 2  | Not-determined | Genome-fragment | NA | 0     |
| S16_vo_21352              | 6078  | No  | NA    | 0  | 3  | Not-determined | Genome-fragment | NA | 6.9   |
| S16_vo_21361              | 3496  | No  | NA    | 0  | 0  | Not-determined | Genome-fragment | NA | 0     |
| S8_vo_k141_180392         | 2697  | No  | NA    | 0  | 0  | Low-quality    | Genome-fragment | NA | 0     |
| S16_vo_21408              | 2924  | No  | NA    | 0  | 1  | Not-determined | Genome-fragment | NA | 0     |
| S16_vo_21414              | 4318  | No  | NA    | 0  | 1  | Not-determined | Genome-fragment | NA | 1.78  |
| S16_vo_21438              | 1551  | No  | NA    | 0  | 0  | Not-determined | Genome-fragment | NA | 0     |
| S17_vo_k141_147818        | 2698  | No  | NA    | 0  | 2  | Low-quality    | Genome-fragment | NA | 0     |
| S16_vo_21627              | 2221  | No  | NA    | 0  | 1  | Not-determined | Genome-fragment | NA | 0     |
| S16_vo_21639              | 1780  | No  | NA    | 0  | 1  | Not-determined | Genome-fragment | NA | 0     |
| S16_vo_21674              | 1719  | No  | NA    | 0  | 3  | Not-determined | Genome-fragment | NA | 0     |
| S16_vo_21750              | 1472  | No  | NA    | 0  | 0  | Not-determined | Genome-fragment | NA | 0     |
| S16_vo_21775              | 6902  | No  | NA    | 0  | 4  | Not-determined | Genome-fragment | NA | 4.86  |
| S11_vo_k141_86079         | 2698  | No  | NA    | 0  | 0  | Low-quality    | Genome-fragment | NA | 8.89  |
| S3_extracted_k141_26019   | 2698  | No  | NA    | 6  | 0  | Low-quality    | Genome-fragment | NA | 0     |
| S16_vo_21979              | 1898  | No  | NA    | 0  | 1  | Not-determined | Genome-fragment | NA | 0     |
| S16_vo_21994              | 2373  | No  | NA    | 0  | 0  | Not-determined | Genome-fragment | NA | 6.68  |
| S16_vo_166642             | 2698  | No  | NA    | 2  | 0  | Low-quality    | Genome-fragment | NA | 5.91  |
| S16_vo_22321              | 18630 | No  | NA    | 0  | 8  | Not-determined | Genome-fragment | NA | 8.9   |
| S12_vo_k141_33247         | 2698  | No  | NA    | 5  | 0  | Low-quality    | Genome-fragment | NA | 0     |
| S16_vo_22404              | 2106  | No  | NA    | 0  | 1  | Not-determined | Genome-fragment | NA | 6.74  |
| S6_extracted_k141_53780   | 2698  | No  | NA    | 5  | 0  | Low-quality    | Genome-fragment | NA | 2.53  |
| S16_vo_22447              | 1377  | No  | NA    | 0  | 2  | Not-determined | Genome-fragment | NA | 4.49  |
| S16_vo_22637              | 3716  | No  | NA    | 0  | 0  | Not-determined | Genome-fragment | NA | 0     |
| S16_extracted_23758       | 2699  | No  | NA    | 0  | 0  | Low-quality    | Genome-fragment | NA | 0     |
| S16_vo_22702              | 1404  | No  | NA    | 0  | 0  | Not-determined | Genome-fragment | NA | 4.49  |
| S16_vo_22808              | 1244  | No  | NA    | 0  | 0  | Not-determined | Genome-fragment | NA | 0     |
| S16_vo_22869              | 2676  | No  | NA    | 0  | 0  | Not-determined | Genome-fragment | NA | 0     |
| S12_vo_k141_26645         | 2699  | No  | NA    | 0  | 0  | Low-quality    | Genome-fragment | NA | 0     |
| S16_vo_23058              | 1255  | No  | NA    | 0  | 2  | Not-determined | Genome-fragment | NA | 0     |
| S16_vo_23115              | 1441  | No  | NA    | 0  | 0  | Not-determined | Genome-fragment | NA | 6.74  |
| S8_vo_k141_153251         | 2700  | No  | NA    | 2  | 0  | Low-quality    | Genome-fragment | NA | 0     |
| S16_vo_23269              | 1629  | No  | NA    | 0  | 0  | Not-determined | Genome-fragment | NA | 0     |
| S8_vo_k141_173276         | 2700  | No  | NA    | 0  | 0  | Low-quality    | Genome-fragment | NA | 4.41  |
| S16_vo_23374              | 2900  | No  | NA    | 0  | 0  | Not-determined | Genome-fragment | NA | 0     |
| S12_vo_k141_140621        | 2701  | No  | NA    | 0  | 0  | Low-quality    | Genome-fragment | NA | 0     |
| S16_vo_23405              | 1518  | No  | NA    | 0  | 0  | Not-determined | Genome-fragment | NA | 0     |
| S16_vo_23511              | 2238  | No  | NA    | 0  | 1  | Not-determined | Genome-fragment | NA | 0     |
| S16_vo_23550              | 3183  | No  | NA    | 0  | 3  | Not-determined | Genome-fragment | NA | 1.91  |
| S16_vo_23565              | 3611  | No  | NA    | 0  | 2  | Not-determined | Genome-fragment | NA | 6.97  |
| S16_vo_23649              | 2745  | No  | NA    | 0  | 3  | Not-determined | Genome-fragment | NA | 5.64  |
| S8_vo_k141_33361          | 2701  | No  | NA    | 0  | 0  | Low-quality    | Genome-fragment | NA | 1.61  |
| S16_vo_23808              | 1547  | No  | NA    | 0  | 0  | Not-determined | Genome-fragment | NA | 0     |
| S5_vo_k141_49327          | 2702  | No  | NA    | 1  | 0  | Low-quality    | Genome-fragment | NA | 0     |
| S7_vo_50090               | 2702  | No  | NA    | 2  | 0  | Low-quality    | Genome-fragment | NA | 0     |
| S16_vo_23853              | 6546  | No  | NA    | 0  | 0  | Not-determined | Genome-fragment | NA | 0     |
| S7_vo_113787              | 2702  | No  | NA    | 0  | 1  | Low-quality    | Genome-fragment | NA | 0     |
| S16_vo_23981              | 1231  | No  | NA    | 0  | 1  | Not-determined | Genome-fragment | NA | 0     |
| S16_vo_24017              | 2478  | No  | NA    | 0  | 0  | Not-determined | Genome-fragment | NA | 4.33  |
| S16_vo_117299             | 2702  | No  | NA    | 1  | 0  | Low-quality    | Genome-fragment | NA | 6.71  |
| S8_vo_k141_151863         | 2702  | No  | NA    | 0  | 1  | Low-quality    | Genome-fragment | NA | 8.89  |
| S14_extracted_k141_82227  | 2703  | No  | NA    | 2  | 0  | Low-quality    | Genome-fragment | NA | 1.93  |
| S5_vo_k141_82932          | 2703  | No  | NA    | 1  | 0  | Low-quality    | Genome-fragment | NA | 3.97  |
| S7_extracted_56922        | 2703  | No  | NA    | 0  | 0  | Low-quality    | Genome-fragment | NA | 5.06  |
| S16_extracted_395         | 2703  | No  | NA    | 1  | 0  | Low-quality    | Genome-fragment | NA | 1.92  |
| S16_vo_24484              | 1303  | No  | NA    | 0  | 2  | Not-determined | Genome-fragment | NA | 5.86  |
| S12_extracted_k141_145998 | 2703  | No  | NA    | 0  | 0  | Low-quality    | Genome-fragment | NA | 0     |
| S7_vo_80843               | 2704  | No  | NA    | 3  | 0  | Low-quality    | Genome-fragment | NA | 0     |
| S16_vo_24785              | 2449  | No  | NA    | 0  | 2  | Not-determined | Genome-fragment | NA | 0     |
| S16_vo_24891              | 4096  | No  | NA    | 0  | 0  | Not-determined | Genome-fragment | NA | 0     |
| S16_vo_24999              | 5231  | No  | NA    |    |    |                |                 |    |       |



|                           |       |     |       |    |    |                |                 |    |       |
|---------------------------|-------|-----|-------|----|----|----------------|-----------------|----|-------|
| S16_v2_26372              | 6033  | No  | NA    | 0  | 4  | Not-determined | Genome-fragment | NA | 0     |
| S16_v2_26459              | 3146  | No  | NA    | 1  | 1  | Not-determined | Genome-fragment | NA | 0     |
| S16_v2_26499              | 2450  | No  | NA    | 0  | 0  | Not-determined | Genome-fragment | NA | 0     |
| S16_v2_26634              | 1015  | No  | NA    | 0  | 0  | Not-determined | Genome-fragment | NA | 0     |
| S16_v2_26744              | 1731  | No  | NA    | 0  | 1  | Not-determined | Genome-fragment | NA | 0     |
| S1_extracted_k141_4973    | 2708  | No  | NA    | 0  | 3  | Low-quality    | Genome-fragment | NA | 0.99  |
| S16_v2_26837              | 4768  | No  | NA    | 0  | 5  | Not-determined | Genome-fragment | NA | 0     |
| S16_v2_15405              | 2708  | No  | NA    | 1  | 0  | Low-quality    | Genome-fragment | NA | 5.62  |
| S16_v2_17006              | 1808  | No  | NA    | 1  | 1  | Not-determined | Genome-fragment | NA | 0     |
| S16_v2_27124              | 1255  | No  | NA    | 0  | 0  | Not-determined | Genome-fragment | NA | 0     |
| S16_v2_148580             | 2708  | No  | NA    | 1  | 0  | Low-quality    | Genome-fragment | NA | 7.82  |
| S16_v2_27209              | 3411  | No  | NA    | 0  | 1  | Not-determined | Genome-fragment | NA | 0     |
| S16_v2_27210              | 1632  | No  | NA    | 0  | 1  | Not-determined | Genome-fragment | NA | 0     |
| S16_v2_150252             | 2708  | No  | NA    | 2  | 0  | Low-quality    | Genome-fragment | NA | 9.52  |
| S16_v2_27250              | 5700  | No  | NA    | 0  | 0  | Not-determined | Genome-fragment | NA | 0     |
| S16_v2_27361              | 2913  | No  | NA    | 0  | 3  | Not-determined | Genome-fragment | NA | 0     |
| S16_v2_27387              | 1985  | No  | NA    | 0  | 0  | Not-determined | Genome-fragment | NA | 0     |
| S16_v2_164221             | 2708  | No  | NA    | 0  | 1  | Low-quality    | Genome-fragment | NA | 1.56  |
| S16_v2_27420              | 6273  | No  | NA    | 0  | 4  | Not-determined | Genome-fragment | NA | 0     |
| S12_v2_k141_38912         | 2708  | No  | NA    | 1  | 0  | Low-quality    | Genome-fragment | NA | 6.97  |
| S16_v2_27598              | 3095  | No  | NA    | 0  | 1  | Not-determined | Genome-fragment | NA | 0     |
| S15_v2_27228              | 2708  | No  | NA    | 1  | 0  | Low-quality    | Genome-fragment | NA | 5.88  |
| S3_v2_k141_80725          | 2709  | No  | NA    | 1  | 0  | Low-quality    | Genome-fragment | NA | 1.77  |
| S3_v2_k141_6079           | 2709  | No  | NA    | 1  | 0  | Low-quality    | Genome-fragment | NA | 8     |
| S7_v2_60881               | 2709  | No  | NA    | 1  | 0  | Low-quality    | Genome-fragment | NA | 6.99  |
| S16_v2_27777              | 1847  | No  | NA    | 0  | 0  | Not-determined | Genome-fragment | NA | 0     |
| S11_v2_k141_69560         | 2711  | No  | NA    | 0  | 0  | Low-quality    | Genome-fragment | NA | 4.43  |
| S16_v2_27829              | 2387  | No  | NA    | 0  | 3  | Not-determined | Genome-fragment | NA | 0     |
| S12_v2_114670             | 2712  | No  | NA    | 0  | 0  | Low-quality    | Genome-fragment | NA | 1.82  |
| S7_v2_43575               | 2711  | No  | NA    | 0  | 2  | Low-quality    | Genome-fragment | NA | 4.09  |
| S11_extracted_k141_43211  | 2712  | No  | NA    | 0  | 0  | Low-quality    | Genome-fragment | NA | 1.05  |
| S3_v2_k141_57029          | 2712  | No  | NA    | 0  | 0  | Low-quality    | Genome-fragment | NA | 3.08  |
| S16_v2_159724             | 2712  | No  | NA    | 0  | 1  | Low-quality    | Genome-fragment | NA | 1.57  |
| S16_v2_28106              | 1413  | No  | NA    | 0  | 1  | Not-determined | Genome-fragment | NA | 0     |
| S16_v2_28175              | 2777  | No  | NA    | 0  | 0  | Not-determined | Genome-fragment | NA | 0     |
| S16_v2_28237              | 2588  | No  | NA    | 2  | 1  | Not-determined | Genome-fragment | NA | 0     |
| S10_v2_46593              | 2712  | No  | NA    | 3  | 0  | Low-quality    | Genome-fragment | NA | 4.57  |
| S8_extracted_k141_2037    | 2712  | No  | NA    | 1  | 0  | Low-quality    | Genome-fragment | NA | 3.82  |
| S16_v2_28249              | 6056  | No  | NA    | 1  | 4  | Not-determined | Genome-fragment | NA | 0     |
| S7_v2_21264               | 2713  | No  | NA    | 0  | 0  | Low-quality    | Genome-fragment | NA | 2.05  |
| S16_v2_28257              | 3467  | No  | NA    | 0  | 3  | Not-determined | Genome-fragment | NA | 0     |
| S16_v2_23214              | 2713  | No  | NA    | 0  | 0  | Low-quality    | Genome-fragment | NA | 18.46 |
| S16_v2_28368              | 4529  | No  | NA    | 0  | 1  | Not-determined | Genome-fragment | NA | 0     |
| S16_v2_28416              | 1185  | No  | NA    | 0  | 0  | Not-determined | Genome-fragment | NA | 0     |
| S16_v2_28540              | 4598  | No  | NA    | 0  | 1  | Not-determined | Genome-fragment | NA | 0     |
| S16_v2_28732              | 14671 | No  | NA    | 0  | 2  | Not-determined | Genome-fragment | NA | 0     |
| S3_extracted_k141_123846  | 2714  | No  | NA    | 4  | 0  | Low-quality    | Genome-fragment | NA | 4.49  |
| S8_v2_k141_65976          | 2714  | No  | NA    | 0  | 0  | Low-quality    | Genome-fragment | NA | 7.81  |
| S16_v2_28802              | 2560  | No  | NA    | 1  | 1  | Not-determined | Genome-fragment | NA | 0     |
| S8_v2_k141_190617         | 2714  | No  | NA    | 0  | 1  | Low-quality    | Genome-fragment | NA | 4.28  |
| S16_v2_28941              | 3584  | No  | NA    | 0  | 1  | Not-determined | Genome-fragment | NA | 0     |
| S16_v2_k141_54577         | 2715  | No  | NA    | 2  | 2  | Low-quality    | Genome-fragment | NA | 2.65  |
| S16_v2_29023              | 2318  | No  | NA    | 0  | 0  | Not-determined | Genome-fragment | NA | 0     |
| S16_v2_29137              | 6502  | No  | NA    | 0  | 0  | Not-determined | Genome-fragment | NA | 0     |
| S16_v2_29172              | 5185  | No  | NA    | 0  | 2  | Not-determined | Genome-fragment | NA | 0     |
| S16_v2_29184              | 4344  | No  | NA    | 0  | 3  | Not-determined | Genome-fragment | NA | 0     |
| S17_v2_k141_46577         | 2715  | No  | NA    | 0  | 0  | Low-quality    | Genome-fragment | NA | 7.59  |
| S13_extracted_153205      | 2715  | No  | NA    | 0  | 2  | Low-quality    | Genome-fragment | NA | 0.85  |
| S16_v2_29521              | 1811  | No  | NA    | 0  | 1  | Not-determined | Genome-fragment | NA | 0     |
| S16_v2_29552              | 1914  | No  | NA    | 0  | 2  | Not-determined | Genome-fragment | NA | 0     |
| S14_extracted_k141_109827 | 2715  | No  | NA    | 2  | 0  | Low-quality    | Genome-fragment | NA | 1.47  |
| S16_v2_29583              | 30213 | No  | NA    | 5  | 1  | Not-determined | Genome-fragment | NA | 0     |
| S16_v2_29606              | 2863  | No  | NA    | 0  | 0  | Not-determined | Genome-fragment | NA | 0     |
| S14_v2_k141_65390         | 2715  | No  | NA    | 1  | 0  | Low-quality    | Genome-fragment | NA | 6.74  |
| S16_v2_29720              | 5112  | No  | NA    | 0  | 0  | Not-determined | Genome-fragment | NA | 0     |
| S16_v2_29737              | 3651  | No  | NA    | 0  | 0  | Not-determined | Genome-fragment | NA | 0     |
| S16_v2_29743              | 4031  | No  | NA    | 0  | 3  | Not-determined | Genome-fragment | NA | 0     |
| S5_v2_k141_99157          | 2715  | No  | NA    | 1  | 0  | Low-quality    | Genome-fragment | NA | 4.26  |
| S12_v2_k141_9091          | 2715  | No  | NA    | 0  | 0  | Low-quality    | Genome-fragment | NA | 1.3   |
| S9_v2_k141_62288          | 2716  | No  | NA    | 0  | 0  | Low-quality    | Genome-fragment | NA | 7.66  |
| S16_v2_30029              | 1157  | No  | NA    | 0  | 0  | Not-determined | Genome-fragment | NA | 0     |
| S16_v2_30034              | 13765 | No  | NA    | 10 | 1  | Not-determined | Genome-fragment | NA | 0     |
| S16_v2_30110              | 1238  | No  | NA    | 0  | 2  | Not-determined | Genome-fragment | NA | 0     |
| S12_v2_k141_95725         | 2716  | No  | NA    | 2  | 0  | Low-quality    | Genome-fragment | NA | 6.51  |
| S14_v2_k141_17694         | 2717  | No  | NA    | 1  | 1  | Low-quality    | Genome-fragment | NA | 4.33  |
| S16_v2_122866             | 2717  | No  | NA    | 0  | 0  | Low-quality    | Genome-fragment | NA | 2.18  |
| S8_v2_k141_158727         | 2717  | No  | NA    | 0  | 2  | Low-quality    | Genome-fragment | NA | 1.69  |
| S17_v2_k141_155779        | 2718  | No  | NA    | 0  | 2  | Low-quality    | Genome-fragment | NA | 2.57  |
| S3_v2_k141_51973          | 2718  | No  | NA    | 0  | 0  | Low-quality    | Genome-fragment | NA | 4.28  |
| S16_v2_30597              | 4601  | No  | NA    | 0  | 4  | Not-determined | Genome-fragment | NA | 0     |
| S16_v2_30700              | 1836  | No  | NA    | 0  | 0  | Not-determined | Genome-fragment | NA | 0     |
| S16_v2_30800              | 11274 | No  | NA    | 6  | 0  | Not-determined | Genome-fragment | NA | 0     |
| S16_v2_30929              | 2530  | No  | NA    | 0  | 2  | Not-determined | Genome-fragment | NA | 0     |
| S16_v2_31017              | 1177  | No  | NA    | 0  | 3  | Not-determined | Genome-fragment | NA | 0     |
| S16_v2_31155              | 3982  | No  | NA    | 0  | 0  | Not-determined | Genome-fragment | NA | 0     |
| S7_v2_64585               | 2718  | No  | NA    | 1  | 0  | Low-quality    | Genome-fragment | NA | 7.91  |
| S5_extracted_k141_68776   | 2719  | No  | NA    | 3  | 0  | Low-quality    | Genome-fragment | NA | 4.2   |
| S16_v2_31347              | 1847  | No  | NA    | 0  | 2  | Not-determined | Genome-fragment | NA | 0     |
| S16_v2_31456              | 1161  | No  | NA    | 1  | 1  | Not-determined | Genome-fragment | NA | 0     |
| S8_v2_k141_119558         | 2719  | No  | NA    | 0  | 1  | Low-quality    | Genome-fragment | NA | 1.56  |
| S7_v2_31280               | 2720  | No  | NA    | 2  | 0  | Low-quality    | Genome-fragment | NA | 6.13  |
| S16_v2_31832              | 1406  | No  | NA    | 1  | 1  | Not-determined | Genome-fragment | NA | 0     |
| S16_v2_31948              | 2158  | No  | NA    | 0  | 0  | Not-determined | Genome-fragment | NA | 0     |
| S8_v2_k141_17805          | 2720  | No  | NA    | 3  | 0  | Low-quality    | Genome-fragment | NA | 6.61  |
| S17_v2_k141_106833        | 2721  | No  | NA    | 0  | 0  | Low-quality    | Genome-fragment | NA | 2.35  |
| S7_v2_13726               | 2721  | No  | NA    | 0  | 0  | Low-quality    | Genome-fragment | NA | 5.71  |
| S11_extracted_k141_42022  | 2723  | No  | NA    | 2  | 0  | Low-quality    | Genome-fragment | NA | 2.91  |
| S16_v2_32151              | 1770  | No  | NA    | 0  | 0  | Not-determined | Genome-fragment | NA | 0     |
| S16_v2_32186              | 1733  | No  | NA    | 0  | 0  | Not-determined | Genome-fragment | NA | 0     |
| S14_v2_k141_22112         | 2723  | No  | NA    | 5  | 0  | Low-quality    | Genome-fragment | NA | 6.46  |
| S17_extracted_k141_80211  | 2724  | No  | NA    | 1  | 0  | Low-quality    | Genome-fragment | NA | 5.22  |
| S16_v2_32575              | 2747  | No  | NA    | 0  | 1  | Not-determined | Genome-fragment | NA | 0     |
| S7_v2_57825               | 2724  | No  | NA    | 0  | 0  | Low-quality    | Genome-fragment | NA | 6.25  |
| S10_v2_32613              | 1368  | No  | NA    | 0  | 2  | Not-determined | Genome-fragment | NA | 0     |
| S10_extracted_105331      | 2724  | No  | NA    | 0  | 0  | Low-quality    | Genome-fragment | NA | 4.71  |
| S16_v2_32761              | 2334  | No  | NA    | 0  | 1  | Not-determined | Genome-fragment | NA | 0     |
| S16_v2_32764              | 55386 | No  | NA    | 1  | 19 | Medium-quality | Genome-fragment | NA | 82.86 |
| S16_v2_32861              | 1574  | No  | NA    | 0  | 1  | Not-determined | Genome-fragment | NA | 0     |
| S16_v2_32871              | 1214  | No  | NA    | 1  | 1  | Not-determined | Genome-fragment | NA | 0     |
| S16_v2_32889              | 1579  | No  | NA    | 0  | 0  | Not-determined | Genome-fragment | NA | 0     |
| S12_v2_k141_167576        | 2724  | No  | NA    | 0  | 3  | Low-quality    | Genome-fragment | NA | 2.55  |
| S16_v2_33000              | 1786  | No  | NA    | 1  | 1  | Not-determined | Genome-fragment | NA | 0     |
| S12_extracted_k141_60439  | 2725  | No  | NA    | 1  | 0  | Low-quality    | Genome-fragment | NA | 8.35  |
| S16_v2_33109              | 1272  | No  | NA    | 0  | 0  | Not-determined | Genome-fragment | NA | 0     |
| S16_v2_33149              | 30646 | No  | NA    | 3  | 2  | Not-determined | Genome-fragment | NA | 0     |
| S16_v2_33180              | 1384  | No  | NA    | 0  | 0  | Not-determined | Genome-fragment | NA | 0     |
| S16_v2_33198              | 1605  | No  | NA    | 0  | 2  | Not-determined | Genome-fragment | NA | 0     |
| S16_v2_33270              | 8311  | No  | NA    | 0  | 3  | Not-determined | Genome-fragment | NA | 0     |
| S16_v2_33281              | 36572 | No  | NA    | 0  | 22 | Medium-quality | Genome-fragment | NA | 55.64 |
| S16_v2_33282              | 1515  | No  | NA    | 0  | 0  | Not-determined | Genome-fragment | NA | 0     |
| S8_extracted_k141_200611  | 2725  | No  | NA    | 0  | 0  | Low-quality    | Genome-fragment | NA | 2.92  |
| S16_v2_33351              | 1362  | No  | NA    | 0  | 1  | Not-determined | Genome-fragment | NA | 0     |
| S16_v2_33476              | 2391  | No  | NA    | 0  | 0  | Not-determined | Genome-fragment | NA | 0     |
| S8_v2_k141_167709         | 2725  | No  | NA    | 2  | 0  | Low-quality    | Genome-fragment | NA | 4.75  |
| S16_v2_33524              | 2803  | No  | NA    | 2  | 1  | Not-determined | Genome-fragment | NA | 0     |
| S3_v2_k141_104315         | 2726  | No  | NA    | 0  | 0  | Low-quality    | Genome-fragment | NA | 1.78  |
| S16_v2_33582              | 7247  | No  | NA    | 0  | 5  | Not-determined | Genome-fragment | NA | 0     |
| S16_v2_33607              | 3514  | No  | NA    | 2  | 1  | Not-determined | Genome-fragment | NA | 0     |
| S13_v2_37759              | 2728  | No  | NA    | 0  | 1  | Low-quality    | Genome-fragment | NA | 2.82  |
| S14_extracted_k141_93593  | 2728  | No  | NA    | 1  | 0  | Low-quality    | Genome-fragment | NA | 6.6   |
| S11_v2_k141_28933         | 2729  | No  | NA    | 0  | 3  | Low-quality    | Genome-fragment | NA | 1.6   |
| S1_extracted_k141_58502   | 2729  | No  | NA    | 0  | 1  | Low-quality    | Genome-fragment | NA | 0.24  |
| S16_v2_33793              | 3208  | No  | NA    | 0  | 1  | Not-determined | Genome-fragment | NA | 0     |
| S9_v2_k141_23174          | 2730  | No  | NA    | 1  | 0  | Low-quality    | Genome-fragment | NA | 7.93  |
| S16_v2_34019              | 4521  | No  | NA    | 0  | 1  | Not-determined | Genome-fragment | NA | 0     |
| S16_v2_34021              | 81863 | Yes | 31484 | 14 | 34 | Medium-quality | Genome-fragment | NA | 61.54 |
| S8_v2_k141_74927          | 2730  | No  | NA    | 0  | 0  | Low-quality    | Genome-fragment | NA | 4.63  |
| S16_v2_34121              | 2416  | No  | NA    | 0  | 1  | Not-determined | Genome-fragment | NA | 0     |
| S16_v2_34236              | 3427  | No  | NA    | 0  | 0  | Not-determined | Genome-fragment | NA | 0     |
| S16_v2_34241              | 1893  | No  | NA    | 0  | 1  | Not-determined | Genome-fragment | NA | 0     |
| S9_v2_k141_16452          | 2732  | No  | NA    | 1  | 0  | Low-quality    | Genome-fragment | NA | 4.44  |
| S5_v2_k141_69187          | 2732  | No  | NA    | 0  | 0  | Low-quality    | Genome-fragment | NA | 6.08  |
| S16_v2_34621              | 2732  | No  | NA    | 0  | 1  | Low-quality    | Genome-fragment | NA | 6.53  |
| S16_v2_34751              | 19964 | No  | NA    | 0  | 0  | Medium-quality | Genome-fragment | NA | 51.9  |
| S6_extracted_k141_20542   | 2732  | No  | NA    | 3  | 0  | Low-quality    | Genome-fragment | NA | 7.56  |
| S8_extracted_k141_135867  | 2732  | No  | NA    | 0  | 1  | Low-quality    | Genome-fragment | NA | 2.07  |
| S11_v2_k141_59547         | 2733  | No  | NA    | 0  | 0  | Low-quality    | Genome-fragment | NA | 2.51  |
| S7_extracted_595          | 2733  | No  | NA    | 0  | 0  | Low-quality    | Genome-fragment | NA | 1.38  |
| S16_v2_34885              | 1238  | No  | NA    | 0  | 0  |                |                 |    |       |



|                           |       |     |      |    |                |                 |                 |      |       |       |
|---------------------------|-------|-----|------|----|----------------|-----------------|-----------------|------|-------|-------|
| S16_v3_36339  full        | 1425  | No  | NA   | 0  | 0              | Not-determined  | Genome-fragment | NA   | 6.71  | 0     |
| S9_extracted_k141_30721   | 2735  | No  | NA   | 0  | 0              | Low-quality     | Genome-fragment | NA   | 7.22  | 0     |
| S16_v3_36481  full        | 1927  | No  | NA   | 0  | 0              | Not-determined  | Genome-fragment | NA   | 6.71  | 0     |
| S16_v3_36500  full        | 3849  | No  | NA   | 0  | 2              | Not-determined  | Genome-fragment | NA   | 6.71  | 0     |
| S7_v3_86840  full         | 2735  | No  | NA   | 3  | 0              | Low-quality     | Genome-fragment | NA   | 6.09  | 0     |
| S12_v3_k141_68061  full   | 2735  | No  | NA   | 3  | 0              | Low-quality     | Genome-fragment | NA   | 7.22  | 0     |
| S16_v3_36664  full        | 4483  | No  | NA   | 0  | 2              | Not-determined  | Genome-fragment | NA   | 6.71  | 0     |
| S2_v3_k141_2931  full     | 2735  | No  | NA   | 0  | 0              | Low-quality     | Genome-fragment | NA   | 4.98  | 0     |
| S9_v3_k141_63863  full    | 2736  | No  | NA   | 0  | 1              | Low-quality     | Genome-fragment | NA   | 3.98  | 0     |
| S16_v3_36799  full        | 2881  | No  | NA   | 0  | 0              | Not-determined  | Genome-fragment | NA   | 6.71  | 0     |
| S7_v3_10943  full         | 2736  | No  | NA   | 1  | 0              | Low-quality     | Genome-fragment | NA   | 6.51  | 0     |
| S16_v3_36142  full        | 2736  | No  | NA   | 0  | 0              | Low-quality     | Genome-fragment | NA   | 7.63  | 0     |
| S17_v3_k141_48870  full   | 2737  | No  | NA   | 0  | 0              | Low-quality     | Genome-fragment | NA   | 5.21  | 0     |
| S16_v3_36914  full        | 10177 | No  | NA   | 0  | 8              | Not-determined  | Genome-fragment | NA   | 6.71  | 0     |
| S16_v3_36942  full        | 3004  | No  | NA   | 0  | 1              | Not-determined  | Genome-fragment | NA   | 6.71  | 0     |
| S16_v3_37159  full        | 1114  | No  | NA   | 0  | 0              | Not-determined  | Genome-fragment | NA   | 6.71  | 0     |
| S16_v3_37207  full        | 9097  | No  | NA   | 0  | 2              | Not-determined  | Genome-fragment | NA   | 6.71  | 0     |
| S16_v3_37233  full        | 3535  | No  | NA   | 0  | 3              | Not-determined  | Genome-fragment | NA   | 6.71  | 0     |
| S14_v3_k141_23048  full   | 2737  | No  | NA   | 0  | 3              | Low-quality     | Genome-fragment | NA   | 4.12  | 0     |
| S16_v3_37300  full        | 16153 | No  | NA   | 0  | 2              | Not-determined  | Genome-fragment | NA   | 6.71  | 0     |
| S16_v3_37307  full        | 1902  | No  | NA   | 0  | 0              | Not-determined  | Genome-fragment | NA   | 6.71  | 0     |
| S16_v3_37361  full        | 6361  | No  | NA   | 0  | 2              | Not-determined  | Genome-fragment | NA   | 6.71  | 0     |
| S16_v3_37448  full        | 6379  | No  | NA   | 0  | 0              | Not-determined  | Genome-fragment | NA   | 6.71  | 0     |
| S1_v3_k141_91841  full    | 2737  | No  | NA   | 0  | 0              | Low-quality     | Genome-fragment | NA   | 1.76  | 0     |
| S16_v3_37599  full        | 1109  | No  | NA   | 0  | 1              | Not-determined  | Genome-fragment | NA   | 6.71  | 0     |
| S3_v3_k141_11708  full    | 2737  | No  | NA   | 1  | 0              | Low-quality     | Genome-fragment | NA   | 6     | 0     |
| S16_v3_37685  full        | 1521  | No  | NA   | 0  | 1              | Not-determined  | Genome-fragment | NA   | 6.71  | 0     |
| S10_v3_48809  full        | 2737  | No  | NA   | 0  | 1              | Low-quality     | Genome-fragment | NA   | 1.88  | 0     |
| S16_v3_37697  full        | 1557  | No  | NA   | 2  | Not-determined | Genome-fragment | NA              | 6.71 | 0     |       |
| S16_v3_37766  full        | 2696  | No  | NA   | 0  | 2              | Not-determined  | Genome-fragment | NA   | 6.71  | 0     |
| S16_v3_37780  full        | 1078  | No  | NA   | 0  | 1              | Not-determined  | Genome-fragment | NA   | 6.71  | 0     |
| S6_v3_k141_30048  full    | 2738  | No  | NA   | 0  | 0              | Low-quality     | Genome-fragment | NA   | 5.43  | 0     |
| S16_v3_37919  full        | 1049  | No  | NA   | 0  | 1              | Not-determined  | Genome-fragment | NA   | 6.71  | 0     |
| S16_v3_38105  full        | 1005  | No  | NA   | 0  | 0              | Not-determined  | Genome-fragment | NA   | 6.71  | 0     |
| S8_v3_k141_25504  full    | 2738  | No  | NA   | 0  | 0              | Low-quality     | Genome-fragment | NA   | 5.76  | 0     |
| S11_v3_k141_87531  full   | 2739  | No  | NA   | 0  | 0              | Low-quality     | Genome-fragment | NA   | 5.28  | 0     |
| S11_v3_k141_68442  full   | 2740  | No  | NA   | 3  | 0              | Low-quality     | Genome-fragment | NA   | 3.72  | 0     |
| S14_v3_k141_82611  full   | 2740  | No  | NA   | 1  | 0              | Low-quality     | Genome-fragment | NA   | 5.89  | 0     |
| S16_v3_38466  full        | 1018  | No  | NA   | 0  | 0              | Not-determined  | Genome-fragment | NA   | 6.71  | 0     |
| S16_v3_38503  full        | 1871  | No  | NA   | 0  | 1              | Not-determined  | Genome-fragment | NA   | 6.71  | 0     |
| S11_v3_k141_59962  full   | 2741  | No  | NA   | 0  | 2              | Low-quality     | Genome-fragment | NA   | 4.7   | 0     |
| S16_v3_38530  full        | 3050  | No  | NA   | 0  | 1              | Not-determined  | Genome-fragment | NA   | 6.71  | 0     |
| S16_v3_38536  full        | 1393  | No  | NA   | 0  | 2              | Not-determined  | Genome-fragment | NA   | 6.71  | 0     |
| S16_v3_38577  full        | 2870  | No  | NA   | 0  | 1              | Not-determined  | Genome-fragment | NA   | 6.71  | 0     |
| S2_v3_k141_51855  full    | 2741  | No  | NA   | 0  | 0              | Low-quality     | Genome-fragment | NA   | 6     | 0     |
| S5_v3_k141_37623  full    | 2741  | No  | NA   | 0  | 0              | Low-quality     | Genome-fragment | NA   | 7.04  | 0     |
| S16_v3_38711  full        | 2211  | No  | NA   | 0  | 2              | Not-determined  | Genome-fragment | NA   | 6.71  | 0     |
| S16_v3_38734  full        | 6023  | No  | NA   | 0  | 4              | Not-determined  | Genome-fragment | NA   | 6.71  | 0     |
| S16_v3_39518  full        | 2741  | No  | NA   | 0  | 0              | Low-quality     | Genome-fragment | NA   | 3.82  | 0     |
| S11_v3_k141_84750  full   | 2743  | No  | NA   | 0  | 0              | Low-quality     | Genome-fragment | NA   | 6.38  | 0     |
| S16_v3_38863  full        | 34794 | No  | NA   | 26 | 0              | Medium-quality  | Genome-fragment | NA   | 68.17 | 0     |
| S12_extracted_k141_165995 | 2743  | No  | NA   | 1  | 0              | Low-quality     | Genome-fragment | NA   | 5.48  | 0     |
| S16_v3_39028  full        | 3740  | No  | NA   | 0  | 0              | Not-determined  | Genome-fragment | NA   | 6.71  | 0     |
| S6_v3_k141_47358  full    | 2743  | No  | NA   | 1  | 0              | Low-quality     | Genome-fragment | NA   | 7.68  | 0     |
| S16_v3_39244  full        | 4489  | No  | NA   | 0  | 0              | Not-determined  | Genome-fragment | NA   | 6.71  | 0     |
| S16_v3_39300  full        | 1365  | No  | NA   | 0  | 1              | Not-determined  | Genome-fragment | NA   | 6.71  | 0     |
| S17_v3_k141_128460  full  | 2744  | No  | NA   | 0  | 0              | Low-quality     | Genome-fragment | NA   | 3.99  | 0     |
| S14_v3_k141_13133  full   | 2744  | No  | NA   | 0  | 0              | Low-quality     | Genome-fragment | NA   | 6.07  | 0     |
| S16_v3_39419  full        | 6370  | No  | NA   | 0  | 2              | Not-determined  | Genome-fragment | NA   | 6.71  | 0     |
| S8_v3_k141_206229  full   | 2744  | No  | NA   | 0  | 0              | Low-quality     | Genome-fragment | NA   | 5.47  | 0     |
| S11_extracted_k141_1942   | 2745  | No  | NA   | 1  | 0              | Low-quality     | Genome-fragment | NA   | 1.73  | 0     |
| S11_v3_k141_90379  full   | 2745  | No  | NA   | 0  | 0              | Low-quality     | Genome-fragment | NA   | 3.82  | 0     |
| S8_v3_k141_120041  full   | 2745  | Yes | 1430 | 1  | 1              | Low-quality     | Genome-fragment | NA   | 0.6   | 47.91 |
| S16_v3_39550  full        | 5303  | No  | NA   | 0  | 0              | Not-determined  | Genome-fragment | NA   | 6.71  | 0     |
| S16_v3_39552  full        | 1363  | No  | NA   | 0  | 0              | Not-determined  | Genome-fragment | NA   | 6.71  | 0     |
| S14_v3_k141_89537  full   | 2747  | No  | NA   | 1  | 0              | Low-quality     | Genome-fragment | NA   | 4.16  | 0     |
| S10_v3_96631  full        | 2747  | No  | NA   | 0  | 0              | Low-quality     | Genome-fragment | NA   | 5.81  | 0     |
| S16_v3_39858  full        | 1611  | No  | NA   | 0  | 1              | Not-determined  | Genome-fragment | NA   | 6.71  | 0     |
| S16_v3_39865  full        | 1172  | No  | NA   | 0  | 0              | Not-determined  | Genome-fragment | NA   | 6.71  | 0     |
| S17_v3_k141_48480  full   | 2748  | No  | NA   | 0  | 0              | Low-quality     | Genome-fragment | NA   | 5.16  | 0     |
| S17_v3_k141_42848  full   | 2748  | No  | NA   | 0  | 1              | Low-quality     | Genome-fragment | NA   | 5.12  | 0     |
| S16_v3_40337  full        | 2750  | No  | NA   | 0  | 1              | Not-determined  | Genome-fragment | NA   | 6.71  | 0     |
| S16_v3_40144  full        | 1678  | No  | NA   | 0  | 2              | Not-determined  | Genome-fragment | NA   | 6.71  | 0     |
| S14_v3_k141_36192  full   | 2748  | No  | NA   | 0  | 0              | Low-quality     | Genome-fragment | NA   | 6.77  | 0     |
| S7_v3_36109  full         | 2748  | No  | NA   | 1  | 1              | Low-quality     | Genome-fragment | NA   | 3.22  | 0     |
| S16_v3_40398  full        | 1779  | No  | NA   | 0  | 2              | Not-determined  | Genome-fragment | NA   | 6.71  | 0     |
| S16_v3_40469  full        | 2450  | No  | NA   | 0  | 2              | Not-determined  | Genome-fragment | NA   | 6.71  | 0     |
| S11_v3_k141_72719  full   | 2749  | No  | NA   | 0  | 1              | Low-quality     | Genome-fragment | NA   | 3.85  | 0     |
| S11_v3_k141_55112  full   | 2749  | No  | NA   | 0  | 2              | Low-quality     | Genome-fragment | NA   | 6.71  | 0     |
| S16_v3_40791  full        | 1184  | No  | NA   | 0  | 0              | Not-determined  | Genome-fragment | NA   | 6.71  | 0     |
| S16_v3_47440  full        | 2750  | No  | NA   | 0  | 0              | Low-quality     | Genome-fragment | NA   | 5.76  | 0     |
| S8_extracted_k141_66488   | 2750  | No  | NA   | 0  | 0              | Low-quality     | Genome-fragment | NA   | 5.04  | 0     |
| S16_v3_41158  full        | 1745  | No  | NA   | 0  | 1              | Not-determined  | Genome-fragment | NA   | 6.71  | 0     |
| S8_v3_k141_121492  full   | 2750  | No  | NA   | 0  | 0              | Low-quality     | Genome-fragment | NA   | 4.34  | 0     |
| S16_v3_41166  full        | 1025  | No  | NA   | 0  | 0              | Not-determined  | Genome-fragment | NA   | 6.71  | 0     |
| S16_v3_41175  full        | 1796  | No  | NA   | 0  | 2              | Not-determined  | Genome-fragment | NA   | 6.71  | 0     |
| S16_v3_41181  full        | 1874  | No  | NA   | 0  | 2              | Not-determined  | Genome-fragment | NA   | 6.71  | 0     |
| S16_v3_41199  full        | 1688  | No  | NA   | 0  | 2              | Not-determined  | Genome-fragment | NA   | 7.37  | 0     |
| S14_v3_k141_82079  full   | 2751  | No  | NA   | 0  | 0              | Low-quality     | Genome-fragment | NA   | 1.16  | 0     |
| S14_v3_k141_62034  full   | 2751  | No  | NA   | 0  | 3              | Low-quality     | Genome-fragment | NA   | 6.71  | 0     |
| S16_v3_41428  full        | 2871  | No  | NA   | 0  | 1              | Not-determined  | Genome-fragment | NA   | 6.71  | 0     |
| S16_v3_41437  full        | 7865  | No  | NA   | 0  | 2              | Not-determined  | Genome-fragment | NA   | 6.71  | 0     |
| S7_v3_124818  full        | 2751  | No  | NA   | 3  | 0              | Low-quality     | Genome-fragment | NA   | 7.67  | 0     |
| S10_v3_17661  full        | 2751  | No  | NA   | 1  | 0              | Low-quality     | Genome-fragment | NA   | 6.41  | 0     |
| S15_extracted_28695       | 2751  | No  | NA   | 0  | 0              | Low-quality     | Genome-fragment | NA   | 4.92  | 0     |
| S16_v3_41810  full        | 2549  | No  | NA   | 0  | 0              | Not-determined  | Genome-fragment | NA   | 6.71  | 0     |
| S16_v3_42081  full        | 3245  | No  | NA   | 0  | 2              | Not-determined  | Genome-fragment | NA   | 6.71  | 0     |
| S16_v3_42102  full        | 1514  | No  | NA   | 0  | 0              | Not-determined  | Genome-fragment | NA   | 6.71  | 0     |
| S9_v3_k141_13332  full    | 2752  | No  | NA   | 0  | 2              | Low-quality     | Genome-fragment | NA   | 0.91  | 0     |
| S16_v3_42206  full        | 1158  | No  | NA   | 0  | 0              | Not-determined  | Genome-fragment | NA   | 6.71  | 0     |
| S7_v3_64529  full         | 2752  | No  | NA   | 0  | 0              | Low-quality     | Genome-fragment | NA   | 6.32  | 0     |
| S16_v3_42228  full        | 1781  | No  | NA   | 0  | 1              | Not-determined  | Genome-fragment | NA   | 6.71  | 0     |
| S16_v3_42250  full        | 2961  | No  | NA   | 0  | 1              | Not-determined  | Genome-fragment | NA   | 6.71  | 0     |
| S7_v3_103674  full        | 2752  | No  | NA   | 0  | 0              | Low-quality     | Genome-fragment | NA   | 6.53  | 0     |
| S13_v3_37851  full        | 2753  | No  | NA   | 0  | 0              | Low-quality     | Genome-fragment | NA   | 7     | 0     |
| S8_v3_k141_101183  full   | 2753  | No  | NA   | 0  | 0              | Low-quality     | Genome-fragment | NA   | 4.89  | 0     |
| S5_v3_k141_131374  full   | 2754  | No  | NA   | 0  | 0              | Low-quality     | Genome-fragment | NA   | 6.63  | 0     |
| S16_v3_42677  full        | 5925  | No  | NA   | 0  | 3              | Not-determined  | Genome-fragment | NA   | 6.71  | 0     |
| S16_v3_42695  full        | 1274  | No  | NA   | 0  | 1              | Not-determined  | Genome-fragment | NA   | 6.71  | 0     |
| S16_v3_42769  full        | 3819  | No  | NA   | 0  | 3              | Not-determined  | Genome-fragment | NA   | 3.43  | 0     |
| S16_v3_42781  full        | 2754  | No  | NA   | 0  | 0              | Low-quality     | Genome-fragment | NA   | 6.71  | 0     |
| S16_v3_42960  full        | 1500  | No  | NA   | 0  | 2              | Not-determined  | Genome-fragment | NA   | 6.71  | 0     |
| S11_v3_k141_78975  full   | 2756  | No  | NA   | 2  | 0              | Low-quality     | Genome-fragment | NA   | 5.91  | 0     |
| S16_v3_43053  full        | 2144  | No  | NA   | 0  | 1              | Not-determined  | Genome-fragment | NA   | 2.01  | 0     |
| S7_v3_64603  full         | 2757  | No  | NA   | 0  | 0              | Low-quality     | Genome-fragment | NA   | 6.71  | 0     |
| S16_v3_43241  full        | 1729  | No  | NA   | 0  | 1              | Not-determined  | Genome-fragment | NA   | 6.71  | 0     |
| S10_extracted_15314       | 2757  | No  | NA   | 0  | 0              | Low-quality     | Genome-fragment | NA   | 9.56  | 0     |
| S16_v3_43305  full        | 3765  | No  | NA   | 0  | 0              | Not-determined  | Genome-fragment | NA   | 6.71  | 0     |
| S9_v3_k141_14381  lt2gme  | 2758  | No  | NA   | 2  | 0              | Low-quality     | Genome-fragment | NA   | 9.05  | 0     |
| S16_v3_43472  full        | 2765  | No  | NA   | 0  | 3              | Not-determined  | Genome-fragment | NA   | 6.71  | 0     |
| S16_v3_43599  full        | 1526  | No  | NA   | 0  | 2              | Not-determined  | Genome-fragment | NA   | 6.71  | 0     |
| S16_v3_43638  full        | 1758  | No  | NA   | 0  | 0              | Not-determined  | Genome-fragment | NA   | 6.71  | 0     |
| S16_v3_43651  full        | 4623  | No  | NA   | 0  | 2              | Not-determined  | Genome-fragment | NA   | 6.71  | 0     |
| S16_v3_43673  full        | 2746  | No  | NA   | 0  | 1              | Not-determined  | Genome-fragment | NA   | 6.71  | 0     |
| S16_v3_43686  full        | 1006  | No  | NA   | 0  | 0              | Not-determined  | Genome-fragment | NA   | 6.71  | 0     |
| S16_v3_43728  full        | 2847  | No  | NA   | 0  | 0              | Not-determined  | Genome-fragment | NA   | 6.71  | 0     |
| S6_v3_k141_35972  full    | 2758  | No  | NA   | 0  | 2              | Low-quality     | Genome-fragment | NA   | 4.2   | 0     |
| S3_v3_k141_101834  full   | 2759  | No  | NA   | 0  | 0              | Low-quality     | Genome-fragment | NA   | 6.31  | 0     |
| S16_v3_43925  full        | 7419  | No  | NA   | 0  | 2              | Not-determined  | Genome-fragment | NA   | 6.71  | 0     |
| S10_v3_3974  full         | 2759  | No  | NA   | 0  | 0              | Low-quality     | Genome-fragment | NA   | 3.15  | 0     |
| S16_v3_44064  full        | 2013  | No  | NA   | 0  | 2              | Not-determined  | Genome-fragment | NA   | 2.94  | 0     |
| S17_v3_k141_7720  full    | 2760  | No  | NA   | 1  | 0              | Low-quality     | Genome-fragment | NA   | 5.49  | 0     |
| S11_v3_k141_85799  full   | 2760  | No  | NA   | 2  | 0              | Low-quality     | Genome-fragment | NA   | 3.28  | 0     |
| S14_v3_k141_41522  full   | 2760  | No  | NA</ |    |                |                 |                 |      |       |       |



|                          |          |       |    |    |    |                |                 |                 |    |       |
|--------------------------|----------|-------|----|----|----|----------------|-----------------|-----------------|----|-------|
| S16_vs_47053             | [full]   | 3447  | No | NA | 0  | 0              | Not-determined  | Genome-fragment | NA | 0     |
| S16_vs_47117             | [full]   | 1748  | No | NA | 0  | 0              | Not-determined  | Genome-fragment | NA | 0     |
| S16_vs_47250             | [full]   | 1851  | No | NA | 0  | 1              | Not-determined  | Genome-fragment | NA | 0     |
| S16_vs_47287             | [full]   | 1392  | No | NA | 0  | 2              | Not-determined  | Genome-fragment | NA | 0     |
| S16_vs_47332             | [full]   | 3458  | No | NA | 0  | 3              | Not-determined  | Genome-fragment | NA | 0     |
| S15_extracted_22393      | [full]   | 2770  | No | NA | 2  | 0              | Low-quality     | Genome-fragment | NA | 4.51  |
| S16_vs_47549             | [full]   | 6955  | No | NA | 0  | 5              | Not-determined  | Genome-fragment | NA | 0     |
| S16_vs_47622             | [full]   | 2701  | No | NA | 0  | 1              | Not-determined  | Genome-fragment | NA | 0     |
| S17_vs_k141_155445       | [full]   | 2771  | No | NA | 0  | 0              | Not-determined  | Genome-fragment | NA | 6.1   |
| S16_extracted_167537     | [full]   | 2771  | No | NA | 2  | 0              | Low-quality     | Genome-fragment | NA | 5.06  |
| S16_vs_47712             | [full]   | 1586  | No | NA | 0  | 2              | Not-determined  | Genome-fragment | NA | 0     |
| S1_extracted_k141_85965  | [full]   | 2772  | No | NA | 5  | 0              | Low-quality     | Genome-fragment | NA | 6.41  |
| S1_vs_k141_16965         | [full]   | 2772  | No | NA | 0  | 0              | Low-quality     | Genome-fragment | NA | 5.66  |
| S16_vs_47795             | [full]   | 2963  | No | NA | 0  | 2              | Not-determined  | Genome-fragment | NA | 0     |
| S6_vs_k141_13938         | [H2gene] | 2772  | No | NA | 0  | 0              | Low-quality     | Genome-fragment | NA | 3.42  |
| S16_vs_47856             | [full]   | 1155  | No | NA | 0  | 1              | Not-determined  | Genome-fragment | NA | 0     |
| S11_vs_k141_65858        | [full]   | 2773  | No | NA | 3  | 0              | Low-quality     | Genome-fragment | NA | 3.93  |
| S16_vs_48070             | [full]   | 3503  | No | NA | 0  | 4              | Not-determined  | Genome-fragment | NA | 0     |
| S16_vs_48075             | [full]   | 4450  | No | NA | 0  | 3              | Not-determined  | Genome-fragment | NA | 0     |
| S7_vs_16863              | [full]   | 2773  | No | NA | 1  | 0              | Low-quality     | Genome-fragment | NA | 7.35  |
| S16_vs_48169             | [full]   | 5202  | No | NA | 0  | 0              | Not-determined  | Genome-fragment | NA | 0     |
| S8_vs_k141_70063         | [full]   | 2773  | No | NA | 0  | 2              | Low-quality     | Genome-fragment | NA | 0.75  |
| S13_extracted_90346      | [full]   | 2774  | No | NA | 4  | 0              | Low-quality     | Genome-fragment | NA | 4.56  |
| S16_vs_48425             | [full]   | 7147  | No | NA | 0  | 2              | Not-determined  | Genome-fragment | NA | 0     |
| S16_vs_34259             | [full]   | 2774  | No | NA | 0  | 0              | Low-quality     | Genome-fragment | NA | 5.91  |
| S16_vs_48530             | [full]   | 2673  | No | NA | 0  | 1              | Not-determined  | Genome-fragment | NA | 0     |
| S16_vs_48559             | [full]   | 2958  | No | NA | 0  | 1              | Not-determined  | Genome-fragment | NA | 0     |
| S16_vs_112562            | [full]   | 2774  | No | NA | 0  | 0              | Low-quality     | Genome-fragment | NA | 1.84  |
| S12_vs_k141_71090        | [full]   | 2774  | No | NA | 0  | 1              | Low-quality     | Genome-fragment | NA | 1.27  |
| S17_vs_k141_140415       | [full]   | 2775  | No | NA | 0  | 1              | Low-quality     | Genome-fragment | NA | 7.61  |
| S16_vs_48637             | [full]   | 1349  | No | NA | 0  | 2              | Not-determined  | Genome-fragment | NA | 0     |
| S16_extracted_31326      | [full]   | 2775  | No | NA | 0  | 0              | Low-quality     | Genome-fragment | NA | 2.88  |
| S16_vs_48714             | [full]   | 2424  | No | NA | 0  | 5              | Medium-quality  | Genome-fragment | NA | 62.31 |
| S2_vs_k141_5858          | [full]   | 2775  | No | NA | 4  | 0              | Low-quality     | Genome-fragment | NA | 4.6   |
| S8_extracted_k141_148861 | [full]   | 2775  | No | NA | 1  | 0              | Low-quality     | Genome-fragment | NA | 8.6   |
| S16_vs_49139             | [full]   | 1314  | No | NA | 0  | 1              | Not-determined  | Genome-fragment | NA | 0     |
| S16_vs_49142             | [full]   | 11726 | No | NA | 0  | 9              | Not-determined  | Genome-fragment | NA | 0     |
| S1_vs_k141_120654        | [full]   | 2776  | No | NA | 1  | 0              | Low-quality     | Genome-fragment | NA | 3.93  |
| S1_vs_k141_143634        | [full]   | 2776  | No | NA | 0  | 0              | Low-quality     | Genome-fragment | NA | 6.48  |
| S16_vs_49349             | [full]   | 2404  | No | NA | 0  | 2              | Not-determined  | Genome-fragment | NA | 0     |
| S1_vs_k141_151567        | [full]   | 2776  | No | NA | 2  | 0              | Low-quality     | Genome-fragment | NA | 7.93  |
| S16_vs_49395             | [full]   | 2530  | No | NA | 2  | Not-determined | Genome-fragment | NA              | 0  |       |
| S8_vs_k141_58181         | [full]   | 2776  | No | NA | 0  | 1              | Low-quality     | Genome-fragment | NA | 5.61  |
| S12_vs_k141_95488        | [full]   | 2778  | No | NA | 0  | 1              | Low-quality     | Genome-fragment | NA | 2.41  |
| S11_extracted_k141_71769 | [full]   | 2779  | No | NA | 0  | 0              | Low-quality     | Genome-fragment | NA | 6.36  |
| S16_vs_49846             | [full]   | 9531  | No | NA | 0  | 2              | Not-determined  | Genome-fragment | NA | 0     |
| S16_vs_49862             | [full]   | 3208  | No | NA | 0  | 1              | Not-determined  | Genome-fragment | NA | 0     |
| S7_vs_130060             | [full]   | 2779  | No | NA | 0  | 2              | Low-quality     | Genome-fragment | NA | 2.27  |
| S17_vs_k141_148712       | [full]   | 2780  | No | NA | 0  | 2              | Low-quality     | Genome-fragment | NA | 1.43  |
| S11_vs_k141_47609        | [full]   | 2780  | No | NA | 2  | 0              | Low-quality     | Genome-fragment | NA | 2.78  |
| S16_vs_50063             | [full]   | 1815  | No | NA | 0  | 2              | Not-determined  | Genome-fragment | NA | 0     |
| S12_vs_113324            | [full]   | 2780  | No | NA | 1  | 0              | Low-quality     | Genome-fragment | NA | 1.91  |
| S7_vs_84898              | [full]   | 2780  | No | NA | 3  | 0              | Low-quality     | Genome-fragment | NA | 6.81  |
| S8_vs_k141_140518        | [full]   | 2780  | No | NA | 0  | 2              | Low-quality     | Genome-fragment | NA | 0.86  |
| S17_vs_k141_92785        | [full]   | 2781  | No | NA | 0  | 3              | Low-quality     | Genome-fragment | NA | 1.64  |
| S16_vs_50358             | [full]   | 5068  | No | NA | 0  | 2              | Not-determined  | Genome-fragment | NA | 0     |
| S16_vs_50368             | [full]   | 3453  | No | NA | 0  | 2              | Not-determined  | Genome-fragment | NA | 0     |
| S16_vs_50372             | [full]   | 1607  | No | NA | 0  | 2              | Not-determined  | Genome-fragment | NA | 0     |
| S11_vs_k141_38554        | [full]   | 2781  | No | NA | 0  | 1              | Low-quality     | Genome-fragment | NA | 4.64  |
| S16_vs_50434             | [full]   | 3192  | No | NA | 0  | 2              | Not-determined  | Genome-fragment | NA | 0     |
| S16_vs_50569             | [full]   | 3208  | No | NA | 0  | 3              | Not-determined  | Genome-fragment | NA | 0     |
| S14_extracted_k141_67830 | [full]   | 2781  | No | NA | 0  | 0              | Low-quality     | Genome-fragment | NA | 9.11  |
| S16_vs_50594             | [full]   | 4685  | No | NA | 0  | 3              | Not-determined  | Genome-fragment | NA | 0     |
| S16_vs_50666             | [full]   | 8928  | No | NA | 0  | 6              | Not-determined  | Genome-fragment | NA | 0     |
| S16_vs_50739             | [full]   | 6575  | No | NA | 0  | 0              | Not-determined  | Genome-fragment | NA | 0     |
| S16_vs_50748             | [full]   | 1818  | No | NA | 0  | 0              | Not-determined  | Genome-fragment | NA | 0     |
| S14_vs_k141_16511        | [full]   | 2781  | No | NA | 2  | 0              | Low-quality     | Genome-fragment | NA | 6.66  |
| S16_vs_51005             | [full]   | 1736  | No | NA | 0  | 0              | Not-determined  | Genome-fragment | NA | 0     |
| S16_vs_51025             | [full]   | 7053  | No | NA | 2  | Not-determined | Genome-fragment | NA              | 0  |       |
| S16_vs_51264             | [full]   | 4919  | No | NA | 0  | 3              | Not-determined  | Genome-fragment | NA | 0     |
| S3_vs_k141_126546        | [full]   | 2781  | No | NA | 1  | 0              | Low-quality     | Genome-fragment | NA | 4.86  |
| S15_vs_51677             | [full]   | 2781  | No | NA | 0  | 0              | Low-quality     | Genome-fragment | NA | 6.56  |
| S16_vs_51474             | [full]   | 3598  | No | NA | 0  | 3              | Not-determined  | Genome-fragment | NA | 0     |
| S6_vs_k141_11813         | [full]   | 2781  | No | NA | 1  | 0              | Low-quality     | Genome-fragment | NA | 44.84 |
| S16_vs_51512             | [full]   | 4306  | No | NA | 0  | 2              | Not-determined  | Genome-fragment | NA | 0     |
| S8_extracted_k141_135685 | [full]   | 2781  | No | NA | 1  | 0              | Low-quality     | Genome-fragment | NA | 4.65  |
| S12_vs_k141_130138       | [full]   | 2782  | No | NA | 1  | 0              | Low-quality     | Genome-fragment | NA | 6.33  |
| S16_vs_51713             | [full]   | 1057  | No | NA | 0  | 2              | Not-determined  | Genome-fragment | NA | 0     |
| S16_vs_51727             | [full]   | 2107  | No | NA | 0  | 4              | Not-determined  | Genome-fragment | NA | 0     |
| S16_vs_51771             | [full]   | 2031  | No | NA | 0  | 1              | Not-determined  | Genome-fragment | NA | 0     |
| S5_vs_k141_2422          | [full]   | 2783  | No | NA | 0  | 2              | Low-quality     | Genome-fragment | NA | 0.91  |
| S16_vs_51901             | [full]   | 37473 | No | NA | 7  | 0              | High-quality    | Genome-fragment | NA | 100   |
| S5_vs_k141_88018         | [full]   | 2783  | No | NA | 0  | 0              | Low-quality     | Genome-fragment | NA | 5.38  |
| S16_vs_52012             | [full]   | 2001  | No | NA | 0  | 1              | Not-determined  | Genome-fragment | NA | 0     |
| S9_extracted_k141_81798  | [full]   | 2784  | No | NA | 0  | 0              | Low-quality     | Genome-fragment | NA | 6.32  |
| S16_vs_52045             | [full]   | 2774  | No | NA | 0  | 0              | Not-determined  | Genome-fragment | NA | 0     |
| S16_vs_52090             | [full]   | 1905  | No | NA | 0  | 0              | Not-determined  | Genome-fragment | NA | 0     |
| S16_vs_52177             | [full]   | 1461  | No | NA | 0  | 0              | Not-determined  | Genome-fragment | NA | 0     |
| S11_extracted_k141_36302 | [full]   | 2784  | No | NA | 0  | 0              | Low-quality     | Genome-fragment | NA | 5.54  |
| S16_vs_52209             | [full]   | 7250  | No | NA | 0  | 6              | Not-determined  | Genome-fragment | NA | 0     |
| S16_vs_52214             | [full]   | 2170  | No | NA | 0  | 2              | Not-determined  | Genome-fragment | NA | 0     |
| S16_vs_52237             | [full]   | 2452  | No | NA | 0  | 3              | Not-determined  | Genome-fragment | NA | 0     |
| S16_vs_52278             | [full]   | 1581  | No | NA | 0  | 2              | Not-determined  | Genome-fragment | NA | 0     |
| S11_extracted_k141_51864 | [full]   | 2784  | No | NA | 2  | 0              | Low-quality     | Genome-fragment | NA | 1.06  |
| S16_vs_52457             | [full]   | 2362  | No | NA | 0  | 1              | Not-determined  | Genome-fragment | NA | 0     |
| S16_vs_52479             | [full]   | 2333  | No | NA | 0  | 0              | Not-determined  | Genome-fragment | NA | 0     |
| S16_vs_52567             | [full]   | 3270  | No | NA | 0  | 1              | Not-determined  | Genome-fragment | NA | 0     |
| S16_vs_52604             | [full]   | 1521  | No | NA | 0  | 0              | Not-determined  | Genome-fragment | NA | 0     |
| S14_vs_k141_103026       | [full]   | 2784  | No | NA | 0  | 0              | Low-quality     | Genome-fragment | NA | 6.8   |
| S14_vs_k141_78370        | [full]   | 2785  | No | NA | 0  | 0              | Low-quality     | Genome-fragment | NA | 0.88  |
| S14_vs_k141_21588        | [full]   | 2785  | No | NA | 0  | 0              | Low-quality     | Genome-fragment | NA | 2.2   |
| S7_vs_65640              | [full]   | 2785  | No | NA | 0  | 0              | Low-quality     | Genome-fragment | NA | 6.9   |
| S16_vs_52865             | [full]   | 2358  | No | NA | 0  | 2              | Not-determined  | Genome-fragment | NA | 0     |
| S16_vs_52914             | [full]   | 1563  | No | NA | 0  | 0              | Not-determined  | Genome-fragment | NA | 0     |
| S16_vs_52917             | [full]   | 2962  | No | NA | 0  | 0              | Not-determined  | Genome-fragment | NA | 0     |
| S10_vs_43707             | [full]   | 2785  | No | NA | 0  | 3              | Low-quality     | Genome-fragment | NA | 4.61  |
| S16_vs_52980             | [full]   | 1855  | No | NA | 0  | 0              | Not-determined  | Genome-fragment | NA | 0     |
| S11_vs_k141_81870        | [full]   | 2786  | No | NA | 0  | 0              | Low-quality     | Genome-fragment | NA | 4.9   |
| S16_vs_53061             | [full]   | 1309  | No | NA | 0  | 1              | Not-determined  | Genome-fragment | NA | 0     |
| S16_vs_53109             | [full]   | 3245  | No | NA | 0  | 0              | Not-determined  | Genome-fragment | NA | 0     |
| S16_vs_53174             | [full]   | 1035  | No | NA | 0  | 0              | Not-determined  | Genome-fragment | NA | 7.66  |
| S7_extracted_123515      | [full]   | 2786  | No | NA | 0  | 0              | Low-quality     | Genome-fragment | NA | 1.27  |
| S7_vs_98637              | [full]   | 2786  | No | NA | 0  | 3              | Low-quality     | Genome-fragment | NA | 0     |
| S16_vs_53210             | [full]   | 3644  | No | NA | 0  | 1              | Not-determined  | Genome-fragment | NA | 1.24  |
| S16_vs_140885            | [full]   | 2786  | No | NA | 0  | 1              | Low-quality     | Genome-fragment | NA | 80.94 |
| S12_vs_k141_110978       | [full]   | 2786  | No | NA | 0  | 2              | Low-quality     | Genome-fragment | NA | 1.35  |
| S16_vs_53300             | [full]   | 1781  | No | NA | 0  | 1              | Not-determined  | Genome-fragment | NA | 0     |
| S1_extracted_k141_124692 | [full]   | 2787  | No | NA | 0  | 0              | Low-quality     | Genome-fragment | NA | 7.12  |
| S16_vs_53400             | [full]   | 1274  | No | NA | 0  | 0              | Not-determined  | Genome-fragment | NA | 0     |
| S16_vs_53452             | [full]   | 3229  | No | NA | 0  | 0              | Not-determined  | Genome-fragment | NA | 0     |
| S16_vs_53483             | [full]   | 5552  | No | NA | 0  | 4              | Not-determined  | Genome-fragment | NA | 0     |
| S8_vs_k141_11098         | [full]   | 2787  | No | NA | 0  | 1              | Low-quality     | Genome-fragment | NA | 6.25  |
| S8_vs_53623              | [full]   | 4706  | No | NA | 0  | 2              | Not-determined  | Genome-fragment | NA | 0     |
| S16_vs_k141_13523        | [full]   | 2787  | No | NA | 0  | 2              | Low-quality     | Genome-fragment | NA | 2.36  |
| S16_vs_53927             | [full]   | 4965  | No | NA | 0  | 4              | Not-determined  | Genome-fragment | NA | 0     |
| S16_vs_53938             | [full]   | 1139  | No | NA | 0  | 0              | Not-determined  | Genome-fragment | NA | 0     |
| S11_vs_k141_26400        | [full]   | 2788  | No | NA | 0  | 0              | Low-quality     | Genome-fragment | NA | 3     |
| S10_extracted_2820       | [full]   | 2788  | No | NA | 0  | 2              | Low-quality     | Genome-fragment | NA | 8.08  |
| S17_vs_k141_19837        | [full]   | 2789  | No | NA | 0  | 1              | Low-quality     | Genome-fragment | NA | 7.47  |
| S9_extracted_k141_4655   | [full]   | 2790  | No | NA | 6  | 0              | Low-quality     | Genome-fragment | NA | 9.11  |
| S16_vs_54250             | [full]   | 23594 | No | NA | 17 | 0              | Medium-quality  | Genome-fragment | NA | 62.46 |
| S9_vs_k141_76314         | [full]   | 2790  | No | NA | 0  | 0              | Low-quality     | Genome-fragment | NA | 7.37  |
| S16_vs_54378             | [full]   | 1628  | No | NA | 0  | 1              | Not-determined  | Genome-fragment | NA | 0     |
| S13_vs_31514             | [full]   | 2790  | No | NA | 2  | 0              | Low-quality     | Genome-fragment | NA | 4.92  |
| S8_vs_k141_189430        | [full]   | 2790  | No | NA | 0  | 0              | Low-quality     | Genome-fragment | NA | 5.12  |
| S3_vs_k141_58143         | [full]   | 2791  | No | NA | 0  | 0              | Low-quality     | Genome-fragment | NA | 3.36  |
| S16_vs_54482             | [full]   | 4098  | No | NA | 0  | 1              | Not-determined  | Genome-fragment | NA | 0     |
| S7_vs_41287              | [full]   | 2791  | No | NA | 1  | 0              | Low-quality     | Genome-fragment | NA | 7.45  |
| S16_vs_54616             | [full]   | 17792 | No | NA | 17 | 0              | Medium-quality  | Genome-fragment | NA | 52.97 |
| S16_vs_54669             | [full]   | 2749  | No | NA | 0  | 4              | Not-determined  | Genome-fragment | NA | 0     |



|                           |           |       |     |      |   |   |                |                 |      |       |
|---------------------------|-----------|-------|-----|------|---|---|----------------|-----------------|------|-------|
| 58_vs_k141_740211         | [full]    | 2797  | No  | NA   | 1 | 0 | Low-quality    | Genome-fragment | 1.61 | 0     |
| S14_vs_k141_401941        | [full]    | 2798  | No  | NA   | 2 | 0 | Low-quality    | Genome-fragment | 6.47 | 0     |
| S16_vs_56719              | [full]    | 8478  | No  | NA   | 0 | 2 | Not-determined | Genome-fragment | NA   | 0     |
| S16_vs_56738              | [full]    | 2025  | No  | NA   | 0 | 3 | Not-determined | Genome-fragment | NA   | 0     |
| S16_vs_56808              | [full]    | 1693  | No  | NA   | 0 | 2 | Not-determined | Genome-fragment | NA   | 0     |
| S6_vs_k141_110077         | [full]    | 2798  | No  | NA   | 0 | 0 | Low-quality    | Genome-fragment | 5.93 | 0     |
| S16_vs_56858              | [full]    | 2489  | No  | NA   | 0 | 0 | Not-determined | Genome-fragment | NA   | 0     |
| S17_vs_k141_100836        | [full]    | 2799  | No  | NA   | 0 | 1 | Low-quality    | Genome-fragment | 4.69 | 0     |
| S16_vs_56899              | [full]    | 2116  | No  | NA   | 2 | 2 | Not-determined | Genome-fragment | NA   | 0     |
| S14_vs_k141_79686         | [full]    | 2799  | No  | NA   | 3 | 0 | Low-quality    | Genome-fragment | 6.83 | 0     |
| S16_vs_56940              | [full]    | 2091  | No  | NA   | 0 | 0 | Not-determined | Genome-fragment | NA   | 0     |
| S16_vs_56963              | [full]    | 2763  | No  | NA   | 3 | 2 | Not-determined | Genome-fragment | NA   | 0     |
| S5_vs_k141_120052         | [full]    | 2799  | No  | NA   | 1 | 0 | Low-quality    | Genome-fragment | 1.81 | 0     |
| S10_vs_8532               | [full]    | 2799  | No  | NA   | 0 | 0 | Low-quality    | Genome-fragment | 4.6  | 0     |
| S2_vs_k141_3426           | [full]    | 2799  | No  | NA   | 3 | 0 | Low-quality    | Genome-fragment | 9.21 | 0     |
| S16_vs_57069              | [full]    | 3862  | No  | NA   | 3 | 2 | Not-determined | Genome-fragment | NA   | 0     |
| S16_vs_57672              | [full]    | 1572  | No  | NA   | 0 | 0 | Not-determined | Genome-fragment | NA   | 0     |
| S16_vs_57735              | [full]    | 1290  | No  | NA   | 0 | 2 | Not-determined | Genome-fragment | NA   | 0     |
| S8_vs_k141_128244         | [full]    | 2799  | No  | NA   | 3 | 0 | Low-quality    | Genome-fragment | 8.12 | 0     |
| S16_vs_57838              | [full]    | 2439  | No  | NA   | 0 | 1 | Not-determined | Genome-fragment | NA   | 0     |
| S16_vs_57874              | [full]    | 3820  | No  | NA   | 0 | 3 | Not-determined | Genome-fragment | NA   | 0     |
| S16_vs_57923              | [full]    | 2476  | No  | NA   | 0 | 1 | Not-determined | Genome-fragment | NA   | 0     |
| S16_vs_57984              | [full]    | 2920  | No  | NA   | 0 | 0 | Not-determined | Genome-fragment | NA   | 0     |
| S17_vs_k141_90625         | [full]    | 2800  | No  | NA   | 0 | 0 | Low-quality    | Genome-fragment | 0.48 | 0     |
| S16_vs_58144              | [full]    | 2117  | No  | NA   | 0 | 2 | Not-determined | Genome-fragment | NA   | 0     |
| S16_vs_58186              | [full]    | 1245  | No  | NA   | 0 | 0 | Not-determined | Genome-fragment | NA   | 0     |
| S16_vs_58327              | [full]    | 1907  | No  | NA   | 0 | 3 | Not-determined | Genome-fragment | NA   | 0     |
| S17_vs_k141_110041        | [full]    | 2800  | No  | NA   | 0 | 1 | Low-quality    | Genome-fragment | 3.27 | 0     |
| S16_vs_58359              | [full]    | 1116  | No  | NA   | 0 | 0 | Not-determined | Genome-fragment | NA   | 0     |
| S16_vs_58402              | [full]    | 1468  | No  | NA   | 0 | 2 | Not-determined | Genome-fragment | NA   | 0     |
| S16_vs_58403              | [full]    | 7123  | No  | NA   | 0 | 7 | Not-determined | Genome-fragment | NA   | 0     |
| S14_vs_k141_15590         | [full]    | 2800  | No  | NA   | 0 | 0 | Low-quality    | Genome-fragment | 4.17 | 0     |
| S16_vs_58507              | [full]    | 1271  | No  | NA   | 0 | 0 | Not-determined | Genome-fragment | NA   | 0     |
| S14_vs_k141_84784         | [full]    | 2800  | No  | NA   | 1 | 0 | Low-quality    | Genome-fragment | 1.22 | 0     |
| S16_vs_58549              | [full]    | 1860  | No  | NA   | 0 | 2 | Not-determined | Genome-fragment | NA   | 0     |
| S16_vs_58621              | [full]    | 2654  | No  | NA   | 0 | 1 | Not-determined | Genome-fragment | NA   | 0     |
| S3_extracted_k141_69683   |           | 2800  | No  | NA   | 0 | 0 | Low-quality    | Genome-fragment | 1.59 | 0     |
| S7_vs_84746               | [full]    | 2800  | No  | NA   | 1 | 0 | Low-quality    | Genome-fragment | 7.27 | 0     |
| S16_vs_58876              | [full]    | 7811  | No  | NA   | 6 | 2 | Not-determined | Genome-fragment | NA   | 0     |
| S16_vs_59131              | [full]    | 2800  | No  | NA   | 0 | 0 | Low-quality    | Genome-fragment | 3.38 | 0     |
| S10_extracted_121009      |           | 2800  | No  | NA   | 0 | 0 | Low-quality    | Genome-fragment | 2.72 | 0     |
| S10_vs_15591              | [itZgene] | 2800  | No  | NA   | 0 | 0 | Low-quality    | Genome-fragment | 6.41 | 0     |
| S16_vs_59076              | [full]    | 1336  | No  | NA   | 0 | 1 | Not-determined | Genome-fragment | NA   | 0     |
| S16_vs_59151              | [full]    | 1069  | No  | NA   | 0 | 0 | Not-determined | Genome-fragment | NA   | 0     |
| S16_vs_59235              | [full]    | 2111  | No  | NA   | 0 | 2 | Not-determined | Genome-fragment | NA   | 0     |
| S16_vs_59259              | [full]    | 1411  | No  | NA   | 0 | 0 | Not-determined | Genome-fragment | NA   | 0     |
| S16_vs_59306              | [full]    | 1845  | No  | NA   | 0 | 1 | Not-determined | Genome-fragment | NA   | 0     |
| S16_vs_59340              | [full]    | 1261  | No  | NA   | 0 | 1 | Not-determined | Genome-fragment | NA   | 0     |
| S16_vs_59360              | [full]    | 2283  | No  | NA   | 1 | 1 | Not-determined | Genome-fragment | NA   | 0     |
| S8_vs_k141_122387         | [full]    | 2800  | No  | NA   | 0 | 0 | Low-quality    | Genome-fragment | 6.11 | 0     |
| S17_vs_k141_42708         | [full]    | 2801  | No  | NA   | 0 | 2 | Low-quality    | Genome-fragment | 7.31 | 0     |
| S16_vs_59593              | [full]    | 2096  | No  | NA   | 1 | 1 | Not-determined | Genome-fragment | NA   | 0     |
| S11_extracted_k141_55934  |           | 2801  | No  | NA   | 1 | 0 | Low-quality    | Genome-fragment | 3.98 | 0     |
| S16_vs_59687              | [full]    | 1125  | No  | NA   | 0 | 0 | Not-determined | Genome-fragment | NA   | 0     |
| S14_vs_k141_100556        | [full]    | 2801  | No  | NA   | 0 | 0 | Low-quality    | Genome-fragment | 3.93 | 0     |
| S16_vs_59787              | [full]    | 13249 | No  | NA   | 0 | 0 | Not-determined | Genome-fragment | NA   | 0     |
| S16_vs_59856              | [full]    | 6749  | No  | NA   | 0 | 5 | Not-determined | Genome-fragment | NA   | 0     |
| S1_vs_k141_61460          | [full]    | 2801  | No  | NA   | 0 | 0 | Low-quality    | Genome-fragment | 8.42 | 0     |
| S3_vs_k141_12572          | [full]    | 2801  | No  | NA   | 0 | 0 | Low-quality    | Genome-fragment | 7.17 | 0     |
| S10_vs_67611              | [full]    | 2801  | No  | NA   | 2 | 0 | Low-quality    | Genome-fragment | 4.44 | 0     |
| S16_vs_59946              | [full]    | 3681  | No  | NA   | 0 | 0 | Not-determined | Genome-fragment | NA   | 0     |
| S16_vs_60019              | [full]    | 4123  | No  | NA   | 0 | 0 | Not-determined | Genome-fragment | NA   | 0     |
| S16_vs_60039              | [full]    | 5252  | No  | NA   | 0 | 3 | Not-determined | Genome-fragment | NA   | 0     |
| S10_vs_111340             | [full]    | 2801  | No  | NA   | 0 | 1 | Low-quality    | Genome-fragment | 9.16 | 0     |
| S16_vs_60186              | [full]    | 2504  | No  | NA   | 0 | 0 | Not-determined | Genome-fragment | NA   | 0     |
| S17_extracted_k141_52301  |           | 2802  | No  | NA   | 0 | 2 | Low-quality    | Genome-fragment | 6.67 | 0     |
| S16_vs_60401              | [full]    | 12116 | No  | NA   | 0 | 7 | Not-determined | Genome-fragment | NA   | 0     |
| S16_vs_60473              | [full]    | 1092  | No  | NA   | 0 | 1 | Not-determined | Genome-fragment | NA   | 0     |
| S5_extracted_k141_6177    |           | 2802  | Yes | 1380 | 1 | 0 | Low-quality    | Genome-fragment | 2.1  | 50.75 |
| S16_vs_60544              | [full]    | 1985  | No  | NA   | 0 | 2 | Not-determined | Genome-fragment | NA   | 0     |
| S7_vs_39143               | [full]    | 2802  | No  | NA   | 1 | 0 | Low-quality    | Genome-fragment | 6.08 | 0     |
| S16_vs_60588              | [full]    | 1956  | No  | NA   | 2 | 2 | Not-determined | Genome-fragment | NA   | 0     |
| S16_extracted_108202      |           | 2802  | No  | NA   | 0 | 2 | Low-quality    | Genome-fragment | 2.39 | 0     |
| S10_extracted_76831       |           | 2802  | No  | NA   | 1 | 0 | Low-quality    | Genome-fragment | 7.06 | 0     |
| S16_vs_60784              | [full]    | 1896  | No  | NA   | 2 | 2 | Not-determined | Genome-fragment | NA   | 0     |
| S16_vs_60875              | [full]    | 1049  | No  | NA   | 0 | 0 | Not-determined | Genome-fragment | NA   | 0     |
| S16_vs_60877              | [full]    | 5835  | No  | NA   | 0 | 3 | Not-determined | Genome-fragment | NA   | 0     |
| S16_vs_60977              | [full]    | 1734  | No  | NA   | 0 | 1 | Not-determined | Genome-fragment | NA   | 0     |
| S16_vs_61041              | [full]    | 2459  | No  | NA   | 3 | 2 | Not-determined | Genome-fragment | NA   | 0     |
| S12_extracted_k141_78208  |           | 2802  | No  | NA   | 0 | 0 | Low-quality    | Genome-fragment | 6.77 | 0     |
| S11_vs_k141_7257          | [full]    | 2804  | No  | NA   | 1 | 0 | Low-quality    | Genome-fragment | 4.86 | 0     |
| S13_vs_77340              | [full]    | 2804  | No  | NA   | 0 | 0 | Low-quality    | Genome-fragment | 5.08 | 0     |
| S1_vs_k141_134038         | [full]    | 2804  | No  | NA   | 1 | 0 | Low-quality    | Genome-fragment | 6.13 | 0     |
| S16_vs_61219              | [full]    | 2666  | No  | NA   | 0 | 2 | Not-determined | Genome-fragment | NA   | 0     |
| S16_vs_61250              | [full]    | 3515  | No  | NA   | 0 | 0 | Not-determined | Genome-fragment | NA   | 0     |
| S16_vs_61311              | [full]    | 1556  | No  | NA   | 0 | 1 | Not-determined | Genome-fragment | NA   | 0     |
| S5_vs_k141_109104         | [full]    | 2804  | No  | NA   | 2 | 0 | Low-quality    | Genome-fragment | 6.4  | 0     |
| S16_vs_61425              | [full]    | 8275  | No  | NA   | 0 | 3 | Not-determined | Genome-fragment | NA   | 0     |
| S16_vs_61511              | [full]    | 6963  | No  | NA   | 4 | 2 | Not-determined | Genome-fragment | NA   | 0     |
| S7_extracted_38476        |           | 2804  | No  | NA   | 2 | 0 | Low-quality    | Genome-fragment | 1.46 | 0     |
| S16_vs_61648              | [full]    | 1053  | No  | NA   | 0 | 1 | Not-determined | Genome-fragment | NA   | 0     |
| S16_vs_61751              | [full]    | 2422  | No  | NA   | 0 | 0 | Not-determined | Genome-fragment | NA   | 0     |
| S16_vs_61794              | [full]    | 1888  | No  | NA   | 0 | 2 | Not-determined | Genome-fragment | NA   | 0     |
| S8_vs_k141_199698         | [full]    | 2804  | No  | NA   | 0 | 0 | Low-quality    | Genome-fragment | 4.67 | 0     |
| S16_vs_61834              | [full]    | 1002  | No  | NA   | 1 | 2 | Not-determined | Genome-fragment | NA   | 0     |
| S16_vs_61951              | [full]    | 2254  | No  | NA   | 0 | 3 | Not-determined | Genome-fragment | NA   | 0     |
| S16_vs_62064              | [full]    | 1389  | No  | NA   | 0 | 0 | Not-determined | Genome-fragment | NA   | 0     |
| S8_vs_k141_12715          | [full]    | 2805  | No  | NA   | 0 | 1 | Low-quality    | Genome-fragment | 1.52 | 0     |
| S9_vs_k141_14806          | [full]    | 2807  | No  | NA   | 0 | 0 | Low-quality    | Genome-fragment | 6.11 | 0     |
| S16_vs_62089              | [full]    | 2207  | No  | NA   | 0 | 2 | Not-determined | Genome-fragment | NA   | 0     |
| S16_vs_62112              | [full]    | 4938  | No  | NA   | 0 | 3 | Not-determined | Genome-fragment | NA   | 0     |
| S3_extracted_k141_17921   |           | 2808  | No  | NA   | 0 | 0 | Low-quality    | Genome-fragment | 6.07 | 0     |
| S16_vs_62229              | [full]    | 2586  | No  | NA   | 0 | 2 | Not-determined | Genome-fragment | NA   | 0     |
| S16_vs_62239              | [full]    | 5311  | No  | NA   | 0 | 2 | Not-determined | Genome-fragment | NA   | 0     |
| S17_extracted_k141_126238 |           | 2809  | No  | NA   | 3 | 0 | Low-quality    | Genome-fragment | 4.58 | 0     |
| S16_vs_62273              | [full]    | 2421  | No  | NA   | 0 | 1 | Not-determined | Genome-fragment | NA   | 0     |
| S16_vs_62316              | [full]    | 1190  | No  | NA   | 0 | 0 | Not-determined | Genome-fragment | NA   | 0     |
| S16_vs_62446              | [full]    | 1312  | No  | NA   | 0 | 0 | Not-determined | Genome-fragment | NA   | 0     |
| S16_vs_62450              | [full]    | 1181  | No  | NA   | 0 | 0 | Not-determined | Genome-fragment | NA   | 0     |
| S16_vs_62495              | [full]    | 3382  | No  | NA   | 0 | 1 | Not-determined | Genome-fragment | NA   | 0     |
| S3_vs_k141_17753          | [full]    | 2809  | No  | NA   | 1 | 0 | Low-quality    | Genome-fragment | 4.93 | 0     |
| S16_vs_62580              | [full]    | 3864  | No  | NA   | 1 | 2 | Not-determined | Genome-fragment | NA   | 0     |
| S16_vs_62597              | [full]    | 3029  | No  | NA   | 0 | 2 | Not-determined | Genome-fragment | NA   | 0     |
| S16_vs_62599              | [full]    | 3262  | No  | NA   | 0 | 1 | Not-determined | Genome-fragment | NA   | 0     |
| S2_vs_k141_12684          | [full]    | 2810  | No  | NA   | 3 | 0 | Low-quality    | Genome-fragment | 1.68 | 0     |
| S8_vs_k141_5891           | [full]    | 2810  | No  | NA   | 1 | 0 | Low-quality    | Genome-fragment | 7.85 | 0     |
| S16_vs_62797              | [full]    | 8501  | No  | NA   | 0 | 2 | Not-determined | Genome-fragment | NA   | 0     |
| S16_vs_62892              | [full]    | 5497  | No  | NA   | 0 | 1 | Not-determined | Genome-fragment | NA   | 0     |
| S8_vs_k141_17462          | [full]    | 2810  | No  | NA   | 0 | 0 | Low-quality    | Genome-fragment | 4.17 | 0     |
| S16_vs_62934              | [full]    | 3202  | No  | NA   | 0 | 3 | Not-determined | Genome-fragment | NA   | 0     |
| S16_vs_62989              | [full]    | 9140  | No  | NA   | 0 | 6 | Not-determined | Genome-fragment | NA   | 0     |
| S14_vs_k141_47249         | [full]    | 2811  | No  | NA   | 2 | 2 | Low-quality    | Genome-fragment | 0.95 | 0     |
| S12_vs_k141_164580        | [full]    | 2811  | No  | NA   | 1 | 0 | Low-quality    | Genome-fragment | 4.73 | 0     |
| S16_vs_63346              | [full]    | 1527  | No  | NA   | 0 | 0 | Not-determined | Genome-fragment | NA   | 0     |
| S16_vs_63426              | [full]    | 2006  | No  | NA   | 0 | 0 | Not-determined | Genome-fragment | NA   | 0     |
| S16_vs_63674              | [full]    | 1258  | No  | NA   | 0 | 0 | Not-determined | Genome-fragment | NA   | 0     |
| S16_vs_63690              | [full]    | 1239  | No  | NA   | 0 | 1 | Not-determined | Genome-fragment | NA   | 0     |
| S5_vs_k141_144077         | [full]    | 2812  | No  | NA   | 5 | 5 | Low-quality    | Genome-fragment | 1.81 | 0     |
| S11_vs_k141_68276         | [full]    | 2813  | No  | NA   | 0 | 0 | Low-quality    | Genome-fragment | 6.42 | 0     |
| S5_vs_k141_32980          | [full]    | 2814  | No  | NA   | 4 | 0 | Low-quality    | Genome-fragment | 6.91 | 0     |
| S17_vs_k141_50185         | [full]    | 2815  | No  | NA   | 1 | 0 | Low-quality    | Genome-fragment | 1.74 | 0     |
| S16_vs_63816              | [full]    | 10407 | No  | NA   | 0 | 7 | Not-determined | Genome-fragment | NA   | 0     |
| S1_vs_k141_79215          | [full]    | 2815  | No  | NA   | 4 | 0 | Low-quality    | Genome-fragment | 4.78 | 0     |
| S17_vs_k141_148647        | [full]    | 2816  | No  | NA   | 0 | 3 | Low-quality    | Genome-fragment | 9.36 | 0     |
| S16_vs_64002              | [full]    | 2841  | No  | NA   | 0 | 0 | Not-determined | Genome-fragment | NA   | 0     |
| S11_vs_k141_31819         | [full]    | 2816  | No  | NA   | 0 | 0 | Low-quality    | Genome-fragment | 4.55 | 0     |
| S3_extracted_k141_111362  |           | 2816  | No  | NA   | 0 | 0 | Low-quality    | Genome-fragment | 1.76 | 0     |
| S16_vs_64183              | [full]    | 6385  | No  | NA   | 3 | 2 | Not-determined | Genome-fragment | NA   | 0     |
| S16_vs_64184              | [full]    | 6376  | No  | NA   | 0 | 4 | Not-determined | Genome-fragment | NA   | 0     |
| S16_vs_64273              | [full]    | 6253  | No  | NA   | 0 | 2 | Not-determined | Genome-fragment | NA   | 0     |
| S16_vs_64289              | [full]    | 1267  | No  | NA</ |   |   |                |                 |      |       |



|                          |       |     |      |   |                |                 |                 |      |       |
|--------------------------|-------|-----|------|---|----------------|-----------------|-----------------|------|-------|
| S16_v6_66766             | 2905  | No  | NA   | 0 | 2              | Not-determined  | Genome-fragment | NA   | 0     |
| S16_v6_66949             | 2976  | No  | NA   | 0 | 1              | Not-determined  | Genome-fragment | NA   | 0     |
| S16_v6_66963             | 3101  | No  | NA   | 0 | 1              | Not-determined  | Genome-fragment | NA   | 0     |
| S7_v6_94481              | 2823  | No  | NA   | 2 | 0              | Low-quality     | Genome-fragment | 5.74 | 0     |
| S16_v6_67073             | 6428  | No  | NA   | 0 | 2              | Not-determined  | Genome-fragment | NA   | 0     |
| S16_v6_67233             | 3230  | No  | NA   | 0 | 2              | Not-determined  | Genome-fragment | NA   | 0     |
| S16_v6_67294             | 4198  | No  | NA   | 0 | 3              | Not-determined  | Genome-fragment | NA   | 0     |
| S5_v6_k141_106815        | 2824  | No  | NA   | 3 | 0              | Low-quality     | Genome-fragment | 6.99 | 0     |
| S7_v6_4355               | 2824  | Yes | 2462 | 1 | 1              | Low-quality     | Genome-fragment | 3.45 | 12.82 |
| S16_v6_110107            | 2824  | No  | NA   | 0 | 1              | Low-quality     | Genome-fragment | 3.43 | 0     |
| S16_v6_67638             | 1499  | No  | NA   | 0 | 0              | Not-determined  | Genome-fragment | NA   | 0     |
| S3_v6_k141_125024        | 2825  | No  | NA   | 0 | 0              | Low-quality     | Genome-fragment | 1.84 | 0     |
| S5_v6_k141_54660         | 2825  | No  | NA   | 2 | 0              | Low-quality     | Genome-fragment | 8.19 | 0     |
| S16_v6_127937            | 2825  | No  | NA   | 0 | 0              | Low-quality     | Genome-fragment | 4.84 | 0     |
| S16_v6_67740             | 2029  | No  | NA   | 0 | 0              | Not-determined  | Genome-fragment | NA   | 0     |
| S8_extracted_k141_163323 | 2825  | No  | NA   | 1 | 0              | Low-quality     | Genome-fragment | 1.08 | 0     |
| S9_v6_k141_22454         | 2826  | No  | NA   | 2 | 0              | Low-quality     | Genome-fragment | 4.69 | 0     |
| S16_v6_67896             | 2065  | No  | NA   | 0 | 2              | Not-determined  | Genome-fragment | NA   | 0     |
| S14_v6_k141_115020       | 2826  | No  | NA   | 0 | 0              | Low-quality     | Genome-fragment | 7.21 | 0     |
| S16_v6_67990             | 1899  | No  | NA   | 0 | 2              | Not-determined  | Genome-fragment | NA   | 0     |
| S16_v6_68036             | 4472  | No  | NA   | 0 | 0              | Not-determined  | Genome-fragment | NA   | 0     |
| S16_v6_68117             | 6891  | No  | NA   | 0 | 4              | Not-determined  | Genome-fragment | NA   | 0     |
| S1_v6_k141_82421         | 2826  | No  | NA   | 2 | 0              | Low-quality     | Genome-fragment | 7.33 | 0     |
| S16_v6_68160             | 4980  | No  | NA   | 0 | 3              | Not-determined  | Genome-fragment | NA   | 0     |
| S1_v6_k141_126342        | 2826  | No  | NA   | 1 | 0              | Low-quality     | Genome-fragment | 4.75 | 0     |
| S16_v6_68262             | 5624  | No  | NA   | 0 | 6              | Not-determined  | Genome-fragment | NA   | 0     |
| S16_v6_68254             | 1222  | No  | NA   | 0 | 0              | Not-determined  | Genome-fragment | NA   | 0     |
| S3_v6_k141_17922         | 2826  | No  | NA   | 2 | 0              | Low-quality     | Genome-fragment | 4.91 | 0     |
| S16_v6_68327             | 3356  | No  | NA   | 2 | Not-determined | Genome-fragment | NA              | 0    | 0     |
| S16_v6_68331             | 1319  | No  | NA   | 0 | 1              | Not-determined  | Genome-fragment | NA   | 0     |
| S16_v6_68350             | 2807  | No  | NA   | 0 | 0              | Not-determined  | Genome-fragment | NA   | 0     |
| S16_v6_68511             | 1095  | No  | NA   | 0 | 0              | Not-determined  | Genome-fragment | NA   | 0     |
| S5_v6_k141_59875         | 2826  | No  | NA   | 0 | 1              | Low-quality     | Genome-fragment | 1.52 | 0     |
| S7_v6_959                | 2826  | No  | NA   | 3 | 0              | Low-quality     | Genome-fragment | 7.02 | 0     |
| S16_v6_68896             | 9914  | No  | NA   | 0 | 5              | Not-determined  | Genome-fragment | NA   | 0     |
| S16_v6_68715             | 2268  | No  | NA   | 0 | 2              | Not-determined  | Genome-fragment | NA   | 0     |
| S11_v6_k141_67575        | 8827  | No  | NA   | 1 | 0              | Low-quality     | Genome-fragment | 6.02 | 0     |
| S16_v6_68774             | 8932  | No  | NA   | 0 | 3              | Not-determined  | Genome-fragment | NA   | 0     |
| S1_extracted_k141_46607  | 2827  | No  | NA   | 0 | 0              | Low-quality     | Genome-fragment | 7.06 | 0     |
| S16_v6_68899             | 2108  | No  | NA   | 0 | 2              | Not-determined  | Genome-fragment | NA   | 0     |
| S16_v6_69013             | 2033  | No  | NA   | 0 | 0              | Not-determined  | Genome-fragment | NA   | 0     |
| S10_v6_68404             | 2827  | No  | NA   | 2 | 0              | Low-quality     | Genome-fragment | 0.81 | 0     |
| S16_v6_69230             | 6232  | No  | NA   | 0 | 2              | Not-determined  | Genome-fragment | NA   | 0     |
| S16_v6_69336             | 1057  | No  | NA   | 0 | 0              | Not-determined  | Genome-fragment | NA   | 0     |
| S16_v6_69402             | 3315  | No  | NA   | 0 | 1              | Not-determined  | Genome-fragment | NA   | 0     |
| S16_v6_69520             | 2912  | No  | NA   | 0 | 2              | Not-determined  | Genome-fragment | NA   | 0     |
| S16_v6_69660             | 10217 | No  | NA   | 0 | 7              | Not-determined  | Genome-fragment | NA   | 0     |
| S15_v6_64025             | 2827  | No  | NA   | 0 | 0              | Low-quality     | Genome-fragment | 1.5  | 0     |
| S8_v6_k141_19079         | 2827  | No  | NA   | 0 | 2              | Low-quality     | Genome-fragment | 1.3  | 0     |
| S16_v6_69929             | 1109  | No  | NA   | 0 | 0              | Not-determined  | Genome-fragment | NA   | 0     |
| S13_v6_52000             | 2828  | No  | NA   | 0 | 0              | Low-quality     | Genome-fragment | 2    | 0     |
| S2_extracted_k141_54725  | 2828  | No  | NA   | 0 | 0              | Low-quality     | Genome-fragment | 9.32 | 0     |
| S16_v6_70196             | 1907  | No  | NA   | 0 | 1              | Not-determined  | Genome-fragment | NA   | 0     |
| S16_v6_70245             | 1398  | No  | NA   | 0 | 0              | Not-determined  | Genome-fragment | NA   | 0     |
| S16_v6_70251             | 1283  | No  | NA   | 0 | 0              | Not-determined  | Genome-fragment | NA   | 0     |
| S16_v6_70256             | 1708  | No  | NA   | 0 | 0              | Not-determined  | Genome-fragment | NA   | 0     |
| S3_extracted_k141_206445 | 2828  | No  | NA   | 2 | 0              | Low-quality     | Genome-fragment | 1.8  | 0     |
| S16_v6_70377             | 1823  | No  | NA   | 0 | 1              | Not-determined  | Genome-fragment | NA   | 0     |
| S16_v6_70381             | 1114  | No  | NA   | 0 | 0              | Not-determined  | Genome-fragment | NA   | 0     |
| S16_v6_60570             | 2828  | No  | NA   | 1 | 0              | Low-quality     | Genome-fragment | 3.26 | 0     |
| S16_v6_70436             | 2808  | No  | NA   | 0 | 1              | Not-determined  | Genome-fragment | NA   | 0     |
| S10_extracted_82083      | 2828  | No  | NA   | 0 | 0              | Low-quality     | Genome-fragment | 1.25 | 0     |
| S16_v6_70504             | 1569  | No  | NA   | 0 | 2              | Not-determined  | Genome-fragment | NA   | 0     |
| S17_v6_k141_23778        | 2830  | No  | NA   | 0 | 2              | Low-quality     | Genome-fragment | 4.45 | 0     |
| S16_v6_70599             | 1918  | No  | NA   | 0 | 2              | Not-determined  | Genome-fragment | NA   | 0     |
| S3_v6_k141_27721         | 2830  | No  | NA   | 0 | 2              | Low-quality     | Genome-fragment | 0.67 | 0     |
| S7_v6_2686               | 2831  | No  | NA   | 0 | 0              | Low-quality     | Genome-fragment | 6.68 | 0     |
| S16_v6_70709             | 2163  | No  | NA   | 0 | 1              | Not-determined  | Genome-fragment | NA   | 0     |
| S12_v6_k141_1497929      | 2831  | No  | NA   | 0 | 0              | Low-quality     | Genome-fragment | 2.94 | 0     |
| S16_v6_70933             | 3614  | No  | NA   | 0 | 2              | Not-determined  | Genome-fragment | NA   | 0     |
| S16_v6_71000             | 1518  | No  | NA   | 0 | 1              | Not-determined  | Genome-fragment | NA   | 0     |
| S16_v6_71046             | 1594  | No  | NA   | 0 | 1              | Not-determined  | Genome-fragment | NA   | 0     |
| S16_v6_71136             | 1709  | No  | NA   | 0 | 3              | Not-determined  | Genome-fragment | NA   | 0     |
| S16_v6_71544             | 7432  | No  | NA   | 0 | 2              | Not-determined  | Genome-fragment | NA   | 0     |
| S5_v6_k141_100540        | 2832  | No  | NA   | 4 | 0              | Low-quality     | Genome-fragment | 4.4  | 0     |
| S16_v6_71187             | 3200  | No  | NA   | 0 | 2              | Not-determined  | Genome-fragment | NA   | 0     |
| S16_v6_49579             | 2832  | No  | NA   | 1 | 0              | Low-quality     | Genome-fragment | 5.64 | 0     |
| S16_v6_71451             | 5431  | No  | NA   | 0 | 4              | Not-determined  | Genome-fragment | NA   | 0     |
| S12_v6_k141_137474       | 2832  | No  | NA   | 0 | 0              | Low-quality     | Genome-fragment | 2.71 | 0     |
| S16_v6_71473             | 1172  | No  | NA   | 0 | 1              | Not-determined  | Genome-fragment | NA   | 0     |
| S16_v6_71598             | 1990  | No  | NA   | 0 | 3              | Not-determined  | Genome-fragment | NA   | 0     |
| S11_v6_k141_111          | 2833  | No  | NA   | 0 | 0              | Low-quality     | Genome-fragment | 7.51 | 0     |
| S8_v6_k141_42907         | 2833  | No  | NA   | 2 | 0              | Low-quality     | Genome-fragment | 9.01 | 0     |
| S16_v6_73616             | 2834  | No  | NA   | 1 | 0              | Low-quality     | Genome-fragment | 1.62 | 0     |
| S16_v6_71835             | 4414  | No  | NA   | 1 | 2              | Not-determined  | Genome-fragment | NA   | 0     |
| S16_v6_71856             | 2692  | No  | NA   | 0 | 1              | Not-determined  | Genome-fragment | NA   | 0     |
| S7_v6_110430             | 2835  | No  | NA   | 0 | 0              | Low-quality     | Genome-fragment | 5.97 | 0     |
| S16_v6_71979             | 16784 | No  | NA   | 0 | 7              | Not-determined  | Genome-fragment | NA   | 0     |
| S9_v6_k141_68489         | 7836  | No  | NA   | 0 | 0              | Low-quality     | Genome-fragment | 4.07 | 0     |
| S16_v6_72073             | 1252  | No  | NA   | 0 | 0              | Not-determined  | Genome-fragment | NA   | 0     |
| S16_v6_72111             | 3060  | No  | NA   | 0 | 0              | Not-determined  | Genome-fragment | NA   | 0     |
| S7_v6_113706             | 2836  | No  | NA   | 2 | 0              | Low-quality     | Genome-fragment | 1.97 | 0     |
| S16_v6_72285             | 3209  | No  | NA   | 0 | 2              | Not-determined  | Genome-fragment | NA   | 0     |
| S10_v6_38112             | 2836  | No  | NA   | 0 | 3              | Low-quality     | Genome-fragment | 2.29 | 0     |
| S16_v6_72395             | 1279  | No  | NA   | 1 | Not-determined | Genome-fragment | NA              | 0    | 0     |
| S16_v6_72405             | 8181  | No  | NA   | 0 | 6              | Not-determined  | Genome-fragment | NA   | 0     |
| S16_v6_72517             | 1360  | No  | NA   | 0 | 0              | Not-determined  | Genome-fragment | NA   | 0     |
| S16_v6_72631             | 3142  | No  | NA   | 0 | 2              | Not-determined  | Genome-fragment | NA   | 0     |
| S16_v6_72766             | 1384  | No  | NA   | 0 | 0              | Not-determined  | Genome-fragment | NA   | 0     |
| S10_v6_9376              | 2837  | No  | NA   | 1 | 0              | Low-quality     | Genome-fragment | 5.31 | 0     |
| S16_v6_72827             | 3015  | No  | NA   | 0 | 1              | Not-determined  | Genome-fragment | NA   | 0     |
| S16_v6_72851             | 1539  | No  | NA   | 0 | 1              | Not-determined  | Genome-fragment | NA   | 0     |
| S16_v6_72916             | 1494  | No  | NA   | 0 | 0              | Not-determined  | Genome-fragment | NA   | 0     |
| S16_v6_10488             | 2837  | No  | NA   | 0 | 0              | Low-quality     | Genome-fragment | 1.74 | 0     |
| S16_v6_72974             | 1588  | No  | NA   | 1 | Not-determined | Genome-fragment | NA              | 0    | 0     |
| S8_extracted_k141_187457 | 2837  | No  | NA   | 3 | 0              | Low-quality     | Genome-fragment | 4.63 | 0     |
| S16_v6_154246            | 2838  | No  | NA   | 3 | 0              | Low-quality     | Genome-fragment | 6.09 | 0     |
| S16_v6_48098             | 2838  | No  | NA   | 0 | 0              | Low-quality     | Genome-fragment | 4.15 | 0     |
| S16_v6_73083             | 1904  | No  | NA   | 0 | 2              | Not-determined  | Genome-fragment | NA   | 0     |
| S9_v6_k141_84681         | 2839  | No  | NA   | 1 | 0              | Low-quality     | Genome-fragment | 6.97 | 0     |
| S16_v6_73349             | 6714  | No  | NA   | 0 | 1              | Not-determined  | Genome-fragment | NA   | 0     |
| S16_v6_73360             | 4358  | No  | NA   | 0 | 3              | Not-determined  | Genome-fragment | NA   | 0     |
| S16_v6_73394             | 2382  | No  | NA   | 0 | 1              | Not-determined  | Genome-fragment | NA   | 0     |
| S14_extracted_k141_7830  | 2839  | No  | NA   | 6 | 0              | Low-quality     | Genome-fragment | 9.36 | 0     |
| S5_v6_k141_62020         | 2839  | No  | NA   | 0 | 0              | Low-quality     | Genome-fragment | 7.69 | 0     |
| S16_v6_73851             | 3183  | No  | NA   | 0 | 2              | Not-determined  | Genome-fragment | NA   | 0     |
| S16_v6_73889             | 3127  | No  | NA   | 0 | 2              | Not-determined  | Genome-fragment | NA   | 0     |
| S16_v6_64143             | 2839  | No  | NA   | 1 | 0              | Low-quality     | Genome-fragment | 1.95 | 0     |
| S16_v6_45780             | 2839  | No  | NA   | 2 | 0              | Low-quality     | Genome-fragment | 8.05 | 0     |
| S8_extracted_k141_54374  | 2839  | No  | NA   | 0 | 1              | Low-quality     | Genome-fragment | 4.32 | 0     |
| S14_v6_k141_10308        | 2840  | No  | NA   | 0 | 0              | Low-quality     | Genome-fragment | 8.04 | 0     |
| S3_v6_k141_56229         | 2840  | No  | NA   | 0 | 0              | Low-quality     | Genome-fragment | 6.88 | 0     |
| S7_v6_74781              | 4961  | No  | NA   | 0 | 0              | Not-determined  | Genome-fragment | NA   | 0     |
| S16_v6_57210             | 2840  | No  | NA   | 0 | 3              | Low-quality     | Genome-fragment | 0.94 | 0     |
| S6_v6_k141_11915         | 2840  | No  | NA   | 0 | 0              | Low-quality     | Genome-fragment | 6.79 | 0     |
| S16_v6_74859             | 2847  | No  | NA   | 0 | 5              | Not-determined  | Genome-fragment | NA   | 0     |
| S8_extracted_k141_9979   | 2840  | No  | NA   | 1 | 0              | Low-quality     | Genome-fragment | 6.53 | 0     |
| S11_v6_k141_635          | 2841  | No  | NA   | 0 | 0              | Low-quality     | Genome-fragment | 7.24 | 0     |
| S16_v6_75079             | 1810  | No  | NA   | 0 | 0              | Not-determined  | Genome-fragment | NA   | 0     |
| S16_v6_75084             | 3106  | No  | NA   | 0 | 3              | Not-determined  | Genome-fragment | NA   | 0     |
| S16_v6_75220             | 1090  | No  | NA   | 0 | 1              | Not-determined  | Genome-fragment | NA   | 0     |
| S16_v6_75242             | 10762 | No  | NA   | 3 | 6              | Not-determined  | Genome-fragment | NA   | 0     |
| S12_v6_k141_6731         | 2841  | Yes | 1014 | 1 | 1              | Low-quality     | Genome-fragment | 0.68 | 64.31 |
| S17_v6_k141_141223       | 2842  | No  | NA   | 0 | 2              | Low-quality     | Genome-fragment | 6.19 | 0     |
| S16_v6_75430             | 2641  | No  | NA   | 0 | 1              | Not-determined  | Genome-fragment | NA   | 0     |
| S8_v6_k141_51954         | 2843  | No  | NA   | 0 | 0              | Low-quality     | Genome-fragment | 6.02 | 0     |
| S12_v6_k141_155715       | 2844  | No  | NA   | 0 | 0              | Low-quality     | Genome-fragment | 5.94 | 0     |
| S3_v6_k141_19435         | 2845  | No  | NA   | 1 | 0              | Low-quality     | Genome-fragment | 4.96 | 0     |
| S8_v6_k141_132476        | 2845  | No  | NA   | 1 | 0              | Low-quality     | Genome-fragment | 1.52 | 0     |
| S16_v6_75540             | 10043 | No  | NA   | 0 | 5              | Not-determined  | Genome-fragment | NA   | 0     |
| S16_v6_75747             | 1338  | No  | NA   | 0 | 1              | Not-determined  | Genome-fragment | NA   | 0     |
| S9_v6_k141_40253         | 2846  | No  | NA   | 0 | 0              | Low-quality     | Genome-fragment | 7.03 | 0     |
| S16_v6_75849             | 1860  | No  | NA   | 0 | 1              | Not-determined  | Genome-fragment | NA   | 0     |
| S16_v6_75870             | 1635  | No  | NA   | 0 | 0              | Not-determined  | Genome-fragment | NA   | 0     |
| S9_v6_k141_3180          | 2846  | No  | NA   | 0 | 1              | Low-quality     | Genome-fragment | 2.08 | 0     |
| S16_v6_75950             | 2153  | No  | NA   | 0 | 0              | Not-determined  | Genome-fragment | NA   | 0     |
| S16_v6_6442              | 2846  | No  | NA   | 1 | 0              | Low-quality     | Genome-fragment | 3.53 | 0     |
| S12_v6_k141_35894        | 2846  | No  | NA   | 1 | 0              | Low-quality     | Genome-fragment | 1.4  | 0     |
| S8_v6_k141_8278          | 2846  | No  | NA   | 0 | 2              | Low-quality     | Genome-fragment | 1.48 | 0     |



|                           |           |        |     |       |    |                |                 |                 |                 |       |
|---------------------------|-----------|--------|-----|-------|----|----------------|-----------------|-----------------|-----------------|-------|
| S16_vo_77656              | [full]    | 4925   | No  | NA    | 0  | 0              | Not-determined  | Genome-fragment | NA              | 0     |
| S16_vo_77704              | [full]    | 2233   | No  | NA    | 0  | 0              | Not-determined  | Genome-fragment | NA              | 0     |
| S16_vo_77808              | [full]    | 2116   | No  | NA    | 0  | 0              | Not-determined  | Genome-fragment | NA              | 0     |
| S16_vo_77812              | [full]    | 1031   | No  | NA    | 0  | 1              | Not-determined  | Genome-fragment | NA              | 0     |
| S8_extracted_k141_1844    |           | 2850   | No  | NA    | 1  | 0              | Low-quality     | Genome-fragment | NA              | 6.98  |
| S16_vo_77831              | [full]    | 3399   | No  | NA    | 0  | 4              | Not-determined  | Genome-fragment | NA              | 0     |
| S16_vo_78011              | [full]    | 4196   | No  | NA    | 0  | 0              | Not-determined  | Genome-fragment | NA              | 0     |
| S11_vo_k141_71854         | [full]    | 2851   | No  | NA    | 3  | 0              | Low-quality     | Genome-fragment | NA              | 8.24  |
| S16_vo_78089              | [full]    | 2236   | No  | NA    | 1  | Not-determined | Genome-fragment | NA              | 0               |       |
| S16_vo_78101              | [full]    | 3158   | No  | NA    | 0  | 2              | Not-determined  | Genome-fragment | NA              | 0     |
| S1_vo_k141_130675         | [full]    | 2851   | No  | NA    | 0  | 1              | Low-quality     | Genome-fragment | NA              | 1.34  |
| S16_vo_78218              | [full]    | 1022   | No  | NA    | 0  | 0              | Not-determined  | Genome-fragment | NA              | 0     |
| S16_vo_78241              | [full]    | 5766   | No  | NA    | 0  | 3              | Not-determined  | Genome-fragment | NA              | 0     |
| S16_vo_78350              | [full]    | 1726   | No  | NA    | 0  | 1              | Not-determined  | Genome-fragment | NA              | 0     |
| S16_vo_78500              | [full]    | 1873   | No  | NA    | 0  | 2              | Not-determined  | Genome-fragment | NA              | 0     |
| S3_vo_k141_118601         | [full]    | 2851   | No  | NA    | 0  | 0              | Low-quality     | Genome-fragment | NA              | 1.74  |
| S16_vo_42505              | [full]    | 2851   | No  | NA    | 3  | 0              | Low-quality     | Genome-fragment | NA              | 5.33  |
| S16_vo_117133             | [full]    | 2851   | No  | NA    | 1  | 0              | Low-quality     | Genome-fragment | NA              | 3.9   |
| S10_vo_86052              | [full]    | 2851   | No  | NA    | 1  | Low-quality    | Genome-fragment | NA              | 5.14            |       |
| S14_vo_k141_48346         | [full]    | 2852   | No  | NA    | 0  | 0              | Low-quality     | Genome-fragment | NA              | 5.3   |
| S16_vo_78757              | [full]    | 1236   | No  | NA    | 0  | 0              | Not-determined  | Genome-fragment | NA              | 0     |
| S5_extracted_k141_54945   |           | 2852   | No  | NA    | 0  | 1              | Low-quality     | Genome-fragment | NA              | 4.76  |
| S16_vo_79123              | [full]    | 1875   | No  | NA    | 0  | 0              | Not-determined  | Genome-fragment | NA              | 0     |
| S16_vo_79127              | [full]    | 1354   | No  | NA    | 0  | 2              | Not-determined  | Genome-fragment | NA              | 0     |
| S12_extracted_k141_140786 |           | 2852   | No  | NA    | 1  | 0              | Low-quality     | Genome-fragment | NA              | 6.47  |
| S5_extracted_k141_143079  |           | 2853   | Yes | 2081  | 1  | 1              | Low-quality     | Genome-fragment | NA              | 0.74  |
| S5_vo_k141_36759          | [full]    | 2853   | No  | NA    | 2  | 0              | Low-quality     | Genome-fragment | NA              | 5.82  |
| S16_vo_50242              | [full]    | 2853   | No  | NA    | 0  | 1              | Low-quality     | Genome-fragment | NA              | 3.71  |
| S16_vo_79386              | [full]    | 1060   | No  | NA    | 0  | 0              | Not-determined  | Genome-fragment | NA              | 0     |
| S1_vo_k141_45260          | [full]    | 2854   | No  | NA    | 3  | 0              | Low-quality     | Genome-fragment | NA              | 6.27  |
| S3_extracted_k141_17198   |           | 2854   | No  | NA    | 2  | 0              | Low-quality     | Genome-fragment | NA              | 4.47  |
| S3_extracted_k141_97667   |           | 2855   | No  | NA    | 0  | 0              | Low-quality     | Genome-fragment | NA              | 4.75  |
| S3_vo_k141_42231          | [full]    | 2855   | No  | NA    | 0  | 0              | Low-quality     | Genome-fragment | NA              | 1.67  |
| S16_vo_79658              | [full]    | 1031   | No  | NA    | 0  | 0              | Not-determined  | Genome-fragment | NA              | 0     |
| S2_vo_k141_59258          | [full]    | 2855   | No  | NA    | 0  | 0              | Low-quality     | Genome-fragment | NA              | 6.25  |
| S16_vo_80038              | [full]    | 4773   | No  | NA    | 4  | Not-determined | Genome-fragment | NA              | 0               |       |
| S10_vo_48131              | [full]    | 2855   | No  | NA    | 2  | 0              | Low-quality     | Genome-fragment | NA              | 7.25  |
| S4_vo_ViSorder_9937-cat_2 |           | 2855   | No  | NA    | 6  | 0              | Low-quality     | Genome-fragment | NA              | 9.41  |
| S16_vo_80190              | [full]    | 2555   | No  | NA    | 0  | 1              | Not-determined  | Genome-fragment | NA              | 0     |
| S16_vo_80244              | [full]    | 54066  | No  | NA    | 15 | 4              | High-quality    | High-quality    | Genome-fragment | 93.8  |
| S13_vo_128033             | [full]    | 2856   | No  | NA    | 0  | 0              | Low-quality     | Genome-fragment | NA              | 7.13  |
| S16_vo_80672              | [full]    | 3998   | No  | NA    | 0  | 0              | Not-determined  | Genome-fragment | NA              | 0     |
| S7_vo_50465               | [full]    | 2856   | No  | NA    | 3  | 0              | Low-quality     | Genome-fragment | NA              | 6.43  |
| S8_extracted_k141_175998  |           | 2856   | No  | NA    | 5  | 0              | Low-quality     | Genome-fragment | NA              | 6.14  |
| S16_vo_80993              | [full]    | 1960   | No  | NA    | 0  | 2              | Not-determined  | Genome-fragment | NA              | 0     |
| S16_vo_80999              | [full]    | 1257   | No  | NA    | 0  | 1              | Not-determined  | Genome-fragment | NA              | 0     |
| S16_vo_81032              | [full]    | 2342   | No  | NA    | 0  | 1              | Not-determined  | Genome-fragment | NA              | 0     |
| S2_vo_k141_472            | [full]    | 2857   | No  | NA    | 0  | 0              | Low-quality     | Genome-fragment | NA              | 6.22  |
| S16_vo_81071              | [full]    | 2156   | No  | NA    | 0  | 2              | Not-determined  | Genome-fragment | NA              | 0     |
| S16_vo_81077              | [full]    | 5136   | No  | NA    | 0  | 0              | Not-determined  | Genome-fragment | NA              | 0     |
| S16_vo_81188              | [full]    | 4304   | No  | NA    | 0  | 3              | Not-determined  | Genome-fragment | NA              | 0     |
| S16_vo_81259              | [full]    | 7000   | No  | NA    | 4  | Not-determined | Genome-fragment | NA              | 0               |       |
| S5_vo_k141_124308         | [full]    | 2858   | No  | NA    | 3  | 0              | Low-quality     | Genome-fragment | NA              | 6.21  |
| S9_vo_k141_78069          | [full]    | 2859   | No  | NA    | 4  | 0              | Low-quality     | Genome-fragment | NA              | 5.94  |
| S13_extracted_k145        |           | 2859   | No  | NA    | 0  | 0              | Low-quality     | Genome-fragment | NA              | 7.01  |
| S16_vo_81457              | [full]    | 1919   | No  | NA    | 0  | 1              | Not-determined  | Genome-fragment | NA              | 0     |
| S16_vo_81492              | [full]    | 2618   | No  | NA    | 0  | 0              | Not-determined  | Genome-fragment | NA              | 0     |
| S16_vo_81549              | [full]    | 1996   | No  | NA    | 0  | 2              | Not-determined  | Genome-fragment | NA              | 0     |
| S12_vo_k141_34612         | [full]    | 2859   | No  | NA    | 2  | 0              | Low-quality     | Genome-fragment | NA              | 7.94  |
| S3_vo_k141_35724          | [IntZyme] | 2861   | No  | NA    | 1  | 0              | Low-quality     | Genome-fragment | NA              | 4.17  |
| S16_extracted_166272      |           | 2861   | No  | NA    | 1  | 0              | Low-quality     | Genome-fragment | NA              | 7.87  |
| S16_vo_81803              | [full]    | 32483  | No  | NA    | 17 | 0              | Not-determined  | Genome-fragment | NA              | 88.09 |
| S10_vo_52918              | [full]    | 2861   | No  | NA    | 1  | 0              | Low-quality     | Genome-fragment | NA              | 5.71  |
| S16_vo_82004              | [full]    | 6450   | No  | NA    | 0  | 3              | Not-determined  | Genome-fragment | NA              | 0     |
| S17_extracted_k141_44122  |           | 2862   | No  | NA    | 0  | 0              | Low-quality     | Genome-fragment | NA              | 4.92  |
| S16_vo_82087              | [full]    | 1042   | No  | NA    | 0  | 0              | Not-determined  | Genome-fragment | NA              | 0     |
| S16_vo_82094              | [full]    | 1245   | No  | NA    | 0  | 0              | Not-determined  | Genome-fragment | NA              | 0     |
| S16_vo_82116              | [full]    | 113606 | Yes | 40122 | 19 | 56             | High-quality    | High-quality    | Genome-fragment | 100   |
| S11_vo_k141_48021         | [full]    | 2862   | No  | NA    | 0  | 0              | Low-quality     | Genome-fragment | NA              | 7.42  |
| S16_vo_82424              | [full]    | 6889   | No  | NA    | 2  | 0              | Not-determined  | Genome-fragment | NA              | 0     |
| S11_vo_k141_58397         | [full]    | 2863   | No  | NA    | 1  | 0              | Low-quality     | Genome-fragment | NA              | 8.37  |
| S12_vo_k141_35497         | [full]    | 2863   | No  | NA    | 0  | 0              | Low-quality     | Genome-fragment | NA              | 5.72  |
| S2_vo_k141_4182           | [full]    | 2863   | No  | NA    | 2  | 0              | Low-quality     | Genome-fragment | NA              | 1.78  |
| S16_vo_82633              | [full]    | 2097   | No  | NA    | 0  | 0              | Not-determined  | Genome-fragment | NA              | 0     |
| S16_vo_82642              | [full]    | 3369   | No  | NA    | 3  | Not-determined | Genome-fragment | NA              | 0               |       |
| S16_vo_82663              | [full]    | 10552  | No  | NA    | 0  | 7              | Not-determined  | Genome-fragment | NA              | 0     |
| S16_vo_82716              | [full]    | 6461   | No  | NA    | 0  | 3              | Not-determined  | Genome-fragment | NA              | 0     |
| S5_extracted_k141_13111   |           | 2864   | No  | NA    | 4  | 0              | Low-quality     | Genome-fragment | NA              | 6.88  |
| S7_vo_122837              | [full]    | 2864   | No  | NA    | 0  | 0              | Low-quality     | Genome-fragment | NA              | 7.3   |
| S16_vo_82858              | [full]    | 2122   | No  | NA    | 0  | 1              | Not-determined  | Genome-fragment | NA              | 0     |
| S16_vo_82953              | [full]    | 1458   | No  | NA    | 0  | 1              | Not-determined  | Genome-fragment | NA              | 0     |
| S16_vo_82959              | [full]    | 2088   | No  | NA    | 0  | 1              | Not-determined  | Genome-fragment | NA              | 0     |
| S4_extracted_9902         |           | 2864   | No  | NA    | 1  | 0              | Low-quality     | Genome-fragment | NA              | 1.55  |
| S16_vo_83120              | [full]    | 2461   | No  | NA    | 0  | 1              | Not-determined  | Genome-fragment | NA              | 5.0   |
| S17_vo_k141_167536        | [full]    | 2865   | No  | NA    | 0  | 0              | Low-quality     | Genome-fragment | NA              | 5.51  |
| S13_vo_16848              | [full]    | 2865   | No  | NA    | 0  | 1              | Low-quality     | Genome-fragment | NA              | 1.89  |
| S16_vo_83234              | [full]    | 4473   | No  | NA    | 0  | 3              | Not-determined  | Genome-fragment | NA              | 0     |
| S4_extracted_1970         |           | 2865   | No  | NA    | 9  | 0              | Low-quality     | Genome-fragment | NA              | 9.45  |
| S16_vo_83375              | [full]    | 2180   | No  | NA    | 1  | Not-determined | Genome-fragment | NA              | 0               |       |
| S16_vo_83442              | [full]    | 1141   | No  | NA    | 0  | 1              | Not-determined  | Genome-fragment | NA              | 0     |
| S16_vo_83508              | [full]    | 1446   | No  | NA    | 0  | 3              | Not-determined  | Genome-fragment | NA              | 0     |
| S16_vo_83516              | [full]    | 2442   | No  | NA    | 0  | 1              | Not-determined  | Genome-fragment | NA              | 0     |
| S16_vo_83518              | [full]    | 5740   | No  | NA    | 0  | 3              | Not-determined  | Genome-fragment | NA              | 0     |
| S16_vo_83668              | [full]    | 1244   | No  | NA    | 0  | 1              | Not-determined  | Genome-fragment | NA              | 0     |
| S17_vo_k141_30859         | [full]    | 2866   | No  | NA    | 0  | 0              | Low-quality     | Genome-fragment | NA              | 3.86  |
| S3_vo_k141_33713          | [full]    | 2866   | No  | NA    | 1  | 0              | Low-quality     | Genome-fragment | NA              | 7     |
| S16_vo_83900              | [full]    | 1883   | No  | NA    | 0  | 0              | Not-determined  | Genome-fragment | NA              | 0     |
| S16_vo_83905              | [full]    | 2367   | No  | NA    | 0  | 1              | Not-determined  | Genome-fragment | NA              | 0     |
| S3_vo_k141_100276         | [full]    | 2866   | No  | NA    | 0  | 0              | Low-quality     | Genome-fragment | NA              | 1.77  |
| S16_vo_83934              | [full]    | 1720   | No  | NA    | 0  | 0              | Not-determined  | Genome-fragment | NA              | 0     |
| S16_vo_83945              | [full]    | 1421   | No  | NA    | 0  | 0              | Not-determined  | Genome-fragment | NA              | 0     |
| S16_vo_84125              | [full]    | 6281   | No  | NA    | 0  | 2              | Not-determined  | Genome-fragment | NA              | 0     |
| S16_vo_158000             | [full]    | 2866   | No  | NA    | 0  | 2              | Low-quality     | Genome-fragment | NA              | 1.18  |
| S12_extracted_k141_125655 |           | 2866   | No  | NA    | 2  | 0              | Low-quality     | Genome-fragment | NA              | 7.41  |
| S16_vo_84376              | [full]    | 1717   | No  | NA    | 0  | 2              | Not-determined  | Genome-fragment | NA              | 0     |
| S16_vo_84398              | [full]    | 4879   | No  | NA    | 0  | 0              | Not-determined  | Genome-fragment | NA              | 0     |
| S16_vo_84489              | [full]    | 2352   | No  | NA    | 0  | 0              | Not-determined  | Genome-fragment | NA              | 0     |
| S12_vo_k141_50545         | [full]    | 2866   | No  | NA    | 1  | 0              | Low-quality     | Genome-fragment | NA              | 6.91  |
| S17_vo_k141_98797         | [full]    | 2867   | No  | NA    | 0  | 0              | Low-quality     | Genome-fragment | NA              | 4.13  |
| S16_vo_84788              | [full]    | 1670   | No  | NA    | 0  | 1              | Not-determined  | Genome-fragment | NA              | 0     |
| S9_vo_k141_20932          | [full]    | 2867   | No  | NA    | 0  | 0              | Low-quality     | Genome-fragment | NA              | 2.87  |
| S16_vo_84821              | [full]    | 4250   | No  | NA    | 0  | 0              | Not-determined  | Genome-fragment | NA              | 0     |
| S16_vo_85128              | [full]    | 3201   | No  | NA    | 0  | 5              | Not-determined  | Genome-fragment | NA              | 0     |
| S14_vo_k141_81436         | [full]    | 2867   | No  | NA    | 0  | 0              | Low-quality     | Genome-fragment | NA              | 5.26  |
| S7_vo_114050              | [full]    | 2867   | No  | NA    | 0  | 0              | Low-quality     | Genome-fragment | NA              | 6.06  |
| S8_extracted_k141_90555   |           | 2867   | No  | NA    | 0  | 2              | Low-quality     | Genome-fragment | NA              | 0.79  |
| S11_vo_k141_79235         | [full]    | 2869   | No  | NA    | 2  | 0              | Low-quality     | Genome-fragment | NA              | 5.13  |
| S16_vo_85529              | [full]    | 11675  | No  | NA    | 0  | 4              | Not-determined  | Genome-fragment | NA              | 0     |
| S16_vo_85652              | [full]    | 5687   | No  | NA    | 0  | 4              | Not-determined  | Genome-fragment | NA              | 0     |
| S16_vo_85844              | [full]    | 2717   | No  | NA    | 0  | 3              | Not-determined  | Genome-fragment | NA              | 0     |
| S5_vo_k141_11289          | [full]    | 2869   | No  | NA    | 3  | 0              | Low-quality     | Genome-fragment | NA              | 7.2   |
| S16_vo_85882              | [full]    | 1855   | No  | NA    | 0  | 2              | Not-determined  | Genome-fragment | NA              | 0     |
| S16_vo_85966              | [full]    | 4851   | No  | NA    | 0  | 1              | Not-determined  | Genome-fragment | NA              | 0     |
| S16_vo_86034              | [full]    | 1866   | No  | NA    | 0  | 1              | Not-determined  | Genome-fragment | NA              | 0     |
| S16_vo_86039              | [full]    | 2120   | No  | NA    | 0  | 1              | Not-determined  | Genome-fragment | NA              | 0     |
| S7_vo_53966               | [full]    | 2869   | No  | NA    | 2  | 0              | Low-quality     | Genome-fragment | NA              | 4.66  |
| S16_vo_86116              | [full]    | 47323  | No  | NA    | 19 | 0              | High-quality    | High-quality    | Genome-fragment | 98.78 |
| S16_vo_86136              | [full]    | 1974   | No  | NA    | 0  | 0              | Not-determined  | Genome-fragment | NA              | 0     |
| S16_vo_86207              | [full]    | 10277  | No  | NA    | 0  | 8              | Not-determined  | Genome-fragment | NA              | 0     |
| S16_vo_86259              | [full]    | 3551   | No  | NA    | 0  | 3              | Not-determined  | Genome-fragment | NA              | 0     |
| S16_vo_86400              | [full]    | 2915   | No  | NA    | 0  | 5              | Not-determined  | Genome-fragment | NA              | 0     |
| S10_extracted_58741       |           | 2869   | No  | NA    | 1  | 0              | Low-quality     | Genome-fragment | NA              | 1.21  |
| S16_vo_3575               | [full]    | 2869   | No  | NA    | 0  | 3              | Low-quality     | Genome-fragment | NA              | 2.83  |
| S16_vo_86634              | [full]    | 1928   | No  | NA    | 0  | 1              | Not-determined  | Genome-fragment | NA              | 0     |
| S16_vo_86715              | [full]    | 1277   | No  | NA    | 0  | 1              | Not-determined  | Genome-fragment | NA              | 0     |
| S11_vo_k141_26868         | [full]    | 2870   | No  | NA    | 0  | 0              | Low-quality     | Genome-fragment | NA              | 5.79  |
| S17_vo_k141_98155         | [full]    | 2871   | No  | NA    | 0  | 2              | Low-quality     | Genome-fragment | NA              | 0.96  |
| S3_vo_k141_80532          | [full]    | 2871   | No  | NA    | 1  | 0              | Low-quality     | Genome-fragment | NA              | 4.68  |
| S10_vo_35128              | [full]    | 2871   | No  | NA    | 3  | 0              | Low-quality     | Genome-fragment | NA              | 6.73  |
| S16_vo_86955              | [full]    | 4892   |     |       |    |                |                 |                 |                 |       |



|                             |       |     |       |    |    |                |                 |       |       |
|-----------------------------|-------|-----|-------|----|----|----------------|-----------------|-------|-------|
| S8_extracted_k141_148248    | 2877  | No  | NA    | 0  | 1  | Low-quality    | Genome-fragment | 1.8   | 0     |
| S16_vs_89332  full          | 1580  | No  | NA    | 0  | 0  | Not-determined | Genome-fragment | NA    | 0     |
| S16_vs_89346  full          | 3637  | No  | NA    | 0  | 3  | Not-determined | Genome-fragment | NA    | 0     |
| S16_vs_89360  full          | 4185  | No  | NA    | 0  | 2  | Not-determined | Genome-fragment | NA    | 0     |
| S8_extracted_k141_31256     | 2877  | No  | NA    | 2  | 0  | Low-quality    | Genome-fragment | 9.15  | 0     |
| S11_vs_k141_29928  full     | 2878  | No  | NA    | 0  | 0  | Low-quality    | Genome-fragment | 3.39  | 0     |
| S16_vs_89511  full          | 84541 | Yes | 63605 | 21 | 15 | High-quality   | High-quality    | 92.55 | 24.76 |
| S16_vs_90229  full          | 4711  | No  | NA    | 0  | 2  | Not-determined | Genome-fragment | NA    | 0     |
| S16_vs_90314  full          | 1063  | No  | NA    | 0  | 2  | Not-determined | Genome-fragment | NA    | 0     |
| S14_extracted_k141_26393    | 2878  | No  | NA    | 0  | 0  | Low-quality    | Genome-fragment | 3.9   | 0     |
| S5_vs_k141_17696  full      | 2878  | No  | NA    | 0  | 3  | Low-quality    | Genome-fragment | 1.26  | 0     |
| S5_vs_k141_145025  full     | 2879  | No  | NA    | 0  | 0  | Low-quality    | Genome-fragment | 5.43  | 0     |
| S7_vs_35676  full           | 2880  | No  | NA    | 1  | 0  | Low-quality    | Genome-fragment | 6.37  | 0     |
| S12_vs_k141_122154  full    | 2880  | No  | NA    | 2  | 1  | Low-quality    | Genome-fragment | 4.47  | 0     |
| S16_vs_90958  full          | 7331  | No  | NA    | 0  | 6  | Not-determined | Genome-fragment | NA    | 0     |
| S12_vs_k141_78437  full     | 2880  | No  | NA    | 0  | 0  | Low-quality    | Genome-fragment | 5.25  | 0     |
| S16_vs_90962  full          | 2090  | No  | NA    | 0  | 0  | Not-determined | Genome-fragment | NA    | 0     |
| S2_vs_k141_7449  full       | 2880  | No  | NA    | 1  | 0  | Low-quality    | Genome-fragment | 6.37  | 0     |
| S16_vs_91009  full          | 1429  | No  | NA    | 1  | 1  | Not-determined | Genome-fragment | NA    | 0     |
| S17_vs_k141_143453  full    | 2881  | No  | NA    | 0  | 2  | Low-quality    | Genome-fragment | 1.58  | 0     |
| S16_vs_91096  full          | 1853  | No  | NA    | 0  | 1  | Not-determined | Genome-fragment | NA    | 0     |
| S8_extracted_k141_16186     | 2881  | No  | NA    | 2  | 0  | Low-quality    | Genome-fragment | 8.88  | 0     |
| S16_vs_91324  full          | 1417  | No  | NA    | 0  | 0  | Not-determined | Genome-fragment | NA    | 0     |
| S17_vs_k141_17043  full     | 2882  | No  | NA    | 0  | 0  | Low-quality    | Genome-fragment | 7.2   | 0     |
| S13_vs_140998  full         | 2882  | No  | NA    | 0  | 0  | Low-quality    | Genome-fragment | 6.38  | 0     |
| S16_vs_91448  full          | 1689  | No  | NA    | 0  | 1  | Not-determined | Genome-fragment | NA    | 0     |
| S16_vs_91496  full          | 3485  | No  | NA    | 0  | 1  | Not-determined | Genome-fragment | NA    | 0     |
| S16_vs_91534  full          | 6814  | No  | NA    | 0  | 2  | Not-determined | Genome-fragment | NA    | 0     |
| S1_vs_k141_50228  full      | 2882  | No  | NA    | 0  | 0  | Low-quality    | Genome-fragment | 1.86  | 0     |
| S3_vs_k141_29327  full      | 2882  | No  | NA    | 0  | 0  | Low-quality    | Genome-fragment | 6.4   | 0     |
| S16_vs_91795  full          | 2648  | No  | NA    | 0  | 1  | Not-determined | Genome-fragment | NA    | 0     |
| S16_vs_91796  full          | 1230  | No  | NA    | 0  | 0  | Not-determined | Genome-fragment | NA    | 0     |
| S16_vs_91861  full          | 1755  | No  | NA    | 0  | 1  | Not-determined | Genome-fragment | NA    | 0     |
| S16_vs_91932  full          | 2327  | No  | NA    | 0  | 1  | Not-determined | Genome-fragment | NA    | 0     |
| S16_vs_92041  full          | 4217  | No  | NA    | 0  | 0  | Not-determined | Genome-fragment | NA    | 0     |
| S7_vs_106506  full          | 2882  | No  | NA    | 0  | 0  | Low-quality    | Genome-fragment | 6.93  | 0     |
| S16_vs_92150  full          | 29970 | No  | NA    | 16 | 0  | Medium-quality | Genome-fragment | 87.3  | 0     |
| S16_vs_92232  full          | 1403  | No  | NA    | 0  | 1  | Not-determined | Genome-fragment | NA    | 0     |
| S16_vs_92353  full          | 5576  | No  | NA    | 2  | 2  | Not-determined | Genome-fragment | NA    | 0     |
| S6_vs_k141_49257  full      | 2882  | No  | NA    | 1  | 0  | Low-quality    | Genome-fragment | 5.95  | 0     |
| S1_vs_k141_84082  full      | 2883  | No  | NA    | 1  | 0  | Low-quality    | Genome-fragment | 6.39  | 0     |
| S16_vs_92650  full          | 1865  | No  | NA    | 0  | 0  | Not-determined | Genome-fragment | NA    | 0     |
| S16_vs_92870  full          | 1170  | No  | NA    | 0  | 1  | Not-determined | Genome-fragment | NA    | 0     |
| S7_vs_80386  full           | 2883  | Yes | 1575  | 1  | 1  | Low-quality    | Genome-fragment | 4.5   | 45.37 |
| S6_vs_k141_29550  full      | 2883  | Yes | 405   | 1  | 1  | Low-quality    | Genome-fragment | 0.26  | 85.95 |
| S1_vs_k141_54892  full      | 2884  | No  | NA    | 0  | 0  | Low-quality    | Genome-fragment | 8.28  | 0     |
| S1_extracted_k141_38306     | 2884  | No  | NA    | 2  | 0  | Low-quality    | Genome-fragment | 2.92  | 0     |
| S16_vs_93167  full          | 2764  | No  | NA    | 0  | 0  | Not-determined | Genome-fragment | NA    | 0     |
| S16_vs_93206  full          | 2213  | No  | NA    | 0  | 3  | Not-determined | Genome-fragment | NA    | 0     |
| S16_vs_93216  full          | 1233  | No  | NA    | 0  | 1  | Not-determined | Genome-fragment | NA    | 0     |
| S1_vs_k141_15029  full      | 2885  | No  | NA    | 0  | 3  | Low-quality    | Genome-fragment | 5.47  | 0     |
| S5_extracted_k141_102118    | 2885  | No  | NA    | 0  | 0  | Low-quality    | Genome-fragment | 13.11 | 0     |
| S4_vs_VIRSorter_11382-cat_2 | 2885  | No  | NA    | 9  | 0  | Low-quality    | Genome-fragment | 9.49  | 0     |
| S8_extracted_k141_139224    | 2885  | No  | NA    | 0  | 2  | Low-quality    | Genome-fragment | 0.9   | 0     |
| S16_vs_93396  full          | 1867  | No  | NA    | 0  | 1  | Not-determined | Genome-fragment | NA    | 0     |
| S7_vs_93850  full           | 2886  | No  | NA    | 0  | 0  | Low-quality    | Genome-fragment | 1.39  | 0     |
| S16_vs_93484  full          | 1946  | No  | NA    | 0  | 0  | Not-determined | Genome-fragment | NA    | 0     |
| S14_vs_k141_20134  full     | 2887  | No  | NA    | 0  | 0  | Low-quality    | Genome-fragment | 6.55  | 0     |
| S16_vs_93544  full          | 1479  | No  | NA    | 0  | 0  | Not-determined | Genome-fragment | NA    | 0     |
| S16_vs_93776  full          | 1285  | No  | NA    | 0  | 1  | Not-determined | Genome-fragment | NA    | 0     |
| S8_vs_k141_173702  full     | 2887  | No  | NA    | 0  | 3  | Low-quality    | Genome-fragment | 2.05  | 0     |
| S11_extracted_k141_75466    | 2888  | No  | NA    | 0  | 0  | Low-quality    | Genome-fragment | 5.24  | 0     |
| S16_vs_93949  full          | 1184  | No  | NA    | 0  | 2  | Not-determined | Genome-fragment | NA    | 0     |
| S11_vs_k141_96790  full     | 2888  | Yes | 914   | 2  | 2  | Low-quality    | Genome-fragment | 1.82  | 68.35 |
| S16_vs_93995  full          | 1117  | No  | NA    | 0  | 0  | Not-determined | Genome-fragment | NA    | 0     |
| S16_vs_94037  full          | 1357  | No  | NA    | 0  | 0  | Not-determined | Genome-fragment | NA    | 0     |
| S16_vs_94075  full          | 4033  | No  | NA    | 0  | 3  | Not-determined | Genome-fragment | NA    | 0     |
| S1_vs_k141_15416  full      | 2888  | No  | NA    | 0  | 0  | Low-quality    | Genome-fragment | 6.89  | 0     |
| S16_vs_94276  full          | 1429  | No  | NA    | 0  | 1  | Not-determined | Genome-fragment | NA    | 0     |
| S1_vs_k141_156744  t2gene   | 2888  | No  | NA    | 1  | 0  | Low-quality    | Genome-fragment | 8.32  | 0     |
| S5_vs_k141_16091  full      | 2888  | No  | NA    | 2  | 0  | Low-quality    | Genome-fragment | 4.56  | 0     |
| S16_vs_94340  full          | 8311  | No  | NA    | 3  | 1  | Not-determined | Genome-fragment | NA    | 0     |
| S16_vs_94357  full          | 3751  | No  | NA    | 0  | 1  | Not-determined | Genome-fragment | NA    | 0     |
| S15_vs_4664  full           | 2888  | No  | NA    | 0  | 2  | Low-quality    | Genome-fragment | 1.01  | 0     |
| S16_vs_94400  full          | 7615  | No  | NA    | 1  | 5  | Not-determined | Genome-fragment | NA    | 0     |
| S3_vs_k141_95995  full      | 2889  | No  | NA    | 1  | 0  | Low-quality    | Genome-fragment | 5.95  | 0     |
| S16_vs_94531  full          | 1598  | No  | NA    | 0  | 2  | Not-determined | Genome-fragment | NA    | 0     |
| S2_vs_k141_25941  full      | 2889  | No  | NA    | 1  | 0  | Low-quality    | Genome-fragment | 3.68  | 0     |
| S5_vs_k141_38001  full      | 2889  | No  | NA    | 0  | 0  | Low-quality    | Genome-fragment | 6.4   | 0     |
| S2_vs_k141_15307  full      | 2889  | No  | NA    | 0  | 0  | Low-quality    | Genome-fragment | 8.67  | 0     |
| S16_vs_94841  full          | 3021  | No  | NA    | 0  | 1  | Not-determined | Genome-fragment | NA    | 0     |
| S13_vs_102116  full         | 2890  | No  | NA    | 0  | 0  | Low-quality    | Genome-fragment | 7.02  | 0     |
| S16_vs_94948  full          | 1766  | No  | NA    | 0  | 0  | Not-determined | Genome-fragment | NA    | 0     |
| S16_vs_162336  full         | 2890  | No  | NA    | 0  | 1  | Low-quality    | Genome-fragment | 3.97  | 0     |
| S12_vs_k141_39800  full     | 2890  | No  | NA    | 0  | 0  | Low-quality    | Genome-fragment | 6.6   | 0     |
| S12_vs_k141_81569  full     | 2890  | Yes | 1882  | 1  | 1  | Low-quality    | Genome-fragment | 0.67  | 34.88 |
| S5_vs_k141_135027  full     | 2891  | No  | NA    | 5  | 0  | Low-quality    | Genome-fragment | 6.74  | 0     |
| S16_vs_115588  full         | 2891  | No  | NA    | 0  | 0  | Low-quality    | Genome-fragment | 6.96  | 0     |
| S10_vs_68786  t2gene        | 2891  | No  | NA    | 0  | 0  | Low-quality    | Genome-fragment | 7.5   | 0     |
| S16_vs_95272  full          | 1330  | No  | NA    | 0  | 1  | Not-determined | Genome-fragment | NA    | 0     |
| S16_vs_95309  full          | 2198  | No  | NA    | 0  | 2  | Not-determined | Genome-fragment | NA    | 0     |
| S8_vs_k141_167080  full     | 2891  | No  | NA    | 0  | 0  | Low-quality    | Genome-fragment | 7.25  | 0     |
| S16_vs_95582  full          | 1985  | No  | NA    | 0  | 1  | Not-determined | Genome-fragment | NA    | 0     |
| S14_extracted_k141_75015    | 2892  | No  | NA    | 7  | 0  | Low-quality    | Genome-fragment | 9.5   | 0     |
| S16_vs_95742  full          | 3142  | No  | NA    | 0  | 1  | Not-determined | Genome-fragment | NA    | 0     |
| S1_vs_k141_69299  full      | 2892  | Yes | 1517  | 1  | 1  | Low-quality    | Genome-fragment | 0.4   | 47.54 |
| S7_vs_125219  full          | 2892  | No  | NA    | 0  | 0  | Low-quality    | Genome-fragment | 5.14  | 0     |
| S10_vs_107823  full         | 2892  | No  | NA    | 0  | 0  | Low-quality    | Genome-fragment | 8.46  | 0     |
| S16_vs_95854  full          | 3325  | No  | NA    | 0  | 1  | Not-determined | Genome-fragment | NA    | 0     |
| S16_vs_k141_166321  full    | 2892  | No  | NA    | 3  | 0  | Low-quality    | Genome-fragment | 1.74  | 0     |
| S17_extracted_k141_81389    | 2893  | No  | NA    | 5  | 0  | Low-quality    | Genome-fragment | 9.54  | 0     |
| S16_vs_95909  full          | 4278  | No  | NA    | 2  | 2  | Not-determined | Genome-fragment | NA    | 0     |
| S16_vs_95910  full          | 5472  | No  | NA    | 0  | 1  | Not-determined | Genome-fragment | NA    | 0     |
| S16_vs_95915  full          | 1509  | No  | NA    | 0  | 1  | Not-determined | Genome-fragment | NA    | 0     |
| S13_vs_150515  t2gene       | 2893  | No  | NA    | 0  | 0  | Low-quality    | Genome-fragment | 5.47  | 0     |
| S16_vs_95937  full          | 2038  | No  | NA    | 0  | 1  | Not-determined | Genome-fragment | NA    | 0     |
| S16_vs_96050  full          | 2361  | No  | NA    | 0  | 0  | Not-determined | Genome-fragment | NA    | 0     |
| S16_vs_96051  full          | 1080  | No  | NA    | 0  | 0  | Not-determined | Genome-fragment | NA    | 0     |
| S16_vs_96071  full          | 4381  | No  | NA    | 0  | 3  | Not-determined | Genome-fragment | NA    | 0     |
| S16_vs_96124  full          | 1442  | No  | NA    | 0  | 0  | Not-determined | Genome-fragment | NA    | 0     |
| S16_vs_96263  full          | 8824  | No  | NA    | 0  | 5  | Not-determined | Genome-fragment | NA    | 1.96  |
| S3_extracted_k141_50859     | 2893  | No  | NA    | 0  | 0  | Low-quality    | Genome-fragment | 1.96  | 0     |
| S16_vs_96278  full          | 2921  | No  | NA    | 0  | 0  | Not-determined | Genome-fragment | NA    | 0     |
| S16_vs_96340  full          | 3317  | No  | NA    | 0  | 3  | Not-determined | Genome-fragment | NA    | 0     |
| S16_vs_96400  full          | 2682  | No  | NA    | 2  | 2  | Not-determined | Genome-fragment | NA    | 0     |
| S4_extracted_4023           | 2893  | No  | NA    | 4  | 0  | Low-quality    | Genome-fragment | 9.53  | 0     |
| S16_vs_96584  full          | 3707  | No  | NA    | 0  | 2  | Not-determined | Genome-fragment | NA    | 0     |
| S16_vs_96607  full          | 1265  | No  | NA    | 0  | 0  | Not-determined | Genome-fragment | NA    | 0     |
| S16_vs_96671  full          | 4359  | No  | NA    | 0  | 6  | Not-determined | Genome-fragment | NA    | 0     |
| S16_vs_96822  full          | 8380  | No  | NA    | 0  | 4  | Not-determined | Genome-fragment | NA    | 0     |
| S7_vs_67226  full           | 2894  | No  | NA    | 0  | 2  | Low-quality    | Genome-fragment | 2.01  | 0     |
| S16_vs_96871  full          | 3542  | No  | NA    | 0  | 7  | Not-determined | Genome-fragment | NA    | 0     |
| S16_vs_97121  full          | 1045  | No  | NA    | 0  | 2  | Not-determined | Genome-fragment | NA    | 0     |
| S3_vs_k141_50871  full      | 2895  | No  | NA    | 2  | 0  | Low-quality    | Genome-fragment | 2.17  | 0     |
| S14_extracted_k141_1955     | 2896  | No  | NA    | 0  | 0  | Low-quality    | Genome-fragment | 4.96  | 0     |
| S16_vs_97312  full          | 1054  | No  | NA    | 0  | 0  | Not-determined | Genome-fragment | NA    | 0     |
| S16_vs_97324  full          | 2637  | No  | NA    | 0  | 4  | Not-determined | Genome-fragment | NA    | 0     |
| S16_vs_97409  full          | 3141  | No  | NA    | 0  | 1  | Not-determined | Genome-fragment | NA    | 0     |
| S1_extracted_k141_16062     | 2896  | No  | NA    | 2  | 0  | Low-quality    | Genome-fragment | 6.5   | 0     |
| S1_vs_k141_59036  full      | 2896  | No  | NA    | 1  | 0  | Low-quality    | Genome-fragment | 2.91  | 0     |
| S5_vs_k141_24271  full      | 2896  | No  | NA    | 3  | 0  | Low-quality    | Genome-fragment | 6.16  | 0     |
| S12_vs_k141_149384  full    | 2896  | No  | NA    | 1  | 0  | Low-quality    | Genome-fragment | 6.43  | 0     |
| S8_vs_k141_193476  full     | 2896  | No  | NA    | 2  | 0  | Low-quality    | Genome-fragment | 7.02  | 0     |
| S9_vs_k141_61145  full      | 2897  | No  | NA    | 0  | 0  | Low-quality    | Genome-fragment | 7.29  | 0     |
| S11_vs_k141_34720  full     | 2898  | No  | NA    | 1  | 0  | Low-quality    | Genome-fragment | 6.08  | 0     |
| S14_vs_k141_78588  full     | 2898  | No  | NA    | 1  | 0  | Low-quality    | Genome-fragment | 22.82 | 0     |
| S16_vs_94379  full          | 2898  | No  | NA    | 0  | 0  | Low-quality    | Genome-fragment | 5.8   | 0     |
| S16_vs_116900  full         | 2899  | No  | NA    | 0  | 0  | Low-quality    | Genome-fragment | 5.76  | 0     |
| S16_vs_161955  full         | 2899  | No  | NA    | 0  | 1  | Low-quality    | Genome-fragment | 3.38  | 0     |
| S16_vs_98174  full          | 2923  | No  | NA    | 0  | 3  | Not-determined | Genome-fragment | NA    | 0     |
| S8_vs_k141_43584  full      | 2899  | No  | NA    | 0  | 0  | Low-quality    | Genome-fragment | 4.56  | 0     |
| S16_vs_98184  full          | 1661  | No  | NA    | 3  | 2  | Not-determined | Genome-fragment | NA    | 0     |
| S14_vs_k141_72600  t2gene   | 2900  | No  | NA    | 1  | 0  | Low-quality    | Genome-fragment | 5.7   | 0     |
| S16_vs_k141_23932  t2gene   | 2900  | No  | NA    | 1  | 0  | Low-quality    | Genome-fragment | 6.88  | 0     |
| S10_vs_105117  full         | 2900  | No  | NA    | 0  | 1  | Low-quality    | Genome-fragment | 6.61  | 0     |
| S13_vs_36291  full          | 2901  | No  | NA    | 0  | 2  | Low-quality    | Genome-fragment | 2.3   |       |



|                           |       |     |       |    |                |                 |                 |       |      |
|---------------------------|-------|-----|-------|----|----------------|-----------------|-----------------|-------|------|
| S16_extracted_142498      | 2902  | No  | NA    | 0  | 1              | Low-quality     | Genome-fragment | 3.61  | 0    |
| S16_vo_100935  full       | 6194  | No  | NA    | 0  | 3              | Not-determined  | Genome-fragment | NA    | 0    |
| S16_vo_100947  full       | 1307  | No  | NA    | 0  | 0              | Not-determined  | Genome-fragment | NA    | 0    |
| S1_vo_k141_104839  full   | 2903  | No  | NA    | 4  | 0              | Low-quality     | Genome-fragment | 5.94  | 0    |
| S16_vo_101028  full       | 5017  | No  | NA    | 0  | 1              | Not-determined  | Genome-fragment | NA    | 0    |
| S8_extracted_k141_161544  | 2903  | No  | NA    | 1  | 0              | Low-quality     | Genome-fragment | 2.5   | 0    |
| S8_vo_k141_12316  full    | 2903  | No  | NA    | 0  | 0              | Low-quality     | Genome-fragment | 2.83  | 0    |
| S16_vo_101037  full       | 5036  | No  | NA    | 0  | 3              | Not-determined  | Genome-fragment | NA    | 0    |
| S16_vo_101072  full       | 31451 | Yes | 20004 | 14 | 5              | Medium-quality  | Genome-fragment | 50.63 | 36.4 |
| S16_vo_101188  full       | 2578  | No  | NA    | 0  | 0              | Not-determined  | Genome-fragment | NA    | 0    |
| S9_vo_k141_11792  full    | 2904  | No  | NA    | 3  | 0              | Low-quality     | Genome-fragment | 5.32  | 0    |
| S12_vo_k141_130770  full  | 2904  | No  | NA    | 0  | 2              | Low-quality     | Genome-fragment | 1.46  | 0    |
| S16_vo_101300  full       | 2283  | No  | NA    | 0  | 0              | Not-determined  | Genome-fragment | NA    | 0    |
| S6_vo_k141_22957  full    | 2904  | No  | NA    | 0  | 0              | Low-quality     | Genome-fragment | 4.78  | 0    |
| S17_extracted_k141_76718  | 2905  | No  | NA    | 1  | 0              | Low-quality     | Genome-fragment | 6.8   | 0    |
| S11_vo_k141_49200  full   | 2905  | No  | NA    | 0  | 0              | Low-quality     | Genome-fragment | 4.5   | 0    |
| S16_vo_101494  full       | 2476  | No  | NA    | 0  | 2              | Not-determined  | Genome-fragment | NA    | 0    |
| S16_vo_101542  full       | 2060  | No  | NA    | 0  | 0              | Not-determined  | Genome-fragment | NA    | 0    |
| S12_vo_102644  full       | 2905  | No  | NA    | 0  | 2              | Low-quality     | Genome-fragment | 1.43  | 0    |
| S16_vo_101614  full       | 1494  | No  | NA    | 0  | 0              | Not-determined  | Genome-fragment | NA    | 0    |
| S16_vo_101671  full       | 3287  | No  | NA    | 4  | 1              | Medium-quality  | Genome-fragment | 68.8  | 0    |
| S10_vo_104650  full       | 2905  | No  | NA    | 1  | 0              | Low-quality     | Genome-fragment | 1.65  | 0    |
| S16_vo_101799  full       | 1481  | No  | NA    | 0  | 2              | Not-determined  | Genome-fragment | NA    | 0    |
| S17_vo_k141_168359  full  | 2906  | No  | NA    | 0  | 1              | Low-quality     | Genome-fragment | 7.98  | 0    |
| S16_vo_102052  full       | 2889  | No  | NA    | 0  | 1              | Not-determined  | Genome-fragment | NA    | 0    |
| S7_vo_16841  full         | 2906  | No  | NA    | 2  | 0              | Low-quality     | Genome-fragment | 5.51  | 0    |
| S8_vo_k141_142480  full   | 2906  | No  | NA    | 1  | 0              | Low-quality     | Genome-fragment | 5.5   | 0    |
| S16_vo_102474  full       | 5148  | No  | NA    | 0  | 1              | Not-determined  | Genome-fragment | NA    | 0    |
| S16_vo_102506  full       | 1243  | No  | NA    | 0  | 2              | Not-determined  | Genome-fragment | NA    | 0    |
| S12_vo_k141_159680  full  | 2907  | No  | NA    | 2  | 1              | Low-quality     | Genome-fragment | 6.13  | 0    |
| S7_vo_103845  full        | 2908  | No  | NA    | 0  | 3              | Low-quality     | Genome-fragment | 2.27  | 0    |
| S14_extracted_k141_97764  | 2909  | No  | NA    | 1  | 0              | Low-quality     | Genome-fragment | 8.45  | 0    |
| S3_extracted_k141_54035   | 2909  | No  | NA    | 2  | 0              | Low-quality     | Genome-fragment | 7.62  | 0    |
| S3_vo_k141_124074  full   | 2909  | No  | NA    | 0  | 0              | Low-quality     | Genome-fragment | 1.05  | 0    |
| S7_extracted_92513        | 2909  | No  | NA    | 0  | 1              | Low-quality     | Genome-fragment | 5.3   | 0    |
| S16_vo_103258  full       | 2661  | No  | NA    | 1  | Not-determined | Genome-fragment | NA              | 0     |      |
| S16_vo_103295  full       | 4758  | No  | NA    | 0  | 3              | Not-determined  | Genome-fragment | NA    | 0    |
| S16_vo_103315  full       | 2661  | No  | NA    | 0  | 0              | Not-determined  | Genome-fragment | NA    | 0    |
| S16_vo_103404  full       | 1604  | No  | NA    | 0  | 0              | Not-determined  | Genome-fragment | NA    | 0    |
| S16_vo_103477  full       | 1009  | No  | NA    | 0  | 2              | Not-determined  | Genome-fragment | NA    | 0    |
| S15_vo_14386  full        | 2909  | No  | NA    | 1  | 0              | Low-quality     | Genome-fragment | 2.1   | 0    |
| S16_vo_103663  full       | 2021  | No  | NA    | 0  | 1              | Not-determined  | Genome-fragment | NA    | 0    |
| S16_vo_103726  full       | 39933 | No  | NA    | 20 | 0              | High-quality    | High-quality    | 99.89 | 0    |
| S6_vo_k141_13287  full    | 2911  | No  | NA    | 1  | 0              | Low-quality     | Genome-fragment | 8.4   | 0    |
| S9_vo_k141_7300  full     | 2912  | No  | NA    | 0  | 1              | Low-quality     | Genome-fragment | 4.86  | 0    |
| S16_vo_103900  full       | 3306  | No  | NA    | 0  | 4              | Not-determined  | Genome-fragment | NA    | 0    |
| S14_vo_k141_73974  full   | 2912  | No  | NA    | 1  | 0              | Low-quality     | Genome-fragment | 9.96  | 0    |
| S12_vo_k141_176580  full  | 2912  | No  | NA    | 0  | 1              | Low-quality     | Genome-fragment | 1.54  | 0    |
| S1_vo_k141_67859  full    | 2913  | No  | NA    | 1  | 0              | Low-quality     | Genome-fragment | 1.91  | 0    |
| S16_vo_114187  full       | 2913  | No  | NA    | 0  | 3              | Low-quality     | Genome-fragment | 0.89  | 0    |
| S16_vo_104693  full       | 1712  | No  | NA    | 0  | 0              | Not-determined  | Genome-fragment | NA    | 0    |
| S16_vo_104811  full       | 6765  | No  | NA    | 0  | 0              | Not-determined  | Genome-fragment | NA    | 0    |
| S11_vo_k141_48262  full   | 2914  | No  | NA    | 1  | 0              | Low-quality     | Genome-fragment | 6.73  | 0    |
| S11_vo_k141_29746  full   | 2914  | No  | NA    | 0  | 0              | Low-quality     | Genome-fragment | 7.08  | 0    |
| S16_vo_105064  full       | 5094  | No  | NA    | 0  | 0              | Not-determined  | Genome-fragment | NA    | 0    |
| S16_vo_105065  full       | 1177  | No  | NA    | 0  | 0              | Not-determined  | Genome-fragment | NA    | 0    |
| S16_vo_105082  full       | 1318  | No  | NA    | 0  | 0              | Not-determined  | Genome-fragment | NA    | 0    |
| S16_vo_105277  full       | 1158  | No  | NA    | 0  | 1              | Not-determined  | Genome-fragment | NA    | 0    |
| S16_vo_105256  full       | 1748  | No  | NA    | 0  | 0              | Not-determined  | Genome-fragment | NA    | 0    |
| S16_vo_105314  full       | 1190  | No  | NA    | 0  | 1              | Not-determined  | Genome-fragment | NA    | 0    |
| S14_vo_k141_38464  full   | 2914  | No  | NA    | 2  | 0              | Low-quality     | Genome-fragment | 6.88  | 0    |
| S16_vo_105588  full       | 2373  | No  | NA    | 0  | 1              | Not-determined  | Genome-fragment | NA    | 0    |
| S16_vo_105639  full       | 1469  | No  | NA    | 0  | 0              | Not-determined  | Genome-fragment | NA    | 0    |
| S16_vo_105672  full       | 1510  | No  | NA    | 0  | 1              | Not-determined  | Genome-fragment | NA    | 0    |
| S16_vo_105705  full       | 1335  | No  | NA    | 0  | 1              | Not-determined  | Genome-fragment | NA    | 0    |
| S8_vo_k141_101276  full   | 2914  | No  | NA    | 0  | 0              | Low-quality     | Genome-fragment | 8.86  | 0    |
| S3_vo_k141_5480  full     | 2915  | No  | NA    | 0  | 2              | Low-quality     | Genome-fragment | 1.27  | 0    |
| S16_vo_134105  full       | 2915  | No  | NA    | 0  | 3              | Low-quality     | Genome-fragment | 2.25  | 0    |
| S12_vo_k141_140546  full  | 2915  | No  | NA    | 0  | 0              | Low-quality     | Genome-fragment | 5.27  | 0    |
| S16_vo_106028  full       | 2229  | No  | NA    | 0  | 1              | Not-determined  | Genome-fragment | NA    | 0    |
| S14_vo_k141_47931  full   | 2916  | No  | NA    | 0  | 0              | Low-quality     | Genome-fragment | 3.11  | 0    |
| S16_vo_106158  full       | 1003  | No  | NA    | 0  | 0              | Not-determined  | Genome-fragment | NA    | 0    |
| S16_vo_106366  full       | 1546  | No  | NA    | 0  | 1              | Not-determined  | Genome-fragment | NA    | 0    |
| S1_vo_k141_85054  full    | 2916  | No  | NA    | 0  | 0              | Low-quality     | Genome-fragment | 5.42  | 0    |
| S16_vo_106388  full       | 1474  | No  | NA    | 0  | 2              | Not-determined  | Genome-fragment | NA    | 0    |
| S16_vo_106394  full       | 3631  | No  | NA    | 0  | 1              | Not-determined  | Genome-fragment | NA    | 0    |
| S16_vo_106427  full       | 1470  | No  | NA    | 0  | 1              | Not-determined  | Genome-fragment | NA    | 0    |
| S16_vo_106508  full       | 1463  | No  | NA    | 0  | 1              | Not-determined  | Genome-fragment | NA    | 0    |
| S16_vo_106589  full       | 3486  | No  | NA    | 0  | 0              | Not-determined  | Genome-fragment | NA    | 0    |
| S16_vo_106652  full       | 9633  | No  | NA    | 0  | 1              | Not-determined  | Genome-fragment | NA    | 0    |
| S12_extracted_k141_118420 | 2916  | No  | NA    | 0  | 1              | Low-quality     | Genome-fragment | 0.25  | 0    |
| S16_vo_106836  full       | 1174  | No  | NA    | 0  | 0              | Not-determined  | Genome-fragment | NA    | 0    |
| S16_vo_106843  full       | 2971  | No  | NA    | 0  | 1              | Not-determined  | Genome-fragment | NA    | 0    |
| S12_vo_k141_87277  full   | 2916  | No  | NA    | 1  | 0              | Low-quality     | Genome-fragment | 3.65  | 0    |
| S16_vo_106942  full       | 3944  | No  | NA    | 0  | 0              | Not-determined  | Genome-fragment | NA    | 0    |
| S16_vo_107022  full       | 1274  | No  | NA    | 0  | 1              | Not-determined  | Genome-fragment | NA    | 0    |
| S16_vo_107035  full       | 1232  | No  | NA    | 0  | 0              | Not-determined  | Genome-fragment | NA    | 0    |
| S16_vo_107060  full       | 1524  | No  | NA    | 0  | 2              | Not-determined  | Genome-fragment | NA    | 0    |
| S16_vo_107235  full       | 56373 | Yes | 28357 | 18 | 17             | Medium-quality  | Genome-fragment | 80.07 | 45.7 |
| S16_vo_107274  full       | 1060  | No  | NA    | 0  | 1              | Not-determined  | Genome-fragment | NA    | 0    |
| S16_vo_107347  full       | 1199  | No  | NA    | 0  | 1              | Not-determined  | Genome-fragment | NA    | 0    |
| S16_vo_107363  full       | 4967  | No  | NA    | 0  | 1              | Not-determined  | Genome-fragment | NA    | 0    |
| S6_vo_k141_7198  full     | 2916  | No  | NA    | 0  | 2              | Low-quality     | Genome-fragment | 1.74  | 0    |
| S8_vo_k141_9251  full     | 2916  | No  | NA    | 3  | 0              | Low-quality     | Genome-fragment | 6.32  | 0    |
| S16_vo_107628  full       | 5555  | No  | NA    | 0  | 3              | Not-determined  | Genome-fragment | NA    | 0    |
| S16_vo_107684  full       | 1211  | No  | NA    | 0  | 2              | Not-determined  | Genome-fragment | NA    | 0    |
| S16_vo_107771  full       | 2157  | No  | NA    | 0  | 0              | Not-determined  | Genome-fragment | NA    | 0    |
| S16_vo_107790  full       | 8318  | No  | NA    | 0  | 4              | Not-determined  | Genome-fragment | NA    | 0    |
| S8_vo_k141_187803  full   | 2916  | No  | NA    | 0  | 2              | Low-quality     | Genome-fragment | 1.4   | 0    |
| S16_vo_75810  full        | 2917  | No  | NA    | 2  | 0              | Low-quality     | Genome-fragment | 6.94  | 0    |
| S17_vo_k141_139644  full  | 2918  | No  | NA    | 0  | 1              | Low-quality     | Genome-fragment | 2.39  | 0    |
| S16_vo_107979  full       | 1527  | No  | NA    | 0  | 1              | Not-determined  | Genome-fragment | NA    | 0    |
| S16_vo_108009  full       | 2094  | No  | NA    | 0  | 2              | Not-determined  | Genome-fragment | NA    | 0    |
| S11_vo_k141_89100  full   | 2918  | No  | NA    | 1  | 0              | Low-quality     | Genome-fragment | 4.16  | 0    |
| S2_extracted_k141_24915   | 2918  | No  | NA    | 0  | 0              | Low-quality     | Genome-fragment | 7.62  | 0    |
| S17_vo_k141_2837  full    | 2919  | No  | NA    | 1  | 0              | Low-quality     | Genome-fragment | 4.92  | 0    |
| S14_vo_k141_4143  full    | 2919  | No  | NA    | 1  | 0              | Low-quality     | Genome-fragment | 7.65  | 0    |
| S16_vo_108743  full       | 1812  | No  | NA    | 0  | 2              | Not-determined  | Genome-fragment | NA    | 0    |
| S16_vo_108767  full       | 1531  | No  | NA    | 0  | 0              | Not-determined  | Genome-fragment | NA    | 0    |
| S16_vo_108778  full       | 1524  | No  | NA    | 0  | 0              | Not-determined  | Genome-fragment | NA    | 0    |
| S1_vo_k141_142963  full   | 2919  | No  | NA    | 0  | 0              | Low-quality     | Genome-fragment | 4.68  | 0    |
| S16_vo_108828  full       | 5020  | No  | NA    | 0  | 1              | Not-determined  | Genome-fragment | NA    | 0    |
| S16_vo_108949  full       | 2048  | No  | NA    | 0  | 0              | Not-determined  | Genome-fragment | NA    | 0    |
| S16_vo_108983  full       | 4233  | No  | NA    | 0  | 1              | Not-determined  | Genome-fragment | NA    | 0    |
| S16_vo_109093  full       | 1988  | No  | NA    | 0  | 0              | Not-determined  | Genome-fragment | NA    | 0    |
| S16_vo_109161  full       | 3810  | No  | NA    | 0  | 0              | Not-determined  | Genome-fragment | NA    | 0    |
| S16_vo_90347  full        | 2919  | No  | NA    | 1  | 0              | Low-quality     | Genome-fragment | 2.09  | 0    |
| S16_vo_109271  full       | 2128  | No  | NA    | 0  | 1              | Not-determined  | Genome-fragment | NA    | 0    |
| S5_vo_k141_111216  full   | 2920  | No  | NA    | 0  | 0              | Low-quality     | Genome-fragment | 6.32  | 0    |
| S7_vo_113812  full        | 2920  | No  | NA    | 2  | 0              | Low-quality     | Genome-fragment | 4.8   | 0    |
| S16_vo_109465  full       | 5853  | No  | NA    | 0  | 5              | Not-determined  | Genome-fragment | NA    | 0    |
| S12_vo_k141_382951  full  | 2920  | No  | NA    | 0  | 0              | Low-quality     | Genome-fragment | 5.68  | 0    |
| S16_vo_109576  full       | 3088  | No  | NA    | 0  | 2              | Not-determined  | Genome-fragment | NA    | 0    |
| S16_vo_109617  full       | 1251  | No  | NA    | 0  | 1              | Not-determined  | Genome-fragment | NA    | 0    |
| S16_vo_109630  full       | 2148  | No  | NA    | 0  | 1              | Not-determined  | Genome-fragment | NA    | 0    |
| S14_vo_k141_8844  full    | 2921  | No  | NA    | 6  | 0              | Low-quality     | Genome-fragment | 7.28  | 0    |
| S16_vo_109815  full       | 2882  | No  | NA    | 0  | 4              | Not-determined  | Genome-fragment | NA    | 0    |
| S16_vo_109842  full       | 1268  | No  | NA    | 0  | 1              | Not-determined  | Genome-fragment | NA    | 0    |
| S5_vo_k141_48064  full    | 2921  | No  | NA    | 1  | 0              | Low-quality     | Genome-fragment | 1.77  | 0    |
| S7_extracted_5988         | 2921  | No  | NA    | 0  | 2              | Low-quality     | Genome-fragment | 5.13  | 0    |
| S16_vo_109980  full       | 3435  | No  | NA    | 0  | 0              | Not-determined  | Genome-fragment | NA    | 0    |
| S16_vo_110035  full       | 3469  | No  | NA    | 0  | 3              | Not-determined  | Genome-fragment | NA    | 0    |
| S16_vo_110082  full       | 3250  | No  | NA    | 0  | 2              | Not-determined  | Genome-fragment | NA    | 0    |
| S16_vo_113284  full       | 2921  | No  | NA    | 0  | 1              | Low-quality     | Genome-fragment | 5.47  | 0    |
| S16_vo_110136  full       | 7117  | No  | NA    | 0  | 4              | Not-determined  | Genome-fragment | NA    | 0    |
| S9_extracted_k141_26069   | 2922  | No  | NA    | 0  | 0              | Low-quality     | Genome-fragment | 48.85 | 0    |
| S8_vo_k141_135743  full   | 2922  | No  | NA    | 0  | 0              | Low-quality     | Genome-fragment | 7.2   | 0    |
| S13_extracted_149344      | 2923  | No  | NA    | 0  | 1              | Low-quality     | Genome-fragment | 4.94  | 0    |
| S16_vo_110268  full       | 2221  | No  | NA    | 0  | 3              | Not-determined  | Genome-fragment | NA    | 0    |
| S3_vo_k141_98434  full    | 2923  | No  | NA    | 0  | 0              | Low-quality     | Genome-fragment | 2.19  | 0    |
| S15_vo_16553  full        | 2923  | No  | NA    | 1  | 1              | Low-quality     | Genome-fragment | 6.82  | 0    |
| S14_extracted_k141_9149   | 2924  | No  | NA    | 0  | 0              | Low-quality     | Genome-fragment | 1.71  | 0    |
| S14_extracted_k141_21281  | 2924  | No  | NA    | 0  | 0              | Low-quality     | Genome-fragment | 3.22  | 0    |
| S16_vo_110573  full       | 1322  | No  | NA    | 0  | 2              | Not-determined  | Genome-fragment | NA    | 0    |
| S16_vo_110682  full       | 3274  |     |       |    |                |                 |                 |       |      |



|                           |          |       |     |    |      |                |                 |                 |    |       |       |
|---------------------------|----------|-------|-----|----|------|----------------|-----------------|-----------------|----|-------|-------|
| S16_vx_113101             | [full]   | 1798  | No  | NA | 0    | 2              | Not-determined  | Genome-fragment | NA | 6.55  | 0     |
| S11_vx_141_20084          | [full]   | 2929  | No  | NA | 0    | 0              | Low-quality     | Genome-fragment | NA | 0     | 0     |
| S16_vx_113216             | [full]   | 1954  | No  | NA | 0    | 0              | Not-determined  | Genome-fragment | NA | 0     | 0     |
| S16_vx_113249             | [full]   | 1079  | No  | NA | 0    | 0              | Not-determined  | Genome-fragment | NA | 0     | 0     |
| S13_vx_113781             | [full]   | 2929  | No  | NA | 5    | 0              | Low-quality     | Genome-fragment | NA | 7     | 0     |
| S16_vx_113442             | [full]   | 1328  | No  | NA | 0    | 0              | Not-determined  | Genome-fragment | NA | 0     | 0     |
| S16_vx_113462             | [full]   | 1567  | No  | NA | 0    | 0              | Not-determined  | Genome-fragment | NA | 0     | 0     |
| S16_vx_113493             | [full]   | 1753  | No  | NA | 0    | 0              | Not-determined  | Genome-fragment | NA | 0     | 0     |
| S16_vx_113515             | [full]   | 5353  | No  | NA | 0    | 1              | Not-determined  | Genome-fragment | NA | 0     | 0     |
| S14_vx_k141_13072         | [H2gene] | 2929  | No  | NA | 2    | 0              | Low-quality     | Genome-fragment | NA | 4.52  | 0     |
| S7_vx_76222               | [full]   | 2930  | No  | NA | 0    | 3              | Low-quality     | Genome-fragment | NA | 3.01  | 0     |
| S16_vx_113809             | [full]   | 1595  | No  | NA | 0    | 2              | Not-determined  | Genome-fragment | NA | 0     | 0     |
| S4_extracted_641          |          | 2930  | No  | NA | 0    | 3              | Low-quality     | Genome-fragment | NA | 1.91  | 0     |
| S14_vx_k141_21728         | [full]   | 2931  | No  | NA | 3    | 0              | Low-quality     | Genome-fragment | NA | 4.26  | 0     |
| S16_vx_114001             | [full]   | 2090  | No  | NA | 0    | 0              | Not-determined  | Genome-fragment | NA | 0     | 0     |
| S1_vx_k141_159643         | [full]   | 2931  | No  | NA | 0    | 0              | Low-quality     | Genome-fragment | NA | 6.35  | 0     |
| S16_vx_114044             | [full]   | 7164  | No  | NA | 0    | 1              | Not-determined  | Genome-fragment | NA | 0     | 0     |
| S7_vx_39314               | [full]   | 2932  | No  | NA | 2    | 0              | Low-quality     | Genome-fragment | NA | 5.69  | 0     |
| S10_vx_58862              | [full]   | 2932  | No  | NA | 3    | 0              | Low-quality     | Genome-fragment | NA | 7.09  | 0     |
| S16_vx_114192             | [full]   | 2092  | No  | NA | 0    | 0              | Not-determined  | Genome-fragment | NA | 0     | 0     |
| S16_vx_114206             | [full]   | 2774  | No  | NA | 0    | 0              | Not-determined  | Genome-fragment | NA | 0     | 0     |
| S12_vx_1141_163478        | [full]   | 2932  | No  | NA | 0    | 2              | Low-quality     | Genome-fragment | NA | 2.63  | 0     |
| S16_vx_114333             | [full]   | 3449  | No  | NA | 0    | 2              | Not-determined  | Genome-fragment | NA | 0     | 0     |
| S8_vx_k141_47215          | [full]   | 2932  | No  | NA | 0    | 1              | Low-quality     | Genome-fragment | NA | 7.31  | 0     |
| S16_vx_114444             | [full]   | 1076  | No  | NA | 0    | 1              | Not-determined  | Genome-fragment | NA | 0     | 0     |
| S16_vx_114508             | [full]   | 2934  | No  | NA | 0    | 2              | Not-determined  | Genome-fragment | NA | 0     | 0     |
| S3_extracted_k141_53877   |          | 2933  | No  | NA | 4    | 0              | Low-quality     | Genome-fragment | NA | 7.82  | 0     |
| S16_vx_114778             | [full]   | 1200  | No  | NA | 0    | 0              | Not-determined  | Genome-fragment | NA | 0     | 0     |
| S16_vx_114785             | [full]   | 2212  | No  | NA | 0    | 0              | Not-determined  | Genome-fragment | NA | 0     | 0     |
| S16_vx_113702             | [full]   | 2933  | No  | NA | 0    | 2              | Low-quality     | Genome-fragment | NA | 0.83  | 0     |
| S16_vx_114943             | [full]   | 2761  | No  | NA | 0    | 1              | Not-determined  | Genome-fragment | NA | 0     | 0     |
| S16_vx_114983             | [full]   | 1516  | No  | NA | 0    | 1              | Not-determined  | Genome-fragment | NA | 0     | 0     |
| S3_vx_k141_116000         | [full]   | 2934  | No  | NA | 0    | 0              | Low-quality     | Genome-fragment | NA | 5.14  | 0     |
| S16_vx_115068             | [full]   | 3693  | No  | NA | 0    | 2              | Not-determined  | Genome-fragment | NA | 0     | 0     |
| S16_vx_115104             | [full]   | 1429  | No  | NA | 0    | 2              | Not-determined  | Genome-fragment | NA | 0     | 0     |
| S6_vx_k141_1132           | [full]   | 2934  | No  | NA | 0    | 1              | Low-quality     | Genome-fragment | NA | 0.87  | 0     |
| S3_extracted_k141_90295   |          | 2935  | No  | NA | 5    | 0              | Low-quality     | Genome-fragment | NA | 9.68  | 0     |
| S7_vx_123308              | [full]   | 2935  | No  | NA | 0    | 0              | Low-quality     | Genome-fragment | NA | 5.46  | 0     |
| S16_vx_115174             | [full]   | 2038  | No  | NA | 0    | 2              | Not-determined  | Genome-fragment | NA | 0     | 0     |
| S14_vx_k141_103660        | [full]   | 2936  | No  | NA | 0    | 0              | Low-quality     | Genome-fragment | NA | 6.42  | 0     |
| S1_vx_k141_93765          | [full]   | 2936  | No  | NA | 0    | 0              | Low-quality     | Genome-fragment | NA | 6.56  | 0     |
| S16_vx_115478             | [full]   | 2120  | No  | NA | 0    | 2              | Not-determined  | Genome-fragment | NA | 0     | 0     |
| S6_extracted_k141_14693   |          | 2937  | No  | NA | 0    | 4              | Low-quality     | Genome-fragment | NA | 0.93  | 0     |
| S8_extracted_k141_138276  |          | 2938  | No  | NA | 0    | 2              | Low-quality     | Genome-fragment | NA | 1.34  | 0     |
| S16_vx_115609             | [full]   | 1162  | No  | NA | 0    | 1              | Not-determined  | Genome-fragment | NA | 0     | 0     |
| S16_vx_115712             | [full]   | 1619  | No  | NA | 0    | 0              | Not-determined  | Genome-fragment | NA | 0     | 0     |
| S16_vx_115731             | [full]   | 2776  | No  | NA | 0    | 2              | Not-determined  | Genome-fragment | NA | 0     | 0     |
| S16_vx_115743             | [full]   | 5271  | No  | NA | 0    | 2              | Not-determined  | Genome-fragment | NA | 0     | 0     |
| S1_extracted_k141_158926  |          | 2939  | No  | NA | 0    | 0              | Low-quality     | Genome-fragment | NA | 8.62  | 0     |
| S16_vx_115791             | [full]   | 1127  | No  | NA | 0    | 3              | Not-determined  | Genome-fragment | NA | 0     | 0     |
| S16_vx_115795             | [full]   | 4154  | No  | NA | 0    | 0              | Not-determined  | Genome-fragment | NA | 0     | 0     |
| S16_vx_115848             | [full]   | 1570  | No  | NA | 0    | 0              | Not-determined  | Genome-fragment | NA | 0     | 0     |
| S16_vx_115856             | [full]   | 3110  | No  | NA | 0    | 1              | Not-determined  | Genome-fragment | NA | 0     | 0     |
| S8_vx_k141_122001         | [full]   | 2939  | No  | NA | 0    | 0              | Low-quality     | Genome-fragment | NA | 4.99  | 0     |
| S16_vx_116023             | [full]   | 1595  | No  | NA | 0    | 0              | Not-determined  | Genome-fragment | NA | 0     | 0     |
| S6_vx_k141_11602          | [full]   | 2940  | No  | NA | 0    | 1              | Low-quality     | Genome-fragment | NA | 1.41  | 0     |
| S1_extracted_k141_22541   |          | 2941  | No  | NA | 0    | 1              | Low-quality     | Genome-fragment | NA | 2.68  | 0     |
| S14_extracted_k141_74168  |          | 2942  | No  | NA | 5    | 0              | Low-quality     | Genome-fragment | NA | 9.71  | 0     |
| S16_vx_116128             | [full]   | 1304  | No  | NA | 0    | 0              | Not-determined  | Genome-fragment | NA | 0     | 0     |
| S7_vx_101084              | [full]   | 2942  | No  | NA | 0    | 1              | Low-quality     | Genome-fragment | NA | 1.36  | 0     |
| S16_vx_116248             | [full]   | 1251  | No  | NA | 0    | 2              | Not-determined  | Genome-fragment | NA | 0     | 0     |
| S16_vx_116364             | [full]   | 1348  | No  | NA | 0    | 1              | Not-determined  | Genome-fragment | NA | 0     | 0     |
| S16_vx_116393             | [full]   | 4330  | No  | NA | 0    | 2              | Not-determined  | Genome-fragment | NA | 0     | 0     |
| S10_vx_89521              | [full]   | 2942  | No  | NA | 1    | 0              | Low-quality     | Genome-fragment | NA | 6.68  | 0     |
| S16_vx_116468             | [full]   | 1454  | No  | NA | 0    | 1              | Not-determined  | Genome-fragment | NA | 0     | 0     |
| S12_vx_k141_182423        | [full]   | 2942  | No  | NA | 1    | 0              | Low-quality     | Genome-fragment | NA | 1.17  | 0     |
| S17_vx_k141_143133        | [full]   | 2943  | No  | NA | 0    | 4              | Low-quality     | Genome-fragment | NA | 1.12  | 0     |
| S16_vx_116604             | [full]   | 2241  | No  | NA | 0    | 2              | Not-determined  | Genome-fragment | NA | 0     | 0     |
| S14_vx_k141_42068         | [full]   | 2943  | No  | NA | 0    | 1              | Low-quality     | Genome-fragment | NA | 3.55  | 0     |
| S8_vx_k141_187632         | [full]   | 2943  | No  | NA | 0    | 2              | Low-quality     | Genome-fragment | NA | 1.29  | 0     |
| S16_vx_116789             | [full]   | 3267  | No  | NA | 0    | 3              | Not-determined  | Genome-fragment | NA | 0     | 0     |
| S16_vx_116834             | [full]   | 2565  | No  | NA | 0    | 1              | Not-determined  | Genome-fragment | NA | 0     | 0     |
| S5_vx_k141_4153           | [full]   | 2945  | No  | NA | 3    | 0              | Low-quality     | Genome-fragment | NA | 7.24  | 0     |
| S8_extracted_k141_33535   |          | 2945  | No  | NA | 0    | 0              | Low-quality     | Genome-fragment | NA | 3.59  | 0     |
| S14_extracted_k141_98159  |          | 2946  | No  | NA | 1    | 0              | Low-quality     | Genome-fragment | NA | 4.54  | 0     |
| S7_vx_108949              | [full]   | 2946  | No  | NA | 0    | 0              | Low-quality     | Genome-fragment | NA | 9.12  | 0     |
| S16_vx_73012              | [full]   | 2946  | No  | NA | 0    | 2              | Low-quality     | Genome-fragment | NA | 4.55  | 0     |
| S16_vx_116932             | [full]   | 5135  | No  | NA | 0    | 3              | Not-determined  | Genome-fragment | NA | 0     | 0     |
| S16_vx_116936             | [full]   | 2994  | No  | NA | 3    | Not-determined | Genome-fragment | NA              | 0  | 0     |       |
| S16_vx_116956             | [full]   | 33562 | No  | NA | 2    | 4              | Medium-quality  | Genome-fragment | NA | 53.31 | 0     |
| S12_extracted_k141_182128 |          | 2946  | No  | NA | 0    | 1              | Low-quality     | Genome-fragment | NA | 4.88  | 0     |
| S16_vx_117055             | [full]   | 1595  | No  | NA | 0    | 2              | Not-determined  | Genome-fragment | NA | 0     | 0     |
| S16_vx_117074             | [full]   | 2083  | No  | NA | 0    | 2              | Not-determined  | Genome-fragment | NA | 0     | 0     |
| S16_vx_117093             | [full]   | 3764  | No  | NA | 0    | 2              | Not-determined  | Genome-fragment | NA | 0     | 0     |
| S11_extracted_k141_24576  |          | 2948  | No  | NA | 0    | 0              | Low-quality     | Genome-fragment | NA | 6.27  | 0     |
| S5_vx_k141_29438          | [full]   | 2948  | No  | NA | 0    | 0              | Low-quality     | Genome-fragment | NA | 5.63  | 0     |
| S9_vx_k141_70132          | [full]   | 2949  | No  | NA | 1    | 0              | Low-quality     | Genome-fragment | NA | 7.15  | 0     |
| S16_vx_7908               | [full]   | 2949  | No  | NA | 1    | 0              | Low-quality     | Genome-fragment | NA | 5.73  | 0     |
| S12_vx_k141_18008         | [H2gene] | 2949  | No  | NA | 0    | 0              | Low-quality     | Genome-fragment | NA | 5.83  | 0     |
| S16_vx_117379             | [full]   | 4452  | No  | NA | 0    | 2              | Not-determined  | Genome-fragment | NA | 0     | 0     |
| S16_vx_117434             | [full]   | 4231  | No  | NA | 0    | 2              | Not-determined  | Genome-fragment | NA | 0     | 0     |
| S16_vx_117463             | [full]   | 6796  | No  | NA | 0    | 1              | Not-determined  | Genome-fragment | NA | 0     | 0     |
| S16_vx_117568             | [full]   | 2443  | No  | NA | 0    | 0              | Not-determined  | Genome-fragment | NA | 0     | 0     |
| S16_vx_117592             | [full]   | 1470  | No  | NA | 0    | 1              | Not-determined  | Genome-fragment | NA | 0     | 0     |
| S16_vx_117649             | [full]   | 2167  | No  | NA | 0    | 0              | Not-determined  | Genome-fragment | NA | 0     | 0     |
| S16_vx_125437             | [full]   | 2950  | No  | NA | 0    | 0              | Low-quality     | Genome-fragment | NA | 5.58  | 0     |
| S16_vx_142909             | [H2gene] | 2950  | No  | NA | 2    | 0              | Low-quality     | Genome-fragment | NA | 4.84  | 0     |
| S16_vx_117914             | [full]   | 1989  | No  | NA | 0    | 3              | Not-determined  | Genome-fragment | NA | 0     | 0     |
| S16_vx_117939             | [full]   | 1863  | No  | NA | 0    | 2              | Not-determined  | Genome-fragment | NA | 0     | 0     |
| S16_vx_117993             | [full]   | 2687  | No  | NA | 0    | 2              | Not-determined  | Genome-fragment | NA | 0     | 0     |
| S10_extracted_1359        |          | 2950  | Yes | NA | 2    | 1              | Low-quality     | Genome-fragment | NA | 3.6   | 11.15 |
| S16_vx_118029             | [full]   | 17809 | No  | NA | 2621 | 2              | High-quality    | Genome-fragment | NA | 0     | 0     |
| S16_vx_118070             | [full]   | 3333  | No  | NA | 0    | 1              | Not-determined  | Genome-fragment | NA | 0     | 0     |
| S10_extracted_32390       |          | 2950  | No  | NA | 1    | 0              | Low-quality     | Genome-fragment | NA | 7.02  | 0     |
| S5_extracted_k141_118482  |          | 2952  | No  | NA | 0    | 0              | Low-quality     | Genome-fragment | NA | 9.72  | 0     |
| S16_vx_118424             | [full]   | 4074  | No  | NA | 0    | 2              | Not-determined  | Genome-fragment | NA | 0     | 0     |
| S16_extracted_151604      |          | 2952  | No  | NA | 3    | 0              | Low-quality     | Genome-fragment | NA | 7.24  | 0     |
| S16_vx_118550             | [full]   | 2276  | No  | NA | 0    | 0              | Not-determined  | Genome-fragment | NA | 0     | 0     |
| S16_vx_118618             | [full]   | 2161  | No  | NA | 0    | 1              | Not-determined  | Genome-fragment | NA | 0     | 0     |
| S16_vx_118663             | [full]   | 3208  | No  | NA | 0    | 2              | Not-determined  | Genome-fragment | NA | 0     | 0     |
| S16_vx_118669             | [full]   | 1446  | No  | NA | 0    | 1              | Not-determined  | Genome-fragment | NA | 0     | 0     |
| S16_vx_118677             | [full]   | 2449  | No  | NA | 0    | 0              | Not-determined  | Genome-fragment | NA | 0     | 0     |
| S16_vx_118684             | [full]   | 14636 | No  | NA | 0    | 8              | Not-determined  | Genome-fragment | NA | 0     | 0     |
| S16_vx_118811             | [full]   | 1787  | No  | NA | 0    | 1              | Not-determined  | Genome-fragment | NA | 0     | 0     |
| S16_vx_118863             | [full]   | 2232  | No  | NA | 0    | 3              | Not-determined  | Genome-fragment | NA | 0     | 0     |
| S16_vx_119037             | [full]   | 1559  | No  | NA | 0    | 2              | Not-determined  | Genome-fragment | NA | 0     | 0     |
| S12_extracted_k141_157895 |          | 2952  | No  | NA | 1    | 0              | Low-quality     | Genome-fragment | NA | 4.38  | 0     |
| S5_vx_k141_132148         | [full]   | 2953  | No  | NA | 0    | 0              | Low-quality     | Genome-fragment | NA | 7.73  | 0     |
| S10_vx_36748              | [full]   | 2954  | No  | NA | 0    | 1              | Low-quality     | Genome-fragment | NA | 2.33  | 0     |
| S16_vx_119130             | [full]   | 1177  | No  | NA | 0    | 0              | Not-determined  | Genome-fragment | NA | 0     | 0     |
| S16_vx_119152             | [full]   | 2795  | No  | NA | 0    | 1              | Not-determined  | Genome-fragment | NA | 0     | 0     |
| S16_vx_119250             | [full]   | 1256  | No  | NA | 0    | 0              | Not-determined  | Genome-fragment | NA | 0     | 0     |
| S10_vx_76928              | [full]   | 2954  | No  | NA | 0    | 0              | Low-quality     | Genome-fragment | NA | 4.46  | 0     |
| S16_vx_120931             | [full]   | 2171  | No  | NA | 0    | 0              | Not-determined  | Genome-fragment | NA | 0     | 0     |
| S8_extracted_k141_23529   |          | 2954  | No  | NA | 0    | 0              | Low-quality     | Genome-fragment | NA | 5.12  | 0     |
| S3_vx_k141_110097         | [full]   | 2955  | No  | NA | 0    | 2              | Low-quality     | Genome-fragment | NA | 4.59  | 0     |
| S7_vx_78201               | [full]   | 2955  | No  | NA | 0    | 0              | Low-quality     | Genome-fragment | NA | 8.73  | 0     |
| S16_vx_114227             | [full]   | 2955  | No  | NA | 0    | 0              | Low-quality     | Genome-fragment | NA | 6.09  | 0     |
| S9_vx_k141_15145          | [H2gene] | 2956  | No  | NA | 2    | 0              | Low-quality     | Genome-fragment | NA | 3.82  | 0     |
| S16_vx_119747             | [full]   | 5663  | No  | NA | 0    | 3              | Not             |                 |    |       |       |



|                           |        |       |     |    |       |                |                 |                 |              |       |      |
|---------------------------|--------|-------|-----|----|-------|----------------|-----------------|-----------------|--------------|-------|------|
| S16_v1_122458             | full   | 4831  | No  | NA | 0     | 5              | Not-determined  | Genome-fragment | NA           |       | 0    |
| S5_v1_k141_2895           | full   | 2962  | No  | NA | 0     | 2              | Low-quality     | Genome-fragment | NA           | 1.07  | 0    |
| S16_v1_122604             | full   | 5227  | No  | NA | 0     | 4              | Not-determined  | Genome-fragment | NA           |       | 0    |
| S16_v1_122639             | full   | 3206  | No  | NA | 0     | 1              | Not-determined  | Genome-fragment | NA           |       | 0    |
| S16_v1_122762             | full   | 1759  | No  | NA | 0     | 0              | Not-determined  | Genome-fragment | NA           |       | 0    |
| S7_v1_89534               | full   | 2965  | No  | NA | 3     | 0              | Low-quality     | Genome-fragment | NA           | 7.74  | 0    |
| S10_v1_30208              | full   | 2965  | No  | NA | 2     | 0              | Low-quality     | Genome-fragment | NA           | 7.13  | 0    |
| S8_v1_k141_143322         | full   | 2965  | No  | NA | 0     | 2              | Low-quality     | Genome-fragment | NA           | 2.05  | 0    |
| S13_v1_30752              | full   | 2966  | No  | NA | 0     | 0              | Low-quality     | Genome-fragment | NA           | 6.17  | 0    |
| S16_v1_123067             | full   | 2376  | No  | NA | 0     | 1              | Not-determined  | Genome-fragment | NA           |       | 0    |
| S14_v1_k141_5679          | full   | 2966  | No  | NA | 1     | 0              | Low-quality     | Genome-fragment | NA           | 7.14  | 0    |
| S16_v1_123124             | full   | 9092  | No  | NA | 0     | 5              | Not-determined  | Genome-fragment | NA           |       | 0    |
| S16_v1_123117             | full   | 2850  | No  | NA | 0     | 4              | Not-determined  | Genome-fragment | NA           |       | 0    |
| S16_v1_123128             | full   | 1030  | No  | NA | 0     | 0              | Not-determined  | Genome-fragment | NA           |       | 0    |
| S16_v1_123133             | full   | 1454  | No  | NA | 0     | 1              | Not-determined  | Genome-fragment | NA           |       | 0    |
| S16_v1_123183             | full   | 1668  | No  | NA | 0     | 0              | Not-determined  | Genome-fragment | NA           |       | 0    |
| S16_v1_123223             | full   | 3205  | No  | NA | 0     | 2              | Not-determined  | Genome-fragment | NA           |       | 0    |
| S16_v1_123229             | full   | 1701  | No  | NA | 0     | 0              | Not-determined  | Genome-fragment | NA           |       | 0    |
| S16_v1_123231             | full   | 1060  | No  | NA | 0     | 0              | Not-determined  | Genome-fragment | NA           |       | 0    |
| S5_v1_k141_26382          | full   | 2966  | No  | NA | 2     | 0              | Low-quality     | Genome-fragment | NA           | 6.35  | 0    |
| S16_v1_123342             | full   | 1127  | No  | NA | 0     | 2              | Not-determined  | Genome-fragment | NA           |       | 0    |
| S16_v1_123435             | full   | 1523  | No  | NA | 0     | 0              | Not-determined  | Genome-fragment | NA           |       | 0    |
| S16_v1_123439             | full   | 2634  | No  | NA | 0     | 3              | Not-determined  | Genome-fragment | NA           |       | 0    |
| S16_v1_123450             | full   | 3975  | No  | NA | 0     | 3              | Not-determined  | Genome-fragment | NA           |       | 0    |
| S5_v1_k141_84649          | full   | 2966  | No  | NA | 0     | 0              | Low-quality     | Genome-fragment | NA           | 3.88  | 0    |
| S12_extracted_k141_113009 |        | 2966  | No  | NA | 0     | 1              | Low-quality     | Genome-fragment | NA           | 3.04  | 0    |
| S12_v1_k141_140048        | full   | 2966  | No  | NA | 1     | 0              | Low-quality     | Genome-fragment | NA           | 5.12  | 0    |
| S8_v1_k141_201164         | full   | 2966  | No  | NA | 0     | 0              | Low-quality     | Genome-fragment | NA           | 8.52  | 0    |
| S5_v1_k141_74844          | full   | 2967  | No  | NA | 0     | 0              | Low-quality     | Genome-fragment | NA           | 8.34  | 0    |
| S16_extracted_119061      |        | 2967  | No  | NA | 0     | 0              | Low-quality     | Genome-fragment | NA           | 2.79  | 0    |
| S16_v1_123825             | full   | 1251  | No  | NA | 0     | 1              | Not-determined  | Genome-fragment | NA           |       | 0    |
| S16_v1_123983             | full   | 2466  | No  | NA | 0     | 2              | Not-determined  | Genome-fragment | NA           |       | 0    |
| S6_v1_k141_8104           | full   | 2967  | No  | NA | 0     | 2              | Low-quality     | Genome-fragment | NA           | 2.62  | 0    |
| S16_v1_124120             | full   | 2273  | No  | NA | 0     | 2              | Not-determined  | Genome-fragment | NA           |       | 0    |
| S2_v1_k141_45963          | full   | 2968  | No  | NA | 0     | 0              | Low-quality     | Genome-fragment | NA           | 4.44  | 0    |
| S16_v1_124146             | full   | 3217  | No  | NA | 0     | 3              | Not-determined  | Genome-fragment | NA           |       | 0    |
| S2_v1_k141_15140          | full   | 2968  | No  | NA | 0     | 0              | Low-quality     | Genome-fragment | NA           | 6.93  | 0    |
| S16_v1_124355             | full   | 3029  | No  | NA | 0     | 3              | Not-determined  | Genome-fragment | NA           |       | 0    |
| S16_v1_124373             | full   | 2366  | No  | NA | 1     | 1              | Not-determined  | Genome-fragment | NA           |       | 0    |
| S16_v1_124401             | full   | 4409  | No  | NA | 0     | 1              | Not-determined  | Genome-fragment | NA           |       | 0    |
| S16_extracted_62928       |        | 2969  | No  | NA | 0     | 0              | Low-quality     | Genome-fragment | NA           | 3.78  | 0    |
| S16_v1_124511             | full   | 1447  | No  | NA | 0     | 2              | Not-determined  | Genome-fragment | NA           |       | 0    |
| S16_v1_124513             | full   | 3377  | No  | NA | 0     | 3              | Not-determined  | Genome-fragment | NA           |       | 0    |
| S16_v1_124634             | full   | 1238  | No  | NA | 0     | 0              | Not-determined  | Genome-fragment | NA           |       | 0    |
| S16_v1_124681             | full   | 14102 | No  | NA | 0     | 6              | Not-determined  | Genome-fragment | NA           |       | 0    |
| S16_v1_124686             | full   | 1223  | No  | NA | 0     | 2              | Not-determined  | Genome-fragment | NA           |       | 0    |
| S16_v1_124703             | full   | 33417 | No  | NA | 15    | 0              | Medium-quality  | Genome-fragment | NA           | 89.63 | 0    |
| S16_v1_124760             | full   | 4552  | No  | NA | 0     | 7              | Not-determined  | Genome-fragment | NA           |       | 0    |
| S16_v1_124931             | full   | 2969  | No  | NA | 0     | 1              | Low-quality     | Genome-fragment | NA           | 4.59  | 0    |
| S16_v1_124936             | full   | 2848  | No  | NA | 0     | 3              | Not-determined  | Genome-fragment | NA           |       | 0    |
| S16_v1_124951             | full   | 2238  | No  | NA | 0     | 3              | Not-determined  | Genome-fragment | NA           |       | 0    |
| S1_extracted_k141_27105   |        | 2970  | No  | NA | 0     | 0              | Low-quality     | Genome-fragment | NA           | 7.07  | 0    |
| S8_v1_k141_29636          | ht2gms | 2970  | No  | NA | 1     | 0              | Low-quality     | Genome-fragment | NA           | 7.03  | 0    |
| S9_v1_k141_6440           | full   | 2971  | No  | NA | 3     | 0              | Low-quality     | Genome-fragment | NA           | 7.76  | 0    |
| S16_v1_125272             | full   | 1682  | No  | NA | 0     | 0              | Not-determined  | Genome-fragment | NA           | 7.1   | 0    |
| S11_v1_k141_15418         | full   | 2971  | No  | NA | 3     | 0              | Low-quality     | Genome-fragment | NA           | 7.6   | 0    |
| S11_v1_k141_49831         | full   | 2971  | No  | NA | 1     | 0              | Low-quality     | Genome-fragment | NA           | 7.83  | 0    |
| S3_extracted_k141_111028  |        | 2971  | No  | NA | 0     | 0              | Low-quality     | Genome-fragment | NA           | 1.91  | 0    |
| S3_v1_k141_47506          | full   | 2971  | No  | NA | 0     | 0              | Low-quality     | Genome-fragment | NA           | 7.4   | 0    |
| S16_v1_125472             | full   | 6513  | No  | NA | 0     | 3              | Not-determined  | Genome-fragment | NA           |       | 0    |
| S10_v1_1088               | full   | 2972  | No  | NA | 0     | 2              | Low-quality     | Genome-fragment | NA           | 1.67  | 0    |
| S16_v1_125546             | full   | 1467  | No  | NA | 0     | 1              | Not-determined  | Genome-fragment | NA           |       | 0    |
| S16_v1_125620             | full   | 2816  | No  | NA | 0     | 1              | Not-determined  | Genome-fragment | NA           |       | 0    |
| S2_v1_k141_1572           | full   | 2972  | No  | NA | 1     | 0              | Low-quality     | Genome-fragment | NA           | 7.38  | 0    |
| S11_v1_k141_81174         | full   | 2973  | No  | NA | 0     | 0              | Low-quality     | Genome-fragment | NA           | 2.84  | 0    |
| S16_v1_125911             | full   | 1251  | No  | NA | 0     | 0              | Not-determined  | Genome-fragment | NA           |       | 0    |
| S16_v1_125912             | full   | 1282  | No  | NA | 0     | 3              | Not-determined  | Genome-fragment | NA           |       | 0    |
| S14_extracted_k141_9979   |        | 2973  | No  | NA | 0     | 0              | Low-quality     | Genome-fragment | NA           | 1.92  | 0    |
| S16_v1_126149             | full   | 1366  | No  | NA | 0     | 0              | Not-determined  | Genome-fragment | NA           |       | 0    |
| S17_v1_k141_69317         | full   | 2974  | No  | NA | 0     | 2              | Low-quality     | Genome-fragment | NA           | 0.76  | 0    |
| S16_v1_126243             | full   | 1984  | No  | NA | 0     | 3              | Not-determined  | Genome-fragment | NA           |       | 0    |
| S3_v1_k141_112320         | full   | 2974  | No  | NA | 3     | 0              | Low-quality     | Genome-fragment | NA           | 1.14  | 0    |
| S16_v1_126247             | full   | 1369  | No  | NA | 0     | 0              | Not-determined  | Genome-fragment | NA           |       | 0    |
| S5_extracted_k141_83912   |        | 2974  | No  | NA | 2     | 0              | Low-quality     | Genome-fragment | NA           | 5.44  | 0    |
| S16_v1_126368             | full   | 1891  | No  | NA | 0     | 0              | Not-determined  | Genome-fragment | NA           |       | 0    |
| S16_v1_126613             | full   | 3123  | No  | NA | 0     | 1              | Not-determined  | Genome-fragment | NA           |       | 0    |
| S16_v1_126704             | full   | 1135  | No  | NA | 0     | 0              | Not-determined  | Genome-fragment | NA           |       | 0    |
| S7_v1_8996                | full   | 2974  | No  | NA | 0     | 3              | Low-quality     | Genome-fragment | NA           | 1.46  | 0    |
| S10_v1_105202             | full   | 2974  | No  | NA | 0     | 0              | Low-quality     | Genome-fragment | NA           | 8.67  | 0    |
| S16_v1_126965             | full   | 1118  | No  | NA | 0     | 0              | Not-determined  | Genome-fragment | NA           |       | 0    |
| S9_v1_k141_13063          | full   | 2975  | No  | NA | 0     | 1              | Low-quality     | Genome-fragment | NA           | 8.06  | 0    |
| S16_v1_136312             | full   | 2975  | No  | NA | 0     | 2              | Low-quality     | Genome-fragment | NA           | 1.07  | 0    |
| S16_v1_127056             | full   | 15042 | No  | NA | 0     | 1              | Not-determined  | Genome-fragment | NA           |       | 0    |
| S16_v1_127174             | full   | 3108  | No  | NA | 0     | 1              | Not-determined  | Genome-fragment | NA           |       | 0    |
| S16_v1_127357             | full   | 1665  | No  | NA | 0     | 1              | Not-determined  | Genome-fragment | NA           |       | 0    |
| S16_v1_127406             | full   | 1298  | No  | NA | 0     | 1              | Not-determined  | Genome-fragment | NA           |       | 0    |
| S16_v1_127505             | full   | 13847 | No  | NA | 0     | 3              | Not-determined  | Genome-fragment | NA           |       | 0    |
| S10_extracted_30493       |        | 2975  | No  | NA | 0     | 0              | Low-quality     | Genome-fragment | NA           | 4.09  | 0    |
| S16_v1_127541             | full   | 2653  | No  | NA | 0     | 2              | Not-determined  | Genome-fragment | NA           |       | 0    |
| S16_v1_127637             | full   | 4137  | No  | NA | 0     | 4              | Not-determined  | Genome-fragment | NA           |       | 0    |
| S16_v1_127669             | full   | 8194  | Yes | NA | 76460 | 15             | 6               | High-quality    | High-quality | 100   | 6.74 |
| S16_v1_127674             | full   | 4612  | No  | NA | 0     | 0              | Not-determined  | Genome-fragment | NA           |       | 0    |
| S2_extracted_k141_8521    |        | 2975  | No  | NA | 1     | 0              | Low-quality     | Genome-fragment | NA           | 10.94 | 0    |
| S16_v1_127961             | full   | 2976  | No  | NA | 0     | 2              | Low-quality     | Genome-fragment | NA           | 5.49  | 0    |
| S16_v1_173044             | full   | 2977  | No  | NA | 0     | 0              | Low-quality     | Genome-fragment | NA           | 5.09  | 0    |
| S13_extracted_30419       |        | 2978  | No  | NA | 0     | 1              | Low-quality     | Genome-fragment | NA           | 6.88  | 0    |
| S16_v1_127971             | full   | 1966  | No  | NA | 0     | 1              | Not-determined  | Genome-fragment | NA           |       | 0    |
| S16_v1_128031             | full   | 5371  | No  | NA | 0     | 3              | Not-determined  | Genome-fragment | NA           |       | 0    |
| S16_v1_128068             | full   | 7666  | No  | NA | 0     | 4              | Not-determined  | Genome-fragment | NA           |       | 0    |
| S5_v1_k141_37704          | full   | 2978  | No  | NA | 2     | 0              | Low-quality     | Genome-fragment | NA           | 7.39  | 0    |
| S16_v1_128080             | full   | 1875  | No  | NA | 0     | 0              | Not-determined  | Genome-fragment | NA           |       | 0    |
| S16_v1_128129             | full   | 1162  | No  | NA | 0     | 0              | Not-determined  | Genome-fragment | NA           |       | 0    |
| S6_v1_k141_40353          | full   | 2979  | No  | NA | 1     | 0              | Low-quality     | Genome-fragment | NA           | 3.47  | 0    |
| S11_v1_k141_56928         | full   | 2981  | No  | NA | 1     | 0              | Low-quality     | Genome-fragment | NA           | 4.91  | 0    |
| S16_v1_128490             | full   | 1186  | No  | NA | 0     | 2              | Not-determined  | Genome-fragment | NA           |       | 0    |
| S16_v1_128517             | full   | 1084  | No  | NA | 0     | 1              | Not-determined  | Genome-fragment | NA           |       | 0    |
| S16_v1_128563             | full   | 1034  | No  | NA | 0     | 0              | Not-determined  | Genome-fragment | NA           |       | 0    |
| S16_v1_128572             | full   | 1171  | No  | NA | 0     | 0              | Not-determined  | Genome-fragment | NA           |       | 0    |
| S13_v1_124403             | full   | 2981  | No  | NA | 0     | 3              | Low-quality     | Genome-fragment | NA           | 5.84  | 0    |
| S14_v1_k141_47079         | full   | 2981  | No  | NA | 1     | 0              | Low-quality     | Genome-fragment | NA           | 5.59  | 0    |
| S16_v1_128706             | full   | 6527  | No  | NA | 0     | 3              | Not-determined  | Genome-fragment | NA           |       | 0    |
| S16_v1_128813             | full   | 8787  | No  | NA | 0     | 2              | Not-determined  | Genome-fragment | NA           |       | 0    |
| S16_v1_128849             | full   | 1456  | No  | NA | 0     | 0              | Not-determined  | Genome-fragment | NA           |       | 0    |
| S10_v1_13139              | full   | 2981  | No  | NA | 0     | 1              | Low-quality     | Genome-fragment | NA           | 4.95  | 0    |
| S16_v1_129049             | full   | 8242  | No  | NA | 4     | Not-determined | Genome-fragment | NA              |              | 0     |      |
| S1_v1_k141_68966          | full   | 2982  | No  | NA | 2     | 0              | Low-quality     | Genome-fragment | NA           | 3.71  | 0    |
| S16_v1_129249             | full   | 1164  | No  | NA | 0     | 0              | Not-determined  | Genome-fragment | NA           |       | 0    |
| S1_v1_k141_112417         | full   | 2982  | No  | NA | 3     | 0              | Low-quality     | Genome-fragment | NA           | 8.03  | 0    |
| S2_v1_k141_3508           | full   | 2982  | No  | NA | 0     | 0              | Low-quality     | Genome-fragment | NA           | 7.82  | 0    |
| S5_extracted_k141_40050   |        | 2983  | No  | NA | 3     | 0              | Low-quality     | Genome-fragment | NA           | 6.57  | 0    |
| S16_v1_129412             | full   | 1053  | No  | NA | 0     | 1              | Not-determined  | Genome-fragment | NA           |       | 0    |
| S16_v1_129421             | full   | 2023  | No  | NA | 0     | 2              | Not-determined  | Genome-fragment | NA           |       | 0    |
| S5_v1_k141_31009          | full   | 2983  | No  | NA | 0     | 2              | Low-quality     | Genome-fragment | NA           | 2.28  | 0    |
| S16_v1_129485             | full   | 7912  | No  | NA | 0     | 7              | Not-determined  | Genome-fragment | NA           |       | 0    |
| S9_v1_k141_8401           | full   | 2984  | No  | NA | 0     | 0              | Low-quality     | Genome-fragment | NA           | 4.65  | 0    |
| S16_v1_129551             | full   | 2447  | No  | NA | 0     | 1              | Not-determined  | Genome-fragment | NA           |       | 0    |
| S3_v1_k141_86077          | full   | 2984  | No  | NA | 0     | 1              | Low-quality     | Genome-fragment | NA           | 1.85  | 0    |
| S16_v1_129779             | full   | 4677  | No  | NA | 0     | 1              | Not-determined  | Genome-fragment | NA           |       | 0    |
| S10_v1_89468              | full   | 2984  | No  | NA | 0     | 0              | Low-quality     | Genome-fragment | NA           | 4.13  | 0    |
| S16_v1_129890             | full   | 1228  | No  | NA | 0     | 0              | Not-determined  | Genome-fragment | NA           |       | 0    |
| S16_v1_129925             | full   | 1112  | No  | NA | 0     | 0              | Not-determined  | Genome-fragment | NA           |       | 0    |
| S15_extracted_13861</     |        |       |     |    |       |                |                 |                 |              |       |      |



|                           |      |       |     |       |      |    |                |                 |    |       |       |
|---------------------------|------|-------|-----|-------|------|----|----------------|-----------------|----|-------|-------|
| S16_vs_132069             | Full | 2837  | No  | NA    | 0    | 2  | Not-determined | Genome-fragment | NA | 0     | 0     |
| S12_vs_k141_161199        | Full | 2996  | No  | NA    | 1    | 0  | Low-quality    | Genome-fragment | NA | 6.38  | 0     |
| S1_vs_k141_140147         | Full | 2997  | No  | NA    | 3    | 0  | Low-quality    | Genome-fragment | NA | 4.95  | 0     |
| S16_vs_132273             | Full | 1010  | No  | NA    | 0    | 1  | Not-determined | Genome-fragment | NA | 0     | 0     |
| S5_vs_k141_67781          | Full | 2997  | No  | NA    | 1    | 1  | Low-quality    | Genome-fragment | NA | 1.22  | 0     |
| S16_vs_132245             | Full | 5129  | No  | NA    | 0    | 2  | Not-determined | Genome-fragment | NA | 0     | 0     |
| S7_extracted_133131       | Full | 2997  | No  | NA    | 4    | 0  | Low-quality    | Genome-fragment | NA | 6.83  | 0     |
| S16_vs_132412             | Full | 1722  | No  | NA    | 0    | 1  | Not-determined | Genome-fragment | NA | 0     | 0     |
| S17_extracted_k141_63132  | Full | 2998  | No  | NA    | 0    | 0  | Low-quality    | Genome-fragment | NA | 9.54  | 0     |
| S16_vs_132449             | Full | 3883  | No  | NA    | 0    | 2  | Not-determined | Genome-fragment | NA | 0     | 0     |
| S16_vs_132705             | Full | 2919  | No  | NA    | 0    | 1  | Not-determined | Genome-fragment | NA | 0     | 0     |
| S16_vs_132716             | Full | 1804  | No  | NA    | 0    | 1  | Not-determined | Genome-fragment | NA | 0     | 0     |
| S16_vs_132793             | Full | 2382  | No  | NA    | 0    | 0  | Not-determined | Genome-fragment | NA | 0     | 0     |
| S16_vs_132904             | Full | 4609  | No  | NA    | 0    | 3  | Not-determined | Genome-fragment | NA | 0     | 0     |
| S16_vs_132979             | Full | 31106 | Yes | 17760 | 9    | 5  | Medium-quality | Genome-fragment | NA | 51.15 | 42.9  |
| S3_vs_k141_117111         | Full | 2959  | Yes | 1465  | 0    | 1  | Low-quality    | Genome-fragment | NA | 2.47  | 51.15 |
| S4_extracted_10330        | Full | 2999  | No  | NA    | 0    | 5  | Low-quality    | Genome-fragment | NA | 2.04  | 0     |
| S16_vs_133208             | Full | 1956  | No  | NA    | 0    | 0  | Not-determined | Genome-fragment | NA | 0     | 0     |
| S16_vs_133292             | Full | 1968  | No  | NA    | 0    | 1  | Not-determined | Genome-fragment | NA | 0     | 0     |
| S9_vs_k141_66481          | Full | 3000  | No  | NA    | 0    | 4  | Low-quality    | Genome-fragment | NA | 4.63  | 0     |
| S14_vs_k141_133991        | Full | 3000  | No  | NA    | 0    | 1  | Low-quality    | Genome-fragment | NA | 3.09  | 0     |
| S16_vs_133519             | Full | 6276  | No  | NA    | 0    | 1  | Not-determined | Genome-fragment | NA | 0     | 0     |
| S16_vs_133579             | Full | 3724  | No  | NA    | 0    | 3  | Not-determined | Genome-fragment | NA | 0     | 0     |
| S16_vs_133598             | Full | 4084  | No  | NA    | 0    | 2  | Not-determined | Genome-fragment | NA | 0     | 0     |
| S1_extracted_k141_42674   | Full | 3000  | No  | NA    | 0    | 2  | Low-quality    | Genome-fragment | NA | 0.8   | 0     |
| S16_vs_133754             | Full | 7786  | No  | NA    | 0    | 2  | Not-determined | Genome-fragment | NA | 0     | 0     |
| S5_extracted_k141_54757   | Full | 3001  | No  | NA    | 1    | 0  | Low-quality    | Genome-fragment | NA | 6.18  | 0     |
| S16_vs_133929             | Full | 1957  | No  | NA    | 0    | 0  | Not-determined | Genome-fragment | NA | 0     | 0     |
| S16_vs_133934             | Full | 3812  | No  | NA    | 1    | 1  | Not-determined | Genome-fragment | NA | 0     | 0     |
| S7_vs_107862              | Full | 3001  | No  | NA    | 5    | 0  | Low-quality    | Genome-fragment | NA | 4.95  | 0     |
| S10_vs_12619              | Full | 3001  | No  | NA    | 1    | 0  | Low-quality    | Genome-fragment | NA | 8.62  | 0     |
| S14_vs_k141_118091        | Full | 3002  | No  | NA    | 0    | 0  | Low-quality    | Genome-fragment | NA | 4.77  | 0     |
| S12_vs_k141_160671        | Full | 3002  | No  | NA    | 0    | 0  | Low-quality    | Genome-fragment | NA | 1.88  | 0     |
| S9_vs_k141_273961         | Full | 3003  | No  | NA    | 0    | 0  | Low-quality    | Genome-fragment | NA | 3.58  | 0     |
| S16_vs_134141             | Full | 2445  | No  | NA    | 0    | 2  | Not-determined | Genome-fragment | NA | 0     | 0     |
| S7_vs_177841              | Full | 3003  | No  | NA    | 0    | 0  | Low-quality    | Genome-fragment | NA | 7.71  | 0     |
| S16_vs_134374             | Full | 2763  | No  | NA    | 0    | 1  | Not-determined | Genome-fragment | NA | 0     | 0     |
| S16_vs_134421             | Full | 2268  | No  | NA    | 0    | 2  | Not-determined | Genome-fragment | NA | 0     | 0     |
| S10_extracted_9554        | Full | 3003  | No  | NA    | 0    | 0  | Low-quality    | Genome-fragment | NA | 3.81  | 0     |
| S14_vs_k141_33023         | Full | 3004  | No  | NA    | 0    | 3  | Low-quality    | Genome-fragment | NA | 1.78  | 0     |
| S16_vs_134550             | Full | 5407  | No  | NA    | 0    | 3  | Not-determined | Genome-fragment | NA | 0     | 0     |
| S2_vs_k141_73969          | Full | 3004  | No  | NA    | 0    | 0  | Low-quality    | Genome-fragment | NA | 6.41  | 0     |
| S16_extracted_16583       | Full | 3004  | No  | NA    | 0    | 3  | Low-quality    | Genome-fragment | NA | 1.35  | 0     |
| S16_vs_134649             | Full | 1639  | No  | NA    | 0    | 1  | Not-determined | Genome-fragment | NA | 0     | 0     |
| S5_vs_k141_69372          | Full | 3005  | No  | NA    | 1    | 0  | Low-quality    | Genome-fragment | NA | 1.86  | 0     |
| S6_extracted_k141_31880   | Full | 3005  | No  | NA    | 3    | 0  | Low-quality    | Genome-fragment | NA | 9.9   | 0     |
| S8_extracted_k141_143015  | Full | 3005  | No  | NA    | 2    | 0  | Low-quality    | Genome-fragment | NA | 2.4   | 0     |
| S16_vs_134840             | Full | 1897  | No  | NA    | 0    | 1  | Not-determined | Genome-fragment | NA | 0     | 0     |
| S16_vs_134923             | Full | 3255  | No  | NA    | 0    | 0  | Not-determined | Genome-fragment | NA | 0     | 0     |
| S16_vs_134942             | Full | 1133  | No  | NA    | 0    | 1  | Not-determined | Genome-fragment | NA | 0     | 0     |
| S13_extracted_14388       | Full | 3007  | No  | NA    | 0    | 1  | Low-quality    | Genome-fragment | NA | 9.04  | 0     |
| S14_vs_k141_98431         | Full | 2007  | No  | NA    | 0    | 0  | Low-quality    | Genome-fragment | NA | 6.02  | 0     |
| S16_vs_135193             | Full | 1521  | No  | NA    | 1    | 1  | Not-determined | Genome-fragment | NA | 0     | 0     |
| S1_extracted_k141_59430   | Full | 3007  | No  | NA    | 0    | 0  | Low-quality    | Genome-fragment | NA | 10.49 | 0     |
| S14_extracted_k141_16085  | Full | 3008  | No  | NA    | 0    | 1  | Low-quality    | Genome-fragment | NA | 3.8   | 0     |
| S16_vs_135502             | Full | 4442  | No  | NA    | 0    | 1  | Not-determined | Genome-fragment | NA | 0     | 0     |
| S16_vs_135782             | Full | 5746  | No  | NA    | 0    | 0  | Not-determined | Genome-fragment | NA | 0     | 0     |
| S16_vs_135874             | Full | 1720  | No  | NA    | 0    | 2  | Not-determined | Genome-fragment | NA | 0     | 0     |
| S14_vs_k141_714531        | Full | 3008  | No  | NA    | 0    | 0  | Low-quality    | Genome-fragment | NA | 6.6   | 0     |
| S16_vs_55487              | Full | 3008  | No  | NA    | 0    | 3  | Low-quality    | Genome-fragment | NA | 5.11  | 0     |
| S16_vs_136062             | Full | 4392  | No  | NA    | 0    | 2  | Not-determined | Genome-fragment | NA | 0     | 0     |
| S16_vs_136117             | Full | 2312  | No  | NA    | 0    | 1  | Not-determined | Genome-fragment | NA | 0     | 0     |
| S1_extracted_k141_108493  | Full | 3009  | No  | NA    | 0    | 0  | Low-quality    | Genome-fragment | NA | 1.73  | 0     |
| S16_vs_136203             | Full | 5201  | No  | NA    | 0    | 3  | Not-determined | Genome-fragment | NA | 0     | 0     |
| S16_vs_136921             | Full | 3009  | No  | NA    | 1    | 0  | Low-quality    | Genome-fragment | NA | 2.06  | 0     |
| S8_extracted_k141_154577  | Full | 3009  | No  | NA    | 0    | 2  | Low-quality    | Genome-fragment | NA | 4.98  | 0     |
| S16_vs_136333             | Full | 1280  | No  | NA    | 0    | 1  | Not-determined | Genome-fragment | NA | 0     | 0     |
| S8_extracted_k141_68319   | Full | 3009  | No  | NA    | 4    | 0  | Low-quality    | Genome-fragment | NA | 12.73 | 0     |
| S2_vs_k141_97255          | Full | 3010  | No  | NA    | 0    | 0  | Low-quality    | Genome-fragment | NA | 7.2   | 0     |
| S16_vs_136465             | Full | 1798  | No  | NA    | 0    | 1  | Not-determined | Genome-fragment | NA | 0     | 0     |
| S16_vs_136559             | Full | 1004  | No  | NA    | 0    | 1  | Not-determined | Genome-fragment | NA | 0     | 0     |
| S6_extracted_k141_43110   | Full | 3010  | No  | NA    | 0    | 0  | Low-quality    | Genome-fragment | NA | 6.88  | 0     |
| S5_vs_k141_115701         | Full | 3011  | No  | NA    | 0    | 0  | Low-quality    | Genome-fragment | NA | 7.58  | 0     |
| S11_vs_k141_15479         | Full | 3012  | No  | NA    | 5    | 0  | Low-quality    | Genome-fragment | NA | 6.14  | 0     |
| S16_vs_136955             | Full | 40399 | No  | NA    | 2    | 2  | Medium-quality | Genome-fragment | NA | 66.07 | 0     |
| S16_vs_136980             | Full | 4045  | No  | NA    | 0    | 2  | Not-determined | Genome-fragment | NA | 0     | 0     |
| S1_extracted_k141_16415   | Full | 3012  | No  | NA    | 0    | 0  | Low-quality    | Genome-fragment | NA | 6.66  | 0     |
| S8_vs_k141_111021         | Full | 3013  | No  | NA    | 1    | 0  | Low-quality    | Genome-fragment | NA | 4.56  | 0     |
| S16_vs_137222             | Full | 44270 | No  | NA    | 2470 | 0  | High-quality   | Genome-fragment | NA | 94.11 | 0     |
| S1_extracted_k141_20304   | Full | 3014  | No  | NA    | 1    | 0  | Low-quality    | Genome-fragment | NA | 6.59  | 0     |
| S16_vs_137321             | Full | 2058  | No  | NA    | 0    | 2  | Not-determined | Genome-fragment | NA | 0     | 0     |
| S3_extracted_k141_777284  | Full | 3014  | No  | NA    | 0    | 0  | Low-quality    | Genome-fragment | NA | 3.21  | 0     |
| S16_vs_137450             | Full | 5110  | No  | NA    | 0    | 1  | Not-determined | Genome-fragment | NA | 0     | 0     |
| S7_vs_31790               | Full | 3014  | No  | NA    | 1    | 0  | Low-quality    | Genome-fragment | NA | 1.56  | 0     |
| S16_vs_137828             | Full | 2269  | No  | NA    | 0    | 0  | Not-determined | Genome-fragment | NA | 0     | 0     |
| S16_vs_137880             | Full | 2019  | No  | NA    | 0    | 0  | Not-determined | Genome-fragment | NA | 0     | 0     |
| S16_vs_137889             | Full | 2073  | No  | NA    | 0    | 2  | Not-determined | Genome-fragment | NA | 0     | 0     |
| S16_vs_137900             | Full | 21076 | No  | NA    | 0    | 15 | Not-determined | Genome-fragment | NA | 0     | 0     |
| S12_vs_k141_178211        | Full | 3014  | No  | NA    | 0    | 0  | Low-quality    | Genome-fragment | NA | 4.03  | 0     |
| S16_vs_138062             | Full | 2814  | No  | NA    | 0    | 2  | Not-determined | Genome-fragment | NA | 0     | 0     |
| S16_vs_138077             | Full | 2520  | No  | NA    | 0    | 3  | Not-determined | Genome-fragment | NA | 0     | 0     |
| S16_vs_138323             | Full | 284   | No  | NA    | 0    | 2  | Not-determined | Genome-fragment | NA | 0     | 0     |
| S16_vs_138346             | Full | 1750  | No  | NA    | 0    | 1  | Not-determined | Genome-fragment | NA | 0     | 0     |
| S16_vs_138373             | Full | 5695  | No  | NA    | 0    | 3  | Not-determined | Genome-fragment | NA | 0     | 0     |
| S16_vs_138410             | Full | 1550  | No  | NA    | 0    | 1  | Not-determined | Genome-fragment | NA | 0     | 0     |
| S16_vs_138419             | Full | 1187  | No  | NA    | 0    | 2  | Not-determined | Genome-fragment | NA | 0     | 0     |
| S9_vs_k141_90674          | Full | 3015  | No  | NA    | 3    | 0  | Low-quality    | Genome-fragment | NA | 8.71  | 0     |
| S11_extracted_k141_36360  | Full | 3015  | No  | NA    | 2    | 0  | Low-quality    | Genome-fragment | NA | 4.78  | 0     |
| S16_vs_138551             | Full | 1554  | No  | NA    | 0    | 0  | Not-determined | Genome-fragment | NA | 0     | 0     |
| S16_vs_138528             | Full | 3015  | No  | NA    | 2    | 0  | Low-quality    | Genome-fragment | NA | 4.74  | 0     |
| S12_vs_k141_8262          | Full | 3015  | No  | NA    | 1    | 0  | Low-quality    | Genome-fragment | NA | 6.29  | 0     |
| S16_vs_138801             | Full | 2487  | No  | NA    | 0    | 2  | Not-determined | Genome-fragment | NA | 0     | 0     |
| S16_vs_138861             | Full | 3750  | No  | NA    | 0    | 0  | Not-determined | Genome-fragment | NA | 0     | 0     |
| S16_vs_139176             | Full | 4908  | No  | NA    | 0    | 2  | Not-determined | Genome-fragment | NA | 0     | 0     |
| S8_extracted_k141_73289   | Full | 3015  | No  | NA    | 1    | 0  | Low-quality    | Genome-fragment | NA | 1.65  | 0     |
| S16_vs_139242             | Full | 2329  | No  | NA    | 0    | 3  | Not-determined | Genome-fragment | NA | 0     | 0     |
| S16_vs_139321             | Full | 3931  | No  | NA    | 0    | 2  | Not-determined | Genome-fragment | NA | 0     | 0     |
| S16_vs_139375             | Full | 1180  | No  | NA    | 0    | 2  | Not-determined | Genome-fragment | NA | 0     | 0     |
| S17_extracted_k141_147639 | Full | 3016  | No  | NA    | 0    | 0  | Low-quality    | Genome-fragment | NA | 4.88  | 0     |
| S16_vs_139475             | Full | 1358  | No  | NA    | 0    | 0  | Not-determined | Genome-fragment | NA | 0     | 0     |
| S16_vs_139476             | Full | 3607  | No  | NA    | 0    | 3  | Not-determined | Genome-fragment | NA | 0     | 0     |
| S16_vs_139510             | Full | 1714  | No  | NA    | 0    | 0  | Not-determined | Genome-fragment | NA | 0     | 0     |
| S7_extracted_128006       | Full | 3016  | No  | NA    | 0    | 1  | Low-quality    | Genome-fragment | NA | 5.68  | 0     |
| S7_vs_80196               | Full | 3016  | No  | NA    | 3    | 0  | Low-quality    | Genome-fragment | NA | 7.98  | 0     |
| S10_vs_56219              | Full | 3016  | No  | NA    | 0    | 0  | Low-quality    | Genome-fragment | NA | 6.95  | 0     |
| S14_extracted_k141_72017  | Full | 3017  | No  | NA    | 3    | 0  | Low-quality    | Genome-fragment | NA | 7.42  | 0     |
| S1_vs_k141_146659         | Full | 3017  | No  | NA    | 2    | 0  | Low-quality    | Genome-fragment | NA | 7.81  | 0     |
| S16_vs_139922             | Full | 4975  | No  | NA    | 4    | 0  | Not-determined | Genome-fragment | NA | 0     | 0     |
| S16_vs_139442             | Full | 3017  | No  | NA    | 0    | 1  | Low-quality    | Genome-fragment | NA | 1.12  | 0     |
| S8_vs_k141_3713           | Full | 3017  | No  | NA    | 3    | 0  | Low-quality    | Genome-fragment | NA | 8.78  | 0     |
| S16_vs_140027             | Full | 1493  | No  | NA    | 0    | 2  | Not-determined | Genome-fragment | NA | 0     | 0     |
| S16_vs_140116             | Full | 1201  | No  | NA    | 0    | 0  | Not-determined | Genome-fragment | NA | 0     | 0     |
| S16_vs_140119             | Full | 1582  | No  | NA    | 0    | 1  | Not-determined | Genome-fragment | NA | 0     | 0     |
| S16_vs_140128             | Full | 6392  | No  | NA    | 0    | 5  | Not-determined | Genome-fragment | NA | 0     | 0     |
| S7_extracted_126288       | Full | 3018  | No  | NA    | 0    | 0  | Low-quality    | Genome-fragment | NA | 9.32  | 0     |
| S16_vs_83232              | Full | 3018  | No  | NA    | 0    | 1  | Low-quality    | Genome-fragment | NA | 1.52  | 0     |
| S16_vs_140343             | Full | 4473  | No  | NA    | 0    | 3  | Not-determined | Genome-fragment | NA | 0     | 0     |
| S10_extracted_46766       | Full | 3018  | No  | NA    | 0    | 1  | Low-quality    | Genome-fragment | NA | 1.25  | 0     |
| S16_vs_140372             | Full | 2461  | No  | NA    | 0    | 0  | Not-determined | Genome-fragment | NA | 0     | 0     |
| S8_extracted_k141_163460  | Full | 3018  | No  | NA    | 1    | 0  | Low-quality    | Genome-fragment | NA | 16.2  |       |



|                             |       |     |      |   |                |                 |                 |       |       |
|-----------------------------|-------|-----|------|---|----------------|-----------------|-----------------|-------|-------|
| 57_extracted_71490          | 3023  | No  | NA   | 2 | 0              | Low-quality     | Genome-fragment | 4.93  | 0     |
| S16_vs_143361  full         | 1024  | No  | NA   | 1 | 1              | Not-determined  | Genome-fragment | NA    | 0     |
| S16_vs_143446  full         | 7069  | No  | NA   | 0 | 5              | Not-determined  | Genome-fragment | NA    | 0     |
| S16_vs_143482  full         | 1719  | No  | NA   | 0 | 0              | Not-determined  | Genome-fragment | NA    | 0     |
| S16_vs_143518  full         | 2572  | No  | NA   | 0 | 1              | Not-determined  | Genome-fragment | NA    | 0     |
| S16_vs_143585  full         | 3028  | No  | NA   | 1 | 0              | Not-determined  | Genome-fragment | NA    | 0     |
| S16_vs_143641  full         | 4288  | No  | NA   | 0 | 2              | Not-determined  | Genome-fragment | NA    | 0     |
| S10_vs_134939  full         | 3023  | No  | NA   | 3 | 0              | Low-quality     | Genome-fragment | 7.2   | 0     |
| S7_vs_51051  full           | 3024  | No  | NA   | 0 | 0              | Low-quality     | Genome-fragment | 6.74  | 0     |
| S16_vs_143856  full         | 3740  | No  | NA   | 0 | 0              | Not-determined  | Genome-fragment | NA    | 0     |
| S16_vs_143871  full         | 1526  | No  | NA   | 0 | 1              | Not-determined  | Genome-fragment | NA    | 0     |
| S16_vs_143942  full         | 1010  | No  | NA   | 0 | 1              | Not-determined  | Genome-fragment | NA    | 0     |
| S16_vs_143955  full         | 2489  | No  | NA   | 0 | 0              | Not-determined  | Genome-fragment | NA    | 0     |
| S16_vs_143986  full         | 2766  | No  | NA   | 0 | 3              | Not-determined  | Genome-fragment | NA    | 0     |
| S10_extracted_117571        | 3024  | No  | NA   | 2 | 0              | Low-quality     | Genome-fragment | 8.35  | 0     |
| S6_extracted_k141_42993     | 3025  | Yes | 2273 | 1 | 1              | Low-quality     | Genome-fragment | 5.32  | 24.86 |
| S13_vs_137108  full         | 3026  | Yes | 1218 | 1 | 1              | Low-quality     | Genome-fragment | 3.59  | 59.75 |
| S8_extracted_k141_135629    | 3027  | No  | NA   | 0 | 2              | Low-quality     | Genome-fragment | 1.86  | 0     |
| S7_vs_51015  full           | 3028  | No  | NA   | 2 | 0              | Low-quality     | Genome-fragment | 6.25  | 0     |
| S16_extracted_52403         | 3028  | No  | NA   | 0 | 0              | Low-quality     | Genome-fragment | 5.6   | 0     |
| S16_vs_144378  full         | 2203  | No  | NA   | 0 | 0              | Not-determined  | Genome-fragment | NA    | 4.73  |
| S17_extracted_k141_7606     | 3029  | No  | NA   | 0 | 0              | Low-quality     | Genome-fragment | NA    | 0     |
| S16_vs_144392  full         | 1541  | No  | NA   | 0 | 0              | Not-determined  | Genome-fragment | NA    | 0     |
| S17_vs_k141_29541  full     | 3029  | No  | NA   | 1 | 0              | Low-quality     | Genome-fragment | 5.69  | 0     |
| S16_vs_144477  full         | 4558  | No  | NA   | 0 | 2              | Not-determined  | Genome-fragment | NA    | 0     |
| S16_vs_144492  full         | 5118  | No  | NA   | 4 | Not-determined | Genome-fragment | NA              | NA    | 0     |
| S11_vs_k141_68390  full     | 3029  | No  | NA   | 0 | 0              | Low-quality     | Genome-fragment | 4.99  | 0     |
| S16_vs_144539  full         | 5556  | No  | NA   | 0 | 2              | Not-determined  | Genome-fragment | NA    | 0     |
| S12_extracted_k141_95805    | 3029  | No  | NA   | 0 | 0              | Low-quality     | Genome-fragment | 8.87  | 0     |
| S16_vs_144749  full         | 2894  | No  | NA   | 0 | 3              | Not-determined  | Genome-fragment | NA    | 0     |
| S6_vs_k141_15635  full      | 3029  | No  | NA   | 0 | 4              | Low-quality     | Genome-fragment | 2.16  | 0     |
| S7_vs_51258  full           | 3030  | No  | NA   | 1 | 1              | Low-quality     | Genome-fragment | 7.33  | 0     |
| S13_extracted_44422         | 3032  | No  | NA   | 0 | 0              | Low-quality     | Genome-fragment | 0.28  | 0     |
| S16_vs_144847  full         | 2105  | No  | NA   | 0 | 2              | Not-determined  | Genome-fragment | NA    | 0     |
| S11_extracted_k141_76047    | 3032  | No  | NA   | 0 | 0              | Low-quality     | Genome-fragment | 5.26  | 0     |
| S16_vs_144905  full         | 4969  | No  | NA   | 0 | 2              | Not-determined  | Genome-fragment | NA    | 0     |
| S16_vs_144989  full         | 2486  | No  | NA   | 0 | 2              | Not-determined  | Genome-fragment | NA    | 0     |
| S1_vs_k141_25603  full      | 3032  | No  | NA   | 2 | 0              | Low-quality     | Genome-fragment | 7.49  | 0     |
| S16_extracted_29435         | 3032  | No  | NA   | 3 | 1              | Low-quality     | Genome-fragment | 0.52  | 0     |
| S16_extracted_29634         | 3032  | No  | NA   | 0 | 4              | Low-quality     | Genome-fragment | 1.99  | 0     |
| S10_extracted_23735         | 3032  | No  | NA   | 1 | 0              | Low-quality     | Genome-fragment | 1.16  | 0     |
| S11_vs_k141_79129  full     | 3032  | No  | NA   | 0 | 0              | Low-quality     | Genome-fragment | 7.54  | 0     |
| S16_vs_145383  full         | 1143  | No  | NA   | 0 | 1              | Not-determined  | Genome-fragment | NA    | 0     |
| S16_vs_145461  full         | 2516  | No  | NA   | 0 | 1              | Not-determined  | Genome-fragment | NA    | 0     |
| S3_extracted_k141_99580     | 3034  | No  | NA   | 3 | 0              | Low-quality     | Genome-fragment | 4.98  | 0     |
| S7_vs_78830  full           | 3034  | No  | NA   | 0 | 0              | Low-quality     | Genome-fragment | 3.52  | 0     |
| S16_vs_110403  full         | 3034  | No  | NA   | 0 | 3              | Low-quality     | Genome-fragment | 4.37  | 0     |
| S16_vs_145564  full         | 3468  | No  | NA   | 0 | 4              | Not-determined  | Genome-fragment | NA    | 0     |
| S16_vs_145733  full         | 3512  | No  | NA   | 2 | Not-determined | Genome-fragment | NA              | 0     |       |
| S10_extracted_113856        | 3034  | Yes | 772  | 1 | 2              | Low-quality     | Genome-fragment | 0.44  | 74.56 |
| S12_extracted_k141_151539   | 3034  | No  | NA   | 0 | 0              | Low-quality     | Genome-fragment | 2.83  | 0     |
| S16_vs_145793  full         | 1609  | No  | NA   | 2 | Not-determined | Genome-fragment | NA              | 0     |       |
| S16_vs_145796  full         | 1930  | No  | NA   | 0 | 3              | Not-determined  | Genome-fragment | NA    | 0     |
| S16_vs_145819  full         | 12179 | No  | NA   | 0 | 8              | Not-determined  | Genome-fragment | NA    | 0     |
| S16_vs_145907  full         | 2093  | No  | NA   | 0 | 0              | Not-determined  | Genome-fragment | NA    | 0     |
| S2_vs_k141_10380  full      | 3034  | No  | NA   | 0 | 0              | Low-quality     | Genome-fragment | 9.22  | 0     |
| S8_vs_k141_52971  full      | 3034  | No  | NA   | 0 | 0              | Low-quality     | Genome-fragment | 6.06  | 0     |
| S16_vs_146221  full         | 2844  | No  | NA   | 0 | 0              | Not-determined  | Genome-fragment | NA    | 8.02  |
| S9_vs_k141_79380  full      | 3035  | No  | NA   | 0 | 0              | Low-quality     | Genome-fragment | NA    | 0     |
| S16_vs_146267  full         | 10222 | No  | NA   | 0 | 2              | Not-determined  | Genome-fragment | NA    | 0     |
| S11_extracted_k141_60719    | 3035  | No  | NA   | 0 | 0              | Low-quality     | Genome-fragment | 7.29  | 0     |
| S3_vs_k141_88406  full      | 3035  | No  | NA   | 0 | 0              | Low-quality     | Genome-fragment | 1.65  | 0     |
| S16_vs_146454  full         | 2550  | No  | NA   | 0 | 1              | Not-determined  | Genome-fragment | NA    | 0     |
| S8_vs_k141_137090  112zgene | 3035  | No  | NA   | 2 | 0              | Low-quality     | Genome-fragment | 7.95  | 0     |
| S17_vs_k141_97840  full     | 3036  | No  | NA   | 0 | 0              | Not-determined  | Genome-fragment | NA    | 3.43  |
| S14_extracted_k141_96330    | 3036  | No  | NA   | 3 | 0              | Low-quality     | Genome-fragment | 10.01 | 0     |
| S16_vs_146611  full         | 4729  | No  | NA   | 0 | 2              | Not-determined  | Genome-fragment | NA    | 0     |
| S16_vs_146612  full         | 1701  | No  | NA   | 0 | 0              | Not-determined  | Genome-fragment | NA    | 0     |
| S16_vs_146657  full         | 1803  | No  | NA   | 1 | Not-determined | Genome-fragment | NA              | 0     |       |
| S3_vs_k141_121489  full     | 3036  | No  | NA   | 0 | 0              | Low-quality     | Genome-fragment | 5.68  | 0     |
| S16_vs_146873  full         | 6622  | No  | NA   | 0 | 5              | Not-determined  | Genome-fragment | NA    | 0     |
| S16_vs_147023  full         | 1109  | No  | NA   | 0 | 0              | Not-determined  | Genome-fragment | NA    | 0     |
| S16_vs_147213  full         | 2616  | No  | NA   | 0 | 1              | Not-determined  | Genome-fragment | NA    | 0     |
| S16_vs_147366  full         | 1062  | No  | NA   | 0 | 0              | Not-determined  | Genome-fragment | NA    | 0     |
| S16_vs_147388  full         | 1939  | No  | NA   | 0 | 2              | Not-determined  | Genome-fragment | NA    | 0     |
| S16_vs_147492  full         | 7294  | No  | NA   | 0 | 2              | Not-determined  | Genome-fragment | NA    | 0     |
| S16_vs_147503  full         | 1606  | No  | NA   | 0 | 0              | Not-determined  | Genome-fragment | NA    | 0     |
| S16_vs_147603  full         | 4076  | No  | NA   | 0 | 2              | Not-determined  | Genome-fragment | NA    | 0     |
| S7_extracted_55919          | 3036  | No  | NA   | 2 | 1              | Low-quality     | Genome-fragment | 2.79  | 0     |
| S16_vs_147868  full         | 1386  | No  | NA   | 0 | 0              | Not-determined  | Genome-fragment | NA    | 0     |
| S16_vs_147882  full         | 1798  | No  | NA   | 0 | 1              | Not-determined  | Genome-fragment | NA    | 0     |
| S16_vs_147891  full         | 2666  | No  | NA   | 0 | 3              | Not-determined  | Genome-fragment | NA    | 0     |
| S17_extracted_k141_98119    | 3037  | No  | NA   | 5 | 0              | Low-quality     | Genome-fragment | 6.81  | 0     |
| S15_vs_8517  full           | 3037  | No  | NA   | 0 | 0              | Low-quality     | Genome-fragment | 2.01  | 0     |
| S10_vs_120542  full         | 3038  | No  | NA   | 0 | 2              | Low-quality     | Genome-fragment | 8.16  | 0     |
| S16_vs_148537  full         | 2964  | No  | NA   | 0 | 6              | Not-determined  | Genome-fragment | NA    | 0     |
| S12_vs_k141_109432  full    | 3038  | No  | NA   | 3 | 0              | Low-quality     | Genome-fragment | 5.53  | 0     |
| S6_vs_k141_207689  full     | 3038  | No  | NA   | 1 | 0              | Low-quality     | Genome-fragment | 7.31  | 0     |
| S9_vs_k141_6544  full       | 3039  | No  | NA   | 0 | 0              | Low-quality     | Genome-fragment | 5.64  | 0     |
| S16_vs_148792  full         | 3600  | No  | NA   | 0 | 0              | Not-determined  | Genome-fragment | NA    | 0     |
| S16_vs_148886  full         | 1293  | No  | NA   | 0 | 2              | Not-determined  | Genome-fragment | NA    | 0     |
| S16_vs_149059  full         | 5660  | No  | NA   | 3 | Not-determined | Genome-fragment | NA              | 0     |       |
| S16_vs_149070  full         | 11576 | No  | NA   | 0 | 1              | Not-determined  | Genome-fragment | NA    | 0     |
| S8_extracted_k141_20493     | 3039  | No  | NA   | 1 | 0              | Low-quality     | Genome-fragment | 10.84 | 0     |
| S16_vs_149152  full         | 2206  | No  | NA   | 0 | 0              | Not-determined  | Genome-fragment | NA    | 0     |
| S16_vs_149234  full         | 6006  | No  | NA   | 0 | 4              | Not-determined  | Genome-fragment | NA    | 0     |
| S16_vs_149381  full         | 1121  | No  | NA   | 0 | 1              | Not-determined  | Genome-fragment | NA    | 0     |
| S16_vs_149454  full         | 1465  | No  | NA   | 0 | 2              | Not-determined  | Genome-fragment | NA    | 0     |
| S16_vs_149487  full         | 1557  | No  | NA   | 0 | 1              | Not-determined  | Genome-fragment | NA    | 0     |
| S16_vs_149750  full         | 2711  | No  | NA   | 0 | 1              | Not-determined  | Genome-fragment | NA    | 0     |
| S16_vs_149812  full         | 2855  | No  | NA   | 0 | 2              | Not-determined  | Genome-fragment | NA    | 0     |
| S16_vs_150155  full         | 8964  | No  | NA   | 0 | 2              | Not-determined  | Genome-fragment | NA    | 0     |
| S16_vs_150229  full         | 2115  | No  | NA   | 0 | 1              | Not-determined  | Genome-fragment | NA    | 0     |
| S16_vs_150247  full         | 1781  | No  | NA   | 0 | 1              | Not-determined  | Genome-fragment | NA    | 0     |
| S8_extracted_k141_22524     | 3039  | No  | NA   | 0 | 0              | Low-quality     | Genome-fragment | 9.37  | 0     |
| S16_vs_150295  full         | 12958 | No  | NA   | 0 | 1              | Not-determined  | Genome-fragment | NA    | 0     |
| S11_extracted_k141_79488    | 3040  | No  | NA   | 0 | 1              | Low-quality     | Genome-fragment | 2.8   | 0     |
| S5_extracted_k141_37995     | 3040  | No  | NA   | 2 | 0              | Low-quality     | Genome-fragment | 8.56  | 0     |
| S10_extracted_45771         | 3040  | No  | NA   | 1 | 1              | Low-quality     | Genome-fragment | 1.53  | 0     |
| S7_extracted_115093         | 3041  | No  | NA   | 2 | 0              | Low-quality     | Genome-fragment | 5.62  | 0     |
| S10_extracted_40069         | 3041  | No  | NA   | 1 | 0              | Low-quality     | Genome-fragment | 3.02  | 0     |
| S16_vs_150709  full         | 2178  | No  | NA   | 0 | 0              | Not-determined  | Genome-fragment | NA    | 0     |
| S16_vs_150763  full         | 1374  | No  | NA   | 0 | 1              | Not-determined  | Genome-fragment | NA    | 0     |
| S16_vs_150896  full         | 3041  | No  | NA   | 0 | 1              | Low-quality     | Genome-fragment | 5.3   | 0     |
| S12_extracted_k141_167279   | 3041  | No  | NA   | 1 | 1              | Low-quality     | Genome-fragment | 10.41 | 0     |
| S3_extracted_k141_33478     | 3042  | No  | NA   | 0 | 1              | Low-quality     | Genome-fragment | 5.03  | 0     |
| S16_vs_150919  full         | 1304  | No  | NA   | 0 | 0              | Not-determined  | Genome-fragment | NA    | 0     |
| S8_vs_k141_202089  full     | 3042  | No  | NA   | 0 | 2              | Low-quality     | Genome-fragment | 0.69  | 0     |
| S17_vs_k141_155398  full    | 3043  | No  | NA   | 4 | 0              | Low-quality     | Genome-fragment | 4.57  | 0     |
| S16_vs_151028  full         | 2173  | No  | NA   | 0 | 0              | Not-determined  | Genome-fragment | NA    | 0     |
| S1_vs_k141_156258  full     | 3043  | No  | NA   | 0 | 3              | Low-quality     | Genome-fragment | 1.4   | 0     |
| S16_vs_151155  full         | 1458  | No  | NA   | 0 | 0              | Not-determined  | Genome-fragment | NA    | 0     |
| S10_extracted_91179         | 3043  | No  | NA   | 0 | 1              | Low-quality     | Genome-fragment | 7.16  | 0     |
| S17_vs_k141_27147  full     | 3045  | No  | NA   | 0 | 2              | Low-quality     | Genome-fragment | 5.14  | 0     |
| S16_vs_151291  full         | 6304  | No  | NA   | 0 | 5              | Not-determined  | Genome-fragment | NA    | 0     |
| S16_vs_1781  full           | 3045  | No  | NA   | 0 | 1              | Low-quality     | Genome-fragment | 7.12  | 0     |
| S12_extracted_k141_38282    | 3045  | No  | NA   | 0 | 4              | Low-quality     | Genome-fragment | 2.45  | 0     |
| S16_vs_67366  full          | 3046  | No  | NA   | 0 | 0              | Low-quality     | Genome-fragment | 0.99  | 0     |
| S16_vs_151538  full         | 8234  | No  | NA   | 0 | 5              | Not-determined  | Genome-fragment | NA    | 0     |
| S16_vs_151588  full         | 1437  | No  | NA   | 0 | 0              | Not-determined  | Genome-fragment | NA    | 0     |
| S12_vs_k141_82718  full     | 3046  | No  | NA   | 0 | 0              | Low-quality     | Genome-fragment | 3.29  | 0     |
| S16_vs_151638  full         | 1938  | No  | NA   | 0 | 1              | Not-determined  | Genome-fragment | NA    | 0     |
| S4_extracted_24926          | 3046  | No  | NA   | 1 | 0              | Low-quality     | Genome-fragment | 6.77  | 0     |
| S16_vs_151857  full         | 3063  | No  | NA   | 0 | 3              | Not-determined  | Genome-fragment | NA    | 0     |
| S16_vs_152034  full         | 1514  | No  | NA   | 0 | 1              | Not-determined  | Genome-fragment | NA    | 0     |
| S11_extracted_k141_31999    | 3048  | No  | NA   | 3 | 0              | Low-quality     | Genome-fragment | 3.28  | 0     |
| S7_extracted_5770           | 3048  | No  | NA   | 2 | 0              | Low-quality     | Genome-fragment | 9.01  | 0     |
| S16_vs_152323  full         | 2517  | No  | NA   | 0 | 2              | Not-determined  | Genome-fragment | NA    | 10.57 |
| S9_extracted_k141_81271     | 3049  | No  | NA   | 0 | 1              | Low-quality     | Genome-fragment | NA    | 0     |
| S16_vs_152414  full         | 1828  | No  | NA   | 0 | 0              | Not-determined  | Genome-fragment | NA    | 0     |
| S9_extracted_k141_10826     | 3049  | No  | NA   | 6 | 0              | Low-quality     | Genome-fragment | 8.69  | 0     |
| S16_vs_152487  full         | 1581  | No  | NA   | 1 | 0              | Not-determined  | Genome-fragment | NA    | 0     |
| S3_extracted_k141_75088     | 3049  | No  | NA   | 1 | 0              | Low-quality     | Genome-fragment | 6.76  | 0     |
| S3_extracted_k141_46003     | 3049  | No  | NA   | 2 | 0              | Low-quality     | Genome-fragment | 7.16  | 0     |
| S16_extracted_67948         | 3049  | No  | NA   | 2 | 0              | Low-quality     | Genome-fragment | 7.09  | 0     |
| S10_extracted_30328         | 3049  | No  | NA   | 2 | 0              | Low-quality     | Genome-fragment | 5.98  | 0     |
| S16_vs_152728  full         | 3860  | No  | NA   | 0 | 2              |                 |                 |       |       |



|                           |       |     |      |   |   |                |                 |       |       |
|---------------------------|-------|-----|------|---|---|----------------|-----------------|-------|-------|
| S5_extracted_k141_133496  | 3052  | No  | NA   | 0 | 3 | Low-quality    | Genome-fragment | 2.34  | 0     |
| S7_extracted_79358        | 3052  | No  | NA   | 1 | 1 | Low-quality    | Genome-fragment | 7.11  | 0     |
| S7_vs_29425  full         | 3052  | No  | NA   | 0 | 0 | Low-quality    | Genome-fragment | 6.28  | 0     |
| S16_vs_155042  full       | 1380  | No  | NA   | 0 | 1 | Not-determined | Genome-fragment | NA    | 0     |
| S12_extracted_k141_136656 | 3052  | No  | NA   | 0 | 3 | Low-quality    | Genome-fragment | 1.89  | 0     |
| S16_vs_155161  full       | 1096  | No  | NA   | 0 | 2 | Not-determined | Genome-fragment | NA    | 0     |
| S16_vs_155171  full       | 5579  | No  | NA   | 0 | 1 | Not-determined | Genome-fragment | NA    | 0     |
| S16_vs_155178  full       | 1255  | No  | NA   | 0 | 2 | Not-determined | Genome-fragment | NA    | 0     |
| S14_extracted_k141_17936  | 3053  | No  | NA   | 0 | 0 | Low-quality    | Genome-fragment | 3.85  | 0     |
| S3_extracted_k141_97488   | 3053  | No  | NA   | 1 | 3 | Low-quality    | Genome-fragment | 0.95  | 0     |
| S16_extracted_24629       | 3053  | No  | NA   | 0 | 0 | Low-quality    | Genome-fragment | 6.25  | 0     |
| S16_vs_155316  full       | 1334  | No  | NA   | 0 | 0 | Not-determined | Genome-fragment | NA    | 0     |
| S16_vs_155317  full       | 2314  | No  | NA   | 0 | 1 | Not-determined | Genome-fragment | NA    | 0     |
| S3_vs_k141_40239  full    | 3054  | No  | NA   | 0 | 1 | Low-quality    | Genome-fragment | 1.88  | 0     |
| S16_vs_155426  full       | 2357  | No  | NA   | 0 | 0 | Not-determined | Genome-fragment | NA    | 0     |
| S16_vs_155485  full       | 1452  | No  | NA   | 0 | 2 | Not-determined | Genome-fragment | NA    | 0     |
| S16_vs_155505  full       | 9656  | No  | NA   | 0 | 1 | Not-determined | Genome-fragment | NA    | 0     |
| S16_vs_155547  full       | 1331  | No  | NA   | 0 | 0 | Not-determined | Genome-fragment | NA    | 0     |
| S16_vs_155810  full       | 2879  | No  | NA   | 0 | 1 | Not-determined | Genome-fragment | NA    | 0     |
| S16_vs_92104  full        | 3054  | No  | NA   | 0 | 0 | Low-quality    | Genome-fragment | 1.93  | 0     |
| S7_vs_34529  full         | 3055  | No  | NA   | 0 | 2 | Low-quality    | Genome-fragment | 5.47  | 0     |
| S16_vs_155955  full       | 2935  | No  | NA   | 0 | 3 | Not-determined | Genome-fragment | NA    | 0     |
| S16_extracted_92978       | 3055  | No  | NA   | 0 | 1 | Low-quality    | Genome-fragment | 2.46  | 0     |
| S10_extracted_18055       | 3057  | No  | NA   | 0 | 2 | Low-quality    | Genome-fragment | 3.68  | 0     |
| S16_vs_156096  full       | 1402  | No  | NA   | 0 | 1 | Not-determined | Genome-fragment | NA    | 0     |
| S16_vs_156134  full       | 10702 | No  | NA   | 0 | 2 | Not-determined | Genome-fragment | NA    | 0     |
| S17_vs_k141_110669  full  | 3058  | No  | NA   | 0 | 2 | Low-quality    | Genome-fragment | 0.97  | 0     |
| S16_vs_156199  full       | 3063  | No  | NA   | 0 | 0 | Not-determined | Genome-fragment | NA    | 0     |
| S5_extracted_k141_20858   | 3058  | No  | NA   | 0 | 0 | Low-quality    | Genome-fragment | 6.37  | 0     |
| S16_vs_156266  full       | 4025  | No  | NA   | 0 | 3 | Not-determined | Genome-fragment | NA    | 0     |
| S7_vs_89593  full         | 3058  | No  | NA   | 0 | 1 | Low-quality    | Genome-fragment | 7.46  | 0     |
| S12_extracted_k141_41087  | 3058  | No  | NA   | 0 | 2 | Low-quality    | Genome-fragment | 3.28  | 0     |
| S16_vs_156442  full       | 2024  | No  | NA   | 0 | 0 | Not-determined | Genome-fragment | NA    | 0     |
| S16_vs_156461  full       | 4602  | No  | NA   | 0 | 4 | Not-determined | Genome-fragment | NA    | 0     |
| S6_vs_k141_52783  full    | 3058  | No  | NA   | 1 | 0 | Low-quality    | Genome-fragment | 5.49  | 0     |
| S16_vs_156549  full       | 3619  | No  | NA   | 0 | 1 | Not-determined | Genome-fragment | NA    | 0     |
| S16_vs_156573  full       | 5050  | No  | NA   | 0 | 1 | Not-determined | Genome-fragment | NA    | 0     |
| S16_vs_156584  full       | 1554  | No  | NA   | 0 | 0 | Not-determined | Genome-fragment | NA    | 0     |
| S16_vs_156592  full       | 12545 | No  | NA   | 0 | 6 | Not-determined | Genome-fragment | NA    | 0     |
| S17_extracted_k141_4843   | 3059  | No  | NA   | 0 | 0 | Low-quality    | Genome-fragment | 4.67  | 0     |
| S17_vs_k141_29489  full   | 3059  | No  | NA   | 0 | 1 | Low-quality    | Genome-fragment | 0.76  | 0     |
| S16_vs_156660  full       | 1076  | No  | NA   | 0 | 2 | Not-determined | Genome-fragment | NA    | 0     |
| S16_vs_156750  full       | 1010  | No  | NA   | 0 | 0 | Not-determined | Genome-fragment | NA    | 0     |
| S16_vs_156845  full       | 2668  | No  | NA   | 0 | 1 | Not-determined | Genome-fragment | NA    | 0     |
| S16_vs_156916  full       | 5086  | No  | NA   | 0 | 1 | Not-determined | Genome-fragment | NA    | 0     |
| S16_vs_156921  full       | 2273  | No  | NA   | 0 | 0 | Not-determined | Genome-fragment | NA    | 0     |
| S9_vs_k141_82552  full    | 3059  | No  | NA   | 0 | 0 | Low-quality    | Genome-fragment | 6.08  | 0     |
| S16_vs_157107  full       | 2891  | No  | NA   | 0 | 2 | Not-determined | Genome-fragment | NA    | 0     |
| S1_extracted_k141_140255  | 3059  | No  | NA   | 0 | 0 | Low-quality    | Genome-fragment | 7.73  | 0     |
| S16_vs_157193  full       | 3064  | No  | NA   | 0 | 1 | Not-determined | Genome-fragment | NA    | 0     |
| S16_vs_157204  full       | 4847  | No  | NA   | 0 | 4 | Not-determined | Genome-fragment | NA    | 0     |
| S16_vs_157324  full       | 2838  | No  | NA   | 0 | 0 | Not-determined | Genome-fragment | NA    | 0     |
| S8_extracted_k141_50999   | 3059  | No  | NA   | 0 | 1 | Low-quality    | Genome-fragment | 1.07  | 0     |
| S16_vs_157380  full       | 2522  | No  | NA   | 0 | 2 | Not-determined | Genome-fragment | NA    | 0     |
| S12_extracted_147568      | 3060  | No  | NA   | 1 | 0 | Low-quality    | Genome-fragment | 4.78  | 0     |
| S16_vs_158231  full       | 3060  | No  | NA   | 0 | 0 | Low-quality    | Genome-fragment | 1.52  | 0     |
| S12_extracted_k141_173426 | 3060  | No  | NA   | 0 | 2 | Low-quality    | Genome-fragment | 9.77  | 0     |
| S6_vs_k141_20474  full    | 3060  | No  | NA   | 2 | 0 | Low-quality    | Genome-fragment | 8.23  | 0     |
| S16_vs_157747  full       | 1312  | No  | NA   | 0 | 1 | Not-determined | Genome-fragment | NA    | 0     |
| S16_vs_157764  full       | 1414  | No  | NA   | 0 | 1 | Not-determined | Genome-fragment | NA    | 0     |
| S16_vs_157797  full       | 6888  | No  | NA   | 0 | 3 | Not-determined | Genome-fragment | NA    | 0     |
| S1_vs_k141_115278  full   | 2061  | No  | NA   | 0 | 1 | Low-quality    | Genome-fragment | 2.04  | 0     |
| S12_extracted_k141_184294 | 3061  | No  | NA   | 0 | 2 | Low-quality    | Genome-fragment | 5.86  | 0     |
| S16_vs_158098  full       | 5473  | No  | NA   | 0 | 1 | Not-determined | Genome-fragment | NA    | 0     |
| S16_vs_158220  full       | 3715  | No  | NA   | 0 | 1 | Not-determined | Genome-fragment | NA    | 0     |
| S12_extracted_k141_131599 | 3061  | No  | NA   | 0 | 2 | Low-quality    | Genome-fragment | 0.44  | 0     |
| S16_vs_158446  full       | 2403  | No  | NA   | 0 | 1 | Not-determined | Genome-fragment | NA    | 0     |
| S12_vs_k141_185231  full  | 3061  | No  | NA   | 3 | 0 | Low-quality    | Genome-fragment | 7.21  | 0     |
| S8_vs_k141_127625  full   | 3061  | No  | NA   | 0 | 0 | Low-quality    | Genome-fragment | 7.86  | 0     |
| S14_extracted_k141_40014  | 3062  | No  | NA   | 1 | 0 | Low-quality    | Genome-fragment | 2.06  | 0     |
| S16_vs_158718  full       | 1020  | No  | NA   | 0 | 3 | Not-determined | Genome-fragment | NA    | 0     |
| S5_extracted_k141_49241   | 3062  | No  | NA   | 0 | 0 | Low-quality    | Genome-fragment | 4.84  | 0     |
| S8_extracted_k141_88757   | 3062  | No  | NA   | 2 | 0 | Low-quality    | Genome-fragment | 5.11  | 0     |
| S14_extracted_k141_16360  | 3063  | Yes | 693  | 1 | 1 | Low-quality    | Genome-fragment | 1.68  | 77.38 |
| S16_vs_158850  full       | 2167  | No  | NA   | 1 | 0 | Not-determined | Genome-fragment | NA    | 0     |
| S12_vs_k141_137839  full  | 3063  | No  | NA   | 1 | 0 | Low-quality    | Genome-fragment | 8.49  | 0     |
| S16_vs_158978  full       | 1124  | No  | NA   | 0 | 1 | Not-determined | Genome-fragment | NA    | 0     |
| S16_vs_159019  full       | 3207  | No  | NA   | 0 | 1 | Not-determined | Genome-fragment | NA    | 0     |
| S15_extracted_68494       | 3063  | No  | NA   | 0 | 0 | Low-quality    | Genome-fragment | 4.97  | 0     |
| S16_vs_159089  full       | 1841  | No  | NA   | 0 | 0 | Not-determined | Genome-fragment | NA    | 0     |
| S16_vs_159111  full       | 2321  | No  | NA   | 0 | 2 | Not-determined | Genome-fragment | NA    | 0     |
| S16_vs_159133  full       | 1956  | No  | NA   | 0 | 2 | Not-determined | Genome-fragment | NA    | 0     |
| S16_vs_159193  full       | 1025  | No  | NA   | 0 | 1 | Not-determined | Genome-fragment | NA    | 0     |
| S16_vs_159359  full       | 1578  | No  | NA   | 0 | 1 | Not-determined | Genome-fragment | NA    | 0     |
| S6_extracted_k141_44608   | 3063  | No  | NA   | 0 | 0 | Low-quality    | Genome-fragment | 10.68 | 0     |
| S16_vs_159439  full       | 1740  | No  | NA   | 0 | 3 | Not-determined | Genome-fragment | NA    | 0     |
| S9_extracted_k141_15656   | 3064  | No  | NA   | 2 | 0 | Low-quality    | Genome-fragment | 4.55  | 0     |
| S8_extracted_k141_141498  | 3065  | No  | NA   | 0 | 2 | Low-quality    | Genome-fragment | 2.99  | 0     |
| S14_vs_k141_105897  full  | 3066  | No  | NA   | 0 | 0 | Low-quality    | Genome-fragment | 4.04  | 0     |
| S16_vs_159772  full       | 2647  | No  | NA   | 0 | 3 | Not-determined | Genome-fragment | NA    | 0     |
| S16_vs_159832  full       | 1842  | No  | NA   | 0 | 0 | Not-determined | Genome-fragment | NA    | 0     |
| S8_vs_k141_136509  full   | 3066  | No  | NA   | 0 | 3 | Low-quality    | Genome-fragment | 1.03  | 0     |
| S5_vs_k141_30249  full    | 3067  | No  | NA   | 0 | 0 | Low-quality    | Genome-fragment | 1.17  | 0     |
| S7_vs_56531  full         | 3067  | No  | NA   | 0 | 0 | Low-quality    | Genome-fragment | 4.27  | 0     |
| S16_vs_160109  full       | 3363  | No  | NA   | 0 | 2 | Not-determined | Genome-fragment | NA    | 0     |
| S16_vs_160243  full       | 2470  | No  | NA   | 0 | 0 | Not-determined | Genome-fragment | NA    | 0     |
| S16_vs_160577  full       | 1774  | No  | NA   | 0 | 2 | Not-determined | Genome-fragment | NA    | 0     |
| S16_vs_160650  full       | 1418  | No  | NA   | 0 | 2 | Not-determined | Genome-fragment | NA    | 0     |
| S10_vs_161118  full       | 3067  | No  | NA   | 0 | 0 | Low-quality    | Genome-fragment | 5.09  | 0     |
| S12_extracted_k141_98943  | 3067  | No  | NA   | 0 | 1 | Low-quality    | Genome-fragment | 5.36  | 0     |
| S16_vs_160776  full       | 3024  | No  | NA   | 0 | 3 | Not-determined | Genome-fragment | NA    | 0     |
| S16_vs_160811  full       | 12605 | No  | NA   | 0 | 1 | Not-determined | Genome-fragment | NA    | 0     |
| S16_vs_160860  full       | 2780  | No  | NA   | 0 | 1 | Not-determined | Genome-fragment | NA    | 0     |
| S12_extracted_k141_83306  | 3067  | No  | NA   | 0 | 0 | Low-quality    | Genome-fragment | 5.47  | 0     |
| S17_vs_k141_11561  full   | 2068  | No  | NA   | 0 | 2 | Low-quality    | Genome-fragment | 10.26 | 0     |
| S17_vs_k141_109312  full  | 3068  | Yes | 2325 | 1 | 1 | Low-quality    | Genome-fragment | 1     | 24.22 |
| S16_vs_161018  full       | 4585  | No  | NA   | 0 | 1 | Not-determined | Genome-fragment | NA    | 0     |
| S1_extracted_k141_150732  | 3068  | No  | NA   | 5 | 0 | Low-quality    | Genome-fragment | 4.57  | 0     |
| S5_extracted_k141_122558  | 3068  | No  | NA   | 0 | 0 | Low-quality    | Genome-fragment | 5.77  | 0     |
| S16_vs_161247  full       | 5030  | No  | NA   | 0 | 1 | Not-determined | Genome-fragment | NA    | 0     |
| S16_vs_161310  full       | 2639  | No  | NA   | 0 | 0 | Not-determined | Genome-fragment | NA    | 0     |
| S16_vs_161425  full       | 2868  | No  | NA   | 0 | 0 | Not-determined | Genome-fragment | NA    | 0     |
| S5_extracted_k141_35172   | 3068  | No  | NA   | 3 | 0 | Low-quality    | Genome-fragment | 10.11 | 0     |
| S7_extracted_132886       | 3068  | No  | NA   | 0 | 0 | Low-quality    | Genome-fragment | 2.78  | 0     |
| S12_vs_k141_19641  full   | 2068  | No  | NA   | 0 | 0 | Low-quality    | Genome-fragment | 4.04  | 0     |
| S9_extracted_k141_37999   | 3069  | No  | NA   | 1 | 0 | Low-quality    | Genome-fragment | 1.99  | 0     |
| S9_vs_k141_48095  full    | 3069  | No  | NA   | 1 | 0 | Low-quality    | Genome-fragment | 5.9   | 0     |
| S16_vs_161982  full       | 1176  | No  | NA   | 0 | 0 | Not-determined | Genome-fragment | NA    | 0     |
| S16_vs_162034  full       | 3771  | No  | NA   | 0 | 2 | Not-determined | Genome-fragment | NA    | 0     |
| S1_vs_k141_116093  full   | 3069  | No  | NA   | 2 | 0 | Low-quality    | Genome-fragment | 8.99  | 0     |
| S16_vs_162256  full       | 1239  | No  | NA   | 0 | 1 | Not-determined | Genome-fragment | NA    | 0     |
| S5_vs_k141_122516  full   | 3069  | No  | NA   | 0 | 0 | Low-quality    | Genome-fragment | 5.33  | 0     |
| S16_vs_162328  full       | 7293  | No  | NA   | 0 | 1 | Not-determined | Genome-fragment | NA    | 0     |
| S9_extracted_k141_10506   | 3070  | No  | NA   | 2 | 0 | Low-quality    | Genome-fragment | 4.93  | 0     |
| S16_vs_162466  full       | 6753  | No  | NA   | 0 | 1 | Not-determined | Genome-fragment | NA    | 0     |
| S16_vs_162586  full       | 2123  | No  | NA   | 0 | 2 | Not-determined | Genome-fragment | NA    | 0     |
| S9_vs_k141_3398  full     | 3071  | No  | NA   | 0 | 0 | Low-quality    | Genome-fragment | 6.55  | 0     |
| S16_vs_162644  full       | 3731  | No  | NA   | 0 | 4 | Not-determined | Genome-fragment | NA    | 0     |
| S11_extracted_k141_29292  | 3071  | No  | NA   | 2 | 0 | Low-quality    | Genome-fragment | 4.75  | 0     |
| S16_vs_162809  full       | 1838  | No  | NA   | 0 | 1 | Not-determined | Genome-fragment | NA    | 0     |
| S16_vs_162916  full       | 1713  | No  | NA   | 0 | 0 | Not-determined | Genome-fragment | NA    | 0     |
| S16_vs_163041  full       | 1434  | No  | NA   | 0 | 0 | Not-determined | Genome-fragment | NA    | 0     |
| S3_extracted_k141_116913  | 3071  | No  | NA   | 1 | 0 | Low-quality    | Genome-fragment | 4.19  | 0     |
| S16_vs_163163  full       | 1303  | No  | NA   | 0 | 1 | Not-determined | Genome-fragment | NA    | 0     |
| S16_vs_163243  full       | 1594  | No  | NA   | 0 | 1 | Not-determined | Genome-fragment | NA    | 0     |
| S16_vs_163339  full       | 10261 | No  | NA   | 0 | 0 | Not-determined | Genome-fragment | NA    | 0     |
| S5_vs_k141_32151  full    | 3071  | No  | NA   | 0 | 2 | Low-quality    | Genome-fragment | 5.09  | 0     |
| S16_vs_163404  full       | 1704  | No  | NA   | 0 | 1 | Not-determined | Genome-fragment | NA    | 0     |
| S16_vs_163505  full       | 1896  | No  | NA   | 0 | 1 | Not-determined | Genome-fragment | NA    | 0     |
| S7_extracted_51873        | 3071  | No  | NA   | 0 | 0 | Low-quality    | Genome-fragment | 1.75  | 0     |
| S16_vs_163663  full       | 1225  | No  | NA   | 0 | 0 | Not-determined | Genome-fragment | NA    | 0     |
| S16_vs_163672  full       | 5553  | No  | NA   | 0 | 0 | Not-determined | Genome-fragment | NA    | 0     |
| S16_vs_163742  full       | 1719  | No  | NA   | 0 | 0 | Not-determined | Genome-fragment | NA    | 0     |
| S17_vs_k141_152043  full  | 3072  | No  | NA   | 0 | 0 | Low-quality    | Genome-fragment | 8.09  | 0     |
| S16_vs_163753  full       | 3040  | No  | NA   | 0 | 0 | Not-determined | Genome-fragment | NA    | 0     |
| S9_extracted_k141_74899   | 3072  | No  | NA   | 2 | 0 | Low-quality    | Genome-fragment | 2.14  | 0     |



|                           |             |       |     |    |    |                |                 |                 |    |       |
|---------------------------|-------------|-------|-----|----|----|----------------|-----------------|-----------------|----|-------|
| S16_v1_165571             | [full]      | 4401  | No  | NA | 0  | 1              | Not-determined  | Genome-fragment | NA | 0     |
| S16_v1_165655             | [full]      | 1919  | No  | NA | 0  | 2              | Not-determined  | Genome-fragment | NA | 0     |
| S16_v1_165662             | [full]      | 21289 | No  | NA | 13 | 0              | Medium-quality  | Genome-fragment | NA | 68.38 |
| S6_v1_k141_18645          | [full]      | 3075  | No  | NA | 2  | 0              | Low-quality     | Genome-fragment | NA | 5.02  |
| S16_v1_165688             | [full]      | 1224  | No  | NA | 0  | 1              | Not-determined  | Genome-fragment | NA | 0     |
| S8_v1_k141_2050           | [full]      | 3075  | No  | NA | 0  | 2              | Low-quality     | Genome-fragment | NA | 2.74  |
| S16_v1_165781             | [full]      | 7210  | No  | NA | 0  | 0              | Not-determined  | Genome-fragment | NA | 0     |
| S17_v1_k141_67581         | [full]      | 3076  | No  | NA | 2  | 0              | Low-quality     | Genome-fragment | NA | 4.66  |
| S16_v1_166106             | [full]      | 3452  | No  | NA | 0  | 0              | Not-determined  | Genome-fragment | NA | 0     |
| S17_v1_k141_5960          | [full]      | 3076  | No  | NA | 6  | 0              | Low-quality     | Genome-fragment | NA | 6.6   |
| S14_extracted_k141_55312  | [full]      | 3076  | No  | NA | 0  | 1              | Low-quality     | Genome-fragment | NA | 2.32  |
| S3_v1_k141_120086         | [full]      | 3076  | No  | NA | 0  | 2              | Low-quality     | Genome-fragment | NA | 1.38  |
| S7_v1_28099               | [full]      | 3076  | No  | NA | 3  | 0              | Low-quality     | Genome-fragment | NA | 8.74  |
| S16_v1_166242             | [full]      | 1837  | No  | NA | 0  | 1              | Not-determined  | Genome-fragment | NA | 0     |
| S16_v1_166246             | [full]      | 5041  | No  | NA | 0  | 3              | Not-determined  | Genome-fragment | NA | 0     |
| S16_v1_166309             | [full]      | 3182  | No  | NA | 0  | 0              | Not-determined  | Genome-fragment | NA | 0     |
| S8_extracted_k141_5007    | [full]      | 3076  | No  | NA | 0  | 0              | Low-quality     | Genome-fragment | NA | 4.84  |
| S16_v1_166540             | [full]      | 2278  | No  | NA | 0  | 2              | Not-determined  | Genome-fragment | NA | 0     |
| S16_v1_166604             | [full]      | 2022  | No  | NA | 0  | 0              | Not-determined  | Genome-fragment | NA | 0     |
| S8_extracted_k141_165740  | [full]      | 3077  | No  | NA | 5  | 0              | Low-quality     | Genome-fragment | NA | 5.11  |
| S16_v1_166852             | [full]      | 1148  | No  | NA | 0  | 0              | Not-determined  | Genome-fragment | NA | 0     |
| S16_v1_166938             | [full]      | 1160  | No  | NA | 0  | 2              | Not-determined  | Genome-fragment | NA | 0     |
| S16_v1_166972             | [full]      | 1429  | No  | NA | 0  | 1              | Not-determined  | Genome-fragment | NA | 0     |
| S16_v1_166989             | [full]      | 1262  | No  | NA | 0  | 0              | Not-determined  | Genome-fragment | NA | 0     |
| S16_v1_166997             | [full]      | 1471  | No  | NA | 0  | 1              | Not-determined  | Genome-fragment | NA | 2.2   |
| S9_extracted_k141_842     | [full]      | 3079  | No  | NA | 1  | 0              | Low-quality     | Genome-fragment | NA | 1.51  |
| S3_v1_k141_28985          | [full]      | 3079  | No  | NA | 0  | 0              | Low-quality     | Genome-fragment | NA | 5.03  |
| S10_extracted_85921       | [full]      | 3079  | No  | NA | 0  | 1              | Low-quality     | Genome-fragment | NA | 0     |
| S16_v1_167206             | [full]      | 1906  | No  | NA | 2  | Not-determined | Genome-fragment | NA              | 0  |       |
| S17_extracted_k141_13030  | [full]      | 3080  | No  | NA | 0  | 1              | Low-quality     | Genome-fragment | NA | 0     |
| S5_extracted_k141_4281    | [full]      | 3080  | No  | NA | 0  | 4              | Low-quality     | Genome-fragment | NA | 1.28  |
| S16_v1_167255             | [full]      | 1725  | No  | NA | 0  | 2              | Not-determined  | Genome-fragment | NA | 0     |
| S16_v1_167324             | [full]      | 2647  | No  | NA | 0  | 1              | Not-determined  | Genome-fragment | NA | 0     |
| S7_v1_24806               | [full]      | 3080  | No  | NA | 0  | 2              | Low-quality     | Genome-fragment | NA | 4.73  |
| S16_v1_167532             | [full]      | 8891  | No  | NA | 0  | 5              | Not-determined  | Genome-fragment | NA | 0     |
| S16_v1_168081             | [full]      | 3080  | No  | NA | 0  | 0              | Low-quality     | Genome-fragment | NA | 3.84  |
| S16_v1_167605             | [full]      | 6339  | No  | NA | 0  | 4              | Not-determined  | Genome-fragment | NA | 0     |
| S16_v1_167607             | [full]      | 1918  | No  | NA | 0  | 1              | Not-determined  | Genome-fragment | NA | 0     |
| S16_v1_167641             | [full]      | 1142  | No  | NA | 0  | 1              | Not-determined  | Genome-fragment | NA | 0     |
| S10_extracted_47106       | [full]      | 3080  | No  | NA | 1  | 0              | Low-quality     | Genome-fragment | NA | 1.8   |
| S2_extracted_k141_7800    | [full]      | 3080  | No  | NA | 0  | 1              | Low-quality     | Genome-fragment | NA | 5.34  |
| S16_v1_167836             | [full]      | 1895  | No  | NA | 0  | 2              | Not-determined  | Genome-fragment | NA | 0     |
| S16_v1_167894             | [full]      | 1757  | No  | NA | 0  | 2              | Not-determined  | Genome-fragment | NA | 0     |
| S16_v1_167905             | [full]      | 3224  | No  | NA | 0  | 1              | Not-determined  | Genome-fragment | NA | 0     |
| S16_v1_168040             | [full]      | 3373  | No  | NA | 0  | 1              | Not-determined  | Genome-fragment | NA | 0     |
| S16_v1_168068             | [full]      | 1405  | No  | NA | 0  | 0              | Not-determined  | Genome-fragment | NA | 0     |
| S16_v1_168087             | [full]      | 2186  | No  | NA | 0  | 0              | Not-determined  | Genome-fragment | NA | 0     |
| S16_v1_168114             | [full]      | 1964  | No  | NA | 0  | 2              | Not-determined  | Genome-fragment | NA | 0     |
| S16_v1_168256             | [full]      | 1106  | No  | NA | 0  | 1              | Not-determined  | Genome-fragment | NA | 0     |
| S16_v1_168377             | [full]      | 3133  | No  | NA | 0  | 3              | Not-determined  | Genome-fragment | NA | 0     |
| S16_v1_168662             | [full]      | 3544  | No  | NA | 0  | 0              | Not-determined  | Genome-fragment | NA | 0     |
| S16_v1_168682             | [full]      | 4251  | No  | NA | 0  | 3              | Not-determined  | Genome-fragment | NA | 0     |
| S16_v1_168757             | [full]      | 2907  | No  | NA | 0  | 1              | Not-determined  | Genome-fragment | NA | 0     |
| S17_v1_k141_54964         | [full]      | 3081  | No  | NA | 1  | 0              | Low-quality     | Genome-fragment | NA | 6.41  |
| S16_v1_168829             | [full]      | 6152  | No  | NA | 4  | 4              | Not-determined  | Genome-fragment | NA | 0     |
| S7_v1_71171               | [full]      | 3081  | No  | NA | 4  | 0              | Low-quality     | Genome-fragment | NA | 9.13  |
| S16_v1_169121             | [full]      | 5117  | No  | NA | 0  | 4              | Not-determined  | Genome-fragment | NA | 0     |
| S16_v1_169202             | [full]      | 5757  | No  | NA | 0  | 1              | Not-determined  | Genome-fragment | NA | 0     |
| S16_v1_169212             | [full]      | 1784  | No  | NA | 0  | 2              | Not-determined  | Genome-fragment | NA | 0     |
| S16_v1_169228             | [full]      | 2266  | No  | NA | 0  | 2              | Not-determined  | Genome-fragment | NA | 0     |
| S16_v1_169273             | [full]      | 4156  | No  | NA | 0  | 4              | Not-determined  | Genome-fragment | NA | 0     |
| S16_v1_169320             | [full]      | 1745  | No  | NA | 0  | 0              | Not-determined  | Genome-fragment | NA | 0     |
| S16_v1_169361             | [full]      | 1489  | No  | NA | 0  | 2              | Not-determined  | Genome-fragment | NA | 0     |
| S12_extracted_k141_41456  | [full]      | 3082  | No  | NA | 0  | 2              | Low-quality     | Genome-fragment | NA | 1.2   |
| S15_extracted_53136       | [full]      | 3082  | No  | NA | 3  | 0              | Low-quality     | Genome-fragment | NA | 7.23  |
| S5_v1_k141_122223         | [full]      | 3083  | No  | NA | 4  | 0              | Low-quality     | Genome-fragment | NA | 8.39  |
| S16_v1_169591             | [full]      | 2222  | No  | NA | 0  | 2              | Not-determined  | Genome-fragment | NA | 0     |
| S16_v1_169650             | [full]      | 1175  | No  | NA | 0  | 0              | Not-determined  | Genome-fragment | NA | 0     |
| S7_v1_2075                | [full]      | 3084  | Yes | NA | 1  | 1              | Low-quality     | Genome-fragment | NA | 2.17  |
| S8_v1_k141_34640          | [full]      | 3084  | No  | NA | 0  | 0              | Low-quality     | Genome-fragment | NA | 7.4   |
| S17_v1_k141_98515         | [full]      | 3085  | No  | NA | 0  | 2              | Low-quality     | Genome-fragment | NA | 3.23  |
| S9_extracted_k141_50174   | [full]      | 3086  | No  | NA | 0  | 1              | Low-quality     | Genome-fragment | NA | 2.62  |
| S3_extracted_k141_31760   | [full]      | 3086  | No  | NA | 0  | 0              | Low-quality     | Genome-fragment | NA | 7.79  |
| S7_extracted_21097        | [full]      | 3086  | No  | NA | 0  | 2              | Low-quality     | Genome-fragment | NA | 1.54  |
| S14_extracted_k141_91325  | [full]      | 3087  | No  | NA | 0  | 0              | Low-quality     | Genome-fragment | NA | 10.17 |
| S16_v1_170009             | [full]      | 1249  | No  | NA | 3  | 0              | Not-determined  | Genome-fragment | NA | 0     |
| S16_v1_170040             | [full]      | 1768  | No  | NA | 0  | 2              | Not-determined  | Genome-fragment | NA | 0     |
| S1_v1_k141_17581          | [full]      | 3087  | No  | NA | 1  | 0              | Low-quality     | Genome-fragment | NA | 6.5   |
| S3_extracted_k141_50954   | [full]      | 3087  | No  | NA | 0  | 0              | Low-quality     | Genome-fragment | NA | 4.98  |
| S5_v1_k141_8702           | [full]      | 3087  | No  | NA | 1  | 0              | Low-quality     | Genome-fragment | NA | 7.75  |
| S16_extracted_50555       | [full]      | 3087  | No  | NA | 2  | 0              | Low-quality     | Genome-fragment | NA | 5.1   |
| S4_extracted_7619         | [full]      | 3087  | No  | NA | 0  | 1              | Low-quality     | Genome-fragment | NA | 4.88  |
| S17_extracted_k141_112120 | [full]      | 3089  | No  | NA | 0  | 1              | Low-quality     | Genome-fragment | NA | 2.25  |
| S16_v1_170254             | [full]      | 10419 | No  | NA | 0  | 7              | Not-determined  | Genome-fragment | NA | 0     |
| S6_v1_k141_15916          | [full]      | 3089  | No  | NA | 0  | 1              | Low-quality     | Genome-fragment | NA | 1.34  |
| S16_v1_170356             | [full]      | 3097  | No  | NA | 0  | 1              | Not-determined  | Genome-fragment | NA | 0     |
| S16_v1_170425             | [full]      | 2064  | No  | NA | 0  | 1              | Not-determined  | Genome-fragment | NA | 0     |
| S9_v1_k141_30792          | [full]      | 3090  | No  | NA | 0  | 2              | Low-quality     | Genome-fragment | NA | 2.87  |
| S16_v1_170504             | [full]      | 1109  | No  | NA | 0  | 1              | Not-determined  | Genome-fragment | NA | 0     |
| S16_v1_170516             | [full]      | 1211  | No  | NA | 0  | 0              | Not-determined  | Genome-fragment | NA | 0     |
| S16_v1_170520             | [full]      | 6392  | No  | NA | 0  | 2              | Not-determined  | Genome-fragment | NA | 0     |
| S14_v1_k141_102833        | [full]      | 3090  | No  | NA | 0  | 0              | Low-quality     | Genome-fragment | NA | 8.27  |
| S16_v1_170537             | [full]      | 1299  | No  | NA | 0  | 1              | Not-determined  | Genome-fragment | NA | 0     |
| S7_v1_94036               | [full]      | 3090  | No  | NA | 0  | 0              | Low-quality     | Genome-fragment | NA | 8.86  |
| S16_v1_80890              | [full]      | 3090  | No  | NA | 0  | 1              | Low-quality     | Genome-fragment | NA | 7.67  |
| S16_v1_170737             | [full]      | 1208  | No  | NA | 0  | 0              | Not-determined  | Genome-fragment | NA | 0     |
| S16_v1_170738             | [full]      | 1661  | No  | NA | 0  | 0              | Not-determined  | Genome-fragment | NA | 0     |
| S16_v1_170800             | [full]      | 2626  | No  | NA | 0  | 1              | Not-determined  | Genome-fragment | NA | 0     |
| S12_v1_k141_170752        | [full]      | 3090  | No  | NA | 0  | 0              | Low-quality     | Genome-fragment | NA | 4.68  |
| S16_v1_170856             | [full]      | 5072  | No  | NA | 0  | 0              | Not-determined  | Genome-fragment | NA | 0     |
| S16_v1_170900             | [full]      | 1573  | No  | NA | 0  | 1              | Not-determined  | Genome-fragment | NA | 0     |
| S16_v1_170908             | [full]      | 1653  | No  | NA | 0  | 2              | Not-determined  | Genome-fragment | NA | 0     |
| S1_extracted_k141_113065  | [full]      | 3091  | No  | NA | 0  | 2              | Low-quality     | Genome-fragment | NA | 6.19  |
| S3_extracted_k141_113139  | [full]      | 3091  | Yes | NA | 3  | 1              | Low-quality     | Genome-fragment | NA | 2.35  |
| S16_v1_171129             | [full]      | 4147  | No  | NA | 0  | 2              | Not-determined  | Genome-fragment | NA | 0     |
| S16_v1_171192             | [full]      | 1903  | No  | NA | 0  | 1              | Not-determined  | Genome-fragment | NA | 0     |
| S7_v1_544                 | [full]      | 3091  | No  | NA | 0  | 4              | Low-quality     | Genome-fragment | NA | 1.45  |
| S16_v1_171243             | [full]      | 2583  | No  | NA | 0  | 2              | Not-determined  | Genome-fragment | NA | 0     |
| S16_v1_171249             | [full]      | 1774  | No  | NA | 0  | 0              | Not-determined  | Genome-fragment | NA | 0     |
| S12_v1_k141_42082         | [full]      | 3091  | No  | NA | 0  | 3              | Low-quality     | Genome-fragment | NA | 3.15  |
| S16_v1_171431             | [full]      | 2053  | No  | NA | 0  | 0              | Not-determined  | Genome-fragment | NA | 0     |
| S16_v1_171598             | [full]      | 3153  | No  | NA | 0  | 1              | Not-determined  | Genome-fragment | NA | 0     |
| S16_v1_171664             | [full]      | 5782  | No  | NA | 0  | 0              | Not-determined  | Genome-fragment | NA | 0     |
| S6_extracted_k141_51868   | [full]      | 3091  | No  | NA | 0  | 3              | Low-quality     | Genome-fragment | NA | 1.42  |
| S16_v1_171726             | [full]      | 2760  | No  | NA | 0  | 1              | Not-determined  | Genome-fragment | NA | 0     |
| S16_v1_171745             | [full]      | 2722  | No  | NA | 0  | 1              | Not-determined  | Genome-fragment | NA | 0     |
| S16_v1_171944             | [full]      | 1719  | No  | NA | 0  | 1              | Not-determined  | Genome-fragment | NA | 0     |
| S16_v1_171945             | [full]      | 1047  | No  | NA | 0  | 2              | Not-determined  | Genome-fragment | NA | 0     |
| S6_v1_k141_16518          | [full]      | 3092  | No  | NA | 0  | 0              | Low-quality     | Genome-fragment | NA | 1.73  |
| S16_v1_172167             | [full]      | 1887  | No  | NA | 0  | 3              | Not-determined  | Genome-fragment | NA | 0     |
| S14_v1_k141_113447        | [full]      | 3093  | No  | NA | 0  | 1              | Low-quality     | Genome-fragment | NA | 1.48  |
| S16_v1_172252             | [full]      | 4502  | No  | NA | 0  | 1              | Not-determined  | Genome-fragment | NA | 0     |
| S12_extracted_k141_104962 | [full]      | 3093  | No  | NA | 1  | 0              | Low-quality     | Genome-fragment | NA | 5.2   |
| S7_v1_55433               | [full]      | 3094  | No  | NA | 1  | 1              | Low-quality     | Genome-fragment | NA | 8.15  |
| S8_v1_k141_193221         | [full]      | 3094  | No  | NA | 0  | 2              | Low-quality     | Genome-fragment | NA | 3.58  |
| S17_v1_k141_25690         | [full]      | 3095  | No  | NA | 0  | 0              | Low-quality     | Genome-fragment | NA | 3.83  |
| S3_extracted_k141_92464   | [full]      | 3095  | No  | NA | 2  | 0              | Low-quality     | Genome-fragment | NA | 1.94  |
| S12_v1_k141_40748         | [0_partial] | 3095  | No  | NA | 0  | 0              | Low-quality     | Genome-fragment | NA | 37.33 |
| S16_v1_172412             | [full]      | 9934  | No  | NA | 0  | 2              | Not-determined  | Genome-fragment | NA | 0     |
| S17_v1_k141_160147        | [full]      | 3096  | No  | NA | 0  | 1              | Low-quality     | Genome-fragment | NA | 1.03  |
| S16_v1_172443             | [full]      | 5000  | No  | NA | 0  | 4              | Not-determined  | Genome-fragment | NA | 0     |
| S16_v1_172573             | [full]      | 2317  | No  | NA | 0  | 0              | Not-determined  | Genome-fragment | NA | 0     |
| S16_v1_172677             | [full]      | 1087  | No  | NA | 0  | 2              | Not-determined  | Genome-fragment | NA | 0     |
| S9_extracted_k141_76409   | [full]      | 3096  | No  | NA | 1  | 0              | Low-quality     | Genome-fragment | NA | 7.65  |
| S9_v1_k141_21456          | [full]      | 3096  | No  | NA | 0  | 0              | Low-quality     | Genome-fragment | NA | 6.85  |
| S16_v1_172769             | [full]      | 2425  | No  | NA | 0  | 0              | Not-determined  | Genome-fragment | NA | 0     |
| S16_v1_172766             | [full]      | 1786  | No  | NA | 0  | 0              | Not-determined  | Genome-fragment | NA | 0     |
| S16_v1_172884             | [full]      | 4279  | No  | NA | 0  | 0              | Not-determined  | Genome-fragment | NA | 0     |
| S16_v1_172885             | [full       |       |     |    |    |                |                 |                 |    |       |



|                            |      |     |   |   |                |                 |       |       |
|----------------------------|------|-----|---|---|----------------|-----------------|-------|-------|
| S1_vs_k141_51684  full     | 3103 | NA  | 1 | 0 | Low-quality    | Genome-fragment | 9.33  | 0     |
| S10_vs_73566  full         | 3103 | Yes | 2 | 1 | Low-quality    | Genome-fragment | 1.91  | 12.15 |
| S16_vs_14059  H2gene       | 1083 | NA  | 0 | 0 | Not-determined | Genome-fragment | NA    | 0     |
| S16_vs_14138  H2gene       | 1247 | NA  | 0 | 0 | Not-determined | Genome-fragment | NA    | 0     |
| S12_vs_k141_94249  full    | 3103 | NA  | 0 | 2 | Low-quality    | Genome-fragment | 2.75  | 0     |
| S16_vs_17310  H2gene       | 1814 | NA  | 0 | 0 | Not-determined | Genome-fragment | NA    | 0     |
| S11_vs_k141_66353  full    | 3105 | Yes | 1 | 1 | Low-quality    | Genome-fragment | 1.56  | 11.5  |
| S6_extracted_k141_40397    | 3105 | NA  | 3 | 0 | Low-quality    | Genome-fragment | 6.81  | 0     |
| S14_extracted_k141_45370   | 3106 | NA  | 1 | 0 | Low-quality    | Genome-fragment | 6.59  | 0     |
| S11_vs_k141_96582  full    | 3106 | NA  | 4 | 0 | Low-quality    | Genome-fragment | 5.85  | 0     |
| S16_vs_30491  H2gene       | 1918 | NA  | 0 | 1 | Not-determined | Genome-fragment | NA    | 0     |
| S16_vs_30660  H2gene       | 1490 | NA  | 0 | 0 | Not-determined | Genome-fragment | NA    | 0     |
| S3_extracted_k141_101860   | 3106 | NA  | 1 | 0 | Low-quality    | Genome-fragment | 2.03  | 0     |
| S12_vs_k141_135427  full   | 3106 | NA  | 0 | 0 | Low-quality    | Genome-fragment | 3.51  | 0     |
| S12_vs_k141_161061  H2gene | 3106 | NA  | 1 | 0 | Low-quality    | Genome-fragment | 1.68  | 0     |
| S8_vs_k141_11882  full     | 3106 | NA  | 0 | 0 | Low-quality    | Genome-fragment | 9.34  | 0     |
| S13_vs_1910  full          | 3107 | NA  | 0 | 1 | Low-quality    | Genome-fragment | 5.82  | 0     |
| S16_vs_36732  H2gene       | 1280 | NA  | 0 | 1 | Not-determined | Genome-fragment | NA    | 0     |
| S14_vs_k141_111000  full   | 3107 | NA  | 5 | 0 | Low-quality    | Genome-fragment | 6.52  | 0     |
| S14_vs_k141_56938  full    | 3108 | NA  | 1 | 0 | Low-quality    | Genome-fragment | 4.34  | 0     |
| S3_extracted_k141_125354   | 3108 | NA  | 0 | 5 | Low-quality    | Genome-fragment | 7.93  | 0     |
| S2_vs_k141_89336  full     | 3108 | NA  | 0 | 0 | Low-quality    | Genome-fragment | 7.09  | 0     |
| S2_extracted_k141_3893     | 3108 | NA  | 1 | 0 | Low-quality    | Genome-fragment | 7.91  | 0     |
| S11_vs_k141_75397  full    | 3109 | NA  | 3 | 0 | Low-quality    | Genome-fragment | 6.35  | 0     |
| S16_vs_54375  H2gene       | 1043 | NA  | 0 | 0 | Not-determined | Genome-fragment | NA    | 0     |
| S16_vs_54618  H2gene       | 1863 | NA  | 0 | 1 | Not-determined | Genome-fragment | NA    | 0     |
| S16_vs_55598  H2gene       | 3528 | NA  | 0 | 1 | Not-determined | Genome-fragment | NA    | 0     |
| S5_vs_k141_31620  full     | 3109 | NA  | 2 | 0 | Low-quality    | Genome-fragment | 6.55  | 0     |
| S16_vs_57117  H2gene       | 1291 | NA  | 0 | 1 | Not-determined | Genome-fragment | NA    | 0     |
| S14_vs_k141_102943  full   | 3111 | NA  | 2 | 0 | Low-quality    | Genome-fragment | 2.33  | 0     |
| S3_vs_k141_104263  full    | 3111 | NA  | 0 | 1 | Low-quality    | Genome-fragment | 7.57  | 0     |
| S5_extracted_k141_42610    | 3111 | NA  | 0 | 0 | Low-quality    | Genome-fragment | 10.25 | 0     |
| S12_extracted_k141_161230  | 3111 | NA  | 1 | 0 | Low-quality    | Genome-fragment | 2.13  | 0     |
| S16_vs_69662  H2gene       | 1373 | NA  | 0 | 0 | Not-determined | Genome-fragment | NA    | 0     |
| S16_vs_72979  H2gene       | 1812 | NA  | 0 | 0 | Not-determined | Genome-fragment | NA    | 0     |
| S16_vs_73775  H2gene       | 2590 | NA  | 0 | 1 | Not-determined | Genome-fragment | NA    | 0     |
| S16_vs_43805  full         | 3112 | NA  | 0 | 0 | Low-quality    | Genome-fragment | 7.85  | 0     |
| S10_extracted_33781        | 3112 | NA  | 2 | 0 | Low-quality    | Genome-fragment | 1.61  | 0     |
| S8_vs_k141_5481  full      | 3112 | NA  | 1 | 1 | Low-quality    | Genome-fragment | 11.83 | 0     |
| S16_vs_78302  H2gene       | 1576 | NA  | 0 | 0 | Not-determined | Genome-fragment | NA    | 0     |
| S16_vs_79241  H2gene       | 1958 | NA  | 0 | 0 | Not-determined | Genome-fragment | NA    | 0     |
| S17_vs_k141_132474  full   | 3113 | NA  | 0 | 0 | Low-quality    | Genome-fragment | 1.81  | 0     |
| S8_extracted_k141_177896   | 3113 | NA  | 0 | 1 | Low-quality    | Genome-fragment | 7.61  | 0     |
| S8_extracted_k141_12792    | 3113 | NA  | 0 | 0 | Low-quality    | Genome-fragment | 6.61  | 0     |
| S16_vs_81036  full         | 3114 | NA  | 0 | 0 | Low-quality    | Genome-fragment | 7.53  | 0     |
| S8_vs_k141_1300  full      | 3114 | NA  | 0 | 3 | Low-quality    | Genome-fragment | 0.73  | 0     |
| S16_vs_87418  H2gene       | 1012 | NA  | 0 | 1 | Not-determined | Genome-fragment | NA    | 0     |
| S16_vs_87993  H2gene       | 2439 | NA  | 0 | 0 | Not-determined | Genome-fragment | NA    | 0     |
| S9_extracted_k141_23188    | 3115 | NA  | 0 | 0 | Low-quality    | Genome-fragment | 7.32  | 0     |
| S3_vs_k141_45354  full     | 3115 | NA  | 0 | 1 | Low-quality    | Genome-fragment | 2.25  | 0     |
| S17_extracted_k141_33904   | 3116 | NA  | 0 | 2 | Low-quality    | Genome-fragment | 3.7   | 0     |
| S16_vs_82274  H2gene       | 2390 | NA  | 0 | 2 | Not-determined | Genome-fragment | NA    | 0     |
| S11_vs_k141_48810  full    | 3116 | NA  | 1 | 0 | Low-quality    | Genome-fragment | 6.57  | 0     |
| S13_vs_18873  full         | 3116 | NA  | 0 | 0 | Low-quality    | Genome-fragment | 3.47  | 0     |
| S16_vs_35957  H2gene       | 1218 | NA  | 0 | 0 | Not-determined | Genome-fragment | NA    | 0     |
| S16_vs_58883  H2gene       | 1361 | NA  | 0 | 0 | Not-determined | Genome-fragment | NA    | 0     |
| S16_vs_96351  H2gene       | 1408 | NA  | 0 | 0 | Not-determined | Genome-fragment | NA    | 0     |
| S1_extracted_k141_62449    | 3116 | NA  | 2 | 0 | Low-quality    | Genome-fragment | 2.85  | 0     |
| S13_vs_41063  full         | 3117 | NA  | 0 | 0 | Low-quality    | Genome-fragment | 5.86  | 0     |
| S16_vs_100710  H2gene      | 1375 | NA  | 0 | 0 | Not-determined | Genome-fragment | NA    | 0     |
| S16_vs_103007  H2gene      | 1145 | NA  | 0 | 1 | Not-determined | Genome-fragment | NA    | 0     |
| S5_vs_k141_103860  full    | 3117 | NA  | 0 | 0 | Low-quality    | Genome-fragment | 8.42  | 0     |
| S6_vs_k141_46310  full     | 3117 | NA  | 0 | 1 | Low-quality    | Genome-fragment | 0.85  | 0     |
| S14_vs_k141_72019  full    | 3118 | NA  | 2 | 0 | Low-quality    | Genome-fragment | 7.48  | 0     |
| S11_vs_k141_47699  full    | 3119 | NA  | 0 | 0 | Low-quality    | Genome-fragment | 2.63  | 0     |
| S5_vs_k141_76704  full     | 3119 | NA  | 0 | 0 | Low-quality    | Genome-fragment | 6.22  | 0     |
| S16_vs_108378  H2gene      | 1478 | NA  | 0 | 0 | Not-determined | Genome-fragment | NA    | 0     |
| S16_vs_71295  full         | 3119 | NA  | 2 | 0 | Low-quality    | Genome-fragment | 5.38  | 0     |
| S12_extracted_k141_106136  | 3119 | NA  | 0 | 0 | Low-quality    | Genome-fragment | 6.8   | 0     |
| S1_extracted_k141_30705    | 3120 | NA  | 0 | 0 | Low-quality    | Genome-fragment | 5.34  | 0     |
| S16_vs_112893  H2gene      | 1368 | NA  | 0 | 1 | Not-determined | Genome-fragment | NA    | 0     |
| S3_extracted_k141_107200   | 3120 | NA  | 0 | 0 | Low-quality    | Genome-fragment | 8.35  | 0     |
| S7_extracted_4409          | 3120 | NA  | 0 | 0 | Low-quality    | Genome-fragment | 6.35  | 0     |
| S16_vs_114291  H2gene      | 2611 | NA  | 0 | 1 | Not-determined | Genome-fragment | NA    | 0     |
| S7_extracted_12182         | 3120 | NA  | 0 | 1 | Low-quality    | Genome-fragment | 0.28  | 0     |
| S5_vs_k141_117395  full    | 3122 | NA  | 0 | 2 | Low-quality    | Genome-fragment | 3     | 0     |
| S16_vs_115341  H2gene      | 1557 | NA  | 0 | 0 | Not-determined | Genome-fragment | NA    | 0     |
| S16_vs_118905  H2gene      | 1269 | NA  | 0 | 1 | Not-determined | Genome-fragment | NA    | 0     |
| S7_vs_20887  full          | 3122 | NA  | 0 | 0 | Low-quality    | Genome-fragment | 1.33  | 0     |
| S8_extracted_k141_116717   | 3122 | NA  | 2 | 0 | Low-quality    | Genome-fragment | 6.86  | 0     |
| S5_vs_k141_44935  full     | 3123 | NA  | 1 | 0 | Low-quality    | Genome-fragment | 5.14  | 0     |
| S11_extracted_k141_44224   | 3124 | NA  | 0 | 0 | Low-quality    | Genome-fragment | 5.33  | 0     |
| S10_extracted_54274        | 3124 | NA  | 0 | 1 | Low-quality    | Genome-fragment | 2.18  | 0     |
| S17_extracted_k141_17204   | 3125 | NA  | 9 | 0 | Low-quality    | Genome-fragment | 10.29 | 0     |
| S14_extracted_k141_17573   | 3125 | NA  | 0 | 0 | Low-quality    | Genome-fragment | 10.28 | 0     |
| S6_vs_k141_22840  full     | 3125 | Yes | 1 | 1 | Low-quality    | Genome-fragment | 1.77  | 54.27 |
| S16_vs_126303  H2gene      | 1037 | NA  | 0 | 1 | Not-determined | Genome-fragment | NA    | 0     |
| S8_extracted_k141_81290    | 3125 | NA  | 0 | 2 | Low-quality    | Genome-fragment | 0.44  | 0     |
| S13_extracted_81390        | 3126 | NA  | 0 | 0 | Low-quality    | Genome-fragment | 5.12  | 0     |
| S16_vs_129068  H2gene      | 2063 | NA  | 0 | 1 | Not-determined | Genome-fragment | NA    | 0     |
| S7_vs_35425  full          | 3126 | NA  | 1 | 0 | Low-quality    | Genome-fragment | 4.7   | 0     |
| S4_extracted_15930         | 3127 | NA  | 0 | 0 | Low-quality    | Genome-fragment | 6.86  | 0     |
| S7_vs_94509  full          | 3128 | NA  | 2 | 0 | Low-quality    | Genome-fragment | 8.75  | 0     |
| S12_extracted_k141_165147  | 3128 | NA  | 0 | 0 | Low-quality    | Genome-fragment | 2.88  | 0     |
| S16_vs_17481  full         | 3128 | NA  | 0 | 0 | Low-quality    | Genome-fragment | 5.15  | 0     |
| S10_extracted_78653        | 3129 | NA  | 0 | 0 | Low-quality    | Genome-fragment | 8.31  | 0     |
| S16_vs_132662  H2gene      | 1281 | NA  | 0 | 1 | Not-determined | Genome-fragment | NA    | 0     |
| S17_vs_k141_146420  full   | 3130 | NA  | 0 | 1 | Low-quality    | Genome-fragment | 4.82  | 0     |
| S16_vs_137453  H2gene      | 4715 | NA  | 0 | 1 | Not-determined | Genome-fragment | NA    | 0     |
| S9_extracted_k141_69799    | 3130 | NA  | 2 | 0 | Low-quality    | Genome-fragment | 8.29  | 0     |
| S5_vs_k141_20957  full     | 3130 | NA  | 0 | 0 | Low-quality    | Genome-fragment | 6.13  | 0     |
| S5_vs_k141_120239  full    | 3130 | NA  | 0 | 0 | Low-quality    | Genome-fragment | 6.83  | 0     |
| S10_vs_75277  full         | 3130 | NA  | 2 | 0 | Low-quality    | Genome-fragment | 4.88  | 0     |
| S9_vs_k141_87855  full     | 3131 | NA  | 0 | 0 | Low-quality    | Genome-fragment | 7.5   | 0     |
| S10_vs_89595  full         | 3131 | NA  | 0 | 0 | Low-quality    | Genome-fragment | 7.81  | 0     |
| S16_vs_141335  H2gene      | 1149 | NA  | 0 | 1 | Not-determined | Genome-fragment | NA    | 0     |
| S6_extracted_k141_10240    | 3131 | NA  | 1 | 0 | Low-quality    | Genome-fragment | 2.27  | 0     |
| S8_extracted_k141_44915    | 3131 | NA  | 2 | 0 | Low-quality    | Genome-fragment | 16.02 | 0     |
| S1_extracted_k141_154303   | 3132 | NA  | 0 | 0 | Low-quality    | Genome-fragment | 7.08  | 0     |
| S16_vs_144083  H2gene      | 1090 | NA  | 0 | 0 | Not-determined | Genome-fragment | NA    | 0     |
| S16_vs_144100  H2gene      | 1099 | NA  | 0 | 0 | Not-determined | Genome-fragment | NA    | 0     |
| S3_vs_k141_114419  full    | 3133 | NA  | 0 | 0 | Low-quality    | Genome-fragment | 1.53  | 0     |
| S16_vs_146534  H2gene      | 2902 | NA  | 0 | 0 | Not-determined | Genome-fragment | NA    | 0     |
| S16_vs_147046  H2gene      | 2225 | NA  | 0 | 0 | Not-determined | Genome-fragment | NA    | 0     |
| S16_vs_147637  H2gene      | 1920 | NA  | 0 | 0 | Not-determined | Genome-fragment | NA    | 0     |
| S7_vs_122897  full         | 3133 | NA  | 0 | 0 | Low-quality    | Genome-fragment | 6.16  | 0     |
| S10_vs_2230  full          | 3133 | NA  | 1 | 0 | Low-quality    | Genome-fragment | 3.83  | 0     |
| S8_extracted_k141_72169    | 3133 | Yes | 1 | 1 | Low-quality    | Genome-fragment | 0.18  | 87.23 |
| S9_vs_k141_10086  full     | 3134 | NA  | 0 | 0 | Low-quality    | Genome-fragment | 9.27  | 0     |
| S5_vs_k141_43416  full     | 3135 | NA  | 1 | 0 | Low-quality    | Genome-fragment | 9.72  | 0     |
| S5_vs_k141_50041  full     | 3135 | NA  | 1 | 0 | Low-quality    | Genome-fragment | 9.71  | 0     |
| S16_vs_55853  full         | 3135 | NA  | 0 | 0 | Low-quality    | Genome-fragment | 7.5   | 0     |
| S5_extracted_k141_65199    | 3136 | NA  | 0 | 1 | Low-quality    | Genome-fragment | 6.75  | 0     |
| S7_vs_154750  H2gene       | 1362 | NA  | 0 | 1 | Not-determined | Genome-fragment | NA    | 0     |
| S7_vs_66629  full          | 3136 | NA  | 0 | 0 | Low-quality    | Genome-fragment | 8.62  | 0     |
| S12_vs_k141_13846  full    | 3136 | NA  | 0 | 3 | Low-quality    | Genome-fragment | 3.1   | 0     |
| S11_extracted_k141_43599   | 3137 | NA  | 2 | 0 | Low-quality    | Genome-fragment | 5.4   | 0     |
| S16_vs_157004  H2gene      | 1065 | NA  | 0 | 0 | Not-determined | Genome-fragment | NA    | 0     |
| S5_extracted_k141_101702   | 3137 | NA  | 4 | 0 | Low-quality    | Genome-fragment | 14.42 | 0     |
| S5_vs_k141_61918  full     | 3137 | NA  | 3 | 0 | Low-quality    | Genome-fragment | 3.95  | 0     |
| S16_vs_18935  full         | 3137 | NA  | 0 | 2 | Low-quality    | Genome-fragment | 1.46  | 0     |
| S5_extracted_k141_139065   | 3138 | NA  | 2 | 0 | Low-quality    | Genome-fragment | 8.24  | 0     |
| S5_vs_k141_143723  full    | 3138 | NA  | 2 | 0 | Low-quality    | Genome-fragment | 3.61  | 0     |
| S7_extracted_67748         | 3138 | NA  | 0 | 2 | Low-quality    | Genome-fragment | 4.06  | 0     |
| S12_extracted_k141_166519  | 3138 | NA  | 0 | 2 | Low-quality    | Genome-fragment | 2.92  | 0     |
| S5_extracted_k141_138490   | 3139 | NA  | 3 | 0 | Low-quality    | Genome-fragment | 6.83  | 0     |
| S10_extracted_28           | 1118 | NA  | 0 | 0 | Not-determined | Genome-fragment | NA    | 0     |
| S10_extracted_49           | 1730 | NA  | 0 | 1 | Not-determined | Genome-fragment | NA    | 0     |
| S10_extracted_183          | 3626 | NA  | 0 | 1 | Not-determined | Genome-fragment | NA    | 0     |
| S10_extracted_295          | 1676 | NA  | 0 | 1 | Not-determined | Genome-fragment | NA    | 0     |
| S10_extracted_312          | 1407 | NA  | 0 | 1 | Not-determined | Genome-fragment | NA    | 0     |
| S5_vs_k141_131109  full    | 3139 | NA  | 1 | 0 | Low-quality    | Genome-fragment | 5.12  | 0     |
| S10_extracted_572          | 1503 | NA  | 0 | 2 | Not-determined | Genome-fragment | NA    | 0     |
| S5_vs_k141_30292  full     | 3140 | NA  | 0 | 2 | Low-quality    | Genome-fragment | 4.52  | 0     |
| S10_extracted_836          | 1103 | NA  | 0 | 2 | Not-determined | Genome-fragment | NA    | 0     |
| S10_extracted_930          | 1770 | NA  | 0 | 1 | Not-determined | Genome-fragment | NA    | 0     |
| S10_extracted_66338        | 3140 | NA  | 0 | 1 | Low-quality    | Genome-fragment | 6.2   | 0     |
| S10_extracted_1109         | 3218 | NA  | 0 | 2 | Not-determined | Genome-fragment | NA    | 0     |
| S8_extracted_k141_43036    | 3140 | NA  | 0 | 0 | Low-quality    | Genome-fragment | 6.22  | 0     |
| S14_vs_k141_19209  full    | 3141 | NA  | 0 | 0 | Low-quality    | Genome-fragment | 6.6   | 0     |
| S10_extracted_1321         | 2975 | NA  | 0 | 1 | Not-determined | Genome-fragment | NA    | 0     |
| S10_extracted_1347         | 1231 | NA  | 0 | 1 | Not-determined | Genome-fragment | NA    | 0     |
| S5_extracted_k141_98001    | 3141 | NA  | 0 | 1 | Low-quality    | Genome-fragment | 6.57  | 0     |
| S10_extracted_1374         | 2039 | NA  | 0 | 0 | Not-determined | Genome-fragment | NA    | 0     |



|                           |        |    |    |    |                |                 |                 |    |      |
|---------------------------|--------|----|----|----|----------------|-----------------|-----------------|----|------|
| S10_extracted_3178        | 1257   | No | NA | 0  | 0              | Not-determined  | Genome-fragment | NA | 0    |
| S10_extracted_3187        | 3577   | No | NA | 0  | 2              | Not-determined  | Genome-fragment | NA | 0    |
| S5_vs_k141_696751 full    | 3146   | No | NA | 0  | 1              | Low-quality     | Genome-fragment | NA | 5.5  |
| S10_extracted_3309        | 1468   | No | NA | 0  | 3              | Not-determined  | Genome-fragment | NA | 0    |
| S10_extracted_3439        | 2526   | No | NA | 0  | 1              | Not-determined  | Genome-fragment | NA | 0    |
| S10_vs_12651 full         | 3147   | No | NA | 0  | 0              | Low-quality     | Genome-fragment | NA | 7.35 |
| S10_extracted_3588        | 10293  | No | NA | 0  | 3              | Not-determined  | Genome-fragment | NA | 0    |
| S10_extracted_3644        | 103067 | No | NA | 16 | 1              | High-quality    | High-quality    | NA | 100  |
| S10_extracted_3672        | 2046   | No | NA | 0  | 1              | Not-determined  | Genome-fragment | NA | 0    |
| S10_extracted_3811        | 2559   | No | NA | 0  | 2              | Not-determined  | Genome-fragment | NA | 0    |
| S10_extracted_3914        | 2769   | No | NA | 0  | 3              | Not-determined  | Genome-fragment | NA | 0    |
| S10_extracted_4049        | 5097   | No | NA | 0  | 4              | Not-determined  | Genome-fragment | NA | 0    |
| S10_extracted_4087        | 2084   | No | NA | 0  | 2              | Not-determined  | Genome-fragment | NA | 0    |
| S10_extracted_4183        | 3351   | No | NA | 0  | 1              | Not-determined  | Genome-fragment | NA | 0    |
| S10_extracted_4229        | 6376   | No | NA | 0  | 2              | Not-determined  | Genome-fragment | NA | 0    |
| S10_extracted_4319        | 1277   | No | NA | 0  | 2              | Not-determined  | Genome-fragment | NA | 0    |
| S8_vs_k141_218501 full    | 3147   | No | NA | 0  | 0              | Low-quality     | Genome-fragment | NA | 0.76 |
| S10_extracted_4381        | 1392   | No | NA | 0  | 1              | Not-determined  | Genome-fragment | NA | 0    |
| S1_extracted_k141_10970   | 3148   | No | NA | 0  | 2              | Low-quality     | Genome-fragment | NA | 0.46 |
| S10_extracted_4473        | 1234   | No | NA | 0  | 2              | Not-determined  | Genome-fragment | NA | 0    |
| S3_vs_k141_989551 full    | 3148   | No | NA | 1  | 0              | Low-quality     | Genome-fragment | NA | 9.56 |
| S10_extracted_4621        | 1729   | No | NA | 0  | 2              | Not-determined  | Genome-fragment | NA | 0    |
| S10_extracted_4967        | 1299   | No | NA | 0  | 0              | Not-determined  | Genome-fragment | NA | 0    |
| S10_extracted_4969        | 1192   | No | NA | 0  | 1              | Not-determined  | Genome-fragment | NA | 0    |
| S10_extracted_5005        | 2249   | No | NA | 0  | 0              | Not-determined  | Genome-fragment | NA | 0    |
| S10_extracted_5017        | 1347   | No | NA | 0  | 1              | Not-determined  | Genome-fragment | NA | 0    |
| S10_extracted_5056        | 1700   | No | NA | 0  | 1              | Not-determined  | Genome-fragment | NA | 0    |
| S10_extracted_5122        | 5275   | No | NA | 0  | 5              | Not-determined  | Genome-fragment | NA | 0    |
| S10_extracted_5129        | 4375   | No | NA | 0  | 2              | Not-determined  | Genome-fragment | NA | 0    |
| S10_extracted_5149        | 1161   | No | NA | 0  | 0              | Not-determined  | Genome-fragment | NA | 0    |
| S10_extracted_5199        | 1044   | No | NA | 0  | 1              | Not-determined  | Genome-fragment | NA | 0    |
| S10_extracted_5207        | 7388   | No | NA | 0  | 7              | Not-determined  | Genome-fragment | NA | 0    |
| S10_extracted_5208        | 8663   | No | NA | 0  | 3              | Not-determined  | Genome-fragment | NA | 0    |
| S10_extracted_5222        | 2807   | No | NA | 0  | 0              | Not-determined  | Genome-fragment | NA | 0    |
| S10_extracted_5352        | 1285   | No | NA | 0  | 1              | Not-determined  | Genome-fragment | NA | 0    |
| S10_extracted_5394        | 3444   | No | NA | 0  | 2              | Not-determined  | Genome-fragment | NA | 0    |
| S10_extracted_5401        | 1110   | No | NA | 0  | 2              | Not-determined  | Genome-fragment | NA | 0    |
| S10_extracted_5403        | 7616   | No | NA | 0  | 4              | Not-determined  | Genome-fragment | NA | 0    |
| S10_extracted_5411        | 5802   | No | NA | 4  | Not-determined | Genome-fragment | Genome-fragment | NA | 0    |
| S7_vs_930961 full         | 3148   | No | NA | 3  | 0              | Low-quality     | Genome-fragment | NA | 4.84 |
| S16_extracted_93048       | 3148   | No | NA | 2  | 0              | Low-quality     | Genome-fragment | NA | 7.56 |
| S10_extracted_5506        | 3026   | No | NA | 0  | 1              | Not-determined  | Genome-fragment | NA | 0    |
| S16_extracted_96513       | 3148   | No | NA | 0  | 3              | Low-quality     | Genome-fragment | NA | 1.16 |
| S8_vs_k141_202671 full    | 3148   | No | NA | 0  | 0              | Low-quality     | Genome-fragment | NA | 8.78 |
| S10_extracted_5667        | 1790   | No | NA | 0  | 2              | Not-determined  | Genome-fragment | NA | 0    |
| S10_extracted_5727        | 1092   | No | NA | 0  | 1              | Not-determined  | Genome-fragment | NA | 0    |
| S10_extracted_5762        | 5404   | No | NA | 0  | 4              | Not-determined  | Genome-fragment | NA | 0    |
| S10_extracted_5777        | 1281   | No | NA | 0  | 0              | Not-determined  | Genome-fragment | NA | 0    |
| S10_extracted_5877        | 3370   | No | NA | 0  | 1              | Not-determined  | Genome-fragment | NA | 0    |
| S10_extracted_5920        | 3343   | No | NA | 0  | 1              | Not-determined  | Genome-fragment | NA | 0    |
| S10_extracted_5938        | 1321   | No | NA | 0  | 0              | Not-determined  | Genome-fragment | NA | 0    |
| S10_extracted_6050        | 2062   | No | NA | 0  | 1              | Not-determined  | Genome-fragment | NA | 0    |
| S10_extracted_6231        | 2408   | No | NA | 0  | 0              | Not-determined  | Genome-fragment | NA | 0    |
| S9_extracted_k141_66769   | 3149   | No | NA | 0  | 0              | Low-quality     | Genome-fragment | NA | 1.86 |
| S14_vs_k141_738961 full   | 3149   | No | NA | 3  | 0              | Low-quality     | Genome-fragment | NA | 7.59 |
| S7_extracted_136128       | 3149   | No | NA | 0  | 1              | Low-quality     | Genome-fragment | NA | 6.38 |
| S10_extracted_6430        | 1069   | No | NA | 0  | 0              | Not-determined  | Genome-fragment | NA | 0    |
| S10_vs_20541 full         | 3149   | No | NA | 1  | 0              | Low-quality     | Genome-fragment | NA | 6.31 |
| S10_extracted_6491        | 3187   | No | NA | 1  | 1              | Not-determined  | Genome-fragment | NA | 0    |
| S10_extracted_6498        | 3444   | No | NA | 0  | 2              | Not-determined  | Genome-fragment | NA | 0    |
| S10_extracted_6603        | 3728   | No | NA | 0  | 2              | Not-determined  | Genome-fragment | NA | 0    |
| S10_extracted_6758        | 6259   | No | NA | 0  | 4              | Not-determined  | Genome-fragment | NA | 0    |
| S10_extracted_6765        | 1727   | No | NA | 0  | 0              | Not-determined  | Genome-fragment | NA | 0    |
| S12_extracted_k141_34743  | 3149   | No | NA | 0  | 4              | Low-quality     | Genome-fragment | NA | 4.59 |
| S10_extracted_6851        | 7908   | No | NA | 2  | 2              | Not-determined  | Genome-fragment | NA | 0    |
| S16_extracted_6886        | 1639   | No | NA | 0  | 0              | Not-determined  | Genome-fragment | NA | 0    |
| S10_extracted_7024        | 1495   | No | NA | 0  | 0              | Not-determined  | Genome-fragment | NA | 0    |
| S10_extracted_7056        | 1477   | No | NA | 0  | 1              | Not-determined  | Genome-fragment | NA | 0    |
| S10_extracted_7209        | 1062   | No | NA | 0  | 0              | Not-determined  | Genome-fragment | NA | 0    |
| S10_extracted_7302        | 1408   | No | NA | 0  | 1              | Not-determined  | Genome-fragment | NA | 0    |
| S10_extracted_7329        | 2003   | No | NA | 0  | 1              | Not-determined  | Genome-fragment | NA | 0    |
| S10_extracted_7336        | 1092   | No | NA | 0  | 0              | Not-determined  | Genome-fragment | NA | 0    |
| S11_vs_k141_691391 full   | 3150   | No | NA | 1  | 0              | Low-quality     | Genome-fragment | NA | 3.44 |
| S5_vs_k141_702881 full    | 3150   | No | NA | 2  | 0              | Low-quality     | Genome-fragment | NA | 7.49 |
| S8_extracted_k141_201134  | 3150   | No | NA | 1  | 1              | Low-quality     | Genome-fragment | NA | 0.88 |
| S10_extracted_7509        | 4619   | No | NA | 0  | 2              | Not-determined  | Genome-fragment | NA | 0    |
| S10_extracted_7644        | 1001   | No | NA | 0  | 1              | Not-determined  | Genome-fragment | NA | 0    |
| S10_extracted_7665        | 4415   | No | NA | 0  | 2              | Not-determined  | Genome-fragment | NA | 0    |
| S10_extracted_7782        | 10421  | No | NA | 5  | 2              | Not-determined  | Genome-fragment | NA | 0    |
| S10_extracted_8118        | 3169   | No | NA | 0  | 1              | Not-determined  | Genome-fragment | NA | 0    |
| S10_vs_245431 full        | 3151   | No | NA | 2  | 0              | Low-quality     | Genome-fragment | NA | 7.95 |
| S10_extracted_8318        | 1008   | No | NA | 1  | 1              | Not-determined  | Genome-fragment | NA | 0    |
| S8_extracted_k141_182540  | 3151   | No | NA | 0  | 0              | Low-quality     | Genome-fragment | NA | 3.51 |
| S10_extracted_8552        | 1046   | No | NA | 0  | 1              | Not-determined  | Genome-fragment | NA | 5.5  |
| S1_extracted_k141_89033   | 3152   | No | NA | 0  | 2              | Low-quality     | Genome-fragment | NA | 0    |
| S10_extracted_8579        | 1875   | No | NA | 0  | 0              | Not-determined  | Genome-fragment | NA | 0    |
| S1_vs_k141_177971 full    | 3152   | No | NA | 3  | 0              | Low-quality     | Genome-fragment | NA | 7.38 |
| S15_extracted_7265        | 3152   | No | NA | 1  | 0              | Low-quality     | Genome-fragment | NA | 2.31 |
| S10_extracted_8798        | 5133   | No | NA | 0  | 0              | Not-determined  | Genome-fragment | NA | 0    |
| S10_extracted_8833        | 1957   | No | NA | 0  | 0              | Not-determined  | Genome-fragment | NA | 0    |
| S10_extracted_8860        | 3278   | No | NA | 0  | 0              | Not-determined  | Genome-fragment | NA | 5.97 |
| S8_vs_k141_122912 full    | 3152   | No | NA | 0  | 0              | Low-quality     | Genome-fragment | NA | 8.89 |
| S16_extracted_136639      | 3153   | No | NA | 0  | 2              | Low-quality     | Genome-fragment | NA | 0.85 |
| S10_extracted_38259       | 3153   | No | NA | 0  | 3              | Low-quality     | Genome-fragment | NA | 0    |
| S10_extracted_9046        | 1081   | No | NA | 0  | 1              | Not-determined  | Genome-fragment | NA | 0    |
| S10_extracted_9105        | 1086   | No | NA | 0  | 0              | Not-determined  | Genome-fragment | NA | 0    |
| S10_extracted_9144        | 1171   | No | NA | 0  | 0              | Not-determined  | Genome-fragment | NA | 0    |
| S11_extracted_k141_48868  | 3154   | No | NA | 2  | 0              | Low-quality     | Genome-fragment | NA | 6.47 |
| S3_vs_k141_198271 full    | 3155   | No | NA | 0  | 0              | Low-quality     | Genome-fragment | NA | 2.06 |
| S5_vs_k141_361351 full    | 3155   | No | NA | 0  | 2              | Low-quality     | Genome-fragment | NA | 2.85 |
| S10_extracted_9452        | 1042   | No | NA | 0  | 1              | Not-determined  | Genome-fragment | NA | 0    |
| S10_extracted_9502        | 4273   | No | NA | 0  | 2              | Not-determined  | Genome-fragment | NA | 0    |
| S10_extracted_9613        | 1078   | No | NA | 0  | 0              | Not-determined  | Genome-fragment | NA | 0    |
| S16_vs_1701231 full       | 3155   | No | NA | 0  | 3              | Low-quality     | Genome-fragment | NA | 3.98 |
| S10_extracted_9670        | 3862   | No | NA | 0  | 2              | Not-determined  | Genome-fragment | NA | 0    |
| S10_extracted_9703        | 1410   | No | NA | 0  | 1              | Not-determined  | Genome-fragment | NA | 0    |
| S10_extracted_9709        | 1072   | No | NA | 0  | 1              | Not-determined  | Genome-fragment | NA | 0    |
| S10_extracted_9780        | 3103   | No | NA | 0  | 0              | Not-determined  | Genome-fragment | NA | 5.43 |
| S1_extracted_k141_98135   | 3156   | No | NA | 0  | 0              | Low-quality     | Genome-fragment | NA | 0    |
| S10_extracted_9898        | 1149   | No | NA | 0  | 1              | Not-determined  | Genome-fragment | NA | 0    |
| S10_extracted_10031       | 2068   | No | NA | 0  | 1              | Not-determined  | Genome-fragment | NA | 0    |
| S10_extracted_10138       | 1786   | No | NA | 0  | 0              | Not-determined  | Genome-fragment | NA | 0    |
| S10_extracted_10243       | 1234   | No | NA | 0  | 0              | Not-determined  | Genome-fragment | NA | 0    |
| S10_extracted_10401       | 1259   | No | NA | 0  | 0              | Not-determined  | Genome-fragment | NA | 0    |
| S10_extracted_10417       | 2138   | No | NA | 0  | 0              | Not-determined  | Genome-fragment | NA | 0    |
| S10_extracted_10503       | 3368   | No | NA | 0  | 3              | Not-determined  | Genome-fragment | NA | 0    |
| S10_extracted_10518       | 1448   | No | NA | 0  | 1              | Not-determined  | Genome-fragment | NA | 0    |
| S10_extracted_10521       | 2495   | No | NA | 0  | 3              | Not-determined  | Genome-fragment | NA | 0    |
| S10_extracted_10656       | 1212   | No | NA | 0  | 0              | Not-determined  | Genome-fragment | NA | 2.26 |
| S3_vs_k141_907911 full    | 3156   | No | NA | 0  | 1              | Low-quality     | Genome-fragment | NA | 0    |
| S10_extracted_10879       | 2439   | No | NA | 0  | 0              | Not-determined  | Genome-fragment | NA | 0    |
| S10_extracted_10885       | 1233   | No | NA | 0  | 1              | Not-determined  | Genome-fragment | NA | 0    |
| S10_extracted_10904       | 1094   | No | NA | 0  | 2              | Not-determined  | Genome-fragment | NA | 0    |
| S10_extracted_11076       | 2353   | No | NA | 0  | 3              | Not-determined  | Genome-fragment | NA | 0    |
| S10_extracted_11128       | 2219   | No | NA | 0  | 1              | Not-determined  | Genome-fragment | NA | 0    |
| S10_extracted_11232       | 1231   | No | NA | 0  | 1              | Not-determined  | Genome-fragment | NA | 0    |
| S10_extracted_11283       | 1477   | No | NA | 0  | 1              | Not-determined  | Genome-fragment | NA | 0    |
| S12_extracted_k141_56430  | 3156   | No | NA | 6  | Low-quality    | Genome-fragment | Genome-fragment | NA | 1.02 |
| S10_extracted_11342       | 1141   | No | NA | 0  | 2              | Not-determined  | Genome-fragment | NA | 0    |
| S10_extracted_11357       | 4068   | No | NA | 0  | 6              | Not-determined  | Genome-fragment | NA | 0    |
| S10_extracted_11375       | 1315   | No | NA | 0  | 1              | Not-determined  | Genome-fragment | NA | 1.71 |
| S8_extracted_k141_17217   | 3156   | No | NA | 0  | 1              | Low-quality     | Genome-fragment | NA | 2.03 |
| S7_extracted_76819        | 3157   | No | NA | 1  | 0              | Low-quality     | Genome-fragment | NA | 0    |
| S10_extracted_11550       | 1003   | No | NA | 0  | 1              | Not-determined  | Genome-fragment | NA | 8.65 |
| S10_extracted_11627       | 1332   | No | NA | 0  | 0              | Not-determined  | Genome-fragment | NA | 0    |
| S10_extracted_11715       | 2369   | No | NA | 0  | 4              | Not-determined  | Genome-fragment | NA | 0    |
| S7_vs_212081 full         | 3157   | No | NA | 0  | 0              | Low-quality     | Genome-fragment | NA | 7.74 |
| S10_extracted_11815       | 3331   | No | NA | 0  | 3              | Not-determined  | Genome-fragment | NA | 0    |
| S10_extracted_11901       | 1843   | No | NA | 0  | 1              | Not-determined  | Genome-fragment | NA | 0    |
| S7_vs_293491 full         | 3157   | No | NA | 2  | 0              | Low-quality     | Genome-fragment | NA | 0    |
| S10_extracted_12002       | 1477   | No | NA | 0  | 1              | Not-determined  | Genome-fragment | NA | 0    |
| S10_extracted_12047       | 1845   | No | NA | 0  | 3              | Not-determined  | Genome-fragment | NA | 0    |
| S10_extracted_12092       | 1049   | No | NA | 0  | 1              | Not-determined  | Genome-fragment | NA | 2.9  |
| S12_extracted_k141_179654 | 3157   | No | NA | 2  | 0              | Low-quality     | Genome-fragment | NA | 7.24 |
| S10_extracted_12142       | 8200   | No | NA | 4  | Not-determined | Genome-fragment | Genome-fragment | NA | 0    |
| S12_vs_k141_380041 full   | 3157   | No | NA | 3  | 0              | Low-quality     | Genome-fragment | NA | 0    |
| S10_extracted_12348       | 4294   | No | NA | 0  | 3              | Not-determined  | Genome-fragment | NA | 0    |
| S10_extracted_12418       | 6518   | No | NA | 0  | 0              | Not-determined  | Genome-fragment | NA | 0    |
| S10_extracted_12520       | 1273   | No | NA | 0  | 1              | Not-determined  | Genome-fragment | NA | 0    |
| S10_extracted_12536       | 1062   | No | NA | 0  | 1              | Not-determined  | Genome-fragment | NA | 0    |
| S10_extracted_12710       | 8543   | No | NA | 0  | 4              | Not-determined  | Genome-fragment | NA | 0    |



|                           |       |     |      |    |                |                 |                 |       |   |
|---------------------------|-------|-----|------|----|----------------|-----------------|-----------------|-------|---|
| S5_vs_k141_80514  full    | 3162  | No  | NA   | 0  | 2              | Low-quality     | Genome-fragment | 1.65  | 0 |
| S14_vs_k141_46048  full   | 3164  | No  | NA   | 0  | 4              | Low-quality     | Genome-fragment | 0.84  | 0 |
| S10_extracted_14049       | 1368  | No  | NA   | 0  | 0              | Not-determined  | Genome-fragment | NA    | 0 |
| S10_extracted_14072       | 2674  | No  | NA   | 0  | 1              | Not-determined  | Genome-fragment | NA    | 0 |
| S10_extracted_14330       | 2418  | No  | NA   | 0  | 1              | Not-determined  | Genome-fragment | NA    | 0 |
| S10_extracted_14359       | 1903  | No  | NA   | 0  | 1              | Not-determined  | Genome-fragment | NA    | 0 |
| S10_extracted_14464       | 5046  | No  | NA   | 0  | 2              | Not-determined  | Genome-fragment | NA    | 0 |
| S14_vs_k141_11132  full   | 3164  | No  | NA   | 0  | 1              | Low-quality     | Genome-fragment | 11.19 | 0 |
| S10_extracted_14481       | 5969  | No  | NA   | 0  | 3              | Not-determined  | Genome-fragment | NA    | 0 |
| S10_extracted_14670       | 1278  | No  | NA   | 0  | 2              | Not-determined  | Genome-fragment | NA    | 0 |
| S1_vs_k141_36314  full    | 3164  | No  | NA   | 2  | 0              | Low-quality     | Genome-fragment | 7.63  | 0 |
| S10_extracted_14820       | 1228  | No  | NA   | 0  | 2              | Not-determined  | Genome-fragment | NA    | 0 |
| S10_extracted_14882       | 2807  | No  | NA   | 0  | 1              | Not-determined  | Genome-fragment | NA    | 0 |
| S10_extracted_15147       | 1022  | No  | NA   | 0  | 0              | Not-determined  | Genome-fragment | NA    | 0 |
| S10_extracted_15166       | 3956  | No  | NA   | 0  | 7              | Not-determined  | Genome-fragment | NA    | 0 |
| S10_extracted_15309       | 1082  | No  | NA   | 0  | 0              | Not-determined  | Genome-fragment | NA    | 0 |
| S7_extracted_18708        | 3164  | No  | NA   | 0  | 0              | Low-quality     | Genome-fragment | 6.69  | 0 |
| S10_extracted_15412       | 1554  | No  | NA   | 0  | 0              | Not-determined  | Genome-fragment | NA    | 0 |
| S16_extracted_146127      | 3164  | No  | NA   | 0  | 2              | Low-quality     | Genome-fragment | 7.33  | 0 |
| S10_extracted_15525       | 1320  | No  | NA   | 0  | 0              | Not-determined  | Genome-fragment | NA    | 0 |
| S10_extracted_15558       | 2463  | No  | NA   | 0  | 2              | Not-determined  | Genome-fragment | NA    | 0 |
| S10_extracted_15695       | 2155  | No  | NA   | 0  | 1              | Not-determined  | Genome-fragment | NA    | 0 |
| S8_extracted_k141_84852   | 3164  | No  | NA   | 0  | 0              | Low-quality     | Genome-fragment | 5.75  | 0 |
| S10_extracted_15882       | 1081  | No  | NA   | 0  | 1              | Not-determined  | Genome-fragment | NA    | 0 |
| S5_vs_k141_91708  full    | 3165  | No  | NA   | 2  | 0              | Low-quality     | Genome-fragment | 5.55  | 0 |
| S16_vs_150762  full       | 3165  | No  | NA   | 0  | 2              | Low-quality     | Genome-fragment | 2.62  | 0 |
| S10_extracted_15997       | 1289  | No  | NA   | 0  | 0              | Not-determined  | Genome-fragment | NA    | 0 |
| S6_vs_k141_32313  full    | 3165  | No  | NA   | 2  | 0              | Low-quality     | Genome-fragment | 7.05  | 0 |
| S10_extracted_16164       | 1099  | No  | NA   | 0  | 0              | Not-determined  | Genome-fragment | NA    | 0 |
| S10_extracted_16314       | 1027  | No  | NA   | 0  | 0              | Not-determined  | Genome-fragment | NA    | 0 |
| S11_vs_k141_79453  full   | 3166  | No  | NA   | 2  | 0              | Low-quality     | Genome-fragment | 4.63  | 0 |
| S8_vs_k141_31043  full    | 3166  | No  | 1033 | 1  | Low-quality    | Genome-fragment | 1.61            | 67.37 |   |
| S10_extracted_16652       | 1047  | No  | NA   | 0  | 0              | Not-determined  | Genome-fragment | NA    | 0 |
| S11_vs_k141_30770  full   | 3167  | No  | NA   | 0  | 0              | Low-quality     | Genome-fragment | 6.27  | 0 |
| S7_vs_11701  full         | 3167  | No  | NA   | 1  | 0              | Low-quality     | Genome-fragment | 2.27  | 0 |
| S10_extracted_16871       | 4350  | No  | NA   | 1  | Not-determined | Genome-fragment | NA              | 0     |   |
| S9_extracted_k141_81005   | 3169  | No  | NA   | 1  | 0              | Low-quality     | Genome-fragment | 7.86  | 0 |
| S10_extracted_17020       | 5441  | No  | NA   | 0  | 2              | Not-determined  | Genome-fragment | NA    | 0 |
| S10_extracted_17108       | 1367  | No  | NA   | 0  | 0              | Not-determined  | Genome-fragment | NA    | 0 |
| S4_extracted_13223        | 3169  | No  | NA   | 0  | 0              | Low-quality     | Genome-fragment | 1.74  | 0 |
| S10_extracted_17274       | 2368  | No  | NA   | 0  | 1              | Not-determined  | Genome-fragment | NA    | 0 |
| S10_extracted_17465       | 3124  | No  | NA   | 0  | 1              | Not-determined  | Genome-fragment | NA    | 0 |
| S10_extracted_17493       | 6843  | No  | NA   | 0  | 3              | Not-determined  | Genome-fragment | NA    | 0 |
| S10_extracted_17543       | 1549  | No  | NA   | 0  | 0              | Not-determined  | Genome-fragment | NA    | 0 |
| S10_extracted_17634       | 1458  | No  | NA   | 0  | 1              | Not-determined  | Genome-fragment | NA    | 0 |
| S13_vs_113527  full       | 3171  | No  | NA   | 0  | 2              | Low-quality     | Genome-fragment | 2.91  | 0 |
| S10_extracted_17722       | 1882  | No  | NA   | 0  | 2              | Not-determined  | Genome-fragment | NA    | 0 |
| S10_extracted_17756       | 1916  | No  | NA   | 0  | 0              | Not-determined  | Genome-fragment | NA    | 0 |
| S5_extracted_k141_129061  | 3172  | No  | NA   | 0  | 2              | Low-quality     | Genome-fragment | 1.01  | 0 |
| S10_extracted_17858       | 3115  | No  | NA   | 0  | 1              | Not-determined  | Genome-fragment | NA    | 0 |
| S10_extracted_17941       | 1077  | No  | NA   | 0  | 2              | Not-determined  | Genome-fragment | NA    | 0 |
| S10_extracted_18024       | 3481  | No  | NA   | 0  | 2              | Not-determined  | Genome-fragment | NA    | 0 |
| S10_vs_19260  full        | 3172  | No  | NA   | 0  | 1              | Low-quality     | Genome-fragment | 0.54  | 0 |
| S10_extracted_18168       | 1074  | No  | NA   | 0  | 0              | Not-determined  | Genome-fragment | NA    | 0 |
| S10_extracted_18199       | 1276  | No  | NA   | 0  | 1              | Not-determined  | Genome-fragment | NA    | 0 |
| S10_extracted_18237       | 1897  | No  | NA   | 0  | 2              | Not-determined  | Genome-fragment | NA    | 0 |
| S10_extracted_18472       | 1013  | No  | NA   | 0  | 0              | Not-determined  | Genome-fragment | NA    | 0 |
| S10_extracted_18502       | 1084  | No  | NA   | 0  | 1              | Not-determined  | Genome-fragment | NA    | 0 |
| S10_extracted_18513       | 3473  | No  | NA   | 0  | 0              | Not-determined  | Genome-fragment | NA    | 0 |
| S10_extracted_18579       | 9215  | No  | NA   | 0  | 3              | Not-determined  | Genome-fragment | NA    | 0 |
| S10_extracted_18621       | 1894  | No  | NA   | 0  | 2              | Not-determined  | Genome-fragment | NA    | 0 |
| S10_extracted_18671       | 44897 | No  | NA   | 12 | 1              | Complete        | High-quality    | 100   | 0 |
| S12_extracted_k141_142216 | 3172  | No  | NA   | 0  | 2              | Low-quality     | Genome-fragment | 1.4   | 0 |
| S10_extracted_18692       | 1681  | No  | NA   | 0  | 0              | Not-determined  | Genome-fragment | NA    | 0 |
| S12_vs_k141_143629  full  | 3173  | Yes | 1374 | 1  | Low-quality    | Genome-fragment | 0.94            | 56.7  |   |
| S10_extracted_18767       | 3357  | No  | NA   | 0  | 2              | Not-determined  | Genome-fragment | NA    | 0 |
| S10_extracted_18782       | 1347  | No  | NA   | 0  | 2              | Not-determined  | Genome-fragment | NA    | 0 |
| S10_extracted_18810       | 3628  | No  | NA   | 0  | 1              | Not-determined  | Genome-fragment | NA    | 0 |
| S10_extracted_18909       | 1486  | No  | NA   | 0  | 0              | Not-determined  | Genome-fragment | NA    | 0 |
| S6_extracted_k141_18954   | 3173  | No  | NA   | 2  | 0              | Low-quality     | Genome-fragment | 3.41  | 0 |
| S10_extracted_18945       | 5668  | No  | NA   | 0  | 4              | Not-determined  | Genome-fragment | NA    | 0 |
| S6_extracted_k141_45095   | 3173  | No  | NA   | 0  | 0              | Low-quality     | Genome-fragment | 4.79  | 0 |
| S10_extracted_19039       | 1227  | No  | NA   | 0  | 0              | Not-determined  | Genome-fragment | NA    | 0 |
| S10_extracted_19062       | 1051  | No  | NA   | 0  | 0              | Not-determined  | Genome-fragment | NA    | 0 |
| S10_extracted_19201       | 1214  | No  | NA   | 0  | 2              | Not-determined  | Genome-fragment | NA    | 0 |
| S10_extracted_19225       | 1222  | No  | NA   | 0  | 0              | Not-determined  | Genome-fragment | NA    | 0 |
| S7_extracted_28931        | 3174  | No  | NA   | 0  | 1              | Low-quality     | Genome-fragment | 8.13  | 0 |
| S10_extracted_19299       | 3696  | No  | NA   | 0  | 1              | Not-determined  | Genome-fragment | NA    | 0 |
| S10_extracted_19319       | 1811  | No  | NA   | 0  | 0              | Not-determined  | Genome-fragment | NA    | 0 |
| S16_vs_16690  full        | 3174  | No  | NA   | 2  | 0              | Low-quality     | Genome-fragment | 8.77  | 0 |
| S10_extracted_19564       | 2262  | No  | NA   | 0  | 0              | Not-determined  | Genome-fragment | NA    | 0 |
| S10_extracted_19623       | 1521  | No  | NA   | 0  | 3              | Not-determined  | Genome-fragment | NA    | 0 |
| S10_extracted_19698       | 3350  | No  | NA   | 0  | 2              | Not-determined  | Genome-fragment | NA    | 0 |
| S10_extracted_19720       | 1632  | No  | NA   | 0  | 0              | Not-determined  | Genome-fragment | NA    | 0 |
| S10_extracted_19762       | 1664  | No  | NA   | 0  | 3              | Not-determined  | Genome-fragment | NA    | 0 |
| S10_extracted_19764       | 1016  | No  | NA   | 0  | 0              | Not-determined  | Genome-fragment | NA    | 0 |
| S7_extracted_25773        | 3175  | No  | NA   | 1  | 0              | Low-quality     | Genome-fragment | 6.33  | 0 |
| S16_extracted_13072       | 3175  | No  | NA   | 0  | 4              | Low-quality     | Genome-fragment | 5.87  | 0 |
| S10_extracted_20265       | 3175  | No  | NA   | 0  | 0              | Low-quality     | Genome-fragment | 3.95  | 0 |
| S10_extracted_19910       | 1185  | No  | NA   | 0  | 1              | Not-determined  | Genome-fragment | NA    | 0 |
| S16_extracted_24960       | 3176  | No  | NA   | 0  | 1              | Low-quality     | Genome-fragment | 6.57  | 0 |
| S10_extracted_20136       | 1329  | No  | NA   | 0  | 0              | Not-determined  | Genome-fragment | NA    | 0 |
| S10_extracted_20319       | 1292  | No  | NA   | 0  | 0              | Not-determined  | Genome-fragment | NA    | 0 |
| S10_extracted_20321       | 1414  | No  | NA   | 0  | 2              | Not-determined  | Genome-fragment | NA    | 0 |
| S10_extracted_20333       | 1025  | No  | NA   | 0  | 0              | Not-determined  | Genome-fragment | NA    | 0 |
| S10_extracted_20347       | 1010  | No  | NA   | 0  | 1              | Not-determined  | Genome-fragment | NA    | 0 |
| S10_extracted_20353       | 6284  | No  | NA   | 0  | 2              | Not-determined  | Genome-fragment | NA    | 0 |
| S10_extracted_20563       | 6958  | No  | NA   | 0  | 2              | Not-determined  | Genome-fragment | NA    | 0 |
| S10_extracted_20621       | 2415  | No  | NA   | 0  | 2              | Not-determined  | Genome-fragment | NA    | 0 |
| S12_vs_k141_110381  full  | 3176  | No  | NA   | 1  | 0              | Low-quality     | Genome-fragment | 7.73  | 0 |
| S10_extracted_20714       | 3225  | No  | NA   | 0  | 2              | Not-determined  | Genome-fragment | NA    | 0 |
| S8_extracted_k141_21477   | 3176  | No  | NA   | 0  | 1              | Low-quality     | Genome-fragment | 6.39  | 0 |
| S8_vs_k141_109296  full   | 3176  | No  | NA   | 1  | 0              | Low-quality     | Genome-fragment | 5.39  | 0 |
| S17_vs_k141_16453  full   | 3178  | No  | NA   | 0  | 1              | Low-quality     | Genome-fragment | 3.4   | 0 |
| S11_vs_k141_59111  full   | 3178  | No  | NA   | 0  | 0              | Low-quality     | Genome-fragment | 8.25  | 0 |
| S10_extracted_21096       | 3198  | No  | NA   | 0  | 3              | Not-determined  | Genome-fragment | NA    | 0 |
| S10_extracted_21097       | 1430  | No  | NA   | 0  | 1              | Not-determined  | Genome-fragment | NA    | 0 |
| S10_extracted_21272       | 1695  | No  | NA   | 0  | 2              | Not-determined  | Genome-fragment | NA    | 0 |
| S16_vs_164617  full       | 3178  | No  | NA   | 0  | 0              | Low-quality     | Genome-fragment | 9.24  | 0 |
| S3_vs_k141_107529  full   | 3179  | No  | NA   | 0  | 0              | Low-quality     | Genome-fragment | 7.99  | 0 |
| S5_extracted_k141_23628   | 3179  | No  | NA   | 0  | 0              | Low-quality     | Genome-fragment | 5.6   | 0 |
| S11_extracted_k141_52784  | 3180  | No  | NA   | 0  | 0              | Low-quality     | Genome-fragment | NA    | 0 |
| S10_extracted_21921       | 1203  | No  | NA   | 0  | 1              | Not-determined  | Genome-fragment | NA    | 0 |
| S10_extracted_22058       | 1369  | No  | NA   | 0  | 2              | Not-determined  | Genome-fragment | NA    | 0 |
| S3_extracted_k141_97958   | 3180  | No  | NA   | 2  | 0              | Low-quality     | Genome-fragment | 5.67  | 0 |
| S5_extracted_k141_65156   | 3180  | No  | NA   | 3  | 0              | Low-quality     | Genome-fragment | 7.89  | 0 |
| S10_extracted_22190       | 3676  | No  | NA   | 0  | 2              | Not-determined  | Genome-fragment | NA    | 0 |
| S12_vs_k141_171746  full  | 3180  | No  | NA   | 0  | 1              | Low-quality     | Genome-fragment | 1.05  | 0 |
| S10_extracted_22215       | 4745  | No  | NA   | 0  | 4              | Not-determined  | Genome-fragment | NA    | 0 |
| S17_extracted_k141_7201   | 3181  | No  | NA   | 2  | 0              | Low-quality     | Genome-fragment | 4.9   | 0 |
| S10_extracted_22231       | 1243  | No  | NA   | 0  | 4              | Not-determined  | Genome-fragment | NA    | 0 |
| S14_extracted_k141_11287  | 3181  | No  | NA   | 0  | 0              | Low-quality     | Genome-fragment | 1.85  | 0 |
| S10_extracted_22329       | 3279  | No  | NA   | 0  | 4              | Not-determined  | Genome-fragment | NA    | 0 |
| S10_extracted_22442       | 2218  | No  | NA   | 0  | 3              | Not-determined  | Genome-fragment | NA    | 0 |
| S7_extracted_201455       | 3181  | No  | NA   | 0  | 0              | Low-quality     | Genome-fragment | 2.15  | 0 |
| S8_vs_k141_194173  full   | 3181  | No  | NA   | 0  | 1              | Low-quality     | Genome-fragment | 4.33  | 0 |
| S10_extracted_22565       | 3266  | No  | NA   | 0  | 2              | Not-determined  | Genome-fragment | NA    | 0 |
| S10_extracted_22650       | 1189  | No  | NA   | 0  | 1              | Not-determined  | Genome-fragment | NA    | 0 |
| S10_extracted_22719       | 3211  | No  | NA   | 0  | 0              | Not-determined  | Genome-fragment | NA    | 0 |
| S10_extracted_22740       | 1345  | No  | NA   | 0  | 0              | Not-determined  | Genome-fragment | NA    | 0 |
| S10_extracted_22906       | 1894  | No  | NA   | 0  | 1              | Not-determined  | Genome-fragment | NA    | 0 |
| S10_extracted_22918       | 1828  | No  | NA   | 0  | 2              | Not-determined  | Genome-fragment | NA    | 0 |
| S10_extracted_22952       | 1377  | No  | NA   | 0  | 1              | Not-determined  | Genome-fragment | NA    | 0 |
| S10_extracted_23212       | 1094  | No  | NA   | 0  | 0              | Not-determined  | Genome-fragment | NA    | 0 |
| S10_extracted_23225       | 4036  | No  | NA   | 0  | 3              | Not-determined  | Genome-fragment | NA    | 0 |
| S16_vs_94911  full        | 3182  | No  | NA   | 3  | 0              | Low-quality     | Genome-fragment | 7.8   | 0 |
| S10_extracted_23274       | 4888  | No  | NA   | 0  | 3              | Not-determined  | Genome-fragment | NA    | 0 |
| S10_vs_k1419  full        | 3182  | No  | NA   | 0  | 0              | Low-quality     | Genome-fragment | 4.81  | 0 |
| S10_extracted_23352       | 1608  | No  | NA   | 0  | 1              | Not-determined  | Genome-fragment | NA    | 0 |
| S10_extracted_23515       | 1575  | No  | NA   | 0  | 1              | Not-determined  | Genome-fragment | NA    | 0 |
| S10_extracted_23581       | 2266  | No  | NA   | 0  | 1              | Not-determined  | Genome-fragment | NA    | 0 |
| S10_extracted_23595       | 5956  | No  | NA   | 0  | 3              | Not-determined  | Genome-fragment | NA    | 0 |
| S9_vs_k141_48212  full    | 3183  | No  | NA   | 1  | 0              | Low-quality     | Genome-fragment | 1.36  | 0 |
| S11_extracted_k141_109688 | 3183  | No  | NA   | 0  | 0              | Low-quality     | Genome-fragment | 2.07  | 0 |
| S12_vs_k141_78851  full   | 3183  | No  | NA   | 0  | 1              | Low-quality     | Genome-fragment | 0.87  | 0 |
| S10_extracted_23909       | 1188  | No  | NA   | 0  | 1              | Not-determined  | Genome-fragment | NA    | 0 |
| S7_vs_109161  102gene     | 3185  | No  | NA   | 1  | 0              | Low-quality     | Genome-fragment | 6.07  | 0 |
| S10_extracted_24022       | 3516  | No  | NA   | 0  | 0              | Not-determined  | Genome-fragment | NA    | 0 |
| S10_extracted_24048       | 1190  | No  | NA   | 0  | 0              | Not-determined  | Genome-fragment | NA    | 0 |
| S10_extracted_24098       | 3106  | No  | NA   | 0  |                |                 |                 |       |   |



|                           |       |    |    |    |   |                |                 |    |       |
|---------------------------|-------|----|----|----|---|----------------|-----------------|----|-------|
| S10_extracted_26022       | 5528  | No | NA | 0  | 2 | Not-determined | Genome-fragment | NA | 0     |
| S10_extracted_26095       | 1673  | No | NA | 0  | 1 | Not-determined | Genome-fragment | NA | 0     |
| S10_extracted_26125       | 1971  | No | NA | 0  | 0 | Not-determined | Genome-fragment | NA | 0     |
| S10_extracted_26185       | 3711  | No | NA | 0  | 0 | Not-determined | Genome-fragment | NA | 0     |
| S10_extracted_26188       | 1254  | No | NA | 0  | 0 | Not-determined | Genome-fragment | NA | 0     |
| S16_vs_179401  full       | 3189  | No | NA | 0  | 3 | Low-quality    | Genome-fragment | NA | 2.57  |
| S10_extracted_26200       | 5737  | No | NA | 0  | 3 | Not-determined | Genome-fragment | NA | 0     |
| S10_extracted_26280       | 1804  | No | NA | 0  | 2 | Not-determined | Genome-fragment | NA | 0     |
| S10_extracted_26474       | 3356  | No | NA | 0  | 1 | Not-determined | Genome-fragment | NA | 0     |
| S10_extracted_26563       | 1258  | No | NA | 0  | 1 | Not-determined | Genome-fragment | NA | 0     |
| S10_extracted_26635       | 1141  | No | NA | 0  | 1 | Not-determined | Genome-fragment | NA | 0     |
| S16_extracted_26143       | 3190  | No | NA | 0  | 2 | Low-quality    | Genome-fragment | NA | 1.73  |
| S12_extracted_k141_169126 | 3190  | No | NA | 0  | 0 | Low-quality    | Genome-fragment | NA | 1.92  |
| S10_extracted_26795       | 1313  | No | NA | 0  | 0 | Not-determined | Genome-fragment | NA | 0     |
| S3_vs_k141_111061  full   | 3191  | No | NA | 0  | 0 | Low-quality    | Genome-fragment | NA | 4.86  |
| S10_extracted_26808       | 1159  | No | NA | 0  | 2 | Not-determined | Genome-fragment | NA | 0     |
| S10_extracted_26854       | 1346  | No | NA | 0  | 0 | Not-determined | Genome-fragment | NA | 0     |
| S10_extracted_110208      | 3191  | No | NA | 0  | 0 | Low-quality    | Genome-fragment | NA | 6.33  |
| S10_extracted_27056       | 4164  | No | NA | 0  | 0 | Not-determined | Genome-fragment | NA | 0     |
| S10_extracted_27065       | 1755  | No | NA | 0  | 0 | Not-determined | Genome-fragment | NA | 0     |
| S10_extracted_27155       | 2183  | No | NA | 0  | 2 | Not-determined | Genome-fragment | NA | 0     |
| S8_vs_k141_50751  full    | 3191  | No | NA | 0  | 2 | Low-quality    | Genome-fragment | NA | 3     |
| S17_vs_k141_77515  full   | 3192  | No | NA | 0  | 3 | Low-quality    | Genome-fragment | NA | 1.76  |
| S13_vs_66544  full        | 3192  | No | NA | 1  | 2 | Low-quality    | Genome-fragment | NA | 2.23  |
| S10_extracted_27632       | 1012  | No | NA | 0  | 0 | Not-determined | Genome-fragment | NA | 0     |
| S10_extracted_27687       | 1105  | No | NA | 0  | 1 | Not-determined | Genome-fragment | NA | 0     |
| S5_extracted_k141_50142   | 3192  | No | NA | 0  | 0 | Low-quality    | Genome-fragment | NA | 7.46  |
| S10_extracted_28211       | 3864  | No | NA | 0  | 2 | Not-determined | Genome-fragment | NA | 0     |
| S10_extracted_28228       | 1052  | No | NA | 0  | 1 | Not-determined | Genome-fragment | NA | 0     |
| S10_extracted_28238       | 2000  | No | NA | 0  | 2 | Not-determined | Genome-fragment | NA | 0     |
| S10_extracted_28328       | 1116  | No | NA | 0  | 1 | Not-determined | Genome-fragment | NA | 0     |
| S10_extracted_28486       | 1218  | No | NA | 0  | 1 | Not-determined | Genome-fragment | NA | 0     |
| S10_extracted_28490       | 2751  | No | NA | 0  | 1 | Not-determined | Genome-fragment | NA | 0     |
| S10_extracted_28612       | 1035  | No | NA | 0  | 1 | Not-determined | Genome-fragment | NA | 0     |
| S10_extracted_28623       | 1866  | No | NA | 0  | 2 | Not-determined | Genome-fragment | NA | 0     |
| S10_extracted_28727       | 4073  | No | NA | 0  | 3 | Not-determined | Genome-fragment | NA | 0     |
| S10_extracted_28761       | 4818  | No | NA | 0  | 2 | Not-determined | Genome-fragment | NA | 0     |
| S10_extracted_28930       | 1276  | No | NA | 0  | 0 | Not-determined | Genome-fragment | NA | 0     |
| S10_extracted_28972       | 1829  | No | NA | 0  | 1 | Not-determined | Genome-fragment | NA | 0     |
| S10_extracted_29216       | 1484  | No | NA | 0  | 1 | Not-determined | Genome-fragment | NA | 0     |
| S10_extracted_29425       | 2479  | No | NA | 0  | 4 | Not-determined | Genome-fragment | NA | 0     |
| S10_extracted_29499       | 1407  | No | NA | 0  | 0 | Not-determined | Genome-fragment | NA | 0     |
| S11_extracted_k141_42320  | 3193  | No | NA | 0  | 3 | Low-quality    | Genome-fragment | NA | 2.36  |
| S14_vs_k141_50811  full   | 3193  | No | NA | 0  | 0 | Low-quality    | Genome-fragment | NA | 5.89  |
| S10_extracted_29724       | 6976  | No | NA | 0  | 3 | Not-determined | Genome-fragment | NA | 0     |
| S7_vs_48070  full         | 3193  | No | NA | 0  | 0 | Low-quality    | Genome-fragment | NA | 7.32  |
| S10_extracted_29804       | 1200  | No | NA | 0  | 1 | Not-determined | Genome-fragment | NA | 0     |
| S10_extracted_29866       | 1327  | No | NA | 0  | 0 | Not-determined | Genome-fragment | NA | 0     |
| S10_extracted_29874       | 2629  | No | NA | 0  | 2 | Not-determined | Genome-fragment | NA | 0     |
| S10_extracted_29963       | 1724  | No | NA | 0  | 3 | Not-determined | Genome-fragment | NA | 0     |
| S10_extracted_30047       | 1083  | No | NA | 0  | 0 | Not-determined | Genome-fragment | NA | 0     |
| S10_extracted_30057       | 1018  | No | NA | 0  | 1 | Not-determined | Genome-fragment | NA | 0     |
| S10_extracted_30198       | 8061  | No | NA | 0  | 5 | Not-determined | Genome-fragment | NA | 0     |
| S14_vs_k141_44155  full   | 3194  | No | NA | 2  | 0 | Low-quality    | Genome-fragment | NA | 5.61  |
| S14_vs_k141_115481  full  | 3194  | No | NA | 2  | 0 | Low-quality    | Genome-fragment | NA | 4.18  |
| S1_extracted_k141_102489  | 3194  | No | NA | 0  | 0 | Low-quality    | Genome-fragment | NA | 3.97  |
| S10_extracted_30351       | 1345  | No | NA | 0  | 1 | Not-determined | Genome-fragment | NA | 0     |
| S16_vs_12161  v2gene      | 3194  | No | NA | 1  | 0 | Low-quality    | Genome-fragment | NA | 2.21  |
| S11_extracted_k141_42347  | 3195  | No | NA | 0  | 0 | Low-quality    | Genome-fragment | NA | 3.76  |
| S10_extracted_30521       | 1562  | No | NA | 0  | 2 | Not-determined | Genome-fragment | NA | 0     |
| S10_extracted_30532       | 1615  | No | NA | 0  | 1 | Not-determined | Genome-fragment | NA | 0     |
| S10_extracted_30552       | 1505  | No | NA | 0  | 0 | Not-determined | Genome-fragment | NA | 0     |
| S10_extracted_30559       | 1258  | No | NA | 0  | 1 | Not-determined | Genome-fragment | NA | 0     |
| S10_extracted_30885       | 1571  | No | NA | 0  | 0 | Not-determined | Genome-fragment | NA | 0     |
| S10_extracted_31056       | 2061  | No | NA | 0  | 0 | Not-determined | Genome-fragment | NA | 0     |
| S10_extracted_31161       | 10672 | No | NA | 0  | 3 | Not-determined | Genome-fragment | NA | 0     |
| S10_extracted_31304       | 11795 | No | NA | 0  | 6 | Not-determined | Genome-fragment | NA | 0     |
| S10_extracted_31364       | 1411  | No | NA | 0  | 0 | Not-determined | Genome-fragment | NA | 0     |
| S10_extracted_31415       | 5389  | No | NA | 0  | 1 | Not-determined | Genome-fragment | NA | 0     |
| S10_extracted_31429       | 1617  | No | NA | 0  | 1 | Not-determined | Genome-fragment | NA | 0     |
| S10_extracted_31487       | 1007  | No | NA | 0  | 1 | Not-determined | Genome-fragment | NA | 0     |
| S10_extracted_31491       | 1317  | No | NA | 0  | 0 | Not-determined | Genome-fragment | NA | 0     |
| S10_extracted_31548       | 1315  | No | NA | 0  | 0 | Not-determined | Genome-fragment | NA | 0     |
| S7_extracted_81431        | 3195  | No | NA | 0  | 0 | Low-quality    | Genome-fragment | NA | 8.55  |
| S10_extracted_3104279     | 3196  | No | NA | 0  | 0 | Low-quality    | Genome-fragment | NA | 10.18 |
| S10_extracted_31728       | 1488  | No | NA | 0  | 0 | Not-determined | Genome-fragment | NA | 0     |
| S10_extracted_31775       | 2092  | No | NA | 0  | 3 | Not-determined | Genome-fragment | NA | 0     |
| S10_extracted_31812       | 1151  | No | NA | 0  | 3 | Not-determined | Genome-fragment | NA | 0     |
| S10_extracted_31827       | 1010  | No | NA | 0  | 0 | Not-determined | Genome-fragment | NA | 0     |
| S10_extracted_31872       | 1179  | No | NA | 0  | 0 | Not-determined | Genome-fragment | NA | 0     |
| S8_vs_k141_12718  full    | 3196  | No | NA | 0  | 0 | Low-quality    | Genome-fragment | NA | 5.08  |
| S10_extracted_32153       | 1006  | No | NA | 0  | 1 | Not-determined | Genome-fragment | NA | 0     |
| S17_vs_k141_47579  full   | 3197  | No | NA | 0  | 3 | Low-quality    | Genome-fragment | NA | 1.74  |
| S14_vs_k141_67780  full   | 3198  | No | NA | 1  | 0 | Low-quality    | Genome-fragment | NA | 2.3   |
| S5_extracted_k141_57372   | 3198  | No | NA | 0  | 0 | Low-quality    | Genome-fragment | NA | 4.86  |
| S10_extracted_32725       | 1120  | No | NA | 0  | 2 | Not-determined | Genome-fragment | NA | 0     |
| S10_extracted_8512        | 3198  | No | NA | 0  | 1 | Low-quality    | Genome-fragment | NA | 6.73  |
| S12_extracted_k141_138277 | 3198  | No | NA | 1  | 0 | Low-quality    | Genome-fragment | NA | 2.21  |
| S10_extracted_32928       | 1064  | No | NA | 0  | 2 | Not-determined | Genome-fragment | NA | 0     |
| S1_vs_k141_76867  full    | 3199  | No | NA | 0  | 0 | Low-quality    | Genome-fragment | NA | 4.68  |
| S10_extracted_32892       | 1651  | No | NA | 0  | 2 | Not-determined | Genome-fragment | NA | 0     |
| S10_extracted_32987       | 5621  | No | NA | 0  | 4 | Not-determined | Genome-fragment | NA | 0     |
| S10_extracted_32953       | 6755  | No | NA | 0  | 1 | Not-determined | Genome-fragment | NA | 0     |
| S10_extracted_33007       | 1800  | No | NA | 0  | 2 | Not-determined | Genome-fragment | NA | 0     |
| S10_extracted_33072       | 1319  | No | NA | 0  | 1 | Not-determined | Genome-fragment | NA | 0     |
| S10_extracted_33100       | 2586  | No | NA | 0  | 1 | Not-determined | Genome-fragment | NA | 0     |
| S3_extracted_k141_105903  | 3199  | No | NA | 0  | 1 | Low-quality    | Genome-fragment | NA | 6.45  |
| S10_extracted_33471       | 1273  | No | NA | 0  | 1 | Not-determined | Genome-fragment | NA | 0     |
| S10_extracted_33584       | 1441  | No | NA | 0  | 0 | Not-determined | Genome-fragment | NA | 0     |
| S10_extracted_33637       | 1650  | No | NA | 0  | 3 | Not-determined | Genome-fragment | NA | 0     |
| S10_extracted_33649       | 1715  | No | NA | 0  | 1 | Not-determined | Genome-fragment | NA | 0     |
| S10_extracted_33740       | 1763  | No | NA | 0  | 2 | Not-determined | Genome-fragment | NA | 0     |
| S16_vs_14582  full        | 3199  | No | NA | 2  | 0 | Low-quality    | Genome-fragment | NA | 1.26  |
| S10_extracted_33809       | 1114  | No | NA | 0  | 0 | Not-determined | Genome-fragment | NA | 0     |
| S10_extracted_33881       | 2254  | No | NA | 0  | 3 | Not-determined | Genome-fragment | NA | 0     |
| S10_vs_10268  full        | 3199  | No | NA | 0  | 1 | Low-quality    | Genome-fragment | NA | 19.86 |
| S10_extracted_34021       | 3999  | No | NA | 0  | 3 | Not-determined | Genome-fragment | NA | 0     |
| S10_extracted_34039       | 2971  | No | NA | 0  | 1 | Not-determined | Genome-fragment | NA | 0     |
| S10_extracted_34056       | 1603  | No | NA | 0  | 0 | Not-determined | Genome-fragment | NA | 0     |
| S10_extracted_34233       | 2395  | No | NA | 0  | 1 | Not-determined | Genome-fragment | NA | 0     |
| S3_extracted_k141_72258   | 3200  | No | NA | 1  | 0 | Low-quality    | Genome-fragment | NA | 3.98  |
| S10_extracted_34351       | 1667  | No | NA | 0  | 1 | Not-determined | Genome-fragment | NA | 0     |
| S10_extracted_34395       | 1121  | No | NA | 0  | 0 | Not-determined | Genome-fragment | NA | 0     |
| S10_extracted_34414       | 1164  | No | NA | 0  | 0 | Not-determined | Genome-fragment | NA | 0     |
| S12_extracted_57018       | 3201  | No | NA | 0  | 1 | Low-quality    | Genome-fragment | NA | 1.89  |
| S10_extracted_34541       | 2370  | No | NA | 0  | 1 | Not-determined | Genome-fragment | NA | 0     |
| S10_extracted_34574       | 2157  | No | NA | 0  | 4 | Not-determined | Genome-fragment | NA | 0     |
| S3_vs_k141_57764  full    | 3201  | No | NA | 2  | 0 | Low-quality    | Genome-fragment | NA | 5.99  |
| S10_extracted_34817       | 1392  | No | NA | 0  | 1 | Not-determined | Genome-fragment | NA | 0     |
| S3_vs_k141_109702  full   | 3201  | No | NA | 0  | 1 | Low-quality    | Genome-fragment | NA | 7.38  |
| S10_vs_k141_43550  full   | 3202  | No | NA | 1  | 0 | Low-quality    | Genome-fragment | NA | 6.77  |
| S10_extracted_34948       | 3379  | No | NA | 0  | 2 | Not-determined | Genome-fragment | NA | 0     |
| S10_extracted_34960       | 1389  | No | NA | 0  | 1 | Not-determined | Genome-fragment | NA | 0     |
| S10_extracted_35226       | 1203  | No | NA | 0  | 0 | Not-determined | Genome-fragment | NA | 0     |
| S3_vs_k141_121634  full   | 3202  | No | NA | 0  | 0 | Low-quality    | Genome-fragment | NA | 6.2   |
| S10_extracted_35311       | 1313  | No | NA | 0  | 1 | Not-determined | Genome-fragment | NA | 0     |
| S10_extracted_35381       | 1288  | No | NA | 0  | 1 | Not-determined | Genome-fragment | NA | 0     |
| S8_extracted_k141_177909  | 3202  | No | NA | 0  | 1 | Low-quality    | Genome-fragment | NA | 0.84  |
| S10_extracted_35584       | 1151  | No | NA | 0  | 1 | Not-determined | Genome-fragment | NA | 0     |
| S10_extracted_35669       | 1016  | No | NA | 0  | 1 | Not-determined | Genome-fragment | NA | 0     |
| S10_extracted_35693       | 1526  | No | NA | 0  | 0 | Not-determined | Genome-fragment | NA | 0     |
| S10_extracted_35754       | 4639  | No | NA | 0  | 3 | Not-determined | Genome-fragment | NA | 0     |
| S10_extracted_35857       | 2421  | No | NA | 0  | 1 | Not-determined | Genome-fragment | NA | 0     |
| S10_extracted_35911       | 1242  | No | NA | 0  | 1 | Not-determined | Genome-fragment | NA | 0     |
| S10_extracted_35938       | 1550  | No | NA | 0  | 2 | Not-determined | Genome-fragment | NA | 0     |
| S10_extracted_36012       | 1732  | No | NA | 0  | 2 | Not-determined | Genome-fragment | NA | 0     |
| S10_extracted_36035       | 1425  | No | NA | 0  | 2 | Not-determined | Genome-fragment | NA | 0     |
| S10_extracted_36044       | 1090  | No | NA | 0  | 1 | Not-determined | Genome-fragment | NA | 0     |
| S17_vs_k141_85688  full   | 3203  | No | NA | 0  | 0 | Low-quality    | Genome-fragment | NA | 3.41  |
| S3_extracted_k141_94821   | 3203  | No | NA | 0  | 2 | Low-quality    | Genome-fragment | NA | 4.23  |
| S10_extracted_36543       | 1122  | No | NA | 0  | 0 | Not-determined | Genome-fragment | NA | 0     |
| S10_extracted_36606       | 1532  | No | NA | 0  | 1 | Not-determined | Genome-fragment | NA | 0     |
| S5_vs_k141_127918  full   | 3204  | No | NA | 1  | 0 | Low-quality    | Genome-fragment | NA | 7.29  |
| S10_extracted_36729       | 11110 | No | NA | 0  | 1 | Not-determined | Genome-fragment | NA | 0     |
| S10_extracted_36742       | 4500  | No | NA | 0  | 2 | Not-determined | Genome-fragment | NA | 0     |
| S10_extracted_36744       | 3871  | No | NA | 0  | 2 | Not-determined | Genome-fragment | NA | 0     |
| S10_extracted_36836       | 10017 | No | NA | 0  | 5 | Not-determined | Genome-fragment | NA | 0     |
| S10_extracted_36858       | 3505  | No | NA | 0  | 1 | Not-determined | Genome-fragment | NA | 0     |
| S10_extracted_36880       | 93310 | No | NA | 10 | 0 | Complete       | High-quality    | NA | 100   |
| S10_extracted_37001       | 3569  | No | NA | 0  | 1 | Not-determined | Genome-fragment | NA | 0     |



|                           |       |    |    |    |   |                |                 |       |   |
|---------------------------|-------|----|----|----|---|----------------|-----------------|-------|---|
| S16_extracted_4161        | 3205  | No | NA | 1  | 0 | Low-quality    | Genome-fragment | 6.53  | 0 |
| S10_extracted_39250       | 1203  | No | NA | 0  | 0 | Not-determined | Genome-fragment | NA    | 0 |
| S10_extracted_39447       | 3424  | No | NA | 0  | 1 | Not-determined | Genome-fragment | NA    | 0 |
| S10_extracted_39453       | 2571  | No | NA | 0  | 3 | Not-determined | Genome-fragment | NA    | 0 |
| S10_extracted_39549       | 5895  | No | NA | 0  | 4 | Not-determined | Genome-fragment | NA    | 0 |
| S10_extracted_39779       | 1287  | No | NA | 0  | 0 | Not-determined | Genome-fragment | NA    | 0 |
| S16_vs_55879[full]        | 3205  | No | NA | 1  | 0 | Low-quality    | Genome-fragment | 9.77  | 0 |
| S11_extracted_k141_25656  | 3206  | No | NA | 6  | 0 | Low-quality    | Genome-fragment | 7.92  | 0 |
| S10_extracted_40073       | 1612  | No | NA | 2  | 0 | Not-determined | Genome-fragment | NA    | 0 |
| S3_extracted_k141_19282   | 3206  | No | NA | 2  | 0 | Low-quality    | Genome-fragment | 14.31 | 0 |
| S10_extracted_40134       | 8936  | No | NA | 0  | 3 | Not-determined | Genome-fragment | NA    | 0 |
| S10_extracted_40251       | 1126  | No | NA | 0  | 0 | Not-determined | Genome-fragment | NA    | 0 |
| S10_extracted_40324       | 1218  | No | NA | 0  | 0 | Not-determined | Genome-fragment | NA    | 0 |
| S10_extracted_40360       | 1159  | No | NA | 0  | 0 | Not-determined | Genome-fragment | NA    | 0 |
| S13_extracted_124963      | 3207  | No | NA | 0  | 0 | Low-quality    | Genome-fragment | 7.36  | 0 |
| S10_extracted_40555       | 1041  | No | NA | 0  | 0 | Not-determined | Genome-fragment | NA    | 0 |
| S5_vs_k141_9317[full]     | 3207  | No | NA | 3  | 0 | Low-quality    | Genome-fragment | 5.29  | 0 |
| S10_extracted_40689       | 1004  | No | NA | 0  | 1 | Not-determined | Genome-fragment | NA    | 0 |
| S10_extracted_40799       | 1374  | No | NA | 0  | 0 | Not-determined | Genome-fragment | NA    | 0 |
| S16_vs_15904[full]        | 3207  | No | NA | 0  | 2 | Low-quality    | Genome-fragment | 1.84  | 0 |
| S10_extracted_41305       | 3303  | No | NA | 0  | 6 | Not-determined | Genome-fragment | NA    | 0 |
| S10_extracted_41380       | 5198  | No | NA | 0  | 4 | Not-determined | Genome-fragment | NA    | 0 |
| S10_extracted_41427       | 1399  | No | NA | 0  | 1 | Not-determined | Genome-fragment | NA    | 0 |
| S10_extracted_41456       | 1182  | No | NA | 0  | 1 | Not-determined | Genome-fragment | NA    | 0 |
| S10_extracted_41481       | 2857  | No | NA | 0  | 0 | Not-determined | Genome-fragment | NA    | 0 |
| S10_extracted_41537       | 1009  | No | NA | 0  | 0 | Not-determined | Genome-fragment | NA    | 0 |
| S10_extracted_41664       | 4698  | No | NA | 0  | 4 | Not-determined | Genome-fragment | NA    | 0 |
| S6_vs_k141_8009[full]     | 3207  | No | NA | 0  | 1 | Low-quality    | Genome-fragment | 1.01  | 0 |
| S10_extracted_41934       | 1148  | No | NA | 0  | 1 | Not-determined | Genome-fragment | NA    | 0 |
| S10_extracted_41954       | 1015  | No | NA | 0  | 0 | Not-determined | Genome-fragment | NA    | 0 |
| S10_extracted_42022       | 1230  | No | NA | 0  | 1 | Not-determined | Genome-fragment | NA    | 0 |
| S10_extracted_42129       | 1158  | No | NA | 0  | 3 | Not-determined | Genome-fragment | NA    | 0 |
| S10_extracted_42292       | 1293  | No | NA | 0  | 1 | Not-determined | Genome-fragment | NA    | 0 |
| S11_vs_k141_22187[full]   | 3208  | No | NA | 0  | 1 | Low-quality    | Genome-fragment | 1.1   | 0 |
| S10_extracted_42378       | 2394  | No | NA | 0  | 0 | Not-determined | Genome-fragment | NA    | 0 |
| S8_vs_k141_132847[full]   | 3208  | No | NA | 0  | 0 | Low-quality    | Genome-fragment | 8.33  | 0 |
| S10_extracted_42420       | 1057  | No | NA | 0  | 1 | Not-determined | Genome-fragment | NA    | 0 |
| S10_extracted_42435       | 1095  | No | NA | 0  | 1 | Not-determined | Genome-fragment | NA    | 0 |
| S10_extracted_42460       | 5371  | No | NA | 0  | 0 | Not-determined | Genome-fragment | NA    | 0 |
| S8_vs_k141_83570[full]    | 3208  | No | NA | 0  | 1 | Low-quality    | Genome-fragment | 8.4   | 0 |
| S10_extracted_42843       | 1309  | No | NA | 0  | 0 | Not-determined | Genome-fragment | NA    | 0 |
| S10_extracted_42978       | 1925  | No | NA | 0  | 0 | Not-determined | Genome-fragment | NA    | 0 |
| S10_extracted_43016       | 2619  | No | NA | 0  | 1 | Not-determined | Genome-fragment | NA    | 0 |
| S10_extracted_43093       | 1490  | No | NA | 0  | 1 | Not-determined | Genome-fragment | NA    | 0 |
| S17_vs_k141_5228[full]    | 3209  | No | NA | 2  | 0 | Low-quality    | Genome-fragment | 4.85  | 0 |
| S7_vs_16226[full]         | 3209  | No | NA | 0  | 1 | Low-quality    | Genome-fragment | 1.14  | 0 |
| S16_extracted_151353      | 3209  | No | NA | 2  | 0 | Low-quality    | Genome-fragment | 1.91  | 0 |
| S6_vs_k141_20840[full]    | 3209  | No | NA | 0  | 1 | Low-quality    | Genome-fragment | 4.37  | 0 |
| S11_extracted_k141_78402  | 3210  | No | NA | 0  | 0 | Low-quality    | Genome-fragment | 1.11  | 0 |
| S10_extracted_43569       | 1051  | No | NA | 0  | 0 | Not-determined | Genome-fragment | NA    | 0 |
| S10_extracted_43623       | 5440  | No | NA | 0  | 3 | Not-determined | Genome-fragment | NA    | 0 |
| S10_extracted_43764       | 2695  | No | NA | 0  | 2 | Not-determined | Genome-fragment | NA    | 0 |
| S10_extracted_43964       | 99399 | No | NA | 15 | 0 | Complete       | High-quality    | 100   | 0 |
| S11_extracted_k141_113056 | 3210  | No | NA | 0  | 4 | Low-quality    | Genome-fragment | 0.93  | 0 |
| S10_extracted_43999       | 1346  | No | NA | 0  | 1 | Not-determined | Genome-fragment | NA    | 0 |
| S3_vs_k141_57452[full]    | 3210  | No | NA | 0  | 2 | Low-quality    | Genome-fragment | 2.23  | 0 |
| S16_vs_2336[full]         | 3210  | No | NA | 2  | 0 | Low-quality    | Genome-fragment | 8.06  | 0 |
| S10_extracted_44161       | 2481  | No | NA | 0  | 2 | Not-determined | Genome-fragment | NA    | 0 |
| S10_extracted_44116       | 2646  | No | NA | 0  | 0 | Not-determined | Genome-fragment | NA    | 0 |
| S10_extracted_44332       | 1122  | No | NA | 0  | 2 | Not-determined | Genome-fragment | NA    | 0 |
| S10_extracted_44474       | 1337  | No | NA | 0  | 1 | Not-determined | Genome-fragment | NA    | 0 |
| S17_extracted_k141_123439 | 3211  | No | NA | 0  | 0 | Low-quality    | Genome-fragment | 4.86  | 0 |
| S11_vs_k141_83651[full]   | 3211  | No | NA | 1  | 0 | Low-quality    | Genome-fragment | 3.38  | 0 |
| S10_extracted_44637       | 3331  | No | NA | 0  | 0 | Not-determined | Genome-fragment | NA    | 0 |
| S10_extracted_44750       | 4858  | No | NA | 5  | 1 | Not-determined | Genome-fragment | NA    | 0 |
| S10_extracted_44821       | 1152  | No | NA | 0  | 1 | Not-determined | Genome-fragment | NA    | 0 |
| S10_extracted_44859       | 1040  | No | NA | 0  | 0 | Not-determined | Genome-fragment | NA    | 0 |
| S5_vs_k141_40547[full]    | 3211  | No | NA | 3  | 0 | Low-quality    | Genome-fragment | 9.2   | 0 |
| S10_extracted_44949       | 1044  | No | NA | 0  | 1 | Not-determined | Genome-fragment | NA    | 0 |
| S10_extracted_45003       | 1110  | No | NA | 0  | 1 | Not-determined | Genome-fragment | NA    | 0 |
| S10_extracted_45004       | 5021  | No | NA | 0  | 3 | Not-determined | Genome-fragment | NA    | 0 |
| S10_extracted_45117       | 3256  | No | NA | 0  | 3 | Not-determined | Genome-fragment | NA    | 0 |
| S10_extracted_45152       | 2009  | No | NA | 0  | 0 | Not-determined | Genome-fragment | NA    | 0 |
| S10_extracted_45157       | 1150  | No | NA | 0  | 1 | Not-determined | Genome-fragment | NA    | 0 |
| S10_extracted_45352       | 3281  | No | NA | 0  | 1 | Not-determined | Genome-fragment | NA    | 0 |
| S10_extracted_45362       | 3010  | No | NA | 0  | 2 | Not-determined | Genome-fragment | NA    | 0 |
| S10_extracted_45580       | 1455  | No | NA | 0  | 0 | Not-determined | Genome-fragment | NA    | 0 |
| S10_extracted_45638       | 2933  | No | NA | 0  | 0 | Not-determined | Genome-fragment | NA    | 0 |
| S10_extracted_45668       | 1006  | No | NA | 0  | 1 | Not-determined | Genome-fragment | NA    | 0 |
| S10_extracted_45714       | 1328  | No | NA | 0  | 0 | Not-determined | Genome-fragment | NA    | 0 |
| S10_extracted_45758       | 1331  | No | NA | 0  | 0 | Not-determined | Genome-fragment | NA    | 0 |
| S7_vs_29515[full]         | 3211  | No | NA | 0  | 2 | Low-quality    | Genome-fragment | 3.36  | 0 |
| S10_extracted_45948       | 1503  | No | NA | 0  | 1 | Not-determined | Genome-fragment | NA    | 0 |
| S10_extracted_45958       | 1078  | No | NA | 0  | 1 | Not-determined | Genome-fragment | NA    | 0 |
| S10_vs_3128[full]         | 3211  | No | NA | 0  | 0 | Low-quality    | Genome-fragment | 2.22  | 0 |
| S10_extracted_46090       | 1052  | No | NA | 0  | 1 | Not-determined | Genome-fragment | NA    | 0 |
| S10_extracted_46139       | 1078  | No | NA | 0  | 1 | Not-determined | Genome-fragment | NA    | 0 |
| S12_vs_k141_12310[full]   | 3211  | No | NA | 3  | 0 | Low-quality    | Genome-fragment | 5.61  | 0 |
| S10_extracted_46257       | 3619  | No | NA | 0  | 1 | Not-determined | Genome-fragment | NA    | 0 |
| S10_extracted_46281       | 1002  | No | NA | 0  | 2 | Not-determined | Genome-fragment | NA    | 0 |
| S10_extracted_46285       | 2786  | No | NA | 0  | 4 | Not-determined | Genome-fragment | NA    | 0 |
| S10_extracted_46302       | 1071  | No | NA | 0  | 1 | Not-determined | Genome-fragment | NA    | 0 |
| S10_extracted_46307       | 3909  | No | NA | 0  | 3 | Not-determined | Genome-fragment | NA    | 0 |
| S10_extracted_46328       | 24210 | No | NA | 12 | 0 | Medium-quality | Genome-fragment | 55.73 | 0 |
| S10_extracted_46444       | 4061  | No | NA | 0  | 4 | Not-determined | Genome-fragment | NA    | 0 |
| S10_extracted_46522       | 1067  | No | NA | 0  | 0 | Not-determined | Genome-fragment | NA    | 0 |
| S10_extracted_46732       | 3435  | No | NA | 0  | 2 | Not-determined | Genome-fragment | NA    | 0 |
| S10_extracted_46760       | 1656  | No | NA | 0  | 2 | Not-determined | Genome-fragment | NA    | 0 |
| S16_extracted_115061      | 3212  | No | NA | 0  | 0 | Low-quality    | Genome-fragment | 5.34  | 0 |
| S10_extracted_46824       | 6076  | No | NA | 0  | 0 | Not-determined | Genome-fragment | NA    | 0 |
| S10_extracted_46828       | 1398  | No | NA | 0  | 0 | Not-determined | Genome-fragment | NA    | 0 |
| S10_extracted_46862       | 1801  | No | NA | 0  | 1 | Not-determined | Genome-fragment | NA    | 0 |
| S15_vs_57898[full]        | 3212  | No | NA | 0  | 0 | Low-quality    | Genome-fragment | 5.24  | 0 |
| S9_extracted_k141_5107    | 6477  | No | NA | 1  | 0 | Medium-quality | Genome-fragment | 54.49 | 0 |
| S10_extracted_47170       | 3213  | No | NA | 0  | 0 | Low-quality    | Genome-fragment | 7.35  | 0 |
| S10_extracted_47511       | 1115  | No | NA | 0  | 1 | Not-determined | Genome-fragment | NA    | 0 |
| S10_extracted_47615       | 3039  | No | NA | 0  | 1 | Not-determined | Genome-fragment | NA    | 0 |
| S10_extracted_47792       | 1091  | No | NA | 0  | 1 | Not-determined | Genome-fragment | NA    | 0 |
| S10_extracted_47816       | 1229  | No | NA | 0  | 0 | Not-determined | Genome-fragment | NA    | 0 |
| S10_extracted_47859       | 1135  | No | NA | 0  | 0 | Not-determined | Genome-fragment | NA    | 0 |
| S10_extracted_47872       | 1171  | No | NA | 0  | 1 | Not-determined | Genome-fragment | NA    | 0 |
| S10_extracted_47912       | 1934  | No | NA | 0  | 1 | Not-determined | Genome-fragment | NA    | 0 |
| S10_extracted_47913       | 1532  | No | NA | 0  | 1 | Not-determined | Genome-fragment | NA    | 0 |
| S10_extracted_47948       | 1502  | No | NA | 0  | 0 | Not-determined | Genome-fragment | NA    | 0 |
| S10_extracted_48109       | 1252  | No | NA | 0  | 0 | Not-determined | Genome-fragment | NA    | 0 |
| S10_extracted_48112       | 1622  | No | NA | 0  | 2 | Not-determined | Genome-fragment | NA    | 0 |
| S10_extracted_48194       | 8916  | No | NA | 0  | 4 | Not-determined | Genome-fragment | NA    | 0 |
| S10_extracted_48230       | 3657  | No | NA | 0  | 4 | Not-determined | Genome-fragment | NA    | 0 |
| S10_extracted_48275       | 1217  | No | NA | 0  | 1 | Not-determined | Genome-fragment | NA    | 0 |
| S3_extracted_k141_50700   | 3213  | No | NA | 0  | 1 | Low-quality    | Genome-fragment | 1.62  | 0 |
| S6_vs_k141_24967[full]    | 3213  | No | NA | 2  | 0 | Low-quality    | Genome-fragment | 8.12  | 0 |
| S10_extracted_48738       | 20454 | No | NA | 0  | 0 | Not-determined | Genome-fragment | NA    | 0 |
| S10_extracted_48751       | 1661  | No | NA | 0  | 0 | Not-determined | Genome-fragment | NA    | 0 |
| S5_vs_k141_17441[full]    | 3213  | No | NA | 0  | 2 | Low-quality    | Genome-fragment | 0.79  | 0 |
| S5_vs_k141_36118[full]    | 3213  | No | NA | 0  | 0 | Low-quality    | Genome-fragment | 7.28  | 0 |
| S10_extracted_4462        | 3213  | No | NA | 2  | 0 | Low-quality    | Genome-fragment | 7.15  | 0 |
| S10_extracted_48908       | 1241  | No | NA | 0  | 1 | Not-determined | Genome-fragment | NA    | 0 |
| S10_extracted_48938       | 1244  | No | NA | 0  | 1 | Not-determined | Genome-fragment | NA    | 0 |
| S11_vs_k141_77815[full]   | 3214  | No | NA | 1  | 0 | Low-quality    | Genome-fragment | 2.02  | 0 |
| S10_extracted_49180       | 4238  | No | NA | 0  | 2 | Not-determined | Genome-fragment | NA    | 0 |
| S10_extracted_49322       | 4275  | No | NA | 0  | 2 | Not-determined | Genome-fragment | NA    | 0 |
| S10_extracted_49401       | 2955  | No | NA | 0  | 2 | Not-determined | Genome-fragment | NA    | 0 |
| S10_extracted_49468       | 1067  | No | NA | 0  | 1 | Not-determined | Genome-fragment | NA    | 0 |
| S16_extracted_10021       | 3214  | No | NA | 3  | 0 | Low-quality    | Genome-fragment | 6.35  | 0 |
| S10_extracted_49533       | 1012  | No | NA | 0  | 0 | Not-determined | Genome-fragment | NA    | 0 |
| S10_extracted_49552       | 1135  | No | NA | 0  | 0 | Not-determined | Genome-fragment | NA    | 0 |
| S10_extracted_49703       | 1369  | No | NA | 0  | 1 | Not-determined | Genome-fragment | NA    | 0 |
| S10_extracted_49837       | 2021  | No | NA | 0  | 4 | Not-determined | Genome-fragment | NA    | 0 |
| S10_extracted_49851       | 15276 | No | NA | 0  | 4 | Not-determined | Genome-fragment | NA    | 0 |
| S10_extracted_49914       | 1290  | No | NA | 0  | 1 | Not-determined | Genome-fragment | NA    | 0 |
| S10_extracted_49994       | 1109  | No | NA | 0  | 2 | Not-determined | Genome-fragment | NA    | 0 |
| S10_extracted_49996       | 1820  | No | NA | 0  | 1 | Not-determined | Genome-fragment | NA    | 0 |
| S10_extracted_50014       | 1685  | No | NA | 0  | 2 | Not-determined | Genome-fragment | NA    | 0 |
| S5_vs_k141_18221[full]    | 3215  | No | NA | 3  | 0 | Low-quality    | Genome-fragment | 2.64  | 0 |
| S7_extracted_5479         | 3215  | No | NA | 0  | 0 | Low-quality    | Genome-fragment | 8.97  | 0 |
| S7_vs_110952[full]        | 3215  | No | NA | 3  | 0 | Low-quality    | Genome-fragment | 6.74  | 0 |
| S10_extracted_50397       | 1456  | No | NA | 0  | 1 | Not-determined | Genome-fragment | NA    | 0 |
| S10_extracted_50703       | 3010  | No | NA | 0  | 2 | Not-determined | Genome-fragment | NA    | 0 |
| S10_extracted_50797       | 2043  | No | NA | 0  | 1 | Not-determined | Genome-fragment | NA    | 0 |
| S14_vs_k141_80705[full]   | 3217  | No | NA | 2  | 0 | Low-quality    | Genome-fragment | 10.41 | 0 |
| S5_vs_k141_136889         |       |    |    |    |   |                |                 |       |   |



|                            |       |     |      |    |   |                |                 |       |       |
|----------------------------|-------|-----|------|----|---|----------------|-----------------|-------|-------|
| S10_extracted_52510        | 1048  | No  | NA   | 0  | 1 | Not-determined | Genome-fragment | NA    | 0     |
| S10_extracted_52511        | 1604  | No  | NA   | 0  | 1 | Not-determined | Genome-fragment | NA    | 0     |
| S10_extracted_52553        | 1058  | No  | NA   | 0  | 1 | Not-determined | Genome-fragment | NA    | 0     |
| S10_extracted_52577        | 1221  | No  | NA   | 0  | 0 | Not-determined | Genome-fragment | NA    | 0     |
| S10_extracted_52628        | 1040  | No  | NA   | 0  | 1 | Not-determined | Genome-fragment | NA    | 0     |
| S10_extracted_52674        | 2997  | No  | NA   | 0  | 1 | Not-determined | Genome-fragment | NA    | 0     |
| S10_extracted_52893        | 1028  | No  | NA   | 0  | 2 | Not-determined | Genome-fragment | NA    | 0     |
| S10_extracted_52953        | 1283  | No  | NA   | 0  | 0 | Not-determined | Genome-fragment | NA    | 0     |
| S10_extracted_53052        | 2046  | No  | NA   | 0  | 1 | Not-determined | Genome-fragment | NA    | 0     |
| S10_extracted_53064        | 1202  | No  | NA   | 0  | 0 | Not-determined | Genome-fragment | NA    | 0     |
| S10_extracted_53254        | 1077  | No  | NA   | 0  | 1 | Not-determined | Genome-fragment | NA    | 0     |
| S10_extracted_53288        | 1741  | No  | NA   | 0  | 0 | Not-determined | Genome-fragment | NA    | 0     |
| S7_vs_5221 full            | 3220  | No  | NA   | 2  | 0 | Low-quality    | Genome-fragment | 7.54  | 0     |
| S10_extracted_53439        | 5770  | No  | NA   | 0  | 2 | Not-determined | Genome-fragment | NA    | 0     |
| S10_extracted_65088        | 3220  | No  | NA   | 0  | 3 | Low-quality    | Genome-fragment | 2.28  | 0     |
| S5_vs_k141_1141051 full    | 3222  | No  | NA   | 0  | 0 | Low-quality    | Genome-fragment | 7.49  | 0     |
| S10_extracted_53604        | 1256  | No  | NA   | 0  | 1 | Not-determined | Genome-fragment | NA    | 0     |
| S10_extracted_53637        | 2968  | No  | NA   | 0  | 3 | Not-determined | Genome-fragment | NA    | 0     |
| S10_extracted_53676        | 1142  | No  | NA   | 0  | 1 | Not-determined | Genome-fragment | NA    | 0     |
| S8_vs_k141_183641 full     | 3222  | No  | NA   | 0  | 1 | Low-quality    | Genome-fragment | 3.84  | 0     |
| S10_extracted_53778        | 1149  | No  | NA   | 0  | 0 | Not-determined | Genome-fragment | NA    | 0     |
| S10_extracted_53816        | 1983  | No  | NA   | 0  | 0 | Not-determined | Genome-fragment | NA    | 0     |
| S10_extracted_53927        | 1608  | No  | NA   | 0  | 0 | Not-determined | Genome-fragment | NA    | 0     |
| S11_vs_k141_631621 full    | 3223  | No  | NA   | 0  | 1 | Low-quality    | Genome-fragment | 9.4   | 0     |
| S12_vs_k141_841881 full    | 3223  | No  | NA   | 3  | 0 | Low-quality    | Genome-fragment | 9.06  | 0     |
| S10_extracted_54150        | 1120  | No  | NA   | 0  | 0 | Not-determined | Genome-fragment | NA    | 0     |
| S4_extracted_4719          | 3223  | No  | NA   | 3  | 0 | Low-quality    | Genome-fragment | 10.62 | 0     |
| S10_extracted_54341        | 3386  | No  | NA   | 0  | 0 | Not-determined | Genome-fragment | NA    | 0     |
| S10_extracted_54367        | 1309  | No  | NA   | 0  | 1 | Not-determined | Genome-fragment | NA    | 0     |
| S10_extracted_54390        | 4462  | No  | NA   | 0  | 0 | Not-determined | Genome-fragment | NA    | 0     |
| S10_extracted_54461        | 1022  | No  | NA   | 0  | 0 | Not-determined | Genome-fragment | NA    | 0     |
| S10_extracted_54515        | 4261  | No  | NA   | 0  | 2 | Not-determined | Genome-fragment | NA    | 0     |
| S10_extracted_54591        | 1113  | No  | NA   | 0  | 1 | Not-determined | Genome-fragment | NA    | 0     |
| S10_extracted_54600        | 1089  | No  | NA   | 0  | 1 | Not-determined | Genome-fragment | NA    | 0     |
| S10_extracted_54601        | 5846  | No  | NA   | 0  | 0 | Not-determined | Genome-fragment | NA    | 0     |
| S9_vs_k141_47421 102genome | 3225  | No  | NA   | 0  | 0 | Low-quality    | Genome-fragment | 4.71  | 0     |
| S10_extracted_54750        | 1459  | No  | NA   | 0  | 1 | Not-determined | Genome-fragment | NA    | 0     |
| S10_extracted_54763        | 5994  | No  | NA   | 0  | 6 | Not-determined | Genome-fragment | NA    | 0     |
| S14_extracted_k141_7399    | 3225  | No  | NA   | 0  | 1 | Low-quality    | Genome-fragment | 5.91  | 0     |
| S10_extracted_54894        | 1062  | No  | NA   | 0  | 0 | Not-determined | Genome-fragment | NA    | 0     |
| S10_extracted_55011        | 1258  | No  | NA   | 0  | 1 | Not-determined | Genome-fragment | NA    | 0     |
| S10_extracted_55184        | 1252  | No  | NA   | 0  | 1 | Not-determined | Genome-fragment | NA    | 0     |
| S10_extracted_55249        | 1391  | No  | NA   | 0  | 0 | Not-determined | Genome-fragment | NA    | 0     |
| S10_extracted_55258        | 1170  | No  | NA   | 0  | 0 | Not-determined | Genome-fragment | NA    | 0     |
| S12_vs_k141_221861 full    | 3225  | No  | NA   | 0  | 0 | Low-quality    | Genome-fragment | 7.42  | 0     |
| S10_extracted_55489        | 1015  | No  | NA   | 0  | 0 | Not-determined | Genome-fragment | NA    | 0     |
| S10_extracted_55534        | 1502  | No  | NA   | 0  | 0 | Not-determined | Genome-fragment | NA    | 0     |
| S10_extracted_55550        | 3300  | No  | NA   | 0  | 2 | Not-determined | Genome-fragment | NA    | 0     |
| S10_extracted_55844        | 4857  | No  | NA   | 0  | 2 | Not-determined | Genome-fragment | NA    | 0     |
| S14_vs_k141_752541 full    | 3226  | No  | NA   | 1  | 0 | Low-quality    | Genome-fragment | 6.9   | 0     |
| S16_extracted_119730       | 3226  | No  | NA   | 1  | 0 | Low-quality    | Genome-fragment | 8.36  | 0     |
| S10_extracted_56081        | 1061  | No  | NA   | 0  | 0 | Not-determined | Genome-fragment | NA    | 0     |
| S16_extracted_11094        | 3227  | No  | NA   | 0  | 3 | Low-quality    | Genome-fragment | 0.94  | 0     |
| S10_extracted_56154        | 3875  | No  | NA   | 0  | 2 | Not-determined | Genome-fragment | NA    | 0     |
| S10_extracted_56176        | 1856  | No  | NA   | 0  | 2 | Not-determined | Genome-fragment | NA    | 0     |
| S10_extracted_56221        | 9804  | No  | NA   | 0  | 1 | Not-determined | Genome-fragment | NA    | 0     |
| S10_extracted_56358        | 1674  | No  | NA   | 0  | 0 | Not-determined | Genome-fragment | NA    | 0     |
| S10_extracted_56448        | 3356  | No  | NA   | 0  | 0 | Not-determined | Genome-fragment | NA    | 0     |
| S10_extracted_56538        | 1336  | No  | NA   | 0  | 0 | Not-determined | Genome-fragment | NA    | 0     |
| S10_extracted_56570        | 6394  | No  | NA   | 0  | 4 | Not-determined | Genome-fragment | NA    | 0     |
| S10_extracted_56614        | 5151  | No  | NA   | 0  | 1 | Not-determined | Genome-fragment | NA    | 0     |
| S10_extracted_56624        | 2113  | No  | NA   | 0  | 1 | Not-determined | Genome-fragment | NA    | 0     |
| S10_extracted_56706        | 1185  | No  | NA   | 0  | 1 | Not-determined | Genome-fragment | NA    | 0     |
| S10_extracted_56836        | 2124  | No  | NA   | 0  | 1 | Not-determined | Genome-fragment | NA    | 0     |
| S16_vs_492001 full         | 3227  | Yes | 1788 | 1  | 1 | Low-quality    | Genome-fragment | 2.71  | 44.59 |
| S10_extracted_57007        | 1278  | No  | NA   | 0  | 0 | Not-determined | Genome-fragment | NA    | 0     |
| S13_extracted_33147        | 3228  | No  | NA   | 0  | 1 | Low-quality    | Genome-fragment | 2.23  | 0     |
| S10_extracted_57109        | 1698  | No  | NA   | 0  | 0 | Not-determined | Genome-fragment | NA    | 0     |
| S16_extracted_557781       | 3228  | No  | NA   | 0  | 0 | Low-quality    | Genome-fragment | 7.05  | 0     |
| S12_vs_k141_950511 full    | 3228  | No  | NA   | 1  | 0 | Low-quality    | Genome-fragment | 5.43  | 0     |
| S10_extracted_57233        | 1048  | No  | NA   | 0  | 3 | Not-determined | Genome-fragment | NA    | 0     |
| S17_vs_k141_929781 full    | 3229  | No  | NA   | 0  | 2 | Low-quality    | Genome-fragment | 1.09  | 0     |
| S10_extracted_57358        | 1339  | No  | NA   | 0  | 1 | Not-determined | Genome-fragment | NA    | 0     |
| S10_extracted_57437        | 1165  | No  | NA   | 0  | 2 | Not-determined | Genome-fragment | NA    | 0     |
| S10_extracted_57447        | 1006  | No  | NA   | 0  | 1 | Not-determined | Genome-fragment | NA    | 0     |
| S14_extracted_k141_27469   | 3229  | No  | NA   | 7  | 0 | Low-quality    | Genome-fragment | 10.64 | 0     |
| S16_vs_164061 full         | 3229  | No  | NA   | 3  | 0 | Low-quality    | Genome-fragment | 9.53  | 0     |
| S10_extracted_57593        | 5158  | No  | NA   | 0  | 4 | Not-determined | Genome-fragment | NA    | 0     |
| S10_extracted_57644        | 1336  | No  | NA   | 0  | 2 | Not-determined | Genome-fragment | NA    | 0     |
| S10_extracted_57705        | 19928 | No  | NA   | 6  | 0 | Medium-quality | Genome-fragment | 62.54 | 0     |
| S6_vs_k141_221931 full     | 3229  | No  | NA   | 0  | 1 | Low-quality    | Genome-fragment | 7.55  | 0     |
| S10_extracted_57980        | 1855  | No  | NA   | 0  | 1 | Not-determined | Genome-fragment | NA    | 0     |
| S10_extracted_57993        | 6837  | No  | NA   | 0  | 2 | Not-determined | Genome-fragment | NA    | 0     |
| S14_extracted_k141_75012   | 3230  | No  | NA   | 3  | 0 | Low-quality    | Genome-fragment | 5.58  | 0     |
| S14_extracted_k141_98128   | 3230  | No  | NA   | 6  | 0 | Low-quality    | Genome-fragment | 10.44 | 0     |
| S10_extracted_58408        | 1675  | No  | NA   | 0  | 1 | Not-determined | Genome-fragment | NA    | 0     |
| S10_extracted_58538        | 4242  | No  | NA   | 0  | 6 | Not-determined | Genome-fragment | NA    | 0     |
| S10_extracted_58540        | 2973  | No  | NA   | 0  | 1 | Not-determined | Genome-fragment | NA    | 0     |
| S14_vs_k141_958391 full    | 3230  | No  | NA   | 0  | 0 | Low-quality    | Genome-fragment | 9.77  | 0     |
| S10_extracted_58665        | 1084  | No  | NA   | 0  | 1 | Not-determined | Genome-fragment | NA    | 0     |
| S10_extracted_58679        | 2398  | No  | NA   | 0  | 2 | Not-determined | Genome-fragment | NA    | 0     |
| S10_extracted_58687        | 1630  | No  | NA   | 0  | 0 | Not-determined | Genome-fragment | NA    | 0     |
| S14_vs_k141_1001571 full   | 3230  | No  | NA   | 2  | 0 | Low-quality    | Genome-fragment | 5.16  | 0     |
| S8_vs_k141_1061941 full    | 3230  | No  | NA   | 1  | 0 | Low-quality    | Genome-fragment | 1.5   | 0     |
| S12_extracted_k141_152816  | 3231  | No  | NA   | 0  | 0 | Low-quality    | Genome-fragment | 4.16  | 0     |
| S10_extracted_58835        | 3089  | No  | NA   | 0  | 4 | Not-determined | Genome-fragment | NA    | 0     |
| S10_extracted_59015        | 1175  | No  | NA   | 0  | 1 | Not-determined | Genome-fragment | NA    | 0     |
| S10_extracted_59019        | 1035  | No  | NA   | 0  | 1 | Not-determined | Genome-fragment | NA    | 0     |
| S10_extracted_59020        | 1313  | No  | NA   | 0  | 2 | Not-determined | Genome-fragment | NA    | 0     |
| S10_extracted_59260        | 1481  | No  | NA   | 0  | 0 | Not-determined | Genome-fragment | NA    | 0     |
| S10_extracted_59270        | 2404  | No  | NA   | 0  | 2 | Not-determined | Genome-fragment | NA    | 0     |
| S10_extracted_59414        | 2153  | No  | NA   | 0  | 1 | Not-determined | Genome-fragment | NA    | 0     |
| S10_extracted_59575        | 5301  | No  | NA   | 0  | 1 | Not-determined | Genome-fragment | NA    | 0     |
| S10_extracted_59712        | 2664  | No  | NA   | 0  | 2 | Not-determined | Genome-fragment | NA    | 0     |
| S10_extracted_59732        | 3423  | No  | NA   | 0  | 4 | Not-determined | Genome-fragment | NA    | 0     |
| S10_extracted_59772        | 1022  | No  | NA   | 0  | 0 | Not-determined | Genome-fragment | NA    | 0     |
| S10_extracted_59785        | 1286  | No  | NA   | 0  | 1 | Not-determined | Genome-fragment | NA    | 0     |
| S10_extracted_59839        | 1003  | No  | NA   | 0  | 2 | Not-determined | Genome-fragment | NA    | 0     |
| S10_extracted_59906        | 1071  | No  | NA   | 0  | 1 | Not-determined | Genome-fragment | NA    | 0     |
| S10_extracted_59974        | 1005  | No  | NA   | 0  | 0 | Not-determined | Genome-fragment | NA    | 0     |
| S12_vs_k141_428641 full    | 3231  | No  | NA   | 3  | 0 | Low-quality    | Genome-fragment | 9     | 0     |
| S3_vs_k141_785871 full     | 3232  | No  | NA   | 0  | 0 | Not-determined | Genome-fragment | 8.48  | 0     |
| S10_extracted_60173        | 2315  | No  | NA   | 0  | 0 | Not-determined | Genome-fragment | NA    | 0     |
| S12_vs_k141_179681 full    | 3232  | No  | NA   | 0  | 0 | Low-quality    | Genome-fragment | 5.49  | 0     |
| S10_extracted_60305        | 6711  | No  | NA   | 0  | 2 | Not-determined | Genome-fragment | NA    | 0     |
| S12_extracted_k141_188238  | 3234  | No  | NA   | 0  | 2 | Low-quality    | Genome-fragment | 0.78  | 0     |
| S10_extracted_60396        | 3184  | No  | NA   | 0  | 2 | Not-determined | Genome-fragment | NA    | 0     |
| S10_extracted_60458        | 3136  | No  | NA   | 0  | 1 | Not-determined | Genome-fragment | NA    | 0     |
| S10_extracted_3962         | 3234  | No  | NA   | 0  | 2 | Low-quality    | Genome-fragment | 1.95  | 0     |
| S10_extracted_60698        | 1014  | No  | NA   | 0  | 1 | Not-determined | Genome-fragment | NA    | 0     |
| S10_extracted_60868        | 1164  | No  | NA   | 0  | 1 | Not-determined | Genome-fragment | NA    | 0     |
| S10_extracted_60897        | 1236  | No  | NA   | 0  | 0 | Not-determined | Genome-fragment | NA    | 0     |
| S10_extracted_61048        | 1274  | No  | NA   | 0  | 1 | Not-determined | Genome-fragment | NA    | 0     |
| S10_extracted_61283        | 1465  | No  | NA   | 0  | 1 | Not-determined | Genome-fragment | NA    | 0     |
| S10_extracted_61285        | 3234  | No  | NA   | 0  | 0 | Low-quality    | Genome-fragment | 5.02  | 0     |
| S10_extracted_61547        | 4579  | No  | NA   | 0  | 3 | Not-determined | Genome-fragment | NA    | 0     |
| S7_extracted_122964        | 3235  | No  | NA   | 5  | 0 | Low-quality    | Genome-fragment | 8.13  | 0     |
| S12_vs_k141_913351 full    | 3235  | No  | NA   | 1  | 1 | Low-quality    | Genome-fragment | 5.23  | 0     |
| S17_extracted_k141_39001   | 3236  | No  | NA   | 0  | 0 | Low-quality    | Genome-fragment | 3.92  | 0     |
| S10_extracted_62075        | 1122  | No  | NA   | 0  | 0 | Not-determined | Genome-fragment | NA    | 0     |
| S10_extracted_62152        | 1871  | No  | NA   | 0  | 1 | Not-determined | Genome-fragment | NA    | 0     |
| S10_extracted_62120        | 3520  | No  | NA   | 23 | 0 | Medium-quality | Genome-fragment | 58.57 | 0     |
| S10_extracted_62255        | 1605  | No  | NA   | 0  | 1 | Not-determined | Genome-fragment | NA    | 0     |
| S10_extracted_62270        | 3909  | No  | NA   | 0  | 1 | Not-determined | Genome-fragment | NA    | 0     |
| S16_extracted_20071        | 3236  | No  | NA   | 0  | 1 | Low-quality    | Genome-fragment | 0.37  | 0     |
| S10_extracted_62358        | 1282  | No  | NA   | 0  | 1 | Not-determined | Genome-fragment | NA    | 0     |
| S10_extracted_62362        | 2144  | No  | NA   | 0  | 1 | Not-determined | Genome-fragment | NA    | 0     |
| S10_extracted_62375        | 1302  | No  | NA   | 0  | 0 | Not-determined | Genome-fragment | NA    | 0     |
| S10_extracted_62442        | 1467  | No  | NA   | 0  | 0 | Not-determined | Genome-fragment | NA    | 0     |
| S10_extracted_62508        | 2243  | No  | NA   | 0  | 2 | Not-determined | Genome-fragment | NA    | 0     |
| S16_extracted_92207        | 3236  | No  | NA   | 1  | 0 | Low-quality    | Genome-fragment | 5.46  | 0     |
| S10_extracted_62581        | 2125  | No  | NA   | 0  | 1 | Not-determined | Genome-fragment | NA    | 0     |
| S10_extracted_62597        | 3740  | No  | NA   | 0  | 1 | Not-determined | Genome-fragment | NA    | 0     |
| S16_vs_1168441 full        | 3236  | No  | NA   | 0  | 2 | Low-quality    | Genome-fragment | 0.67  | 0     |
| S10_extracted_62910        | 2170  | No  | NA   | 0  | 1 | Not-determined | Genome-fragment | NA    | 0     |
| S10_extracted_63060        | 1148  | No  | NA   | 0  | 1 | Not-determined | Genome-fragment | NA    | 0     |
| S10_extracted_63096        | 1478  | No  | NA   | 0  | 0 | Not-determined | Genome-fragment | NA    | 0     |
| S10_extracted_63105        | 3544  | No  | NA   | 0  | 2 | Not-determined | Genome-fragment | NA    | 0     |
| S10_vs_1051571 full        | 3236  | No  | NA   | 1  | 0 | Low-quality    | Genome-fragment | 2.26  | 0     |
| S10_extracted_63175        | 12157 | No  | NA   | 0  | 9 | Not-d          |                 |       |       |



|                           |       |     |    |      |   |                |                 |    |       |
|---------------------------|-------|-----|----|------|---|----------------|-----------------|----|-------|
| S10_extracted_64849       | 1158  | No  | NA | 0    | 2 | Not-determined | Genome-fragment | NA | 0     |
| S10_extracted_64884       | 1352  | No  | NA | 0    | 1 | Not-determined | Genome-fragment | NA | 0     |
| S10_extracted_64917       | 1230  | No  | NA | 0    | 0 | Not-determined | Genome-fragment | NA | 0     |
| S10_extracted_64932       | 4495  | No  | NA | 0    | 2 | Not-determined | Genome-fragment | NA | 0     |
| S10_extracted_64933       | 1312  | No  | NA | 0    | 1 | Not-determined | Genome-fragment | NA | 0     |
| S14_extracted_k141_103383 | 3238  | No  | NA | 1    | 0 | Low-quality    | Genome-fragment | NA | 6.6   |
| S10_extracted_65093       | 1297  | No  | NA | 0    | 0 | Not-determined | Genome-fragment | NA | 0     |
| S10_extracted_65116       | 1085  | No  | NA | 0    | 0 | Not-determined | Genome-fragment | NA | 0     |
| S10_extracted_65207       | 1022  | No  | NA | 0    | 0 | Not-determined | Genome-fragment | NA | 0     |
| S10_extracted_65216       | 1733  | No  | NA | 0    | 1 | Not-determined | Genome-fragment | NA | 0     |
| S10_extracted_65262       | 1022  | No  | NA | 0    | 0 | Not-determined | Genome-fragment | NA | 0     |
| S10_extracted_65311       | 6216  | No  | NA | 0    | 1 | Not-determined | Genome-fragment | NA | 0     |
| S16_extracted_143564      | 3238  | No  | NA | 1    | 0 | Low-quality    | Genome-fragment | NA | 6.63  |
| S16_vs_120846  full       | 3238  | No  | NA | 1    | 0 | Low-quality    | Genome-fragment | NA | 1.33  |
| S10_extracted_65801       | 1016  | No  | NA | 0    | 0 | Not-determined | Genome-fragment | NA | 0     |
| S10_extracted_66249       | 1016  | No  | NA | 0    | 0 | Not-determined | Genome-fragment | NA | 0     |
| S10_extracted_66257       | 1160  | No  | NA | 0    | 0 | Not-determined | Genome-fragment | NA | 0     |
| S6_vs_k141_35873  full    | 3238  | No  | NA | 0    | 2 | Low-quality    | Genome-fragment | NA | 2.28  |
| S10_extracted_66520       | 2119  | No  | NA | 0    | 1 | Not-determined | Genome-fragment | NA | 0     |
| S7_vs_12035  full         | 3239  | No  | NA | 2    | 0 | Low-quality    | Genome-fragment | NA | 8.01  |
| S12_extracted_k141_110420 | 3239  | No  | NA | 0    | 0 | Low-quality    | Genome-fragment | NA | 10.13 |
| S10_extracted_66753       | 1884  | No  | NA | 0    | 1 | Not-determined | Genome-fragment | NA | 0     |
| S10_extracted_66757       | 1047  | No  | NA | 0    | 0 | Not-determined | Genome-fragment | NA | 0     |
| S10_extracted_66827       | 4137  | No  | NA | 0    | 2 | Not-determined | Genome-fragment | NA | 0     |
| S10_extracted_66926       | 3954  | No  | NA | 0    | 0 | Not-determined | Genome-fragment | NA | 0     |
| S10_extracted_66962       | 1551  | No  | NA | 0    | 1 | Not-determined | Genome-fragment | NA | 0     |
| S14_extracted_k141_24998  | 3240  | No  | NA | 0    | 1 | Low-quality    | Genome-fragment | NA | 1.76  |
| S14_vs_k141_108288  full  | 3240  | Yes | NA | 1    | 1 | Low-quality    | Genome-fragment | NA | 3.45  |
| S10_extracted_67042       | 1065  | No  | NA | 1    | 1 | Not-determined | Genome-fragment | NA | 20.59 |
| S10_extracted_67058       | 1870  | No  | NA | 0    | 0 | Not-determined | Genome-fragment | NA | 0     |
| S10_extracted_67078       | 1665  | No  | NA | 0    | 1 | Not-determined | Genome-fragment | NA | 0     |
| S10_extracted_67236       | 1733  | No  | NA | 0    | 1 | Not-determined | Genome-fragment | NA | 0     |
| S1_extracted_k141_136901  | 3240  | No  | NA | 1    | 0 | Low-quality    | Genome-fragment | NA | 7.08  |
| S9_vs_k141_12010  full    | 3241  | No  | NA | 1    | 0 | Low-quality    | Genome-fragment | NA | 5.55  |
| S16_extracted_14201       | 3241  | No  | NA | 0    | 0 | Low-quality    | Genome-fragment | NA | 4.11  |
| S10_extracted_67685       | 1241  | No  | NA | 1    | 0 | Not-determined | Genome-fragment | NA | 0     |
| S7_extracted_18924        | 3242  | No  | NA | 1    | 0 | Low-quality    | Genome-fragment | NA | 5.9   |
| S10_extracted_67710       | 3550  | No  | NA | 0    | 2 | Not-determined | Genome-fragment | NA | 0     |
| S10_extracted_67751       | 4562  | No  | NA | 1    | 1 | Not-determined | Genome-fragment | NA | 0     |
| S10_extracted_67788       | 1019  | No  | NA | 0    | 1 | Not-determined | Genome-fragment | NA | 0     |
| S10_extracted_67943       | 2040  | No  | NA | 0    | 1 | Not-determined | Genome-fragment | NA | 0     |
| S10_extracted_67993       | 1828  | No  | NA | 0    | 1 | Not-determined | Genome-fragment | NA | 0     |
| S10_extracted_68233       | 3593  | No  | NA | 0    | 3 | Not-determined | Genome-fragment | NA | 0     |
| S10_extracted_68415       | 1316  | No  | NA | 0    | 1 | Not-determined | Genome-fragment | NA | 0     |
| S12_vs_k141_148915  full  | 3242  | No  | NA | 0    | 2 | Low-quality    | Genome-fragment | NA | 4.68  |
| S10_extracted_68571       | 1305  | No  | NA | 0    | 0 | Not-determined | Genome-fragment | NA | 0     |
| S10_extracted_68638       | 1119  | No  | NA | 0    | 0 | Not-determined | Genome-fragment | NA | 0     |
| S10_extracted_68690       | 8431  | No  | NA | 0    | 4 | Not-determined | Genome-fragment | NA | 0     |
| S10_extracted_68706       | 6144  | No  | NA | 0    | 1 | Not-determined | Genome-fragment | NA | 0     |
| S10_extracted_68726       | 2179  | No  | NA | 0    | 1 | Not-determined | Genome-fragment | NA | 0     |
| S10_extracted_68775       | 1586  | No  | NA | 0    | 0 | Not-determined | Genome-fragment | NA | 0     |
| S10_extracted_69028       | 2252  | No  | NA | 0    | 0 | Not-determined | Genome-fragment | NA | 0     |
| S14_extracted_k141_84722  | 3243  | No  | NA | 1    | 0 | Low-quality    | Genome-fragment | NA | 2.18  |
| S7_vs_23971  full         | 3244  | No  | NA | 0    | 0 | Low-quality    | Genome-fragment | NA | 2.43  |
| S16_extracted_124123      | 3244  | No  | NA | 0    | 2 | Low-quality    | Genome-fragment | NA | 1.56  |
| S10_extracted_69315       | 1082  | No  | NA | 0    | 1 | Not-determined | Genome-fragment | NA | 0     |
| S10_extracted_69372       | 1388  | No  | NA | 0    | 0 | Not-determined | Genome-fragment | NA | 0     |
| S10_extracted_69517       | 10461 | No  | NA | 0    | 2 | Not-determined | Genome-fragment | NA | 0     |
| S10_extracted_69569       | 1336  | No  | NA | 0    | 0 | Not-determined | Genome-fragment | NA | 0     |
| S10_extracted_69805       | 1057  | No  | NA | 0    | 1 | Not-determined | Genome-fragment | NA | 0     |
| S10_extracted_69850       | 1224  | No  | NA | 0    | 1 | Not-determined | Genome-fragment | NA | 0     |
| S10_extracted_70023       | 1980  | No  | NA | 0    | 6 | Not-determined | Genome-fragment | NA | 0     |
| S10_extracted_70176       | 1082  | No  | NA | 0    | 2 | Not-determined | Genome-fragment | NA | 0     |
| S16_vs_38191  full        | 3244  | Yes | NA | 1    | 1 | Low-quality    | Genome-fragment | NA | 5.03  |
| S12_vs_k141_150078  full  | 3244  | No  | NA | 2266 | 0 | Low-quality    | Genome-fragment | NA | 30.15 |
| S10_extracted_70612       | 1820  | No  | NA | 0    | 1 | Not-determined | Genome-fragment | NA | 1.4   |
| S10_extracted_70668       | 1067  | No  | NA | 0    | 0 | Not-determined | Genome-fragment | NA | 0     |
| S12_vs_k141_138100  full  | 3244  | No  | NA | 0    | 2 | Low-quality    | Genome-fragment | NA | 4.61  |
| S10_extracted_70865       | 1384  | No  | NA | 0    | 1 | Not-determined | Genome-fragment | NA | 0     |
| S10_extracted_70888       | 3490  | No  | NA | 0    | 1 | Not-determined | Genome-fragment | NA | 0     |
| S10_extracted_70889       | 1461  | No  | NA | 0    | 2 | Not-determined | Genome-fragment | NA | 0     |
| S10_extracted_71003       | 5413  | No  | NA | 0    | 1 | Not-determined | Genome-fragment | NA | 0     |
| S10_extracted_71071       | 6478  | No  | NA | 0    | 5 | Not-determined | Genome-fragment | NA | 0     |
| S10_extracted_71104       | 1223  | No  | NA | 0    | 0 | Not-determined | Genome-fragment | NA | 0     |
| S10_extracted_71158       | 1472  | No  | NA | 0    | 0 | Not-determined | Genome-fragment | NA | 0     |
| S17_vs_k141_86053  full   | 3245  | No  | NA | 0    | 0 | Low-quality    | Genome-fragment | NA | 4.12  |
| S10_extracted_71329       | 1180  | No  | NA | 0    | 2 | Not-determined | Genome-fragment | NA | 0     |
| S9_extracted_k141_83498   | 3245  | No  | NA | 3    | 0 | Low-quality    | Genome-fragment | NA | 6.9   |
| S14_vs_k141_31501  full   | 3245  | No  | NA | 0    | 0 | Low-quality    | Genome-fragment | NA | 8.56  |
| S10_extracted_71403       | 1626  | No  | NA | 0    | 1 | Not-determined | Genome-fragment | NA | 0     |
| S10_extracted_71405       | 4731  | No  | NA | 0    | 1 | Not-determined | Genome-fragment | NA | 0     |
| S10_extracted_71478       | 3355  | No  | NA | 0    | 1 | Not-determined | Genome-fragment | NA | 0     |
| S10_extracted_71513       | 3356  | No  | NA | 0    | 3 | Not-determined | Genome-fragment | NA | 0     |
| S10_extracted_71553       | 4007  | No  | NA | 0    | 2 | Not-determined | Genome-fragment | NA | 0     |
| S10_extracted_71687       | 1075  | No  | NA | 0    | 1 | Not-determined | Genome-fragment | NA | 0     |
| S1_vs_k141_94617  full    | 3245  | No  | NA | 0    | 0 | Low-quality    | Genome-fragment | NA | 5.83  |
| S10_extracted_71825       | 1209  | No  | NA | 0    | 2 | Not-determined | Genome-fragment | NA | 0     |
| S7_vs_126001  full        | 3245  | No  | NA | 0    | 2 | Low-quality    | Genome-fragment | NA | 2.62  |
| S10_extracted_71927       | 1880  | No  | NA | 0    | 1 | Not-determined | Genome-fragment | NA | 0     |
| S10_extracted_72038       | 2371  | No  | NA | 0    | 1 | Not-determined | Genome-fragment | NA | 0     |
| S10_extracted_72107       | 2653  | No  | NA | 0    | 1 | Not-determined | Genome-fragment | NA | 0     |
| S2_vs_k141_5381  full     | 3245  | No  | NA | 0    | 0 | Low-quality    | Genome-fragment | NA | 6.79  |
| S10_extracted_72226       | 1106  | No  | NA | 0    | 3 | Not-determined | Genome-fragment | NA | 0     |
| S10_extracted_72284       | 1067  | No  | NA | 0    | 0 | Not-determined | Genome-fragment | NA | 0     |
| S10_extracted_72604       | 1620  | No  | NA | 0    | 1 | Not-determined | Genome-fragment | NA | 0     |
| S8_vs_k141_32425  full    | 3245  | No  | NA | 3    | 0 | Low-quality    | Genome-fragment | NA | 10.08 |
| S10_extracted_72943       | 1438  | No  | NA | 0    | 0 | Not-determined | Genome-fragment | NA | 0     |
| S10_extracted_73047       | 1240  | No  | NA | 0    | 0 | Not-determined | Genome-fragment | NA | 0     |
| S8_vs_k141_118192  full   | 3245  | No  | NA | 0    | 0 | Low-quality    | Genome-fragment | NA | 5.28  |
| S1_vs_k141_62867  full    | 3246  | No  | NA | 0    | 0 | Low-quality    | Genome-fragment | NA | 7.76  |
| S10_extracted_73147       | 1349  | No  | NA | 0    | 1 | Not-determined | Genome-fragment | NA | 0     |
| S10_extracted_73180       | 1236  | No  | NA | 0    | 1 | Not-determined | Genome-fragment | NA | 0     |
| S10_extracted_73423       | 1064  | No  | NA | 0    | 0 | Not-determined | Genome-fragment | NA | 0     |
| S10_extracted_73441       | 1342  | No  | NA | 0    | 0 | Not-determined | Genome-fragment | NA | 0     |
| S10_extracted_73452       | 1921  | No  | NA | 0    | 2 | Not-determined | Genome-fragment | NA | 0     |
| S10_extracted_73569       | 2648  | No  | NA | 0    | 1 | Not-determined | Genome-fragment | NA | 0     |
| S3_vs_k141_124995  full   | 3247  | No  | NA | 0    | 1 | Low-quality    | Genome-fragment | NA | 1.31  |
| S5_vs_k141_115563  full   | 3247  | No  | NA | 1    | 0 | Low-quality    | Genome-fragment | NA | 7.31  |
| S10_extracted_74069       | 7177  | No  | NA | 0    | 1 | Not-determined | Genome-fragment | NA | 0     |
| S10_extracted_74222       | 1535  | No  | NA | 0    | 1 | Not-determined | Genome-fragment | NA | 0     |
| S10_extracted_74986       | 3247  | No  | NA | 0    | 0 | Low-quality    | Genome-fragment | NA | 5.03  |
| S10_vs_55034  full        | 3247  | No  | NA | 0    | 0 | Low-quality    | Genome-fragment | NA | 8.25  |
| S10_extracted_74459       | 1031  | No  | NA | 0    | 0 | Not-determined | Genome-fragment | NA | 0     |
| S10_extracted_74574       | 2924  | No  | NA | 0    | 4 | Not-determined | Genome-fragment | NA | 0     |
| S10_extracted_74602       | 1216  | No  | NA | 0    | 1 | Not-determined | Genome-fragment | NA | 0     |
| S10_extracted_74671       | 4834  | No  | NA | 0    | 3 | Not-determined | Genome-fragment | NA | 0     |
| S10_extracted_74761       | 1154  | No  | NA | 0    | 0 | Not-determined | Genome-fragment | NA | 0     |
| S10_extracted_74965       | 1010  | No  | NA | 0    | 0 | Not-determined | Genome-fragment | NA | 0     |
| S10_extracted_74986       | 2029  | No  | NA | 0    | 1 | Not-determined | Genome-fragment | NA | 0     |
| S10_extracted_75077       | 1501  | No  | NA | 0    | 2 | Not-determined | Genome-fragment | NA | 0     |
| S12_extracted_k141_152778 | 3247  | No  | NA | 0    | 2 | Low-quality    | Genome-fragment | NA | 5.41  |
| S2_vs_k141_53660  full    | 3248  | No  | NA | 0    | 0 | Low-quality    | Genome-fragment | NA | 7.02  |
| S10_extracted_75432       | 1016  | No  | NA | 0    | 1 | Not-determined | Genome-fragment | NA | 0     |
| S10_extracted_75507       | 3051  | No  | NA | 0    | 1 | Not-determined | Genome-fragment | NA | 0     |
| S7_vs_85628  full         | 2248  | No  | NA | 0    | 1 | Low-quality    | Genome-fragment | NA | 4.82  |
| S10_extracted_75917       | 1140  | No  | NA | 0    | 1 | Not-determined | Genome-fragment | NA | 0     |
| S10_extracted_75919       | 1939  | No  | NA | 0    | 1 | Not-determined | Genome-fragment | NA | 0     |
| S10_extracted_75950       | 5317  | No  | NA | 0    | 2 | Not-determined | Genome-fragment | NA | 0     |
| S10_extracted_76003       | 1256  | No  | NA | 0    | 1 | Not-determined | Genome-fragment | NA | 0     |
| S8_extracted_k141_123038  | 3249  | No  | NA | 1    | 0 | Low-quality    | Genome-fragment | NA | 3.23  |
| S10_extracted_76148       | 1097  | No  | NA | 0    | 1 | Not-determined | Genome-fragment | NA | 0     |
| S10_extracted_76187       | 1868  | No  | NA | 0    | 0 | Not-determined | Genome-fragment | NA | 0     |
| S10_extracted_76224       | 1328  | No  | NA | 0    | 0 | Not-determined | Genome-fragment | NA | 0     |
| S17_vs_k141_95284  full   | 3250  | No  | NA | 0    | 2 | Low-quality    | Genome-fragment | NA | 3.82  |
| S10_extracted_76338       | 1345  | No  | NA | 0    | 1 | Not-determined | Genome-fragment | NA | 0     |
| S10_extracted_76389       | 1585  | No  | NA | 0    | 1 | Not-determined | Genome-fragment | NA | 0     |
| S10_extracted_76647       | 1017  | No  | NA | 0    | 0 | Not-determined | Genome-fragment | NA | 0     |
| S10_extracted_76696       | 1076  | No  | NA | 0    | 1 | Not-determined | Genome-fragment | NA | 0     |
| S1_extracted_k141_10098   | 3250  | No  | NA | 0    | 2 | Low-quality    | Genome-fragment | NA | 2.35  |
| S10_extracted_76766       | 4049  | No  | NA | 0    | 4 | Not-determined | Genome-fragment | NA | 0     |
| S5_vs_k141_46230  full    | 3250  | No  | NA | 2    | 0 | Low-quality    | Genome-fragment | NA | 4.39  |
| S10_extracted_84891       | 3250  | No  | NA | 3    | 0 | Low-quality    | Genome-fragment | NA | 7.61  |
| S10_extracted_76913       | 6208  | No  | NA | 0    | 1 | Not-determined | Genome-fragment | NA | 0     |
| S10_extracted_76927       | 1255  | No  | NA | 0    | 1 | Not-determined | Genome-fragment | NA | 0     |
| S3_vs_k141_17570  full    | 3251  | No  | NA | 0    | 0 | Low-quality    | Genome-fragment | NA | 6.56  |
| S10_extracted_76951       | 1042  | No  | NA | 0    | 1 | Not-determined | Genome-fragment | NA | 0     |
| S10_extracted_77274       | 1617  | No  | NA | 0    | 0 | Not-determined | Genome-fragment | NA | 0     |
| S10_extracted_77286       | 1185  | No  | NA | 0    | 1 | Not-determined | Genome-fragment | NA | 0     |
| S10_extracted_77346       | 1635  | No  | NA | 0    | 3 | Not-determined | Genome-fragment | NA | 0     |
| S10_extracted_77666       | 3251  | No  | NA | 1    | 0 | Low-quality    | Genome          |    |       |



|                           |          |        |     |      |    |                |                 |       |       |
|---------------------------|----------|--------|-----|------|----|----------------|-----------------|-------|-------|
| S14_vs_k141_179361        | [full]   | 3254   | NA  | 2    | 0  | Low-quality    | Genome-fragment | 7.96  | 0     |
| S10_extracted_78997       |          | 3606   | NA  | 0    | 0  | Not-determined | Genome-fragment | NA    | 0     |
| S3_extracted_k141_94521   |          | 3254   | NA  | 1    | 1  | Low-quality    | Genome-fragment | 1.98  | 0     |
| S7_vs_11519               | [full]   | 3254   | NA  | 3    | 0  | Low-quality    | Genome-fragment | 6.82  | 0     |
| S16_extracted_123060      |          | 3254   | NA  | 2    | 0  | Low-quality    | Genome-fragment | 8.32  | 0     |
| S12_vs_k141_146656        | [full]   | 3254   | NA  | 0    | 0  | Low-quality    | Genome-fragment | 4.61  | 0     |
| S10_extracted_79417       |          | 1516   | NA  | 0    | 1  | Not-determined | Genome-fragment | NA    | 0     |
| S10_extracted_79450       |          | 1796   | NA  | 0    | 0  | Not-determined | Genome-fragment | NA    | 0     |
| S5_vs_k141_126117         | [full]   | 3255   | NA  | 0    | 0  | Low-quality    | Genome-fragment | 9.39  | 0     |
| S10_extracted_79495       |          | 1550   | NA  | 0    | 1  | Not-determined | Genome-fragment | NA    | 0     |
| S10_extracted_79509       |          | 1086   | NA  | 0    | 0  | Not-determined | Genome-fragment | NA    | 0     |
| S10_extracted_79534       |          | 2147   | NA  | 0    | 0  | Not-determined | Genome-fragment | NA    | 0     |
| S10_extracted_79584       |          | 10202  | NA  | 0    | 4  | Not-determined | Genome-fragment | NA    | 0     |
| S10_extracted_79659       |          | 1656   | NA  | 0    | 0  | Not-determined | Genome-fragment | NA    | 0     |
| S10_extracted_79875       |          | 2086   | NA  | 0    | 2  | Not-determined | Genome-fragment | NA    | 0     |
| S10_extracted_79917       |          | 1165   | NA  | 0    | 1  | Not-determined | Genome-fragment | NA    | 0     |
| S10_extracted_79953       |          | 1021   | NA  | 0    | 0  | Not-determined | Genome-fragment | NA    | 0     |
| S15_vs_53914              | [full]   | 3256   | NA  | 1    | 0  | Low-quality    | Genome-fragment | 4.45  | 0     |
| S10_extracted_80022       |          | 3761   | NA  | 0    | 1  | Not-determined | Genome-fragment | NA    | 0     |
| S10_extracted_80076       |          | 4041   | NA  | 0    | 2  | Not-determined | Genome-fragment | NA    | 0     |
| S10_extracted_80103       |          | 1731   | NA  | 0    | 1  | Not-determined | Genome-fragment | NA    | 0     |
| S3_extracted_k141_113348  |          | 3257   | NA  | 3    | 0  | Low-quality    | Genome-fragment | 3.7   | 0     |
| S12_extracted_k141_103803 |          | 3257   | Yes | 653  | 1  | Low-quality    | Genome-fragment | 0.7   | 79.95 |
| S10_extracted_80308       |          | 2659   | NA  | 0    | 3  | Not-determined | Genome-fragment | NA    | 0     |
| S10_extracted_80317       |          | 2511   | NA  | 0    | 1  | Not-determined | Genome-fragment | NA    | 0     |
| S10_extracted_80498       |          | 1836   | NA  | 0    | 6  | Not-determined | Genome-fragment | NA    | 0     |
| S10_extracted_80504       |          | 2946   | NA  | 0    | 1  | Not-determined | Genome-fragment | NA    | 0     |
| S5_vs_k141_33105          | [full]   | 3258   | NA  | 3    | 0  | Low-quality    | Genome-fragment | 7.44  | 0     |
| S10_extracted_80712       |          | 116981 | No  | 27   | 0  | Medium-quality | Genome-fragment | 72.67 | 0     |
| S5_vs_k141_5892           | [H2gene] | 3259   | NA  | 2    | 0  | Low-quality    | Genome-fragment | 10.74 | 0     |
| S10_extracted_80964       |          | 1413   | NA  | 0    | 2  | Not-determined | Genome-fragment | NA    | 0     |
| S10_extracted_81208       |          | 1619   | NA  | 0    | 2  | Not-determined | Genome-fragment | NA    | 0     |
| S10_extracted_81214       |          | 1784   | NA  | 0    | 1  | Not-determined | Genome-fragment | NA    | 0     |
| S10_extracted_81238       |          | 5219   | NA  | 0    | 12 | Not-determined | Genome-fragment | NA    | 0     |
| S10_extracted_81253       |          | 2811   | NA  | 0    | 2  | Not-determined | Genome-fragment | NA    | 0     |
| S10_extracted_81353       |          | 2214   | NA  | 0    | 1  | Not-determined | Genome-fragment | NA    | 0     |
| S10_extracted_81368       |          | 1010   | NA  | 0    | 0  | Not-determined | Genome-fragment | NA    | 0     |
| S12_vs_k141_150484        | [full]   | 3259   | NA  | 1    | 0  | Low-quality    | Genome-fragment | 8.77  | 0     |
| S10_extracted_81697       |          | 1424   | NA  | 0    | 2  | Not-determined | Genome-fragment | NA    | 0     |
| S10_extracted_81719       |          | 6376   | NA  | 0    | 10 | Not-determined | Genome-fragment | NA    | 0     |
| S2_vs_k141_16679          | [full]   | 3259   | NA  | 2    | 0  | Low-quality    | Genome-fragment | 8.29  | 0     |
| S10_extracted_81876       |          | 5312   | NA  | 0    | 4  | Not-determined | Genome-fragment | NA    | 0     |
| S10_extracted_82145       |          | 1086   | NA  | 0    | 1  | Not-determined | Genome-fragment | NA    | 0     |
| S14_vs_k141_28536         | [full]   | 3260   | NA  | 3    | 0  | Low-quality    | Genome-fragment | 6     | 0     |
| S10_extracted_82315       |          | 1613   | NA  | 0    | 1  | Not-determined | Genome-fragment | NA    | 0     |
| S1_vs_k141_110116         | [full]   | 3260   | NA  | 0    | 1  | Low-quality    | Genome-fragment | 2.27  | 0     |
| S8_vs_k141_12025          | [full]   | 3260   | NA  | 0    | 1  | Low-quality    | Genome-fragment | 1.9   | 0     |
| S10_extracted_82598       |          | 1275   | NA  | 0    | 0  | Not-determined | Genome-fragment | NA    | 0     |
| S10_extracted_82603       |          | 1410   | NA  | 0    | 0  | Not-determined | Genome-fragment | NA    | 0     |
| S10_extracted_82662       |          | 6839   | NA  | 0    | 0  | Not-determined | Genome-fragment | NA    | 0     |
| S10_extracted_82669       |          | 1187   | NA  | 0    | 0  | Not-determined | Genome-fragment | NA    | 0     |
| S10_extracted_82680       |          | 1482   | NA  | 0    | 2  | Not-determined | Genome-fragment | NA    | 0     |
| S10_extracted_82698       |          | 10790  | NA  | 0    | 3  | Not-determined | Genome-fragment | NA    | 0     |
| S10_extracted_82794       |          | 3979   | NA  | 0    | 1  | Not-determined | Genome-fragment | NA    | 0     |
| S10_extracted_82809       |          | 1184   | NA  | 0    | 1  | Not-determined | Genome-fragment | NA    | 0     |
| S10_extracted_82821       |          | 2005   | NA  | 0    | 0  | Not-determined | Genome-fragment | NA    | 0     |
| S10_extracted_82928       |          | 3506   | NA  | 0    | 3  | Not-determined | Genome-fragment | NA    | 0     |
| S9_extracted_k141_65310   |          | 3261   | NA  | 1    | 0  | Low-quality    | Genome-fragment | 7.81  | 0     |
| S10_extracted_83134       |          | 1212   | NA  | 0    | 3  | Not-determined | Genome-fragment | NA    | 0     |
| S10_extracted_83181       |          | 3726   | NA  | 0    | 2  | Not-determined | Genome-fragment | NA    | 0     |
| S16_vs_166165             | [full]   | 3261   | NA  | 0    | 1  | Low-quality    | Genome-fragment | 0.76  | 0     |
| S10_vs_14228              | [full]   | 3261   | NA  | 0    | 1  | Low-quality    | Genome-fragment | 1.66  | 0     |
| S1_vs_k141_88417          | [full]   | 3262   | NA  | 2    | 0  | Low-quality    | Genome-fragment | 4.25  | 0     |
| S10_extracted_83423       |          | 1737   | NA  | 0    | 0  | Not-determined | Genome-fragment | NA    | 0     |
| S10_extracted_83428       |          | 1137   | NA  | 0    | 1  | Not-determined | Genome-fragment | NA    | 0     |
| S10_extracted_83497       |          | 1444   | NA  | 0    | 0  | Not-determined | Genome-fragment | NA    | 0     |
| S10_extracted_83757       |          | 2544   | NA  | 0    | 3  | Not-determined | Genome-fragment | NA    | 0     |
| S10_extracted_84064       |          | 7153   | NA  | 0    | 5  | Not-determined | Genome-fragment | NA    | 0     |
| S10_extracted_84133       |          | 1184   | NA  | 0    | 1  | Not-determined | Genome-fragment | NA    | 0     |
| S10_extracted_84261       |          | 1443   | NA  | 0    | 1  | Not-determined | Genome-fragment | NA    | 0     |
| S10_extracted_84347       |          | 1760   | NA  | 0    | 0  | Not-determined | Genome-fragment | NA    | 0     |
| S10_extracted_84517       |          | 2033   | NA  | 0    | 1  | Not-determined | Genome-fragment | NA    | 0     |
| S10_extracted_84814       |          | 1136   | NA  | 0    | 1  | Not-determined | Genome-fragment | NA    | 0     |
| S10_extracted_83277       |          | 3262   | NA  | 0    | 3  | Low-quality    | Genome-fragment | 0.76  | 0     |
| S12_vs_k141_150723        | [full]   | 3262   | NA  | 0    | 2  | Low-quality    | Genome-fragment | NA    | 0     |
| S17_vs_k141_45650         | [full]   | 3265   | NA  | 0    | 1  | Low-quality    | Genome-fragment | 3.54  | 0     |
| S10_extracted_85111       |          | 1003   | NA  | 0    | 1  | Not-determined | Genome-fragment | NA    | 0     |
| S9_vs_k141_60749          | [full]   | 3265   | NA  | 3    | 0  | Low-quality    | Genome-fragment | 9.25  | 0     |
| S10_extracted_85243       |          | 1538   | NA  | 0    | 0  | Not-determined | Genome-fragment | NA    | 0     |
| S10_extracted_85253       |          | 1511   | NA  | 0    | 0  | Not-determined | Genome-fragment | NA    | 0     |
| S10_extracted_85334       |          | 6372   | NA  | 0    | 5  | Not-determined | Genome-fragment | NA    | 0     |
| S7_extracted_161651       |          | 3265   | Yes | 2733 | 1  | Low-quality    | Genome-fragment | 4.72  | 16.29 |
| S10_extracted_85372       |          | 1227   | NA  | 0    | 1  | Not-determined | Genome-fragment | NA    | 0     |
| S8_extracted_k141_43233   |          | 3265   | NA  | 0    | 3  | Low-quality    | Genome-fragment | 1.76  | 0     |
| S10_extracted_85510       |          | 1023   | NA  | 0    | 1  | Not-determined | Genome-fragment | NA    | 0     |
| S10_extracted_85533       |          | 1008   | NA  | 0    | 1  | Not-determined | Genome-fragment | NA    | 0     |
| S5_vs_k141_37592          | [full]   | 3267   | NA  | 3    | 0  | Low-quality    | Genome-fragment | 10.99 | 0     |
| S10_extracted_25956       |          | 3267   | NA  | 0    | 3  | Low-quality    | Genome-fragment | 0.5   | 0     |
| S10_extracted_85797       |          | 3739   | NA  | 0    | 2  | Not-determined | Genome-fragment | NA    | 0     |
| S10_vs_23666              | [full]   | 3268   | NA  | 2    | 0  | Low-quality    | Genome-fragment | 6.78  | 0     |
| S10_extracted_86016       |          | 1650   | NA  | 0    | 2  | Not-determined | Genome-fragment | NA    | 0     |
| S13_extracted_141217      |          | 3269   | NA  | 0    | 0  | Low-quality    | Genome-fragment | 9.78  | 0     |
| S10_extracted_86108       |          | 1095   | NA  | 0    | 1  | Not-determined | Genome-fragment | NA    | 0     |
| S10_extracted_86129       |          | 1243   | NA  | 0    | 1  | Not-determined | Genome-fragment | NA    | 0     |
| S10_extracted_86255       |          | 6309   | NA  | 0    | 3  | Not-determined | Genome-fragment | NA    | 0     |
| S10_extracted_86260       |          | 1303   | NA  | 0    | 0  | Not-determined | Genome-fragment | NA    | 0     |
| S13_vs_94331              | [full]   | 3269   | NA  | 1    | 0  | Low-quality    | Genome-fragment | 2     | 0     |
| S10_extracted_86392       |          | 1111   | NA  | 0    | 1  | Not-determined | Genome-fragment | NA    | 0     |
| S10_extracted_86404       |          | 1289   | NA  | 0    | 1  | Not-determined | Genome-fragment | NA    | 0     |
| S10_extracted_86428       |          | 4372   | NA  | 0    | 0  | Not-determined | Genome-fragment | NA    | 0     |
| S10_extracted_86439       |          | 1167   | NA  | 0    | 1  | Not-determined | Genome-fragment | NA    | 0     |
| S10_extracted_86451       |          | 1054   | NA  | 0    | 0  | Not-determined | Genome-fragment | NA    | 0     |
| S10_extracted_86460       |          | 2407   | NA  | 0    | 3  | Not-determined | Genome-fragment | NA    | 0     |
| S5_vs_k141_68580          | [H2gene] | 3271   | NA  | 1    | 0  | Low-quality    | Genome-fragment | 5.4   | 0     |
| S7_vs_35094               | [full]   | 3271   | Yes | 1704 | 1  | Low-quality    | Genome-fragment | 3.88  | 47.91 |
| S10_extracted_86570       |          | 1074   | NA  | 0    | 0  | Not-determined | Genome-fragment | NA    | 0     |
| S10_extracted_86653       |          | 2762   | NA  | 0    | 1  | Not-determined | Genome-fragment | NA    | 0     |
| S10_extracted_86684       |          | 1684   | NA  | 0    | 0  | Not-determined | Genome-fragment | NA    | 0     |
| S7_vs_61824               | [full]   | 3271   | NA  | 0    | 0  | Low-quality    | Genome-fragment | 2.34  | 0     |
| S10_extracted_86800       |          | 5278   | NA  | 0    | 3  | Not-determined | Genome-fragment | NA    | 0     |
| S10_extracted_86930       |          | 8895   | NA  | 0    | 4  | Not-determined | Genome-fragment | NA    | 0     |
| S10_extracted_86999       |          | 1171   | NA  | 0    | 0  | Not-determined | Genome-fragment | NA    | 0     |
| S10_extracted_87114       |          | 1203   | NA  | 0    | 4  | Not-determined | Genome-fragment | NA    | 0     |
| S10_extracted_87244       |          | 2175   | NA  | 0    | 0  | Not-determined | Genome-fragment | NA    | 0     |
| S10_extracted_87267       |          | 2154   | NA  | 0    | 0  | Not-determined | Genome-fragment | NA    | 0     |
| S10_extracted_87411       |          | 1841   | NA  | 0    | 2  | Not-determined | Genome-fragment | NA    | 0     |
| S10_extracted_116721      |          | 3271   | NA  | 0    | 3  | Low-quality    | Genome-fragment | 9.42  | 0     |
| S10_extracted_87475       |          | 1182   | NA  | 0    | 1  | Not-determined | Genome-fragment | NA    | 0     |
| S10_extracted_87500       |          | 1597   | NA  | 0    | 0  | Not-determined | Genome-fragment | NA    | 0     |
| S10_extracted_87558       |          | 1115   | NA  | 0    | 0  | Not-determined | Genome-fragment | NA    | 0     |
| S10_extracted_87685       |          | 1075   | NA  | 0    | 1  | Not-determined | Genome-fragment | NA    | 0     |
| S10_extracted_87827       |          | 1447   | NA  | 0    | 1  | Not-determined | Genome-fragment | NA    | 0     |
| S1_extracted_k141_77622   |          | 3273   | NA  | 2    | 0  | Low-quality    | Genome-fragment | 5.52  | 0     |
| S10_extracted_88371       |          | 1119   | NA  | 0    | 1  | Not-determined | Genome-fragment | NA    | 0     |
| S10_extracted_88591       |          | 3807   | NA  | 0    | 2  | Not-determined | Genome-fragment | NA    | 0     |
| S10_extracted_88636       |          | 1124   | NA  | 0    | 0  | Not-determined | Genome-fragment | NA    | 0     |
| S10_extracted_88878       |          | 1034   | NA  | 0    | 1  | Not-determined | Genome-fragment | NA    | 0     |
| S10_extracted_88973       |          | 1039   | NA  | 0    | 0  | Not-determined | Genome-fragment | NA    | 0     |
| S10_extracted_88985       |          | 1847   | NA  | 0    | 0  | Not-determined | Genome-fragment | NA    | 0     |
| S10_extracted_79492       |          | 3274   | NA  | 0    | 0  | Low-quality    | Genome-fragment | 8.33  | 0     |
| S10_extracted_89187       |          | 1891   | NA  | 0    | 2  | Not-determined | Genome-fragment | NA    | 0     |
| S10_extracted_89258       |          | 1518   | NA  | 0    | 0  | Not-determined | Genome-fragment | NA    | 0     |
| S10_extracted_89425       |          | 4198   | NA  | 0    | 3  | Not-determined | Genome-fragment | NA    | 0     |
| S10_extracted_89431       |          | 1126   | NA  | 0    | 0  | Not-determined | Genome-fragment | NA    | 0     |
| S10_extracted_89450       |          | 1079   | NA  | 0    | 1  | Not-determined | Genome-fragment | NA    | 0     |
| S10_extracted_89514       |          | 1213   | NA  | 0    | 1  | Not-determined | Genome-fragment | NA    | 0     |
| S10_extracted_89604       |          | 2257   | NA  | 0    | 2  | Not-determined | Genome-fragment | NA    | 0     |
| S10_extracted_89681       |          | 1714   | NA  | 0    | 1  | Not-determined | Genome-fragment | NA    | 0     |
| S10_extracted_89724       |          | 1198   | NA  | 0    | 1  | Not-determined | Genome-fragment | NA    | 0     |
| S10_extracted_90046       |          | 1709   | NA  | 0    | 1  | Not-determined | Genome-fragment | NA    | 0     |
| S6_extracted_k141_18649   |          | 3274   | NA  | 2    | 0  | Low-quality    | Genome-fragment | 2.51  | 0     |
| S10_extracted_90159       |          | 6811   | NA  | 0    | 2  | Not-determined | Genome-fragment | NA    | 0     |
| S10_extracted_90170       |          | 2209   | NA  | 0    | 1  | Not-determined | Genome-fragment | NA    | 0     |
| S17_vs_k141_126005        | [full]   | 3276   | NA  | 1    | 0  | Low-quality    | Genome-fragment | 1.9   | 0     |
| S10_extracted_90248       |          | 1421   | NA  | 0    | 1  | Not-determined | Genome-fragment | NA    | 0     |
| S10_extracted_90318       |          | 3211   | NA  | 0    | 3  | Not-determined | Genome-fragment | NA    | 0     |
| S10_extracted_90351       |          | 1612   | NA  | 0    | 1  | Not-determined | Genome-fragment | NA    | 0     |
| S10_extracted_90391       |          | 8205   | NA  | 0    | 0  | Not-determined | Genome-fragment | NA    | 0     |
| S10_extracted_90410       |          | 3381   | NA  | 0    | 0  | Not-determined | Genome-fragment | NA    | 0     |
| S17_vs_k141_5772          | [full]   | 3276   | NA  | 0    | 1  | Low-quality    | Genome-fragment | 3.81  | 0     |
| S10_extracted_90458       |          | 2001   | NA  | 0    | 1  | Not-determined | Genome-fragment | NA    | 0     |
| S11_vs_k141_51676         | [full]   | 3276   | NA  | 0    | 0  | Low-quality    |                 |       |       |



|                          |       |      |    |   |    |                |                 |      |       |
|--------------------------|-------|------|----|---|----|----------------|-----------------|------|-------|
| S10_extracted_91651      | 1110  | No   | NA | 0 | 0  | Not-determined | Genome-fragment | NA   | 0     |
| S10_extracted_91767      | 1370  | No   | NA | 0 | 1  | Not-determined | Genome-fragment | NA   | 0     |
| S10_extracted_91798      | 9829  | No   | NA | 0 | 5  | Not-determined | Genome-fragment | NA   | 0     |
| S10_extracted_91862      | 5523  | No   | NA | 0 | 4  | Not-determined | Genome-fragment | NA   | 0     |
| S10_extracted_91912      | 1075  | No   | NA | 0 | 0  | Not-determined | Genome-fragment | NA   | 0     |
| S10_extracted_92009      | 1580  | No   | NA | 0 | 1  | Not-determined | Genome-fragment | NA   | 0     |
| S10_extracted_92075      | 1018  | No   | NA | 0 | 0  | Not-determined | Genome-fragment | NA   | 0     |
| S10_extracted_92107      | 1043  | No   | NA | 0 | 1  | Not-determined | Genome-fragment | NA   | 0     |
| S10_extracted_92172      | 3040  | No   | NA | 0 | 2  | Not-determined | Genome-fragment | NA   | 0     |
| S10_extracted_92184      | 1574  | No   | NA | 0 | 1  | Not-determined | Genome-fragment | NA   | 0     |
| S10_extracted_92255      | 5457  | No   | NA | 0 | 4  | Not-determined | Genome-fragment | NA   | 0     |
| S10_extracted_92301      | 1448  | No   | NA | 0 | 2  | Not-determined | Genome-fragment | NA   | 0     |
| S10_extracted_92328      | 1728  | No   | NA | 0 | 3  | Not-determined | Genome-fragment | NA   | 0     |
| S10_extracted_92516      | 2421  | No   | NA | 0 | 1  | Not-determined | Genome-fragment | NA   | 0     |
| S12_vs_k141_97901[full]  | 3278  | No   | NA | 2 | 0  | Low-quality    | Genome-fragment | 8.69 | 0     |
| S10_extracted_92554      | 3115  | No   | NA | 0 | 3  | Not-determined | Genome-fragment | NA   | 0     |
| S7_vs_35244[full]        | 3279  | No   | NA | 0 | 3  | Low-quality    | Genome-fragment | 0.98 | 0     |
| S10_extracted_92804      | 5672  | No   | NA | 0 | 2  | Not-determined | Genome-fragment | NA   | 0     |
| S10_extracted_92886      | 7656  | No   | NA | 0 | 6  | Not-determined | Genome-fragment | NA   | 0     |
| S10_extracted_92931      | 1259  | No   | NA | 0 | 1  | Not-determined | Genome-fragment | NA   | 0     |
| S10_extracted_93070      | 1483  | No   | NA | 0 | 0  | Not-determined | Genome-fragment | NA   | 0     |
| S3_extracted_k141_92916  | 3281  | No   | NA | 1 | 0  | Low-quality    | Genome-fragment | 1.41 | 0     |
| S10_extracted_93127      | 1044  | No   | NA | 0 | 2  | Not-determined | Genome-fragment | NA   | 0     |
| S10_extracted_93170      | 1550  | No   | NA | 0 | 2  | Not-determined | Genome-fragment | NA   | 0     |
| S10_extracted_93218      | 1445  | No   | NA | 0 | 0  | Not-determined | Genome-fragment | NA   | 0     |
| S10_extracted_93244      | 1860  | No   | NA | 0 | 1  | Not-determined | Genome-fragment | NA   | 0     |
| S10_extracted_93266      | 1012  | No   | NA | 0 | 0  | Not-determined | Genome-fragment | NA   | 0     |
| S10_extracted_93295      | 1242  | No   | NA | 0 | 1  | Not-determined | Genome-fragment | NA   | 0     |
| S10_extracted_93365      | 2729  | No   | NA | 0 | 1  | Not-determined | Genome-fragment | NA   | 0     |
| S10_extracted_93378      | 1508  | No   | NA | 0 | 0  | Not-determined | Genome-fragment | NA   | 0     |
| S10_extracted_93459      | 1308  | No   | NA | 0 | 1  | Not-determined | Genome-fragment | NA   | 0     |
| S10_extracted_93534      | 20887 | No   | NA | 0 | 0  | Not-determined | Genome-fragment | NA   | 0     |
| S10_extracted_93764      | 4290  | No   | NA | 0 | 2  | Not-determined | Genome-fragment | NA   | 0     |
| S10_extracted_93833      | 1129  | No   | NA | 0 | 0  | Not-determined | Genome-fragment | NA   | 0     |
| S16_vs_74799[full]       | 3281  | No   | NA | 2 | 0  | Low-quality    | Genome-fragment | 7.91 | 0     |
| S10_extracted_93912      | 4340  | No   | NA | 0 | 0  | Not-determined | Genome-fragment | NA   | 0     |
| S10_extracted_94029      | 1573  | No   | NA | 0 | 1  | Not-determined | Genome-fragment | NA   | 0     |
| S10_extracted_94108      | 1174  | No   | NA | 0 | 1  | Not-determined | Genome-fragment | NA   | 0     |
| S10_extracted_94127      | 1721  | No   | NA | 0 | 0  | Not-determined | Genome-fragment | NA   | 0     |
| S10_extracted_94215      | 8402  | No   | NA | 0 | 3  | Not-determined | Genome-fragment | NA   | 0     |
| S10_extracted_94333      | 2277  | No   | NA | 0 | 2  | Not-determined | Genome-fragment | NA   | 0     |
| S13_vs_k1103[full]       | 3282  | No   | NA | 0 | 1  | Low-quality    | Genome-fragment | 2.65 | 0     |
| S10_extracted_94399      | 4179  | No   | NA | 0 | 0  | Not-determined | Genome-fragment | NA   | 0     |
| S10_extracted_94465      | 15606 | No   | NA | 0 | 3  | Not-determined | Genome-fragment | NA   | 0     |
| S10_extracted_94526      | 2027  | No   | NA | 0 | 1  | Not-determined | Genome-fragment | NA   | 0     |
| S10_extracted_94538      | 1445  | No   | NA | 0 | 0  | Not-determined | Genome-fragment | NA   | 0     |
| S5_extracted_k141_36451  | 3282  | No   | NA | 0 | 3  | Low-quality    | Genome-fragment | 0.96 | 0     |
| S16_vs_58481[full]       | 3282  | No   | NA | 2 | 0  | Low-quality    | Genome-fragment | 4.56 | 0     |
| S10_extracted_94596      | 3183  | No   | NA | 0 | 0  | Not-determined | Genome-fragment | NA   | 0     |
| S10_extracted_94660      | 2905  | No   | NA | 0 | 1  | Not-determined | Genome-fragment | NA   | 0     |
| S10_extracted_94663      | 1203  | No   | NA | 0 | 1  | Not-determined | Genome-fragment | NA   | 0     |
| S10_extracted_94873      | 1329  | No   | NA | 0 | 2  | Not-determined | Genome-fragment | NA   | 0     |
| S5_vs_k141_43137[full]   | 3283  | No   | NA | 2 | 0  | Low-quality    | Genome-fragment | 4.76 | 0     |
| S10_extracted_95093      | 5116  | No   | NA | 0 | 1  | Not-determined | Genome-fragment | NA   | 0     |
| S10_extracted_95116      | 9461  | No   | NA | 0 | 4  | Not-determined | Genome-fragment | NA   | 0     |
| S10_extracted_95135      | 10056 | No   | NA | 0 | 10 | Not-determined | Genome-fragment | NA   | 0     |
| S16_vs_1400051[full]     | 3283  | No   | NA | 0 | 0  | Low-quality    | Genome-fragment | 5.11 | 0     |
| S10_extracted_95272      | 2005  | No   | NA | 0 | 5  | Not-determined | Genome-fragment | NA   | 0     |
| S10_extracted_95352      | 1786  | No   | NA | 0 | 1  | Not-determined | Genome-fragment | NA   | 0     |
| S6_extracted_k141_4800   | 3284  | No   | NA | 0 | 1  | Low-quality    | Genome-fragment | 6.7  | 0     |
| S4_extracted_21808       | 3285  | No   | NA | 4 | 0  | Low-quality    | Genome-fragment | 5.36 | 0     |
| S7_vs_28478[full]        | 3286  | No   | NA | 0 | 0  | Low-quality    | Genome-fragment | 2.9  | 0     |
| S10_extracted_95755      | 1674  | No   | NA | 0 | 0  | Not-determined | Genome-fragment | NA   | 0     |
| S10_extracted_95766      | 5494  | No   | NA | 0 | 4  | Not-determined | Genome-fragment | NA   | 0     |
| S10_extracted_95823      | 6643  | No   | NA | 0 | 7  | Not-determined | Genome-fragment | NA   | 0     |
| S10_extracted_95973      | 1082  | No   | NA | 0 | 1  | Not-determined | Genome-fragment | NA   | 0     |
| S10_extracted_96013      | 2144  | No   | NA | 0 | 1  | Not-determined | Genome-fragment | NA   | 0     |
| S10_extracted_96056      | 1217  | No   | NA | 0 | 1  | Not-determined | Genome-fragment | NA   | 0     |
| S10_extracted_96491      | 1122  | No   | NA | 0 | 1  | Not-determined | Genome-fragment | NA   | 0     |
| S10_extracted_96604      | 1535  | No   | NA | 0 | 2  | Not-determined | Genome-fragment | NA   | 0     |
| S10_extracted_96690      | 1735  | No   | NA | 0 | 1  | Not-determined | Genome-fragment | NA   | 0     |
| S10_extracted_96769      | 1009  | No   | NA | 0 | 1  | Not-determined | Genome-fragment | NA   | 0     |
| S10_extracted_96794      | 2309  | No   | NA | 0 | 2  | Not-determined | Genome-fragment | NA   | 0     |
| S10_extracted_96908      | 1046  | No   | NA | 0 | 2  | Not-determined | Genome-fragment | NA   | 0     |
| S10_extracted_97003      | 8548  | No   | NA | 0 | 3  | Not-determined | Genome-fragment | NA   | 0     |
| S10_extracted_97163      | 2601  | No   | NA | 0 | 0  | Not-determined | Genome-fragment | NA   | 0     |
| S10_extracted_97242      | 1288  | No   | NA | 0 | 1  | Not-determined | Genome-fragment | NA   | 0     |
| S9_vs_k141_29540[full]   | 3287  | No   | NA | 0 | 0  | Low-quality    | Genome-fragment | 7.75 | 0     |
| S7_vs_106315[full]       | 3287  | No   | NA | 1 | 0  | Low-quality    | Genome-fragment | 5.46 | 0     |
| S10_extracted_97370      | 1115  | No   | NA | 0 | 1  | Not-determined | Genome-fragment | NA   | 0     |
| S10_extracted_97482      | 1901  | No   | NA | 0 | 2  | Not-determined | Genome-fragment | NA   | 0     |
| S10_extracted_97490      | 1155  | No   | NA | 0 | 2  | Not-determined | Genome-fragment | NA   | 0     |
| S10_extracted_97549      | 4977  | No   | NA | 0 | 3  | Not-determined | Genome-fragment | NA   | 0     |
| S12_vs_k141_176604[full] | 3287  | No   | NA | 0 | 1  | Low-quality    | Genome-fragment | 5.2  | 0     |
| S10_extracted_97676      | 2631  | No   | NA | 0 | 1  | Not-determined | Genome-fragment | NA   | 0     |
| S10_extracted_97757      | 5463  | No   | NA | 0 | 2  | Not-determined | Genome-fragment | NA   | 0     |
| S10_extracted_97778      | 1266  | No   | NA | 0 | 1  | Not-determined | Genome-fragment | NA   | 0     |
| S10_extracted_97805      | 3884  | No   | NA | 0 | 2  | Not-determined | Genome-fragment | NA   | 0     |
| S9_extracted_k141_14508  | 3288  | No   | NA | 0 | 0  | Low-quality    | Genome-fragment | 7.6  | 0     |
| S10_extracted_97867      | 1199  | No   | NA | 0 | 1  | Not-determined | Genome-fragment | NA   | 0     |
| S10_extracted_98029      | 1231  | No   | NA | 0 | 0  | Not-determined | Genome-fragment | NA   | 0     |
| S10_extracted_98164      | 7442  | No   | NA | 0 | 2  | Not-determined | Genome-fragment | NA   | 0     |
| S10_extracted_98187      | 1183  | No   | NA | 0 | 2  | Not-determined | Genome-fragment | NA   | 0     |
| S13_vs_90596[full]       | 3288  | No   | NA | 1 | 0  | Low-quality    | Genome-fragment | 7.78 | 0     |
| S10_extracted_98345      | 1156  | No   | NA | 0 | 0  | Not-determined | Genome-fragment | NA   | 0     |
| S16_extracted_26005      | 3288  | No   | NA | 2 | 0  | Low-quality    | Genome-fragment | 7.83 | 0     |
| S17_vs_k141_69314[full]  | 3289  | No   | NA | 0 | 1  | Low-quality    | Genome-fragment | 6.94 | 0     |
| S10_extracted_98666      | 1510  | No   | NA | 0 | 0  | Not-determined | Genome-fragment | NA   | 0     |
| S11_extracted_k141_29036 | 3289  | No   | NA | 0 | 0  | Low-quality    | Genome-fragment | 3.69 | 0     |
| S10_extracted_98737      | 7968  | No   | NA | 0 | 1  | Not-determined | Genome-fragment | NA   | 0     |
| S10_extracted_98867      | 3125  | No   | NA | 0 | 0  | Not-determined | Genome-fragment | NA   | 0     |
| S16_vs_15081[full]       | 3289  | No   | NA | 0 | 0  | Low-quality    | Genome-fragment | 6.69 | 0     |
| S10_extracted_99055      | 1163  | No   | NA | 0 | 1  | Not-determined | Genome-fragment | NA   | 0     |
| S6_vs_k141_12397[full]   | 3289  | No   | NA | 0 | 3  | Low-quality    | Genome-fragment | 6.09 | 0     |
| S10_extracted_99199      | 1164  | No   | NA | 0 | 1  | Not-determined | Genome-fragment | NA   | 0     |
| S1_extracted_k141_86371  | 3290  | No   | NA | 0 | 2  | Low-quality    | Genome-fragment | 0.49 | 0     |
| S10_extracted_99513      | 1123  | No   | NA | 0 | 1  | Not-determined | Genome-fragment | NA   | 0     |
| S10_extracted_99607      | 1525  | No   | NA | 0 | 1  | Not-determined | Genome-fragment | NA   | 0     |
| S16_vs_125136[full]      | 3290  | No   | NA | 0 | 0  | Low-quality    | Genome-fragment | 3.96 | 0     |
| S10_extracted_99675      | 1361  | No   | NA | 0 | 0  | Not-determined | Genome-fragment | NA   | 0     |
| S10_extracted_99756      | 1600  | No   | NA | 0 | 1  | Not-determined | Genome-fragment | NA   | 0     |
| S10_extracted_99783      | 3612  | No   | NA | 0 | 0  | Not-determined | Genome-fragment | NA   | 0     |
| S10_extracted_99827      | 1047  | No   | NA | 0 | 0  | Not-determined | Genome-fragment | NA   | 0     |
| S10_extracted_100197     | 3684  | No   | NA | 0 | 3  | Not-determined | Genome-fragment | NA   | 0     |
| S1_vs_k141_140583[full]  | 2291  | No   | NA | 0 | 1  | Low-quality    | Genome-fragment | 1.45 | 0     |
| S10_extracted_100755     | 1517  | No   | NA | 0 | 1  | Not-determined | Genome-fragment | NA   | 0     |
| S10_extracted_100911     | 1786  | No   | NA | 0 | 0  | Not-determined | Genome-fragment | NA   | 0     |
| S12_extracted_k141_54717 | 3291  | No   | NA | 0 | 2  | Low-quality    | Genome-fragment | 1.96 | 0     |
| S10_extracted_101007     | 3247  | No   | NA | 0 | 2  | Not-determined | Genome-fragment | NA   | 0     |
| S10_extracted_101103     | 3048  | No   | NA | 0 | 4  | Not-determined | Genome-fragment | NA   | 0     |
| S10_extracted_101129     | 5523  | No   | NA | 0 | 5  | Not-determined | Genome-fragment | NA   | 0     |
| S10_extracted_101235     | 1095  | No   | NA | 0 | 0  | Not-determined | Genome-fragment | NA   | 0     |
| S10_extracted_101350     | 1019  | No   | NA | 0 | 1  | Not-determined | Genome-fragment | NA   | 0     |
| S10_extracted_101396     | 1045  | No   | NA | 0 | 0  | Not-determined | Genome-fragment | NA   | 0     |
| S10_extracted_101523     | 2933  | No   | NA | 0 | 2  | Not-determined | Genome-fragment | NA   | 0     |
| S10_extracted_101601     | 1846  | No   | NA | 0 | 0  | Not-determined | Genome-fragment | NA   | 0     |
| S10_extracted_101655     | 1026  | No   | NA | 0 | 0  | Not-determined | Genome-fragment | NA   | 0     |
| S14_extracted_k141_10530 | 3292  | No   | NA | 0 | 3  | Low-quality    | Genome-fragment | 2.51 | 0     |
| S10_extracted_101765     | 1043  | No   | NA | 0 | 0  | Not-determined | Genome-fragment | NA   | 0     |
| S7_extracted_93093       | 3292  | No   | NA | 1 | 0  | Low-quality    | Genome-fragment | 2.5  | 0     |
| S16_vs_36873[full]       | 3292  | No   | NA | 0 | 1  | Low-quality    | Genome-fragment | 2.49 | 0     |
| S10_extracted_102040     | 1024  | No   | NA | 0 | 1  | Not-determined | Genome-fragment | NA   | 0     |
| S10_extracted_102048     | 1548  | No   | NA | 0 | 1  | Not-determined | Genome-fragment | NA   | 0     |
| S10_extracted_102098     | 3455  | No   | NA | 0 | 4  | Not-determined | Genome-fragment | NA   | 0     |
| S10_extracted_102184     | 1106  | No   | NA | 0 | 0  | Not-determined | Genome-fragment | NA   | 0     |
| S10_extracted_102204     | 2039  | No   | NA | 0 | 1  | Not-determined | Genome-fragment | NA   | 0     |
| S10_vs_112942[full]      | 3292  | Yes  | NA | 1 | 1  | Low-quality    | Genome-fragment | 4.61 | 48.63 |
| S10_extracted_102415     | 2110  | No   | NA | 0 | 1  | Not-determined | Genome-fragment | NA   | 0     |
| S17_extracted_k141_11536 | 3293  | No   | NA | 0 | 2  | Low-quality    | Genome-fragment | 1.03 | 0     |
| S10_extracted_102596     | 5520  | No   | NA | 0 | 4  | Not-determined | Genome-fragment | NA   | 0     |
| S10_extracted_102688     | 2140  | No   | NA | 0 | 6  | Not-determined | Genome-fragment | NA   | 0     |
| S10_extracted_102739     | 5273  | No   | NA | 2 | 0  | Not-determined | Genome-fragment | NA   | 0     |
| S10_extracted_102887     | 1806  | No   | NA | 0 | 2  | Not-determined | Genome-fragment | NA   | 0     |
| S5_vs_k141_31198[full]   | 3293  | No   | NA | 3 | 0  | Low-quality    | Genome-fragment | 2.42 | 0     |
| S10_extracted_102944     | 1111  | No   | NA | 0 | 1  | Not-determined | Genome-fragment | NA   | 0     |
| S10_extracted_102995     | 1202  | No   | NA | 0 | 1  | Not-determined | Genome-fragment | NA   | 0     |
| S10_extracted_103243     | 2154  | No   | NA | 0 | 2  | Not-determined | Genome-fragment | NA   | 0     |
| S10_extracted_103307     | 1098  | No   | NA | 0 | 0  | Not-determined | Genome-fragment | NA   | 0     |
| S10_extracted_103318     | 1339  | No   | NA | 0 | 1  | Not-determined | Genome-fragment | NA   | 0     |
| S10_extracted_103386     | 1065  | No   | NA | 0 | 1  | Not-determined | Genome-fragment | NA   | 0     |
| S10_extracted_103438     | 2366  | No</ |    |   |    |                |                 |      |       |



|                           |       |     |      |    |    |                |                 |    |       |       |
|---------------------------|-------|-----|------|----|----|----------------|-----------------|----|-------|-------|
| S10_extracted_105037      | 7951  | No  | NA   | 0  | 15 | Not-determined | Genome-fragment | NA | 0     | 0     |
| S4_extracted_21846        | 3296  | No  | NA   | 2  | 0  | Low-quality    | Genome-fragment | NA | 7.83  | 0     |
| S10_extracted_105107      | 1227  | No  | NA   | 0  | 0  | Not-determined | Genome-fragment | NA | 0     | 0     |
| S10_extracted_105111      | 2348  | No  | NA   | 0  | 1  | Not-determined | Genome-fragment | NA | 0     | 0     |
| S10_extracted_105203      | 1367  | No  | NA   | 0  | 1  | Not-determined | Genome-fragment | NA | 0     | 0     |
| S6_vs_k141_448841[full]   | 3296  | No  | NA   | 1  | 0  | Low-quality    | Genome-fragment | NA | 7.66  | 0     |
| S10_extracted_105261      | 3483  | No  | NA   | 0  | 2  | Not-determined | Genome-fragment | NA | 0     | 0     |
| S10_extracted_105329      | 7894  | No  | NA   | 0  | 6  | Not-determined | Genome-fragment | NA | 0     | 0     |
| S8_vs_k141_165480[full]   | 3296  | No  | NA   | 0  | 0  | Low-quality    | Genome-fragment | NA | 6.44  | 0     |
| S10_extracted_105335      | 6000  | No  | NA   | 0  | 4  | Not-determined | Genome-fragment | NA | 0     | 0     |
| S10_extracted_105336      | 1018  | No  | NA   | 0  | 1  | Not-determined | Genome-fragment | NA | 0     | 0     |
| S10_extracted_105375      | 1238  | No  | NA   | 0  | 1  | Not-determined | Genome-fragment | NA | 0     | 0     |
| S1_vs_k141_142243[full]   | 3298  | No  | NA   | 0  | 1  | Low-quality    | Genome-fragment | NA | 1.5   | 0     |
| S10_extracted_105434      | 1777  | No  | NA   | 0  | 1  | Not-determined | Genome-fragment | NA | 0     | 0     |
| S10_extracted_105498      | 1006  | No  | NA   | 0  | 1  | Not-determined | Genome-fragment | NA | 0     | 0     |
| S10_extracted_105631      | 1401  | No  | NA   | 0  | 1  | Not-determined | Genome-fragment | NA | 0     | 0     |
| S10_extracted_105689      | 2593  | No  | NA   | 0  | 2  | Not-determined | Genome-fragment | NA | 0     | 0     |
| S10_extracted_105808      | 1210  | No  | NA   | 0  | 1  | Not-determined | Genome-fragment | NA | 0     | 0     |
| S10_extracted_105938      | 1158  | No  | NA   | 0  | 3  | Not-determined | Genome-fragment | NA | 0     | 0     |
| S10_extracted_105998      | 1113  | No  | NA   | 0  | 1  | Not-determined | Genome-fragment | NA | 0     | 0     |
| S10_extracted_106035      | 6743  | No  | NA   | 0  | 3  | Not-determined | Genome-fragment | NA | 0     | 0     |
| S10_extracted_106116      | 1183  | No  | NA   | 0  | 1  | Not-determined | Genome-fragment | NA | 0     | 0     |
| S14_extracted_k141_87421  | 3299  | No  | NA   | 0  | 1  | Low-quality    | Genome-fragment | NA | 7.01  | 0     |
| S5_extracted_k141_89579   | 3299  | No  | NA   | 5  | 0  | Low-quality    | Genome-fragment | NA | 7.18  | 0     |
| S10_extracted_48870       | 3299  | No  | NA   | 0  | 0  | Low-quality    | Genome-fragment | NA | 7.09  | 0     |
| S10_extracted_106337      | 1649  | No  | NA   | 0  | 1  | Not-determined | Genome-fragment | NA | 0     | 0     |
| S10_extracted_106341      | 5379  | No  | NA   | 0  | 1  | Not-determined | Genome-fragment | NA | 0     | 0     |
| S10_extracted_106543      | 3506  | No  | NA   | 0  | 1  | Not-determined | Genome-fragment | NA | 0     | 0     |
| S10_extracted_106597      | 1551  | No  | NA   | 0  | 2  | Not-determined | Genome-fragment | NA | 0     | 0     |
| S10_extracted_106791      | 3145  | No  | NA   | 0  | 1  | Not-determined | Genome-fragment | NA | 0     | 0     |
| S11_vs_k141_93990[full]   | 3300  | No  | NA   | 0  | 2  | Low-quality    | Genome-fragment | NA | 1.68  | 0     |
| S10_extracted_107021      | 1496  | No  | NA   | 0  | 1  | Not-determined | Genome-fragment | NA | 0     | 0     |
| S10_extracted_107061      | 3938  | No  | NA   | 0  | 2  | Not-determined | Genome-fragment | NA | 0     | 0     |
| S16_extracted_18919       | 3300  | No  | NA   | 0  | 0  | Low-quality    | Genome-fragment | NA | 5.1   | 0     |
| S10_extracted_107422      | 7151  | No  | NA   | 0  | 2  | Not-determined | Genome-fragment | NA | 1.4   | 0     |
| S16_vs_151503[full]       | 3301  | No  | NA   | 0  | 1  | Low-quality    | Genome-fragment | NA | 0     | 0     |
| S10_extracted_107680      | 2398  | No  | NA   | 0  | 0  | Not-determined | Genome-fragment | NA | 0     | 0     |
| S10_extracted_107915      | 1546  | No  | NA   | 0  | 1  | Not-determined | Genome-fragment | NA | 0     | 0     |
| S8_extracted_k141_131012  | 3301  | No  | NA   | 0  | 0  | Low-quality    | Genome-fragment | NA | 4.55  | 0     |
| S10_extracted_108011      | 8728  | No  | NA   | 0  | 4  | Not-determined | Genome-fragment | NA | 0     | 0     |
| S10_extracted_108525      | 5159  | No  | NA   | 0  | 2  | Not-determined | Genome-fragment | NA | 0     | 0     |
| S10_extracted_108651      | 1295  | No  | NA   | 0  | 0  | Not-determined | Genome-fragment | NA | 0     | 0     |
| S10_extracted_108671      | 1692  | No  | NA   | 0  | 1  | Not-determined | Genome-fragment | NA | 0     | 0     |
| S8_vs_k141_199922[full]   | 3301  | No  | NA   | 0  | 2  | Low-quality    | Genome-fragment | NA | 8.49  | 0     |
| S10_extracted_108753      | 1408  | No  | NA   | 0  | 1  | Not-determined | Genome-fragment | NA | 0     | 0     |
| S10_extracted_108823      | 3661  | No  | NA   | 0  | 3  | Not-determined | Genome-fragment | NA | 0     | 0     |
| S11_vs_k141_20307[full]   | 3302  | No  | NA   | 2  | 0  | Low-quality    | Genome-fragment | NA | 6.12  | 0     |
| S10_extracted_108888      | 3480  | No  | NA   | 0  | 4  | Not-determined | Genome-fragment | NA | 0     | 0     |
| S10_extracted_109023      | 3141  | No  | NA   | 0  | 0  | Not-determined | Genome-fragment | NA | 0     | 0     |
| S10_extracted_109028      | 3123  | No  | NA   | 0  | 3  | Not-determined | Genome-fragment | NA | 0     | 0     |
| S10_extracted_109035      | 1439  | No  | NA   | 0  | 0  | Not-determined | Genome-fragment | NA | 0     | 0     |
| S10_extracted_109147      | 1516  | No  | NA   | 0  | 2  | Not-determined | Genome-fragment | NA | 0     | 0     |
| S16_extracted_11619       | 3303  | No  | NA   | 1  | 0  | Low-quality    | Genome-fragment | NA | 5.35  | 0     |
| S4_extracted_28678        | 3303  | No  | NA   | 0  | 0  | Low-quality    | Genome-fragment | NA | 6.17  | 0     |
| S10_extracted_109428      | 1311  | No  | NA   | 0  | 1  | Not-determined | Genome-fragment | NA | 0     | 0     |
| S10_extracted_109453      | 1312  | No  | NA   | 0  | 2  | Not-determined | Genome-fragment | NA | 0     | 0     |
| S3_vs_k141_63235[full]    | 3304  | No  | NA   | 1  | 0  | Low-quality    | Genome-fragment | NA | 7.27  | 0     |
| S10_extracted_109642      | 1210  | No  | NA   | 0  | 1  | Not-determined | Genome-fragment | NA | 2.89  | 0     |
| S16_vs_112375[full]       | 3304  | No  | NA   | 0  | 0  | Low-quality    | Genome-fragment | NA | 0     | 0     |
| S10_extracted_109832      | 1534  | No  | NA   | 0  | 1  | Not-determined | Genome-fragment | NA | 1.21  | 0     |
| S12_extracted_k141_120498 | 3304  | No  | NA   | 0  | 3  | Low-quality    | Genome-fragment | NA | 0     | 0     |
| S10_extracted_110295      | 2081  | No  | NA   | 0  | 2  | Not-determined | Genome-fragment | NA | 0     | 0     |
| S10_extracted_110334      | 9533  | No  | NA   | 0  | 7  | Not-determined | Genome-fragment | NA | 0     | 0     |
| S10_extracted_110500      | 1247  | No  | NA   | 0  | 1  | Not-determined | Genome-fragment | NA | 0     | 0     |
| S10_extracted_110592      | 1062  | No  | NA   | 0  | 1  | Not-determined | Genome-fragment | NA | 0     | 0     |
| S2_extracted_k141_18029   | 3304  | No  | NA   | 8  | 0  | Low-quality    | Genome-fragment | NA | 10.9  | 0     |
| S8_vs_k141_52769[full]    | 3304  | No  | NA   | 5  | 0  | Low-quality    | Genome-fragment | NA | 7.49  | 0     |
| S10_extracted_111093      | 1008  | No  | NA   | 0  | 1  | Not-determined | Genome-fragment | NA | 0     | 0     |
| S10_extracted_111100      | 1208  | No  | NA   | 0  | 1  | Not-determined | Genome-fragment | NA | 0     | 0     |
| S10_extracted_111432      | 1036  | No  | NA   | 0  | 1  | Not-determined | Genome-fragment | NA | 0     | 0     |
| S10_extracted_111462      | 1159  | No  | NA   | 0  | 0  | Not-determined | Genome-fragment | NA | 0     | 0     |
| S10_extracted_111785      | 1763  | No  | NA   | 0  | 2  | Not-determined | Genome-fragment | NA | 0     | 0     |
| S10_extracted_111907      | 1273  | No  | NA   | 0  | 2  | Not-determined | Genome-fragment | NA | 0     | 0     |
| S10_extracted_111930      | 1526  | No  | NA   | 0  | 2  | Not-determined | Genome-fragment | NA | 0     | 0     |
| S10_extracted_111933      | 1162  | No  | NA   | 0  | 3  | Not-determined | Genome-fragment | NA | 0     | 0     |
| S10_extracted_111959      | 1324  | No  | NA   | 0  | 0  | Not-determined | Genome-fragment | NA | 0     | 0     |
| S10_extracted_111967      | 1009  | No  | NA   | 0  | 0  | Not-determined | Genome-fragment | NA | 0     | 0     |
| S10_extracted_111969      | 1114  | No  | NA   | 0  | 1  | Not-determined | Genome-fragment | NA | 0     | 0     |
| S10_extracted_112016      | 1689  | No  | NA   | 0  | 2  | Not-determined | Genome-fragment | NA | 0     | 0     |
| S10_extracted_112151      | 1777  | No  | NA   | 0  | 0  | Not-determined | Genome-fragment | NA | 0     | 0     |
| S8_extracted_k141_116183  | 3305  | No  | NA   | 0  | 4  | Low-quality    | Genome-fragment | NA | 4.01  | 0     |
| S10_extracted_112333      | 1480  | No  | NA   | 0  | 1  | Not-determined | Genome-fragment | NA | 0     | 0     |
| S10_extracted_112529      | 2539  | No  | NA   | 0  | 1  | Not-determined | Genome-fragment | NA | 0     | 0     |
| S10_extracted_112600      | 1199  | No  | NA   | 0  | 1  | Not-determined | Genome-fragment | NA | 0     | 0     |
| S10_extracted_112681      | 9629  | No  | NA   | 0  | 4  | Not-determined | Genome-fragment | NA | 0     | 0     |
| S14_extracted_k141_113499 | 3306  | No  | NA   | 0  | 0  | Low-quality    | Genome-fragment | NA | 7.15  | 0     |
| S10_extracted_112957      | 1503  | No  | NA   | 0  | 1  | Not-determined | Genome-fragment | NA | 0     | 0     |
| S10_extracted_113060      | 1181  | No  | NA   | 0  | 0  | Not-determined | Genome-fragment | NA | 0     | 0     |
| S10_extracted_113133      | 1730  | No  | NA   | 0  | 2  | Not-determined | Genome-fragment | NA | 7.92  | 0     |
| S3_extracted_k141_106166  | 3306  | No  | NA   | 2  | 0  | Low-quality    | Genome-fragment | NA | 0     | 0     |
| S10_extracted_113305      | 1000  | No  | NA   | 0  | 1  | Not-determined | Genome-fragment | NA | 58.41 | 0     |
| S10_extracted_113489      | 27189 | No  | NA   | 17 | 0  | Mid-quality    | Genome-fragment | NA | 0     | 0     |
| S10_extracted_113528      | 1522  | No  | NA   | 0  | 0  | Not-determined | Genome-fragment | NA | 0     | 0     |
| S10_extracted_113589      | 3197  | No  | NA   | 0  | 2  | Not-determined | Genome-fragment | NA | 0     | 0     |
| S10_extracted_113678      | 3384  | No  | NA   | 0  | 2  | Not-determined | Genome-fragment | NA | 0     | 0     |
| S10_extracted_113840      | 1149  | No  | NA   | 0  | 2  | Not-determined | Genome-fragment | NA | 0     | 0     |
| S12_extracted_k141_17684  | 3306  | No  | NA   | 0  | 1  | Low-quality    | Genome-fragment | NA | 3.83  | 0     |
| S10_extracted_113876      | 1080  | No  | NA   | 0  | 1  | Not-determined | Genome-fragment | NA | 10.91 | 0     |
| S14_extracted_k141_17290  | 3307  | No  | NA   | 0  | 0  | Low-quality    | Genome-fragment | NA | 0     | 0     |
| S10_extracted_114077      | 2928  | No  | NA   | 0  | 3  | Not-determined | Genome-fragment | NA | 4.97  | 0     |
| S3_vs_k141_89373[full]    | 3307  | No  | NA   | 0  | 2  | Low-quality    | Genome-fragment | NA | 1.17  | 0     |
| S5_vs_k141_61612[full]    | 3307  | No  | NA   | 0  | 1  | Low-quality    | Genome-fragment | NA | 0     | 0     |
| S10_extracted_114260      | 1217  | No  | NA   | 0  | 2  | Not-determined | Genome-fragment | NA | 0     | 0     |
| S10_extracted_114338      | 4411  | No  | NA   | 0  | 3  | Not-determined | Genome-fragment | NA | 4.93  | 0     |
| S16_vs_12767[full]        | 3307  | No  | NA   | 0  | 1  | Low-quality    | Genome-fragment | NA | 1.37  | 40.37 |
| S17_vs_k141_53727[full]   | 3309  | Yes | 1973 | 1  | 1  | Low-quality    | Genome-fragment | NA | 0     | 0     |
| S10_extracted_114488      | 3436  | No  | NA   | 0  | 5  | Not-determined | Genome-fragment | NA | 0     | 0     |
| S10_extracted_114528      | 1252  | No  | NA   | 0  | 1  | Not-determined | Genome-fragment | NA | 0     | 0     |
| S10_extracted_114536      | 1784  | No  | NA   | 0  | 2  | Not-determined | Genome-fragment | NA | 0     | 0     |
| S10_extracted_114569      | 1004  | No  | NA   | 0  | 2  | Not-determined | Genome-fragment | NA | 7.69  | 0     |
| S9_extracted_k141_53738   | 3309  | No  | NA   | 1  | 0  | Low-quality    | Genome-fragment | NA | 0     | 0     |
| S10_extracted_114600      | 3811  | No  | NA   | 0  | 0  | Not-determined | Genome-fragment | NA | 0     | 0     |
| S10_extracted_114656      | 11344 | No  | NA   | 0  | 2  | Not-determined | Genome-fragment | NA | 1.97  | 0     |
| S9_extracted_k141_89369   | 3309  | No  | NA   | 0  | 0  | Low-quality    | Genome-fragment | NA | 0     | 0     |
| S10_extracted_115003      | 1238  | No  | NA   | 0  | 0  | Not-determined | Genome-fragment | NA | 0     | 0     |
| S10_extracted_115231      | 3542  | No  | NA   | 0  | 1  | Not-determined | Genome-fragment | NA | 0     | 0     |
| S10_extracted_115387      | 1172  | No  | NA   | 0  | 1  | Not-determined | Genome-fragment | NA | 5.31  | 41.13 |
| S12_vs_k1516110[partial]  | 3309  | Yes | 1948 | 1  | 1  | Low-quality    | Genome-fragment | NA | 0     | 0     |
| S10_extracted_115481      | 4023  | No  | NA   | 0  | 3  | Not-determined | Genome-fragment | NA | 0     | 0     |
| S10_extracted_115517      | 1153  | No  | NA   | 0  | 0  | Not-determined | Genome-fragment | NA | 0     | 0     |
| S10_extracted_115537      | 2716  | No  | NA   | 0  | 0  | Not-determined | Genome-fragment | NA | 2.11  | 0     |
| S5_extracted_k141_17917   | 3309  | No  | NA   | 0  | 1  | Low-quality    | Genome-fragment | NA | 0     | 0     |
| S10_extracted_115645      | 6900  | No  | NA   | 0  | 2  | Not-determined | Genome-fragment | NA | 0     | 0     |
| S10_extracted_115674      | 3333  | No  | NA   | 0  | 2  | Not-determined | Genome-fragment | NA | 0     | 0     |
| S10_extracted_115689      | 1105  | No  | NA   | 0  | 1  | Not-determined | Genome-fragment | NA | 0     | 0     |
| S10_extracted_115772      | 7141  | No  | NA   | 0  | 7  | Not-determined | Genome-fragment | NA | 0     | 0     |
| S10_extracted_115855      | 1042  | No  | NA   | 0  | 0  | Not-determined | Genome-fragment | NA | 1.42  | 0     |
| S10_extracted_116023      | 4285  | No  | NA   | 0  | 1  | Not-determined | Genome-fragment | NA | 0     | 0     |
| S10_extracted_116092      | 1225  | No  | NA   | 0  | 1  | Not-determined | Genome-fragment | NA | 0     | 0     |
| S17_vs_k141_29323[full]   | 3310  | No  | NA   | 0  | 0  | Low-quality    | Genome-fragment | NA | 0     | 0     |
| S10_extracted_116405      | 1230  | No  | NA   | 0  | 1  | Not-determined | Genome-fragment | NA | 0     | 0     |
| S10_extracted_116448      | 3652  | No  | NA   | 0  | 2  | Not-determined | Genome-fragment | NA | 0     | 0     |
| S10_extracted_116516      | 3045  | No  | NA   | 0  | 0  | Not-determined | Genome-fragment | NA | 0     | 0     |
| S10_extracted_116551      | 1804  | No  | NA   | 0  | 0  | Not-determined | Genome-fragment | NA | 1.74  | 0     |
| S10_extracted_116709      | 1146  | No  | NA   | 0  | 2  | Not-determined | Genome-fragment | NA | 0     | 0     |
| S3_vs_k141_17207[full]    | 3310  | No  | NA   | 1  | 0  | Low-quality    | Genome-fragment | NA | 4.47  | 0     |
| S10_extracted_116734      | 1361  | No  | NA   | 0  | 1  | Not-determined | Genome-fragment | NA | 1.93  | 0     |
| S10_extracted_116743      | 1151  | No  | NA   | 0  | 1  | Not-determined | Genome-fragment | NA | 2.16  | 0     |
| S10_extracted_116762      | 1763  | No  |      |    |    |                |                 |    |       |       |



|                             |        |     |      |    |   |                |                 |    |       |       |
|-----------------------------|--------|-----|------|----|---|----------------|-----------------|----|-------|-------|
| S10_extracted_120620        | 3103   | No  | NA   | 0  | 0 | Not-determined | Genome-fragment | NA | 0     | 0     |
| S10_extracted_120683        | 2041   | No  | NA   | 0  | 0 | Not-determined | Genome-fragment | NA | 0     | 0     |
| S10_extracted_120738        | 138855 | No  | NA   | 37 | 6 | Complete       | High-quality    | NA | 100   | 0     |
| S10_extracted_120762        | 3616   | No  | NA   | 0  | 1 | Not-determined | Genome-fragment | NA | 0     | 0     |
| S10_extracted_120913        | 1025   | No  | NA   | 0  | 2 | Not-determined | Genome-fragment | NA | 0     | 0     |
| S10_extracted_120918        | 1020   | No  | NA   | 0  | 0 | Not-determined | Genome-fragment | NA | 0     | 0     |
| S10_extracted_120958        | 1088   | No  | NA   | 0  | 1 | Not-determined | Genome-fragment | NA | 0     | 0     |
| S10_extracted_120981        | 1070   | No  | NA   | 0  | 1 | Not-determined | Genome-fragment | NA | 0     | 0     |
| S5_extracted_k141_135643    | 3313   | No  | NA   | 0  | 1 | Low-quality    | Genome-fragment | NA | 0.94  | 0     |
| S10_extracted_121015        | 3071   | No  | NA   | 0  | 1 | Not-determined | Genome-fragment | NA | 0     | 0     |
| S10_extracted_121047        | 1137   | No  | NA   | 0  | 1 | Not-determined | Genome-fragment | NA | 0     | 0     |
| S5_vs_k141_27838  full      | 3313   | No  | NA   | 0  | 0 | Low-quality    | Genome-fragment | NA | 7.57  | 0     |
| S11_extracted_k141_118736   | 3314   | No  | NA   | 4  | 0 | Low-quality    | Genome-fragment | NA | 5.26  | 0     |
| S10_vs_23835  full          | 4326   | No  | NA   | 0  | 0 | Not-determined | Genome-fragment | NA | 0     | 0     |
| S10_vs_14473  full          | 5985   | No  | NA   | 4  | 0 | High-quality   | High-quality    | NA | 98.05 | 0     |
| S10_vs_120489  full         | 3402   | No  | NA   | 1  | 1 | High-quality   | High-quality    | NA | 93.7  | 0     |
| S10_vs_120541  full         | 39544  | No  | NA   | 21 | 1 | High-quality   | High-quality    | NA | 99.08 | 0     |
| S10_vs_120570  full         | 35054  | No  | NA   | 20 | 0 | High-quality   | High-quality    | NA | 99.04 | 0     |
| S16_vs_46344  full          | 3315   | No  | NA   | 1  | 0 | Low-quality    | Genome-fragment | NA | 7.69  | 0     |
| S6_vs_k141_52005  full      | 3315   | No  | NA   | 0  | 0 | Low-quality    | Genome-fragment | NA | 5.53  | 0     |
| S8_extracted_k141_59299     | 3315   | No  | NA   | 1  | 0 | Low-quality    | Genome-fragment | NA | 5.27  | 0     |
| S10_vs_55  full             | 1772   | No  | NA   | 0  | 0 | Not-determined | Genome-fragment | NA | 0     | 0     |
| S10_vs_206  full            | 2676   | No  | NA   | 0  | 3 | Not-determined | Genome-fragment | NA | 0     | 0     |
| S10_vs_231  full            | 2739   | No  | NA   | 0  | 0 | Not-determined | Genome-fragment | NA | 0     | 0     |
| S10_vs_258  full            | 6180   | No  | NA   | 0  | 4 | Not-determined | Genome-fragment | NA | 0     | 0     |
| S10_vs_379  full            | 1724   | No  | NA   | 0  | 2 | Not-determined | Genome-fragment | NA | 0     | 0     |
| S17_vs_k141_51851  full     | 3316   | No  | NA   | 0  | 3 | Low-quality    | Genome-fragment | NA | 0.91  | 0     |
| S16_extracted_1844          | 3316   | No  | NA   | 0  | 0 | Low-quality    | Genome-fragment | NA | 2.12  | 0     |
| S10_vs_18423  full          | 3317   | No  | NA   | 0  | 0 | Low-quality    | Genome-fragment | NA | 6.64  | 0     |
| S10_vs_967  full            | 14615  | No  | NA   | 0  | 8 | Not-determined | Genome-fragment | NA | 0     | 0     |
| S3_extracted_k141_97244     | 3318   | No  | NA   | 0  | 0 | Low-quality    | Genome-fragment | NA | 11.5  | 0     |
| S5_extracted_k141_53363     | 3318   | No  | NA   | 0  | 0 | Low-quality    | Genome-fragment | NA | 6.91  | 0     |
| S7_vs_134053  full          | 3318   | No  | NA   | 0  | 3 | Low-quality    | Genome-fragment | NA | 1.6   | 0     |
| S8_extracted_k141_201967    | 3318   | No  | NA   | 0  | 0 | Low-quality    | Genome-fragment | NA | 2.06  | 0     |
| S13_extracted_15296         | 3319   | No  | NA   | 1  | 0 | Low-quality    | Genome-fragment | NA | 4.84  | 0     |
| S10_vs_1441  full           | 3154   | No  | NA   | 0  | 1 | Not-determined | Genome-fragment | NA | 0     | 0     |
| S10_vs_1468  full           | 1645   | No  | NA   | 0  | 0 | Not-determined | Genome-fragment | NA | 0     | 0     |
| S10_vs_1476  full           | 2297   | No  | NA   | 0  | 2 | Not-determined | Genome-fragment | NA | 0     | 0     |
| S10_vs_1493  full           | 2112   | No  | NA   | 0  | 2 | Not-determined | Genome-fragment | NA | 0     | 0     |
| S10_vs_1496  full           | 2956   | No  | NA   | 0  | 2 | Not-determined | Genome-fragment | NA | 0     | 0     |
| S10_vs_1583  full           | 3591   | No  | NA   | 0  | 1 | Not-determined | Genome-fragment | NA | 0     | 0     |
| S5_extracted_k141_20987     | 3319   | No  | NA   | 0  | 0 | Low-quality    | Genome-fragment | NA | 2.34  | 0     |
| S7_vs_121520  full          | 3319   | No  | NA   | 1  | 0 | Low-quality    | Genome-fragment | NA | 5.68  | 0     |
| S10_extracted_21865         | 3319   | No  | NA   | 0  | 2 | Low-quality    | Genome-fragment | NA | 4     | 0     |
| S5_extracted_k141_63722     | 3320   | No  | NA   | 2  | 0 | Low-quality    | Genome-fragment | NA | 7.4   | 0     |
| S10_vs_1963  full           | 2426   | No  | NA   | 3  | 3 | Not-determined | Genome-fragment | NA | 0     | 0     |
| S16_extracted_152346        | 3320   | No  | NA   | 0  | 2 | Low-quality    | Genome-fragment | NA | 1.03  | 0     |
| S10_vs_2071  full           | 2381   | No  | NA   | 0  | 1 | Not-determined | Genome-fragment | NA | 0     | 0     |
| S7_vs_113813  full          | 3321   | No  | NA   | 0  | 0 | Low-quality    | Genome-fragment | NA | 8.17  | 0     |
| S10_vs_2115  full           | 6220   | No  | NA   | 0  | 5 | Not-determined | Genome-fragment | NA | 0     | 0     |
| S16_extracted_95246         | 3321   | No  | NA   | 0  | 1 | Low-quality    | Genome-fragment | NA | 7.78  | 0     |
| S8_vs_k141_187927  full     | 2322   | Yes | 1324 | 2  | 0 | Low-quality    | Genome-fragment | NA | 2.65  | 60.14 |
| S10_vs_2434  full           | 9043   | No  | NA   | 0  | 1 | Not-determined | Genome-fragment | NA | 0     | 0     |
| S16_extracted_88367         | 3323   | No  | NA   | 3  | 0 | Low-quality    | Genome-fragment | NA | 10.33 | 0     |
| S10_vs_2499  full           | 7612   | No  | NA   | 0  | 0 | Not-determined | Genome-fragment | NA | 0     | 0     |
| S10_vs_2538  full           | 3212   | No  | NA   | 19 | 3 | High-quality   | High-quality    | NA | 93.27 | 0     |
| S6_vs_k141_18483  full      | 3323   | No  | NA   | 2  | 0 | Low-quality    | Genome-fragment | NA | 6.95  | 0     |
| S11_vs_k141_22406  full     | 3324   | Yes | 1607 | 1  | 1 | Low-quality    | Genome-fragment | NA | 1.81  | 51.85 |
| S11_vs_k141_56732  full     | 3324   | Yes | 2549 | 1  | 0 | Low-quality    | Genome-fragment | NA | 1.58  | 23.32 |
| S7_vs_89621  full           | 3324   | No  | NA   | 0  | 0 | Low-quality    | Genome-fragment | NA | 6.15  | 0     |
| S10_vs_2961  full           | 2513   | No  | NA   | 0  | 2 | Not-determined | Genome-fragment | NA | 0     | 0     |
| S11_vs_k141_6809  full      | 3325   | No  | NA   | 0  | 0 | Low-quality    | Genome-fragment | NA | 7.71  | 0     |
| S1_vs_k141_25971  full      | 3325   | No  | NA   | 0  | 0 | Low-quality    | Genome-fragment | NA | 9.95  | 0     |
| S14_vs_k141_104887  full    | 3326   | No  | NA   | 2  | 0 | Low-quality    | Genome-fragment | NA | 5.35  | 0     |
| S10_vs_3447  full           | 2154   | No  | NA   | 3  | 3 | Not-determined | Genome-fragment | NA | 0     | 0     |
| S10_vs_3456  full           | 2887   | No  | NA   | 0  | 0 | Not-determined | Genome-fragment | NA | 0     | 0     |
| S10_vs_3473  full           | 3172   | No  | NA   | 0  | 1 | Not-determined | Genome-fragment | NA | 0     | 0     |
| S16_extracted_39751         | 3326   | No  | NA   | 2  | 0 | Low-quality    | Genome-fragment | NA | 9.59  | 0     |
| S10_vs_3629  full           | 2647   | No  | NA   | 3  | 3 | Not-determined | Genome-fragment | NA | 0     | 0     |
| S10_vs_3666  full           | 6555   | No  | NA   | 0  | 3 | Not-determined | Genome-fragment | NA | 0     | 0     |
| S10_vs_3691  full           | 13880  | No  | NA   | 0  | 2 | Not-determined | Genome-fragment | NA | 0     | 0     |
| S10_vs_3702  full           | 2076   | No  | NA   | 0  | 0 | Not-determined | Genome-fragment | NA | 0     | 0     |
| S16_extracted_142010        | 3326   | No  | NA   | 0  | 2 | Low-quality    | Genome-fragment | NA | 1.53  | 0     |
| S10_vs_3751  full           | 1211   | No  | NA   | 0  | 1 | Not-determined | Genome-fragment | NA | 0     | 0     |
| S11_extracted_k141_4077     | 3327   | No  | NA   | 7  | 0 | Low-quality    | Genome-fragment | NA | 5.47  | 0     |
| S7_extracted_121167         | 3327   | No  | NA   | 3  | 0 | Low-quality    | Genome-fragment | NA | 5.65  | 0     |
| S17_extracted_k141_102361   | 3328   | No  | NA   | 0  | 4 | Low-quality    | Genome-fragment | NA | 8.49  | 0     |
| S11_vs_k141_1176  full      | 3328   | No  | NA   | 0  | 2 | Low-quality    | Genome-fragment | NA | 4.44  | 0     |
| S1_vs_k141_106959  H2genome | 3328   | No  | NA   | 0  | 3 | Not-determined | Genome-fragment | NA | 6.23  | 0     |
| S5_vs_k141_122368  full     | 3328   | No  | NA   | 1  | 0 | Low-quality    | Genome-fragment | NA | 5.72  | 0     |
| S10_vs_4134  full           | 14764  | No  | NA   | 0  | 3 | Not-determined | Genome-fragment | NA | 0     | 0     |
| S10_vs_4123  full           | 8886   | No  | NA   | 2  | 2 | Not-determined | Genome-fragment | NA | 0     | 0     |
| S12_extracted_k141_150001   | 3328   | No  | NA   | 1  | 0 | Low-quality    | Genome-fragment | NA | 5.36  | 0     |
| S1_extracted_k141_63765     | 3329   | No  | NA   | 2  | 0 | Low-quality    | Genome-fragment | NA | 7.28  | 0     |
| S17_extracted_k141_77861    | 3330   | No  | NA   | 0  | 0 | Low-quality    | Genome-fragment | NA | 7.14  | 0     |
| S10_vs_4624  full           | 8629   | No  | NA   | 0  | 5 | Not-determined | Genome-fragment | NA | 0     | 0     |
| S10_vs_4627  full           | 2673   | No  | NA   | 0  | 0 | Not-determined | Genome-fragment | NA | 0     | 0     |
| S6_vs_k141_1772  full       | 3330   | No  | NA   | 0  | 1 | Low-quality    | Genome-fragment | NA | 1.1   | 0     |
| S9_extracted_k141_78000     | 3331   | No  | NA   | 0  | 0 | Low-quality    | Genome-fragment | NA | 1.38  | 0     |
| S13_vs_45953  full          | 3331   | No  | NA   | 0  | 1 | Low-quality    | Genome-fragment | NA | 4.3   | 0     |
| S10_vs_4790  full           | 1415   | No  | NA   | 0  | 1 | Not-determined | Genome-fragment | NA | 0     | 0     |
| S10_vs_4812  full           | 1028   | No  | NA   | 0  | 1 | Not-determined | Genome-fragment | NA | 0     | 0     |
| S10_vs_5173  full           | 1586   | No  | NA   | 0  | 2 | Not-determined | Genome-fragment | NA | 0     | 0     |
| S10_vs_5177  full           | 1885   | No  | NA   | 0  | 0 | Not-determined | Genome-fragment | NA | 0     | 0     |
| S1_extracted_k141_19352     | 3331   | No  | NA   | 0  | 0 | Low-quality    | Genome-fragment | NA | 3.37  | 0     |
| S7_extracted_1266           | 3331   | Yes | 2212 | 2  | 1 | Low-quality    | Genome-fragment | NA | 5.98  | 33.59 |
| S12_vs_k141_14373  full     | 3331   | No  | NA   | 0  | 3 | Low-quality    | Genome-fragment | NA | 4.52  | 0     |
| S17_vs_k141_33745  full     | 3332   | No  | NA   | 0  | 2 | Low-quality    | Genome-fragment | NA | 1.72  | 0     |
| S10_vs_5608  full           | 1723   | No  | NA   | 0  | 2 | Not-determined | Genome-fragment | NA | 0     | 0     |
| S10_vs_5632  full           | 4615   | No  | NA   | 0  | 0 | Not-determined | Genome-fragment | NA | 0     | 0     |
| S10_vs_5825  full           | 1777   | No  | NA   | 0  | 1 | Not-determined | Genome-fragment | NA | 0     | 0     |
| S10_vs_5924  full           | 2543   | No  | NA   | 0  | 1 | Not-determined | Genome-fragment | NA | 0     | 0     |
| S10_vs_5982  full           | 3676   | No  | NA   | 0  | 2 | Not-determined | Genome-fragment | NA | 0     | 0     |
| S3_extracted_k141_115965    | 3332   | No  | NA   | 0  | 0 | Low-quality    | Genome-fragment | NA | 5.83  | 0     |
| S10_vs_6015  full           | 2556   | No  | NA   | 0  | 1 | Not-determined | Genome-fragment | NA | 0     | 0     |
| S12_extracted_k141_49926    | 3332   | No  | NA   | 3  | 0 | Low-quality    | Genome-fragment | NA | 9.55  | 0     |
| S10_vs_6557  full           | 2184   | No  | NA   | 0  | 2 | Not-determined | Genome-fragment | NA | 0     | 0     |
| S8_vs_k141_125930  full     | 3332   | No  | NA   | 0  | 3 | Low-quality    | Genome-fragment | NA | 2.38  | 0     |
| S10_vs_6613  full           | 2166   | No  | NA   | 0  | 1 | Not-determined | Genome-fragment | NA | 0     | 0     |
| S10_vs_6660  full           | 15085  | No  | NA   | 0  | 2 | Not-determined | Genome-fragment | NA | 0     | 0     |
| S7_vs_112910  full          | 3333   | No  | NA   | 1  | 0 | Low-quality    | Genome-fragment | NA | 8.29  | 0     |
| S10_vs_6867  full           | 2110   | No  | NA   | 0  | 0 | Not-determined | Genome-fragment | NA | 0     | 0     |
| S10_vs_7020  full           | 1715   | No  | NA   | 0  | 2 | Not-determined | Genome-fragment | NA | 0     | 0     |
| S16_extracted_121258        | 3333   | No  | NA   | 0  | 2 | Low-quality    | Genome-fragment | NA | 1.57  | 0     |
| S10_vs_7050  full           | 1625   | No  | NA   | 0  | 0 | Not-determined | Genome-fragment | NA | 0     | 0     |
| S10_vs_7218  full           | 2286   | No  | NA   | 0  | 1 | Not-determined | Genome-fragment | NA | 0     | 0     |
| S16_vs_56871  full          | 3334   | No  | NA   | 1  | 0 | Low-quality    | Genome-fragment | NA | 5.16  | 0     |
| S10_vs_7263  full           | 3623   | No  | NA   | 0  | 0 | Not-determined | Genome-fragment | NA | 0     | 0     |
| S10_vs_7387  full           | 1579   | No  | NA   | 0  | 0 | Not-determined | Genome-fragment | NA | 0     | 0     |
| S10_vs_7393  full           | 2554   | No  | NA   | 0  | 1 | Not-determined | Genome-fragment | NA | 0     | 0     |
| S8_extracted_k141_156322    | 3334   | No  | NA   | 1  | 0 | Low-quality    | Genome-fragment | NA | 7.65  | 0     |
| S17_vs_k141_54620  full     | 3335   | No  | NA   | 0  | 1 | Low-quality    | Genome-fragment | NA | 1.84  | 0     |
| S10_vs_7579  full           | 2829   | No  | NA   | 0  | 0 | Not-determined | Genome-fragment | NA | 0     | 0     |
| S9_vs_k141_68666  full      | 3335   | No  | NA   | 0  | 3 | Low-quality    | Genome-fragment | NA | 1.14  | 0     |
| S11_extracted_k141_15108    | 3335   | No  | NA   | 0  | 0 | Low-quality    | Genome-fragment | NA | 7.63  | 0     |
| S1_extracted_k141_66810     | 3335   | No  | NA   | 2  | 0 | Low-quality    | Genome-fragment | NA | 7.33  | 0     |
| S5_vs_k141_2017  full       | 3335   | No  | NA   | 5  | 0 | Low-quality    | Genome-fragment | NA | 5.5   | 0     |
| S16_vs_7064  full           | 3335   | No  | NA   | 0  | 0 | Low-quality    | Genome-fragment | NA | 10.34 | 0     |
| S10_vs_7850  full           | 4701   | No  | NA   | 0  | 2 | Not-determined | Genome-fragment | NA | 0     | 0     |
| S10_vs_7901  full           | 1253   | No  | NA   | 0  | 0 | Not-determined | Genome-fragment | NA | 0     | 0     |
| S12_vs_k141_39092  full     | 3335   | No  | NA   | 0  | 2 | Low-quality    | Genome-fragment | NA | 2.42  | 0     |
| S5_extracted_k141_27872     | 3336   | No  | NA   | 1  | 0 | Low-quality    | Genome-fragment | NA | 6.08  | 0     |
| S10_vs_8106  full           | 2258   | No  | NA   | 0  | 1 | Not-determined | Genome-fragment | NA | 0     | 0     |
| S10_vs_8199  full           | 1075   | No  | NA   | 0  | 0 | Not-determined | Genome-fragment | NA | 0     | 0     |
| S10_vs_77151  full          | 3336   | No  | NA   | 0  | 0 | Low-quality    | Genome-fragment | NA | 4.18  | 0     |
| S4_extracted_2966           | 3336   | No  | NA   | 1  | 0 | Low-quality    | Genome-fragment | NA | 7.37  | 0     |
| S10_vs_8616  full           | 1254   | No  | NA   | 0  | 0 | Not-determined | Genome-fragment | NA | 0     | 0     |
| S10_vs_8722  full           | 2419   | No  | NA   | 0  | 1 | Not-determined | Genome-fragment | NA |       |       |



|                           |        |       |     |      |      |    |                |                 |       |       |
|---------------------------|--------|-------|-----|------|------|----|----------------|-----------------|-------|-------|
| S16_v2_20027              | [full] | 3345  | No  | NA   | 1    | 0  | Low-quality    | Genome-fragment | 5.13  | 0     |
| S10_v2_13251              | [full] | 1299  | No  | NA   | 0    | 0  | Not-determined | Genome-fragment | NA    | 0     |
| S9_v2_k141_78509          | [full] | 3346  | No  | NA   | 0    | 2  | Low-quality    | Genome-fragment | 3.93  | 0     |
| S10_v2_13486              | [full] | 9103  | No  | NA   | 0    | 2  | Not-determined | Genome-fragment | NA    | 0     |
| S10_v2_13511              | [full] | 1901  | No  | NA   | 0    | 0  | Not-determined | Genome-fragment | NA    | 0     |
| S10_v2_13567              | [full] | 2113  | No  | NA   | 0    | 2  | Not-determined | Genome-fragment | NA    | 0     |
| S5_v2_k141_86624          | [full] | 3346  | No  | NA   | 1    | 0  | Low-quality    | Genome-fragment | 4.04  | 0     |
| S12_v2_k141_48402         | [full] | 3346  | No  | NA   | 0    | 0  | Low-quality    | Genome-fragment | 3.07  | 0     |
| S10_v2_13705              | [full] | 2742  | No  | NA   | 0    | 2  | Not-determined | Genome-fragment | NA    | 0     |
| S10_v2_13744              | [full] | 7347  | No  | NA   | 0    | 3  | Not-determined | Genome-fragment | NA    | 0     |
| S1_v2_k141_8822           | [full] | 3348  | No  | NA   | 2    | 0  | Low-quality    | Genome-fragment | 7.37  | 0     |
| S12_extracted_k141_4125   |        | 3348  | No  | NA   | 0    | 0  | Low-quality    | Genome-fragment | 5.48  | 0     |
| S10_v2_13828              | [full] | 2123  | No  | NA   | 0    | 0  | Not-determined | Genome-fragment | NA    | 0     |
| S10_v2_14001              | [full] | 10480 | No  | NA   | 0    | 4  | Not-determined | Genome-fragment | NA    | 0     |
| S10_v2_14041              | [full] | 2883  | No  | NA   | 0    | 2  | Not-determined | Genome-fragment | NA    | 0     |
| S12_v2_k141_46092         | [full] | 3348  | No  | NA   | 1    | 0  | Low-quality    | Genome-fragment | 4.32  | 0     |
| S10_v2_14332              | [full] | 1187  | No  | NA   | 0    | 1  | Not-determined | Genome-fragment | NA    | 0     |
| S10_v2_14557              | [full] | 93657 | Yes | NA   | 4    | 43 | Complete       | High-quality    | 100   | 55.45 |
| S5_extracted_k141_47984   |        | 2349  | No  | NA   | 1    | 1  | Low-quality    | Genome-fragment | 2.09  | 0     |
| S16_v2_114793             | [full] | 3349  | No  | NA   | 0    | 0  | Low-quality    | Genome-fragment | 9.58  | 0     |
| S10_v2_64376              | [full] | 3349  | No  | NA   | 0    | 0  | Low-quality    | Genome-fragment | 5.29  | 0     |
| S12_v2_k141_135641        | [full] | 3349  | No  | NA   | 1    | 0  | Low-quality    | Genome-fragment | 9.27  | 0     |
| S11_v2_k141_37589         | [full] | 3350  | No  | NA   | 0    | 1  | Low-quality    | Genome-fragment | 2.42  | 0     |
| S11_extracted_k141_58239  |        | 3352  | No  | NA   | 0    | 2  | Low-quality    | Genome-fragment | 0.92  | 0     |
| S10_v2_14949              | [full] | 1058  | No  | NA   | 0    | 0  | Not-determined | Genome-fragment | NA    | 0     |
| S10_v2_14988              | [full] | 8039  | No  | NA   | 0    | 3  | Not-determined | Genome-fragment | NA    | 0     |
| S10_v2_14991              | [full] | 1885  | No  | NA   | 0    | 0  | Not-determined | Genome-fragment | NA    | 0     |
| S8_v2_k141_199706         | [full] | 3352  | No  | NA   | 0    | 3  | Low-quality    | Genome-fragment | 8.88  | 0     |
| S17_extracted_k141_59027  |        | 3353  | No  | NA   | 0    | 0  | Low-quality    | Genome-fragment | 5.03  | 0     |
| S10_v2_15248              | [full] | 2541  | No  | NA   | 0    | 1  | Not-determined | Genome-fragment | NA    | 0     |
| S16_v2_139805             | [full] | 3353  | No  | NA   | 0    | 2  | Low-quality    | Genome-fragment | 1.56  | 0     |
| S10_v2_15433              | [full] | 2416  | No  | NA   | 1    | 1  | Not-determined | Genome-fragment | NA    | 0     |
| S8_extracted_k141_27760   |        | 3353  | No  | NA   | 0    | 0  | Low-quality    | Genome-fragment | 2.09  | 0     |
| S8_v2_k141_41920          | [full] | 3353  | No  | NA   | 0    | 0  | Low-quality    | Genome-fragment | 9.59  | 0     |
| S9_v2_k141_73522          | [full] | 3354  | No  | NA   | 0    | 0  | Low-quality    | Genome-fragment | 5.41  | 0     |
| S10_v2_15639              | [full] | 1672  | No  | NA   | 1    | 1  | Not-determined | Genome-fragment | NA    | 0     |
| S10_v2_15642              | [full] | 9849  | No  | NA   | 0    | 2  | Not-determined | Genome-fragment | NA    | 0     |
| S1_v2_k141_54351          | [full] | 3354  | No  | NA   | 0    | 0  | Low-quality    | Genome-fragment | 8.71  | 0     |
| S10_v2_15760              | [full] | 9250  | No  | NA   | 5    | 5  | Not-determined | Genome-fragment | NA    | 0     |
| S1_v2_k141_45760          | [full] | 3354  | No  | NA   | 2    | 0  | Low-quality    | Genome-fragment | 5.11  | 0     |
| S10_v2_15960              | [full] | 1090  | No  | NA   | 0    | 1  | Not-determined | Genome-fragment | NA    | 0     |
| S4_extracted_20878        |        | 3355  | No  | NA   | 0    | 0  | Low-quality    | Genome-fragment | 7.47  | 0     |
| S10_v2_16182              | [full] | 1230  | No  | NA   | 0    | 1  | Not-determined | Genome-fragment | NA    | 0     |
| S10_v2_16185              | [full] | 1762  | No  | NA   | 0    | 2  | Not-determined | Genome-fragment | NA    | 0     |
| S10_v2_16225              | [full] | 2529  | No  | NA   | 0    | 2  | Not-determined | Genome-fragment | NA    | 0     |
| S10_v2_16263              | [full] | 2112  | No  | NA   | 0    | 0  | Not-determined | Genome-fragment | NA    | 0     |
| S3_extracted_k141_112657  |        | 3357  | No  | NA   | 1    | 1  | Low-quality    | Genome-fragment | 9.19  | 0     |
| S10_v2_16380              | [full] | 1286  | No  | NA   | 0    | 0  | Not-determined | Genome-fragment | NA    | 0     |
| S10_v2_16518              | [full] | 2318  | No  | NA   | 1    | 1  | Not-determined | Genome-fragment | NA    | 0     |
| S10_v2_16572              | [full] | 1642  | No  | NA   | 0    | 0  | Not-determined | Genome-fragment | NA    | 0     |
| S10_v2_16632              | [full] | 1873  | No  | NA   | 0    | 0  | Not-determined | Genome-fragment | NA    | 0     |
| S10_v2_16659              | [full] | 2619  | No  | NA   | 2    | 2  | Not-determined | Genome-fragment | NA    | 0     |
| S5_v2_k141_102935         | [full] | 3357  | No  | NA   | 1    | 0  | Low-quality    | Genome-fragment | 4.93  | 0     |
| S10_v2_17019              | [full] | 6403  | No  | NA   | 0    | 5  | Not-determined | Genome-fragment | NA    | 0     |
| S2_v2_k141_125954         | [full] | 3358  | No  | NA   | 2    | 0  | Low-quality    | Genome-fragment | 7.48  | 0     |
| S10_v2_17363              | [full] | 5051  | No  | NA   | 0    | 4  | Not-determined | Genome-fragment | NA    | 0     |
| S10_v2_17395              | [full] | 4953  | No  | NA   | 0    | 4  | Not-determined | Genome-fragment | NA    | 0     |
| S10_v2_17402              | [full] | 8288  | No  | NA   | 0    | 3  | Not-determined | Genome-fragment | NA    | 0     |
| S5_v2_k141_1335           | [full] | 3358  | No  | NA   | 0    | 0  | Low-quality    | Genome-fragment | 2.03  | 0     |
| S10_v2_17525              | [full] | 3162  | No  | NA   | 0    | 1  | Not-determined | Genome-fragment | NA    | 0     |
| S12_v2_k141_79632         | [full] | 3358  | No  | NA   | 5    | 0  | Low-quality    | Genome-fragment | 9.2   | 0     |
| S8_extracted_k141_151823  |        | 3358  | No  | NA   | 0    | 0  | Low-quality    | Genome-fragment | 3.5   | 0     |
| S10_v2_17750              | [full] | 1302  | No  | NA   | 0    | 1  | Not-determined | Genome-fragment | NA    | 0     |
| S3_extracted_k141_76372   |        | 3359  | No  | NA   | 0    | 1  | Low-quality    | Genome-fragment | 6.18  | 0     |
| S10_v2_18131              | [full] | 1462  | No  | NA   | 1    | 1  | Not-determined | Genome-fragment | NA    | 0     |
| S10_v2_18157              | [full] | 1071  | No  | NA   | 0    | 0  | Not-determined | Genome-fragment | NA    | 0     |
| S14_v2_k141_83178         | [full] | 3360  | No  | NA   | 0    | 0  | Low-quality    | Genome-fragment | 8.36  | 0     |
| S10_v2_18488              | [full] | 1004  | No  | NA   | 0    | 0  | Not-determined | Genome-fragment | NA    | 0     |
| S10_v2_18537              | [full] | 1572  | No  | NA   | 0    | 0  | Not-determined | Genome-fragment | NA    | 0     |
| S9_v2_k141_18017          | [full] | 3361  | No  | NA   | 0    | 0  | Low-quality    | Genome-fragment | 5.7   | 0     |
| S10_v2_18623              | [full] | 1665  | No  | NA   | 0    | 0  | Not-determined | Genome-fragment | NA    | 0     |
| S10_v2_18864              | [full] | 4822  | No  | NA   | 1    | 1  | Not-determined | Genome-fragment | NA    | 0     |
| S10_v2_18901              | [full] | 42132 | No  | NA   | 11   | 0  | High-quality   | Genome-fragment | 100   | 0     |
| S10_v2_18931              | [full] | 1477  | No  | NA   | 0    | 1  | Not-determined | Genome-fragment | NA    | 0     |
| S10_v2_18988              | [full] | 7098  | No  | NA   | 5    | 1  | Not-determined | Genome-fragment | NA    | 0     |
| S13_v2_11739              | [full] | 3362  | No  | NA   | 3    | 0  | Low-quality    | Genome-fragment | 5.63  | 0     |
| S10_v2_19079              | [full] | 2133  | No  | NA   | 0    | 0  | Not-determined | Genome-fragment | NA    | 0     |
| S14_v2_k141_98473         | [full] | 3362  | No  | NA   | 1    | 0  | Low-quality    | Genome-fragment | 5.94  | 0     |
| S10_v2_19335              | [full] | 1636  | No  | NA   | 1    | 2  | Not-determined | Genome-fragment | NA    | 0     |
| S10_v2_19435              | [full] | 1470  | No  | NA   | 0    | 2  | Not-determined | Genome-fragment | NA    | 0     |
| S10_v2_19444              | [full] | 1509  | No  | NA   | 0    | 2  | Not-determined | Genome-fragment | NA    | 0     |
| S9_extracted_k141_56986   |        | 3363  | No  | NA   | 0    | 0  | Low-quality    | Genome-fragment | 7.53  | 0     |
| S10_v2_19466              | [full] | 9270  | No  | NA   | 0    | 3  | Not-determined | Genome-fragment | NA    | 0     |
| S10_v2_19597              | [full] | 1540  | No  | NA   | 0    | 0  | Not-determined | Genome-fragment | NA    | 0     |
| S10_v2_19691              | [full] | 1236  | No  | NA   | 1    | 2  | Not-determined | Genome-fragment | NA    | 0     |
| S10_v2_19734              | [full] | 1407  | No  | NA   | 0    | 0  | Not-determined | Genome-fragment | NA    | 0     |
| S10_v2_19810              | [full] | 1227  | No  | NA   | 0    | 0  | Not-determined | Genome-fragment | NA    | 0     |
| S1_extracted_k141_129286  |        | 3364  | No  | NA   | 1    | 0  | Low-quality    | Genome-fragment | 3.42  | 0     |
| S10_v2_19976              | [full] | 1254  | No  | NA   | 2    | 2  | Not-determined | Genome-fragment | NA    | 0     |
| S10_v2_20000              | [full] | 6219  | No  | NA   | 0    | 1  | Not-determined | Genome-fragment | NA    | 0     |
| S10_v2_20057              | [full] | 6568  | No  | NA   | 0    | 4  | Not-determined | Genome-fragment | NA    | 0     |
| S5_v2_k141_51866          | [full] | 3364  | No  | NA   | 0    | 0  | Low-quality    | Genome-fragment | 2.91  | 0     |
| S10_v2_20140              | [full] | 2088  | No  | NA   | 0    | 0  | Not-determined | Genome-fragment | NA    | 0     |
| S7_extracted_6670         |        | 3364  | No  | NA   | 0    | 0  | Low-quality    | Genome-fragment | 6.65  | 0     |
| S16_v2_15497              | [full] | 3364  | Yes | NA   | 1    | 1  | Low-quality    | Genome-fragment | 1.39  | 51.1  |
| S10_v2_20338              | [full] | 6564  | No  | NA   | 0    | 1  | Not-determined | Genome-fragment | NA    | 0     |
| S8_extracted_k141_48959   |        | 3364  | Yes | NA   | 1545 | 2  | Low-quality    | Genome-fragment | 3.13  | 54.07 |
| S10_v2_20400              | [full] | 20725 | No  | NA   | 11   | 0  | Medium-quality | Genome-fragment | 51.99 | 0     |
| S3_extracted_k141_5508    |        | 3365  | No  | NA   | 1    | 1  | Low-quality    | Genome-fragment | NA    | 0     |
| S7_extracted_112431       |        | 3366  | No  | NA   | 0    | 1  | Low-quality    | Genome-fragment | 2.5   | 0     |
| S7_extracted_k141_59946   |        | 3367  | No  | NA   | 1    | 0  | Low-quality    | Genome-fragment | 7.16  | 0     |
| S14_extracted_k141_84151  |        | 3367  | No  | NA   | 0    | 0  | Low-quality    | Genome-fragment | 7.15  | 0     |
| S10_v2_20668              | [full] | 1246  | No  | NA   | 0    | 2  | Not-determined | Genome-fragment | NA    | 0     |
| S10_v2_20768              | [full] | 3109  | No  | NA   | 0    | 1  | Not-determined | Genome-fragment | NA    | 0     |
| S10_v2_20802              | [full] | 2859  | No  | NA   | 0    | 2  | Not-determined | Genome-fragment | NA    | 0     |
| S10_v2_20930              | [full] | 2825  | No  | NA   | 0    | 1  | Not-determined | Genome-fragment | NA    | 0     |
| S10_v2_20993              | [full] | 1769  | No  | NA   | 0    | 1  | Not-determined | Genome-fragment | NA    | 0     |
| S11_extracted_k141_53861  |        | 3368  | No  | NA   | 0    | 2  | Low-quality    | Genome-fragment | 2.4   | 0     |
| S16_v2_63809              | [full] | 3368  | No  | NA   | 0    | 2  | Low-quality    | Genome-fragment | 1.1   | 0     |
| S6_v2_k141_24009          | [full] | 3368  | No  | NA   | 1    | 0  | Low-quality    | Genome-fragment | 7.5   | 0     |
| S4_extracted_12574        |        | 3369  | No  | NA   | 1    | 0  | Low-quality    | Genome-fragment | 2.08  | 0     |
| S10_v2_21370              | [full] | 1471  | No  | NA   | 1    | 1  | Not-determined | Genome-fragment | NA    | 0     |
| S17_v2_k141_64489         | [full] | 3370  | No  | NA   | 3    | 0  | Low-quality    | Genome-fragment | 7.7   | 0     |
| S10_v2_21613              | [full] | 2754  | No  | NA   | 0    | 1  | Not-determined | Genome-fragment | NA    | 0     |
| S10_v2_21718              | [full] | 1004  | No  | NA   | 1    | 1  | Not-determined | Genome-fragment | NA    | 0     |
| S10_v2_21946              | [full] | 3518  | No  | NA   | 0    | 0  | Not-determined | Genome-fragment | NA    | 0     |
| S5_v2_k141_15189          | [full] | 3370  | No  | NA   | 5    | 0  | Low-quality    | Genome-fragment | 7.9   | 0     |
| S10_v2_22502              | [full] | 3513  | No  | NA   | 8    | 8  | Not-determined | Genome-fragment | NA    | 0     |
| S10_v2_22607              | [full] | 3882  | No  | NA   | 0    | 2  | Not-determined | Genome-fragment | NA    | 0     |
| S10_v2_22676              | [full] | 3660  | No  | NA   | 0    | 2  | Not-determined | Genome-fragment | NA    | 0     |
| S10_v2_22681              | [full] | 1680  | No  | NA   | 0    | 0  | Not-determined | Genome-fragment | NA    | 0     |
| S10_v2_22728              | [full] | 6584  | No  | NA   | 2    | 2  | Not-determined | Genome-fragment | NA    | 0     |
| S4_extracted_29231        |        | 3370  | No  | NA   | 1    | 0  | Low-quality    | Genome-fragment | 4.14  | 0     |
| S10_v2_23059              | [full] | 1990  | No  | NA   | 0    | 0  | Not-determined | Genome-fragment | NA    | 0     |
| S9_v2_k141_34504          | [full] | 2371  | No  | NA   | 0    | 0  | Low-quality    | Genome-fragment | 5.37  | 0     |
| S10_v2_23120              | [full] | 2181  | No  | NA   | 0    | 0  | Not-determined | Genome-fragment | NA    | 0     |
| S10_v2_23207              | [full] | 6672  | No  | NA   | 0    | 3  | Not-determined | Genome-fragment | NA    | 0     |
| S10_v2_23344              | [full] | 1955  | No  | NA   | 0    | 0  | Not-determined | Genome-fragment | NA    | 0     |
| S10_v2_23360              | [full] | 2174  | No  | NA   | 0    | 0  | Not-determined | Genome-fragment | NA    | 0     |
| S10_v2_23378              | [full] | 3015  | No  | NA   | 0    | 1  | Not-determined | Genome-fragment | NA    | 0     |
| S17_extracted_k141_143656 |        | 3372  | No  | NA   | 4    | 0  | Low-quality    | Genome-fragment | 5.72  | 0     |
| S10_v2_23423              | [full] | 4881  | No  | NA   | 0    | 3  | Not-determined | Genome-fragment | NA    | 0     |
| S11_extracted_k141_103203 |        | 3372  | No  | NA   | 1    | 0  | Low-quality    | Genome-fragment | 1.88  | 0     |
| S9_extracted_k141_14333   |        | 3373  | No  | NA   | 0    | 3  | Low-quality    | Genome-fragment | 1.26  | 0     |
| S10_v2_23697              | [full] | 3206  | No  | NA   | 0    | 0  | Not-determined | Genome-fragment | NA    | 0     |
| S10_v2_23771              | [full] | 1356  | No  | NA   | 0    | 0  | Not-determined | Genome-fragment | NA    | 0     |
| S10_v2_23853              | [full] | 1802  | No  | NA   | 0    | 2  | Not-determined | Genome-fragment | NA    | 0     |
| S10_v2_13706              | [full] | 3373  | No  | NA   | 3    | 0  | Low-quality    | Genome-fragment | 9.65  | 0     |
| S10_v2_23900              | [full] | 4856  | No  | NA   | 0    | 2  | Not-determined | Genome-fragment | NA    | 0     |
| S10_v2_24159              | [full] | 1953  | No  | NA</ |      |    |                |                 |       |       |



|                           |        |     |    |    |                |                  |                 |       |       |   |
|---------------------------|--------|-----|----|----|----------------|------------------|-----------------|-------|-------|---|
| S10_v3_27586  full        | 4105   | No  | NA | 0  | 4              | Not-determined   | Genome-fragment | NA    |       | 0 |
| S7_extracted_57885        | 3379   | No  | NA | 0  | 0              | Low-quality      | Genome-fragment | 7.53  |       | 0 |
| S16_extracted_79511       | 3379   | No  | NA | 1  | 0              | Low-quality      | Genome-fragment | 6.26  |       | 0 |
| S10_v3_27802  full        | 18834  | No  | NA | 0  | 4              | Not-determined   | Genome-fragment | NA    |       | 0 |
| S12_extracted_k141_177760 | 3379   | No  | NA | 0  | 1              | Low-quality      | Genome-fragment | 1.69  |       | 0 |
| S10_v3_27855  full        | 2878   | No  | NA | 0  | 2              | Not-determined   | Genome-fragment | NA    |       | 0 |
| S15_v3_22807  full        | 3379   | No  | NA | 1  | 0              | Low-quality      | Genome-fragment | 1.82  |       | 0 |
| S8_extracted_k141_194507  | 3379   | No  | NA | 0  | 1              | Low-quality      | Genome-fragment | 4.07  |       | 0 |
| S8_v3_k141_166191  full   | 3380   | No  | NA | 0  | 2              | Low-quality      | Genome-fragment | 1.83  |       | 0 |
| S10_v3_28484  full        | 2178   | No  | NA | 0  | 0              | Not-determined   | Genome-fragment | NA    |       | 0 |
| S10_v3_28646  full        | 8521   | No  | NA | 0  | 3              | Not-determined   | Genome-fragment | NA    |       | 0 |
| S10_v3_28658  full        | 3043   | No  | NA | 0  | 1              | Not-determined   | Genome-fragment | NA    |       | 0 |
| S17_extracted_k141_89103  | 3381   | No  | NA | 1  | 0              | Low-quality      | Genome-fragment | 4.2   |       | 0 |
| S10_v3_28824  full        | 1474   | No  | NA | 0  | 2              | Not-determined   | Genome-fragment | NA    |       | 0 |
| S10_v3_28916  full        | 8385   | No  | NA | 0  | 0              | Not-determined   | Genome-fragment | NA    |       | 0 |
| S10_v3_29103  full        | 2789   | No  | NA | 0  | 2              | Not-determined   | Genome-fragment | NA    |       | 0 |
| S10_v3_29200  full        | 2183   | No  | NA | 0  | 0              | 1 Not-determined | Genome-fragment | NA    |       | 0 |
| S10_v3_29280  full        | 2604   | No  | NA | 0  | 1              | Not-determined   | Genome-fragment | NA    |       | 0 |
| S10_v3_29450  full        | 6128   | No  | NA | 0  | 4              | Not-determined   | Genome-fragment | NA    |       | 0 |
| S12_extracted_k141_49369  | 3381   | No  | NA | 0  | 1              | Low-quality      | Genome-fragment | 2.33  |       | 0 |
| S10_v3_29651  full        | 1610   | No  | NA | 0  | 1              | Not-determined   | Genome-fragment | NA    |       | 0 |
| S10_v3_29704  full        | 2837   | No  | NA | 0  | 0              | Not-determined   | Genome-fragment | NA    |       | 0 |
| S3_extracted_k141_103466  | 3383   | No  | NA | 1  | 0              | Low-quality      | Genome-fragment | 8.98  |       | 0 |
| S7_extracted_71925        | 3383   | No  | NA | 0  | 0              | Low-quality      | Genome-fragment | 11.05 |       | 0 |
| S7_extracted_121861       | 3383   | No  | NA | 0  | 0              | Low-quality      | Genome-fragment | 3.52  |       | 0 |
| S7_v3_33819  full         | 3383   | No  | NA | 0  | 0              | Low-quality      | Genome-fragment | 6.47  |       | 0 |
| S2_v3_k141_18943  full    | 3383   | No  | NA | 0  | 3              | Low-quality      | Genome-fragment | 2.02  |       | 0 |
| S10_v3_30031  full        | 2108   | No  | NA | 0  | 0              | Not-determined   | Genome-fragment | NA    |       | 0 |
| S10_v3_30148  full        | 3553   | No  | NA | 0  | 2              | Not-determined   | Genome-fragment | NA    |       | 0 |
| S5_extracted_k141_72962   | 3384   | No  | NA | 2  | 0              | Low-quality      | Genome-fragment | 1.61  |       | 0 |
| S10_v3_30355  full        | 2188   | No  | NA | 0  | 0              | Not-determined   | Genome-fragment | NA    |       | 0 |
| S17_v3_k141_26212  full   | 3385   | No  | NA | 0  | 1              | Low-quality      | Genome-fragment | 3.44  |       | 0 |
| S10_v3_30468  full        | 2469   | No  | NA | 0  | 1              | Not-determined   | Genome-fragment | NA    |       | 0 |
| S3_v3_k141_69256  full    | 3386   | Yes |    | 2  | 1              | Low-quality      | Genome-fragment | 5.26  | 11.61 |   |
| S16_extracted_48282       | 3386   | No  | NA | 1  | 0              | Low-quality      | Genome-fragment | 5.58  |       | 0 |
| S10_v3_30801  full        | 2414   | No  | NA | 1  | Not-determined | Genome-fragment  | NA              | 8.4   |       | 0 |
| S10_v3_30931  full        | 10466  | No  | NA | 0  | 6              | Not-determined   | Genome-fragment | NA    |       | 0 |
| S16_v3_34971  full        | 3386   | No  | NA | 2  | 0              | Low-quality      | Genome-fragment | 7.46  |       | 0 |
| S10_v3_31238  full        | 2555   | No  | NA | 0  | 2              | Not-determined   | Genome-fragment | NA    |       | 0 |
| S16_v3_78031  full        | 3386   | No  | NA | 0  | 0              | Low-quality      | Genome-fragment | 7.54  |       | 0 |
| S10_v3_31731  full        | 1787   | No  | NA | 0  | 0              | Not-determined   | Genome-fragment | NA    |       | 0 |
| S11_v3_k141_9262  full    | 3388   | No  | NA | 0  | 0              | Low-quality      | Genome-fragment | 7.6   |       | 0 |
| S10_v3_31855  full        | 1965   | No  | NA | 0  | 1              | Not-determined   | Genome-fragment | NA    |       | 0 |
| S11_extracted_k141_67814  | 3388   | No  | NA | 3  | 0              | Low-quality      | Genome-fragment | 8.91  |       | 0 |
| S10_v3_31895  full        | 1091   | No  | NA | 0  | 1              | Not-determined   | Genome-fragment | NA    |       | 0 |
| S10_v3_31974  full        | 2636   | No  | NA | 0  | 1              | Not-determined   | Genome-fragment | NA    |       | 0 |
| S10_v3_32008  full        | 4249   | No  | NA | 0  | 2              | Not-determined   | Genome-fragment | NA    |       | 0 |
| S10_v3_32076  full        | 2697   | No  | NA | 0  | 1              | Not-determined   | Genome-fragment | NA    |       | 0 |
| S12_extracted_k141_164102 | 3388   | No  | NA | 0  | 0              | Low-quality      | Genome-fragment | 8.57  |       | 0 |
| S8_v3_k141_179521  full   | 3389   | No  | NA | 0  | 0              | Low-quality      | Genome-fragment | 2.09  |       | 0 |
| S10_v3_32643  full        | 2077   | No  | NA | 0  | 3              | Not-determined   | Genome-fragment | NA    |       | 0 |
| S5_extracted_k141_101608  | 2950   | No  | NA | 0  | 0              | Low-quality      | Genome-fragment | 2.01  |       | 0 |
| S3_v3_k141_1471  full     | 3391   | No  | NA | 0  | 0              | Low-quality      | Genome-fragment | 5.02  |       | 0 |
| S12_extracted_k141_81567  | 3391   | No  | NA | 0  | 0              | Low-quality      | Genome-fragment | 5.08  |       | 0 |
| S1_v3_k141_6427  full     | 3392   | No  | NA | 0  | 1              | Low-quality      | Genome-fragment | 5.76  |       | 0 |
| S10_v3_33009  full        | 1379   | No  | NA | 0  | 0              | Not-determined   | Genome-fragment | NA    |       | 0 |
| S10_v3_33122  full        | 1140   | No  | NA | 0  | 2              | Not-determined   | Genome-fragment | NA    |       | 0 |
| S10_v3_33276  full        | 2988   | No  | NA | 0  | 2              | Not-determined   | Genome-fragment | NA    |       | 0 |
| S5_v3_k141_41543  full    | 3392   | No  | NA | 0  | 3              | Low-quality      | Genome-fragment | 2.25  |       | 0 |
| S10_v3_96121  full        | 3393   | No  | NA | 0  | 0              | Low-quality      | Genome-fragment | 6.23  |       | 0 |
| S10_v3_33366  full        | 1122   | No  | NA | 0  | 1              | Not-determined   | Genome-fragment | NA    |       | 0 |
| S10_v3_33473  full        | 1396   | No  | NA | 0  | 2              | Not-determined   | Genome-fragment | NA    |       | 0 |
| S10_v3_33592  full        | 2476   | No  | NA | 0  | 2              | Not-determined   | Genome-fragment | NA    |       | 0 |
| S10_v3_33670  full        | 2987   | No  | NA | 0  | 3              | Not-determined   | Genome-fragment | NA    |       | 0 |
| S9_extracted_k141_87242   | 3394   | No  | NA | 0  | 1              | Low-quality      | Genome-fragment | 7.56  |       | 0 |
| S10_extracted_44700       | 3394   | No  | NA | 4  | 0              | Low-quality      | Genome-fragment | 8.96  |       | 0 |
| S10_v3_33950  full        | 2873   | No  | NA | 0  | 1              | Not-determined   | Genome-fragment | NA    |       | 0 |
| S6_v3_k141_18573  full    | 3394   | No  | NA | 0  | 0              | Low-quality      | Genome-fragment | 10.31 |       | 0 |
| S10_v3_34117  full        | 1067   | No  | NA | 0  | 2              | Not-determined   | Genome-fragment | NA    |       | 0 |
| S16_extracted_15847       | 3395   | No  | NA | 0  | 2              | Low-quality      | Genome-fragment | 0.32  |       | 0 |
| S8_extracted_k141_154199  | 3395   | No  | NA | 1  | 0              | Low-quality      | Genome-fragment | 3.46  |       | 0 |
| S10_extracted_113914      | 3396   | No  | NA | 0  | 0              | Low-quality      | Genome-fragment | 5.28  |       | 0 |
| S10_extracted_57308       | 3398   | No  | NA | 1  | 0              | Low-quality      | Genome-fragment | 5.31  |       | 0 |
| S12_v3_k141_162114  full  | 3398   | No  | NA | 0  | 3              | Low-quality      | Genome-fragment | 6.39  |       | 0 |
| S10_v3_34624  full        | 1327   | No  | NA | 0  | 2              | Not-determined   | Genome-fragment | NA    |       | 0 |
| S10_v3_34627  full        | 1609   | No  | NA | 0  | 0              | Not-determined   | Genome-fragment | NA    |       | 0 |
| S8_extracted_k141_58380   | 3398   | No  | NA | 0  | 0              | Low-quality      | Genome-fragment | 3.33  |       | 0 |
| S11_extracted_k141_76680  | 3400   | No  | NA | 0  | 0              | Low-quality      | Genome-fragment | 7.18  |       | 0 |
| S10_v3_34831  full        | 2094   | No  | NA | 0  | 0              | Not-determined   | Genome-fragment | NA    |       | 0 |
| S10_v3_34923  full        | 1207   | No  | NA | 0  | 0              | Not-determined   | Genome-fragment | NA    |       | 0 |
| S7_extracted_129669       | 3400   | No  | NA | 0  | 2              | Low-quality      | Genome-fragment | 9.59  |       | 0 |
| S8_v3_k141_170008  full   | 3400   | No  | NA | 0  | 0              | Low-quality      | Genome-fragment | 8.4   |       | 0 |
| S7_v3_42691  full         | 3401   | No  | NA | 1  | 0              | Low-quality      | Genome-fragment | 6.82  |       | 0 |
| S12_extracted_k141_33416  | 3401   | No  | NA | 4  | 0              | Low-quality      | Genome-fragment | 9.06  |       | 0 |
| S15_extracted_33484       | 3401   | No  | NA | 0  | 0              | Low-quality      | Genome-fragment | 2.39  |       | 0 |
| S10_v3_35308  full        | 5948   | No  | NA | 0  | 5              | Not-determined   | Genome-fragment | NA    |       | 0 |
| S17_extracted_k141_76842  | 3402   | No  | NA | 0  | 0              | Low-quality      | Genome-fragment | 4.6   |       | 0 |
| S10_v3_35401  full        | 1046   | No  | NA | 0  | 0              | Not-determined   | Genome-fragment | NA    |       | 0 |
| S14_extracted_k141_112902 | 3402   | No  | NA | 0  | 0              | Low-quality      | Genome-fragment | 4.22  |       | 0 |
| S10_v3_35479  full        | 8897   | No  | NA | 0  | 7              | Not-determined   | Genome-fragment | NA    |       | 0 |
| S10_v3_35553  full        | 1364   | No  | NA | 0  | 2              | Not-determined   | Genome-fragment | NA    |       | 0 |
| S16_v3_145758  full       | 3402   | No  | NA | 0  | 3              | Low-quality      | Genome-fragment | 2.14  |       | 0 |
| S10_v3_35828  full        | 5867   | No  | NA | 0  | 2              | Not-determined   | Genome-fragment | NA    |       | 0 |
| S14_extracted_k141_66405  | 3403   | No  | NA | 10 | 0              | Low-quality      | Genome-fragment | 11.25 |       | 0 |
| S10_v3_35854  full        | 51045  | No  | NA | 0  | 0              | Medium-quality   | Genome-fragment | 75.43 |       | 0 |
| S14_v3_k141_743  full     | 3404   | No  | NA | 1  | 0              | Low-quality      | Genome-fragment | 2.1   |       | 0 |
| S10_v3_35893  full        | 1715   | No  | NA | 0  | 2              | Not-determined   | Genome-fragment | NA    |       | 0 |
| S16_extracted_113833      | 3404   | No  | NA | 0  | 3              | Low-quality      | Genome-fragment | 0.96  |       | 0 |
| S14_extracted_k141_32270  | 3405   | Yes |    | 0  | 2              | Low-quality      | Genome-fragment | 6.72  | 21.9  |   |
| S5_extracted_k141_51017   | 3405   | No  | NA | 0  | 1              | Low-quality      | Genome-fragment | 6.81  |       | 0 |
| S8_extracted_k141_72759   | 3405   | No  | NA | 3  | 0              | Low-quality      | Genome-fragment | 8.51  |       | 0 |
| S13_extracted_117058      | 3406   | No  | NA | 0  | 0              | Low-quality      | Genome-fragment | 8.91  |       | 0 |
| S10_v3_36296  full        | 1845   | No  | NA | 0  | 1              | Not-determined   | Genome-fragment | NA    |       | 0 |
| S8_extracted_k141_66569   | 3406   | No  | NA | 1  | 0              | Low-quality      | Genome-fragment | 12.15 |       | 0 |
| S10_v3_36407  full        | 24518  | No  | NA | 2  | 1              | Medium-quality   | Genome-fragment | 58.94 |       | 0 |
| S10_v3_36457  full        | 3389   | No  | NA | 0  | 0              | Not-determined   | Genome-fragment | NA    |       | 0 |
| S10_v3_36473  full        | 6773   | No  | NA | 0  | 4              | Not-determined   | Genome-fragment | NA    |       | 0 |
| S10_v3_36489  full        | 1518   | No  | NA | 0  | 1              | Not-determined   | Genome-fragment | NA    |       | 0 |
| S10_v3_36501  full        | 2072   | No  | NA | 0  | 2              | Not-determined   | Genome-fragment | NA    |       | 0 |
| S10_v3_36598  full        | 29836  | No  | NA | 11 | 2              | Medium-quality   | Genome-fragment | 50.18 |       | 0 |
| S3_v3_k141_123051  full   | 3408   | No  | NA | 0  | 0              | Low-quality      | Genome-fragment | 9     |       | 0 |
| S16_extracted_110986      | 3408   | No  | NA | 0  | 0              | Low-quality      | Genome-fragment | 3.17  |       | 0 |
| S6_extracted_k141_42013   | 3408   | No  | NA | 0  | 1              | Low-quality      | Genome-fragment | 1.46  |       | 0 |
| S8_v3_k141_126577  full   | 3409   | No  | NA | 0  | 1              | Low-quality      | Genome-fragment | 7.58  |       | 0 |
| S10_v3_36861  full        | 1034   | No  | NA | 0  | 1              | Not-determined   | Genome-fragment | NA    |       | 0 |
| S14_extracted_k141_405    | 3410   | No  | NA | 4  | 0              | Low-quality      | Genome-fragment | 11.26 |       | 0 |
| S10_extracted_9293        | 3410   | No  | NA | 0  | 0              | Low-quality      | Genome-fragment | 11.8  |       | 0 |
| S10_v3_37155  full        | 3250   | No  | NA | 0  | 4              | Not-determined   | Genome-fragment | NA    |       | 0 |
| S8_extracted_k141_204570  | 3410   | No  | NA | 0  | 0              | Low-quality      | Genome-fragment | 5.81  |       | 0 |
| S7_extracted_36776        | 3411   | No  | NA | 4  | 0              | Low-quality      | Genome-fragment | 8.35  |       | 0 |
| S10_v3_37379  full        | 109791 | No  | NA | 17 | 1              | Medium-quality   | Genome-fragment | 71.38 |       | 0 |
| S10_v3_37381  full        | 7284   | No  | NA | 0  | 2              | Not-determined   | Genome-fragment | NA    |       | 0 |
| S4_extracted_2783         | 3411   | No  | NA | 0  | 0              | Low-quality      | Genome-fragment | 3.6   |       | 0 |
| S10_v3_37410  full        | 1240   | No  | NA | 0  | 1              | Not-determined   | Genome-fragment | NA    |       | 0 |
| S10_v3_37537  full        | 1061   | No  | NA | 0  | 1              | Not-determined   | Genome-fragment | NA    |       | 0 |
| S10_v3_37694  full        | 27829  | No  | NA | 4  | 0              | Medium-quality   | Genome-fragment | 63.54 |       | 0 |
| S9_extracted_k141_55200   | 3412   | No  | NA | 0  | 0              | Low-quality      | Genome-fragment | 1.94  |       | 0 |
| S10_v3_37765  full        | 1045   | No  | NA | 0  | 0              | Not-determined   | Genome-fragment | NA    |       | 0 |
| S10_v3_37796  full        | 2378   | No  | NA | 0  | 3              | Not-determined   | Genome-fragment | NA    |       | 0 |
| S10_v3_37845  full        | 1624   | No  | NA | 0  | 2              | Not-determined   | Genome-fragment | NA    |       | 0 |
| S9_v3_k141_7192  full     | 3412   | No  | NA | 0  | 0              | Low-quality      | Genome-fragment | 7.83  |       | 0 |
| S10_v3_38110  full        | 1066   | No  | NA | 0  | 1              | Not-determined   | Genome-fragment | NA    |       | 0 |
| S14_v3_k141_60867  full   | 3412   | No  | NA | 0  | 0              | Low-quality      | Genome-fragment | 8.5   |       | 0 |
| S12_v3_k141_33193  full   | 3412   | No  | NA | 0  | 2              | Low-quality      | Genome-fragment | 1.15  |       | 0 |
| S4_extracted_6763         | 3412   | No  | NA | 9  | 0              | Low-quality      | Genome-fragment | 11.24 |       | 0 |
| S10_v3_38427  full        | 3487   | No  | NA | 0  | 3              | Not-determined   | Genome-fragment | NA    |       | 0 |
| S14_extracted_k141_60978  | 3413   | No  | NA | 0  | 2              | Low-quality      | Genome-fragment | 1.64  |       | 0 |
| S8_v3_k141_123028  full   | 3413   | No  | NA | 0  | 0              | Low-quality      | Genome-fragment | 7.97  |       | 0 |
| S16_extracted_104463      | 3414   | No  | NA | 0  | 3              | Low-quality      | Genome-fragment | 1.72  |       | 0 |
| S10_v3_38554  full        |        |     |    |    |                |                  |                 |       |       |   |



|                             |       |     |      |    |                |                 |                 |     |       |       |
|-----------------------------|-------|-----|------|----|----------------|-----------------|-----------------|-----|-------|-------|
| S10_vs_41243  full          | 3089  | No  | NA   | 0  | 1              | Not-determined  | Genome-fragment | NA  | 8.05  | 0     |
| S14_vs_k141_9613  full      | 3419  | No  | NA   | 0  | 0              | Low-quality     | Genome-fragment | NA  | 2.23  | 0     |
| S7_extracted_3893           | 3181  | No  | NA   | 0  | 3              | Not-determined  | Genome-fragment | NA  | 6.45  | 0     |
| S10_vs_41706  full          | 3420  | No  | NA   | 0  | 1              | Low-quality     | Genome-fragment | NA  | 6.89  | 0     |
| S16_vs_101575  full         | 9093  | No  | NA   | 0  | 6              | Not-determined  | Genome-fragment | NA  | 5.43  | 0     |
| S10_vs_42089  full          | 3420  | No  | NA   | 0  | 2              | Not-determined  | Genome-fragment | NA  | 5.43  | 0     |
| S2_extracted_k141_6795      | 3421  | No  | NA   | 0  | 0              | Low-quality     | Genome-fragment | NA  | 5.43  | 0     |
| S10_vs_42300  full          | 1742  | No  | NA   | 0  | 2              | Not-determined  | Genome-fragment | NA  | 5.21  | 0     |
| S10_extracted_65247         | 2157  | No  | NA   | 0  | 2              | Not-determined  | Genome-fragment | NA  | 2.4   | 0     |
| S10_vs_42417  full          | 20436 | No  | NA   | 0  | 1              | Not-determined  | Genome-fragment | NA  | 7.25  | 0     |
| S10_vs_42463  full          | 2478  | No  | NA   | 0  | 1              | Low-quality     | Genome-fragment | NA  | 9.17  | 0     |
| S10_vs_42477  full          | 3421  | No  | NA   | 0  | 1              | Low-quality     | Genome-fragment | NA  | 5.21  | 0     |
| S6_extracted_k141_34128     | 3422  | No  | NA   | 0  | 2              | Low-quality     | Genome-fragment | NA  | 2.4   | 0     |
| S8_extracted_k141_131936    | 3424  | No  | NA   | 4  | 0              | Low-quality     | Genome-fragment | NA  | 2.34  | 0     |
| S10_vs_43009  full          | 1583  | No  | NA   | 3  | 1              | Not-determined  | Genome-fragment | NA  | 9.98  | 0     |
| S10_vs_43025  full          | 3910  | No  | NA   | 0  | 0              | Not-determined  | Genome-fragment | NA  | 6.04  | 0     |
| S10_vs_43089  full          | 1947  | No  | NA   | 0  | 2              | Not-determined  | Genome-fragment | NA  | 9.98  | 0     |
| S8_vs_k141_16406  full      | 3424  | No  | NA   | 0  | 0              | Low-quality     | Genome-fragment | NA  | 6.04  | 0     |
| S8_vs_k141_50708  full      | 3425  | No  | NA   | 1  | 0              | Low-quality     | Genome-fragment | NA  | 6.04  | 0     |
| S10_vs_43402  full          | 1882  | No  | NA   | 0  | 1              | Not-determined  | Genome-fragment | NA  | 5.87  | 0     |
| S10_vs_43435  full          | 1048  | No  | NA   | 0  | 0              | Not-determined  | Genome-fragment | NA  | 5.87  | 0     |
| S17_vs_k141_88736  full     | 3426  | No  | NA   | 0  | 1              | Low-quality     | Genome-fragment | NA  | 4.38  | 0     |
| S10_vs_43771  full          | 1591  | No  | NA   | 0  | 0              | Not-determined  | Genome-fragment | NA  | 1.88  | 0     |
| S10_vs_45536  full          | 3426  | No  | NA   | 0  | 3              | Low-quality     | Genome-fragment | NA  | 1.12  | 0     |
| S14_extracted_k141_112330   | 3427  | No  | NA   | 0  | 0              | Low-quality     | Genome-fragment | NA  | 5.87  | 0     |
| S12_extracted_k141_115632   | 3427  | No  | NA   | 0  | 1              | Low-quality     | Genome-fragment | NA  | 8.07  | 0     |
| S10_vs_44076  full          | 2734  | No  | NA   | 0  | 1              | Not-determined  | Genome-fragment | NA  | 7.38  | 0     |
| S10_vs_44228  full          | 5728  | No  | NA   | 0  | 1              | Not-determined  | Genome-fragment | NA  | 8.01  | 0     |
| S10_vs_44319  full          | 9535  | No  | NA   | 0  | 4              | Not-determined  | Genome-fragment | NA  | 8.07  | 0     |
| S10_vs_44412  full          | 1777  | No  | NA   | 0  | 1              | Not-determined  | Genome-fragment | NA  | 7.38  | 0     |
| S17_extracted_k141_110462   | 3428  | No  | NA   | 0  | 1              | Low-quality     | Genome-fragment | NA  | 8.01  | 0     |
| S17_vs_k141_34642  full     | 3429  | No  | NA   | 0  | 0              | Low-quality     | Genome-fragment | NA  | 8.07  | 0     |
| S10_vs_44551  full          | 1742  | No  | NA   | 0  | 0              | Not-determined  | Genome-fragment | NA  | 0.5   | 0     |
| S14_extracted_k141_8718     | 3429  | No  | NA   | 1  | 0              | Low-quality     | Genome-fragment | NA  | 0.5   | 0     |
| S10_vs_44684  full          | 4624  | No  | NA   | 4  | Not-determined | Genome-fragment | NA              | 1.4 | 0     |       |
| S10_vs_44739  full          | 1410  | No  | NA   | 0  | 0              | Not-determined  | Genome-fragment | NA  | 2.54  | 0     |
| S7_extracted_134662         | 3430  | No  | NA   | 0  | 2              | Low-quality     | Genome-fragment | NA  | 1.8   | 0     |
| S10_vs_44823  full          | 8432  | No  | NA   | 3  | 1              | Not-determined  | Genome-fragment | NA  | 7.99  | 0     |
| S10_vs_44847  full          | 4636  | No  | NA   | 0  | 1              | Not-determined  | Genome-fragment | NA  | 9.9   | 0     |
| S10_vs_44891  full          | 5002  | No  | NA   | 0  | 2              | Not-determined  | Genome-fragment | NA  | 12.4  | 0     |
| S10_vs_44963  full          | 3069  | No  | NA   | 0  | 4              | Not-determined  | Genome-fragment | NA  | 3.64  | 0     |
| S10_vs_45039  full          | 1158  | No  | NA   | 0  | 0              | Not-determined  | Genome-fragment | NA  | 7.65  | 0     |
| S4_extracted_4557           | 3430  | No  | NA   | 1  | 0              | Low-quality     | Genome-fragment | NA  | 0.3   | 0     |
| S10_vs_45345  full          | 1454  | No  | NA   | 0  | 0              | Not-determined  | Genome-fragment | NA  | 3.9   | 0     |
| S10_vs_45424  full          | 1488  | No  | NA   | 0  | 0              | Not-determined  | Genome-fragment | NA  | 12.23 | 0     |
| S11_vs_k141_18499  full     | 3431  | No  | NA   | 2  | 0              | Low-quality     | Genome-fragment | NA  | 11.25 | 0     |
| S10_vs_45629  full          | 92747 | No  | NA   | 0  | 18             | Not-determined  | Genome-fragment | NA  | 4.62  | 0     |
| S10_extracted_200732        | 3432  | No  | NA   | 0  | 0              | Low-quality     | Genome-fragment | NA  | 3.22  | 0     |
| S12_vs_k141_86417  full     | 3431  | No  | NA   | 0  | 2              | Low-quality     | Genome-fragment | NA  | 4.08  | 0     |
| S10_vs_45832  full          | 1337  | No  | NA   | 0  | 0              | Not-determined  | Genome-fragment | NA  | 0     | 0     |
| S8_extracted_k141_55168     | 3432  | No  | NA   | 0  | 2              | Low-quality     | Genome-fragment | NA  | 10.69 | 0     |
| S10_vs_46014  full          | 2759  | No  | NA   | 0  | 2              | Not-determined  | Genome-fragment | NA  | 8.72  | 0     |
| S10_vs_46096  full          | 1565  | No  | NA   | 0  | 1              | Not-determined  | Genome-fragment | NA  | 8.61  | 0     |
| S11_extracted_k141_2608     | 3433  | No  | NA   | 1  | 0              | Low-quality     | Genome-fragment | NA  | 9.43  | 0     |
| S10_vs_29645  full          | 3433  | No  | NA   | 2  | 0              | Low-quality     | Genome-fragment | NA  | 8.45  | 0     |
| S10_vs_46228  full          | 1252  | No  | NA   | 0  | 0              | Not-determined  | Genome-fragment | NA  | 8.89  | 0     |
| S10_vs_46265  full          | 5600  | No  | NA   | 0  | 2              | Not-determined  | Genome-fragment | NA  | 8.49  | 0     |
| S16_extracted_124438        | 3434  | No  | NA   | 0  | 0              | Low-quality     | Genome-fragment | NA  | 11.38 | 0     |
| S10_vs_46508  full          | 4642  | No  | NA   | 0  | 2              | Not-determined  | Genome-fragment | NA  | 3.3   | 0     |
| S17_extracted_k141_170317   | 3435  | No  | NA   | 0  | 1              | Low-quality     | Genome-fragment | NA  | 0     | 0     |
| S5_vs_k141_1792  full       | 3435  | No  | NA   | 0  | 2              | Low-quality     | Genome-fragment | NA  | 0     | 0     |
| S10_vs_46632  full          | 1233  | No  | NA   | 0  | 1              | Not-determined  | Genome-fragment | NA  | 0     | 0     |
| S10_vs_46663  full          | 1189  | No  | NA   | 0  | 1              | Not-determined  | Genome-fragment | NA  | 100   | 0     |
| S10_vs_46819  full          | 34655 | No  | NA   | 19 | 1              | High-quality    | High-quality    | NA  | 7.65  | 0     |
| S12_vs_k141_100604  [H2gene | 3436  | No  | NA   | 0  | 0              | Low-quality     | Genome-fragment | NA  | 0.94  | 48.91 |
| S10_vs_46952  full          | 2897  | No  | NA   | 0  | 3              | Not-determined  | Genome-fragment | NA  | 3     | 0     |
| S10_vs_47199  full          | 6444  | No  | NA   | 0  | 4              | Not-determined  | Genome-fragment | NA  | 0     | 0     |
| S10_vs_47432  full          | 1681  | No  | NA   | 0  | 2              | Not-determined  | Genome-fragment | NA  | 0     | 0     |
| S10_vs_47722  full          | 1525  | No  | NA   | 0  | 0              | Not-determined  | Genome-fragment | NA  | 0     | 0     |
| S10_vs_47957  full          | 2851  | No  | NA   | 0  | 1              | Not-determined  | Genome-fragment | NA  | 0     | 0     |
| S10_vs_48024  full          | 1748  | No  | NA   | 0  | 0              | Not-determined  | Genome-fragment | NA  | 4.46  | 0     |
| S8_extracted_k141_44417     | 3436  | No  | NA   | 0  | 2              | Low-quality     | Genome-fragment | NA  | 0.3   | 0     |
| S8_extracted_k141_157799    | 3436  | No  | NA   | 0  | 1              | Low-quality     | Genome-fragment | NA  | 3.9   | 0     |
| S8_extracted_k141_59922     | 3437  | No  | NA   | 1  | 0              | Low-quality     | Genome-fragment | NA  | 12.23 | 0     |
| S10_vs_48141  full          | 7663  | No  | NA   | 3  | 0              | Not-determined  | Genome-fragment | NA  | 11.25 | 0     |
| S8_extracted_k141_57513     | 3437  | No  | NA   | 0  | 0              | Low-quality     | Genome-fragment | NA  | 4.62  | 0     |
| S3_vs_k141_13713  full      | 3438  | No  | NA   | 3  | 0              | Low-quality     | Genome-fragment | NA  | 3.22  | 0     |
| S10_extracted_117206        | 3438  | No  | NA   | 0  | 0              | Low-quality     | Genome-fragment | NA  | 4.08  | 0     |
| S10_vs_48333  full          | 1248  | No  | NA   | 0  | 0              | Not-determined  | Genome-fragment | NA  | 0     | 0     |
| S6_vs_k141_18488  full      | 3438  | No  | NA   | 1  | 0              | Low-quality     | Genome-fragment | NA  | 0     | 0     |
| S10_vs_48360  full          | 2033  | No  | NA   | 3  | 1              | Not-determined  | Genome-fragment | NA  | 0     | 0     |
| S8_vs_k141_135617  full     | 3438  | No  | NA   | 1  | 0              | Low-quality     | Genome-fragment | NA  | 0     | 0     |
| S10_vs_48393  full          | 2602  | No  | NA   | 0  | 1              | Not-determined  | Genome-fragment | NA  | 0     | 0     |
| S10_vs_48579  full          | 3721  | No  | NA   | 0  | 1              | Not-determined  | Genome-fragment | NA  | 0.94  | 48.91 |
| S10_vs_48654  full          | 1314  | No  | NA   | 0  | 1              | Low-quality     | Genome-fragment | NA  | 3     | 0     |
| S3_extracted_k141_32570     | 3439  | Yes | 1757 | 1  | 1              | Low-quality     | Genome-fragment | NA  | 9.29  | 0     |
| S5_vs_k141_106183  full     | 3439  | No  | NA   | 0  | 0              | Low-quality     | Genome-fragment | NA  | 0     | 0     |
| S11_vs_k141_126071  full    | 3441  | No  | NA   | 0  | 0              | Low-quality     | Genome-fragment | NA  | 0     | 0     |
| S10_vs_48893  full          | 6521  | No  | NA   | 0  | 5              | Not-determined  | Genome-fragment | NA  | 0     | 0     |
| S10_vs_49001  full          | 2887  | No  | NA   | 0  | 1              | Not-determined  | Genome-fragment | NA  | 0     | 0     |
| S10_vs_49124  full          | 2386  | No  | NA   | 0  | 2              | Not-determined  | Genome-fragment | NA  | 0     | 0     |
| S10_vs_49136  full          | 2447  | No  | NA   | 0  | 2              | Not-determined  | Genome-fragment | NA  | 0     | 0     |
| S3_vs_k141_69161  full      | 3441  | No  | NA   | 3  | 0              | Low-quality     | Genome-fragment | NA  | 10.69 | 0     |
| S10_vs_49244  full          | 2236  | No  | NA   | 0  | 2              | Not-determined  | Genome-fragment | NA  | 8.72  | 0     |
| S12_vs_k141_99363  full     | 3441  | No  | NA   | 0  | 0              | Low-quality     | Genome-fragment | NA  | 8.61  | 0     |
| S10_vs_49290  full          | 5735  | No  | NA   | 0  | 0              | Not-determined  | Genome-fragment | NA  | 9.43  | 0     |
| S8_vs_k141_40352  full      | 3441  | No  | NA   | 0  | 0              | Low-quality     | Genome-fragment | NA  | 8.45  | 0     |
| S3_extracted_k141_34737     | 3442  | No  | NA   | 0  | 2              | Low-quality     | Genome-fragment | NA  | 8.89  | 0     |
| S5_extracted_k141_14024     | 3442  | No  | NA   | 2  | 0              | Low-quality     | Genome-fragment | NA  | 8.49  | 0     |
| S14_vs_k141_52421  full     | 3445  | No  | NA   | 4  | 0              | Low-quality     | Genome-fragment | NA  | 11.38 | 0     |
| S10_vs_49394  full          | 3217  | No  | NA   | 0  | 2              | Not-determined  | Genome-fragment | NA  | 3.3   | 0     |
| S10_vs_49429  full          | 1323  | No  | NA   | 0  | 1              | Not-determined  | Genome-fragment | NA  | 0     | 0     |
| S14_vs_k141_58913  full     | 3446  | No  | NA   | 0  | 0              | Low-quality     | Genome-fragment | NA  | 0     | 0     |
| S10_vs_49473  full          | 1013  | No  | NA   | 0  | 0              | Not-determined  | Genome-fragment | NA  | 0     | 0     |
| S10_vs_49540  full          | 1353  | No  | NA   | 0  | 1              | Not-determined  | Genome-fragment | NA  | 0     | 0     |
| S10_vs_49599  full          | 1114  | No  | NA   | 0  | 1              | Not-determined  | Genome-fragment | NA  | 0     | 0     |
| S1_extracted_k141_25667     | 3446  | No  | NA   | 3  | 0              | Low-quality     | Genome-fragment | NA  | 10.19 | 0     |
| S10_vs_49627  full          | 1404  | No  | NA   | 0  | 1              | Not-determined  | Genome-fragment | NA  | 0     | 0     |
| S10_vs_49694  full          | 4416  | No  | NA   | 0  | 0              | Not-determined  | Genome-fragment | NA  | 0     | 0     |
| S10_vs_49716  full          | 3531  | No  | NA   | 0  | 3              | Not-determined  | Genome-fragment | NA  | 8.28  | 0     |
| S10_vs_49726  full          | 4574  | No  | NA   | 0  | 2              | Not-determined  | Genome-fragment | NA  | 0.87  | 0     |
| S10_vs_49985  full          | 1309  | No  | NA   | 0  | 1              | Not-determined  | Genome-fragment | NA  | 0     | 0     |
| S16_extracted_17902         | 3446  | No  | NA   | 1  | 0              | Low-quality     | Genome-fragment | NA  | 8.28  | 0     |
| S16_extracted_79364         | 3446  | No  | NA   | 1  | 1              | Low-quality     | Genome-fragment | NA  | 0.87  | 0     |
| S10_vs_50130  full          | 1440  | No  | NA   | 0  | 0              | Not-determined  | Genome-fragment | NA  | 0     | 0     |
| S10_vs_50319  full          | 2425  | No  | NA   | 0  | 2              | Not-determined  | Genome-fragment | NA  | 0     | 0     |
| S10_vs_50350  full          | 1574  | No  | NA   | 0  | 2              | Not-determined  | Genome-fragment | NA  | 0     | 0     |
| S6_vs_k141_40320  full      | 3446  | No  | NA   | 0  | 0              | Low-quality     | Genome-fragment | NA  | 8.2   | 0     |
| S10_vs_50459  full          | 37645 | No  | NA   | 0  | 7              | Not-determined  | Genome-fragment | NA  | 0     | 0     |
| S1_extracted_k141_10199     | 3448  | No  | NA   | 0  | 0              | Low-quality     | Genome-fragment | NA  | 8.42  | 0     |
| S11_vs_k141_48160  full     | 3449  | No  | NA   | 0  | 0              | Low-quality     | Genome-fragment | NA  | 5.17  | 0     |
| S16_vs_53303  full          | 3450  | No  | NA   | 0  | 1              | Low-quality     | Genome-fragment | NA  | 25.58 | 0     |
| S10_vs_50796  full          | 5591  | No  | NA   | 0  | 3              | Not-determined  | Genome-fragment | NA  | 0     | 0     |
| S6_extracted_k141_11284     | 3450  | No  | NA   | 0  | 0              | Low-quality     | Genome-fragment | NA  | 2.44  | 0     |
| S5_extracted_k141_31772     | 3451  | No  | NA   | 0  | 1              | Low-quality     | Genome-fragment | NA  | 5.76  | 0     |
| S16_vs_18767  full          | 3451  | No  | NA   | 0  | 3              | Low-quality     | Genome-fragment | NA  | 11.02 | 0     |
| S8_extracted_k141_63599     | 3451  | No  | NA   | 0  | 0              | Low-quality     | Genome-fragment | NA  | 1.51  | 0     |
| S9_extracted_k141_81998     | 3452  | No  | NA   | 5  | 0              | Low-quality     | Genome-fragment | NA  | 11.38 | 0     |
| S10_vs_51321  full          | 4623  | No  | NA   | 0  | 4              | Not-determined  | Genome-fragment | NA  | 0     | 0     |
| S3_vs_k141_42766  full      | 3452  | No  | NA   | 2  | 0              | Low-quality     | Genome-fragment | NA  | 10.15 | 0     |
| S10_vs_51371  full          | 2005  | No  | NA   | 0  | 0              | Not-determined  | Genome-fragment | NA  | 0     | 0     |
| S10_vs_51412  full          | 2846  | No  | NA   | 0  | 1              | Not-determined  | Genome-fragment | NA  | 9.53  | 0     |
| S16_extracted_107945        | 3452  | No  | NA   | 3  | 0              | Low-quality     | Genome-fragment | NA  | 0     | 0     |
| S10_vs_51490  full          | 2912  | No  | NA   | 0  | 2              | Not-determined  | Genome-fragment | NA  | 0     | 0     |
| S10_vs_51537  full          | 5247  | No  | NA   | 0  | 4              | Not-determined  | Genome-fragment | NA  | 0     | 0     |
| S8_vs_k141_162198  full     | 3453  | No  | NA   | 0  | 1              | Low-quality     | Genome-fragment | NA  | 5.48  | 0     |
| S10_vs_51588  full          |       |     |      |    |                |                 |                 |     |       |       |



|                           |       |     |      |    |    |                |                 |       |       |
|---------------------------|-------|-----|------|----|----|----------------|-----------------|-------|-------|
| S16_vs_10924  full        | 3464  | No  | NA   | 1  | 0  | Low-quality    | Genome-fragment | 6.17  | 0     |
| S10_vs_4333  full         | 1729  | No  | NA   | 0  | 0  | Not-determined | Genome-fragment | NA    | 0     |
| S10_vs_54408  full        | 1572  | No  | NA   | 0  | 0  | Not-determined | Genome-fragment | NA    | 0     |
| S11_extracted_k141_87540  | 3465  | No  | NA   | 1  | 0  | Low-quality    | Genome-fragment | 2.24  | 0     |
| S3_vs_k141_45007  full    | 3465  | No  | NA   | 1  | 0  | Low-quality    | Genome-fragment | 5.63  | 0     |
| S5_vs_k141_48861  full    | 3465  | No  | NA   | 1  | 0  | Low-quality    | Genome-fragment | 5.8   | 0     |
| S10_vs_54627  full        | 2772  | No  | NA   | 0  | 2  | Not-determined | Genome-fragment | NA    | 0     |
| S10_vs_54640  full        | 7436  | No  | NA   | 0  | 5  | Not-determined | Genome-fragment | NA    | 0     |
| S10_vs_54659  full        | 2214  | No  | NA   | 0  | 2  | Not-determined | Genome-fragment | NA    | 0     |
| S10_vs_54670  full        | 1733  | No  | NA   | 0  | 1  | Not-determined | Genome-fragment | NA    | 0     |
| S10_vs_54861  full        | 1107  | No  | NA   | 0  | 0  | Not-determined | Genome-fragment | NA    | 0     |
| S8_extracted_k141_142919  | 3465  | No  | NA   | 0  | 2  | Low-quality    | Genome-fragment | 0.99  | 0     |
| S1_vs_k141_69364  full    | 3466  | No  | NA   | 1  | 0  | Low-quality    | Genome-fragment | 9.61  | 0     |
| S7_vs_11021  full         | 3466  | No  | NA   | 0  | 0  | Low-quality    | Genome-fragment | 6.76  | 0     |
| S10_vs_55112  full        | 1473  | No  | NA   | 0  | 1  | Not-determined | Genome-fragment | NA    | 0     |
| S14_extracted_k141_103792 | 3467  | No  | NA   | 1  | 0  | Low-quality    | Genome-fragment | 1.62  | 0     |
| S10_vs_55276  full        | 1063  | No  | NA   | 0  | 0  | Not-determined | Genome-fragment | NA    | 0     |
| S10_vs_55361  full        | 1433  | No  | NA   | 0  | 0  | Not-determined | Genome-fragment | NA    | 0     |
| S10_vs_55497  full        | 2529  | No  | NA   | 0  | 2  | Not-determined | Genome-fragment | NA    | 0     |
| S10_vs_55725  full        | 4549  | No  | NA   | 0  | 1  | Not-determined | Genome-fragment | NA    | 0     |
| S10_extracted_95732       | 3467  | No  | NA   | 2  | 1  | Low-quality    | Genome-fragment | 1.99  | 0     |
| S8_extracted_k141_21360   | 3467  | No  | NA   | 1  | 3  | Low-quality    | Genome-fragment | 1.07  | 0     |
| S10_vs_55783  full        | 2201  | No  | NA   | 0  | 0  | Not-determined | Genome-fragment | NA    | 0     |
| S10_vs_55790  full        | 1362  | No  | NA   | 0  | 1  | Not-determined | Genome-fragment | NA    | 0     |
| S10_vs_55799  full        | 1420  | No  | NA   | 0  | 2  | Not-determined | Genome-fragment | NA    | 0     |
| S5_vs_k141_12406  full    | 3468  | No  | NA   | 0  | 0  | Low-quality    | Genome-fragment | 7.29  | 0     |
| S8_extracted_k141_73786   | 3468  | No  | NA   | 0  | 3  | Low-quality    | Genome-fragment | 1.33  | 0     |
| S10_vs_55895  full        | 1498  | No  | NA   | 0  | 2  | Not-determined | Genome-fragment | NA    | 0     |
| S10_vs_55925  full        | 1574  | No  | NA   | 1  | 1  | Not-determined | Genome-fragment | NA    | 0     |
| S7_vs_29311  full         | 3469  | Yes | 2215 | 1  | 1  | Low-quality    | Genome-fragment | 3.75  | 36.15 |
| S10_vs_56000  full        | 3040  | No  | NA   | 0  | 0  | Not-determined | Genome-fragment | NA    | 0     |
| S10_vs_56007  full        | 1939  | No  | NA   | 0  | 1  | Not-determined | Genome-fragment | NA    | 0     |
| S10_extracted_76746       | 3469  | No  | NA   | 0  | 1  | Low-quality    | Genome-fragment | 3.62  | 0     |
| S6_vs_k141_29828  full    | 3469  | No  | NA   | 1  | 0  | Low-quality    | Genome-fragment | 5.05  | 0     |
| S17_vs_k141_170340  full  | 3470  | No  | NA   | 0  | 0  | Low-quality    | Genome-fragment | 8.1   | 0     |
| S11_extracted_k141_79867  | 3470  | No  | NA   | 0  | 1  | Low-quality    | Genome-fragment | 3.21  | 0     |
| S11_extracted_k141_63087  | 3470  | No  | NA   | 3  | 0  | Low-quality    | Genome-fragment | 5.9   | 0     |
| S10_vs_56387  full        | 1296  | No  | NA   | 0  | 0  | Not-determined | Genome-fragment | NA    | 0     |
| S1_vs_k141_150556  full   | 3470  | No  | NA   | 0  | 0  | Low-quality    | Genome-fragment | 8.18  | 0     |
| S10_vs_56421  full        | 4036  | No  | NA   | 0  | 1  | Not-determined | Genome-fragment | NA    | 0     |
| S12_vs_k141_52432  full   | 3470  | No  | NA   | 0  | 1  | Low-quality    | Genome-fragment | 9.96  | 0     |
| S17_extracted_k141_15349  | 3471  | Yes | 1470 | 0  | 3  | Low-quality    | Genome-fragment | 1.08  | 57.65 |
| S3_vs_k141_112598  full   | 3471  | No  | NA   | 3  | 0  | Low-quality    | Genome-fragment | 2.05  | 0     |
| S10_vs_56780  full        | 1428  | No  | NA   | 0  | 2  | Not-determined | Genome-fragment | NA    | 0     |
| S15_extracted_63325       | 3471  | No  | NA   | 1  | 0  | Low-quality    | Genome-fragment | 9.85  | 0     |
| S10_vs_57099  full        | 3328  | No  | NA   | 1  | 1  | Not-determined | Genome-fragment | NA    | 0     |
| S10_vs_57101  full        | 3247  | No  | NA   | 0  | 2  | Not-determined | Genome-fragment | NA    | 0     |
| S10_vs_57120  full        | 13222 | No  | NA   | 0  | 4  | Not-determined | Genome-fragment | NA    | 0     |
| S5_vs_k141_60813  full    | 3472  | No  | NA   | 2  | 0  | Low-quality    | Genome-fragment | 2.77  | 0     |
| S3_extracted_k141_28381   | 3472  | No  | NA   | 5  | 0  | Low-quality    | Genome-fragment | 15.84 | 0     |
| S6_vs_k141_45209  full    | 3472  | No  | NA   | 7  | 0  | Low-quality    | Genome-fragment | 8.67  | 0     |
| S8_extracted_k141_147213  | 3472  | No  | NA   | 0  | 0  | Low-quality    | Genome-fragment | 5.29  | 0     |
| S10_vs_57436  full        | 4129  | No  | NA   | 0  | 1  | Not-determined | Genome-fragment | NA    | 0     |
| S10_vs_57517  full        | 5670  | No  | NA   | 0  | 3  | Not-determined | Genome-fragment | NA    | 0     |
| S14_extracted_k141_57286  | 3473  | No  | NA   | 0  | 0  | Low-quality    | Genome-fragment | 8.37  | 0     |
| S7_vs_60786  full         | 3473  | No  | NA   | 4  | 0  | Low-quality    | Genome-fragment | 8.07  | 0     |
| S10_vs_57686  full        | 7237  | No  | NA   | 0  | 2  | Not-determined | Genome-fragment | NA    | 0     |
| S10_vs_58009  full        | 7401  | No  | NA   | 0  | 4  | Not-determined | Genome-fragment | NA    | 0     |
| S10_vs_58014  full        | 35404 | No  | NA   | 0  | 2  | Medium-quality | Genome-fragment | 82.66 | 0     |
| S10_vs_58048  full        | 1404  | No  | NA   | 0  | 0  | Not-determined | Genome-fragment | NA    | 0     |
| S7_vs_11655  full         | 3473  | No  | NA   | 0  | 1  | Low-quality    | Genome-fragment | 7.87  | 0     |
| S10_vs_58204  full        | 2305  | No  | NA   | 0  | 0  | Not-determined | Genome-fragment | NA    | 0     |
| S10_vs_58223  full        | 2135  | No  | NA   | 0  | 1  | Not-determined | Genome-fragment | NA    | 0     |
| S11_vs_k141_6538  full    | 3474  | No  | NA   | 4  | 0  | Low-quality    | Genome-fragment | 8.56  | 0     |
| S10_vs_58994  full        | 3474  | No  | NA   | 2  | 0  | Low-quality    | Genome-fragment | 2.21  | 0     |
| S10_vs_58505  full        | 12794 | No  | NA   | 0  | 11 | Not-determined | Genome-fragment | NA    | 0     |
| S10_vs_58567  full        | 3495  | No  | NA   | 0  | 1  | Not-determined | Genome-fragment | NA    | 0     |
| S9_vs_k141_44394  full    | 3476  | No  | NA   | 0  | 1  | Low-quality    | Genome-fragment | 1.93  | 0     |
| S10_vs_58722  full        | 1657  | No  | NA   | 0  | 0  | Not-determined | Genome-fragment | NA    | 0     |
| S10_vs_58745  full        | 2889  | No  | NA   | 0  | 2  | Not-determined | Genome-fragment | NA    | 0     |
| S14_extracted_k141_105641 | 3476  | No  | NA   | 9  | 0  | Low-quality    | Genome-fragment | 11.47 | 0     |
| S10_vs_58891  full        | 1179  | No  | NA   | 1  | 0  | Not-determined | Genome-fragment | NA    | 0     |
| S17_vs_k141_170070  full  | 3477  | No  | NA   | 0  | 3  | Low-quality    | Genome-fragment | 11.1  | 0     |
| S1_vs_k141_35417  full    | 3477  | No  | NA   | 3  | 0  | Low-quality    | Genome-fragment | 9.28  | 0     |
| S10_vs_59004  full        | 1475  | No  | NA   | 0  | 0  | Not-determined | Genome-fragment | NA    | 0     |
| S7_vs_130081  full        | 3477  | No  | NA   | 3  | 0  | Low-quality    | Genome-fragment | 7.89  | 0     |
| S10_vs_59188  full        | 2127  | No  | NA   | 0  | 2  | Not-determined | Genome-fragment | NA    | 0     |
| S10_vs_59230  full        | 2335  | No  | NA   | 0  | 0  | Not-determined | Genome-fragment | NA    | 0     |
| S10_vs_59256  full        | 5648  | No  | NA   | 0  | 2  | Not-determined | Genome-fragment | NA    | 0     |
| S10_vs_59302  full        | 1227  | No  | NA   | 0  | 1  | Not-determined | Genome-fragment | NA    | 0     |
| S10_vs_59487  full        | 1344  | No  | NA   | 0  | 1  | Not-determined | Genome-fragment | NA    | 0     |
| S10_vs_57051  full        | 3477  | No  | NA   | 0  | 0  | Low-quality    | Genome-fragment | 1.76  | 0     |
| S10_vs_59929  full        | 1529  | No  | NA   | 0  | 2  | Not-determined | Genome-fragment | NA    | 0     |
| S11_vs_k141_2159  full    | 3478  | No  | NA   | 0  | 0  | Low-quality    | Genome-fragment | 8.12  | 0     |
| S10_vs_60276  full        | 5662  | No  | NA   | 0  | 1  | Not-determined | Genome-fragment | NA    | 0     |
| S10_vs_60294  full        | 2976  | No  | NA   | 0  | 3  | Not-determined | Genome-fragment | NA    | 0     |
| S10_vs_60316  full        | 1068  | No  | NA   | 0  | 0  | Not-determined | Genome-fragment | NA    | 0     |
| S12_extracted_k141_735    | 3479  | No  | NA   | 2  | 0  | Low-quality    | Genome-fragment | 5.29  | 0     |
| S10_vs_60404  full        | 5136  | No  | NA   | 0  | 2  | Not-determined | Genome-fragment | NA    | 0     |
| S12_extracted_k141_70305  | 3479  | No  | NA   | 1  | 0  | Low-quality    | Genome-fragment | 5.43  | 0     |
| S12_vs_k141_46870  full   | 3479  | No  | NA   | 0  | 2  | Low-quality    | Genome-fragment | 1.34  | 0     |
| S10_vs_60621  full        | 1232  | No  | NA   | 0  | 0  | Not-determined | Genome-fragment | NA    | 0     |
| S10_vs_60675  full        | 11671 | No  | NA   | 0  | 1  | Not-determined | Genome-fragment | NA    | 0     |
| S10_vs_60677  full        | 5372  | No  | NA   | 0  | 2  | Not-determined | Genome-fragment | NA    | 0     |
| S10_vs_60742  full        | 2252  | No  | NA   | 0  | 1  | Not-determined | Genome-fragment | NA    | 0     |
| S13_vs_56415  full        | 3480  | No  | NA   | 0  | 1  | Low-quality    | Genome-fragment | 8.12  | 0     |
| S10_vs_60810  full        | 3105  | No  | NA   | 0  | 0  | Not-determined | Genome-fragment | NA    | 0     |
| S10_vs_60937  full        | 1108  | No  | NA   | 0  | 1  | Not-determined | Genome-fragment | NA    | 0     |
| S14_extracted_k141_66839  | 3480  | No  | NA   | 0  | 0  | Low-quality    | Genome-fragment | 11.48 | 0     |
| S9_extracted_k141_81478   | 3481  | No  | NA   | 2  | 0  | Low-quality    | Genome-fragment | 6.91  | 0     |
| S10_vs_61200  full        | 2832  | No  | NA   | 0  | 2  | Not-determined | Genome-fragment | NA    | 0     |
| S14_vs_k141_69076  full   | 3481  | No  | NA   | 0  | 0  | Low-quality    | Genome-fragment | 6.49  | 0     |
| S14_extracted_k141_37700  | 3482  | No  | NA   | 0  | 0  | Low-quality    | Genome-fragment | 8.42  | 0     |
| S10_vs_61658  full        | 3935  | No  | NA   | 0  | 1  | Not-determined | Genome-fragment | NA    | 0     |
| S3_extracted_k141_50738   | 3482  | No  | NA   | 2  | 0  | Low-quality    | Genome-fragment | 1.6   | 0     |
| S10_vs_61869  full        | 5675  | No  | NA   | 0  | 3  | Not-determined | Genome-fragment | NA    | 0     |
| S10_vs_61888  full        | 4737  | No  | NA   | 0  | 3  | Not-determined | Genome-fragment | NA    | 0     |
| S16_extracted_96283       | 3482  | No  | NA   | 0  | 1  | Low-quality    | Genome-fragment | 2.32  | 0     |
| S10_vs_120955  full       | 3482  | No  | NA   | 0  | 0  | Low-quality    | Genome-fragment | 6.55  | 0     |
| S6_vs_k141_27953  full    | 3482  | No  | NA   | 0  | 0  | Low-quality    | Genome-fragment | 5.74  | 0     |
| S10_vs_62124  full        | 8089  | No  | NA   | 0  | 5  | Not-determined | Genome-fragment | NA    | 0     |
| S8_extracted_k141_177530  | 3482  | No  | NA   | 6  | 0  | Low-quality    | Genome-fragment | 2.54  | 0     |
| S5_vs_k141_50928  full    | 3483  | No  | NA   | 1  | 0  | Low-quality    | Genome-fragment | 8.04  | 0     |
| S5_vs_k141_125288  12gene | 3483  | No  | NA   | 1  | 0  | Low-quality    | Genome-fragment | 2.23  | 0     |
| S10_vs_62438  full        | 11690 | No  | NA   | 4  | 0  | Not-determined | Genome-fragment | NA    | 0     |
| S10_vs_62496  full        | 1576  | No  | NA   | 0  | 1  | Not-determined | Genome-fragment | NA    | 0     |
| S16_vs_160696  full       | 3483  | No  | NA   | 1  | 0  | Low-quality    | Genome-fragment | 5.24  | 0     |
| S10_vs_62629  full        | 2323  | No  | NA   | 0  | 1  | Not-determined | Genome-fragment | NA    | 0     |
| S10_extracted_26727       | 3484  | No  | NA   | 0  | 0  | Low-quality    | Genome-fragment | 7.49  | 0     |
| S10_vs_62776  full        | 69036 | No  | NA   | 13 | 2  | High-quality   | High-quality    | 90.32 | 0     |
| S10_vs_62860  full        | 17922 | No  | NA   | 0  | 3  | Not-determined | Genome-fragment | NA    | 0     |
| S10_vs_63001  full        | 1052  | No  | NA   | 0  | 1  | Not-determined | Genome-fragment | NA    | 0     |
| S17_vs_k141_25516  full   | 3486  | No  | NA   | 0  | 1  | Low-quality    | Genome-fragment | 7.43  | 0     |
| S10_vs_63045  full        | 2788  | No  | NA   | 0  | 1  | Not-determined | Genome-fragment | NA    | 0     |
| S10_vs_63246  full        | 4267  | No  | NA   | 0  | 4  | Not-determined | Genome-fragment | NA    | 0     |
| S10_vs_63272  full        | 1746  | No  | NA   | 0  | 1  | Not-determined | Genome-fragment | NA    | 0     |
| S16_extracted_139136      | 3486  | No  | NA   | 0  | 3  | Low-quality    | Genome-fragment | 11.63 | 0     |
| S11_vs_k141_1117  full    | 3487  | No  | NA   | 0  | 0  | Low-quality    | Genome-fragment | 5.82  | 0     |
| S3_extracted_k141_28654   | 3487  | No  | NA   | 0  | 0  | Low-quality    | Genome-fragment | 5.69  | 0     |
| S10_vs_63344  full        | 1271  | No  | NA   | 0  | 1  | Not-determined | Genome-fragment | NA    | 0     |
| S10_vs_63373  full        | 6825  | No  | NA   | 0  | 3  | Not-determined | Genome-fragment | NA    | 0     |
| S12_extracted_k141_45987  | 3487  | No  | NA   | 2  | 0  | Low-quality    | Genome-fragment | 15.62 | 0     |
| S6_vs_k141_37276  full    | 3487  | No  | NA   | 0  | 4  | Low-quality    | Genome-fragment | 2.88  | 0     |
| S10_vs_63632  full        | 3603  | No  | NA   | 0  | 3  | Not-determined | Genome-fragment | NA    | 0     |
| S10_vs_63681  full        | 2947  | No  | NA   | 0  | 1  | Not-determined | Genome-fragment | NA    | 0     |
| S10_vs_63704  full        | 4099  | No  | NA   | 0  | 3  | Not-determined | Genome-fragment | NA    | 0     |
| S17_vs_k141_50138  full   | 3488  | No  | NA   | 0  | 3  | Low-quality    | Genome-fragment | 2.84  | 0     |
| S10_vs_63979  full        | 2623  | No  | NA   | 0  | 0  | Not-determined | Genome-fragment | NA    | 0     |
| S10_vs_64065  full        | 5013  | No  | NA   | 0  | 1  | Not-determined | Genome-fragment | NA    | 0     |
| S5_extracted_k141_4457    | 3489  | No  | NA   | 3  | 0  | Low-quality    | Genome-fragment | 8.34  | 0     |
| S10_vs_64239  full        | 1834  | No  | NA   | 0  | 2  | Not-determined | Genome-fragment | NA    | 0     |
| S14_vs_k141_72124  full   | 3490  | No  | NA   | 0  | 0  | Low-quality    | Genome-fragment | 2.23  | 0     |
| S7_vs_62750  full         | 3491  | No  | NA   | 0  | 0  | Low-quality    | Genome-fragment | 7.24  | 0     |
| S10_vs_64492  full        | 2288  | No  | NA   | 0  | 1  | Not-determined | Genome-fragment | NA    | 0     |
| S10_vs_64510  full        | 3290  | No  | NA   | 0  | 0  | Not-determined | Genome-fragment | NA    | 0     |
| S10_vs_64737  full        | 2444  | No  | NA   | 0  | 1  | Not-determined | Genome-fragment | NA    | 0     |
| S8_vs_k141_18244  full    | 3491  | No  | NA   | 0  | 0  | Low-quality    | Genome-fragment | 6.09  |       |



|                           |       |     |    |      |    |                |                 |       |       |
|---------------------------|-------|-----|----|------|----|----------------|-----------------|-------|-------|
| S3_extracted_k141_109089  | 3496  | No  | NA | 1    | 0  | Low-quality    | Genome-fragment | 5.54  | 0     |
| S17_extracted_k141_126765 | 3497  | No  | NA | 0    | 0  | Low-quality    | Genome-fragment | 9.92  | 0     |
| S5_vs_k141_67471  full    | 38042 | No  | NA | 9    | 0  | Medium-quality | Genome-fragment | 76.5  | 0     |
| S5_vs_k141_104104  full   | 3497  | Yes |    | 1    | 1  | Low-quality    | Genome-fragment | 3.23  | 48.13 |
| S10_vs_67588  full        | 1781  | No  | NA | 0    | 2  | Not-determined | Genome-fragment | NA    | 0     |
| S10_vs_67607  full        | 2012  | No  | NA | 0    | 0  | Not-determined | Genome-fragment | NA    | 0     |
| S17_extracted_k141_98644  | 3498  | No  | NA | 6    | 0  | Low-quality    | Genome-fragment | 5.88  | 0     |
| S10_vs_67624  full        | 2156  | No  | NA | 0    | 1  | Not-determined | Genome-fragment | NA    | 0     |
| S10_vs_67626  full        | 1590  | No  | NA | 0    | 0  | Not-determined | Genome-fragment | NA    | 1.77  |
| S10_vs_67643  full        | 2041  | No  | NA | 0    | 0  | Not-determined | Genome-fragment | NA    | 0     |
| S10_vs_67664  full        | 1632  | No  | NA | 0    | 0  | Not-determined | Genome-fragment | NA    | 0     |
| S14_vs_k141_96625  full   | 3499  | No  | NA | 4    | 0  | Low-quality    | Genome-fragment | 6.73  | 0     |
| S10_vs_67682  full        | 2122  | No  | NA | 0    | 2  | Not-determined | Genome-fragment | NA    | 0     |
| S1_vs_k141_97225  full    | 3501  | No  | NA | 2    | 0  | Low-quality    | Genome-fragment | 7.91  | 0     |
| S10_vs_67770  full        | 2993  | No  | NA | 0    | 0  | Not-determined | Genome-fragment | NA    | 0     |
| S10_vs_67771  full        | 1951  | No  | NA | 0    | 0  | Not-determined | Genome-fragment | NA    | 0     |
| S16_extracted_12418       | 3501  | No  | NA | 0    | 2  | Low-quality    | Genome-fragment | 5.08  | 0     |
| S10_vs_67795  full        | 1860  | No  | NA | 0    | 2  | Not-determined | Genome-fragment | NA    | 0     |
| S10_vs_67983  full        | 2219  | No  | NA | 0    | 1  | Not-determined | Genome-fragment | NA    | 0     |
| S10_vs_68036  full        | 3438  | No  | NA | 0    | 4  | Not-determined | Genome-fragment | NA    | 0     |
| S16_extracted_35486       | 3502  | Yes |    | 1    | 1  | Low-quality    | Genome-fragment | 1.97  | 68.53 |
| S16_vs_104817  full       | 3502  | No  | NA | 2    | 0  | Low-quality    | Genome-fragment | 5.56  | 0     |
| S12_vs_k141_4267  full    | 3502  | No  | NA | 1    | 0  | Low-quality    | Genome-fragment | 8.81  | 0     |
| S17_vs_k141_71371  full   | 3503  | No  | NA | 2    | 0  | Low-quality    | Genome-fragment | 2.03  | 0     |
| S9_extracted_k141_43544   | 3503  | No  | NA | 0    | 2  | Low-quality    | Genome-fragment | 1.39  | 0     |
| S10_vs_68055  full        | 1108  | No  | NA | 0    | 2  | Not-determined | Genome-fragment | NA    | 0     |
| S14_vs_k141_782  full     | 3503  | No  | NA | 0    | 2  | Low-quality    | Genome-fragment | 1     | 0     |
| S10_vs_68746  full        | 1899  | No  | NA | 0    | 2  | Not-determined | Genome-fragment | NA    | 0     |
| S10_vs_68799  full        | 1798  | No  | NA | 1    | 1  | Not-determined | Genome-fragment | NA    | 0     |
| S1_vs_k141_99935  full    | 3503  | No  | NA | 0    | 0  | Low-quality    | Genome-fragment | 24.49 | 0     |
| S16_extracted_166549      | 3503  | No  | NA | 0    | 2  | Low-quality    | Genome-fragment | 3.57  | 0     |
| S8_extracted_k141_86008   | 3504  | No  | NA | 0    | 0  | Low-quality    | Genome-fragment | 12.01 | 0     |
| S11_extracted_k141_13066  | 3505  | No  | NA | 0    | 3  | Low-quality    | Genome-fragment | 1.89  | 0     |
| S1_vs_k141_107455  full   | 3505  | No  | NA | 1    | 0  | Low-quality    | Genome-fragment | 6.88  | 0     |
| S7_vs_34761  full         | 3505  | No  | NA | 2    | 0  | Low-quality    | Genome-fragment | 8.54  | 0     |
| S12_vs_k141_128778  full  | 3505  | No  | NA | 1    | 0  | Low-quality    | Genome-fragment | 2.76  | 0     |
| S8_extracted_k141_88170   | 3505  | No  | NA | 0    | 3  | Low-quality    | Genome-fragment | 4.22  | 0     |
| S10_vs_69294  full        | 7718  | No  | NA | 0    | 4  | Not-determined | Genome-fragment | NA    | 0     |
| S10_vs_69561  full        | 3687  | No  | NA | 1    | 1  | Not-determined | Genome-fragment | NA    | 0     |
| S10_vs_69671  full        | 6078  | No  | NA | 0    | 4  | Not-determined | Genome-fragment | NA    | 0     |
| S10_vs_69675  full        | 1327  | No  | NA | 0    | 2  | Not-determined | Genome-fragment | NA    | 0     |
| S1_extracted_k141_108051  | 3506  | No  | NA | 0    | 0  | Low-quality    | Genome-fragment | 9.1   | 0     |
| S10_vs_69801  full        | 1527  | No  | NA | 0    | 0  | Not-determined | Genome-fragment | NA    | 0     |
| S10_vs_69845  full        | 2354  | No  | NA | 0    | 3  | Not-determined | Genome-fragment | NA    | 0     |
| S10_vs_70151  full        | 6958  | No  | NA | 0    | 2  | Not-determined | Genome-fragment | NA    | 0     |
| S10_vs_70156  full        | 5900  | No  | NA | 1    | 3  | Not-determined | Genome-fragment | NA    | 0     |
| S10_vs_70194  full        | 4460  | No  | NA | 0    | 0  | Not-determined | Genome-fragment | NA    | 0     |
| S10_vs_70222  full        | 12962 | No  | NA | 0    | 3  | Not-determined | Genome-fragment | NA    | 0     |
| S10_vs_70247  full        | 1143  | No  | NA | 0    | 0  | Not-determined | Genome-fragment | NA    | 0     |
| S15_extracted_34368       | 3506  | No  | NA | 3    | 0  | Low-quality    | Genome-fragment | 18.2  | 0     |
| S10_vs_36344  full        | 3507  | No  | NA | 0    | 2  | Low-quality    | Genome-fragment | 1.23  | 0     |
| S10_vs_116257  full       | 3507  | No  | NA | 1    | 0  | Low-quality    | Genome-fragment | 2.76  | 0     |
| S8_extracted_k141_157670  | 3507  | No  | NA | 0    | 0  | Low-quality    | Genome-fragment | 3.53  | 0     |
| S7_extracted_105981       | 3508  | No  | NA | 0    | 2  | Low-quality    | Genome-fragment | 0.89  | 0     |
| S10_vs_1091  full         | 38895 | No  | NA | 0    | 21 | Not-determined | Genome-fragment | NA    | 0     |
| S7_vs_11688  full         | 3509  | No  | NA | 0    | 0  | Low-quality    | Genome-fragment | 4.64  | 0     |
| S10_vs_71584  full        | 4736  | No  | NA | 0    | 2  | Not-determined | Genome-fragment | NA    | 0     |
| S10_vs_71731  full        | 7791  | No  | NA | 0    | 7  | Not-determined | Genome-fragment | NA    | 0     |
| S10_vs_71759  full        | 3720  | No  | NA | 0    | 2  | Not-determined | Genome-fragment | NA    | 0     |
| S5_vs_k141_102735  full   | 3510  | No  | NA | 0    | 1  | Low-quality    | Genome-fragment | 8.05  | 0     |
| S10_vs_71900  full        | 26708 | No  | NA | 2    | 0  | Medium-quality | Genome-fragment | 60.38 | 0     |
| S12_vs_k141_84063  full   | 3510  | No  | NA | 3    | 0  | Low-quality    | Genome-fragment | 3.2   | 0     |
| S4_extracted_10059        | 3510  | No  | NA | 0    | 1  | Low-quality    | Genome-fragment | 6.32  | 0     |
| S10_vs_72061  full        | 4345  | No  | NA | 0    | 1  | Not-determined | Genome-fragment | NA    | 0     |
| S10_vs_72075  full        | 2688  | No  | NA | 4    | 1  | Not-determined | Genome-fragment | NA    | 0     |
| S10_vs_72116  full        | 1624  | No  | NA | 0    | 0  | Not-determined | Genome-fragment | NA    | 0     |
| S11_extracted_k141_8464   | 3511  | No  | NA | 0    | 2  | Low-quality    | Genome-fragment | 6.79  | 0     |
| S10_vs_72263  full        | 1556  | No  | NA | 0    | 2  | Not-determined | Genome-fragment | NA    | 0     |
| S10_vs_72481  full        | 1239  | No  | NA | 0    | 0  | Not-determined | Genome-fragment | NA    | 0     |
| S11_extracted_k141_121243 | 3511  | No  | NA | 1    | 0  | Low-quality    | Genome-fragment | 6.71  | 0     |
| S10_vs_72981  full        | 5903  | No  | NA | 0    | 3  | Not-determined | Genome-fragment | NA    | 0     |
| S10_vs_34789  full        | 3511  | No  | NA | 1    | 1  | Low-quality    | Genome-fragment | 13.48 | 0     |
| S12_vs_k141_164355  full  | 3511  | Yes |    | 1    | 1  | Low-quality    | Genome-fragment | 1.68  | 29.17 |
| S10_vs_73238  full        | 1499  | No  | NA | 0    | 0  | Not-determined | Genome-fragment | NA    | 0     |
| S8_vs_k141_62016  full    | 3511  | No  | NA | 2    | 0  | Low-quality    | Genome-fragment | 2.33  | 0     |
| S10_vs_73521  full        | 2152  | No  | NA | 0    | 1  | Not-determined | Genome-fragment | NA    | 0     |
| S11_vs_k141_69823  full   | 3512  | No  | NA | 0    | 0  | Low-quality    | Genome-fragment | 3.04  | 0     |
| S10_vs_73688  full        | 6164  | No  | NA | 0    | 1  | Not-determined | Genome-fragment | NA    | 0     |
| S13_extracted_91230       | 3512  | No  | NA | 0    | 0  | Low-quality    | Genome-fragment | 3.49  | 0     |
| S10_vs_73794  full        | 5985  | No  | NA | 0    | 8  | Not-determined | Genome-fragment | NA    | 0     |
| S10_vs_73876  full        | 2226  | No  | NA | 0    | 0  | Not-determined | Genome-fragment | NA    | 0     |
| S10_vs_73979  full        | 11934 | No  | NA | 0    | 2  | Not-determined | Genome-fragment | NA    | 0     |
| S10_vs_74019  full        | 14211 | No  | NA | 0    | 9  | Not-determined | Genome-fragment | NA    | 0     |
| S10_vs_74028  full        | 1914  | No  | NA | 0    | 2  | Not-determined | Genome-fragment | NA    | 0     |
| S14_vs_k141_85422  full   | 3512  | No  | NA | 0    | 3  | Low-quality    | Genome-fragment | 2.4   | 0     |
| S10_vs_74110  full        | 2224  | No  | NA | 0    | 1  | Not-determined | Genome-fragment | NA    | 0     |
| S10_vs_74216  full        | 1658  | No  | NA | 0    | 2  | Not-determined | Genome-fragment | NA    | 0     |
| S9_extracted_k141_81731   | 3512  | No  | NA | 7    | 0  | Low-quality    | Genome-fragment | 11.58 | 0     |
| S10_vs_74463  full        | 1324  | No  | NA | 0    | 0  | Not-determined | Genome-fragment | NA    | 0     |
| S3_vs_k141_17932  full    | 3514  | No  | NA | 3    | 0  | Low-quality    | Genome-fragment | 7.56  | 0     |
| S5_vs_k141_102039  full   | 3514  | No  | NA | 0    | 0  | Low-quality    | Genome-fragment | 2.5   | 0     |
| S10_vs_74899  full        | 2157  | No  | NA | 0    | 0  | Not-determined | Genome-fragment | NA    | 0     |
| S10_vs_75035  full        | 9003  | No  | NA | 0    | 2  | Not-determined | Genome-fragment | NA    | 0     |
| S10_vs_75163  full        | 5536  | No  | NA | 0    | 1  | Not-determined | Genome-fragment | NA    | 0     |
| S12_vs_k141_79219  full   | 3514  | No  | NA | 2    | 0  | Low-quality    | Genome-fragment | 5.95  | 0     |
| S5_vs_k141_10868  full    | 3515  | No  | NA | 4    | 0  | Low-quality    | Genome-fragment | 5.68  | 0     |
| S7_vs_94334  full         | 3515  | Yes |    | 2    | 1  | Low-quality    | Genome-fragment | 4.07  | 29.02 |
| S4_extracted_952          | 3515  | No  | NA | 0    | 0  | Low-quality    | Genome-fragment | 4     | 0     |
| S10_vs_75682  full        | 2436  | No  | NA | 0    | 1  | Not-determined | Genome-fragment | NA    | 0     |
| S10_vs_75757  full        | 3725  | No  | NA | 0    | 4  | Not-determined | Genome-fragment | NA    | 0     |
| S1_vs_k141_42188  full    | 3516  | No  | NA | 1    | 0  | Low-quality    | Genome-fragment | 1.91  | 0     |
| S10_vs_75931  full        | 1443  | No  | NA | 0    | 0  | Not-determined | Genome-fragment | NA    | 0     |
| S10_vs_75935  full        | 2218  | No  | NA | 0    | 1  | Not-determined | Genome-fragment | NA    | 0     |
| S10_vs_75970  full        | 1531  | No  | NA | 0    | 0  | Not-determined | Genome-fragment | NA    | 0     |
| S7_vs_20911  full         | 3518  | No  | NA | 0    | 3  | Low-quality    | Genome-fragment | 1.64  | 0     |
| S16_vs_161763  full       | 3518  | No  | NA | 0    | 2  | Low-quality    | Genome-fragment | 3.55  | 0     |
| S10_vs_76048  full        | 1266  | No  | NA | 0    | 0  | Not-determined | Genome-fragment | NA    | 0     |
| S10_vs_76211  full        | 2629  | No  | NA | 0    | 1  | Not-determined | Genome-fragment | NA    | 0     |
| S11_vs_k141_92463  full   | 3519  | No  | NA | 0    | 0  | Low-quality    | Genome-fragment | 5.83  | 0     |
| S16_extracted_145160      | 3519  | No  | NA | 0    | 0  | Low-quality    | Genome-fragment | 8.42  | 0     |
| S9_vs_k141_68658  full    | 3520  | No  | NA | 4    | 0  | Low-quality    | Genome-fragment | 8     | 0     |
| S13_vs_47059  full        | 3520  | Yes |    | 1    | 3  | Low-quality    | Genome-fragment | 0.61  | 67.93 |
| S7_extracted_74678        | 3520  | No  | NA | 0    | 2  | Low-quality    | Genome-fragment | 2.1   | 0     |
| S10_vs_76660  full        | 3617  | No  | NA | 0    | 1  | Not-determined | Genome-fragment | NA    | 0     |
| S10_vs_76664  full        | 2041  | No  | NA | 0    | 3  | Not-determined | Genome-fragment | NA    | 0     |
| S5_extracted_k141_20685   | 3521  | No  | NA | 0    | 2  | Low-quality    | Genome-fragment | 1.59  | 0     |
| S10_vs_76854  full        | 2295  | No  | NA | 0    | 3  | Not-determined | Genome-fragment | NA    | 0     |
| S5_vs_k141_116062  full   | 3521  | No  | NA | 2210 | 1  | Low-quality    | Genome-fragment | 4.68  | 37.23 |
| S10_vs_77004  full        | 56621 | No  | NA | 16   | 1  | High-quality   | Genome-fragment | 97.19 | 0     |
| S11_vs_k141_62458  full   | 3522  | No  | NA | 2    | 0  | Low-quality    | Genome-fragment | 9.4   | 0     |
| S10_vs_77228  full        | 6978  | No  | NA | 0    | 5  | Not-determined | Genome-fragment | NA    | 0     |
| S5_vs_k141_46797  full    | 3522  | No  | NA | 0    | 0  | Low-quality    | Genome-fragment | 5.27  | 0     |
| S10_vs_77403  full        | 2233  | No  | NA | 0    | 1  | Not-determined | Genome-fragment | NA    | 0     |
| S10_vs_77554  full        | 1986  | No  | NA | 0    | 3  | Not-determined | Genome-fragment | NA    | 0     |
| S10_vs_77656  full        | 2366  | No  | NA | 0    | 1  | Not-determined | Genome-fragment | NA    | 0     |
| S12_vs_k141_137132  full  | 3522  | No  | NA | 0    | 0  | Low-quality    | Genome-fragment | 6.26  | 0     |
| S6_extracted_k141_8128    | 3522  | No  | NA | 0    | 1  | Low-quality    | Genome-fragment | 3.21  | 0     |
| S6_vs_k141_3522  full     | 3522  | No  | NA | 0    | 0  | Low-quality    | Genome-fragment | 6     | 0     |
| S10_vs_77969  full        | 3152  | No  | NA | 0    | 0  | Not-determined | Genome-fragment | NA    | 0     |
| S10_vs_78080  full        | 2029  | No  | NA | 0    | 1  | Not-determined | Genome-fragment | NA    | 0     |
| S10_vs_78099  full        | 14912 | No  | NA | 0    | 2  | Not-determined | Genome-fragment | NA    | 0     |
| S10_vs_78217  full        | 3567  | No  | NA | 0    | 3  | Not-determined | Genome-fragment | NA    | 0     |
| S17_extracted_k141_68541  | 3524  | No  | NA | 1    | 0  | Low-quality    | Genome-fragment | 3.22  | 0     |
| S17_vs_k141_175357  full  | 3524  | Yes |    | 1    | 2  | Low-quality    | Genome-fragment | 0.65  | 36.92 |
| S10_vs_78409  full        | 1920  | No  | NA | 0    | 0  | Not-determined | Genome-fragment | NA    | 0     |
| S10_vs_78539  full        | 3833  | No  | NA | 0    | 3  | Not-determined | Genome-fragment | NA    | 0     |
| S10_vs_78565  full        | 1903  | No  | NA | 0    | 1  | Not-determined | Genome-fragment | NA    | 0     |
| S11_vs_k141_13548  full   | 3524  | No  | NA | 1    | 0  | Low-quality    | Genome-fragment | 2.67  | 0     |
| S10_vs_78657  full        | 2658  | No  | NA | 0    | 3  | Not-determined | Genome-fragment | NA    | 0     |
| S10_vs_44590  full        | 3524  | No  | NA | 0    | 1  | Low-quality    | Genome-fragment | 5.55  | 0     |
| S4_extracted_6662         | 3524  | No  | NA | 0    | 0  | Low-quality    | Genome-fragment | 3.75  | 0     |
| S13_extracted_111355      | 3525  | No  | NA | 0    | 3  | Low-quality    | Genome-fragment | 1.61  | 0     |
| S10_vs_79237  full        | 3470  | No  | NA | 0    | 4  | Not-determined | Genome-fragment | NA    | 0     |
| S14_vs_k141_90506  full   | 3525  | No  | NA | 2    | 0  | Low-quality    | Genome-fragment | 5.12  | 0     |
| S10_vs_79413  full        | 1113  | No  | NA | 0    | 0  | Not-determined | Genome-fragment | NA    | 0     |
| S10_vs_79518  full        | 2518  | No  | NA | 0    | 1  | Not-determined | Genome-fragment | NA    | 0     |
| S14_vs_k141_47256  full   | 3525  | No  | NA | 5    | 0  | Low-quality    | Genome-fragment | 7.52  | 0     |
| S7_vs_91020  full         | 3525  | No  | NA | 0    | 1  | Low-quality    | Genome-fragment | 1.77  | 0     |
| S9_vs_k141_76046  full    | 3526  | No  | NA | 0    | 1  | Low-quality    |                 |       |       |



|                           |       |    |    |   |                |                 |                 |       |       |
|---------------------------|-------|----|----|---|----------------|-----------------|-----------------|-------|-------|
| S16_v4_44833  full        | 3529  | No | NA | 0 | 1              | Low-quality     | Genome-fragment | 7.09  | 0     |
| S10_v4_1562  full         | 3415  | No | NA | 2 | Not-determined | Genome-fragment | NA              | 0     | 0     |
| S8_v4_k141_113739  full   | 3529  | No | NA | 3 | 0              | Low-quality     | Genome-fragment | 9.25  | 0     |
| S10_v4_81614  full        | 4319  | No | NA | 0 | 1              | Not-determined  | Genome-fragment | NA    | 0     |
| S12_v4_k141_172315  full  | 3530  | No | NA | 5 | 0              | Low-quality     | Genome-fragment | 7.34  | 0     |
| S5_extracted_k141_61223   | 3512  | No | NA | 3 | 0              | Low-quality     | Genome-fragment | 9.93  | 0     |
| S10_v4_81933  full        | 1906  | No | NA | 0 | 0              | Not-determined  | Genome-fragment | NA    | 0     |
| S10_v4_82011  full        | 3528  | No | NA | 0 | 0              | Not-determined  | Genome-fragment | NA    | 0     |
| S10_v4_57366  full        | 3512  | No | NA | 0 | 0              | Low-quality     | Genome-fragment | 7.59  | 0     |
| S10_v4_82119  full        | 1205  | No | NA | 0 | 2              | Not-determined  | Genome-fragment | NA    | 0     |
| S10_v4_82208  full        | 1877  | No | NA | 0 | 2              | Not-determined  | Genome-fragment | NA    | 0     |
| S10_v4_82232  full        | 1278  | No | NA | 0 | 2              | Not-determined  | Genome-fragment | NA    | 0     |
| S1_v4_k141_119857  full   | 3533  | No | NA | 0 | 0              | Low-quality     | Genome-fragment | 7.61  | 0     |
| S10_v4_41130  full        | 3533  | No | NA | 0 | 3              | Low-quality     | Genome-fragment | 1.7   | 0     |
| S17_v4_k141_62365  full   | 3534  | No | NA | 0 | 0              | Low-quality     | Genome-fragment | 6.53  | 0     |
| S7_v4_37373  full         | 3514  | No | NA | 1 | 0              | Low-quality     | Genome-fragment | 9.44  | 0     |
| S10_v4_82418  full        | 1611  | No | NA | 0 | 2              | Not-determined  | Genome-fragment | NA    | 0     |
| S10_v4_82512  full        | 1901  | No | NA | 0 | 1              | Not-determined  | Genome-fragment | NA    | 0     |
| S10_v4_82571  full        | 4126  | No | NA | 0 | 2              | Not-determined  | Genome-fragment | NA    | 0     |
| S10_v4_82667  full        | 2884  | No | NA | 0 | 1              | Not-determined  | Genome-fragment | NA    | 0     |
| S10_v4_82963  full        | 1827  | No | NA | 0 | 2              | Not-determined  | Genome-fragment | NA    | 0     |
| S11_v4_k141_120951  full  | 3535  | No | NA | 1 | 0              | Low-quality     | Genome-fragment | 7.45  | 0     |
| S10_v4_83040  full        | 4644  | No | NA | 0 | 1              | Not-determined  | Genome-fragment | NA    | 0     |
| S10_v4_83052  full        | 3536  | No | NA | 0 | 4              | Not-determined  | Genome-fragment | NA    | 0     |
| S5_v4_k141_25165  full    | 3535  | No | NA | 0 | 2              | Low-quality     | Genome-fragment | 2.58  | 0     |
| S10_v4_83289  full        | 1768  | No | NA | 0 | 2              | Not-determined  | Genome-fragment | NA    | 0     |
| S10_v4_83342  full        | 2645  | No | NA | 0 | 2              | Not-determined  | Genome-fragment | NA    | 0     |
| S10_v4_83366  full        | 2208  | No | NA | 0 | 2              | Not-determined  | Genome-fragment | NA    | 0     |
| S10_v4_83462  full        | 2099  | No | NA | 2 | Not-determined | Genome-fragment | NA              | 0     | 0     |
| S7_v4_115285  full        | 3535  | No | NA | 4 | 0              | Low-quality     | Genome-fragment | 9.15  | 0     |
| S11_v4_k141_63390  full   | 3536  | No | NA | 0 | 0              | Low-quality     | Genome-fragment | 8.96  | 0     |
| S10_v4_110709  full       | 3536  | No | NA | 0 | 0              | Low-quality     | Genome-fragment | 6.8   | 0     |
| S17_v4_k141_163064  full  | 3538  | No | NA | 1 | 0              | Low-quality     | Genome-fragment | 9.95  | 0     |
| S10_v4_83748  full        | 1459  | No | NA | 0 | 0              | Not-determined  | Genome-fragment | NA    | 0     |
| S10_v4_83796  full        | 3539  | No | NA | 0 | 2              | Not-determined  | Genome-fragment | NA    | 0     |
| S7_v4_31391  full         | 3538  | No | NA | 0 | 1              | Low-quality     | Genome-fragment | 9.59  | 0     |
| S16_extracted_55934       | 3539  | No | NA | 0 | 1              | Low-quality     | Genome-fragment | 5.82  | 0     |
| S10_v4_83918  full        | 1691  | No | NA | 0 | 0              | Not-determined  | Genome-fragment | NA    | 0     |
| S9_extracted_k141_38540   | 3540  | No | NA | 0 | 0              | Low-quality     | Genome-fragment | 5.9   | 0     |
| S10_v4_84051  full        | 2209  | No | NA | 0 | 2              | Not-determined  | Genome-fragment | NA    | 0     |
| S10_v4_84124  full        | 2746  | No | NA | 0 | 2              | Not-determined  | Genome-fragment | NA    | 0     |
| S10_v4_84150  full        | 2946  | No | NA | 0 | 6              | Not-determined  | Genome-fragment | NA    | 0     |
| S7_v4_85186  full         | 3540  | No | NA | 0 | 3              | Low-quality     | Genome-fragment | 4.49  | 0     |
| S10_extracted_15854       | 3540  | No | NA | 2 | 0              | Low-quality     | Genome-fragment | 8.86  | 0     |
| S10_v4_84686  full        | 2211  | No | NA | 0 | 0              | Not-determined  | Genome-fragment | NA    | 0     |
| S8_v4_k141_141645  full   | 3540  | No | NA | 0 | 0              | Low-quality     | Genome-fragment | 5.52  | 0     |
| S10_v4_84694  full        | 1999  | No | NA | 0 | 2              | Not-determined  | Genome-fragment | NA    | 0     |
| S10_v4_84713  full        | 1765  | No | NA | 0 | 1              | Not-determined  | Genome-fragment | NA    | 0     |
| S8_v4_k141_25709  full    | 3540  | No | NA | 0 | 1              | Low-quality     | Genome-fragment | 5.45  | 0     |
| S10_v4_85083  full        | 2217  | No | NA | 0 | 2              | Not-determined  | Genome-fragment | NA    | 0     |
| S10_v4_85088  full        | 1903  | No | NA | 0 | 1              | Not-determined  | Genome-fragment | NA    | 0     |
| S10_v4_85090  full        | 2082  | No | NA | 0 | 0              | Not-determined  | Genome-fragment | NA    | 0     |
| S10_v4_85347  full        | 1389  | No | NA | 0 | 0              | Not-determined  | Genome-fragment | NA    | 0     |
| S14_extracted_k141_106915 | 3541  | No | NA | 1 | 0              | Low-quality     | Genome-fragment | 1.41  | 0     |
| S10_v4_85387  full        | 1456  | No | NA | 6 | 2              | Not-determined  | Genome-fragment | NA    | 0     |
| S1_v4_k141_129598  full   | 3541  | No | NA | 0 | 0              | Low-quality     | Genome-fragment | 9.76  | 0     |
| S7_v4_48803  full         | 3541  | No | NA | 0 | 1              | Low-quality     | Genome-fragment | 6.02  | 0     |
| S10_v4_85907  full        | 3541  | No | NA | 0 | 0              | Low-quality     | Genome-fragment | 6.58  | 0     |
| S10_v4_85768  full        | 2739  | No | NA | 0 | 1              | Not-determined  | Genome-fragment | NA    | 0     |
| S10_v4_85782  full        | 2026  | No | NA | 0 | 1              | Not-determined  | Genome-fragment | NA    | 0     |
| S3_v4_k141_24222  full    | 3542  | No | NA | 0 | 0              | Low-quality     | Genome-fragment | 2.33  | 0     |
| S10_v4_85834  full        | 1106  | No | NA | 0 | 0              | Not-determined  | Genome-fragment | NA    | 0     |
| S5_v4_k141_91652  full    | 3542  | No | NA | 0 | 0              | Low-quality     | Genome-fragment | 7.96  | 0     |
| S7_v4_37218  full         | 3542  | No | NA | 0 | 1              | Low-quality     | Genome-fragment | 5.61  | 0     |
| S17_v4_k141_83124  full   | 3544  | No | NA | 0 | 0              | Low-quality     | Genome-fragment | 6.09  | 0     |
| S7_extracted_121224       | 3544  | No | NA | 0 | 0              | Low-quality     | Genome-fragment | 3.62  | 0     |
| S17_extracted_k141_102816 | 3545  | No | NA | 2 | 0              | Low-quality     | Genome-fragment | 16.24 | 0     |
| S14_v4_k141_16710  full   | 3545  | No | NA | 3 | 0              | Low-quality     | Genome-fragment | 7.91  | 0     |
| S14_v4_k141_63959  full   | 3545  | No | NA | 0 | 0              | Low-quality     | Genome-fragment | 7.05  | 0     |
| S10_v4_86300  full        | 2148  | No | NA | 0 | 1              | Not-determined  | Genome-fragment | NA    | 0     |
| S10_v4_86458  full        | 2013  | No | NA | 0 | 3              | Not-determined  | Genome-fragment | NA    | 0     |
| S10_v4_86604  full        | 1107  | No | NA | 1 | Not-determined | Genome-fragment | NA              | 0     | 0     |
| S10_v4_86673  full        | 3029  | No | NA | 0 | 4              | Not-determined  | Genome-fragment | NA    | 0     |
| S10_v4_86711  full        | 1652  | No | NA | 0 | 1              | Not-determined  | Genome-fragment | NA    | 0     |
| S1_v4_k141_93743  full    | 3546  | No | NA | 2 | 0              | Low-quality     | Genome-fragment | 10.37 | 0     |
| S10_v4_86745  full        | 2016  | No | NA | 0 | 0              | Not-determined  | Genome-fragment | NA    | 0     |
| S10_v4_86852  full        | 5751  | No | NA | 0 | 5              | Not-determined  | Genome-fragment | NA    | 0     |
| S10_v4_86864  full        | 5274  | No | NA | 0 | 3              | Not-determined  | Genome-fragment | NA    | 0     |
| S7_v4_16131  full         | 3546  | No | NA | 0 | 0              | Low-quality     | Genome-fragment | 7.49  | 0     |
| S10_v4_87051  full        | 1195  | No | NA | 0 | 1              | Not-determined  | Genome-fragment | NA    | 0     |
| S10_v4_87162  full        | 4294  | No | NA | 0 | 3              | Not-determined  | Genome-fragment | NA    | 0     |
| S10_v4_87250  full        | 1488  | No | NA | 0 | 1              | Not-determined  | Genome-fragment | NA    | 0     |
| S16_v4_104423  full       | 3546  | No | NA | 0 | 1              | Low-quality     | Genome-fragment | 6.81  | 0     |
| S10_v4_87378  full        | 3714  | No | NA | 0 | 2              | Not-determined  | Genome-fragment | NA    | 0     |
| S10_v4_87561  full        | 2230  | No | NA | 0 | 1              | Not-determined  | Genome-fragment | NA    | 0     |
| S10_v4_87600  full        | 2282  | No | NA | 0 | 3              | Not-determined  | Genome-fragment | NA    | 0     |
| S10_extracted_38796       | 3546  | No | NA | 0 | 0              | Low-quality     | Genome-fragment | 7.35  | 0     |
| S10_v4_87857  full        | 1591  | No | NA | 0 | 0              | Not-determined  | Genome-fragment | NA    | 0     |
| S8_extracted_k141_159406  | 3546  | No | NA | 0 | 0              | Low-quality     | Genome-fragment | NA    | 0     |
| S10_v4_87933  full        | 3182  | No | NA | 0 | 1              | Not-determined  | Genome-fragment | NA    | 0     |
| S5_extracted_k141_138857  | 3547  | No | NA | 4 | 0              | Low-quality     | Genome-fragment | 7.34  | 0     |
| S1_v4_k141_96955  full    | 3548  | No | NA | 4 | 0              | Low-quality     | Genome-fragment | 2.32  | 0     |
| S1_v4_k141_62356  full    | 3548  | No | NA | 4 | 0              | Low-quality     | Genome-fragment | 6.59  | 0     |
| S10_v4_88102  full        | 1789  | No | NA | 0 | 1              | Not-determined  | Genome-fragment | NA    | 0     |
| S3_extracted_k141_42121   | 3548  | No | NA | 0 | 1              | Low-quality     | Genome-fragment | 5.82  | 0     |
| S10_v4_88397  full        | 20563 | No | NA | 0 | 2              | Not-determined  | Genome-fragment | NA    | 0     |
| S10_v4_88484  full        | 1582  | No | NA | 0 | 0              | Not-determined  | Genome-fragment | NA    | 0     |
| S10_v4_88546  full        | 1441  | No | NA | 0 | 1              | Not-determined  | Genome-fragment | NA    | 0     |
| S5_v4_k141_1327  full     | 3548  | No | NA | 0 | 0              | Low-quality     | Genome-fragment | 4.36  | 0     |
| S10_v4_88872  full        | 1177  | No | NA | 0 | 2              | Not-determined  | Genome-fragment | NA    | 0     |
| S10_v4_89108  full        | 4614  | No | NA | 0 | 3              | Not-determined  | Genome-fragment | NA    | 0     |
| S14_v4_k141_40531  full   | 3549  | No | NA | 0 | 1              | Low-quality     | Genome-fragment | 5.99  | 0     |
| S1_v4_k141_24729  full    | 3549  | No | NA | 3 | 0              | Low-quality     | Genome-fragment | 8.52  | 0     |
| S10_v4_89399  full        | 2580  | No | NA | 0 | 0              | Not-determined  | Genome-fragment | NA    | 0     |
| S10_v4_89462  full        | 1663  | No | NA | 0 | 1              | Not-determined  | Genome-fragment | NA    | 0     |
| S16_extracted_57565       | 3550  | No | NA | 0 | 0              | Low-quality     | Genome-fragment | 3.88  | 0     |
| S11_v4_k141_84792  full   | 3551  | No | NA | 1 | 0              | Low-quality     | Genome-fragment | 3.13  | 0     |
| S14_extracted_k141_75344  | 3551  | No | NA | 0 | 0              | Low-quality     | Genome-fragment | 5.57  | 0     |
| S10_v4_89600  full        | 1347  | No | NA | 0 | 1              | Not-determined  | Genome-fragment | NA    | 0     |
| S16_v4_148675  full       | 3551  | No | NA | 1 | 0              | Low-quality     | Genome-fragment | 3.01  | 0     |
| S10_v4_89797  full        | 6481  | No | NA | 0 | 3              | Not-determined  | Genome-fragment | NA    | 0     |
| S10_extracted_106193      | 3551  | No | NA | 0 | 0              | Low-quality     | Genome-fragment | 2.11  | 0     |
| S12_v4_k141_99415  full   | 3551  | No | NA | 3 | 0              | Low-quality     | Genome-fragment | 8.22  | 0     |
| S10_v4_90084  full        | 8071  | No | NA | 0 | 6              | Not-determined  | Genome-fragment | NA    | 0     |
| S10_v4_90209  full        | 12343 | No | NA | 0 | 9              | Not-determined  | Genome-fragment | NA    | 0     |
| S10_v4_90264  full        | 6927  | No | NA | 0 | 2              | Not-determined  | Genome-fragment | NA    | 0     |
| S8_extracted_k141_174518  | 3551  | No | NA | 0 | 1              | Low-quality     | Genome-fragment | 0.31  | 0     |
| S10_v4_90365  full        | 4926  | No | NA | 0 | 1              | Not-determined  | Genome-fragment | NA    | 0     |
| S10_v4_90452  full        | 4404  | No | NA | 0 | 1              | Not-determined  | Genome-fragment | NA    | 0     |
| S10_v4_90497  full        | 3746  | No | NA | 0 | 3              | Not-determined  | Genome-fragment | NA    | 0     |
| S9_v4_k141_42276  full    | 3552  | No | NA | 0 | 0              | Low-quality     | Genome-fragment | 2.04  | 0     |
| S10_v4_90707  full        | 4748  | No | NA | 0 | 4              | Not-determined  | Genome-fragment | NA    | 0     |
| S5_extracted_k141_99370   | 3552  | No | NA | 2 | 0              | Low-quality     | Genome-fragment | 2.17  | 0     |
| S10_v4_91346  full        | 3286  | No | NA | 0 | 3              | Not-determined  | Genome-fragment | NA    | 0     |
| S8_extracted_k141_139525  | 3552  | No | NA | 0 | 1              | Low-quality     | Genome-fragment | 1.68  | 0     |
| S7_extracted_68404        | 3553  | No | NA | 0 | 0              | Low-quality     | Genome-fragment | 5.6   | 0     |
| S7_extracted_k141_39576   | 3554  | No | NA | 0 | 1              | Low-quality     | Genome-fragment | 2.03  | 0     |
| S7_extracted_18164        | 3554  | No | NA | 0 | 0              | Low-quality     | Genome-fragment | 7.19  | 0     |
| S8_v4_k141_164500  full   | 3554  | No | NA | 0 | 3              | Low-quality     | Genome-fragment | 1.7   | 0     |
| S9_extracted_k141_20591   | 3555  | No | NA | 0 | 1              | Low-quality     | Genome-fragment | 8.24  | 0     |
| S16_v4_90277  full        | 3555  | No | NA | 2 | 1              | Low-quality     | Genome-fragment | 5.47  | 42.28 |
| S8_extracted_k141_138611  | 3555  | No | NA | 0 | 0              | Low-quality     | Genome-fragment | 2.52  | 0     |
| S11_v4_k141_11326  full   | 3556  | No | NA | 0 | 0              | Low-quality     | Genome-fragment | 8.62  | 0     |
| S10_v4_92351  full        | 2142  | No | NA | 0 | 2              | Not-determined  | Genome-fragment | NA    | 0     |
| S16_v4_77186  full        | 3556  | No | NA | 1 | 2              | Low-quality     | Genome-fragment | 1.57  | 0     |
| S16_v4_165124  full       | 3556  | No | NA | 0 | 1              | Low-quality     | Genome-fragment | 1.47  | 0     |
| S5_extracted_k141_63767   | 3557  | No | NA | 0 | 0              | Low-quality     | Genome-fragment | 12.21 | 0     |
| S10_v4_92770  full        | 2346  | No | NA | 0 | 2              | Not-determined  | Genome-fragment | NA    | 0     |
| S5_extracted_k141_21354   | 3558  | No | NA | 0 | 0              | Low-quality     | Genome-fragment | 5.9   | 0     |
| S5_v4_k141_3883  full     | 3558  | No | NA | 2 | 0              | Low-quality     | Genome-fragment | 9.68  | 0     |
| S10_v4_93084  full        | 1684  | No | NA | 0 | 0              | Not-determined  | Genome-fragment | NA    | 0     |
| S16_v4_97271  full        | 3558  | No | NA | 0 | 0              | Low-quality     | Genome-fragment | 9.48  | 0     |
| S10_v4_93431  full        | 9656  | No | NA | 0 | 4              | Not-determined  | Genome-fragment | NA    | 0     |
| S10_v4_93479  full        | 2285  | No | NA | 0 | 0              | Not-determined  | Genome-fragment | NA    | 0     |
| S10_v4_93578  full        | 3018  | No | NA | 0 | 4              | Not-determined  | Genome-fragment | NA    | 0     |
| S10_v4_93603  full        | 2083  | No | NA | 0 | 2              | Not-determined  | Genome-fragment | NA</  |       |



|                           |       |     |      |    |   |                |                 |    |       |       |
|---------------------------|-------|-----|------|----|---|----------------|-----------------|----|-------|-------|
| S10_vs_96462  full        | 1289  | No  | NA   | 0  | 2 | Not-determined | Genome-fragment | NA | 0     | 0     |
| S10_extracted_32418       | 3563  | No  | NA   | 1  | 0 | Low-quality    | Genome-fragment | NA | 9.13  | 0     |
| S10_vs_80447  full        | 3563  | No  | NA   | 0  | 1 | Low-quality    | Genome-fragment | NA | 8.32  | 0     |
| S10_vs_96678  full        | 1869  | No  | NA   | 0  | 1 | Not-determined | Genome-fragment | NA | 0     | 0     |
| S10_vs_96773  full        | 1517  | No  | NA   | 0  | 2 | Not-determined | Genome-fragment | NA | 0     | 0     |
| S3_vs_k141_81859  full    | 3564  | No  | NA   | 1  | 0 | Low-quality    | Genome-fragment | NA | 3.72  | 0     |
| S10_vs_96824  full        | 1046  | No  | NA   | 0  | 0 | Not-determined | Genome-fragment | NA | 0     | 0     |
| S17_vs_k141_175826  full  | 3565  | No  | NA   | 0  | 3 | Low-quality    | Genome-fragment | NA | 2.05  | 0     |
| S10_vs_97143  full        | 1394  | No  | NA   | 0  | 1 | Not-determined | Genome-fragment | NA | 0     | 0     |
| S16_extracted_172330      | 3565  | No  | NA   | 3  | 0 | Low-quality    | Genome-fragment | NA | 3.7   | 0     |
| S10_vs_97320  full        | 1810  | No  | NA   | 0  | 1 | Not-determined | Genome-fragment | NA | 0     | 0     |
| S10_vs_97366  full        | 3445  | No  | NA   | 0  | 1 | Not-determined | Genome-fragment | NA | 0     | 0     |
| S10_vs_97420  full        | 1819  | No  | NA   | 0  | 1 | Not-determined | Genome-fragment | NA | 0     | 0     |
| S10_vs_97425  full        | 1760  | No  | NA   | 0  | 1 | Not-determined | Genome-fragment | NA | 0     | 0     |
| S10_vs_97712  full        | 1584  | No  | NA   | 0  | 1 | Not-determined | Genome-fragment | NA | 0     | 0     |
| S13_extracted_84499       | 3566  | No  | NA   | 3  | 0 | Low-quality    | Genome-fragment | NA | 1.43  | 0     |
| S10_vs_97823  full        | 2610  | No  | NA   | 0  | 1 | Not-determined | Genome-fragment | NA | 0     | 0     |
| S10_vs_97996  full        | 2413  | No  | NA   | 0  | 0 | Not-determined | Genome-fragment | NA | 0     | 0     |
| S10_vs_98006  full        | 2655  | No  | NA   | 0  | 0 | Not-determined | Genome-fragment | NA | 0     | 0     |
| S10_vs_98317  full        | 1550  | No  | NA   | 0  | 2 | Not-determined | Genome-fragment | NA | 0     | 0     |
| S10_vs_98325  full        | 1171  | No  | NA   | 0  | 1 | Not-determined | Genome-fragment | NA | 0     | 0     |
| S10_vs_98340  full        | 3566  | No  | NA   | 0  | 2 | Not-determined | Genome-fragment | NA | 0     | 0     |
| S10_vs_98407  full        | 2396  | No  | NA   | 0  | 2 | Not-determined | Genome-fragment | NA | 0     | 0     |
| S5_extracted_k141_40839   | 3566  | No  | NA   | 1  | 0 | Low-quality    | Genome-fragment | NA | 2.28  | 0     |
| S10_vs_98627  full        | 5110  | No  | NA   | 0  | 2 | Not-determined | Genome-fragment | NA | 5.94  | 0     |
| S3_vs_k141_1557  full     | 3567  | No  | NA   | 3  | 0 | Low-quality    | Genome-fragment | NA | 5.94  | 0     |
| S8_vs_k141_11928  full    | 3567  | No  | NA   | 0  | 0 | Low-quality    | Genome-fragment | NA | 7.01  | 0     |
| S10_vs_98905  full        | 3529  | No  | NA   | 0  | 2 | Not-determined | Genome-fragment | NA | 0     | 0     |
| S7_vs_52091  full         | 3568  | Yes | 666  | 1  | 1 | Low-quality    | Genome-fragment | NA | 1.14  | 81.33 |
| S10_vs_98959  full        | 5448  | No  | NA   | 0  | 3 | Not-determined | Genome-fragment | NA | 0     | 0     |
| S10_vs_99163  full        | 3066  | No  | NA   | 0  | 3 | Not-determined | Genome-fragment | NA | 0     | 0     |
| S10_vs_99193  full        | 2151  | No  | NA   | 0  | 3 | Not-determined | Genome-fragment | NA | 0     | 0     |
| S10_vs_99208  full        | 2257  | No  | NA   | 0  | 7 | Not-determined | Genome-fragment | NA | 0     | 0     |
| S10_vs_99250  full        | 4846  | No  | NA   | 0  | 4 | Not-determined | Genome-fragment | NA | 0     | 0     |
| S10_vs_99307  full        | 1712  | No  | NA   | 0  | 2 | Not-determined | Genome-fragment | NA | 0     | 0     |
| S16_extracted_97679       | 3568  | No  | NA   | 0  | 0 | Low-quality    | Genome-fragment | NA | 6.71  | 0     |
| S10_vs_99482  full        | 1777  | No  | NA   | 0  | 1 | Not-determined | Genome-fragment | NA | 0     | 0     |
| S10_vs_99609  full        | 1196  | No  | NA   | 0  | 0 | Not-determined | Genome-fragment | NA | 0     | 0     |
| S12_vs_k141_137880  full  | 3568  | Yes | 2800 | 1  | 1 | Low-quality    | Genome-fragment | NA | 7.72  | 21.52 |
| S10_vs_99919  full        | 11506 | No  | NA   | 0  | 3 | Not-determined | Genome-fragment | NA | 0     | 0     |
| S10_vs_100090  full       | 2059  | No  | NA   | 0  | 0 | Not-determined | Genome-fragment | NA | 0     | 0     |
| S10_vs_100131  full       | 1923  | No  | NA   | 0  | 0 | Not-determined | Genome-fragment | NA | 0     | 0     |
| S10_vs_100313  full       | 7027  | No  | NA   | 0  | 3 | Not-determined | Genome-fragment | NA | 0     | 0     |
| S10_vs_100391  full       | 1947  | No  | NA   | 0  | 2 | Not-determined | Genome-fragment | NA | 0     | 0     |
| S16_extracted_5122        | 3569  | No  | NA   | 0  | 0 | Low-quality    | Genome-fragment | NA | 12.28 | 0     |
| S10_vs_100742  full       | 1516  | No  | NA   | 0  | 2 | Not-determined | Genome-fragment | NA | 0     | 0     |
| S16_extracted_135679      | 3569  | No  | NA   | 0  | 0 | Low-quality    | Genome-fragment | NA | 6.41  | 0     |
| S16_vs_99346  full        | 3569  | No  | NA   | 2  | 0 | Low-quality    | Genome-fragment | NA | 8.46  | 0     |
| S16_vs_172203  full       | 3569  | Yes | 1514 | 2  | 0 | Low-quality    | Genome-fragment | NA | 2.88  | 57.58 |
| S8_extracted_k141_146501  | 3569  | No  | NA   | 0  | 1 | Low-quality    | Genome-fragment | NA | 1.83  | 0     |
| S8_vs_k141_160745  full   | 3569  | No  | NA   | 0  | 4 | Low-quality    | Genome-fragment | NA | 1.77  | 0     |
| S10_vs_101479  full       | 1092  | No  | NA   | 0  | 0 | Not-determined | Genome-fragment | NA | 0     | 0     |
| S8_extracted_k141_45848   | 3570  | No  | NA   | 2  | 0 | Low-quality    | Genome-fragment | NA | 17.57 | 0     |
| S10_vs_101535  full       | 1560  | No  | NA   | 0  | 0 | Not-determined | Genome-fragment | NA | 0     | 0     |
| S8_vs_k141_179386  full   | 3570  | No  | NA   | 0  | 1 | Low-quality    | Genome-fragment | NA | 1.14  | 0     |
| S14_extracted_k141_81094  | 3571  | No  | NA   | 0  | 1 | Low-quality    | Genome-fragment | NA | 6.1   | 0     |
| S7_extracted_83194        | 3571  | No  | NA   | 2  | 0 | Low-quality    | Genome-fragment | NA | 7.82  | 0     |
| S10_vs_101749  full       | 1129  | No  | NA   | 0  | 0 | Not-determined | Genome-fragment | NA | 0     | 0     |
| S10_vs_101843  full       | 1588  | No  | NA   | 0  | 0 | Not-determined | Genome-fragment | NA | 0     | 0     |
| S12_extracted_k141_154497 | 3571  | No  | NA   | 1  | 0 | Low-quality    | Genome-fragment | NA | 2.06  | 0     |
| S16_vs_112197  full       | 3572  | No  | NA   | 0  | 1 | Low-quality    | Genome-fragment | NA | 1.02  | 0     |
| S10_vs_102127  full       | 1003  | No  | NA   | 0  | 0 | Not-determined | Genome-fragment | NA | 0     | 0     |
| S10_vs_102178  full       | 5772  | No  | NA   | 0  | 4 | Not-determined | Genome-fragment | NA | 0     | 0     |
| S10_vs_102253  full       | 1683  | No  | NA   | 0  | 1 | Not-determined | Genome-fragment | NA | 0     | 0     |
| S10_extracted_25425       | 3572  | No  | NA   | 0  | 1 | Low-quality    | Genome-fragment | NA | 1.64  | 0     |
| S10_vs_102339  full       | 2916  | No  | NA   | 0  | 2 | Not-determined | Genome-fragment | NA | 0     | 0     |
| S10_vs_102355  full       | 1761  | No  | NA   | 0  | 0 | Not-determined | Genome-fragment | NA | 0     | 0     |
| S10_vs_102388  full       | 1428  | No  | NA   | 0  | 1 | Not-determined | Genome-fragment | NA | 0     | 0     |
| S10_vs_102399  full       | 4545  | No  | NA   | 0  | 2 | Not-determined | Genome-fragment | NA | 0     | 0     |
| S10_vs_102447  full       | 2438  | No  | NA   | 0  | 1 | Not-determined | Genome-fragment | NA | 0     | 0     |
| S11_extracted_k141_98220  | 3573  | No  | NA   | 0  | 1 | Low-quality    | Genome-fragment | NA | 6.3   | 0     |
| S3_extracted_k141_116852  | 3573  | No  | NA   | 0  | 3 | Low-quality    | Genome-fragment | NA | 6.03  | 0     |
| S10_vs_102633  full       | 1436  | No  | NA   | 0  | 1 | Not-determined | Genome-fragment | NA | 0     | 0     |
| S7_vs_62603  full         | 3573  | No  | NA   | 2  | 0 | Low-quality    | Genome-fragment | NA | 2.37  | 0     |
| S10_vs_102745  full       | 2100  | No  | NA   | 1  | 1 | Not-determined | Genome-fragment | NA | 9.33  | 0     |
| S16_vs_168795  full       | 3574  | No  | NA   | 0  | 1 | Low-quality    | Genome-fragment | NA | 0     | 0     |
| S10_vs_102965  full       | 7822  | No  | NA   | 0  | 5 | Not-determined | Genome-fragment | NA | 0     | 0     |
| S8_vs_k141_15421  full    | 3574  | No  | NA   | 0  | 1 | Low-quality    | Genome-fragment | NA | 7.88  | 0     |
| S10_vs_103085  full       | 1301  | No  | NA   | 0  | 1 | Not-determined | Genome-fragment | NA | 0     | 0     |
| S3_extracted_k141_27079   | 3575  | No  | NA   | 0  | 0 | Low-quality    | Genome-fragment | NA | 1.97  | 0     |
| S10_vs_103266  full       | 1113  | No  | NA   | 0  | 1 | Not-determined | Genome-fragment | NA | 5.07  | 0     |
| S12_vs_k141_150751  full  | 3575  | No  | NA   | 0  | 2 | Low-quality    | Genome-fragment | NA | 10.34 | 0     |
| S7_extracted_133557       | 3576  | No  | NA   | 4  | 0 | Low-quality    | Genome-fragment | NA | 1.45  | 0     |
| S16_extracted_215012      | 3576  | No  | NA   | 0  | 2 | Low-quality    | Genome-fragment | NA | 0     | 0     |
| S10_vs_103561  full       | 2655  | No  | NA   | 0  | 2 | Not-determined | Genome-fragment | NA | 0     | 0     |
| S10_vs_103709  full       | 2703  | No  | NA   | 0  | 0 | Not-determined | Genome-fragment | NA | 0     | 0     |
| S12_extracted_k141_115064 | 3576  | No  | NA   | 0  | 5 | Low-quality    | Genome-fragment | NA | 2.37  | 0     |
| S4_extracted_13731        | 3576  | No  | NA   | 0  | 0 | Low-quality    | Genome-fragment | NA | 9.16  | 0     |
| S6_extracted_k141_13246   | 3576  | No  | NA   | 0  | 0 | Low-quality    | Genome-fragment | NA | 8.23  | 0     |
| S9_extracted_k141_47507   | 3577  | No  | NA   | 4  | 0 | Low-quality    | Genome-fragment | NA | 10.06 | 0     |
| S11_extracted_k141_52353  | 3577  | No  | NA   | 3  | 0 | Low-quality    | Genome-fragment | NA | 6.5   | 0     |
| S3_vs_k141_147701  full   | 3577  | No  | NA   | 0  | 0 | Low-quality    | Genome-fragment | NA | 6.24  | 0     |
| S7_extracted_24505        | 3577  | No  | NA   | 0  | 1 | Low-quality    | Genome-fragment | NA | 6.39  | 0     |
| S10_vs_96118  full        | 3577  | No  | NA   | 2  | 0 | Low-quality    | Genome-fragment | NA | 5.96  | 0     |
| S10_vs_104113  full       | 1256  | No  | NA   | 0  | 0 | Not-determined | Genome-fragment | NA | 0     | 0     |
| S11_extracted_k141_27321  | 3578  | No  | NA   | 0  | 3 | Low-quality    | Genome-fragment | NA | 1.64  | 0     |
| S17_extracted_k141_158069 | 3579  | No  | NA   | 0  | 3 | Low-quality    | Genome-fragment | NA | 3.12  | 0     |
| S10_vs_104245  full       | 6210  | No  | NA   | 0  | 3 | Not-determined | Genome-fragment | NA | 0     | 0     |
| S10_vs_104304  full       | 1444  | No  | NA   | 0  | 1 | Not-determined | Genome-fragment | NA | 0     | 0     |
| S10_vs_104342  full       | 5048  | No  | NA   | 0  | 4 | Not-determined | Genome-fragment | NA | 0     | 0     |
| S12_vs_k141_117185  full  | 3581  | No  | NA   | 0  | 2 | Low-quality    | Genome-fragment | NA | 1.66  | 0     |
| S8_extracted_k141_30490   | 3581  | No  | NA   | 0  | 0 | Not-determined | Genome-fragment | NA | 5.52  | 0     |
| S10_vs_104550  full       | 3100  | No  | NA   | 0  | 0 | Not-determined | Genome-fragment | NA | 0     | 0     |
| S3_extracted_k141_69422   | 3582  | No  | NA   | 0  | 1 | Low-quality    | Genome-fragment | NA | 7.61  | 0     |
| S1_vs_k141_155160  full   | 3583  | No  | NA   | 0  | 1 | Low-quality    | Genome-fragment | NA | 2.82  | 0     |
| S9_vs_k141_77141  full    | 3584  | Yes | 1961 | 1  | 1 | Low-quality    | Genome-fragment | NA | 1.42  | 45.28 |
| S10_vs_104909  full       | 6819  | No  | NA   | 0  | 4 | Not-determined | Genome-fragment | NA | 0     | 0     |
| S10_vs_104921  full       | 2037  | No  | NA   | 0  | 0 | Not-determined | Genome-fragment | NA | 0     | 0     |
| S3_vs_k141_80406  full    | 3584  | No  | NA   | 0  | 0 | Low-quality    | Genome-fragment | NA | 2.04  | 0     |
| S10_extracted_75543       | 3584  | No  | NA   | 0  | 0 | Low-quality    | Genome-fragment | NA | 3.64  | 0     |
| S8_extracted_k141_64354   | 3584  | No  | NA   | 0  | 1 | Low-quality    | Genome-fragment | NA | 0.99  | 0     |
| S10_vs_105164  full       | 9110  | No  | NA   | 0  | 5 | Not-determined | Genome-fragment | NA | 0     | 0     |
| S10_vs_105183  full       | 2591  | No  | NA   | 0  | 1 | Not-determined | Genome-fragment | NA | 0     | 0     |
| S16_extracted_19338       | 3585  | No  | NA   | 0  | 0 | Low-quality    | Genome-fragment | NA | 3.37  | 0     |
| S6_vs_k141_112171  full   | 3585  | No  | NA   | 2  | 0 | Low-quality    | Genome-fragment | NA | 3.01  | 0     |
| S10_vs_105399  full       | 3020  | No  | NA   | 0  | 4 | Not-determined | Genome-fragment | NA | 0     | 0     |
| S10_vs_105415  full       | 2505  | No  | NA   | 0  | 1 | Not-determined | Genome-fragment | NA | 0     | 0     |
| S10_vs_105547  full       | 6502  | No  | NA   | 0  | 3 | Not-determined | Genome-fragment | NA | 0     | 0     |
| S10_vs_105597  full       | 2611  | No  | NA   | 0  | 2 | Not-determined | Genome-fragment | NA | 0     | 0     |
| S10_vs_105832  full       | 2041  | No  | NA   | 0  | 3 | Not-determined | Genome-fragment | NA | 0     | 0     |
| S7_vs_43528  full         | 3586  | No  | NA   | 2  | 0 | Low-quality    | Genome-fragment | NA | 8.18  | 0     |
| S10_vs_106090  full       | 3169  | No  | NA   | 0  | 2 | Not-determined | Genome-fragment | NA | 0     | 0     |
| S10_vs_106107  full       | 1510  | No  | NA   | 0  | 2 | Not-determined | Genome-fragment | NA | 0     | 0     |
| S10_vs_106197  full       | 3439  | No  | NA   | 0  | 3 | Not-determined | Genome-fragment | NA | 0     | 0     |
| S12_extracted_k141_154528 | 3586  | No  | NA   | 0  | 1 | Low-quality    | Genome-fragment | NA | 0.32  | 0     |
| S1_extracted_k141_15457   | 3588  | No  | NA   | 2  | 0 | Low-quality    | Genome-fragment | NA | 7.54  | 0     |
| S10_vs_106373  full       | 4454  | No  | NA   | 0  | 0 | Not-determined | Genome-fragment | NA | 0     | 0     |
| S14_vs_k141_108745  full  | 3589  | No  | NA   | 2  | 0 | Low-quality    | Genome-fragment | NA | 12.53 | 0     |
| S12_vs_k141_120887  full  | 3589  | No  | NA   | 1  | 0 | Low-quality    | Genome-fragment | NA | 9.77  | 0     |
| S10_vs_106591  full       | 2342  | No  | NA   | 0  | 0 | Not-determined | Genome-fragment | NA | 2.03  | 0     |
| S1_vs_k141_149643  full   | 3590  | No  | NA   | 0  | 2 | Low-quality    | Genome-fragment | NA | 0.62  | 0     |
| S12_extracted_k141_185663 | 3590  | No  | NA   | 0  | 1 | Not-determined | Genome-fragment | NA | 0     | 0     |
| S10_vs_106690  full       | 2092  | No  | NA   | 0  | 1 | Not-determined | Genome-fragment | NA | 0     | 0     |
| S8_vs_k141_178125  full   | 3591  | No  | NA   | 1  | 0 | Low-quality    | Genome-fragment | NA | 6.16  | 0     |
| S17_vs_k141_152978  full  | 3592  | No  | NA   | 0  | 2 | Low-quality    | Genome-fragment | NA | 3.01  | 0     |
| S10_vs_106825  full       | 4988  | No  | NA   | 0  | 2 | Not-determined | Genome-fragment | NA | 0     | 0     |
| S10_vs_106834  full       | 31000 | No  | NA   | 12 | 2 | Medium-quality |                 |    |       |       |



|                           |       |     |      |    |                |                 |                 |       |       |
|---------------------------|-------|-----|------|----|----------------|-----------------|-----------------|-------|-------|
| S16_vs_1171451 full       | 3601  | No  | NA   | 0  | 2              | Low-quality     | Genome-fragment | 4.85  | 0     |
| S10_vs_1096861 full       | NA    | NA  | NA   | 0  | 4              | Not-determined  | Genome-fragment | NA    | 0     |
| S10_vs_1097311 full       | 2410  | No  | NA   | 0  | 2              | Not-determined  | Genome-fragment | NA    | 0     |
| S12_vs_k141_244231 full   | 3601  | Yes | 1504 | 1  | 1              | Low-quality     | Genome-fragment | 2.14  | 58.23 |
| S10_vs_1097731 full       | 1895  | No  | NA   | 0  | 0              | Not-determined  | Genome-fragment | NA    | 0     |
| S10_vs_1098671 full       | 2513  | No  | NA   | 0  | 0              | Not-determined  | Genome-fragment | NA    | 0     |
| S8_vs_k141_1369351 full   | 3601  | No  | NA   | 0  | 2              | Low-quality     | Genome-fragment | 6.49  | 0     |
| S10_vs_1100991 full       | 1812  | No  | NA   | 0  | 1              | Not-determined  | Genome-fragment | NA    | 0     |
| S14_vs_k141_5365511 full  | 3602  | No  | NA   | 0  | 0              | Low-quality     | Genome-fragment | 8.93  | 0     |
| S10_vs_1101671 full       | 6130  | No  | NA   | 0  | 3              | Not-determined  | Genome-fragment | NA    | 0     |
| S17_vs_k141_509931 full   | 3603  | No  | NA   | 0  | 2              | Low-quality     | Genome-fragment | 12.04 | 0     |
| S10_vs_1104371 full       | 2607  | No  | NA   | 0  | 0              | Not-determined  | Genome-fragment | NA    | 0     |
| S16_extracted_10025       | 3603  | No  | NA   | 1  | 0              | Low-quality     | Genome-fragment | 6.75  | 0     |
| S10_vs_1105531 full       | 3111  | No  | NA   | 0  | 2              | Not-determined  | Genome-fragment | NA    | 0     |
| S10_vs_1105691 full       | 1017  | No  | NA   | 0  | 1              | Not-determined  | Genome-fragment | NA    | 0     |
| S10_vs_1106581 full       | 2149  | No  | NA   | 0  | 1              | Not-determined  | Genome-fragment | NA    | 0     |
| S16_extracted_15550       | 3603  | No  | NA   | 1  | 0              | Low-quality     | Genome-fragment | 2.49  | 0     |
| S10_vs_1108351 full       | 1314  | No  | NA   | 0  | 0              | Not-determined  | Genome-fragment | NA    | 0     |
| S9_vs_k141_5897311 full   | 3604  | No  | NA   | 2  | 0              | Low-quality     | Genome-fragment | 9.01  | 0     |
| S8_extracted_k141_119197  | 3605  | No  | NA   | 0  | 3              | Low-quality     | Genome-fragment | 6.23  | 0     |
| S5_extracted_k141_106361  | 3606  | No  | NA   | 2  | 0              | Low-quality     | Genome-fragment | 8.67  | 0     |
| S5_vs_k141_538181 full    | 3606  | No  | NA   | 2  | 0              | Low-quality     | Genome-fragment | 7.42  | 0     |
| S10_vs_1116031 full       | 5636  | No  | NA   | 0  | 2              | Not-determined  | Genome-fragment | NA    | 0     |
| S9_vs_k141_425341 full    | 3608  | Yes | 1560 | 2  | 1              | Low-quality     | Genome-fragment | 2.81  | 56.76 |
| S10_vs_1120231 full       | 6941  | No  | NA   | 0  | 3              | Not-determined  | Genome-fragment | NA    | 0     |
| S5_vs_k141_1761311 full   | 3608  | No  | NA   | 0  | 3              | Low-quality     | Genome-fragment | 5.02  | 0     |
| S10_vs_1122241 full       | 1136  | No  | NA   | 0  | 0              | Not-determined  | Genome-fragment | NA    | 0     |
| S16_vs_1103911 full       | 3608  | No  | NA   | 0  | 3              | Low-quality     | Genome-fragment | 0.91  | 0     |
| S11_vs_k141_99511 full    | 3609  | No  | NA   | 0  | 0              | Low-quality     | Genome-fragment | 6.84  | 0     |
| S10_vs_1124961 full       | 1780  | No  | NA   | 0  | 0              | Not-determined  | Genome-fragment | NA    | 0     |
| S10_vs_1124971 full       | 1222  | No  | NA   | 0  | 1              | Not-determined  | Genome-fragment | NA    | 0     |
| S10_vs_1125241 full       | 1115  | No  | NA   | 0  | 0              | Not-determined  | Genome-fragment | NA    | 0     |
| S10_vs_1125251 full       | 1087  | No  | NA   | 0  | 2              | Not-determined  | Genome-fragment | NA    | 0     |
| S14_vs_k141_579271 full   | 3609  | No  | NA   | 0  | 2              | Low-quality     | Genome-fragment | 1.67  | 0     |
| S1_extracted_k141_10773   | 3609  | No  | NA   | 0  | 0              | Low-quality     | Genome-fragment | 9.32  | 0     |
| S5_vs_k141_1137151 full   | 3609  | No  | NA   | 0  | 0              | Low-quality     | Genome-fragment | 6.84  | 0     |
| S10_vs_1128611 full       | 1552  | No  | NA   | 0  | 0              | Not-determined  | Genome-fragment | NA    | 0     |
| S12_extracted_k141_79497  | 3609  | No  | NA   | 3  | 0              | Low-quality     | Genome-fragment | 8.16  | 0     |
| S10_vs_1132181 full       | 2516  | No  | NA   | 3  | Not-determined | Genome-fragment | NA              | 0     |       |
| S10_vs_1132411 full       | 2298  | No  | NA   | 0  | 1              | Not-determined  | Genome-fragment | NA    | 0     |
| S12_extracted_k141_111240 | 3609  | No  | NA   | 1  | 0              | Low-quality     | Genome-fragment | 6.97  | 0     |
| S10_vs_1133641 full       | 1450  | No  | NA   | 0  | 0              | Not-determined  | Genome-fragment | NA    | 0     |
| S14_extracted_k141_37191  | 3610  | No  | NA   | 3  | 0              | Low-quality     | Genome-fragment | 11.79 | 0     |
| S10_vs_1137301 full       | 4577  | No  | NA   | 0  | 0              | Not-determined  | Genome-fragment | NA    | 0     |
| S10_vs_1137321 full       | 6059  | No  | NA   | 0  | 1              | Not-determined  | Genome-fragment | NA    | 0     |
| S5_vs_k141_561561 full    | 3610  | No  | NA   | 0  | 1              | Low-quality     | Genome-fragment | 1.54  | 0     |
| S1_vs_k141_261321 full    | 3611  | No  | NA   | 0  | 1              | Low-quality     | Genome-fragment | 5.78  | 0     |
| S10_vs_1142171 full       | 2245  | No  | NA   | 0  | 3              | Not-determined  | Genome-fragment | NA    | 0     |
| S7_extracted_117395       | 3611  | No  | NA   | 0  | 0              | Low-quality     | Genome-fragment | 8.79  | 0     |
| S12_vs_k141_1671631 full  | 3612  | No  | NA   | 1  | 0              | Low-quality     | Genome-fragment | 7.71  | 0     |
| S10_vs_1143881 full       | 4573  | No  | NA   | 0  | 1              | Not-determined  | Genome-fragment | NA    | 0     |
| S12_vs_k141_6159581 full  | 3612  | No  | NA   | 0  | 0              | Low-quality     | Genome-fragment | 4.76  | 0     |
| S10_vs_1144181 full       | 4842  | No  | NA   | 1  | 4              | Not-determined  | Genome-fragment | NA    | 0     |
| S10_vs_1145831 full       | 1618  | No  | NA   | 0  | 1              | Not-determined  | Genome-fragment | NA    | 0     |
| S10_vs_1146061 full       | 2462  | No  | NA   | 0  | 2              | Not-determined  | Genome-fragment | NA    | 0     |
| S10_vs_1146731 full       | 9652  | No  | NA   | 0  | 3              | Not-determined  | Genome-fragment | NA    | 0     |
| S6_vs_k141_323701 full    | 3612  | No  | NA   | 0  | 1              | Low-quality     | Genome-fragment | 1.46  | 0     |
| S10_vs_1149661 full       | 1793  | No  | NA   | 0  | 2              | Not-determined  | Genome-fragment | NA    | 0     |
| S10_vs_1150151 full       | 7218  | No  | NA   | 0  | 2              | Not-determined  | Genome-fragment | NA    | 0     |
| S10_vs_1150331 full       | 1684  | No  | NA   | 0  | 1              | Not-determined  | Genome-fragment | NA    | 0     |
| S1_vs_k141_1083501 full   | 3613  | No  | NA   | 0  | 2              | Low-quality     | Genome-fragment | 1.58  | 0     |
| S10_vs_1150601 full       | 2362  | No  | NA   | 3  | Not-determined | Genome-fragment | NA              | 0     |       |
| S10_vs_1151551 full       | 1706  | No  | NA   | 0  | 1              | Not-determined  | Genome-fragment | NA    | 0     |
| S10_vs_1152531 full       | 1737  | No  | NA   | 0  | 0              | Not-determined  | Genome-fragment | NA    | 0     |
| S10_vs_1153141 full       | 1763  | No  | NA   | 0  | 2              | Not-determined  | Genome-fragment | NA    | 0     |
| S10_vs_1153611 full       | 2344  | No  | NA   | 0  | 1              | Not-determined  | Genome-fragment | NA    | 0     |
| S5_extracted_k141_582     | 3614  | No  | NA   | 5  | 0              | Low-quality     | Genome-fragment | 16.48 | 0     |
| S10_vs_1155011 full       | 2616  | No  | NA   | 0  | 2              | Not-determined  | Genome-fragment | NA    | 0     |
| S10_vs_1157221 full       | 3712  | No  | NA   | 0  | 2              | Not-determined  | Genome-fragment | NA    | 0     |
| S12_extracted_k141_152653 | 3614  | No  | NA   | 3  | 0              | Low-quality     | Genome-fragment | 3.7   | 0     |
| S10_vs_1158771 full       | 5426  | No  | NA   | 0  | 3              | Not-determined  | Genome-fragment | NA    | 0     |
| S10_vs_1159031 full       | 7516  | No  | NA   | 4  | Not-determined | Genome-fragment | NA              | 0     |       |
| S17_vs_k141_1150131 full  | 3615  | No  | NA   | 1  | 0              | Low-quality     | Genome-fragment | 5.2   | 0     |
| S10_vs_1161371 full       | 1410  | No  | NA   | 0  | 1              | Not-determined  | Genome-fragment | NA    | 0     |
| S1_vs_k141_217031 full    | 3615  | No  | NA   | 3  | 0              | Low-quality     | Genome-fragment | 8.78  | 0     |
| S5_extracted_k141_79931   | 3615  | No  | NA   | 0  | 0              | Low-quality     | Genome-fragment | 7.35  | 0     |
| S10_vs_1162871 full       | 3714  | No  | NA   | 0  | 2              | Not-determined  | Genome-fragment | NA    | 0     |
| S10_vs_1162971 full       | 1174  | No  | NA   | 0  | 1              | Not-determined  | Genome-fragment | NA    | 0     |
| S10_vs_1164261 full       | 5415  | No  | NA   | 0  | 4              | Not-determined  | Genome-fragment | NA    | 0     |
| S7_vs_837971 full         | 3615  | No  | NA   | 2  | 0              | Low-quality     | Genome-fragment | 10.15 | 0     |
| S8_extracted_k141_168032  | 3616  | No  | NA   | 1  | 0              | Low-quality     | Genome-fragment | 7.21  | 0     |
| S10_vs_1166361 full       | 1551  | No  | NA   | 0  | 0              | Not-determined  | Genome-fragment | NA    | 0     |
| S10_vs_1166701 full       | 1323  | No  | NA   | 0  | 0              | Not-determined  | Genome-fragment | NA    | 0     |
| S7_extracted_107889       | 3618  | No  | NA   | 1  | 0              | Low-quality     | Genome-fragment | 7.57  | 0     |
| S10_vs_1167791 full       | 2172  | No  | NA   | 0  | 2              | Not-determined  | Genome-fragment | NA    | 0     |
| S16_vs_1423341 full       | 3618  | Yes | 2496 | 1  | 1              | Low-quality     | Genome-fragment | 3     | 31.01 |
| S10_vs_1169661 full       | 1862  | No  | NA   | 0  | 0              | Not-determined  | Genome-fragment | NA    | 0     |
| S16_vs_1432701 full       | 3618  | No  | NA   | 0  | 2              | Low-quality     | Genome-fragment | 0.42  | 0     |
| S12_extracted_k141_13762  | 3618  | No  | NA   | 0  | 2              | Low-quality     | Genome-fragment | 1.22  | 0     |
| S10_vs_1171501 full       | 1836  | No  | NA   | 0  | 0              | Not-determined  | Genome-fragment | NA    | 0     |
| S17_extracted_k141_59740  | 3619  | No  | NA   | 0  | 2              | Low-quality     | Genome-fragment | 7.79  | 0     |
| S17_extracted_k141_18968  | 3619  | No  | NA   | 0  | 2              | Low-quality     | Genome-fragment | 4.17  | 0     |
| S10_vs_1173831 full       | 2090  | No  | NA   | 0  | 1              | Not-determined  | Genome-fragment | NA    | 0     |
| S14_vs_k141_1118871 full  | 3619  | No  | NA   | 1  | 0              | Low-quality     | Genome-fragment | 8.36  | 0     |
| S12_extracted_k141_177994 | 3619  | No  | NA   | 1  | 0              | Low-quality     | Genome-fragment | 1.73  | 0     |
| S10_vs_1176991 full       | 1056  | No  | NA   | 0  | 0              | Not-determined  | Genome-fragment | NA    | 0     |
| S10_vs_1178361 full       | 1124  | No  | NA   | 0  | 0              | Not-determined  | Genome-fragment | NA    | 0     |
| S10_vs_1179211 full       | 3126  | No  | NA   | 0  | 2              | Not-determined  | Genome-fragment | NA    | 0     |
| S10_vs_1179451 full       | 2451  | No  | NA   | 0  | 3              | Not-determined  | Genome-fragment | NA    | 0     |
| S10_vs_1180901 full       | 3822  | No  | NA   | 0  | 2              | Not-determined  | Genome-fragment | NA    | 0     |
| S3_extracted_k141_91234   | 3620  | No  | NA   | 0  | 1              | Low-quality     | Genome-fragment | 4.68  | 0     |
| S10_vs_1181841 full       | 1099  | No  | NA   | 0  | 1              | Not-determined  | Genome-fragment | NA    | 0     |
| S10_vs_1181891 full       | 3188  | No  | NA   | 0  | 0              | Not-determined  | Genome-fragment | NA    | 0     |
| S8_vs_k141_812081 full    | 3620  | No  | NA   | 0  | 0              | Low-quality     | Genome-fragment | 5.8   | 0     |
| S10_vs_1182541 full       | 1368  | No  | NA   | 0  | 2              | Not-determined  | Genome-fragment | NA    | 0     |
| S10_vs_1183201 full       | 2825  | No  | NA   | 0  | 1              | Not-determined  | Genome-fragment | NA    | 0     |
| S10_vs_1184931 full       | 2229  | No  | NA   | 0  | 2              | Not-determined  | Genome-fragment | NA    | 0     |
| S10_vs_1185751 full       | 2329  | No  | NA   | 0  | 2              | Not-determined  | Genome-fragment | NA    | 0     |
| S6_extracted_k141_15586   | 3621  | No  | NA   | 0  | 0              | Low-quality     | Genome-fragment | 2.68  | 0     |
| S10_vs_1187761 full       | 1405  | No  | NA   | 0  | 0              | Not-determined  | Genome-fragment | NA    | 0     |
| S5_vs_k141_156971 full    | 3622  | No  | NA   | 0  | 1              | Low-quality     | Genome-fragment | 2     | 0     |
| S7_vs_579301 full         | 3622  | No  | NA   | 0  | 0              | Low-quality     | Genome-fragment | 8.34  | 0     |
| S3_extracted_k141_21290   | 3623  | No  | NA   | 0  | 0              | Low-quality     | Genome-fragment | 8.16  | 0     |
| S10_vs_1190351 full       | 1215  | No  | NA   | 0  | 0              | Not-determined  | Genome-fragment | NA    | 0     |
| S10_vs_1192451 full       | 8694  | No  | NA   | 0  | 1              | Not-determined  | Genome-fragment | NA    | 0     |
| S5_extracted_k141_768     | 3624  | No  | NA   | 0  | 6              | Low-quality     | Genome-fragment | 2.37  | 0     |
| S10_vs_1192981 full       | 49258 | No  | NA   | 14 | 1              | High-quality    | High-quality    | 97.09 | 0     |
| S16_vs_1131741 full       | 3625  | No  | NA   | 0  | 1              | Low-quality     | Genome-fragment | 2.16  | 0     |
| S10_vs_1193171 full       | 4703  | No  | NA   | 0  | 3              | Not-determined  | Genome-fragment | NA    | 0     |
| S10_vs_1193761 full       | 5273  | No  | NA   | 0  | 4              | Not-determined  | Genome-fragment | NA    | 0     |
| S10_vs_1193991 full       | 1438  | No  | NA   | 0  | 1              | Not-determined  | Genome-fragment | NA    | 0     |
| S10_vs_1195231 full       | 1039  | No  | NA   | 0  | 1              | Not-determined  | Genome-fragment | NA    | 0     |
| S9_vs_k141_272461 full    | 3626  | No  | NA   | 0  | 0              | Low-quality     | Genome-fragment | 2.25  | 0     |
| S10_vs_1196281 full       | 4045  | No  | NA   | 0  | 2              | Not-determined  | Genome-fragment | NA    | 0     |
| S2_vs_k141_13021 full     | 3626  | No  | NA   | 0  | 0              | Low-quality     | Genome-fragment | 7.28  | 0     |
| S7_extracted_52192        | 3626  | No  | NA   | 0  | 0              | Low-quality     | Genome-fragment | 4.43  | 0     |
| S10_vs_1198331 full       | 3136  | No  | NA   | 0  | 0              | Not-determined  | Genome-fragment | NA    | 0     |
| S8_vs_k141_1849651 full   | 3626  | No  | NA   | 0  | 0              | Low-quality     | Genome-fragment | 7.01  | 0     |
| S9_vs_k141_63181 full     | 3627  | No  | NA   | 0  | 0              | Low-quality     | Genome-fragment | 6.76  | 0     |
| S10_vs_1199471 full       | 2763  | No  | NA   | 0  | 3              | Not-determined  | Genome-fragment | NA    | 0     |
| S10_vs_1199531 full       | 2423  | No  | NA   | 0  | 2              | Not-determined  | Genome-fragment | NA    | 0     |
| S10_extracted_60390       | 3628  | Yes | 1314 | 1  | 1              | Low-quality     | Genome-fragment | 0.87  | 61.23 |
| S10_vs_1202141 full       | 1084  | No  | NA   | 0  | 0              | Not-determined  | Genome-fragment | NA    | 0     |
| S1_vs_k141_1008281 full   | 3629  | No  | NA   | 0  | 0              | Low-quality     | Genome-fragment | 2.04  | 0     |
| S7_extracted_47653        | 3629  | No  | NA   | 1  | 0              | Low-quality     | Genome-fragment | 2.23  | 0     |
| S10_vs_1203661 full       | 1744  | No  | NA   | 0  | 2              | Not-determined  | Genome-fragment | NA    | 0     |
| S10_vs_1203671 full       | 1006  | No  | NA   | 0  | 2              | Not-determined  | Genome-fragment | NA    | 0     |
| S10_vs_1204101 full       | 5827  | No  | NA   | 0  | 1              | Not-determined  | Genome-fragment | NA    | 0     |
| S14_vs_k141_9011 full     | 3630  | No  | NA   | 1  | 0              | Low-quality     | Genome-fragment | 9.61  | 0     |
| S5_vs_k141_476871 full    | 3630  | No  | NA   | 1  | 1              | Low-quality     | Genome-fragment | 4.88  | 0     |
| S7_vs_10434361 full       | 3630  | No  | NA   | 0  | 0              | Low-quality     | Genome-fragment | 8.24  | 0     |
| S10_vs_1206241 full       | 2281  | No  | NA   | 0  | 3              | Not-determined  | Genome-fragment | NA    | 0     |
| S10_vs_1207341 full       | 1425  | No  | NA   | 0  | 1              | Not-determined  | Genome-fragment | NA    | 0     |
| S10_vs_1207491 full       | 2475  | No  | NA   | 0  | 0              | Not-determined  | Genome-fragment | NA    | 0     |
| S10_vs_1207991 full       | 3800  | No  | NA   | 2  | Not-determined | Genome-fragment | NA</            |       |       |



|                           |       |    |    |    |   |                |                 |       |       |
|---------------------------|-------|----|----|----|---|----------------|-----------------|-------|-------|
| 57_vs_76685  H2gene       | 3641  | No | NA | 2  | 0 | Low-quality    | Genome-fragment | 7.47  | 0     |
| S16_vs_128076  full       | 3642  | No | NA | 0  | 0 | Low-quality    | Genome-fragment | 8.99  | 0     |
| S10_vs_62567  full        | 3643  | No | NA | 0  | 0 | Low-quality    | Genome-fragment | 7.38  | 0     |
| S11_vs_k141_15327  full   | 3644  | No | NA | 1  | 0 | Low-quality    | Genome-fragment | 5.84  | 0     |
| S10_vs_24559  H2gene      | 2214  | No | NA | 0  | 1 | Not-determined | Genome-fragment | NA    | 0     |
| S7_vs_57495  full         | 3644  | No | NA | 0  | 0 | Low-quality    | Genome-fragment | 11.86 | 0     |
| S16_vs_37613  full        | 3644  | No | NA | 0  | 2 | Low-quality    | Genome-fragment | 1.91  | 0     |
| S16_vs_172431  full       | 3644  | No | NA | 0  | 2 | Low-quality    | Genome-fragment | 0.43  | 0     |
| S4_extracted_35063        | 3644  | No | NA | 0  | 0 | Low-quality    | Genome-fragment | 6.33  | 0     |
| S8_extracted_k141_142365  | 3644  | No | NA | 0  | 0 | Low-quality    | Genome-fragment | 9.18  | 0     |
| S8_vs_k141_71550  full    | 3644  | No | NA | 0  | 0 | Low-quality    | Genome-fragment | 2.42  | 0     |
| S13_extracted_97494       | 3645  | No | NA | 0  | 4 | Low-quality    | Genome-fragment | 1.13  | 0     |
| S5_extracted_k141_137232  | 3645  | No | NA | 0  | 1 | Low-quality    | Genome-fragment | 3.32  | 0     |
| S6_extracted_k141_41519   | 3645  | No | NA | 0  | 1 | Low-quality    | Genome-fragment | 4.62  | 0     |
| S8_extracted_k141_119530  | 3645  | No | NA | 0  | 2 | Low-quality    | Genome-fragment | 1.86  | 0     |
| S8_vs_k141_101841  full   | 3645  | No | NA | 0  | 0 | Low-quality    | Genome-fragment | 2.48  | 0     |
| S5_extracted_k141_123162  | 3646  | No | NA | 2  | 0 | Low-quality    | Genome-fragment | 7.34  | 0     |
| S8_extracted_k141_108292  | 3646  | No | NA | 0  | 2 | Low-quality    | Genome-fragment | 0.67  | 0     |
| S12_extracted_k141_66484  | 3647  | No | NA | 0  | 5 | Low-quality    | Genome-fragment | 4.26  | 0     |
| S11_extracted_k141_32203  | 3648  | No | NA | 1  | 0 | Low-quality    | Genome-fragment | 6.32  | 0     |
| S5_extracted_k141_68566   | 3648  | No | NA | 0  | 0 | Low-quality    | Genome-fragment | 3.91  | 0     |
| S7_extracted_62250        | 3648  | No | NA | 11 | 0 | Low-quality    | Genome-fragment | 12.04 | 0     |
| S6_extracted_k141_35391   | 3648  | No | NA | 0  | 3 | Low-quality    | Genome-fragment | 7.02  | 0     |
| S14_extracted_k141_104226 | 3649  | No | NA | 4  | 0 | Low-quality    | Genome-fragment | 11.99 | 0     |
| S15_extracted_74611       | 3649  | No | NA | 2  | 0 | Low-quality    | Genome-fragment | 8.07  | 0     |
| S14_extracted_k141_34441  | 3650  | No | NA | 11 | 0 | Low-quality    | Genome-fragment | 11.04 | 0     |
| S10_vs_56201  H2gene      | 1153  | No | NA | 0  | 0 | Not-determined | Genome-fragment | NA    | 0     |
| S11_vs_k141_85911  full   | 3651  | No | NA | 3  | 0 | Low-quality    | Genome-fragment | 9.37  | 0     |
| S3_extracted_k141_28527   | 3651  | No | NA | 0  | 2 | Low-quality    | Genome-fragment | 0.43  | 0     |
| S10_vs_66016  H2gene      | 1878  | No | NA | 0  | 0 | Not-determined | Genome-fragment | NA    | 0     |
| S7_vs_47415  full         | 3651  | No | NA | 1  | 0 | Low-quality    | Genome-fragment | 6.73  | 0     |
| S7_vs_44951  full         | 3652  | No | NA | 0  | 0 | Low-quality    | Genome-fragment | 8.75  | 0     |
| S7_vs_67435  full         | 3652  | No | NA | 2  | 0 | Low-quality    | Genome-fragment | 5.67  | 0     |
| S10_extracted_50293       | 3652  | No | NA | 1  | 0 | Low-quality    | Genome-fragment | 2.45  | 0     |
| S8_vs_k141_90375  full    | 3653  | No | NA | 0  | 0 | Low-quality    | Genome-fragment | 2.16  | 0     |
| S12_vs_k141_185763  full  | 3653  | No | NA | 0  | 2 | Low-quality    | Genome-fragment | 2.36  | 0     |
| S10_extracted_50941       | 3654  | No | NA | 0  | 1 | Low-quality    | Genome-fragment | 1.88  | 0     |
| S14_extracted_k141_2658   | 3655  | No | NA | 2  | 0 | Low-quality    | Genome-fragment | 1.56  | 0     |
| S1_vs_k141_13024  full    | 3655  | No | NA | 1  | 1 | Low-quality    | Genome-fragment | 1.61  | 0     |
| S5_vs_k141_113074  full   | 3655  | No | NA | 0  | 3 | Low-quality    | Genome-fragment | 2.44  | 0     |
| S11_extracted_k141_61550  | 3656  | No | NA | 1  | 0 | Low-quality    | Genome-fragment | 1.42  | 0     |
| S11_vs_k141_13122  full   | 3656  | No | NA | 0  | 0 | Low-quality    | Genome-fragment | 9.22  | 0     |
| S3_vs_k141_90000  full    | 3656  | No | NA | 4  | 0 | Low-quality    | Genome-fragment | 10.49 | 0     |
| S10_vs_83862  H2gene      | 1415  | No | NA | 0  | 0 | Not-determined | Genome-fragment | NA    | 0     |
| S5_vs_k141_140239  H2gene | 3656  | No | NA | 1  | 0 | Low-quality    | Genome-fragment | 7.58  | 0     |
| S7_extracted_13518        | 3656  | No | NA | 0  | 1 | Low-quality    | Genome-fragment | 0.67  | 0     |
| S8_vs_k141_207500  full   | 3656  | No | NA | 4  | 0 | Low-quality    | Genome-fragment | 6.12  | 0     |
| S1_extracted_k141_149005  | 3657  | No | NA | 1  | 0 | Low-quality    | Genome-fragment | 7.23  | 0     |
| S7_vs_79463  full         | 3657  | No | NA | 0  | 0 | Low-quality    | Genome-fragment | 8.86  | 0     |
| S10_vs_106737  full       | 3657  | No | NA | 0  | 0 | Low-quality    | Genome-fragment | 8.62  | 0     |
| S10_vs_85967  H2gene      | 1333  | No | NA | 0  | 1 | Not-determined | Genome-fragment | NA    | 0     |
| S17_vs_k141_40675  full   | 3658  | No | NA | 0  | 1 | Low-quality    | Genome-fragment | 10.45 | 0     |
| S11_extracted_k141_85675  | 3658  | No | NA | 0  | 1 | Low-quality    | Genome-fragment | 9.05  | 0     |
| S14_extracted_k141_15548  | 3658  | No | NA | 4  | 0 | Low-quality    | Genome-fragment | 9.09  | 0     |
| S12_vs_k141_163811  full  | 3658  | No | NA | 0  | 0 | Low-quality    | Genome-fragment | 8.5   | 0     |
| S7_extracted_104969       | 3659  | No | NA | 0  | 0 | Low-quality    | Genome-fragment | 2.19  | 0     |
| S7_vs_65992  full         | 3659  | No | NA | 2  | 0 | Low-quality    | Genome-fragment | 8.04  | 0     |
| S17_extracted_k141_70841  | 3660  | No | NA | 0  | 0 | Low-quality    | Genome-fragment | 2.12  | 0     |
| S10_vs_113010  H2gene     | 1207  | No | NA | 0  | 0 | Not-determined | Genome-fragment | NA    | 0     |
| S10_vs_112125  full       | 3660  | No | NA | 0  | 2 | Low-quality    | Genome-fragment | 1.64  | 0     |
| S8_extracted_k141_178148  | 3660  | No | NA | 1  | 0 | Low-quality    | Genome-fragment | 7.31  | 0     |
| S10_vs_114193  H2gene     | 1476  | No | NA | 0  | 0 | Not-determined | Genome-fragment | NA    | 0     |
| S7_extracted_21297        | 3661  | No | NA | 1  | 0 | Low-quality    | Genome-fragment | 3.78  | 0     |
| S10_vs_118871  H2gene     | 1025  | No | NA | 0  | 1 | Not-determined | Genome-fragment | NA    | 0     |
| S12_extracted_k141_117520 | 3661  | No | NA | 0  | 0 | Low-quality    | Genome-fragment | 8.39  | 0     |
| S12_extracted_k141_94490  | 1098  | No | NA | 0  | 0 | Not-determined | Genome-fragment | NA    | 0     |
| S12_extracted_k141_125990 | 1053  | No | NA | 0  | 0 | Not-determined | Genome-fragment | NA    | 0     |
| S12_extracted_k141_157478 | 1271  | No | NA | 0  | 1 | Not-determined | Genome-fragment | NA    | 0     |
| S12_extracted_k141_78749  | 1157  | No | NA | 0  | 0 | Not-determined | Genome-fragment | NA    | 0     |
| S12_extracted_k141_125996 | 1004  | No | NA | 0  | 0 | Not-determined | Genome-fragment | NA    | 0     |
| S12_extracted_k141_18113  | 1995  | No | NA | 0  | 1 | Not-determined | Genome-fragment | NA    | 0     |
| S8_extracted_k141_104607  | 3661  | No | NA | 0  | 0 | Low-quality    | Genome-fragment | 3.27  | 0     |
| S12_extracted_k141_86637  | 1651  | No | NA | 0  | 1 | Not-determined | Genome-fragment | NA    | 0     |
| S12_extracted_k141_86641  | 2008  | No | NA | 1  | 0 | Not-determined | Genome-fragment | NA    | 0     |
| S12_extracted_k141_23651  | 1413  | No | NA | 0  | 2 | Not-determined | Genome-fragment | NA    | 0     |
| S12_extracted_k141_78773  | 2127  | No | NA | 0  | 1 | Not-determined | Genome-fragment | NA    | 0     |
| S12_extracted_k141_31523  | 3136  | No | NA | 0  | 0 | Not-determined | Genome-fragment | NA    | 0     |
| S12_extracted_k141_138899 | 1698  | No | NA | 0  | 1 | Not-determined | Genome-fragment | NA    | 0     |
| S8_vs_k141_152979  full   | 3661  | No | NA | 0  | 1 | Low-quality    | Genome-fragment | 8.23  | 0     |
| S12_extracted_k141_110267 | 1439  | No | NA | 0  | 1 | Not-determined | Genome-fragment | NA    | 0     |
| S12_extracted_k141_31552  | 1200  | No | NA | 0  | 0 | Not-determined | Genome-fragment | NA    | 0     |
| S3_vs_k141_12841  full    | 3662  | No | NA | 0  | 0 | Low-quality    | Genome-fragment | 8.47  | 0     |
| S12_extracted_k141_110274 | 1713  | No | NA | 0  | 2 | Not-determined | Genome-fragment | NA    | 0     |
| S16_vs_82091  full        | 3663  | No | NA | 0  | 1 | Low-quality    | Genome-fragment | 2.06  | 0     |
| S12_extracted_k141_94549  | 1053  | No | NA | 0  | 1 | Not-determined | Genome-fragment | NA    | 0     |
| S10_extracted_43493       | 3663  | No | NA | 1  | 0 | Low-quality    | Genome-fragment | 7.97  | 0     |
| S12_extracted_k141_126060 | 2044  | No | NA | 0  | 1 | Not-determined | Genome-fragment | NA    | 0     |
| S7_vs_125527  full        | 3664  | No | NA | 0  | 2 | Low-quality    | Genome-fragment | 8.47  | 0     |
| S12_extracted_k141_102437 | 1558  | No | NA | 0  | 2 | Not-determined | Genome-fragment | NA    | 0     |
| S8_extracted_k141_132581  | 3664  | No | NA | 0  | 4 | Low-quality    | Genome-fragment | 1.37  | 0     |
| S12_extracted_k141_110299 | 1508  | No | NA | 0  | 1 | Not-determined | Genome-fragment | NA    | 0     |
| S12_extracted_k141_149629 | 1613  | No | NA | 0  | 0 | Not-determined | Genome-fragment | NA    | 0     |
| S12_extracted_k141_110303 | 1454  | No | NA | 0  | 2 | Not-determined | Genome-fragment | NA    | 0     |
| S7_extracted_67494        | 3665  | No | NA | 0  | 0 | Low-quality    | Genome-fragment | 8.15  | 0     |
| S12_extracted_k141_173301 | 1197  | No | NA | 0  | 2 | Not-determined | Genome-fragment | NA    | 0     |
| S12_extracted_k141_23695  | 12745 | No | NA | 0  | 3 | Not-determined | Genome-fragment | NA    | 0     |
| S12_extracted_k141_70950  | 1530  | No | NA | 0  | 0 | Not-determined | Genome-fragment | NA    | 0     |
| S12_extracted_k141_173306 | 1179  | No | NA | 0  | 0 | Not-determined | Genome-fragment | NA    | 0     |
| S12_extracted_k141_118161 | 1357  | No | NA | 0  | 0 | Not-determined | Genome-fragment | NA    | 0     |
| S14_vs_k141_104246  full  | 3666  | No | NA | 0  | 1 | Low-quality    | Genome-fragment | 6.44  | 0     |
| S12_extracted_k141_181182 | 1067  | No | NA | 0  | 1 | Not-determined | Genome-fragment | NA    | 0     |
| S12_extracted_k141_15807  | 2174  | No | NA | 0  | 2 | Not-determined | Genome-fragment | NA    | 0     |
| S12_extracted_k141_149698 | 1258  | No | NA | 0  | 1 | Not-determined | Genome-fragment | NA    | 0     |
| S12_extracted_k141_23726  | 1003  | No | NA | 0  | 1 | Not-determined | Genome-fragment | NA    | 0     |
| S14_vs_k141_83504  full   | 3666  | No | NA | 0  | 4 | Low-quality    | Genome-fragment | 3.17  | 0     |
| S14_vs_k141_84912  full   | 3666  | No | NA | 4  | 0 | Low-quality    | Genome-fragment | 8.86  | 0     |
| S12_extracted_k141_149725 | 1416  | No | NA | 0  | 0 | Not-determined | Genome-fragment | NA    | 0     |
| S12_extracted_k141_29446  | 1961  | No | NA | 0  | 2 | Not-determined | Genome-fragment | NA    | 0     |
| S12_extracted_k141_165495 | 5685  | No | NA | 0  | 2 | Not-determined | Genome-fragment | NA    | 0     |
| S12_extracted_k141_71007  | 1207  | No | NA | 0  | 0 | Not-determined | Genome-fragment | NA    | 0     |
| S12_extracted_k141_173355 | 1604  | No | NA | 0  | 1 | Not-determined | Genome-fragment | NA    | 0     |
| S12_extracted_k141_102488 | 2887  | No | NA | 0  | 0 | Not-determined | Genome-fragment | NA    | 0     |
| S12_extracted_k141_126149 | 8840  | No | NA | 0  | 3 | Not-determined | Genome-fragment | NA    | 0     |
| S12_extracted_k141_181218 | 1101  | No | NA | 0  | 1 | Not-determined | Genome-fragment | NA    | 0     |
| S12_extracted_k141_55175  | 42177 | No | NA | 9  | 1 | Complete       | High-quality    | 100   | 0     |
| S12_extracted_k141_8027   | 3974  | No | NA | 0  | 0 | Not-determined | Genome-fragment | NA    | 0     |
| S12_extracted_k141_63120  | 1179  | No | NA | 0  | 0 | Not-determined | Genome-fragment | NA    | 0     |
| S5_vs_k141_18062  full    | 3666  | No | NA | 0  | 1 | Low-quality    | Genome-fragment | 0.12  | 60.26 |
| S12_extracted_k141_165336 | 1006  | No | NA | 0  | 2 | Not-determined | Genome-fragment | NA    | 0     |
| S12_extracted_k141_47333  | 1250  | No | NA | 0  | 0 | Not-determined | Genome-fragment | NA    | 0     |
| S12_extracted_k141_124936 | 3666  | No | NA | 0  | 2 | Low-quality    | Genome-fragment | 1.8   | 0     |
| S12_extracted_k141_173391 | 1167  | No | NA | 0  | 2 | Not-determined | Genome-fragment | NA    | 0     |
| S12_vs_k141_155899  full  | 3666  | No | NA | 0  | 2 | Low-quality    | Genome-fragment | 1.03  | 0     |
| S12_extracted_k141_71053  | 4117  | No | NA | 0  | 2 | Not-determined | Genome-fragment | NA    | 0     |
| S12_extracted_k141_165532 | 1867  | No | NA | 0  | 1 | Not-determined | Genome-fragment | NA    | 0     |
| S12_extracted_k141_254    | 2212  | No | NA | 0  | 0 | Not-determined | Genome-fragment | NA    | 0     |
| S12_extracted_k141_78907  | 1664  | No | NA | 0  | 1 | Not-determined | Genome-fragment | NA    | 0     |
| S11_extracted_k141_21071  | 3667  | No | NA | 0  | 0 | Low-quality    | Genome-fragment | 8.08  | 0     |
| S12_extracted_k141_173404 | 1043  | No | NA | 0  | 1 | Not-determined | Genome-fragment | NA    | 0     |
| S5_vs_k141_12990  full    | 3667  | No | NA | 4  | 0 | Low-quality    | Genome-fragment | 7.3   | 0     |
| S12_extracted_k141_47376  | 1118  | No | NA | 0  | 2 | Not-determined | Genome-fragment | NA    | 0     |
| S12_extracted_k141_134025 | 7535  | No | NA | 0  | 4 | Not-determined | Genome-fragment | NA    | 0     |
| S12_extracted_k141_47384  | 1091  | No | NA | 0  | 0 | Not-determined | Genome-fragment | NA    | 0     |
| S12_extracted_k141_102561 | 1258  | No | NA | 0  | 0 | Not-determined | Genome-fragment | NA    | 0     |
| S11_extracted_k141_11936  | 3668  | No | NA | 0  | 1 | Low-quality    | Genome-fragment | 3.56  | 0     |
| S12_extracted_k141_110410 | 1413  | No | NA | 0  | 3 | Not-determined | Genome-fragment | NA    | 0     |
| S12_extracted_k141_94695  | 2044  | No | NA | 0  | 3 | Not-determined | Genome-fragment | NA    | 0     |
| S12_extracted_k141_134049 | 3221  | No | NA | 0  | 3 | Not-determined | Genome-fragment | NA    | 0     |
| S7_extracted_16274        | 3669  | No | NA | 2  | 0 | Low-quality    | Genome-fragment | 16.73 | 0     |
| S16_extracted_18718       | 3669  | No | NA | 0  | 0 | Low-quality    | Genome-fragment | 7.42  | 0     |
| S12_extracted_k141_78956  | 2161  | No | NA | 0  | 1 | Not-determined | Genome-fragment | NA    | 0     |
| S12_extracted_k141_181320 | 2058  | No | NA | 0  | 1 | Not-determined | Genome-fragment | NA    | 0     |
| S16_extracted_165517      | 3669  | No | NA | 0  | 2 | Low-quality    | Genome-fragment | 7.79  | 0     |
| S12_extracted_k141_134064 | 2061  | No | NA | 0  | 0 | Not-determined | Genome-fragment | NA    | 0     |
| S12_extracted_k141_1      |       |    |    |    |   |                |                 |       |       |



|                           |       |     |      |    |    |                |                 |    |       |
|---------------------------|-------|-----|------|----|----|----------------|-----------------|----|-------|
| S12_extracted_k141_431    | 2663  | No  | NA   | 0  | 1  | Not-determined | Genome-fragment | NA | 0     |
| S12_extracted_k141_165678 | 1127  | No  | NA   | 0  | 0  | Not-determined | Genome-fragment | NA | 0     |
| S12_extracted_k141_86996  | 1690  | No  | NA   | 0  | 0  | Not-determined | Genome-fragment | NA | 0     |
| S12_extracted_k141_63327  | 1201  | No  | NA   | 0  | 2  | Not-determined | Genome-fragment | NA | 0     |
| S12_extracted_k141_63329  | 1395  | No  | NA   | 0  | 1  | Not-determined | Genome-fragment | NA | 0     |
| S12_extracted_k141_15959  | 3684  | No  | NA   | 0  | 1  | Not-determined | Genome-fragment | NA | 0     |
| S11_vs_k141_5369  full    | 3671  | No  | NA   | 0  | 0  | Low-quality    | Genome-fragment | NA | 7.29  |
| S12_extracted_k141_55382  | 1021  | No  | NA   | 0  | 0  | Not-determined | Genome-fragment | NA | 0     |
| S13_extracted_10522       | 3672  | No  | NA   | 0  | 1  | Low-quality    | Genome-fragment | NA | 6.57  |
| S12_extracted_k141_55390  | 9834  | No  | NA   | 0  | 3  | Not-determined | Genome-fragment | NA | 0     |
| S5_vs_k141_110519  full   | 3672  | No  | NA   | 0  | 1  | Low-quality    | Genome-fragment | NA | 5.66  |
| S12_extracted_k141_17038  | 3783  | No  | NA   | 0  | 1  | Not-determined | Genome-fragment | NA | 0     |
| S12_extracted_k141_55404  | 1332  | No  | NA   | 0  | 1  | Not-determined | Genome-fragment | NA | 0     |
| S5_vs_k141_102365  full   | 3672  | No  | NA   | 0  | 1  | Low-quality    | Genome-fragment | NA | 5.3   |
| S12_extracted_k141_142082 | 4271  | No  | NA   | 0  | 3  | Not-determined | Genome-fragment | NA | 0     |
| S12_extracted_k141_148892 | 2096  | No  | NA   | 0  | 0  | Not-determined | Genome-fragment | NA | 0     |
| S12_extracted_k141_15984  | 56306 | No  | NA   | 0  | 24 | Not-determined | Genome-fragment | NA | 0     |
| S12_extracted_k141_39754  | 4849  | No  | NA   | 0  | 4  | Not-determined | Genome-fragment | NA | 0     |
| S12_extracted_k141_181409 | 1679  | No  | NA   | 0  | 1  | Not-determined | Genome-fragment | NA | 0     |
| S12_extracted_k141_25442  | 1383  | No  | NA   | 0  | 1  | Not-determined | Genome-fragment | NA | 0     |
| S12_extracted_k141_79130  | 3570  | No  | NA   | 0  | 2  | Not-determined | Genome-fragment | NA | 0     |
| S12_extracted_k141_24904  | 1592  | No  | NA   | 0  | 1  | Not-determined | Genome-fragment | NA | 0     |
| S12_extracted_k141_509    | 7064  | No  | NA   | 0  | 1  | Not-determined | Genome-fragment | NA | 0     |
| S16_extracted_81079       | 3672  | No  | NA   | 0  | 2  | Low-quality    | Genome-fragment | NA | 1.45  |
| S12_extracted_k141_79131  | 1794  | No  | NA   | 0  | 0  | Not-determined | Genome-fragment | NA | 0     |
| S12_extracted_k141_79133  | 1530  | No  | NA   | 0  | 1  | Not-determined | Genome-fragment | NA | 0     |
| S12_extracted_k141_181422 | 1226  | No  | NA   | 0  | 0  | Not-determined | Genome-fragment | NA | 0     |
| S12_extracted_k141_31767  | 1101  | No  | NA   | 0  | 1  | Not-determined | Genome-fragment | NA | 0     |
| S12_extracted_k141_142154 | 5957  | No  | NA   | 0  | 1  | Not-determined | Genome-fragment | NA | 0     |
| S12_extracted_k141_181430 | 2825  | No  | NA   | 0  | 1  | Not-determined | Genome-fragment | NA | 0     |
| S12_extracted_k141_181433 | 1292  | No  | NA   | 0  | 0  | Not-determined | Genome-fragment | NA | 0     |
| S12_extracted_k141_2391   | 1488  | No  | NA   | 0  | 1  | Not-determined | Genome-fragment | NA | 0     |
| S12_extracted_k141_63420  | 1661  | No  | NA   | 0  | 2  | Not-determined | Genome-fragment | NA | 0     |
| S8_extracted_k141_63270   | 3672  | No  | NA   | 0  | 1  | Low-quality    | Genome-fragment | NA | 1.52  |
| S12_extracted_k141_142183 | 1313  | No  | NA   | 0  | 1  | Not-determined | Genome-fragment | NA | 0     |
| S12_extracted_k141_31815  | 1023  | No  | NA   | 0  | 1  | Not-determined | Genome-fragment | NA | 0     |
| S9_vs_k141_82632  full    | 3674  | No  | NA   | 0  | 1  | Low-quality    | Genome-fragment | NA | 2.32  |
| S12_extracted_k141_87092  | 1025  | No  | NA   | 0  | 1  | Not-determined | Genome-fragment | NA | 0     |
| S12_extracted_k141_157881 | 1851  | No  | NA   | 0  | 4  | Not-determined | Genome-fragment | NA | 0     |
| S12_extracted_k141_79189  | 5230  | No  | NA   | 0  | 0  | Not-determined | Genome-fragment | NA | 0     |
| S12_extracted_k141_142195 | 3477  | No  | NA   | 0  | 3  | Not-determined | Genome-fragment | NA | 0     |
| S2_vs_k141_30480  full    | 3674  | No  | NA   | 0  | 1  | Low-quality    | Genome-fragment | NA | 2.48  |
| S16_extracted_62385       | 3674  | No  | NA   | 0  | 2  | Low-quality    | Genome-fragment | NA | 3.6   |
| S12_extracted_k141_63453  | 1441  | No  | NA   | 0  | 1  | Not-determined | Genome-fragment | NA | 0     |
| S12_extracted_k141_16049  | 5462  | No  | NA   | 0  | 2  | Not-determined | Genome-fragment | NA | 0     |
| S17_extracted_k141_87470  | 3675  | No  | NA   | 0  | 1  | Low-quality    | Genome-fragment | NA | 0.32  |
| S12_extracted_k141_586    | 1336  | No  | NA   | 0  | 1  | Not-determined | Genome-fragment | NA | 0     |
| S12_extracted_k141_126512 | 1000  | No  | NA   | 0  | 2  | Not-determined | Genome-fragment | NA | 0     |
| S12_extracted_k141_142217 | 5625  | No  | NA   | 0  | 2  | Not-determined | Genome-fragment | NA | 0     |
| S12_extracted_k141_142219 | 1255  | No  | NA   | 0  | 2  | Not-determined | Genome-fragment | NA | 0     |
| S12_extracted_k141_134163 | 1982  | No  | NA   | 0  | 1  | Not-determined | Genome-fragment | NA | 0     |
| S12_extracted_k141_87123  | 1826  | No  | NA   | 0  | 1  | Not-determined | Genome-fragment | NA | 0     |
| S11_vs_k141_28038  full   | 3676  | Yes | 2571 | 1  | 1  | Low-quality    | Genome-fragment | NA | 5.46  |
| S12_extracted_k141_31868  | 2308  | No  | NA   | 0  | 1  | Not-determined | Genome-fragment | NA | 0     |
| S12_extracted_k141_16075  | 2021  | No  | NA   | 0  | 1  | Not-determined | Genome-fragment | NA | 0     |
| S12_extracted_k141_118583 | 1117  | No  | NA   | 0  | 1  | Not-determined | Genome-fragment | NA | 0     |
| S12_extracted_k141_655    | 2204  | No  | NA   | 0  | 2  | Not-determined | Genome-fragment | NA | 0     |
| S1_extracted_k141_145217  | 3676  | No  | NA   | 0  | 0  | Low-quality    | Genome-fragment | NA | 3.94  |
| S12_extracted_k141_659    | 4580  | No  | NA   | 0  | 2  | Not-determined | Genome-fragment | NA | 0     |
| S12_extracted_k141_181533 | 5844  | No  | NA   | 0  | 2  | Not-determined | Genome-fragment | NA | 0     |
| S12_extracted_k141_55556  | 2756  | No  | NA   | 0  | 0  | Not-determined | Genome-fragment | NA | 0     |
| S5_vs_k141_117606  full   | 3676  | No  | NA   | 0  | 0  | Low-quality    | Genome-fragment | NA | 3.37  |
| S12_extracted_k141_87173  | 1089  | No  | NA   | 0  | 0  | Not-determined | Genome-fragment | NA | 0     |
| S12_extracted_k141_87174  | 1623  | No  | NA   | 0  | 1  | Not-determined | Genome-fragment | NA | 0     |
| S5_extracted_k141_28349   | 3677  | No  | NA   | 0  | 0  | Low-quality    | Genome-fragment | NA | 2.06  |
| S12_extracted_k141_165840 | 1081  | No  | NA   | 0  | 1  | Not-determined | Genome-fragment | NA | 0     |
| S12_extracted_k141_71306  | 1017  | No  | NA   | 0  | 1  | Not-determined | Genome-fragment | NA | 0     |
| S11_extracted_k141_98419  | 3679  | No  | NA   | 0  | 1  | Low-quality    | Genome-fragment | NA | 12.51 |
| S12_extracted_k141_697    | 1905  | No  | NA   | 0  | 0  | Not-determined | Genome-fragment | NA | 0     |
| S12_extracted_k141_8284   | 1064  | No  | NA   | 0  | 1  | Not-determined | Genome-fragment | NA | 0     |
| S12_extracted_k141_79284  | 5446  | No  | NA   | 0  | 5  | Not-determined | Genome-fragment | NA | 0     |
| S7_vs_4804  full          | 3679  | No  | NA   | 0  | 1  | Low-quality    | Genome-fragment | NA | 5.96  |
| S12_extracted_k141_181571 | 6963  | No  | NA   | 0  | 2  | Not-determined | Genome-fragment | NA | 0     |
| S12_extracted_k141_150059 | 1482  | No  | NA   | 0  | 1  | Not-determined | Genome-fragment | NA | 0     |
| S12_extracted_k141_142342 | 1896  | No  | NA   | 0  | 1  | Not-determined | Genome-fragment | NA | 0     |
| S16_vs_145504  full       | 3679  | No  | NA   | 1  | 0  | Low-quality    | Genome-fragment | NA | 6.76  |
| S12_extracted_k141_31898  | 5387  | No  | NA   | 0  | 4  | Not-determined | Genome-fragment | NA | 0     |
| S12_extracted_k141_31904  | 2527  | No  | NA   | 0  | 3  | Not-determined | Genome-fragment | NA | 0     |
| S12_extracted_k141_54996  | 1542  | No  | NA   | 0  | 1  | Not-determined | Genome-fragment | NA | 0     |
| S12_extracted_k141_31909  | 1591  | No  | NA   | 0  | 1  | Not-determined | Genome-fragment | NA | 0     |
| S12_extracted_k141_95000  | 1359  | No  | NA   | 0  | 0  | Not-determined | Genome-fragment | NA | 0     |
| S12_extracted_k141_31917  | 1260  | No  | NA   | 0  | 0  | Not-determined | Genome-fragment | NA | 0     |
| S12_extracted_k141_732    | 1024  | No  | NA   | 0  | 0  | Not-determined | Genome-fragment | NA | 0     |
| S12_extracted_k141_102828 | 1069  | No  | NA   | 0  | 0  | Not-determined | Genome-fragment | NA | 0     |
| S8_extracted_k141_74219   | 3680  | No  | NA   | 0  | 0  | Low-quality    | Genome-fragment | NA | 13.13 |
| S12_extracted_k141_8321   | 1022  | No  | NA   | 0  | 1  | Not-determined | Genome-fragment | NA | 0     |
| S12_extracted_k141_747    | 3039  | No  | NA   | 0  | 1  | Not-determined | Genome-fragment | NA | 0     |
| S12_extracted_k141_38885  | 1293  | No  | NA   | 0  | 1  | Not-determined | Genome-fragment | NA | 0     |
| S12_extracted_k141_8334   | 1216  | No  | NA   | 0  | 1  | Not-determined | Genome-fragment | NA | 0     |
| S8_vs_k141_129837  full   | 3680  | No  | NA   | 0  | 0  | Low-quality    | Genome-fragment | NA | 4.56  |
| S12_extracted_k141_150132 | 1029  | No  | NA   | 0  | 1  | Not-determined | Genome-fragment | NA | 0     |
| S12_extracted_k141_102879 | 2293  | No  | NA   | 0  | 0  | Not-determined | Genome-fragment | NA | 0     |
| S12_extracted_k141_118744 | 1025  | No  | NA   | 0  | 0  | Not-determined | Genome-fragment | NA | 0     |
| S12_extracted_k141_786    | 1514  | No  | NA   | 0  | 0  | Not-determined | Genome-fragment | NA | 0     |
| S17_vs_k141_105050  full  | 3681  | No  | NA   | 0  | 0  | Low-quality    | Genome-fragment | NA | 8.56  |
| S12_extracted_k141_86879  | 3681  | No  | NA   | 0  | 0  | Low-quality    | Genome-fragment | NA | 2.03  |
| S16_extracted_36472       | 3681  | No  | NA   | 0  | 4  | Low-quality    | Genome-fragment | NA | 1.38  |
| S12_extracted_k141_158081 | 2289  | No  | NA   | 0  | 0  | Not-determined | Genome-fragment | NA | 0     |
| S12_extracted_k141_142439 | 3351  | No  | NA   | 0  | 7  | Not-determined | Genome-fragment | NA | 0     |
| S14_vs_k141_78435  full   | 3682  | No  | NA   | 1  | 0  | Low-quality    | Genome-fragment | NA | 6.32  |
| S12_extracted_k141_87372  | 3449  | No  | NA   | 0  | 1  | Not-determined | Genome-fragment | NA | 0     |
| S15_vs_39960  full        | 3682  | No  | NA   | 0  | 0  | Low-quality    | Genome-fragment | NA | 7.61  |
| S12_extracted_k141_47605  | 1622  | No  | NA   | 0  | 2  | Not-determined | Genome-fragment | NA | 0     |
| S12_extracted_k141_16124  | 3767  | No  | NA   | 0  | 0  | Not-determined | Genome-fragment | NA | 0     |
| S12_extracted_k141_134202 | 7964  | No  | NA   | 0  | 2  | Not-determined | Genome-fragment | NA | 0     |
| S8_vs_k141_130274  full   | 3682  | No  | NA   | 0  | 3  | Low-quality    | Genome-fragment | NA | 0.91  |
| S12_extracted_k141_32023  | 2220  | No  | NA   | 0  | 4  | Not-determined | Genome-fragment | NA | 0     |
| S12_extracted_k141_39956  | 10001 | No  | NA   | 0  | 3  | Not-determined | Genome-fragment | NA | 0     |
| S16_vs_97853  full        | 3683  | No  | NA   | 0  | 0  | Low-quality    | Genome-fragment | NA | 2.17  |
| S12_extracted_k141_118797 | 11596 | No  | NA   | 0  | 3  | Not-determined | Genome-fragment | NA | 0     |
| S12_extracted_k141_16163  | 1265  | No  | NA   | 0  | 2  | Not-determined | Genome-fragment | NA | 0     |
| S12_extracted_k141_134346 | 1226  | No  | NA   | 0  | 0  | Not-determined | Genome-fragment | NA | 0     |
| S12_extracted_k141_95164  | 1013  | No  | NA   | 0  | 0  | Not-determined | Genome-fragment | NA | 0     |
| S12_extracted_k141_173666 | 30650 | No  | NA   | 18 | 1  | High-quality   | High-quality    | NA | 95.84 |
| S12_extracted_k141_12671  | 3683  | No  | NA   | 1  | 0  | Low-quality    | Genome-fragment | NA | 4.7   |
| S12_extracted_k141_32056  | 8543  | No  | NA   | 0  | 2  | Not-determined | Genome-fragment | NA | 0     |
| S12_extracted_k141_55709  | 3012  | No  | NA   | 0  | 1  | Not-determined | Genome-fragment | NA | 0     |
| S12_extracted_k141_126656 | 3749  | No  | NA   | 0  | 5  | Not-determined | Genome-fragment | NA | 0     |
| S12_extracted_k141_95180  | 4665  | No  | NA   | 0  | 3  | Not-determined | Genome-fragment | NA | 0     |
| S12_extracted_k141_32061  | 7946  | No  | NA   | 0  | 2  | Not-determined | Genome-fragment | NA | 0     |
| S12_extracted_k141_150230 | 1684  | No  | NA   | 0  | 1  | Not-determined | Genome-fragment | NA | 0     |
| S8_vs_k141_126511  full   | 3683  | No  | NA   | 0  | 2  | Low-quality    | Genome-fragment | NA | 1.15  |
| S12_extracted_k141_173675 | 2312  | No  | NA   | 0  | 1  | Not-determined | Genome-fragment | NA | 0     |
| S3_vs_k141_1950  full     | 3684  | No  | NA   | 0  | 3  | Low-quality    | Genome-fragment | NA | 2.04  |
| S12_extracted_k141_11605  | 3684  | No  | NA   | 0  | 0  | Low-quality    | Genome-fragment | NA | 8.9   |
| S11_extracted_k141_21258  | 3685  | No  | NA   | 1  | 0  | Low-quality    | Genome-fragment | NA | 9.1   |
| S12_extracted_k141_24209  | 1212  | No  | NA   | 0  | 1  | Not-determined | Genome-fragment | NA | 0     |
| S14_extracted_k141_51535  | 3685  | No  | NA   | 0  | 0  | Low-quality    | Genome-fragment | NA | 12.12 |
| S12_extracted_k141_24211  | 1127  | No  | NA   | 0  | 0  | Not-determined | Genome-fragment | NA | 0     |
| S12_vs_k141_111272  full  | 3685  | Yes | 1802 | 1  | 2  | Low-quality    | Genome-fragment | NA | 0.94  |
| S12_vs_k141_116875  full  | 3685  | No  | NA   | 0  | 2  | Low-quality    | Genome-fragment | NA | 2.53  |
| S16_extracted_34778       | 3686  | No  | NA   | 0  | 0  | Low-quality    | Genome-fragment | NA | 8.55  |
| S12_extracted_k141_87347  | 3137  | No  | NA   | 0  | 0  | Not-determined | Genome-fragment | NA | 0     |
| S12_extracted_k141_166066 | 1099  | No  | NA   | 0  | 1  | Not-determined | Genome-fragment | NA | 0     |
| S13_vs_57457  full        | 3687  | No  | NA   | 0  | 1  | Low-quality    | Genome-fragment | NA | 8.79  |
| S12_extracted_k141_55765  | 1105  | No  | NA   | 0  | 0  | Not-determined | Genome-fragment | NA | 0     |
| S12_extracted_k141_40072  | 1006  | No  | NA   | 0  | 0  | Not-determined | Genome-fragment | NA | 0     |
| S12_extracted_k141_55789  | 1058  | No  | NA   | 0  | 0  | Not-determined | Genome-fragment | NA | 0     |
| S12_extracted_k141_158163 | 3730  | No  | NA   | 0  | 4  | Not-determined | Genome-fragment | NA | 0     |
| S12_extracted_k141_8552   | 1153  | No  | NA   | 0  | 1  | Not-determined | Genome-fragment | NA | 0     |
| S12_extracted_k141_150299 | 3310  | No  | NA   | 0  | 0  | Not-determined | Genome-fragment | NA | 0     |
| S12_extracted_k141_16280  | 9800  | No  | NA   | 0  | 1  | Not-determined | Genome-fragment | NA | 0     |
| S12_extracted_k141_150302 | 1104  | No  | NA   | 0  | 2  | Not-determined | Genome-fragment | NA | 0     |
| S12_extracted_k141_103119 | 5124  | No  | NA   | 0  | 3  | Not-determined | Genome-fragment | NA | 0     |
| S12_extracted_k141_158195 | 1141  | No  | NA</ |    |    |                |                 |    |       |



|                           |       |     |       |    |   |                |                 |       |      |
|---------------------------|-------|-----|-------|----|---|----------------|-----------------|-------|------|
| S12_extracted_k141_32240  | 1946  | No  | NA    | 0  | 1 | Not-determined | Genome-fragment | NA    | 0    |
| S12_extracted_k141_35910  | 1229  | No  | NA    | 0  | 0 | Not-determined | Genome-fragment | NA    | 0    |
| S12_extracted_k141_47746  | 1508  | No  | NA    | 0  | 0 | Not-determined | Genome-fragment | NA    | 0    |
| S12_extracted_k141_103252 | 1959  | No  | NA    | 0  | 0 | Not-determined | Genome-fragment | NA    | 0    |
| S12_extracted_k141_95273  | 1288  | No  | NA    | 0  | 0 | Not-determined | Genome-fragment | NA    | 0    |
| S12_extracted_k141_150411 | 4520  | No  | NA    | 0  | 0 | Not-determined | Genome-fragment | NA    | 0    |
| S11_vs_k141_90813  full   | 3690  | No  | NA    | 5  | 0 | Low-quality    | Genome-fragment | 5.67  | 0    |
| S12_extracted_k141_63874  | 3195  | No  | NA    | 0  | 5 | Not-determined | Genome-fragment | NA    | 0    |
| S12_extracted_k141_95277  | 1492  | No  | NA    | 0  | 0 | Not-determined | Genome-fragment | NA    | 0    |
| S12_extracted_k141_134487 | 3193  | No  | NA    | 0  | 0 | Not-determined | Genome-fragment | NA    | 0    |
| S12_extracted_k141_47766  | 1226  | No  | NA    | 0  | 2 | Not-determined | Genome-fragment | NA    | 0    |
| S16_extracted_114224      | 3690  | No  | NA    | 0  | 0 | Low-quality    | Genome-fragment | 5.36  | 0    |
| S12_extracted_k141_71673  | 1295  | No  | NA    | 1  | 0 | Not-determined | Genome-fragment | NA    | 0    |
| S12_extracted_k141_173913 | 1098  | No  | NA    | 0  | 1 | Not-determined | Genome-fragment | NA    | 0    |
| S12_extracted_k141_24409  | 1667  | No  | NA    | 0  | 1 | Not-determined | Genome-fragment | NA    | 0    |
| S12_extracted_k141_13206  | 1305  | No  | NA    | 0  | 0 | Not-determined | Genome-fragment | NA    | 0    |
| S12_extracted_k141_16374  | 59768 | Yes | 53251 | 13 | 4 | High-quality   | High-quality    | 91.23 | 10.9 |
| S12_extracted_k141_24424  | 1068  | No  | NA    | 0  | 1 | Not-determined | Genome-fragment | NA    | 0    |
| S12_extracted_k141_79601  | 7141  | No  | NA    | 0  | 2 | Not-determined | Genome-fragment | NA    | 0    |
| S10_vs_63281  full        | 3690  | No  | NA    | 4  | 0 | Low-quality    | Genome-fragment | 8.81  | 0    |
| S12_extracted_k141_103320 | 1548  | No  | NA    | 0  | 2 | Not-determined | Genome-fragment | NA    | 0    |
| S12_extracted_k141_126791 | 1002  | No  | NA    | 0  | 1 | Not-determined | Genome-fragment | NA    | 0    |
| S12_extracted_k141_142659 | 5393  | No  | NA    | 0  | 1 | Not-determined | Genome-fragment | NA    | 0    |
| S12_extracted_k141_181942 | 2691  | No  | NA    | 0  | 1 | Not-determined | Genome-fragment | NA    | 0    |
| S12_extracted_k141_134544 | 1646  | No  | NA    | 0  | 0 | Not-determined | Genome-fragment | NA    | 0    |
| S12_extracted_k141_79621  | 1166  | No  | NA    | 0  | 2 | Not-determined | Genome-fragment | NA    | 0    |
| S12_extracted_k141_71696  | 3025  | No  | NA    | 0  | 1 | Not-determined | Genome-fragment | NA    | 0    |
| S12_extracted_k141_166251 | 3206  | No  | NA    | 0  | 3 | Not-determined | Genome-fragment | NA    | 0    |
| S12_extracted_k141_16409  | 4950  | No  | NA    | 0  | 1 | Not-determined | Genome-fragment | NA    | 0    |
| S12_extracted_k141_142684 | 1169  | No  | NA    | 0  | 0 | Not-determined | Genome-fragment | NA    | 0    |
| S12_vs_k141_165940  full  | 3690  | No  | NA    | 1  | 0 | Low-quality    | Genome-fragment | 9.71  | 0    |
| S12_extracted_k141_173987 | 2689  | No  | NA    | 0  | 2 | Not-determined | Genome-fragment | NA    | 0    |
| S12_extracted_k141_134588 | 1408  | No  | NA    | 0  | 1 | Not-determined | Genome-fragment | NA    | 0    |
| S12_extracted_k141_95326  | 1418  | No  | NA    | 0  | 0 | Not-determined | Genome-fragment | NA    | 0    |
| S12_extracted_k141_12421  | 2041  | No  | NA    | 0  | 0 | Not-determined | Genome-fragment | NA    | 0    |
| S12_extracted_k141_17878  | 1083  | No  | NA    | 0  | 0 | Not-determined | Genome-fragment | NA    | 0    |
| S12_extracted_k141_95328  | 2310  | No  | NA    | 0  | 0 | Not-determined | Genome-fragment | NA    | 0    |
| S12_extracted_k141_1072   | 4153  | No  | NA    | 0  | 3 | Not-determined | Genome-fragment | NA    | 0    |
| S12_extracted_k141_173940 | 3712  | No  | NA    | 0  | 0 | Not-determined | Genome-fragment | NA    | 0    |
| S12_extracted_k141_63983  | 1044  | No  | NA    | 0  | 1 | Not-determined | Genome-fragment | NA    | 0    |
| S12_extracted_k141_134603 | 1069  | No  | NA    | 0  | 0 | Not-determined | Genome-fragment | NA    | 0    |
| S12_extracted_k141_166287 | 5491  | No  | NA    | 0  | 1 | Not-determined | Genome-fragment | NA    | 0    |
| S12_extracted_k141_1096   | 4162  | No  | NA    | 0  | 3 | Not-determined | Genome-fragment | NA    | 0    |
| S12_extracted_k141_119036 | 1288  | No  | NA    | 0  | 1 | Not-determined | Genome-fragment | NA    | 0    |
| S12_extracted_k141_95369  | 1899  | No  | NA    | 0  | 1 | Not-determined | Genome-fragment | NA    | 0    |
| S12_extracted_k141_40287  | 1154  | No  | NA    | 0  | 1 | Not-determined | Genome-fragment | NA    | 0    |
| S12_extracted_k141_126856 | 1395  | No  | NA    | 0  | 0 | Not-determined | Genome-fragment | NA    | 0    |
| S12_extracted_k141_95371  | 1330  | No  | NA    | 0  | 2 | Not-determined | Genome-fragment | NA    | 0    |
| S12_extracted_k141_40292  | 1086  | No  | NA    | 0  | 1 | Not-determined | Genome-fragment | NA    | 0    |
| S12_extracted_k141_126872 | 1064  | No  | NA    | 0  | 1 | Not-determined | Genome-fragment | NA    | 0    |
| S17_extracted_k141_16761  | 3693  | No  | NA    | 0  | 2 | Low-quality    | Genome-fragment | 0.39  | 0    |
| S5_extracted_k141_71464   | 3693  | No  | NA    | 0  | 0 | Low-quality    | Genome-fragment | 7.98  | 0    |
| S5_vs_k141_102199  full   | 3693  | No  | NA    | 1  | 0 | Low-quality    | Genome-fragment | NA    | 0    |
| S12_extracted_k141_158427 | 2055  | No  | NA    | 0  | 1 | Not-determined | Genome-fragment | NA    | 0    |
| S9_vs_k141_27619  full    | 3694  | No  | NA    | 0  | 0 | Low-quality    | Genome-fragment | 1.87  | 0    |
| S14_vs_k141_45640  full   | 3694  | No  | NA    | 0  | 2 | Low-quality    | Genome-fragment | 2.36  | 0    |
| S12_extracted_k141_16489  | 1485  | No  | NA    | 0  | 2 | Not-determined | Genome-fragment | NA    | 0    |
| S12_extracted_k141_50802  | 10917 | No  | NA    | 0  | 6 | Not-determined | Genome-fragment | NA    | 0    |
| S12_extracted_k141_13285  | 4720  | No  | NA    | 0  | 3 | Not-determined | Genome-fragment | NA    | 0    |
| S12_extracted_k141_110845 | 11911 | No  | NA    | 0  | 5 | Not-determined | Genome-fragment | NA    | 0    |
| S12_extracted_k141_103444 | 3058  | No  | NA    | 0  | 0 | Not-determined | Genome-fragment | NA    | 0    |
| S12_extracted_k141_103450 | 1102  | No  | NA    | 0  | 1 | Not-determined | Genome-fragment | NA    | 0    |
| S5_vs_k141_68569  full    | 3694  | No  | NA    | 1  | 0 | Low-quality    | Genome-fragment | 7.82  | 0    |
| S12_extracted_k141_166366 | 3084  | No  | NA    | 0  | 2 | Not-determined | Genome-fragment | NA    | 0    |
| S11_vs_k141_50010  full   | 3695  | No  | NA    | 0  | 0 | Low-quality    | Genome-fragment | 7.59  | 0    |
| S12_extracted_k141_16533  | 1516  | No  | NA    | 0  | 1 | Not-determined | Genome-fragment | NA    | 0    |
| S12_extracted_k141_182140 | 1214  | No  | NA    | 0  | 1 | Not-determined | Genome-fragment | NA    | 0    |
| S12_extracted_k141_40386  | 1113  | No  | NA    | 0  | 0 | Not-determined | Genome-fragment | NA    | 0    |
| S12_extracted_k141_48027  | 1071  | No  | NA    | 0  | 1 | Not-determined | Genome-fragment | NA    | 0    |
| S12_extracted_k141_110917 | 1251  | No  | NA    | 0  | 2 | Not-determined | Genome-fragment | NA    | 0    |
| S13_extracted_13140       | 3695  | No  | NA    | 0  | 0 | Low-quality    | Genome-fragment | 3.37  | 0    |
| S12_extracted_k141_103494 | 2215  | No  | NA    | 0  | 1 | Not-determined | Genome-fragment | NA    | 0    |
| S12_extracted_k141_119095 | 1259  | No  | NA    | 0  | 1 | Not-determined | Genome-fragment | NA    | 0    |
| S12_extracted_k141_182204 | 1320  | No  | NA    | 0  | 0 | Not-determined | Genome-fragment | NA    | 0    |
| S12_extracted_k141_16571  | 1684  | No  | NA    | 0  | 1 | Not-determined | Genome-fragment | NA    | 0    |
| S12_extracted_k141_150569 | 1546  | No  | NA    | 0  | 1 | Not-determined | Genome-fragment | NA    | 0    |
| S12_extracted_k141_95518  | 6188  | No  | NA    | 0  | 4 | Not-determined | Genome-fragment | NA    | 0    |
| S12_extracted_k141_110943 | 1805  | No  | NA    | 0  | 3 | Not-determined | Genome-fragment | NA    | 0    |
| S12_extracted_k141_174052 | 1005  | No  | NA    | 0  | 1 | Not-determined | Genome-fragment | NA    | 0    |
| S12_extracted_k141_174065 | 1646  | No  | NA    | 0  | 0 | Not-determined | Genome-fragment | NA    | 0    |
| S12_extracted_k141_24640  | 1027  | No  | NA    | 0  | 1 | Not-determined | Genome-fragment | NA    | 0    |
| S12_extracted_k141_79650  | 1152  | No  | NA    | 0  | 0 | Not-determined | Genome-fragment | NA    | 0    |
| S12_extracted_k141_182242 | 3264  | No  | NA    | 0  | 1 | Not-determined | Genome-fragment | NA    | 0    |
| S12_extracted_k141_71835  | 11874 | No  | NA    | 0  | 6 | Not-determined | Genome-fragment | NA    | 0    |
| S12_extracted_k141_134674 | 5734  | No  | NA    | 0  | 1 | Not-determined | Genome-fragment | NA    | 0    |
| S12_extracted_k141_56227  | 1181  | No  | NA    | 0  | 1 | Not-determined | Genome-fragment | NA    | 0    |
| S12_extracted_k141_64153  | 3320  | No  | NA    | 0  | 3 | Not-determined | Genome-fragment | NA    | 0    |
| S14_vs_k141_71859  full   | 3695  | No  | NA    | 0  | 0 | Low-quality    | Genome-fragment | 10.86 | 0    |
| S12_extracted_k141_119125 | 1301  | No  | NA    | 0  | 1 | Not-determined | Genome-fragment | NA    | 0    |
| S16_vs_103252  full       | 3695  | No  | NA    | 0  | 3 | Low-quality    | Genome-fragment | 2.61  | 0    |
| S8_extracted_k141_105323  | 3695  | No  | NA    | 0  | 1 | Low-quality    | Genome-fragment | 1.99  | 0    |
| S12_extracted_k141_87871  | 1553  | No  | NA    | 0  | 1 | Not-determined | Genome-fragment | NA    | 0    |
| S12_extracted_k141_182271 | 1082  | No  | NA    | 0  | 0 | Not-determined | Genome-fragment | NA    | 0    |
| S12_extracted_k141_8778   | 3535  | No  | NA    | 0  | 2 | Not-determined | Genome-fragment | NA    | 0    |
| S12_extracted_k141_142872 | 2883  | No  | NA    | 0  | 1 | Not-determined | Genome-fragment | NA    | 0    |
| S12_extracted_k141_134681 | 2045  | No  | NA    | 0  | 0 | Not-determined | Genome-fragment | NA    | 0    |
| S12_extracted_k141_87658  | 1001  | No  | NA    | 0  | 1 | Not-determined | Genome-fragment | NA    | 0    |
| S12_extracted_k141_40481  | 1134  | No  | NA    | 0  | 0 | Not-determined | Genome-fragment | NA    | 0    |
| S12_extracted_k141_71802  | 1871  | No  | NA    | 0  | 1 | Not-determined | Genome-fragment | NA    | 0    |
| S12_extracted_k141_174120 | 2210  | No  | NA    | 0  | 2 | Not-determined | Genome-fragment | NA    | 0    |
| S12_extracted_k141_48083  | 1094  | No  | NA    | 0  | 2 | Not-determined | Genome-fragment | NA    | 0    |
| S12_extracted_k141_79666  | 46218 | No  | NA    | 13 | 1 | High-quality   | High-quality    | 100   | 0    |
| S12_extracted_k141_87684  | 1439  | No  | NA    | 0  | 2 | Not-determined | Genome-fragment | NA    | 0    |
| S12_extracted_k141_79676  | 5590  | No  | NA    | 0  | 1 | Not-determined | Genome-fragment | NA    | 0    |
| S13_extracted_82574       | 3696  | No  | NA    | 0  | 0 | Low-quality    | Genome-fragment | 8.53  | 0    |
| S12_extracted_k141_134695 | 1674  | No  | NA    | 0  | 0 | Not-determined | Genome-fragment | NA    | 0    |
| S12_extracted_k141_56295  | 1013  | No  | NA    | 0  | 0 | Not-determined | Genome-fragment | NA    | 0    |
| S12_extracted_k141_24751  | 1117  | No  | NA    | 0  | 1 | Not-determined | Genome-fragment | NA    | 0    |
| S5_vs_k141_5161  full     | 3696  | No  | NA    | 0  | 1 | Low-quality    | Genome-fragment | 9.18  | 0    |
| S7_vs_136538  full        | 3696  | No  | NA    | 0  | 3 | Low-quality    | Genome-fragment | 1.64  | 0    |
| S12_extracted_k141_119240 | 2925  | No  | NA    | 0  | 1 | Not-determined | Genome-fragment | NA    | 0    |
| S12_extracted_k141_56321  | 1547  | No  | NA    | 0  | 1 | Not-determined | Genome-fragment | NA    | 0    |
| S12_extracted_k141_40561  | 1750  | No  | NA    | 0  | 1 | Not-determined | Genome-fragment | NA    | 0    |
| S16_vs_90571  full        | 3696  | No  | NA    | 0  | 2 | Low-quality    | Genome-fragment | 2.12  | 0    |
| S12_extracted_k141_79717  | 2321  | No  | NA    | 0  | 4 | Not-determined | Genome-fragment | NA    | 0    |
| S17_vs_k141_32429  full   | 3698  | No  | NA    | 2  | 0 | Low-quality    | Genome-fragment | 6.88  | 0    |
| S16_extracted_18532       | 3698  | No  | NA    | 0  | 1 | Low-quality    | Genome-fragment | 6.07  | 0    |
| S12_extracted_k141_32489  | 1151  | No  | NA    | 0  | 1 | Not-determined | Genome-fragment | NA    | 0    |
| S10_extracted_64783       | 3698  | No  | NA    | 0  | 1 | Low-quality    | Genome-fragment | 1.26  | 0    |
| S12_extracted_k141_142891 | 1281  | No  | NA    | 0  | 0 | Not-determined | Genome-fragment | NA    | 0    |
| S12_extracted_k141_79726  | 5253  | No  | NA    | 0  | 3 | Not-determined | Genome-fragment | NA    | 0    |
| S12_extracted_k141_79739  | 3879  | No  | NA    | 0  | 3 | Not-determined | Genome-fragment | NA    | 0    |
| S12_extracted_k141_71960  | 30634 | No  | NA    | 0  | 4 | Not-determined | Genome-fragment | NA    | 0    |
| S12_extracted_k141_111130 | 1320  | No  | NA    | 0  | 1 | Not-determined | Genome-fragment | NA    | 0    |
| S12_extracted_k141_142916 | 2959  | No  | NA    | 0  | 1 | Not-determined | Genome-fragment | NA    | 0    |
| S12_extracted_k141_174220 | 2173  | No  | NA    | 0  | 0 | Not-determined | Genome-fragment | NA    | 0    |
| S12_extracted_k141_79772  | 1130  | No  | NA    | 0  | 1 | Not-determined | Genome-fragment | NA    | 0    |
| S17_extracted_k141_53580  | 3699  | No  | NA    | 0  | 0 | Low-quality    | Genome-fragment | 2.06  | 0    |
| S12_extracted_k141_95758  | 3453  | No  | NA    | 0  | 2 | Not-determined | Genome-fragment | NA    | 0    |
| S5_extracted_k141_40500   | 3699  | No  | NA    | 0  | 2 | Low-quality    | Genome-fragment | 1     | 0    |
| S12_extracted_k141_111153 | 1320  | No  | NA    | 0  | 1 | Not-determined | Genome-fragment | NA    | 0    |
| S12_extracted_k141_127112 | 3052  | No  | NA    | 0  | 0 | Not-determined | Genome-fragment | NA    | 0    |
| S12_extracted_k141_87835  | 1099  | No  | NA    | 0  | 0 | Not-determined | Genome-fragment | NA    | 0    |
| S12_extracted_k141_166592 | 1680  | No  | NA    | 0  | 1 | Not-determined | Genome-fragment | NA    | 0    |
| S12_extracted_k141_87851  | 1063  | No  | NA    | 0  | 0 | Not-determined | Genome-fragment | NA    | 0    |
| S17_extracted_k141_10183  | 3700  | No  | NA    | 3  | 0 | Low-quality    | Genome-fragment | 11.67 | 0    |
| S12_extracted_k141_119347 | 1678  | No  | NA    | 0  | 0 | Not-determined | Genome-fragment | NA    | 0    |
| S12_extracted_k141_166616 | 1267  | No  | NA    | 0  | 1 | Not-determined | Genome-fragment | NA    | 0    |
| S10_extracted_13192       | 3701  | No  | NA    | 1  | 0 | Low-quality    | Genome-fragment | 2.27  | 0    |
| S12_extracted_k141_150671 | 1038  | No  | NA    | 0  | 1 | Not-determined | Genome-fragment | NA    | 0    |
| S17_extracted_k141_97824  | 3702  | No  | NA    | 1  | 0 | Low-quality    | Genome-fragment | 5.55  | 0    |
| S12_extracted_k141_40674  | 1099  | No  | NA    | 0  | 1 | Not-determined | Genome-fragment | NA    | 0    |
| S12_extracted_k141_8967   | 1468  | No  | NA    | 0  | 2 | Not-determined | Genome-fragment | NA    | 0    |
| S12_extracted_k141_64363  | 1086  | No  | NA    | 0  | 1 | Not-determined | Genome-fragment | NA    | 0    |
| S7_extracted_89534        | 3703  | No  |       |    |   |                |                 |       |      |



|                           |        |     |    |    |    |                |                 |       |       |
|---------------------------|--------|-----|----|----|----|----------------|-----------------|-------|-------|
| S12_extracted_k141_119466 | 2217   | No  | NA | 0  | 1  | Not-determined | Genome-fragment | NA    | 0     |
| S12_extracted_k141_135038 | 1153   | No  | NA | 0  | 0  | Not-determined | Genome-fragment | NA    | 0     |
| S12_extracted_k141_64462  | 2177   | No  | NA | 0  | 1  | Not-determined | Genome-fragment | NA    | 0     |
| S12_extracted_k141_150744 | 4123   | No  | NA | 0  | 1  | Not-determined | Genome-fragment | NA    | 0     |
| S12_extracted_k141_88073  | 1194   | No  | NA | 0  | 1  | Not-determined | Genome-fragment | NA    | 0     |
| S12_extracted_k141_16989  | 5583   | No  | NA | 0  | 2  | Not-determined | Genome-fragment | NA    | 0     |
| S12_extracted_k141_64475  | 3999   | No  | NA | 0  | 1  | Not-determined | Genome-fragment | NA    | 0     |
| S12_extracted_k141_88083  | 5112   | No  | NA | 0  | 1  | Not-determined | Genome-fragment | NA    | 0     |
| S12_extracted_k141_150767 | 1074   | No  | NA | 0  | 1  | Not-determined | Genome-fragment | NA    | 0     |
| S12_extracted_k141_17008  | 1396   | No  | NA | 0  | 2  | Not-determined | Genome-fragment | NA    | 0     |
| S12_extracted_k141_103747 | 1909   | No  | NA | 0  | 0  | Not-determined | Genome-fragment | NA    | 0     |
| S12_extracted_k141_119512 | 1540   | No  | NA | 0  | 0  | Not-determined | Genome-fragment | NA    | 0     |
| S13_extracted_21287       | 3705   | No  | NA | 2  | 0  | Low-quality    | Genome-fragment | 2.06  | 0     |
| S12_extracted_k141_32615  | 174902 | No  | NA | 32 | 4  | Complete       | High-quality    | 100   | 0     |
| S12_extracted_k141_103754 | 1681   | No  | NA | 0  | 0  | Not-determined | Genome-fragment | NA    | 0     |
| S12_extracted_k141_95971  | 3099   | No  | NA | 0  | 2  | Not-determined | Genome-fragment | NA    | 0     |
| S12_extracted_k141_95972  | 1143   | No  | NA | 0  | 0  | Not-determined | Genome-fragment | NA    | 0     |
| S12_extracted_k141_79932  | 2477   | No  | NA | 0  | 2  | Not-determined | Genome-fragment | NA    | 0     |
| S14_vs_k141_58266[full]   | 3705   | No  | NA | 0  | 0  | Low-quality    | Genome-fragment | 7.42  | 0     |
| S12_extracted_k141_103760 | 1304   | No  | NA | 0  | 2  | Not-determined | Genome-fragment | NA    | 0     |
| S12_extracted_k141_135070 | 2513   | No  | NA | 0  | 2  | Not-determined | Genome-fragment | NA    | 0     |
| S12_extracted_k141_135074 | 3458   | No  | NA | 0  | 2  | Not-determined | Genome-fragment | NA    | 0     |
| S12_extracted_k141_103763 | 1602   | No  | NA | 0  | 1  | Not-determined | Genome-fragment | NA    | 0     |
| S12_extracted_k141_9125   | 10677  | No  | NA | 0  | 2  | Not-determined | Genome-fragment | NA    | 0     |
| S12_extracted_k141_25100  | 1354   | No  | NA | 0  | 1  | Not-determined | Genome-fragment | NA    | 0     |
| S12_extracted_k141_1517   | 3168   | No  | NA | 0  | 2  | Not-determined | Genome-fragment | NA    | 0     |
| S12_extracted_k141_174365 | 1439   | No  | NA | 0  | 0  | Not-determined | Genome-fragment | NA    | 0     |
| S12_extracted_k141_119567 | 1153   | No  | NA | 0  | 1  | Not-determined | Genome-fragment | NA    | 0     |
| S12_extracted_k141_7332   | 2039   | No  | NA | 0  | 2  | Not-determined | Genome-fragment | NA    | 0     |
| S12_extracted_k141_56669  | 4389   | No  | NA | 0  | 0  | Not-determined | Genome-fragment | NA    | 0     |
| S12_extracted_k141_64527  | 1012   | No  | NA | 0  | 1  | Not-determined | Genome-fragment | NA    | 0     |
| S12_extracted_k141_119584 | 1098   | No  | NA | 0  | 2  | Not-determined | Genome-fragment | NA    | 0     |
| S1_extracted_k141_2724    | 3706   | No  | NA | 0  | 0  | Low-quality    | Genome-fragment | 5.36  | 0     |
| S12_extracted_k141_1552   | 1512   | No  | NA | 0  | 1  | Not-determined | Genome-fragment | NA    | 0     |
| S12_extracted_k141_96055  | 2215   | No  | NA | 0  | 0  | Not-determined | Genome-fragment | NA    | 0     |
| S12_extracted_k141_5188   | 1311   | No  | NA | 0  | 1  | Not-determined | Genome-fragment | NA    | 0     |
| S12_extracted_k141_56695  | 1104   | No  | NA | 0  | 2  | Not-determined | Genome-fragment | NA    | 0     |
| S12_extracted_k141_119607 | 2538   | No  | NA | 0  | 2  | Not-determined | Genome-fragment | NA    | 0     |
| S12_extracted_k141_103800 | 1272   | No  | NA | 0  | 1  | Not-determined | Genome-fragment | NA    | 0     |
| S10_extracted_16938       | 3706   | No  | NA | 2  | 0  | Low-quality    | Genome-fragment | 1.62  | 0     |
| S12_extracted_k141_135143 | 1400   | No  | NA | 0  | 2  | Not-determined | Genome-fragment | NA    | 0     |
| S15_vs_k141_16621[full]   | 3706   | No  | NA | 0  | 0  | Low-quality    | Genome-fragment | 4.04  | 0     |
| S12_extracted_k141_72377  | 1343   | No  | NA | 0  | 0  | Not-determined | Genome-fragment | NA    | 0     |
| S12_vs_k141_131164[full]  | 3707   | No  | NA | 0  | 1  | Low-quality    | Genome-fragment | 7.8   | 0     |
| S12_extracted_k141_174374 | 40225  | No  | NA | 8  | 1  | High-quality   | High-quality    | 99.22 | 0     |
| S12_extracted_k141_166923 | 1014   | No  | NA | 0  | 2  | Not-determined | Genome-fragment | NA    | 0     |
| S12_extracted_k141_25179  | 1049   | No  | NA | 0  | 1  | Not-determined | Genome-fragment | NA    | 0     |
| S12_extracted_k141_96066  | 3717   | No  | NA | 0  | 4  | Not-determined | Genome-fragment | NA    | 0     |
| S12_extracted_k141_166936 | 1660   | No  | NA | 0  | 0  | Not-determined | Genome-fragment | NA    | 0     |
| S12_extracted_k141_143212 | 1766   | No  | NA | 0  | 0  | Not-determined | Genome-fragment | NA    | 0     |
| S12_extracted_k141_103833 | 3450   | No  | NA | 0  | 0  | Not-determined | Genome-fragment | NA    | 0     |
| S12_extracted_k141_166952 | 1924   | No  | NA | 0  | 0  | Not-determined | Genome-fragment | NA    | 0     |
| S12_extracted_k141_182634 | 7102   | No  | NA | 0  | 0  | Not-determined | Genome-fragment | NA    | 0     |
| S12_extracted_k141_9241   | 1572   | No  | NA | 0  | 5  | Not-determined | Genome-fragment | NA    | 0     |
| S14_extracted_k141_56882  | 3708   | No  | NA | 2  | 0  | Low-quality    | Genome-fragment | 3.16  | 0     |
| S12_extracted_k141_166967 | 1265   | No  | NA | 0  | 0  | Not-determined | Genome-fragment | NA    | 0     |
| S5_vs_k141_88477[full]    | 3708   | No  | NA | 3  | 0  | Low-quality    | Genome-fragment | 8.62  | 0     |
| S12_extracted_k141_182688 | 1819   | No  | NA | 0  | 2  | Not-determined | Genome-fragment | NA    | 0     |
| S16_vs_k141_60481[full]   | 3708   | No  | NA | 0  | 1  | Low-quality    | Genome-fragment | 2.16  | 0     |
| S12_extracted_k141_56768  | 11819  | No  | NA | 0  | 10 | Not-determined | Genome-fragment | NA    | 0     |
| S12_extracted_k141_40766  | 1894   | No  | NA | 0  | 0  | Not-determined | Genome-fragment | NA    | 0     |
| S12_extracted_k141_127480 | 1062   | No  | NA | 0  | 2  | Not-determined | Genome-fragment | NA    | 0     |
| S16_vs_k141_63699[full]   | 3708   | No  | NA | 0  | 3  | Low-quality    | Genome-fragment | 4.19  | 0     |
| S12_extracted_k141_150943 | 1306   | No  | NA | 0  | 0  | Not-determined | Genome-fragment | NA    | 0     |
| S12_extracted_k141_48308  | 8941   | No  | NA | 0  | 1  | Not-determined | Genome-fragment | NA    | 0     |
| S3_vs_k141_51342[full]    | 3709   | No  | NA | 0  | 1  | Low-quality    | Genome-fragment | 5.93  | 0     |
| S12_extracted_k141_127501 | 3508   | No  | NA | 0  | 3  | Not-determined | Genome-fragment | NA    | 0     |
| S12_extracted_k141_127504 | 1202   | No  | NA | 0  | 0  | Not-determined | Genome-fragment | NA    | 0     |
| S12_vs_k141_52102[full]   | 3710   | No  | NA | 0  | 0  | Low-quality    | Genome-fragment | 8.57  | 0     |
| S12_extracted_k141_64682  | 1173   | No  | NA | 0  | 1  | Not-determined | Genome-fragment | NA    | 0     |
| S12_extracted_k141_113455 | 1445   | No  | NA | 0  | 1  | Not-determined | Genome-fragment | NA    | 0     |
| S11_vs_k141_26189[full]   | 3710   | No  | NA | 0  | 0  | Low-quality    | Genome-fragment | 10.02 | 0     |
| S12_extracted_k141_143307 | 1368   | No  | NA | 0  | 0  | Not-determined | Genome-fragment | NA    | 0     |
| S12_extracted_k141_56424  | 1006   | No  | NA | 0  | 0  | Not-determined | Genome-fragment | NA    | 0     |
| S12_extracted_k141_25242  | 1070   | No  | NA | 0  | 2  | Not-determined | Genome-fragment | NA    | 0     |
| S12_extracted_k141_64714  | 5148   | No  | NA | 0  | 8  | Not-determined | Genome-fragment | NA    | 0     |
| S12_extracted_k141_103957 | 1220   | No  | NA | 0  | 1  | Not-determined | Genome-fragment | NA    | 0     |
| S12_extracted_k141_85840  | 1278   | No  | NA | 0  | 2  | Not-determined | Genome-fragment | NA    | 0     |
| S3_extracted_k141_85809   | 3710   | No  | NA | 0  | 0  | Not-determined | Genome-fragment | NA    | 3.27  |
| S12_extracted_k141_25272  | 2023   | No  | NA | 0  | 1  | Not-determined | Genome-fragment | NA    | 0     |
| S16_extracted_165882      | 3710   | No  | NA | 0  | 4  | Low-quality    | Genome-fragment | 3.32  | 0     |
| S12_extracted_k141_152882 | 1247   | No  | NA | 0  | 1  | Not-determined | Genome-fragment | NA    | 0     |
| S1_extracted_k141_33164   | 3711   | No  | NA | 0  | 1  | Low-quality    | Genome-fragment | 2.62  | 0     |
| S12_extracted_k141_17196  | 1306   | No  | NA | 0  | 1  | Not-determined | Genome-fragment | NA    | 0     |
| S12_extracted_k141_127504 | 1038   | No  | NA | 0  | 0  | Not-determined | Genome-fragment | NA    | 0     |
| S12_extracted_k141_96301  | 14590  | No  | NA | 0  | 6  | Not-determined | Genome-fragment | NA    | 0     |
| S3_extracted_k141_97177   | 3711   | No  | NA | 2  | 0  | Low-quality    | Genome-fragment | 2.42  | 0     |
| S12_extracted_k141_115150 | 1333   | No  | NA | 0  | 1  | Not-determined | Genome-fragment | NA    | 0     |
| S12_extracted_k141_115893 | 1175   | No  | NA | 0  | 0  | Not-determined | Genome-fragment | NA    | 0     |
| S12_extracted_k141_104023 | 3548   | No  | NA | 0  | 1  | Not-determined | Genome-fragment | NA    | 0     |
| S12_extracted_k141_25227  | 4423   | No  | NA | 0  | 0  | Not-determined | Genome-fragment | NA    | 0     |
| S12_extracted_k141_96358  | 4023   | No  | NA | 0  | 0  | Not-determined | Genome-fragment | NA    | 0     |
| S12_extracted_k141_1828   | 2786   | No  | NA | 0  | 1  | Not-determined | Genome-fragment | NA    | 0     |
| S12_extracted_k141_119932 | 3299   | No  | NA | 0  | 0  | Not-determined | Genome-fragment | NA    | 0     |
| S5_extracted_k141_51765   | 3711   | No  | NA | 0  | 0  | Low-quality    | Genome-fragment | 9.33  | 0     |
| S12_extracted_k141_1837   | 1536   | No  | NA | 0  | 0  | Not-determined | Genome-fragment | NA    | 0     |
| S12_extracted_k141_40908  | 3067   | No  | NA | 0  | 2  | Not-determined | Genome-fragment | NA    | 0     |
| S12_extracted_k141_182780 | 1294   | No  | NA | 0  | 2  | Not-determined | Genome-fragment | NA    | 0     |
| S16_extracted_48214       | 3711   | Yes | NA | 0  | 1  | Low-quality    | Genome-fragment | 0.47  | 78.07 |
| S12_extracted_k141_56986  | 4814   | No  | NA | 0  | 4  | Not-determined | Genome-fragment | NA    | 0     |
| S12_extracted_k141_135139 | 1207   | No  | NA | 0  | 1  | Not-determined | Genome-fragment | NA    | 0     |
| S6_vs_k141_20252[full]    | 3711   | No  | NA | 0  | 0  | Low-quality    | Genome-fragment | 6.38  | 0     |
| S5_extracted_k141_67757   | 3712   | No  | NA | 0  | 1  | Low-quality    | Genome-fragment | 6.11  | 0     |
| S5_vs_k141_72867[full]    | 3712   | No  | NA | 0  | 2  | Low-quality    | Genome-fragment | 5.04  | 0     |
| S12_extracted_k141_40935  | 1665   | No  | NA | 0  | 0  | Not-determined | Genome-fragment | NA    | 0     |
| S12_extracted_k141_48458  | 1942   | No  | NA | 0  | 1  | Not-determined | Genome-fragment | NA    | 0     |
| S12_extracted_k141_104114 | 2412   | No  | NA | 0  | 2  | Not-determined | Genome-fragment | NA    | 0     |
| S12_extracted_k141_88301  | 2392   | No  | NA | 0  | 1  | Not-determined | Genome-fragment | NA    | 0     |
| S12_extracted_k141_120019 | 1243   | No  | NA | 0  | 1  | Not-determined | Genome-fragment | NA    | 0     |
| S12_extracted_k141_182811 | 1043   | No  | NA | 0  | 1  | Not-determined | Genome-fragment | NA    | 0     |
| S12_extracted_k141_88316  | 1776   | No  | NA | 0  | 0  | Not-determined | Genome-fragment | NA    | 0     |
| S12_extracted_k141_17274  | 2207   | No  | NA | 0  | 12 | Not-determined | Genome-fragment | NA    | 0     |
| S7_extracted_17417        | 3712   | No  | NA | 0  | 1  | Low-quality    | Genome-fragment | 3.37  | 0     |
| S12_extracted_k141_1873   | 4451   | No  | NA | 0  | 2  | Not-determined | Genome-fragment | NA    | 0     |
| S16_extracted_21842       | 3714   | No  | NA | 0  | 0  | Low-quality    | Genome-fragment | 6.4   | 0     |
| S12_extracted_k141_182826 | 3230   | No  | NA | 0  | 2  | Not-determined | Genome-fragment | NA    | 0     |
| S12_extracted_k141_80097  | 1554   | No  | NA | 0  | 1  | Not-determined | Genome-fragment | NA    | 0     |
| S12_extracted_k141_10101  | 2196   | No  | NA | 0  | 0  | Not-determined | Genome-fragment | NA    | 0     |
| S16_extracted_26985       | 3714   | No  | NA | 0  | 0  | Low-quality    | Genome-fragment | 7.82  | 0     |
| S12_extracted_k141_48480  | 4566   | No  | NA | 0  | 1  | Not-determined | Genome-fragment | NA    | 0     |
| S12_extracted_k141_120071 | 1015   | No  | NA | 0  | 1  | Not-determined | Genome-fragment | NA    | 0     |
| S12_extracted_k141_127656 | 2081   | No  | NA | 0  | 0  | Not-determined | Genome-fragment | NA    | 0     |
| S12_extracted_k141_104174 | 1024   | No  | NA | 0  | 2  | Not-determined | Genome-fragment | NA    | 0     |
| S12_extracted_k141_1501   | 3248   | No  | NA | 0  | 2  | Not-determined | Genome-fragment | NA    | 0     |
| S12_vs_k141_21475[full]   | 3714   | No  | NA | 0  | 1  | Low-quality    | Genome-fragment | 0.64  | 0     |
| S12_extracted_k141_151037 | 1428   | No  | NA | 0  | 2  | Not-determined | Genome-fragment | NA    | 0     |
| S12_extracted_k141_104182 | 1536   | No  | NA | 0  | 1  | Not-determined | Genome-fragment | NA    | 0     |
| S12_extracted_k141_88382  | 1477   | No  | NA | 0  | 1  | Not-determined | Genome-fragment | NA    | 0     |
| S12_extracted_k141_111676 | 2408   | No  | NA | 0  | 0  | Not-determined | Genome-fragment | NA    | 0     |
| S17_extracted_k141_116855 | 3716   | No  | NA | 3  | 0  | Low-quality    | Genome-fragment | 2.16  | 0     |
| S12_extracted_k141_104192 | 3712   | No  | NA | 0  | 3  | Not-determined | Genome-fragment | NA    | 0     |
| S3_vs_k141_106330[full]   | 3717   | No  | NA | 1  | 0  | Low-quality    | Genome-fragment | 2.21  | 0     |
| S12_extracted_k141_32751  | 1138   | No  | NA | 0  | 0  | Not-determined | Genome-fragment | NA    | 0     |
| S12_extracted_k141_104207 | 1052   | No  | NA | 0  | 1  | Not-determined | Genome-fragment | NA    | 0     |
| S12_extracted_k141_182844 | 35312  | No  | NA | 0  | 20 | Not-determined | Genome-fragment | NA    | 0     |
| S12_extracted_k141_57111  | 1207   | No  | NA | 0  | 1  | Not-determined | Genome-fragment | NA    | 0     |
| S12_extracted_k141_1539   | 3804   | No  | NA | 0  | 2  | Not-determined | Genome-fragment | NA    | 0     |
| S12_extracted_k141_101075 | 6427   | No  | NA | 0  | 1  | Not-determined | Genome-fragment | NA    | 0     |
| S12_extracted_k141_88397  | 1158   | No  | NA | 0  | 4  | Not-determined | Genome-fragment | NA    | 0     |
| S12_extracted_k141_9403   | 1304   | No  | NA | 0  | 2  | Not-determined | Genome-fragment | NA    | 0     |
| S3_extracted_k141_87088   | 3719   | No  | NA | 2  | 0  | Low-quality    | Genome-fragment | 6.2   | 0     |
| S12_extracted_k141_127707 | 1627   | No  | NA | 0  | 2  | Not-determined | Genome-fragment | NA    | 0     |
| S12_extracted_k141_1958   | 5980   | No  | NA | 0  | 0  | Not-determined | Genome-fragment | NA    | 0     |
| S12_extracted_k141_88432  | 1209   | No  | NA | 0  | 1  | Not-determined | Genome-fragment | NA    | 0     |
| S9_vs_k141_65910[full]    | 37     |     |    |    |    |                |                 |       |       |



|                            |       |    |    |   |   |                |                 |       |   |
|----------------------------|-------|----|----|---|---|----------------|-----------------|-------|---|
| S12_extracted_k141_41244   | 1033  | No | NA | 0 | 1 | Not-determined | Genome-fragment | NA    | 0 |
| S12_extracted_k141_104164  | 3004  | No | NA | 0 | 1 | Not-determined | Genome-fragment | NA    | 0 |
| S12_extracted_k141_88594   | 1514  | No | NA | 0 | 1 | Not-determined | Genome-fragment | NA    | 0 |
| S12_extracted_k141_183022  | 1215  | No | NA | 0 | 1 | Not-determined | Genome-fragment | NA    | 0 |
| S12_extracted_k141_135518  | 1285  | No | NA | 0 | 1 | Not-determined | Genome-fragment | NA    | 0 |
| S12_extracted_k141_1355120 | 6185  | No | NA | 0 | 1 | Not-determined | Genome-fragment | NA    | 0 |
| S12_extracted_k141_32875   | 1217  | No | NA | 0 | 0 | Not-determined | Genome-fragment | NA    | 0 |
| S12_extracted_k141_120229  | 1024  | No | NA | 0 | 1 | Not-determined | Genome-fragment | NA    | 0 |
| S14_extracted_k141_9366    | 3721  | No | NA | 0 | 0 | Low-quality    | Genome-fragment | 7.99  | 0 |
| S12_extracted_k141_183030  | 1521  | No | NA | 0 | 2 | Not-determined | Genome-fragment | NA    | 0 |
| S12_extracted_k141_120234  | 2302  | No | NA | 0 | 1 | Not-determined | Genome-fragment | NA    | 0 |
| S12_extracted_k141_48685   | 32299 | No | NA | 0 | 1 | Not-determined | Genome-fragment | NA    | 0 |
| S12_extracted_k141_143726  | 3345  | No | NA | 0 | 2 | Not-determined | Genome-fragment | NA    | 0 |
| S12_extracted_k141_96736   | 1150  | No | NA | 0 | 2 | Not-determined | Genome-fragment | NA    | 0 |
| S12_extracted_k141_15662   | 4859  | No | NA | 0 | 1 | Not-determined | Genome-fragment | NA    | 0 |
| S12_extracted_k141_1355146 | 1241  | No | NA | 0 | 1 | Not-determined | Genome-fragment | NA    | 0 |
| S12_extracted_k141_41337   | 1192  | No | NA | 0 | 1 | Not-determined | Genome-fragment | NA    | 0 |
| S12_extracted_k141_80304   | 1451  | No | NA | 0 | 1 | Not-determined | Genome-fragment | NA    | 0 |
| S12_extracted_k141_143737  | 1006  | No | NA | 0 | 0 | Not-determined | Genome-fragment | NA    | 0 |
| S12_extracted_k141_48717   | 1910  | No | NA | 0 | 2 | Not-determined | Genome-fragment | NA    | 0 |
| S12_extracted_k141_143745  | 1801  | No | NA | 0 | 1 | Not-determined | Genome-fragment | NA    | 0 |
| S12_extracted_k141_183097  | 1368  | No | NA | 0 | 1 | Not-determined | Genome-fragment | NA    | 0 |
| S12_extracted_k141_41353   | 5452  | No | NA | 0 | 0 | Not-determined | Genome-fragment | NA    | 0 |
| S12_extracted_k141_104413  | 1145  | No | NA | 0 | 0 | Not-determined | Genome-fragment | NA    | 0 |
| S12_extracted_k141_174625  | 2445  | No | NA | 0 | 0 | Not-determined | Genome-fragment | NA    | 0 |
| S12_extracted_k141_150300  | 2674  | No | NA | 0 | 1 | Not-determined | Genome-fragment | NA    | 0 |
| S5_extracted_k141_139506   | 3721  | No | NA | 2 | 0 | Low-quality    | Genome-fragment | 9.2   | 0 |
| S12_extracted_k141_80342   | 3811  | No | NA | 0 | 5 | Not-determined | Genome-fragment | NA    | 0 |
| S12_extracted_k141_174644  | 1145  | No | NA | 0 | 0 | Not-determined | Genome-fragment | NA    | 0 |
| S12_extracted_k141_25689   | 3703  | No | NA | 0 | 2 | Not-determined | Genome-fragment | NA    | 0 |
| S12_extracted_k141_167366  | 1041  | No | NA | 0 | 1 | Not-determined | Genome-fragment | NA    | 0 |
| S12_extracted_k141_1437180 | 1125  | No | NA | 0 | 1 | Not-determined | Genome-fragment | NA    | 0 |
| S12_extracted_k141_135573  | 1196  | No | NA | 0 | 0 | Not-determined | Genome-fragment | NA    | 0 |
| S12_extracted_k141_9636    | 1241  | No | NA | 0 | 0 | Not-determined | Genome-fragment | NA    | 0 |
| S12_extracted_k141_104451  | 1117  | No | NA | 0 | 1 | Not-determined | Genome-fragment | NA    | 0 |
| S12_extracted_k141_159075  | 1054  | No | NA | 0 | 0 | Not-determined | Genome-fragment | NA    | 0 |
| S12_extracted_k141_41371   | 3230  | No | NA | 0 | 1 | Not-determined | Genome-fragment | NA    | 0 |
| S12_extracted_k141_104455  | 2192  | No | NA | 0 | 1 | Not-determined | Genome-fragment | NA    | 0 |
| S7_extracted_44611         | 3721  | No | NA | 0 | 0 | Low-quality    | Genome-fragment | 7.44  | 0 |
| S12_extracted_k141_118255  | 3721  | No | NA | 0 | 1 | Low-quality    | Genome-fragment | 5.52  | 0 |
| S12_extracted_k141_151182  | 1020  | No | NA | 0 | 0 | Not-determined | Genome-fragment | NA    | 0 |
| S12_extracted_k141_57386   | 6850  | No | NA | 0 | 0 | Not-determined | Genome-fragment | NA    | 0 |
| S12_extracted_k141_41383   | 3682  | No | NA | 0 | 1 | Not-determined | Genome-fragment | NA    | 0 |
| S12_extracted_k141_151184  | 3794  | No | NA | 0 | 1 | Not-determined | Genome-fragment | NA    | 0 |
| S12_extracted_k141_174684  | 2565  | No | NA | 0 | 1 | Not-determined | Genome-fragment | NA    | 0 |
| S16_extracted_118250       | 3722  | No | NA | 0 | 0 | Low-quality    | Genome-fragment | 2.81  | 0 |
| S12_vs_k141_15921[full]    | 3722  | No | NA | 0 | 1 | Low-quality    | Genome-fragment | 6.42  | 0 |
| S12_extracted_k141_151186  | 1303  | No | NA | 0 | 0 | Not-determined | Genome-fragment | NA    | 0 |
| S8_vs_k141_46211[full]     | 3722  | No | NA | 0 | 0 | Low-quality    | Genome-fragment | 2.5   | 0 |
| S12_extracted_k141_104484  | 1114  | No | NA | 0 | 1 | Not-determined | Genome-fragment | NA    | 0 |
| S12_extracted_k141_80403   | 1265  | No | NA | 0 | 2 | Not-determined | Genome-fragment | NA    | 0 |
| S12_extracted_k141_33017   | 1164  | No | NA | 0 | 1 | Not-determined | Genome-fragment | NA    | 0 |
| S12_extracted_k141_80409   | 1926  | No | NA | 0 | 1 | Not-determined | Genome-fragment | NA    | 0 |
| S12_extracted_k141_57387   | 1913  | No | NA | 0 | 1 | Not-determined | Genome-fragment | NA    | 0 |
| S12_extracted_k141_183164  | 3362  | No | NA | 0 | 2 | Not-determined | Genome-fragment | NA    | 0 |
| S11_extracted_k141_1287    | 3723  | No | NA | 2 | 0 | Low-quality    | Genome-fragment | 8.61  | 0 |
| S12_extracted_k141_104490  | 1350  | No | NA | 0 | 0 | Not-determined | Genome-fragment | NA    | 0 |
| S12_extracted_k141_127894  | 1061  | No | NA | 0 | 0 | Not-determined | Genome-fragment | NA    | 0 |
| S12_extracted_k141_159123  | 1378  | No | NA | 0 | 0 | Not-determined | Genome-fragment | NA    | 0 |
| S12_extracted_k141_183179  | 1932  | No | NA | 0 | 0 | Not-determined | Genome-fragment | NA    | 0 |
| S11_vs_k141_59002[full]    | 3723  | No | NA | 1 | 0 | Low-quality    | Genome-fragment | 9.82  | 0 |
| S8_extracted_k141_80405    | 3723  | No | NA | 0 | 1 | Low-quality    | Genome-fragment | 2.36  | 0 |
| S12_extracted_k141_174730  | 1250  | No | NA | 0 | 1 | Not-determined | Genome-fragment | NA    | 0 |
| S12_extracted_k141_65117   | 21588 | No | NA | 0 | 6 | Not-determined | Genome-fragment | NA    | 0 |
| S12_extracted_k141_1117    | 1342  | No | NA | 0 | 2 | Not-determined | Genome-fragment | NA    | 0 |
| S12_extracted_k141_183190  | 1208  | No | NA | 0 | 2 | Not-determined | Genome-fragment | NA    | 0 |
| S12_extracted_k141_167430  | 1809  | No | NA | 0 | 2 | Not-determined | Genome-fragment | NA    | 0 |
| S12_extracted_k141_13049   | 2573  | No | NA | 0 | 1 | Not-determined | Genome-fragment | NA    | 0 |
| S12_extracted_k141_88781   | 3724  | No | NA | 0 | 1 | Low-quality    | Genome-fragment | 2.04  | 0 |
| S7_vs_102855[full]         | 3724  | No | NA | 3 | 0 | Low-quality    | Genome-fragment | 7.81  | 0 |
| S6_extracted_k141_38174    | 3724  | No | NA | 0 | 0 | Low-quality    | Genome-fragment | 5.11  | 0 |
| S12_extracted_k141_2196    | 1808  | No | NA | 0 | 0 | Not-determined | Genome-fragment | NA    | 0 |
| S12_extracted_k141_111787  | 6989  | No | NA | 0 | 0 | Not-determined | Genome-fragment | NA    | 0 |
| S12_extracted_k141_159158  | 1467  | No | NA | 0 | 1 | Not-determined | Genome-fragment | NA    | 0 |
| S12_extracted_k141_120366  | 1126  | No | NA | 0 | 1 | Not-determined | Genome-fragment | NA    | 0 |
| S12_extracted_k141_33083   | 1314  | No | NA | 0 | 2 | Not-determined | Genome-fragment | NA    | 0 |
| S12_extracted_k141_174782  | 1127  | No | NA | 0 | 0 | Not-determined | Genome-fragment | NA    | 0 |
| S12_extracted_k141_25792   | 1303  | No | NA | 0 | 2 | Not-determined | Genome-fragment | NA    | 0 |
| S12_extracted_k141_65163   | 3413  | No | NA | 0 | 2 | Not-determined | Genome-fragment | NA    | 0 |
| S12_extracted_k141_57430   | 2598  | No | NA | 0 | 1 | Not-determined | Genome-fragment | NA    | 0 |
| S5_vs_k141_15665[full]     | 3725  | No | NA | 2 | 0 | Low-quality    | Genome-fragment | 11.37 | 0 |
| S12_extracted_k141_2216    | 7736  | No | NA | 0 | 0 | Not-determined | Genome-fragment | NA    | 0 |
| S11_vs_k141_30648[full]    | 3727  | No | NA | 0 | 1 | Low-quality    | Genome-fragment | 4.84  | 0 |
| S12_extracted_k141_155712  | 3480  | No | NA | 0 | 2 | Not-determined | Genome-fragment | NA    | 0 |
| S12_extracted_k141_1449    | 3280  | No | NA | 0 | 2 | Not-determined | Genome-fragment | NA    | 0 |
| S6_extracted_k141_19425    | 3728  | No | NA | 0 | 3 | Low-quality    | Genome-fragment | 0.75  | 0 |
| S12_extracted_k141_88806   | 1333  | No | NA | 0 | 0 | Not-determined | Genome-fragment | NA    | 0 |
| S12_extracted_k141_127951  | 1044  | No | NA | 0 | 0 | Not-determined | Genome-fragment | NA    | 0 |
| S12_extracted_k141_143878  | 4344  | No | NA | 0 | 0 | Not-determined | Genome-fragment | NA    | 0 |
| S12_extracted_k141_104518  | 1069  | No | NA | 0 | 2 | Not-determined | Genome-fragment | NA    | 0 |
| S12_extracted_k141_48872   | 1333  | No | NA | 0 | 1 | Not-determined | Genome-fragment | NA    | 0 |
| S12_extracted_k141_96945   | 1017  | No | NA | 0 | 0 | Not-determined | Genome-fragment | NA    | 0 |
| S12_extracted_k141_57475   | 2729  | No | NA | 0 | 1 | Not-determined | Genome-fragment | NA    | 0 |
| S3_extracted_k141_57905    | 3729  | No | NA | 8 | 0 | Low-quality    | Genome-fragment | 8.03  | 0 |
| S12_extracted_k141_65218   | 1419  | No | NA | 0 | 1 | Not-determined | Genome-fragment | NA    | 0 |
| S12_extracted_k141_25850   | 1443  | No | NA | 0 | 1 | Not-determined | Genome-fragment | NA    | 0 |
| S12_extracted_k141_33190   | 1001  | No | NA | 0 | 1 | Not-determined | Genome-fragment | NA    | 0 |
| S12_extracted_k141_13191   | 4593  | No | NA | 0 | 0 | Not-determined | Genome-fragment | NA    | 0 |
| S5_vs_k141_7958[full]      | 3729  | No | NA | 0 | 0 | Low-quality    | Genome-fragment | 6.08  | 0 |
| S12_extracted_k141_80590   | 1212  | No | NA | 0 | 1 | Not-determined | Genome-fragment | NA    | 0 |
| S12_extracted_k141_234     | 1457  | No | NA | 0 | 0 | Not-determined | Genome-fragment | NA    | 0 |
| S12_extracted_k141_135757  | 1055  | No | NA | 0 | 1 | Not-determined | Genome-fragment | NA    | 0 |
| S12_extracted_k141_41595   | 1036  | No | NA | 0 | 0 | Not-determined | Genome-fragment | NA    | 0 |
| S12_extracted_k141_88901   | 3624  | No | NA | 0 | 2 | Not-determined | Genome-fragment | NA    | 0 |
| S12_extracted_k141_17815   | 1364  | No | NA | 0 | 1 | Not-determined | Genome-fragment | NA    | 0 |
| S12_extracted_k141_88909   | 1450  | No | NA | 0 | 1 | Not-determined | Genome-fragment | NA    | 0 |
| S7_vs_21358[full]          | 3729  | No | NA | 3 | 0 | Low-quality    | Genome-fragment | 6.29  | 0 |
| S7_vs_38164[full]          | 3729  | No | NA | 0 | 0 | Low-quality    | Genome-fragment | 3.14  | 0 |
| S12_extracted_k141_151345  | 1746  | No | NA | 0 | 2 | Not-determined | Genome-fragment | NA    | 0 |
| S12_extracted_k141_128039  | 1216  | No | NA | 0 | 0 | Not-determined | Genome-fragment | NA    | 0 |
| S12_extracted_k141_17856   | 5128  | No | NA | 0 | 1 | Not-determined | Genome-fragment | NA    | 0 |
| S12_extracted_k141_80663   | 1035  | No | NA | 0 | 0 | Not-determined | Genome-fragment | NA    | 0 |
| S12_extracted_k141_25898   | 1107  | No | NA | 0 | 1 | Not-determined | Genome-fragment | NA    | 0 |
| S12_extracted_k141_159255  | 1036  | No | NA | 0 | 0 | Not-determined | Genome-fragment | NA    | 0 |
| S8_vs_k141_119279[full]    | 3729  | No | NA | 0 | 0 | Low-quality    | Genome-fragment | 4.58  | 0 |
| S12_extracted_k141_2278    | 1155  | No | NA | 0 | 0 | Not-determined | Genome-fragment | NA    | 0 |
| S17_extracted_k141_41005   | 3730  | No | NA | 0 | 2 | Low-quality    | Genome-fragment | 1.56  | 0 |
| S12_extracted_k141_38933   | 2383  | No | NA | 0 | 1 | Not-determined | Genome-fragment | NA    | 0 |
| S12_extracted_89983        | 3730  | No | NA | 0 | 0 | Low-quality    | Genome-fragment | 3.41  | 0 |
| S12_extracted_k141_183302  | 3311  | No | NA | 0 | 2 | Not-determined | Genome-fragment | NA    | 0 |
| S12_extracted_k141_30707   | 2365  | No | NA | 0 | 2 | Not-determined | Genome-fragment | NA    | 0 |
| S12_extracted_k141_118197  | 4285  | No | NA | 0 | 2 | Not-determined | Genome-fragment | NA    | 0 |
| S12_extracted_k141_88843   | 1146  | No | NA | 0 | 1 | Not-determined | Genome-fragment | NA    | 0 |
| S12_extracted_k141_104566  | 3229  | No | NA | 0 | 0 | Not-determined | Genome-fragment | NA    | 0 |
| S12_vs_66616[full]         | 3731  | No | NA | 0 | 0 | Low-quality    | Genome-fragment | 1.55  | 0 |
| S7_vs_24542[full]          | 3731  | No | NA | 1 | 0 | Low-quality    | Genome-fragment | 9.52  | 0 |
| S12_extracted_k141_120564  | 4202  | No | NA | 0 | 1 | Not-determined | Genome-fragment | NA    | 0 |
| S12_extracted_k141_33263   | 1027  | No | NA | 0 | 1 | Not-determined | Genome-fragment | NA    | 0 |
| S12_extracted_k141_88608   | 1117  | No | NA | 0 | 0 | Not-determined | Genome-fragment | NA    | 0 |
| S12_extracted_k141_33272   | 3249  | No | NA | 0 | 2 | Not-determined | Genome-fragment | NA    | 0 |
| S12_extracted_k141_135864  | 2773  | No | NA | 0 | 0 | Not-determined | Genome-fragment | NA    | 0 |
| S12_extracted_k141_88886   | 1864  | No | NA | 0 | 0 | Not-determined | Genome-fragment | NA    | 0 |
| S12_extracted_k141_144003  | 1298  | No | NA | 0 | 0 | Not-determined | Genome-fragment | NA    | 0 |
| S12_extracted_k141_25924   | 1069  | No | NA | 0 | 0 | Not-determined | Genome-fragment | NA    | 0 |
| S12_extracted_k141_151440  | 2217  | No | NA | 0 | 0 | Not-determined | Genome-fragment | NA    | 0 |
| S12_extracted_k141_183343  | 1005  | No | NA | 0 | 0 | Not-determined | Genome-fragment | NA    | 0 |
| S12_extracted_k141_151444  | 1367  | No | NA | 0 | 1 | Not-determined | Genome-fragment | NA    | 0 |
| S16_vs_143849[full]        | 3731  | No | NA | 1 | 0 | Low-quality    | Genome-fragment | 8.02  | 0 |
| S12_extracted_k141_144023  | 1204  | No | NA | 0 | 1 | Not-determined | Genome-fragment | NA    | 0 |
| S12_extracted_k141_111968  | 1118  | No | NA | 0 | 0 | Not-determined | Genome-fragment | NA    | 0 |
| S12_extracted_k141_65369   | 1124  | No | NA | 0 | 1 | Not-determined | Genome-fragment | NA    | 0 |
| S12_extracted_k141_111972  | 1063  | No | NA | 0 | 1 | Not-determined | Genome-fragment | NA    | 0 |
| S12_extracted_k141_104684  | 3747  | No | NA | 0 | 2 | Not-determined | Genome-fragment | NA    | 0 |
| S12_extracted_k141_89002   | 1494  | No | NA | 0 | 1 | Not-determined | Genome-fragment | NA    | 0 |
| S11_vs_k141_25300[full]    | 3733  | No | NA |   |   |                |                 |       |   |



|                           |       |    |   |    |                |                 |    |       |
|---------------------------|-------|----|---|----|----------------|-----------------|----|-------|
| S12_extracted_k141_65487  | 3019  | NA | 0 | 2  | Not-determined | Genome-fragment | NA | 0     |
| S12_extracted_k141_2434   | 1050  | NA | 0 | 1  | Not-determined | Genome-fragment | NA | 0     |
| S12_extracted_k141_167467 | 2157  | NA | 0 | 1  | Not-determined | Genome-fragment | NA | 0     |
| S12_extracted_k141_49130  | 1360  | NA | 0 | 2  | Not-determined | Genome-fragment | NA | 0     |
| S7_extracted_45639        | 3736  | NA | 0 | 1  | Low-quality    | Genome-fragment | NA | 0.48  |
| S12_extracted_k141_159358 | 7318  | NA | 0 | 2  | Not-determined | Genome-fragment | NA | 0     |
| S12_extracted_k141_26062  | 1337  | NA | 0 | 0  | Not-determined | Genome-fragment | NA | 0     |
| S7_vs_747831[full]        | 3736  | NA | 1 | 0  | Low-quality    | Genome-fragment | NA | 8.54  |
| S12_extracted_k141_104025 | 1232  | NA | 0 | 2  | Not-determined | Genome-fragment | NA | 0     |
| S12_extracted_k141_104827 | 1393  | NA | 0 | 2  | Not-determined | Genome-fragment | NA | 0     |
| S12_extracted_k141_72726  | 2559  | NA | 0 | 2  | Not-determined | Genome-fragment | NA | 0     |
| S8_extracted_k141_45170   | 3736  | NA | 0 | 2  | Low-quality    | Genome-fragment | NA | 11.59 |
| S12_extracted_k141_97318  | 1049  | NA | 2 | 0  | Not-determined | Genome-fragment | NA | 0     |
| S12_extracted_k141_41916  | 1454  | NA | 0 | 0  | Not-determined | Genome-fragment | NA | 0     |
| S12_extracted_k141_89215  | 1113  | NA | 0 | 1  | Not-determined | Genome-fragment | NA | 0     |
| S12_extracted_k141_112151 | 2737  | NA | 0 | 2  | Not-determined | Genome-fragment | NA | 0     |
| S12_extracted_k141_159391 | 3740  | NA | 0 | 1  | Not-determined | Genome-fragment | NA | 0     |
| S12_extracted_k141_72753  | 1341  | NA | 0 | 0  | Not-determined | Genome-fragment | NA | 0     |
| S12_extracted_k141_18051  | 1648  | NA | 0 | 1  | Not-determined | Genome-fragment | NA | 0     |
| S12_extracted_k141_159397 | 3397  | NA | 0 | 0  | Not-determined | Genome-fragment | NA | 0     |
| S12_extracted_k141_167487 | 2206  | NA | 0 | 1  | Not-determined | Genome-fragment | NA | 0     |
| S1_vs_k141_54476[full]    | 3737  | NA | 0 | 1  | Not-determined | Genome-fragment | NA | 7.07  |
| S16_vs_128358[full]       | 3739  | NA | 0 | 0  | Low-quality    | Genome-fragment | NA | 8.64  |
| S12_extracted_k141_183528 | 1266  | NA | 0 | 0  | Not-determined | Genome-fragment | NA | 0     |
| S12_extracted_k141_112185 | 4447  | NA | 0 | 1  | Not-determined | Genome-fragment | NA | 0     |
| S12_extracted_k141_57794  | 1186  | NA | 0 | 2  | Not-determined | Genome-fragment | NA | 0     |
| S12_extracted_k141_104836 | 3050  | NA | 0 | 0  | Not-determined | Genome-fragment | NA | 0     |
| S12_extracted_k141_130533 | 3739  | NA | 0 | 3  | Low-quality    | Genome-fragment | NA | 1.34  |
| S14_vs_k141_55952[full]   | 3741  | NA | 0 | 1  | Low-quality    | Genome-fragment | NA | 1.89  |
| S12_extracted_k141_18105  | 1615  | NA | 0 | 1  | Not-determined | Genome-fragment | NA | 0     |
| S12_extracted_k141_72800  | 1968  | NA | 0 | 0  | Not-determined | Genome-fragment | NA | 0     |
| S12_extracted_k141_159474 | 2525  | NA | 0 | 2  | Not-determined | Genome-fragment | NA | 0     |
| S12_extracted_k141_136143 | 1001  | NA | 0 | 2  | Not-determined | Genome-fragment | NA | 0     |
| S12_extracted_k141_42009  | 1189  | NA | 0 | 1  | Not-determined | Genome-fragment | NA | 0     |
| S7_vs_92787[full]         | 3742  | NA | 2 | 0  | Low-quality    | Genome-fragment | NA | 9.13  |
| S12_extracted_k141_167553 | 1372  | NA | 0 | 1  | Not-determined | Genome-fragment | NA | 0     |
| S12_extracted_k141_72818  | 1314  | NA | 0 | 0  | Not-determined | Genome-fragment | NA | 0     |
| S12_extracted_k141_144260 | 1472  | NA | 0 | 2  | Not-determined | Genome-fragment | NA | 0     |
| S12_extracted_k141_57815  | 1434  | NA | 0 | 3  | Not-determined | Genome-fragment | NA | 0     |
| S12_extracted_k141_97434  | 1909  | NA | 0 | 2  | Not-determined | Genome-fragment | NA | 0     |
| S12_extracted_k141_183585 | 1116  | NA | 0 | 1  | Not-determined | Genome-fragment | NA | 0     |
| S4_extracted_22022        | 3742  | NA | 0 | 0  | Low-quality    | Genome-fragment | NA | 11.15 |
| S16_vs_11043[full]        | 3744  | NA | 0 | 2  | Low-quality    | Genome-fragment | NA | 5.65  |
| S12_extracted_k141_57847  | 1045  | NA | 0 | 1  | Not-determined | Genome-fragment | NA | 0     |
| S12_extracted_k141_26159  | 1868  | NA | 0 | 0  | Not-determined | Genome-fragment | NA | 0     |
| S12_extracted_k141_144279 | 11171 | NA | 0 | 10 | Not-determined | Genome-fragment | NA | 0     |
| S12_extracted_k141_89332  | 1160  | NA | 0 | 0  | Not-determined | Genome-fragment | NA | 0     |
| S12_extracted_k141_13506  | 6905  | NA | 0 | 5  | Not-determined | Genome-fragment | NA | 6.19  |
| S5_vs_k141_62514[full]    | 3745  | NA | 0 | 0  | Low-quality    | Genome-fragment | NA | 9     |
| S13_vs_95131[full]        | 3745  | NA | 2 | 0  | Low-quality    | Genome-fragment | NA | 9     |
| S12_extracted_k141_26187  | 1613  | NA | 0 | 2  | Not-determined | Genome-fragment | NA | 0     |
| S12_extracted_k141_104020 | 2499  | NA | 0 | 2  | Not-determined | Genome-fragment | NA | 0     |
| S6_vs_k141_22003[full]    | 3745  | NA | 0 | 0  | Low-quality    | Genome-fragment | NA | 2.72  |
| S12_extracted_k141_33512  | 7649  | NA | 0 | 2  | Not-determined | Genome-fragment | NA | 0     |
| S12_extracted_k141_79897  | 1354  | NA | 0 | 0  | Not-determined | Genome-fragment | NA | 0     |
| S12_extracted_k141_151641 | 40715 | NA | 0 | 25 | Not-determined | Genome-fragment | NA | 0     |
| S12_extracted_k141_65692  | 3257  | NA | 0 | 1  | Not-determined | Genome-fragment | NA | 0     |
| S12_extracted_k141_72865  | 2948  | NA | 0 | 1  | Not-determined | Genome-fragment | NA | 0     |
| S1_vs_k141_31316[full]    | 3746  | NA | 0 | 2  | Low-quality    | Genome-fragment | NA | 4.36  |
| S5_vs_k141_98383[full]    | 3746  | NA | 4 | 0  | Low-quality    | Genome-fragment | NA | 9.21  |
| S10_vs_32084[full]        | 3746  | NA | 0 | 3  | Low-quality    | Genome-fragment | NA | 10.23 |
| S9_vs_k141_12408[full]    | 3748  | NA | 0 | 0  | Low-quality    | Genome-fragment | NA | 9.5   |
| S12_extracted_k141_42104  | 3669  | NA | 0 | 0  | Not-determined | Genome-fragment | NA | 0     |
| S12_extracted_k141_2675   | 1490  | NA | 0 | 0  | Not-determined | Genome-fragment | NA | 0     |
| S5_extracted_k141_14109   | 3748  | NA | 0 | 0  | Low-quality    | Genome-fragment | NA | 10.2  |
| S12_extracted_k141_9912   | 1037  | NA | 0 | 0  | Not-determined | Genome-fragment | NA | 0     |
| S7_vs_108580[full]        | 3748  | NA | 2 | 0  | Low-quality    | Genome-fragment | NA | 10.47 |
| S12_extracted_k141_144345 | 1025  | NA | 0 | 0  | Not-determined | Genome-fragment | NA | 0     |
| S5_extracted_k141_90101   | 3749  | NA | 0 | 0  | Low-quality    | Genome-fragment | NA | 26.85 |
| S12_extracted_k141_183666 | 1063  | NA | 0 | 1  | Not-determined | Genome-fragment | NA | 0     |
| S12_extracted_k141_49229  | 1031  | NA | 0 | 1  | Not-determined | Genome-fragment | NA | 0     |
| S12_extracted_k141_183693 | 1209  | NA | 0 | 1  | Not-determined | Genome-fragment | NA | 0     |
| S12_extracted_k141_33628  | 3033  | NA | 0 | 1  | Not-determined | Genome-fragment | NA | 0     |
| S5_extracted_k141_27147   | 3749  | NA | 3 | 0  | Low-quality    | Genome-fragment | NA | 8.62  |
| S13_vs_24731[full]        | 3751  | NA | 0 | 0  | Low-quality    | Genome-fragment | NA | 8.95  |
| S12_extracted_k141_72921  | 1028  | NA | 0 | 2  | Not-determined | Genome-fragment | NA | 0     |
| S5_vs_k141_78053[full]    | 3752  | NA | 0 | 3  | Low-quality    | Genome-fragment | NA | 1.99  |
| S12_extracted_k141_112298 | 1343  | NA | 0 | 1  | Not-determined | Genome-fragment | NA | 0     |
| S10_vs_118665[full]       | 3753  | NA | 0 | 0  | Low-quality    | Genome-fragment | NA | 5.57  |
| S12_extracted_k141_49259  | 1742  | NA | 0 | 1  | Not-determined | Genome-fragment | NA | 0     |
| S12_extracted_k141_136324 | 1418  | NA | 0 | 0  | Not-determined | Genome-fragment | NA | 0     |
| S12_extracted_k141_105016 | 2471  | NA | 0 | 0  | Not-determined | Genome-fragment | NA | 0     |
| S12_extracted_k141_128375 | 1287  | NA | 0 | 1  | Not-determined | Genome-fragment | NA | 0     |
| S7_extracted_88248        | 3754  | NA | 0 | 2  | Low-quality    | Genome-fragment | NA | 3.78  |
| S12_extracted_k141_144425 | 6825  | NA | 0 | 3  | Not-determined | Genome-fragment | NA | 0     |
| S7_vs_136204[full]H2gme   | 3754  | NA | 1 | 0  | Low-quality    | Genome-fragment | NA | 7.59  |
| S12_extracted_k141_18299  | 1025  | NA | 0 | 2  | Not-determined | Genome-fragment | NA | 0     |
| S12_extracted_k141_18303  | 1229  | NA | 0 | 0  | Not-determined | Genome-fragment | NA | 0     |
| S12_extracted_k141_175323 | 1109  | NA | 0 | 0  | Not-determined | Genome-fragment | NA | 0     |
| S12_extracted_k141_128390 | 3822  | NA | 0 | 2  | Not-determined | Genome-fragment | NA | 0     |
| S12_extracted_k141_183748 | 4949  | NA | 0 | 2  | Not-determined | Genome-fragment | NA | 0     |
| S12_extracted_k141_1831   | 1165  | NA | 0 | 1  | Not-determined | Genome-fragment | NA | 0     |
| S12_extracted_k141_175330 | 1719  | NA | 0 | 1  | Not-determined | Genome-fragment | NA | 0     |
| S12_extracted_k141_42237  | 3038  | NA | 0 | 2  | Not-determined | Genome-fragment | NA | 0     |
| S12_extracted_k141_167743 | 1265  | NA | 0 | 1  | Not-determined | Genome-fragment | NA | 0     |
| S12_extracted_k141_18325  | 1259  | NA | 0 | 0  | Not-determined | Genome-fragment | NA | 0     |
| S12_extracted_k141_10018  | 1008  | NA | 0 | 1  | Not-determined | Genome-fragment | NA | 0     |
| S12_extracted_k141_18041  | 2167  | NA | 0 | 0  | Not-determined | Genome-fragment | NA | 0     |
| S12_extracted_k141_175372 | 1159  | NA | 0 | 0  | Not-determined | Genome-fragment | NA | 0     |
| S12_extracted_k141_97535  | 1527  | NA | 0 | 2  | Not-determined | Genome-fragment | NA | 0     |
| S4_vs_VHSort_26379 cat_2  | 3756  | NA | 0 | 0  | Low-quality    | Genome-fragment | NA | 8.26  |
| S5_vs_k141_11846[full]    | 3758  | NA | 0 | 0  | Low-quality    | Genome-fragment | NA | 2.2   |
| S8_vs_k141_65078[full]    | 3758  | NA | 1 | 0  | Low-quality    | Genome-fragment | NA | 5.46  |
| S12_extracted_k141_89550  | 3570  | NA | 0 | 1  | Not-determined | Genome-fragment | NA | 0     |
| S12_extracted_k141_58079  | 2218  | NA | 0 | 0  | Not-determined | Genome-fragment | NA | 0     |
| S12_extracted_k141_2800   | 2700  | NA | 0 | 2  | Not-determined | Genome-fragment | NA | 0     |
| S12_extracted_k141_89557  | 1166  | NA | 0 | 1  | Not-determined | Genome-fragment | NA | 0     |
| S12_extracted_k141_58095  | 1311  | NA | 0 | 1  | Not-determined | Genome-fragment | NA | 0     |
| S17_extracted_k141_59453  | 3759  | NA | 0 | 1  | Low-quality    | Genome-fragment | NA | 4.33  |
| S12_extracted_k141_2819   | 1665  | NA | 0 | 2  | Not-determined | Genome-fragment | NA | 0     |
| S1_vs_k141_46091[full]    | 3759  | NA | 3 | 0  | Low-quality    | Genome-fragment | NA | 11.24 |
| S12_extracted_k141_73029  | 1660  | NA | 0 | 0  | Not-determined | Genome-fragment | NA | 0     |
| S17_vs_k141_167392[full]  | 3760  | NA | 3 | 0  | Low-quality    | Genome-fragment | NA | 5.6   |
| S13_vs_123006[full]       | 3760  | NA | 0 | 1  | Low-quality    | Genome-fragment | NA | 2.67  |
| S2_vs_k141_12440[full]    | 3760  | NA | 3 | 0  | Low-quality    | Genome-fragment | NA | 2.11  |
| S12_extracted_k141_97614  | 1434  | NA | 0 | 0  | Not-determined | Genome-fragment | NA | 0     |
| S12_extracted_k141_73055  | 1014  | NA | 0 | 1  | Not-determined | Genome-fragment | NA | 0     |
| S7_vs_131831[full]        | 3760  | NA | 0 | 1  | Low-quality    | Genome-fragment | NA | 2.12  |
| S12_extracted_k141_18425  | 1236  | NA | 0 | 1  | Not-determined | Genome-fragment | NA | 0     |
| S16_vs_11769[full]        | 3760  | NA | 2 | 0  | Low-quality    | Genome-fragment | NA | 10.28 |
| S12_extracted_k141_42365  | 4933  | NA | 0 | 3  | Not-determined | Genome-fragment | NA | 0     |
| S12_extracted_k141_167857 | 3027  | NA | 0 | 0  | Not-determined | Genome-fragment | NA | 0     |
| S13_vs_8368[full]         | 3761  | NA | 1 | 0  | Low-quality    | Genome-fragment | NA | 9.67  |
| S5_vs_k141_108965[full]   | 3761  | NA | 0 | 2  | Low-quality    | Genome-fragment | NA | 0.53  |
| S12_extracted_k141_159709 | 1277  | NA | 0 | 2  | Not-determined | Genome-fragment | NA | 0     |
| S7_vs_57231[full]         | 3761  | NA | 4 | 0  | Low-quality    | Genome-fragment | NA | 10    |
| S10_extracted_48452       | 3761  | NA | 1 | 0  | Low-quality    | Genome-fragment | NA | 1.6   |
| S12_extracted_k141_58158  | 2512  | NA | 1 | 0  | Not-determined | Genome-fragment | NA | 0     |
| S12_extracted_k141_2902   | 3688  | NA | 0 | 2  | Not-determined | Genome-fragment | NA | 0     |
| S12_extracted_k141_105237 | 1361  | NA | 0 | 1  | Not-determined | Genome-fragment | NA | 0     |
| S12_extracted_k141_159795 | 8053  | NA | 0 | 4  | Not-determined | Genome-fragment | NA | 0     |
| S12_extracted_k141_105238 | 1214  | NA | 0 | 1  | Not-determined | Genome-fragment | NA | 0     |
| S12_extracted_k141_144431 | 2302  | NA | 0 | 2  | Not-determined | Genome-fragment | NA | 0     |
| S12_extracted_k141_65914  | 1292  | NA | 0 | 2  | Not-determined | Genome-fragment | NA | 0     |
| S12_extracted_k141_105271 | 1898  | NA | 0 | 1  | Not-determined | Genome-fragment | NA | 0     |
| S12_extracted_k141_58203  | 1022  | NA | 0 | 1  | Not-determined | Genome-fragment | NA | 0     |
| S12_extracted_k141_65939  | 2378  | NA | 0 | 0  | Not-determined | Genome-fragment | NA | 0     |
| S12_extracted_k141_97680  | 3949  | NA | 0 | 0  | Not-determined | Genome-fragment | NA | 0     |
| S12_extracted_k141_159777 | 3539  | NA | 0 | 4  | Not-determined | Genome-fragment | NA | 0     |
| S12_extracted_k141_42424  | 3446  | NA | 0 | 0  | Not-determined | Genome-fragment | NA | 0     |
| S12_extracted_k141_105303 | 1374  | NA | 0 | 0  | Not-determined | Genome-fragment | NA | 0     |
| S12_extracted_k141_97713  | 1281  | NA | 0 | 0  | Not-determined | Genome-fragment | NA | 0     |
| S12_extracted_k141_120717 | 1196  | NA | 0 | 1  | Not-determined | Genome-fragment | NA | 0     |
| S12_extracted_k141_175418 | 6212  | NA | 0 | 2  | Not-determined | Genome-fragment | NA | 0     |
| S12_extracted_k141_65984  | 1956  | NA | 0 | 2  | Not-determined | Genome-fragment | NA | 0     |
| S12_extracted_k141_97739  | 1032  | NA | 0 | 1  | Not-determined | Genome-fragment | NA | 0     |
| S12_extracted_k141_13828  | 1308  | NA | 0 | 0  | Not-determined | Genome-fragment | NA | 0     |
| S16_extracted_110134      | 3762  | NA | 4 | 0  | Low-quality    | Genome-fragment | NA | 2.21  |
| S12_extracted_k141_58248  | 6084  | NA | 0 | 3  | Not-determined | Genome-fragment | NA | 0     |
| S12_extracted_k141_120758 | 1214  | NA | 0 | 0  | Not-determined | Genome-fragment | NA | 0     |
| S12_extracted_k141_168030 | 1454  | NA | 0 | 1  | Not-determined | Genome-fragment | NA | 0     |
| S12_extracted_k141_58271  | 1757  | NA | 0 | 1  | Not-determined | Genome-fragment | NA | 0     |
| S12_extracted_k141_183970 | 1120  | NA | 0 | 0  | Not-determined | Genome-fragment | NA | 0     |
| S12_extracted_k141_18645  | 1308  | NA | 0 | 2  | Not            |                 |    |       |



|                            |        |     |       |    |   |                |                 |       |       |       |
|----------------------------|--------|-----|-------|----|---|----------------|-----------------|-------|-------|-------|
| S12_extracted_k141_58332   | 1171   | No  | NA    | 0  | 1 | Not-determined | Genome-fragment | NA    | 0     |       |
| S12_extracted_k141_16471   | 1762   | No  | NA    | 0  | 1 | Not-determined | Genome-fragment | NA    | 0     |       |
| S12_extracted_k141_89776   | 3745   | No  | NA    | 0  | 1 | Not-determined | Genome-fragment | NA    | 0     |       |
| S12_extracted_k141_112681  | 1047   | No  | NA    | 0  | 2 | Not-determined | Genome-fragment | NA    | 0     |       |
| S12_extracted_k141_49640   | 1008   | No  | NA    | 0  | 1 | Not-determined | Genome-fragment | NA    | 0     |       |
| S12_extracted_k141_89811   | 1111   | No  | NA    | 0  | 0 | Not-determined | Genome-fragment | NA    | 0     |       |
| S12_extracted_k141_73242   | 1306   | No  | NA    | 0  | 0 | Not-determined | Genome-fragment | NA    | 0     |       |
| S12_extracted_k141_18744   | 1018   | No  | NA    | 0  | 2 | Not-determined | Genome-fragment | NA    | 0     |       |
| S12_extracted_k141_1106    | 1008   | No  | NA    | 0  | 1 | Not-determined | Genome-fragment | NA    | 0     |       |
| S11_vs_k141_68763  full    | 3768   | No  | NA    | 2  | 0 | Low-quality    | Genome-fragment | NA    | 2.05  | 0     |
| S12_extracted_k141_81478   | 1492   | No  | NA    | 0  | 1 | Not-determined | Genome-fragment | NA    | 0     |       |
| S12_vs_k141_105244  full   | 3768   | No  | NA    | 0  | 0 | Low-quality    | Genome-fragment | NA    | 4.83  | 0     |
| S3_vs_k141_25892  full     | 3769   | No  | NA    | 0  | 0 | Low-quality    | Genome-fragment | NA    | 8.65  | 0     |
| S5_vs_k141_82478  full     | 3770   | No  | NA    | 1  | 0 | Low-quality    | Genome-fragment | NA    | 9.52  | 0     |
| S12_extracted_k141_49749   | 1175   | No  | NA    | 0  | 0 | Not-determined | Genome-fragment | NA    | 0     |       |
| S12_extracted_k141_112754  | 1214   | No  | NA    | 0  | 1 | Not-determined | Genome-fragment | NA    | 0     |       |
| S12_extracted_k141_112756  | 1019   | No  | NA    | 0  | 0 | Not-determined | Genome-fragment | NA    | 0     |       |
| S12_extracted_k141_152101  | 1053   | No  | NA    | 0  | 1 | Not-determined | Genome-fragment | NA    | 0     |       |
| S12_extracted_k141_98886   | 1263   | No  | NA    | 0  | 1 | Not-determined | Genome-fragment | NA    | 0     |       |
| S12_extracted_k141_81530   | 3195   | No  | NA    | 0  | 3 | Not-determined | Genome-fragment | NA    | 0     |       |
| S12_extracted_k141_144641  | 2289   | No  | NA    | 0  | 1 | Not-determined | Genome-fragment | NA    | 0     |       |
| S12_extracted_k141_27974   | 3563   | No  | NA    | 0  | 3 | Not-determined | Genome-fragment | NA    | 0     |       |
| S12_extracted_k141_184099  | 2476   | No  | NA    | 0  | 2 | Not-determined | Genome-fragment | NA    | 0     |       |
| S12_extracted_k141_66080   | 1302   | No  | NA    | 0  | 0 | Not-determined | Genome-fragment | NA    | 0     |       |
| S11_vs_k141_4851  full     | 3771   | No  | NA    | 0  | 0 | Low-quality    | Genome-fragment | NA    | 8.78  | 0     |
| S5_extracted_k141_6028     | 3771   | No  | NA    | 3  | 0 | Low-quality    | Genome-fragment | NA    | 11.58 | 0     |
| S3_vs_k141_66154  full     | 3772   | Yes | 2410  | 1  | 1 | Low-quality    | Genome-fragment | NA    | 1.55  | 36.11 |
| S5_vs_k141_11600  full     | 3772   | No  | NA    | 0  | 0 | Low-quality    | Genome-fragment | NA    | 1.67  | 0     |
| S16_extracted_27004        | 3772   | No  | NA    | 0  | 0 | Low-quality    | Genome-fragment | NA    | 7.58  | 0     |
| S12_extracted_k141_66093   | 3262   | No  | NA    | 0  | 5 | Not-determined | Genome-fragment | NA    | 0     |       |
| S12_extracted_k141_3197    | 4314   | No  | NA    | 0  | 2 | Not-determined | Genome-fragment | NA    | 0     |       |
| S12_extracted_k141_168167  | 2221   | No  | NA    | 0  | 2 | Not-determined | Genome-fragment | NA    | 0     |       |
| S12_extracted_k141_98010   | 1613   | No  | NA    | 0  | 1 | Not-determined | Genome-fragment | NA    | 0     |       |
| S12_extracted_k141_168169  | 1068   | No  | NA    | 0  | 0 | Not-determined | Genome-fragment | NA    | 0     |       |
| S12_extracted_k141_144666  | 3111   | No  | NA    | 0  | 0 | Not-determined | Genome-fragment | NA    | 0     |       |
| S17_extracted_k141_39091   | 3774   | No  | NA    | 0  | 0 | Low-quality    | Genome-fragment | NA    | 8.02  | 0     |
| S12_extracted_k141_184120  | 1153   | No  | NA    | 0  | 0 | Not-determined | Genome-fragment | NA    | 0     |       |
| S12_extracted_k141_136779  | 1461   | No  | NA    | 0  | 0 | Not-determined | Genome-fragment | NA    | 0     |       |
| S12_extracted_k141_89951   | 2430   | No  | NA    | 0  | 2 | Not-determined | Genome-fragment | NA    | 0     |       |
| S12_extracted_k141_144679  | 2232   | No  | NA    | 0  | 1 | Not-determined | Genome-fragment | NA    | 0     |       |
| S12_extracted_k141_3232    | 1299   | No  | NA    | 0  | 1 | Not-determined | Genome-fragment | NA    | 0     |       |
| S12_extracted_k141_81577   | 1442   | No  | NA    | 0  | 1 | Not-determined | Genome-fragment | NA    | 0     |       |
| S12_extracted_k141_73345   | 7950   | No  | NA    | 0  | 2 | Not-determined | Genome-fragment | NA    | 0     |       |
| S12_extracted_k141_168210  | 1484   | No  | NA    | 0  | 0 | Not-determined | Genome-fragment | NA    | 0     |       |
| S12_extracted_k141_152165  | 3191   | No  | NA    | 0  | 0 | Not-determined | Genome-fragment | NA    | 0     |       |
| S12_extracted_k141_26627   | 1334   | No  | NA    | 0  | 1 | Not-determined | Genome-fragment | NA    | 0     |       |
| S12_extracted_k141_136817  | 12456  | No  | NA    | 0  | 2 | Not-determined | Genome-fragment | NA    | 0     |       |
| S12_extracted_k141_152187  | 1001   | No  | NA    | 0  | 0 | Not-determined | Genome-fragment | NA    | 0     |       |
| S12_extracted_k141_15858   | 1081   | No  | NA    | 0  | 1 | Not-determined | Genome-fragment | NA    | 0     |       |
| S12_extracted_k141_144734  | 5509   | No  | NA    | 0  | 3 | Not-determined | Genome-fragment | NA    | 0     |       |
| S12_extracted_k141_105542  | 43702  | Yes | 33068 | 18 | 6 | High-quality   | High-quality    | 94.07 | 24.33 |       |
| S12_extracted_k141_1447144 | 1313   | No  | NA    | 0  | 0 | Not-determined | Genome-fragment | NA    | 0     |       |
| S12_extracted_k141_89998   | 1321   | No  | NA    | 0  | 0 | Not-determined | Genome-fragment | NA    | 0     |       |
| S12_extracted_k141_26669   | 1079   | No  | NA    | 0  | 1 | Not-determined | Genome-fragment | NA    | 0     |       |
| S12_extracted_k141_128647  | 1112   | No  | NA    | 0  | 2 | Not-determined | Genome-fragment | NA    | 0     |       |
| S12_extracted_k141_152212  | 1083   | No  | NA    | 0  | 1 | Not-determined | Genome-fragment | NA    | 0     |       |
| S12_extracted_k141_18892   | 4687   | No  | NA    | 0  | 3 | Not-determined | Genome-fragment | NA    | 0     |       |
| S10_extracted_90618        | 3774   | No  | NA    | 0  | 0 | Low-quality    | Genome-fragment | NA    | 1.65  | 0     |
| S11_vs_k141_28574  full    | 3775   | No  | NA    | 0  | 0 | Low-quality    | Genome-fragment | NA    | 6.38  | 0     |
| S12_extracted_k141_105569  | 3410   | No  | NA    | 0  | 0 | Not-determined | Genome-fragment | NA    | 0     |       |
| S12_extracted_k141_30038   | 1086   | No  | NA    | 0  | 0 | Not-determined | Genome-fragment | NA    | 0     |       |
| S11_vs_k141_17883  full    | 3776   | No  | NA    | 0  | 0 | Low-quality    | Genome-fragment | NA    | 9.55  | 0     |
| S5_vs_k141_126110  full    | 3776   | No  | NA    | 0  | 2 | Low-quality    | Genome-fragment | NA    | 1.04  | 0     |
| S8_vs_k141_58463  full     | 3776   | No  | NA    | 0  | 1 | Low-quality    | Genome-fragment | NA    | 4.22  | 0     |
| S12_extracted_k141_168324  | 1023   | No  | NA    | 0  | 0 | Not-determined | Genome-fragment | NA    | 0     |       |
| S3_vs_k141_102310  full    | 3777   | No  | NA    | 0  | 2 | Low-quality    | Genome-fragment | NA    | 2.24  | 0     |
| S12_extracted_k141_81702   | 4183   | No  | NA    | 0  | 3 | Not-determined | Genome-fragment | NA    | 0     |       |
| S16_vs_118024  full        | 3777   | No  | NA    | 1  | 0 | Low-quality    | Genome-fragment | NA    | 6.38  | 0     |
| S10_vs_116217  full        | 3777   | No  | NA    | 0  | 1 | Low-quality    | Genome-fragment | NA    | 7.86  | 0     |
| S12_extracted_k141_66206   | 4340   | No  | NA    | 0  | 3 | Not-determined | Genome-fragment | NA    | 0     |       |
| S12_extracted_k141_73470   | 1155   | No  | NA    | 0  | 1 | Not-determined | Genome-fragment | NA    | 0     |       |
| S12_extracted_k141_184259  | 1264   | No  | NA    | 0  | 1 | Not-determined | Genome-fragment | NA    | 0     |       |
| S12_extracted_k141_160138  | 1602   | No  | NA    | 0  | 1 | Not-determined | Genome-fragment | NA    | 0     |       |
| S12_extracted_k141_184265  | 1101   | No  | NA    | 0  | 0 | Not-determined | Genome-fragment | NA    | 0     |       |
| S12_extracted_k141_128722  | 4549   | No  | NA    | 0  | 1 | Not-determined | Genome-fragment | NA    | 0     |       |
| S12_extracted_k141_26746   | 4094   | No  | NA    | 0  | 0 | Not-determined | Genome-fragment | NA    | 0     |       |
| S12_extracted_k141_160161  | 1124   | No  | NA    | 0  | 1 | Not-determined | Genome-fragment | NA    | 0     |       |
| S9_extracted_k141_29049    | 3778   | No  | NA    | 3  | 0 | Low-quality    | Genome-fragment | NA    | 11.02 | 0     |
| S12_extracted_k141_156897  | 1806   | No  | NA    | 0  | 1 | Not-determined | Genome-fragment | NA    | 0     |       |
| S12_extracted_k141_90134   | 3976   | No  | NA    | 0  | 2 | Not-determined | Genome-fragment | NA    | 0     |       |
| S12_extracted_k141_175776  | 1012   | No  | NA    | 0  | 0 | Not-determined | Genome-fragment | NA    | 0     |       |
| S12_extracted_k141_90138   | 2260   | No  | NA    | 0  | 1 | Not-determined | Genome-fragment | NA    | 0     |       |
| S12_extracted_k141_81744   | 1283   | No  | NA    | 0  | 2 | Not-determined | Genome-fragment | NA    | 0     |       |
| S7_vs_89439  full          | 3778   | Yes | 2706  | 1  | 1 | Low-quality    | Genome-fragment | NA    | 7.18  | 28.37 |
| S17_vs_k141_112799  full   | 3779   | No  | NA    | 0  | 0 | Low-quality    | Genome-fragment | NA    | 1.52  | 0     |
| S12_extracted_k141_10294   | 2484   | No  | NA    | 0  | 1 | Not-determined | Genome-fragment | NA    | 0     |       |
| S3_vs_k141_119252  full    | 3779   | No  | NA    | 1  | 0 | Low-quality    | Genome-fragment | NA    | 5.36  | 0     |
| S12_extracted_k141_66263   | 1482   | No  | NA    | 0  | 2 | Not-determined | Genome-fragment | NA    | 0     |       |
| S8_vs_k141_107454  full    | 3780   | No  | NA    | 0  | 2 | Low-quality    | Genome-fragment | NA    | 0.73  | 0     |
| S12_extracted_k141_58561   | 1141   | No  | NA    | 0  | 1 | Not-determined | Genome-fragment | NA    | 0     |       |
| S8_vs_k141_119921  full    | 3780   | No  | NA    | 1  | 0 | Low-quality    | Genome-fragment | NA    | 8.07  | 0     |
| S12_extracted_k141_113021  | 1050   | No  | NA    | 0  | 0 | Not-determined | Genome-fragment | NA    | 0     |       |
| S12_extracted_k141_73551   | 1223   | No  | NA    | 0  | 1 | Not-determined | Genome-fragment | NA    | 0     |       |
| S12_extracted_k141_105741  | 1061   | No  | NA    | 0  | 1 | Not-determined | Genome-fragment | NA    | 0     |       |
| S12_extracted_k141_175830  | 3936   | No  | NA    | 0  | 1 | Not-determined | Genome-fragment | NA    | 0     |       |
| S12_extracted_k141_18902   | 117200 | No  | NA    | 34 | 4 | Complete       | High-quality    | 100   | 0     |       |
| S12_extracted_k141_90225   | 1075   | No  | NA    | 0  | 0 | Not-determined | Genome-fragment | NA    | 0     |       |
| S9_extracted_k141_62599    | 3781   | No  | NA    | 0  | 1 | Low-quality    | Genome-fragment | NA    | 1.88  | 0     |
| S12_extracted_k141_105773  | 1044   | No  | NA    | 0  | 0 | Not-determined | Genome-fragment | NA    | 0     |       |
| S12_extracted_k141_42976   | 2188   | No  | NA    | 0  | 1 | Not-determined | Genome-fragment | NA    | 0     |       |
| S12_extracted_k141_26799   | 1264   | No  | NA    | 0  | 2 | Not-determined | Genome-fragment | NA    | 0     |       |
| S12_extracted_k141_118794  | 45090  | No  | NA    | 14 | 0 | Complete       | High-quality    | 100   | 0     |       |
| S12_extracted_k141_144963  | 1236   | No  | NA    | 0  | 0 | Not-determined | Genome-fragment | NA    | 0     |       |
| S12_extracted_k141_136996  | 2155   | No  | NA    | 0  | 1 | Not-determined | Genome-fragment | NA    | 0     |       |
| S12_extracted_k141_66861   | 3781   | No  | NA    | 0  | 0 | Low-quality    | Genome-fragment | NA    | 0.42  | 0     |
| S12_extracted_k141_144973  | 1213   | No  | NA    | 0  | 0 | Not-determined | Genome-fragment | NA    | 0     |       |
| S12_extracted_k141_128803  | 1774   | No  | NA    | 0  | 2 | Not-determined | Genome-fragment | NA    | 0     |       |
| S11_vs_k141_84866  full    | 3781   | No  | NA    | 0  | 2 | Low-quality    | Genome-fragment | NA    | 4.95  | 0     |
| S12_extracted_k141_144883  | 7977   | No  | NA    | 0  | 0 | Not-determined | Genome-fragment | NA    | 0     |       |
| S12_extracted_k141_26819   | 9165   | No  | NA    | 0  | 0 | Not-determined | Genome-fragment | NA    | 0     |       |
| S12_extracted_k141_152358  | 1001   | No  | NA    | 0  | 1 | Not-determined | Genome-fragment | NA    | 0     |       |
| S12_extracted_k141_34186   | 2133   | No  | NA    | 0  | 0 | Not-determined | Genome-fragment | NA    | 0     |       |
| S12_extracted_k141_144994  | 4062   | No  | NA    | 0  | 4 | Not-determined | Genome-fragment | NA    | 0     |       |
| S12_extracted_k141_50278   | 1008   | No  | NA    | 0  | 0 | Not-determined | Genome-fragment | NA    | 0     |       |
| S12_extracted_k141_163842  | 1421   | No  | NA    | 0  | 1 | Not-determined | Genome-fragment | NA    | 0     |       |
| S9_extracted_k141_49320    | 3782   | No  | NA    | 0  | 2 | Low-quality    | Genome-fragment | NA    | 8.13  | 0     |
| S12_extracted_k141_58862   | 1031   | No  | NA    | 0  | 1 | Not-determined | Genome-fragment | NA    | 0     |       |
| S14_vs_k141_87059  full    | 3782   | No  | NA    | 0  | 1 | Low-quality    | Genome-fragment | NA    | 3.71  | 0     |
| S12_extracted_k141_168335  | 1043   | No  | NA    | 0  | 0 | Not-determined | Genome-fragment | NA    | 0     |       |
| S12_extracted_k141_175899  | 1706   | No  | NA    | 0  | 1 | Not-determined | Genome-fragment | NA    | 0     |       |
| S12_extracted_k141_73605   | 4050   | No  | NA    | 0  | 2 | Not-determined | Genome-fragment | NA    | 0     |       |
| S12_extracted_k141_66322   | 3111   | No  | NA    | 0  | 1 | Not-determined | Genome-fragment | NA    | 0     |       |
| S12_extracted_k141_168557  | 1952   | No  | NA    | 0  | 2 | Not-determined | Genome-fragment | NA    | 0     |       |
| S12_extracted_k141_168562  | 1057   | No  | NA    | 0  | 0 | Not-determined | Genome-fragment | NA    | 0     |       |
| S9_extracted_k141_98884    | 3783   | No  | NA    | 0  | 1 | Low-quality    | Genome-fragment | NA    | 4.8   | 0     |
| S12_extracted_k141_18943   | 3098   | No  | NA    | 0  | 1 | Not-determined | Genome-fragment | NA    | 0     |       |
| S8_vs_k141_168114  full    | 3783   | No  | NA    | 0  | 3 | Low-quality    | Genome-fragment | NA    | 1.61  | 0     |
| S12_extracted_k141_90298   | 1065   | No  | NA    | 0  | 0 | Not-determined | Genome-fragment | NA    | 0     |       |
| S12_extracted_k141_34251   | 1422   | No  | NA    | 0  | 0 | Not-determined | Genome-fragment | NA    | 0     |       |
| S12_extracted_k141_34253   | 1819   | No  | NA    | 0  | 1 | Not-determined | Genome-fragment | NA    | 0     |       |
| S17_vs_k141_93877  full    | 3784   | No  | NA    | 0  | 3 | Low-quality    | Genome-fragment | NA    | 2.31  | 0     |
| S12_extracted_k141_66361   | 1268   | No  | NA    | 0  | 0 | Not-determined | Genome-fragment | NA    | 0     |       |
| S12_extracted_k141_34269   | 3493   | No  | NA    | 0  | 2 | Not-determined | Genome-fragment | NA    | 0     |       |
| S12_extracted_k141_43101   | 3960   | No  | NA    | 0  | 2 | Not-determined | Genome-fragment | NA    | 0     |       |
| S14_extracted_k141_74615   | 3784   | No  | NA    | 2  | 0 | Low-quality    | Genome-fragment | NA    | 10.14 | 0     |
| S12_extracted_k141_128933  | 1084   | No  | NA    | 0  | 0 | Not-determined | Genome-fragment | NA    | 0     |       |
| S3_extracted_k141_44497    | 3784   | No  | NA    | 0  |   |                |                 |       |       |       |



|                           |       |     |    |      |   |                |                 |       |       |
|---------------------------|-------|-----|----|------|---|----------------|-----------------|-------|-------|
| S5_vs_k141_43650 full     | 3786  | No  | NA | 0    | 2 | Low-quality    | Genome-fragment | 8.12  | 0     |
| S12_extracted_k141_160594 | 4276  | No  | NA | 1    | 0 | Not-determined | Genome-fragment | NA    | 0     |
| S12_extracted_k141_145111 | 1110  | No  | NA | 0    | 0 | Not-determined | Genome-fragment | NA    | 0     |
| S12_extracted_k141_98580  | 4454  | No  | NA | 0    | 2 | Not-determined | Genome-fragment | NA    | 0     |
| S12_extracted_k141_10643  | 1036  | No  | NA | 0    | 0 | Not-determined | Genome-fragment | NA    | 0     |
| S12_extracted_k141_106137 | 2958  | No  | NA | 0    | 0 | Not-determined | Genome-fragment | NA    | 0     |
| S4_extracted_23012        | 3786  | No  | NA | 1    | 0 | Low-quality    | Genome-fragment | 9.56  | 0     |
| S12_extracted_k141_137275 | 1031  | No  | NA | 0    | 0 | Not-determined | Genome-fragment | NA    | 0     |
| S12_extracted_k141_137280 | 1261  | No  | NA | 0    | 0 | Not-determined | Genome-fragment | NA    | 0     |
| S12_extracted_k141_90587  | 1023  | No  | NA | 0    | 1 | Not-determined | Genome-fragment | NA    | 0     |
| S12_extracted_k141_90589  | 2614  | No  | NA | 0    | 1 | Not-determined | Genome-fragment | NA    | 0     |
| S12_extracted_k141_176207 | 5719  | No  | NA | 0    | 0 | Not-determined | Genome-fragment | NA    | 0     |
| S12_extracted_k141_145156 | 2688  | No  | NA | 0    | 0 | Not-determined | Genome-fragment | NA    | 0     |
| S12_extracted_k141_43358  | 1560  | No  | NA | 0    | 1 | Not-determined | Genome-fragment | NA    | 0     |
| S12_extracted_k141_121231 | 1139  | No  | NA | 0    | 1 | Not-determined | Genome-fragment | NA    | 0     |
| S12_extracted_k141_10681  | 1950  | No  | NA | 0    | 0 | Not-determined | Genome-fragment | NA    | 0     |
| S12_extracted_k141_184710 | 1248  | No  | NA | 0    | 0 | Not-determined | Genome-fragment | NA    | 0     |
| S12_extracted_k141_3890   | 1079  | No  | NA | 0    | 1 | Not-determined | Genome-fragment | NA    | 0     |
| S12_extracted_k141_98624  | 1088  | No  | NA | 0    | 0 | Not-determined | Genome-fragment | NA    | 0     |
| S12_extracted_k141_160630 | 1241  | No  | NA | 0    | 1 | Not-determined | Genome-fragment | NA    | 0     |
| S12_extracted_k141_50289  | 1353  | No  | NA | 0    | 2 | Not-determined | Genome-fragment | NA    | 0     |
| S8_extracted_k141_239515  | 3786  | No  | NA | 1    | 0 | Low-quality    | Genome-fragment | 2.18  | 0     |
| S12_extracted_k141_152662 | 1744  | No  | NA | 0    | 1 | Not-determined | Genome-fragment | NA    | 0     |
| S8_extracted_k141_163748  | 3786  | No  | NA | 0    | 2 | Low-quality    | Genome-fragment | 3.27  | 0     |
| S12_extracted_k141_129062 | 1081  | No  | NA | 0    | 1 | Not-determined | Genome-fragment | NA    | 0     |
| S12_extracted_k141_129063 | 1036  | No  | NA | 0    | 0 | Not-determined | Genome-fragment | NA    | 0     |
| S11_vs_k141_85787 full    | 3788  | No  | NA | 0    | 1 | Low-quality    | Genome-fragment | 4.73  | 0     |
| S12_extracted_k141_27059  | 1063  | No  | NA | 0    | 1 | Not-determined | Genome-fragment | NA    | 0     |
| S13_vs_12340 full         | 3789  | No  | NA | 0    | 0 | Low-quality    | Genome-fragment | 9.05  | 0     |
| S12_extracted_k141_176261 | 5109  | No  | NA | 0    | 4 | Not-determined | Genome-fragment | NA    | 0     |
| S12_extracted_k141_137360 | 3245  | No  | NA | 0    | 1 | Not-determined | Genome-fragment | NA    | 0     |
| S12_extracted_k141_176217 | 2078  | No  | NA | 0    | 0 | Not-determined | Genome-fragment | NA    | 0     |
| S12_extracted_k141_145176 | 1459  | No  | NA | 0    | 2 | Not-determined | Genome-fragment | NA    | 0     |
| S12_extracted_k141_176273 | 3125  | No  | NA | 0    | 1 | Not-determined | Genome-fragment | NA    | 0     |
| S12_extracted_k141_129103 | 1024  | No  | NA | 0    | 1 | Not-determined | Genome-fragment | NA    | 0     |
| S12_extracted_k141_184713 | 1565  | No  | NA | 0    | 0 | Not-determined | Genome-fragment | NA    | 0     |
| S12_extracted_k141_184788 | 1724  | No  | NA | 0    | 1 | Not-determined | Genome-fragment | NA    | 0     |
| S12_extracted_k141_145209 | 1243  | No  | NA | 0    | 1 | Not-determined | Genome-fragment | NA    | 0     |
| S12_extracted_k141_152716 | 1641  | No  | NA | 0    | 1 | Not-determined | Genome-fragment | NA    | 0     |
| S12_extracted_k141_27101  | 1078  | No  | NA | 0    | 2 | Not-determined | Genome-fragment | NA    | 0     |
| S10_vs_56618 full         | 3789  | Yes | NA | 1785 | 1 | Low-quality    | Genome-fragment | 1.28  | 52.89 |
| S12_extracted_k141_121294 | 5372  | No  | NA | 5    | 1 | Not-determined | Genome-fragment | NA    | 0     |
| S12_extracted_k141_168748 | 1709  | No  | NA | 0    | 1 | Not-determined | Genome-fragment | NA    | 0     |
| S16_extracted_140447      | 3792  | No  | NA | 0    | 4 | Low-quality    | Genome-fragment | 1.4   | 0     |
| S13_vs_k141_53640 full    | 3794  | No  | NA | 0    | 2 | Low-quality    | Genome-fragment | 2.83  | 0     |
| S12_extracted_k141_160679 | 1165  | No  | NA | 0    | 0 | Not-determined | Genome-fragment | NA    | 0     |
| S12_extracted_k141_74026  | 2303  | No  | NA | 0    | 1 | Not-determined | Genome-fragment | NA    | 0     |
| S12_extracted_k141_113435 | 1154  | No  | NA | 0    | 1 | Not-determined | Genome-fragment | NA    | 0     |
| S12_extracted_k141_27191  | 1129  | No  | NA | 0    | 0 | Not-determined | Genome-fragment | NA    | 0     |
| S12_extracted_k141_152796 | 2143  | No  | NA | 0    | 0 | Not-determined | Genome-fragment | NA    | 0     |
| S12_extracted_k141_10824  | 1847  | No  | NA | 0    | 1 | Not-determined | Genome-fragment | NA    | 0     |
| S12_extracted_k141_113440 | 1042  | No  | NA | 0    | 0 | Not-determined | Genome-fragment | NA    | 0     |
| S12_extracted_k141_137450 | 1143  | No  | NA | 0    | 1 | Not-determined | Genome-fragment | NA    | 0     |
| S12_extracted_k141_106270 | 1185  | No  | NA | 0    | 0 | Not-determined | Genome-fragment | NA    | 0     |
| S12_extracted_k141_50428  | 5092  | No  | NA | 0    | 5 | Not-determined | Genome-fragment | NA    | 0     |
| S12_extracted_k141_113461 | 1117  | No  | NA | 0    | 0 | Not-determined | Genome-fragment | NA    | 0     |
| S3_extracted_k141_34756   | 3795  | No  | NA | 4    | 0 | Low-quality    | Genome-fragment | 9.47  | 0     |
| S12_extracted_k141_58940  | 1216  | No  | NA | 0    | 1 | Not-determined | Genome-fragment | NA    | 0     |
| S12_extracted_k141_66575  | 1672  | No  | NA | 0    | 0 | Not-determined | Genome-fragment | NA    | 0     |
| S12_extracted_k141_121356 | 5648  | No  | NA | 0    | 4 | Not-determined | Genome-fragment | NA    | 0     |
| S12_extracted_k141_58953  | 4246  | No  | NA | 0    | 0 | Not-determined | Genome-fragment | NA    | 0     |
| S12_extracted_k141_50477  | 3327  | No  | NA | 0    | 0 | Not-determined | Genome-fragment | NA    | 0     |
| S12_extracted_k141_145329 | 1574  | No  | NA | 0    | 1 | Not-determined | Genome-fragment | NA    | 0     |
| S7_extracted_127724       | 3796  | No  | NA | 0    | 1 | Low-quality    | Genome-fragment | 7.46  | 0     |
| S12_extracted_k141_23289  | 1389  | No  | NA | 0    | 0 | Not-determined | Genome-fragment | NA    | 0     |
| S12_extracted_k141_98856  | 1293  | No  | NA | 0    | 0 | Not-determined | Genome-fragment | NA    | 0     |
| S12_extracted_k141_50499  | 1070  | No  | NA | 0    | 1 | Not-determined | Genome-fragment | NA    | 0     |
| S16_vs_58354 full         | 3796  | No  | NA | 0    | 4 | Low-quality    | Genome-fragment | 4.61  | 0     |
| S12_extracted_k141_66614  | 1340  | No  | NA | 0    | 0 | Not-determined | Genome-fragment | NA    | 0     |
| S12_extracted_72938       | 3796  | No  | NA | 0    | 4 | Low-quality    | Genome-fragment | 1.4   | 0     |
| S17_vs_k141_57026 full    | 3797  | No  | NA | 0    | 0 | Low-quality    | Genome-fragment | 7.28  | 0     |
| S5_vs_k141_149744 full    | 3797  | No  | NA | 0    | 1 | Low-quality    | Genome-fragment | 4.04  | 0     |
| S12_extracted_k141_19333  | 2481  | No  | NA | 0    | 4 | Not-determined | Genome-fragment | NA    | 0     |
| S12_extracted_k141_184907 | 4682  | No  | NA | 0    | 2 | Not-determined | Genome-fragment | NA    | 0     |
| S12_extracted_k141_27317  | 1972  | No  | NA | 0    | 0 | Not-determined | Genome-fragment | NA    | 0     |
| S12_extracted_k141_66633  | 1126  | No  | NA | 0    | 1 | Not-determined | Genome-fragment | NA    | 0     |
| S12_extracted_k141_66645  | 1375  | No  | NA | 0    | 2 | Not-determined | Genome-fragment | NA    | 0     |
| S12_extracted_k141_129346 | 1226  | No  | NA | 0    | 1 | Not-determined | Genome-fragment | NA    | 0     |
| S12_extracted_k141_66649  | 1102  | No  | NA | 0    | 0 | Not-determined | Genome-fragment | NA    | 0     |
| S9_extracted_k141_41658   | 3798  | No  | NA | 2    | 0 | Low-quality    | Genome-fragment | 5.33  | 0     |
| S12_extracted_k141_50568  | 2702  | No  | NA | 0    | 1 | Not-determined | Genome-fragment | NA    | 0     |
| S7_extracted_48644        | 3798  | No  | NA | 0    | 0 | Low-quality    | Genome-fragment | 4.15  | 0     |
| S12_extracted_k141_10887  | 65312 | No  | NA | 19   | 0 | Complete       | High-quality    | 100   | 0     |
| S12_extracted_k141_82363  | 1126  | No  | NA | 0    | 1 | Not-determined | Genome-fragment | NA    | 0     |
| S12_extracted_k141_121439 | 2528  | No  | NA | 0    | 1 | Not-determined | Genome-fragment | NA    | 0     |
| S12_extracted_k141_121440 | 3054  | No  | NA | 0    | 1 | Not-determined | Genome-fragment | NA    | 0     |
| S12_extracted_k141_66676  | 3719  | No  | NA | 0    | 2 | Not-determined | Genome-fragment | NA    | 0     |
| S12_extracted_k141_129374 | 2200  | No  | NA | 0    | 2 | Not-determined | Genome-fragment | NA    | 0     |
| S12_extracted_k141_184951 | 1576  | No  | NA | 0    | 0 | Not-determined | Genome-fragment | NA    | 0     |
| S12_extracted_k141_50589  | 1197  | No  | NA | 0    | 1 | Not-determined | Genome-fragment | NA    | 0     |
| S12_extracted_k141_74178  | 1137  | No  | NA | 0    | 1 | Not-determined | Genome-fragment | NA    | 0     |
| S12_extracted_k141_34631  | 2669  | No  | NA | 0    | 0 | Not-determined | Genome-fragment | NA    | 0     |
| S16_extracted_168955      | 3799  | No  | NA | 0    | 1 | Low-quality    | Genome-fragment | 4.13  | 0     |
| S12_extracted_k141_121463 | 1088  | No  | NA | 0    | 0 | Not-determined | Genome-fragment | NA    | 0     |
| S12_extracted_k141_168879 | 1201  | No  | NA | 0    | 0 | Not-determined | Genome-fragment | NA    | 0     |
| S12_extracted_k141_176437 | 15756 | No  | NA | 7    | 0 | Medium-quality | Genome-fragment | 67.39 | 0     |
| S8_vs_k141_189040 full    | 3799  | No  | NA | 0    | 2 | Low-quality    | Genome-fragment | 4.96  | 0     |
| S17_extracted_k141_81882  | 3800  | No  | NA | 0    | 2 | Low-quality    | Genome-fragment | 1.49  | 0     |
| S12_extracted_k141_10955  | 2052  | No  | NA | 0    | 0 | Not-determined | Genome-fragment | NA    | 0     |
| S12_extracted_k141_145453 | 1268  | No  | NA | 0    | 2 | Not-determined | Genome-fragment | NA    | 0     |
| S12_extracted_k141_185015 | 1519  | No  | NA | 0    | 1 | Not-determined | Genome-fragment | NA    | 0     |
| S12_extracted_k141_14682  | 2954  | No  | NA | 0    | 0 | Not-determined | Genome-fragment | NA    | 0     |
| S12_extracted_k141_34687  | 1103  | No  | NA | 0    | 1 | Not-determined | Genome-fragment | NA    | 0     |
| S12_extracted_k141_121503 | 1144  | No  | NA | 0    | 1 | Not-determined | Genome-fragment | NA    | 0     |
| S14_extracted_k141_103718 | 3800  | No  | NA | 0    | 0 | Low-quality    | Genome-fragment | 5.56  | 0     |
| S12_extracted_k141_145478 | 4675  | No  | NA | 0    | 1 | Not-determined | Genome-fragment | NA    | 0     |
| S12_extracted_k141_50649  | 3619  | No  | NA | 0    | 2 | Not-determined | Genome-fragment | NA    | 0     |
| S12_extracted_k141_168950 | 2892  | No  | NA | 0    | 0 | Not-determined | Genome-fragment | NA    | 0     |
| S12_extracted_k141_168955 | 3027  | No  | NA | 0    | 0 | Not-determined | Genome-fragment | NA    | 0     |
| S12_extracted_k141_59091  | 3662  | No  | NA | 0    | 2 | Not-determined | Genome-fragment | NA    | 0     |
| S12_extracted_k141_4069   | 3794  | No  | NA | 0    | 1 | Not-determined | Genome-fragment | NA    | 0     |
| S12_extracted_k141_17463  | 3160  | No  | NA | 0    | 0 | Not-determined | Genome-fragment | NA    | 0     |
| S14_extracted_k141_20579  | 3800  | No  | NA | 0    | 0 | Low-quality    | Genome-fragment | 8.81  | 0     |
| S12_extracted_k141_106443 | 1529  | No  | NA | 0    | 1 | Not-determined | Genome-fragment | NA    | 0     |
| S1_vs_k141_107771 full    | 3800  | No  | NA | 0    | 0 | Low-quality    | Genome-fragment | 6.88  | 0     |
| S12_extracted_k141_106466 | 1387  | No  | NA | 0    | 1 | Not-determined | Genome-fragment | NA    | 0     |
| S12_extracted_k141_145526 | 1035  | No  | NA | 0    | 1 | Not-determined | Genome-fragment | NA    | 0     |
| S12_extracted_k141_66825  | 1808  | No  | NA | 0    | 1 | Not-determined | Genome-fragment | NA    | 0     |
| S12_extracted_k141_27501  | 1717  | No  | NA | 0    | 0 | Not-determined | Genome-fragment | NA    | 0     |
| S3_extracted_k141_27104   | 3800  | No  | NA | 1    | 0 | Low-quality    | Genome-fragment | 6.63  | 0     |
| S12_extracted_k141_59144  | 7532  | No  | NA | 0    | 2 | Not-determined | Genome-fragment | NA    | 0     |
| S12_extracted_k141_137718 | 1009  | No  | NA | 0    | 1 | Not-determined | Genome-fragment | NA    | 0     |
| S12_extracted_k141_99047  | 1301  | No  | NA | 0    | 1 | Not-determined | Genome-fragment | NA    | 0     |
| S12_extracted_k141_113644 | 2236  | No  | NA | 0    | 0 | Not-determined | Genome-fragment | NA    | 0     |
| S12_extracted_k141_50729  | 1421  | No  | NA | 0    | 0 | Not-determined | Genome-fragment | NA    | 0     |
| S5_vs_k141_43877 full     | 3800  | No  | NA | 0    | 0 | Low-quality    | Genome-fragment | 9.18  | 0     |
| S12_extracted_k141_137746 | 1438  | No  | NA | 0    | 1 | Not-determined | Genome-fragment | NA    | 0     |
| S12_extracted_k141_121620 | 1033  | No  | NA | 0    | 1 | Not-determined | Genome-fragment | NA    | 0     |
| S12_extracted_k141_137759 | 1760  | No  | NA | 0    | 1 | Not-determined | Genome-fragment | NA    | 0     |
| S12_extracted_k141_137761 | 1012  | No  | NA | 0    | 2 | Not-determined | Genome-fragment | NA    | 0     |
| S12_extracted_k141_108082 | 6367  | No  | NA | 0    | 5 | Not-determined | Genome-fragment | NA    | 0     |
| S12_extracted_k141_106511 | 1336  | No  | NA | 0    | 0 | Not-determined | Genome-fragment | NA    | 0     |
| S12_extracted_k141_113656 | 1100  | No  | NA | 0    | 2 | Not-determined | Genome-fragment | NA    | 0     |
| S3_extracted_k141_38023   | 3801  | No  | NA | 1    | 0 | Low-quality    | Genome-fragment | 2.48  | 0     |
| S16_vs_511261 full        | 3801  | No  | NA | 1    | 0 | Low-quality    | Genome-fragment | 2.41  | 0     |
| S12_extracted_k141_11014  | 1104  | No  | NA | 0    | 0 | Not-determined | Genome-fragment | NA    | 0     |
| S12_extracted_k141_106520 | 1126  | No  | NA | 0    | 0 | Not-determined | Genome-fragment | NA    | 0     |
| S12_extracted_k141_14816  | 1281  | No  | NA | 0    | 0 | Not-determined | Genome-fragment | NA    | 0     |
| S12_extracted_k141_59212  | 2860  | No  | NA | 0    | 4 | Not-determined | Genome-fragment | NA    | 0     |
| S12_extracted_k141_27571  | 4528  | No  | NA | 0    | 0 | Not-determined | Genome-fragment | NA    | 0     |
| S7_vs_118133 full         | 3802  | No  | NA | 0    | 0 | Low-quality    | Genome-fragment | 3.79  | 0     |
| S12_extracted_k141_153110 | 8392  | No  | NA | 0    | 4 | Not-determined | Genome-fragment | NA    | 0     |
| S12_extracted_k141_50786  | 1243  | No  | NA | 0    | 2 | Not-determined | Genome-fragment | NA    | 0     |
| S12_extracted_k141_12512  | 9321  | No  | NA | 0    | 0 | Not-determined | Genome-fragment | NA    | 0     |
| S12_extracted_k141_129538 |       |     |    |      |   |                |                 |       |       |



|                           |       |     |    |    |             |                 |                 |     |       |       |
|---------------------------|-------|-----|----|----|-------------|-----------------|-----------------|-----|-------|-------|
| S12_extracted_k141_137893 | 1600  | No  | NA | 0  | 0           | Not-determined  | Genome-fragment | NA  |       | 0     |
| S12_vs_504051[full]       | 3805  | No  | NA | 0  | 0           | Low-quality     | Genome-fragment | NA  | 10.02 | 0     |
| S12_extracted_k141_153248 | 1050  | No  | NA | 0  | 0           | Not-determined  | Genome-fragment | NA  |       | 0     |
| S12_extracted_k141_90991  | 1060  | No  | NA | 0  | 1           | Not-determined  | Genome-fragment | NA  |       | 0     |
| S12_extracted_k141_145723 | 1779  | No  | NA | 0  | 1           | Not-determined  | Genome-fragment | NA  |       | 0     |
| S12_extracted_k141_50868  | 1254  | No  | NA | 0  | 2           | Not-determined  | Genome-fragment | NA  |       | 0     |
| S12_extracted_k141_74435  | 1054  | No  | NA | 0  | 1           | Not-determined  | Genome-fragment | NA  |       | 0     |
| S12_extracted_k141_66941  | 2127  | No  | NA | 0  | 0           | Not-determined  | Genome-fragment | NA  |       | 0     |
| S12_extracted_k141_34957  | 3090  | No  | NA | 0  | 2           | Not-determined  | Genome-fragment | NA  |       | 0     |
| S12_extracted_k141_27720  | 1131  | No  | NA | 0  | 2           | Not-determined  | Genome-fragment | NA  |       | 0     |
| S12_extracted_k141_27723  | 1213  | No  | NA | 0  | 1           | Not-determined  | Genome-fragment | NA  |       | 0     |
| S12_extracted_k141_4298   | 1046  | No  | NA | 0  | 1           | Not-determined  | Genome-fragment | NA  |       | 0     |
| S12_extracted_k141_137943 | 1245  | No  | NA | 0  | 0           | Not-determined  | Genome-fragment | NA  |       | 0     |
| S12_extracted_k141_169234 | 1006  | No  | NA | 0  | 1           | Not-determined  | Genome-fragment | NA  |       | 0     |
| S12_extracted_k141_145764 | 1020  | No  | NA | 0  | 0           | Not-determined  | Genome-fragment | NA  |       | 0     |
| S12_extracted_k141_509516 | 3216  | No  | NA | 0  | 2           | Not-determined  | Genome-fragment | NA  |       | 0     |
| S12_extracted_k141_4332   | 1862  | No  | NA | 0  | 0           | Not-determined  | Genome-fragment | NA  |       | 0     |
| S12_extracted_k141_137972 | 1219  | No  | NA | 0  | 2           | Not-determined  | Genome-fragment | NA  |       | 0     |
| S14_vs_k141_26046[full]   | 3805  | No  | NA | 0  | 1           | Low-quality     | Genome-fragment | NA  | 6.55  | 0     |
| S12_extracted_k141_82707  | 1191  | No  | NA | 0  | 2           | Not-determined  | Genome-fragment | NA  |       | 0     |
| S12_extracted_k141_50951  | 1240  | No  | NA | 0  | 1           | Not-determined  | Genome-fragment | NA  |       | 0     |
| S12_extracted_k141_17476  | 1588  | No  | NA | 0  | 2           | Not-determined  | Genome-fragment | NA  |       | 0     |
| S12_extracted_k141_4366   | 1014  | No  | NA | 0  | 0           | Not-determined  | Genome-fragment | NA  |       | 0     |
| S10_extracted_62557       | 3805  | No  | NA | 0  | 6           | Low-quality     | Genome-fragment | NA  | 1.76  | 0     |
| S12_extracted_k141_51071  | 1293  | No  | NA | 0  | 1           | Not-determined  | Genome-fragment | NA  |       | 0     |
| S1_extracted_k141_148762  | 3806  | No  | NA | 0  | 0           | Low-quality     | Genome-fragment | NA  | 2.48  | 0     |
| S12_extracted_k141_44003  | 11256 | No  | NA | 0  | 4           | Not-determined  | Genome-fragment | NA  |       | 0     |
| S12_extracted_k141_82746  | 3305  | No  | NA | 0  | 0           | Not-determined  | Genome-fragment | NA  |       | 0     |
| S12_extracted_k141_169349 | 3239  | No  | NA | 0  | 1           | Not-determined  | Genome-fragment | NA  |       | 0     |
| S17_extracted_k141_77708  | 3807  | No  | NA | 0  | 2           | Low-quality     | Genome-fragment | NA  | 2.11  | 0     |
| S12_extracted_k141_113815 | 1292  | No  | NA | 0  | 0           | Not-determined  | Genome-fragment | NA  |       | 0     |
| S12_extracted_k141_161216 | 1821  | No  | NA | 0  | 1           | Not-determined  | Genome-fragment | NA  |       | 0     |
| S12_extracted_k141_185401 | 1884  | No  | NA | 0  | 0           | Not-determined  | Genome-fragment | NA  |       | 0     |
| S12_extracted_k141_145884 | 1198  | No  | NA | 0  | 1           | Not-determined  | Genome-fragment | NA  |       | 0     |
| S17_vs_k141_134052[full]  | 3807  | No  | NA | 0  | 2           | Low-quality     | Genome-fragment | NA  | 4.38  | 0     |
| S11_vs_k141_11441[full]   | 3808  | No  | NA | 0  | 1           | Low-quality     | Genome-fragment | NA  | 2.46  | 0     |
| S12_extracted_k141_51012  | 1465  | No  | NA | 0  | 1           | Not-determined  | Genome-fragment | NA  |       | 0     |
| S12_extracted_k141_145905 | 1350  | No  | NA | 0  | 0           | Not-determined  | Genome-fragment | NA  |       | 0     |
| S16_extracted_90738       | 3808  | No  | NA | 0  | 0           | Low-quality     | Genome-fragment | NA  | 6.42  | 0     |
| S12_extracted_k141_67111  | 1303  | No  | NA | 0  | 2           | Not-determined  | Genome-fragment | NA  |       | 0     |
| S7_vs_76409[full]         | 3809  | No  | NA | 1  | 0           | Low-quality     | Genome-fragment | NA  | 6.8   | 0     |
| S16_vs_125297[full]       | 3809  | No  | NA | 2  | Low-quality | Genome-fragment | NA              | 1.1 | 0     |       |
| S12_extracted_k141_113848 | 1046  | No  | NA | 0  | 0           | Not-determined  | Genome-fragment | NA  |       | 0     |
| S12_extracted_k141_176501 | 1015  | No  | NA | 0  | 1           | Not-determined  | Genome-fragment | NA  |       | 0     |
| S12_extracted_k141_145943 | 3168  | No  | NA | 0  | 2           | Not-determined  | Genome-fragment | NA  |       | 0     |
| S12_extracted_k141_169316 | 1052  | No  | NA | 0  | 1           | Not-determined  | Genome-fragment | NA  |       | 0     |
| S8_vs_k141_5778[full]     | 3809  | No  | NA | 0  | 0           | Low-quality     | Genome-fragment | NA  | 9.76  | 0     |
| S5_extracted_k141_88508   | 3810  | No  | NA | 1  | 0           | Low-quality     | Genome-fragment | NA  | 8.47  | 0     |
| S12_extracted_k141_161509 | 5803  | No  | NA | 0  | 1           | Not-determined  | Genome-fragment | NA  |       | 0     |
| S12_extracted_k141_176515 | 1568  | No  | NA | 0  | 3           | Not-determined  | Genome-fragment | NA  |       | 0     |
| S12_extracted_k141_153358 | 1205  | No  | NA | 0  | 1           | Not-determined  | Genome-fragment | NA  |       | 0     |
| S12_extracted_k141_51086  | 2380  | No  | NA | 0  | 1           | Not-determined  | Genome-fragment | NA  |       | 0     |
| S12_extracted_k141_74639  | 1221  | No  | NA | 0  | 2           | Not-determined  | Genome-fragment | NA  |       | 0     |
| S7_vs_62641[full]         | 3810  | No  | NA | 1  | 0           | Low-quality     | Genome-fragment | NA  | 2.4   | 0     |
| S12_extracted_k141_59406  | 1144  | No  | NA | 0  | 1           | Not-determined  | Genome-fragment | NA  |       | 0     |
| S12_extracted_k141_161349 | 1001  | No  | NA | 0  | 1           | Not-determined  | Genome-fragment | NA  |       | 0     |
| S12_extracted_k141_27841  | 1052  | No  | NA | 0  | 3           | Not-determined  | Genome-fragment | NA  |       | 0     |
| S12_extracted_k141_99293  | 1124  | No  | NA | 0  | 0           | Not-determined  | Genome-fragment | NA  |       | 0     |
| S12_extracted_k141_185510 | 2442  | No  | NA | 0  | 2           | Not-determined  | Genome-fragment | NA  |       | 0     |
| S9_extracted_k141_86386   | 3811  | No  | NA | 0  | 0           | Low-quality     | Genome-fragment | NA  | 9.43  | 0     |
| S12_extracted_k141_11260  | 1620  | No  | NA | 0  | 1           | Not-determined  | Genome-fragment | NA  |       | 0     |
| S12_extracted_k141_11264  | 1785  | No  | NA | 0  | 2           | Not-determined  | Genome-fragment | NA  |       | 0     |
| S12_extracted_k141_35167  | 1176  | No  | NA | 0  | 0           | Not-determined  | Genome-fragment | NA  |       | 0     |
| S5_vs_k141_110714[full]   | 3811  | No  | NA | 3  | 0           | Low-quality     | Genome-fragment | NA  | 10.65 | 0     |
| S7_vs_10586[full]         | 3811  | No  | NA | 2  | 0           | Low-quality     | Genome-fragment | NA  | 8.13  | 0     |
| S12_extracted_k141_106834 | 1644  | No  | NA | 0  | 1           | Not-determined  | Genome-fragment | NA  |       | 0     |
| S12_extracted_k141_146019 | 3627  | No  | NA | 0  | 1           | Not-determined  | Genome-fragment | NA  |       | 0     |
| S12_extracted_k141_44178  | 1551  | No  | NA | 0  | 0           | Not-determined  | Genome-fragment | NA  |       | 0     |
| S12_extracted_k141_15667  | 3229  | No  | NA | 0  | 2           | Not-determined  | Genome-fragment | NA  |       | 0     |
| S12_extracted_k141_59577  | 1703  | No  | NA | 0  | 1           | Not-determined  | Genome-fragment | NA  |       | 0     |
| S12_extracted_k141_153456 | 1745  | No  | NA | 0  | 2           | Not-determined  | Genome-fragment | NA  |       | 0     |
| S12_extracted_k141_161416 | 1022  | No  | NA | 0  | 0           | Not-determined  | Genome-fragment | NA  |       | 0     |
| S12_extracted_k141_169406 | 3184  | No  | NA | 0  | 1           | Not-determined  | Genome-fragment | NA  |       | 0     |
| S12_extracted_k141_27899  | 1359  | No  | NA | 0  | 2           | Not-determined  | Genome-fragment | NA  |       | 0     |
| S12_extracted_k141_139317 | 1340  | No  | NA | 0  | 1           | Not-determined  | Genome-fragment | NA  |       | 0     |
| S12_extracted_k141_161416 | 2194  | No  | NA | 0  | 1           | Not-determined  | Genome-fragment | NA  |       | 0     |
| S16_vs_6539[full]         | 3811  | No  | NA | 0  | 1           | Low-quality     | Genome-fragment | NA  | 7.36  | 0     |
| S12_extracted_k141_121773 | 2772  | No  | NA | 0  | 1           | Not-determined  | Genome-fragment | NA  |       | 0     |
| S12_extracted_k141_67188  | 5704  | No  | NA | 45 | 2           | Not-determined  | Genome-fragment | NA  |       | 0     |
| S12_extracted_k141_91300  | 1120  | No  | NA | 0  | 1           | Not-determined  | Genome-fragment | NA  |       | 0     |
| S16_vs_39847[full]        | 3811  | No  | NA | 0  | 0           | Low-quality     | Genome-fragment | NA  | 3.59  | 0     |
| S11_vs_k141_812131[full]  | 3812  | No  | NA | 0  | 1           | Low-quality     | Genome-fragment | NA  | 5.46  | 0     |
| S12_extracted_k141_99334  | 1580  | No  | NA | 0  | 0           | Not-determined  | Genome-fragment | NA  |       | 0     |
| S12_extracted_k141_176618 | 1924  | No  | NA | 0  | 0           | Not-determined  | Genome-fragment | NA  |       | 0     |
| S12_extracted_k141_82075  | 1030  | No  | NA | 0  | 0           | Not-determined  | Genome-fragment | NA  |       | 0     |
| S12_extracted_k141_153512 | 1803  | No  | NA | 0  | 0           | Not-determined  | Genome-fragment | NA  |       | 0     |
| S1_vs_k141_29621[full]    | 3812  | No  | NA | 0  | 2           | Low-quality     | Genome-fragment | NA  | 2.38  | 0     |
| S12_extracted_k141_153531 | 1889  | No  | NA | 0  | 2           | Not-determined  | Genome-fragment | NA  |       | 0     |
| S5_vs_k141_30063[full]    | 3812  | No  | NA | 0  | 1           | Low-quality     | Genome-fragment | NA  | 1.32  | 0     |
| S12_extracted_k141_59650  | 1293  | No  | NA | 0  | 1           | Not-determined  | Genome-fragment | NA  |       | 0     |
| S12_extracted_k141_91347  | 1023  | No  | NA | 0  | 1           | Not-determined  | Genome-fragment | NA  |       | 0     |
| S12_extracted_k141_67263  | 1441  | No  | NA | 0  | 1           | Not-determined  | Genome-fragment | NA  |       | 0     |
| S3_vs_k141_92168[full]    | 3813  | No  | NA | 3  | 0           | Low-quality     | Genome-fragment | NA  | 10.03 | 0     |
| S12_extracted_k141_106962 | 1233  | No  | NA | 0  | 1           | Not-determined  | Genome-fragment | NA  |       | 0     |
| S11_extracted_k141_99521  | 3814  | No  | NA | 0  | 0           | Low-quality     | Genome-fragment | NA  | 10.78 | 0     |
| S12_extracted_k141_4635   | 3578  | No  | NA | 0  | 1           | Not-determined  | Genome-fragment | NA  |       | 0     |
| S12_extracted_k141_114074 | 1699  | No  | NA | 0  | 4           | Not-determined  | Genome-fragment | NA  |       | 0     |
| S12_extracted_k141_44242  | 1038  | No  | NA | 0  | 0           | Not-determined  | Genome-fragment | NA  |       | 0     |
| S12_extracted_k141_19715  | 3979  | No  | NA | 0  | 0           | Not-determined  | Genome-fragment | NA  |       | 0     |
| S12_extracted_k141_4642   | 6514  | No  | NA | 0  | 3           | Not-determined  | Genome-fragment | NA  |       | 0     |
| S11_vs_k141_39532[full]   | 3814  | Yes | NA | 1  | 1           | Low-quality     | Genome-fragment | NA  | 2.38  | 62.06 |
| S12_extracted_k141_129738 | 1143  | No  | NA | 0  | 0           | Not-determined  | Genome-fragment | NA  | 0     | 0     |
| S7_vs_71126[full]         | 3816  | No  | NA | 2  | 0           | Low-quality     | Genome-fragment | NA  | 9.04  | 0     |
| S12_extracted_k141_106989 | 2921  | No  | NA | 0  | 1           | Not-determined  | Genome-fragment | NA  |       | 0     |
| S12_extracted_k141_176690 | 3596  | No  | NA | 0  | 0           | Not-determined  | Genome-fragment | NA  |       | 0     |
| S12_extracted_k141_129741 | 2408  | No  | NA | 0  | 0           | Not-determined  | Genome-fragment | NA  |       | 0     |
| S12_extracted_k141_27982  | 6332  | No  | NA | 0  | 2           | Not-determined  | Genome-fragment | NA  |       | 0     |
| S12_extracted_k141_176694 | 3070  | No  | NA | 0  | 1           | Not-determined  | Genome-fragment | NA  |       | 0     |
| S12_extracted_k141_91362  | 1467  | No  | NA | 0  | 1           | Not-determined  | Genome-fragment | NA  |       | 0     |
| S4_extracted_19807        | 3816  | No  | NA | 1  | 0           | Low-quality     | Genome-fragment | NA  | 9.11  | 0     |
| S12_extracted_k141_146121 | 2806  | No  | NA | 0  | 2           | Not-determined  | Genome-fragment | NA  |       | 0     |
| S12_extracted_k141_51150  | 1181  | No  | NA | 0  | 0           | Not-determined  | Genome-fragment | NA  |       | 0     |
| S12_extracted_k141_44290  | 1129  | No  | NA | 0  | 0           | Not-determined  | Genome-fragment | NA  |       | 0     |
| S12_extracted_k141_185718 | 1842  | No  | NA | 0  | 1           | Not-determined  | Genome-fragment | NA  |       | 0     |
| S12_extracted_k141_114135 | 1032  | No  | NA | 0  | 0           | Not-determined  | Genome-fragment | NA  |       | 0     |
| S12_extracted_k141_161533 | 3088  | No  | NA | 0  | 2           | Not-determined  | Genome-fragment | NA  |       | 0     |
| S12_extracted_k141_185723 | 2317  | No  | NA | 0  | 0           | Not-determined  | Genome-fragment | NA  |       | 0     |
| S12_extracted_k141_59426  | 6108  | No  | NA | 0  | 1           | Not-determined  | Genome-fragment | NA  |       | 0     |
| S12_extracted_k141_146158 | 3387  | No  | NA | 0  | 0           | Not-determined  | Genome-fragment | NA  |       | 0     |
| S12_extracted_k141_161558 | 1242  | No  | NA | 0  | 0           | Not-determined  | Genome-fragment | NA  |       | 0     |
| S12_extracted_k141_153643 | 1844  | No  | NA | 0  | 1           | Not-determined  | Genome-fragment | NA  |       | 0     |
| S12_extracted_k141_14435  | 1031  | No  | NA | 0  | 1           | Not-determined  | Genome-fragment | NA  |       | 0     |
| S17_vs_k141_790951[full]  | 3819  | No  | NA | 0  | 2           | Low-quality     | Genome-fragment | NA  | 0.34  | 0     |
| S12_extracted_k141_167735 | 2162  | No  | NA | 0  | 2           | Not-determined  | Genome-fragment | NA  |       | 0     |
| S5_extracted_k141_72320   | 3819  | No  | NA | 0  | 0           | Low-quality     | Genome-fragment | NA  | 2.48  | 0     |
| S12_extracted_k141_146193 | 1790  | No  | NA | 0  | 2           | Not-determined  | Genome-fragment | NA  |       | 0     |
| S12_extracted_k141_91452  | 1372  | No  | NA | 0  | 1           | Not-determined  | Genome-fragment | NA  |       | 0     |
| S12_extracted_k141_146186 | 1965  | No  | NA | 0  | 1           | Not-determined  | Genome-fragment | NA  |       | 0     |
| S12_extracted_k141_11433  | 1154  | No  | NA | 0  | 0           | Not-determined  | Genome-fragment | NA  |       | 0     |
| S12_extracted_k141_51195  | 1121  | No  | NA | 0  | 0           | Not-determined  | Genome-fragment | NA  |       | 0     |
| S10_extracted_107991      | 3819  | No  | NA | 4  | 0           | Low-quality     | Genome-fragment | NA  | 11.96 | 0     |
| S7_vs_729921[full]        | 3820  | No  | NA | 2  | 0           | Low-quality     | Genome-fragment | NA  | 9.28  | 0     |
| S1_vs_k141_1235091[full]  | 3821  | No  | NA | 2  | 0           | Low-quality     | Genome-fragment | NA  | 10.4  | 0     |
| S12_extracted_k141_28053  | 4346  | No  | NA | 0  | 0           | Not-determined  | Genome-fragment | NA  |       | 0     |
| S12_extracted_k141_51213  | 11751 | No  | NA | 0  | 6           | Not-determined  | Genome-fragment | NA  |       | 0     |
| S17_extracted_k141_174136 | 3822  | No  | NA | 1  | 0           | Low-quality     | Genome-fragment | NA  | 8.17  | 0     |
| S12_extracted_k141_51228  | 7645  | No  | NA | 0  | 3           | Not-determined  | Genome-fragment | NA  |       | 0     |
| S12_extracted_k141_59080  |       |     |    |    |             |                 |                 |     |       |       |



|                           |        |     |      |    |   |                |                 |    |       |
|---------------------------|--------|-----|------|----|---|----------------|-----------------|----|-------|
| S12_extracted_k141_161812 | 1346   | No  | NA   | 0  | 2 | Not-determined | Genome-fragment | NA | 0     |
| S12_extracted_k141_107283 | 3426   | No  | NA   | 0  | 1 | Not-determined | Genome-fragment | NA | 0     |
| S12_extracted_k141_91618  | 1771   | No  | NA   | 0  | 1 | Not-determined | Genome-fragment | NA | 0     |
| S12_extracted_k141_176937 | 3782   | No  | NA   | 0  | 1 | Not-determined | Genome-fragment | NA | 0     |
| S12_extracted_k141_107300 | 1026   | No  | NA   | 0  | 1 | Not-determined | Genome-fragment | NA | 0     |
| S12_extracted_k141_169686 | 1956   | No  | NA   | 0  | 1 | Not-determined | Genome-fragment | NA | 0     |
| S10_vs_96505[full]        | 3827   | No  | NA   | 0  | 2 | Low-quality    | Genome-fragment | NA | 1.69  |
| S12_extracted_k141_51357  | 4487   | No  | NA   | 0  | 1 | Not-determined | Genome-fragment | NA | 0     |
| S12_extracted_k141_64580  | 1095   | No  | NA   | 0  | 1 | Not-determined | Genome-fragment | NA | 0     |
| S12_extracted_k141_75027  | 2546   | No  | NA   | 0  | 0 | Not-determined | Genome-fragment | NA | 0     |
| S12_extracted_k141_169691 | 1066   | No  | NA   | 0  | 0 | Not-determined | Genome-fragment | NA | 0     |
| S12_extracted_k141_122004 | 1610   | No  | NA   | 0  | 1 | Not-determined | Genome-fragment | NA | 0     |
| S12_extracted_k141_169724 | 1214   | No  | NA   | 0  | 0 | Not-determined | Genome-fragment | NA | 0     |
| S12_extracted_k141_75034  | 3521   | No  | NA   | 0  | 3 | Not-determined | Genome-fragment | NA | 0     |
| S12_extracted_k141_122007 | 1048   | No  | NA   | 0  | 0 | Not-determined | Genome-fragment | NA | 0     |
| S17_vs_k141_166161[full]  | 3828   | No  | NA   | 0  | 1 | Low-quality    | Genome-fragment | NA | 8.8   |
| S12_extracted_k141_138520 | 1045   | No  | NA   | 0  | 1 | Not-determined | Genome-fragment | NA | 0     |
| S12_extracted_k141_44626  | 3281   | No  | NA   | 0  | 0 | Not-determined | Genome-fragment | NA | 0     |
| S12_extracted_k141_92320  | 2852   | No  | NA   | 0  | 0 | Not-determined | Genome-fragment | NA | 0     |
| S12_extracted_k141_169753 | 1667   | No  | NA   | 0  | 0 | Not-determined | Genome-fragment | NA | 0     |
| S4_extracted_15625        | 3828   | No  | NA   | 6  | 0 | Low-quality    | Genome-fragment | NA | 12.63 |
| S12_extracted_k141_28282  | 1042   | No  | NA   | 0  | 1 | Not-determined | Genome-fragment | NA | 0     |
| S12_extracted_k141_20053  | 1139   | No  | NA   | 0  | 0 | Not-determined | Genome-fragment | NA | 0     |
| S7_extracted_90275        | 3829   | No  | NA   | 0  | 0 | Low-quality    | Genome-fragment | NA | 6.4   |
| S12_extracted_k141_28293  | 2021   | No  | NA   | 0  | 1 | Not-determined | Genome-fragment | NA | 0     |
| S12_extracted_k141_153837 | 1363   | No  | NA   | 0  | 1 | Not-determined | Genome-fragment | NA | 0     |
| S11_extracted_k141_64321  | 3830   | No  | NA   | 0  | 0 | Low-quality    | Genome-fragment | NA | 2.96  |
| S12_extracted_k141_153844 | 1440   | No  | NA   | 0  | 0 | Not-determined | Genome-fragment | NA | 0     |
| S12_extracted_k141_107391 | 1177   | No  | NA   | 0  | 2 | Not-determined | Genome-fragment | NA | 0     |
| S3_vs_k141_104112[full]   | 3831   | No  | NA   | 1  | 0 | Low-quality    | Genome-fragment | NA | 7.03  |
| S12_extracted_k141_35570  | 1502   | No  | NA   | 0  | 0 | Not-determined | Genome-fragment | NA | 0     |
| S16_extracted_139231      | 3831   | No  | NA   | 0  | 1 | Low-quality    | Genome-fragment | NA | 5.93  |
| S12_extracted_k141_186065 | 2722   | No  | NA   | 0  | 0 | Not-determined | Genome-fragment | NA | 0     |
| S12_extracted_k141_130135 | 1711   | No  | NA   | 0  | 0 | Not-determined | Genome-fragment | NA | 0     |
| S12_extracted_k141_59747  | 3741   | No  | NA   | 0  | 0 | Not-determined | Genome-fragment | NA | 0     |
| S8_extracted_k141_84032   | 3831   | No  | NA   | 0  | 1 | Low-quality    | Genome-fragment | NA | 9.66  |
| S12_extracted_k141_51444  | 6578   | No  | NA   | 0  | 6 | Not-determined | Genome-fragment | NA | 0     |
| S12_extracted_k141_130151 | 1272   | No  | NA   | 0  | 0 | Not-determined | Genome-fragment | NA | 0     |
| S11_extracted_k141_98899  | 3832   | No  | NA   | 0  | 0 | Low-quality    | Genome-fragment | NA | 9.48  |
| S12_extracted_k141_186086 | 9281   | No  | NA   | 0  | 3 | Not-determined | Genome-fragment | NA | 0     |
| S4_extracted_23741        | 3832   | No  | NA   | 0  | 1 | Low-quality    | Genome-fragment | NA | 9.84  |
| S12_extracted_k141_99768  | 1313   | No  | NA   | 0  | 2 | Not-determined | Genome-fragment | NA | 0     |
| S12_extracted_k141_186092 | 1169   | No  | NA   | 0  | 1 | Not-determined | Genome-fragment | NA | 0     |
| S17_vs_k141_175432[full]  | 3833   | No  | NA   | 0  | 1 | Low-quality    | Genome-fragment | NA | 1.08  |
| S12_extracted_k141_146360 | 1377   | No  | NA   | 0  | 1 | Not-determined | Genome-fragment | NA | 0     |
| S12_extracted_k141_67630  | 3109   | No  | NA   | 0  | 1 | Not-determined | Genome-fragment | NA | 0     |
| S12_extracted_k141_44753  | 1567   | No  | NA   | 0  | 2 | Not-determined | Genome-fragment | NA | 0     |
| S12_extracted_k141_153951 | 1019   | No  | NA   | 0  | 1 | Not-determined | Genome-fragment | NA | 0     |
| S12_extracted_k141_153963 | 1634   | No  | NA   | 0  | 1 | Not-determined | Genome-fragment | NA | 0     |
| S13_extracted_10920       | 3833   | No  | NA   | 2  | 0 | Low-quality    | Genome-fragment | NA | 2.42  |
| S12_extracted_k141_47672  | 1002   | No  | NA   | 0  | 1 | Not-determined | Genome-fragment | NA | 0     |
| S12_extracted_k141_20169  | 1067   | No  | NA   | 0  | 1 | Not-determined | Genome-fragment | NA | 0     |
| S12_extracted_k141_177088 | 1027   | No  | NA   | 0  | 0 | Not-determined | Genome-fragment | NA | 0     |
| S10_vs_k141_186159        | 1035   | No  | NA   | 0  | 0 | Not-determined | Genome-fragment | NA | 0     |
| S8_vs_k141_34655[full]    | 3833   | Yes | 2409 | 1  | 1 | Low-quality    | Genome-fragment | NA | 4.42  |
| S17_vs_k141_134830[full]  | 3834   | No  | NA   | 0  | 1 | Low-quality    | Genome-fragment | NA | 1.94  |
| S12_extracted_k141_99819  | 1573   | No  | NA   | 0  | 4 | Not-determined | Genome-fragment | NA | 0     |
| S12_extracted_k141_186174 | 2640   | No  | NA   | 0  | 2 | Not-determined | Genome-fragment | NA | 0     |
| S13_vs_58257[full]        | 3834   | No  | NA   | 0  | 2 | Low-quality    | Genome-fragment | NA | 1.96  |
| S12_extracted_k141_83290  | 5552   | No  | NA   | 0  | 3 | Not-determined | Genome-fragment | NA | 0     |
| S12_extracted_k141_107520 | 1427   | No  | NA   | 0  | 0 | Not-determined | Genome-fragment | NA | 0     |
| S12_extracted_k141_44809  | 1024   | No  | NA   | 0  | 0 | Not-determined | Genome-fragment | NA | 0     |
| S12_extracted_k141_11641  | 1134   | No  | NA   | 0  | 0 | Not-determined | Genome-fragment | NA | 0     |
| S12_extracted_k141_130247 | 1769   | No  | NA   | 0  | 1 | Not-determined | Genome-fragment | NA | 0     |
| S12_extracted_k141_162049 | 3453   | No  | NA   | 0  | 1 | Not-determined | Genome-fragment | NA | 0     |
| S12_extracted_k141_75166  | 1208   | No  | NA   | 0  | 0 | Not-determined | Genome-fragment | NA | 0     |
| S3_vs_k141_12245[full]    | 3834   | No  | NA   | 0  | 3 | Low-quality    | Genome-fragment | NA | 2.21  |
| S7_extracted_28007        | 3834   | No  | NA   | 3  | 0 | Low-quality    | Genome-fragment | NA | 7.35  |
| S7_extracted_35030        | 3834   | Yes | 1017 | 1  | 1 | Low-quality    | Genome-fragment | NA | 2.15  |
| S12_extracted_k141_20215  | 1334   | No  | NA   | 0  | 1 | Not-determined | Genome-fragment | NA | 73.47 |
| S12_extracted_k141_44835  | 1088   | No  | NA   | 0  | 0 | Not-determined | Genome-fragment | NA | 0     |
| S12_extracted_k141_162072 | 1511   | No  | NA   | 0  | 0 | Not-determined | Genome-fragment | NA | 0     |
| S12_extracted_k141_177164 | 1258   | No  | NA   | 0  | 0 | Not-determined | Genome-fragment | NA | 0     |
| S12_extracted_k141_154022 | 3349   | No  | NA   | 0  | 2 | Not-determined | Genome-fragment | NA | 0     |
| S12_extracted_k141_162088 | 2772   | No  | NA   | 0  | 1 | Not-determined | Genome-fragment | NA | 0     |
| S12_extracted_k141_11709  | 1014   | No  | NA   | 0  | 1 | Not-determined | Genome-fragment | NA | 0     |
| S12_extracted_k141_28421  | 1196   | No  | NA   | 0  | 1 | Not-determined | Genome-fragment | NA | 0     |
| S12_extracted_k141_169796 | 130066 | No  | NA   | 36 | 2 | High-quality   | High-quality    | NA | 98.19 |
| S10_vs_101981[full]       | 3834   | No  | NA   | 0  | 1 | Low-quality    | Genome-fragment | NA | 0.44  |
| S12_extracted_k141_51592  | 1194   | No  | NA   | 0  | 0 | Not-determined | Genome-fragment | NA | 0     |
| S12_extracted_k141_146469 | 1209   | No  | NA   | 0  | 0 | Not-determined | Genome-fragment | NA | 0     |
| S12_extracted_k141_51591  | 1034   | No  | NA   | 0  | 1 | Not-determined | Genome-fragment | NA | 0     |
| S12_extracted_k141_11717  | 2366   | No  | NA   | 0  | 0 | Not-determined | Genome-fragment | NA | 0     |
| S15_extracted_7319        | 3834   | No  | NA   | 0  | 0 | Low-quality    | Genome-fragment | NA | 5.18  |
| S12_extracted_k141_146474 | 1772   | No  | NA   | 0  | 0 | Not-determined | Genome-fragment | NA | 0     |
| S12_extracted_k141_75228  | 1411   | No  | NA   | 0  | 0 | Not-determined | Genome-fragment | NA | 0     |
| S12_extracted_k141_35793  | 7615   | No  | NA   | 0  | 3 | Not-determined | Genome-fragment | NA | 0     |
| S12_extracted_k141_186290 | 1524   | No  | NA   | 0  | 0 | Not-determined | Genome-fragment | NA | 0     |
| S9_vs_k141_76719[full]    | 3835   | No  | NA   | 0  | 0 | Low-quality    | Genome-fragment | NA | 6.37  |
| S12_extracted_k141_107597 | 3691   | No  | NA   | 0  | 2 | Not-determined | Genome-fragment | NA | 0     |
| S12_extracted_k141_122194 | 2538   | No  | NA   | 0  | 0 | Not-determined | Genome-fragment | NA | 0     |
| S12_extracted_k141_7523   | 1542   | No  | NA   | 0  | 0 | Not-determined | Genome-fragment | NA | 0     |
| S12_extracted_k141_11731  | 3710   | No  | NA   | 0  | 1 | Not-determined | Genome-fragment | NA | 0     |
| S12_extracted_k141_75252  | 1701   | No  | NA   | 0  | 2 | Not-determined | Genome-fragment | NA | 0     |
| S12_extracted_k141_107614 | 2904   | No  | NA   | 0  | 1 | Not-determined | Genome-fragment | NA | 0     |
| S12_vs_k141_143646[full]  | 3835   | No  | NA   | 1  | 0 | Low-quality    | Genome-fragment | NA | 1.77  |
| S12_extracted_k141_114662 | 1166   | No  | NA   | 0  | 1 | Not-determined | Genome-fragment | NA | 0     |
| S6_vs_k141_2495[full]     | 3836   | No  | NA   | 0  | 1 | Low-quality    | Genome-fragment | NA | 2.88  |
| S12_extracted_k141_99817  | 1114   | No  | NA   | 0  | 0 | Not-determined | Genome-fragment | NA | 0     |
| S12_extracted_k141_177257 | 1120   | No  | NA   | 0  | 2 | Not-determined | Genome-fragment | NA | 0     |
| S12_extracted_k141_15805  | 1245   | No  | NA   | 0  | 1 | Not-determined | Genome-fragment | NA | 0     |
| S12_extracted_k141_75281  | 1609   | No  | NA   | 0  | 0 | Not-determined | Genome-fragment | NA | 0     |
| S12_extracted_k141_122244 | 1859   | No  | NA   | 0  | 2 | Not-determined | Genome-fragment | NA | 0     |
| S12_extracted_k141_75299  | 1633   | No  | NA   | 0  | 0 | Not-determined | Genome-fragment | NA | 0     |
| S12_extracted_k141_154046 | 1089   | No  | NA   | 0  | 0 | Not-determined | Genome-fragment | NA | 0     |
| S12_extracted_k141_51676  | 1110   | No  | NA   | 0  | 1 | Not-determined | Genome-fragment | NA | 0     |
| S12_extracted_k141_28522  | 1144   | No  | NA   | 0  | 0 | Not-determined | Genome-fragment | NA | 0     |
| S1_extracted_k141_82020   | 3837   | Yes | 2421 | 2  | 1 | Low-quality    | Genome-fragment | NA | 4.99  |
| S12_extracted_k141_44919  | 1344   | No  | NA   | 0  | 1 | Not-determined | Genome-fragment | NA | 36.9  |
| S12_extracted_k141_177299 | 1561   | No  | NA   | 0  | 0 | Not-determined | Genome-fragment | NA | 0     |
| S12_extracted_k141_75322  | 1341   | No  | NA   | 0  | 0 | Not-determined | Genome-fragment | NA | 0     |
| S12_extracted_k141_28543  | 1118   | No  | NA   | 0  | 0 | Not-determined | Genome-fragment | NA | 0     |
| S7_extracted_105053       | 3838   | No  | NA   | 1  | 0 | Low-quality    | Genome-fragment | NA | 10.2  |
| S12_extracted_k141_107695 | 1059   | No  | NA   | 0  | 0 | Not-determined | Genome-fragment | NA | 0     |
| S12_extracted_k141_82437  | 1651   | No  | NA   | 0  | 1 | Not-determined | Genome-fragment | NA | 0     |
| S12_extracted_k141_107703 | 4915   | No  | NA   | 0  | 3 | Not-determined | Genome-fragment | NA | 0     |
| S12_extracted_k141_186359 | 1373   | No  | NA   | 0  | 1 | Not-determined | Genome-fragment | NA | 0     |
| S12_extracted_k141_146580 | 2799   | No  | NA   | 0  | 0 | Not-determined | Genome-fragment | NA | 0     |
| S12_extracted_k141_100025 | 1382   | No  | NA   | 0  | 1 | Not-determined | Genome-fragment | NA | 0     |
| S12_extracted_k141_100034 | 1166   | No  | NA   | 0  | 0 | Not-determined | Genome-fragment | NA | 0     |
| S12_extracted_k141_186378 | 2286   | No  | NA   | 0  | 1 | Not-determined | Genome-fragment | NA | 0     |
| S12_extracted_k141_146607 | 1814   | No  | NA   | 0  | 1 | Not-determined | Genome-fragment | NA | 0     |
| S5_extracted_k141_71699   | 3839   | No  | NA   | 0  | 0 | Low-quality    | Genome-fragment | NA | 6.82  |
| S12_extracted_38126       | 3840   | No  | NA   | 0  | 4 | Low-quality    | Genome-fragment | NA | 3.72  |
| S12_extracted_k141_130404 | 1194   | No  | NA   | 0  | 1 | Not-determined | Genome-fragment | NA | 0     |
| S12_extracted_k141_146626 | 1475   | No  | NA   | 0  | 0 | Not-determined | Genome-fragment | NA | 0     |
| S12_extracted_k141_75424  | 1665   | No  | NA   | 0  | 1 | Not-determined | Genome-fragment | NA | 0     |
| S12_extracted_k141_114830 | 2556   | No  | NA   | 0  | 1 | Not-determined | Genome-fragment | NA | 0     |
| S12_vs_k141_83511[full]   | 3840   | No  | NA   | 0  | 1 | Low-quality    | Genome-fragment | NA | 5.82  |
| S12_extracted_k141_107723 | 1511   | No  | NA   | 0  | 2 | Not-determined | Genome-fragment | NA | 0     |
| S12_extracted_k141_75435  | 3850   | No  | NA   | 0  | 2 | Not-determined | Genome-fragment | NA | 2.54  |
| S7_vs_110511[full]        | 3841   | No  | NA   | 0  | 2 | Low-quality    | Genome-fragment | NA | 0     |
| S12_extracted_k141_162291 | 1473   | No  | NA   | 0  | 1 | Not-determined | Genome-fragment | NA | 0     |
| S12_extracted_k141_138972 | 1155   | No  | NA   | 0  | 0 | Not-determined | Genome-fragment | NA | 0     |
| S12_extracted_k141_100103 | 7586   | No  | NA   | 0  | 1 | Not-determined | Genome-fragment | NA | 0     |
| S12_extracted_k141_83496  | 6854   | No  | NA   | 0  | 3 | Not-determined | Genome-fragment | NA | 0     |
| S12_extracted_k141_138980 | 1886   | No  | NA   | 0  | 1 | Not-determined | Genome-fragment | NA | 0     |
| S16_extracted_156501      | 3841   | No  | NA   | 3  | 0 | Low-quality    | Genome-fragment | NA | 4.25  |
| S16_vs_36292[full]        | 3841   | No  | NA   | 0  | 2 | Low-quality    | Genome-fragment | NA | 2.59  |
| S12_extracted_k141_114862 | 1061   | No  | NA   | 0  | 0 | Not-determined | Genome-fragment | NA | 0     |
| S12_extracted_k141_162318 | 1053   | No  | NA   | 0  | 1 | Not-determined | Genome-fragment | NA | 0     |
| S12_extracted_k141_75483  | 1159   | No  | NA   | 0  | 0 | Not-determined | Genome-fragment | NA | 0     |
| S12_extracted_k141_114876 | 1288   | No  | NA   | 0  | 1 | Not-determined | Genome-fragment | NA | 0     |
| S12_extracted_k141_83515  | 1458   | No  | NA   | 0  | 1 | Not-determined | Genome-fragment | NA | 0     |
| S12_extracted_k141_20541  | 208    |     |      |    |   |                |                 |    |       |



|                           |        |     |       |    |   |                |                 |                 |       |   |
|---------------------------|--------|-----|-------|----|---|----------------|-----------------|-----------------|-------|---|
| S12_extracted_k141_170103 | 1060   | No  | NA    | 0  | 1 | Not-determined | Genome-fragment | NA              | 0     |   |
| S12_extracted_k141_13991  | 1267   | No  | NA    | 0  | 1 | Not-determined | Genome-fragment | NA              | 0     |   |
| S12_extracted_k141_20631  | 1006   | No  | NA    | 0  | 0 | Not-determined | Genome-fragment | NA              | 0     |   |
| S10_vs_42933  full        | 3844   | No  | NA    | 0  | 3 | Low-quality    | Genome-fragment | NA              | 4.29  |   |
| S12_extracted_k141_20644  | 3014   | No  | NA    | 0  | 1 | Not-determined | Genome-fragment | NA              | 0     |   |
| S12_extracted_k141_10073  | 8099   | No  | NA    | 0  | 6 | Not-determined | Genome-fragment | NA              | 0     |   |
| S14_extracted_k141_88697  | 3846   | No  | NA    | 0  | 1 | Low-quality    | Genome-fragment | NA              | 2.18  |   |
| S12_extracted_k141_170135 | 1323   | No  | NA    | 0  | 2 | Not-determined | Genome-fragment | NA              | 0     |   |
| S12_extracted_k141_20651  | 2099   | No  | NA    | 0  | 0 | Not-determined | Genome-fragment | NA              | 0     |   |
| S12_extracted_k141_83567  | 1036   | No  | NA    | 0  | 1 | Not-determined | Genome-fragment | NA              | 0     |   |
| S12_extracted_k141_100301 | 2193   | No  | NA    | 0  | 0 | 1              | Not-determined  | Genome-fragment | NA    | 0 |
| S12_extracted_k141_45082  | 1708   | No  | NA    | 0  | 0 | Not-determined | Genome-fragment | NA              | 0     |   |
| S12_extracted_k141_186582 | 1418   | No  | NA    | 0  | 1 | Not-determined | Genome-fragment | NA              | 0     |   |
| S8_vs_k141_150197  full   | 3846   | No  | NA    | 4  | 0 | Low-quality    | Genome-fragment | NA              | 9.71  |   |
| S12_extracted_k141_177536 | 1221   | No  | NA    | 0  | 1 | Not-determined | Genome-fragment | NA              | 0     |   |
| S12_extracted_k141_67869  | 116083 | No  | NA    | 31 | 2 | Medium-quality | Genome-fragment | NA              | 79.42 |   |
| S12_extracted_k141_60224  | 54526  | Yes | 47561 | 11 | 5 | Complete       | High-quality    | 100             | 12.77 |   |
| S12_extracted_k141_12081  | 1566   | No  | NA    | 0  | 1 | Not-determined | Genome-fragment | NA              | 0     |   |
| S12_extracted_k141_7424   | 3847   | No  | NA    | 1  | 0 | Low-quality    | Genome-fragment | NA              | 8.58  |   |
| S12_extracted_k141_20723  | 1280   | No  | NA    | 0  | 0 | Not-determined | Genome-fragment | NA              | 0     |   |
| S12_extracted_k141_100364 | 1137   | No  | NA    | 0  | 1 | Not-determined | Genome-fragment | NA              | 0     |   |
| S12_extracted_k141_22206  | 8785   | No  | NA    | 0  | 4 | Not-determined | Genome-fragment | NA              | 0     |   |
| S12_extracted_k141_20726  | 3366   | No  | NA    | 0  | 1 | Not-determined | Genome-fragment | NA              | 0     |   |
| S11_vs_k141_81494  full   | 3848   | No  | NA    | 2  | 0 | Low-quality    | Genome-fragment | NA              | 10.27 |   |
| S12_extracted_k141_177542 | 1124   | No  | NA    | 0  | 1 | Not-determined | Genome-fragment | NA              | 0     |   |
| S10_extracted_2163        | 3848   | No  | NA    | 0  | 0 | Low-quality    | Genome-fragment | NA              | 9.37  |   |
| S12_extracted_k141_45132  | 3155   | No  | NA    | 0  | 1 | Not-determined | Genome-fragment | NA              | 0     |   |
| S12_extracted_k141_134985 | 5097   | No  | NA    | 0  | 4 | Not-determined | Genome-fragment | NA              | 0     |   |
| S8_extracted_k141_183537  | 3850   | No  | NA    | 0  | 0 | Low-quality    | Genome-fragment | NA              | 10.85 |   |
| S12_extracted_k141_186624 | 1154   | No  | NA    | 0  | 0 | Not-determined | Genome-fragment | NA              | 0     |   |
| S12_extracted_k141_45143  | 6614   | No  | NA    | 0  | 4 | Not-determined | Genome-fragment | NA              | 0     |   |
| S12_extracted_k141_100382 | 1811   | No  | NA    | 0  | 1 | Not-determined | Genome-fragment | NA              | 0     |   |
| S12_extracted_k141_130641 | 3271   | No  | NA    | 0  | 2 | Not-determined | Genome-fragment | NA              | 0     |   |
| S12_extracted_k141_100405 | 1201   | No  | NA    | 0  | 0 | Not-determined | Genome-fragment | NA              | 0     |   |
| S12_extracted_k141_154404 | 1295   | No  | NA    | 0  | 1 | Not-determined | Genome-fragment | NA              | 0     |   |
| S12_extracted_k141_139260 | 1039   | No  | NA    | 0  | 1 | Not-determined | Genome-fragment | NA              | 0     |   |
| S12_extracted_k141_67999  | 1077   | No  | NA    | 0  | 0 | 1              | Not-determined  | Genome-fragment | NA    | 0 |
| S12_extracted_k141_48864  | 3851   | No  | NA    | 0  | 0 | Low-quality    | Genome-fragment | NA              | 6.09  |   |
| S12_extracted_k141_100433 | 1119   | No  | NA    | 0  | 1 | Not-determined | Genome-fragment | NA              | 0     |   |
| S12_extracted_k141_36112  | 1179   | No  | NA    | 0  | 0 | Not-determined | Genome-fragment | NA              | 0     |   |
| S12_extracted_k141_28784  | 2166   | No  | NA    | 0  | 1 | Not-determined | Genome-fragment | NA              | 0     |   |
| S12_extracted_k141_154449 | 1453   | No  | NA    | 0  | 1 | Not-determined | Genome-fragment | NA              | 0     |   |
| S12_extracted_k141_107877 | 1107   | No  | NA    | 0  | 0 | Not-determined | Genome-fragment | NA              | 0     |   |
| S8_extracted_k141_165267  | 3851   | No  | NA    | 0  | 1 | Low-quality    | Genome-fragment | NA              | 8.25  |   |
| S12_extracted_k141_107884 | 8114   | No  | NA    | 0  | 3 | Not-determined | Genome-fragment | NA              | 0     |   |
| S12_extracted_k141_186691 | 6265   | No  | NA    | 0  | 4 | Not-determined | Genome-fragment | NA              | 0     |   |
| S12_extracted_k141_45208  | 1326   | No  | NA    | 0  | 0 | Not-determined | Genome-fragment | NA              | 0     |   |
| S12_extracted_k141_177649 | 1035   | No  | NA    | 0  | 2 | Not-determined | Genome-fragment | NA              | 5.74  |   |
| S1_vs_k141_120965  full   | 3853   | No  | NA    | 0  | 0 | Low-quality    | Genome-fragment | NA              | 7.16  |   |
| S12_vs_k141_93896  full   | 3854   | No  | NA    | 2  | 0 | Low-quality    | Genome-fragment | NA              | 0     |   |
| S12_extracted_k141_60240  | 3363   | No  | NA    | 0  | 3 | Not-determined | Genome-fragment | NA              | 0     |   |
| S12_extracted_k141_45217  | 1154   | No  | NA    | 0  | 1 | Not-determined | Genome-fragment | NA              | 0     |   |
| S12_extracted_k141_68041  | 1118   | No  | NA    | 0  | 0 | Not-determined | Genome-fragment | NA              | 0     |   |
| S17_extracted_k141_56346  | 3856   | No  | NA    | 0  | 0 | Low-quality    | Genome-fragment | NA              | 8.65  |   |
| S7_extracted_30211        | 3856   | No  | NA    | 0  | 3 | Low-quality    | Genome-fragment | NA              | 4.57  |   |
| S7_extracted_43107        | 3856   | No  | NA    | 0  | 0 | Low-quality    | Genome-fragment | NA              | 0.35  |   |
| S7_vs_118871  full        | 3856   | No  | NA    | 0  | 2 | Low-quality    | Genome-fragment | NA              | 2.91  |   |
| S12_extracted_k141_107916 | 1207   | No  | NA    | 0  | 0 | Not-determined | Genome-fragment | NA              | 0     |   |
| S12_extracted_k141_45237  | 1652   | No  | NA    | 0  | 1 | Not-determined | Genome-fragment | NA              | 0     |   |
| S12_extracted_k141_68074  | 1201   | No  | NA    | 0  | 1 | Not-determined | Genome-fragment | NA              | 0     |   |
| S12_extracted_k141_5614   | 1122   | No  | NA    | 0  | 1 | Not-determined | Genome-fragment | NA              | 0     |   |
| S12_extracted_k141_36116  | 1581   | No  | NA    | 0  | 2 | Not-determined | Genome-fragment | NA              | 0     |   |
| S11_extracted_k141_100581 | 3857   | No  | NA    | 0  | 1 | Low-quality    | Genome-fragment | NA              | 7.61  |   |
| S12_extracted_k141_28843  | 4666   | No  | NA    | 0  | 1 | Not-determined | Genome-fragment | NA              | 0     |   |
| S12_extracted_k141_130774 | 1425   | No  | NA    | 0  | 1 | Not-determined | Genome-fragment | NA              | 0     |   |
| S16_vs_36853  full        | 3857   | No  | NA    | 1  | 0 | Low-quality    | Genome-fragment | NA              | 1.14  |   |
| S12_extracted_k141_5638   | 1291   | No  | NA    | 0  | 1 | Not-determined | Genome-fragment | NA              | 0     |   |
| S17_vs_k141_110349  full  | 3858   | No  | NA    | 3  | 0 | Low-quality    | Genome-fragment | NA              | 9.14  |   |
| S11_vs_k141_89736  full   | 3858   | No  | NA    | 0  | 1 | Low-quality    | Genome-fragment | NA              | 10.78 |   |
| S12_extracted_k141_130797 | 1534   | No  | NA    | 0  | 3 | Not-determined | Genome-fragment | NA              | 0     |   |
| S12_extracted_k141_154548 | 1202   | No  | NA    | 0  | 0 | Not-determined | Genome-fragment | NA              | 0     |   |
| S12_extracted_k141_12211  | 1439   | No  | NA    | 0  | 1 | Not-determined | Genome-fragment | NA              | 0     |   |
| S12_extracted_k141_170393 | 4468   | No  | NA    | 0  | 1 | Not-determined | Genome-fragment | NA              | 0     |   |
| S12_extracted_k141_12214  | 1128   | No  | NA    | 0  | 1 | Not-determined | Genome-fragment | NA              | 0     |   |
| S12_extracted_k141_177709 | 3639   | No  | NA    | 0  | 4 | Not-determined | Genome-fragment | NA              | 0     |   |
| S12_extracted_k141_45283  | 1188   | No  | NA    | 0  | 1 | Not-determined | Genome-fragment | NA              | 0     |   |
| S12_extracted_k141_130815 | 1407   | No  | NA    | 0  | 1 | Not-determined | Genome-fragment | NA              | 0     |   |
| S12_extracted_k141_68109  | 8382   | No  | NA    | 0  | 5 | Not-determined | Genome-fragment | NA              | 0     |   |
| S12_extracted_k141_107984 | 1364   | No  | NA    | 0  | 1 | Not-determined | Genome-fragment | NA              | 0     |   |
| S12_extracted_k141_12232  | 1427   | No  | NA    | 0  | 1 | Not-determined | Genome-fragment | NA              | 0     |   |
| S12_extracted_k141_58885  | 4003   | No  | NA    | 0  | 2 | Not-determined | Genome-fragment | NA              | 0     |   |
| S12_extracted_k141_186820 | 1024   | No  | NA    | 0  | 1 | Not-determined | Genome-fragment | NA              | 0     |   |
| S12_extracted_k141_12248  | 1254   | No  | NA    | 0  | 1 | Not-determined | Genome-fragment | NA              | 0     |   |
| S12_extracted_k141_20769  | 1622   | No  | NA    | 0  | 2 | Not-determined | Genome-fragment | NA              | 0     |   |
| S12_extracted_k141_139387 | 1010   | No  | NA    | 0  | 0 | Not-determined | Genome-fragment | NA              | 0     |   |
| S5_vs_k141_23856  full    | 3858   | No  | NA    | 1  | 0 | Low-quality    | Genome-fragment | NA              | 5.69  |   |
| S12_extracted_k141_12261  | 1270   | No  | NA    | 0  | 1 | Not-determined | Genome-fragment | NA              | 0     |   |
| S12_extracted_k141_12270  | 1447   | No  | NA    | 0  | 1 | Not-determined | Genome-fragment | NA              | 0     |   |
| S12_extracted_k141_20779  | 5350   | No  | NA    | 0  | 1 | Not-determined | Genome-fragment | NA              | 0     |   |
| S16_vs_138981  full       | 3858   | No  | NA    | 1  | 0 | Low-quality    | Genome-fragment | NA              | 5.79  |   |
| S12_extracted_k141_12277  | 1063   | No  | NA    | 0  | 0 | Not-determined | Genome-fragment | NA              | 0     |   |
| S12_extracted_k141_17771  | 2154   | No  | NA    | 0  | 0 | Not-determined | Genome-fragment | NA              | 0     |   |
| S12_extracted_k141_170427 | 1382   | No  | NA    | 0  | 1 | Not-determined | Genome-fragment | NA              | 0     |   |
| S12_extracted_k141_60386  | 3326   | No  | NA    | 0  | 0 | Not-determined | Genome-fragment | NA              | 0     |   |
| S12_vs_k141_105226  full  | 3858   | No  | NA    | 0  | 0 | Low-quality    | Genome-fragment | NA              | 2.03  |   |
| S12_extracted_k141_154629 | 1103   | No  | NA    | 0  | 1 | Not-determined | Genome-fragment | NA              | 0     |   |
| S12_extracted_k141_92453  | 1286   | No  | NA    | 0  | 0 | Not-determined | Genome-fragment | NA              | 0     |   |
| S12_extracted_k141_151098 | 1236   | No  | NA    | 0  | 1 | Not-determined | Genome-fragment | NA              | 0     |   |
| S12_extracted_k141_68181  | 1274   | No  | NA    | 0  | 1 | Not-determined | Genome-fragment | NA              | 0     |   |
| S12_extracted_k141_83695  | 1076   | No  | NA    | 0  | 0 | Not-determined | Genome-fragment | NA              | 0     |   |
| S12_extracted_k141_139416 | 27145  | No  | NA    | 0  | 8 | Not-determined | Genome-fragment | NA              | 0     |   |
| S16_vs_67864  full        | 3859   | No  | NA    | 2  | 0 | Low-quality    | Genome-fragment | NA              | 2.03  |   |
| S12_extracted_k141_115120 | 1201   | No  | NA    | 0  | 1 | Not-determined | Genome-fragment | NA              | 0     |   |
| S12_vs_k141_134758  full  | 3859   | No  | NA    | 3  | 0 | Low-quality    | Genome-fragment | NA              | 7.56  |   |
| S12_extracted_k141_12340  | 1235   | No  | NA    | 0  | 1 | Not-determined | Genome-fragment | NA              | 0     |   |
| S12_extracted_k141_130889 | 1206   | No  | NA    | 0  | 0 | Not-determined | Genome-fragment | NA              | 0     |   |
| S12_extracted_k141_177826 | 1486   | No  | NA    | 0  | 1 | Not-determined | Genome-fragment | NA              | 0     |   |
| S11_vs_k141_50018  full   | 3860   | Yes | 2828  | 1  | 1 | Low-quality    | Genome-fragment | NA              | 1.82  |   |
| S12_extracted_k141_115154 | 1021   | No  | NA    | 0  | 1 | Not-determined | Genome-fragment | NA              | 26.74 |   |
| S12_extracted_k141_12371  | 3857   | No  | NA    | 0  | 2 | Not-determined | Genome-fragment | NA              | 0     |   |
| S13_extracted_13853       | 3860   | No  | NA    | 0  | 1 | Low-quality    | Genome-fragment | NA              | 1.92  |   |
| S12_extracted_k141_100595 | 3558   | No  | NA    | 0  | 0 | Not-determined | Genome-fragment | NA              | 0     |   |
| S12_extracted_k141_186966 | 1888   | No  | NA    | 0  | 0 | Not-determined | Genome-fragment | NA              | 0     |   |
| S12_extracted_k141_177898 | 1215   | No  | NA    | 0  | 1 | Not-determined | Genome-fragment | NA              | 0     |   |
| S12_extracted_k141_100613 | 1090   | No  | NA    | 0  | 0 | Not-determined | Genome-fragment | NA              | 0     |   |
| S12_extracted_k141_5834   | 1782   | No  | NA    | 0  | 0 | Not-determined | Genome-fragment | NA              | 0     |   |
| S10_vs_113717  full       | 3862   | No  | NA    | 4  | 0 | Low-quality    | Genome-fragment | NA              | 8.69  |   |
| S12_extracted_k141_47466  | 1205   | No  | NA    | 0  | 1 | Not-determined | Genome-fragment | NA              | 0     |   |
| S12_extracted_k141_20524  | 1284   | No  | NA    | 0  | 2 | Not-determined | Genome-fragment | NA              | 0     |   |
| S12_extracted_k141_186986 | 4679   | No  | NA    | 0  | 1 | Not-determined | Genome-fragment | NA              | 0     |   |
| S12_extracted_k141_130967 | 1182   | No  | NA    | 0  | 2 | Not-determined | Genome-fragment | NA              | 0     |   |
| S3_vs_k141_75870  full    | 3863   | No  | NA    | 0  | 0 | Low-quality    | Genome-fragment | NA              | 1.96  |   |
| S12_extracted_k141_36298  | 1101   | No  | NA    | 0  | 2 | Not-determined | Genome-fragment | NA              | 0     |   |
| S12_extracted_k141_154742 | 2256   | No  | NA    | 0  | 2 | Not-determined | Genome-fragment | NA              | 0     |   |
| S16_vs_162397  full       | 3863   | No  | NA    | 0  | 0 | Low-quality    | Genome-fragment | NA              | 9.99  |   |
| S6_vs_k141_28481  full    | 3863   | No  | NA    | 0  | 1 | Low-quality    | Genome-fragment | NA              | 1.65  |   |
| S17_vs_k141_172029  full  | 3864   | No  | NA    | 0  | 1 | Low-quality    | Genome-fragment | NA              | 12.34 |   |
| S14_vs_k141_83651  full   | 3864   | No  | NA    | 0  | 1 | Low-quality    | Genome-fragment | NA              | 6.05  |   |
| S12_extracted_k141_52402  | 1155   | No  | NA    | 0  | 0 | Not-determined | Genome-fragment | NA              | 0     |   |
| S12_extracted_k141_122889 | 2309   | No  | NA    | 0  | 0 | Not-determined | Genome-fragment | NA              | 0     |   |
| S12_extracted_k141_12449  | 3249   | No  | NA    | 0  | 1 | Not-determined | Genome-fragment | NA              | 1.63  |   |
| S6_extracted_k141_10220   | 3864   | No  | NA    | 0  | 1 | Low-quality    | Genome-fragment | NA              | 0     |   |
| S12_extracted_k141_115260 | 1120   | No  | NA    | 0  | 1 | Not-determined | Genome-fragment | NA              | 0     |   |
| S12_extracted_k141_187039 | 1211   | No  | NA    | 0  | 2 | Not-determined | Genome-fragment | NA              | 0     |   |
| S12_extracted_k141_177972 | 1286   | No  | NA    | 0  | 0 | Not-determined | Genome-fragment | NA              | 0     |   |
| S12_extracted_k141_52418  | 1143   | No  | NA    | 0  | 0 | Not-determined | Genome-fragment | NA              | 0     |   |
| S12_extracted_k141_177974 | 1152   | No  | NA    | 0  | 0 | Not-determined | Genome-fragment | NA              | 0     |   |
| S12_extracted_k141_68300  | 1286   | No  | NA    | 0  | 0 | Not-determined | Genome-fragment | NA              | 0     |   |
| S12_extracted_k141_20975  | 1486   | No  | NA    | 0  | 0 | Not-determined | Genome-fragment | NA              | 0     |   |
| S12_extracted_k141_122917 | 1293   | No  | NA    | 0  | 0 | Not-determined | Genome-fragment | NA              | 0     |   |
| S8_vs_k141_167559  full   | 3864   | No  | NA    | 0  | 2 | Low-quality    | Genome-fragment | NA              | 1.28  |   |
| S12_extracted_k141_20978  | 2412   | No  | NA    | 0  | 1 | Not-determined | Genome-fragment | NA              | 0     |   |
| S17_vs_k141_109261  full  | 3865   | No  | NA    | 0  | 3 | Low-quality    | Genome-fragment | NA              | 3.32  |   |
| S12_extracted_k141_60682  | 1058   | No  | NA    | 0  | 2 | Not-determined |                 |                 |       |   |



|                             |       |     |      |   |    |                |                 |       |       |
|-----------------------------|-------|-----|------|---|----|----------------|-----------------|-------|-------|
| S8_extracted_k141_43769     | 3870  | No  | NA   | 1 | 0  | Low-quality    | Genome-fragment | 9.77  | 0     |
| S12_extracted_k141_108259   | 1920  | No  | NA   | 0 | 2  | Not-determined | Genome-fragment | NA    | 0     |
| S11_extracted_k141_81522    | 3871  | No  | NA   | 1 | 0  | Low-quality    | Genome-fragment | 2.51  | 0     |
| S12_extracted_k141_100790   | 1134  | No  | NA   | 0 | 1  | Not-determined | Genome-fragment | NA    | 0     |
| S12_extracted_k141_170594   | 1002  | No  | NA   | 0 | 0  | Not-determined | Genome-fragment | NA    | 0     |
| S7_vs_k141_122594  full     | 3871  | No  | NA   | 4 | 0  | Low-quality    | Genome-fragment | 10.37 | 0     |
| S12_extracted_k141_170597   | 2219  | No  | NA   | 0 | 0  | Not-determined | Genome-fragment | NA    | 0     |
| S12_extracted_k141_76222    | 1072  | No  | NA   | 0 | 0  | Not-determined | Genome-fragment | NA    | 0     |
| S12_extracted_k141_100804   | 1821  | No  | NA   | 0 | 1  | Not-determined | Genome-fragment | NA    | 0     |
| S12_extracted_k141_36416    | 1404  | No  | NA   | 0 | 0  | Not-determined | Genome-fragment | NA    | 0     |
| S12_extracted_k141_187177   | 1066  | No  | NA   | 0 | 1  | Not-determined | Genome-fragment | NA    | 0     |
| S12_extracted_k141_139866   | 1227  | No  | NA   | 0 | 0  | Not-determined | Genome-fragment | NA    | 0     |
| S12_extracted_k141_123041   | 1483  | No  | NA   | 0 | 1  | Not-determined | Genome-fragment | NA    | 0     |
| S12_extracted_k141_147265   | 1943  | No  | NA   | 0 | 1  | Not-determined | Genome-fragment | NA    | 0     |
| S12_extracted_k141_170613   | 3545  | No  | NA   | 0 | 2  | Not-determined | Genome-fragment | NA    | 0     |
| S12_vs_k141_181528  full    | 3871  | No  | NA   | 0 | 1  | Low-quality    | Genome-fragment | 7.24  | 0     |
| S12_extracted_k141_60665    | 2874  | No  | NA   | 0 | 1  | Not-determined | Genome-fragment | NA    | 0     |
| S12_extracted_k141_139714   | 1646  | No  | NA   | 0 | 0  | Not-determined | Genome-fragment | NA    | 0     |
| S12_extracted_k141_68411    | 3588  | No  | NA   | 0 | 0  | Not-determined | Genome-fragment | NA    | 0     |
| S12_extracted_k141_170614   | 16108 | No  | NA   | 6 | 0  | Medium-quality | Genome-fragment | 69.63 | 0     |
| S12_extracted_k141_45681    | 1210  | No  | NA   | 0 | 0  | Not-determined | Genome-fragment | NA    | 0     |
| S12_extracted_k141_170628   | 1955  | No  | NA   | 0 | 2  | Not-determined | Genome-fragment | NA    | 0     |
| S12_extracted_k141_12613    | 2662  | No  | NA   | 0 | 1  | Not-determined | Genome-fragment | NA    | 0     |
| S12_extracted_k141_21094    | 1465  | No  | NA   | 0 | 1  | Not-determined | Genome-fragment | NA    | 0     |
| S12_extracted_k141_139751   | 8484  | No  | NA   | 0 | 4  | Not-determined | Genome-fragment | NA    | 0     |
| S8_vs_k141_16447  full      | 3871  | No  | NA   | 0 | 1  | Low-quality    | Genome-fragment | 7.43  | 0     |
| S12_extracted_k141_139757   | 1494  | No  | NA   | 0 | 1  | Not-determined | Genome-fragment | NA    | 0     |
| S12_extracted_k141_68457    | 1015  | No  | NA   | 0 | 1  | Not-determined | Genome-fragment | NA    | 0     |
| S12_extracted_k141_92700    | 2758  | No  | NA   | 0 | 1  | Not-determined | Genome-fragment | NA    | 0     |
| S5_vs_k141_32305  full      | 3872  | No  | NA   | 0 | 0  | Low-quality    | Genome-fragment | 5.26  | 0     |
| S5_vs_k141_73522  112genome | 3872  | No  | NA   | 1 | 0  | Low-quality    | Genome-fragment | 3.46  | 0     |
| S12_extracted_k141_11542    | 1235  | No  | NA   | 0 | 1  | Not-determined | Genome-fragment | NA    | 0     |
| S12_extracted_k141_162852   | 1233  | No  | NA   | 0 | 1  | Not-determined | Genome-fragment | NA    | 0     |
| S12_extracted_k141_162853   | 1051  | No  | NA   | 0 | 0  | Not-determined | Genome-fragment | NA    | 0     |
| S12_extracted_k141_21153    | 1002  | No  | NA   | 0 | 2  | Not-determined | Genome-fragment | NA    | 0     |
| S12_extracted_k141_115454   | 6843  | No  | NA   | 0 | 1  | Not-determined | Genome-fragment | NA    | 0     |
| S12_extracted_k141_21157    | 2921  | No  | NA   | 0 | 1  | Not-determined | Genome-fragment | NA    | 0     |
| S12_extracted_k141_108398   | 1127  | No  | NA   | 0 | 1  | Not-determined | Genome-fragment | NA    | 0     |
| S12_extracted_k141_100919   | 1408  | No  | NA   | 0 | 1  | Not-determined | Genome-fragment | NA    | 0     |
| S12_extracted_k141_68524    | 1204  | No  | NA   | 0 | 0  | Not-determined | Genome-fragment | NA    | 0     |
| S12_extracted_k141_115498   | 1543  | No  | NA   | 0 | 0  | Not-determined | Genome-fragment | NA    | 0     |
| S12_extracted_k141_12719    | 1101  | No  | NA   | 0 | 1  | Not-determined | Genome-fragment | NA    | 0     |
| S12_extracted_k141_178293   | 2654  | No  | NA   | 0 | 4  | Not-determined | Genome-fragment | NA    | 0     |
| S12_extracted_k141_115513   | 1619  | No  | NA   | 0 | 1  | Not-determined | Genome-fragment | NA    | 0     |
| S12_extracted_k141_170744   | 1555  | No  | NA   | 0 | 0  | Not-determined | Genome-fragment | NA    | 0     |
| S12_extracted_k141_92779    | 1428  | No  | NA   | 0 | 0  | Not-determined | Genome-fragment | NA    | 0     |
| S1_extracted_k141_5274      | 3874  | No  | NA   | 7 | 0  | Low-quality    | Genome-fragment | 8.84  | 0     |
| S12_extracted_k141_92782    | 1898  | No  | NA   | 0 | 0  | Not-determined | Genome-fragment | NA    | 0     |
| S12_extracted_k141_100859   | 34914 | No  | NA   | 0 | 1  | Not-determined | Genome-fragment | NA    | 0     |
| S12_extracted_k141_68585    | 1868  | No  | NA   | 0 | 2  | Not-determined | Genome-fragment | NA    | 0     |
| S12_extracted_k141_84033    | 1028  | No  | NA   | 0 | 1  | Not-determined | Genome-fragment | NA    | 0     |
| S12_extracted_k141_139852   | 1128  | No  | NA   | 0 | 1  | Not-determined | Genome-fragment | NA    | 0     |
| S12_extracted_k141_12737    | 5060  | No  | NA   | 0 | 1  | Not-determined | Genome-fragment | NA    | 0     |
| S12_extracted_k141_132319   | 3344  | No  | NA   | 0 | 2  | Not-determined | Genome-fragment | NA    | 0     |
| S12_extracted_k141_84051    | 1658  | No  | NA   | 0 | 0  | Not-determined | Genome-fragment | NA    | 0     |
| S12_extracted_k141_92837    | 3651  | No  | NA   | 0 | 2  | Not-determined | Genome-fragment | NA    | 0     |
| S14_extracted_k141_111095   | 3875  | No  | NA   | 9 | 0  | Low-quality    | Genome-fragment | 12.73 | 0     |
| S12_extracted_k141_114707   | 1050  | No  | NA   | 0 | 0  | Not-determined | Genome-fragment | NA    | 0     |
| S12_extracted_k141_21286    | 1385  | No  | NA   | 0 | 1  | Not-determined | Genome-fragment | NA    | 0     |
| S12_extracted_k141_29196    | 3709  | No  | NA   | 0 | 4  | Not-determined | Genome-fragment | NA    | 0     |
| S12_extracted_k141_92852    | 1114  | No  | NA   | 0 | 2  | Not-determined | Genome-fragment | NA    | 0     |
| S12_extracted_k141_92921    | 4875  | No  | NA   | 0 | 0  | Not-determined | Genome-fragment | NA    | 0     |
| S12_extracted_k141_92858    | 3696  | No  | NA   | 0 | 1  | Not-determined | Genome-fragment | NA    | 0     |
| S7_extracted_32294          | 3876  | No  | NA   | 1 | 0  | Low-quality    | Genome-fragment | 3.04  | 0     |
| S12_extracted_k141_101048   | 5393  | No  | NA   | 2 | 2  | Not-determined | Genome-fragment | NA    | 0     |
| S12_extracted_k141_178367   | 1024  | No  | NA   | 0 | 0  | Not-determined | Genome-fragment | NA    | 0     |
| S12_extracted_k141_6155     | 3292  | No  | NA   | 0 | 0  | Not-determined | Genome-fragment | NA    | 0     |
| S12_extracted_k141_29224    | 1026  | No  | NA   | 0 | 1  | Not-determined | Genome-fragment | NA    | 0     |
| S12_extracted_k141_36536    | 5944  | No  | NA   | 0 | 1  | Not-determined | Genome-fragment | NA    | 0     |
| S12_extracted_k141_131284   | 1162  | No  | NA   | 0 | 1  | Not-determined | Genome-fragment | NA    | 0     |
| S12_extracted_k141_163008   | 1079  | No  | NA   | 0 | 1  | Not-determined | Genome-fragment | NA    | 0     |
| S12_extracted_k141_21339    | 1063  | No  | NA   | 0 | 2  | Not-determined | Genome-fragment | NA    | 0     |
| S12_extracted_k141_60909    | 1910  | No  | NA   | 0 | 0  | Not-determined | Genome-fragment | NA    | 0     |
| S12_extracted_k141_187333   | 10188 | No  | NA   | 0 | 1  | Not-determined | Genome-fragment | NA    | 0     |
| S12_extracted_k141_147516   | 3304  | No  | NA   | 0 | 1  | Not-determined | Genome-fragment | NA    | 0     |
| S12_extracted_k141_101088   | 1683  | No  | NA   | 0 | 0  | Not-determined | Genome-fragment | NA    | 0     |
| S12_extracted_k141_178396   | 1018  | No  | NA   | 0 | 1  | Not-determined | Genome-fragment | NA    | 0     |
| S12_extracted_k141_147564   | 1042  | No  | NA   | 0 | 1  | Not-determined | Genome-fragment | NA    | 0     |
| S12_extracted_k141_108511   | 3450  | No  | NA   | 0 | 1  | Not-determined | Genome-fragment | NA    | 0     |
| S12_extracted_k141_29270    | 1079  | No  | NA   | 0 | 0  | Not-determined | Genome-fragment | NA    | 0     |
| S12_extracted_k141_6194     | 3107  | No  | NA   | 0 | 0  | Not-determined | Genome-fragment | NA    | 0     |
| S12_extracted_k141_36588    | 1329  | No  | NA   | 0 | 0  | Not-determined | Genome-fragment | NA    | 0     |
| S12_extracted_k141_147589   | 1491  | No  | NA   | 0 | 0  | Not-determined | Genome-fragment | NA    | 0     |
| S12_extracted_k141_155072   | 1188  | No  | NA   | 0 | 0  | Not-determined | Genome-fragment | NA    | 0     |
| S12_extracted_k141_123365   | 5424  | No  | NA   | 0 | 1  | Not-determined | Genome-fragment | NA    | 0     |
| S12_extracted_k141_6226     | 1283  | No  | NA   | 0 | 1  | Not-determined | Genome-fragment | NA    | 0     |
| S12_extracted_k141_139993   | 1830  | No  | NA   | 0 | 2  | Not-determined | Genome-fragment | NA    | 0     |
| S12_extracted_k141_131336   | 9058  | No  | NA   | 0 | 4  | Not-determined | Genome-fragment | NA    | 0     |
| S12_extracted_k141_155074   | 5835  | No  | NA   | 0 | 1  | Not-determined | Genome-fragment | NA    | 0     |
| S17_extracted_k141_69254    | 3877  | No  | NA   | 0 | 0  | Low-quality    | Genome-fragment | 3.92  | 0     |
| S12_extracted_k141_178430   | 1156  | No  | NA   | 0 | 2  | Not-determined | Genome-fragment | NA    | 0     |
| S12_extracted_k141_9414     | 4198  | No  | NA   | 0 | 0  | Not-determined | Genome-fragment | NA    | 0     |
| S12_extracted_k141_68684    | 1199  | No  | NA   | 0 | 0  | Not-determined | Genome-fragment | NA    | 0     |
| S5_extracted_k141_101052    | 3877  | No  | NA   | 0 | 0  | Low-quality    | Genome-fragment | 2.28  | 0     |
| S16_extracted_57404         | 3877  | No  | NA   | 1 | 0  | Low-quality    | Genome-fragment | 5.51  | 0     |
| S11_vs_k141_22143  full     | 3878  | No  | NA   | 1 | 0  | Low-quality    | Genome-fragment | NA    | 0     |
| S12_extracted_k141_45899    | 1973  | No  | NA   | 0 | 0  | Not-determined | Genome-fragment | NA    | 0     |
| S12_extracted_k141_155105   | 1145  | No  | NA   | 0 | 1  | Not-determined | Genome-fragment | NA    | 0     |
| S10_vs_S1649  full          | 3879  | No  | NA   | 0 | 1  | Low-quality    | Genome-fragment | 8.25  | 0     |
| S12_extracted_k141_123411   | 1195  | No  | NA   | 0 | 0  | Not-determined | Genome-fragment | NA    | 0     |
| S17_extracted_k141_111237   | 3880  | Yes | 2909 | 1 | 1  | Low-quality    | Genome-fragment | 3.55  | 25.03 |
| S12_extracted_k141_84195    | 1216  | No  | NA   | 0 | 0  | Not-determined | Genome-fragment | NA    | 0     |
| S12_extracted_k141_140045   | 1140  | No  | NA   | 0 | 0  | Not-determined | Genome-fragment | NA    | 0     |
| S12_extracted_k141_108596   | 1307  | No  | NA   | 0 | 1  | Not-determined | Genome-fragment | NA    | 0     |
| S11_extracted_k141_3834     | 3880  | No  | NA   | 0 | 1  | Low-quality    | Genome-fragment | 7.56  | 0     |
| S12_extracted_k141_108612   | 1278  | No  | NA   | 0 | 1  | Not-determined | Genome-fragment | NA    | 0     |
| S12_extracted_k141_6269     | 1140  | No  | NA   | 0 | 0  | Not-determined | Genome-fragment | NA    | 0     |
| S12_extracted_k141_163119   | 1627  | No  | NA   | 0 | 0  | Not-determined | Genome-fragment | NA    | 0     |
| S12_extracted_k141_36652    | 5414  | No  | NA   | 0 | 1  | Not-determined | Genome-fragment | NA    | 0     |
| S12_extracted_k141_84235    | 1135  | No  | NA   | 0 | 0  | Not-determined | Genome-fragment | NA    | 0     |
| S12_extracted_k141_76495    | 1127  | No  | NA   | 0 | 1  | Not-determined | Genome-fragment | NA    | 0     |
| S12_extracted_k141_101195   | 1018  | No  | NA   | 0 | 0  | Not-determined | Genome-fragment | NA    | 0     |
| S12_extracted_k141_178512   | 1043  | No  | NA   | 0 | 1  | Not-determined | Genome-fragment | NA    | 0     |
| S12_extracted_k141_178521   | 1264  | No  | NA   | 0 | 1  | Not-determined | Genome-fragment | NA    | 0     |
| S12_extracted_k141_147652   | 1463  | No  | NA   | 0 | 0  | Not-determined | Genome-fragment | NA    | 0     |
| S11_vs_k141_47286  full     | 3881  | No  | NA   | 0 | 0  | Low-quality    | Genome-fragment | 5.5   | 0     |
| S12_extracted_k141_178524   | 1339  | No  | NA   | 0 | 2  | Not-determined | Genome-fragment | NA    | 0     |
| S6_extracted_k141_25312     | 3881  | No  | NA   | 0 | 1  | Low-quality    | Genome-fragment | 4.01  | 0     |
| S12_extracted_k141_178529   | 1001  | No  | NA   | 0 | 0  | Not-determined | Genome-fragment | NA    | 0     |
| S12_extracted_k141_68765    | 3941  | No  | NA   | 0 | 5  | Not-determined | Genome-fragment | NA    | 0     |
| S12_extracted_k141_21438    | 2596  | No  | NA   | 0 | 1  | Not-determined | Genome-fragment | NA    | 0     |
| S12_extracted_k141_36685    | 2202  | No  | NA   | 0 | 1  | Not-determined | Genome-fragment | NA    | 0     |
| S13_vs_S1473  full          | 3882  | No  | NA   | 0 | 1  | Low-quality    | Genome-fragment | 1.82  | 0     |
| S5_vs_k141_3684  full       | 3882  | Yes | 2372 | 1 | 1  | Low-quality    | Genome-fragment | 0.319 | 38.9  |
| S12_extracted_k141_115636   | 1183  | No  | NA   | 2 | 1  | Not-determined | Genome-fragment | NA    | 0     |
| S12_extracted_k141_115644   | 1294  | No  | NA   | 0 | 1  | Not-determined | Genome-fragment | NA    | 0     |
| S12_extracted_k141_155170   | 4172  | No  | NA   | 0 | 3  | Not-determined | Genome-fragment | NA    | 0     |
| S12_extracted_k141_101213   | 1325  | No  | NA   | 0 | 0  | Not-determined | Genome-fragment | NA    | 0     |
| S12_extracted_k141_61068    | 1200  | No  | NA   | 0 | 1  | Not-determined | Genome-fragment | NA    | 0     |
| S12_extracted_k141_115650   | 1527  | No  | NA   | 0 | 0  | Not-determined | Genome-fragment | NA    | 0     |
| S12_extracted_k141_155175   | 6407  | No  | NA   | 0 | 1  | Not-determined | Genome-fragment | NA    | 0     |
| S12_extracted_k141_108607   | 1009  | No  | NA   | 0 | 0  | Not-determined | Genome-fragment | NA    | 0     |
| S12_extracted_k141_36711    | 1108  | No  | NA   | 0 | 1  | Not-determined | Genome-fragment | NA    | 0     |
| S12_extracted_k141_12895    | 1578  | No  | NA   | 0 | 0  | Not-determined | Genome-fragment | NA    | 0     |
| S12_extracted_k141_36715    | 1092  | No  | NA   | 0 | 1  | Not-determined | Genome-fragment | NA    | 0     |
| S12_extracted_k141_108674   | 5413  | No  | NA   | 0 | 1  | Not-determined | Genome-fragment | NA    | 0     |
| S12_extracted_k141_170988   | 1316  | No  | NA   | 0 | 2  | Not-determined | Genome-fragment | NA    | 0     |
| S7_extracted_40204          | 3884  | No  | NA   | 2 | 0  | Low-quality    | Genome-fragment | 8.38  | 0     |
| S12_extracted_k141_68788    | 25886 | No  | NA   | 0 | 17 | Not-determined | Genome-fragment | NA    | 0     |
| S12_extracted_k141_29446    | 1215  | No  | NA   | 0 | 1  | Not-determined | Genome-fragment | NA    | 0     |
| S12_extracted_k141_155194   | 5081  | No  | NA   | 0 | 0  | Not-determined | Genome-fragment | NA    | 0     |
| S12_extracted_k141_123542   | 1201  | No  | NA   | 0 | 0  | Not-determined | Genome-fragment | NA    | 0     |
| S12_extracted_k141_171014   | 1242  | No  | NA   | 0 | 0  | Not-determined | Genome-fragment | NA    | 0     |
| S12_extracted_k141_147719   | 1554  | No  | NA   | 0 | 0  | Not-determined | Genome-fragment | NA    | 0     |
|                             |       |     |      |   |    |                |                 |       |       |



|                           |       |    |   |    |                |                 |       |       |
|---------------------------|-------|----|---|----|----------------|-----------------|-------|-------|
| S3_vs_k141_53905[full]    | 3889  | NA | 2 | 0  | Low-quality    | Genome-fragment | 10.58 | 0     |
| S12_extracted_k141_187579 | 2185  | NA | 0 | 0  | Not-determined | Genome-fragment | NA    | 0     |
| S12_extracted_k141_36866  | 4101  | NA | 0 | 0  | Not-determined | Genome-fragment | NA    | 0     |
| S12_extracted_k141_13055  | 1147  | NA | 0 | 1  | Not-determined | Genome-fragment | NA    | 0     |
| S16_vs_34766[full]        | 3889  | NA | 0 | 2  | Low-quality    | Genome-fragment | 2.04  | 0     |
| S12_extracted_k141_36877  | 1222  | NA | 0 | 0  | Not-determined | Genome-fragment | NA    | 0     |
| S12_extracted_k141_36881  | 1007  | NA | 0 | 1  | Not-determined | Genome-fragment | NA    | 0     |
| S12_extracted_k141_17862  | 1049  | NA | 0 | 1  | Not-determined | Genome-fragment | NA    | 0     |
| S12_extracted_k141_68904  | 1060  | NA | 0 | 1  | Not-determined | Genome-fragment | NA    | 0     |
| S12_extracted_k141_46173  | 1193  | NA | 0 | 0  | Not-determined | Genome-fragment | NA    | 0     |
| S12_extracted_k141_61178  | 16204 | NA | 0 | 30 | Not-determined | Genome-fragment | NA    | 0     |
| S16_vs_143328[full]       | 3889  | NA | 0 | 2  | Low-quality    | Genome-fragment | 2.52  | 0     |
| S12_extracted_k141_178705 | 1506  | NA | 0 | 2  | Not-determined | Genome-fragment | NA    | 0     |
| S12_extracted_k141_84436  | 1777  | NA | 0 | 0  | Not-determined | Genome-fragment | NA    | 0     |
| S12_extracted_k141_171138 | 2628  | NA | 0 | 2  | Not-determined | Genome-fragment | NA    | 0     |
| S12_extracted_k141_101495 | 4604  | NA | 0 | 4  | Not-determined | Genome-fragment | NA    | 0     |
| S12_extracted_k141_115833 | 1074  | NA | 0 | 1  | Not-determined | Genome-fragment | NA    | 0     |
| S11_extracted_k141_69553  | 3890  | NA | 1 | 0  | Low-quality    | Genome-fragment | 1.34  | 0     |
| S12_extracted_k141_13146  | 4823  | NA | 0 | 2  | Not-determined | Genome-fragment | NA    | 0     |
| S12_extracted_k141_21582  | 3047  | NA | 0 | 0  | Not-determined | Genome-fragment | NA    | 0     |
| S12_extracted_k141_115848 | 1514  | NA | 0 | 3  | Not-determined | Genome-fragment | NA    | 0     |
| S12_extracted_k141_163374 | 1053  | NA | 0 | 1  | Not-determined | Genome-fragment | NA    | 0     |
| S12_extracted_k141_76757  | 1464  | NA | 0 | 1  | Not-determined | Genome-fragment | NA    | 0     |
| S12_extracted_k141_76760  | 1417  | NA | 0 | 0  | Not-determined | Genome-fragment | NA    | 0     |
| S12_extracted_k141_13200  | 1571  | NA | 0 | 1  | Not-determined | Genome-fragment | NA    | 0     |
| S12_extracted_k141_163405 | 4017  | NA | 0 | 2  | Not-determined | Genome-fragment | NA    | 0     |
| S13_extracted_84830       | 3890  | NA | 0 | 1  | Low-quality    | Genome-fragment | 6.41  | 0     |
| S12_extracted_k141_53001  | 2285  | NA | 0 | 0  | Not-determined | Genome-fragment | NA    | 0     |
| S12_extracted_k141_140444 | 5682  | NA | 0 | 0  | Not-determined | Genome-fragment | NA    | 0     |
| S12_extracted_k141_13225  | 1858  | NA | 0 | 1  | Not-determined | Genome-fragment | NA    | 0     |
| S12_extracted_k141_37010  | 2845  | NA | 0 | 2  | Not-determined | Genome-fragment | NA    | 0     |
| S12_extracted_k141_147874 | 1070  | NA | 0 | 1  | Not-determined | Genome-fragment | NA    | 0     |
| S12_extracted_k141_69025  | 1728  | NA | 0 | 0  | Not-determined | Genome-fragment | NA    | 0     |
| S12_extracted_k141_131732 | 1331  | NA | 0 | 1  | Not-determined | Genome-fragment | NA    | 0     |
| S12_extracted_k141_76781  | 1088  | NA | 0 | 1  | Not-determined | Genome-fragment | NA    | 0     |
| S12_extracted_k141_76787  | 1025  | NA | 0 | 0  | Not-determined | Genome-fragment | NA    | 0     |
| S12_extracted_k141_29652  | 2694  | NA | 0 | 0  | Not-determined | Genome-fragment | NA    | 0     |
| S14_vs_k141_97846[full]   | 3890  | NA | 0 | 0  | Low-quality    | Genome-fragment | 2.64  | 0     |
| S12_extracted_k141_131748 | 1097  | NA | 0 | 1  | Not-determined | Genome-fragment | NA    | 0     |
| S12_extracted_k141_53039  | 1024  | NA | 0 | 0  | Not-determined | Genome-fragment | NA    | 0     |
| S12_extracted_k141_140475 | 1778  | NA | 0 | 1  | Not-determined | Genome-fragment | NA    | 0     |
| S12_extracted_k141_29664  | 1877  | NA | 0 | 1  | Not-determined | Genome-fragment | NA    | 0     |
| S12_extracted_k141_6528   | 1040  | NA | 0 | 2  | Not-determined | Genome-fragment | NA    | 0     |
| S7_extracted_91298        | 3891  | NA | 0 | 0  | Low-quality    | Genome-fragment | 9.09  | 0     |
| S12_extracted_k141_61269  | 16337 | NA | 6 | 0  | Medium-quality | Genome-fragment | 69.2  | 0     |
| S12_extracted_k141_115915 | 2618  | NA | 0 | 2  | Not-determined | Genome-fragment | NA    | 0     |
| S12_extracted_k141_140486 | 2340  | NA | 0 | 3  | Not-determined | Genome-fragment | NA    | 0     |
| S12_extracted_k141_13270  | 1246  | NA | 0 | 1  | Not-determined | Genome-fragment | NA    | 0     |
| S12_extracted_k141_108817 | 1001  | NA | 0 | 0  | Not-determined | Genome-fragment | NA    | 0     |
| S12_extracted_k141_131772 | 1185  | NA | 0 | 1  | Not-determined | Genome-fragment | NA    | 0     |
| S12_extracted_k141_61325  | 3163  | NA | 0 | 2  | Not-determined | Genome-fragment | NA    | 0     |
| S7_vs_k141_844[full]      | 3892  | NA | 0 | 0  | Low-quality    | Genome-fragment | 9.51  | 0     |
| S7_vs_30678[full]         | 3892  | NA | 3 | 0  | Low-quality    | Genome-fragment | 11.37 | 0     |
| S12_extracted_k141_61331  | 1202  | NA | 0 | 0  | Not-determined | Genome-fragment | NA    | 0     |
| S12_extracted_k141_27082  | 3586  | NA | 0 | 1  | Not-determined | Genome-fragment | NA    | 0     |
| S12_extracted_k141_6558   | 1099  | NA | 0 | 0  | Not-determined | Genome-fragment | NA    | 0     |
| S12_extracted_k141_76840  | 1229  | NA | 0 | 0  | Not-determined | Genome-fragment | NA    | 0     |
| S12_extracted_k141_76859  | 1085  | NA | 0 | 2  | Not-determined | Genome-fragment | NA    | 0     |
| S12_extracted_k141_163479 | 2585  | NA | 0 | 1  | Not-determined | Genome-fragment | NA    | 0     |
| S12_extracted_k141_53102  | 1142  | NA | 0 | 1  | Not-determined | Genome-fragment | NA    | 0     |
| S12_extracted_k141_61369  | 9076  | NA | 0 | 4  | Not-determined | Genome-fragment | NA    | 0     |
| S12_extracted_k141_53111  | 1269  | NA | 0 | 0  | Not-determined | Genome-fragment | NA    | 0     |
| S12_extracted_k141_46327  | 4125  | NA | 0 | 3  | Not-determined | Genome-fragment | NA    | 0     |
| S6_vs_k141_37696[full]    | 3892  | NA | 0 | 3  | Low-quality    | Genome-fragment | 2.52  | 0     |
| S12_extracted_k141_93253  | 1098  | NA | 0 | 0  | Not-determined | Genome-fragment | NA    | 0     |
| S12_extracted_k141_187842 | 1752  | NA | 0 | 0  | Not-determined | Genome-fragment | NA    | 0     |
| S12_extracted_k141_109014 | 3202  | NA | 0 | 0  | Not-determined | Genome-fragment | NA    | 0     |
| S14_vs_k141_89000[full]   | 3895  | NA | 2 | 0  | Low-quality    | Genome-fragment | 7.26  | 0     |
| S12_extracted_k141_17132  | 1190  | NA | 0 | 0  | Not-determined | Genome-fragment | NA    | 0     |
| S12_extracted_k141_101688 | 2353  | NA | 0 | 2  | Not-determined | Genome-fragment | NA    | 0     |
| S12_extracted_k141_76908  | 1227  | NA | 0 | 1  | Not-determined | Genome-fragment | NA    | 0     |
| S12_extracted_k141_76912  | 2604  | NA | 0 | 1  | Not-determined | Genome-fragment | NA    | 0     |
| S12_extracted_k141_46356  | 7618  | NA | 0 | 5  | Not-determined | Genome-fragment | NA    | 0     |
| S7_vs_30429[full]         | 3895  | NA | 0 | 2  | Low-quality    | Genome-fragment | 4.14  | 0     |
| S7_vs_76693[full]         | 3895  | NA | 0 | 0  | Low-quality    | Genome-fragment | 2.65  | 0     |
| S12_extracted_k141_6624   | 1910  | NA | 0 | 0  | Not-determined | Genome-fragment | NA    | 0     |
| S12_extracted_k141_109045 | 1243  | NA | 0 | 1  | Not-determined | Genome-fragment | NA    | 0     |
| S7_vs_80101[full]         | 3897  | NA | 5 | 1  | Low-quality    | Genome-fragment | 3.99  | 33.33 |
| S12_extracted_k141_131897 | 1309  | NA | 0 | 0  | Not-determined | Genome-fragment | NA    | 0     |
| S16_extracted_30313       | 3897  | NA | 1 | 0  | Low-quality    | Genome-fragment | 7.5   | 0     |
| S12_extracted_k141_69136  | 32310 | NA | 8 | 0  | Medium-quality | Genome-fragment | 63.65 | 0     |
| S12_extracted_k141_6636   | 1062  | NA | 0 | 0  | Not-determined | Genome-fragment | NA    | 0     |
| S7_extracted_112582       | 3898  | NA | 3 | 0  | Low-quality    | Genome-fragment | 9.09  | 0     |
| S12_extracted_k141_171357 | 1195  | NA | 0 | 1  | Not-determined | Genome-fragment | NA    | 0     |
| S12_extracted_k141_13386  | 1227  | NA | 0 | 1  | Not-determined | Genome-fragment | NA    | 0     |
| S12_extracted_k141_101751 | 1398  | NA | 0 | 0  | Not-determined | Genome-fragment | NA    | 0     |
| S12_extracted_k141_76991  | 1123  | NA | 0 | 1  | Not-determined | Genome-fragment | NA    | 0     |
| S7_extracted_128697       | 3898  | NA | 3 | 0  | Low-quality    | Genome-fragment | 10.66 | 0     |
| S12_extracted_k141_123821 | 1689  | NA | 0 | 0  | Not-determined | Genome-fragment | NA    | 0     |
| S12_extracted_k141_85472  | 3898  | NA | 0 | 0  | Low-quality    | Genome-fragment | 10.2  | 0     |
| S12_extracted_k141_140600 | 1519  | NA | 0 | 0  | Not-determined | Genome-fragment | NA    | 0     |
| S12_extracted_k141_61551  | 1865  | NA | 0 | 0  | Not-determined | Genome-fragment | NA    | 0     |
| S12_extracted_k141_77020  | 1008  | NA | 0 | 0  | Not-determined | Genome-fragment | NA    | 0     |
| S12_extracted_k141_116072 | 1251  | NA | 0 | 0  | Not-determined | Genome-fragment | NA    | 0     |
| S12_extracted_k141_93337  | 1609  | NA | 0 | 0  | Not-determined | Genome-fragment | NA    | 0     |
| S12_extracted_k141_29881  | 1338  | NA | 0 | 0  | Not-determined | Genome-fragment | NA    | 0     |
| S12_extracted_k141_163652 | 3365  | NA | 0 | 1  | Not-determined | Genome-fragment | NA    | 0     |
| S12_extracted_k141_12423  | 1486  | NA | 0 | 2  | Not-determined | Genome-fragment | NA    | 0     |
| S12_extracted_k141_140609 | 16931 | NA | 0 | 0  | Not-determined | Genome-fragment | NA    | 0     |
| S12_extracted_k141_61542  | 1060  | NA | 0 | 0  | Not-determined | Genome-fragment | NA    | 0     |
| S12_extracted_k141_6708   | 1423  | NA | 0 | 1  | Not-determined | Genome-fragment | NA    | 0     |
| S12_extracted_k141_134818 | 1862  | NA | 0 | 0  | Not-determined | Genome-fragment | NA    | 0     |
| S12_extracted_k141_163674 | 4776  | NA | 0 | 3  | Not-determined | Genome-fragment | NA    | 0     |
| S12_extracted_k141_163678 | 1897  | NA | 0 | 2  | Not-determined | Genome-fragment | NA    | 0     |
| S12_extracted_k141_101718 | 5090  | NA | 0 | 2  | Not-determined | Genome-fragment | NA    | 0     |
| S12_extracted_k141_37270  | 3010  | NA | 0 | 2  | Not-determined | Genome-fragment | NA    | 0     |
| S12_extracted_k141_155553 | 1000  | NA | 0 | 0  | Not-determined | Genome-fragment | NA    | 0     |
| S12_extracted_k141_61582  | 4024  | NA | 0 | 3  | Not-determined | Genome-fragment | NA    | 0     |
| S12_extracted_k141_84728  | 1125  | NA | 0 | 0  | Not-determined | Genome-fragment | NA    | 0     |
| S12_extracted_k141_21724  | 2211  | NA | 0 | 1  | Not-determined | Genome-fragment | NA    | 0     |
| S12_extracted_k141_155571 | 1684  | NA | 0 | 2  | Not-determined | Genome-fragment | NA    | 0     |
| S12_extracted_k141_178929 | 3570  | NA | 0 | 0  | Not-determined | Genome-fragment | NA    | 0     |
| S12_extracted_k141_37272  | 1954  | NA | 0 | 1  | Not-determined | Genome-fragment | NA    | 0     |
| S12_extracted_k141_29946  | 1122  | NA | 0 | 0  | Not-determined | Genome-fragment | NA    | 0     |
| S12_extracted_k141_187914 | 56466 | NA | 1 | 2  | Medium-quality | Genome-fragment | 74.11 | 0     |
| S12_extracted_k141_69265  | 1570  | NA | 0 | 0  | Not-determined | Genome-fragment | NA    | 0     |
| S12_extracted_k141_187950 | 3155  | NA | 0 | 2  | Not-determined | Genome-fragment | NA    | 0     |
| S14_extracted_k141_107071 | 3901  | NA | 0 | 1  | Low-quality    | Genome-fragment | 5.1   | 0     |
| S12_extracted_k141_61616  | 3904  | NA | 0 | 0  | Not-determined | Genome-fragment | NA    | 0     |
| S12_extracted_k141_123926 | 1019  | NA | 0 | 0  | Not-determined | Genome-fragment | NA    | 0     |
| S16_vs_10753[full]        | 3901  | NA | 0 | 3  | Low-quality    | Genome-fragment | 2.61  | 0     |
| S12_extracted_k141_155617 | 1518  | NA | 0 | 0  | Not-determined | Genome-fragment | NA    | 0     |
| S12_extracted_k141_46510  | 5517  | NA | 0 | 3  | Not-determined | Genome-fragment | NA    | 0     |
| S12_extracted_k141_69302  | 4575  | NA | 0 | 1  | Not-determined | Genome-fragment | NA    | 0     |
| S12_extracted_k141_140717 | 1413  | NA | 0 | 0  | Not-determined | Genome-fragment | NA    | 0     |
| S1_vs_k141_130754[full]   | 3902  | NA | 1 | 0  | Low-quality    | Genome-fragment | 4.07  | 0     |
| S16_vs_26451[full]        | 3905  | NA | 0 | 0  | Low-quality    | Genome-fragment | 7.18  | 0     |
| S12_extracted_k141_53382  | 3903  | NA | 0 | 1  | Not-determined | Genome-fragment | NA    | 0     |
| S10_extracted_85384       | 3906  | NA | 4 | 0  | Low-quality    | Genome-fragment | 9.18  | 0     |
| S12_extracted_k141_30030  | 1242  | NA | 0 | 1  | Not-determined | Genome-fragment | NA    | 0     |
| S12_extracted_k141_132053 | 1244  | NA | 0 | 0  | Not-determined | Genome-fragment | NA    | 0     |
| S6_extracted_k141_22671   | 3906  | NA | 2 | 1  | Low-quality    | Genome-fragment | 1.58  | 0     |
| S8_extracted_k141_87789   | 3906  | NA | 0 | 1  | Low-quality    | Genome-fragment | 4.17  | 0     |
| S12_extracted_k141_101862 | 1057  | NA | 0 | 0  | Not-determined | Genome-fragment | NA    | 0     |
| S8_vs_k141_175488[full]   | 3906  | NA | 0 | 4  | Low-quality    | Genome-fragment | 2.93  | 0     |
| S17_extracted_k141_105369 | 3908  | NA | 0 | 1  | Low-quality    | Genome-fragment | 1.28  | 0     |
| S12_extracted_k141_163795 | 2792  | NA | 0 | 5  | Not-determined | Genome-fragment | NA    | 0     |
| S12_extracted_k141_69366  | 1077  | NA | 0 | 1  | Not-determined | Genome-fragment | NA    | 0     |
| S12_extracted_k141_179029 | 1302  | NA | 0 | 1  | Not-determined | Genome-fragment | NA    | 0     |
| S12_extracted_k141_30108  | 1143  | NA | 0 | 1  | Not-determined | Genome-fragment | NA    | 0     |
| S12_extracted_k141_132104 | 1395  | NA | 0 | 0  | Not-determined | Genome-fragment | NA    | 0     |
| S3_vs_k141_68826[full]    | 3909  | NA | 0 | 0  | Low-quality    | Genome-fragment | 2.49  | 0     |
| S5_vs_k141_15288[InZneme] | 3909  | NA | 1 | 0  | Low-quality    | Genome-fragment | 10.28 | 0     |
| S12_extracted_k141_77223  | 3175  | NA | 0 | 1  | Not-determined | Genome-fragment | NA    | 0     |
| S12_extracted_k141_21856  | 1287  | NA | 0 | 1  | Not-determined | Genome-fragment | NA    | 0     |
| S12_extracted_k141_21857  | 1429  | NA | 0 | 1  | Not-determined | Genome-fragment | NA    | 0     |
| S12_extracted_k141_13635  | 2506  | NA | 0 | 2  | Not-determined | Genome-fragment | NA    | 0     |
| S16_extracted_52692       | 3909  | NA | 0 | 0  | Low-quality    | Genome-fragment | 10.77 | 0     |
| S12_extracted_k141_116266 | 1450  | NA | 0 | 0  | Not-determined | Genome-fragment | NA    | 0     |
| S10_extracted_85569       | 3909  | NA | 5 | 0  | Low-quality    | Genome-fragment | 7.44  | 0     |
| S12_extracted_k141_69415  | 1340  | NA | 0 | 2  | Not-determined | Genome-fragment | NA    | 0     |
| S12_extracted_k141_66644  | 1329  | NA | 0 | 0  | Not-determined | Genome-fragment | NA    | 0     |
| S12_extracted_k141_6874   | 1285  | NA | 0 | 0  | Not-determined | Genome-fragment | NA    | 0     |
| S12_extracted_k141_140817 | 3127  | NA | 0 |    |                |                 |       |       |



|                           |      |    |    |      |   |                |                 |    |       |
|---------------------------|------|----|----|------|---|----------------|-----------------|----|-------|
| S12_extracted_k141_69581  | 1140 | No | NA | 0    | 1 | Not-determined | Genome-fragment | NA | 0     |
| S12_extracted_k141_13724  | 1179 | No | NA | 0    | 0 | Not-determined | Genome-fragment | NA | 0     |
| S12_extracted_k141_140910 | 3522 | No | NA | 0    | 0 | Not-determined | Genome-fragment | NA | 0     |
| S12_extracted_k141_61774  | 1098 | No | NA | 0    | 0 | Not-determined | Genome-fragment | NA | 0     |
| S13_extracted_131614      | 3913 | No | NA | 0    | 1 | Low-quality    | Genome-fragment | NA | 2.01  |
| S12_extracted_k141_171586 | 1181 | No | NA | 0    | 0 | Not-determined | Genome-fragment | NA | 0     |
| S12_extracted_k141_188092 | 2206 | No | NA | 0    | 1 | Not-determined | Genome-fragment | NA | 0     |
| S12_extracted_k141_21998  | 2259 | No | NA | 0    | 0 | Not-determined | Genome-fragment | NA | 0     |
| S12_extracted_k141_61378  | 1693 | No | NA | 0    | 1 | Not-determined | Genome-fragment | NA | 0     |
| S12_extracted_k141_140937 | 4942 | No | NA | 0    | 8 | Not-determined | Genome-fragment | NA | 0     |
| S12_extracted_k141_85067  | 2521 | No | NA | 0    | 0 | Not-determined | Genome-fragment | NA | 0     |
| S12_extracted_k141_20362  | 1338 | No | NA | 0    | 0 | Not-determined | Genome-fragment | NA | 0     |
| S12_extracted_k141_53675  | 1074 | No | NA | 0    | 1 | Not-determined | Genome-fragment | NA | 0     |
| S12_extracted_k141_171622 | 1074 | No | NA | 0    | 0 | Not-determined | Genome-fragment | NA | 0     |
| S12_extracted_k141_85081  | 3125 | No | NA | 0    | 1 | Not-determined | Genome-fragment | NA | 0     |
| S12_extracted_k141_53688  | 1313 | No | NA | 0    | 1 | Not-determined | Genome-fragment | NA | 0     |
| S12_extracted_k141_77393  | 1014 | No | NA | 0    | 1 | Not-determined | Genome-fragment | NA | 0     |
| S17_vs_k141_55841[full]   | 3914 | No | NA | 0    | 0 | Low-quality    | Genome-fragment | NA | 6.4   |
| S12_extracted_k141_10310  | 1073 | No | NA | 0    | 1 | Not-determined | Genome-fragment | NA | 0     |
| S12_extracted_k141_93707  | 1241 | No | NA | 0    | 1 | Not-determined | Genome-fragment | NA | 0     |
| S11_extracted_k141_71779  | 3914 | No | NA | 0    | 0 | Low-quality    | Genome-fragment | NA | 9.11  |
| S14_extracted_k141_20057  | 3914 | No | NA | 3    | 0 | Low-quality    | Genome-fragment | NA | 6.54  |
| S12_extracted_k141_53713  | 1002 | No | NA | 0    | 0 | Not-determined | Genome-fragment | NA | 0     |
| S12_extracted_k141_30325  | 1646 | No | NA | 0    | 2 | Not-determined | Genome-fragment | NA | 0     |
| S12_vs_k141_147927[full]  | 3916 | No | NA | 0    | 2 | Low-quality    | Genome-fragment | NA | 1.77  |
| S12_extracted_k141_102089 | 3405 | No | NA | 0    | 0 | Not-determined | Genome-fragment | NA | 0     |
| S12_extracted_k141_22063  | 2052 | No | NA | 0    | 2 | Not-determined | Genome-fragment | NA | 0     |
| S12_extracted_k141_124203 | 1017 | No | NA | 0    | 1 | Not-determined | Genome-fragment | NA | 0     |
| S12_extracted_k141_109549 | 1122 | No | NA | 0    | 2 | Not-determined | Genome-fragment | NA | 0     |
| S12_extracted_k141_179181 | 3521 | No | NA | 0    | 3 | Not-determined | Genome-fragment | NA | 0     |
| S5_vs_k141_79879[full]    | 3918 | No | NA | 0    | 2 | Low-quality    | Genome-fragment | NA | 7.91  |
| S12_extracted_k141_53721  | 1471 | No | NA | 0    | 1 | Not-determined | Genome-fragment | NA | 0     |
| S12_extracted_k141_13818  | 1394 | No | NA | 0    | 1 | Not-determined | Genome-fragment | NA | 0     |
| S12_extracted_k141_46810  | 1487 | No | NA | 0    | 0 | Not-determined | Genome-fragment | NA | 0     |
| S12_extracted_k141_53743  | 1268 | No | NA | 0    | 1 | Not-determined | Genome-fragment | NA | 0     |
| S12_extracted_k141_155906 | 4344 | No | NA | 0    | 2 | Not-determined | Genome-fragment | NA | 0     |
| S16_extracted_64686       | 3918 | No | NA | 0    | 0 | Low-quality    | Genome-fragment | NA | 6.71  |
| S16_vs_64293[full]        | 3918 | No | NA | 1    | 0 | Low-quality    | Genome-fragment | NA | 7.41  |
| S4_vs_VHSorice_10386-ca_1 | 3918 | No | NA | 0    | 0 | Low-quality    | Genome-fragment | NA | 5.76  |
| S12_extracted_k141_141019 | 1084 | No | NA | 0    | 1 | Not-determined | Genome-fragment | NA | 0     |
| S12_extracted_k141_148504 | 1026 | No | NA | 0    | 1 | Not-determined | Genome-fragment | NA | 0     |
| S14_vs_k141_257121[full]  | 3920 | No | NA | 0    | 0 | Low-quality    | Genome-fragment | NA | 4.28  |
| S7_extracted_68737        | 3920 | No | NA | 1    | 0 | Low-quality    | Genome-fragment | NA | 2.88  |
| S7_vs_116070[full]        | 3920 | No | NA | 1    | 0 | Low-quality    | Genome-fragment | NA | 9.83  |
| S12_extracted_k141_188179 | 7621 | No | NA | 0    | 0 | Not-determined | Genome-fragment | NA | 0     |
| S12_extracted_k141_188180 | 1822 | No | NA | 0    | 1 | Not-determined | Genome-fragment | NA | 0     |
| S12_extracted_k141_188186 | 1058 | No | NA | 0    | 2 | Not-determined | Genome-fragment | NA | 0     |
| S12_extracted_k141_85167  | 1686 | No | NA | 0    | 0 | Not-determined | Genome-fragment | NA | 0     |
| S12_extracted_k141_164025 | 1270 | No | NA | 0    | 2 | Not-determined | Genome-fragment | NA | 0     |
| S16_extracted_39053       | 3920 | No | NA | 0    | 0 | Low-quality    | Genome-fragment | NA | 8.3   |
| S12_extracted_k141_102142 | 1242 | No | NA | 0    | 0 | Not-determined | Genome-fragment | NA | 0     |
| S12_vs_k141_124164[full]  | 3921 | No | NA | 0    | 0 | Low-quality    | Genome-fragment | NA | 7.52  |
| S12_extracted_k141_124244 | 1557 | No | NA | 1    | 1 | Not-determined | Genome-fragment | NA | 0     |
| S12_extracted_k141_53793  | 1178 | No | NA | 0    | 1 | Not-determined | Genome-fragment | NA | 0     |
| S12_extracted_k141_53937  | 1395 | No | NA | 0    | 1 | Not-determined | Genome-fragment | NA | 0     |
| S12_extracted_k141_109606 | 1034 | No | NA | 0    | 1 | Not-determined | Genome-fragment | NA | 0     |
| S12_extracted_k141_109608 | 1669 | No | NA | 0    | 0 | Not-determined | Genome-fragment | NA | 0     |
| S12_extracted_k141_124245 | 1386 | No | NA | 0    | 1 | Not-determined | Genome-fragment | NA | 0     |
| S12_extracted_k141_188125 | 2652 | No | NA | 0    | 1 | Not-determined | Genome-fragment | NA | 0     |
| S12_extracted_k141_93831  | 1247 | No | NA | 0    | 1 | Not-determined | Genome-fragment | NA | 0     |
| S12_extracted_k141_93839  | 1455 | No | NA | 0    | 0 | Not-determined | Genome-fragment | NA | 0     |
| S12_extracted_k141_124280 | 1054 | No | NA | 0    | 0 | Not-determined | Genome-fragment | NA | 0     |
| S12_extracted_k141_141088 | 1539 | No | NA | 0    | 1 | Not-determined | Genome-fragment | NA | 0     |
| S12_extracted_k141_179266 | 1048 | No | NA | 0    | 0 | Not-determined | Genome-fragment | NA | 0     |
| S12_extracted_k141_141089 | 3259 | No | NA | 0    | 1 | Not-determined | Genome-fragment | NA | 0     |
| S12_extracted_k141_179269 | 3354 | No | NA | 0    | 0 | Not-determined | Genome-fragment | NA | 0     |
| S12_extracted_k141_69798  | 6044 | No | NA | 0    | 4 | Not-determined | Genome-fragment | NA | 0     |
| S12_vs_k141_46736[full]   | 3922 | No | NA | 0    | 0 | Low-quality    | Genome-fragment | NA | 4.61  |
| S12_extracted_k141_132470 | 1029 | No | NA | 0    | 0 | Not-determined | Genome-fragment | NA | 0     |
| S11_vs_k141_68606[full]   | 3923 | No | NA | 0    | 3 | Low-quality    | Genome-fragment | NA | 3.21  |
| S12_extracted_k141_69807  | 3317 | No | NA | 0    | 2 | Not-determined | Genome-fragment | NA | 0     |
| S12_extracted_k141_155958 | 2318 | No | NA | 0    | 0 | Not-determined | Genome-fragment | NA | 0     |
| S9_vs_k141_10071[full]    | 3924 | No | NA | 1    | 0 | Low-quality    | Genome-fragment | NA | 8.71  |
| S12_extracted_k141_46896  | 1222 | No | NA | 0    | 2 | Not-determined | Genome-fragment | NA | 0     |
| S3_vs_k141_25632[full]    | 3924 | No | NA | 0    | 0 | Low-quality    | Genome-fragment | NA | 4.5   |
| S12_extracted_k141_188256 | 1956 | No | NA | 0    | 1 | Not-determined | Genome-fragment | NA | 0     |
| S11_vs_k141_85120[full]   | 3925 | No | NA | 1    | 0 | Low-quality    | Genome-fragment | NA | 6.41  |
| S12_extracted_k141_69829  | 1147 | No | NA | 0    | 1 | Not-determined | Genome-fragment | NA | 0     |
| S12_extracted_k141_46917  | 1006 | No | NA | 0    | 0 | Not-determined | Genome-fragment | NA | 0     |
| S12_extracted_k141_30488  | 3126 | No | NA | 0    | 1 | Not-determined | Genome-fragment | NA | 0     |
| S14_extracted_k141_38216  | 3926 | No | NA | 3    | 0 | Low-quality    | Genome-fragment | NA | 9.74  |
| S12_extracted_k141_102206 | 1895 | No | NA | 0    | 2 | Not-determined | Genome-fragment | NA | 0     |
| S7_extracted_46630        | 3926 | No | NA | 3068 | 1 | Low-quality    | Genome-fragment | NA | 7.88  |
| S16_extracted_152773      | 3927 | No | NA | 0    | 0 | Low-quality    | Genome-fragment | NA | 12.2  |
| S12_extracted_k141_62045  | 1438 | No | NA | 0    | 2 | Not-determined | Genome-fragment | NA | 0     |
| S12_extracted_k141_46947  | 1740 | No | NA | 0    | 1 | Not-determined | Genome-fragment | NA | 0     |
| S12_extracted_k141_22289  | 1042 | No | NA | 0    | 1 | Not-determined | Genome-fragment | NA | 0     |
| S12_extracted_k141_241166 | 7796 | No | NA | 0    | 3 | Not-determined | Genome-fragment | NA | 0     |
| S12_extracted_k141_171831 | 4684 | No | NA | 0    | 0 | Not-determined | Genome-fragment | NA | 0     |
| S12_extracted_k141_85305  | 1506 | No | NA | 0    | 1 | Not-determined | Genome-fragment | NA | 0     |
| S12_extracted_k141_62086  | 2001 | No | NA | 0    | 2 | Not-determined | Genome-fragment | NA | 0     |
| S12_extracted_k141_69895  | 2156 | No | NA | 0    | 0 | Not-determined | Genome-fragment | NA | 0     |
| S12_extracted_k141_116604 | 1131 | No | NA | 0    | 1 | Not-determined | Genome-fragment | NA | 0     |
| S12_extracted_k141_108128 | 3927 | No | NA | 6    | 0 | Low-quality    | Genome-fragment | NA | 8.93  |
| S12_extracted_k141_164025 | 2993 | No | NA | 0    | 0 | Not-determined | Genome-fragment | NA | 0     |
| S11_extracted_k141_38164  | 3929 | No | NA | 853  | 1 | Low-quality    | Genome-fragment | NA | 1.99  |
| S12_extracted_k141_171850 | 1012 | No | NA | 0    | 1 | Not-determined | Genome-fragment | NA | 0     |
| S12_extracted_k141_188384 | 1370 | No | NA | 0    | 1 | Not-determined | Genome-fragment | NA | 0     |
| S12_extracted_k141_164231 | 1233 | No | NA | 0    | 0 | Not-determined | Genome-fragment | NA | 0     |
| S3_extracted_k141_87626   | 3929 | No | NA | 0    | 1 | Low-quality    | Genome-fragment | NA | 1.67  |
| S16_vs_85480[full]        | 3929 | No | NA | 1899 | 1 | Low-quality    | Genome-fragment | NA | 3.91  |
| S12_extracted_k141_23241  | 1182 | No | NA | 0    | 0 | Not-determined | Genome-fragment | NA | 0     |
| S8_vs_k141_63897[full]    | 3929 | No | NA | 0    | 1 | Low-quality    | Genome-fragment | NA | 7.06  |
| S13_vs_98172[full]        | 3930 | No | NA | 1    | 0 | Low-quality    | Genome-fragment | NA | 9.6   |
| S12_extracted_k141_101702 | 3931 | No | NA | 0    | 0 | Low-quality    | Genome-fragment | NA | 9.81  |
| S12_extracted_k141_30555  | 4868 | No | NA | 0    | 1 | Not-determined | Genome-fragment | NA | 0     |
| S5_vs_k141_74706[full]    | 3931 | No | NA | 4    | 0 | Low-quality    | Genome-fragment | NA | 6.96  |
| S12_extracted_k141_188407 | 1038 | No | NA | 0    | 0 | Not-determined | Genome-fragment | NA | 0     |
| S12_extracted_k141_188420 | 1278 | No | NA | 0    | 0 | Not-determined | Genome-fragment | NA | 0     |
| S12_extracted_k141_37796  | 1487 | No | NA | 0    | 2 | Not-determined | Genome-fragment | NA | 0     |
| S12_extracted_k141_17650  | 1658 | No | NA | 0    | 0 | Not-determined | Genome-fragment | NA | 0     |
| S12_extracted_k141_93953  | 1731 | No | NA | 0    | 0 | Not-determined | Genome-fragment | NA | 0     |
| S12_extracted_k141_70746  | 3931 | No | NA | 2    | 0 | Low-quality    | Genome-fragment | NA | 3.59  |
| S12_extracted_k141_22418  | 1535 | No | NA | 0    | 2 | Not-determined | Genome-fragment | NA | 0     |
| S15_extracted_59262       | 3931 | No | NA | 0    | 0 | Low-quality    | Genome-fragment | NA | 8.8   |
| S12_extracted_k141_93968  | 3004 | No | NA | 0    | 3 | Not-determined | Genome-fragment | NA | 0     |
| S12_extracted_k141_62210  | 1291 | No | NA | 0    | 2 | Not-determined | Genome-fragment | NA | 0     |
| S12_extracted_k141_224657 | 1524 | No | NA | 0    | 1 | Not-determined | Genome-fragment | NA | 0     |
| S12_extracted_k141_132081 | 1052 | No | NA | 0    | 0 | Not-determined | Genome-fragment | NA | 0     |
| S12_extracted_k141_179457 | 1921 | No | NA | 0    | 0 | Not-determined | Genome-fragment | NA | 0     |
| S8_vs_k141_23458[full]    | 3931 | No | NA | 2176 | 2 | Low-quality    | Genome-fragment | NA | 4.64  |
| S12_extracted_k141_14079  | 2772 | No | NA | 0    | 0 | Not-determined | Genome-fragment | NA | 0     |
| S8_vs_k141_247694[full]   | 3932 | No | NA | 0    | 1 | Low-quality    | Genome-fragment | NA | 9.28  |
| S12_extracted_k141_188483 | 1184 | No | NA | 0    | 2 | Not-determined | Genome-fragment | NA | 0     |
| S1_vs_k141_97621[full]    | 3932 | No | NA | 0    | 0 | Low-quality    | Genome-fragment | NA | 10.34 |
| S12_extracted_k141_7403   | 1377 | No | NA | 0    | 0 | Not-determined | Genome-fragment | NA | 0     |
| S12_extracted_k141_148877 | 1303 | No | NA | 0    | 0 | Not-determined | Genome-fragment | NA | 0     |
| S12_extracted_k141_109786 | 1973 | No | NA | 0    | 1 | Not-determined | Genome-fragment | NA | 0     |
| S12_extracted_k141_124530 | 1457 | No | NA | 0    | 1 | Not-determined | Genome-fragment | NA | 0     |
| S12_extracted_k141_132703 | 1440 | No | NA | 0    | 1 | Not-determined | Genome-fragment | NA | 0     |
| S5_vs_k141_79110[full]    | 3933 | No | NA | 3    | 0 | Low-quality    | Genome-fragment | NA | 6.27  |
| S12_extracted_k141_124546 | 1293 | No | NA | 0    | 1 | Not-determined | Genome-fragment | NA | 0     |
| S12_extracted_k141_109820 | 1052 | No | NA | 0    | 0 | Not-determined | Genome-fragment | NA | 0     |
| S12_extracted_k141_62297  | 2681 | No | NA | 0    | 1 | Not-determined | Genome-fragment | NA | 0     |
| S12_extracted_k141_141343 | 1736 | No | NA | 0    | 1 | Not-determined | Genome-fragment | NA | 0     |
| S8_vs_k141_19778[full]    | 3933 | No | NA | 0    | 3 | Low-quality    | Genome-fragment | NA | 2.38  |
| S1_vs_k141_132221[full]   | 3934 | No | NA | 3    | 0 | Low-quality    | Genome-fragment | NA | 8.11  |
| S12_extracted_k141_62308  | 2184 | No | NA | 0    | 1 | Not-determined | Genome-fragment | NA | 0     |
| S12_extracted_k141_70088  | 3315 | No | NA | 0    | 2 | Not-determined | Genome-fragment | NA | 0     |
| S12_extracted_k141_132730 | 4707 | No | NA | 0    | 4 | Not-determined | Genome-fragment | NA | 0     |
| S12_extracted_k141_7461   | 1001 | No | NA | 0    | 0 | Not-determined | Genome-fragment | NA | 0     |
| S12_extracted_k141_148941 | 1098 | No | NA | 0    | 0 | Not-determined | Genome-fragment | NA | 0     |
| S12_extracted_k141_148957 | 3292 | No | NA | 0    | 2 | Not-determined | Genome-fragment | NA | 0     |
| S12_extracted_k141_70128  | 1121 | No | NA | 0    | 0 | Not-determined | Genome-fragment | NA | 0     |
| S12                       |      |    |    |      |   |                |                 |    |       |



|                           |       |    |    |   |             |                 |                 |      |       |
|---------------------------|-------|----|----|---|-------------|-----------------|-----------------|------|-------|
| S12_extracted_k141_179716 | 1290  | No | NA | 0 | 0           | Not-determined  | Genome-fragment | NA   | 0     |
| S12_extracted_k141_15564  | 4166  | No | NA | 0 | 1           | Not-determined  | Genome-fragment | NA   | 0     |
| S12_extracted_k141_7563   | 1245  | No | NA | 0 | 1           | Not-determined  | Genome-fragment | NA   | 0     |
| S12_extracted_k141_62479  | 4227  | No | NA | 0 | 3           | Not-determined  | Genome-fragment | NA   | 0     |
| S12_extracted_k141_12560  | 2477  | No | NA | 0 | 2           | Not-determined  | Genome-fragment | NA   | 0     |
| S12_extracted_k141_110025 | 1317  | No | NA | 0 | 0           | Not-determined  | Genome-fragment | NA   | 0     |
| S12_extracted_k141_62496  | 3273  | No | NA | 0 | 0           | Not-determined  | Genome-fragment | NA   | 0     |
| S11_extracted_k141_45112  | 3935  | No | NA | 2 | 1           | Low-quality     | Genome-fragment | NA   | 6.71  |
| S12_extracted_k141_14371  | 1211  | No | NA | 0 | 1           | Not-determined  | Genome-fragment | NA   | 0     |
| S12_extracted_k141_22594  | 1317  | No | NA | 0 | 0           | Not-determined  | Genome-fragment | NA   | 0     |
| S5_extracted_k141_120460  | 3935  | No | NA | 0 | 2           | Low-quality     | Genome-fragment | NA   | 0.45  |
| S12_extracted_k141_22607  | 1103  | No | NA | 0 | 0           | Not-determined  | Genome-fragment | NA   | 0     |
| S12_extracted_k141_7632   | 1275  | No | NA | 0 | 0           | Not-determined  | Genome-fragment | NA   | 0     |
| S12_extracted_k141_85728  | 4035  | No | NA | 0 | 1           | Not-determined  | Genome-fragment | NA   | 0     |
| S16_vs_123769[full]       | 3935  | No | NA | 1 | 0           | Low-quality     | Genome-fragment | NA   | 6.14  |
| S12_extracted_k141_85734  | 1210  | No | NA | 0 | 0           | Not-determined  | Genome-fragment | NA   | 0     |
| S12_extracted_k141_62535  | 1003  | No | NA | 0 | 1           | Not-determined  | Genome-fragment | NA   | 0     |
| S12_extracted_k141_110059 | 1067  | No | NA | 0 | 0           | Not-determined  | Genome-fragment | NA   | 0     |
| S12_extracted_k141_149171 | 1273  | No | NA | 0 | 1           | Not-determined  | Genome-fragment | NA   | 0     |
| S12_extracted_k141_62540  | 1339  | No | NA | 0 | 0           | Not-determined  | Genome-fragment | NA   | 0     |
| S1_extracted_k141_126806  | 3936  | No | NA | 0 | 1           | Low-quality     | Genome-fragment | NA   | 4.9   |
| S12_extracted_k141_143402 | 3734  | No | NA | 0 | 1           | Not-determined  | Genome-fragment | NA   | 0     |
| S12_extracted_k141_141520 | 2228  | No | NA | 0 | 1           | Not-determined  | Genome-fragment | NA   | 0     |
| S12_extracted_k141_164564 | 1440  | No | NA | 0 | 1           | Not-determined  | Genome-fragment | NA   | 0     |
| S12_extracted_k141_85756  | 1285  | No | NA | 0 | 1           | Not-determined  | Genome-fragment | NA   | 0     |
| S12_extracted_k141_178628 | 1671  | No | NA | 0 | 1           | Not-determined  | Genome-fragment | NA   | 0     |
| S12_extracted_k141_94099  | 5733  | No | NA | 0 | 1           | Not-determined  | Genome-fragment | NA   | 0     |
| S16_extracted_25558       | 3936  | No | NA | 3 | 0           | Low-quality     | Genome-fragment | NA   | 11.38 |
| S16_vs_14288[full]        | 3936  | No | NA | 1 | Low-quality | Genome-fragment | NA              | 7.65 | 0     |
| S12_extracted_k141_94113  | 1312  | No | NA | 0 | 1           | Not-determined  | Genome-fragment | NA   | 0     |
| S12_extracted_k141_94115  | 1204  | No | NA | 0 | 2           | Not-determined  | Genome-fragment | NA   | 0     |
| S12_extracted_k141_156108 | 1525  | No | NA | 0 | 1           | Not-determined  | Genome-fragment | NA   | 0     |
| S12_extracted_k141_110111 | 1787  | No | NA | 0 | 2           | Not-determined  | Genome-fragment | NA   | 0     |
| S12_extracted_k141_62573  | 2867  | No | NA | 0 | 1           | Not-determined  | Genome-fragment | NA   | 0     |
| S12_extracted_k141_149214 | 4413  | No | NA | 0 | 2           | Not-determined  | Genome-fragment | NA   | 0     |
| S11_extracted_k141_14541  | 3917  | No | NA | 0 | 1           | Low-quality     | Genome-fragment | NA   | 7.01  |
| S12_extracted_k141_70913  | 3917  | No | NA | 0 | 2           | Low-quality     | Genome-fragment | NA   | 0.78  |
| S12_extracted_k141_149221 | 1861  | No | NA | 0 | 1           | Not-determined  | Genome-fragment | NA   | 0     |
| S12_extracted_k141_70384  | 1159  | No | NA | 0 | 1           | Not-determined  | Genome-fragment | NA   | 0     |
| S12_extracted_k141_116968 | 1598  | No | NA | 0 | 0           | Not-determined  | Genome-fragment | NA   | 0     |
| S12_extracted_k141_116975 | 1914  | No | NA | 0 | 1           | Not-determined  | Genome-fragment | NA   | 0     |
| S12_extracted_k141_149215 | 1404  | No | NA | 0 | 0           | Not-determined  | Genome-fragment | NA   | 0     |
| S12_extracted_k141_116978 | 1681  | No | NA | 0 | 1           | Not-determined  | Genome-fragment | NA   | 0     |
| S12_extracted_k141_22725  | 1011  | No | NA | 0 | 0           | Not-determined  | Genome-fragment | NA   | 0     |
| S16_extracted_22200       | 3918  | No | NA | 0 | 1           | Low-quality     | Genome-fragment | NA   | 5.92  |
| S12_extracted_k141_7712   | 1717  | No | NA | 0 | 0           | Not-determined  | Genome-fragment | NA   | 0     |
| S12_extracted_k141_171953 | 1014  | No | NA | 0 | 0           | Not-determined  | Genome-fragment | NA   | 0     |
| S12_extracted_k141_7716   | 1588  | No | NA | 0 | 0           | Not-determined  | Genome-fragment | NA   | 0     |
| S16_extracted_101221      | 3918  | No | NA | 0 | 0           | Low-quality     | Genome-fragment | NA   | 8.62  |
| S7_extracted_38115        | 3941  | No | NA | 0 | 3           | Low-quality     | Genome-fragment | NA   | 1.68  |
| S12_extracted_k141_22785  | 1192  | No | NA | 0 | 1           | Not-determined  | Genome-fragment | NA   | 0     |
| S12_extracted_k141_38125  | 1546  | No | NA | 0 | 0           | Not-determined  | Genome-fragment | NA   | 0     |
| S12_extracted_k141_22786  | 1242  | No | NA | 0 | 0           | Not-determined  | Genome-fragment | NA   | 0     |
| S12_extracted_k141_179914 | 1151  | No | NA | 0 | 0           | Not-determined  | Genome-fragment | NA   | 0     |
| S12_extracted_k141_70462  | 2372  | No | NA | 0 | 1           | Not-determined  | Genome-fragment | NA   | 0     |
| S12_extracted_k141_124777 | 5217  | No | NA | 0 | 0           | Not-determined  | Genome-fragment | NA   | 0     |
| S12_extracted_k141_38155  | 4622  | No | NA | 0 | 2           | Not-determined  | Genome-fragment | NA   | 0     |
| S12_extracted_k141_179936 | 1271  | No | NA | 0 | 1           | Not-determined  | Genome-fragment | NA   | 0     |
| S12_extracted_k141_117024 | 2245  | No | NA | 0 | 2           | Not-determined  | Genome-fragment | NA   | 0     |
| S12_extracted_k141_94153  | 1296  | No | NA | 0 | 1           | Not-determined  | Genome-fragment | NA   | 0     |
| S16_extracted_42100       | 3942  | No | NA | 0 | 2           | Low-quality     | Genome-fragment | NA   | 1.92  |
| S12_extracted_k141_62560  | 1064  | No | NA | 0 | 1           | Not-determined  | Genome-fragment | NA   | 0     |
| S12_extracted_k141_38162  | 1259  | No | NA | 0 | 1           | Not-determined  | Genome-fragment | NA   | 0     |
| S12_extracted_k141_171999 | 1039  | No | NA | 0 | 0           | Not-determined  | Genome-fragment | NA   | 0     |
| S12_extracted_k141_141616 | 1495  | No | NA | 0 | 1           | Not-determined  | Genome-fragment | NA   | 0     |
| S12_extracted_k141_14527  | 5924  | No | NA | 0 | 0           | Not-determined  | Genome-fragment | NA   | 0     |
| S12_extracted_k141_14529  | 1941  | No | NA | 0 | 0           | Not-determined  | Genome-fragment | NA   | 0     |
| S12_extracted_k141_156148 | 2069  | No | NA | 0 | 0           | Not-determined  | Genome-fragment | NA   | 0     |
| S12_extracted_k141_7815   | 1808  | No | NA | 0 | 0           | Not-determined  | Genome-fragment | NA   | 0     |
| S12_extracted_k141_171027 | 1197  | No | NA | 0 | 1           | Not-determined  | Genome-fragment | NA   | 0     |
| S12_extracted_k141_156159 | 1048  | No | NA | 0 | 1           | Not-determined  | Genome-fragment | NA   | 0     |
| S12_extracted_k141_85843  | 1511  | No | NA | 0 | 2           | Not-determined  | Genome-fragment | NA   | 0     |
| S12_extracted_k141_31005  | 1949  | No | NA | 0 | 4           | Not-determined  | Genome-fragment | NA   | 0     |
| S12_extracted_k141_172055 | 1002  | No | NA | 0 | 1           | Not-determined  | Genome-fragment | NA   | 0     |
| S12_extracted_k141_7819   | 3017  | No | NA | 0 | 1           | Not-determined  | Genome-fragment | NA   | 0     |
| S12_extracted_k141_124841 | 1159  | No | NA | 0 | 0           | Not-determined  | Genome-fragment | NA   | 0     |
| S12_extracted_k141_7794   | 1014  | No | NA | 0 | 2           | Not-determined  | Genome-fragment | NA   | 0     |
| S12_extracted_k141_164666 | 6240  | No | NA | 0 | 2           | Not-determined  | Genome-fragment | NA   | 0     |
| S12_extracted_k141_172072 | 2475  | No | NA | 0 | 2           | Not-determined  | Genome-fragment | NA   | 0     |
| S12_extracted_k141_62720  | 8243  | No | NA | 0 | 5           | Not-determined  | Genome-fragment | NA   | 0     |
| S16_vs_156089[full]       | 3942  | No | NA | 2 | 0           | Low-quality     | Genome-fragment | NA   | 7.32  |
| S13_extracted_124879      | 2943  | No | NA | 1 | 1           | Low-quality     | Genome-fragment | NA   | 5.61  |
| S12_extracted_k141_180007 | 1068  | No | NA | 0 | 1           | Not-determined  | Genome-fragment | NA   | 0     |
| S16_vs_169500[full]       | 3943  | No | NA | 0 | 0           | Low-quality     | Genome-fragment | NA   | 10.37 |
| S12_extracted_k141_62738  | 1077  | No | NA | 0 | 0           | Not-determined  | Genome-fragment | NA   | 0     |
| S9_vs_k141_29746[full]    | 3944  | No | NA | 0 | 0           | Low-quality     | Genome-fragment | NA   | 8.93  |
| S12_extracted_k141_156218 | 4604  | No | NA | 0 | 1           | Not-determined  | Genome-fragment | NA   | 0     |
| S16_vs_58739[full]        | 3944  | No | NA | 5 | 0           | Low-quality     | Genome-fragment | NA   | 2.4   |
| S12_extracted_k141_12856  | 1362  | No | NA | 0 | 0           | Not-determined  | Genome-fragment | NA   | 0     |
| S12_extracted_k141_124894 | 1448  | No | NA | 0 | 0           | Not-determined  | Genome-fragment | NA   | 0     |
| S12_extracted_k141_180021 | 1328  | No | NA | 0 | 0           | Not-determined  | Genome-fragment | NA   | 0     |
| S13_extracted_29510       | 3945  | No | NA | 0 | 1           | Low-quality     | Genome-fragment | NA   | 3.84  |
| S12_extracted_k141_117104 | 2267  | No | NA | 0 | 1           | Not-determined  | Genome-fragment | NA   | 0     |
| S11_vs_k141_101308[full]  | 3947  | No | NA | 1 | 0           | Low-quality     | Genome-fragment | NA   | 7.36  |
| S12_extracted_k141_31025  | 1626  | No | NA | 0 | 1           | Not-determined  | Genome-fragment | NA   | 0     |
| S12_extracted_k141_149396 | 10108 | No | NA | 0 | 5           | Not-determined  | Genome-fragment | NA   | 0     |
| S1_vs_k141_30800[full]    | 3947  | No | NA | 1 | 0           | Low-quality     | Genome-fragment | NA   | 8.97  |
| S12_extracted_k141_164743 | 1656  | No | NA | 0 | 3           | Not-determined  | Genome-fragment | NA   | 0     |
| S12_extracted_k141_117134 | 1415  | No | NA | 0 | 0           | Not-determined  | Genome-fragment | NA   | 0     |
| S12_extracted_k141_85934  | 1477  | No | NA | 0 | 1           | Not-determined  | Genome-fragment | NA   | 0     |
| S12_extracted_k141_38264  | 1042  | No | NA | 0 | 0           | Not-determined  | Genome-fragment | NA   | 0     |
| S12_extracted_k141_14665  | 1507  | No | NA | 0 | 1           | Not-determined  | Genome-fragment | NA   | 0     |
| S12_extracted_k141_188745 | 4611  | No | NA | 0 | 2           | Not-determined  | Genome-fragment | NA   | 0     |
| S12_extracted_k141_164762 | 1262  | No | NA | 0 | 1           | Not-determined  | Genome-fragment | NA   | 0     |
| S3_vs_k141_92724[full]    | 3947  | No | NA | 0 | 0           | Low-quality     | Genome-fragment | NA   | 7.99  |
| S12_extracted_k141_164782 | 1241  | No | NA | 0 | 1           | Not-determined  | Genome-fragment | NA   | 0     |
| S12_extracted_k141_78289  | 1021  | No | NA | 0 | 1           | Not-determined  | Genome-fragment | NA   | 0     |
| S5_extracted_k141_63703   | 3947  | No | NA | 0 | 1           | Low-quality     | Genome-fragment | NA   | 1.65  |
| S12_extracted_k141_85991  | 1489  | No | NA | 0 | 1           | Not-determined  | Genome-fragment | NA   | 0     |
| S12_extracted_k141_156296 | 1361  | No | NA | 0 | 1           | Not-determined  | Genome-fragment | NA   | 0     |
| S12_extracted_k141_145462 | 2783  | No | NA | 0 | 1           | Not-determined  | Genome-fragment | NA   | 0     |
| S12_extracted_k141_148438 | 1058  | No | NA | 0 | 0           | Not-determined  | Genome-fragment | NA   | 0     |
| S12_extracted_k141_156311 | 1009  | No | NA | 0 | 1           | Not-determined  | Genome-fragment | NA   | 0     |
| S12_extracted_k141_124997 | 1100  | No | NA | 0 | 1           | Not-determined  | Genome-fragment | NA   | 0     |
| S12_extracted_k141_164802 | 2829  | No | NA | 0 | 0           | Not-determined  | Genome-fragment | NA   | 0     |
| S12_extracted_k141_86008  | 1686  | No | NA | 0 | 2           | Not-determined  | Genome-fragment | NA   | 0     |
| S12_extracted_k141_31120  | 1058  | No | NA | 0 | 0           | Not-determined  | Genome-fragment | NA   | 0     |
| S12_extracted_k141_70629  | 1752  | No | NA | 0 | 1           | Not-determined  | Genome-fragment | NA   | 0     |
| S12_extracted_k141_86019  | 3016  | No | NA | 0 | 0           | Not-determined  | Genome-fragment | NA   | 0     |
| S12_extracted_k141_70631  | 1523  | No | NA | 0 | 0           | Not-determined  | Genome-fragment | NA   | 0     |
| S12_extracted_k141_31135  | 1047  | No | NA | 0 | 2           | Not-determined  | Genome-fragment | NA   | 0     |
| S12_extracted_k141_154820 | 6021  | No | NA | 0 | 3           | Not-determined  | Genome-fragment | NA   | 0     |
| S10_vs_98883[full]        | 3947  | No | NA | 0 | 4           | Low-quality     | Genome-fragment | NA   | 1.09  |
| S12_extracted_k141_164829 | 1493  | No | NA | 0 | 1           | Not-determined  | Genome-fragment | NA   | 0     |
| S12_extracted_k141_38236  | 1077  | No | NA | 0 | 0           | Not-determined  | Genome-fragment | NA   | 0     |
| S12_extracted_k141_54619  | 1084  | No | NA | 0 | 0           | Not-determined  | Genome-fragment | NA   | 0     |
| S12_extracted_k141_156377 | 1775  | No | NA | 0 | 1           | Not-determined  | Genome-fragment | NA   | 0     |
| S12_extracted_k141_146355 | 1378  | No | NA | 0 | 2           | Not-determined  | Genome-fragment | NA   | 0     |
| S8_extracted_k141_20361   | 3947  | No | NA | 0 | 0           | Low-quality     | Genome-fragment | NA   | 4.49  |
| S12_extracted_k141_172240 | 1528  | No | NA | 0 | 0           | Not-determined  | Genome-fragment | NA   | 0     |
| S12_extracted_k141_156394 | 1508  | No | NA | 0 | 1           | Not-determined  | Genome-fragment | NA   | 0     |
| S12_extracted_k141_54376  | 3629  | No | NA | 0 | 0           | Not-determined  | Genome-fragment | NA   | 0     |
| S12_extracted_k141_78410  | 1185  | No | NA | 0 | 0           | Not-determined  | Genome-fragment | NA   | 0     |
| S12_extracted_k141_14786  | 1257  | No | NA | 0 | 3           | Not-determined  | Genome-fragment | NA   | 0     |
| S12_extracted_k141_172263 | 1069  | No | NA | 0 | 0           | Not-determined  | Genome-fragment | NA   | 0     |
| S12_extracted_k141_23069  | 1201  | No | NA | 0 | 0           | Not-determined  | Genome-fragment | NA   | 0     |
| S12_extracted_k141_86107  | 1279  | No | NA | 0 | 1           | Not-determined  | Genome-fragment | NA   | 0     |
| S12_extracted_k141_180137 | 2018  | No | NA | 0 | 0           | Not-determined  | Genome-fragment | NA   | 0     |
| S12_extracted_k141_172298 | 5421  | No | NA | 0 | 3           | Not-determined  | Genome-fragment | NA   | 0     |
| S12_extracted_k141_172300 | 1271  | No | NA | 0 | 1           | Not-determined  | Genome-fragment | NA   | 0     |
| S12_extracted_k141_14832  | 1362  | No | NA | 0 | 0           | Not-determined  | Genome-fragment | NA   | 0     |
| S12_extracted_k141_148583 | 1991  | No | NA | 0 | 2           | Not-determined  | Genome-fragment | NA   | 0     |
| S12_extracted_k141_78471  | 1149  | No | NA | 0 | 1           | Not-determined  | Genome-fragment | NA   | 0     |
| S12_extracted_k141_78479  | 2251  | No | NA | 0 | 1           | Not-determined  | Genome-fragment | NA   | 0     |
| S12_extracted_k141_38436  | 1295  | No | NA | 0 | 1           | Not-d           |                 |      |       |



|                           |       |     |    |    |    |                |                 |       |       |
|---------------------------|-------|-----|----|----|----|----------------|-----------------|-------|-------|
| S12_extracted_k141_133382 | 1232  | No  | NA | 0  | 1  | Not-determined | Genome-fragment | NA    | 0     |
| S12_extracted_k141_125259 | 2189  | No  | NA | 0  | 1  | Not-determined | Genome-fragment | NA    | 0     |
| S12_extracted_k141_86365  | 1133  | No  | NA | 0  | 1  | Not-determined | Genome-fragment | NA    | 0     |
| S12_extracted_k141_117465 | 1441  | No  | NA | 0  | 1  | Not-determined | Genome-fragment | NA    | 0     |
| S12_extracted_k141_180306 | 1680  | No  | NA | 0  | 1  | Not-determined | Genome-fragment | NA    | 0     |
| S15_extracted_41022       | 3952  | No  | NA | 4  | 0  | Low-quality    | Genome-fragment | 0.99  | 0     |
| S12_extracted_k141_117468 | 1115  | No  | NA | 0  | 0  | Not-determined | Genome-fragment | NA    | 0     |
| S12_extracted_k141_125274 | 1346  | No  | NA | 0  | 0  | Not-determined | Genome-fragment | NA    | 0     |
| S12_extracted_k141_180315 | 1387  | No  | NA | 0  | 0  | Not-determined | Genome-fragment | NA    | 0     |
| S6_extracted_k141_17150   | 3952  | No  | NA | 0  | 1  | Low-quality    | Genome-fragment | 2.38  | 0     |
| S12_extracted_k141_156594 | 8650  | No  | NA | 0  | 2  | Not-determined | Genome-fragment | NA    | 0     |
| S12_extracted_k141_186716 | 1100  | No  | NA | 0  | 0  | Not-determined | Genome-fragment | NA    | 0     |
| S12_extracted_k141_180353 | 1150  | No  | NA | 0  | 3  | Not-determined | Genome-fragment | NA    | 0     |
| S12_extracted_k141_23331  | 1367  | No  | NA | 0  | 1  | Not-determined | Genome-fragment | NA    | 0     |
| S12_extracted_k141_165069 | 1046  | No  | NA | 0  | 0  | Not-determined | Genome-fragment | NA    | 0     |
| S12_extracted_k141_133464 | 2229  | No  | NA | 0  | 1  | Not-determined | Genome-fragment | NA    | 0     |
| S12_extracted_k141_180370 | 1339  | No  | NA | 0  | 1  | Not-determined | Genome-fragment | NA    | 0     |
| S12_extracted_k141_23356  | 1465  | No  | NA | 0  | 0  | Not-determined | Genome-fragment | NA    | 0     |
| S12_extracted_k141_123486 | 2278  | No  | NA | 0  | 1  | Not-determined | Genome-fragment | NA    | 0     |
| S12_extracted_k141_54933  | 3109  | No  | NA | 0  | 2  | Not-determined | Genome-fragment | NA    | 0     |
| S12_extracted_k141_156635 | 8913  | No  | NA | 0  | 5  | Not-determined | Genome-fragment | NA    | 0     |
| S12_extracted_k141_123486 | 1389  | No  | NA | 0  | 1  | Not-determined | Genome-fragment | NA    | 0     |
| S14_extracted_k141_73984  | 3953  | No  | NA | 5  | 0  | Low-quality    | Genome-fragment | 5.5   | 0     |
| S12_extracted_k141_172461 | 1092  | No  | NA | 0  | 1  | Not-determined | Genome-fragment | NA    | 0     |
| S12_extracted_k141_55000  | 1332  | No  | NA | 0  | 1  | Not-determined | Genome-fragment | NA    | 0     |
| S12_extracted_k141_38739  | 1084  | No  | NA | 0  | 0  | Not-determined | Genome-fragment | NA    | 0     |
| S12_extracted_k141_156689 | 1211  | No  | NA | 0  | 1  | Not-determined | Genome-fragment | NA    | 0     |
| S10_vs_31216  full        | 3953  | Yes |    | 1  | 1  | Low-quality    | Genome-fragment |       | 48.95 |
| S12_extracted_k141_172512 | 1356  | No  | NA | 1  | 1  | Not-determined | Genome-fragment | NA    | 0     |
| S12_extracted_k141_125388 | 1455  | No  | NA | 0  | 2  | Not-determined | Genome-fragment | NA    | 0     |
| S12_extracted_k141_188822 | 60827 | No  | NA | 16 | 0  | Complete       | High-quality    | 100   | 0     |
| S12_vs_k141_135400  full  | 3954  | No  | NA | 4  | 0  | Low-quality    | Genome-fragment | 10.63 | 0     |
| S12_extracted_k141_38776  | 1439  | No  | NA | 0  | 0  | Not-determined | Genome-fragment | NA    | 0     |
| S5_extracted_k141_126998  | 3955  | No  | NA | 0  | 0  | Low-quality    | Genome-fragment | 6.11  | 0     |
| S12_extracted_k141_36534  | 1064  | No  | NA | 0  | 1  | Not-determined | Genome-fragment | NA    | 0     |
| S16_extracted_61103       | 3956  | No  | NA | 0  | 0  | Low-quality    | Genome-fragment | 7.93  | 0     |
| S12_extracted_k141_172546 | 3046  | No  | NA | 0  | 3  | Not-determined | Genome-fragment | NA    | 0     |
| S12_extracted_k141_38795  | 1078  | No  | NA | 0  | 2  | Not-determined | Genome-fragment | NA    | 0     |
| S12_extracted_k141_117539 | 2085  | No  | NA | 0  | 1  | Not-determined | Genome-fragment | NA    | 0     |
| S14_extracted_k141_116060 | 3957  | No  | NA | 0  | 3  | Low-quality    | Genome-fragment | 0.98  | 0     |
| S12_extracted_k141_36555  | 1579  | No  | NA | 0  | 1  | Not-determined | Genome-fragment | NA    | 0     |
| S9_extracted_k141_3453    | 3958  | No  | NA | 0  | 0  | Low-quality    | Genome-fragment | 9.89  | 0     |
| S12_extracted_k141_172587 | 1537  | No  | NA | 0  | 0  | Not-determined | Genome-fragment | NA    | 0     |
| S12_extracted_k141_86577  | 2321  | No  | NA | 0  | 0  | Not-determined | Genome-fragment | NA    | 0     |
| S3_extracted_k141_55391   | 3958  | No  | NA | 1  | 0  | Low-quality    | Genome-fragment | 6.76  | 0     |
| S12_extracted_k141_172643 | 1544  | No  | NA | 0  | 1  | Not-determined | Genome-fragment | NA    | 0     |
| S13_extracted_110068      | 3959  | No  | NA | 0  | 0  | Low-quality    | Genome-fragment | 6.19  | 0     |
| S12_extracted_k141_180588 | 4779  | No  | NA | 0  | 7  | Not-determined | Genome-fragment | NA    | 0     |
| S12_extracted_k141_180600 | 1146  | No  | NA | 0  | 1  | Not-determined | Genome-fragment | NA    | 0     |
| S7_vs_107691  full        | 3959  | No  | NA | 3  | 0  | Low-quality    | Genome-fragment | 6.41  | 0     |
| S12_extracted_k141_38915  | 1107  | No  | NA | 0  | 0  | Not-determined | Genome-fragment | NA    | 0     |
| S12_extracted_k141_156827 | 1259  | No  | NA | 0  | 1  | Not-determined | Genome-fragment | NA    | 0     |
| S12_extracted_k141_55080  | 4468  | No  | NA | 0  | 2  | Not-determined | Genome-fragment | NA    | 0     |
| S12_extracted_k141_188824 | 87909 | No  | NA | 16 | 4  | Complete       | High-quality    | 100   | 0     |
| S12_extracted_k141_156850 | 1987  | No  | NA | 0  | 1  | Not-determined | Genome-fragment | NA    | 0     |
| S12_extracted_k141_117095 | 1325  | No  | NA | 0  | 0  | Not-determined | Genome-fragment | NA    | 0     |
| S15_vs_60479  full        | 3959  | No  | NA | 0  | 1  | Low-quality    | Genome-fragment | 4.18  | 0     |
| S9_vs_k141_54641  full    | 3960  | No  | NA | 1  | 0  | Low-quality    | Genome-fragment | 11.28 | 0     |
| S12_extracted_k141_38950  | 1725  | No  | NA | 0  | 0  | Not-determined | Genome-fragment | NA    | 0     |
| S12_extracted_k141_133760 | 1601  | No  | NA | 0  | 0  | Not-determined | Genome-fragment | NA    | 0     |
| S12_extracted_k141_15162  | 5237  | No  | NA | 0  | 4  | Not-determined | Genome-fragment | NA    | 0     |
| S5_extracted_k141_60700   | 3960  | No  | NA | 0  | 0  | Low-quality    | Genome-fragment | 9.71  | 0     |
| S12_extracted_k141_117783 | 1045  | No  | NA | 0  | 1  | Not-determined | Genome-fragment | NA    | 0     |
| S12_extracted_k141_125486 | 1003  | No  | NA | 0  | 1  | Not-determined | Genome-fragment | NA    | 0     |
| S12_extracted_k141_125501 | 1418  | No  | NA | 0  | 1  | Not-determined | Genome-fragment | NA    | 0     |
| S12_extracted_k141_188827 | 2601  | No  | NA | 2  | 0  | Complete       | High-quality    | 100   | 0     |
| S14_vs_k141_73958  full   | 3961  | Yes |    | 2  | 2  | Low-quality    | Genome-fragment | 6.13  | 33.7  |
| S12_extracted_k141_23607  | 1526  | No  | NA | 0  | 1  | Not-determined | Genome-fragment | NA    | 0     |
| S12_extracted_k141_125554 | 1023  | No  | NA | 0  | 0  | Not-determined | Genome-fragment | NA    | 0     |
| S12_extracted_k141_156981 | 1191  | No  | NA | 0  | 1  | Not-determined | Genome-fragment | NA    | 0     |
| S12_vs_k141_72153  full   | 3962  | No  | NA | 0  | 2  | Low-quality    | Genome-fragment | 3.2   | 0     |
| S12_extracted_k141_180634 | 1572  | No  | NA | 0  | 1  | Not-determined | Genome-fragment | NA    | 0     |
| S3_vs_k141_120497  full   | 3963  | No  | NA | 0  | 1  | Low-quality    | Genome-fragment | 6.2   | 0     |
| S12_extracted_k141_39123  | 1440  | No  | NA | 0  | 1  | Not-determined | Genome-fragment | NA    | 0     |
| S12_extracted_k141_188830 | 68192 | No  | NA | 5  | 0  | Complete       | High-quality    | 100   | 0     |
| S12_extracted_k141_172971 | 1651  | No  | NA | 0  | 1  | Not-determined | Genome-fragment | NA    | 0     |
| S12_extracted_k141_15387  | 1214  | No  | NA | 0  | 1  | Not-determined | Genome-fragment | NA    | 0     |
| S12_extracted_k141_39141  | 1983  | No  | NA | 0  | 2  | Not-determined | Genome-fragment | NA    | 0     |
| S12_extracted_k141_15400  | 3312  | No  | NA | 0  | 1  | Not-determined | Genome-fragment | NA    | 0     |
| S12_extracted_k141_157067 | 1041  | No  | NA | 0  | 0  | Not-determined | Genome-fragment | NA    | 0     |
| S16_extracted_155644      | 3963  | No  | NA | 4  | 0  | Low-quality    | Genome-fragment | 11.26 | 0     |
| S10_vs_36963  full        | 3963  | No  | NA | 0  | 0  | Low-quality    | Genome-fragment | 1.94  | 0     |
| S12_extracted_k141_117970 | 1502  | No  | NA | 0  | 2  | Not-determined | Genome-fragment | NA    | 0     |
| S2_vs_k141_12272  full    | 3963  | No  | NA | 0  | 0  | Low-quality    | Genome-fragment | 6.65  | 0     |
| S12_extracted_k141_188838 | 5233  | No  | NA | 1  | 0  | Complete       | High-quality    | 100   | 0     |
| S12_extracted_k141_39211  | 1189  | No  | NA | 0  | 0  | Not-determined | Genome-fragment | NA    | 0     |
| S8_vs_k141_40442  full    | 3963  | No  | NA | 4  | 0  | Low-quality    | Genome-fragment | 11.02 | 0     |
| S8_extracted_k141_98307   | 3964  | No  | NA | 0  | 2  | Low-quality    | Genome-fragment | 2.19  | 0     |
| S12_extracted_k141_173071 | 1217  | No  | NA | 0  | 0  | Not-determined | Genome-fragment | NA    | 0     |
| S1_extracted_k141_150959  | 3965  | No  | NA | 1  | 0  | Low-quality    | Genome-fragment | 6.94  | 0     |
| S12_extracted_k141_157151 | 1016  | No  | NA | 0  | 0  | Not-determined | Genome-fragment | NA    | 0     |
| S12_extracted_k141_188840 | 5661  | No  | NA | 0  | 0  | Complete       | High-quality    | 100   | 0     |
| S12_extracted_k141_39250  | 1282  | No  | NA | 0  | 1  | Not-determined | Genome-fragment | NA    | 0     |
| S12_extracted_k141_188865 | 3605  | No  | NA | 0  | 0  | Not-determined | Genome-fragment | NA    | 0     |
| S12_extracted_k141_180600 | 39980 | No  | NA | 0  | 20 | Not-determined | Genome-fragment | NA    | 100   |
| S12_extracted_k141_118011 | 1381  | No  | NA | 0  | 1  | Not-determined | Genome-fragment | NA    | 0     |
| S8_vs_k141_12223  full    | 3965  | No  | NA | 2  | 0  | Low-quality    | Genome-fragment | 12.21 | 0     |
| S12_extracted_k141_157205 | 1120  | No  | NA | 0  | 2  | Not-determined | Genome-fragment | NA    | 0     |
| S12_extracted_k141_157378 | 1262  | No  | NA | 0  | 1  | Not-determined | Genome-fragment | NA    | 0     |
| S12_extracted_k141_157209 | 1164  | No  | NA | 0  | 1  | Not-determined | Genome-fragment | NA    | 0     |
| S12_extracted_k141_39303  | 2152  | No  | NA | 0  | 1  | Not-determined | Genome-fragment | NA    | 0     |
| S12_extracted_k141_15568  | 2097  | No  | NA | 0  | 2  | Not-determined | Genome-fragment | NA    | 0     |
| S12_extracted_k141_180797 | 3403  | No  | NA | 0  | 1  | Not-determined | Genome-fragment | NA    | 0     |
| S12_extracted_k141_39365  | 2944  | No  | NA | 0  | 2  | Not-determined | Genome-fragment | NA    | 0     |
| S12_extracted_k141_180856 | 1571  | No  | NA | 0  | 1  | Not-determined | Genome-fragment | NA    | 0     |
| S3_extracted_k141_24018   | 3967  | No  | NA | 6  | 0  | Low-quality    | Genome-fragment | 18.1  | 0     |
| S12_extracted_k141_180872 | 1172  | No  | NA | 0  | 1  | Not-determined | Genome-fragment | NA    | 0     |
| S12_extracted_k141_157302 | 1264  | No  | NA | 0  | 0  | Not-determined | Genome-fragment | NA    | 0     |
| S5_vs_k141_52106  full    | 3967  | No  | NA | 0  | 0  | Low-quality    | Genome-fragment | 7.48  | 0     |
| S12_extracted_k141_157350 | 2162  | No  | NA | 0  | 0  | Not-determined | Genome-fragment | NA    | 0     |
| S12_extracted_k141_15721  | 4048  | No  | NA | 0  | 2  | Not-determined | Genome-fragment | NA    | 56.07 |
| S12_extracted_k141_173208 | 18073 | No  | NA | 0  | 0  | Medium-quality | Genome-fragment | NA    | 0     |
| S12_extracted_k141_180895 | 5066  | No  | NA | 3  | 0  | Not-determined | Genome-fragment | NA    | 0     |
| S12_extracted_k141_125938 | 1642  | No  | NA | 0  | 0  | Not-determined | Genome-fragment | NA    | 0     |
| S12_extracted_k141_181024 | 71259 | No  | NA | 21 | 0  | Low-quality    | Genome-fragment | 65.59 | 0     |
| S12_vs_k141_55201  full   | 4212  | No  | NA | 0  | 1  | Not-determined | Genome-fragment | NA    | 0     |
| S12_vs_k141_86928  full   | 41629 | No  | NA | 6  | 2  | Medium-quality | Genome-fragment | 54.85 | 0     |
| S12_vs_k141_97088  full   | 39892 | No  | NA | 23 | 0  | High-quality   | High-quality    | 96.05 | 0     |
| S12_vs_k141_79785  full   | 44275 | No  | NA | 12 | 0  | High-quality   | High-quality    | 97.36 | 0     |
| S16_extracted_71269       | 3968  | No  | NA | 1  | 1  | Low-quality    | Genome-fragment | 2.53  | 0     |
| S12_vs_k141_167155  full  | 42619 | No  | NA | 13 | 0  | High-quality   | High-quality    | 97.15 | 0     |
| S12_vs_k141_18801  full   | 4705  | No  | NA | 5  | 0  | High-quality   | High-quality    | 99.42 | 0     |
| S12_vs_k141_118181  full  | 53432 | No  | NA | 12 | 2  | High-quality   | High-quality    | 99.42 | 0     |
| S12_vs_k141_183891  full  | 5176  | No  | NA | 1  | 0  | High-quality   | High-quality    | 94.21 | 0     |
| S12_vs_k141_105523  full  | 9759  | No  | NA | 0  | 0  | Not-determined | Genome-fragment | NA    | 0     |
| S12_vs_k141_137069  full  | 10908 | No  | NA | 0  | 1  | Medium-quality | Genome-fragment | 74.66 | 0     |
| S8_vs_k141_150226  full   | 3968  | No  | NA | 1  | 0  | Low-quality    | Genome-fragment | 3.9   | 0     |
| S16_extracted_77177       | 3969  | No  | NA | 3  | 0  | Low-quality    | Genome-fragment | 96.05 | 0     |
| S12_vs_k141_188820  full  | 52666 | No  | NA | 14 | 0  | High-quality   | High-quality    | 100   | 0     |
| S12_vs_k141_188821  full  | 59341 | No  | NA | 35 | 2  | High-quality   | High-quality    | 98.95 | 0     |
| S12_vs_k141_188823  full  | 26487 | No  | NA | 9  | 2  | High-quality   | High-quality    | 100   | 0     |
| S12_vs_k141_188825  full  | 41036 | No  | NA | 11 | 0  | Medium-quality | Genome-fragment | 51.07 | 0     |
| S12_vs_k141_188828  full  | 34951 | No  | NA | 13 | 0  | Medium-quality | Genome-fragment | 84.99 | 0     |
| S12_vs_k141_188829  full  | 6511  | No  | NA | 0  | 0  | Not-determined | Genome-fragment | NA    | 0     |
| S12_vs_k141_188832  full  | 4680  | No  | NA | 4  | 0  | High-quality   | High-quality    | 96.7  | 0     |
| S12_vs_k141_188833  full  | 32121 | No  | NA | 14 | 1  | High-quality   | High-quality    | 98.29 | 0     |
| S12_vs_k141_188836  full  | 5325  | No  | NA | 0  | 1  | Not-determined | Genome-fragment | NA    | 0     |
| S12_vs_k141_188841  full  | 3152  | No  | NA | 0  | 0  | Not-determined | Genome-fragment | NA    | 0     |
| S12_vs_k141_188863  full  | 2229  | No  | NA | 0  | 0  | Not-determined | Genome-fragment | NA    | 0     |
| S12_vs_k141_188879  full  | 1799  | No  | NA | 0  | 0  | Not-determined | Genome-fragment | NA    | 0     |
| S16_vs_170430  full       | 3969  | No  | NA | 3  | 0  | Low-quality    | Genome-fragment | 9.97  | 0     |
| S12_vs_k141_165365  full  | 2607  | No  | NA | 0  | 2  | Not-determined | Genome-fragment | NA    | 0     |
| S14_vs_k141_4912  full    | 3971  | No  | NA | 4  | 0  | Low-quality    | Genome-fragment | 10.29 | 0     |
| S3_vs_k141_115485  full   |       |     |    |    |    |                |                 |       |       |



|                           |        |        |     |      |   |                |                 |                 |       |
|---------------------------|--------|--------|-----|------|---|----------------|-----------------|-----------------|-------|
| S12_vx_k141_63121         | [full] | 1154   | NA  | 0    | 1 | Not-determined | Genome-fragment | NA              | 0     |
| S12_vx_k141_204           | [full] | 1877   | NA  | 0    | 0 | Not-determined | Genome-fragment | NA              | 0     |
| S12_vx_k141_118247        | [full] | 1290   | NA  | 0    | 1 | Not-determined | Genome-fragment | NA              | 0     |
| S16_extracted_36055       |        | 3981   | NA  | 7    | 0 | Low-quality    | Genome-fragment | NA              | 13.11 |
| S12_vx_k141_165539        | [full] | 1499   | NA  | 0    | 2 | Not-determined | Genome-fragment | NA              | 0     |
| S12_vx_k141_165542        | [full] | 1888   | NA  | 0    | 0 | Not-determined | Genome-fragment | NA              | 0     |
| S12_vx_k141_141848        | [full] | 2571   | NA  | 0    | 3 | Not-determined | Genome-fragment | NA              | 0     |
| S8_vx_k141_80084          | [full] | 3961   | NA  | 0    | 1 | Low-quality    | Genome-fragment | NA              | 4.63  |
| S12_vx_k141_78888         | [full] | 5523   | NA  | 0    | 5 | Not-determined | Genome-fragment | NA              | 0     |
| S11_vx_k141_27836         | [full] | 3983   | NA  | 0    | 0 | Low-quality    | Genome-fragment | NA              | 4.73  |
| S11_vx_k141_68306         | [full] | 3984   | NA  | 0    | 0 | Low-quality    | Genome-fragment | NA              | 4.47  |
| S12_vx_k141_232           | [full] | 2999   | NA  | 0    | 1 | Not-determined | Genome-fragment | NA              | 0     |
| S12_vx_k141_134002        | [full] | 4199   | NA  | 0    | 3 | Not-determined | Genome-fragment | NA              | 0     |
| S11_vx_k141_89441         | [full] | 3984   | NA  | 0    | 0 | Low-quality    | Genome-fragment | NA              | 7.83  |
| S13_vx_k141_143428        | [full] | 3984   | NA  | 2    | 0 | Low-quality    | Genome-fragment | NA              | 11.03 |
| S1_vx_k141_176103         | [full] | 3985   | NA  | 0    | 1 | Low-quality    | Genome-fragment | NA              | 1.87  |
| S12_vx_k141_173419        | [full] | 1372   | NA  | 0    | 0 | Not-determined | Genome-fragment | NA              | 0     |
| S17_vx_k141_9483          | [full] | 3986   | NA  | 0    | 3 | Low-quality    | Genome-fragment | NA              | 2.22  |
| S12_vx_k141_181297        | [full] | 3980   | NA  | 0    | 3 | Not-determined | Genome-fragment | NA              | 0     |
| S12_vx_k141_102587        | [full] | 2305   | NA  | 0    | 3 | Not-determined | Genome-fragment | NA              | 0     |
| S12_vx_k141_63178         | [full] | 1687   | NA  | 0    | 1 | Not-determined | Genome-fragment | NA              | 0     |
| S17_extracted_k141_165399 |        | 3987   | NA  | 3    | 0 | Low-quality    | Genome-fragment | NA              | 13.14 |
| S12_vx_k141_181304        | [full] | 5181   | NA  | 0    | 3 | Not-determined | Genome-fragment | NA              | 0     |
| S5_extracted_k141_145619  |        | 3988   | NA  | 0    | 0 | Low-quality    | Genome-fragment | NA              | 25.31 |
| S12_vx_k141_94742         | [full] | 3483   | NA  | 0    | 1 | Not-determined | Genome-fragment | NA              | 0     |
| S8_vx_k141_68879          | [full] | 3988   | NA  | 0    | 0 | Low-quality    | Genome-fragment | NA              | 6.72  |
| S3_extracted_k141_65746   |        | 3989   | NA  | 0    | 2 | Low-quality    | Genome-fragment | NA              | 0.35  |
| S16_extracted_36102       |        | 3990   | NA  | 1    | 0 | Low-quality    | Genome-fragment | NA              | 7.84  |
| S5_vx_k141_871513         | [full] | 3991   | NA  | 1    | 0 | Low-quality    | Genome-fragment | NA              | 1.44  |
| S16_vx_440                | [full] | 3991   | NA  | 0    | 0 | Low-quality    | Genome-fragment | NA              | 6.39  |
| S16_vx_172721             | [full] | 3991   | Yes | 1337 | 1 | 1              | Low-quality     | Genome-fragment | 3.03  |
| S12_vx_k141_94769         | [full] | 2526   | NA  | 0    | 0 | Not-determined | Genome-fragment | NA              | 0     |
| S12_vx_k141_8107          | [full] | 4711   | NA  | 0    | 2 | Not-determined | Genome-fragment | NA              | 0     |
| S8_extracted_k141_6781    |        | 3991   | NA  | 0    | 2 | Low-quality    | Genome-fragment | NA              | 1.1   |
| S12_vx_k141_55273         | [full] | 1142   | NA  | 0    | 0 | Not-determined | Genome-fragment | NA              | 0     |
| S12_vx_k141_55277         | [full] | 2854   | NA  | 0    | 1 | Not-determined | Genome-fragment | NA              | 0     |
| S12_vx_k141_102658        | [full] | 1186   | NA  | 0    | 0 | Not-determined | Genome-fragment | NA              | 0     |
| S8_vx_k141_1367           | [full] | 3991   | NA  | 2    | 0 | Low-quality    | Genome-fragment | NA              | 4.91  |
| S12_vx_k141_102677        | [full] | 5365   | NA  | 0    | 0 | Not-determined | Genome-fragment | NA              | 0     |
| S5_vx_k141_104786         | [full] | 3993   | NA  | 0    | 3 | Low-quality    | Genome-fragment | NA              | 4.58  |
| S8_extracted_k141_27258   |        | 3994   | NA  | 0    | 4 | Low-quality    | Genome-fragment | NA              | 3.09  |
| S12_vx_k141_47614         | [full] | 2562   | NA  | 0    | 1 | Not-determined | Genome-fragment | NA              | 0     |
| S14_vx_k141_107244        | [full] | 3995   | Yes | 2704 | 1 | 1              | Low-quality     | Genome-fragment | 7.41  |
| S12_vx_k141_94805         | [full] | 4087   | NA  | 0    | 0 | Not-determined | Genome-fragment | NA              | 0     |
| S8_extracted_k141_10790   |        | 3996   | NA  | 0    | 1 | Low-quality    | Genome-fragment | NA              | 6.8   |
| S12_vx_k141_102692        | [full] | 1554   | NA  | 0    | 2 | Not-determined | Genome-fragment | NA              | 0     |
| S12_vx_k141_94813         | [full] | 1311   | NA  | 0    | 3 | Not-determined | Genome-fragment | NA              | 0     |
| S12_vx_k141_8146          | [full] | 1503   | NA  | 0    | 0 | Not-determined | Genome-fragment | NA              | 0     |
| S12_vx_k141_71175         | [full] | 1584   | NA  | 0    | 0 | Not-determined | Genome-fragment | NA              | 0     |
| S12_vx_k141_79010         | [full] | 1301   | NA  | 0    | 2 | Not-determined | Genome-fragment | NA              | 0     |
| S12_vx_k141_383           | [full] | 2955   | NA  | 0    | 0 | Not-determined | Genome-fragment | NA              | 0     |
| S12_vx_k141_86956         | [full] | 4794   | NA  | 0    | 3 | Not-determined | Genome-fragment | NA              | 0     |
| S12_vx_k141_15932         | [full] | 1796   | NA  | 0    | 2 | Not-determined | Genome-fragment | NA              | 0     |
| S9_extracted_k141_34058   |        | 3997   | NA  | 4    | 0 | Low-quality    | Genome-fragment | NA              | 10.06 |
| S12_vx_k141_71191         | [full] | 1635   | NA  | 0    | 0 | Not-determined | Genome-fragment | NA              | 0     |
| S8_extracted_k141_100158  |        | 3997   | NA  | 0    | 1 | Low-quality    | Genome-fragment | NA              | 8.62  |
| S14_vx_k141_44564         | [full] | 3998   | NA  | 0    | 0 | Low-quality    | Genome-fragment | NA              | 16.18 |
| S12_vx_k141_409           | [full] | 1831   | NA  | 0    | 1 | Not-determined | Genome-fragment | NA              | 0     |
| S17_extracted_k141_131629 |        | 3999   | NA  | 0    | 0 | Low-quality    | Genome-fragment | NA              | 2.09  |
| S17_vx_k141_25199         | [full] | 3999   | NA  | 0    | 0 | Low-quality    | Genome-fragment | NA              | 5.23  |
| S12_vx_k141_55350         | [full] | 1365   | NA  | 0    | 0 | Not-determined | Genome-fragment | NA              | 2.69  |
| S16_vx_28528              | [full] | 3999   | NA  | 0    | 0 | Low-quality    | Genome-fragment | NA              | 9.12  |
| S3_extracted_k141_18408   |        | 4000   | NA  | 0    | 0 | Low-quality    | Genome-fragment | NA              | 9.69  |
| S10_extracted_73108       |        | 4000   | NA  | 2    | 0 | Low-quality    | Genome-fragment | NA              | 9.69  |
| S8_extracted_k141_110817  |        | 4001   | NA  | 0    | 3 | Low-quality    | Genome-fragment | NA              | 2.31  |
| S16_extracted_45652       |        | 4001   | NA  | 0    | 1 | Not-determined | Genome-fragment | NA              | 0     |
| S12_vx_k141_442           | [full] | 2065   | NA  | 0    | 1 | Not-determined | Genome-fragment | NA              | 9.82  |
| S16_vx_5504               | [full] | 4001   | NA  | 1    | 0 | Low-quality    | Genome-fragment | NA              | 0     |
| S12_vx_k141_149889        | [full] | 5083   | NA  | 0    | 1 | Not-determined | Genome-fragment | NA              | 0     |
| S12_vx_k141_87057         | [full] | 2248   | NA  | 0    | 2 | Not-determined | Genome-fragment | NA              | 0     |
| S12_vx_k141_149891        | [full] | 3350   | NA  | 0    | 4 | Not-determined | Genome-fragment | NA              | 0     |
| S12_vx_k141_55429         | [full] | 2441   | NA  | 0    | 0 | Not-determined | Genome-fragment | NA              | 0     |
| S11_extracted_k141_5418   |        | 4002   | NA  | 0    | 3 | Low-quality    | Genome-fragment | NA              | 2.56  |
| S16_extracted_62713       |        | 4002   | Yes | 3336 | 1 | 1              | Low-quality     | Genome-fragment | 5.89  |
| S12_vx_k141_31749         | [full] | 1316   | NA  | 1    | 1 | Not-determined | Genome-fragment | NA              | 0     |
| S16_vx_22901              | [full] | 4002   | NA  | 0    | 0 | Low-quality    | Genome-fragment | NA              | 7.1   |
| S6_vx_k141_16693          | [full] | 4002   | Yes | 2220 | 1 | 1              | Low-quality     | Genome-fragment | 5.14  |
| S9_vx_k141_44257          | [full] | 4004   | NA  | 9    | 0 | Low-quality    | Genome-fragment | NA              | 9.2   |
| S3_vx_k141_122231         | [full] | 4005   | NA  | 0    | 4 | Low-quality    | Genome-fragment | NA              | 4.83  |
| S12_vx_k141_15994         | [full] | 16763  | NA  | 0    | 4 | Not-determined | Genome-fragment | NA              | 0     |
| S12_vx_k141_109830        | [full] | 4005   | NA  | 1    | 0 | Low-quality    | Genome-fragment | NA              | 8.93  |
| S12_vx_k141_110617        | [full] | 10268  | NA  | 0    | 1 | Not-determined | Genome-fragment | NA              | 0     |
| S16_extracted_113913      |        | 4005   | NA  | 0    | 4 | Low-quality    | Genome-fragment | NA              | 2.2   |
| S13_extracted_65574       |        | 4006   | NA  | 0    | 1 | Low-quality    | Genome-fragment | NA              | 7.69  |
| S8_extracted_k141_155448  |        | 4006   | NA  | 0    | 3 | Low-quality    | Genome-fragment | NA              | 2.76  |
| S12_vx_k141_118511        | [full] | 4455   | NA  | 0    | 2 | Not-determined | Genome-fragment | NA              | 0     |
| S12_vx_k141_63442         | [full] | 1216   | NA  | 0    | 2 | Not-determined | Genome-fragment | NA              | 0     |
| S8_extracted_k141_98057   |        | 4007   | NA  | 0    | 4 | Low-quality    | Genome-fragment | NA              | 1.25  |
| S12_vx_k141_160451        | [full] | 8275   | NA  | 0    | 1 | Not-determined | Genome-fragment | NA              | 0     |
| S16_extracted_100765      |        | 4007   | NA  | 0    | 4 | Low-quality    | Genome-fragment | NA              | 0.67  |
| S3_vx_k141_17643          | [full] | 4008   | NA  | 0    | 0 | Low-quality    | Genome-fragment | NA              | 6.67  |
| S12_vx_k141_118540        | [full] | 2587   | NA  | 0    | 0 | Not-determined | Genome-fragment | NA              | 0     |
| S12_vx_k141_8204          | [full] | 155395 | NA  | 28   | 9 | Medium-quality | Genome-fragment | NA              | 86.93 |
| S12_vx_k141_63482         | [full] | 3767   | NA  | 0    | 2 | Not-determined | Genome-fragment | NA              | 1.26  |
| S7_extracted_37789        |        | 4008   | NA  | 1    | 2 | Low-quality    | Genome-fragment | NA              | 8.79  |
| S8_vx_k141_205418         | [full] | 4008   | NA  | 1    | 0 | Low-quality    | Genome-fragment | NA              | 0     |
| S12_vx_k141_157916        | [full] | 5007   | NA  | 0    | 4 | Not-determined | Genome-fragment | NA              | 0     |
| S5_extracted_k141_116577  |        | 4009   | NA  | 0    | 0 | Low-quality    | Genome-fragment | NA              | 9.36  |
| S16_extracted_101437      |        | 4010   | NA  | 0    | 0 | Low-quality    | Genome-fragment | NA              | 6.59  |
| S1_extracted_k141_55161   |        | 4011   | NA  | 1    | 0 | Low-quality    | Genome-fragment | NA              | 9.63  |
| S12_vx_k141_95592         | [full] | 4012   | NA  | 4    | 0 | Low-quality    | Genome-fragment | NA              | 1.65  |
| S5_vx_k141_118051         | [full] | 4012   | NA  | 0    | 1 | Low-quality    | Genome-fragment | NA              | 1.26  |
| S12_vx_k141_47504         | [full] | 1977   | NA  | 0    | 1 | Not-determined | Genome-fragment | NA              | 0     |
| S12_vx_k141_118567        | [full] | 1217   | NA  | 0    | 1 | Not-determined | Genome-fragment | NA              | 0     |
| S12_vx_k141_23923         | [full] | 5830   | NA  | 0    | 4 | Not-determined | Genome-fragment | NA              | 0     |
| S11_vx_k141_83060         | [full] | 4013   | NA  | 2    | 0 | Low-quality    | Genome-fragment | NA              | 7.04  |
| S7_extracted_65369        |        | 4013   | NA  | 3    | 0 | Low-quality    | Genome-fragment | NA              | 8.8   |
| S8_extracted_k141_124441  |        | 4014   | NA  | 2    | 0 | Low-quality    | Genome-fragment | NA              | 9.94  |
| S12_vx_k141_118581        | [full] | 16714  | NA  | 0    | 2 | Not-determined | Genome-fragment | NA              | 0     |
| S3_extracted_k141_101297  |        | 4014   | NA  | 0    | 1 | Low-quality    | Genome-fragment | NA              | 2.69  |
| S16_vx_157701             | [full] | 4014   | NA  | 0    | 1 | Low-quality    | Genome-fragment | NA              | 6.13  |
| S12_vx_k141_150003        | [full] | 2495   | NA  | 0    | 0 | Not-determined | Genome-fragment | NA              | 0     |
| S12_vx_k141_23960         | [full] | 2362   | NA  | 0    | 3 | Not-determined | Genome-fragment | NA              | 0     |
| S12_vx_k141_663           | [full] | 1402   | NA  | 0    | 2 | Not-determined | Genome-fragment | NA              | 10.13 |
| S13_extracted_136487      |        | 4015   | NA  | 0    | 0 | Low-quality    | Genome-fragment | NA              | 0     |
| S12_vx_k141_55559         | [full] | 5921   | NA  | 0    | 2 | Not-determined | Genome-fragment | NA              | 0     |
| S14_vx_k141_111506        | [full] | 4015   | NA  | 0    | 0 | Low-quality    | Genome-fragment | NA              | 7.04  |
| S11_extracted_k141_28124  |        | 4015   | NA  | 0    | 4 | Low-quality    | Genome-fragment | NA              | 0.51  |
| S1_extracted_k141_3717    |        | 4015   | NA  | 0    | 0 | Low-quality    | Genome-fragment | NA              | 1.45  |
| S14_vx_k141_54891         | [full] | 4016   | NA  | 4    | 0 | Low-quality    | Genome-fragment | NA              | 10.53 |
| S5_extracted_k141_85496   |        | 4016   | NA  | 0    | 3 | Low-quality    | Genome-fragment | NA              | 0.35  |
| S5_extracted_k141_115779  |        | 4016   | NA  | 0    | 0 | Low-quality    | Genome-fragment | NA              | 2.24  |
| S5_vx_k141_102030         | [full] | 4016   | NA  | 1    | 0 | Low-quality    | Genome-fragment | NA              | 6.6   |
| S12_vx_k141_713           | [full] | 1243   | NA  | 0    | 1 | Not-determined | Genome-fragment | NA              | 0     |
| S12_vx_k141_150066        | [full] | 1215   | NA  | 0    | 1 | Not-determined | Genome-fragment | NA              | 0     |
| S12_vx_k141_158006        | [full] | 4347   | NA  | 0    | 4 | Not-determined | Genome-fragment | NA              | 0     |
| S12_vx_k141_86937         | [full] | 4016   | NA  | 0    | 2 | Low-quality    | Genome-fragment | NA              | 1.98  |
| S12_vx_k141_181590        | [full] | 1109   | NA  | 0    | 2 | Not-determined | Genome-fragment | NA              | 0     |
| S12_vx_k141_68510         | [full] | 4016   | NA  | 0    | 1 | Low-quality    | Genome-fragment | NA              | 2.16  |
| S11_vx_k141_104077        | [full] | 4019   | NA  | 0    | 1 | Low-quality    | Genome-fragment | NA              | 22.71 |
| S12_vx_k141_126597        | [full] | 2117   | NA  | 0    | 2 | Not-determined | Genome-fragment | NA              | 9.75  |
| S13_extracted_147336      |        | 4020   | NA  | 0    | 0 | Low-quality    | Genome-fragment | NA              | 0     |
| S8_extracted_k141_183954  |        | 4020   | NA  | 1    | 2 | Low-quality    | Genome-fragment | NA              | 2.18  |
| S12_vx_k141_79326         | [full] | 1925   | NA  | 0    | 1 | Not-determined | Genome-fragment | NA              | 0     |
| S12_vx_k141_71375         | [full] | 4521   | NA  | 0    | 2 | Not-determined | Genome-fragment | NA              | 0     |
| S12_vx_k141_8307          | [full] | 2031   | NA  | 0    | 1 | Not-determined | Genome-fragment | NA              | 0     |
| S12_vx_k141_63599         | [full] | 3992   | NA  | 0    | 4 | Not-determined | Genome-fragment | NA              | 0     |
| S3_extracted_k141_91613   |        | 4021   | NA  | 0    | 0 | Low-quality    | Genome-fragment | NA              | 18.3  |
| S12_vx_k141_150103        | [full] | 6616   | NA  | 0    | 3 | Not-determined | Genome-fragment | NA              | 0     |
| S12_vx_k141_63636         | [full] | 1894   | NA  | 0    | 2 | Not-determined | Genome-fragment | NA              | 0     |
| S12_vx_k141_8347          | [full] | 2383   | NA  | 0    | 1 | Not-determined | Genome-fragment | NA              | 0     |
| S12_vx_k141_19504         | [full] | 4021   | NA  | 0    | 0 | Low-quality    | Genome-fragment | NA              | 9.44  |
| S12_vx_k141_71424         | [full] | 7115   | NA  | 0    | 4 | Not-determined | Genome-fragment | NA              | 0     |
| S12_vx_k141_71434         | [full] | 1712   | NA  |      |   |                |                 |                 |       |



|                           |       |     |       |    |    |                |                 |       |       |
|---------------------------|-------|-----|-------|----|----|----------------|-----------------|-------|-------|
| S13_extracted_17442       | 4037  | No  | NA    | 0  | 1  | Low-quality    | Genome-fragment | 9.15  | 0     |
| S7_vs_145881[full]        | 4038  | No  | NA    | 0  | 0  | Low-quality    | Genome-fragment | 10.53 | 0     |
| S7_vs_31554[full]         | 4040  | No  | NA    | 2  | 0  | Low-quality    | Genome-fragment | 4.93  | 0     |
| S12_extracted_k141_132275 | 4040  | No  | NA    | 0  | 2  | Low-quality    | Genome-fragment | 11.84 | 0     |
| S12_vs_k141_47647[full]   | 4035  | No  | NA    | 0  | 1  | Not-determined | Genome-fragment | NA    | 0     |
| S12_extracted_k141_133274 | 4040  | Yes | NA    | 1  | 1  | Low-quality    | Genome-fragment | 4.99  | 56.58 |
| S14_vs_k141_59445[full]   | 4041  | No  | NA    | 2  | 0  | Low-quality    | Genome-fragment | 8.73  | 0     |
| S12_vs_k141_55764[full]   | 4131  | No  | NA    | 0  | 1  | Not-determined | Genome-fragment | NA    | 0     |
| S12_vs_k141_24242[full]   | 1737  | No  | NA    | 0  | 0  | Not-determined | Genome-fragment | NA    | 0     |
| S1_vs_k141_105145[full]   | 4041  | No  | NA    | 1  | 0  | Low-quality    | Genome-fragment | 10.46 | 0     |
| S12_vs_k141_55764[full]   | 1523  | No  | NA    | 0  | 0  | Not-determined | Genome-fragment | NA    | 0     |
| S12_vs_k141_166072[full]  | 1835  | No  | NA    | 0  | 0  | Not-determined | Genome-fragment | NA    | 0     |
| S8_extracted_k141_49342   | 4041  | No  | NA    | 1  | 0  | Low-quality    | Genome-fragment | 3.52  | 0     |
| S12_vs_k141_24251[full]   | 2738  | No  | NA    | 0  | 0  | Not-determined | Genome-fragment | NA    | 0     |
| S14_extracted_k141_3332   | 4042  | No  | NA    | 0  | 0  | Low-quality    | Genome-fragment | 6.88  | 0     |
| S12_vs_k141_150279[full]  | 1444  | No  | NA    | 0  | 0  | Not-determined | Genome-fragment | NA    | 0     |
| S12_vs_k141_24252[full]   | 3111  | No  | NA    | 0  | 2  | Not-determined | Genome-fragment | NA    | 0     |
| S3_extracted_k141_111546  | 4042  | No  | NA    | 1  | 0  | Low-quality    | Genome-fragment | 5.4   | 0     |
| S12_vs_k141_87273[full]   | 1532  | No  | NA    | 0  | 2  | Not-determined | Genome-fragment | NA    | 0     |
| S12_vs_k141_47672[full]   | 1655  | No  | NA    | 0  | 1  | Not-determined | Genome-fragment | NA    | 0     |
| S12_vs_k141_40101[full]   | 2937  | No  | NA    | 0  | 1  | Not-determined | Genome-fragment | NA    | 0     |
| S12_vs_k141_79473[full]   | 1359  | No  | NA    | 0  | 0  | Not-determined | Genome-fragment | NA    | 0     |
| S12_vs_k141_71583[full]   | 1892  | No  | NA    | 0  | 1  | Not-determined | Genome-fragment | NA    | 0     |
| S12_vs_k141_24272[full]   | 2205  | No  | NA    | 0  | 1  | Not-determined | Genome-fragment | NA    | 0     |
| S12_vs_k141_126719[full]  | 1196  | No  | NA    | 0  | 1  | Not-determined | Genome-fragment | NA    | 0     |
| S7_extracted_51570        | 4042  | No  | NA    | 2  | 0  | Low-quality    | Genome-fragment | 6.55  | 0     |
| S12_vs_k141_71596[full]   | 2409  | No  | NA    | 0  | 2  | Not-determined | Genome-fragment | NA    | 0     |
| S17_extracted_k141_139176 | 4043  | No  | NA    | 0  | 2  | Low-quality    | Genome-fragment | 8.66  | 0     |
| S12_vs_k141_150344[full]  | 1122  | No  | NA    | 0  | 0  | Not-determined | Genome-fragment | NA    | 0     |
| S1_vs_k141_52811[full]    | 4043  | No  | NA    | 0  | 0  | Low-quality    | Genome-fragment | 9.86  | 0     |
| S8_vs_k141_187294[full]   | 4043  | No  | NA    | 0  | 1  | Low-quality    | Genome-fragment | 3.8   | 0     |
| S11_vs_k141_139221[full]  | 4045  | No  | NA    | 0  | 0  | Low-quality    | Genome-fragment | 3.65  | 0     |
| S12_vs_k141_63824[full]   | 4547  | No  | NA    | 0  | 2  | Not-determined | Genome-fragment | NA    | 0     |
| S14_vs_k141_105024[full]  | 4045  | No  | NA    | 0  | 0  | Low-quality    | Genome-fragment | 9.54  | 0     |
| S12_vs_k141_977[full]     | 1713  | No  | NA    | 0  | 1  | Not-determined | Genome-fragment | NA    | 0     |
| S12_vs_k141_24324[full]   | 3456  | No  | NA    | 0  | 1  | Not-determined | Genome-fragment | NA    | 0     |
| S3_vs_k141_85254[full]    | 4045  | No  | NA    | 0  | 2  | Low-quality    | Genome-fragment | 2.29  | 0     |
| S5_extracted_k141_118632  | 4045  | No  | NA    | 4  | 0  | Low-quality    | Genome-fragment | 12.13 | 0     |
| S12_vs_k141_156201[full]  | 4046  | No  | NA    | 0  | 0  | Low-quality    | Genome-fragment | 6.76  | 0     |
| S12_vs_k141_40166[full]   | 1238  | No  | NA    | 0  | 0  | Not-determined | Genome-fragment | NA    | 0     |
| S12_vs_k141_126755[full]  | 2834  | No  | NA    | 0  | 0  | Not-determined | Genome-fragment | NA    | 0     |
| S12_vs_k141_22226[full]   | 15546 | No  | NA    | 0  | 6  | Not-determined | Genome-fragment | NA    | 0     |
| S10_vs_19074[full]        | 4048  | No  | NA    | 1  | 0  | Low-quality    | Genome-fragment | 11.79 | 0     |
| S12_vs_k141_134465[full]  | 1326  | No  | NA    | 0  | 0  | Not-determined | Genome-fragment | NA    | 0     |
| S3_extracted_k141_31868   | 4049  | No  | NA    | 0  | 0  | Low-quality    | Genome-fragment | 3.57  | 0     |
| S7_vs_71633[full]         | 4049  | No  | NA    | 0  | 1  | Low-quality    | Genome-fragment | 7     | 0     |
| S14_vs_k141_75227[full]   | 4050  | No  | NA    | 0  | 3  | Low-quality    | Genome-fragment | 1.78  | 0     |
| S12_vs_k141_79549[full]   | 1687  | No  | NA    | 0  | 0  | Not-determined | Genome-fragment | NA    | 0     |
| S8_extracted_k141_43192   | 4050  | No  | NA    | 0  | 0  | Low-quality    | Genome-fragment | NA    | 0     |
| S12_vs_k141_40190[full]   | 1056  | No  | NA    | 0  | 1  | Not-determined | Genome-fragment | 0.57  | 0     |
| S14_extracted_k141_15657  | 4052  | No  | NA    | 7  | 0  | Low-quality    | Genome-fragment | 13.38 | 0     |
| S16_extracted_25602       | 4052  | No  | NA    | 7  | 0  | Low-quality    | Genome-fragment | NA    | 0     |
| S12_vs_k141_142625[full]  | 80692 | Yes | 41808 | 5  | 23 | Complete       | High-quality    | 100   | 48.19 |
| S12_vs_k141_87420[full]   | 1508  | No  | NA    | 0  | 0  | Not-determined | Genome-fragment | NA    | 0     |
| S12_vs_k141_134493[full]  | 1421  | No  | NA    | 0  | 1  | Not-determined | Genome-fragment | NA    | 0     |
| S12_vs_k141_95283[full]   | 3346  | No  | NA    | 0  | 2  | Not-determined | Genome-fragment | NA    | 0     |
| S12_vs_k141_158327[full]  | 3920  | No  | NA    | 0  | 4  | Not-determined | Genome-fragment | NA    | 0     |
| S12_vs_k141_1008[full]    | 1760  | No  | NA    | 0  | 1  | Not-determined | Genome-fragment | NA    | 0     |
| S16_vs_57466[full]        | 4052  | No  | NA    | 0  | 1  | Low-quality    | Genome-fragment | 2.56  | 0     |
| S12_vs_k141_134525[full]  | 5832  | No  | NA    | 0  | 4  | Not-determined | Genome-fragment | NA    | 0     |
| S12_vs_k141_75135[full]   | 4054  | No  | NA    | 3  | 0  | Low-quality    | Genome-fragment | 10.86 | 0     |
| S12_vs_k141_47819[full]   | 8712  | No  | NA    | 0  | 2  | Not-determined | Genome-fragment | NA    | 0     |
| S12_vs_k141_142660[full]  | 1756  | No  | NA    | 0  | 2  | Not-determined | Genome-fragment | NA    | 0     |
| S12_vs_k141_129855[full]  | 4055  | No  | NA    | 2  | 0  | Low-quality    | Genome-fragment | 9.55  | 0     |
| S5_vs_k141_4604[full]     | 4055  | No  | NA    | 2  | 2  | Low-quality    | Genome-fragment | 8.11  | 0     |
| S12_vs_k141_166250[full]  | 1471  | No  | NA    | 0  | 0  | Not-determined | Genome-fragment | NA    | 0     |
| S12_vs_k141_16406[full]   | 1637  | No  | NA    | 0  | 2  | Not-determined | Genome-fragment | NA    | 0     |
| S12_vs_k141_16412[full]   | 1465  | No  | NA    | 0  | 1  | Not-determined | Genome-fragment | NA    | 0     |
| S12_vs_k141_181967[full]  | 1395  | No  | NA    | 0  | 0  | Not-determined | Genome-fragment | NA    | 0     |
| S8_vs_k141_132824[full]   | 4055  | No  | NA    | 0  | 1  | Low-quality    | Genome-fragment | 3.39  | 0     |
| S12_vs_k141_181984[full]  | 2142  | No  | NA    | 0  | 1  | Not-determined | Genome-fragment | NA    | 0     |
| S11_extracted_k141_78751  | 4056  | No  | NA    | 0  | 0  | Low-quality    | Genome-fragment | 4.5   | 0     |
| S14_vs_k141_2765[full]    | 4058  | No  | NA    | 2  | 0  | Low-quality    | Genome-fragment | 4.48  | 0     |
| S12_vs_k141_142729[full]  | 2308  | No  | NA    | 0  | 1  | Not-determined | Genome-fragment | NA    | 0     |
| S1_vs_k141_155286[full]   | 4058  | No  | NA    | 0  | 2  | Low-quality    | Genome-fragment | 1.21  | 0     |
| S3_extracted_k141_58167   | 4058  | No  | NA    | 0  | 0  | Low-quality    | Genome-fragment | NA    | 0     |
| S12_vs_k141_150465[full]  | 2709  | No  | NA    | 0  | 0  | Not-determined | Genome-fragment | NA    | 0     |
| S12_vs_k141_126867[full]  | 1893  | No  | NA    | 0  | 1  | Not-determined | Genome-fragment | NA    | 0     |
| S12_vs_k141_8646[full]    | 3812  | No  | NA    | 0  | 0  | Not-determined | Genome-fragment | NA    | 0     |
| S5_vs_k141_90404[full]    | 4059  | No  | NA    | 2  | 1  | Low-quality    | Genome-fragment | 9.78  | 0     |
| S12_vs_k141_79642[full]   | 6344  | No  | NA    | 0  | 2  | Not-determined | Genome-fragment | NA    | 0     |
| S8_vs_k141_70971[full]    | 4059  | No  | NA    | 0  | 0  | Low-quality    | Genome-fragment | 9.47  | 0     |
| S12_vs_k141_95388[full]   | 2070  | No  | NA    | 0  | 1  | Not-determined | Genome-fragment | NA    | 0     |
| S12_vs_k141_16483[full]   | 2857  | No  | NA    | 0  | 3  | Not-determined | Genome-fragment | NA    | 0     |
| S12_vs_112325[full]       | 4060  | No  | NA    | 0  | 1  | Low-quality    | Genome-fragment | 6.52  | 0     |
| S12_vs_k141_71723[full]   | 1750  | No  | NA    | 0  | 1  | Not-determined | Genome-fragment | NA    | 0     |
| S5_extracted_k141_59144   | 4060  | No  | NA    | 3  | 0  | Low-quality    | Genome-fragment | 4.05  | 0     |
| S16_extracted_14737       | 4060  | No  | NA    | 0  | 1  | Low-quality    | Genome-fragment | 6.98  | 0     |
| S12_vs_k141_173959[full]  | 3043  | No  | NA    | 0  | 0  | Not-determined | Genome-fragment | NA    | 0     |
| S8_vs_k141_137023[full]   | 4060  | No  | NA    | 0  | 3  | Low-quality    | Genome-fragment | 6.13  | 0     |
| S14_extracted_k141_62123  | 4061  | No  | NA    | 4  | 0  | Low-quality    | Genome-fragment | 13.4  | 0     |
| S8_extracted_k141_113373  | 4061  | No  | NA    | 0  | 0  | Not-determined | Genome-fragment | 0.82  | 0     |
| S5_vs_k141_42837[full]    | 4062  | No  | NA    | 2  | 0  | Low-quality    | Genome-fragment | 10.07 | 0     |
| S12_vs_k141_103454[full]  | 1099  | No  | NA    | 0  | 1  | Not-determined | Genome-fragment | NA    | 0     |
| S12_vs_k141_119074[full]  | 2748  | No  | NA    | 0  | 0  | Not-determined | Genome-fragment | NA    | 0     |
| S10_extracted_7499        | 4063  | No  | NA    | 0  | 2  | Low-quality    | Genome-fragment | 6.17  | 0     |
| S12_vs_k141_95460[full]   | 1790  | No  | NA    | 0  | 0  | Not-determined | Genome-fragment | NA    | 0     |
| S12_vs_k141_56137[full]   | 1312  | No  | NA    | 0  | 1  | Not-determined | Genome-fragment | NA    | 0     |
| S12_vs_k141_165200[full]  | 1412  | No  | NA    | 0  | 1  | Not-determined | Genome-fragment | NA    | 0     |
| S10_vs_32950[full]        | 4063  | No  | NA    | 0  | 1  | Low-quality    | Genome-fragment | 8.72  | 0     |
| S12_vs_k141_119079[full]  | 2455  | No  | NA    | 0  | 2  | Not-determined | Genome-fragment | NA    | 0     |
| S1_extracted_k141_66977   | 4064  | No  | NA    | 0  | 1  | Low-quality    | Genome-fragment | 2.1   | 0     |
| S12_vs_k141_103456[full]  | 16298 | No  | NA    | 0  | 10 | Not-determined | Genome-fragment | NA    | 0     |
| S5_vs_k141_140346[full]   | 4065  | No  | NA    | 4  | 0  | Low-quality    | Genome-fragment | 10.6  | 0     |
| S12_vs_k141_95476[full]   | 1186  | No  | NA    | 2  | 0  | Not-determined | Genome-fragment | NA    | 0     |
| S12_vs_k141_71789[full]   | 5566  | No  | NA    | 0  | 4  | Not-determined | Genome-fragment | NA    | 0     |
| S12_vs_k141_166406[full]  | 2613  | No  | NA    | 0  | 1  | Not-determined | Genome-fragment | NA    | 0     |
| S5_vs_k141_42162[full]    | 4065  | No  | NA    | 1  | 0  | Low-quality    | Genome-fragment | 6.93  | 0     |
| S17_vs_k141_139429[full]  | 4066  | No  | NA    | 0  | 0  | Low-quality    | Genome-fragment | 2.41  | 0     |
| S8_extracted_k141_61370   | 4066  | No  | NA    | 0  | 0  | Low-quality    | Genome-fragment | 2.53  | 0     |
| S8_extracted_k141_206798  | 4066  | No  | NA    | 0  | 2  | Low-quality    | Genome-fragment | 12.99 | 0     |
| S1_extracted_k141_58012   | 4068  | No  | NA    | 0  | 0  | Not-determined | Genome-fragment | 9.38  | 0     |
| S1_vs_k141_98050[full]    | 4068  | No  | NA    | 1  | 0  | Low-quality    | Genome-fragment | 9.97  | 0     |
| S14_vs_k141_45459[full]   | 4069  | No  | NA    | 0  | 0  | Low-quality    | Genome-fragment | 10.47 | 0     |
| S3_extracted_k141_20647   | 4069  | No  | NA    | 0  | 0  | Low-quality    | Genome-fragment | 10.43 | 0     |
| S12_vs_k141_56209[full]   | 1003  | No  | NA    | 0  | 0  | Not-determined | Genome-fragment | NA    | 0     |
| S12_vs_k141_103529[full]  | 1135  | No  | NA    | 0  | 1  | Not-determined | Genome-fragment | NA    | 0     |
| S5_vs_k141_43603[full]    | 4069  | No  | NA    | 0  | 1  | Low-quality    | Genome-fragment | 4.15  | 0     |
| S12_vs_k141_40425[full]   | 3783  | No  | NA    | 0  | 0  | Not-determined | Genome-fragment | NA    | 0     |
| S12_vs_k141_115118[full]  | 1568  | No  | NA    | 0  | 0  | Not-determined | Genome-fragment | NA    | 0     |
| S12_vs_k141_56241[full]   | 1720  | No  | NA    | 0  | 0  | Not-determined | Genome-fragment | NA    | 0     |
| S12_vs_k141_48045[full]   | 32825 | No  | NA    | 23 | 0  | Medium-quality | Genome-fragment | 64.36 | 0     |
| S7_vs_98161[full]         | 4071  | No  | NA    | 1  | 0  | Low-quality    | Genome-fragment | 9.81  | 0     |
| S12_vs_136809[full]       | 4071  | No  | NA    | 1  | 0  | Low-quality    | Genome-fragment | 9.35  | 0     |
| S12_vs_k141_95581[full]   | 2307  | No  | NA    | 0  | 2  | Not-determined | Genome-fragment | NA    | 0     |
| S12_vs_k141_16647[full]   | 1839  | No  | NA    | 0  | 2  | Not-determined | Genome-fragment | NA    | 0     |
| S15_vs_52680[full]        | 4071  | No  | NA    | 1  | 0  | Low-quality    | Genome-fragment | 2.92  | 0     |
| S17_vs_k141_102356[full]  | 4072  | No  | NA    | 0  | 3  | Low-quality    | Genome-fragment | 2.21  | 0     |
| S12_vs_k141_174107[full]  | 3604  | No  | NA    | 0  | 0  | Not-determined | Genome-fragment | NA    | 0     |
| S7_vs_111896[full]        | 4072  | No  | NA    | 2  | 0  | Low-quality    | Genome-fragment | 2.74  | 0     |
| S9_extracted_k141_10433   | 4073  | No  | NA    | 0  | 0  | Low-quality    | Genome-fragment | 2.92  | 0     |
| S12_vs_k141_87660[full]   | 5504  | No  | NA    | 0  | 4  | Not-determined | Genome-fragment | NA    | 0     |
| S12_vs_k141_127010[full]  | 5329  | No  | NA    | 0  | 0  | Not-determined | Genome-fragment | NA    | 0     |
| S12_vs_k141_48091[full]   | 1313  | No  | NA    | 0  | 0  | Not-determined | Genome-fragment | NA    | 0     |
| S12_vs_k141_174133[full]  | 1750  | No  | NA    | 0  | 1  | Not-determined | Genome-fragment | NA    | 0     |
| S12_vs_k141_134689[full]  | 6043  | No  | NA    | 0  | 6  | Not-determined | Genome-fragment | NA    | 0     |
| S12_vs_k141_64193[full]   | 5736  | No  | NA    | 0  | 2  | Not-determined | Genome-fragment | NA    | 0     |
| S16_vs_150569[full]       | 4073  | No  | NA    | 1  | 0  | Low-quality    | Genome-fragment | 1.96  | 0     |
| S8_vs_k141_140381[full]   | 4073  | No  | NA    | 2  | 0  | Low-quality    | Genome-fragment | 4.78  | 0     |
| S12_vs_k141_24750[full]   | 1212  | No  | NA    | 0  | 0  | Not-determined | Genome-fragment | NA    | 0     |
| S12_vs_k141_40530[full]   | 2032  | No  | NA    | 0  | 0  | Not-determined | Genome-fragment | NA    | 0     |
| S17_vs_k141_74304[full]   | 4074  | No  | NA    | 0  | 1  | Low-quality    | Genome-fragment | 0.99  | 0     |
| S14_extracted_k141_21405  | 4074  | No  | NA    | 8  | 0  | Low-quality    | Genome-fragment | 1     |       |



|                           |        |       |     |      |    |   |                |                 |       |       |
|---------------------------|--------|-------|-----|------|----|---|----------------|-----------------|-------|-------|
| S16_vs_1083941            | [full] | 4085  | No  | NA   | 0  | 0 | Low-quality    | Genome-fragment | 6.75  | 0     |
| S12_vs_k141_1311          | [full] | 10090 | No  | NA   | 0  | 2 | Not-determined | Genome-fragment | NA    | 0     |
| S13_vs_2577               | [full] | 4086  | No  | NA   | 1  | 0 | Low-quality    | Genome-fragment | 3.44  | 0     |
| S3_vs_k141_37550          | [full] | 4087  | Yes | 1864 | 1  | 1 | Low-quality    | Genome-fragment | 3.91  | 54.39 |
| S12_vs_k141_134785        | [full] | 3626  | No  | NA   | 0  | 1 | Not-determined | Genome-fragment | NA    | 0     |
| S12_vs_k141_56414         | [full] | 1742  | No  | NA   | 0  | 0 | Not-determined | Genome-fragment | NA    | 0     |
| S12_vs_k141_24886         | [full] | 1908  | No  | NA   | 0  | 4 | Not-determined | Genome-fragment | NA    | 0     |
| S12_vs_k141_219349        | [full] | 6436  | No  | NA   | 0  | 4 | Not-determined | Genome-fragment | NA    | 0     |
| S10_vs_101684             | [full] | 4087  | No  | NA   | 0  | 4 | Low-quality    | Genome-fragment | 1.63  | 0     |
| S12_vs_k141_134817        | [full] | 1307  | No  | NA   | 0  | 0 | Not-determined | Genome-fragment | NA    | 0     |
| S8_vs_k141_92331          | [full] | 4087  | No  | NA   | 0  | 2 | Low-quality    | Genome-fragment | 1.51  | 0     |
| S9_vs_k141_9171           | [full] | 4088  | No  | NA   | 1  | 1 | Low-quality    | Genome-fragment | 8.38  | 0     |
| S12_vs_k141_182401        | [full] | 1529  | No  | NA   | 0  | 0 | Not-determined | Genome-fragment | NA    | 0     |
| S12_vs_k141_56452         | [full] | 1030  | No  | NA   | 0  | 0 | Not-determined | Genome-fragment | NA    | 0     |
| S13_extracted_23202       |        | 4088  | No  | NA   | 0  | 2 | Low-quality    | Genome-fragment | 5.52  | 0     |
| S4_extracted_10991        |        | 4088  | No  | NA   | 3  | 1 | Low-quality    | Genome-fragment | 4.47  | 0     |
| S12_vs_k141_1401          | [full] | 2531  | No  | NA   | 0  | 0 | Not-determined | Genome-fragment | NA    | 0     |
| S5_vs_k141_106346         | [full] | 4090  | No  | NA   | 8  | 0 | Low-quality    | Genome-fragment | 8.82  | 0     |
| S4_extracted_29911        |        | 4090  | No  | NA   | 0  | 1 | Low-quality    | Genome-fragment | 7.59  | 0     |
| S1_vs_k141_27803          | [full] | 4091  | No  | NA   | 0  | 1 | Low-quality    | Genome-fragment | 2.76  | 0     |
| S12_vs_k141_182450        | [full] | 2205  | No  | NA   | 0  | 0 | Not-determined | Genome-fragment | NA    | 0     |
| S12_vs_k141_158568        | [full] | 2003  | No  | NA   | 0  | 0 | Not-determined | Genome-fragment | NA    | 0     |
| S3_vs_k141_94098          | [full] | 4091  | No  | NA   | 0  | 1 | Low-quality    | Genome-fragment | 3.57  | 0     |
| S12_vs_k141_8983          | [full] | 2195  | No  | NA   | 0  | 0 | Not-determined | Genome-fragment | NA    | 0     |
| S12_vs_k141_40710         | [full] | 2344  | No  | NA   | 0  | 2 | Not-determined | Genome-fragment | NA    | 0     |
| S5_extracted_k141_11938   |        | 4091  | No  | NA   | 0  | 0 | Low-quality    | Genome-fragment | 9.76  | 0     |
| S12_vs_k141_2583          | [full] | 4091  | No  | NA   | 0  | 2 | Low-quality    | Genome-fragment | 1.99  | 0     |
| S12_vs_k141_16893         | [full] | 3010  | No  | NA   | 0  | 3 | Not-determined | Genome-fragment | NA    | 0     |
| S15_vs_75971              | [full] | 4091  | No  | NA   | 0  | 0 | Low-quality    | Genome-fragment | 7.14  | 0     |
| S12_vs_k141_134909        | [full] | 1269  | No  | NA   | 0  | 0 | Not-determined | Genome-fragment | NA    | 0     |
| S1_vs_k141_65763          | [full] | 4092  | No  | NA   | 0  | 0 | Low-quality    | Genome-fragment | 2.66  | 0     |
| S12_vs_k141_24974         | [full] | 2717  | No  | NA   | 0  | 1 | Not-determined | Genome-fragment | NA    | 0     |
| S14_extracted_k141_59379  |        | 4093  | No  | NA   | 5  | 0 | Low-quality    | Genome-fragment | 9.9   | 0     |
| S5_vs_k141_134204         | [full] | 4093  | No  | NA   | 1  | 0 | Low-quality    | Genome-fragment | 9.35  | 0     |
| S12_vs_k141_158632        | [full] | 2141  | No  | NA   | 0  | 1 | Not-determined | Genome-fragment | NA    | 0     |
| S12_vs_k141_24984         | [full] | 4239  | No  | NA   | 0  | 0 | Not-determined | Genome-fragment | NA    | 0     |
| S12_vs_k141_24985         | [full] | 2349  | No  | NA   | 0  | 2 | Not-determined | Genome-fragment | NA    | 0     |
| S12_vs_k141_182512        | [full] | 3242  | No  | NA   | 0  | 2 | Not-determined | Genome-fragment | NA    | 0     |
| S12_vs_k141_9062          | [full] | 3610  | No  | NA   | 0  | 3 | Not-determined | Genome-fragment | NA    | 0     |
| S16_extracted_156512      |        | 4093  | No  | NA   | 0  | 0 | Low-quality    | Genome-fragment | 3.76  | 0     |
| S12_vs_k141_88026         | [full] | 2166  | No  | NA   | 0  | 1 | Not-determined | Genome-fragment | NA    | 0     |
| S12_vs_k141_119431        | [full] | 2516  | No  | NA   | 0  | 4 | Not-determined | Genome-fragment | NA    | 0     |
| S17_vs_k141_65027         | [full] | 4094  | No  | NA   | 0  | 2 | Low-quality    | Genome-fragment | 0.47  | 0     |
| S11_extracted_k141_3076   |        | 4094  | No  | NA   | 2  | 0 | Low-quality    | Genome-fragment | 11.2  | 0     |
| S12_vs_k141_111280        | [full] | 65591 | No  | NA   | 13 | 4 | High-quality   | High-quality    | 100   | 0     |
| S12_vs_k141_88061         | [full] | 7670  | No  | NA   | 0  | 2 | Not-determined | Genome-fragment | NA    | 0     |
| S12_vs_k141_53638         | [full] | 4094  | No  | NA   | 4  | 0 | Low-quality    | Genome-fragment | 11.92 | 0     |
| S5_extracted_k141_18626   |        | 4095  | No  | NA   | 0  | 0 | Low-quality    | Genome-fragment | 6.79  | 0     |
| S12_vs_k141_16955         | [full] | 1796  | No  | NA   | 0  | 1 | Not-determined | Genome-fragment | NA    | 0     |
| S12_vs_k141_135057        | [full] | 2103  | No  | NA   | 0  | 1 | Not-determined | Genome-fragment | NA    | 0     |
| S12_vs_k141_56610         | [full] | 6991  | No  | NA   | 0  | 0 | Not-determined | Genome-fragment | NA    | 0     |
| S12_vs_k141_25064         | [full] | 2248  | No  | NA   | 0  | 1 | Not-determined | Genome-fragment | NA    | 0     |
| S12_vs_k141_9123          | [full] | 3610  | No  | NA   | 0  | 3 | Not-determined | Genome-fragment | NA    | 0     |
| S12_vs_k141_79933         | [full] | 1328  | No  | NA   | 0  | 1 | Not-determined | Genome-fragment | NA    | 0     |
| S12_vs_k141_23622         | [full] | 2170  | No  | NA   | 2  | 0 | Not-determined | Genome-fragment | NA    | 0     |
| S10_vs_85887              | [full] | 4095  | No  | NA   | 0  | 0 | Low-quality    | Genome-fragment | 9.96  | 0     |
| S12_vs_k141_150784        | [full] | 2835  | No  | NA   | 0  | 0 | Not-determined | Genome-fragment | NA    | 0     |
| S12_extracted_k141_98049  |        | 4096  | No  | NA   | 0  | 2 | Low-quality    | Genome-fragment | 1.56  | 0     |
| S12_vs_k141_166053        | [full] | 1145  | No  | NA   | 0  | 1 | Not-determined | Genome-fragment | NA    | 0     |
| S12_vs_k141_79975         | [full] | 1016  | No  | NA   | 0  | 1 | Not-determined | Genome-fragment | NA    | 0     |
| S10_vs_120773             | [full] | 4097  | No  | NA   | 0  | 0 | Low-quality    | Genome-fragment | 4.29  | 0     |
| S12_vs_k141_25113         | [full] | 2815  | No  | NA   | 0  | 3 | Not-determined | Genome-fragment | NA    | 0     |
| S12_extracted_k141_95101  |        | 4097  | No  | NA   | 0  | 0 | Low-quality    | Genome-fragment | 5.23  | 0     |
| S9_vs_k141_27479          | [full] | 4098  | Yes | 1951 | 1  | 1 | Low-quality    | Genome-fragment | 4.38  | 52.39 |
| S12_vs_k141_917           | [full] | 1381  | No  | NA   | 1  | 1 | Not-determined | Genome-fragment | NA    | 0     |
| S12_vs_k141_150812        | [full] | 37545 | No  | NA   | 31 | 0 | Medium-quality | Genome-fragment | 82.79 | 0     |
| S12_vs_k141_25148         | [full] | 1339  | No  | NA   | 0  | 0 | Not-determined | Genome-fragment | NA    | 0     |
| S12_vs_k141_135135        | [full] | 1270  | No  | NA   | 0  | 0 | Not-determined | Genome-fragment | NA    | 0     |
| S12_vs_k141_17054         | [full] | 2779  | No  | NA   | 0  | 1 | Not-determined | Genome-fragment | NA    | 0     |
| S12_vs_k141_9198          | [full] | 1541  | No  | NA   | 0  | 0 | Not-determined | Genome-fragment | NA    | 0     |
| S12_extracted_k141_42786  |        | 4098  | No  | NA   | 0  | 0 | Low-quality    | Genome-fragment | 3.71  | 0     |
| S12_vs_k141_50722         | [full] | 1815  | No  | NA   | 0  | 1 | Not-determined | Genome-fragment | NA    | 0     |
| S12_vs_k141_182624        | [full] | 1766  | No  | NA   | 0  | 3 | Not-determined | Genome-fragment | NA    | 0     |
| S12_vs_k141_80022         | [full] | 1635  | No  | NA   | 0  | 0 | Not-determined | Genome-fragment | NA    | 0     |
| S12_vs_k141_1590          | [full] | 1402  | No  | NA   | 0  | 0 | Not-determined | Genome-fragment | NA    | 0     |
| S12_vs_k141_174401        | [full] | 2292  | No  | NA   | 0  | 1 | Not-determined | Genome-fragment | NA    | 0     |
| S8_vs_k141_41060          | [full] | 4098  | No  | NA   | 0  | 4 | Low-quality    | Genome-fragment | 4.42  | 0     |
| S12_vs_k141_143202        | [full] | 1239  | No  | NA   | 0  | 1 | Not-determined | Genome-fragment | NA    | 0     |
| S17_vs_k141_103952        | [full] | 4099  | No  | NA   | 2  | 0 | Low-quality    | Genome-fragment | 8.22  | 0     |
| S14_extracted_k141_87818  |        | 4099  | Yes | 1521 | 1  | 2 | Low-quality    | Genome-fragment | 1.88  | 62.89 |
| S12_vs_k141_96080         | [full] | 1619  | No  | NA   | 0  | 2 | Not-determined | Genome-fragment | NA    | 0     |
| S8_vs_k141_59060          | [full] | 4099  | No  | NA   | 0  | 0 | Low-quality    | Genome-fragment | 9.84  | 0     |
| S3_vs_k141_60942          | [full] | 4100  | No  | NA   | 0  | 0 | Low-quality    | Genome-fragment | 5.21  | 0     |
| S9_extracted_k141_39647   |        | 4101  | No  | NA   | 2  | 0 | Low-quality    | Genome-fragment | 6.85  | 0     |
| S12_vs_k141_96092         | [full] | 4018  | No  | NA   | 0  | 0 | Not-determined | Genome-fragment | NA    | 0     |
| S14_vs_k141_98469         | [full] | 4101  | No  | NA   | 8  | 0 | Low-quality    | Genome-fragment | 12.33 | 0     |
| S3_vs_k141_54800          | [full] | 4101  | No  | NA   | 0  | 2 | Low-quality    | Genome-fragment | 1.57  | 0     |
| S11_extracted_k141_78950  |        | 4103  | No  | NA   | 1  | 0 | Low-quality    | Genome-fragment | 11.46 | 0     |
| S12_vs_k141_181071        | [full] | 4006  | No  | NA   | 0  | 2 | Not-determined | Genome-fragment | NA    | 0     |
| S12_vs_k141_150896        | [full] | 1436  | No  | NA   | 0  | 1 | Not-determined | Genome-fragment | NA    | 0     |
| S12_vs_k141_174449        | [full] | 1814  | No  | NA   | 0  | 0 | Not-determined | Genome-fragment | NA    | 0     |
| S12_vs_k141_127483        | [full] | 1439  | No  | NA   | 0  | 1 | Not-determined | Genome-fragment | NA    | 0     |
| S12_vs_k141_150918        | [full] | 6181  | No  | NA   | 0  | 0 | Not-determined | Genome-fragment | NA    | 0     |
| S13_vs_126847             | [full] | 4103  | No  | NA   | 0  | 2 | Low-quality    | Genome-fragment | 5.68  | 0     |
| S12_vs_k141_64638         | [full] | 2196  | No  | NA   | 0  | 0 | Not-determined | Genome-fragment | NA    | 0     |
| S12_vs_k141_1668          | [full] | 1549  | No  | NA   | 0  | 1 | Not-determined | Genome-fragment | NA    | 0     |
| S12_vs_k141_119760        | [full] | 1442  | No  | NA   | 0  | 0 | Not-determined | Genome-fragment | NA    | 0     |
| S12_vs_k141_166978        | [full] | 5259  | No  | NA   | 0  | 3 | Not-determined | Genome-fragment | NA    | 0     |
| S12_extracted_k141_124606 |        | 4103  | No  | NA   | 0  | 1 | Low-quality    | Genome-fragment | 1.53  | 0     |
| S16_vs_112276             | [full] | 4105  | No  | NA   | 0  | 0 | Low-quality    | Genome-fragment | 0.47  | 0     |
| S6_extracted_k141_51289   |        | 4105  | No  | NA   | 0  | 0 | Low-quality    | Genome-fragment | 2.6   | 0     |
| S12_vs_k141_96198         | [full] | 1009  | No  | NA   | 0  | 1 | Not-determined | Genome-fragment | NA    | 0     |
| S10_vs_32553              | [full] | 4107  | No  | NA   | 4  | 0 | Low-quality    | Genome-fragment | 6.76  | 0     |
| S5_vs_k141_134182         | [full] | 4108  | No  | NA   | 0  | 2 | Low-quality    | Genome-fragment | 3.77  | 0     |
| S16_extracted_103774      |        | 4108  | No  | NA   | 0  | 1 | Low-quality    | Genome-fragment | 1.16  | 0     |
| S14_vs_k141_100305        | [full] | 4109  | No  | NA   | 0  | 2 | Low-quality    | Genome-fragment | 1.43  | 0     |
| S12_vs_k141_111464        | [full] | 6132  | No  | NA   | 0  | 4 | Not-determined | Genome-fragment | NA    | 0     |
| S10_vs_37578              | [full] | 4103  | No  | NA   | 1  | 0 | Low-quality    | Genome-fragment | 12.62 | 0     |
| S12_vs_k141_127541        | [full] | 2457  | No  | NA   | 0  | 0 | Not-determined | Genome-fragment | NA    | 0     |
| S12_vs_k141_143317        | [full] | 2382  | No  | NA   | 0  | 3 | Not-determined | Genome-fragment | NA    | 0     |
| S9_extracted_k141_38480   |        | 4112  | No  | NA   | 3  | 0 | Low-quality    | Genome-fragment | 2.43  | 0     |
| S9_extracted_k141_73618   |        | 4113  | No  | NA   | 0  | 0 | Low-quality    | Genome-fragment | 10.39 | 0     |
| S3_vs_k141_70464          | [full] | 4114  | No  | NA   | 0  | 1 | Low-quality    | Genome-fragment | 2.51  | 0     |
| S12_vs_k141_143337        | [full] | 1358  | No  | NA   | 0  | 2 | Not-determined | Genome-fragment | NA    | 0     |
| S12_vs_k141_54712         | [full] | 1937  | No  | NA   | 0  | 1 | Not-determined | Genome-fragment | NA    | 0     |
| S12_vs_k141_48358         | [full] | 1862  | No  | NA   | 0  | 2 | Not-determined | Genome-fragment | NA    | 0     |
| S12_vs_k141_64742         | [full] | 2365  | No  | NA   | 0  | 2 | Not-determined | Genome-fragment | NA    | 0     |
| S5_extracted_k141_8996    |        | 4114  | No  | NA   | 2  | 0 | Low-quality    | Genome-fragment | 3.67  | 0     |
| S12_vs_k141_56909         | [full] | 2245  | No  | NA   | 0  | 0 | Not-determined | Genome-fragment | NA    | 0     |
| S12_vs_k141_1767          | [full] | 4119  | No  | NA   | 0  | 5 | Not-determined | Genome-fragment | NA    | 0     |
| S12_vs_k141_25299         | [full] | 1037  | No  | NA   | 0  | 2 | Not-determined | Genome-fragment | NA    | 0     |
| S8_extracted_k141_178878  |        | 4114  | No  | NA   | 0  | 0 | Low-quality    | Genome-fragment | 9.64  | 0     |
| S12_vs_k141_56955         | [full] | 2072  | No  | NA   | 0  | 1 | Not-determined | Genome-fragment | NA    | 0     |
| S12_vs_k141_25319         | [full] | 4474  | No  | NA   | 0  | 3 | Not-determined | Genome-fragment | NA    | 0     |
| S9_vs_k141_7829           | [full] | 4115  | No  | NA   | 0  | 0 | Low-quality    | Genome-fragment | 10.34 | 0     |
| S12_vs_k141_56956         | [full] | 7097  | No  | NA   | 0  | 2 | Not-determined | Genome-fragment | NA    | 0     |
| S12_vs_k141_119927        | [full] | 2754  | No  | NA   | 0  | 1 | Not-determined | Genome-fragment | NA    | 0     |
| S12_vs_k141_121220        | [full] | 4115  | No  | NA   | 0  | 2 | Low-quality    | Genome-fragment | 2.23  | 0     |
| S12_vs_k141_25337         | [full] | 1862  | No  | NA   | 0  | 0 | Not-determined | Genome-fragment | NA    | 0     |
| S12_vs_k141_150997        | [full] | 2342  | No  | NA   | 0  | 1 | Not-determined | Genome-fragment | NA    | 0     |
| S12_vs_k141_135320        | [full] | 1944  | No  | NA   | 0  | 2 | Not-determined | Genome-fragment | NA    | 0     |
| S12_vs_k141_49031         | [full] | 2439  | No  | NA   | 0  | 2 | Not-determined | Genome-fragment | NA    | 0     |
| S12_vs_k141_48453         | [full] | 2698  | No  | NA   | 0  | 1 | Not-determined | Genome-fragment | NA    | 0     |
| S7_extracted_125481       |        | 4116  | No  | NA   | 0  | 0 | Low-quality    | Genome-fragment | 6.32  | 0     |
| S7_vs_67090               | [full] | 4116  | No  | NA   | 0  | 0 | Low-quality    | Genome-fragment | 7.69  | 0     |
| S14_vs_k141_73061         | [full] | 4118  | No  | NA   | 0  | 1 | Low-quality    | Genome-fragment | 7.67  | 0     |
| S1_vs_k141_37371          | [full] | 4118  | No  | NA   | 2  |   |                |                 |       |       |



|                           |        |      |     |       |    |   |                |                 |    |       |       |
|---------------------------|--------|------|-----|-------|----|---|----------------|-----------------|----|-------|-------|
| S12_vx_k141_48575         | [full] | 1012 | No  | NA    | 0  | 0 | Not-determined | Genome-fragment | NA | 0     | 0     |
| S12_vx_k141_57221         | [full] | 2046 | No  | NA    | 0  | 0 | Not-determined | Genome-fragment | NA | 0     | 0     |
| S14_extracted_k141_59107  |        | 4133 | No  | NA    | 1  | 0 | Low-quality    | Genome-fragment | NA | 2.84  | 0     |
| S17_extracted_k141_164187 |        | 4134 | No  | NA    | 2  | 0 | Low-quality    | Genome-fragment | NA | 10.78 | 0     |
| S10_extracted_3009        |        | 4134 | No  | NA    | 3  | 0 | Low-quality    | Genome-fragment | NA | 7.9   | 0     |
| S12_vx_k141_174571        | [full] | 2026 | No  | NA    | 0  | 0 | Not-determined | Genome-fragment | NA | 0     | 0     |
| S12_vx_k141_52376         | [full] | 4134 | No  | NA    | 3  | 0 | Low-quality    | Genome-fragment | NA | 8.17  | 0     |
| S14_extracted_k141_15370  |        | 4135 | No  | NA    | 10 | 0 | Low-quality    | Genome-fragment | NA | 13.65 | 0     |
| S12_vx_k141_57232         | [full] | 6740 | No  | NA    | 0  | 1 | Not-determined | Genome-fragment | NA | 0     | 0     |
| S16_extracted_166255      |        | 4136 | No  | NA    | 0  | 0 | Low-quality    | Genome-fragment | NA | 6.43  | 0     |
| S12_vx_k141_328001        | [full] | 3614 | No  | NA    | 0  | 0 | Not-determined | Genome-fragment | NA | 0     | 0     |
| S12_vx_k141_167286        | [full] | 1836 | No  | NA    | 0  | 0 | Not-determined | Genome-fragment | NA | 0     | 0     |
| S12_vx_k141_64564         | [full] | 1341 | No  | NA    | 0  | 0 | Not-determined | Genome-fragment | NA | 0     | 0     |
| S8_vx_k141_77748          | [full] | 4136 | Yes | 3455  | 3  | 1 | Low-quality    | Genome-fragment | NA | 8.73  | 16.47 |
| S11_extracted_k141_17135  |        | 4138 | No  | NA    | 2  | 0 | Low-quality    | Genome-fragment | NA | 1.6   | 0     |
| S12_vx_k141_135495        | [full] | 1588 | No  | NA    | 0  | 0 | Not-determined | Genome-fragment | NA | 0     | 0     |
| S12_vx_k141_57257         | [full] | 3524 | No  | NA    | 0  | 1 | Not-determined | Genome-fragment | NA | 0     | 0     |
| S7_extracted_108199       |        | 4138 | Yes | 1006  | 1  | 1 | Low-quality    | Genome-fragment | NA | 2.11  | 75.69 |
| S12_vx_k141_88577         | [full] | 2618 | No  | NA    | 0  | 1 | Not-determined | Genome-fragment | NA | 0     | 0     |
| S7_vx_92219               | [full] | 4139 | No  | NA    | 0  | 1 | Low-quality    | Genome-fragment | NA | 9.83  | 0     |
| S12_vx_k141_183002        | [full] | 1001 | No  | NA    | 0  | 0 | Not-determined | Genome-fragment | NA | 6.86  | 0     |
| S8_extracted_k141_6562    |        | 4139 | No  | NA    | 0  | 1 | Low-quality    | Genome-fragment | NA | 3.46  | 45.27 |
| S17_vx_k141_164661        | [full] | 4140 | Yes | 2266  | 1  | 2 | Low-quality    | Genome-fragment | NA | 0     | 0     |
| S12_vx_k141_104373        | [full] | 4241 | No  | NA    | 0  | 2 | Not-determined | Genome-fragment | NA | 0     | 0     |
| S14_vx_k141_04518         | [full] | 4141 | No  | NA    | 0  | 2 | Low-quality    | Genome-fragment | NA | 3.36  | 0     |
| S12_vx_k141_650001        | [full] | 2680 | No  | NA    | 0  | 0 | Not-determined | Genome-fragment | NA | 0     | 0     |
| S12_vx_k141_174583        | [full] | 1922 | No  | NA    | 0  | 2 | Not-determined | Genome-fragment | NA | 0     | 0     |
| S3_extracted_k141_93744   |        | 4141 | No  | NA    | 4  | 0 | Low-quality    | Genome-fragment | NA | 6.18  | 0     |
| S12_vx_k141_48677         | [full] | 1658 | No  | NA    | 0  | 0 | Not-determined | Genome-fragment | NA | 0     | 0     |
| S8_extracted_k141_95743   |        | 4141 | No  | NA    | 0  | 4 | Low-quality    | Genome-fragment | NA | 2.03  | 0     |
| S12_vx_k141_17553         | [full] | 2405 | No  | NA    | 0  | 1 | Not-determined | Genome-fragment | NA | 0     | 0     |
| S8_vx_k141_91273          | [full] | 4141 | No  | NA    | 0  | 1 | Low-quality    | Genome-fragment | NA | 3.27  | 0     |
| S12_vx_k141_80271         | [full] | 3232 | No  | NA    | 0  | 1 | Not-determined | Genome-fragment | NA | 0     | 0     |
| S12_vx_k141_158970        | [full] | 4041 | No  | NA    | 0  | 1 | Not-determined | Genome-fragment | NA | 0     | 0     |
| S12_vx_k141_41320         | [full] | 5883 | No  | NA    | 0  | 0 | Not-determined | Genome-fragment | NA | 0     | 0     |
| S12_vx_k141_57341         | [full] | 8974 | No  | NA    | 0  | 1 | Not-determined | Genome-fragment | NA | 0     | 0     |
| S12_vx_k141_183054        | [full] | 3055 | No  | NA    | 0  | 2 | Not-determined | Genome-fragment | NA | 0     | 0     |
| S1_extracted_k141_34185   |        | 4142 | No  | NA    | 1  | 0 | Low-quality    | Genome-fragment | NA | 12.08 | 0     |
| S12_vx_k141_32914         | [full] | 2124 | No  | NA    | 0  | 1 | Not-determined | Genome-fragment | NA | 0     | 0     |
| S4_extracted_23853        |        | 4143 | No  | NA    | 0  | 2 | Low-quality    | Genome-fragment | NA | 3.14  | 0     |
| S7_vx_77365               | [full] | 4144 | Yes | 2569  | 2  | 1 | Low-quality    | Genome-fragment | NA | 5.91  | 38.01 |
| S12_vx_k141_96741         | [full] | 1339 | No  | NA    | 0  | 0 | Not-determined | Genome-fragment | NA | 0     | 0     |
| S12_vx_k141_41346         | [full] | 1002 | No  | NA    | 0  | 0 | Not-determined | Genome-fragment | NA | 0     | 0     |
| S12_vx_k141_80307         | [full] | 1525 | No  | NA    | 0  | 0 | Not-determined | Genome-fragment | NA | 0     | 0     |
| S12_vx_k141_41349         | [full] | 1317 | No  | NA    | 0  | 0 | Not-determined | Genome-fragment | NA | 0     | 0     |
| S6_extracted_k141_28278   |        | 4144 | No  | NA    | 0  | 0 | Low-quality    | Genome-fragment | NA | 13.67 | 0     |
| S14_extracted_k141_58273  |        | 4146 | No  | NA    | 4  | 0 | Low-quality    | Genome-fragment | NA | 9.11  | 0     |
| S1_vx_k141_79099          | [full] | 4146 | No  | NA    | 3  | 0 | Low-quality    | Genome-fragment | NA | 7.04  | 0     |
| S12_vx_k141_2086          | [full] | 1480 | No  | NA    | 0  | 3 | Not-determined | Genome-fragment | NA | 0     | 0     |
| S16_extracted_144864      |        | 4146 | No  | NA    | 0  | 2 | Low-quality    | Genome-fragment | NA | 5.59  | 0     |
| S12_vx_k141_183104        | [full] | 1232 | No  | NA    | 0  | 0 | Not-determined | Genome-fragment | NA | 2.23  | 0     |
| S12_vx_108551             | [full] | 4147 | No  | NA    | 0  | 2 | Low-quality    | Genome-fragment | NA | 0     | 0     |
| S12_vx_k141_167340        | [full] | 5315 | No  | NA    | 0  | 1 | Not-determined | Genome-fragment | NA | 0     | 0     |
| S12_vx_k141_17611         | [full] | 2721 | No  | NA    | 0  | 1 | Not-determined | Genome-fragment | NA | 0     | 0     |
| S14_extracted_k141_60185  |        | 4147 | No  | NA    | 10 | 0 | Low-quality    | Genome-fragment | NA | 13.59 | 0     |
| S7_extracted_9312         |        | 4147 | No  | NA    | 1  | 0 | Low-quality    | Genome-fragment | NA | 6.87  | 0     |
| S8_extracted_k141_78769   |        | 4147 | No  | NA    | 0  | 3 | Low-quality    | Genome-fragment | NA | 7.15  | 0     |
| S16_vx_5560               | [full] | 4148 | No  | NA    | 0  | 0 | Low-quality    | Genome-fragment | NA | 0     | 0     |
| S12_vx_k141_80365         | [full] | 4621 | No  | NA    | 0  | 3 | Not-determined | Genome-fragment | NA | 0     | 0     |
| S12_vx_k141_25687         | [full] | 5568 | No  | NA    | 0  | 6 | Not-determined | Genome-fragment | NA | 0     | 0     |
| S12_vx_k141_17640         | [full] | 1250 | No  | NA    | 0  | 1 | Not-determined | Genome-fragment | NA | 13.69 | 0     |
| S17_extracted_k141_13607  |        | 4150 | No  | NA    | 0  | 0 | Low-quality    | Genome-fragment | NA | 0     | 0     |
| S12_vx_k141_88660         | [full] | 2184 | No  | NA    | 0  | 2 | Not-determined | Genome-fragment | NA | 0     | 0     |
| S12_vx_k141_151177        | [full] | 1743 | No  | NA    | 0  | 0 | Not-determined | Genome-fragment | NA | 0     | 0     |
| S17_extracted_k141_124889 |        | 4150 | No  | NA    | 0  | 0 | Low-quality    | Genome-fragment | NA | 9.31  | 0     |
| S12_vx_k141_33027         | [full] | 2690 | No  | NA    | 0  | 1 | Not-determined | Genome-fragment | NA | 0     | 0     |
| S1_vx_k141_158536         | [full] | 4150 | No  | NA    | 1  | 0 | Low-quality    | Genome-fragment | NA | 9.55  | 0     |
| S7_vx_12606               | [full] | 4150 | No  | NA    | 3  | 0 | Low-quality    | Genome-fragment | NA | 0     | 0     |
| S12_vx_k141_2154          | [full] | 3995 | No  | NA    | 0  | 1 | Not-determined | Genome-fragment | NA | 8.32  | 0     |
| S12_vx_k141_41425         | [full] | 2993 | No  | NA    | 0  | 0 | Not-determined | Genome-fragment | NA | 0     | 0     |
| S11_vx_k141_49252         | [full] | 4152 | No  | NA    | 1  | 3 | Low-quality    | Genome-fragment | NA | 1.64  | 33.69 |
| S12_vx_k141_135649        | [full] | 2428 | No  | NA    | 0  | 0 | Not-determined | Genome-fragment | NA | 0     | 0     |
| S13_extracted_77420       |        | 4152 | Yes | 2753  | 2  | 1 | Low-quality    | Genome-fragment | NA | 0     | 0     |
| S12_vx_k141_127909        | [full] | 6876 | No  | NA    | 0  | 3 | Not-determined | Genome-fragment | NA | 0     | 0     |
| S12_vx_k141_33055         | [full] | 2591 | No  | NA    | 0  | 2 | Not-determined | Genome-fragment | NA | 7.82  | 0     |
| S5_vx_k141_3629           | [full] | 4152 | No  | NA    | 0  | 1 | Low-quality    | Genome-fragment | NA | 9.71  | 0     |
| S10_vx_85757              | [full] | 4152 | No  | NA    | 0  | 1 | Low-quality    | Genome-fragment | NA | 2.37  | 0     |
| S12_vx_k141_111791        | [full] | 1689 | No  | NA    | 0  | 1 | Not-determined | Genome-fragment | NA | 2.32  | 8.19  |
| S12_vx_k141_448839        | [full] | 5862 | No  | NA    | 0  | 1 | Not-determined | Genome-fragment | NA | 5.53  | 0     |
| S9_vx_k141_23687          | [full] | 4153 | No  | NA    | 1  | 0 | Low-quality    | Genome-fragment | NA | 11.58 | 0     |
| S11_extracted_k141_78449  |        | 4153 | Yes | 3813  | 2  | 3 | Low-quality    | Genome-fragment | NA | 3.95  | 0     |
| S12_extracted_k141_60045  |        | 4153 | No  | NA    | 0  | 0 | Low-quality    | Genome-fragment | NA | 1.28  | 0     |
| S1_extracted_k141_20576   |        | 4154 | No  | NA    | 2  | 0 | Low-quality    | Genome-fragment | NA | 3.95  | 0     |
| S2_extracted_k141_18540   |        | 4154 | No  | NA    | 1  | 0 | Low-quality    | Genome-fragment | NA | 3.68  | 0     |
| S5_vx_k141_219537         | [full] | 4156 | No  | NA    | 0  | 0 | Low-quality    | Genome-fragment | NA | 0     | 0     |
| S12_vx_k141_135693        | [full] | 1128 | No  | NA    | 0  | 0 | Not-determined | Genome-fragment | NA | 0     | 0     |
| S12_vx_k141_48837         | [full] | 2911 | No  | NA    | 0  | 0 | Not-determined | Genome-fragment | NA | 3.86  | 0     |
| S12_extracted_k141_159399 |        | 4156 | No  | NA    | 0  | 0 | Low-quality    | Genome-fragment | NA | 11.71 | 0     |
| S9_vx_k141_17462          | [full] | 4157 | No  | NA    | 0  | 0 | Low-quality    | Genome-fragment | NA | 0     | 0     |
| S12_vx_k141_127958        | [full] | 2193 | No  | NA    | 0  | 2 | Not-determined | Genome-fragment | NA | 1.18  | 0     |
| S12_vx_k141_33142         | [full] | 2605 | No  | NA    | 0  | 0 | Not-determined | Genome-fragment | NA | 0     | 0     |
| S16_extracted_2975        |        | 4157 | No  | NA    | 2  | 0 | Low-quality    | Genome-fragment | NA | 0     | 0     |
| S12_vx_k141_159213        | [full] | 1386 | No  | NA    | 0  | 1 | Not-determined | Genome-fragment | NA | 0     | 0     |
| S12_vx_k141_80553         | [full] | 1360 | No  | NA    | 0  | 0 | Not-determined | Genome-fragment | NA | 10.43 | 0     |
| S17_extracted_k141_29656  |        | 4158 | No  | NA    | 0  | 2 | Not-determined | Genome-fragment | NA | 0     | 0     |
| S12_vx_k141_17789         | [full] | 2171 | No  | NA    | 0  | 0 | Not-determined | Genome-fragment | NA | 0     | 0     |
| S12_vx_k141_120489        | [full] | 1672 | No  | NA    | 0  | 0 | Not-determined | Genome-fragment | NA | 0     | 0     |
| S12_vx_k141_151292        | [full] | 6936 | Yes | 57412 | 11 | 4 | Medium-quality | Genome-fragment | NA | 81.3  | 10.18 |
| S3_extracted_k141_41440   |        | 4158 | No  | NA    | 0  | 0 | Low-quality    | Genome-fragment | NA | 7.38  | 0     |
| S17_extracted_k141_174340 |        | 4159 | No  | NA    | 1  | 0 | Low-quality    | Genome-fragment | NA | 4.12  | 0     |
| S8_extracted_k141_7626    |        | 4159 | No  | NA    | 2  | 0 | Low-quality    | Genome-fragment | NA | 0     | 0     |
| S12_vx_k141_104571        | [full] | 1926 | No  | NA    | 0  | 2 | Not-determined | Genome-fragment | NA | 7.41  | 0     |
| S12_vx_k141_135756        | [full] | 1203 | No  | NA    | 0  | 1 | Not-determined | Genome-fragment | NA | 6.5   | 0     |
| S11_vx_k141_3170          | [full] | 4163 | No  | NA    | 2  | 0 | Low-quality    | Genome-fragment | NA | 2.69  | 0     |
| S12_vx_k141_182254        | [full] | 1669 | No  | NA    | 0  | 0 | Not-determined | Genome-fragment | NA | 6.85  | 0     |
| S13_extracted_93908       |        | 4163 | No  | NA    | 1  | 1 | Low-quality    | Genome-fragment | NA | 0     | 0     |
| S13_extracted_k141_67998  |        | 4163 | No  | NA    | 0  | 3 | Low-quality    | Genome-fragment | NA | 0     | 0     |
| S12_extracted_k141_78988  |        | 4163 | No  | NA    | 0  | 2 | Low-quality    | Genome-fragment | NA | 3.14  | 0     |
| S12_vx_k141_41604         | [full] | 1436 | No  | NA    | 0  | 0 | Not-determined | Genome-fragment | NA | 0     | 0     |
| S12_vx_k141_120530        | [full] | 3119 | No  | NA    | 0  | 2 | Not-determined | Genome-fragment | NA | 0     | 0     |
| S5_vx_k141_16565          | [full] | 4164 | No  | NA    | 0  | 0 | Low-quality    | Genome-fragment | NA | 6.74  | 0     |
| S12_vx_k141_65296         | [full] | 2177 | No  | NA    | 0  | 0 | Not-determined | Genome-fragment | NA | 0     | 0     |
| S12_vx_k141_57563         | [full] | 1063 | No  | NA    | 0  | 0 | Not-determined | Genome-fragment | NA | 0     | 0     |
| S15_extracted_26462       |        | 4164 | No  | NA    | 2  | 0 | Low-quality    | Genome-fragment | NA | 0     | 0     |
| S12_vx_k141_151357        | [full] | 1575 | No  | NA    | 0  | 0 | Not-determined | Genome-fragment | NA | 0     | 0     |
| S12_vx_k141_159248        | [full] | 4479 | No  | NA    | 0  | 3 | Not-determined | Genome-fragment | NA | 0     | 0     |
| S12_vx_k141_65310         | [full] | 1932 | No  | NA    | 0  | 2 | Not-determined | Genome-fragment | NA | 21.31 | 0     |
| S8_vx_k141_161777         | [full] | 4164 | No  | NA    | 4  | 0 | Low-quality    | Genome-fragment | NA | 1.36  | 0     |
| S7_vx_100805              | [full] | 4165 | No  | NA    | 0  | 0 | Low-quality    | Genome-fragment | NA | 2.24  | 0     |
| S12_vx_k141_51493         | [full] | 4167 | No  | NA    | 0  | 0 | Low-quality    | Genome-fragment | NA | 2.56  | 0     |
| S12_vx_k141_159284        | [full] | 1915 | No  | NA    | 0  | 1 | Not-determined | Genome-fragment | NA | 0     | 0     |
| S3_extracted_k141_107758  |        | 4167 | No  | NA    | 0  | 0 | Low-quality    | Genome-fragment | NA | 0     | 0     |
| S7_extracted_72720        |        | 4167 | No  | NA    | 4  | 0 | Low-quality    | Genome-fragment | NA | 6.41  | 0     |
| S12_vx_k141_97096         | [full] | 3268 | No  | NA    | 0  | 0 | Not-determined | Genome-fragment | NA | 5.13  | 0     |
| S17_extracted_k141_51781  |        | 4168 | No  | NA    | 2  | 0 | Not-determined | Genome-fragment | NA | 0     | 0     |
| S12_vx_k141_111923        | [full] | 3172 | No  | NA    | 0  | 0 | Not-determined | Genome-fragment | NA | 0     | 0     |
| S16_vx_15876              | [full] | 4168 | No  | NA    | 6  | 0 | Low-quality    | Genome-fragment | NA | 0     | 0</   |



|                           |       |     |       |    |    |                |                 |       |       |
|---------------------------|-------|-----|-------|----|----|----------------|-----------------|-------|-------|
| S8_extracted_k141_107925  | 4182  | No  | NA    | 1  | 0  | Low-quality    | Genome-fragment | 13.14 | 0     |
| S14_vx_k141_53721  full   | 4183  | No  | NA    | 0  | 0  | Low-quality    | Genome-fragment | 10.9  | 0     |
| S12_vx_k141_104847  full  | 1780  | No  | NA    | 0  | 0  | Not-determined | Genome-fragment | NA    | 0     |
| S12_vx_k141_97408  full   | 7407  | No  | NA    | 0  | 4  | Not-determined | Genome-fragment | NA    | 0     |
| S16_vx_34990  full        | 4183  | No  | NA    | 0  | 0  | Low-quality    | Genome-fragment | 5.01  | 0     |
| S6_extracted_k141_29619   | 4183  | No  | NA    | 0  | 3  | Low-quality    | Genome-fragment | 7.48  | 0     |
| S12_vx_k141_80974  full   | 2404  | No  | NA    | 0  | 0  | Not-determined | Genome-fragment | NA    | 0     |
| S12_vx_k141_41995  full   | 3107  | No  | NA    | 0  | 1  | Not-determined | Genome-fragment | NA    | 0     |
| S12_vx_k141_80976  full   | 1427  | No  | NA    | 0  | 1  | Not-determined | Genome-fragment | NA    | 0     |
| S12_vx_k141_144251  full  | 2546  | No  | NA    | 0  | 1  | Not-determined | Genome-fragment | NA    | 0     |
| S8_vx_k141_166494  full   | 4183  | No  | NA    | 0  | 2  | Low-quality    | Genome-fragment | 1.32  | 0     |
| S12_vx_k141_26122  full   | 1455  | No  | NA    | 0  | 2  | Not-determined | Genome-fragment | NA    | 0     |
| S11_vx_k141_43117  full   | 4184  | No  | NA    | 0  | 0  | Low-quality    | Genome-fragment | 6.94  | 0     |
| S12_vx_k141_80992  full   | 1670  | No  | NA    | 0  | 1  | Not-determined | Genome-fragment | NA    | 0     |
| S12_vx_k141_26133  full   | 1388  | No  | NA    | 0  | 2  | Not-determined | Genome-fragment | NA    | 0     |
| S12_vx_k141_89309  full   | 6505  | No  | NA    | 0  | 6  | Not-determined | Genome-fragment | NA    | 0     |
| S7_vx_113356  full        | 4184  | No  | NA    | 0  | 3  | Low-quality    | Genome-fragment | 5.68  | 0     |
| S16_extracted_7084        | 4184  | No  | NA    | 1  | 0  | Low-quality    | Genome-fragment | 8.58  | 0     |
| S12_vx_k141_104888  full  | 2411  | No  | NA    | 0  | 2  | Not-determined | Genome-fragment | NA    | 0     |
| S14_vx_k141_5988  full    | 4185  | No  | NA    | 2  | 0  | Low-quality    | Genome-fragment | 12.54 | 0     |
| S12_vx_k141_183609  full  | 2338  | No  | NA    | 0  | 4  | Not-determined | Genome-fragment | NA    | 0     |
| S12_vx_k141_65658  full   | 2606  | No  | NA    | 0  | 2  | Not-determined | Genome-fragment | NA    | 0     |
| S12_vx_k141_89349  full   | 1682  | No  | NA    | 0  | 2  | Not-determined | Genome-fragment | NA    | 0     |
| S3_vx_k141_55769  full    | 4186  | No  | NA    | 3  | 0  | Low-quality    | Genome-fragment | 6.99  | 0     |
| S5_vx_k141_80491  full    | 4186  | No  | NA    | 3  | 0  | Low-quality    | Genome-fragment | 10.4  | 0     |
| S12_vx_k141_2628  full    | 1427  | No  | NA    | 0  | 2  | Not-determined | Genome-fragment | NA    | 0     |
| S12_vx_k141_26203  full   | 1259  | No  | NA    | 0  | 0  | Not-determined | Genome-fragment | NA    | 0     |
| S12_vx_k141_159545  full  | 1714  | No  | NA    | 0  | 3  | Not-determined | Genome-fragment | NA    | 0     |
| S16_extracted_117064      | 4186  | No  | NA    | 0  | 0  | Low-quality    | Genome-fragment | 7.42  | 0     |
| S12_vx_k141_9887  full    | 2339  | No  | NA    | 0  | 2  | Not-determined | Genome-fragment | NA    | 0     |
| S8_extracted_k141_58618   | 4186  | No  | NA    | 0  | 3  | Low-quality    | Genome-fragment | 1.64  | 0     |
| S12_vx_k141_42084  full   | 1871  | No  | NA    | 0  | 2  | Not-determined | Genome-fragment | NA    | 0     |
| S12_vx_k141_159546  full  | 2580  | No  | NA    | 0  | 0  | Not-determined | Genome-fragment | NA    | 0     |
| S5_extracted_k141_119568  | 4187  | No  | NA    | 0  | 1  | Low-quality    | Genome-fragment | 3.15  | 0     |
| S12_vx_k141_65708  full   | 2115  | No  | NA    | 0  | 2  | Not-determined | Genome-fragment | NA    | 0     |
| S14_vx_k141_97175  full   | 4188  | No  | NA    | 0  | 0  | Low-quality    | Genome-fragment | 13.01 | 0     |
| S17_extracted_k141_166770 | 4189  | No  | NA    | 0  | 1  | Low-quality    | Genome-fragment | 7.7   | 0     |
| S17_extracted_k141_18240  | 4191  | No  | NA    | 0  | 4  | Low-quality    | Genome-fragment | 1.13  | 0     |
| S12_extracted_k141_7367   | 4191  | No  | NA    | 0  | 0  | Low-quality    | Genome-fragment | 3.96  | 0     |
| S12_vx_k141_136247  full  | 2251  | No  | NA    | 0  | 0  | Not-determined | Genome-fragment | NA    | 0     |
| S3_vx_k141_9492  full     | 4192  | No  | NA    | 3  | 1  | Low-quality    | Genome-fragment | 2.04  | 0     |
| S12_vx_k141_183653  full  | 4193  | No  | NA    | 0  | 2  | Not-determined | Genome-fragment | NA    | 0     |
| S12_vx_k141_18221  full   | 1065  | No  | NA    | 0  | 0  | Not-determined | Genome-fragment | NA    | 0     |
| S8_extracted_k141_57951   | 4192  | No  | NA    | 0  | 4  | Low-quality    | Genome-fragment | 3.37  | 0     |
| S12_vx_k141_175309  full  | 6165  | No  | NA    | 0  | 3  | Not-determined | Genome-fragment | NA    | 0     |
| S12_vx_k141_136269  full  | 7029  | No  | NA    | 0  | 2  | Not-determined | Genome-fragment | NA    | 0     |
| S12_vx_k141_81141  full   | 2608  | No  | NA    | 0  | 1  | Not-determined | Genome-fragment | NA    | 0     |
| S1_extracted_k141_128184  | 4193  | No  | NA    | 1  | 1  | Low-quality    | Genome-fragment | 5.21  | 0     |
| S12_vx_k141_57957  full   | 4874  | No  | NA    | 0  | 1  | Not-determined | Genome-fragment | NA    | 0     |
| S16_extracted_136664      | 4193  | No  | NA    | 0  | 3  | Low-quality    | Genome-fragment | 2.51  | 0     |
| S12_vx_k141_81165  full   | 3294  | No  | NA    | 0  | 3  | Not-determined | Genome-fragment | NA    | 0     |
| S12_vx_k141_128344  full  | 3241  | No  | NA    | 0  | 0  | Not-determined | Genome-fragment | NA    | 0     |
| S12_vx_k141_81180  full   | 4724  | No  | NA    | 0  | 3  | Not-determined | Genome-fragment | NA    | 0     |
| S12_vx_k141_183719  full  | 3348  | No  | NA    | 0  | 0  | Not-determined | Genome-fragment | NA    | 0     |
| S12_vx_k141_65767  full   | 2802  | No  | NA    | 0  | 2  | Not-determined | Genome-fragment | NA    | 0     |
| S12_vx_k141_2701  full    | 5185  | No  | NA    | 0  | 0  | Not-determined | Genome-fragment | NA    | 0     |
| S12_vx_k141_49267  full   | 1067  | No  | NA    | 0  | 0  | Not-determined | Genome-fragment | NA    | 0     |
| S12_vx_k141_57999  full   | 1717  | No  | NA    | 0  | 2  | Not-determined | Genome-fragment | NA    | 0     |
| S10_vx_54117  full        | 4195  | No  | NA    | 0  | 3  | Low-quality    | Genome-fragment | 15.31 | 0     |
| S12_vx_k141_97508  full   | 6216  | No  | NA    | 0  | 6  | Not-determined | Genome-fragment | NA    | 0     |
| S5_vx_k141_73732  full    | 4196  | No  | NA    | 4  | 0  | Low-quality    | Genome-fragment | 12.22 | 0     |
| S12_vx_k141_183751  full  | 2797  | No  | NA    | 0  | 2  | Not-determined | Genome-fragment | NA    | 0     |
| S12_vx_k141_81239  full   | 1104  | No  | NA    | 0  | 1  | Not-determined | Genome-fragment | NA    | 0     |
| S12_vx_k141_128399  full  | 2148  | No  | NA    | 0  | 1  | Not-determined | Genome-fragment | NA    | 0     |
| S12_vx_k141_128409  full  | 1726  | No  | NA    | 0  | 0  | Not-determined | Genome-fragment | NA    | 0     |
| S12_vx_k141_183752  full  | 14400 | No  | NA    | 7  | 0  | Medium-quality | Genome-fragment | 61.3  | 0     |
| S9_extracted_k141_85492   | 4197  | No  | NA    | 0  | 1  | Low-quality    | Genome-fragment | 3.95  | 0     |
| S7_vx_26210  full         | 4198  | No  | NA    | 0  | 3  | Low-quality    | Genome-fragment | 3.2   | 0     |
| S3_extracted_k141_108642  | 4200  | No  | NA    | 0  | 0  | Low-quality    | Genome-fragment | 2.3   | 0     |
| S14_vx_k141_7083  full    | 4202  | No  | NA    | 0  | 4  | Low-quality    | Genome-fragment | 12.64 | 0     |
| S10_vx_3484  full         | 4202  | No  | NA    | 0  | 0  | Low-quality    | Genome-fragment | 9.81  | 0     |
| S12_vx_k141_812631  full  | 3979  | No  | NA    | 0  | 3  | Not-determined | Genome-fragment | NA    | 0     |
| S12_vx_k141_183796  full  | 2318  | No  | NA    | 0  | 0  | Not-determined | Genome-fragment | NA    | 0     |
| S12_vx_k141_26305  full   | 15381 | No  | NA    | 0  | 4  | Not-determined | Genome-fragment | NA    | 0     |
| S12_vx_29604  full        | 4204  | No  | NA    | 4  | 4  | Low-quality    | Genome-fragment | 3.46  | 0     |
| S1_vx_k141_82197  full    | 4204  | No  | NA    | 0  | 1  | Low-quality    | Genome-fragment | 3.72  | 0     |
| S12_vx_k141_183808  full  | 8792  | No  | NA    | 0  | 5  | Not-determined | Genome-fragment | NA    | 0     |
| S12_vx_k141_97571  full   | 1334  | No  | NA    | 0  | 0  | Not-determined | Genome-fragment | NA    | 0     |
| S12_vx_k141_73008  full   | 1589  | No  | NA    | 0  | 2  | Not-determined | Genome-fragment | NA    | 0     |
| S11_extracted_k141_79683  | 4205  | No  | NA    | 0  | 0  | Low-quality    | Genome-fragment | 5.48  | 0     |
| S12_vx_k141_42320  full   | 3640  | No  | NA    | 0  | 2  | Not-determined | Genome-fragment | NA    | 0     |
| S16_extracted_61646       | 4205  | No  | NA    | 0  | 0  | Low-quality    | Genome-fragment | 10.75 | 0     |
| S8_vx_k141_54804  full    | 4205  | No  | NA    | 0  | 2  | Low-quality    | Genome-fragment | 13.43 | 0     |
| S12_vx_k141_49387  full   | 1976  | No  | NA    | 0  | 0  | Not-determined | Genome-fragment | NA    | 0     |
| S12_vx_k141_136294  full  | 1577  | No  | NA    | 0  | 2  | Not-determined | Genome-fragment | NA    | 0     |
| S5_vx_k141_44158  full    | 4206  | No  | NA    | 3  | 0  | Low-quality    | Genome-fragment | 10.26 | 0     |
| S7_extracted_117429       | 4206  | No  | NA    | 3  | 0  | Low-quality    | Genome-fragment | 12.16 | 0     |
| S12_vx_k141_136412  full  | 2296  | No  | NA    | 0  | 0  | Not-determined | Genome-fragment | NA    | 0     |
| S12_vx_k141_81347  full   | 1385  | No  | NA    | 0  | 0  | Not-determined | Genome-fragment | NA    | 0     |
| S12_vx_k141_183852  full  | 10083 | No  | NA    | 0  | 2  | Not-determined | Genome-fragment | NA    | 0     |
| S16_extracted_94285       | 4207  | No  | NA    | 0  | 3  | Low-quality    | Genome-fragment | 2.09  | 0     |
| S8_vx_k141_193798  full   | 4208  | No  | NA    | 0  | 1  | Low-quality    | Genome-fragment | 5.84  | 0     |
| S12_vx_k141_105197  full  | 1651  | No  | NA    | 0  | 1  | Not-determined | Genome-fragment | NA    | 0     |
| S16_vx_32311  full        | 4211  | No  | NA    | 5  | 0  | Low-quality    | Genome-fragment | 9.5   | 0     |
| S12_vx_k141_142109  full  | 4211  | No  | 2808  | 1  | 1  | Low-quality    | Genome-fragment | 7.01  | 33.32 |
| S12_vx_k141_49413  full   | 2486  | No  | NA    | 0  | 2  | Not-determined | Genome-fragment | NA    | 0     |
| S12_vx_k141_42393  full   | 7909  | No  | NA    | 0  | 3  | Not-determined | Genome-fragment | NA    | 0     |
| S12_vx_k141_58148  full   | 27351 | No  | NA    | 19 | 2  | Medium-quality | Genome-fragment | 68.77 | 0     |
| S12_vx_k141_159780  full  | 1461  | No  | NA    | 0  | 1  | Not-determined | Genome-fragment | NA    | 0     |
| S12_vx_k141_26336  full   | 67092 | Yes | 48897 | 5  | 11 | Medium-quality | Genome-fragment | 80.77 | 27.12 |
| S12_vx_k141_184501  full  | 1390  | No  | NA    | 0  | 0  | Not-determined | Genome-fragment | NA    | 0     |
| S12_vx_k141_2892  full    | 1348  | No  | NA    | 0  | 0  | Not-determined | Genome-fragment | NA    | 0     |
| S8_extracted_k141_49890   | 4211  | No  | NA    | 0  | 0  | Low-quality    | Genome-fragment | 4.83  | 0     |
| S11_vx_k141_32155  full   | 4214  | No  | NA    | 2  | 0  | Low-quality    | Genome-fragment | 12.86 | 0     |
| S12_vx_k141_18456  full   | 1341  | No  | NA    | 0  | 1  | Not-determined | Genome-fragment | NA    | 0     |
| S12_vx_k141_26343  full   | 2837  | No  | NA    | 0  | 2  | Not-determined | Genome-fragment | NA    | 0     |
| S12_vx_k141_151857  full  | 3503  | No  | NA    | 0  | 1  | Not-determined | Genome-fragment | NA    | 0     |
| S1_vx_k141_58341  full    | 4214  | No  | NA    | 1  | 0  | Low-quality    | Genome-fragment | 9.18  | 0     |
| S5_vx_k141_1372  full     | 4215  | No  | NA    | 1  | 1  | Low-quality    | Genome-fragment | 3.84  | 0     |
| S16_vx_116049  full       | 4215  | No  | NA    | 1  | 0  | Low-quality    | Genome-fragment | 10.28 | 0     |
| S10_extracted_20657       | 4215  | No  | NA    | 0  | 2  | Low-quality    | Genome-fragment | 2.94  | 0     |
| S3_extracted_k141_80887   | 4216  | No  | NA    | 0  | 0  | Low-quality    | Genome-fragment | 7.03  | 0     |
| S12_vx_k141_49476  full   | 1317  | No  | NA    | 0  | 0  | Not-determined | Genome-fragment | NA    | 0     |
| S12_vx_k141_151863  full  | 7812  | No  | NA    | 0  | 0  | Not-determined | Genome-fragment | NA    | 0     |
| S12_vx_k141_98684  full   | 1111  | No  | NA    | 0  | 2  | Not-determined | Genome-fragment | NA    | 0     |
| S16_vx_145262  full       | 4216  | No  | NA    | 0  | 1  | Low-quality    | Genome-fragment | 5.15  | 0     |
| S12_vx_k141_136466  full  | 1402  | No  | NA    | 0  | 2  | Not-determined | Genome-fragment | NA    | 0     |
| S12_extracted_44922       | 4217  | No  | NA    | 0  | 5  | Low-quality    | Genome-fragment | 1.56  | 0     |
| S12_vx_k141_33781  full   | 2473  | No  | NA    | 0  | 2  | Not-determined | Genome-fragment | NA    | 0     |
| S12_vx_k141_42411  full   | 6826  | No  | NA    | 0  | 0  | Not-determined | Genome-fragment | NA    | 0     |
| S12_vx_k141_18552  full   | 1100  | No  | NA    | 0  | 1  | Not-determined | Genome-fragment | NA    | 0     |
| S12_vx_k141_2853  full    | 2201  | No  | NA    | 0  | 2  | Not-determined | Genome-fragment | NA    | 0     |
| S12_vx_k141_33793  full   | 5064  | No  | NA    | 0  | 0  | Not-determined | Genome-fragment | NA    | 0     |
| S12_vx_k141_81382  full   | 6477  | No  | NA    | 0  | 4  | Not-determined | Genome-fragment | NA    | 0     |
| S5_vx_k141_60162  full    | 4217  | No  | NA    | 0  | 0  | Low-quality    | Genome-fragment | 11.21 | 0     |
| S16_vx_152565  full       | 4218  | No  | NA    | 3  | 0  | Low-quality    | Genome-fragment | 2.26  | 0     |
| S11_extracted_k141_141947 | 4220  | No  | NA    | 0  | 3  | Low-quality    | Genome-fragment | 0.77  | 0     |
| S12_vx_k141_26417  full   | 2599  | No  | NA    | 0  | 2  | Not-determined | Genome-fragment | NA    | 0     |
| S14_extracted_k141_108818 | 4221  | No  | NA    | 2  | 0  | Low-quality    | Genome-fragment | 6.57  | 0     |
| S7_vx_10149  full         | 4222  | No  | NA    | 0  | 0  | Low-quality    | Genome-fragment | 2.77  | 0     |
| S12_vx_k141_18597  full   | 6055  | No  | NA    | 0  | 2  | Not-determined | Genome-fragment | NA    | 0     |
| S12_vx_k141_112603  full  | 1165  | No  | NA    | 0  | 1  | Not-determined | Genome-fragment | NA    | 0     |
| S7_vx_130086  full        | 4222  | No  | NA    | 3  | 0  | Low-quality    | Genome-fragment | 6.62  | 0     |
| S12_vx_k141_168022  full  | 9295  | No  | NA    | 0  | 5  | Not-determined | Genome-fragment | NA    | 0     |
| S12_vx_k141_97773  full   | 2363  | No  | NA    | 0  | 1  | Not-determined | Genome-fragment | NA    | 0     |
| S12_vx_k141_97781  full   | 3453  | No  | NA    | 0  | 2  | Not-determined | Genome-fragment | NA    | 0     |
| S12_vx_k141_425241  full  | 2530  | No  | NA    | 0  | 1  | Not-determined | Genome-fragment | NA    | 0     |
| S12_vx_k141_159881  full  | 1371  | No  | NA    | 0  | 0  | Not-determined | Genome-fragment | NA    | 0     |
| S5_vx_k141_68008  full    | 4223  | No  | NA    | 0  | 2  | Low-quality    | Genome-fragment | 3.14  | 0     |
| S12_vx_k141_97814  full   | 1322  | No  | NA    | 0  | 2  | Not-determined | Genome-fragment | NA    | 0     |
| S12_vx_k141_89716  full   | 1645  | No  | NA    | 0  | 0  | Not-determined | Genome-fragment | NA    | 0     |
| S12_vx_k141_97827  full   | 2512  | No  | NA    | 0  | 2  |                |                 |       |       |



|                           |        |       |     |    |   |                |                 |    |       |
|---------------------------|--------|-------|-----|----|---|----------------|-----------------|----|-------|
| S12_vx_k141_120910        | [full] | 2594  | NA  | 0  | 2 | Not-determined | Genome-fragment | NA | 0     |
| S12_vx_k141_175635        | [full] | 2107  | NA  | 0  | 0 | Not-determined | Genome-fragment | NA | 0     |
| S5_vx_k141_140866         | [full] | 4232  | NA  | 0  | 1 | Low-quality    | Genome-fragment | NA | 5.94  |
| S5_vx_k141_130609         | [full] | 4234  | NA  | 4  | 0 | Low-quality    | Genome-fragment | NA | 9.3   |
| S12_vx_k141_81527         | [full] | 1713  | NA  | 0  | 2 | Not-determined | Genome-fragment | NA | 0     |
| S17_extracted_k141_92588  | [full] | 4235  | NA  | 0  | 1 | Low-quality    | Genome-fragment | NA | 9.3   |
| S7_vx_132489              | [full] | 4235  | NA  | 5  | 0 | Low-quality    | Genome-fragment | NA | 10.98 |
| S12_vx_k141_168134        | [full] | 1012  | NA  | 0  | 2 | Not-determined | Genome-fragment | NA | 0     |
| S16_extracted_126388      | [full] | 4235  | NA  | 0  | 1 | Low-quality    | Genome-fragment | NA | 3.87  |
| S12_vx_k141_26545         | [full] | 1376  | NA  | 0  | 0 | Not-determined | Genome-fragment | NA | 0     |
| S16_vx_44990              | [full] | 4237  | NA  | 0  | 2 | Low-quality    | Genome-fragment | NA | 0.69  |
| S12_vx_k141_120932        | [full] | 2449  | NA  | 0  | 0 | Not-determined | Genome-fragment | NA | 0     |
| S17_vx_k141_95962         | [full] | 4238  | NA  | 0  | 0 | Low-quality    | Genome-fragment | NA | 2.92  |
| S9_vx_k141_27295          | [full] | 4238  | NA  | 1  | 0 | Low-quality    | Genome-fragment | NA | 6.41  |
| S12_vx_k141_81552         | [full] | 12353 | NA  | 0  | 5 | Not-determined | Genome-fragment | NA | 0     |
| S16_vx_87426              | [full] | 4238  | NA  | 0  | 1 | Low-quality    | Genome-fragment | NA | 2.38  |
| S12_vx_k141_152131        | [full] | 3172  | NA  | 0  | 2 | Not-determined | Genome-fragment | NA | 0     |
| S12_extracted_k141_152289 | [full] | 4239  | NA  | 0  | 0 | Low-quality    | Genome-fragment | NA | 6.31  |
| S12_vx_68023              | [full] | 4241  | NA  | 0  | 0 | Low-quality    | Genome-fragment | NA | 10.26 |
| S3_extracted_k141_33055   | [full] | 4242  | NA  | 4  | 0 | Low-quality    | Genome-fragment | NA | 8.91  |
| S12_vx_k141_112821        | [full] | 1232  | NA  | 0  | 2 | Not-determined | Genome-fragment | NA | 0     |
| S3_vx_k141_114877         | [full] | 4242  | NA  | 0  | 0 | Low-quality    | Genome-fragment | NA | 7.97  |
| S12_extracted_k141_55336  | [full] | 4242  | NA  | 0  | 4 | Low-quality    | Genome-fragment | NA | 1.83  |
| S12_vx_k141_128614        | [full] | 7435  | NA  | 0  | 4 | Not-determined | Genome-fragment | NA | 0     |
| S15_vx_85116              | [full] | 4242  | NA  | 0  | 0 | Low-quality    | Genome-fragment | NA | 4.15  |
| S12_vx_k141_340231        | [full] | 2063  | NA  | 0  | 0 | Not-determined | Genome-fragment | NA | 0     |
| S8_vx_k141_156073         | [full] | 4242  | NA  | 0  | 3 | Low-quality    | Genome-fragment | NA | 5.86  |
| S12_vx_k141_73392         | [full] | 1527  | NA  | 0  | 0 | Not-determined | Genome-fragment | NA | 0     |
| S12_vx_k141_66122         | [full] | 7983  | NA  | 0  | 2 | Not-determined | Genome-fragment | NA | 0     |
| S12_vx_k141_168241        | [full] | 2679  | NA  | 0  | 2 | Not-determined | Genome-fragment | NA | 0     |
| S12_vx_k141_98088         | [full] | 2148  | NA  | 0  | 1 | Not-determined | Genome-fragment | NA | 0     |
| S12_vx_k141_34026         | [full] | 4844  | NA  | 0  | 1 | Not-determined | Genome-fragment | NA | 0     |
| S12_vx_k141_73398         | [full] | 1086  | NA  | 0  | 0 | Not-determined | Genome-fragment | NA | 0     |
| S12_vx_k141_10222         | [full] | 2219  | NA  | 0  | 1 | Not-determined | Genome-fragment | NA | 0     |
| S12_vx_k141_152205        | [full] | 1249  | NA  | 0  | 1 | Not-determined | Genome-fragment | NA | 0     |
| S9_extracted_k141_79999   | [full] | 4243  | NA  | 0  | 1 | Low-quality    | Genome-fragment | NA | 2.58  |
| S3_vx_k141_48131          | [full] | 4244  | NA  | 1  | 0 | Low-quality    | Genome-fragment | NA | 6.32  |
| S12_vx_k141_81648         | [full] | 1966  | NA  | 0  | 1 | Not-determined | Genome-fragment | NA | 0     |
| S12_vx_k141_90023         | [full] | 1911  | NA  | 0  | 2 | Not-determined | Genome-fragment | NA | 0     |
| S12_vx_k141_42828         | [full] | 5618  | NA  | 0  | 1 | Not-determined | Genome-fragment | NA | 0     |
| S12_vx_k141_66173         | [full] | 1837  | NA  | 0  | 3 | Not-determined | Genome-fragment | NA | 0     |
| S12_vx_k141_105607        | [full] | 1459  | NA  | 0  | 0 | Not-determined | Genome-fragment | NA | 0     |
| S12_vx_k141_3290          | [full] | 2108  | NA  | 0  | 1 | Not-determined | Genome-fragment | NA | 0     |
| S5_vx_k141_61131          | [full] | 4244  | NA  | 4  | 0 | Low-quality    | Genome-fragment | NA | 8.58  |
| S16_extracted_97337       | [full] | 4244  | NA  | 0  | 0 | Low-quality    | Genome-fragment | NA | 11.86 |
| S5_vx_k141_127468         | [full] | 4246  | NA  | 0  | 3 | Low-quality    | Genome-fragment | NA | 4.3   |
| S12_vx_k141_112901        | [full] | 7855  | NA  | 0  | 4 | Not-determined | Genome-fragment | NA | 0     |
| S8_vx_k141_146044         | [full] | 4246  | NA  | 0  | 1 | Low-quality    | Genome-fragment | NA | 9.91  |
| S12_vx_k141_136064        | [full] | 5289  | NA  | 0  | 0 | Not-determined | Genome-fragment | NA | 0     |
| S12_vx_k141_42854         | [full] | 1010  | NA  | 0  | 0 | Not-determined | Genome-fragment | NA | 0     |
| S14_vx_k141_75539         | [full] | 4248  | NA  | 4  | 0 | Low-quality    | Genome-fragment | NA | 10.17 |
| S7_vx_2680                | [full] | 4248  | NA  | 0  | 0 | Low-quality    | Genome-fragment | NA | 8.44  |
| S17_vx_k141_90647         | [full] | 4250  | NA  | 0  | 0 | Low-quality    | Genome-fragment | NA | 9.96  |
| S12_vx_k141_168339        | [full] | 14598 | NA  | 0  | 5 | Not-determined | Genome-fragment | NA | 0     |
| S5_vx_k141_28941          | [full] | 4251  | NA  | 1  | 0 | Low-quality    | Genome-fragment | NA | 7.4   |
| S12_vx_k141_127038        | [full] | 1719  | NA  | 0  | 0 | Not-determined | Genome-fragment | NA | 0     |
| S12_vx_k141_160150        | [full] | 2080  | NA  | 0  | 0 | Not-determined | Genome-fragment | NA | 0     |
| S7_extracted_16835        | [full] | 4251  | NA  | 0  | 3 | Low-quality    | Genome-fragment | NA | 1     |
| S12_vx_k141_160166        | [full] | 1557  | NA  | 0  | 0 | Not-determined | Genome-fragment | NA | 0     |
| S17_vx_k141_173348        | [full] | 4253  | NA  | 1  | 0 | Low-quality    | Genome-fragment | NA | 7.72  |
| S12_vx_k141_81729         | [full] | 37456 | NA  | 11 | 1 | High-quality   | High-quality    | NA | 91.57 |
| S10_extracted_67024       | [full] | 4253  | NA  | 0  | 3 | Low-quality    | Genome-fragment | NA | 0.54  |
| S12_vx_k141_168382        | [full] | 1610  | NA  | 0  | 1 | Not-determined | Genome-fragment | NA | 0     |
| S12_vx_k141_3363          | [full] | 2696  | NA  | 0  | 0 | Not-determined | Genome-fragment | NA | 0     |
| S12_vx_k141_58175         | [full] | 22925 | NA  | 14 | 0 | Not-determined | Genome-fragment | NA | 61.01 |
| S12_vx_k141_81739         | [full] | 1648  | NA  | 0  | 0 | Not-determined | Genome-fragment | NA | 0     |
| S12_vx_k141_168391        | [full] | 2443  | NA  | 0  | 1 | Not-determined | Genome-fragment | NA | 0     |
| S13_vx_33406              | [full] | 4254  | NA  | 1  | 0 | Low-quality    | Genome-fragment | NA | 9.84  |
| S12_vx_k141_112991        | [full] | 2825  | NA  | 0  | 1 | Not-determined | Genome-fragment | NA | 0     |
| S12_vx_k141_81761         | [full] | 1134  | NA  | 0  | 0 | Not-determined | Genome-fragment | NA | 0     |
| S1_vx_k141_86066          | [full] | 4254  | NA  | 2  | 0 | Low-quality    | Genome-fragment | NA | 13.04 |
| S12_vx_k141_75528         | [full] | 1619  | NA  | 0  | 0 | Not-determined | Genome-fragment | NA | 0     |
| S14_extracted_k141_71437  | [full] | 4255  | NA  | 3  | 0 | Low-quality    | Genome-fragment | NA | 10.66 |
| S12_vx_k141_66254         | [full] | 9812  | NA  | 0  | 7 | Not-determined | Genome-fragment | NA | 0     |
| S12_vx_k141_50175         | [full] | 2778  | NA  | 0  | 0 | Not-determined | Genome-fragment | NA | 0     |
| S12_vx_k141_113008        | [full] | 1799  | NA  | 0  | 0 | Not-determined | Genome-fragment | NA | 0     |
| S8_extracted_k141_171793  | [full] | 4257  | NA  | 0  | 1 | Low-quality    | Genome-fragment | NA | 2.76  |
| S12_vx_k141_58560         | [full] | 43412 | NA  | 26 | 0 | Medium-quality | Genome-fragment | NA | 71.57 |
| S12_vx_k141_152317        | [full] | 1479  | NA  | 0  | 0 | Not-determined | Genome-fragment | NA | 0     |
| S17_vx_k141_11527         | [full] | 4258  | NA  | 0  | 3 | Low-quality    | Genome-fragment | NA | 3.57  |
| S12_vx_k141_144936        | [full] | 2208  | NA  | 0  | 1 | Not-determined | Genome-fragment | NA | 0     |
| S12_vx_k141_168432        | [full] | 3636  | NA  | 0  | 0 | Not-determined | Genome-fragment | NA | 0     |
| S9_vx_k141_21171          | [full] | 4258  | NA  | 7  | 0 | Low-quality    | Genome-fragment | NA | 9.79  |
| S12_vx_k141_113035        | [full] | 8835  | NA  | 0  | 5 | Not-determined | Genome-fragment | NA | 0     |
| S12_vx_k141_144955        | [full] | 1556  | NA  | 0  | 1 | Not-determined | Genome-fragment | NA | 0     |
| S4_extracted_7153         | [full] | 4258  | NA  | 0  | 2 | Low-quality    | Genome-fragment | NA | 0.37  |
| S12_extracted_k141_36388  | [full] | 4259  | NA  | 0  | 3 | Low-quality    | Genome-fragment | NA | 0.66  |
| S7_extracted_46658        | [full] | 4260  | NA  | 1  | 0 | Low-quality    | Genome-fragment | NA | 10.84 |
| S12_vx_k141_137004        | [full] | 2785  | NA  | 0  | 3 | Not-determined | Genome-fragment | NA | 0     |
| S12_vx_k141_168490        | [full] | 1819  | NA  | 0  | 3 | Not-determined | Genome-fragment | NA | 0     |
| S16_vx_48009              | [full] | 4261  | NA  | 0  | 0 | Low-quality    | Genome-fragment | NA | 10.13 |
| S12_vx_k141_137018        | [full] | 3479  | NA  | 0  | 5 | Not-determined | Genome-fragment | NA | 0     |
| S12_vx_k141_137019        | [full] | 2913  | NA  | 0  | 1 | Not-determined | Genome-fragment | NA | 0     |
| S12_vx_k141_187243        | [full] | 4261  | NA  | 0  | 3 | Low-quality    | Genome-fragment | NA | 3.64  |
| S12_vx_k141_43027         | [full] | 1079  | NA  | 0  | 1 | Not-determined | Genome-fragment | NA | 11.6  |
| S12_vx_k141_126284        | [full] | 4263  | NA  | 2  | 0 | Low-quality    | Genome-fragment | NA | 11.6  |
| S12_vx_k141_105830        | [full] | 1258  | NA  | 0  | 0 | Not-determined | Genome-fragment | NA | 0     |
| S13_extracted_132056      | [full] | 4264  | NA  | 0  | 3 | Low-quality    | Genome-fragment | NA | 5.16  |
| S12_vx_k141_3483          | [full] | 3238  | NA  | 0  | 0 | Not-determined | Genome-fragment | NA | 0     |
| S12_vx_k141_98292         | [full] | 6607  | NA  | 0  | 4 | Not-determined | Genome-fragment | NA | 0     |
| S12_vx_k141_81875         | [full] | 1068  | NA  | 0  | 1 | Not-determined | Genome-fragment | NA | 0     |
| S14_extracted_k141_98939  | [full] | 4264  | NA  | 0  | 0 | Low-quality    | Genome-fragment | NA | 6.13  |
| S12_vx_k141_3498          | [full] | 2763  | NA  | 0  | 0 | Not-determined | Genome-fragment | NA | 0     |
| S7_extracted_33780        | [full] | 4264  | NA  | 0  | 2 | Low-quality    | Genome-fragment | NA | 2.16  |
| S16_extracted_148345      | [full] | 4264  | NA  | 0  | 1 | Low-quality    | Genome-fragment | NA | 5.05  |
| S12_vx_k141_73618         | [full] | 3698  | NA  | 0  | 3 | Not-determined | Genome-fragment | NA | 0     |
| S3_vx_k141_84764          | [full] | 4265  | NA  | 1  | 0 | Low-quality    | Genome-fragment | NA | 6.39  |
| S7_vx_76301               | [full] | 4265  | NA  | 3  | 0 | Low-quality    | Genome-fragment | NA | 11.71 |
| S12_vx_k141_3510          | [full] | 1745  | NA  | 0  | 1 | Not-determined | Genome-fragment | NA | 0     |
| S12_vx_k141_26847         | [full] | 29815 | NA  | 12 | 0 | Medium-quality | Genome-fragment | NA | 50.69 |
| S7_vx_78907               | [full] | 4265  | yes | 2  | 3 | Low-quality    | Genome-fragment | NA | 1.75  |
| S16_extracted_116580      | [full] | 4265  | yes | 2  | 3 | Low-quality    | Genome-fragment | NA | 19.65 |
| S12_vx_k141_128907        | [full] | 1092  | NA  | 0  | 0 | Not-determined | Genome-fragment | NA | 0     |
| S8_extracted_k141_67169   | [full] | 4265  | NA  | 2  | 0 | Low-quality    | Genome-fragment | NA | 7.27  |
| S11_extracted_k141_69923  | [full] | 4267  | NA  | 0  | 1 | Low-quality    | Genome-fragment | NA | 2.24  |
| S12_vx_k141_43099         | [full] | 1199  | NA  | 0  | 0 | Not-determined | Genome-fragment | NA | 0     |
| S12_vx_k141_113123        | [full] | 2501  | NA  | 0  | 1 | Not-determined | Genome-fragment | NA | 0     |
| S12_vx_k141_113121        | [full] | 2364  | NA  | 0  | 0 | Not-determined | Genome-fragment | NA | 0     |
| S12_vx_k141_73872         | [full] | 1407  | NA  | 0  | 0 | Not-determined | Genome-fragment | NA | 0     |
| S7_vx_13949               | [full] | 4267  | NA  | 1  | 0 | Low-quality    | Genome-fragment | NA | 8.99  |
| S12_vx_k141_105898        | [full] | 1964  | NA  | 0  | 2 | Not-determined | Genome-fragment | NA | 0     |
| S12_vx_k141_105901        | [full] | 1317  | NA  | 0  | 0 | Not-determined | Genome-fragment | NA | 0     |
| S13_vx_113046             | [full] | 4269  | NA  | 1  | 0 | Low-quality    | Genome-fragment | NA | 10.13 |
| S12_vx_k141_121271        | [full] | 4269  | NA  | 3  | 0 | Low-quality    | Genome-fragment | NA | 6.12  |
| S7_vx_51283               | [full] | 4270  | NA  | 0  | 0 | Low-quality    | Genome-fragment | NA | 11.41 |
| S11_vx_k141_37922         | [full] | 4271  | NA  | 2  | 0 | Low-quality    | Genome-fragment | NA | 9.47  |
| S12_vx_k141_90351         | [full] | 2383  | NA  | 0  | 0 | Not-determined | Genome-fragment | NA | 0     |
| S12_vx_k141_66441         | [full] | 2661  | NA  | 0  | 2 | Not-determined | Genome-fragment | NA | 0     |
| S12_vx_k141_105933        | [full] | 1430  | NA  | 0  | 1 | Not-determined | Genome-fragment | NA | 0     |
| S12_extracted_k141_39181  | [full] | 4272  | NA  | 3  | 0 | Low-quality    | Genome-fragment | NA | 5.14  |
| S16_extracted_21406       | [full] | 4273  | NA  | 0  | 0 | Low-quality    | Genome-fragment | NA | 2.44  |
| S12_vx_k141_50061         | [full] | 1488  | NA  | 0  | 0 | Not-determined | Genome-fragment | NA | 0     |
| S12_vx_k141_82010         | [full] | 1178  | NA  | 0  | 1 | Not-determined | Genome-fragment | NA | 0     |
| S12_vx_k141_168628        | [full] | 1266  | NA  | 0  | 0 | Not-determined | Genome-fragment | NA | 0     |
| S12_extracted_k141_167473 | [full] | 4273  | NA  | 0  | 1 | Low-quality    | Genome-fragment | NA | 12.17 |
| S13_extracted_84980       | [full] | 4274  | NA  | 0  | 1 | Low-quality    | Genome-fragment | NA | 6.37  |
| S12_vx_k141_10498         | [full] | 5114  | NA  | 0  | 2 | Not-determined | Genome-fragment | NA | 0     |
| S12_vx_k141_137123        | [full] | 1132  | NA  | 0  | 2 | Not-determined | Genome-fragment | NA | 0     |
| S12_vx_k141_50094         | [full] | 3467  | NA  | 0  | 3 | Not-determined | Genome-fragment | NA | 0     |
| S16_extracted_166348      | [full] | 4274  | NA  | 0  | 2 | Low-quality    | Genome-fragment | NA | 7.3   |
| S16_extracted_117690      | [full] | 4275  | NA  | 0  | 3 | Low-quality    | Genome-fragment | NA | 3.85  |
| S12_vx_k141_268141        | [full] | 1388  | NA  | 0  | 0 | Not-determined | Genome-fragment | NA | 0     |
| S12_vx_k141_26921         | [full] | 1448  | NA  | 0  | 0 | Not-determined | Genome-fragment |    |       |



|                           |       |     |      |    |                |                 |                 |       |       |
|---------------------------|-------|-----|------|----|----------------|-----------------|-----------------|-------|-------|
| 55_extracted_k141_81813   | 4285  | Yes | 2901 | 1  | 1              | Low-quality     | Genome-fragment | 3.59  | 32.3  |
| 59_vs_k141_7621 full      | 4286  | No  | NA   | 3  | 0              | Low-quality     | Genome-fragment | 9.47  | 0     |
| 57_extracted_6852         | 4286  | No  | NA   | 0  | 0              | Low-quality     | Genome-fragment | 9.23  | 0     |
| S12_vs_k141_152663 full   | 1461  | No  | NA   | 0  | 0              | Not-determined  | Genome-fragment | NA    | 0     |
| S11_vs_k141_879141 full   | 4287  | No  | NA   | 1  | 0              | Low-quality     | Genome-fragment | 5.31  | 0     |
| S16_vs_k141_37549 full    | 4287  | No  | NA   | 0  | 2              | Low-quality     | Genome-fragment | 1.34  | 0     |
| S17_vs_k141_150099 full   | 4288  | No  | NA   | 0  | 1              | Low-quality     | Genome-fragment | 1.73  | 0     |
| S13_extracted_64503       | 4288  | No  | NA   | 3  | 0              | Low-quality     | Genome-fragment | 6.29  | 0     |
| S12_vs_k141_27075 full    | 1101  | No  | NA   | 1  | Not-determined | Genome-fragment | NA              | 0     | 0     |
| S12_vs_k141_129093 full   | 1766  | No  | NA   | 0  | 0              | Not-determined  | Genome-fragment | NA    | 0     |
| S12_vs_k141_184774 full   | 1779  | No  | NA   | 0  | 2              | Not-determined  | Genome-fragment | NA    | 0     |
| S12_vs_k141_27078 full    | 2519  | No  | NA   | 0  | 0              | Not-determined  | Genome-fragment | NA    | 0     |
| S12_vs_k141_176283 full   | 2669  | No  | NA   | 0  | 1              | Not-determined  | Genome-fragment | NA    | 0     |
| 59_extracted_k141_37154   | 4292  | No  | NA   | 0  | 3              | Low-quality     | Genome-fragment | 14.26 | 0     |
| S11_vs_k141_71849 full    | 4292  | No  | NA   | 1  | 0              | Low-quality     | Genome-fragment | 2.79  | 0     |
| S12_vs_k141_501621 full   | 10071 | No  | NA   | 0  | 2              | Not-determined  | Genome-fragment | NA    | 0     |
| S12_vs_k141_129122 full   | 15212 | No  | NA   | 0  | 3              | Not-determined  | Genome-fragment | NA    | 0     |
| S3_extracted_k141_56735   | 4292  | No  | NA   | 3  | 0              | Low-quality     | Genome-fragment | 12.05 | 0     |
| S12_vs_k141_27123 full    | 1900  | No  | NA   | 0  | 2              | Not-determined  | Genome-fragment | NA    | 0     |
| 55_extracted_k141_35598   | 4292  | No  | NA   | 2  | 0              | Low-quality     | Genome-fragment | 9.17  | 0     |
| S12_vs_k141_145269 full   | 1506  | Yes | 516  | 1  | 1              | Not-determined  | Genome-fragment | NA    | 65.74 |
| S12_vs_k141_27137 full    | 1504  | No  | NA   | 0  | 0              | Not-determined  | Genome-fragment | NA    | 0     |
| S12_vs_k141_113402 full   | 1090  | No  | NA   | 0  | 2              | Not-determined  | Genome-fragment | NA    | 0     |
| S12_extracted_k141_100277 | 4293  | No  | NA   | 0  | 4              | Low-quality     | Genome-fragment | 1.79  | 0     |
| S12_vs_k141_106215 full   | 1297  | No  | NA   | 0  | 0              | Not-determined  | Genome-fragment | NA    | 0     |
| S12_vs_k141_176370 full   | 1543  | No  | NA   | 0  | 1              | Not-determined  | Genome-fragment | NA    | 0     |
| 54_extracted_8310         | 4293  | No  | NA   | 8  | 0              | Low-quality     | Genome-fragment | 14.16 | 0     |
| S17_extracted_k141_134316 | 4294  | No  | NA   | 0  | 0              | Low-quality     | Genome-fragment | 5.14  | 0     |
| S15_extracted_41697       | 4294  | No  | NA   | 0  | 0              | Low-quality     | Genome-fragment | 3.55  | 0     |
| S12_vs_k141_82242 full    | 1363  | No  | NA   | 0  | 1              | Not-determined  | Genome-fragment | NA    | 0     |
| S12_vs_k141_176390 full   | 3636  | No  | NA   | 0  | 1              | Not-determined  | Genome-fragment | NA    | 0     |
| S17_vs_k141_49253 full    | 4295  | Yes | 1628 | 1  | 1              | Low-quality     | Genome-fragment | 3.34  | 62.1  |
| S10_vs_25371 full         | 4295  | No  | NA   | 0  | 1              | Low-quality     | Genome-fragment | 5.8   | 0     |
| S12_vs_k141_145279 full   | 1070  | No  | NA   | 0  | 0              | Not-determined  | Genome-fragment | NA    | 0     |
| S12_vs_k141_60545 full    | 2197  | No  | NA   | 0  | 2              | Not-determined  | Genome-fragment | NA    | 0     |
| 58_extracted_k141_42133   | 4295  | No  | NA   | 0  | 0              | Low-quality     | Genome-fragment | 13.66 | 0     |
| S12_vs_k141_106281 full   | 1614  | No  | NA   | 0  | 1              | Not-determined  | Genome-fragment | NA    | 0     |
| S12_vs_k141_50448 full    | 1564  | No  | NA   | 0  | 0              | Not-determined  | Genome-fragment | NA    | 0     |
| S12_vs_k141_184850 full   | 1278  | No  | NA   | 0  | 0              | Not-determined  | Genome-fragment | NA    | 0     |
| 55_vs_k141_20959 full     | 4296  | No  | NA   | 0  | 0              | Low-quality     | Genome-fragment | 10.23 | 0     |
| 56_vs_k141_43033 full     | 4296  | No  | NA   | 0  | 3              | Low-quality     | Genome-fragment | 2.05  | 0     |
| S12_vs_k141_184860 full   | 1240  | No  | NA   | 0  | 0              | Not-determined  | Genome-fragment | NA    | 0     |
| 55_vs_k141_54061 full     | 4297  | No  | NA   | 0  | 1              | Low-quality     | Genome-fragment | 2.19  | 0     |
| S12_vs_k141_4007 full     | 3890  | No  | NA   | 0  | 1              | Not-determined  | Genome-fragment | NA    | 0     |
| S12_vs_k141_98841 full    | 1217  | No  | NA   | 0  | 1              | Not-determined  | Genome-fragment | NA    | 0     |
| S12_vs_k141_82267 full    | 6816  | No  | NA   | 0  | 0              | Not-determined  | Genome-fragment | NA    | 0     |
| S12_vs_k141_145328 full   | 2321  | No  | NA   | 0  | 1              | Not-determined  | Genome-fragment | NA    | 0     |
| S11_extracted_k141_1851   | 4298  | No  | NA   | 2  | 0              | Low-quality     | Genome-fragment | 1.66  | 0     |
| S3_extracted_k141_84621   | 4298  | No  | NA   | 0  | 0              | Low-quality     | Genome-fragment | 2.81  | 0     |
| S12_vs_k141_4023 full     | 2016  | No  | NA   | 0  | 0              | Not-determined  | Genome-fragment | NA    | 0     |
| S12_vs_k141_90618 full    | 1849  | No  | NA   | 0  | 0              | Not-determined  | Genome-fragment | NA    | 0     |
| 55_vs_k141_35533 full     | 4299  | No  | NA   | 0  | 0              | Low-quality     | Genome-fragment | 5.07  | 0     |
| S12_vs_k141_168807 full   | 2255  | No  | NA   | 0  | 1              | Not-determined  | Genome-fragment | NA    | 0     |
| S17_vs_k141_129567 full   | 4301  | No  | NA   | 0  | 3              | Low-quality     | Genome-fragment | 1.34  | 0     |
| S12_vs_k141_43649 full    | 1940  | No  | NA   | 0  | 0              | Not-determined  | Genome-fragment | NA    | 0     |
| S12_vs_k141_1521861 full  | 2111  | No  | NA   | 0  | 0              | Not-determined  | Genome-fragment | NA    | 0     |
| S10_extracted_13065       | 4301  | No  | NA   | 3  | 0              | Low-quality     | Genome-fragment | 3.01  | 0     |
| S12_vs_k141_66620 full    | 8996  | No  | NA   | 0  | 0              | Not-determined  | Genome-fragment | NA    | 0     |
| S12_vs_k141_184904 full   | 2870  | No  | NA   | 0  | 1              | Not-determined  | Genome-fragment | NA    | 0     |
| S12_vs_k141_50523 full    | 5583  | No  | NA   | 0  | 4              | Not-determined  | Genome-fragment | NA    | 0     |
| 59_extracted_k141_38419   | 4302  | No  | NA   | 3  | 0              | Low-quality     | Genome-fragment | 10.01 | 0     |
| S12_vs_k141_38905 full    | 2123  | No  | NA   | 0  | 1              | Not-determined  | Genome-fragment | NA    | 0     |
| S12_vs_k141_27315 full    | 1155  | No  | NA   | 0  | 0              | Not-determined  | Genome-fragment | NA    | 0     |
| S12_vs_k141_58997 full    | 2795  | No  | NA   | 0  | 0              | Not-determined  | Genome-fragment | NA    | 0     |
| S12_vs_k141_106129 full   | 26070 | No  | NA   | 13 | 2              | Medium-quality  | Genome-fragment | 76.82 | 0     |
| 55_extracted_k141_30928   | 4302  | No  | NA   | 0  | 0              | Low-quality     | Genome-fragment | 3.96  | 0     |
| 58_extracted_k141_128872  | 4302  | No  | NA   | 1  | 0              | Low-quality     | Genome-fragment | 2.64  | 0     |
| S12_vs_k141_82348 full    | 1170  | No  | NA   | 0  | 0              | Not-determined  | Genome-fragment | NA    | 0     |
| S12_vs_k141_119511 full   | 4303  | No  | NA   | 0  | 0              | Low-quality     | Genome-fragment | 10    | 0     |
| S12_vs_k141_82360 full    | 1049  | No  | NA   | 0  | 0              | Not-determined  | Genome-fragment | NA    | 0     |
| S3_extracted_k141_89862   | 4303  | No  | NA   | 1  | 0              | Low-quality     | Genome-fragment | 2.78  | 0     |
| S13_vs_49536 full         | 4305  | No  | NA   | 4  | Low-quality    | Genome-fragment | NA              | 9.95  | 0     |
| S12_vs_k141_27353 full    | 3401  | No  | NA   | 0  | 2              | Not-determined  | Genome-fragment | NA    | 0     |
| S12_vs_k141_129369 full   | 1148  | No  | NA   | 0  | 1              | Not-determined  | Genome-fragment | NA    | 0     |
| S12_vs_k141_176426 full   | 2128  | No  | NA   | 0  | 2              | Not-determined  | Genome-fragment | NA    | 0     |
| 57_vs_94722 full          | 4305  | No  | NA   | 0  | 2              | Low-quality     | Genome-fragment | 8.15  | 0     |
| S12_vs_k141_98946 full    | 2270  | No  | NA   | 0  | 2              | Not-determined  | Genome-fragment | NA    | 0     |
| S12_vs_k141_176428 full   | 5763  | No  | NA   | 0  | 2              | Not-determined  | Genome-fragment | NA    | 0     |
| 53_vs_k141_6738 full      | 4306  | No  | NA   | 0  | 0              | Low-quality     | Genome-fragment | 9.16  | 0     |
| S12_vs_k141_129392 full   | 1407  | No  | NA   | 0  | 0              | Not-determined  | Genome-fragment | NA    | 0     |
| S12_vs_k141_129407 full   | 1143  | No  | NA   | 0  | 0              | Not-determined  | Genome-fragment | NA    | 0     |
| S12_vs_k141_60734 full    | 3543  | No  | NA   | 0  | 0              | Not-determined  | Genome-fragment | NA    | 0     |
| S12_vs_k141_89575 full    | 4306  | No  | NA   | 0  | 3              | Low-quality     | Genome-fragment | 2.25  | 0     |
| S12_vs_k141_121486 full   | 6167  | No  | NA   | 0  | 2              | Not-determined  | Genome-fragment | NA    | 0     |
| S12_vs_k141_82412 full    | 1025  | No  | NA   | 0  | 0              | Not-determined  | Genome-fragment | NA    | 0     |
| 59_vs_k141_8199 full      | 4307  | No  | NA   | 3  | 0              | Low-quality     | Genome-fragment | 9.55  | 0     |
| S14_vs_k141_113987 full   | 4308  | No  | NA   | 0  | 3              | Low-quality     | Genome-fragment | 2.41  | 0     |
| 55_extracted_k141_69851   | 4308  | No  | NA   | 0  | 1              | Low-quality     | Genome-fragment | 8.54  | 0     |
| S10_extracted_2794        | 4308  | No  | NA   | 0  | 1              | Low-quality     | Genome-fragment | 2.21  | 0     |
| S12_vs_k141_50639 full    | 6315  | No  | NA   | 0  | 3              | Not-determined  | Genome-fragment | NA    | 0     |
| S16_extracted_27703       | 4309  | No  | NA   | 3  | 0              | Low-quality     | Genome-fragment | 11.28 | 0     |
| 57_vs_51571 full          | 4310  | No  | NA   | 0  | 1              | Low-quality     | Genome-fragment | 3.84  | 0     |
| S10_vs_25172 full         | 4310  | No  | NA   | 0  | 2              | Low-quality     | Genome-fragment | 2.23  | 0     |
| S17_extracted_k141_174844 | 4311  | No  | NA   | 1  | 3              | Low-quality     | Genome-fragment | 1.27  | 0     |
| S12_vs_k141_185040 full   | 3199  | No  | NA   | 0  | 2              | Not-determined  | Genome-fragment | NA    | 0     |
| S12_vs_k141_90746 full    | 3846  | No  | NA   | 0  | 1              | Not-determined  | Genome-fragment | NA    | 0     |
| S12_vs_k141_32938 full    | 4312  | Yes | 3643 | 3  | 1              | Low-quality     | Genome-fragment | 2.05  | 15.51 |
| 56_vs_k141_50192 full     | 4312  | No  | NA   | 0  | 4              | Low-quality     | Genome-fragment | 9.04  | 0     |
| S3_vs_k141_15095 full     | 4313  | No  | NA   | 0  | 4              | Low-quality     | Genome-fragment | NA    | 0     |
| S12_vs_k141_82464 full    | 1809  | No  | NA   | 0  | 1              | Not-determined  | Genome-fragment | NA    | 0     |
| 55_vs_k141_21318 full     | 4314  | Yes | 3844 | 1  | 1              | Low-quality     | Genome-fragment | 4.36  | 10.89 |
| S12_vs_k141_106429 full   | 1019  | No  | NA   | 0  | 0              | Not-determined  | Genome-fragment | NA    | 0     |
| S12_vs_k141_99023 full    | 2102  | No  | NA   | 0  | 1              | Not-determined  | Genome-fragment | NA    | 0     |
| S12_vs_k141_90793 full    | 2297  | No  | NA   | 0  | 0              | Not-determined  | Genome-fragment | NA    | 0     |
| S12_vs_k141_74280 full    | 4409  | No  | NA   | 0  | 0              | Medium-quality  | Genome-fragment | 53.58 | 0     |
| S12_vs_k141_4094 full     | 1007  | No  | NA   | 0  | 1              | Not-determined  | Genome-fragment | NA    | 0     |
| S12_vs_k141_137711 full   | 3473  | No  | NA   | 0  | 1              | Not-determined  | Genome-fragment | NA    | 0     |
| 57_vs_112960 full         | 4314  | No  | NA   | 2  | 0              | Low-quality     | Genome-fragment | 8.94  | 0     |
| S12_vs_k141_74291 full    | 4113  | No  | NA   | 0  | 2              | Not-determined  | Genome-fragment | NA    | 0     |
| S10_vs_67758 full         | 4314  | No  | NA   | 0  | 2              | Low-quality     | Genome-fragment | 1.35  | 0     |
| 54_extracted_25728        | 4314  | No  | NA   | 3  | 0              | Low-quality     | Genome-fragment | 14.21 | 0     |
| 58_vs_k141_143846 full    | 4314  | No  | NA   | 0  | 0              | Low-quality     | Genome-fragment | 11.03 | 0     |
| S12_vs_k141_27519 full    | 3305  | No  | NA   | 0  | 2              | Not-determined  | Genome-fragment | NA    | 0     |
| S13_vs_53818 full         | 4315  | No  | NA   | 0  | 2              | Low-quality     | Genome-fragment | 12.01 | 0     |
| 56_extracted_k141_26239   | 4315  | No  | NA   | 0  | 0              | Low-quality     | Genome-fragment | 14.19 | 0     |
| S12_vs_k141_121614 full   | 1527  | No  | NA   | 0  | 0              | Not-determined  | Genome-fragment | NA    | 0     |
| S11_vs_k141_19386 full    | 4316  | No  | NA   | 1  | 0              | Low-quality     | Genome-fragment | 10.15 | 0     |
| S12_vs_k141_82471 full    | 1756  | No  | NA   | 0  | 1              | Not-determined  | Genome-fragment | NA    | 0     |
| S12_vs_k141_160894 full   | 1463  | No  | NA   | 0  | 0              | Not-determined  | Genome-fragment | NA    | 0     |
| S12_vs_k141_113662 full   | 2459  | No  | NA   | 0  | 0              | Not-determined  | Genome-fragment | NA    | 0     |
| S12_vs_k141_99077 full    | 2678  | No  | NA   | 0  | 2              | Not-determined  | Genome-fragment | NA    | 0     |
| S12_vs_k141_106218 full   | 1666  | No  | NA   | 0  | 2              | Not-determined  | Genome-fragment | NA    | 0     |
| 57_vs_40189 full          | 4316  | No  | NA   | 5  | 0              | Low-quality     | Genome-fragment | 12.5  | 0     |
| S12_vs_k141_106521 full   | 4943  | No  | NA   | 0  | 3              | Not-determined  | Genome-fragment | NA    | 0     |
| S12_vs_k141_82500 full    | 1383  | No  | NA   | 0  | 1              | Not-determined  | Genome-fragment | NA    | 0     |
| S16_vs_145382 full        | 4316  | No  | NA   | 0  | 0              | Low-quality     | Genome-fragment | 10.91 | 0     |
| S12_vs_k141_11026 full    | 5196  | No  | NA   | 0  | 1              | Not-determined  | Genome-fragment | NA    | 0     |
| S12_vs_k141_110133 full   | 5897  | No  | NA   | 0  | 4              | Not-determined  | Genome-fragment | NA    | 0     |
| S12_vs_k141_19549 full    | 2060  | No  | NA   | 0  | 2              | Not-determined  | Genome-fragment | NA    | 0     |
| 55_extracted_k141_127408  | 4318  | No  | NA   | 0  | 1              | Low-quality     | Genome-fragment | 5.53  | 0     |
| S12_vs_k141_99092 full    | 35261 | No  | NA   | 20 | 1              | High-quality    | High-quality    | 100   | 0     |
| 52_extracted_k141_51960   | 4319  | No  | NA   | 2  | 0              | Low-quality     | Genome-fragment | 11.1  | 0     |
| S12_vs_k141_82534 full    | 2108  | No  | NA   | 0  | 2              | Not-determined  | Genome-fragment | NA    | 0     |
| S12_vs_k141_59238 full    | 19390 | No  | NA   | 0  | 12             | Not-determined  | Genome-fragment | NA    | 0     |
| S12_vs_k141_27606 full    | 6639  | No  | NA   | 0  | 4              | Not-determined  | Genome-fragment | NA    | 0     |
| S16_vs_123087 full        | 4320  | No  | NA   | 0  | 3              | Low-quality     | Genome-fragment | 1.22  | 0     |
| S3_extracted_k141_9339    | 4321  | No  | NA   | 3  | 0              | Low-quality     | Genome-fragment | 11.78 | 0     |
| S12_vs_k141_145672 full   | 5403  | No  | NA   | 0  | 1              | Not-determined  | Genome-fragment | NA    | 0     |
| S12_vs_k141_145681 full   | 1358  | No  | NA   | 0  | 0              | Not-determined  | Genome-fragment | NA    | 0     |
| S12_vs_k141_160991 full   | 15714 | No  | NA   | 0  | 3              | Not-determined  | Genome-fragment | NA    | 0     |
| 54_extracted_18174        | 4321  | No  | NA   | 3  | 0              | Low-quality     | Genome-fragment | 14.17 | 0     |
| S12_vs_k141_27654 full    | 2513  | No  | NA   | 0  | 2              | Not-determined  | Genome-fragment | NA    | 0     |
| S12_vs_k141_74370 full    | 1275  |     |      |    |                |                 |                 |       |       |



|                           |           |        |     |       |      |    |                |                 |    |       |
|---------------------------|-----------|--------|-----|-------|------|----|----------------|-----------------|----|-------|
| S12_vs_k141_74496         | [full]    | 3120   | No  | NA    | 0    | 1  | Not-determined | Genome-fragment | NA | 0     |
| S12_vs_k141_59420         | [full]    | 2333   | No  | NA    | 0    | 0  | Not-determined | Genome-fragment | NA | 0     |
| S5_vs_k141_28804          | [full]    | 4335   | No  | NA    | 0    | 0  | Low-quality    | Genome-fragment | NA | 10.97 |
| S11_vs_k141_31250         | [full]    | 4337   | No  | NA    | 0    | 0  | Low-quality    | Genome-fragment | NA | 3.97  |
| S8_extracted_k141_53777   | [full]    | 4337   | No  | NA    | 6    | 0  | Low-quality    | Genome-fragment | NA | 11.99 |
| S12_vs_k141_35073         | [full]    | 1185   | No  | NA    | 0    | 0  | Not-determined | Genome-fragment | NA | 0     |
| S8_vs_k141_39030          | [full]    | 4337   | No  | NA    | 0    | 4  | Low-quality    | Genome-fragment | NA | 1.82  |
| S3_extracted_k141_81409   | [full]    | 4338   | No  | NA    | 0    | 0  | Low-quality    | Genome-fragment | NA | 9.96  |
| S12_vs_k141_74553         | [full]    | 7395   | No  | NA    | 0    | 4  | Not-determined | Genome-fragment | NA | 0     |
| S12_vs_k141_169276        | [full]    | 7392   | No  | NA    | 0    | 4  | Not-determined | Genome-fragment | NA | 0     |
| S12_vs_k141_185423        | [full]    | 2274   | No  | NA    | 0    | 2  | Not-determined | Genome-fragment | NA | 0     |
| S12_vs_k141_59462         | [full]    | 1930   | No  | NA    | 0    | 0  | Not-determined | Genome-fragment | NA | 0     |
| S8_extracted_k141_49575   | [full]    | 4339   | No  | NA    | 3    | 0  | Low-quality    | Genome-fragment | NA | 10.39 |
| S12_vs_k141_106727        | [full]    | 2397   | No  | NA    | 0    | 0  | Not-determined | Genome-fragment | NA | 0     |
| S12_vs_k141_44101         | [full]    | 3551   | No  | NA    | 0    | 0  | Not-determined | Genome-fragment | NA | 0     |
| S11_vs_k141_90540         | [full]    | 4340   | No  | NA    | 0    | 0  | Low-quality    | Genome-fragment | NA | 6.09  |
| S12_vs_k141_74619         | [full]    | 2147   | No  | NA    | 0    | 1  | Not-determined | Genome-fragment | NA | 0     |
| S12_vs_k141_113857        | [full]    | 2298   | No  | NA    | 0    | 1  | Not-determined | Genome-fragment | NA | 0     |
| S2_vs_k141_89051          | [full]    | 4340   | No  | NA    | 0    | 0  | Low-quality    | Genome-fragment | NA | 10.12 |
| S12_vs_k141_23383         | [full]    | 4341   | No  | NA    | 0    | 0  | Low-quality    | Genome-fragment | NA | 4.08  |
| S12_vs_k141_161328        | [full]    | 2143   | No  | NA    | 0    | 3  | Not-determined | Genome-fragment | NA | 0     |
| S12_vs_k141_67169         | [full]    | 1306   | No  | NA    | 0    | 2  | Not-determined | Genome-fragment | NA | 0     |
| S1_vs_k141_69546          | [full]    | 4342   | No  | NA    | 4    | 0  | Low-quality    | Genome-fragment | NA | 9.21  |
| S12_vs_k141_99281         | [full]    | 1960   | No  | NA    | 0    | 3  | Not-determined | Genome-fragment | NA | 0     |
| S16_extracted_170196      | [full]    | 4343   | No  | NA    | 4    | 0  | Low-quality    | Genome-fragment | NA | 8.99  |
| S16_vs_k13420             | [full]    | 4343   | No  | NA    | 1    | 0  | Low-quality    | Genome-fragment | NA | 8.77  |
| S12_vs_k141_35158         | [full]    | 3546   | No  | NA    | 0    | 1  | Not-determined | Genome-fragment | NA | 0     |
| S12_vs_k141_91239         | [full]    | 1206   | No  | NA    | 0    | 1  | Not-determined | Genome-fragment | NA | 0     |
| S12_vs_k141_59519         | [full]    | 1817   | No  | NA    | 0    | 3  | Not-determined | Genome-fragment | NA | 0     |
| S10_vs_2656               | [full]    | 4343   | No  | NA    | 0    | 0  | Low-quality    | Genome-fragment | NA | 6.81  |
| S12_vs_k141_113928        | [full]    | 1960   | No  | NA    | 0    | 0  | Not-determined | Genome-fragment | NA | 0     |
| S13_extracted_30791       | [full]    | 4345   | No  | NA    | 1    | 1  | Low-quality    | Genome-fragment | NA | 7.79  |
| S12_vs_k141_138125        | [full]    | 1688   | No  | NA    | 0    | 0  | Not-determined | Genome-fragment | NA | 0     |
| S11_extracted_k141_128808 | [full]    | 4345   | No  | NA    | 1    | 0  | Low-quality    | Genome-fragment | NA | 10.51 |
| S10_extracted_9420        | [full]    | 4345   | No  | NA    | 0    | 1  | Low-quality    | Genome-fragment | NA | 3.95  |
| S12_vs_k141_169385        | [full]    | 4096   | No  | NA    | 0    | 0  | Not-determined | Genome-fragment | NA | 0     |
| S8_vs_k141_57381          | [full]    | 4345   | No  | NA    | 3    | 0  | Low-quality    | Genome-fragment | NA | 4.9   |
| S5_vs_k141_54955          | [full]    | 4347   | No  | NA    | 1    | 0  | Low-quality    | Genome-fragment | NA | 8.18  |
| S12_vs_k141_176594        | [full]    | 5017   | No  | NA    | 1    | 1  | Not-determined | Genome-fragment | NA | 0     |
| S12_vs_k141_121792        | [full]    | 1164   | No  | NA    | 0    | 1  | Not-determined | Genome-fragment | NA | 0     |
| S17_vs_k141_169063        | [full]    | 4348   | No  | NA    | 0    | 3  | Low-quality    | Genome-fragment | NA | 2.29  |
| S12_vs_k141_138208        | [full]    | 1685   | No  | NA    | 0    | 0  | Not-determined | Genome-fragment | NA | 0     |
| S12_vs_k141_67197         | [full]    | 3454   | No  | NA    | 0    | 7  | Not-determined | Genome-fragment | NA | 0     |
| S9_vs_k141_83562          | [full]    | 4349   | No  | NA    | 2    | 0  | Low-quality    | Genome-fragment | NA | 12.25 |
| S2_vs_k141_49420          | [full]    | 4349   | No  | NA    | 2    | 0  | Low-quality    | Genome-fragment | NA | 2.66  |
| S12_vs_k141_67205         | [full]    | 1217   | No  | NA    | 0    | 0  | Not-determined | Genome-fragment | NA | 0     |
| S16_vs_134363             | [full]    | 4349   | No  | NA    | 0    | 1  | Low-quality    | Genome-fragment | NA | 4.41  |
| S12_vs_k141_109482        | [full]    | 4349   | No  | NA    | 0    | 0  | Low-quality    | Genome-fragment | NA | 8.56  |
| S12_vs_k141_185638        | [full]    | 2015   | No  | NA    | 0    | 2  | Not-determined | Genome-fragment | NA | 0     |
| S12_vs_k141_153509        | [full]    | 4228   | No  | NA    | 0    | 4  | Not-determined | Genome-fragment | NA | 0     |
| S12_vs_k141_114017        | [full]    | 2701   | No  | NA    | 0    | 1  | Not-determined | Genome-fragment | NA | 0     |
| S12_vs_k141_121808        | [full]    | 5870   | No  | NA    | 0    | 2  | Not-determined | Genome-fragment | NA | 0     |
| S3_vs_k141_13489          | [full]    | 4350   | Yes | 876   | 1    | 3  | Low-quality    | Genome-fragment | NA | 0.41  |
| S16_extracted_78339       | [full]    | 4351   | No  | NA    | 0    | 2  | Low-quality    | Genome-fragment | NA | 5.52  |
| S16_vs_160914             | [102gene] | 4351   | No  | NA    | 1    | 0  | Low-quality    | Genome-fragment | NA | 6.71  |
| S10_extracted_2736        | [full]    | 4352   | No  | NA    | 0    | 0  | Low-quality    | Genome-fragment | NA | 7.31  |
| S11_vs_k141_44591         | [full]    | 4354   | No  | NA    | 1    | 0  | Low-quality    | Genome-fragment | NA | 6.98  |
| S12_vs_k141_62922         | [full]    | 1963   | No  | NA    | 0    | 1  | Not-determined | Genome-fragment | NA | 2.93  |
| S8_extracted_k141_149383  | [full]    | 4354   | No  | NA    | 0    | 1  | Low-quality    | Genome-fragment | NA | 0     |
| S12_vs_k141_35241         | [full]    | 1489   | No  | NA    | 0    | 1  | Not-determined | Genome-fragment | NA | 0     |
| S8_vs_k141_75749          | [full]    | 4355   | No  | NA    | 0    | 0  | Low-quality    | Genome-fragment | NA | 9.22  |
| S8_vs_k141_69431          | [full]    | 4356   | No  | NA    | 0    | 0  | Low-quality    | Genome-fragment | NA | 11.66 |
| S12_vs_k141_74814         | [full]    | 1618   | No  | NA    | 0    | 1  | Not-determined | Genome-fragment | NA | 0     |
| S10_extracted_27308       | [full]    | 4357   | No  | NA    | 4    | 0  | Low-quality    | Genome-fragment | NA | 15.6  |
| S12_vs_k141_176487        | [full]    | 1145   | No  | NA    | 1    | 1  | Not-determined | Genome-fragment | NA | 0     |
| S12_vs_k141_185664        | [full]    | 1973   | No  | NA    | 0    | 0  | Not-determined | Genome-fragment | NA | 0     |
| S13_extracted_128360      | [full]    | 4358   | No  | NA    | 0    | 0  | Low-quality    | Genome-fragment | NA | 4.64  |
| S12_vs_k141_161495        | [full]    | 8199   | No  | NA    | 0    | 7  | Not-determined | Genome-fragment | NA | 0     |
| S12_vs_12786              | [full]    | 4358   | Yes | 927   | 1    | 0  | Low-quality    | Genome-fragment | NA | 0.5   |
| S12_vs_k141_188268        | [full]    | 4358   | No  | NA    | 1    | 0  | Low-quality    | Genome-fragment | NA | 3.5   |
| S12_vs_k141_185689        | [full]    | 2967   | No  | NA    | 0    | 0  | Not-determined | Genome-fragment | NA | 0     |
| S3_vs_k141_66308          | [full]    | 4359   | No  | NA    | 0    | 0  | Low-quality    | Genome-fragment | NA | 11.54 |
| S12_vs_k141_91371         | [full]    | 1106   | No  | NA    | 0    | 0  | Not-determined | Genome-fragment | NA | 0     |
| S12_vs_k141_107027        | [full]    | 1606   | No  | NA    | 0    | 1  | Not-determined | Genome-fragment | NA | 0     |
| S10_vs_52487              | [full]    | 4359   | No  | NA    | 0    | 2  | Low-quality    | Genome-fragment | NA | 5.52  |
| S12_vs_k141_59687         | [full]    | 3915   | No  | NA    | 0    | 4  | Not-determined | Genome-fragment | NA | 0     |
| S12_extracted_k141_47325  | [full]    | 4359   | No  | NA    | 0    | 4  | Low-quality    | Genome-fragment | NA | 2.01  |
| S17_vs_k141_16296         | [full]    | 4360   | No  | NA    | 0    | 1  | Low-quality    | Genome-fragment | NA | 5.66  |
| S12_vs_k141_176722        | [full]    | 14031  | No  | NA    | 0    | 0  | Not-determined | Genome-fragment | NA | 0     |
| S9_vs_k141_69251          | [full]    | 4360   | No  | NA    | 1    | 0  | Low-quality    | Genome-fragment | NA | 12.22 |
| S12_vs_k141_138261        | [full]    | 63040  | No  | NA    | 12   | 2  | High-quality   | High-quality    | NA | 99.25 |
| S12_vs_k141_161554        | [full]    | 1581   | No  | NA    | 0    | 0  | Not-determined | Genome-fragment | NA | 0     |
| S12_vs_k141_121897        | [full]    | 1878   | No  | NA    | 0    | 2  | Not-determined | Genome-fragment | NA | 0     |
| S12_vs_k141_185727        | [full]    | 28635  | No  | NA    | 0    | 17 | Not-determined | Genome-fragment | NA | 0     |
| S12_vs_k141_82989         | [full]    | 2115   | No  | NA    | 0    | 0  | Not-determined | Genome-fragment | NA | 0     |
| S12_vs_k141_185732        | [full]    | 2558   | No  | NA    | 0    | 2  | Not-determined | Genome-fragment | NA | 0     |
| S12_vs_k141_44348         | [full]    | 2929   | No  | NA    | 0    | 0  | Not-determined | Genome-fragment | NA | 0     |
| S12_vs_k141_134181        | [full]    | 2029   | No  | NA    | 0    | 0  | Not-determined | Genome-fragment | NA | 0     |
| S6_vs_k141_12461          | [full]    | 4360   | No  | NA    | 0    | 0  | Low-quality    | Genome-fragment | NA | 2.61  |
| S1_vs_k141_75107          | [full]    | 4361   | No  | NA    | 3    | 0  | Low-quality    | Genome-fragment | NA | 10.61 |
| S12_vs_k141_97051         | [full]    | 4361   | No  | NA    | 0    | 6  | Low-quality    | Genome-fragment | NA | 3.64  |
| S16_vs_6556               | [full]    | 4363   | Yes | 3092  | 1    | 0  | Low-quality    | Genome-fragment | NA | 25.13 |
| S12_vs_k141_114207        | [full]    | 1168   | No  | NA    | 0    | 2  | Not-determined | Genome-fragment | NA | 0     |
| S14_extracted_k141_105970 | [full]    | 4365   | No  | NA    | 1    | 0  | Low-quality    | Genome-fragment | NA | 9.63  |
| S7_extracted_136227       | [full]    | 4365   | No  | NA    | 0    | 0  | Low-quality    | Genome-fragment | NA | 7.33  |
| S16_vs_12939              | [full]    | 4365   | No  | NA    | 2    | 0  | Low-quality    | Genome-fragment | NA | 12.01 |
| S6_extracted_k141_495     | [full]    | 4366   | No  | NA    | 3    | 0  | Low-quality    | Genome-fragment | NA | 9.13  |
| S12_vs_k141_169548        | [full]    | 1403   | No  | NA    | 0    | 0  | Not-determined | Genome-fragment | NA | 1.3   |
| S8_vs_k141_56700          | [full]    | 4366   | No  | NA    | 0    | 1  | Low-quality    | Genome-fragment | NA | 0     |
| S12_vs_k141_74927         | [full]    | 4165   | No  | NA    | 0    | 0  | Not-determined | Genome-fragment | NA | 0     |
| S12_vs_k141_83019         | [full]    | 4035   | No  | NA    | 0    | 2  | Not-determined | Genome-fragment | NA | 0     |
| S12_vs_k141_59815         | [full]    | 2296   | No  | NA    | 0    | 1  | Not-determined | Genome-fragment | NA | 0     |
| S8_vs_k141_91332          | [full]    | 4366   | No  | NA    | 0    | 0  | Low-quality    | Genome-fragment | NA | 2.82  |
| S13_extracted_k141_52137  | [full]    | 4367   | No  | NA    | 1    | 0  | Low-quality    | Genome-fragment | NA | 2.67  |
| S12_vs_k141_12155         | [full]    | 4368   | No  | NA    | 0    | 1  | Low-quality    | Genome-fragment | NA | 3.45  |
| S12_vs_k141_47641         | [full]    | 1744   | No  | NA    | 0    | 1  | Not-determined | Genome-fragment | NA | 0     |
| S12_vs_k141_99560         | [full]    | 5504   | No  | NA    | 0    | 0  | Not-determined | Genome-fragment | NA | 0     |
| S12_vs_k141_17610         | [full]    | 7516   | No  | NA    | 0    | 2  | Not-determined | Genome-fragment | NA | 0     |
| S7_vs_79279               | [full]    | 4368   | No  | NA    | 0    | 0  | Low-quality    | Genome-fragment | NA | 10.11 |
| S12_vs_k141_74958         | [full]    | 6830   | No  | NA    | 0    | 0  | Not-determined | Genome-fragment | NA | 0     |
| S16_vs_5093               | [full]    | 4368   | No  | NA    | 0    | 3  | Low-quality    | Genome-fragment | NA | 2.19  |
| S6_vs_k141_156613         | [full]    | 4368   | No  | NA    | 0    | 2  | Low-quality    | Genome-fragment | NA | 5.17  |
| S12_vs_k141_51284         | [full]    | 2460   | No  | NA    | 0    | 1  | Not-determined | Genome-fragment | NA | 0     |
| S12_vs_k141_35392         | [full]    | 1951   | No  | NA    | 0    | 0  | Not-determined | Genome-fragment | NA | 0     |
| S12_vs_k141_138293        | [full]    | 1370   | No  | NA    | 0    | 0  | Not-determined | Genome-fragment | NA | 0     |
| S13_vs_68275              | [full]    | 4369   | No  | NA    | 0    | 3  | Low-quality    | Genome-fragment | NA | 0.77  |
| S5_extracted_k141_104144  | [full]    | 4369   | No  | NA    | 5    | 0  | Low-quality    | Genome-fragment | NA | 11.72 |
| S7_vs_102763              | [full]    | 4369   | No  | NA    | 2412 | 0  | Low-quality    | Genome-fragment | NA | 2.23  |
| S12_extracted_k141_32678  | [full]    | 4369   | No  | NA    | 0    | 1  | Low-quality    | Genome-fragment | NA | 10.03 |
| S12_vs_k141_121913        | [full]    | 131670 | Yes | 74298 | 11   | 24 | Medium-quality | Genome-fragment | NA | 66.92 |
| S12_vs_k141_153373        | [full]    | 1990   | No  | NA    | 0    | 1  | Not-determined | Genome-fragment | NA | 43.57 |
| S12_vs_k141_91581         | [full]    | 5142   | No  | NA    | 0    | 0  | Not-determined | Genome-fragment | NA | 0     |
| S12_vs_k141_91585         | [full]    | 1367   | No  | NA    | 0    | 1  | Not-determined | Genome-fragment | NA | 0     |
| S12_vs_k141_185883        | [full]    | 2459   | No  | NA    | 0    | 0  | Not-determined | Genome-fragment | NA | 0     |
| S12_vs_k141_176899        | [full]    | 1855   | No  | NA    | 0    | 1  | Not-determined | Genome-fragment | NA | 0     |
| S12_vs_k141_114326        | [full]    | 1338   | No  | NA    | 0    | 0  | Not-determined | Genome-fragment | NA | 0     |
| S8_extracted_k141_125664  | [full]    | 4369   | No  | NA    | 0    | 2  | Low-quality    | Genome-fragment | NA | 5.21  |
| S12_vs_k141_176904        | [full]    | 1595   | No  | NA    | 0    | 1  | Not-determined | Genome-fragment | NA | 0     |
| S4_extracted_17208        | [full]    | 4370   | No  | NA    | 10   | 0  | Low-quality    | Genome-fragment | NA | 14.38 |
| S7_vs_137429              | [full]    | 4371   | No  | NA    | 3    | 1  | Low-quality    | Genome-fragment | NA | 8.16  |
| S10_vs_3836               | [full]    | 4371   | No  | NA    | 1    | 0  | Low-quality    | Genome-fragment | NA | 5.41  |
| S14_vs_k141_47799         | [full]    | 4372   | No  | NA    | 0    | 1  | Low-quality    | Genome-fragment | NA | 2.23  |
| S12_vs_k141_59936         | [full]    | 1514   | No  | NA    | 0    | 0  | Not-determined | Genome-fragment | NA | 0     |
| S3_vs_k141_124183         | [full]    | 4372   | No  | NA    | 0    | 2  | Low-quality    | Genome-fragment | NA | 3.31  |
| S12_vs_k141_161825        | [full]    | 3559   | No  | NA    | 0    | 1  | Not-determined | Genome-fragment | NA | 0     |
| S11_extracted_k141_87390  | [full]    | 4373   | No  | NA    | 1    | 0  | Low-quality    | Genome-fragment | NA |       |



|                           |       |     |    |    |                |                 |                 |       |      |
|---------------------------|-------|-----|----|----|----------------|-----------------|-----------------|-------|------|
| S3_extracted_k141_108490  | 4385  | No  | NA | 0  | 0              | Low-quality     | Genome-fragment | 5.56  | 0    |
| S12_vs_k141_57632 full    | 3684  | No  | NA | 1  | 1              | Not-determined  | Genome-fragment | NA    | 0    |
| S16_vs_112933 full        | 4385  | No  | NA | 2  | 0              | Low-quality     | Genome-fragment | 10.17 | 0    |
| S12_vs_k141_108433 full   | 4388  | No  | NA | 0  | 0              | Low-quality     | Genome-fragment | 11.65 | 0    |
| S16_vs_104148 full        | 4390  | No  | NA | 1  | 0              | Low-quality     | Genome-fragment | 5.11  | 0    |
| S12_vs_k141_130239 full   | 3943  | No  | NA | 0  | 0              | Not-determined  | Genome-fragment | NA    | 0    |
| S7_vs_92596 full          | 4391  | No  | NA | 1  | 0              | Low-quality     | Genome-fragment | 5.71  | 0    |
| S12_vs_k141_4999 full     | 1007  | No  | NA | 0  | 2              | Not-determined  | Genome-fragment | NA    | 0    |
| S12_vs_k141_177142 full   | 2290  | No  | NA | 1  | Not-determined | Genome-fragment | NA              | 2.03  | 0    |
| S10_vs_34205 full         | 4392  | No  | NA | 0  | 2              | Low-quality     | Genome-fragment | 4.04  | 0    |
| S12_vs_k141_20197 full    | 2250  | No  | NA | 0  | 0              | Not-determined  | Genome-fragment | NA    | 0    |
| S12_vs_k141_138718 full   | 1292  | No  | NA | 0  | 0              | Not-determined  | Genome-fragment | NA    | 0    |
| S1_vs_k141_108029 full    | 4393  | No  | NA | 0  | 0              | Low-quality     | Genome-fragment | 11.32 | 0    |
| S7_vs_58186 full          | 4394  | No  | NA | 1  | 0              | Low-quality     | Genome-fragment | 11.28 | 0    |
| S12_extracted_k141_127107 | 4394  | No  | NA | 0  | 0              | Low-quality     | Genome-fragment | 5.91  | 0    |
| S1_vs_k141_129976 full    | 4395  | No  | NA | 0  | 4              | Low-quality     | Genome-fragment | 2.03  | 0    |
| S5_extracted_k141_75820   | 4395  | No  | NA | 2  | 0              | Low-quality     | Genome-fragment | 6.18  | 0    |
| S5_vs_k141_4792 full      | 4395  | No  | NA | 2  | 0              | Low-quality     | Genome-fragment | 11.16 | 0    |
| S11_vs_k141_19227 full    | 4396  | No  | NA | 0  | 0              | Low-quality     | Genome-fragment | 3.05  | 0    |
| S12_vs_k141_35747 full    | 6041  | No  | NA | 0  | 4              | Not-determined  | Genome-fragment | NA    | 0    |
| S11_vs_k141_83284 full    | 4397  | No  | NA | 1  | 0              | Low-quality     | Genome-fragment | 9.72  | 0    |
| S14_vs_k141_105033 full   | 4397  | No  | NA | 0  | 3              | Low-quality     | Genome-fragment | 1.52  | 0    |
| S12_vs_k141_122170 full   | 1078  | No  | NA | 0  | 1              | Not-determined  | Genome-fragment | NA    | 0    |
| S16_vs_132417 full        | 4398  | No  | NA | 0  | 2              | Low-quality     | Genome-fragment | 1.56  | 0    |
| S12_vs_k141_51610 full    | 2490  | No  | NA | 0  | 0              | Not-determined  | Genome-fragment | NA    | 0    |
| S12_vs_k141_177220 full   | 4143  | No  | NA | 0  | 1              | Not-determined  | Genome-fragment | NA    | 0    |
| S13_vs_5992 full          | 4399  | No  | NA | 1  | 0              | Low-quality     | Genome-fragment | 6.99  | 0    |
| S12_vs_k141_110014 full   | 4399  | Yes | NA | 2  | 1              | Low-quality     | Genome-fragment | 2.2   | 30.8 |
| S12_vs_k141_107620 full   | 2239  | No  | NA | 1  | Not-determined | Genome-fragment | NA              | 0     | 0    |
| S12_vs_k141_20267 full    | 3723  | No  | NA | 0  | 1              | Not-determined  | Genome-fragment | NA    | 0    |
| S5_extracted_k141_75695   | 4400  | No  | NA | 4  | 0              | Low-quality     | Genome-fragment | 12.36 | 0    |
| S10_extracted_62320       | 4400  | No  | NA | 1  | Low-quality    | Genome-fragment | NA              | 4.79  | 0    |
| S12_vs_k141_146501 full   | 3665  | No  | NA | 0  | 1              | Not-determined  | Genome-fragment | NA    | 0    |
| S12_vs_k141_67768 full    | 3867  | No  | NA | 0  | 0              | Not-determined  | Genome-fragment | NA    | 0    |
| S12_vs_k141_130335 full   | 1857  | No  | NA | 0  | 1              | Not-determined  | Genome-fragment | NA    | 0    |
| S12_vs_k141_114475 full   | 4400  | No  | NA | 0  | 1              | Low-quality     | Genome-fragment | 0.51  | 0    |
| S12_vs_k141_138819 full   | 7351  | No  | NA | 0  | 9              | Not-determined  | Genome-fragment | NA    | 0    |
| S12_vs_k141_138821 full   | 1998  | No  | NA | 0  | 1              | Not-determined  | Genome-fragment | NA    | 0    |
| S12_vs_k141_59986 full    | 1767  | No  | NA | 0  | 1              | Not-determined  | Genome-fragment | NA    | 0    |
| S11_vs_k141_60435 full    | 4405  | No  | NA | 4  | 0              | Low-quality     | Genome-fragment | 12.05 | 0    |
| S12_vs_k141_44909 full    | 13508 | No  | NA | 0  | 3              | Not-determined  | Genome-fragment | NA    | 0    |
| S12_vs_k141_99975 full    | 1236  | No  | NA | 0  | 1              | Not-determined  | Genome-fragment | NA    | 0    |
| S12_vs_k141_162150 full   | 12636 | No  | NA | 0  | 6              | Not-determined  | Genome-fragment | NA    | 0    |
| S5_vs_k141_83419 full     | 4405  | No  | NA | 1  | 0              | Low-quality     | Genome-fragment | 12.88 | 0    |
| S9_vs_k141_1446 full      | 4406  | No  | NA | 0  | 0              | Low-quality     | Genome-fragment | 6.51  | 0    |
| S9_extracted_k141_29318   | 4407  | No  | NA | 0  | 2              | Low-quality     | Genome-fragment | 7.42  | 0    |
| S10_vs_k141_44952 full    | 3962  | No  | NA | 0  | 0              | Not-determined  | Genome-fragment | NA    | 0    |
| S12_vs_k141_114726 full   | 3925  | No  | NA | 0  | 1              | Not-determined  | Genome-fragment | NA    | 0    |
| S14_vs_k141_19041 full    | 4407  | No  | NA | 0  | 2              | Low-quality     | Genome-fragment | 1.54  | 0    |
| S16_vs_128573 full        | 4407  | Yes | NA | 1  | 1              | Low-quality     | Genome-fragment | 2.3   | 9.26 |
| S12_vs_k141_11833 full    | 1104  | No  | NA | 0  | 0              | Not-determined  | Genome-fragment | NA    | 0    |
| S16_vs_11608 full         | 4408  | No  | NA | 0  | 1              | Low-quality     | Genome-fragment | 7.61  | 0    |
| S12_vs_k141_83481 full    | 1174  | No  | NA | 0  | 0              | Not-determined  | Genome-fragment | NA    | 0    |
| S12_vs_k141_5176 full     | 1054  | No  | NA | 0  | 0              | Not-determined  | Genome-fragment | NA    | 0    |
| S16_vs_33234 full         | 4409  | No  | NA | 0  | 0              | Low-quality     | Genome-fragment | 7.27  | 0    |
| S5_vs_k141_104409 full    | 4410  | No  | NA | 4  | 0              | Low-quality     | Genome-fragment | 11.21 | 0    |
| S12_vs_k141_162230 full   | 1194  | No  | NA | 0  | 0              | Not-determined  | Genome-fragment | NA    | 0    |
| S12_vs_k141_144965 full   | 4350  | No  | NA | 0  | 1              | Not-determined  | Genome-fragment | NA    | 0    |
| S12_vs_k141_754004 full   | 3511  | No  | NA | 0  | 0              | Not-determined  | Genome-fragment | NA    | 0    |
| S12_vs_k141_83489 full    | 2357  | No  | NA | 0  | 1              | Not-determined  | Genome-fragment | NA    | 0    |
| S13_extracted_39506       | 4411  | No  | NA | 0  | 4              | Low-quality     | Genome-fragment | 1.85  | 0    |
| S14_extracted_k141_27732  | 4411  | No  | NA | 0  | 0              | Low-quality     | Genome-fragment | 10.77 | 0    |
| S12_vs_k141_186400 full   | 2796  | No  | NA | 0  | 1              | Not-determined  | Genome-fragment | NA    | 0    |
| S12_vs_k141_44477 full    | 4411  | No  | NA | 3  | 0              | Low-quality     | Genome-fragment | 17.41 | 0    |
| S11_vs_k141_14160 full    | 4412  | No  | NA | 0  | 0              | Low-quality     | Genome-fragment | 11.02 | 0    |
| S12_vs_k141_107716 full   | 26434 | No  | NA | 0  | 13             | Not-determined  | Genome-fragment | NA    | 0    |
| S12_vs_k141_5205 full     | 1684  | No  | NA | 0  | 0              | Not-determined  | Genome-fragment | NA    | 0    |
| S14_vs_k141_6520 full     | 4413  | No  | NA | 5  | 0              | Low-quality     | Genome-fragment | 14.4  | 0    |
| S5_vs_k141_18378 full     | 4414  | No  | NA | 0  | 0              | Low-quality     | Genome-fragment | 11.18 | 0    |
| S8_vs_k141_78199 full     | 4415  | No  | NA | 0  | 0              | Low-quality     | Genome-fragment | 11.96 | 0    |
| S12_vs_k141_75444 full    | 1794  | No  | NA | 0  | 1              | Not-determined  | Genome-fragment | NA    | 0    |
| S14_extracted_k141_100006 | 4416  | No  | NA | 1  | Low-quality    | Genome-fragment | NA              | 1.16  | 0    |
| S8_extracted_k141_117718  | 4416  | No  | NA | 4  | 0              | Low-quality     | Genome-fragment | 10.05 | 0    |
| S12_vs_k141_45041 full    | 5283  | No  | NA | 0  | 2              | Not-determined  | Genome-fragment | NA    | 0    |
| S12_vs_k141_186456 full   | 1166  | No  | NA | 1  | Not-determined | Genome-fragment | NA              | 4.27  | 0    |
| S13_extracted_27160       | 4417  | No  | NA | 5  | 0              | Low-quality     | Genome-fragment | 13.67 | 0    |
| S12_vs_k141_52361 full    | 2253  | No  | NA | 0  | 1              | Not-determined  | Genome-fragment | NA    | 0    |
| S12_vs_k141_20488 full    | 2706  | No  | NA | 0  | 0              | Not-determined  | Genome-fragment | NA    | 0    |
| S12_vs_k141_45053 full    | 7962  | No  | NA | 0  | 4              | Not-determined  | Genome-fragment | NA    | 0    |
| S12_vs_k141_67831 full    | 1668  | No  | NA | 0  | 2              | Not-determined  | Genome-fragment | NA    | 0    |
| S12_vs_k141_130475 full   | 5981  | No  | NA | 0  | 1              | Not-determined  | Genome-fragment | NA    | 0    |
| S12_vs_k141_517501 full   | 1666  | No  | NA | 0  | 1              | Not-determined  | Genome-fragment | NA    | 0    |
| S12_vs_k141_5248 full     | 10905 | No  | NA | 0  | 7              | Not-determined  | Genome-fragment | NA    | 0    |
| S3_extracted_k141_125083  | 4417  | No  | NA | 3  | 0              | Low-quality     | Genome-fragment | 9.61  | 0    |
| S10_extracted_53424       | 4417  | No  | NA | 0  | 3              | Low-quality     | Genome-fragment | 2.14  | 0    |
| S12_vs_k141_139004 full   | 1873  | No  | NA | 0  | 1              | Not-determined  | Genome-fragment | NA    | 0    |
| S12_vs_k141_28661 full    | 27374 | No  | NA | 12 | 0              | Medium-quality  | Genome-fragment | 76.45 | 0    |
| S9_extracted_k141_69728   | 4418  | No  | NA | 0  | 0              | Low-quality     | Genome-fragment | 2.38  | 0    |
| S10_extracted_51876       | 4418  | No  | NA | 0  | 0              | Low-quality     | Genome-fragment | 4.27  | 0    |
| S5_extracted_k141_143796  | 4419  | No  | NA | 1  | 0              | Low-quality     | Genome-fragment | 4.29  | 0    |
| S12_vs_k141_67857 full    | 2961  | No  | NA | 0  | 0              | Not-determined  | Genome-fragment | NA    | 0    |
| S12_vs_k141_130017 full   | 4379  | No  | NA | 0  | 0              | Not-determined  | Genome-fragment | NA    | 0    |
| S12_vs_k141_11934 full    | 1654  | No  | NA | 0  | 1              | Not-determined  | Genome-fragment | NA    | 0    |
| S12_vs_k141_130523 full   | 1850  | No  | NA | 0  | 0              | Not-determined  | Genome-fragment | NA    | 0    |
| S12_vs_k141_75510 full    | 7013  | No  | NA | 0  | 1              | Not-determined  | Genome-fragment | NA    | 0    |
| S12_vs_k141_92135 full    | 1133  | No  | NA | 0  | 0              | Not-determined  | Genome-fragment | NA    | 0    |
| S12_vs_k141_20584 full    | 1033  | No  | NA | 0  | 0              | Not-determined  | Genome-fragment | NA    | 0    |
| S12_vs_k141_5303 full     | 1675  | No  | NA | 0  | 0              | Not-determined  | Genome-fragment | NA    | 0    |
| S6_vs_k141_8634 full      | 4419  | No  | NA | 0  | 1              | Low-quality     | Genome-fragment | 2.08  | 0    |
| S12_vs_k141_146747 full   | 1540  | No  | NA | 0  | 1              | Not-determined  | Genome-fragment | NA    | 0    |
| S12_vs_k141_100196 full   | 2390  | No  | NA | 0  | 2              | Not-determined  | Genome-fragment | NA    | 0    |
| S12_vs_k141_161428 full   | 2650  | No  | NA | 0  | 2              | Not-determined  | Genome-fragment | NA    | 0    |
| S12_vs_k141_170099 full   | 3827  | No  | NA | 0  | 3              | Not-determined  | Genome-fragment | NA    | 0    |
| S12_vs_k141_177444 full   | 1107  | No  | NA | 0  | 0              | Not-determined  | Genome-fragment | NA    | 0    |
| S14_extracted_k141_12573  | 4421  | No  | NA | 0  | 1              | Low-quality     | Genome-fragment | 6.48  | 0    |
| S5_extracted_k141_4465    | 4421  | No  | NA | 0  | 0              | Low-quality     | Genome-fragment | 13.25 | 0    |
| S12_vs_k141_177488 full   | 2011  | No  | NA | 0  | 1              | Not-determined  | Genome-fragment | NA    | 0    |
| S12_vs_k141_162517 full   | 7925  | No  | NA | 0  | 6              | Not-determined  | Genome-fragment | NA    | 0    |
| S10_extracted_4364        | 4421  | No  | NA | 0  | 0              | Low-quality     | Genome-fragment | 6.46  | 0    |
| S12_vs_k141_183618 full   | 4421  | No  | NA | 1  | 0              | Low-quality     | Genome-fragment | 3.23  | 0    |
| S11_extracted_k141_7662   | 4425  | No  | NA | 3  | 0              | Low-quality     | Genome-fragment | 11.67 | 0    |
| S12_vs_k141_154330 full   | 7253  | No  | NA | 0  | 0              | Not-determined  | Genome-fragment | NA    | 0    |
| S12_vs_k141_162547 full   | 1118  | No  | NA | 0  | 1              | Not-determined  | Genome-fragment | NA    | 0    |
| S11_extracted_k141_27795  | 4425  | No  | NA | 0  | 1              | Low-quality     | Genome-fragment | 2.88  | 0    |
| S1_vs_k141_60223 full     | 4426  | No  | NA | 0  | 0              | Low-quality     | Genome-fragment | 11    | 0    |
| S12_vs_k141_92202 full    | 1853  | No  | NA | 0  | 2              | Not-determined  | Genome-fragment | NA    | 0    |
| S5_extracted_k141_127132  | 4426  | No  | NA | 1  | 0              | Low-quality     | Genome-fragment | 11.69 | 0    |
| S12_vs_k141_114961 full   | 6291  | No  | NA | 0  | 0              | Not-determined  | Genome-fragment | NA    | 0    |
| S4_extracted_24680        | 4427  | No  | NA | 0  | 0              | Low-quality     | Genome-fragment | 11.26 | 0    |
| S12_vs_k141_45832 full    | 4427  | No  | NA | 0  | 0              | Low-quality     | Genome-fragment | 7.54  | 0    |
| S12_vs_k141_186610 full   | 7526  | No  | NA | 0  | 0              | Not-determined  | Genome-fragment | NA    | 0    |
| S17_extracted_k141_49816  | 4428  | No  | NA | 0  | 0              | Low-quality     | Genome-fragment | 10.26 | 0    |
| S9_extracted_k141_21796   | 4428  | No  | NA | 0  | 1              | Low-quality     | Genome-fragment | 4.01  | 0    |
| S12_vs_k141_28713 full    | 1298  | No  | NA | 0  | 1              | Not-determined  | Genome-fragment | NA    | 0    |
| S12_vs_k141_186621 full   | 1722  | No  | NA | 0  | 1              | Not-determined  | Genome-fragment | NA    | 0    |
| S11_vs_k141_18219 full    | 4428  | No  | NA | 4  | 0              | Low-quality     | Genome-fragment | 12.27 | 0    |
| S16_extracted_141677      | 4430  | No  | NA | 0  | 3              | Low-quality     | Genome-fragment | 1.74  | 0    |
| S12_vs_k141_154392 full   | 1062  | No  | NA | 0  | 0              | Not-determined  | Genome-fragment | NA    | 0    |
| S12_vs_k141_67976 full    | 3740  | No  | NA | 0  | 4              | Not-determined  | Genome-fragment | NA    | 0    |
| S12_vs_k141_100408 full   | 1098  | No  | NA | 0  | 0              | Not-determined  | Genome-fragment | NA    | 0    |
| S10_extracted_49487       | 4430  | No  | NA | 2  | 0              | Low-quality     | Genome-fragment | 8.72  | 0    |
| S12_vs_k141_130677 full   | 1640  | No  | NA | 0  | 1              | Not-determined  | Genome-fragment | NA    | 0    |
| S12_vs_k141_115009 full   | 2111  | No  | NA | 0  | 2              | Not-determined  | Genome-fragment | NA    | 0    |
| S12_vs_k141_186664 full   | 3748  | No  | NA | 0  | 3              | Not-determined  | Genome-fragment | NA    | 0    |
| S12_vs_k141_107844 full   | 2282  | No  | NA | 0  | 1              | Not-determined  | Genome-fragment | NA    | 0    |
| S17_vs_k141_123814 full   | 4431  | No  | NA | 5  | 0              | Low-quality     | Genome-fragment | 10.98 | 0    |
| S12_vs_k141_68002 full    | 3430  | No  | NA | 0  | 1              | Not-determined  | Genome-fragment | NA    | 0    |
| S12_vs_k141_36111 full    | 2346  | No  | NA | 0  | 0              | Not-determined  | Genome-fragment | NA    | 0    |
| S12_vs_k141_146945 full   | 2191  | No  | NA | 0  | 1              | Not-determined  | Genome-fragment | NA    | 0    |
| S12_vs_k141_28796 full    | 2022  | No  | NA | 0  | 1              | Not-determined  | Genome-fragment | NA    | 0    |
| S14_vs_k141_78337 full    | 4432  | No  | NA | 1  | 0              | Low-quality     | Genome-fragment | 10.66 | 0    |
| S5_extracted_k141_30430   | 4432  | No  | NA | 3  | 0              | Low-quality     | Genome-fragment | 4.09  | 0    |
| S7_vs_82576 full          | 4432  | No  | NA | 3  | 0              |                 |                 |       |      |



|                           |       |    |     |    |                |                 |       |       |
|---------------------------|-------|----|-----|----|----------------|-----------------|-------|-------|
| S11_extracted_k141_73798  | 4444  | NA | 2   | 0  | Low-quality    | Genome-fragment | 10.91 | 0     |
| S12_vx_k141_5721  full    | 1916  | NA | 1   | 0  | Not-determined | Genome-fragment | NA    | 0     |
| S15_extracted_18146       | 4444  | NA | 2   | 0  | Low-quality    | Genome-fragment | 2.36  | 0     |
| S10_vx_151611  full       | 4446  | NA | 5   | 0  | Low-quality    | Genome-fragment | 11.67 | 0     |
| S6_extracted_k141_46369   | 4446  | NA | 3   | 1  | Low-quality    | Genome-fragment | 7.37  | 0     |
| S14_extracted_k141_60279  | 4448  | NA | 5   | 0  | Low-quality    | Genome-fragment | 14.69 | 0     |
| S12_vx_k141_186888  full  | 3677  | NA | 0   | 3  | Not-determined | Genome-fragment | NA    | 0     |
| S12_vx_k141_177789  full  | 1185  | NA | 0   | 1  | Not-determined | Genome-fragment | NA    | 0     |
| S5_extracted_k141_113667  | 4449  | NA | 0   | 0  | Low-quality    | Genome-fragment | 10.77 | 0     |
| S11_vx_k141_33063  full   | 4450  | NA | 0   | 0  | Low-quality    | Genome-fragment | 3.89  | 0     |
| S12_vx_k141_100538  full  | 1203  | NA | 0   | 0  | Not-determined | Genome-fragment | NA    | 0     |
| S5_vx_k141_62608  full    | 4450  | NA | 0   | 2  | Low-quality    | Genome-fragment | 2.33  | 0     |
| S12_vx_k141_36252  full   | 2845  | NA | 0   | 0  | Not-determined | Genome-fragment | NA    | 0     |
| S7_extracted_63415        | 4452  | NA | 1   | 0  | Low-quality    | Genome-fragment | 5.39  | 0     |
| S12_vx_k141_139432  full  | 2193  | NA | 0   | 2  | Not-determined | Genome-fragment | NA    | 0     |
| S7_vx_107211  full        | 4452  | NA | 0   | 0  | Low-quality    | Genome-fragment | 10.33 | 0     |
| S12_vx_k141_147120  full  | 1542  | NA | 0   | 0  | Not-determined | Genome-fragment | NA    | 0     |
| S12_vx_k141_100570  full  | 4891  | NA | 0   | 4  | Not-determined | Genome-fragment | NA    | 0     |
| S10_vx_57643  full        | 4452  | NA | 1   | 1  | Low-quality    | Genome-fragment | 8.66  | 2.4   |
| S12_vx_k141_122829  full  | 2145  | NA | 0   | 2  | Not-determined | Genome-fragment | NA    | 19.68 |
| S17_vx_k141_81041  full   | 4454  | NA | 0   | 4  | Low-quality    | Genome-fragment | 7.94  | 0     |
| S5_vx_k141_25720  full    | 4454  | NA | 4   | 0  | Low-quality    | Genome-fragment | 9.26  | 0     |
| S12_vx_k141_60443  full   | 1937  | NA | 0   | 1  | Not-determined | Genome-fragment | NA    | 0     |
| S12_vx_k141_76045  full   | 2404  | NA | 0   | 2  | Not-determined | Genome-fragment | NA    | 0     |
| S12_vx_k141_108125  full  | 3070  | NA | 0   | 1  | Not-determined | Genome-fragment | NA    | 0     |
| S12_vx_k141_58257  full   | 2201  | NA | 0   | 2  | Not-determined | Genome-fragment | NA    | 0     |
| S12_vx_k141_36268  full   | 3515  | NA | 0   | 2  | Not-determined | Genome-fragment | NA    | 0     |
| S10_vx_85791  full        | 4454  | NA | 0   | 2  | Low-quality    | Genome-fragment | 3.97  | 0     |
| S8_extracted_k141_103518  | 4455  | NA | 0   | 0  | Low-quality    | Genome-fragment | 8.06  | 0     |
| S17_vx_k141_102902  full  | 4458  | NA | 0   | 1  | Low-quality    | Genome-fragment | 1.54  | 0     |
| S17_vx_k141_70561  full   | 4459  | NA | 1   | 1  | Low-quality    | Genome-fragment | 3.21  | 52.16 |
| S11_vx_k141_38847  full   | 4459  | NA | 1   | 3  | Low-quality    | Genome-fragment | 0     | 2.4   |
| S16_vx_90373  full        | 4459  | NA | 789 | 1  | Low-quality    | Genome-fragment | 1.58  | 82.31 |
| S12_vx_k141_130977  full  | 1962  | NA | 0   | 2  | Not-determined | Genome-fragment | NA    | 0     |
| S12_vx_k141_53061  full   | 4460  | NA | 3   | 0  | Low-quality    | Genome-fragment | 11.22 | 0     |
| S12_vx_k141_130988  full  | 4129  | NA | 3   | 0  | Not-determined | Genome-fragment | NA    | 0     |
| S7_vx_24923  full         | 4461  | NA | 1   | 0  | Low-quality    | Genome-fragment | 7.65  | 0     |
| S12_vx_k141_20963  full   | 2185  | NA | 0   | 0  | Not-determined | Genome-fragment | NA    | 0     |
| S12_vx_k141_87025  full   | 1132  | NA | 0   | 0  | Not-determined | Genome-fragment | NA    | 0     |
| S14_extracted_k141_70279  | 4462  | NA | 4   | 0  | Low-quality    | Genome-fragment | 11.66 | 0     |
| S12_vx_k141_29036  full   | 3806  | NA | 0   | 3  | Not-determined | Genome-fragment | NA    | 0     |
| S12_vx_k141_80441  full   | 4463  | NA | 0   | 0  | Low-quality    | Genome-fragment | 11.17 | 0     |
| S12_vx_k141_100677  full  | 5170  | NA | 0   | 8  | Not-determined | Genome-fragment | NA    | 0     |
| S3_vx_k141_114435  full   | 4463  | NA | 0   | 2  | Low-quality    | Genome-fragment | 4.47  | 0     |
| S8_vx_k141_130243  full   | NA    | NA | 0   | 2  | Low-quality    | Genome-fragment | 6.34  | 0     |
| S12_vx_k141_68105  full   | 2606  | NA | 0   | 2  | Not-determined | Genome-fragment | NA    | 0     |
| S12_vx_k141_131038  full  | 1113  | NA | 0   | 1  | Not-determined | Genome-fragment | NA    | 0     |
| S17_extracted_k141_117245 | 4464  | NA | 1   | 0  | Low-quality    | Genome-fragment | 6.33  | 0     |
| S12_vx_k141_5857  full    | 3720  | NA | 14  | 0  | Low-quality    | Genome-fragment | 85.69 | 0     |
| S3_vx_k141_67722  full    | 4464  | NA | 1   | 0  | Low-quality    | Genome-fragment | 2.87  | 0     |
| S5_extracted_k141_103542  | 4464  | NA | 0   | 0  | Low-quality    | Genome-fragment | 2.62  | 0     |
| S12_vx_k141_20598  full   | 2068  | NA | 0   | 0  | Not-determined | Genome-fragment | NA    | 0     |
| S12_vx_k141_100709  full  | 4054  | NA | 0   | 2  | Not-determined | Genome-fragment | NA    | 0     |
| S12_vx_k141_52473  full   | 4879  | NA | 0   | 2  | Not-determined | Genome-fragment | NA    | 0     |
| S12_vx_k141_92553  full   | 1563  | NA | 0   | 0  | Not-determined | Genome-fragment | NA    | 0     |
| S16_extracted_118610      | 4464  | NA | 0   | 0  | Low-quality    | Genome-fragment | 9.91  | 0     |
| S7_vx_61501  full         | 4465  | NA | 3   | 0  | Low-quality    | Genome-fragment | 11.4  | 0     |
| S12_vx_k141_52479  full   | 2546  | NA | 0   | 3  | Not-determined | Genome-fragment | NA    | 0     |
| S12_vx_k141_114611  full  | 4465  | NA | 0   | 0  | Low-quality    | Genome-fragment | 7.62  | 0     |
| S12_vx_k141_76148  full   | 2973  | NA | 0   | 3  | Not-determined | Genome-fragment | NA    | 0     |
| S12_vx_k141_147241  full  | 1824  | NA | 0   | 1  | Not-determined | Genome-fragment | NA    | 0     |
| S12_vx_k141_58951  full   | 2080  | NA | 0   | 0  | Not-determined | Genome-fragment | NA    | 0     |
| S11_vx_k141_20499  full   | 4467  | NA | 1   | 0  | Low-quality    | Genome-fragment | 13.93 | 0     |
| S12_vx_k141_92563  full   | 2987  | NA | 0   | 1  | Not-determined | Genome-fragment | NA    | 0     |
| S12_vx_k141_131083  full  | 1528  | NA | 0   | 1  | Not-determined | Genome-fragment | NA    | 0     |
| S12_vx_k141_122992  full  | 3211  | NA | 0   | 3  | Not-determined | Genome-fragment | NA    | 0     |
| S8_vx_k141_163225  full   | 4467  | NA | 4   | 0  | Low-quality    | Genome-fragment | 10.96 | 0     |
| S14_extracted_k141_24050  | 4470  | NA | 9   | 0  | Low-quality    | Genome-fragment | 6.22  | 0     |
| S8_extracted_k141_11874   | 4470  | NA | 0   | 0  | Low-quality    | Genome-fragment | 1.95  | 0     |
| S12_vx_k141_162744  full  | 9024  | NA | 0   | 4  | Not-determined | Genome-fragment | NA    | 0     |
| S12_vx_k141_147256  full  | 1440  | NA | 0   | 1  | Not-determined | Genome-fragment | NA    | 0     |
| S3_extracted_k141_113302  | 4471  | NA | 0   | 0  | Low-quality    | Genome-fragment | 9.5   | 0     |
| S12_vx_k141_76209  full   | 2054  | NA | 0   | 1  | Not-determined | Genome-fragment | NA    | 0     |
| S12_vx_k141_59541  full   | 3642  | NA | 0   | 2  | Not-determined | Genome-fragment | NA    | 0     |
| S5_extracted_k141_111316  | 4471  | NA | 3   | 0  | Low-quality    | Genome-fragment | 12.32 | 0     |
| S16_extracted_146005      | 4471  | NA | 0   | 1  | Low-quality    | Genome-fragment | 7.57  | 0     |
| S12_vx_k141_108264  full  | 6167  | NA | 0   | 3  | Not-determined | Genome-fragment | NA    | 0     |
| S13_extracted_18624       | 7317  | NA | 0   | 4  | Not-determined | Genome-fragment | NA    | 0     |
| S12_vx_k141_154885  full  | 4472  | NA | 0   | 0  | Low-quality    | Genome-fragment | 7.81  | 0     |
| S12_vx_k141_38887  full   | 2359  | NA | 0   | 0  | Not-determined | Genome-fragment | NA    | 0     |
| S12_extracted_k141_117806 | 4472  | NA | 1   | 0  | Low-quality    | Genome-fragment | 9.85  | 0     |
| S8_vx_k141_140808  full   | 4473  | NA | 0   | 0  | Low-quality    | Genome-fragment | 5.53  | 0     |
| S12_vx_k141_115418  full  | 3997  | NA | 0   | 0  | Not-determined | Genome-fragment | NA    | 0     |
| S12_vx_k141_108308  full  | 4258  | NA | 0   | 1  | Not-determined | Genome-fragment | NA    | 0     |
| S9_vx_k141_60000  full    | 4474  | NA | 0   | 0  | Low-quality    | Genome-fragment | NA    | 0     |
| S12_vx_k141_162817  full  | 2912  | NA | 0   | 0  | Not-determined | Genome-fragment | NA    | 0     |
| S13_vx_56727  full        | 4474  | NA | 1   | 0  | Low-quality    | Genome-fragment | 3.74  | 0     |
| S12_vx_k141_60689  full   | 7218  | NA | 0   | 3  | Not-determined | Genome-fragment | NA    | 0     |
| S12_vx_k141_100876  full  | 1444  | NA | 0   | 0  | Low-quality    | Genome-fragment | NA    | 0     |
| S6_extracted_k141_53811   | 4475  | NA | 4   | 0  | Low-quality    | Genome-fragment | 11.12 | 0     |
| S12_vx_k141_139754  full  | 2960  | NA | 0   | 2  | Not-determined | Genome-fragment | NA    | 0     |
| S1_vx_k141_130551  full   | 4476  | NA | 0   | 3  | Low-quality    | Genome-fragment | 2.59  | 0     |
| S12_vx_k141_170669  full  | 1931  | NA | 0   | 1  | Not-determined | Genome-fragment | NA    | 0     |
| S12_vx_k141_21148  full   | 2121  | NA | 0   | 2  | Not-determined | Genome-fragment | NA    | 0     |
| S12_vx_k141_91329  full   | 4476  | NA | 0   | 0  | Low-quality    | Genome-fragment | 10.45 | 0     |
| S11_vx_k141_65787  full   | 4478  | NA | 3   | 0  | Low-quality    | Genome-fragment | 11.16 | 0     |
| S10_vx_119308  full       | 4478  | NA | 0   | 3  | Low-quality    | Genome-fragment | 0.78  | 0     |
| S12_vx_k141_174001  full  | 4481  | NA | 0   | 4  | Low-quality    | Genome-fragment | 3.59  | 0     |
| S16_extracted_8663        | 4481  | NA | 0   | 0  | Low-quality    | Genome-fragment | 14.13 | 0     |
| S16_vx_96906  full        | 4481  | NA | 0   | 1  | Low-quality    | Genome-fragment | 6.89  | 0     |
| S12_vx_k141_92743  full   | 4693  | NA | 0   | 3  | Not-determined | Genome-fragment | NA    | 8.2   |
| S8_vx_k141_114529  full   | 4481  | NA | 0   | 0  | Low-quality    | Genome-fragment | NA    | 0     |
| S14_vx_k141_89021  full   | 4484  | NA | 4   | 0  | Low-quality    | Genome-fragment | 11.87 | 0     |
| S16_extracted_110440      | 4484  | NA | 3   | 0  | Low-quality    | Genome-fragment | 10.05 | 0     |
| S13_vx_62057  full        | 4487  | NA | 0   | 0  | Low-quality    | Genome-fragment | 7.5   | 0     |
| S17_extracted_k141_20219  | 4488  | NA | 0   | 2  | Low-quality    | Genome-fragment | 0.39  | 0     |
| S12_vx_k141_154981  full  | 4332  | NA | 0   | 0  | Not-determined | Genome-fragment | NA    | 0     |
| S16_vx_134077  full       | NA    | NA | 1   | 0  | Low-quality    | Genome-fragment | 2.02  | 0     |
| S12_extracted_k141_129592 | 4488  | NA | 0   | 0  | Low-quality    | Genome-fragment | 4.31  | 0     |
| S12_vx_k141_131212  full  | 1269  | NA | 0   | 0  | Not-determined | Genome-fragment | NA    | 0     |
| S12_vx_k141_137339  full  | 4488  | NA | 1   | 0  | Low-quality    | Genome-fragment | 2.25  | 0     |
| S14_vx_k141_977151  full  | 4489  | NA | 0   | 0  | Low-quality    | Genome-fragment | 10.43 | 0     |
| S12_vx_k141_84012  full   | 1208  | NA | 0   | 0  | Not-determined | Genome-fragment | NA    | 0     |
| S12_vx_k141_162905  full  | 17615 | NA | 0   | 3  | Not-determined | Genome-fragment | NA    | 9.38  |
| S5_vx_k141_118716  full   | 4489  | NA | 0   | 0  | Low-quality    | Genome-fragment | NA    | 0     |
| S12_vx_k141_108460  full  | 3239  | NA | 0   | 3  | Not-determined | Genome-fragment | NA    | 0     |
| S7_extracted_124441       | 4490  | NA | 0   | 1  | Low-quality    | Genome-fragment | 2.82  | 0     |
| S12_vx_k141_84045  full   | 5070  | NA | 3   | 3  | Not-determined | Genome-fragment | NA    | 3.19  |
| S11_vx_k141_70085  full   | 4491  | NA | 0   | 0  | Low-quality    | Genome-fragment | NA    | 0     |
| S12_vx_k141_6103  full    | 1100  | NA | 0   | 3  | Not-determined | Genome-fragment | NA    | 0     |
| S6_extracted_k141_20825   | 4492  | NA | 2   | 0  | Low-quality    | Genome-fragment | 12.66 | 0     |
| S12_vx_k141_139884  full  | 3488  | NA | 0   | 2  | Not-determined | Genome-fragment | NA    | 0     |
| S12_vx_k141_139886  full  | 5211  | NA | 0   | 1  | Not-determined | Genome-fragment | NA    | 0     |
| S12_vx_k141_21292  full   | 1786  | NA | 0   | 3  | Not-determined | Genome-fragment | NA    | 0     |
| S8_extracted_k141_44527   | 4492  | NA | 0   | 5  | Low-quality    | Genome-fragment | NA    | 14.35 |
| S5_vx_k141_14519  full    | 4493  | NA | 0   | 2  | Low-quality    | Genome-fragment | 2.23  | 0     |
| S16_vx_139807  full       | 4493  | NA | 0   | 3  | Low-quality    | Genome-fragment | 4.43  | 0     |
| S16_extracted_24834       | 4494  | NA | 0   | 1  | Low-quality    | Genome-fragment | 6.73  | 0     |
| S12_vx_k141_187304  full  | 2320  | NA | 0   | 1  | Not-determined | Genome-fragment | NA    | 0     |
| S8_extracted_k141_19748   | 4494  | NA | 0   | 2  | Low-quality    | Genome-fragment | 2.42  | 0     |
| S11_vx_k141_47395  full   | 4496  | NA | 0   | 1  | Low-quality    | Genome-fragment | 11.32 | 0     |
| S16_extracted_117750      | 4496  | NA | 0   | 0  | Low-quality    | Genome-fragment | 7.5   | 0     |
| S6_vx_k141_2755  full     | 4496  | NA | 0   | 0  | Low-quality    | Genome-fragment | 8.15  | 0     |
| S12_vx_k141_187315  full  | 7281  | NA | 0   | 5  | Not-determined | Genome-fragment | NA    | 11.39 |
| S3_vx_k141_89499  full    | 4498  | NA | 0   | 0  | Low-quality    | Genome-fragment | NA    | 0     |
| S12_vx_k141_170850  full  | 24495 | NA | 0   | 15 | Not-determined | Genome-fragment | NA    | 0     |
| S12_vx_k141_147547  full  | 1768  | NA | 0   | 0  | Not-determined | Genome-fragment | NA    | 0     |
| S12_vx_k141_45830  full   | 2008  | NA | 0   | 0  | Not-determined | Genome-fragment | NA    | 0     |
| S9_extracted_k141_39888   | 4500  | NA | 0   | 3  | Low-quality    | Genome-fragment | 2.26  | 0     |
| S12_vx_k141_147549  full  | 5080  | NA | 0   | 0  | Not-determined | Genome-fragment | NA    | 0     |
| S12_vx_k141_68641  full   | 2634  | NA | 0   | 3  | Not-determined | Genome-fragment | NA    | 0     |
| S12_vx_k141_131296  full  | 3596  | NA | 0   | 0  | Not-determined | Genome-fragment | NA    | 0     |
| S3_extracted_k141_33909   | 4501  | NA | 4   | 0  | Low-quality    | Genome-fragment | 11.96 | 0     |
| S13_extracted_45332       | 4502  | NA | 0   | 2  | Low-quality    | Genome-fragment | 3.27  | 0     |
| S12_vx_k141_690251  full  | 1385  | NA | 0   | 1  | Not-determined | Genome-fragment | NA    | 0     |
| S12_vx_k141_131326  full  | 1319  | NA | 0   | 0  | Not-determined | Genome-fragment | NA    | 0     |
| S12_vx_k141_108514  full  | 5024  | NA | 0   | 3  | Not-determined | Genome-fragment | NA    | 0     |
| S12_vx_k141_29277  full   | 3015  | NA | 0   | 2  | Not-determined | Genome-fragment | NA    | 0     |
| S12_vx_k141_52648  full   | 1770  | NA | 0   | 2  | Not-determined | Genome-fragment | NA    | 0     |
| S7_vx_30941  full         | 4503  | NA | 0   | 0  | Low-quality    | Genome-fragment | 10.03 | 0     |



|                           |        |     |    |    |    |                |                 |       |       |
|---------------------------|--------|-----|----|----|----|----------------|-----------------|-------|-------|
| S16_extracted_114064      | 4509   | No  | NA | 0  | 2  | Low-quality    | Genome-fragment | 1.67  | 0     |
| S8_extracted_k141_122896  | 4510   | No  | NA | 0  | 1  | Low-quality    | Genome-fragment | 5.58  | 0     |
| S11_vs_k141_42813  full   | 4512   | No  | NA | 1  | 0  | Low-quality    | Genome-fragment | 12.55 | 0     |
| S11_extracted_k141_97989  | 4512   | No  | NA | 1  | 0  | Low-quality    | Genome-fragment | 9.87  | 0     |
| S12_vs_k141_36694  full   | 2293   | No  | NA | 0  | 0  | Not-determined | Genome-fragment | NA    | 0     |
| S12_vs_k141_123499  full  | 1664   | No  | NA | 0  | 3  | Not-determined | Genome-fragment | NA    | 0     |
| S12_vs_k141_140147  full  | 1689   | No  | NA | 0  | 0  | Not-determined | Genome-fragment | NA    | 0     |
| S12_vs_k141_46037  full   | 1346   | No  | NA | 0  | 0  | Not-determined | Genome-fragment | NA    | 0     |
| S3_extracted_k141_102406  | 4512   | No  | NA | 0  | 0  | Low-quality    | Genome-fragment | 3.16  | 0     |
| S3_vs_k141_2383  full     | 4513   | No  | NA | 1  | 0  | Low-quality    | Genome-fragment | 2.95  | 0     |
| S12_vs_k141_163185  full  | 6111   | No  | NA | 0  | 2  | Not-determined | Genome-fragment | NA    | 0     |
| S12_vs_k141_178570  full  | 2706   | No  | NA | 0  | 2  | Not-determined | Genome-fragment | NA    | 0     |
| S16_extracted_90582       | 4514   | No  | NA | 0  | 1  | Low-quality    | Genome-fragment | 3.57  | 0     |
| S12_vs_k141_46058  full   | 2247   | No  | NA | 0  | 1  | Not-determined | Genome-fragment | NA    | 0     |
| S8_extracted_k141_63951   | 4514   | No  | NA | 5  | 0  | Low-quality    | Genome-fragment | 20.59 | 0     |
| S8_vs_k141_108856  full   | 4514   | No  | NA | 0  | 3  | Low-quality    | Genome-fragment | 2.07  | 0     |
| S12_vs_k141_36755  full   | 1583   | No  | NA | 0  | 2  | Not-determined | Genome-fragment | NA    | 0     |
| S7_vs_67782  full         | 4515   | No  | NA | 3  | 0  | Low-quality    | Genome-fragment | 26.43 | 0     |
| S12_vs_k141_129571  full  | 1744   | No  | NA | 0  | 0  | Not-determined | Genome-fragment | NA    | 0     |
| S1_extracted_k141_88025   | 4516   | No  | NA | 2  | 0  | Low-quality    | Genome-fragment | 16.44 | 0     |
| S5_vs_k141_99024  full    | 4516   | No  | NA | 1  | 0  | Low-quality    | Genome-fragment | 9.42  | 0     |
| S12_vs_k141_12974  full   | 5344   | No  | NA | 0  | 4  | Not-determined | Genome-fragment | NA    | 0     |
| S11_vs_k141_47993  full   | 4519   | No  | NA | 1  | 0  | Low-quality    | Genome-fragment | 7.93  | 0     |
| S12_vs_k141_21534  full   | 4089   | No  | NA | 0  | 1  | Not-determined | Genome-fragment | NA    | 0     |
| S12_vs_k141_6353  full    | 2482   | No  | NA | 0  | 0  | Not-determined | Genome-fragment | NA    | 0     |
| S17_vs_k141_79771  full   | 4522   | No  | NA | 1  | 2  | Low-quality    | Genome-fragment | 2.22  | 0     |
| S12_vs_k141_6357  full    | 1329   | No  | NA | 0  | 0  | Not-determined | Genome-fragment | NA    | 0     |
| S11_vs_k141_14404  full   | 4523   | No  | NA | 2  | 0  | Low-quality    | Genome-fragment | 8.73  | 0     |
| S12_vs_k141_76639  full   | 1659   | No  | NA | 0  | 0  | Not-determined | Genome-fragment | NA    | 0     |
| S12_vs_k141_61142  full   | 5296   | No  | NA | 0  | 1  | Not-determined | Genome-fragment | NA    | 0     |
| S13_extracted_47971       | 4524   | No  | NA | 3  | 0  | Low-quality    | Genome-fragment | 11.2  | 0     |
| S3_vs_k141_106130  full   | 4524   | No  | NA | 4  | 4  | Low-quality    | Genome-fragment | 3.04  | 0     |
| S12_vs_k141_76648  full   | 6476   | No  | NA | 0  | 5  | Not-determined | Genome-fragment | NA    | 0     |
| S12_vs_k141_163295  full  | 4335   | No  | NA | 0  | 0  | Not-determined | Genome-fragment | NA    | 0     |
| S16_vs_39151  full        | 4525   | No  | NA | 0  | 3  | Low-quality    | Genome-fragment | 2.97  | 0     |
| S12_vs_k141_115750  full  | 1685   | No  | NA | 0  | 0  | Not-determined | Genome-fragment | NA    | 0     |
| S12_vs_k141_92969  full   | 3172   | No  | NA | 0  | 3  | Not-determined | Genome-fragment | NA    | 0     |
| S12_vs_k141_163319  full  | 1738   | No  | NA | 0  | 1  | Not-determined | Genome-fragment | NA    | 0     |
| S12_vs_k141_84405  full   | 1007   | No  | NA | 0  | 0  | Not-determined | Genome-fragment | NA    | 0     |
| S17_vs_k141_40728  full   | 4526   | No  | NA | 0  | 0  | Low-quality    | Genome-fragment | 2.49  | 0     |
| S12_vs_k141_140341  full  | 1504   | No  | NA | 0  | 0  | Not-determined | Genome-fragment | NA    | 0     |
| S12_vs_k141_187611  full  | 4484   | No  | NA | 0  | 0  | Not-determined | Genome-fragment | NA    | 0     |
| S12_vs_k141_115780  full  | 1385   | No  | NA | 0  | 0  | Not-determined | Genome-fragment | NA    | 0     |
| S12_vs_k141_178696  full  | 2212   | No  | NA | 0  | 0  | Not-determined | Genome-fragment | NA    | 0     |
| S12_vs_k141_36907  full   | 8898   | No  | NA | 0  | 2  | Not-determined | Genome-fragment | NA    | 0     |
| S7_vs_9171  full          | 4526   | No  | NA | 0  | 0  | Low-quality    | Genome-fragment | 11.78 | 0     |
| S12_vs_k141_187645  full  | 1439   | No  | NA | 0  | 2  | Not-determined | Genome-fragment | NA    | 0     |
| S17_extracted_k141_76815  | 4528   | Yes |    | 2  | 1  | Low-quality    | Genome-fragment | 5.29  | 28.51 |
| S17_extracted_k141_144443 | 4528   | No  |    | 2  | 0  | Low-quality    | Genome-fragment | 7.84  | 0     |
| S17_vs_k141_29249  full   | 4528   | No  | NA | 0  | 3  | Low-quality    | Genome-fragment | 0.77  | 0     |
| S12_vs_k141_215751  full  | 1312   | No  | NA | 0  | 0  | Not-determined | Genome-fragment | NA    | 0     |
| S14_extracted_k141_66022  | 4528   | No  | NA | 0  | 0  | Low-quality    | Genome-fragment | 14.9  | 0     |
| S12_vs_k141_76741  full   | 3490   | No  | NA | 0  | 2  | Not-determined | Genome-fragment | NA    | 0     |
| S12_vs_k141_93050  full   | 1485   | No  | NA | 0  | 0  | Not-determined | Genome-fragment | NA    | 0     |
| S2_vs_k141_20871  full    | 4529   | No  | NA | 0  | 1  | Low-quality    | Genome-fragment | 5.74  | 0     |
| S12_vs_k141_171979  full  | 1756   | No  | NA | 0  | 0  | Not-determined | Genome-fragment | NA    | 0     |
| S12_vs_k141_13170  full   | 2056   | No  | NA | 0  | 0  | Not-determined | Genome-fragment | NA    | 0     |
| S16_extracted_14848       | 4529   | No  | NA | 0  | 0  | Low-quality    | Genome-fragment | 3.67  | 0     |
| S12_vs_k141_84472  full   | 8000   | No  | NA | 0  | 2  | Not-determined | Genome-fragment | NA    | 0     |
| S12_vs_k141_187703  full  | 3198   | No  | NA | 0  | 2  | Not-determined | Genome-fragment | NA    | 0     |
| S9_extracted_k141_1924    | 4530   | No  | NA | 4  | 0  | Low-quality    | Genome-fragment | 14.92 | 0     |
| S12_vs_k141_101547  full  | 2811   | No  | NA | 0  | 1  | Not-determined | Genome-fragment | NA    | 0     |
| S12_vs_k141_69021  full   | 7168   | No  | NA | 0  | 1  | Not-determined | Genome-fragment | NA    | 0     |
| S5_vs_k141_21211  full    | 4530   | No  | NA | 3  | 0  | Low-quality    | Genome-fragment | 11.2  | 0     |
| S7_extracted_11517        | 4530   | No  | NA | 0  | 0  | Low-quality    | Genome-fragment | 3.14  | 0     |
| S12_vs_k141_63278  full   | 1103   | No  | NA | 0  | 0  | Not-determined | Genome-fragment | NA    | 0     |
| S8_vs_k141_98681  full    | 4530   | Yes |    | 1  | 1  | Low-quality    | Genome-fragment | 3.32  | 67.22 |
| S12_vs_k141_123620  full  | 115852 | Yes |    | 13 | 45 | Complete       | High-quality    | 100   | 71.87 |
| S16_extracted_6327        | 4533   | No  | NA | 0  | 0  | Low-quality    | Genome-fragment | 2.99  | 0     |
| S16_extracted_94896       | 4533   | No  | NA | 0  | 0  | Low-quality    | Genome-fragment | 1.13  | 0     |
| S5_vs_k141_15016  full    | 4536   | No  | NA | 0  | 3  | Low-quality    | Genome-fragment | 1.94  | 0     |
| S12_vs_k141_29607  full   | 2071   | No  | NA | 0  | 1  | Not-determined | Genome-fragment | NA    | 0     |
| S12_vs_k141_37046  full   | 5370   | No  | NA | 0  | 0  | Not-determined | Genome-fragment | NA    | 0     |
| S8_vs_k141_89009  full    | 4536   | No  | NA | 1  | 0  | Low-quality    | Genome-fragment | 9.86  | 0     |
| S8_vs_k141_206904  full   | 4536   | No  | NA | 0  | 0  | Low-quality    | Genome-fragment | 9.91  | 0     |
| S12_vs_k141_108921  full  | 3272   | No  | NA | 0  | 0  | Not-determined | Genome-fragment | NA    | 0     |
| S12_vs_k141_46280  full   | 1343   | No  | NA | 0  | 0  | Not-determined | Genome-fragment | NA    | 0     |
| S7_vs_70407  full         | 4539   | Yes |    | 1  | 1  | Low-quality    | Genome-fragment | 6.6   | 38.18 |
| S12_extracted_k141_8481   | 4539   | No  | NA | 0  | 3  | Low-quality    | Genome-fragment | 0.77  | 0     |
| S12_vs_k141_101606  full  | 3470   | No  | NA | 0  | 3  | Not-determined | Genome-fragment | NA    | 0     |
| S17_extracted_k141_140830 | 4542   | No  | NA | 2  | 0  | Low-quality    | Genome-fragment | 7.76  | 0     |
| S9_vs_k141_215778  full   | 4542   | No  | NA | 0  | 0  | Low-quality    | Genome-fragment | 3.01  | 0     |
| S12_vs_k141_46314  full   | 3327   | No  | NA | 0  | 0  | Not-determined | Genome-fragment | NA    | 0     |
| S13_vs_18568  full        | 4542   | No  | NA | 0  | 0  | Low-quality    | Genome-fragment | 9.06  | 0     |
| S14_vs_k141_39894  full   | 4543   | No  | NA | 3  | 0  | Low-quality    | Genome-fragment | 7.62  | 0     |
| S5_vs_k141_145551  full   | 4543   | No  | NA | 0  | 1  | Low-quality    | Genome-fragment | 7.51  | 0     |
| S12_vs_k141_76839  full   | 2909   | No  | NA | 0  | 2  | Not-determined | Genome-fragment | NA    | 0     |
| S12_vs_k141_46321  full   | 1373   | No  | NA | 0  | 0  | Not-determined | Genome-fragment | NA    | 0     |
| S11_vs_k141_30533  full   | 4544   | No  | NA | 0  | 0  | Low-quality    | Genome-fragment | 6.74  | 0     |
| S12_vs_k141_115967  full  | 6903   | No  | NA | 0  | 3  | Not-determined | Genome-fragment | NA    | 0     |
| S12_vs_k141_187796  full  | 3752   | No  | NA | 0  | 2  | Not-determined | Genome-fragment | NA    | 0     |
| S12_vs_k141_84544  full   | 1206   | No  | NA | 0  | 1  | Not-determined | Genome-fragment | NA    | 0     |
| S1_vs_k141_20078  full    | 4545   | No  | NA | 5  | 0  | Low-quality    | Genome-fragment | 10.05 | 0     |
| S12_vs_k141_101649  full  | 2333   | No  | NA | 0  | 0  | Not-determined | Genome-fragment | NA    | 0     |
| S3_extracted_k141_2410    | 4546   | No  | NA | 1  | 0  | Low-quality    | Genome-fragment | 20.83 | 0     |
| S12_vs_k141_84546  full   | 5258   | No  | NA | 0  | 0  | Not-determined | Genome-fragment | NA    | 0     |
| S12_vs_k141_163479  full  | 2351   | No  | NA | 0  | 2  | Not-determined | Genome-fragment | NA    | 0     |
| S12_vs_k141_76879  full   | 2717   | No  | NA | 0  | 0  | Not-determined | Genome-fragment | NA    | 0     |
| S12_vs_k141_101670  full  | 1318   | No  | NA | 0  | 0  | Not-determined | Genome-fragment | NA    | 0     |
| S12_vs_k141_148030  full  | 1129   | No  | NA | 0  | 0  | Not-determined | Genome-fragment | NA    | 0     |
| S8_vs_k141_124470  full   | 4546   | No  | NA | 1  | 0  | Low-quality    | Genome-fragment | 10.41 | 0     |
| S12_vs_k141_155493  full  | 1549   | No  | NA | 0  | 1  | Not-determined | Genome-fragment | NA    | 0     |
| S12_vs_k141_37129  full   | 1859   | No  | NA | 0  | 1  | Not-determined | Genome-fragment | NA    | 0     |
| S12_vs_k141_14110  full   | 4548   | No  | NA | 1  | 0  | Low-quality    | Genome-fragment | 6.55  | 0     |
| S5_vs_k141_36241  full    | 4548   | No  | NA | 0  | 0  | Low-quality    | Genome-fragment | 8.44  | 0     |
| S12_extracted_k141_17889  | 4548   | No  | NA | 0  | 0  | Low-quality    | Genome-fragment | 3.83  | 0     |
| S12_vs_k141_84619  full   | 1116   | No  | NA | 0  | 0  | Not-determined | Genome-fragment | NA    | 0     |
| S12_vs_k141_29853  full   | 2474   | No  | NA | 0  | 2  | Not-determined | Genome-fragment | NA    | 0     |
| S12_vs_k141_6623  full    | 12656  | No  | NA | 1  | 0  | Not-determined | Genome-fragment | NA    | 0     |
| S12_vs_k141_13337  full   | 2876   | No  | NA | 0  | 2  | Not-determined | Genome-fragment | NA    | 0     |
| S11_vs_k141_26376  full   | 4549   | No  | NA | 4  | 0  | Low-quality    | Genome-fragment | 9.68  | 0     |
| S3_extracted_k141_6097    | 4549   | No  | NA | 0  | 0  | Low-quality    | Genome-fragment | 2.97  | 0     |
| S12_vs_k141_131912  full  | 1807   | No  | NA | 0  | 0  | Not-determined | Genome-fragment | NA    | 0     |
| S12_vs_k141_93320  full   | 2184   | No  | NA | 0  | 1  | Not-determined | Genome-fragment | NA    | 0     |
| S12_vs_k141_69185  full   | 1720   | No  | NA | 0  | 1  | Not-determined | Genome-fragment | NA    | 0     |
| S12_vs_k141_172888  full  | 4549   | No  | NA | 5  | 0  | Low-quality    | Genome-fragment | 11.96 | 0     |
| S12_vs_k141_131937  full  | 2429   | No  | NA | 0  | 2  | Not-determined | Genome-fragment | NA    | 0     |
| S12_vs_k141_69199  full   | 1940   | No  | NA | 0  | 2  | Not-determined | Genome-fragment | NA    | 0     |
| S12_vs_k141_53255  full   | 3428   | No  | NA | 0  | 0  | Not-determined | Genome-fragment | NA    | 0     |
| S8_vs_k141_49793  full    | 4553   | No  | NA | 1  | 0  | Low-quality    | Genome-fragment | 10.95 | 0     |
| S5_vs_k141_17534  full    | 4555   | No  | NA | 1  | 0  | Low-quality    | Genome-fragment | 10.75 | 0     |
| S7_vs_70065  full         | 4555   | No  | NA | 0  | 2  | Low-quality    | Genome-fragment | 6.17  | 0     |
| S12_vs_k141_61570  full   | 2215   | No  | NA | 0  | 0  | Not-determined | Genome-fragment | NA    | 0     |
| S12_vs_k141_148112  full  | 2432   | No  | NA | 0  | 1  | Not-determined | Genome-fragment | NA    | 0     |
| S12_extracted_k141_136371 | 4556   | No  | NA | 0  | 3  | Low-quality    | Genome-fragment | NA    | 0     |
| S12_vs_k141_109169  full  | 1048   | No  | NA | 0  | 1  | Not-determined | Genome-fragment | NA    | 0     |
| S14_vs_k141_99756  full   | 4557   | No  | NA | 0  | 0  | Low-quality    | Genome-fragment | 4.97  | 0     |
| S10_vs_122285  full       | 4557   | No  | NA | 0  | 0  | Low-quality    | Genome-fragment | 12.01 | 0     |
| S14_vs_k141_10853  full   | 4558   | No  | NA | 0  | 0  | Low-quality    | Genome-fragment | 4.77  | 0     |
| S12_vs_k141_123892  full  | 1937   | No  | NA | 0  | 1  | Not-determined | Genome-fragment | NA    | 0     |
| S12_vs_k141_21723  full   | 10845  | No  | NA | 0  | 6  | Not-determined | Genome-fragment | NA    | 0     |
| S16_vs_33040  full        | 4558   | No  | NA | 0  | 2  | Low-quality    | Genome-fragment | 5.94  | 0     |
| S12_vs_k141_46452  full   | 3757   | No  | NA | 0  | 3  | Not-determined | Genome-fragment | NA    | 0     |
| S12_vs_k141_93357  full   | 40010  | No  | NA | 24 | 0  | Medium-quality | Genome-fragment | 80.94 | 0     |
| S12_vs_k141_140679  full  | 6155   | No  | NA | 0  | 4  | Not-determined | Genome-fragment | NA    | 0     |
| S6_vs_k141_17533  full    | 4559   | No  | NA | 1  | 0  | Low-quality    | Genome-fragment | 11.19 | 0     |
| S12_vs_k141_21730  full   | 1358   | No  | NA | 0  | 1  | Not-determined | Genome-fragment | NA    | 0     |
| S8_vs_k141_147893  full   | 4561   | No  | NA | 0  | 1  | Low-quality    | Genome-fragment | 3.25  | 0     |
| S12_vs_k141_61602  full   | 7718   | No  | NA | 0  | 3  | Not-determined | Genome-fragment | NA    | 0     |
| S12_vs_k141_148141  full  | 2695   | No  | NA | 0  | 3  | Not-determined | Genome-fragment | NA    | 0     |
| S12_extracted_k141_24424  | 4562   | No  | NA | 0  | 1  | Low-quality    | Genome-fragment | 8.97  | 0     |
| S8_vs_k141_142489  full   | 4562   | No  | NA | 3  | 0  | Low-quality    | Genome-fragment | 10.25 | 0     |
| S7_vs_15549  full         | 4563   | No  | NA | 0  | 1  | Low-quality    | Genome          |       |       |



|                           |        |       |     |      |    |   |                |                 |    |       |       |
|---------------------------|--------|-------|-----|------|----|---|----------------|-----------------|----|-------|-------|
| S12_vx_k141_466541        | [full] | 3797  | No  | NA   | 0  | 0 | Not-determined | Genome-fragment | NA | 0     | 0     |
| S12_vx_k141_1321531       | [full] | 4367  | No  | NA   | 4  | 2 | Not-determined | Genome-fragment | NA | 0     | 0     |
| S3_extracted_k141_121136  |        | 4578  | No  | NA   | 3  | 1 | Low-quality    | Genome-fragment | NA | 5.84  | 0     |
| S16_extracted_94186       |        | 4578  | Yes | 2715 | 1  | 1 | Low-quality    | Genome-fragment | NA | 3.81  | 40.69 |
| S12_vx_k141_301931        | [full] | 3117  | No  | NA   | 0  | 1 | Not-determined | Genome-fragment | NA | 0     | 0     |
| S12_vx_k141_1557431       | [full] | 3206  | No  | NA   | 0  | 1 | Not-determined | Genome-fragment | NA | 0     | 0     |
| S12_vx_k141_935471        | [full] | 1923  | No  | NA   | 0  | 1 | Not-determined | Genome-fragment | NA | 0     | 0     |
| S12_vx_k141_1639081       | [full] | 3579  | No  | NA   | 0  | 1 | Not-determined | Genome-fragment | NA | 0     | 0     |
| S12_vx_k141_1408541       | [full] | 1553  | No  | NA   | 0  | 0 | Not-determined | Genome-fragment | NA | 0     | 0     |
| S8_vx_k141_1430081        | [full] | 4582  | No  | NA   | 1  | 0 | Low-quality    | Genome-fragment | NA | 1.28  | 0     |
| S12_vx_k141_1715451       | [full] | 1680  | No  | NA   | 0  | 0 | Not-determined | Genome-fragment | NA | 0     | 0     |
| S12_vx_k141_1240881       | [full] | 2716  | No  | NA   | 0  | 0 | Not-determined | Genome-fragment | NA | 0     | 0     |
| S7_vx_1023861             | [full] | 4583  | No  | NA   | 0  | 4 | Low-quality    | Genome-fragment | NA | 1.84  | 0     |
| S12_vx_k141_1322041       | [full] | 1402  | No  | NA   | 0  | 0 | Not-determined | Genome-fragment | NA | 0     | 0     |
| S12_vx_k141_1557841       | [full] | 1177  | No  | NA   | 0  | 1 | Not-determined | Genome-fragment | NA | 0     | 0     |
| S12_vx_k141_374791        | [full] | 1786  | No  | NA   | 0  | 1 | Not-determined | Genome-fragment | NA | 0     | 0     |
| S12_vx_k141_466951        | [full] | 1336  | No  | NA   | 0  | 2 | Not-determined | Genome-fragment | NA | 0     | 0     |
| S12_vx_k141_467021        | [full] | 1150  | No  | NA   | 0  | 0 | Not-determined | Genome-fragment | NA | 0     | 0     |
| S17_vx_k141_122401        | [full] | 4584  | No  | NA   | 0  | 1 | Low-quality    | Genome-fragment | NA | 4.88  | 0     |
| S14_vx_k141_261941        | [full] | 4585  | No  | NA   | 0  | 0 | Low-quality    | Genome-fragment | NA | 12.81 | 0     |
| S5_extracted_k141_92798   |        | 4585  | No  | NA   | 7  | 0 | Low-quality    | Genome-fragment | NA | 15.13 | 0     |
| S17_extracted_k141_165852 |        | 4586  | No  | NA   | 0  | 4 | Low-quality    | Genome-fragment | NA | 3.45  | 0     |
| S12_vx_k141_936141        | [full] | 1019  | No  | NA   | 0  | 2 | Not-determined | Genome-fragment | NA | 0     | 0     |
| S17_extracted_k141_42369  |        | 4586  | No  | NA   | 5  | 0 | Low-quality    | Genome-fragment | NA | 7.53  | 0     |
| S14_vx_k141_843601        | [full] | 4587  | Yes | 1608 | 1  | 4 | Low-quality    | Genome-fragment | NA | 0.65  | 64.94 |
| S1_extracted_k141_45980   |        | 4587  | No  | NA   | 2  | 0 | Low-quality    | Genome-fragment | NA | 7.85  | 0     |
| S3_vx_k141_1183451        |        | 4588  | No  | NA   | 2  | 0 | Low-quality    | Genome-fragment | NA | 3.08  | 0     |
| S12_vx_k141_850191        | [full] | 6861  | No  | NA   | 0  | 3 | Not-determined | Genome-fragment | NA | 0     | 0     |
| S7_extracted_249          |        | 4589  | No  | NA   | 0  | 0 | Low-quality    | Genome-fragment | NA | 7.67  | 0     |
| S10_extracted_27396       |        | 4589  | No  | NA   | 0  | 3 | Low-quality    | Genome-fragment | NA | 4.89  | 0     |
| S1_vx_k141_565891         | [full] | 4590  | No  | NA   | 0  | 0 | Low-quality    | Genome-fragment | NA | 11.71 | 0     |
| S12_vx_k141_536511        | [full] | 1057  | No  | NA   | 0  | 2 | Not-determined | Genome-fragment | NA | 0     | 0     |
| S12_vx_k141_1094631       | [full] | 1370  | No  | NA   | 0  | 0 | Not-determined | Genome-fragment | NA | 0     | 0     |
| S17_extracted_k141_105551 |        | 4591  | No  | NA   | 0  | 0 | Low-quality    | Genome-fragment | NA | 4.51  | 0     |
| S12_vx_k141_1161951       | [full] | 1020  | No  | NA   | 0  | 0 | Not-determined | Genome-fragment | NA | 0     | 0     |
| S12_vx_k141_1791481       | [full] | 2276  | No  | NA   | 0  | 0 | Not-determined | Genome-fragment | NA | 0     | 0     |
| S12_vx_k141_1163951       | [full] | 1620  | No  | NA   | 0  | 1 | Not-determined | Genome-fragment | NA | 0     | 0     |
| S12_vx_k141_536811        | [full] | 2080  | No  | NA   | 0  | 0 | Not-determined | Genome-fragment | NA | 0     | 0     |
| S12_vx_k141_1791551       | [full] | 3188  | No  | NA   | 0  | 2 | Not-determined | Genome-fragment | NA | 0     | 0     |
| S12_vx_k141_850771        | [full] | 3013  | No  | NA   | 0  | 2 | Not-determined | Genome-fragment | NA | 0     | 0     |
| S14_vx_k141_362981        | [full] | 4591  | No  | NA   | 0  | 1 | Low-quality    | Genome-fragment | NA | 9.99  | 0     |
| S12_vx_k141_1881221       | [full] | 7034  | No  | NA   | 0  | 1 | Not-determined | Genome-fragment | NA | 0     | 0     |
| S12_vx_k141_220161        | [full] | 2590  | No  | NA   | 0  | 2 | Not-determined | Genome-fragment | NA | 0     | 0     |
| S12_vx_k141_1484501       | [full] | 3234  | No  | NA   | 0  | 0 | Not-determined | Genome-fragment | NA | 0     | 0     |
| S12_vx_k141_1558571       | [full] | 2585  | No  | NA   | 0  | 4 | Not-determined | Genome-fragment | NA | 0     | 0     |
| S16_extracted_65041       |        | 4591  | No  | NA   | 0  | 0 | Low-quality    | Genome-fragment | NA | 3.7   | 0     |
| S5_extracted_k141_30182   |        | 4592  | No  | NA   | 0  | 0 | Low-quality    | Genome-fragment | NA | 2.26  | 0     |
| S8_vx_k141_694821         | [full] | 4593  | No  | NA   | 2  | 0 | Low-quality    | Genome-fragment | NA | 10.91 | 0     |
| S12_vx_k141_305141        | [full] | 2829  | No  | NA   | 0  | 1 | Not-determined | Genome-fragment | NA | 0     | 0     |
| S12_vx_k141_303221        | [full] | 1445  | No  | NA   | 0  | 0 | Not-determined | Genome-fragment | NA | 0     | 0     |
| S7_extracted_7741         |        | 4594  | No  | NA   | 0  | 2 | Low-quality    | Genome-fragment | NA | 2.45  | 0     |
| S10_extracted_34536       |        | 4595  | No  | NA   | 0  | 0 | Low-quality    | Genome-fragment | NA | 7.62  | 0     |
| S12_vx_k141_1020901       | [full] | 1020  | No  | NA   | 0  | 1 | Not-determined | Genome-fragment | NA | 0     | 0     |
| S3_vx_k141_507561         | [full] | 4597  | No  | NA   | 2  | 0 | Low-quality    | Genome-fragment | NA | 10.3  | 0     |
| S12_vx_k141_962511        | [full] | 4597  | No  | NA   | 0  | 1 | Low-quality    | Genome-fragment | NA | 4.2   | 0     |
| S12_vx_k141_1639901       | [full] | 61244 | No  | NA   | 31 | 2 | Medium-quality | Genome-fragment | NA | 81.13 | 0     |
| S12_vx_k141_774381        | [full] | 1830  | No  | NA   | 0  | 1 | Not-determined | Genome-fragment | NA | 0     | 0     |
| S12_vx_k141_376191        | [full] | 1973  | No  | NA   | 0  | 2 | Not-determined | Genome-fragment | NA | 0     | 0     |
| S14_vx_k141_594861        | [full] | 4599  | No  | NA   | 0  | 1 | Low-quality    | Genome-fragment | NA | 5.09  | 0     |
| S12_vx_k141_1484931       | [full] | 2743  | No  | NA   | 0  | 1 | Not-determined | Genome-fragment | NA | 0     | 0     |
| S5_extracted_k141_10607   |        | 4600  | No  | NA   | 1  | 0 | Low-quality    | Genome-fragment | NA | 7.23  | 0     |
| S12_vx_k141_1021221       | [full] | 2178  | No  | NA   | 0  | 1 | Not-determined | Genome-fragment | NA | 0     | 0     |
| S12_vx_k141_1095571       | [full] | 1775  | No  | NA   | 0  | 1 | Not-determined | Genome-fragment | NA | 0     | 0     |
| S12_vx_k141_1484981       | [full] | 3593  | No  | NA   | 0  | 3 | Not-determined | Genome-fragment | NA | 0     | 0     |
| S12_vx_k141_1095671       | [full] | 3036  | No  | NA   | 0  | 0 | Not-determined | Genome-fragment | NA | 0     | 0     |
| S12_vx_k141_537631        | [full] | 1318  | No  | NA   | 0  | 2 | Not-determined | Genome-fragment | NA | 0     | 0     |
| S12_vx_k141_221071        | [full] | 3259  | No  | NA   | 0  | 1 | Not-determined | Genome-fragment | NA | 0     | 0     |
| S12_vx_k141_919271        | [full] | 4601  | No  | NA   | 0  | 0 | Low-quality    | Genome-fragment | NA | 10.69 | 0     |
| S12_vx_k141_851621        | [full] | 1318  | No  | NA   | 0  | 1 | Not-determined | Genome-fragment | NA | 0     | 0     |
| S16_extracted_90717       |        | 4602  | No  | NA   | 1  | 0 | Low-quality    | Genome-fragment | NA | 2.5   | 0     |
| S12_vx_k141_1881951       | [full] | 3196  | No  | NA   | 0  | 3 | Not-determined | Genome-fragment | NA | 0     | 0     |
| S12_vx_k141_1717191       | [full] | 1074  | No  | NA   | 0  | 0 | Not-determined | Genome-fragment | NA | 0     | 0     |
| S16_vx_154481             | [full] | 4602  | No  | NA   | 0  | 2 | Low-quality    | Genome-fragment | NA | 2.3   | 0     |
| S12_vx_k141_775201        | [full] | 1614  | No  | NA   | 0  | 0 | Not-determined | Genome-fragment | NA | 0     | 0     |
| S12_vx_k141_1485501       | [full] | 1586  | No  | NA   | 0  | 1 | Not-determined | Genome-fragment | NA | 0     | 0     |
| S12_vx_k141_1164981       | [full] | 9077  | No  | NA   | 0  | 6 | Not-determined | Genome-fragment | NA | 0     | 0     |
| S8_vx_k141_885521         | [full] | 4604  | No  | NA   | 0  | 0 | Low-quality    | Genome-fragment | NA | 8.39  | 0     |
| S17_vx_k141_167581        | [full] | 4607  | No  | NA   | 2  | 0 | Low-quality    | Genome-fragment | NA | 10.9  | 0     |
| S12_vx_k141_1640561       | [full] | 6664  | No  | NA   | 0  | 1 | High-quality   | Genome-fragment | NA | 100   | 0     |
| S1_vx_k141_499481         | [full] | 4607  | No  | NA   | 0  | 3 | Low-quality    | Genome-fragment | NA | 1.96  | 0     |
| S3_extracted_k141_25384   |        | 4607  | Yes | 2103 | 1  | 2 | Low-quality    | Genome-fragment | NA | 1.33  | 54.35 |
| S8_extracted_k141_65542   |        | 4607  | No  | NA   | 0  | 0 | Low-quality    | Genome-fragment | NA | 11.39 | 0     |
| S12_vx_k141_221791        | [full] | 1079  | No  | NA   | 0  | 1 | Not-determined | Genome-fragment | NA | 0     | 0     |
| S3_extracted_k141_127705  |        | 4608  | No  | NA   | 3  | 0 | Low-quality    | Genome-fragment | NA | 8.02  | 0     |
| S14_vx_k141_133621        | [full] | 4609  | No  | NA   | 0  | 0 | Low-quality    | Genome-fragment | NA | 3.1   | 0     |
| S16_vx_216441             | [full] | 4609  | No  | NA   | 3  | 0 | Low-quality    | Genome-fragment | NA | 7.27  | 0     |
| S12_vx_k141_1717701       | [full] | 3036  | No  | NA   | 0  | 2 | Not-determined | Genome-fragment | NA | 0     | 0     |
| S12_vx_k141_538361        | [full] | 3290  | No  | NA   | 0  | 1 | Not-determined | Genome-fragment | NA | 0     | 0     |
| S13_extracted_72183       |        | 4612  | No  | NA   | 0  | 1 | Low-quality    | Genome-fragment | NA | 2.28  | 0     |
| S10_vx_666491             | [full] | 4612  | No  | NA   | 0  | 1 | Low-quality    | Genome-fragment | NA | 14.25 | 0     |
| S12_vx_k141_1792721       | [full] | 5271  | No  | NA   | 0  | 1 | Not-determined | Genome-fragment | NA | 7.86  | 0     |
| S8_extracted_k141_107099  |        | 4612  | No  | NA   | 0  | 0 | Low-quality    | Genome-fragment | NA | 7.61  | 0     |
| S10_extracted_43527       |        | 4613  | No  | NA   | 0  | 2 | Low-quality    | Genome-fragment | NA | 4.71  | 0     |
| S12_vx_k141_124311        | [full] | 4862  | No  | NA   | 0  | 4 | Not-determined | Genome-fragment | NA | 0     | 0     |
| S12_vx_k141_1165301       | [full] | 5395  | No  | NA   | 0  | 3 | Not-determined | Genome-fragment | NA | 0     | 0     |
| S12_vx_k141_938841        | [full] | 2723  | No  | NA   | 0  | 2 | Not-determined | Genome-fragment | NA | 0     | 0     |
| S13_vx_1186551            | [full] | 4614  | No  | NA   | 0  | 2 | Low-quality    | Genome-fragment | NA | 3.03  | 0     |
| S5_vx_k141_933201         | [full] | 4614  | No  | NA   | 5  | 0 | Low-quality    | Genome-fragment | NA | 6.79  | 0     |
| S11_vx_k141_595061        | [full] | 4616  | No  | NA   | 0  | 0 | Low-quality    | Genome-fragment | NA | 10.86 | 0     |
| S3_vx_k141_747821         | [full] | 4616  | No  | NA   | 2  | 0 | Low-quality    | Genome-fragment | NA | 5.99  | 0     |
| S12_vx_k141_165241        | [full] | 4617  | No  | NA   | 0  | 2 | Low-quality    | Genome-fragment | NA | 3.32  | 0     |
| S12_vx_k141_1862601       | [full] | 1300  | No  | NA   | 0  | 0 | Not-determined | Genome-fragment | NA | 0     | 0     |
| S5_vx_k141_1243131        | [full] | 4618  | No  | NA   | 0  | 1 | Low-quality    | Genome-fragment | NA | 1.54  | 0     |
| S8_extracted_k141_122599  |        | 4618  | No  | NA   | 0  | 0 | Low-quality    | Genome-fragment | NA | 4.92  | 0     |
| S1_vx_k141_688001         | [full] | 4621  | No  | NA   | 0  | 1 | Low-quality    | Genome-fragment | NA | 0.42  | 0     |
| S12_vx_k141_1882921       | [full] | 1448  | No  | NA   | 0  | 0 | Not-determined | Genome-fragment | NA | 0     | 0     |
| S12_vx_k141_72071         | [full] | 1000  | No  | NA   | 0  | 0 | Not-determined | Genome-fragment | NA | 0     | 0     |
| S16_extracted_154791      |        | 4622  | No  | NA   | 0  | 2 | Low-quality    | Genome-fragment | NA | 2.35  | 0     |
| S12_vx_k141_72131         | [full] | 1457  | No  | NA   | 3  | 0 | Not-determined | Genome-fragment | NA | 0     | 0     |
| S16_extracted_3461        |        | 4623  | Yes | 3718 | 1  | 1 | Low-quality    | Genome-fragment | NA | 6.24  | 19.58 |
| S12_vx_k141_1487171       | [full] | 1057  | No  | NA   | 0  | 1 | Not-determined | Genome-fragment | NA | 0     | 0     |
| S12_vx_k141_620971        | [full] | 1204  | No  | NA   | 0  | 0 | Not-determined | Genome-fragment | NA | 0     | 0     |
| S16_vx_100951             | [full] | 4627  | No  | NA   | 0  | 1 | Low-quality    | Genome-fragment | NA | 7.31  | 0     |
| S12_vx_k141_538841        | [full] | 1818  | No  | NA   | 0  | 1 | Not-determined | Genome-fragment | NA | 0     | 0     |
| S10_vx_567601             | [full] | 4621  | No  | NA   | 0  | 0 | Low-quality    | Genome-fragment | NA | 10.98 | 0     |
| S12_vx_k141_1243971       | [full] | 2725  | No  | NA   | 0  | 1 | Not-determined | Genome-fragment | NA | 0     | 0     |
| S16_vx_1585741            | [full] | 4635  | No  | NA   | 0  | 1 | Low-quality    | Genome-fragment | NA | 2.62  | 0     |
| S12_vx_k141_1793751       | [full] | 1250  | No  | NA   | 0  | 0 | Not-determined | Genome-fragment | NA | 0     | 0     |
| S14_extracted_k141_14608  |        | 4636  | No  | NA   | 0  | 0 | Low-quality    | Genome-fragment | NA | 5.7   | 0     |
| S16_extracted_7865        |        | 4636  | No  | NA   | 1  | 0 | Low-quality    | Genome-fragment | NA | 7.64  | 0     |
| S12_vx_k141_139801        | [full] | 3837  | No  | NA   | 0  | 2 | Not-determined | Genome-fragment | NA | 0     | 0     |
| S12_vx_k141_1793771       | [full] | 11977 | No  | NA   | 0  | 6 | Not-determined | Genome-fragment | NA | 0     | 0     |
| S12_vx_k141_139851        | [full] | 1545  | No  | NA   | 0  | 0 | Not-determined | Genome-fragment | NA | 0     | 0     |
| S12_vx_k141_1883871       | [full] | 1926  | No  | NA   | 0  | 0 | Not-determined | Genome-fragment | NA | 0     | 0     |
| S12_vx_k141_853801        | [full] | 3890  | No  | NA   | 0  | 1 | Not-determined | Genome-fragment | NA | 0     | 0     |
| S8_extracted_k141_27923   |        | 4636  | No  | NA   | 0  | 0 | Low-quality    | Genome-fragment | NA | 4.65  |       |



|                           |        |     |    |       |    |                |                 |                 |       |       |
|---------------------------|--------|-----|----|-------|----|----------------|-----------------|-----------------|-------|-------|
| S14_extracted_k141_112131 | 4657   | No  | NA | 4     | 0  | Low-quality    | Genome-fragment | 15.2            | 0     |       |
| S12_vs_k141_109944  full  | 2440   | No  | NA | 1     | 2  | Not-determined | Genome-fragment | NA              | 0     |       |
| S12_vs_k141_156078  full  | 1899   | No  | NA | 0     | 0  | Not-determined | Genome-fragment | NA              | 0     |       |
| S12_vs_k141_62418  full   | 1403   | No  | NA | 0     | 0  | Not-determined | Genome-fragment | NA              | 0     |       |
| S12_vs_k141_132855  full  | 5117   | No  | NA | 0     | 3  | Not-determined | Genome-fragment | NA              | 0     |       |
| S10_vs_k141_134861  full  | 4657   | No  | NA | 0     | 0  | Low-quality    | Genome-fragment | 2.1             | 0     |       |
| S8_extracted_k141_35204   | 4657   | No  | NA | 0     | 2  | Low-quality    | Genome-fragment | 7.68            | 0     |       |
| S14_vs_k141_45844  full   | 4659   | Yes | NA | 1971  | 1  | 1              | Low-quality     | Genome-fragment | 0.17  | 57.69 |
| S16_extracted_9055        | 4662   | No  | NA | 0     | 2  | Low-quality    | Genome-fragment | 2.18            | 0     |       |
| S12_vs_k141_188651  full  | 4730   | No  | NA | 0     | 1  | Not-determined | Genome-fragment | NA              | 0     |       |
| S17_extracted_k141_15848  | 4664   | No  | NA | 0     | 0  | Low-quality    | Genome-fragment | 5.2             | 0     |       |
| S17_extracted_k141_11995  | 4664   | No  | NA | 0     | 0  | Low-quality    | Genome-fragment | 2.74            | 0     |       |
| S12_vs_k141_54231  full   | 1105   | No  | NA | 0     | 1  | Not-determined | Genome-fragment | NA              | 0     |       |
| S12_vs_k141_18631  full   | 4664   | No  | NA | 1     | 0  | Low-quality    | Genome-fragment | 10.86           | 0     |       |
| S12_vs_k141_30768  full   | 16489  | No  | NA | 0     | 8  | Not-determined | Genome-fragment | NA              | 0     |       |
| S14_vs_k141_125661  full  | 4665   | No  | NA | 0     | 0  | Low-quality    | Genome-fragment | 8.86            | 0     |       |
| S12_vs_k141_70241  full   | 3052   | No  | NA | 1     | 0  | Medium-quality | Genome-fragment | 73.34           | 0     |       |
| S12_vs_k141_7562  full    | 1399   | No  | NA | 0     | 1  | Not-determined | Genome-fragment | NA              | 0     |       |
| S12_vs_k141_149129  full  | 2325   | No  | NA | 0     | 1  | Not-determined | Genome-fragment | NA              | 0     |       |
| S12_vs_k141_110007  full  | 3406   | No  | NA | 0     | 2  | Not-determined | Genome-fragment | NA              | 0     |       |
| S12_vs_k141_37671  full   | 4665   | No  | NA | 7     | 0  | Low-quality    | Genome-fragment | 12.58           | 0     |       |
| S12_vs_k141_62484  full   | 1243   | No  | NA | 0     | 2  | Not-determined | Genome-fragment | NA              | 0     |       |
| S12_vs_k141_164490  full  | 5092   | No  | NA | 0     | 3  | Not-determined | Genome-fragment | NA              | 0     |       |
| S12_vs_k141_14370  full   | 8213   | No  | NA | 0     | 3  | Not-determined | Genome-fragment | NA              | 0     |       |
| S12_vs_k141_84001  full   | 4666   | No  | NA | 0     | 1  | Low-quality    | Genome-fragment | 6.3             | 0     |       |
| S5_extracted_k141_117504  | 4666   | No  | NA | 0     | 2  | Low-quality    | Genome-fragment | 7.93            | 0     |       |
| S10_extracted_53727       | 4666   | No  | NA | 0     | 0  | Low-quality    | Genome-fragment | 13.04           | 0     |       |
| S1_vs_k141_87165  full    | 4668   | No  | NA | 2     | 0  | Low-quality    | Genome-fragment | 12.49           | 0     |       |
| S11_extracted_k141_17855  | 4669   | No  | NA | 1     | 0  | Low-quality    | Genome-fragment | 8.3             | 0     |       |
| S12_vs_k141_64127  full   | 4670   | No  | NA | 0     | 0  | Low-quality    | Genome-fragment | 12.59           | 0     |       |
| S12_vs_k141_94042  full   | 39033  | Yes | NA | 36811 | 12 | 3              | Medium-quality  | Genome-fragment | 72.42 | 5.69  |
| S12_vs_k141_124718  full  | 1458   | No  | NA | 0     | 1  | Low-quality    | Genome-fragment | NA              | 0     |       |
| S6_extracted_k141_40729   | 4670   | No  | NA | 0     | 4  | Low-quality    | Genome-fragment | 3.74            | 0     |       |
| S9_vs_k141_36233  full    | 4671   | No  | NA | 3     | 0  | Low-quality    | Genome-fragment | 6.71            | 0     |       |
| S12_vs_k141_124722  full  | 1097   | No  | NA | 0     | 0  | Not-determined | Genome-fragment | NA              | 0     |       |
| S16_vs_k141_14012  full   | 4671   | Yes | NA | 1022  | 2  | Low-quality    | Genome-fragment | 1.45            | 78.12 |       |
| S12_extracted_k141_141741 | 4672   | No  | NA | 3     | 0  | Low-quality    | Genome-fragment | 11.55           | 0     |       |
| S12_vs_k141_30845  full   | 1118   | No  | NA | 0     | 1  | Not-determined | Genome-fragment | NA              | 0     |       |
| S12_vs_k141_78016  full   | 7357   | No  | NA | 0     | 1  | Not-determined | Genome-fragment | NA              | 0     |       |
| S16_extracted_173108      | 4673   | No  | NA | 0     | 0  | Low-quality    | Genome-fragment | 5.74            | 0     |       |
| S12_vs_k141_141514  full  | 3695   | No  | NA | 0     | 0  | Not-determined | Genome-fragment | NA              | 0     |       |
| S12_vs_k141_22640  full   | 1119   | No  | NA | 0     | 0  | Not-determined | Genome-fragment | NA              | 0     |       |
| S12_vs_k141_149183  full  | 2528   | No  | NA | 0     | 1  | Not-determined | Genome-fragment | NA              | 0     |       |
| S12_vs_k141_94092  full   | 1043   | No  | NA | 0     | 0  | Not-determined | Genome-fragment | NA              | 0     |       |
| S12_vs_k141_94097  full   | 1523   | No  | NA | 0     | 2  | Not-determined | Genome-fragment | NA              | 0     |       |
| S12_vs_k141_116933  full  | 3158   | No  | NA | 0     | 2  | Not-determined | Genome-fragment | NA              | 0     |       |
| S16_vs_39321  full        | 4673   | No  | NA | 0     | 0  | Low-quality    | Genome-fragment | 10.25           | 0     |       |
| S12_vs_k141_141550  full  | 5422   | No  | NA | 0     | 4  | Not-determined | Genome-fragment | NA              | 0     |       |
| S12_vs_k141_179851  full  | 4109   | No  | NA | 0     | 2  | Not-determined | Genome-fragment | NA              | 0     |       |
| S12_vs_k141_38081  full   | 3821   | No  | NA | 0     | 3  | Not-determined | Genome-fragment | NA              | 0     |       |
| S12_vs_k141_133022  full  | 2289   | No  | NA | 0     | 2  | Not-determined | Genome-fragment | NA              | 0     |       |
| S12_vs_k141_179804  full  | 1216   | No  | NA | 0     | 0  | Not-determined | Genome-fragment | NA              | 0     |       |
| S9_extracted_k141_13843   | 4674   | No  | NA | 1     | 0  | Low-quality    | Genome-fragment | 0.38            | 0     |       |
| S12_vs_k141_110143  full  | 1741   | No  | NA | 0     | 0  | Not-determined | Genome-fragment | NA              | 0     |       |
| S12_vs_k141_14467  full   | 5985   | No  | NA | 3     | 3  | Medium-quality | Genome-fragment | 50.18           | 0     |       |
| S5_extracted_k141_102751  | 4674   | No  | NA | 0     | 0  | Low-quality    | Genome-fragment | 13.01           | 0     |       |
| S7_extracted_115928       | 4674   | No  | NA | 0     | 1  | Low-quality    | Genome-fragment | 6.99            | 0     |       |
| S12_vs_k141_124772  full  | 4311   | No  | NA | 0     | 1  | Not-determined | Genome-fragment | NA              | 0     |       |
| S8_extracted_k141_124554  | 4674   | No  | NA | 0     | 1  | Low-quality    | Genome-fragment | 2.69            | 0     |       |
| S12_vs_k141_133065  full  | 2223   | No  | NA | 0     | 0  | Not-determined | Genome-fragment | NA              | 0     |       |
| S12_vs_k141_85806  full   | 1901   | No  | NA | 0     | 0  | Not-determined | Genome-fragment | NA              | 0     |       |
| S12_vs_k141_62616  full   | 1796   | No  | NA | 0     | 1  | Not-determined | Genome-fragment | NA              | 0     |       |
| S12_vs_k141_30963  full   | 3503   | No  | NA | 0     | 4  | Not-determined | Genome-fragment | NA              | 0     |       |
| S12_vs_k141_38145  full   | 1142   | No  | NA | 0     | 1  | Not-determined | Genome-fragment | NA              | 0     |       |
| S12_vs_k141_164626  full  | 1301   | No  | NA | 0     | 1  | Not-determined | Genome-fragment | NA              | 0     |       |
| S8_vs_k141_9347  full     | 4674   | No  | NA | 5     | 0  | Low-quality    | Genome-fragment | 13.07           | 0     |       |
| S16_extracted_9385        | 4675   | No  | NA | 3     | 0  | Low-quality    | Genome-fragment | 10.42           | 0     |       |
| S5_extracted_k141_9381    | 4677   | No  | NA | 6     | 0  | Low-quality    | Genome-fragment | 14.82           | 0     |       |
| S8_extracted_k141_112208  | 4677   | No  | NA | 0     | 1  | Low-quality    | Genome-fragment | NA              | 0     |       |
| S12_vs_k141_179951  full  | 2424   | No  | NA | 0     | 1  | Not-determined | Genome-fragment | NA              | 0     |       |
| S13_extracted_126814      | 4678   | No  | NA | 0     | 4  | Low-quality    | Genome-fragment | 2.14            | 0     |       |
| S16_extracted_50838       | 4680   | No  | NA | 0     | 1  | Low-quality    | Genome-fragment | 5.07            | 0     |       |
| S12_vs_k141_179969  full  | 2307   | No  | NA | 0     | 0  | Not-determined | Genome-fragment | NA              | 0     |       |
| S12_vs_k141_14548  full   | 1711   | No  | NA | 0     | 2  | Not-determined | Genome-fragment | NA              | 0     |       |
| S12_vs_k141_94181  full   | 22565  | No  | NA | 0     | 2  | Not-determined | Genome-fragment | NA              | 0     |       |
| S12_extracted_k141_137860 | 4680   | No  | NA | 3     | 0  | Low-quality    | Genome-fragment | 4.49            | 0     |       |
| S12_vs_k141_156179  full  | 1393   | No  | NA | 0     | 0  | Not-determined | Genome-fragment | NA              | 0     |       |
| S1_vs_k141_154416  full   | 4681   | No  | NA | 0     | 2  | Low-quality    | Genome-fragment | 2.39            | 0     |       |
| S12_vs_k141_704861  full  | 3340   | No  | NA | 0     | 0  | Not-determined | Genome-fragment | NA              | 0     |       |
| S5_extracted_k141_117457  | 4682   | No  | NA | 1     | 0  | Low-quality    | Genome-fragment | 10.16           | 0     |       |
| S12_vs_k141_141721  full  | 3508   | No  | NA | 0     | 1  | Not-determined | Genome-fragment | NA              | 0     |       |
| S12_vs_k141_544761  full  | 1415   | No  | NA | 0     | 1  | Not-determined | Genome-fragment | NA              | 0     |       |
| S10_extracted_97360       | 4682   | No  | NA | 1     | 0  | Low-quality    | Genome-fragment | 9.32            | 0     |       |
| S12_vs_k141_124867  full  | 1828   | No  | NA | 0     | 0  | Not-determined | Genome-fragment | NA              | 0     |       |
| S17_extracted_k141_126234 | 4684   | No  | NA | 0     | 0  | Low-quality    | Genome-fragment | 15.44           | 0     |       |
| S12_vs_k141_22853  full   | 30882  | No  | NA | 27    | 1  | Medium-quality | Genome-fragment | 89.68           | 0     |       |
| S5_extracted_k141_38563   | 4684   | No  | NA | 8     | 0  | Low-quality    | Genome-fragment | 15.45           | 0     |       |
| S5_extracted_k141_93783   | 4685   | No  | NA | 2     | 0  | Low-quality    | Genome-fragment | 11.03           | 0     |       |
| S12_vs_k141_148381  full  | 3617   | No  | NA | 0     | 1  | Not-determined | Genome-fragment | NA              | 0     |       |
| S12_vs_k141_78233  full   | 1442   | No  | NA | 0     | 1  | Not-determined | Genome-fragment | NA              | 0     |       |
| S12_vs_k141_149389  full  | 1524   | No  | NA | 0     | 0  | Not-determined | Genome-fragment | NA              | 0     |       |
| S12_vs_k141_180061  full  | 4685   | No  | NA | 0     | 0  | Low-quality    | Genome-fragment | 12.03           | 0     |       |
| S17_extracted_k141_38194  | 4686   | No  | NA | 0     | 1  | Low-quality    | Genome-fragment | 7.09            | 0     |       |
| S5_extracted_k141_85751   | 4688   | No  | NA | 6     | 0  | Low-quality    | Genome-fragment | 14.44           | 0     |       |
| S12_vs_k141_164716  full  | 1583   | No  | NA | 1     | 1  | Not-determined | Genome-fragment | NA              | 0     |       |
| S10_vs_72019  full        | 4688   | No  | NA | 1     | 0  | Low-quality    | Genome-fragment | 10.96           | 0     |       |
| S12_vs_k141_188718  full  | 1595   | No  | NA | 0     | 0  | Not-determined | Genome-fragment | NA              | 0     |       |
| S12_vs_k141_124923  full  | 3022   | No  | NA | 0     | 2  | Not-determined | Genome-fragment | NA              | 0     |       |
| S11_extracted_k141_68209  | 4689   | No  | NA | 0     | 0  | Low-quality    | Genome-fragment | 12.36           | 0     |       |
| S12_vs_k141_156236  full  | 3603   | No  | NA | 0     | 0  | Not-determined | Genome-fragment | NA              | 0     |       |
| S12_vs_k141_94266  full   | 1878   | No  | NA | 0     | 0  | Not-determined | Genome-fragment | NA              | 0     |       |
| S12_vs_k141_149405  full  | 1844   | No  | NA | 0     | 2  | Not-determined | Genome-fragment | NA              | 0     |       |
| S12_vs_k141_133070  full  | 132222 | Yes | NA | 76271 | 17 | 40             | Medium-quality  | Genome-fragment | 56.81 | 42.32 |
| S14_vs_k141_542051  full  | 4690   | No  | NA | 3     | 0  | Low-quality    | Genome-fragment | 13.58           | 0     |       |
| S12_vs_k141_156264  full  | 1255   | No  | NA | 0     | 0  | Not-determined | Genome-fragment | NA              | 0     |       |
| S5_vs_k141_66359  full    | 4690   | No  | NA | 1     | 0  | Low-quality    | Genome-fragment | 9.88            | 0     |       |
| S12_vs_k141_164760  full  | 1569   | No  | NA | 0     | 1  | Not-determined | Genome-fragment | NA              | 0     |       |
| S12_vs_k141_77629  full   | 4690   | No  | NA | 1     | 0  | Low-quality    | Genome-fragment | 3               | 0     |       |
| S12_vs_k141_70589  full   | 9319   | No  | NA | 0     | 2  | Not-determined | Genome-fragment | NA              | 0     |       |
| S8_extracted_k141_31469   | 4690   | No  | NA | 3     | 0  | Low-quality    | Genome-fragment | 14.03           | 0     |       |
| S5_vs_k141_52525  full    | 4692   | No  | NA | 3     | 0  | Low-quality    | Genome-fragment | 12.41           | 0     |       |
| S12_vs_k141_200051  full  | 4692   | No  | NA | 0     | 1  | Low-quality    | Genome-fragment | 0.04            | 0     |       |
| S12_vs_k141_117193  full  | 2400   | No  | NA | 0     | 4  | Not-determined | Genome-fragment | NA              | 0     |       |
| S5_extracted_k141_112336  | 4693   | No  | NA | 0     | 1  | Low-quality    | Genome-fragment | 5.74            | 0     |       |
| S12_vs_k141_628551  full  | 1159   | No  | NA | 0     | 0  | Not-determined | Genome-fragment | NA              | 0     |       |
| S12_vs_k141_125006  full  | 1263   | No  | NA | 0     | 1  | Not-determined | Genome-fragment | NA              | 0     |       |
| S12_vs_k141_117202  full  | 4723   | No  | NA | 0     | 2  | Not-determined | Genome-fragment | NA              | 0     |       |
| S11_extracted_k141_34550  | 4698   | No  | NA | 2     | 0  | Low-quality    | Genome-fragment | 11.21           | 0     |       |
| S3_vs_k141_17469  full    | 4698   | No  | NA | 0     | 0  | Low-quality    | Genome-fragment | 12.08           | 0     |       |
| S11_vs_k141_36152  full   | 4699   | No  | NA | 0     | 0  | Low-quality    | Genome-fragment | 10.57           | 0     |       |
| S12_vs_k141_117231  full  | 2287   | No  | NA | 0     | 2  | Not-determined | Genome-fragment | NA              | 0     |       |
| S12_vs_k141_1800921  full | 1213   | No  | NA | 0     | 0  | Not-determined | Genome-fragment | NA              | 0     |       |
| S12_vs_k141_62922  full   | 5795   | No  | NA | 0     | 6  | Not-determined | Genome-fragment | NA              | 0     |       |
| S12_vs_k141_147771  full  | 1723   | No  | NA | 0     | 0  | Not-determined | Genome-fragment | NA              | 0     |       |
| S12_vs_k141_149527  full  | 2682   | No  | NA | 0     | 3  | Not-determined | Genome-fragment | NA              | 0     |       |
| S12_vs_k141_180112  full  | 1029   | No  | NA | 0     | 0  | Not-determined | Genome-fragment | NA              | 0     |       |
| S12_extracted_k141_97043  | 4700   | No  | NA | 0     | 2  | Low-quality    | Genome-fragment | 0.81            | 0     |       |
| S12_vs_k141_62933  full   | 2306   | No  | NA | 0     | 0  | Not-determined | Genome-fragment | NA              | 0     |       |
| S12_vs_k141_149539  full  | 1510   | No  | NA | 0     | 0  | Not-determined | Genome-fragment | NA              | 0     |       |
| S12_vs_k141_54649  full   | 3846   | No  | NA | 0     | 0  | Not-determined | Genome-fragment | NA              | 0     |       |
| S8_vs_k141_118945  full   | 4700   | No  | NA | 0     | 2  | Low-quality    | Genome-fragment | 3.43            | 0     |       |
| S12_vs_k141_381831  full  | 5841   | No  | NA | 0     | 0  | Not-determined | Genome-fragment | NA              | 0     |       |
| S12_vs_k141_180136  full  | 1214   | No  | NA | 0     | 0  | Not-determined | Genome-fragment | NA              | 0     |       |
| S13_extracted_28415       | 4702   | No  | NA | 0     | 4  | Low-quality    | Genome-fragment | 1.25            | 0     |       |
| S12_vs_k141_546701  full  | 1403   | No  | NA | 0     | 0  | Not-determined | Genome-fragment | NA              | 0     |       |
| S12_vs_k141_311791  full  | 1672   | No  | NA | 0     | 2  | Not-determined | Genome-fragment | NA              | 0     |       |
| S12_vs_k141_707091  full  | 1646   | No  | NA | 0     | 2  | Not-determined | Genome-fragment | NA              | 0     |       |
| S12_vs_k141_311821  full  | 2768   | No  | NA | 0     | 0  | Not-determined | Genome-fragment | NA              | 0     |       |
| S7_vs_81880  full         | 4703   | No  | NA | 0     | 0  | Low-quality    | Genome-fragment | 3.25            | 0     |       |
| S8_extracted_k141_164611  | 4703   | No  | NA | 3     | 0  | Low-quality    | Genome-fragment | 7.83            | 0     |       |
| S12_vs_k141_133246  full  | 5942   | No  | NA | 0     | 5  | Not-determined | Genome-fragment | NA              | 0     |       |
| S3_extracted_k141_1123523 | 4704   | No  | NA | 0     | 0  | Low-quality    |                 |                 |       |       |



|                               |       |     |       |   |                |                 |                 |       |       |
|-------------------------------|-------|-----|-------|---|----------------|-----------------|-----------------|-------|-------|
| S16_extracted_8845            | 4708  | No  | NA    | 5 | 0              | Low-quality     | Genome-fragment | 12.86 | 0     |
| S12_vs_k141_117518  full      | 4403  | No  | NA    | 2 | Not-determined | Genome-fragment | NA              | 0     | 0     |
| S12_vs_k141_180475  full      | 1226  | No  | NA    | 0 | Not-determined | Genome-fragment | NA              | 0     | 0     |
| S12_vs_k141_149811  full      | 4393  | No  | NA    | 0 | Not-determined | Genome-fragment | NA              | 0     | 0     |
| S14_extracted_k141_59496      | 4710  | No  | NA    | 0 | 2              | Low-quality     | Genome-fragment | 1.86  | 0     |
| S3_extracted_k141_98930       | 4711  | No  | NA    | 0 | 1              | Low-quality     | Genome-fragment | 7.76  | 0     |
| S12_vs_k141_86569  full       | 1198  | No  | NA    | 0 | Not-determined | Genome-fragment | NA              | 0     | 0     |
| S12_vs_k141_65898  full       | 4713  | No  | NA    | 0 | 3              | Low-quality     | Genome-fragment | 2.76  | 0     |
| S12_vs_k141_86580  full       | 7213  | No  | NA    | 0 | Not-determined | Genome-fragment | NA              | 0     | 0     |
| S1_vs_k141_89772  full        | 4714  | No  | NA    | 0 | 6              | Low-quality     | Genome-fragment | 1.4   | 0     |
| S12_vs_k141_86604  full       | 1358  | No  | NA    | 0 | 1              | Not-determined  | Genome-fragment | NA    | 0     |
| S5_extracted_k141_101936      | 4714  | No  | NA    | 0 | 2              | Low-quality     | Genome-fragment | 4.34  | 0     |
| S4_extracted_22159            | 4717  | No  | NA    | 3 | 0              | Low-quality     | Genome-fragment | 11.76 | 0     |
| S11_extracted_k141_76887      | 4719  | No  | NA    | 1 | 0              | Low-quality     | Genome-fragment | 8.47  | 0     |
| S12_vs_k141_38939  full       | 2195  | No  | NA    | 0 | 2              | Not-determined  | Genome-fragment | NA    | 0     |
| S15_vs_46889  full            | 4719  | No  | NA    | 0 | 1              | Low-quality     | Genome-fragment | 3.88  | 0     |
| S12_vs_k141_156896  full      | 2727  | No  | NA    | 0 | 2              | Not-determined  | Genome-fragment | NA    | 0     |
| S12_vs_k141_23574  full       | 1257  | No  | NA    | 0 | 1              | Not-determined  | Genome-fragment | NA    | 0     |
| S11_extracted_k141_103543     | 4721  | No  | NA    | 1 | 0              | Low-quality     | Genome-fragment | 4.25  | 0     |
| S12_vs_k141_117759  full      | 1621  | No  | NA    | 0 | 2              | Not-determined  | Genome-fragment | NA    | 0     |
| S12_vs_k141_15201  full       | 1825  | No  | NA    | 0 | 2              | Not-determined  | Genome-fragment | NA    | 0     |
| S5_vs_k141_53991  full        | 4721  | No  | NA    | 0 | 1              | Low-quality     | Genome-fragment | 7.68  | 0     |
| S7_vs_123614  full            | 4722  | No  | NA    | 0 | 0              | Low-quality     | Genome-fragment | 13.42 | 0     |
| S7_extracted_98313            | 4723  | No  | NA    | 4 | 0              | Low-quality     | Genome-fragment | 14.23 | 0     |
| S11_vs_k141_60579  full       | 4724  | No  | NA    | 0 | 0              | Low-quality     | Genome-fragment | 10.41 | 0     |
| S12_vs_k141_133843  full      | 6741  | No  | NA    | 0 | 2              | Not-determined  | Genome-fragment | NA    | 0     |
| S5_vs_k141_28654  full        | 4724  | No  | NA    | 1 | 0              | Low-quality     | Genome-fragment | 10.07 | 0     |
| S12_vs_k141_125520  full      | 1126  | No  | NA    | 0 | 0              | Not-determined  | Genome-fragment | NA    | 0     |
| S1_vs_k141_36427  full        | 4725  | No  | NA    | 0 | 1              | Low-quality     | Genome-fragment | 3.16  | 0     |
| S12_vs_k141_125527  full      | 1857  | No  | NA    | 0 | 1              | Not-determined  | Genome-fragment | NA    | 0     |
| S12_vs_k141_39054  full       | 2326  | No  | NA    | 0 | 2              | Not-determined  | Genome-fragment | NA    | 0     |
| S3_vs_k141_11793  full        | 4725  | No  | NA    | 1 | 0              | Low-quality     | Genome-fragment | 7.61  | 0     |
| S12_vs_k141_157003  full      | 1214  | No  | NA    | 0 | 1              | Not-determined  | Genome-fragment | NA    | 0     |
| S12_vs_k141_151316  full      | 4725  | No  | NA    | 0 | 0              | Low-quality     | Genome-fragment | 8.06  | 0     |
| S12_vs_k141_15339  full       | 1733  | No  | NA    | 0 | 2              | Not-determined  | Genome-fragment | NA    | 0     |
| S17_vs_k141_159630  full      | 4726  | No  | NA    | 0 | 1              | Low-quality     | Genome-fragment | 2.74  | 0     |
| S1_extracted_k141_19851       | 4727  | No  | NA    | 1 | 0              | Low-quality     | Genome-fragment | 7.07  | 0     |
| S12_vs_k141_117948  full      | 2495  | No  | NA    | 0 | 2              | Not-determined  | Genome-fragment | NA    | 0     |
| S12_vs_k141_125659  full      | 1314  | No  | NA    | 0 | 0              | Not-determined  | Genome-fragment | NA    | 0     |
| S10_vs_79807  full            | 4727  | No  | NA    | 0 | 0              | Low-quality     | Genome-fragment | 5.89  | 0     |
| S12_vs_k141_102047  full      | 4728  | Yes | 3569  | 1 | 2              | Low-quality     | Genome-fragment | 7.2   | 24.51 |
| S12_vs_k141_173025  full      | 2584  | No  | NA    | 2 | Not-determined | Genome-fragment | NA              | 0     | 0     |
| S12_vs_k141_121866  full      | 4729  | No  | NA    | 2 | 0              | Low-quality     | Genome-fragment | 11.69 | 0     |
| S12_vs_k141_180692  full      | 2950  | No  | NA    | 0 | 0              | Not-determined  | Genome-fragment | NA    | 0     |
| S5_vs_k141_43235  full        | 4731  | No  | NA    | 0 | 0              | Low-quality     | Genome-fragment | 9.13  | 0     |
| S12_vs_k141_125702  full      | 1701  | No  | NA    | 0 | 0              | Not-determined  | Genome-fragment | NA    | 0     |
| S8_extracted_k141_108083      | 4732  | No  | NA    | 0 | 3              | Low-quality     | Genome-fragment | 2.6   | 0     |
| S17_extracted_k141_70526      | 4733  | No  | NA    | 4 | 0              | Low-quality     | Genome-fragment | 7.52  | 0     |
| S12_vs_k141_39260  full       | 1512  | No  | NA    | 0 | 0              | Not-determined  | Genome-fragment | NA    | 0     |
| S12_vs_k141_173132  full      | 1589  | No  | NA    | 0 | 3              | Not-determined  | Genome-fragment | NA    | 0     |
| S12_vs_k141_125714  full      | 9069  | No  | NA    | 0 | 4              | Not-determined  | Genome-fragment | NA    | 0     |
| S16_extracted_112920          | 4733  | No  | NA    | 3 | 0              | Low-quality     | Genome-fragment | 11.64 | 0     |
| S8_extracted_k141_46640       | 4735  | No  | NA    | 3 | 0              | Low-quality     | Genome-fragment | 24.23 | 0     |
| S10_vs_106627  full           | 4736  | No  | NA    | 0 | 0              | Low-quality     | Genome-fragment | 8.56  | 0     |
| S12_vs_k141_15596  full       | 1798  | No  | NA    | 0 | 0              | Not-determined  | Genome-fragment | NA    | 0     |
| S12_vs_k141_156271  full      | 1667  | No  | NA    | 0 | 0              | Not-determined  | Genome-fragment | NA    | 0     |
| S8_extracted_k141_95041       | 4737  | No  | NA    | 0 | 0              | Low-quality     | Genome-fragment | 10.68 | 0     |
| S11_vs_k141_55201  full       | 4738  | No  | NA    | 0 | 0              | Low-quality     | Genome-fragment | 3.8   | 0     |
| S13_vs_46653  full            | 4738  | No  | NA    | 0 | 0              | Low-quality     | Genome-fragment | 11.84 | 0     |
| S12_vs_k141_180878  full      | 2075  | No  | NA    | 0 | 0              | Not-determined  | Genome-fragment | NA    | 0     |
| S12_vs_k141_180915  full      | 1634  | No  | NA    | 0 | 0              | Not-determined  | Genome-fragment | NA    | 0     |
| S12_vs_k141_180930  full      | 1801  | No  | NA    | 0 | 1              | Not-determined  | Genome-fragment | NA    | 0     |
| S12_vs_k141_23796  0_partial  | 63354 | Yes | 38428 | 9 | 13             | Medium-quality  | Genome-fragment | 89.72 | 39.34 |
| S16_extracted_130867          | 4738  | No  | NA    | 1 | 0              | Low-quality     | Genome-fragment | 10.57 | 0     |
| S8_extracted_k141_21739       | 4738  | No  | NA    | 0 | 0              | Low-quality     | Genome-fragment | 9.56  | 0     |
| S12_vs_k141_158058  0_partial | 13533 | No  | NA    | 0 | 10             | Not-determined  | Genome-fragment | NA    | 0     |
| S8_vs_k141_64587  full        | 4738  | No  | NA    | 0 | 0              | Low-quality     | Genome-fragment | 6.78  | 0     |
| S8_vs_k141_50252  full        | 4739  | No  | NA    | 1 | 0              | Low-quality     | Genome-fragment | 2.8   | 0     |
| S12_vs_k141_100765  0_partial | 2201  | No  | NA    | 0 | 2              | Not-determined  | Genome-fragment | NA    | 0     |
| S8_vs_k141_74906  full        | 4739  | No  | NA    | 0 | 3              | Low-quality     | Genome-fragment | 13.98 | 0     |
| S5_extracted_k141_135638      | 4740  | No  | NA    | 4 | 0              | Low-quality     | Genome-fragment | 11.66 | 0     |
| S3_extracted_k141_9103        | 4741  | No  | NA    | 0 | 0              | Low-quality     | Genome-fragment | 4.77  | 0     |
| S12_vs_k141_32669  0_partial  | 24358 | No  | NA    | 0 | 7              | Medium-quality  | Genome-fragment | 69.41 | 0     |
| S12_extracted_k141_44092      | 4741  | No  | NA    | 0 | 3              | Low-quality     | Genome-fragment | 1.86  | 0     |
| S12_vs_k141_25672  0_partial  | 33729 | No  | NA    | 0 | 0              | Not-determined  | Genome-fragment | NA    | 0     |
| S17_extracted_k141_149665     | 4744  | No  | NA    | 3 | 0              | Low-quality     | Genome-fragment | 11.63 | 0     |
| S12_vs_k141_183908  0_partial | 15965 | No  | NA    | 0 | 11             | Not-determined  | Genome-fragment | NA    | 0     |
| S1_vs_k141_104833  full       | 4744  | No  | NA    | 0 | 0              | Low-quality     | Genome-fragment | 9.11  | 0     |
| S14_extracted_k141_75528      | 4745  | No  | NA    | 0 | 0              | Low-quality     | Genome-fragment | 15.62 | 0     |
| S12_vs_k141_58711  0_partial  | 16022 | No  | NA    | 0 | 8              | Not-determined  | Genome-fragment | NA    | 0     |
| S12_vs_k141_19581  0_partial  | 25769 | No  | NA    | 0 | 9              | Not-determined  | Genome-fragment | NA    | 0     |
| S12_vs_k141_106720  0_partial | 11760 | No  | NA    | 0 | 8              | Not-determined  | Genome-fragment | NA    | 0     |
| S8_vs_k141_163821  full       | 4746  | No  | NA    | 0 | 0              | Low-quality     | Genome-fragment | 5.17  | 0     |
| S16_extracted_87713           | 4747  | No  | NA    | 2 | 0              | Low-quality     | Genome-fragment | 12.78 | 0     |
| S10_vs_11637  full            | 4747  | No  | NA    | 0 | 0              | Low-quality     | Genome-fragment | 11.66 | 0     |
| S7_extracted_113393           | 4749  | No  | NA    | 4 | 0              | Low-quality     | Genome-fragment | 11.78 | 0     |
| S12_vs_k141_6860  0_partial   | 12553 | No  | NA    | 0 | 2              | Not-determined  | Genome-fragment | NA    | 0     |
| S12_vs_k141_16474  0_partial  | 11758 | No  | NA    | 0 | 4              | Not-determined  | Genome-fragment | NA    | 0     |
| S12_vs_k141_171517  0_partial | 11758 | No  | NA    | 0 | 0              | Not-determined  | Genome-fragment | NA    | 0     |
| S12_vs_k141_125063  0_partial | 14010 | No  | NA    | 0 | 1              | Not-determined  | Genome-fragment | NA    | 0     |
| S16_extracted_11869           | 4750  | No  | NA    | 2 | 0              | Low-quality     | Genome-fragment | 5.62  | 0     |
| S12_vs_k141_165294  0_partial | 16135 | No  | NA    | 5 | Not-determined | Genome-fragment | NA              | 0     | 0     |
| S7_extracted_44613            | 4751  | No  | NA    | 1 | 0              | Low-quality     | Genome-fragment | 9.78  | 0     |
| S16_vs_1858  full             | 4751  | No  | NA    | 2 | 0              | Low-quality     | Genome-fragment | 12.18 | 0     |
| S15_vs_50996  full            | 4752  | No  | NA    | 0 | 0              | Low-quality     | Genome-fragment | 8.51  | 0     |
| S5_extracted_k141_47093       | 4754  | No  | NA    | 3 | 0              | Low-quality     | Genome-fragment | 14.75 | 0     |
| S10_extracted_55920           | 4754  | No  | NA    | 0 | 1              | Low-quality     | Genome-fragment | 7.94  | 0     |
| S8_vs_k141_156388  full       | 4754  | No  | NA    | 0 | 0              | Low-quality     | Genome-fragment | 10.91 | 0     |
| S12_vs_k141_38995  1 2gene    | 1517  | No  | NA    | 0 | 0              | Not-determined  | Genome-fragment | NA    | 0     |
| S8_vs_k141_137807  full       | 4754  | No  | NA    | 0 | 1              | Low-quality     | Genome-fragment | 5.75  | 0     |
| S6_vs_k141_11756  full        | 4755  | No  | NA    | 0 | 1              | Low-quality     | Genome-fragment | 6.63  | 0     |
| S8_vs_k141_165738  full       | 4755  | No  | NA    | 1 | 0              | Low-quality     | Genome-fragment | 1.62  | 0     |
| S8_extracted_k141_139810      | 4756  | No  | NA    | 0 | 0              | Low-quality     | Genome-fragment | 8.35  | 0     |
| S4_extracted_30434            | 4757  | No  | NA    | 3 | 0              | Low-quality     | Genome-fragment | 8.63  | 0     |
| S3_extracted_k141_103653      | 4758  | No  | NA    | 3 | 0              | Low-quality     | Genome-fragment | 2.04  | 0     |
| S16_vs_6144  full             | 4758  | No  | NA    | 2 | 0              | Low-quality     | Genome-fragment | 1.67  | 0     |
| S10_extracted_36515           | 4759  | No  | NA    | 4 | 0              | Low-quality     | Genome-fragment | 11.2  | 0     |
| S9_vs_k141_3414  full         | 4761  | No  | NA    | 1 | 0              | Low-quality     | Genome-fragment | 10.93 | 0     |
| S12_vs_k141_79765  1 2gene    | 1109  | No  | NA    | 1 | 1              | Not-determined  | Genome-fragment | NA    | 0     |
| S14_vs_k141_55180  full       | 4761  | No  | NA    | 3 | 0              | Low-quality     | Genome-fragment | 12.13 | 0     |
| S12_vs_k141_45899  full       | 4761  | No  | NA    | 6 | 0              | Low-quality     | Genome-fragment | 3.27  | 0     |
| S5_vs_k141_122413  full       | 4761  | No  | NA    | 0 | 0              | Low-quality     | Genome-fragment | 10.03 | 0     |
| S12_vs_k141_56852  1 2gene    | 1169  | No  | NA    | 0 | 0              | Not-determined  | Genome-fragment | NA    | 0     |
| S12_vs_k141_103977  1 2gene   | 1703  | No  | NA    | 0 | 0              | Not-determined  | Genome-fragment | NA    | 0     |
| S12_vs_k141_104056  1 2gene   | 1555  | No  | NA    | 0 | 0              | Not-determined  | Genome-fragment | NA    | 0     |
| S10_extracted_313             | 4761  | No  | NA    | 0 | 0              | Low-quality     | Genome-fragment | 10.34 | 0     |
| S12_extracted_k141_28239      | 4762  | Yes | 3821  | 1 | 1              | Low-quality     | Genome-fragment | 7.15  | 19.76 |
| S8_vs_k141_6542  full         | 4762  | No  | NA    | 0 | 2              | Low-quality     | Genome-fragment | 2.45  | 0     |
| S12_vs_k141_2282  1 2gene     | 1348  | No  | NA    | 0 | 0              | Not-determined  | Genome-fragment | NA    | 0     |
| S8_extracted_k141_55094       | 4766  | No  | NA    | 1 | 0              | Low-quality     | Genome-fragment | 9.42  | 0     |
| S8_extracted_k141_15348       | 4767  | No  | NA    | 0 | 2              | Low-quality     | Genome-fragment | 0.68  | 0     |
| S7_vs_54721  full             | 4769  | No  | NA    | 0 | 0              | Low-quality     | Genome-fragment | 10.17 | 0     |
| S12_vs_k141_97486  1 2gene    | 1604  | No  | NA    | 0 | 0              | Not-determined  | Genome-fragment | NA    | 0     |
| S6_extracted_k141_24820       | 4769  | Yes | 4024  | 1 | 1              | Low-quality     | Genome-fragment | 10.63 | 15.62 |
| S8_extracted_k141_137318      | 4769  | No  | NA    | 0 | 0              | Low-quality     | Genome-fragment | 0.41  | 0     |
| S9_vs_k141_1879  full         | 4770  | No  | NA    | 1 | 0              | Low-quality     | Genome-fragment | 7.41  | 0     |
| S12_vs_k141_94121  full       | 4772  | Yes | 2339  | 1 | 2              | Low-quality     | Genome-fragment | 4.1   | 50.98 |
| S12_vs_k141_58293  1 2gene    | 1476  | No  | NA    | 0 | 0              | Not-determined  | Genome-fragment | NA    | 0     |
| S12_vs_k141_152021  1 2gene   | 1078  | No  | NA    | 0 | 1              | Not-determined  | Genome-fragment | NA    | 0     |
| S14_vs_k141_98573  full       | 4772  | No  | NA    | 0 | 2              | Low-quality     | Genome-fragment | 6.76  | 0     |
| S12_vs_k141_16115  1 2gene    | 1596  | No  | NA    | 0 | 0              | Not-determined  | Genome-fragment | NA    | 0     |
| S10_vs_50624  full            | 4772  | No  | NA    | 3 | 0              | Low-quality     | Genome-fragment | 10.05 | 0     |
| S12_vs_k141_136966  1 2gene   | 1060  | No  | NA    | 0 | 0              | Not-determined  | Genome-fragment | NA    | 0     |
| S12_vs_k141_136988  1 2gene   | 1012  | No  | NA    | 0 | 2              | Not-determined  | Genome-fragment | NA    | 0     |
| S12_vs_k141_58634  1 2gene    | 1725  | No  | NA    | 0 | 1              | Not-determined  | Genome-fragment | NA    | 0     |
| S12_vs_k141_3591  1 2gene     | 1096  | No  | NA    | 0 | 2              | Not-determined  | Genome-fragment | NA    | 0     |
| S11_vs_k141_54203  full       | 4773  | No  | NA    | 3 | 0              | Low-quality     | Genome-fragment | 9.5   | 0     |
| S5_vs_k141_44025  0_partial   | 4774  | Yes | 2266  | 1 | 1              | Low-quality     | Genome-fragment | 1.99  | 52.53 |
| S5_vs_k141_79015  full        | 4775  | No  | NA    | 0 | 2              | Low-quality     | Genome-fragment | 4.7   | 0     |
| S3_vs_k141_1158  full         | 4776  | No  | NA    | 0 | 1              | Low-quality     | Genome-fragment | 8.15  | 0     |
| S7_vs_14593  full             | 4776  | No  | NA    | 2 | 0              | Low-quality     | Genome-fragment | 10.99 | 0     |
| S12_vs_k141_106113  1 2gene   | 1456  | No  | NA    | 0 |                |                 |                 |       |       |



|                           |          |      |    |    |                |                    |       |       |
|---------------------------|----------|------|----|----|----------------|--------------------|-------|-------|
| S2_extracted_k141_17460   | 4804 No  | NA   | 4  | 0  | Low-quality    | Genome-fragment    | 24.77 | 0     |
| S1_vs_k141_104031 full    | 4805 No  | NA   | 0  | 0  | Low-quality    | Genome-fragment    | 13.11 | 0     |
| S16_extracted_151669      | 4805 No  | NA   | 3  | 0  | Low-quality    | Genome-fragment    | 5.23  | 0     |
| S12_vs_k141_187277 H2gene | 1717 No  | NA   | 0  | 0  | Not-determined | Genome-fragment NA | 0     | 0     |
| S9_extracted_k141_23240   | 4806 No  | NA   | 1  | 0  | Low-quality    | Genome-fragment    | 10.71 | 0     |
| S16_vs_163365 full        | 4806 No  | NA   | 0  | 0  | Low-quality    | Genome-fragment    | 11.22 | 0     |
| S10_vs_2904 full          | 4806 No  | NA   | 0  | 2  | Low-quality    | Genome-fragment    | 3.11  | 0     |
| S17_vs_k141_136462 full   | 4807 No  | NA   | 7  | 0  | Low-quality    | Genome-fragment    | 7.77  | 0     |
| S17_vs_k141_168026 full   | 4809 No  | NA   | 3  | 1  | Low-quality    | Genome-fragment    | 2.64  | 0     |
| S10_vs_43165 full         | 4809 No  | NA   | 3  | 0  | Low-quality    | Genome-fragment    | 11.63 | 0     |
| S14_vs_k141_25370 full    | 4810 No  | NA   | 1  | 0  | Low-quality    | Genome-fragment    | 9.49  | 0     |
| S15_extracted_44153       | 4810 No  | NA   | 1  | 0  | Low-quality    | Genome-fragment    | 5.39  | 0     |
| S12_vs_k141_62047 H2gene  | 1218 No  | NA   | 0  | 0  | Not-determined | Genome-fragment NA | 0     | 0     |
| S12_vs_k141_46946 H2gene  | 1093 No  | NA   | 0  | 0  | Not-determined | Genome-fragment NA | 0     | 0     |
| S1_extracted_k141_99185   | 4811 No  | NA   | 2  | 0  | Low-quality    | Genome-fragment    | 15.88 | 0     |
| S1_extracted_k141_112408  | 4811 No  | NA   | 3  | 0  | Low-quality    | Genome-fragment    | 10.32 | 0     |
| S7_vs_55853 full          | 4811 No  | NA   | 0  | 0  | Low-quality    | Genome-fragment    | 11.4  | 0     |
| S3_extracted_k141_2120    | 4812 No  | NA   | 0  | 0  | Low-quality    | Genome-fragment    | 2.41  | 0     |
| S9_vs_k141_35095 full     | 4812 No  | NA   | 1  | 0  | Low-quality    | Genome-fragment    | 12.74 | 0     |
| S7_vs_8054 full           | 4813 No  | NA   | 0  | 0  | Low-quality    | Genome-fragment    | 12.67 | 0     |
| S3_vs_k141_36613 full     | 4814 No  | NA   | 0  | 3  | Low-quality    | Genome-fragment    | 2.98  | 0     |
| S12_vs_k141_107726 full   | 4814 No  | NA   | 0  | 1  | Low-quality    | Genome-fragment    | 2.99  | 0     |
| S1_extracted_k141_108007  | 4815 No  | NA   | 3  | 0  | Low-quality    | Genome-fragment    | 10.55 | 0     |
| S12_vs_k141_173024 H2gene | 1244 No  | NA   | 0  | 0  | Not-determined | Genome-fragment NA | 0     | 0     |
| S15_extracted_122         | 1367 No  | NA   | 0  | 2  | Not-determined | Genome-fragment NA | 0     | 0     |
| S15_extracted_574         | 1168 No  | NA   | 0  | 1  | Not-determined | Genome-fragment NA | 0     | 0     |
| S16_vs_162316 full        | 4815 Yes | 2954 | 1  | 1  | Low-quality    | Genome-fragment    | 3.5   | 38.65 |
| S15_extracted_717         | 3200 No  | NA   | 0  | 1  | Not-determined | Genome-fragment NA | 0     | 0     |
| S15_extracted_727         | 12556 No | NA   | 3  | 2  | Not-determined | Genome-fragment NA | 0     | 0     |
| S10_vs_35960 full         | 4817 No  | NA   | 0  | 3  | Low-quality    | Genome-fragment    | 2.36  | 0     |
| S9_vs_k141_87586 full     | 4819 No  | NA   | 4  | 0  | Low-quality    | Genome-fragment    | 12.67 | 0     |
| S15_extracted_1092        | 2123 No  | NA   | 2  | 2  | Not-determined | Genome-fragment NA | 0     | 0     |
| S15_extracted_1190        | 2261 No  | NA   | 0  | 1  | Not-determined | Genome-fragment NA | 0     | 0     |
| S1_vs_k141_69623 full     | 4819 No  | NA   | 2  | 0  | Low-quality    | Genome-fragment    | 12.2  | 0     |
| S15_extracted_1310        | 1154 No  | NA   | 0  | 0  | Not-determined | Genome-fragment NA | 0     | 0     |
| S15_extracted_1582        | 3255 No  | NA   | 2  | 2  | Not-determined | Genome-fragment NA | 0     | 0     |
| S15_extracted_1856        | 2048 No  | NA   | 0  | 0  | Not-determined | Genome-fragment NA | 0     | 0     |
| S15_extracted_2032        | 68670 No | NA   | 18 | 0  | Complete       | High-quality       | 100   | 0     |
| S15_extracted_2087        | 1230 No  | NA   | 0  | 0  | Not-determined | Genome-fragment NA | 0     | 0     |
| S15_extracted_2109        | 1126 No  | NA   | 0  | 1  | Not-determined | Genome-fragment NA | 0     | 0     |
| S15_extracted_2305        | 1066 No  | NA   | 0  | 1  | Not-determined | Genome-fragment NA | 0     | 0     |
| S15_extracted_2351        | 3842 No  | NA   | 4  | 2  | Not-determined | Genome-fragment NA | 0     | 0     |
| S15_extracted_2372        | 5298 No  | NA   | 0  | 3  | Not-determined | Genome-fragment NA | 0     | 0     |
| S15_extracted_2382        | 1574 No  | NA   | 0  | 2  | Not-determined | Genome-fragment NA | 0     | 0     |
| S15_extracted_2405        | 1059 No  | NA   | 0  | 0  | Not-determined | Genome-fragment NA | 0     | 0     |
| S15_extracted_2513        | 57304 No | NA   | 15 | 0  | High-quality   | High-quality       | 100   | 0     |
| S11_extracted_k141_70294  | 4820 No  | NA   | 1  | 0  | Low-quality    | Genome-fragment    | 13.08 | 0     |
| S3_vs_k141_11555 full     | 4820 No  | NA   | 3  | 0  | Low-quality    | Genome-fragment    | 12.82 | 0     |
| S16_vs_112306 full        | 4820 No  | NA   | 0  | 0  | Low-quality    | Genome-fragment    | 2.82  | 0     |
| S15_extracted_2934        | 7630 No  | NA   | 0  | 2  | Not-determined | Genome-fragment NA | 0     | 0     |
| S15_extracted_3006        | 1437 No  | NA   | 0  | 2  | Not-determined | Genome-fragment NA | 0     | 0     |
| S5_vs_k141_5159 full      | 4822 No  | NA   | 0  | 0  | Low-quality    | Genome-fragment    | 12.69 | 0     |
| S15_extracted_3251        | 1098 No  | NA   | 2  | 0  | Not-determined | Genome-fragment NA | 0     | 0     |
| S3_vs_k141_37457 full     | 4824 No  | NA   | 3  | 0  | Low-quality    | Genome-fragment    | 3.3   | 0     |
| S15_extracted_3462        | 1184 No  | NA   | 0  | 2  | Not-determined | Genome-fragment NA | 0     | 0     |
| S15_extracted_3506        | 4267 No  | NA   | 0  | 3  | Not-determined | Genome-fragment NA | 0     | 0     |
| S15_extracted_3757        | 3182 No  | NA   | 0  | 0  | Not-determined | Genome-fragment NA | 0     | 0     |
| S15_extracted_3831        | 13430 No | NA   | 0  | 0  | Not-determined | Genome-fragment NA | 0     | 0     |
| S15_extracted_3887        | 1117 No  | NA   | 0  | 0  | Not-determined | Genome-fragment NA | 0     | 0     |
| S13_extracted_30032       | 4825 No  | NA   | 0  | 2  | Low-quality    | Genome-fragment    | 5.11  | 0     |
| S15_extracted_4196        | 1921 No  | NA   | 0  | 1  | Not-determined | Genome-fragment NA | 0     | 0     |
| S15_extracted_4257        | 1587 No  | NA   | 0  | 1  | Not-determined | Genome-fragment NA | 0     | 0     |
| S15_extracted_4490        | 3013 No  | NA   | 0  | 1  | Not-determined | Genome-fragment NA | 0     | 0     |
| S15_extracted_4601        | 1074 No  | NA   | 0  | 0  | Not-determined | Genome-fragment NA | 0     | 0     |
| S15_extracted_4680        | 3914 No  | NA   | 4  | 4  | Not-determined | Genome-fragment NA | 0     | 0     |
| S15_extracted_4941        | 1369 No  | NA   | 0  | 2  | Not-determined | Genome-fragment NA | 0     | 0     |
| S15_extracted_5029        | 6015 No  | NA   | 0  | 1  | Not-determined | Genome-fragment NA | 0     | 0     |
| S15_extracted_5199        | 1768 No  | NA   | 0  | 1  | Not-determined | Genome-fragment NA | 0     | 0     |
| S15_extracted_5498        | 2467 No  | NA   | 0  | 1  | Not-determined | Genome-fragment NA | 0     | 0     |
| S9_vs_k141_59377 full     | 4827 No  | NA   | 0  | 1  | Low-quality    | Genome-fragment    | 8.11  | 0     |
| S15_extracted_5756        | 1827 No  | NA   | 0  | 1  | Not-determined | Genome-fragment NA | 0     | 0     |
| S15_extracted_5759        | 1071 No  | NA   | 0  | 1  | Not-determined | Genome-fragment NA | 0     | 0     |
| S15_extracted_5820        | 1140 No  | NA   | 0  | 0  | Not-determined | Genome-fragment NA | 0     | 0     |
| S15_extracted_6013        | 1070 No  | NA   | 0  | 1  | Not-determined | Genome-fragment NA | 0     | 0     |
| S15_extracted_6026        | 1955 No  | NA   | 0  | 0  | Not-determined | Genome-fragment NA | 0     | 0     |
| S15_extracted_6140        | 1458 No  | NA   | 0  | 1  | Not-determined | Genome-fragment NA | 0     | 0     |
| S15_extracted_6318        | 1457 No  | NA   | 0  | 1  | Not-determined | Genome-fragment NA | 0     | 0     |
| S15_extracted_6420        | 7131 No  | NA   | 0  | 3  | Not-determined | Genome-fragment NA | 0     | 0     |
| S8_extracted_k141_115480  | 4828 No  | NA   | 0  | 0  | Low-quality    | Genome-fragment    | 2.21  | 0     |
| S15_extracted_6515        | 1179 No  | NA   | 0  | 0  | Not-determined | Genome-fragment NA | 0     | 0     |
| S8_extracted_k141_200280  | 4830 No  | NA   | 0  | 7  | Low-quality    | Genome-fragment    | 3.17  | 0     |
| S15_extracted_6850        | 3200 No  | NA   | 0  | 1  | Not-determined | Genome-fragment NA | 0     | 0     |
| S7_extracted_16529        | 4831 No  | NA   | 2  | 0  | Low-quality    | Genome-fragment    | 3.15  | 0     |
| S15_extracted_7165        | 1021 No  | NA   | 0  | 0  | Not-determined | Genome-fragment NA | 0     | 0     |
| S15_extracted_7200        | 6990 No  | NA   | 0  | 2  | Not-determined | Genome-fragment NA | 0     | 0     |
| S10_vs_22040 full         | 4831 No  | NA   | 0  | 4  | Low-quality    | Genome-fragment    | 2.21  | 0     |
| S6_extracted_k141_18125   | 4831 No  | NA   | 2  | 0  | Low-quality    | Genome-fragment    | 2.88  | 0     |
| S15_extracted_7539        | 1846 No  | NA   | 0  | 0  | Not-determined | Genome-fragment NA | 0     | 0     |
| S15_extracted_7594        | 1770 No  | NA   | 0  | 2  | Not-determined | Genome-fragment NA | 0     | 0     |
| S15_extracted_7731        | 1241 No  | NA   | 0  | 1  | Not-determined | Genome-fragment NA | 0     | 0     |
| S15_extracted_7738        | 4940 No  | NA   | 0  | 2  | Not-determined | Genome-fragment NA | 0     | 0     |
| S16_extracted_18946       | 4832 No  | NA   | 0  | 0  | Low-quality    | Genome-fragment    | 13.47 | 0     |
| S15_extracted_7910        | 1189 No  | NA   | 0  | 1  | Not-determined | Genome-fragment NA | 0     | 0     |
| S15_extracted_64881       | 4832 No  | NA   | 0  | 0  | Low-quality    | Genome-fragment    | 5     | 0     |
| S15_extracted_8095        | 1241 No  | NA   | 1  | 1  | Not-determined | Genome-fragment NA | 0     | 0     |
| S15_extracted_8112        | 1037 No  | NA   | 0  | 0  | Not-determined | Genome-fragment NA | 0     | 0     |
| S15_extracted_8398        | 2071 No  | NA   | 0  | 1  | Not-determined | Genome-fragment NA | 0     | 0     |
| S5_vs_k141_8636 full      | 4833 No  | NA   | 3  | 0  | Low-quality    | Genome-fragment    | 13.01 | 0     |
| S15_extracted_8548        | 4759 No  | NA   | 1  | 1  | Not-determined | Genome-fragment NA | 0     | 0     |
| S15_extracted_8609        | 1371 No  | NA   | 0  | 1  | Not-determined | Genome-fragment NA | 0     | 0     |
| S15_extracted_8846        | 3593 No  | NA   | 0  | 2  | Not-determined | Genome-fragment NA | 0     | 0     |
| S15_extracted_8939        | 1695 No  | NA   | 0  | 1  | Not-determined | Genome-fragment NA | 0     | 0     |
| S15_extracted_8946        | 5739 No  | NA   | 0  | 0  | Not-determined | Genome-fragment NA | 0     | 0     |
| S15_extracted_8987        | 1632 No  | NA   | 0  | 1  | Not-determined | Genome-fragment NA | 0     | 0     |
| S10_extracted_78919       | 4834 No  | NA   | 0  | 0  | Low-quality    | Genome-fragment    | 11.11 | 0     |
| S15_extracted_9416        | 1212 No  | NA   | 0  | 2  | Not-determined | Genome-fragment NA | 0     | 0     |
| S12_extracted_k141_2130   | 4834 No  | NA   | 2  | 0  | Low-quality    | Genome-fragment    | 10.67 | 0     |
| S15_extracted_9555        | 3896 No  | NA   | 0  | 0  | Not-determined | Genome-fragment NA | 0     | 0     |
| S2_extracted_k141_10854   | 4835 No  | NA   | 0  | 0  | Low-quality    | Genome-fragment    | 8.17  | 0     |
| S15_extracted_9726        | 1449 No  | NA   | 0  | 0  | Not-determined | Genome-fragment NA | 0     | 0     |
| S15_extracted_9757        | 1092 No  | NA   | 0  | 0  | Not-determined | Genome-fragment NA | 0     | 0     |
| S11_extracted_k141_17217  | 4836 No  | NA   | 0  | 1  | Low-quality    | Genome-fragment    | 8.23  | 0     |
| S15_extracted_9793        | 1509 No  | NA   | 0  | 0  | Not-determined | Genome-fragment NA | 0     | 0     |
| S15_extracted_9853        | 1106 No  | NA   | 0  | 1  | Not-determined | Genome-fragment NA | 0     | 0     |
| S15_extracted_9996        | 1883 No  | NA   | 0  | 0  | Not-determined | Genome-fragment NA | 0     | 0     |
| S15_extracted_10140       | 1011 No  | NA   | 0  | 0  | Not-determined | Genome-fragment NA | 0     | 0     |
| S15_extracted_10245       | 4273 No  | NA   | 0  | 0  | Not-determined | Genome-fragment NA | 0     | 0     |
| S15_extracted_10792       | 1078 No  | NA   | 0  | 2  | Not-determined | Genome-fragment NA | 0     | 0     |
| S15_extracted_10850       | 1010 No  | NA   | 0  | 0  | Not-determined | Genome-fragment NA | 0     | 0     |
| S15_extracted_10878       | 3054 No  | NA   | 0  | 1  | Not-determined | Genome-fragment NA | 0     | 0     |
| S15_extracted_11038       | 1222 No  | NA   | 0  | 1  | Not-determined | Genome-fragment NA | 0     | 0     |
| S15_extracted_11206       | 1219 No  | NA   | 0  | 0  | Not-determined | Genome-fragment NA | 0     | 0     |
| S3_extracted_k141_84742   | 4837 No  | NA   | 1  | 1  | Low-quality    | Genome-fragment    | 8.88  | 0     |
| S8_vs_k141_5855 full      | 4838 No  | NA   | 2  | 0  | Low-quality    | Genome-fragment    | 12.36 | 0     |
| S15_extracted_11617       | 1027 No  | NA   | 0  | 0  | Not-determined | Genome-fragment NA | 0     | 0     |
| S16_extracted_160954      | 4842 No  | NA   | 1  | 0  | Low-quality    | Genome-fragment    | 11.78 | 0     |
| S15_extracted_11843       | 1202 No  | NA   | 0  | 1  | Not-determined | Genome-fragment NA | 0     | 0     |
| S15_extracted_11943       | 1329 No  | NA   | 0  | 0  | Not-determined | Genome-fragment NA | 0     | 0     |
| S15_extracted_12153       | 1126 No  | NA   | 0  | 1  | Not-determined | Genome-fragment NA | 0     | 0     |
| S15_extracted_12169       | 1692 No  | NA   | 0  | 2  | Not-determined | Genome-fragment NA | 0     | 0     |
| S4_extracted_26647        | 4842 No  | NA   | 3  | 0  | Low-quality    | Genome-fragment    | 10.46 | 0     |
| S15_extracted_12193       | 4109 No  | NA   | 2  | 0  | Not-determined | Genome-fragment NA | 0     | 0     |
| S3_vs_k141_111819 full    | 4844 No  | NA   | 1  | 0  | Low-quality    | Genome-fragment    | 11.36 | 0     |
| S15_extracted_12566       | 1220 No  | NA   | 0  | 1  | Not-determined | Genome-fragment NA | 0     | 0     |
| S15_extracted_13089       | 1683 No  | NA   | 0  | 1  | Not-determined | Genome-fragment NA | 0     | 0     |
| S5_vs_k141_43645 full     | 4844 No  | NA   | 0  | 0  | Low-quality    | Genome-fragment    | 8.3   | 0     |
| S15_extracted_13238       | 1101 No  | NA   | 0  | 0  | Not-determined | Genome-fragment NA | 0     | 0     |
| S15_extracted_13362       | 1045 No  | NA   | 0  | 1  | Not-determined | Genome-fragment NA | 0     | 0     |
| S4_extracted_17164        | 4844 No  | NA   | 2  | 0  | Low-quality    | Genome-fragment    | 10.75 | 0     |
| S15_extracted_13647       | 3325 No  | NA   | 0  | 2  | Not-determined | Genome-fragment NA | 0     | 0     |
| S15_extracted_13761       | 1035 No  | NA   | 0  | 0  | Not-determined | Genome-fragment NA | 0     | 0     |
| S15_extracted_13767       | 1581 No  | NA   | 0  | 2  | Not-determined | Genome-fragment NA | 0     | 0     |
| S6_vs_k141_25241 full     | 4845 Yes | 3834 | 1  | 1  | Low-quality    | Genome-fragment    | 7.17  | 20.87 |
| S15_extracted_13818       | 1123 No  | NA   | 0  | 0  | Not-determined | Genome-fragment NA | 0     | 0     |
| S8_extracted_k141_139315  | 4845 No  | NA   | 0  | 0  | Low-quality    | Genome-fragment    | 10.94 | 0     |
| S15_extracted_13994       | 1084 No  | NA   | 0  | 1  | Not-determined | Genome-fragment NA | 0     | 0     |
| S15_extracted_14042       | 12121 No | NA   | 0  | 11 | Not-determined | Genome-fragment NA | 0     | 0     |
| S15_extracted_14080       | 1379 No  | NA   | 0  | 2  | Not-determined | Genome-fragment NA | 0     | 0     |
| S14_vs_k141_52977 full    | 4846 No  | NA   | 0  | 1  | Low-quality    | Genome-fragment    | 8.21  | 0     |
| S14_vs_k141_98404 full    | 4846 No  | NA   | 1  | 0  | Low-quality    | Genome-fragment    | 3.05  | 0     |
| S15_extracted_14350       | 1222 No  | NA   | 0  | 1  | Not-determined | Genome-fragment NA | 0     | 0     |
| S15_extracted_14407       | 1022 No  | NA   | 0  | 0  | Not-determined | Genome-fragment NA | 0     | 0     |
| S15_extracted_14419       | 1631 No  | NA   | 0  | 1  | Not-determined | Genome-fragment NA | 0     | 0     |
| S3_extracted_k141_61114   | 4848 No  | NA   | 0  | 1  | Low-quality    | Genome-fragment    | 40.78 | 0     |
| S15_extracted_14746       | 1747 No  | NA   | 0  | 1  | Not-determined | Genome-fragment NA | 0     | 0     |
| S15_extracted_14766       | 1042 No  | NA   | 0  | 0  | Not-determined | Genome-fragment NA | 0</   |       |



|                           |        |    |    |      |    |                |                 |       |       |
|---------------------------|--------|----|----|------|----|----------------|-----------------|-------|-------|
| S3_vs_k141_106599  full   | 4853   | No | NA | 0    | 1  | Low-quality    | Genome-fragment | 1.51  | 0     |
| S15_extracted_18038       | 1573   | No | NA | 0    | 1  | Not-determined | Genome-fragment | NA    | 0     |
| S10_extracted_5660        | 4853   | No | NA | 0    | 3  | Low-quality    | Genome-fragment | 6.8   | 0     |
| S15_extracted_18129       | 1330   | No | NA | 0    | 1  | Not-determined | Genome-fragment | NA    | 0     |
| S4_extracted_10831        | 4855   | No | NA | 1    | 0  | Low-quality    | Genome-fragment | 8.39  | 0     |
| S15_extracted_18428       | 1212   | No | NA | 0    | 1  | Not-determined | Genome-fragment | NA    | 0     |
| S15_extracted_18435       | 1151   | No | NA | 0    | 0  | Not-determined | Genome-fragment | NA    | 0     |
| S4_extracted_13917        | 4855   | No | NA | 0    | 0  | Low-quality    | Genome-fragment | 5.07  | 0     |
| S15_extracted_18805       | 1403   | No | NA | 0    | 2  | Not-determined | Genome-fragment | NA    | 0     |
| S15_extracted_18870       | 1009   | No | NA | 0    | 1  | Not-determined | Genome-fragment | NA    | 0     |
| S16_vs_15807  full        | 4857   | No | NA | 0    | 0  | Low-quality    | Genome-fragment | 3.29  | 0     |
| S15_extracted_19283       | 1167   | No | NA | 0    | 1  | Not-determined | Genome-fragment | NA    | 0     |
| S15_extracted_19287       | 1029   | No | NA | 0    | 1  | Not-determined | Genome-fragment | NA    | 0     |
| S15_extracted_19367       | 1078   | No | NA | 0    | 1  | Not-determined | Genome-fragment | NA    | 0     |
| S15_extracted_19421       | 4626   | No | NA | 0    | 0  | Not-determined | Genome-fragment | NA    | 0     |
| S15_extracted_19523       | 1009   | No | NA | 0    | 1  | Not-determined | Genome-fragment | NA    | 0     |
| S15_extracted_19609       | 1184   | No | NA | 0    | 1  | Not-determined | Genome-fragment | NA    | 0     |
| S15_extracted_20382       | 5410   | No | NA | 0    | 4  | Not-determined | Genome-fragment | NA    | 0     |
| S15_extracted_20644       | 7736   | No | NA | 12   | 0  | High-quality   | High-quality    | 98.07 | 0     |
| S15_extracted_20676       | 2559   | No | NA | 0    | 0  | Not-determined | Genome-fragment | NA    | 0     |
| S15_extracted_20743       | 1030   | No | NA | 0    | 0  | Not-determined | Genome-fragment | NA    | 0     |
| S15_extracted_21275       | 24533  | No | NA | 0    | 4  | Not-determined | Genome-fragment | NA    | 0     |
| S15_extracted_21343       | 1383   | No | NA | 0    | 1  | Not-determined | Genome-fragment | NA    | 0     |
| S15_extracted_21708       | 1022   | No | NA | 0    | 0  | Not-determined | Genome-fragment | NA    | 0     |
| S15_extracted_21873       | 4198   | No | NA | 0    | 0  | Not-determined | Genome-fragment | NA    | 0     |
| S15_extracted_21889       | 1993   | No | NA | 0    | 1  | Not-determined | Genome-fragment | NA    | 0     |
| S15_extracted_21957       | 2308   | No | NA | 0    | 2  | Not-determined | Genome-fragment | NA    | 0     |
| S15_extracted_22101       | 5915   | No | NA | 0    | 2  | Not-determined | Genome-fragment | NA    | 0     |
| S15_extracted_22117       | 1075   | No | NA | 0    | 1  | Not-determined | Genome-fragment | NA    | 0     |
| S15_extracted_22228       | 2778   | No | NA | 0    | 1  | Not-determined | Genome-fragment | NA    | 0     |
| S17_vs_k141_57230  full   | 4859   | No | NA | 0    | 0  | Low-quality    | Genome-fragment | 9.75  | 0     |
| S1_extracted_k141_131846  | 4861   | No | NA | 2    | 0  | Low-quality    | Genome-fragment | 34.02 | 0     |
| S15_extracted_22453       | 1010   | No | NA | 0    | 1  | Not-determined | Genome-fragment | NA    | 0     |
| S15_extracted_22456       | 5352   | No | NA | 0    | 2  | Not-determined | Genome-fragment | NA    | 0     |
| S7_vs_37855  full         | 4861   | No | NA | 0    | 3  | Low-quality    | Genome-fragment | 4.7   | 0     |
| S15_extracted_22510       | 1409   | No | NA | 0    | 2  | Not-determined | Genome-fragment | NA    | 0     |
| S15_extracted_22581       | 3061   | No | NA | 0    | 2  | Not-determined | Genome-fragment | NA    | 0     |
| S15_extracted_22654       | 1093   | No | NA | 0    | 1  | Not-determined | Genome-fragment | NA    | 0     |
| S15_extracted_22659       | 1409   | No | NA | 0    | 0  | Not-determined | Genome-fragment | NA    | 0     |
| S15_extracted_22930       | 1051   | No | NA | 0    | 1  | Not-determined | Genome-fragment | NA    | 0     |
| S15_extracted_22951       | 3096   | No | NA | 0    | 2  | Not-determined | Genome-fragment | NA    | 0     |
| S15_extracted_23049       | 1047   | No | NA | 0    | 1  | Not-determined | Genome-fragment | NA    | 0     |
| S15_extracted_23059       | 6843   | No | NA | 0    | 1  | Not-determined | Genome-fragment | NA    | 0     |
| S15_extracted_23080       | 1252   | No | NA | 0    | 1  | Not-determined | Genome-fragment | NA    | 0     |
| S15_extracted_23087       | 1335   | No | NA | 0    | 1  | Not-determined | Genome-fragment | NA    | 0     |
| S6_vs_k141_17095  full    | 4861   | No | NA | 0    | 3  | Low-quality    | Genome-fragment | 1.52  | 0     |
| S15_extracted_23563       | 1112   | No | NA | 0    | 1  | Not-determined | Genome-fragment | NA    | 0     |
| S15_extracted_23603       | 1332   | No | NA | 0    | 1  | Not-determined | Genome-fragment | NA    | 0     |
| S15_extracted_23684       | 4085   | No | NA | 0    | 3  | Not-determined | Genome-fragment | NA    | 0     |
| S8_vs_k141_196500  full   | 4862   | No | NA | 0    | 3  | Low-quality    | Genome-fragment | 5.65  | 0     |
| S17_vs_k141_160991  full  | 4864   | No | NA | 0    | 3  | Low-quality    | Genome-fragment | 2.95  | 0     |
| S15_extracted_24129       | 1261   | No | NA | 0    | 1  | Not-determined | Genome-fragment | NA    | 0     |
| S15_extracted_24299       | 1580   | No | NA | 0    | 2  | Not-determined | Genome-fragment | NA    | 0     |
| S15_extracted_24400       | 3565   | No | NA | 0    | 3  | Not-determined | Genome-fragment | NA    | 0     |
| S14_vs_k141_7962  full    | 4864   | No | NA | 0    | 0  | Low-quality    | Genome-fragment | 14.35 | 0     |
| S15_extracted_24828       | 1386   | No | NA | 2    | 2  | Not-determined | Genome-fragment | NA    | 0     |
| S10_vs_84284  full        | 4865   | No | NA | 0    | 3  | Low-quality    | Genome-fragment | 10.47 | 0     |
| S12_extracted_k141_168367 | 4865   | No | NA | 2    | 0  | Low-quality    | Genome-fragment | 12.84 | 0     |
| S15_extracted_25490       | 1434   | No | NA | 0    | 1  | Not-determined | Genome-fragment | NA    | 0     |
| S8_extracted_k141_63628   | 4866   | No | NA | 5    | 0  | Low-quality    | Genome-fragment | 8.13  | 0     |
| S15_extracted_25573       | 1216   | No | NA | 0    | 2  | Not-determined | Genome-fragment | NA    | 0     |
| S11_extracted_k141_28106  | 4868   | No | NA | 0    | 0  | Low-quality    | Genome-fragment | 13.99 | 0     |
| S15_extracted_26460       | 4611   | No | NA | 0    | 1  | Not-determined | Genome-fragment | NA    | 0     |
| S13_extracted_10602       | 4868   | No | NA | 5    | 0  | Low-quality    | Genome-fragment | 10.52 | 0     |
| S15_extracted_26800       | 3863   | No | NA | 0    | 0  | Not-determined | Genome-fragment | NA    | 0     |
| S15_extracted_26848       | 1070   | No | NA | 0    | 0  | Not-determined | Genome-fragment | NA    | 0     |
| S15_extracted_27002       | 17881  | No | NA | 0    | 2  | Not-determined | Genome-fragment | NA    | 0     |
| S15_extracted_27062       | 1431   | No | NA | 0    | 1  | Not-determined | Genome-fragment | NA    | 0     |
| S15_extracted_27117       | 1289   | No | NA | 0    | 1  | Not-determined | Genome-fragment | NA    | 0     |
| S15_extracted_27146       | 4466   | No | NA | 0    | 4  | Not-determined | Genome-fragment | NA    | 0     |
| S8_extracted_k141_198830  | 4868   | No | NA | 0    | 2  | Low-quality    | Genome-fragment | 2.26  | 0     |
| S15_extracted_27298       | 1526   | No | NA | 0    | 2  | Not-determined | Genome-fragment | NA    | 0     |
| S15_extracted_27339       | 1064   | No | NA | 0    | 0  | Not-determined | Genome-fragment | NA    | 0     |
| S15_extracted_27465       | 1789   | No | NA | 0    | 0  | Not-determined | Genome-fragment | NA    | 0     |
| S15_extracted_27535       | 1967   | No | NA | 0    | 2  | Not-determined | Genome-fragment | NA    | 0     |
| S15_extracted_27973       | 3297   | No | NA | 0    | 0  | Not-determined | Genome-fragment | NA    | 0     |
| S15_extracted_28168       | 3194   | No | NA | 0    | 1  | Not-determined | Genome-fragment | NA    | 0     |
| S17_extracted_k141_122512 | 4870   | No | NA | 1    | 0  | Low-quality    | Genome-fragment | 10.35 | 0     |
| S15_extracted_28860       | 1312   | No | NA | 0    | 1  | Not-determined | Genome-fragment | NA    | 0     |
| S5_vs_k141_24639  full    | 4870   | No | NA | 1    | 0  | Low-quality    | Genome-fragment | 10.63 | 0     |
| S7_vs_88046  full         | 4874   | No | NA | 1    | 0  | Low-quality    | Genome-fragment | 2.98  | 0     |
| S10_extracted_90211       | 4874   | No | NA | 0    | 0  | Low-quality    | Genome-fragment | 10.67 | 0     |
| S10_vs_10935  full        | 4874   | No | NA | 2    | 0  | Low-quality    | Genome-fragment | 9.77  | 0     |
| S15_extracted_29642       | 1010   | No | NA | 0    | 0  | Not-determined | Genome-fragment | NA    | 0     |
| S15_extracted_29839       | 1311   | No | NA | 0    | 0  | Not-determined | Genome-fragment | NA    | 0     |
| S15_extracted_29849       | 1752   | No | NA | 0    | 2  | Not-determined | Genome-fragment | NA    | 0     |
| S15_extracted_30264       | 1213   | No | NA | 0    | 1  | Not-determined | Genome-fragment | NA    | 0     |
| S8_vs_k141_200984  full   | 4874   | No | NA | 2    | 0  | Low-quality    | Genome-fragment | 13.04 | 0     |
| S15_extracted_30351       | 1257   | No | NA | 0    | 1  | Not-determined | Genome-fragment | NA    | 0     |
| S15_extracted_30496       | 1397   | No | NA | 0    | 0  | Not-determined | Genome-fragment | NA    | 0     |
| S11_extracted_k141_36063  | 4875   | No | NA | 1    | 0  | Low-quality    | Genome-fragment | 1.25  | 0     |
| S15_extracted_30577       | 2618   | No | NA | 0    | 3  | Not-determined | Genome-fragment | NA    | 0     |
| S15_extracted_30676       | 4214   | No | NA | 0    | 0  | Not-determined | Genome-fragment | NA    | 0     |
| S15_extracted_30989       | 1132   | No | NA | 0    | 0  | Not-determined | Genome-fragment | NA    | 0     |
| S15_extracted_31096       | 1544   | No | NA | 0    | 0  | Not-determined | Genome-fragment | NA    | 0     |
| S15_extracted_31260       | 2552   | No | NA | 0    | 2  | Not-determined | Genome-fragment | NA    | 0     |
| S3_extracted_k141_18842   | 4875   | No | NA | 0    | 0  | Low-quality    | Genome-fragment | 3.12  | 0     |
| S15_extracted_32052       | 1484   | No | NA | 0    | 1  | Not-determined | Genome-fragment | NA    | 0     |
| S15_extracted_32123       | 1047   | No | NA | 0    | 1  | Not-determined | Genome-fragment | NA    | 0     |
| S15_extracted_32402       | 5603   | No | NA | 0    | 0  | Not-determined | Genome-fragment | NA    | 0     |
| S15_extracted_32406       | 1327   | No | NA | 0    | 2  | Not-determined | Genome-fragment | NA    | 0     |
| S15_extracted_32646       | 2224   | No | NA | 0    | 1  | Not-determined | Genome-fragment | NA    | 0     |
| S15_extracted_32681       | 5100   | No | NA | 0    | 2  | Not-determined | Genome-fragment | NA    | 0     |
| S13_vs_7448  full         | 4876   | No | NA | 2    | 0  | Low-quality    | Genome-fragment | 33.48 | 0     |
| S15_extracted_32884       | 1683   | No | NA | 0    | 0  | Not-determined | Genome-fragment | NA    | 0     |
| S16_extracted_44264       | 4876   | No | NA | 4    | 0  | Low-quality    | Genome-fragment | 8.09  | 0     |
| S15_extracted_33178       | 1267   | No | NA | 0    | 1  | Not-determined | Genome-fragment | NA    | 0     |
| S15_extracted_33201       | 3203   | No | NA | 0    | 2  | Not-determined | Genome-fragment | NA    | 0     |
| S15_extracted_33256       | 1783   | No | NA | 0    | 1  | Not-determined | Genome-fragment | NA    | 0     |
| S17_extracted_k141_164667 | 4877   | No | NA | 1    | 0  | Low-quality    | Genome-fragment | 7.56  | 0     |
| S11_vs_k141_29773  full   | 4877   | No | NA | 1    | 1  | Low-quality    | Genome-fragment | 4.03  | 47.92 |
| S15_extracted_33505       | 174703 | No | NA | 2540 | 27 | High-quality   | High-quality    | 100   | 0     |
| S15_extracted_33560       | 2075   | No | NA | 0    | 2  | Not-determined | Genome-fragment | NA    | 0     |
| S7_vs_48009  full         | 4877   | No | NA | 0    | 4  | Low-quality    | Genome-fragment | 2.62  | 0     |
| S15_extracted_33683       | 1128   | No | NA | 0    | 2  | Not-determined | Genome-fragment | NA    | 0     |
| S15_extracted_33973       | 4470   | No | NA | 0    | 0  | Not-determined | Genome-fragment | NA    | 0     |
| S15_extracted_34027       | 1212   | No | NA | 0    | 2  | Not-determined | Genome-fragment | NA    | 0     |
| S15_extracted_34325       | 1373   | No | NA | 0    | 0  | Not-determined | Genome-fragment | NA    | 0     |
| S12_vs_k141_64716  full   | 4877   | No | NA | 2    | 0  | Low-quality    | Genome-fragment | 10.18 | 0     |
| S15_extracted_34492       | 1022   | No | NA | 0    | 0  | Not-determined | Genome-fragment | NA    | 0     |
| S7_extracted_36455        | 4878   | No | NA | 1    | 1  | Low-quality    | Genome-fragment | 8.35  | 0     |
| S15_extracted_34567       | 1456   | No | NA | 0    | 2  | Not-determined | Genome-fragment | NA    | 0     |
| S15_extracted_34577       | 1286   | No | NA | 0    | 0  | Not-determined | Genome-fragment | NA    | 0     |
| S15_extracted_34860       | 2769   | No | NA | 0    | 1  | Not-determined | Genome-fragment | NA    | 0     |
| S16_extracted_45751       | 4878   | No | NA | 0    | 1  | Low-quality    | Genome-fragment | 7.68  | 0     |
| S15_extracted_35004       | 1182   | No | NA | 0    | 0  | Not-determined | Genome-fragment | NA    | 0     |
| S3_extracted_k141_36439   | 4879   | No | NA | 5    | 0  | Low-quality    | Genome-fragment | 22.23 | 0     |
| S15_extracted_35168       | 3169   | No | NA | 0    | 1  | Not-determined | Genome-fragment | NA    | 0     |
| S15_extracted_35632       | 1458   | No | NA | 0    | 1  | Not-determined | Genome-fragment | NA    | 0     |
| S16_extracted_125248      | 4879   | No | NA | 0    | 0  | Low-quality    | Genome-fragment | 4.59  | 0     |
| S1_vs_k141_132183  full   | 4880   | No | NA | 3    | 0  | Low-quality    | Genome-fragment | 11.46 | 0     |
| S15_extracted_36065       | 1009   | No | NA | 0    | 1  | Not-determined | Genome-fragment | NA    | 0     |
| S15_extracted_36110       | 1996   | No | NA | 0    | 2  | Not-determined | Genome-fragment | NA    | 0     |
| S15_extracted_36165       | 3091   | No | NA | 0    | 2  | Not-determined | Genome-fragment | NA    | 0     |
| S15_extracted_36274       | 1008   | No | NA | 0    | 1  | Not-determined | Genome-fragment | NA    | 0     |
| S15_extracted_36291       | 1132   | No | NA | 0    | 1  | Not-determined | Genome-fragment | NA    | 0     |
| S15_extracted_36361       | 1439   | No | NA | 0    | 1  | Not-determined | Genome-fragment | NA    | 0     |
| S15_extracted_36411       | 1018   | No | NA | 0    | 0  | Not-determined | Genome-fragment | NA    | 0     |
| S15_extracted_36474       | 1027   | No | NA | 0    | 2  | Not-determined | Genome-fragment | NA    | 0     |
| S3_extracted_k141_49584   | 4881   | No | NA | 3    | 0  | Low-quality    | Genome-fragment | 5.48  | 0     |
| S11_vs_k141_15676  full   | 4882   | No | NA | 4    | 0  | Low-quality    | Genome-fragment | 12.42 | 0     |
| S15_extracted_37666       | 4882   | No | NA | 5    | 0  | Low-quality    | Genome-fragment | 3.25  | 0     |
| S15_extracted_37593       | 1315   | No | NA | 0    | 2  | Not-determined | Genome-fragment | NA    | 0     |
| S8_vs_k141_39082  full    | 4886   | No | NA | 0    | 2  | Low-quality    | Genome-fragment | 10.91 | 0     |
| S10_vs_8636  full         | 4887   | No | NA | 0    | 1  | Low-quality    | Genome-fragment | 4.09  | 0     |
| S15_extracted_37765       | 2019   | No | NA | 0    | 1  | Not-determined | Genome-fragment | NA    | 0     |
| S15_extracted_37884       | 1322   | No | NA | 0    | 1  | Not-determined | Genome-fragment | NA    | 0     |
| S8_vs_k141_202351  full   | 4887   | No | NA | 0    | 3  | Low-quality    | Genome-fragment | 5.02  | 0     |
| S15_extracted_37959       | 1245   | No | NA | 0    | 2  | Not-determined | Genome-fragment | NA    | 0     |
| S15_extracted_38023       | 3040   | No | NA | 0    | 2  | Not-determined | Genome-fragment |       |       |



|                           |       |     |    |    |    |                |                 |       |      |
|---------------------------|-------|-----|----|----|----|----------------|-----------------|-------|------|
| S3_vs_k141_2528  full     | 4900  | No  | NA | 1  | 0  | Low-quality    | Genome-fragment | 11.33 | 0    |
| S15_extracted_41830       | 2156  | No  | NA | 0  | 1  | Not-determined | Genome-fragment | NA    | 0    |
| S5_vs_k141_124784  full   | 4900  | No  | NA | 1  | 0  | Low-quality    | Genome-fragment | 3.72  | 0    |
| S9_vs_k141_3484  full     | 4901  | No  | NA | 0  | 1  | Low-quality    | Genome-fragment | 7.34  | 0    |
| S15_extracted_42168       | 1180  | No  | NA | 0  | 1  | Not-determined | Genome-fragment | NA    | 0    |
| S15_extracted_42193       | 1247  | No  | NA | 0  | 1  | Not-determined | Genome-fragment | NA    | 0    |
| S15_extracted_42323       | 7078  | No  | NA | 0  | 2  | Not-determined | Genome-fragment | NA    | 0    |
| S7_vs_104033  full        | 4901  | No  | NA | 5  | 0  | Low-quality    | Genome-fragment | 10.46 | 0    |
| S15_extracted_42401       | 2418  | No  | NA | 1  | 1  | Not-determined | Genome-fragment | NA    | 0    |
| S15_extracted_42659       | 4050  | No  | NA | 0  | 2  | Not-determined | Genome-fragment | NA    | 0    |
| S15_extracted_43075       | 4200  | No  | NA | 0  | 3  | Not-determined | Genome-fragment | NA    | 0    |
| S15_extracted_43212       | 5504  | No  | NA | 0  | 0  | Not-determined | Genome-fragment | NA    | 0    |
| S15_extracted_43372       | 1493  | No  | NA | 0  | 1  | Not-determined | Genome-fragment | NA    | 0    |
| S2_vs_k141_12861  full    | 4901  | No  | NA | 1  | 0  | Low-quality    | Genome-fragment | 8.4   | 0    |
| S15_extracted_43574       | 1325  | No  | NA | 0  | 2  | Not-determined | Genome-fragment | NA    | 0    |
| S15_extracted_43690       | 1379  | No  | NA | 0  | 4  | Not-determined | Genome-fragment | NA    | 0    |
| S15_extracted_43791       | 5531  | No  | NA | 0  | 3  | Not-determined | Genome-fragment | NA    | 0    |
| S15_extracted_43990       | 18327 | No  | NA | 0  | 12 | Not-determined | Genome-fragment | NA    | 0    |
| S15_extracted_44075       | 1189  | No  | NA | 0  | 1  | Not-determined | Genome-fragment | NA    | 0    |
| S15_extracted_44123       | 1162  | No  | NA | 0  | 2  | Not-determined | Genome-fragment | NA    | 0    |
| S15_extracted_44151       | 3862  | No  | NA | 0  | 3  | Not-determined | Genome-fragment | NA    | 0    |
| S9_extracted_k141_36059   | 4904  | No  | NA | 3  | 0  | Low-quality    | Genome-fragment | 13.23 | 0    |
| S15_extracted_44721       | 4384  | No  | NA | 0  | 2  | Not-determined | Genome-fragment | NA    | 0    |
| S5_vs_k141_76731  full    | 4905  | No  | NA | 6  | 1  | Low-quality    | Genome-fragment | 12.49 | 0    |
| S8_vs_k141_37694  full    | 4905  | No  | NA | 0  | 2  | Low-quality    | Genome-fragment | 3.65  | 0    |
| S15_extracted_44485       | 1489  | No  | NA | 0  | 0  | Not-determined | Genome-fragment | NA    | 0    |
| S15_extracted_44800       | 1244  | No  | NA | 0  | 1  | Not-determined | Genome-fragment | NA    | 0    |
| S3_extracted_k141_38391   | 4906  | No  | NA | 3  | 0  | Low-quality    | Genome-fragment | 8.12  | 0    |
| S15_extracted_45152       | 1110  | No  | NA | 1  | 1  | Not-determined | Genome-fragment | NA    | 0    |
| S15_extracted_45174       | 1142  | No  | NA | 0  | 0  | Not-determined | Genome-fragment | NA    | 0    |
| S16_vs_34616  full        | 4908  | No  | NA | 3  | 0  | Low-quality    | Genome-fragment | 13.58 | 0    |
| S17_extracted_k141_172874 | 4909  | No  | NA | 3  | 1  | Low-quality    | Genome-fragment | 0.82  | 0    |
| S15_extracted_45443       | 1027  | No  | NA | 0  | 1  | Not-determined | Genome-fragment | NA    | 0    |
| S15_extracted_45497       | 1063  | No  | NA | 0  | 1  | Not-determined | Genome-fragment | NA    | 0    |
| S15_extracted_45615       | 1276  | No  | NA | 0  | 0  | Not-determined | Genome-fragment | NA    | 0    |
| S15_extracted_45691       | 1112  | No  | NA | 0  | 0  | Not-determined | Genome-fragment | NA    | 0    |
| S15_extracted_45780       | 1229  | No  | NA | 0  | 0  | Not-determined | Genome-fragment | NA    | 0    |
| S15_extracted_45879       | 9588  | No  | NA | 0  | 1  | Not-determined | Genome-fragment | NA    | 0    |
| S15_extracted_45918       | 1087  | No  | NA | 1  | 1  | Not-determined | Genome-fragment | NA    | 0    |
| S1_vs_k141_91914  full    | 4909  | No  | NA | 3  | 0  | Low-quality    | Genome-fragment | 13.25 | 0    |
| S15_extracted_45957       | 2158  | No  | NA | 0  | 1  | Not-determined | Genome-fragment | NA    | 0    |
| S15_extracted_46090       | 2916  | No  | NA | 1  | 1  | Not-determined | Genome-fragment | NA    | 0    |
| S15_extracted_46182       | 4551  | No  | NA | 0  | 3  | Not-determined | Genome-fragment | NA    | 0    |
| S7_vs_102327  full        | 4909  | No  | NA | 1  | 0  | Low-quality    | Genome-fragment | 12.56 | 0    |
| S16_vs_10318  full        | 4909  | No  | NA | 0  | 0  | Low-quality    | Genome-fragment | 7.74  | 0    |
| S15_extracted_46566       | 1145  | No  | NA | 0  | 1  | Not-determined | Genome-fragment | NA    | 0    |
| S15_extracted_46717       | 1050  | No  | NA | 0  | 0  | Not-determined | Genome-fragment | NA    | 0    |
| S11_extracted_k141_69162  | 4910  | No  | NA | 4  | 0  | Low-quality    | Genome-fragment | 8.59  | 0    |
| S15_extracted_47255       | 1400  | No  | NA | 0  | 0  | Not-determined | Genome-fragment | NA    | 0    |
| S15_extracted_47313       | 1151  | No  | NA | 0  | 0  | Not-determined | Genome-fragment | NA    | 0    |
| S5_vs_k141_44072  full    | 4910  | No  | NA | 1  | 0  | Low-quality    | Genome-fragment | 12.29 | 0    |
| S15_extracted_47421       | 2213  | No  | NA | 4  | 1  | Not-determined | Genome-fragment | NA    | 0    |
| S15_extracted_47940       | 3520  | No  | NA | 0  | 2  | Not-determined | Genome-fragment | NA    | 0    |
| S15_extracted_47960       | 1209  | No  | NA | 0  | 1  | Not-determined | Genome-fragment | NA    | 0    |
| S15_extracted_47963       | 1279  | No  | NA | 0  | 1  | Not-determined | Genome-fragment | NA    | 0    |
| S15_extracted_48368       | 1688  | No  | NA | 0  | 1  | Not-determined | Genome-fragment | NA    | 0    |
| S7_vs_100242  full        | 4910  | No  | NA | 1  | 0  | Low-quality    | Genome-fragment | 12.03 | 0    |
| S15_extracted_48544       | 1252  | No  | NA | 0  | 0  | Not-determined | Genome-fragment | NA    | 0    |
| S15_extracted_48585       | 1109  | No  | NA | 0  | 0  | Not-determined | Genome-fragment | NA    | 0    |
| S15_extracted_48586       | 1792  | No  | NA | 0  | 1  | Not-determined | Genome-fragment | NA    | 0    |
| S11_vs_k141_102250  full  | 4911  | No  | NA | 1  | 0  | Low-quality    | Genome-fragment | 12.87 | 0    |
| S15_extracted_49180       | 4359  | No  | NA | 1  | 1  | Not-determined | Genome-fragment | NA    | 0    |
| S15_extracted_49210       | 1077  | No  | NA | 0  | 0  | Not-determined | Genome-fragment | NA    | 0    |
| S15_extracted_49267       | 1034  | No  | NA | 0  | 1  | Not-determined | Genome-fragment | NA    | 0    |
| S15_extracted_49507       | 1133  | No  | NA | 0  | 1  | Not-determined | Genome-fragment | NA    | 0    |
| S15_extracted_49639       | 4694  | No  | NA | 0  | 2  | Not-determined | Genome-fragment | NA    | 0    |
| S15_extracted_49812       | 9340  | No  | NA | 0  | 7  | Not-determined | Genome-fragment | NA    | 0    |
| S15_extracted_50315       | 1008  | No  | NA | 0  | 1  | Not-determined | Genome-fragment | NA    | 0    |
| S15_extracted_50357       | 1320  | No  | NA | 0  | 0  | Not-determined | Genome-fragment | NA    | 0    |
| S15_extracted_50471       | 1157  | No  | NA | 0  | 1  | Not-determined | Genome-fragment | NA    | 0    |
| S16_vs_77252  full        | 4911  | No  | NA | 0  | 3  | Low-quality    | Genome-fragment | 2.48  | 0    |
| S17_extracted_k141_99553  | 4912  | No  | NA | 0  | 0  | Low-quality    | Genome-fragment | 8.13  | 0    |
| S15_extracted_51163       | 1034  | No  | NA | 0  | 0  | Not-determined | Genome-fragment | NA    | 0    |
| S14_extracted_k141_33714  | 4912  | No  | NA | 2  | 0  | Low-quality    | Genome-fragment | 3.68  | 0    |
| S12_vs_k141_22241  full   | 4912  | No  | NA | 3  | 1  | Low-quality    | Genome-fragment | 2.13  | 0    |
| S15_extracted_51766       | 1241  | No  | NA | 0  | 1  | Not-determined | Genome-fragment | NA    | 0    |
| S15_extracted_51879       | 1759  | No  | NA | 0  | 0  | Not-determined | Genome-fragment | NA    | 0    |
| S15_extracted_51920       | 2345  | No  | NA | 0  | 2  | Not-determined | Genome-fragment | NA    | 0    |
| S15_extracted_51935       | 1011  | No  | NA | 1  | 1  | Not-determined | Genome-fragment | NA    | 0    |
| S11_extracted_k141_46510  | 4913  | No  | NA | 1  | 0  | Low-quality    | Genome-fragment | 8.17  | 0    |
| S15_extracted_52118       | 3360  | No  | NA | 0  | 2  | Not-determined | Genome-fragment | NA    | 0    |
| S11_extracted_k141_29177  | 4913  | No  | NA | 0  | 0  | Low-quality    | Genome-fragment | 2.92  | 0    |
| S15_extracted_52231       | 1247  | No  | NA | 0  | 2  | Not-determined | Genome-fragment | NA    | 0    |
| S15_extracted_52240       | 3200  | No  | NA | 0  | 0  | Not-determined | Genome-fragment | NA    | 0    |
| S5_vs_k141_109835  full   | 4918  | No  | NA | 0  | 0  | Low-quality    | Genome-fragment | 13.37 | 0    |
| S15_extracted_52369       | 1131  | No  | NA | 0  | 0  | Not-determined | Genome-fragment | NA    | 0    |
| S15_extracted_52525       | 1042  | No  | NA | 0  | 0  | Not-determined | Genome-fragment | NA    | 0    |
| S15_extracted_52779       | 1339  | No  | NA | 0  | 1  | Not-determined | Genome-fragment | NA    | 0    |
| S11_vs_k141_8388  full    | 4921  | No  | NA | 0  | 0  | Low-quality    | Genome-fragment | 11.62 | 0    |
| S15_extracted_53233       | 6881  | No  | NA | 0  | 0  | Not-determined | Genome-fragment | NA    | 0    |
| S15_extracted_53578       | 3306  | No  | NA | 0  | 1  | Not-determined | Genome-fragment | NA    | 5.83 |
| S1_extracted_k141_90663   | 4921  | No  | NA | 0  | 0  | Low-quality    | Genome-fragment | 16.24 | 0    |
| S4_extracted_2435         | 4921  | No  | NA | 12 | 0  | Low-quality    | Genome-fragment | NA    | 0    |
| S15_extracted_54164       | 4201  | No  | NA | 0  | 0  | Not-determined | Genome-fragment | NA    | 0    |
| S15_extracted_54579       | 1249  | No  | NA | 1  | 1  | Not-determined | Genome-fragment | NA    | 0    |
| S15_extracted_54590       | 1074  | No  | NA | 0  | 0  | Not-determined | Genome-fragment | NA    | 0    |
| S15_extracted_54733       | 1172  | No  | NA | 0  | 1  | Not-determined | Genome-fragment | NA    | 0    |
| S3_extracted_k141_109177  | 4922  | No  | NA | 1  | 0  | Low-quality    | Genome-fragment | 2.77  | 0    |
| S15_vs_6747  full         | 4922  | No  | NA | 1  | 1  | Low-quality    | Genome-fragment | 2.71  | 0    |
| S15_extracted_55041       | 1178  | No  | NA | 0  | 0  | Not-determined | Genome-fragment | NA    | 0    |
| S8_extracted_k141_42647   | 4922  | No  | NA | 4  | 0  | Low-quality    | Genome-fragment | 15.76 | 0    |
| S15_extracted_55287       | 4487  | No  | NA | 1  | 1  | Not-determined | Genome-fragment | NA    | 0    |
| S15_extracted_55400       | 1182  | No  | NA | 0  | 0  | Not-determined | Genome-fragment | NA    | 0    |
| S15_extracted_55639       | 13570 | No  | NA | 6  | 1  | High-quality   | High-quality    | 98.5  | 0    |
| S15_extracted_55741       | 1243  | No  | NA | 1  | 1  | Not-determined | Genome-fragment | NA    | 0    |
| S15_extracted_55747       | 3396  | No  | NA | 0  | 2  | Not-determined | Genome-fragment | NA    | 0    |
| S17_extracted_k141_171223 | 4924  | No  | NA | 5  | 0  | Low-quality    | Genome-fragment | 16.23 | 0    |
| S15_extracted_56048       | 1054  | No  | NA | 0  | 1  | Not-determined | Genome-fragment | NA    | 0    |
| S15_extracted_56104       | 2150  | No  | NA | 0  | 0  | Not-determined | Genome-fragment | NA    | 0    |
| S3_extracted_k141_126627  | 4926  | No  | NA | 2  | 0  | Low-quality    | Genome-fragment | 9.62  | 0    |
| S5_vs_k141_71294  full    | 4928  | No  | NA | 0  | 2  | Low-quality    | Genome-fragment | 2.65  | 0    |
| S12_vs_k141_105781  full  | 4928  | No  | NA | 0  | 0  | Low-quality    | Genome-fragment | 2.01  | 0    |
| S15_extracted_56246       | 1055  | No  | NA | 0  | 2  | Not-determined | Genome-fragment | NA    | 0    |
| S15_extracted_56285       | 2584  | No  | NA | 0  | 0  | Not-determined | Genome-fragment | NA    | 0    |
| S16_vs_135877  full       | 4929  | No  | NA | 3  | 0  | Low-quality    | Genome-fragment | 4.42  | 0    |
| S15_extracted_56503       | 1177  | No  | NA | 0  | 0  | Not-determined | Genome-fragment | NA    | 0    |
| S15_extracted_56602       | 4425  | No  | NA | 0  | 2  | Not-determined | Genome-fragment | NA    | 0    |
| S15_extracted_56685       | 1007  | No  | NA | 1  | 1  | Not-determined | Genome-fragment | NA    | 0    |
| S9_vs_k141_15536  full    | 4930  | No  | NA | 0  | 0  | Low-quality    | Genome-fragment | 10.88 | 0    |
| S15_extracted_56983       | 1881  | No  | NA | 0  | 1  | Not-determined | Genome-fragment | NA    | 0    |
| S15_extracted_57097       | 1899  | No  | NA | 0  | 1  | Not-determined | Genome-fragment | NA    | 0    |
| S15_extracted_57135       | 2168  | No  | NA | 1  | 1  | Not-determined | Genome-fragment | NA    | 0    |
| S11_vs_k141_64430  full   | 4930  | Yes | NA | 1  | 1  | Low-quality    | Genome-fragment | 1.36  | 15.4 |
| S3_extracted_k141_110422  | 1070  | No  | NA | 0  | 1  | Not-determined | Genome-fragment | NA    | 0    |
| S15_extracted_57401       | 4930  | No  | NA | 0  | 0  | Low-quality    | Genome-fragment | 11.42 | 0    |
| S15_extracted_57401       | 1116  | No  | NA | 0  | 0  | Not-determined | Genome-fragment | NA    | 0    |
| S15_extracted_57660       | 1591  | No  | NA | 0  | 2  | Not-determined | Genome-fragment | NA    | 0    |
| S15_extracted_57911       | 1039  | No  | NA | 1  | 1  | Not-determined | Genome-fragment | NA    | 0    |
| S3_vs_k141_33333  full    | 4930  | No  | NA | 2  | 0  | Low-quality    | Genome-fragment | 2.97  | 0    |
| S15_extracted_58117       | 5963  | No  | NA | 0  | 3  | Not-determined | Genome-fragment | NA    | 0    |
| S5_vs_k141_47602  full    | 4933  | No  | NA | 0  | 3  | Low-quality    | Genome-fragment | 9.99  | 0    |
| S10_vs_6393  full         | 4934  | No  | NA | 0  | 0  | Low-quality    | Genome-fragment | 10.86 | 0    |
| S15_extracted_58201       | 3173  | No  | NA | 0  | 1  | Not-determined | Genome-fragment | NA    | 0    |
| S14_extracted_k141_38132  | 4935  | No  | NA | 4  | 0  | Low-quality    | Genome-fragment | 2.85  | 0    |
| S15_extracted_58159       | 1943  | No  | NA | 0  | 2  | Not-determined | Genome-fragment | NA    | 0    |
| S15_extracted_58329       | 1045  | No  | NA | 0  | 0  | Not-determined | Genome-fragment | NA    | 0    |
| S15_extracted_58467       | 91453 | No  | NA | 24 | 0  | High-quality   | High-quality    | 99.98 | 0    |
| S15_extracted_58948       | 1244  | No  | NA | 0  | 1  | Not-determined | Genome-fragment | NA    | 0    |
| S15_extracted_59049       | 27951 | No  | NA | 0  | 8  | Not-determined | Genome-fragment | NA    | 0    |
| S15_extracted_59106       | 4461  | No  | NA | 0  | 1  | Not-determined | Genome-fragment | NA    | 0    |
| S12_extracted_k141_1631   | 4937  | No  | NA | 3  | 0  | Low-quality    | Genome-fragment | 13.54 | 0    |
| S11_vs_k141_93274  full   | 4942  | No  | NA | 1  | 0  | Low-quality    | Genome-fragment | 2.98  | 0    |
| S15_extracted_59334       | 1086  | No  | NA | 0  | 1  | Not-determined | Genome-fragment | NA    | 0    |
| S15_extracted_59350       | 12904 | No  | NA | 0  | 3  | Not-determined | Genome-fragment | NA    | 0    |
| S16_vs_16152  full        | 4942  | No  | NA | 0  | 0  | Low-quality    | Genome-fragment | 14.14 | 0    |
| S15_extracted_59427       | 1513  | No  | NA | 0  | 2  | Not-determined | Genome-fragment | NA    | 0    |
| S15_extracted_59593       | 1142  | No  | NA | 0  | 0  | Not-determined | Genome-fragment | NA    | 0    |
| S15_extracted_59653       | 1078  | No  | NA | 1  | 1  | Not-determined | Genome-fragment | NA    | 0    |
| S15_extracted_59801       | 1014  | No  | NA | 0  | 2  | Not-determined | Genome-fragment | NA    | 0    |
| S15_extracted_59          |       |     |    |    |    |                |                 |       |      |



|                             |        |     |    |       |    |                |                 |       |       |
|-----------------------------|--------|-----|----|-------|----|----------------|-----------------|-------|-------|
| S15_extracted_63774         | 1158   | No  | NA | 0     | 0  | Not-determined | Genome-fragment | NA    | 0     |
| S11_vs_k141_402011[full]    | 4950   | No  | NA | 0     | 0  | Low-quality    | Genome-fragment | 13.46 | 0     |
| S8_extracted_k141_182096    | 4950   | No  | NA | 0     | 1  | Not-determined | Genome-fragment | 4.82  | 0     |
| S15_extracted_63976         | 1275   | No  | NA | 0     | 1  | Not-determined | Genome-fragment | NA    | 0     |
| S15_extracted_64018         | 1912   | No  | NA | 0     | 1  | Not-determined | Genome-fragment | NA    | 0     |
| S8_extracted_k141_78432     | 4951   | No  | NA | 3     | 0  | Low-quality    | Genome-fragment | 22.59 | 0     |
| S15_extracted_64054         | 1477   | No  | NA | 0     | 1  | Not-determined | Genome-fragment | NA    | 0     |
| S15_extracted_64190         | 1052   | No  | NA | 0     | 0  | Not-determined | Genome-fragment | NA    | 0     |
| S15_extracted_64224         | 5458   | No  | NA | 0     | 2  | Not-determined | Genome-fragment | NA    | 0     |
| S15_extracted_64267         | 2413   | No  | NA | 0     | 2  | Not-determined | Genome-fragment | NA    | 0     |
| S15_extracted_64340         | 1069   | No  | NA | 0     | 1  | Not-determined | Genome-fragment | NA    | 0     |
| S15_extracted_64613         | 1298   | No  | NA | 0     | 0  | Not-determined | Genome-fragment | NA    | 0     |
| S15_extracted_64686         | 1104   | No  | NA | 0     | 2  | Not-determined | Genome-fragment | NA    | 0     |
| S14_extracted_k141_89714    | 4952   | No  | NA | 11    | 0  | Low-quality    | Genome-fragment | 16.34 | 0     |
| S14_extracted_k141_82021    | 4955   | No  | NA | 2     | 0  | Low-quality    | Genome-fragment | 12.93 | 0     |
| S15_extracted_65421         | 1577   | No  | NA | 0     | 0  | Not-determined | Genome-fragment | NA    | 0     |
| S15_extracted_65481         | 1579   | No  | NA | 0     | 2  | Not-determined | Genome-fragment | NA    | 0     |
| S15_extracted_65538         | 1465   | No  | NA | 0     | 1  | Not-determined | Genome-fragment | NA    | 0     |
| S15_extracted_65710         | 1157   | No  | NA | 0     | 0  | Not-determined | Genome-fragment | NA    | 0     |
| S17_extracted_k141_2819     | 4959   | No  | NA | 4     | 0  | Low-quality    | Genome-fragment | 7.43  | 0     |
| S15_extracted_65910         | 1200   | No  | NA | 0     | 0  | Not-determined | Genome-fragment | NA    | 0     |
| S15_extracted_65925         | 1048   | No  | NA | 0     | 1  | Not-determined | Genome-fragment | NA    | 0     |
| S15_extracted_65970         | 4284   | No  | NA | 0     | 0  | Not-determined | Genome-fragment | NA    | 0     |
| S15_vs_21557[full]          | 4959   | No  | NA | 5     | 0  | Low-quality    | Genome-fragment | 2.63  | 0     |
| S7_vs_112026[full]          | 4960   | No  | NA | 0     | 1  | Low-quality    | Genome-fragment | 14.04 | 0     |
| S15_extracted_66331         | 1157   | No  | NA | 0     | 1  | Not-determined | Genome-fragment | NA    | 0     |
| S15_extracted_66620         | 1494   | No  | NA | 0     | 1  | Not-determined | Genome-fragment | NA    | 0     |
| S3_vs_k141_114816[full]     | 4963   | No  | NA | 0     | 0  | Low-quality    | Genome-fragment | 10.02 | 0     |
| S15_extracted_66818         | 1230   | No  | NA | 0     | 2  | Not-determined | Genome-fragment | NA    | 0     |
| S14_vs_k141_27056[full]     | 4964   | No  | NA | 1     | 0  | Low-quality    | Genome-fragment | 10.55 | 0     |
| S15_extracted_66970         | 1127   | No  | NA | 0     | 1  | Not-determined | Genome-fragment | NA    | 0     |
| S15_extracted_67293         | 3158   | No  | NA | 0     | 2  | Not-determined | Genome-fragment | NA    | 0     |
| S15_extracted_67297         | 1163   | No  | NA | 0     | 2  | Not-determined | Genome-fragment | NA    | 0     |
| S15_extracted_67427         | 4276   | No  | NA | 0     | 3  | Not-determined | Genome-fragment | NA    | 0     |
| S2_extracted_k141_6427      | 4964   | No  | NA | 7     | 0  | Low-quality    | Genome-fragment | 15.17 | 0     |
| S15_extracted_67626         | 1201   | No  | NA | 0     | 2  | Not-determined | Genome-fragment | NA    | 0     |
| S15_extracted_67942         | 1928   | No  | NA | 0     | 1  | Not-determined | Genome-fragment | NA    | 0     |
| S15_extracted_68042         | 1151   | No  | NA | 0     | 2  | Not-determined | Genome-fragment | NA    | 0     |
| S15_extracted_68280         | 1231   | No  | NA | 1     | 1  | Not-determined | Genome-fragment | NA    | 0     |
| S8_extracted_k141_55621     | 4964   | No  | NA | 1     | 0  | Low-quality    | Genome-fragment | 9.03  | 0     |
| S15_extracted_68507         | 1254   | No  | NA | 0     | 0  | Not-determined | Genome-fragment | NA    | 0     |
| S5_extracted_k141_100075    | 4967   | No  | NA | 0     | 0  | Low-quality    | Genome-fragment | 6.03  | 0     |
| S15_extracted_68961         | 1094   | No  | NA | 0     | 2  | Not-determined | Genome-fragment | NA    | 0     |
| S15_extracted_69205         | 1445   | No  | NA | 0     | 0  | Not-determined | Genome-fragment | NA    | 0     |
| S3_extracted_k141_126958    | 4968   | No  | NA | 0     | 0  | Low-quality    | Genome-fragment | 2.58  | 0     |
| S15_extracted_69644         | 1954   | No  | NA | 0     | 2  | Not-determined | Genome-fragment | NA    | 0     |
| S15_extracted_69747         | 2009   | No  | NA | 0     | 1  | Not-determined | Genome-fragment | NA    | 0     |
| S15_extracted_69786         | 1008   | No  | NA | 0     | 0  | Not-determined | Genome-fragment | NA    | 0     |
| S14_extracted_k141_60395    | 4969   | No  | NA | 0     | 0  | Low-quality    | Genome-fragment | 33.45 | 0     |
| S15_extracted_70068         | 1794   | No  | NA | 0     | 2  | Not-determined | Genome-fragment | NA    | 0     |
| S5_vs_k141_62346[full]      | 4972   | No  | NA | 1     | 0  | Low-quality    | Genome-fragment | 12.03 | 0     |
| S8_extracted_k141_128212    | 4972   | No  | NA | 0     | 0  | Low-quality    | Genome-fragment | 8.43  | 0     |
| S14_vs_k141_402111[102gene] | 4973   | No  | NA | 2     | 0  | Low-quality    | Genome-fragment | 8.19  | 0     |
| S7_extracted_65867          | 4973   | No  | NA | 0     | 0  | Low-quality    | Genome-fragment | 7.04  | 0     |
| S15_extracted_70773         | 1179   | No  | NA | 0     | 0  | Not-determined | Genome-fragment | NA    | 0     |
| S15_extracted_71204         | 1246   | No  | NA | 0     | 1  | Not-determined | Genome-fragment | NA    | 0     |
| S15_extracted_71296         | 1378   | No  | NA | 0     | 1  | Not-determined | Genome-fragment | NA    | 0     |
| S15_extracted_71530         | 1042   | No  | NA | 0     | 1  | Not-determined | Genome-fragment | NA    | 0     |
| S15_extracted_71583         | 1098   | No  | NA | 0     | 1  | Not-determined | Genome-fragment | NA    | 0     |
| S12_extracted_k141_117018   | 4976   | No  | NA | 5     | 0  | Low-quality    | Genome-fragment | 14.52 | 0     |
| S15_extracted_71616         | 18326  | No  | NA | 7     | 0  | Medium-quality | Genome-fragment | 62.04 | 0     |
| S15_extracted_71676         | 1734   | No  | NA | 0     | 0  | Not-determined | Genome-fragment | NA    | 0     |
| S14_extracted_k141_46499    | 4978   | No  | NA | 0     | 0  | Low-quality    | Genome-fragment | 17.21 | 0     |
| S12_vs_k141_185376[full]    | 4979   | No  | NA | 0     | 1  | Low-quality    | Genome-fragment | 9.03  | 0     |
| S15_extracted_72459         | 1091   | No  | NA | 0     | 1  | Not-determined | Genome-fragment | NA    | 0     |
| S15_extracted_72533         | 1137   | No  | NA | 0     | 1  | Not-determined | Genome-fragment | NA    | 0     |
| S15_extracted_72737         | 1564   | No  | NA | 0     | 1  | Not-determined | Genome-fragment | NA    | 0     |
| S5_vs_k141_79191[full]      | 4980   | No  | NA | 1     | 1  | Low-quality    | Genome-fragment | 11.33 | 0     |
| S15_vs_51001[full]          | 4981   | No  | NA | 6     | 0  | Low-quality    | Genome-fragment | 3.71  | 0     |
| S3_vs_k141_92235[full]      | 4982   | No  | NA | 6     | 0  | Low-quality    | Genome-fragment | 13.9  | 0     |
| S12_extracted_k141_153847   | 4982   | No  | NA | 0     | 2  | Low-quality    | Genome-fragment | 2.95  | 0     |
| S3_vs_k141_57051[full]      | 4983   | No  | NA | 4     | 0  | Low-quality    | Genome-fragment | 9.97  | 0     |
| S16_vs_131665[full]         | 4984   | No  | NA | 0     | 1  | Low-quality    | Genome-fragment | 4.4   | 0     |
| S12_extracted_k141_14525    | 4984   | No  | NA | 1     | 0  | Low-quality    | Genome-fragment | 12.4  | 0     |
| S15_extracted_73424         | 3511   | No  | NA | 0     | 0  | Not-determined | Genome-fragment | NA    | 0     |
| S15_extracted_73449         | 3224   | No  | NA | 0     | 0  | Not-determined | Genome-fragment | NA    | 0     |
| S11_vs_k141_35162[full]     | 4985   | No  | NA | 2     | 0  | Low-quality    | Genome-fragment | 3.09  | 0     |
| S15_extracted_74024         | 1626   | No  | NA | 0     | 0  | Not-determined | Genome-fragment | NA    | 0     |
| S15_extracted_74148         | 1452   | No  | NA | 0     | 0  | Not-determined | Genome-fragment | NA    | 0     |
| S15_extracted_74228         | 1039   | No  | NA | 0     | 1  | Not-determined | Genome-fragment | NA    | 0     |
| S15_extracted_74351         | 1321   | No  | NA | 0     | 0  | Not-determined | Genome-fragment | NA    | 0     |
| S15_extracted_74400         | 1155   | No  | NA | 0     | 1  | Not-determined | Genome-fragment | NA    | 0     |
| S15_extracted_74449         | 1050   | No  | NA | 0     | 0  | Not-determined | Genome-fragment | NA    | 0     |
| S5_extracted_k141_129451    | 4985   | No  | NA | 0     | 0  | Low-quality    | Genome-fragment | 7.84  | 0     |
| S15_extracted_74586         | 84900  | No  | NA | 12    | 4  | Complete       | High-quality    | 100   | 0     |
| S5_extracted_k141_99061     | 4985   | No  | NA | 0     | 4  | Low-quality    | Genome-fragment | 0.73  | 0     |
| S15_extracted_74719         | 1433   | No  | NA | 0     | 2  | Not-determined | Genome-fragment | NA    | 0     |
| S15_extracted_74903         | 1114   | No  | NA | 0     | 0  | Not-determined | Genome-fragment | NA    | 0     |
| S15_extracted_75077         | 1151   | No  | NA | 0     | 1  | Not-determined | Genome-fragment | NA    | 0     |
| S15_extracted_75386         | 1356   | No  | NA | 0     | 2  | Not-determined | Genome-fragment | NA    | 0     |
| S15_extracted_75433         | 1048   | No  | NA | 0     | 0  | Not-determined | Genome-fragment | NA    | 0     |
| S15_extracted_75739         | 1108   | No  | NA | 0     | 1  | Not-determined | Genome-fragment | NA    | 0     |
| S15_extracted_75914         | 1071   | No  | NA | 0     | 0  | Not-determined | Genome-fragment | NA    | 0     |
| S15_extracted_75917         | 5130   | No  | NA | 0     | 0  | Not-determined | Genome-fragment | NA    | 0     |
| S15_extracted_75924         | 185145 | No  | NA | 26    | 3  | Complete       | High-quality    | 100   | 0     |
| S15_extracted_76063         | 1088   | No  | NA | 0     | 1  | Not-determined | Genome-fragment | NA    | 0     |
| S3_vs_k141_96852[full]      | 4986   | No  | NA | 0     | 0  | Low-quality    | Genome-fragment | 11.59 | 0     |
| S8_vs_k141_59471[full]      | 4987   | No  | NA | 0     | 3  | Low-quality    | Genome-fragment | 8.81  | 0     |
| S15_extracted_76787         | 1346   | No  | NA | 0     | 0  | Not-determined | Genome-fragment | NA    | 0     |
| S15_extracted_76884         | 7142   | No  | NA | 0     | 7  | Not-determined | Genome-fragment | NA    | 0     |
| S15_extracted_76997         | 1208   | No  | NA | 0     | 1  | Not-determined | Genome-fragment | NA    | 0     |
| S10_extracted_95374         | 4988   | No  | NA | 0     | 1  | Low-quality    | Genome-fragment | 10.73 | 0     |
| S15_extracted_77240         | 1860   | No  | NA | 0     | 2  | Not-determined | Genome-fragment | NA    | 0     |
| S14_vs_k141_54262[full]     | 4990   | No  | NA | 1     | 0  | Low-quality    | Genome-fragment | 11.83 | 0     |
| S5_extracted_k141_109991    | 4990   | No  | NA | 0     | 0  | Low-quality    | Genome-fragment | 12.05 | 0     |
| S15_extracted_77515         | 1040   | No  | NA | 0     | 1  | Not-determined | Genome-fragment | NA    | 0     |
| S15_vs_14071[full]          | 13007  | No  | NA | 7     | 0  | High-quality   | High-quality    | 98.04 | 0     |
| S15_vs_17031[full]          | 40282  | No  | NA | 17    | 2  | High-quality   | High-quality    | 93.75 | 0     |
| S15_vs_182741[full]         | 5785   | No  | NA | 9     | 0  | High-quality   | High-quality    | 98.64 | 0     |
| S15_vs_76390[full]          | 22356  | No  | NA | 4     | 0  | High-quality   | High-quality    | 97.63 | 0     |
| S8_extracted_k141_195322    | 4990   | No  | NA | 0     | 1  | Low-quality    | Genome-fragment | 7.02  | 0     |
| S15_vs_76453[full]          | 4149   | No  | NA | 0     | 2  | Not-determined | Genome-fragment | NA    | 0     |
| S15_vs_76554[full]          | 6740   | No  | NA | 0     | 1  | Not-determined | Genome-fragment | NA    | 0     |
| S15_vs_1511[full]           | 2271   | No  | NA | 0     | 1  | Not-determined | Genome-fragment | NA    | 0     |
| S14_extracted_k141_50245    | 4991   | No  | NA | 0     | 0  | Low-quality    | Genome-fragment | NA    | 14    |
| S15_vs_3601[full]           | 2963   | No  | NA | 0     | 3  | Not-determined | Genome-fragment | NA    | 0     |
| S5_vs_k141_1411561[full]    | 4991   | Yes | NA | 4266  | 1  | Low-quality    | Genome-fragment | 2.68  | 14.53 |
| S12_vs_k141_179354[full]    | 4991   | No  | NA | 0     | 0  | Low-quality    | Genome-fragment | 4.76  | 0     |
| S15_vs_15901[full]          | 1454   | No  | NA | 0     | 2  | Not-determined | Genome-fragment | NA    | 0     |
| S8_extracted_k141_68847     | 4991   | Yes | NA | 3665  | 3  | Low-quality    | Genome-fragment | 4.34  | 26.57 |
| S15_vs_17341[full]          | 3041   | No  | NA | 0     | 1  | Not-determined | Genome-fragment | NA    | 0     |
| S15_vs_13781[full]          | 3174   | No  | NA | 0     | 1  | Not-determined | Genome-fragment | NA    | 0     |
| S15_vs_20671[full]          | 1811   | No  | NA | 0     | 1  | Not-determined | Genome-fragment | NA    | 0     |
| S14_extracted_k141_4629     | 4994   | No  | NA | 3     | 0  | Low-quality    | Genome-fragment | 13.38 | 0     |
| S7_extracted_2050           | 4994   | No  | NA | 2     | 0  | Low-quality    | Genome-fragment | 8.17  | 0     |
| S7_vs_121375[full]          | 4994   | No  | NA | 0     | 1  | Low-quality    | Genome-fragment | 16.93 | 0     |
| S7_vs_129275[full]          | 4994   | No  | NA | 0     | 3  | Low-quality    | Genome-fragment | 7.51  | 0     |
| S15_vs_36081[full]          | 57618  | Yes | NA | 53922 | 13 | High-quality   | High-quality    | 95.21 | 6.41  |
| S15_vs_39971[full]          | 3077   | No  | NA | 0     | 2  | Not-determined | Genome-fragment | NA    | 0     |
| S10_extracted_23837         | 4996   | No  | NA | 2     | 1  | Low-quality    | Genome-fragment | 7.24  | 0     |
| S15_vs_41991[full]          | 4040   | No  | NA | 0     | 1  | Not-determined | Genome-fragment | NA    | 0     |
| S15_vs_46061[full]          | 9736   | No  | NA | 0     | 2  | Not-determined | Genome-fragment | NA    | 0     |
| S8_extracted_k141_183152    | 4996   | No  | NA | 0     | 0  | Low-quality    | Genome-fragment | 5.04  | 0     |
| S5_vs_k141_55427[full]      | 4998   | Yes | NA | 777   | 1  | Low-quality    | Genome-fragment | 0.73  | 84.45 |
| S16_extracted_116746        | 4998   | Yes | NA | 1940  | 2  | Low-quality    | Genome-fragment | 5.34  | 61.18 |
| S12_vs_k141_1695491[full]   | 4998   | No  | NA | 1     | 0  | Low-quality    | Genome-fragment | 8.39  | 0     |
| S6_vs_k141_130461[full]     | 4998   | No  | NA | 4     | 0  | Low-quality    | Genome-fragment | 12.39 | 0     |
| S15_vs_53691[full]          | 1265   | No  | NA | 0     | 1  | Not-determined | Genome-fragment | NA    | 0     |
| S7_vs_184171[full]          | 4999   | No  | NA | 3     | 0  | Low-quality    | Genome-fragment | 11.64 | 0     |
| S15_vs_55101[full]          | 1995   | No  | NA | 0     | 2  | Not-determined | Genome-fragment | NA    | 0     |
| S8_vs_k141_44831[full]      | 5001   | No  | NA | 0     | 4  | Low-quality    | Genome-fragment | 7.3   | 0     |
| S15_vs_56341[full]          | 1221   | No  | NA | 0     | 0  | Not-determined | Genome-fragment | NA    | 0     |
| S15_vs_56361[full]          | 5256   | No  | NA | 0     | 1  | Not-determined | Genome-fragment | NA    | 0     |
| S11_vs_k141_487831[full]    | 5002   | Yes | NA | 1280  | 1  | Low-quality    | Genome-fragment | 2.39  | 74.41 |
| S8_extracted_k141_135163    | 5003   | No  | NA | 0     | 6  | Low-quality    | Genome-fragment | 5.61  | 0     |
| S15_vs_60791[full]          | 1867   | No  | NA | 0     | 3  | Not-determined | Genome-fragment | NA    | 0     |
| S15_vs_61321[full]          | 5258   | No  | NA | 0     | 5  | Not-determined | Genome-fragment | NA    | 0     |
| S17_extracted_k141_65943    | 5004   | No  |    |       |    |                |                 |       |       |



|                           |       |     |      |    |                |                 |                 |       |       |
|---------------------------|-------|-----|------|----|----------------|-----------------|-----------------|-------|-------|
| S15_v3_11207[full]        | 1741  | No  | NA   | 0  | 1              | Not-determined  | Genome-fragment | NA    | 0     |
| S3_v3_k141_4331[full]     | 5020  | No  | NA   | 0  | 0              | Low-quality     | Genome-fragment | 9.19  | 0     |
| S3_v3_k141_100691[full]   | 5022  | No  | NA   | 0  | 0              | Low-quality     | Genome-fragment | 5.88  | 0     |
| S15_v3_11435[full]        | 1218  | No  | NA   | 0  | 0              | Not-determined  | Genome-fragment | NA    | 0     |
| S15_v3_11544[full]        | 4776  | No  | NA   | 0  | 0              | Not-determined  | Genome-fragment | NA    | 0     |
| S7_extracted_18028        | 5023  | No  | NA   | 0  | 4              | Low-quality     | Genome-fragment | NA    | 0     |
| S15_v3_11876[full]        | 6691  | No  | NA   | 0  | 4              | Not-determined  | Genome-fragment | NA    | 3.42  |
| S5_v3_k141_82184[full]    | 5026  | No  | NA   | 0  | 0              | Low-quality     | Genome-fragment | 8.16  | 0     |
| S8_v3_k141_127109[full]   | 5027  | No  | NA   | 0  | 1              | Low-quality     | Genome-fragment | 6.99  | 0     |
| S15_v3_122174[full]       | 1337  | No  | NA   | 0  | 1              | Not-determined  | Genome-fragment | NA    | 0     |
| S11_extracted_k141_87172  | 5031  | No  | NA   | 4  | 0              | Low-quality     | Genome-fragment | NA    | 11.31 |
| S15_v3_12622[full]        | 1992  | No  | NA   | 0  | 2              | Not-determined  | Genome-fragment | NA    | 0     |
| S15_v3_12858[full]        | 2920  | No  | NA   | 0  | 0              | Not-determined  | Genome-fragment | NA    | 0     |
| S15_v3_13285[full]        | 4424  | No  | NA   | 0  | 0              | Not-determined  | Genome-fragment | NA    | 0     |
| S15_v3_13914[full]        | 3506  | No  | NA   | 0  | 3              | Not-determined  | Genome-fragment | NA    | 0     |
| S15_v3_13967[full]        | 2475  | No  | NA   | 0  | 1              | Not-determined  | Genome-fragment | NA    | 0     |
| S15_v3_13970[full]        | 8966  | No  | NA   | 0  | 0              | Not-determined  | Genome-fragment | NA    | 0     |
| S15_v3_14110[full]        | 3801  | No  | NA   | 0  | 1              | Not-determined  | Genome-fragment | NA    | 0     |
| S15_v3_14252[full]        | 1553  | No  | NA   | 0  | 1              | Not-determined  | Genome-fragment | NA    | 0     |
| S3_v3_k141_40007[full]    | 5032  | No  | NA   | 1  | 0              | Low-quality     | Genome-fragment | 3.51  | 0     |
| S15_v3_14866[full]        | 3588  | No  | NA   | 0  | 1              | Not-determined  | Genome-fragment | NA    | 0     |
| S15_v3_14882[full]        | 1435  | No  | NA   | 0  | 0              | Not-determined  | Genome-fragment | NA    | 0     |
| S15_v3_15117[full]        | 2141  | No  | NA   | 0  | 1              | Not-determined  | Genome-fragment | NA    | 0     |
| S15_v3_15196[full]        | 3974  | No  | NA   | 0  | 2              | Not-determined  | Genome-fragment | NA    | 0     |
| S3_v3_k141_88493[full]    | 5032  | No  | NA   | 3  | 0              | Low-quality     | Genome-fragment | 2.58  | 0     |
| S15_v3_15049[full]        | 1275  | No  | NA   | 0  | 2              | Not-determined  | Genome-fragment | NA    | 0     |
| S15_v3_16134[full]        | 2199  | No  | NA   | 0  | 2              | Not-determined  | Genome-fragment | NA    | 0     |
| S5_extracted_k141_141726  | 5032  | No  | NA   | 4  | 0              | Low-quality     | Genome-fragment | 14.56 | 0     |
| S15_v3_16199[full]        | 1339  | No  | NA   | 0  | 0              | Not-determined  | Genome-fragment | NA    | 0     |
| S15_v3_16231[full]        | 1496  | No  | NA   | 0  | 0              | Not-determined  | Genome-fragment | NA    | 0     |
| S7_extracted_42060        | 5032  | No  | NA   | 0  | 0              | Low-quality     | Genome-fragment | 8.13  | 0     |
| S15_v3_16367[full]        | 1317  | No  | NA   | 0  | 1              | Not-determined  | Genome-fragment | NA    | 0     |
| S14_v3_k141_21363[full]   | 5033  | No  | NA   | 3  | 1              | Low-quality     | Genome-fragment | 7.11  | 0     |
| S15_v3_16619[full]        | 2715  | No  | NA   | 0  | 2              | Not-determined  | Genome-fragment | NA    | 0     |
| S15_v3_17079[full]        | 2713  | No  | NA   | 0  | 0              | Not-determined  | Genome-fragment | NA    | 0     |
| S15_v3_17114[full]        | 1295  | No  | NA   | 0  | 5              | Not-determined  | Genome-fragment | NA    | 0     |
| S7_v3_37137[full]         | 5035  | No  | NA   | 5  | 0              | Low-quality     | Genome-fragment | 11.7  | 0     |
| S15_v3_17238[full]        | 29383 | No  | NA   | 0  | 22             | Not-determined  | Genome-fragment | NA    | 0     |
| S15_v3_17361[full]        | 6667  | No  | NA   | 6  | Not-determined | Genome-fragment | NA              | 0     |       |
| S11_v3_k141_13551[full]   | 5036  | No  | NA   | 1  | 0              | Low-quality     | Genome-fragment | 13.37 | 0     |
| S15_v3_17471[full]        | 1448  | No  | NA   | 0  | 0              | Not-determined  | Genome-fragment | NA    | 0     |
| S15_v3_17598[full]        | 6008  | No  | NA   | 5  | Not-determined | Genome-fragment | NA              | 0     |       |
| S15_v3_17664[full]        | 2837  | No  | NA   | 0  | 1              | Not-determined  | Genome-fragment | NA    | 0     |
| S5_v3_k141_145595[full]   | 5036  | No  | NA   | 0  | 2              | Low-quality     | Genome-fragment | 7.61  | 0     |
| S12_extracted_k141_22454  | 5042  | No  | NA   | 2  | 0              | Low-quality     | Genome-fragment | 9.62  | 0     |
| S3_v3_k141_122973[full]   | 5043  | No  | NA   | 0  | 0              | Low-quality     | Genome-fragment | 12.44 | 0     |
| S3_v3_k141_8414[full]     | 5044  | No  | NA   | 2  | 0              | Low-quality     | Genome-fragment | 12.72 | 0     |
| S15_v3_18522[full]        | 1349  | No  | NA   | 0  | 1              | Not-determined  | Genome-fragment | NA    | 0     |
| S15_v3_18587[full]        | 5055  | No  | NA   | 0  | 1              | Not-determined  | Genome-fragment | NA    | 0     |
| S8_v3_k141_103428[full]   | 5047  | No  | NA   | 0  | 0              | Low-quality     | Genome-fragment | 11.71 | 0     |
| S15_v3_18789[full]        | 2706  | No  | NA   | 0  | 0              | Not-determined  | Genome-fragment | NA    | 0     |
| S15_v3_18949[full]        | 5125  | No  | NA   | 0  | 1              | Not-determined  | Genome-fragment | NA    | 0     |
| S12_v3_k141_22825[full]   | 5048  | No  | NA   | 3  | 0              | Low-quality     | Genome-fragment | 5.59  | 0     |
| S3_v3_k141_53674[full]    | 5050  | No  | NA   | 0  | 3              | Low-quality     | Genome-fragment | 1.68  | 0     |
| S12_v3_5052[full]         | 5051  | No  | NA   | 0  | 0              | Low-quality     | Genome-fragment | 10.97 | 0     |
| S15_v3_19864[full]        | 1041  | No  | NA   | 0  | 1              | Not-determined  | Genome-fragment | NA    | 0     |
| S11_extracted_k141_87601  | 5052  | No  | NA   | 2  | 0              | Low-quality     | Genome-fragment | 11.05 | 0     |
| S15_v3_20445[full]        | 8095  | No  | NA   | 0  | 0              | Not-determined  | Genome-fragment | NA    | 0     |
| S15_v3_20606[full]        | 1183  | No  | NA   | 0  | 0              | Not-determined  | Genome-fragment | NA    | 0     |
| S15_v3_21078[full]        | 1885  | No  | NA   | 0  | 2              | Not-determined  | Genome-fragment | NA    | 0     |
| S15_v3_21222[full]        | 1442  | No  | NA   | 0  | 0              | Not-determined  | Genome-fragment | NA    | 0     |
| S11_extracted_k141_32223  | 5052  | No  | NA   | 2  | 1              | Low-quality     | Genome-fragment | 7.82  | 0     |
| S11_v3_k141_45177[full]   | 5054  | No  | NA   | 3  | 0              | Low-quality     | Genome-fragment | 12.02 | 0     |
| S15_v3_21519[full]        | 2496  | No  | NA   | 0  | 0              | Not-determined  | Genome-fragment | NA    | 0     |
| S3_extracted_k141_119377  | 5055  | No  | NA   | 1  | 0              | Low-quality     | Genome-fragment | 3.12  | 0     |
| S6_extracted_k141_30192   | 5055  | No  | NA   | 3  | 0              | Low-quality     | Genome-fragment | 7.48  | 0     |
| S7_extracted_1945         | 5057  | No  | NA   | 2  | 0              | Low-quality     | Genome-fragment | 23.11 | 0     |
| S9_extracted_k141_33193   | 5058  | No  | NA   | 6  | 0              | Low-quality     | Genome-fragment | 11.69 | 0     |
| S15_v3_22209[full]        | 2152  | No  | NA   | 2  | Not-determined | Genome-fragment | NA              | 0     |       |
| S7_extracted_22121        | 5058  | No  | NA   | 3  | 0              | Low-quality     | Genome-fragment | 9.17  | 0     |
| S15_v3_24176[full]        | 5058  | No  | NA   | 1  | 0              | Low-quality     | Genome-fragment | 6.36  | 0     |
| S15_v3_23250[full]        | 2319  | No  | NA   | 3  | Not-determined | Genome-fragment | NA              | 0     |       |
| S4_v3_VHSorSor_1584-cat_2 | 5059  | Yes | 4096 | 5  | 1              | Low-quality     | Genome-fragment | 11.07 | 19.04 |
| S15_v3_24480[full]        | 6320  | No  | NA   | 0  | 4              | Not-determined  | Genome-fragment | NA    | 0     |
| S15_v3_24792[full]        | 1151  | No  | NA   | 0  | 0              | Not-determined  | Genome-fragment | NA    | 0     |
| S15_v3_25104[full]        | 4315  | No  | NA   | 0  | 3              | Not-determined  | Genome-fragment | NA    | 0     |
| S15_v3_25195[full]        | 2720  | No  | NA   | 0  | 2              | Not-determined  | Genome-fragment | NA    | 0     |
| S15_v3_25291[full]        | 1235  | No  | NA   | 0  | 1              | Not-determined  | Genome-fragment | NA    | 0     |
| S15_v3_25481[full]        | 1259  | No  | NA   | 0  | 1              | Not-determined  | Genome-fragment | NA    | 0     |
| S9_v3_k141_42784[full]    | 5060  | No  | NA   | 0  | 2              | Low-quality     | Genome-fragment | 1.8   | 0     |
| S15_v3_25606[full]        | 2255  | No  | NA   | 0  | 0              | Not-determined  | Genome-fragment | NA    | 0     |
| S15_v3_25671[full]        | 9464  | No  | NA   | 5  | Not-determined | Genome-fragment | NA              | 0     |       |
| S15_v3_26015[full]        | 4600  | No  | NA   | 0  | 2              | Not-determined  | Genome-fragment | NA    | 0     |
| S11_extracted_k141_97842  | 5067  | No  | NA   | 1  | 0              | Low-quality     | Genome-fragment | 8.08  | 0     |
| S16_extracted_24240       | 5067  | No  | NA   | 0  | 1              | Low-quality     | Genome-fragment | 0.44  | 0     |
| S15_v3_26463[full]        | 1503  | No  | NA   | 0  | 2              | Not-determined  | Genome-fragment | NA    | 0     |
| S14_extracted_k141_99108  | 5070  | No  | NA   | 1  | 0              | Low-quality     | Genome-fragment | 11.98 | 0     |
| S5_extracted_k141_140377  | 5070  | No  | NA   | 2  | 0              | Low-quality     | Genome-fragment | 8.45  | 0     |
| S15_v3_27251[full]        | 2413  | No  | NA   | 0  | 2              | Not-determined  | Genome-fragment | NA    | 0     |
| S15_v3_27390[full]        | 3456  | No  | NA   | 0  | 0              | Not-determined  | Genome-fragment | NA    | 0     |
| S7_extracted_18402        | 5070  | No  | NA   | 4  | 0              | Low-quality     | Genome-fragment | 3.05  | 0     |
| S15_v3_27510[full]        | 5748  | No  | NA   | 16 | 2              | High-quality    | Genome-fragment | 92.69 | 0     |
| S15_v3_27530[full]        | 1471  | No  | NA   | 0  | 0              | Not-determined  | Genome-fragment | NA    | 0     |
| S15_v3_27682[full]        | 1088  | No  | NA   | 0  | 2              | Not-determined  | Genome-fragment | NA    | 0     |
| S15_v3_27813[full]        | 2395  | No  | NA   | 1  | Not-determined | Genome-fragment | NA              | 0     |       |
| S15_v3_27904[full]        | 1916  | No  | NA   | 0  | 0              | Not-determined  | Genome-fragment | NA    | 0     |
| S14_v3_k141_32896[full]   | 5071  | No  | NA   | 0  | 1              | Low-quality     | Genome-fragment | 8.9   | 0     |
| S14_v3_k141_98849[full]   | 5074  | No  | NA   | 2  | 0              | Low-quality     | Genome-fragment | 11.13 | 0     |
| S12_v3_k141_57429[full]   | 5074  | No  | NA   | 5  | 1              | Low-quality     | Genome-fragment | 10.03 | 0     |
| S15_v3_28329[full]        | 1197  | No  | NA   | 0  | 1              | Not-determined  | Genome-fragment | NA    | 0     |
| S17_v3_k141_156145[full]  | 5075  | No  | NA   | 0  | 5              | Low-quality     | Genome-fragment | 16.21 | 0     |
| S15_v3_29001[full]        | 1367  | No  | NA   | 0  | 3              | Not-determined  | Genome-fragment | NA    | 0     |
| S15_v3_29487[full]        | 1865  | No  | NA   | 0  | 0              | Not-determined  | Genome-fragment | NA    | 0     |
| S3_extracted_k141_9999    | 5075  | No  | NA   | 0  | 0              | Low-quality     | Genome-fragment | 11.65 | 0     |
| S15_v3_29615[full]        | 2386  | No  | NA   | 4  | Not-determined | Genome-fragment | NA              | 0     |       |
| S15_v3_29720[full]        | 9771  | No  | NA   | 0  | 8              | Not-determined  | Genome-fragment | NA    | 0     |
| S15_v3_29831[full]        | 20459 | No  | NA   | 0  | 13             | Not-determined  | Genome-fragment | NA    | 0     |
| S15_v3_30158[full]        | 10952 | No  | NA   | 0  | 5              | Not-determined  | Genome-fragment | NA    | 0     |
| S15_v3_30558[full]        | 3665  | No  | NA   | 0  | 3              | Not-determined  | Genome-fragment | NA    | 0     |
| S15_v3_30967[full]        | 3436  | No  | NA   | 0  | 3              | Not-determined  | Genome-fragment | NA    | 0     |
| S1_v3_k141_126659[full]   | 5076  | No  | NA   | 3  | 0              | Low-quality     | Genome-fragment | 12.43 | 0     |
| S15_v3_31155[full]        | 2655  | No  | NA   | 1  | Not-determined | Genome-fragment | NA              | 0     |       |
| S15_v3_31246[full]        | 3305  | No  | NA   | 0  | 0              | Not-determined  | Genome-fragment | NA    | 0     |
| S15_v3_31318[full]        | 2372  | No  | NA   | 0  | 2              | Not-determined  | Genome-fragment | NA    | 0     |
| S15_v3_31536[full]        | 5982  | No  | NA   | 0  | 2              | Not-determined  | Genome-fragment | NA    | 0     |
| S17_v3_k141_55043[full]   | 5078  | No  | NA   | 5  | 0              | Low-quality     | Genome-fragment | 15.39 | 0     |
| S14_v3_k141_84366[full]   | 5080  | No  | NA   | 2  | 0              | Low-quality     | Genome-fragment | 13.18 | 0     |
| S15_v3_k141_17087[full]   | 5080  | No  | NA   | 2  | 0              | Low-quality     | Genome-fragment | 10.44 | 0     |
| S9_extracted_k141_24484   | 5081  | No  | NA   | 0  | 0              | Low-quality     | Genome-fragment | 3.11  | 0     |
| S15_v3_31946[full]        | 8133  | No  | NA   | 0  | 1              | Not-determined  | Genome-fragment | NA    | 0     |
| S15_v3_32044[full]        | 1478  | No  | NA   | 0  | 0              | Not-determined  | Genome-fragment | NA    | 0     |
| S1_v3_k141_113070[full]   | 5081  | No  | NA   | 0  | 1              | Low-quality     | Genome-fragment | 5.84  | 0     |
| S15_v3_32136[full]        | 5682  | No  | NA   | 0  | 5              | Not-determined  | Genome-fragment | NA    | 0     |
| S15_v3_32204[full]        | 1438  | No  | NA   | 0  | 2              | Not-determined  | Genome-fragment | NA    | 0     |
| S14_extracted_k141_39637  | 5082  | No  | NA   | 0  | 1              | Low-quality     | Genome-fragment | 16.84 | 0     |
| S15_v3_32803[full]        | 14911 | No  | NA   | 0  | 10             | Not-determined  | Genome-fragment | NA    | 0     |
| S15_v3_32834[full]        | 2313  | No  | NA   | 0  | 2              | Not-determined  | Genome-fragment | NA    | 0     |
| S15_v3_33087[full]        | 3070  | No  | NA   | 0  | 0              | Not-determined  | Genome-fragment | NA    | 0     |
| S15_v3_33158[full]        | 2974  | No  | NA   | 0  | 1              | Not-determined  | Genome-fragment | NA    | 0     |
| S15_v3_33648[full]        | 7897  | No  | NA   | 0  | 4              | Not-determined  | Genome-fragment | NA    | 0     |
| S5_v3_k141_1064[full]     | 5083  | No  | NA   | 0  | 0              | Low-quality     | Genome-fragment | 11.78 | 0     |
| S15_v3_34108[full]        | 1848  | No  | NA   | 0  | 2              | Not-determined  | Genome-fragment | NA    | 0     |
| S15_v3_34193[full]        | 2221  | No  | NA   | 0  | 1              | Not-determined  | Genome-fragment | NA    | 0     |
| S15_v3_34381[full]        | 3516  | No  | NA   | 0  | 0              | Not-determined  | Genome-fragment | NA    | 0     |
| S16_v3_121710[full]       | 5085  | No  | NA   | 1  | 0              | Low-quality     | Genome-fragment | 3.42  | 0     |
| S15_v3_35445[full]        | 41163 | No  | NA   | 1  | 13             | Medium-quality  | Genome-fragment | 61.58 | 0     |
| S5_v3_k141_71009[full]    | 5086  | No  | NA   | 2  | 1              | Low-quality     | Genome-fragment | 14.52 | 0     |
| S15_v3_35473[full]        | 3000  | No  | NA   | 0  | 1              | Not-determined  | Genome-fragment | NA    | 0     |
| S15_v3_35544[full]        | 2199  | No  | NA   | 0  | 0              | Not-determined  | Genome-fragment | NA    | 0     |
| S14_v3_k141_27630[full]   | 5089  | No  | NA   | 4  | 0              | Low-quality     | Genome-fragment | 11.93 | 0     |
| S12_v3_k141_44833[full]   | 5089  | No  | NA   | 4  | 0              | Low-quality     | Genome-fragment | 14.03 | 0     |
| S15_v3_35861[full]        | 2383  | No  | NA   | 0  | 0              | Not-determined  | Genome-fragment | NA    | 0     |
| S15_v3_36010[full]        | 1904  | No  | NA   | 0  | 1              | Not-determined  | Genome-fragment | NA    | 0     |
| S14_v3_k141_77569[full]   | 5090  | No  | NA   | 1  | 0              | Low-quality     | Genome-fragment | 8.83  | 0     |
| S15_v3_36194[full]        | 3261  | No  | NA   | 1  | Not-determined | Genome-fragment | NA              | 0     |       |
| S9_v3_k141_35724[full]    | 5092  | No  | NA   | 5  | 0              | Low-quality     | Genome-fragment | 11.78 | 0     |
| S16_extracted_5           |       |     |      |    |                |                 |                 |       |       |



|                           |       |     |      |      |   |                 |                 |       |       |
|---------------------------|-------|-----|------|------|---|-----------------|-----------------|-------|-------|
| S14_vo_k141_307641 full   | 5110  | No  | NA   | 1    | 0 | Low-quality     | Genome-fragment | 8.62  | 0     |
| S15_vo_426441 full        | 7479  | No  | NA   | 0    | 4 | Not-determined  | Genome-fragment | NA    | 0     |
| S15_vo_426801 full        | 2299  | No  | NA   | 0    | 0 | Not-determined  | Genome-fragment | NA    | 0     |
| S15_vo_427251 full        | 4959  | No  | NA   | 0    | 0 | Not-determined  | Genome-fragment | NA    | 0     |
| S15_vo_428051 full        | 1280  | No  | NA   | 0    | 1 | Not-determined  | Genome-fragment | NA    | 0     |
| S15_vo_438721 full        | 8695  | No  | NA   | 0    | 2 | Not-determined  | Genome-fragment | NA    | 0     |
| S15_vo_430171 full        | 11115 | No  | NA   | 0    | 4 | Not-determined  | Genome-fragment | NA    | 0     |
| S15_vo_434541 full        | 1841  | No  | NA   | 0    | 0 | Not-determined  | Genome-fragment | NA    | 0     |
| S5_vo_k141_796681 full    | 5111  | No  | NA   | 0    | 1 | Low-quality     | Genome-fragment | 4.94  | 0     |
| S15_vo_437091 full        | 2521  | No  | NA   | 0    | 2 | Not-determined  | Genome-fragment | NA    | 0     |
| S15_vo_438041 full        | 1320  | No  | NA   | 0    | 0 | Not-determined  | Genome-fragment | NA    | 0     |
| S15_vo_439111 full        | 44889 | Yes | NA   | 5    | 5 | Medium-quality  | Genome-fragment | 58.36 | 24.09 |
| S15_vo_443081 full        | 4003  | No  | NA   | 0    | 2 | Not-determined  | Genome-fragment | NA    | 0     |
| S15_extracted_135627      | 5111  | No  | NA   | 0    | 2 | Low-quality     | Genome-fragment | 2.29  | 0     |
| S10_extracted_75424       | 5111  | No  | NA   | 2    | 0 | Low-quality     | Genome-fragment | 8.08  | 0     |
| S3_extracted_k141_55879   | 5112  | No  | NA   | 5    | 0 | Genome-fragment | Genome-fragment | 12.85 | 0     |
| S8_extracted_k141_342151  | 5112  | No  | NA   | 4    | 0 | Low-quality     | Genome-fragment | 16.24 | 0     |
| S15_vo_453801 full        | 3086  | No  | NA   | 0    | 2 | Not-determined  | Genome-fragment | NA    | 0     |
| S17_extracted_k141_5808   | 5114  | No  | NA   | 0    | 1 | Low-quality     | Genome-fragment | 2.75  | 0     |
| S1_vo_k141_29051 full     | 5115  | No  | NA   | 3    | 0 | Low-quality     | Genome-fragment | 11.47 | 0     |
| S5_vo_k141_1171401 full   | 5117  | Yes | NA   | 1    | 1 | Low-quality     | Genome-fragment | 7.06  | 8.83  |
| S15_vo_462281 full        | 4832  | No  | NA   | 0    | 0 | Not-determined  | Genome-fragment | NA    | 0     |
| S15_extracted_62013       | 5119  | No  | NA   | 1    | 0 | Low-quality     | Genome-fragment | 14.57 | 0     |
| S15_vo_463311 full        | 1405  | No  | NA   | 0    | 1 | Not-determined  | Genome-fragment | NA    | 0     |
| S15_vo_463361 full        | 1582  | No  | NA   | 0    | 2 | Not-determined  | Genome-fragment | NA    | 0     |
| S15_vo_463551 full        | 7793  | No  | NA   | 0    | 7 | Not-determined  | Genome-fragment | NA    | 0     |
| S15_vo_464781 full        | 1053  | No  | NA   | 0    | 0 | Not-determined  | Genome-fragment | NA    | 0     |
| S15_vo_468381 full        | 1514  | No  | NA   | 0    | 1 | Not-determined  | Genome-fragment | NA    | 0     |
| S17_vo_k141_1748071 full  | 5120  | No  | NA   | 0    | 0 | Low-quality     | Genome-fragment | 7.69  | 0     |
| S15_vo_473161 full        | 2221  | No  | NA   | 0    | 0 | Not-determined  | Genome-fragment | NA    | 0     |
| S15_vo_474021 full        | 2578  | No  | NA   | 0    | 2 | Not-determined  | Genome-fragment | NA    | 0     |
| S14_extracted_k141_116486 | 5120  | No  | NA   | 1    | 1 | Low-quality     | Genome-fragment | 2.41  | 0     |
| S15_vo_483321 full        | 1175  | No  | NA   | 0    | 3 | Not-determined  | Genome-fragment | NA    | 0     |
| S10_extracted_16526       | 5120  | No  | NA   | 0    | 1 | Low-quality     | Genome-fragment | 4.16  | 0     |
| S15_vo_48631 full         | 1751  | No  | NA   | 0    | 0 | Not-determined  | Genome-fragment | NA    | 0     |
| S15_vo_486671 full        | 4095  | No  | NA   | 1    | 1 | Not-determined  | Genome-fragment | NA    | 0     |
| S15_vo_489301 full        | 1823  | No  | NA   | 0    | 1 | Not-determined  | Genome-fragment | NA    | 0     |
| S8_extracted_k141_1564    | 5120  | Yes | NA   | 4    | 1 | Low-quality     | Genome-fragment | 10.21 | 15.1  |
| S15_vo_490041 full        | 1326  | No  | NA   | 0    | 0 | Not-determined  | Genome-fragment | NA    | 0     |
| S13_vo_1506861 full       | 5121  | Yes | NA   | 1    | 1 | Low-quality     | Genome-fragment | 2.1   | 38.9  |
| S15_vo_499931 full        | 1139  | No  | NA   | 0    | 0 | Not-determined  | Genome-fragment | NA    | 0     |
| S1_extracted_k141_149054  | 5121  | No  | NA   | 1    | 1 | Low-quality     | Genome-fragment | 10.48 | 0     |
| S8_extracted_k141_102305  | 5121  | No  | NA   | 0    | 2 | Low-quality     | Genome-fragment | 2.18  | 0     |
| S15_vo_509041 full        | 3399  | No  | NA   | 0    | 2 | Not-determined  | Genome-fragment | NA    | 0     |
| S15_vo_509471 full        | 1570  | No  | NA   | 0    | 2 | Not-determined  | Genome-fragment | NA    | 0     |
| S4_extracted_10730        | 5122  | No  | NA   | 0    | 4 | Low-quality     | Genome-fragment | 1.57  | 0     |
| S15_vo_510521 full        | 6012  | No  | NA   | 0    | 1 | Not-determined  | Genome-fragment | NA    | 0     |
| S15_vo_512501 full        | 1976  | No  | NA   | 0    | 0 | Not-determined  | Genome-fragment | NA    | 0     |
| S5_vo_k141_1240081 full   | 5123  | No  | NA   | 0    | 0 | Low-quality     | Genome-fragment | 12.86 | 0     |
| S5_vo_k141_53891 full     | 5124  | No  | NA   | 1    | 1 | Low-quality     | Genome-fragment | 3.32  | 0     |
| S15_vo_513781 full        | 4413  | No  | NA   | 0    | 1 | Not-determined  | Genome-fragment | NA    | 0     |
| S15_vo_517801 full        | 2128  | No  | NA   | 1    | 1 | Not-determined  | Genome-fragment | NA    | 0     |
| S15_vo_517981 full        | 1895  | No  | NA   | 0    | 1 | Not-determined  | Genome-fragment | NA    | 0     |
| S8_extracted_k141_81003   | 5128  | No  | NA   | 0    | 1 | Low-quality     | Genome-fragment | 10.89 | 0     |
| S7_vo_1289651 full        | 5129  | No  | NA   | 1    | 0 | Low-quality     | Genome-fragment | 11.42 | 0     |
| S15_vo_520111 full        | 4832  | No  | NA   | 1    | 1 | Not-determined  | Genome-fragment | NA    | 0     |
| S15_extracted_63429       | 5129  | No  | NA   | 3    | 0 | Low-quality     | Genome-fragment | 9.67  | 0     |
| S15_vo_523111 full        | 6981  | No  | NA   | 0    | 5 | Not-determined  | Genome-fragment | NA    | 0     |
| S15_vo_524051 full        | 1107  | No  | NA   | 0    | 2 | Not-determined  | Genome-fragment | NA    | 0     |
| S15_vo_526531 full        | 5480  | No  | NA   | 0    | 1 | Not-determined  | Genome-fragment | NA    | 0     |
| S12_vo_k141_1719811 full  | 5129  | No  | NA   | 0    | 0 | Low-quality     | Genome-fragment | 8.01  | 0     |
| S14_vo_k141_125401 full   | 5130  | No  | NA   | 1    | 1 | Low-quality     | Genome-fragment | 13.22 | 0     |
| S15_vo_532111 full        | 7418  | No  | NA   | 0    | 3 | Not-determined  | Genome-fragment | NA    | 0     |
| S1_vo_k141_39651 full     | 5131  | Yes | NA   | 1    | 1 | Low-quality     | Genome-fragment | 2.45  | 68.99 |
| S16_extracted_29825       | 5135  | Yes | NA   | 2209 | 1 | Low-quality     | Genome-fragment | 3.55  | 56.98 |
| S3_extracted_k141_81004   | 5136  | No  | NA   | 2    | 0 | Low-quality     | Genome-fragment | 1.57  | 0     |
| S15_vo_540491 full        | 2112  | No  | NA   | 0    | 0 | Not-determined  | Genome-fragment | NA    | 0     |
| S4_extracted_6320         | 5139  | No  | NA   | 7    | 0 | Low-quality     | Genome-fragment | 13.83 | 0     |
| S15_vo_540751 full        | 3242  | No  | NA   | 1    | 1 | Not-determined  | Genome-fragment | NA    | 0     |
| S15_vo_547671 full        | 2094  | No  | NA   | 0    | 1 | Not-determined  | Genome-fragment | NA    | 0     |
| S16_vo_66571 full         | 5142  | No  | NA   | 0    | 1 | Low-quality     | Genome-fragment | 9.17  | 0     |
| S15_vo_550621 full        | 5182  | No  | NA   | 3    | 1 | Not-determined  | Genome-fragment | NA    | 0     |
| S15_vo_550711 full        | 1726  | No  | NA   | 0    | 1 | Not-determined  | Genome-fragment | NA    | 0     |
| S15_vo_550791 full        | 1809  | No  | NA   | 0    | 1 | Not-determined  | Genome-fragment | NA    | 0     |
| S15_vo_551961 full        | 1432  | No  | NA   | 0    | 0 | Not-determined  | Genome-fragment | NA    | 0     |
| S10_extracted_19843       | 5143  | No  | NA   | 4    | 0 | Low-quality     | Genome-fragment | 11.67 | 0     |
| S11_vo_k141_649531 full   | 5145  | No  | NA   | 4    | 0 | Low-quality     | Genome-fragment | 12.88 | 0     |
| S15_vo_561121 full        | 6611  | No  | NA   | 0    | 3 | Not-determined  | Genome-fragment | NA    | 0     |
| S9_vo_k141_1244313 full   | 5147  | No  | NA   | 0    | 0 | Low-quality     | Genome-fragment | 11.43 | 0     |
| S15_vo_562721 full        | 2727  | No  | NA   | 0    | 2 | Not-determined  | Genome-fragment | NA    | 0     |
| S15_vo_569611 full        | 1330  | No  | NA   | 0    | 0 | Not-determined  | Genome-fragment | NA    | 0     |
| S7_extracted_25589        | 5147  | No  | NA   | 0    | 0 | Low-quality     | Genome-fragment | 6.83  | 0     |
| S15_vo_570181 full        | 1204  | No  | NA   | 0    | 1 | Not-determined  | Genome-fragment | NA    | 0     |
| S15_vo_573531 full        | 3407  | No  | NA   | 0    | 1 | Not-determined  | Genome-fragment | NA    | 0     |
| S6_extracted_k141_48299   | 5147  | No  | NA   | 2    | 0 | Low-quality     | Genome-fragment | 5.44  | 0     |
| S11_extracted_k141_8926   | 5148  | No  | NA   | 1    | 0 | Low-quality     | Genome-fragment | 8.99  | 0     |
| S15_vo_575721 full        | 1505  | No  | NA   | 0    | 1 | Not-determined  | Genome-fragment | NA    | 0     |
| S15_vo_578911 full        | 6048  | No  | NA   | 0    | 5 | Not-determined  | Genome-fragment | NA    | 0     |
| S16_extracted_138835      | 5148  | No  | NA   | 2    | 1 | Low-quality     | Genome-fragment | 0.44  | 0     |
| S13_vo_1044051 full       | 5150  | No  | NA   | 0    | 1 | Low-quality     | Genome-fragment | 10.42 | 0     |
| S15_vo_586291 full        | 1458  | No  | NA   | 0    | 1 | Not-determined  | Genome-fragment | NA    | 0     |
| S15_vo_586381 full        | 1734  | No  | NA   | 0    | 1 | Not-determined  | Genome-fragment | NA    | 0     |
| S15_vo_588361 full        | 3926  | No  | NA   | 0    | 2 | Not-determined  | Genome-fragment | NA    | 0     |
| S15_vo_589171 full        | 1354  | No  | NA   | 0    | 0 | Not-determined  | Genome-fragment | NA    | 0     |
| S10_extracted_118253      | 5150  | No  | NA   | 0    | 0 | Low-quality     | Genome-fragment | 12.23 | 0     |
| S15_vo_594881 full        | 3384  | No  | NA   | 4    | 2 | Not-determined  | Genome-fragment | NA    | 0     |
| S5_vo_k141_1043971 full   | 5153  | No  | NA   | 4    | 0 | Low-quality     | Genome-fragment | 11.27 | 0     |
| S15_vo_597041 full        | 3285  | No  | NA   | 0    | 1 | Not-determined  | Genome-fragment | NA    | 0     |
| S15_vo_600011 full        | 1372  | No  | NA   | 0    | 2 | Not-determined  | Genome-fragment | NA    | 0     |
| S1_vo_k141_273841 full    | 5154  | No  | NA   | 0    | 2 | Low-quality     | Genome-fragment | 2.83  | 0     |
| S15_vo_608311 full        | 3312  | No  | NA   | 0    | 2 | Not-determined  | Genome-fragment | NA    | 0     |
| S3_extracted_k141_47333   | 5159  | No  | NA   | 0    | 0 | Low-quality     | Genome-fragment | 11.98 | 0     |
| S15_vo_613371 full        | 2980  | No  | NA   | 0    | 0 | Not-determined  | Genome-fragment | NA    | 0     |
| S15_extracted_77162       | 5161  | No  | NA   | 0    | 2 | Low-quality     | Genome-fragment | 4.82  | 0     |
| S9_extracted_k141_48100   | 5162  | No  | NA   | 0    | 0 | Low-quality     | Genome-fragment | 11.81 | 0     |
| S5_vo_k141_1125151 full   | 5166  | No  | NA   | 0    | 0 | Low-quality     | Genome-fragment | 8.63  | 0     |
| S16_extracted_38959       | 5169  | No  | NA   | 0    | 4 | Low-quality     | Genome-fragment | 1.43  | 0     |
| S3_extracted_k141_122054  | 5171  | No  | NA   | 0    | 2 | Low-quality     | Genome-fragment | 8.86  | 0     |
| S15_vo_620391 full        | 9663  | No  | NA   | 0    | 1 | Not-determined  | Genome-fragment | NA    | 0     |
| S14_vo_k141_51011 full    | 5173  | No  | NA   | 0    | 3 | Low-quality     | Genome-fragment | 4.19  | 0     |
| S15_vo_621781 full        | 2164  | No  | NA   | 0    | 2 | Not-determined  | Genome-fragment | NA    | 0     |
| S15_vo_623541 full        | 1594  | No  | NA   | 0    | 0 | Not-determined  | Genome-fragment | NA    | 0     |
| S15_vo_626381 full        | 3414  | No  | NA   | 0    | 2 | Not-determined  | Genome-fragment | NA    | 0     |
| S4_extracted_8060         | 5173  | No  | NA   | 0    | 0 | Low-quality     | Genome-fragment | 12.08 | 0     |
| S15_vo_620531 full        | 1128  | No  | NA   | 1    | 1 | Low-quality     | Genome-fragment | 10.39 | 0     |
| S5_vo_k141_315871 full    | 5174  | No  | NA   | 1    | 0 | Low-quality     | Genome-fragment | NA    | 0     |
| S15_vo_635681 full        | 1651  | No  | NA   | 0    | 2 | Not-determined  | Genome-fragment | NA    | 0     |
| S15_extracted_2543        | 5175  | No  | NA   | 5    | 0 | Low-quality     | Genome-fragment | 3.09  | 0     |
| S15_vo_639171 full        | 1106  | No  | NA   | 0    | 1 | Not-determined  | Genome-fragment | NA    | 0     |
| S5_vo_k141_96151 full     | 5176  | No  | NA   | 3    | 1 | Low-quality     | Genome-fragment | 14.89 | 0     |
| S15_vo_639991 full        | 2062  | No  | NA   | 0    | 1 | Not-determined  | Genome-fragment | NA    | 0     |
| S14_vo_k141_1411313 full  | 5178  | No  | NA   | 0    | 0 | Low-quality     | Genome-fragment | 5.45  | 0     |
| S3_vo_k141_55401 full     | 5179  | Yes | NA   | 1127 | 1 | Low-quality     | Genome-fragment | 1.07  | 78.24 |
| S15_vo_640431 full        | 1568  | No  | NA   | 0    | 0 | Not-determined  | Genome-fragment | NA    | 0     |
| S15_vo_640661 full        | 5779  | No  | NA   | 2    | 2 | Not-determined  | Genome-fragment | NA    | 0     |
| S15_vo_642361 full        | 1925  | No  | NA   | 0    | 0 | Not-determined  | Genome-fragment | NA    | 0     |
| S15_vo_644171 full        | 7990  | No  | NA   | 0    | 2 | Not-determined  | Genome-fragment | NA    | 0     |
| S15_vo_645201 full        | 1341  | No  | NA   | 0    | 0 | Not-determined  | Genome-fragment | NA    | 0     |
| S15_vo_647141 full        | 3099  | No  | NA   | 0    | 0 | Not-determined  | Genome-fragment | NA    | 0     |
| S8_vo_k141_580071 full    | 5180  | No  | NA   | 2    | 0 | Low-quality     | Genome-fragment | 8.34  | 0     |
| S5_extracted_k141_42494   | 5182  | No  | NA   | 3    | 0 | Low-quality     | Genome-fragment | 8.12  | 0     |
| S15_vo_652481 full        | 10971 | No  | NA   | 0    | 1 | Not-determined  | Genome-fragment | NA    | 0     |
| S15_vo_1452831 full       | 5183  | No  | NA   | 0    | 4 | Low-quality     | Genome-fragment | 4.87  | 0     |
| S15_vo_654281 full        | 1118  | No  | NA   | 0    | 1 | Not-determined  | Genome-fragment | NA    | 0     |
| S17_vo_k141_101621 full   | 5185  | No  | NA   | 0    | 0 | Low-quality     | Genome-fragment | 9.45  | 0     |
| S15_vo_659481 full        | 1362  | No  | NA   | 0    | 0 | Not-determined  | Genome-fragment | NA    | 0     |
| S15_vo_659491 full        | 3168  | No  | NA   | 0    | 1 | Not-determined  | Genome-fragment | NA    | 0     |
| S11_extracted_k141_15698  | 5185  | No  | NA   | 0    | 0 | Low-quality     | Genome-fragment | 8.51  | 0     |
| S15_vo_660771 full        | 1356  | No  | NA   | 0    | 0 | Not-determined  | Genome-fragment | NA    | 0     |
| S15_vo_662691 full        | 1311  | No  | NA   | 0    | 0 | Not-determined  | Genome-fragment | NA    | 0     |
| S15_vo_667941 full        | 1486  | No  | NA   | 0    | 0 | Not-determined  | Genome-fragment | NA    | 0     |
| S15_vo_671781 full        | 2423  | No  | NA   | 0    | 1 | Not-determined  | Genome-fragment | NA    | 0     |
| S14_vo_k141_938201 full   | 5186  | No  | NA   | 3    | 0 | Low-quality     | Genome-fragment | 10.11 | 0     |
| S4_extracted_24258        | 5186  | No  | NA   | 2    | 0 | Low-quality     | Genome-fragment | 12.46 | 0     |
| S15_vo_684181 full        | 2076  | No  | NA</ |      |   |                 |                 |       |       |



|                           |             |       |     |      |    |                |                 |                 |      |       |       |
|---------------------------|-------------|-------|-----|------|----|----------------|-----------------|-----------------|------|-------|-------|
| S15_vx_72793              | [full]      | 1893  | No  | NA   | 0  | 2              | Not-determined  | Genome-fragment | NA   | 0     | 0     |
| S15_vx_73475              | [full]      | 1943  | No  | NA   | 0  | 0              | Not-determined  | Genome-fragment | NA   | 0     | 0     |
| S15_vx_73556              | [full]      | 1033  | No  | NA   | 0  | 0              | Not-determined  | Genome-fragment | NA   | 0     | 0     |
| S16_vx_73593              | [full]      | 5214  | No  | NA   | 2  | 0              | Low-quality     | Genome-fragment | NA   | 8.64  | 0     |
| S15_vx_73789              | [full]      | 1304  | No  | NA   | 0  | 0              | Not-determined  | Genome-fragment | NA   | 0     | 0     |
| S11_vx_k141_74071         | [full]      | 5216  | No  | NA   | 3  | 0              | Low-quality     | Genome-fragment | NA   | 8.87  | 0     |
| S15_vx_74327              | [full]      | 2600  | No  | NA   | 0  | 1              | Not-determined  | Genome-fragment | NA   | 0     | 0     |
| S11_extracted_k141_154205 |             | 5216  | No  | NA   | 4  | 0              | Low-quality     | Genome-fragment | NA   | 11.75 | 0     |
| S3_extracted_k141_68297   |             | 5216  | No  | NA   | 0  | 0              | Low-quality     | Genome-fragment | NA   | 3.4   | 0     |
| S15_vx_74463              | [full]      | 3083  | No  | NA   | 0  | 0              | Not-determined  | Genome-fragment | NA   | 0     | 0     |
| S15_vx_74477              | [full]      | 1465  | No  | NA   | 0  | 2              | Not-determined  | Genome-fragment | NA   | 0     | 0     |
| S8_vx_k141_727950         | [full]      | 5217  | No  | NA   | 0  | 0              | Low-quality     | Genome-fragment | NA   | 13.44 | 0     |
| S7_vx_66017               | [full]      | 5218  | Yes | 3319 | 1  | 2              | Low-quality     | Genome-fragment | NA   | 9.41  | 36.39 |
| S7_vx_19007               | [full]      | 5221  | No  | NA   | 3  | 0              | Low-quality     | Genome-fragment | NA   | 11.78 | 0     |
| S15_vx_75474              | [full]      | 12193 | No  | NA   | 0  | 2              | Not-determined  | Genome-fragment | NA   | 0     | 0     |
| S15_vx_75507              | [full]      | 7610  | No  | NA   | 0  | 3              | Not-determined  | Genome-fragment | NA   | 0     | 0     |
| S11_extracted_k141_39340  |             | 5222  | No  | NA   | 0  | 0              | Low-quality     | Genome-fragment | NA   | 5.56  | 0     |
| S7_extracted_1744         |             | 5223  | No  | NA   | 1  | 0              | Low-quality     | Genome-fragment | NA   | 10.95 | 0     |
| S11_extracted_k141_43216  |             | 5224  | No  | NA   | 0  | 3              | Low-quality     | Genome-fragment | NA   | 2.56  | 0     |
| S7_extracted_29891        |             | 5225  | No  | NA   | 2  | 0              | Low-quality     | Genome-fragment | NA   | 8.47  | 0     |
| S16_vx_82779              | [full]      | 5228  | No  | NA   | 0  | 2              | Low-quality     | Genome-fragment | NA   | 7.87  | 0     |
| S12_vx_k141_162275        | [full]      | 5229  | No  | NA   | 0  | 0              | Low-quality     | Genome-fragment | NA   | 12.05 | 0     |
| S16_vx_165240             | [full]      | 5233  | No  | NA   | 0  | 4              | Low-quality     | Genome-fragment | NA   | 1.23  | 0     |
| S8_extracted_k141_198154  |             | 5233  | Yes | 1470 | 1  | 3              | Low-quality     | Genome-fragment | NA   | 0.58  | 71.91 |
| S15_vx_77065              | [full]      | 1009  | No  | NA   | 0  | 0              | Not-determined  | Genome-fragment | NA   | 0     | 0     |
| S15_vx_77074              | [full]      | 1310  | No  | NA   | 0  | 0              | Not-determined  | Genome-fragment | NA   | 0     | 0     |
| S15_vx_77154              | [full]      | 18949 | No  | NA   | 0  | 3              | Not-determined  | Genome-fragment | NA   | 0     | 0     |
| S15_vx_77171              | [full]      | 10593 | No  | NA   | 0  | 3              | Not-determined  | Genome-fragment | NA   | 0     | 0     |
| S15_vx_77255              | [full]      | 1502  | No  | NA   | 0  | 3              | Not-determined  | Genome-fragment | NA   | 0     | 0     |
| S15_vx_14765              | [0_partial] | 11939 | No  | NA   | 0  | 8              | Not-determined  | Genome-fragment | NA   | 0     | 0     |
| S14_vx_k141_105404        | [full]      | 5236  | No  | NA   | 5  | 0              | Low-quality     | Genome-fragment | NA   | 11.88 | 0     |
| S15_vx_42979              | [0_partial] | 21026 | No  | NA   | 7  | Not-determined | Genome-fragment | NA              | 6.49 | 0     |       |
| S16_extracted_1044        |             | 5236  | No  | NA   | 1  | 0              | Low-quality     | Genome-fragment | NA   | 0     | 0     |
| S10_extracted_78527       |             | 5237  | No  | NA   | 2  | 0              | Low-quality     | Genome-fragment | NA   | 2.35  | 0     |
| S15_vx_4970               | [02gene]    | 1013  | No  | NA   | 0  | 0              | Not-determined  | Genome-fragment | NA   | 0     | 0     |
| S5_vx_k141_118666         | [full]      | 5240  | No  | NA   | 0  | 0              | Low-quality     | Genome-fragment | NA   | 14.49 | 0     |
| S15_vx_7112               | [02gene]    | 1014  | No  | NA   | 0  | 0              | Not-determined  | Genome-fragment | NA   | 0     | 0     |
| S3_extracted_k141_29633   |             | 5241  | No  | NA   | 0  | 1              | Low-quality     | Genome-fragment | NA   | 6.64  | 0     |
| S11_extracted_k141_114042 |             | 5243  | No  | NA   | 0  | 0              | Low-quality     | Genome-fragment | NA   | 3.81  | 0     |
| S5_vx_k141_48886          | [full]      | 5245  | No  | NA   | 8  | 0              | Low-quality     | Genome-fragment | NA   | 11.33 | 0     |
| S15_vx_16676              | [02gene]    | 1346  | No  | NA   | 0  | 0              | Not-determined  | Genome-fragment | NA   | 0     | 0     |
| S10_extracted_61854       |             | 5246  | No  | NA   | 0  | 0              | Low-quality     | Genome-fragment | NA   | 8.07  | 0     |
| S15_vx_26294              | [02gene]    | 2955  | No  | NA   | 0  | 0              | Not-determined  | Genome-fragment | NA   | 0     | 0     |
| S11_vx_k141_46480         | [full]      | 5248  | No  | NA   | 4  | 0              | Low-quality     | Genome-fragment | NA   | 12.53 | 0     |
| S16_extracted_95174       |             | 5248  | No  | NA   | 0  | 1              | Low-quality     | Genome-fragment | NA   | 2.34  | 0     |
| S15_vx_31481              | [02gene]    | 1158  | No  | NA   | 3  | Not-determined | Genome-fragment | NA              | 0.43 | 79.87 |       |
| S16_extracted_27890       |             | 5250  | No  | NA   | 2  | 0              | Low-quality     | Genome-fragment | NA   | 9.11  | 0     |
| S11_vx_k141_3900          | [full]      | 5253  | No  | NA   | 0  | 4              | Low-quality     | Genome-fragment | NA   | 8.13  | 0     |
| S15_vx_41955              | [02gene]    | 1600  | No  | NA   | 0  | 2              | Not-determined  | Genome-fragment | NA   | 0     | 0     |
| S9_vx_k141_17112          | [full]      | 5258  | No  | NA   | 5  | 0              | Low-quality     | Genome-fragment | NA   | 12.86 | 0     |
| S15_vx_42837              | [02gene]    | 1032  | No  | NA   | 0  | 0              | Not-determined  | Genome-fragment | NA   | 8.7   | 0     |
| S2_extracted_k141_47221   |             | 5258  | No  | NA   | 0  | 0              | Low-quality     | Genome-fragment | NA   | 8.34  | 28.24 |
| S8_vx_k141_63552          | [full]      | 5258  | Yes | 3773 | 4  | 2              | Low-quality     | Genome-fragment | NA   | 8.7   | 0     |
| S17_vx_k141_92886         | [full]      | 5259  | No  | NA   | 0  | 0              | Low-quality     | Genome-fragment | NA   | 6.66  | 0     |
| S2_vx_k141_51993          | [full]      | 5260  | Yes | 1059 | 1  | 3              | Low-quality     | Genome-fragment | NA   | 0.43  | 79.87 |
| S15_vx_55414              | [02gene]    | 1768  | No  | NA   | 0  | 1              | Not-determined  | Genome-fragment | NA   | 0     | 0     |
| S7_vx_71101               | [full]      | 5260  | No  | NA   | 0  | 4              | Low-quality     | Genome-fragment | NA   | 3.77  | 0     |
| S12_vx_k141_138042        | [full]      | 5261  | No  | NA   | 3  | 0              | Low-quality     | Genome-fragment | NA   | 10.03 | 0     |
| S15_vx_62741              | [02gene]    | 3627  | No  | NA   | 0  | 1              | Not-determined  | Genome-fragment | NA   | 0     | 0     |
| S14_vx_k141_38076         | [full]      | 5262  | No  | NA   | 3  | 0              | Low-quality     | Genome-fragment | NA   | 17.39 | 0     |
| S11_extracted_k141_52303  |             | 5263  | No  | NA   | 0  | 0              | Low-quality     | Genome-fragment | NA   | 12.53 | 0     |
| S11_extracted_k141_130676 |             | 5266  | Yes | 4832 | 0  | 1              | Low-quality     | Genome-fragment | NA   | 7.63  | 8.24  |
| S11_extracted_k141_82062  |             | 5268  | No  | NA   | 4  | 0              | Low-quality     | Genome-fragment | NA   | 13.45 | 0     |
| S2_extracted_k141_9472    |             | 1074  | No  | NA   | 0  | 1              | Not-determined  | Genome-fragment | NA   | 0     | 0     |
| S2_extracted_k141_21      |             | 6073  | No  | NA   | 3  | Not-determined | Genome-fragment | NA              | 0    | 0     |       |
| S7_vx_134069              | [full]      | 5268  | Yes | 2642 | 1  | 1              | Low-quality     | Genome-fragment | NA   | 3.27  | 49.85 |
| S2_extracted_k141_2742    |             | 1139  | No  | NA   | 0  | 2              | Not-determined  | Genome-fragment | NA   | 0     | 0     |
| S2_extracted_k141_12202   |             | 1145  | No  | NA   | 0  | 0              | Not-determined  | Genome-fragment | NA   | 0     | 0     |
| S2_extracted_k141_17612   |             | 1359  | No  | NA   | 0  | 0              | Not-determined  | Genome-fragment | NA   | 0     | 0     |
| S2_extracted_k141_6793    |             | 1511  | No  | NA   | 0  | 0              | Not-determined  | Genome-fragment | NA   | 0     | 0     |
| S11_vx_k141_41243         | [full]      | 5273  | No  | NA   | 3  | 0              | Low-quality     | Genome-fragment | NA   | 5.91  | 0     |
| S3_vx_k141_30456          | [full]      | 5273  | No  | NA   | 0  | 0              | Low-quality     | Genome-fragment | NA   | 12.29 | 0     |
| S2_extracted_k141_6802    |             | 1037  | No  | NA   | 0  | 0              | Not-determined  | Genome-fragment | NA   | 0     | 0     |
| S16_vx_13161              | [full]      | 5273  | No  | NA   | 0  | 3              | Low-quality     | Genome-fragment | NA   | 6.25  | 0     |
| S2_extracted_k141_17635   |             | 1141  | No  | NA   | 0  | 1              | Not-determined  | Genome-fragment | NA   | 0     | 0     |
| S2_extracted_k141_8176    |             | 2049  | No  | NA   | 0  | 1              | Not-determined  | Genome-fragment | NA   | 0     | 0     |
| S2_extracted_k141_60      |             | 6498  | No  | NA   | 0  | 4              | Not-determined  | Genome-fragment | NA   | 0     | 0     |
| S14_extracted_k141_107699 |             | 5276  | Yes | 2485 | 1  | 2              | Low-quality     | Genome-fragment | NA   | 3.76  | 52.9  |
| S16_vx_4870               | [full]      | 5276  | No  | NA   | 0  | 0              | Low-quality     | Genome-fragment | NA   | 17.86 | 0     |
| S11_vx_k141_39184         | [full]      | 5278  | No  | NA   | 2  | 0              | Low-quality     | Genome-fragment | NA   | 7.97  | 0     |
| S2_extracted_k141_20395   |             | 3155  | No  | NA   | 0  | 1              | Not-determined  | Genome-fragment | NA   | 0     | 0     |
| S2_extracted_k141_20398   |             | 1223  | No  | NA   | 0  | 1              | Not-determined  | Genome-fragment | NA   | 0     | 0     |
| S2_extracted_k141_17688   |             | 1034  | No  | NA   | 0  | 2              | Not-determined  | Genome-fragment | NA   | 0     | 0     |
| S2_extracted_k141_5478    |             | 1297  | No  | NA   | 0  | 1              | Not-determined  | Genome-fragment | NA   | 0     | 0     |
| S5_vx_k141_102560         | [full]      | 5281  | No  | NA   | 2  | 0              | Low-quality     | Genome-fragment | NA   | 3.56  | 0     |
| S2_extracted_k141_150891  |             | 1801  | No  | NA   | 0  | 1              | Not-determined  | Genome-fragment | NA   | 0     | 0     |
| S2_extracted_k141_2836    |             | 1005  | No  | NA   | 0  | 1              | Not-determined  | Genome-fragment | NA   | 0     | 0     |
| S3_extracted_k141_98239   |             | 5283  | No  | NA   | 0  | 0              | Low-quality     | Genome-fragment | NA   | 8.95  | 0     |
| S2_extracted_k141_6878    |             | 1536  | No  | NA   | 0  | 0              | Not-determined  | Genome-fragment | NA   | 0     | 0     |
| S2_extracted_k141_4130    |             | 10094 | No  | NA   | 17 | 1              | High-quality    | Genome-fragment | NA   | 100   | 0     |
| S11_extracted_k141_25071  |             | 5286  | No  | NA   | 4  | 0              | Low-quality     | Genome-fragment | NA   | 8.18  | 0     |
| S5_vx_k141_126677         | [full]      | 5286  | No  | NA   | 0  | 0              | Low-quality     | Genome-fragment | NA   | 8.42  | 0     |
| S2_extracted_k141_19073   |             | 1351  | No  | NA   | 0  | 2              | Not-determined  | Genome-fragment | NA   | 0     | 0     |
| S2_extracted_k141_15028   |             | 1221  | No  | NA   | 0  | 0              | Not-determined  | Genome-fragment | NA   | 0     | 0     |
| S2_extracted_k141_16360   |             | 1620  | No  | NA   | 0  | 2              | Low-quality     | Genome-fragment | NA   | 0     | 0     |
| S5_vx_k141_6720           | [full]      | 5292  | No  | NA   | 0  | 2              | Low-quality     | Genome-fragment | NA   | 0.52  | 0     |
| S2_extracted_k141_163     |             | 1066  | No  | NA   | 0  | 0              | Not-determined  | Genome-fragment | NA   | 0     | 0     |
| S2_extracted_k141_1403    |             | 1277  | No  | NA   | 0  | 1              | Not-determined  | Genome-fragment | NA   | 0     | 0     |
| S2_extracted_k141_19089   |             | 1177  | No  | NA   | 0  | 1              | Not-determined  | Genome-fragment | NA   | 0     | 0     |
| S2_extracted_k141_19102   |             | 1357  | No  | NA   | 0  | 0              | Not-determined  | Genome-fragment | NA   | 0     | 0     |
| S2_extracted_k141_20497   |             | 1266  | No  | NA   | 0  | 1              | Not-determined  | Genome-fragment | NA   | 0     | 0     |
| S2_extracted_k141_11720   |             | 1411  | No  | NA   | 0  | 0              | Not-determined  | Genome-fragment | NA   | 0     | 0     |
| S10_extracted_60225       |             | 5294  | No  | NA   | 0  | 2              | Low-quality     | Genome-fragment | NA   | 2.4   | 0     |
| S2_extracted_k141_16420   |             | 1051  | No  | NA   | 0  | 0              | Not-determined  | Genome-fragment | NA   | 0     | 0     |
| S2_extracted_k141_6950    |             | 1188  | No  | NA   | 0  | 1              | Not-determined  | Genome-fragment | NA   | 0     | 0     |
| S2_extracted_k141_13790   |             | 1008  | No  | NA   | 0  | 0              | Not-determined  | Genome-fragment | NA   | 0     | 0     |
| S2_extracted_k141_9683    |             | 1203  | No  | NA   | 0  | 1              | Not-determined  | Genome-fragment | NA   | 0     | 0     |
| S8_vx_k141_7051           | [full]      | 5295  | No  | NA   | 0  | 2              | Low-quality     | Genome-fragment | NA   | 2.69  | 0     |
| S2_extracted_k141_5623    |             | 1316  | No  | NA   | 0  | 1              | Not-determined  | Genome-fragment | NA   | 0     | 0     |
| S2_extracted_k141_12373   |             | 2105  | No  | NA   | 0  | 0              | Not-determined  | Genome-fragment | NA   | 0     | 0     |
| S2_extracted_k141_9726    |             | 4231  | No  | NA   | 0  | 3              | Not-determined  | Genome-fragment | NA   | 0     | 0     |
| S2_extracted_k141_15203   |             | 7125  | No  | NA   | 0  | 0              | Not-determined  | Genome-fragment | NA   | 0     | 0     |
| S2_extracted_k141_32717   |             | 5297  | No  | NA   | 3  | 0              | Low-quality     | Genome-fragment | NA   | 12.96 | 0     |
| S7_extracted_28907        |             | 5297  | No  | NA   | 0  | 0              | Low-quality     | Genome-fragment | NA   | 6.14  | 0     |
| S2_extracted_k141_9748    |             | 1006  | No  | NA   | 1  | 1              | Not-determined  | Genome-fragment | NA   | 0     | 0     |
| S17_vx_k141_68732         | [full]      | 5298  | No  | NA   | 3  | 0              | Low-quality     | Genome-fragment | NA   | 8.73  | 0     |
| S2_extracted_k141_9754    |             | 1678  | No  | NA   | 0  | 1              | Not-determined  | Genome-fragment | NA   | 0     | 0     |
| S2_extracted_k141_17850   |             | 15371 | No  | NA   | 0  | 0              | Medium-quality  | Genome-fragment | NA   | 65.08 | 0     |
| S2_extracted_k141_230     |             | 1272  | No  | NA   | 0  | 1              | Not-determined  | Genome-fragment | NA   | 0     | 0     |
| S2_extracted_k141_11116   |             | 1250  | No  | NA   | 0  | 2              | Not-determined  | Genome-fragment | NA   | 0     | 0     |
| S2_extracted_k141_12457   |             | 1408  | No  | NA   | 0  | 2              | Not-determined  | Genome-fragment | NA   | 0     | 0     |
| S13_vx_57227              | [full]      | 5298  | No  | NA   | 0  | 1              | Low-quality     | Genome-fragment | NA   | 8.07  | 0     |
| S2_extracted_k141_9797    |             | 1037  | No  | NA   | 0  | 0              | Not-determined  | Genome-fragment | NA   | 0     | 0     |
| S2_extracted_k141_16616   |             | 3886  | No  | NA   | 0  | 2              | Not-determined  | Genome-fragment | NA   | 0     | 0     |
| S2_extracted_k141_7132    |             | 3914  | No  | NA   | 0  | 1              | Not-determined  | Genome-fragment | NA   | 0     | 0     |
| S2_extracted_k141_9830    |             | 4453  | No  | NA   | 0  | 2              | Not-determined  | Genome-fragment | NA   | 0     | 0     |
| S2_extracted_k141_7167    |             | 1345  | No  | NA   | 0  | 0              | Not-determined  | Genome-fragment | NA   | 0     | 0     |
| S2_extracted_k141_11195   |             | 1808  | No  | NA   | 0  | 1              | Not-determined  | Genome-fragment | NA   | 0     | 0     |
| S16_vx_36599              | [full]      | 5298  | No  | NA   | 0  | 1              | Low-quality     | Genome-fragment | NA   | 2.67  | 0     |
| S2_extracted_k141_9847    |             | 1661  | No  | NA   | 0  | 2              |                 |                 |      |       |       |



|                           |       |     |    |    |   |                |                 |    |       |
|---------------------------|-------|-----|----|----|---|----------------|-----------------|----|-------|
| 52_extracted_k141_8647    | 1351  | No  | NA | 0  | 1 | Not-determined | Genome-fragment | NA | 0     |
| 52_extracted_k141_8650    | 1402  | No  | NA | 0  | 1 | Not-determined | Genome-fragment | NA | 0     |
| 52_extracted_k141_18295   | 1297  | No  | NA | 0  | 2 | Not-determined | Genome-fragment | NA | 0     |
| 51_vs_k141_10865[full]    | 5315  | No  | NA | 1  | 0 | Low-quality    | Genome-fragment | NA | 11.69 |
| 52_extracted_k141_5970    | 2793  | No  | NA | 0  | 1 | Not-determined | Genome-fragment | NA | 0     |
| 52_extracted_k141_8660    | 1320  | No  | NA | 0  | 1 | Not-determined | Genome-fragment | NA | 0     |
| 512_extracted_k141_168017 | 5316  | No  | NA | 1  | 0 | Low-quality    | Genome-fragment | NA | 8.48  |
| 52_extracted_k141_3305    | 1139  | No  | NA | 0  | 0 | Not-determined | Genome-fragment | NA | 0     |
| 52_extracted_k141_18310   | 7448  | No  | NA | 0  | 1 | Not-determined | Genome-fragment | NA | 0     |
| 52_extracted_k141_16940   | 1081  | No  | NA | 0  | 0 | Not-determined | Genome-fragment | NA | 0     |
| 52_extracted_k141_4739    | 1065  | No  | NA | 0  | 1 | Not-determined | Genome-fragment | NA | 0     |
| 51_vs_k141_145174[full]   | 5317  | No  | NA | 0  | 0 | Low-quality    | Genome-fragment | NA | 12.98 |
| 52_extracted_k141_8703    | 2136  | No  | NA | 0  | 1 | Not-determined | Genome-fragment | NA | 0     |
| 52_extracted_k141_7420    | 3066  | No  | NA | 0  | 2 | Not-determined | Genome-fragment | NA | 0     |
| 517_vs_k141_135583[full]  | 5318  | No  | NA | 0  | 2 | Low-quality    | Genome-fragment | NA | 6.52  |
| 52_extracted_k141_20811   | 1039  | No  | NA | 0  | 1 | Not-determined | Genome-fragment | NA | 0     |
| 52_extracted_k141_20815   | 1078  | No  | NA | 0  | 0 | Not-determined | Genome-fragment | NA | 0     |
| 59_vs_k141_7379[full]     | 5318  | No  | NA | 2  | 0 | Low-quality    | Genome-fragment | NA | 12.68 |
| 52_extracted_k141_15747   | 1154  | No  | NA | 0  | 0 | Not-determined | Genome-fragment | NA | 0     |
| 52_extracted_k141_19752   | 1149  | No  | NA | 0  | 2 | Not-determined | Genome-fragment | NA | 0     |
| 52_extracted_k141_8758    | 1374  | No  | NA | 0  | 2 | Not-determined | Genome-fragment | NA | 0     |
| 52_extracted_k141_4799    | 5667  | No  | NA | 0  | 3 | Not-determined | Genome-fragment | NA | 0     |
| 52_extracted_k141_3356    | 13599 | No  | NA | 3  | 0 | Complete       | High-quality    | NA | 100   |
| 52_extracted_k141_18390   | 2095  | No  | NA | 0  | 1 | Not-determined | Genome-fragment | NA | 0     |
| 52_extracted_k141_14311   | 1103  | No  | NA | 0  | 2 | Not-determined | Genome-fragment | NA | 0     |
| 56_vs_k141_18389[full]    | 5318  | No  | NA | 1  | 0 | Low-quality    | Genome-fragment | NA | 14.42 |
| 517_vs_k141_8430[full]    | 5319  | No  | NA | 9  | 0 | Low-quality    | Genome-fragment | NA | 15.98 |
| 52_extracted_k141_14323   | 1110  | No  | NA | 0  | 2 | Not-determined | Genome-fragment | NA | 0     |
| 52_extracted_k141_8937    | 1549  | No  | NA | 0  | 1 | Not-determined | Genome-fragment | NA | 0     |
| 516_extracted_12345       | 5320  | No  | NA | 0  | 4 | Low-quality    | Genome-fragment | NA | 0.46  |
| 512_vs_k141_181158[full]  | 5320  | No  | NA | 0  | 1 | Low-quality    | Genome-fragment | NA | 2.47  |
| 57_vs_70225[full]         | 5321  | No  | NA | 0  | 0 | Low-quality    | Genome-fragment | NA | 12.92 |
| 516_extracted_91874       | 5321  | No  | NA | 0  | 2 | Low-quality    | Genome-fragment | NA | 1.43  |
| 52_extracted_k141_6194    | 1368  | No  | NA | 0  | 0 | Not-determined | Genome-fragment | NA | 0     |
| 512_extracted_k141_118289 | 5324  | No  | NA | 0  | 1 | Low-quality    | Genome-fragment | NA | 5.96  |
| 52_extracted_k141_18478   | 1038  | No  | NA | 0  | 0 | Not-determined | Genome-fragment | NA | 0     |
| 52_extracted_k141_20910   | 15926 | No  | NA | 7  | 0 | Medium-quality | Genome-fragment | NA | 52.63 |
| 51_vs_k141_101263[full]   | 5325  | No  | NA | 0  | 3 | Low-quality    | Genome-fragment | NA | 4.16  |
| 52_extracted_k141_20917   | 1255  | No  | NA | 0  | 1 | Not-determined | Genome-fragment | NA | 0     |
| 52_extracted_k141_20919   | 1279  | No  | NA | 0  | 0 | Not-determined | Genome-fragment | NA | 0     |
| 52_extracted_k141_17072   | 1529  | No  | NA | 0  | 1 | Not-determined | Genome-fragment | NA | 0     |
| 52_extracted_k141_20929   | 1365  | No  | NA | 0  | 1 | Not-determined | Genome-fragment | NA | 0     |
| 52_extracted_k141_14377   | 13044 | No  | NA | 0  | 8 | Not-determined | Genome-fragment | NA | 0     |
| 52_extracted_k141_8938    | 1387  | No  | NA | 0  | 1 | Not-determined | Genome-fragment | NA | 0     |
| 55_vs_k141_2701[full]     | 5325  | No  | NA | 4  | 0 | Low-quality    | Genome-fragment | NA | 8.87  |
| 55_vs_k141_86201[full]    | 5326  | No  | NA | 0  | 0 | Low-quality    | Genome-fragment | NA | 3.43  |
| 52_extracted_k141_680     | 1223  | No  | NA | 0  | 1 | Not-determined | Genome-fragment | NA | 0     |
| 52_extracted_k141_17117   | 1164  | No  | NA | 0  | 1 | Not-determined | Genome-fragment | NA | 0     |
| 52_extracted_k141_15893   | 1053  | No  | NA | 0  | 1 | Not-determined | Genome-fragment | NA | 0     |
| 52_extracted_k141_4910    | 17143 | No  | NA | 8  | 0 | Medium-quality | Genome-fragment | NA | 80.99 |
| 516_extracted_47809       | 5326  | No  | NA | 1  | 0 | Low-quality    | Genome-fragment | NA | 3.51  |
| 52_extracted_k141_699     | 1227  | No  | NA | 1  | 1 | Not-determined | Genome-fragment | NA | 0     |
| 52_extracted_k141_702     | 1030  | No  | NA | 0  | 1 | Not-determined | Genome-fragment | NA | 0     |
| 512_vs_k141_178087[full]  | 5328  | No  | NA | 0  | 3 | Low-quality    | Genome-fragment | NA | 3.54  |
| 52_extracted_k141_21018   | 1818  | No  | NA | 0  | 1 | Not-determined | Genome-fragment | NA | 0     |
| 52_extracted_k141_4993    | 1323  | No  | NA | 0  | 0 | Not-determined | Genome-fragment | NA | 0     |
| 510_vs_63587[full]        | 5330  | No  | NA | 1  | 0 | Low-quality    | Genome-fragment | NA | 2.98  |
| 52_extracted_k141_3529    | 1519  | No  | NA | 0  | 1 | Not-determined | Genome-fragment | NA | 0     |
| 59_extracted_k141_11373   | 5332  | No  | NA | 0  | 0 | Low-quality    | Genome-fragment | NA | 11.29 |
| 52_extracted_k141_3549    | 1128  | No  | NA | 0  | 2 | Not-determined | Genome-fragment | NA | 0     |
| 515_extracted_11450       | 5332  | No  | NA | 0  | 0 | Low-quality    | Genome-fragment | NA | 2.83  |
| 52_extracted_k141_791     | 1207  | No  | NA | 0  | 1 | Not-determined | Genome-fragment | NA | 0     |
| 52_extracted_k141_9043    | 1053  | No  | NA | 0  | 1 | Not-determined | Genome-fragment | NA | 0     |
| 52_extracted_k141_14509   | 5819  | No  | NA | 0  | 2 | Not-determined | Genome-fragment | NA | 0     |
| 52_extracted_k141_20000   | 1318  | No  | NA | 0  | 1 | Not-determined | Genome-fragment | NA | 0     |
| 511_vs_k141_60165[full]   | 5335  | No  | NA | 1  | 0 | Low-quality    | Genome-fragment | NA | 12.74 |
| 51_vs_k141_88317[full]    | 5335  | No  | NA | 2  | 0 | Low-quality    | Genome-fragment | NA | 8.97  |
| 57_vs_34023[full]         | 5335  | No  | NA | 0  | 2 | Low-quality    | Genome-fragment | NA | 2.93  |
| 516_extracted_89087       | 1386  | No  | NA | 0  | 0 | Low-quality    | Genome-fragment | NA | 2.14  |
| 55_extracted_k141_85848   | 5337  | No  | NA | 2  | 0 | Low-quality    | Genome-fragment | NA | 12.41 |
| 52_extracted_k141_869     | 1049  | No  | NA | 0  | 0 | Not-determined | Genome-fragment | NA | 0     |
| 516_extracted_71601       | 5337  | No  | NA | 0  | 0 | Low-quality    | Genome-fragment | NA | 6.96  |
| 52_extracted_k141_20040   | 2627  | No  | NA | 0  | 0 | Not-determined | Genome-fragment | NA | 0     |
| 52_extracted_k141_17740   | 1912  | No  | NA | 0  | 1 | Not-determined | Genome-fragment | NA | 0     |
| 52_extracted_k141_897     | 1185  | No  | NA | 0  | 1 | Not-determined | Genome-fragment | NA | 0     |
| 52_extracted_k141_21122   | 7141  | No  | NA | 0  | 0 | Not-determined | Genome-fragment | NA | 0     |
| 58_vs_k141_26692[full]    | 5337  | No  | NA | 0  | 1 | Low-quality    | Genome-fragment | NA | 2.69  |
| 516_extracted_106925      | 5338  | No  | NA | 0  | 2 | Low-quality    | Genome-fragment | NA | 4.82  |
| 512_vs_k141_89685[full]   | 5338  | No  | NA | 0  | 0 | Low-quality    | Genome-fragment | NA | 6.26  |
| 52_extracted_k141_3700    | 1604  | No  | NA | 0  | 1 | Not-determined | Genome-fragment | NA | 0     |
| 52_extracted_k141_3701    | 1003  | No  | NA | 0  | 0 | Not-determined | Genome-fragment | NA | 0     |
| 52_extracted_k141_21160   | 1027  | No  | NA | 0  | 0 | Not-determined | Genome-fragment | NA | 0     |
| 52_extracted_k141_938     | 3907  | No  | NA | 0  | 4 | Not-determined | Genome-fragment | NA | 0     |
| 52_extracted_k141_21184   | 1268  | No  | NA | 0  | 1 | Not-determined | Genome-fragment | NA | 0     |
| 514_extracted_k141_76582  | 5339  | No  | NA | 0  | 0 | Low-quality    | Genome-fragment | NA | 8.12  |
| 52_extracted_k141_955     | 1171  | No  | NA | 0  | 1 | Not-determined | Genome-fragment | NA | 0     |
| 52_extracted_k141_3780    | 1257  | No  | NA | 0  | 2 | Not-determined | Genome-fragment | NA | 0     |
| 52_extracted_k141_2218    | 1180  | No  | NA | 0  | 0 | Not-determined | Genome-fragment | NA | 0     |
| 53_vs_k141_57834[full]    | 5339  | No  | NA | 0  | 0 | Low-quality    | Genome-fragment | NA | 13.26 |
| 52_extracted_k141_2252    | 2564  | No  | NA | 0  | 2 | Not-determined | Genome-fragment | NA | 0     |
| 52_extracted_k141_2254    | 2452  | No  | NA | 0  | 0 | Not-determined | Genome-fragment | NA | 0     |
| 52_extracted_k141_2263    | 1186  | No  | NA | 0  | 1 | Not-determined | Genome-fragment | NA | 0     |
| 57_vs_27741[full]         | 5342  | No  | NA | 1  | 0 | Low-quality    | Genome-fragment | NA | 8.59  |
| 52_extracted_k141_5142    | 1150  | No  | NA | 0  | 1 | Not-determined | Genome-fragment | NA | 0     |
| 52_extracted_k141_17346   | 1272  | No  | NA | 0  | 0 | Not-determined | Genome-fragment | NA | 0     |
| 52_extracted_k141_16112   | 1584  | No  | NA | 0  | 0 | Not-determined | Genome-fragment | NA | 0     |
| 52_extracted_k141_10330   | 2830  | No  | NA | 0  | 2 | Not-determined | Genome-fragment | NA | 0     |
| 52_extracted_k141_20256   | 1164  | No  | NA | 0  | 1 | Not-determined | Genome-fragment | NA | 0     |
| 52_extracted_k141_14693   | 1012  | No  | NA | 0  | 0 | Not-determined | Genome-fragment | NA | 0     |
| 515_vs_31929[full]        | 5343  | No  | NA | 0  | 2 | Low-quality    | Genome-fragment | NA | 2.44  |
| 52_extracted_k141_64623   | 5345  | No  | NA | 2  | 0 | Low-quality    | Genome-fragment | NA | 24.25 |
| 52_extracted_k141_61500   | 2029  | No  | NA | 0  | 1 | Not-determined | Genome-fragment | NA | 0     |
| 510_vs_17561[full]        | 5347  | No  | NA | 1  | 0 | Low-quality    | Genome-fragment | NA | 13.28 |
| 52_extracted_k141_9392    | 1344  | No  | NA | 0  | 1 | Not-determined | Genome-fragment | NA | 0     |
| 59_vs_k141_74008[full]    | 5352  | No  | NA | 1  | 0 | Low-quality    | Genome-fragment | NA | 9.61  |
| 52_extracted_k141_2305    | 1331  | No  | NA | 0  | 2 | Not-determined | Genome-fragment | NA | 0     |
| 52_extracted_k141_12106   | 1742  | No  | NA | 0  | 2 | Not-determined | Genome-fragment | NA | 0     |
| 52_extracted_k141_5235    | 1968  | No  | NA | 0  | 2 | Not-determined | Genome-fragment | NA | 0     |
| 52_extracted_k141_6413    | 1107  | No  | NA | 0  | 1 | Not-determined | Genome-fragment | NA | 0     |
| 511_vs_k141_34204[full]   | 5354  | No  | NA | 0  | 1 | Low-quality    | Genome-fragment | NA | 4.5   |
| 52_extracted_k141_17420   | 1476  | No  | NA | 0  | 1 | Not-determined | Genome-fragment | NA | 0     |
| 52_extracted_k141_18900   | 4044  | No  | NA | 0  | 1 | Not-determined | Genome-fragment | NA | 0     |
| 52_extracted_k141_14808   | 1505  | No  | NA | 0  | 1 | Not-determined | Genome-fragment | NA | 0     |
| 512_extracted_k141_17662  | 5354  | No  | NA | 5  | 0 | Low-quality    | Genome-fragment | NA | 15.16 |
| 52_extracted_k141_1151    | 1352  | No  | NA | 0  | 0 | Not-determined | Genome-fragment | NA | 0     |
| 59_extracted_k141_71054   | 5356  | No  | NA | 1  | 0 | Low-quality    | Genome-fragment | NA | 3.26  |
| 52_extracted_k141_3915    | 1175  | No  | NA | 0  | 0 | Not-determined | Genome-fragment | NA | 0     |
| 510_extracted_25972       | 5356  | No  | NA | 6  | 0 | Low-quality    | Genome-fragment | NA | 8.9   |
| 52_extracted_k141_1212    | 1049  | No  | NA | 0  | 1 | Not-determined | Genome-fragment | NA | 0     |
| 52_extracted_k141_1213    | 1192  | No  | NA | 0  | 1 | Not-determined | Genome-fragment | NA | 0     |
| 52_extracted_k141_1215    | 1461  | No  | NA | 0  | 0 | Not-determined | Genome-fragment | NA | 0     |
| 52_extracted_k141_1217    | 1540  | No  | NA | 0  | 1 | Not-determined | Genome-fragment | NA | 0     |
| 52_extracted_k141_12126   | 1287  | No  | NA | 0  | 0 | Not-determined | Genome-fragment | NA | 0     |
| 57_vs_18067[full]         | 5357  | Yes | NA | 1  | 3 | Low-quality    | Genome-fragment | NA | 2.53  |
| 57_vs_51357[full]         | 5358  | No  | NA | 1  | 0 | Low-quality    | Genome-fragment | NA | 6.01  |
| 516_vs_42144[full]        | 5358  | No  | NA | 3  | 0 | Low-quality    | Genome-fragment | NA | 3.17  |
| 52_extracted_k141_4043    | 1301  | No  | NA | 0  | 1 | Not-determined | Genome-fragment | NA | 0     |
| 51_extracted_k141_29636   | 5360  | No  | NA | 0  | 1 | Not-determined | Genome-fragment | NA | 13.66 |
| 52_extracted_k141_17583   | 2777  | No  | NA | 0  | 3 | Not-determined | Genome-fragment | NA | 0     |
| 58_vs_k141_47315[full]    | 5360  | No  | NA | 0  | 0 | Low-quality    | Genome-fragment | NA | 10.12 |
| 52_extracted_k141_11352   | 1235  | No  | NA | 0  | 0 | Not-determined | Genome-fragment | NA | 0     |
| 52_extracted_k141_21511   | 64083 | No  | NA | 28 | 0 | High-quality   | High-quality    | NA | 97.85 |
| 53_extracted_k141_13245   | 5364  | No  | NA | 0  | 2 | Low-quality    | Genome-fragment | NA | 2.67  |
| 52_extracted_k141_8072    | 1297  | No  | NA | 0  | 2 | Not-determined | Genome-fragment | NA | 9.83  |
| 52_extracted_k141_11781   | 5366  | No  | NA | 1  | 1 | Low-quality    | Genome-fragment | NA | 1.22  |
| 57_vs_31553[full]         | 5367  | Yes | NA | 1  | 3 | Low-quality    | Genome-fragment | NA | 77.98 |
| 57_vs_74327[full]         | 5368  | No  | NA | 0  | 0 | Low-quality    | Genome-fragment | NA | 10.82 |
| 52_extracted_k141_10584   | 1139  | No  | NA | 0  | 1 | Not-determined | Genome-fragment | NA | 0     |
| 52_extracted_k141_6673    | 1833  | No  | NA | 0  | 2 | Not-determined | Genome-fragment | NA | 0     |
| 516_extracted_43067       | 5368  | No  | NA | 2  | 0 | Low-quality    | Genome-fragment | NA | 12.9  |
| 52_extracted_k141_10750   | 1229  | No  | NA | 0  | 0 | Not-determined | Genome-fragment | NA | 0     |
| 52_extracted_k141_21630   | 48927 | No  | NA | 24 | 1 | Complete       | High-quality    | NA | 100   |
| 52_vs_k141_7306[full]     | 46830 | No  | NA | 15 | 1 | High-quality   | High-quality    | NA | 100   |
| 52_vs_k141_10280[full]    | 2749  | No  | NA | 0  | 0 | Not-determined | Genome-fragment | NA | 0     |
| 52_vs_k141_21629[full]    | 2859  | No  | NA | 0  | 0 | Not-d          |                 |    |       |



|                           |          |       |      |    |       |   |                |                 |                 |       |       |
|---------------------------|----------|-------|------|----|-------|---|----------------|-----------------|-----------------|-------|-------|
| 512_vs_k141_96093         | [full]   | 5401  | No   | NA | 0     | 2 | Low-quality    | Genome-fragment | 3.72            | 0     |       |
| 52_vs_k141_3343           | [full]   | 2155  | No   | NA | 1     | 1 | Not-determined | Genome-fragment | NA              | 0     |       |
| 52_vs_k141_3815           | [full]   | 1124  | No   | NA | 0     | 0 | Not-determined | Genome-fragment | NA              | 0     |       |
| 58_extracted_k141_144561  |          | 5402  | Yes  |    | 1186  | 1 | 3              | Low-quality     | Genome-fragment | 1.54  | 78.05 |
| 52_vs_k141_4368           | [full]   | 20983 | No   | NA | 8     | 0 | Medium-quality | Genome-fragment | 69.27           | 0     |       |
| 57_extracted_33039        |          | 5408  | No   | NA | 0     | 1 | Low-quality    | Genome-fragment | 9.03            | 0     |       |
| 512_vs_k141_34975         | [full]   | 5410  | No   | NA | 1     | 0 | Low-quality    | Genome-fragment | 9.72            | 0     |       |
| 57_vs_35941               | [full]   | 5411  | No   | NA | 2     | 0 | Low-quality    | Genome-fragment | 12.69           | 0     |       |
| 55_extracted_k141_29860   |          | 5413  | No   | NA | 2     | 0 | Low-quality    | Genome-fragment | 3.29            | 0     |       |
| 516_vs_36527              | [full]   | 5413  | No   | NA | 9     | 0 | Low-quality    | Genome-fragment | 15.73           | 0     |       |
| 516_vs_129215             | [full]   | 5415  | No   | NA | 0     | 4 | Low-quality    | Genome-fragment | 2.15            | 0     |       |
| 59_vs_k141_17471          | [full]   | 5418  | No   | NA | 1     | 0 | Low-quality    | Genome-fragment | 12.94           | 0     |       |
| 52_vs_k141_7225           | [full]   | 1206  | No   | NA | 0     | 2 | Not-determined | Genome-fragment | NA              | 0     |       |
| 57_vs_71327               | [full]   | 5419  | No   | NA | 1     | 0 | Low-quality    | Genome-fragment | 16.31           | 0     |       |
| 52_vs_k141_15413          | [full]   | 2915  | No   | NA | 0     | 0 | Not-determined | Genome-fragment | NA              | 0     |       |
| 52_vs_k141_14049          | [full]   | 3250  | No   | NA | 1     | 3 | Not-determined | Genome-fragment | NA              | 0     |       |
| 514_extracted_k141_69617  |          | 5421  | No   | NA | 0     | 4 | Low-quality    | Genome-fragment | 3.22            | 0     |       |
| 516_extracted_67634       |          | 5421  | No   | NA | 3     | 0 | Low-quality    | Genome-fragment | 9.02            | 0     |       |
| 52_vs_k141_6528           | [full]   | 6857  | No   | NA | 0     | 4 | Not-determined | Genome-fragment | NA              | 0     |       |
| 514_extracted_k141_83755  |          | 5425  | No   | NA | 2     | 0 | Low-quality    | Genome-fragment | 12.01           | 0     |       |
| 53_extracted_k141_32609   |          | 5425  | No   | NA | 0     | 1 | Low-quality    | Genome-fragment | 9.93            | 0     |       |
| 57_vs_9256                | [full]   | 5426  | No   | NA | 0     | 0 | Low-quality    | Genome-fragment | 13.95           | 0     |       |
| 512_vs_k141_105854        | [full]   | 5426  | No   | NA | 0     | 3 | Low-quality    | Genome-fragment | 3.84            | 0     |       |
| 59_vs_k141_41408          | [full]   | 5429  | No   | NA | 3     | 0 | Low-quality    | Genome-fragment | 14.1            | 0     |       |
| 511_vs_k141_7346          | [full]   | 5430  | No   | NA | 2     | 1 | Low-quality    | Genome-fragment | 8.45            | 0     |       |
| 511_vs_k141_30408         | [full]   | 5430  | No   | NA | 1     | 0 | Low-quality    | Genome-fragment | 3.33            | 0     |       |
| 52_vs_k141_18201          | [full]   | 1880  | No   | NA | 0     | 3 | Not-determined | Genome-fragment | NA              | 0     |       |
| 55_extracted_k141_115658  |          | 5430  | No   | NA | 5     | 0 | Low-quality    | Genome-fragment | 17.9            | 0     |       |
| 55_vs_k141_51175          | [full]   | 5430  | No   | NA | 1     | 0 | Low-quality    | Genome-fragment | 13.04           | 0     |       |
| 55_vs_k141_143893         | [full]   | 5430  | Yes  |    | 3844  | 1 | 1              | Low-quality     | Genome-fragment | 9.75  | 29.21 |
| 52_vs_k141_18252          | [full]   | 4668  | No   | NA | 0     | 1 | Not-determined | Genome-fragment | NA              | 0     |       |
| 52_vs_k141_17375          | [full]   | 2183  | No   | NA | 0     | 1 | Not-determined | Genome-fragment | NA              | 0     |       |
| 53_extracted_k141_57934   |          | 5431  | No   | NA | 1     | 0 | Low-quality    | Genome-fragment | 4.06            | 0     |       |
| 52_vs_k141_11462          | [full]   | 2096  | No   | NA | 0     | 0 | Not-determined | Genome-fragment | NA              | 0     |       |
| 58_vs_k141_12184          | [full]   | 5433  | No   | NA | 0     | 1 | Low-quality    | Genome-fragment | 10.35           | 0     |       |
| 53_vs_k141_6404           | [full]   | 5435  | No   | NA | 2     | 0 | Low-quality    | Genome-fragment | 4.24            | 0     |       |
| 58_vs_k141_140415         | [full]   | 5435  | No   | NA | 0     | 4 | Low-quality    | Genome-fragment | 2.81            | 0     |       |
| 517_extracted_k141_7897   |          | 5436  | No   | NA | 5     | 0 | Low-quality    | Genome-fragment | 6.92            | 0     |       |
| 54_vs_VtkSnrn_2993_cat_2  |          | 5436  | No   | NA | 0     | 0 | Low-quality    | Genome-fragment | 11.91           | 0     |       |
| 58_extracted_k141_23657   |          | 5436  | No   | NA | 4     | 0 | Low-quality    | Genome-fragment | 12.16           | 0     |       |
| 52_vs_k141_14285          | [full]   | 1492  | No   | NA | 0     | 1 | Not-determined | Genome-fragment | NA              | 0     |       |
| 53_extracted_k141_89210   |          | 5438  | No   | NA | 0     | 0 | Low-quality    | Genome-fragment | 17.95           | 0     |       |
| 52_vs_k141_8783           | [full]   | 1703  | No   | NA | 0     | 2 | Not-determined | Genome-fragment | NA              | 0     |       |
| 512_vs_k141_167667        | [full]   | 5438  | No   | NA | 2     | 1 | Low-quality    | Genome-fragment | 4.22            | 0     |       |
| 58_extracted_k141_143330  |          | 5440  | No   | NA | 0     | 0 | Low-quality    | Genome-fragment | 6.55            | 0     |       |
| 513_vs_41376              | [full]   | 5441  | No   | NA | 0     | 0 | Low-quality    | Genome-fragment | 10.32           | 0     |       |
| 512_extracted_k141_176017 |          | 5441  | No   | NA | 1     | 0 | Low-quality    | Genome-fragment | 11.21           | 0     |       |
| 55_vs_k141_41734          | [full]   | 5443  | No   | NA | 0     | 2 | Low-quality    | Genome-fragment | 5.2             | 0     |       |
| 52_vs_k141_14331          | [full]   | 8629  | No   | NA | 0     | 2 | Not-determined | Genome-fragment | NA              | 0     |       |
| 516_extracted_69016       |          | 5444  | No   | NA | 3     | 0 | Low-quality    | Genome-fragment | 10.7            | 0     |       |
| 53_extracted_k141_111357  |          | 5445  | No   | NA | 0     | 0 | Low-quality    | Genome-fragment | 37.88           | 0     |       |
| 52_vs_k141_8880           | [full]   | 2138  | No   | NA | 0     | 0 | Not-determined | Genome-fragment | NA              | 0     |       |
| 52_vs_k141_4847           | [full]   | 1988  | No   | NA | 0     | 1 | Not-determined | Genome-fragment | NA              | 0     |       |
| 514_extracted_k141_22336  |          | 5446  | No   | NA | 1     | 0 | Low-quality    | Genome-fragment | 3.83            | 0     |       |
| 514_vs_k141_15215         | [full]   | 5447  | No   | NA | 0     | 0 | Low-quality    | Genome-fragment | 13.85           | 0     |       |
| 511_vs_k141_20987         | [full]   | 5448  | No   | NA | 2     | 0 | Low-quality    | Genome-fragment | 13.55           | 0     |       |
| 52_vs_k141_17146          | [full]   | 2320  | No   | NA | 0     | 1 | Not-determined | Genome-fragment | NA              | 0     |       |
| 52_vs_k141_11747          | [full]   | 1458  | No   | NA | 0     | 0 | Not-determined | Genome-fragment | NA              | 0     |       |
| 53_extracted_k141_27138   |          | 5449  | No   | NA | 0     | 0 | Low-quality    | Genome-fragment | 9.5             | 0     |       |
| 52_vs_k141_7551           | [full]   | 1063  | No   | NA | 0     | 1 | Not-determined | Genome-fragment | NA              | 0     |       |
| 52_vs_k141_10256          | [full]   | 1368  | No   | NA | 0     | 0 | Not-determined | Genome-fragment | NA              | 0     |       |
| 53_extracted_k141_14778   |          | 5450  | No   | NA | 0     | 0 | Low-quality    | Genome-fragment | 9.58            | 0     |       |
| 513_vs_100903             | [full]   | 5454  | No   | NA | 0     | 2 | Low-quality    | Genome-fragment | 2.68            | 0     |       |
| 516_vs_144384             | [full]   | 5455  | No   | NA | 0     | 2 | Low-quality    | Genome-fragment | 3.67            | 0     |       |
| 58_vs_k141_199127         | [full]   | 5456  | No   | NA | 2     | 0 | Low-quality    | Genome-fragment | 10.74           | 0     |       |
| 515_extracted_48444       |          | 5457  | No   | NA | 0     | 0 | Low-quality    | Genome-fragment | 5.49            | 0     |       |
| 55_vs_k141_135677         | [full]   | 5461  | No   | NA | 3     | 0 | Low-quality    | Genome-fragment | 4.91            | 0     |       |
| 52_vs_k141_17173          | [full]   | 2658  | No   | NA | 0     | 1 | Not-determined | Genome-fragment | NA              | 0     |       |
| 57_vs_27501               | [full]   | 5463  | No   | NA | 0     | 1 | Low-quality    | Genome-fragment | 3.9             | 0     |       |
| 52_vs_k141_5003           | [full]   | 2745  | No   | NA | 0     | 2 | Not-determined | Genome-fragment | NA              | 0     |       |
| 58_vs_k141_186258         | [full]   | 5463  | No   | NA | 0     | 0 | Low-quality    | Genome-fragment | 12.96           | 0     |       |
| 57_vs_121942              | [full]   | 5464  | No   | NA | 0     | 0 | Low-quality    | Genome-fragment | 3.61            | 0     |       |
| 52_vs_k141_10289          | [full]   | 46594 | Yes  |    | 30604 | 6 | 8              | Medium-quality  | Genome-fragment | 56.92 | 34.32 |
| 53_extracted_k141_6126    |          | 5467  | No   | NA | 4     | 0 | Low-quality    | Genome-fragment | 24.93           | 0     |       |
| 52_vs_k141_16020          | [full]   | 6517  | No   | NA | 0     | 0 | Not-determined | Genome-fragment | NA              | 0     |       |
| 52_vs_k141_9210           | [full]   | 2417  | No   | NA | 0     | 2 | Not-determined | Genome-fragment | NA              | 0     |       |
| 52_vs_k141_10306          | [full]   | 12183 | No   | NA | 0     | 8 | Not-determined | Genome-fragment | NA              | 0     |       |
| 510_extracted_41714       |          | 5468  | No   | NA | 4     | 0 | Low-quality    | Genome-fragment | 13.11           | 0     |       |
| 52_vs_k141_5277           | [full]   | 2038  | No   | NA | 2     | 0 | Not-determined | Genome-fragment | NA              | 0     |       |
| 512_vs_k141_160949        | [full]   | 5468  | No   | NA | 2     | 0 | Low-quality    | Genome-fragment | 21.75           | 0     |       |
| 55_extracted_k141_121956  |          | 5473  | No   | NA | 3     | 0 | Low-quality    | Genome-fragment | 15.91           | 0     |       |
| 52_vs_k141_5911           | [full]   | 3017  | No   | NA | 0     | 2 | Not-determined | Genome-fragment | NA              | 0     |       |
| 58_extracted_k141_97923   |          | 5474  | No   | NA | 1     | 0 | Low-quality    | Genome-fragment | 8.46            | 0     |       |
| 58_vs_k141_68516          | [full]   | 5474  | No   | NA | 4     | 0 | Low-quality    | Genome-fragment | 12.95           | 0     |       |
| 52_vs_k141_17330          | [full]   | 3457  | No   | NA | 0     | 2 | Not-determined | Genome-fragment | NA              | 0     |       |
| 513_vs_112051             | [full]   | 5477  | No   | NA | 1     | 0 | Low-quality    | Genome-fragment | 41              | 0     |       |
| 54_extracted_26672        |          | 5477  | No   | NA | 0     | 0 | Low-quality    | Genome-fragment | 13.28           | 0     |       |
| 52_vs_k141_4203           | [full]   | 8083  | No   | NA | 0     | 5 | Not-determined | Genome-fragment | NA              | 0     |       |
| 52_vs_k141_5166           | [full]   | 1216  | No   | NA | 1     | 0 | Not-determined | Genome-fragment | NA              | 0     |       |
| 57_vs_26817               | [full]   | 5478  | No   | NA | 2     | 0 | Low-quality    | Genome-fragment | 7.07            | 0     |       |
| 51_vs_k141_70348          | [full]   | 5480  | No   | NA | 5     | 0 | Low-quality    | Genome-fragment | 17.05           | 0     |       |
| 52_vs_k141_3890           | [full]   | 7550  | No   | NA | 4     | 0 | Not-determined | Genome-fragment | NA              | 0     |       |
| 517_vs_k141_83354         | [full]   | 5481  | No   | NA | 1     | 0 | Low-quality    | Genome-fragment | 5.39            | 0     |       |
| 511_vs_k141_43875         | [full]   | 5483  | No   | NA | 4     | 0 | Low-quality    | Genome-fragment | 15.38           | 0     |       |
| 512_vs_k141_123192        | [full]   | 5483  | No   | NA | 7     | 0 | Low-quality    | Genome-fragment | 9.92            | 0     |       |
| 53_vs_k141_113523         | [full]   | 5484  | No   | NA | 1     | 0 | Low-quality    | Genome-fragment | 7.26            | 0     |       |
| 57_vs_45987               | [full]   | 5485  | No   | NA | 4     | 0 | Low-quality    | Genome-fragment | 11.99           | 0     |       |
| 52_vs_k141_6514           | [full]   | 1298  | No   | NA | 0     | 1 | Not-determined | Genome-fragment | NA              | 0     |       |
| 52_vs_k141_1207           | [full]   | 1082  | No   | NA | 0     | 0 | Not-determined | Genome-fragment | NA              | 0     |       |
| 511_vs_k141_89074         | [full]   | 5486  | No   | NA | 2     | 0 | Low-quality    | Genome-fragment | 6.79            | 0     |       |
| 58_vs_k141_09509          | [full]   | 5486  | No   | NA | 2     | 1 | Low-quality    | Genome-fragment | 12.99           | 0     |       |
| 51_vs_k141_46119          | [full]   | 5487  | No   | NA | 0     | 0 | Low-quality    | Genome-fragment | 13.72           | 0     |       |
| 517_vs_k141_56351         | [full]   | 5490  | Yes  |    | 2991  | 1 | 1              | Low-quality     | Genome-fragment | 1.39  | 45.52 |
| 52_vs_k141_6602           | [full]   | 2093  | No   | NA | 0     | 2 | Not-determined | Genome-fragment | NA              | 0     |       |
| 52_vs_k141_10519          | [full]   | 1782  | No   | NA | 0     | 0 | Not-determined | Genome-fragment | NA              | 0     |       |
| 52_vs_k141_6628           | [full]   | 8489  | No   | NA | 0     | 6 | Not-determined | Genome-fragment | NA              | 0     |       |
| 59_extracted_k141_54278   |          | 5491  | No   | NA | 0     | 0 | Low-quality    | Genome-fragment | 3.16            | 0     |       |
| 511_extracted_k141_7178   |          | 5491  | No   | NA | 5     | 0 | Low-quality    | Genome-fragment | 12.16           | 0     |       |
| 58_vs_k141_44439          | [full]   | 5491  | No   | NA | 0     | 0 | Low-quality    | Genome-fragment | NA              | 0     |       |
| 52_vs_k141_20583          | [intzme] | 1007  | No   | NA | 0     | 0 | Not-determined | Genome-fragment | NA              | 0     |       |
| 513_vs_108950             | [full]   | 5493  | No   | NA | 0     | 3 | Low-quality    | Genome-fragment | 4.72            | 0     |       |
| 515_extracted_76253       |          | 5493  | No   | NA | 0     | 0 | Low-quality    | Genome-fragment | 8.35            | 0     |       |
| 517_extracted_k141_82261  |          | 5495  | No   | NA | 1     | 0 | Low-quality    | Genome-fragment | 6.83            | 0     |       |
| 59_vs_k141_29751          | [full]   | 5496  | No   | NA | 4     | 1 | Low-quality    | Genome-fragment | 11.54           | 0     |       |
| 54_extracted_87           |          | 2416  | No   | NA | 0     | 0 | Not-determined | Genome-fragment | NA              | 0     |       |
| 54_extracted_93           |          | 1144  | No   | NA | 0     | 1 | Not-determined | Genome-fragment | NA              | 0     |       |
| 516_vs_50694              | [full]   | 5498  | No   | NA | 0     | 0 | Low-quality    | Genome-fragment | 13.08           | 0     |       |
| 54_extracted_159          |          | 1254  | No   | NA | 1     | 1 | Not-determined | Genome-fragment | NA              | 0     |       |
| 54_extracted_305          |          | 1003  | No   | NA | 0     | 1 | Not-determined | Genome-fragment | NA              | 0     |       |
| 54_extracted_320          |          | 10416 | No   | NA | 0     | 7 | Not-determined | Genome-fragment | NA              | 0     |       |
| 513_extracted_74508       |          | 1540  | No   | NA | 0     | 2 | Not-determined | Genome-fragment | NA              | 0     |       |
| 54_extracted_568          |          | 5501  | No   | NA | 0     | 2 | Low-quality    | Genome-fragment | 6.82            | 0     |       |
| 53_extracted_k141_89687   |          | 6401  | No   | NA | 0     | 2 | Not-determined | Genome-fragment | NA              | 0     |       |
| 54_extracted_651          |          | 5503  | No   | NA | 0     | 1 | Low-quality    | Genome-fragment | 3.46            | 0     |       |
| 512_vs_k141_138066        | [full]   | 1144  | No   | NA | 0     | 1 | Not-determined | Genome-fragment | NA              | 0     |       |
| 58_extracted_k141_54367   |          | 5506  | No   | NA | 1     | 0 | Low-quality    | Genome-fragment | 5.5             | 0     |       |
| 54_extracted_813          |          | 5506  | No   | NA | 0     | 5 | Low-quality    | Genome-fragment | 16.56           | 0     |       |
| 59_vs_k141_61245          | [full]   | 6818  | No   | NA | 1     | 1 | Not-determined | Genome-fragment | NA              | 0     |       |
| 54_extracted_900          |          | 5510  | Yes  |    | 3611  | 1 | 1              | Low-quality     | Genome-fragment | 7.22  | 34.46 |
| 54_extracted_931          |          | 3238  | No   | NA | 0     | 2 | Not-determined | Genome-fragment | NA              | 0     |       |
| 54_extracted_934          |          | 7311  | No   | NA | 0     | 6 | Not-determined | Genome-fragment | NA              | 0     |       |
| 54_extracted_938          |          | 1494  | No   | NA | 0     | 1 | Not-determined | Genome-fragment | NA              | 0     |       |
| 511_vs_k141_79976         | [full]   | 6217  | No   | NA | 0     | 5 | Not-determined | Genome-fragment | NA              | 0     |       |
| 53_vs_k141_15749          | [full]   | 5510  | No   | NA | 0     | 3 | Low-quality    | Genome-fragment | 3.97            | 0     |       |
| 54_extracted_1280         |          | 5510  | No   | NA | 4     | 0 | Low-quality    | Genome-fragment | 3.27            | 0     |       |
| 54_extracted_1283         |          | 3962  | No   | NA | 0     | 0 | Not-determined | Genome-fragment | NA              | 0     |       |
| 517_extracted_k141_2850   |          | 2449  | No</ |    |       |   |                |                 |                 |       |       |



|                             |       |     |    |      |    |                  |                 |                 |       |
|-----------------------------|-------|-----|----|------|----|------------------|-----------------|-----------------|-------|
| S4_extracted_3246           | 4290  | No  | NA | 0    | 5  | Not-determined   | Genome-fragment | NA              | 0     |
| S10_vs_35850  full          | 5528  | No  | NA | 0    | 0  | Low-quality      | Genome-fragment | NA              | 11.09 |
| S4_extracted_3272           | 3324  | No  | NA | 0    | 3  | Not-determined   | Genome-fragment | NA              | 0     |
| S4_extracted_26363          | 5528  | No  | NA | 3    | 0  | Low-quality      | Genome-fragment | NA              | 18.22 |
| S13_vs_55264  full          | 5532  | No  | NA | 0    | 1  | Low-quality      | Genome-fragment | NA              | 10.71 |
| S5_vs_k141_126025  full     | 5532  | No  | NA | 1    | 0  | Low-quality      | Genome-fragment | NA              | 10.67 |
| S4_extracted_3600           | 1020  | No  | NA | 0    | 1  | Not-determined   | Genome-fragment | NA              | 0     |
| S10_extracted_90803         | 5532  | No  | NA | 1    | 0  | Low-quality      | Genome-fragment | NA              | 3.39  |
| S16_vs_33661  full          | 5533  | No  | NA | 1    | 1  | Low-quality      | Genome-fragment | NA              | 12.09 |
| S12_vs_k141_8194  full      | 5533  | No  | NA | 2    | 0  | Low-quality      | Genome-fragment | NA              | 22.01 |
| S4_extracted_3743           | 12812 | No  | NA | 0    | 6  | Not-determined   | Genome-fragment | NA              | 0     |
| S16_vs_49701  full          | 5537  | No  | NA | 1    | 0  | Low-quality      | Genome-fragment | NA              | 13.51 |
| S4_extracted_3876           | 8073  | No  | NA | 0    | 3  | Not-determined   | Genome-fragment | NA              | 0     |
| S4_extracted_3906           | 1079  | No  | NA | 0    | 1  | Not-determined   | Genome-fragment | NA              | 0     |
| S4_extracted_3960           | 1054  | No  | NA | 0    | 0  | Not-determined   | Genome-fragment | NA              | 0     |
| S16_extracted_105379        | 5539  | No  | NA | 1    | 1  | Low-quality      | Genome-fragment | NA              | 1.53  |
| S11_extracted_k141_97323    | 5540  | No  | NA | 0    | 0  | Low-quality      | Genome-fragment | NA              | 5.01  |
| S4_extracted_4027           | 1205  | No  | NA | 0    | 1  | Not-determined   | Genome-fragment | NA              | 0     |
| S14_vs_k141_75052  full     | 5540  | No  | NA | 0    | 0  | Low-quality      | Genome-fragment | NA              | 12.35 |
| S12_extracted_97619         | 5541  | No  | NA | 0    | 3  | Low-quality      | Genome-fragment | NA              | 4.9   |
| S12_vs_k141_167435  full    | 5543  | No  | NA | 0    | 0  | Low-quality      | Genome-fragment | NA              | 12.92 |
| S9_vs_k141_21657  full      | 5545  | No  | NA | 0    | 0  | Low-quality      | Genome-fragment | NA              | 13.11 |
| S4_extracted_4244           | 6019  | No  | NA | 0    | 3  | Not-determined   | Genome-fragment | NA              | 0     |
| S16_vs_142354  full         | 5546  | No  | NA | 1    | 0  | Low-quality      | Genome-fragment | NA              | 9.19  |
| S4_extracted_4456           | 7906  | No  | NA | 0    | 2  | Not-determined   | Genome-fragment | NA              | 0     |
| S14_vs_k141_24171  full     | 5547  | No  | NA | 2    | 0  | Low-quality      | Genome-fragment | NA              | 12.93 |
| S4_extracted_4533           | 2592  | No  | NA | 0    | 1  | Not-determined   | Genome-fragment | NA              | 0     |
| S14_extracted_k141_110263   | 5548  | No  | NA | 14   | 0  | Low-quality      | Genome-fragment | NA              | 18.25 |
| S5_extracted_k141_130187    | 5549  | No  | NA | 15   | 0  | Low-quality      | Genome-fragment | NA              | 18.26 |
| S4_extracted_4769           | 1069  | No  | NA | 0    | 1  | Not-determined   | Genome-fragment | NA              | 0     |
| S10_extracted_116234        | 5549  | No  | NA | 2    | 0  | Low-quality      | Genome-fragment | NA              | 10.9  |
| S4_extracted_4838           | 99642 | No  | NA | 12   | 1  | Complete         | High-quality    | NA              | 100   |
| S4_extracted_4887           | 12974 | No  | NA | 0    | 5  | Not-determined   | Genome-fragment | NA              | 0     |
| S4_extracted_4891           | 43130 | No  | NA | 11   | 1  | Medium-quality   | Genome-fragment | NA              | 64.14 |
| S17_extracted_k141_116050   | 5550  | No  | NA | 2    | 1  | Low-quality      | Genome-fragment | NA              | 9.14  |
| S4_extracted_5021           | 55316 | No  | NA | 0    | 0  | Medium-quality   | Genome-fragment | NA              | 66.65 |
| S4_extracted_5070           | 1266  | No  | NA | 0    | 0  | Not-determined   | Genome-fragment | NA              | 0     |
| S4_extracted_5135           | 1560  | No  | NA | 0    | 0  | Not-determined   | Genome-fragment | NA              | 0     |
| S4_extracted_5223           | 3507  | No  | NA | 1    | 1  | Not-determined   | Genome-fragment | NA              | 0     |
| S4_extracted_5315           | 1252  | No  | NA | 0    | 1  | Not-determined   | Genome-fragment | NA              | 0     |
| S5_extracted_k141_59064     | 5550  | Yes | NA | 2044 | 1  | 2                | Low-quality     | Genome-fragment | 2.94  |
| S4_extracted_5426           | 1014  | No  | NA | 0    | 0  | Not-determined   | Genome-fragment | NA              | 0     |
| S12_extracted_k141_8249     | 5550  | No  | NA | 0    | 0  | Low-quality      | Genome-fragment | NA              | 3.05  |
| S4_extracted_5533           | 1362  | No  | NA | 0    | 2  | Not-determined   | Genome-fragment | NA              | 0     |
| S1_extracted_k141_51670     | 5551  | No  | NA | 0    | 4  | Low-quality      | Genome-fragment | NA              | 2.99  |
| S13_extracted_34458         | 5553  | No  | NA | 0    | 3  | Low-quality      | Genome-fragment | NA              | 8.45  |
| S4_extracted_5695           | 5127  | No  | NA | 0    | 0  | Not-determined   | Genome-fragment | NA              | 0     |
| S4_extracted_5704           | 1006  | No  | NA | 0    | 0  | Not-determined   | Genome-fragment | NA              | 0     |
| S8_extracted_k141_168545    | 5553  | No  | NA | 0    | 2  | Low-quality      | Genome-fragment | NA              | 4.8   |
| S11_vs_k141_72783  full     | 5555  | No  | NA | 0    | 0  | Low-quality      | Genome-fragment | NA              | 3.61  |
| S5_extracted_k141_83224     | 5555  | No  | NA | 1    | 0  | Low-quality      | Genome-fragment | NA              | 3.61  |
| S4_extracted_6256           | 1462  | No  | NA | 1    | 1  | Not-determined   | Genome-fragment | NA              | 9     |
| S7_extracted_16073          | 5557  | No  | NA | 3    | 0  | Low-quality      | Genome-fragment | NA              | 0     |
| S13_extracted_23010         | 5559  | No  | NA | 4    | 0  | Low-quality      | Genome-fragment | NA              | 12.28 |
| S13_vs_10400  full          | 5559  | No  | NA | 0    | 0  | Low-quality      | Genome-fragment | NA              | 10.05 |
| S4_extracted_6616           | 1360  | No  | NA | 0    | 1  | Not-determined   | Genome-fragment | NA              | 0     |
| S1_vs_k141_31601  full      | 5560  | No  | NA | 4    | 0  | Low-quality      | Genome-fragment | NA              | 14.92 |
| S16_vs_27679  full          | 5560  | No  | NA | 0    | 2  | Low-quality      | Genome-fragment | NA              | 4.15  |
| S16_vs_116757  full         | 5560  | No  | NA | 0    | 0  | Low-quality      | Genome-fragment | NA              | 13.4  |
| S4_extracted_6713           | 1473  | No  | NA | 0    | 0  | Not-determined   | Genome-fragment | NA              | 0     |
| S12_vs_k141_111478  full    | 5560  | Yes | NA | 4142 | 2  | 2                | Low-quality     | Genome-fragment | 9.1   |
| S13_extracted_101278        | 5561  | No  | NA | 0    | 0  | Low-quality      | Genome-fragment | NA              | 11.92 |
| S4_extracted_6854           | 1963  | No  | NA | 0    | 1  | Not-determined   | Genome-fragment | NA              | 0     |
| S4_extracted_6899           | 2083  | No  | NA | 0    | 0  | Not-determined   | Genome-fragment | NA              | 0     |
| S4_extracted_6904           | 1007  | No  | NA | 2    | 2  | Not-determined   | Genome-fragment | NA              | 0     |
| S12_vs_k141_28168  full     | 5561  | Yes | NA | 3104 | 1  | 1                | Low-quality     | Genome-fragment | 8.1   |
| S10_vs_68814  full          | 5563  | No  | NA | 1    | 0  | Low-quality      | Genome-fragment | NA              | 11.11 |
| S4_extracted_7129           | 1001  | No  | NA | 0    | 0  | Not-determined   | Genome-fragment | NA              | 0     |
| S8_extracted_k141_95536     | 5563  | No  | NA | 0    | 4  | Low-quality      | Genome-fragment | NA              | 4.95  |
| S16_extracted_16094         | 5564  | No  | NA | 8    | 0  | Low-quality      | Genome-fragment | NA              | 18.37 |
| S16_extracted_149543        | 5564  | No  | NA | 0    | 4  | Low-quality      | Genome-fragment | NA              | 14.53 |
| S3_vs_k141_46862  full      | 5565  | Yes | NA | 1426 | 2  | 2                | Low-quality     | Genome-fragment | 2.37  |
| S13_vs_129220  full         | 5566  | No  | NA | 0    | 0  | Low-quality      | Genome-fragment | NA              | 12.41 |
| S1_extracted_k141_80925     | 5567  | No  | NA | 0    | 2  | Low-quality      | Genome-fragment | NA              | 10.58 |
| S4_extracted_7541           | 3185  | No  | NA | 0    | 0  | Not-determined   | Genome-fragment | NA              | 0     |
| S4_extracted_7629           | 1114  | No  | NA | 0    | 0  | Not-determined   | Genome-fragment | NA              | 0     |
| S8_extracted_k141_1292      | 5568  | Yes | NA | 4536 | 1  | 2                | Low-quality     | Genome-fragment | 8.46  |
| S14_vs_k141_54431  full     | 5571  | No  | NA | 1    | 0  | Low-quality      | Genome-fragment | NA              | 10.18 |
| S4_extracted_7734           | 1386  | No  | NA | 0    | 1  | Not-determined   | Genome-fragment | NA              | 0     |
| S4_extracted_7828           | 1031  | No  | NA | 0    | 0  | Not-determined   | Genome-fragment | NA              | 0     |
| S1_vs_k141_114341  full     | 5572  | No  | NA | 0    | 3  | Low-quality      | Genome-fragment | NA              | 2.63  |
| S15_extracted_30135         | 5574  | No  | NA | 0    | 2  | Low-quality      | Genome-fragment | NA              | 11.54 |
| S9_vs_k141_28505  full      | 5576  | No  | NA | 6    | 0  | Low-quality      | Genome-fragment | NA              | 14.73 |
| S8_extracted_k141_18750     | 5577  | No  | NA | 6    | 0  | Low-quality      | Genome-fragment | NA              | 17.18 |
| S3_extracted_k141_21194     | 5578  | No  | NA | 0    | 5  | Low-quality      | Genome-fragment | NA              | 2.53  |
| S4_extracted_7965           | 1203  | No  | NA | 0    | 0  | Not-determined   | Genome-fragment | NA              | 0     |
| S4_extracted_7996           | 1210  | No  | NA | 0    | 2  | Not-determined   | Genome-fragment | NA              | 0     |
| S4_extracted_8018           | 3920  | No  | NA | 0    | 3  | Not-determined   | Genome-fragment | NA              | 0     |
| S3_vs_k141_13616  full      | 5578  | Yes | NA | 2378 | 1  | 0                | Low-quality     | Genome-fragment | 7.15  |
| S5_vs_k141_143919  full     | 5578  | Yes | NA | 4936 | 1  | 1                | Low-quality     | Genome-fragment | 14.15 |
| S4_extracted_8231           | 1247  | No  | NA | 0    | 1  | Not-determined   | Genome-fragment | NA              | 0     |
| S4_extracted_8239           | 1060  | No  | NA | 0    | 0  | Not-determined   | Genome-fragment | NA              | 0     |
| S5_extracted_k141_52531     | 5579  | No  | NA | 1    | 0  | Low-quality      | Genome-fragment | NA              | 13.23 |
| S8_extracted_k141_154413    | 5580  | No  | NA | 1    | 1  | Low-quality      | Genome-fragment | NA              | 17.53 |
| S14_extracted_k141_102870   | 5581  | No  | NA | 0    | 0  | Low-quality      | Genome-fragment | NA              | 15.03 |
| S3_extracted_k141_109213    | 5581  | No  | NA | 1    | 0  | Low-quality      | Genome-fragment | NA              | 4.17  |
| S4_extracted_8448           | 3494  | No  | NA | 0    | 4  | Not-determined   | Genome-fragment | NA              | 0     |
| S4_extracted_8474           | 11599 | No  | NA | 0    | 6  | Not-determined   | Genome-fragment | NA              | 0     |
| S17_extracted_k141_103703   | 5583  | No  | NA | 0    | 1  | Low-quality      | Genome-fragment | NA              | 3.05  |
| S1_vs_k141_58904  full      | 5583  | No  | NA | 3    | 0  | Low-quality      | Genome-fragment | NA              | 9.12  |
| S4_extracted_8497           | 2180  | No  | NA | 0    | 1  | Not-determined   | Genome-fragment | NA              | 0     |
| S12_vs_k141_879141  full    | 5583  | No  | NA | 0    | 1  | Low-quality      | Genome-fragment | NA              | 7.63  |
| S8_extracted_k141_1164      | 5584  | No  | NA | 1    | 0  | Low-quality      | Genome-fragment | NA              | 5.59  |
| S5_extracted_k141_17967     | 5585  | No  | NA | 8    | 0  | Low-quality      | Genome-fragment | NA              | 25.48 |
| S7_extracted_38239          | 5586  | No  | NA | 0    | 0  | Low-quality      | Genome-fragment | NA              | 8.51  |
| S3_extracted_k141_101039    | 5587  | No  | NA | 0    | 0  | Low-quality      | Genome-fragment | NA              | 6.27  |
| S8_extracted_k141_104224    | 5587  | No  | NA | 0    | 1  | Low-quality      | Genome-fragment | NA              | 13.78 |
| S4_extracted_8998           | 2009  | No  | NA | 0    | 1  | Not-determined   | Genome-fragment | NA              | 0     |
| S4_extracted_9017           | 31165 | No  | NA | 0    | 12 | Not-determined   | Genome-fragment | NA              | 0     |
| S4_extracted_9039           | 1146  | No  | NA | 0    | 0  | Not-determined   | Genome-fragment | NA              | 0     |
| S11_extracted_k141_44538    | 5594  | No  | NA | 1    | 0  | Low-quality      | Genome-fragment | NA              | 8.97  |
| S16_vs_29959  full          | 5594  | Yes | NA | 2152 | 3  | 0                | Low-quality     | Genome-fragment | 2.49  |
| S11_extracted_k141_48072    | 5598  | No  | NA | 0    | 0  | Low-quality      | Genome-fragment | NA              | 7.32  |
| S5_extracted_k141_112989    | 5600  | No  | NA | 0    | 3  | Low-quality      | Genome-fragment | NA              | 5.93  |
| S16_extracted_77948         | 5601  | No  | NA | 0    | 0  | Low-quality      | Genome-fragment | NA              | 1.51  |
| S4_extracted_9530           | 1867  | No  | NA | 0    | 0  | Not-determined   | Genome-fragment | NA              | 0     |
| S4_extracted_9637           | 1497  | No  | NA | 0    | 1  | Not-determined   | Genome-fragment | NA              | 0     |
| S4_extracted_9651           | 2264  | No  | NA | 0    | 0  | Not-determined   | Genome-fragment | NA              | 0     |
| S14_extracted_k141_41367    | 5602  | No  | NA | 0    | 0  | Low-quality      | Genome-fragment | NA              | 3.92  |
| S10_extracted_104654        | 5604  | No  | NA | 4    | 0  | Low-quality      | Genome-fragment | NA              | 13.91 |
| S4_extracted_13842          | 5606  | No  | NA | 2    | 0  | Low-quality      | Genome-fragment | NA              | 24.01 |
| S4_extracted_9894           | 1582  | No  | NA | 0    | 2  | Not-determined   | Genome-fragment | NA              | 0     |
| S3_vs_k141_115502  full     | 5608  | No  | NA | 0    | 4  | Low-quality      | Genome-fragment | NA              | 12.72 |
| S4_extracted_10200          | 2315  | No  | NA | 0    | 0  | Not-determined   | Genome-fragment | NA              | 0     |
| S4_extracted_10252          | 1620  | No  | NA | 0    | 1  | Not-determined   | Genome-fragment | NA              | 0     |
| S7_extracted_11278          | 5611  | No  | NA | 4    | 0  | Low-quality      | Genome-fragment | NA              | 11.91 |
| S4_extracted_10378          | 1971  | No  | NA | 0    | 0  | Not-determined   | Genome-fragment | NA              | 0     |
| S12_extracted_k141_155019   | 5617  | No  | NA | 0    | 1  | Low-quality      | Genome-fragment | NA              | 11.73 |
| S5_vs_k141_134648  full     | 5618  | No  | NA | 0    | 0  | Low-quality      | Genome-fragment | NA              | 12.66 |
| S4_extracted_10445          | 4270  | No  | NA | 0    | 5  | Not-determined   | Genome-fragment | NA              | 0     |
| S4_extracted_10506          | 50427 | No  | NA | 16   | 0  | Complete         | High-quality    | NA              | 100   |
| S16_extracted_43986         | 5621  | No  | NA | 0    | 2  | Low-quality      | Genome-fragment | NA              | 0.5   |
| S12_vs_k141_155672  full    | 5622  | No  | NA | 0    | 1  | Low-quality      | Genome-fragment | NA              | 13.05 |
| S10_extracted_115577        | 5626  | No  | NA | 1    | 0  | Low-quality      | Genome-fragment | NA              | 10.3  |
| S4_extracted_10667          | 1762  | No  | NA | 0    | 2  | Not-determined   | Genome-fragment | NA              | 1.5   |
| S17_extracted_k141_70947    | 5628  | No  | NA | 0    | 3  | Low-quality      | Genome-fragment | NA              | 0     |
| S4_extracted_10780          | 6554  | No  | NA | 0    | 0  | Not-determined   | Genome-fragment | NA              | 0     |
| S13_vs_132092  full         | 5633  | No  | NA | 0    | 2  | Low-quality      | Genome-fragment | NA              | 14.12 |
| S4_extracted_10843          | 1533  | No  | NA | 0    | 1  | Not-determined   | Genome-fragment | NA              | 0     |
| S4_vs_VIRSorter_10786-cat_1 | 5633  | No  | NA | 4    | 0  | Low-quality      | Genome-fragment | NA              | 15.69 |
| S6_vs_k141_48906  full      | 5633  | No  | NA | 4    | 0  | Low-quality      | Genome-fragment | NA              | 10.94 |
| S11_vs_k141_58905  full     | 5637  | No  | NA | 1    | 0  | Low-quality      | Genome-fragment | NA              | 12.82 |
| S3_extracted_k141_96314     | 5637  | No  | NA | 0    | 0  | Low-quality      | Genome-fragment | NA              | 7.14  |
| S6_vs_k141_13074  full      | 5638  | No  | NA | 0    | 2  | Low-quality      | Genome-fragment | NA              | 5.92  |
| S4_extracted_11093          | 4004  | No  | NA | 0    | 1  | Not-determined   | Genome-fragment | NA              | 0     |
| S4_extracted_11097          | 17775 | No  | NA | 0    | 7  | Not-determined   | Genome-fragment | NA              | 0     |
| S16_extracted_47990         | 5640  | No  | NA | 0    | 0  | Low-quality      | Genome-fragment | NA              | 6.85  |
| S4_extracted_11300          | 1208  | No  | NA | 0    | 0  | Not-determined</ |                 |                 |       |



|                           |       |     |    |      |    |                |                 |                 |       |
|---------------------------|-------|-----|----|------|----|----------------|-----------------|-----------------|-------|
| 54_extracted_12936        | 1113  | No  | NA | 0    | 0  | Not-determined | Genome-fragment | NA              | 0     |
| 54_extracted_13014        | 7448  | No  | NA | 0    | 4  | Not-determined | Genome-fragment | NA              | 0     |
| 57_extracted_9392         | 5653  | No  | NA | 0    | 0  | Low-quality    | Genome-fragment | NA              | 5.42  |
| 54_extracted_13195        | 1212  | No  | NA | 0    | 0  | Not-determined | Genome-fragment | NA              | 0     |
| 53_extracted_k141_67596   | 5655  | Yes | NA | 4899 | 2  | 1              | Low-quality     | Genome-fragment | 3.2   |
| 53_vs_k141_206831[full]   | 5656  | No  | NA | 1    | 0  | Low-quality    | Genome-fragment | NA              | 11.51 |
| 54_extracted_13353        | 49534 | No  | NA | 25   | 0  | High-quality   | Genome-fragment | NA              | 100   |
| 511_vs_k141_652001[full]  | 5658  | No  | NA | 0    | 0  | Low-quality    | Genome-fragment | NA              | 10.84 |
| 54_extracted_13395        | 21440 | No  | NA | 0    | 9  | Not-determined | Genome-fragment | NA              | 0     |
| 54_extracted_13444        | 1788  | No  | NA | 0    | 2  | Not-determined | Genome-fragment | NA              | 0     |
| 510_vs_15567[full]        | 5658  | No  | NA | 0    | 2  | Low-quality    | Genome-fragment | NA              | 1.51  |
| 54_extracted_13612        | 3392  | No  | NA | 0    | 1  | Not-determined | Genome-fragment | NA              | 0     |
| 54_extracted_13627        | 56749 | No  | NA | 8    | 0  | Medium-quality | Genome-fragment | NA              | 74.12 |
| 54_extracted_13631        | 1187  | No  | NA | 0    | 0  | Not-determined | Genome-fragment | NA              | 0     |
| 54_extracted_13682        | 1517  | No  | NA | 0    | 0  | Not-determined | Genome-fragment | NA              | 0     |
| 55_extracted_k141_21892   | 5659  | No  | NA | 0    | 1  | Low-quality    | Genome-fragment | NA              | 6.31  |
| 54_extracted_13738        | 1136  | No  | NA | 0    | 2  | Not-determined | Genome-fragment | NA              | 0     |
| 54_extracted_13759        | 21084 | No  | NA | 15   | 0  | Medium-quality | Genome-fragment | NA              | 53.32 |
| 54_extracted_13762        | 10812 | No  | NA | 0    | 3  | Not-determined | Genome-fragment | NA              | 0     |
| 54_extracted_13783        | 46158 | No  | NA | 0    | 51 | Not-determined | Genome-fragment | NA              | 0     |
| 54_extracted_13831        | 16727 | No  | NA | 6    | 0  | Medium-quality | Genome-fragment | NA              | 56.3  |
| 57_extracted_49257        | 5659  | No  | NA | 4    | 0  | Low-quality    | Genome-fragment | NA              | 12.12 |
| 516_extracted_112304      | 5660  | No  | NA | 0    | 5  | Low-quality    | Genome-fragment | NA              | 7.95  |
| 54_extracted_13941        | 1749  | No  | NA | 0    | 1  | Not-determined | Genome-fragment | NA              | 0     |
| 514_extracted_k141_103264 | 5661  | No  | NA | 5    | 0  | Low-quality    | Genome-fragment | NA              | 12.99 |
| 57_vs_756571[full]        | 5662  | No  | NA | 0    | 5  | Low-quality    | Genome-fragment | NA              | 12.85 |
| 54_extracted_14013        | 6368  | No  | NA | 0    | 5  | Not-determined | Genome-fragment | NA              | 0     |
| 54_extracted_14033        | 1470  | No  | NA | 0    | 1  | Not-determined | Genome-fragment | NA              | 0     |
| 54_extracted_14053        | 1229  | No  | NA | 0    | 0  | Not-determined | Genome-fragment | NA              | 0     |
| 510_vs_48928[full]        | 5662  | No  | NA | 0    | 1  | Low-quality    | Genome-fragment | NA              | 8.73  |
| 58_extracted_k141_182098  | 5664  | No  | NA | 7    | 0  | Low-quality    | Genome-fragment | NA              | 8.35  |
| 54_extracted_14146        | 4821  | No  | NA | 1    | 2  | Not-determined | Genome-fragment | NA              | 11.5  |
| 517_vs_k141_118152[full]  | 5666  | No  | NA | 1    | 0  | Low-quality    | Genome-fragment | NA              | 8.57  |
| 54_extracted_14229        | 2005  | No  | NA | 0    | 1  | Not-determined | Genome-fragment | NA              | 0     |
| 54_extracted_14255        | 1121  | No  | NA | 0    | 1  | Not-determined | Genome-fragment | NA              | 0     |
| 54_extracted_14340        | 2887  | No  | NA | 0    | 0  | Not-determined | Genome-fragment | NA              | 0     |
| 57_vs_132201[full]        | 5668  | No  | NA | 0    | 4  | Low-quality    | Genome-fragment | NA              | 9.61  |
| 512_vs_k141_574621[full]  | 5668  | No  | NA | 4    | 0  | Low-quality    | Genome-fragment | NA              | 4.46  |
| 512_extracted_k141_143169 | 5669  | No  | NA | 1    | 1  | Low-quality    | Genome-fragment | NA              | 11.81 |
| 55_extracted_k141_140196  | 5670  | No  | NA | 1    | 0  | Low-quality    | Genome-fragment | NA              | 3.08  |
| 54_extracted_14623        | 1067  | No  | NA | 0    | 0  | Not-determined | Genome-fragment | NA              | 0     |
| 56_extracted_k141_51287   | 5672  | No  | NA | 0    | 1  | Low-quality    | Genome-fragment | NA              | 13.44 |
| 54_extracted_14772        | 7354  | No  | NA | 0    | 4  | Not-determined | Genome-fragment | NA              | 0     |
| 54_extracted_14806        | 1023  | No  | NA | 0    | 1  | Not-determined | Genome-fragment | NA              | 0     |
| 54_extracted_14876        | 1886  | No  | NA | 0    | 1  | Not-determined | Genome-fragment | NA              | 0     |
| 54_extracted_14924        | 1823  | No  | NA | 0    | 0  | Not-determined | Genome-fragment | NA              | 0     |
| 53_vs_k141_33225[full]    | 5674  | No  | NA | 2    | 0  | Low-quality    | Genome-fragment | NA              | 12.56 |
| 54_extracted_15016        | 1975  | No  | NA | 0    | 1  | Not-determined | Genome-fragment | NA              | 0     |
| 54_extracted_15031        | 4345  | No  | NA | 0    | 0  | Not-determined | Genome-fragment | NA              | 0     |
| 54_extracted_15054        | 1398  | No  | NA | 0    | 2  | Not-determined | Genome-fragment | NA              | 0     |
| 57_vs_495371[full]        | 5675  | No  | NA | 2    | 1  | Low-quality    | Genome-fragment | NA              | 5.4   |
| 54_extracted_15141        | 1224  | No  | NA | 1    | 3  | Not-determined | Genome-fragment | NA              | 0     |
| 54_extracted_15186        | 8353  | No  | NA | 0    | 4  | Not-determined | Genome-fragment | NA              | 0     |
| 53_vs_k141_858641[full]   | 5676  | No  | NA | 0    | 0  | Low-quality    | Genome-fragment | NA              | 3     |
| 58_extracted_k141_29704   | 5676  | No  | NA | 4    | 0  | Low-quality    | Genome-fragment | NA              | 17.54 |
| 58_vs_k141_26319[full]    | 5676  | No  | NA | 0    | 4  | Low-quality    | Genome-fragment | NA              | 12.16 |
| 516_vs_70662[full]        | 5678  | No  | NA | 0    | 4  | Low-quality    | Genome-fragment | NA              | 1.32  |
| 512_vs_k141_136959[full]  | 5678  | No  | NA | 3    | 0  | Low-quality    | Genome-fragment | NA              | 15.46 |
| 510_vs_120255[full]       | 5679  | No  | NA | 0    | 0  | Low-quality    | Genome-fragment | NA              | 11.5  |
| 510_extracted_63153       | 5680  | No  | NA | 1    | 0  | Low-quality    | Genome-fragment | NA              | 13.48 |
| 58_vs_k141_183547[full]   | 5680  | No  | NA | 3    | 0  | Low-quality    | Genome-fragment | NA              | 7.6   |
| 54_extracted_16093        | 5001  | No  | NA | 0    | 3  | Not-determined | Genome-fragment | NA              | 0     |
| 54_extracted_16167        | 2190  | No  | NA | 0    | 0  | Not-determined | Genome-fragment | NA              | 0     |
| 53_vs_k141_85361[full]    | 5683  | No  | NA | 3    | 0  | Low-quality    | Genome-fragment | NA              | 3.46  |
| 54_extracted_16226        | 1589  | No  | NA | 0    | 1  | Not-determined | Genome-fragment | NA              | 0     |
| 54_extracted_16239        | 1045  | No  | NA | 0    | 1  | Not-determined | Genome-fragment | NA              | 0     |
| 52_vs_k141_15731[full]    | 5683  | No  | NA | 0    | 2  | Low-quality    | Genome-fragment | NA              | 4.8   |
| 517_extracted_k141_66803  | 5685  | No  | NA | 1    | 0  | Low-quality    | Genome-fragment | NA              | 12.06 |
| 54_extracted_16411        | 1185  | No  | NA | 0    | 0  | Not-determined | Genome-fragment | NA              | 0     |
| 510_vs_63296[full]        | 5685  | No  | NA | 0    | 0  | Low-quality    | Genome-fragment | NA              | 11.75 |
| 54_extracted_16485        | 12964 | No  | NA | 4    | 0  | High-quality   | High-quality    | NA              | 94.97 |
| 54_extracted_16518        | 1456  | No  | NA | 0    | 0  | Not-determined | Genome-fragment | NA              | 0     |
| 54_extracted_16607        | 2735  | No  | NA | 0    | 1  | Not-determined | Genome-fragment | NA              | 0     |
| 54_extracted_16707        | 1158  | No  | NA | 0    | 0  | Not-determined | Genome-fragment | NA              | 0     |
| 54_extracted_16751        | 3765  | No  | NA | 0    | 0  | Not-determined | Genome-fragment | NA              | 0     |
| 54_extracted_16770        | 6612  | No  | NA | 0    | 5  | Not-determined | Genome-fragment | NA              | 0     |
| 54_extracted_16926        | 1005  | No  | NA | 0    | 1  | Not-determined | Genome-fragment | NA              | 0     |
| 54_extracted_16943        | 1693  | No  | NA | 0    | 2  | Not-determined | Genome-fragment | NA              | 0     |
| 54_extracted_17150        | 2027  | No  | NA | 0    | 0  | Not-determined | Genome-fragment | NA              | 0     |
| 53_vs_k141_4752[full]     | 5686  | No  | NA | 5    | 0  | Low-quality    | Genome-fragment | NA              | 14.88 |
| 54_extracted_17180        | 1139  | No  | NA | 0    | 2  | Not-determined | Genome-fragment | NA              | 0     |
| 57_vs_110926[full]        | 5688  | No  | NA | 0    | 0  | Low-quality    | Genome-fragment | NA              | 16.63 |
| 55_vs_k141_64019[full]    | 5689  | No  | NA | 6    | 0  | Low-quality    | Genome-fragment | NA              | 16.28 |
| 510_vs_50036[full]        | 5692  | No  | NA | 6    | 0  | Low-quality    | Genome-fragment | NA              | 15.23 |
| 54_extracted_17711        | 3842  | No  | NA | 0    | 2  | Not-determined | Genome-fragment | NA              | 0     |
| 54_extracted_14419        | 5693  | No  | NA | 2    | 0  | Low-quality    | Genome-fragment | NA              | 11.91 |
| 54_extracted_17948        | 6590  | No  | NA | 3    | 0  | High-quality   | High-quality    | NA              | 96.57 |
| 57_extracted_15952        | 5698  | No  | NA | 0    | 1  | Low-quality    | Genome-fragment | NA              | 7.04  |
| 54_extracted_18022        | 1415  | No  | NA | 0    | 2  | Not-determined | Genome-fragment | NA              | 0     |
| 54_extracted_18094        | 1574  | No  | NA | 0    | 0  | Not-determined | Genome-fragment | NA              | 0     |
| 512_extracted_k141_92952  | 5698  | No  | NA | 1    | 0  | Low-quality    | Genome-fragment | NA              | 8.96  |
| 58_extracted_k141_177316  | 5700  | No  | NA | 7    | 0  | Low-quality    | Genome-fragment | NA              | 18.8  |
| 52_extracted_k141_6520    | 5701  | No  | NA | 1    | 0  | Low-quality    | Genome-fragment | NA              | 5.94  |
| 53_extracted_k141_69384   | 5702  | No  | NA | 4    | 0  | Low-quality    | Genome-fragment | NA              | 4.75  |
| 54_extracted_18184        | 1113  | No  | NA | 1    | 2  | Not-determined | Genome-fragment | NA              | 0     |
| 54_extracted_18266        | 10177 | No  | NA | 0    | 6  | Not-determined | Genome-fragment | NA              | 0     |
| 516_extracted_8862        | 5702  | No  | NA | 0    | 2  | Low-quality    | Genome-fragment | NA              | 2.85  |
| 516_vs_12716[full]        | 5702  | No  | NA | 6    | 0  | Low-quality    | Genome-fragment | NA              | 11.16 |
| 54_extracted_18392        | 1422  | No  | NA | 0    | 0  | Not-determined | Genome-fragment | NA              | 0     |
| 54_extracted_18437        | 1244  | No  | NA | 0    | 2  | Not-determined | Genome-fragment | NA              | 0     |
| 514_extracted_k141_819    | 5703  | No  | NA | 8    | 0  | Low-quality    | Genome-fragment | NA              | 18.81 |
| 54_extracted_18512        | 1485  | No  | NA | 0    | 0  | Not-determined | Genome-fragment | NA              | 0     |
| 515_extracted_37417       | 5703  | No  | NA | 0    | 0  | Low-quality    | Genome-fragment | NA              | 5.62  |
| 57_vs_78496[full]         | 5704  | No  | NA | 0    | 3  | Low-quality    | Genome-fragment | NA              | 4.77  |
| 54_extracted_18549        | 4402  | No  | NA | 0    | 0  | Not-determined | Genome-fragment | NA              | 0     |
| 54_extracted_18772        | 1592  | No  | NA | 0    | 0  | Not-determined | Genome-fragment | NA              | 0     |
| 54_extracted_18789        | 1381  | No  | NA | 0    | 0  | Not-determined | Genome-fragment | NA              | 0     |
| 516_vs_144798[full]       | 5705  | No  | NA | 5    | 0  | Low-quality    | Genome-fragment | NA              | 15.38 |
| 54_extracted_18803        | 2845  | No  | NA | 13   | 0  | Medium-quality | Genome-fragment | NA              | 69.23 |
| 57_extracted_15547        | 5708  | Yes | NA | 3727 | 1  | 1              | Low-quality     | Genome-fragment | 3.37  |
| 54_extracted_19014        | 1161  | No  | NA | 0    | 0  | Not-determined | Genome-fragment | NA              | 0     |
| 58_vs_k141_61592[full]    | 5708  | Yes | NA | 3377 | 1  | Low-quality    | Genome-fragment | NA              | 9.85  |
| 54_extracted_19248        | 1898  | No  | NA | 0    | 2  | Not-determined | Genome-fragment | NA              | 0     |
| 54_extracted_19253        | 1249  | No  | NA | 0    | 0  | Not-determined | Genome-fragment | NA              | 0     |
| 57_vs_200021[full]        | 5710  | No  | NA | 0    | 0  | Low-quality    | Genome-fragment | NA              | 15.74 |
| 54_extracted_19282        | 1848  | No  | NA | 0    | 2  | Not-determined | Genome-fragment | NA              | 0     |
| 515_vs_56979[full]        | 5710  | No  | NA | 1    | 1  | Low-quality    | Genome-fragment | NA              | 10.92 |
| 51_vs_k141_7231[full]     | 5716  | No  | NA | 3    | 0  | Low-quality    | Genome-fragment | NA              | 13.96 |
| 53_vs_k141_36998[full]    | 5717  | No  | NA | 0    | 0  | Low-quality    | Genome-fragment | NA              | 13.34 |
| 59_vs_k141_89695[full]    | 5718  | No  | NA | 3    | 0  | Low-quality    | Genome-fragment | NA              | 14.1  |
| 54_extracted_19785        | 2124  | No  | NA | 0    | 2  | Not-determined | Genome-fragment | NA              | 0     |
| 512_vs_k141_761270[full]  | 5718  | No  | NA | 0    | 0  | Low-quality    | Genome-fragment | NA              | 13.31 |
| 511_vs_k141_45782[full]   | 5720  | No  | NA | 1    | 0  | Low-quality    | Genome-fragment | NA              | 2.95  |
| 54_extracted_20038        | 3356  | No  | NA | 0    | 3  | Not-determined | Genome-fragment | NA              | 9.27  |
| 55_vs_k141_117601[full]   | 5722  | No  | NA | 0    | 1  | Low-quality    | Genome-fragment | NA              | 4.92  |
| 512_extracted_k141_89572  | 5722  | No  | NA | 1    | 1  | Low-quality    | Genome-fragment | NA              | 0     |
| 54_extracted_20233        | 1092  | No  | NA | 0    | 0  | Not-determined | Genome-fragment | NA              | 0     |
| 511_vs_k141_76094[full]   | 5723  | No  | NA | 0    | 0  | Low-quality    | Genome-fragment | NA              | 9.32  |
| 54_extracted_20440        | 63073 | No  | NA | 16   | 3  | Medium-quality | Genome-fragment | NA              | 83.01 |
| 54_extracted_20603        | 1931  | No  | NA | 0    | 2  | Not-determined | Genome-fragment | NA              | 0     |
| 517_vs_k141_91118[full]   | 5725  | No  | NA | 2    | 0  | Low-quality    | Genome-fragment | NA              | 7.1   |
| 57_vs_115418[full]        | 5726  | No  | NA | 0    | 0  | Low-quality    | Genome-fragment | NA              | 15.15 |
| 514_extracted_k141_113773 | 5728  | No  | NA | 4    | 0  | Low-quality    | Genome-fragment | NA              | 12.7  |
| 54_extracted_20965        | 7434  | No  | NA | 0    | 5  | Not-determined | Genome-fragment | NA              | 0     |
| 54_extracted_20981        | 1979  | No  | NA | 0    | 1  | Not-determined | Genome-fragment | NA              | 0     |
| 55_vs_k141_77757[full]    | 5729  | No  | NA | 1    | 1  | Low-quality    | Genome-fragment | NA              | 3.6   |
| 57_vs_110701[full]        | 5729  | No  | NA | 3    | 0  | Low-quality    | Genome-fragment | NA              | 3.66  |
| 515_extracted_27345       | 5731  | No  | NA | 0    | 0  | Not-determined | Genome-fragment | NA              | 14.03 |
| 54_extracted_21586        | 4178  | No  | NA | 0    | 1  | Not-determined | Genome-fragment | NA              | 0     |
| 54_extracted_21744        | 20906 | No  | NA | 0    | 8  | Not-determined | Genome-fragment | NA              | 0     |
| 54_extracted_21762        | 3113  | No  | NA | 0    | 2  | Not-determined | Genome-fragment | NA              | 0     |
| 54_extracted_21768        | 1783  | No  | NA | 0    | 0  | Not-determined | Genome-fragment | NA              | 0     |
| 58_extracted_k141_63886   | 5732  | No  | NA | 0    | 0  | Low-quality    | Genome-fragment | NA              | 15.3  |
| 55_vs_k141_94328[full]    | 5738  | No  | NA | 1    | 0  | Low-quality    | Genome-fragment | NA              | 11.39 |
| 56_vs_k141_61579[full]    | 5741  | No  | NA | 0    | 0  | Low-quality    | Genome-fragment | NA              | 3.64  |
| 510_vs_50469[full]        | 5742  | Yes | NA | 3124 | 1  | 3              | Low-quality     | Genome-fragment | 1.96  |
| 54_extracted_22153        | 1099  | No  | NA | 0    | 1  | Not-determined |                 |                 |       |



|                                      |        |     |    |      |   |                |                 |       |       |
|--------------------------------------|--------|-----|----|------|---|----------------|-----------------|-------|-------|
| 54_extracted_23576                   | 12765  | No  | NA | 0    | 7 | Not-determined | Genome-fragment | NA    | 0     |
| 54_extracted_23657                   | 2096   | No  | NA | 0    | 1 | Not-determined | Genome-fragment | NA    | 0     |
| 54_extracted_23691                   | 1161   | No  | NA | 0    | 1 | Not-determined | Genome-fragment | NA    | 0     |
| 51_extracted_k141_26096              | 5750   | No  | NA | 0    | 0 | Low-quality    | Genome-fragment | 4.15  | 0     |
| 56_extracted_k141_10561              | 5751   | No  | NA | 4    | 0 | Low-quality    | Genome-fragment | 9.51  | 0     |
| 56_vs_k141_15183  full               | 5751   | No  | NA | 0    | 0 | Low-quality    | Genome-fragment | 4.2   | 0     |
| 516_vs_160733  full                  | 5752   | No  | NA | 1    | 0 | Low-quality    | Genome-fragment | 7.02  | 0     |
| 512_vs_k141_161472  full             | 5755   | No  | NA | 0    | 2 | Low-quality    | Genome-fragment | 13.06 | 0     |
| 59_vs_k141_12161  full               | 5759   | No  | NA | 0    | 0 | Low-quality    | Genome-fragment | 14.68 | 0     |
| 54_extracted_24145                   | 1221   | No  | NA | 0    | 1 | Not-determined | Genome-fragment | NA    | 0     |
| 57_vs_114308  full                   | 5760   | No  | NA | 2    | 0 | Low-quality    | Genome-fragment | 15.41 | 0     |
| 54_extracted_24283                   | 1046   | No  | NA | 0    | 1 | Not-determined | Genome-fragment | NA    | 0     |
| 54_extracted_24286                   | 3231   | No  | NA | 0    | 0 | Not-determined | Genome-fragment | NA    | 0     |
| 54_extracted_24329                   | 2000   | No  | NA | 0    | 1 | Not-determined | Genome-fragment | NA    | 0     |
| 54_extracted_24335                   | 1098   | No  | NA | 0    | 2 | Not-determined | Genome-fragment | NA    | 0     |
| 54_extracted_24380                   | 1554   | No  | NA | 0    | 0 | Not-determined | Genome-fragment | NA    | 0     |
| 54_extracted_24408                   | 1007   | No  | NA | 0    | 2 | Not-determined | Genome-fragment | NA    | 0     |
| 511_vs_k141_96979  full              | 5761   | No  | NA | 2    | 0 | Low-quality    | Genome-fragment | 3.93  | 0     |
| 54_extracted_24445                   | 1102   | No  | NA | 0    | 0 | Not-determined | Genome-fragment | NA    | 0     |
| 512_vs_k141_4004  full               | 5761   | No  | NA | 2    | 1 | Low-quality    | Genome-fragment | 9.74  | 0     |
| 510_vs_103285  full                  | 5764   | No  | NA | 1    | 0 | Low-quality    | Genome-fragment | 15.38 | 0     |
| 54_extracted_24572                   | 1980   | No  | NA | 0    | 1 | Not-determined | Genome-fragment | NA    | 0     |
| 54_extracted_25009                   | 1043   | No  | NA | 0    | 0 | Not-determined | Genome-fragment | NA    | 0     |
| 517_vs_k141_93978  full              | 5767   | No  | NA | 5    | 0 | Low-quality    | Genome-fragment | 14.12 | 0     |
| 54_extracted_25092                   | 4178   | No  | NA | 0    | 4 | Not-determined | Genome-fragment | NA    | 0     |
| 514_extracted_k141_44049             | 5769   | No  | NA | 3    | 0 | Low-quality    | Genome-fragment | 9.89  | 0     |
| 58_vs_k141_198181  full              | 5769   | No  | NA | 0    | 4 | Low-quality    | Genome-fragment | 18.42 | 0     |
| 517_extracted_k141_76836             | 5771   | No  | NA | 0    | 2 | Low-quality    | Genome-fragment | 0.94  | 0     |
| 54_extracted_25104                   | 2517   | No  | NA | 0    | 0 | Not-determined | Genome-fragment | NA    | 0     |
| 54_extracted_25491                   | 3147   | No  | NA | 0    | 1 | Not-determined | Genome-fragment | NA    | 0     |
| 58_vs_k141_80836  full               | 5772   | No  | NA | 0    | 4 | Low-quality    | Genome-fragment | 1.66  | 0     |
| 54_extracted_25575                   | 1580   | No  | NA | 1    | 1 | Not-determined | Genome-fragment | NA    | 0     |
| 516_vs_16070  full                   | 5773   | No  | NA | 2    | 0 | Low-quality    | Genome-fragment | 27.39 | 0     |
| 54_extracted_26026                   | 1543   | No  | NA | 0    | 0 | Not-determined | Genome-fragment | NA    | 0     |
| 54_extracted_26027                   | 1438   | No  | NA | 0    | 0 | Not-determined | Genome-fragment | NA    | 0     |
| 54_extracted_26065                   | 3670   | No  | NA | 0    | 2 | Not-determined | Genome-fragment | NA    | 0     |
| 514_vs_k141_44755  full              | 5774   | No  | NA | 3    | 0 | Low-quality    | Genome-fragment | 14.83 | 0     |
| 54_extracted_26208                   | 1037   | No  | NA | 0    | 1 | Not-determined | Genome-fragment | NA    | 0     |
| 54_extracted_k141_36789              | 5775   | No  | NA | 2    | 2 | Low-quality    | Genome-fragment | 5.71  | 0     |
| 54_extracted_26353                   | 1056   | No  | NA | 0    | 1 | Not-determined | Genome-fragment | NA    | 0     |
| 513_extracted_59201                  | 5776   | No  | NA | 1    | 1 | Low-quality    | Genome-fragment | 8.26  | 27.3  |
| 54_extracted_26417                   | 8382   | No  | NA | 9    | 0 | High-quality   | Genome-fragment | 99.57 | 0     |
| 54_extracted_26472                   | 6555   | No  | NA | 0    | 3 | Not-determined | Genome-fragment | NA    | 0     |
| 517_vs_k141_157485  full             | 5777   | No  | NA | 0    | 1 | Low-quality    | Genome-fragment | 5.52  | 0     |
| 54_extracted_26533                   | 12406  | No  | NA | 0    | 1 | Not-determined | Genome-fragment | NA    | 0     |
| 55_vs_k141_59312  full               | 5777   | Yes | NA | 5092 | 1 | Low-quality    | Genome-fragment | 13.73 | 11.86 |
| 516_extracted_122713                 | 5779   | No  | NA | 0    | 2 | Low-quality    | Genome-fragment | 3.45  | 0     |
| 54_extracted_26686                   | 12981  | No  | NA | 0    | 2 | Not-determined | Genome-fragment | NA    | 0     |
| 54_extracted_26717                   | 2593   | No  | NA | 0    | 0 | Not-determined | Genome-fragment | NA    | 0     |
| 53_extracted_k141_15778              | 5782   | Yes | NA | 2954 | 2 | Low-quality    | Genome-fragment | 7.39  | 48.91 |
| 54_extracted_26854                   | 1241   | No  | NA | 0    | 3 | Not-determined | Genome-fragment | NA    | 0     |
| 58_extracted_k141_78283              | 5782   | No  | NA | 0    | 0 | Low-quality    | Genome-fragment | 9.32  | 0     |
| 54_extracted_26907                   | 2951   | No  | NA | 0    | 0 | Not-determined | Genome-fragment | NA    | 0     |
| 57_vs_102067  full                   | 5783   | No  | NA | 7    | 0 | Low-quality    | Genome-fragment | 6.72  | 0     |
| 51_extracted_k141_22244              | 5784   | No  | NA | 4    | 1 | Low-quality    | Genome-fragment | 10.11 | 0     |
| 514_extracted_k141_74728             | 5788   | No  | NA | 7    | 0 | Low-quality    | Genome-fragment | 19.09 | 0     |
| 54_extracted_27861                   | 87384  | No  | NA | 15   | 2 | High-quality   | High-quality    | 100   | 0     |
| 517_extracted_k141_62733             | 5789   | No  | NA | 0    | 3 | Low-quality    | Genome-fragment | 1.87  | 0     |
| 54_extracted_28072                   | 1098   | No  | NA | 0    | 0 | Not-determined | Genome-fragment | NA    | 0     |
| 54_extracted_28126                   | 3268   | No  | NA | 0    | 3 | Not-determined | Genome-fragment | NA    | 0     |
| 55_vs_k141_115448  full              | 5789   | No  | NA | 6    | 1 | Low-quality    | Genome-fragment | 15.06 | 0     |
| 54_extracted_28429                   | 1589   | No  | NA | 0    | 0 | Not-determined | Genome-fragment | NA    | 0     |
| 54_extracted_28601                   | 38342  | No  | NA | 22   | 1 | High-quality   | High-quality    | 100   | 0     |
| 512_vs_k141_901  full                | 5789   | No  | NA | 0    | 0 | Low-quality    | Genome-fragment | 6.05  | 0     |
| 54_extracted_28710                   | 38383  | No  | NA | 0    | 4 | Not-determined | Genome-fragment | NA    | 0     |
| 54_extracted_28737                   | 1571   | No  | NA | 0    | 0 | Not-determined | Genome-fragment | NA    | 0     |
| 58_vs_k141_94034  full               | 5789   | No  | NA | 0    | 4 | Low-quality    | Genome-fragment | 5.34  | 0     |
| 512_extracted_k141_13262             | 5790   | No  | NA | 2    | 0 | Low-quality    | Genome-fragment | 9.99  | 0     |
| 54_extracted_28900                   | 1630   | No  | NA | 0    | 1 | Not-determined | Genome-fragment | NA    | 0     |
| 54_extracted_28930                   | 1055   | No  | NA | 0    | 0 | Not-determined | Genome-fragment | NA    | 0     |
| 517_extracted_k141_43614             | 5792   | No  | NA | 0    | 2 | Low-quality    | Genome-fragment | 0.5   | 0     |
| 54_extracted_29066                   | 1134   | No  | NA | 0    | 0 | Not-determined | Genome-fragment | NA    | 0     |
| 514_extracted_k141_34676             | 5792   | No  | NA | 0    | 1 | Low-quality    | Genome-fragment | 10.63 | 0     |
| 55_vs_k141_144059  full              | 5793   | No  | NA | 8    | 0 | Low-quality    | Genome-fragment | 11.19 | 0     |
| 54_extracted_29380                   | 3357   | No  | NA | 3    | 1 | Not-determined | Genome-fragment | NA    | 0     |
| 516_vs_140522  full                  | 5793   | No  | NA | 1    | 0 | Low-quality    | Genome-fragment | 7.56  | 0     |
| 54_extracted_29507                   | 8608   | No  | NA | 0    | 3 | Not-determined | Genome-fragment | NA    | 0     |
| 54_extracted_29537                   | 1031   | No  | NA | 0    | 1 | Not-determined | Genome-fragment | NA    | 0     |
| 54_extracted_29770                   | 1011   | No  | NA | 0    | 0 | Not-determined | Genome-fragment | NA    | 0     |
| 516_vs_33726  full                   | 5799   | No  | NA | 0    | 0 | Low-quality    | Genome-fragment | 7.04  | 0     |
| 54_extracted_29964                   | 8011   | No  | NA | 0    | 2 | Not-determined | Genome-fragment | NA    | 0     |
| 54_extracted_30103                   | 15716  | No  | NA | 0    | 0 | Medium-quality | Genome-fragment | 52.71 | 0     |
| 54_extracted_30153                   | 2494   | No  | NA | 0    | 1 | Not-determined | Genome-fragment | NA    | 0     |
| 54_extracted_30177                   | 1610   | No  | NA | 0    | 2 | Not-determined | Genome-fragment | NA    | 0     |
| 516_vs_160975  full                  | 5799   | No  | NA | 4    | 0 | Low-quality    | Genome-fragment | 3.94  | 0     |
| 53_extracted_k141_43032              | 5800   | No  | NA | 2    | 0 | Low-quality    | Genome-fragment | 4.88  | 0     |
| 54_extracted_3252                    | 5805   | No  | NA | 8    | 0 | Low-quality    | Genome-fragment | 19.13 | 0     |
| 55_vs_k141_26522  full               | 5807   | No  | NA | 0    | 0 | Low-quality    | Genome-fragment | 3.48  | 0     |
| 54_extracted_30619                   | 4507   | No  | NA | 0    | 0 | Not-determined | Genome-fragment | NA    | 0     |
| 55_extracted_k141_97018              | 5808   | No  | NA | 4    | 0 | Low-quality    | Genome-fragment | 13.91 | 0     |
| 54_extracted_30700                   | 3331   | No  | NA | 0    | 4 | Not-determined | Genome-fragment | NA    | 0     |
| 517_vs_k141_146268  full             | 5809   | No  | NA | 0    | 2 | Low-quality    | Genome-fragment | 2.72  | 0     |
| 54_extracted_30824                   | 1232   | No  | NA | 0    | 0 | Not-determined | Genome-fragment | NA    | 0     |
| 51_vs_k141_124148  full              | 5809   | No  | NA | 0    | 3 | Low-quality    | Genome-fragment | 1.82  | 0     |
| 54_extracted_30851                   | 1167   | No  | NA | 1    | 1 | Not-determined | Genome-fragment | NA    | 0     |
| 57_extracted_16161                   | 5811   | No  | NA | 1    | 0 | Low-quality    | Genome-fragment | 10.98 | 0     |
| 58_vs_k141_61776  full               | 5813   | No  | NA | 1    | 2 | Low-quality    | Genome-fragment | 8.8   | 0     |
| 55_vs_k141_12987  full               | 5814   | No  | NA | 1    | 0 | Low-quality    | Genome-fragment | 9.49  | 0     |
| 510_vs_35904  full                   | 5815   | No  | NA | 1    | 1 | Low-quality    | Genome-fragment | 11.4  | 0     |
| 512_vs_k141_101552  full             | 5820   | No  | NA | 0    | 0 | Low-quality    | Genome-fragment | 10.45 | 0     |
| 54_extracted_31359                   | 1331   | No  | NA | 0    | 3 | Not-determined | Genome-fragment | NA    | 0     |
| 56_extracted_k141_27142              | 5821   | No  | NA | 0    | 1 | Low-quality    | Genome-fragment | 12.37 | 0     |
| 59_extracted_k141_64310              | 5826   | No  | NA | 2    | 0 | Low-quality    | Genome-fragment | 2.62  | 0     |
| 54_extracted_31568                   | 1127   | No  | NA | 0    | 1 | Not-determined | Genome-fragment | NA    | 0     |
| 54_extracted_31625                   | 6270   | No  | NA | 0    | 0 | Not-determined | Genome-fragment | NA    | 0     |
| 54_extracted_31682                   | 37597  | No  | NA | 22   | 0 | Complete       | High-quality    | 100   | 0     |
| 53_extracted_k141_55170              | 5826   | No  | NA | 0    | 1 | Low-quality    | Genome-fragment | 12.52 | 0     |
| 54_extracted_31825                   | 98149  | No  | NA | 14   | 1 | Complete       | High-quality    | 100   | 0     |
| 54_extracted_31841                   | 13611  | No  | NA | 0    | 4 | Not-determined | Genome-fragment | NA    | 0     |
| 54_extracted_31929                   | 4879   | No  | NA | 0    | 5 | Not-determined | Genome-fragment | NA    | 0     |
| 54_extracted_31933                   | 5510   | No  | NA | 0    | 2 | Not-determined | Genome-fragment | NA    | 0     |
| 54_extracted_31973                   | 118464 | No  | NA | 30   | 2 | Complete       | High-quality    | 100   | 0     |
| 54_extracted_31978                   | 56513  | No  | NA | 20   | 1 | Complete       | High-quality    | 100   | 0     |
| 54_extracted_31979                   | 42371  | No  | NA | 17   | 0 | Complete       | High-quality    | 100   | 0     |
| 54_extracted_31981                   | 51582  | No  | NA | 10   | 1 | Complete       | High-quality    | 100   | 0     |
| 54_extracted_31982                   | 33157  | No  | NA | 23   | 0 | Complete       | High-quality    | 100   | 0     |
| 514_extracted_k141_5593              | 5830   | No  | NA | 0    | 3 | Low-quality    | Genome-fragment | 20.21 | 0     |
| 54_vs_VIRSorter_31975-circular-cat_1 | 69179  | No  | NA | 15   | 5 | Medium-quality | Genome-fragment | 88.2  | 0     |
| 54_vs_VIRSorter_3022-circular-cat_1  | 43563  | No  | NA | 10   | 0 | High-quality   | High-quality    | 96.49 | 0     |
| 54_vs_VIRSorter_31916-circular-cat_1 | 41577  | No  | NA | 19   | 1 | High-quality   | High-quality    | 100   | 0     |
| 54_vs_VIRSorter_3006-cat_1           | 62793  | No  | NA | 35   | 2 | High-quality   | High-quality    | 100   | 0     |
| 54_vs_VIRSorter_3913-cat_1           | 25002  | No  | NA | 9    | 0 | Medium-quality | Genome-fragment | 55.31 | 0     |
| 58_vs_k141_145905  full              | 5831   | No  | NA | 4    | 0 | Low-quality    | Genome-fragment | 9.32  | 0     |
| 512_vs_k141_11222  full              | 5833   | No  | NA | 1    | 0 | Low-quality    | Genome-fragment | 31.67 | 0     |
| 513_vs_24210  full                   | 5837   | Yes | NA | 4167 | 1 | Low-quality    | Genome-fragment | 6.31  | 28.61 |
| 515_extracted_50876                  | 5839   | No  | NA | 1    | 0 | Low-quality    | Genome-fragment | 6.14  | 0     |
| 53_extracted_k141_12593              | 5840   | No  | NA | 1    | 0 | Low-quality    | Genome-fragment | 3.85  | 0     |
| 511_vs_k141_68133  full              | 5849   | No  | NA | 0    | 1 | Low-quality    | Genome-fragment | 13.17 | 0     |
| 54_vs_VIRSorter_11813-circular-cat_2 | 37678  | No  | NA | 13   | 3 | High-quality   | High-quality    | 100   | 0     |
| 54_vs_VIRSorter_31196-circular-cat_2 | 44132  | No  | NA | 14   | 0 | High-quality   | High-quality    | 99.71 | 0     |
| 54_vs_VIRSorter_31560-circular-cat_2 | 48517  | No  | NA | 21   | 1 | High-quality   | High-quality    | 100   | 0     |
| 54_vs_VIRSorter_31977-circular-cat_2 | 39384  | No  | NA | 19   | 0 | High-quality   | High-quality    | 95.55 | 0     |
| 54_vs_VIRSorter_7386-circular-cat_2  | 44589  | No  | NA | 16   | 1 | High-quality   | High-quality    | 99.34 | 0     |
| 54_vs_VIRSorter_31171-circular-cat_2 | 30681  | No  | NA | 15   | 0 | Medium-quality | Genome-fragment | 89.39 | 0     |
| 54_vs_VIRSorter_31972-circular-cat_2 | 37842  | No  | NA | 19   | 0 | High-quality   | High-quality    | 100   | 0     |
| 54_vs_VIRSorter_31976-circular-cat_2 | 58467  | No  | NA | 18   | 1 | High-quality   | High-quality    | 97.59 | 0     |
| 54_vs_VIRSorter_31980-circular-cat_2 | 42928  | No  | NA | 23   | 0 | High-quality   | High-quality    | 93.59 | 0     |
| 54_vs_VIRSorter_33190-cat_2          | 99394  | No  | NA | 11   | 2 | Medium-quality | Genome-fragment | 65.21 | 0     |
| 54_vs_VIRSorter_30222-cat_2          | 87349  | No  | NA | 38   | 1 | High-quality   | High-quality    | 100   | 0     |
| 54_vs_VIRSorter_27316-cat_2          | 69191  | No  | NA | 41   | 3 | High-quality   | High-quality    | 100   | 0     |
| 54_vs_VIRSorter_4839-cat_2           | 61401  | No  | NA | 30   | 1 | High-quality   | High-quality    | 98.93 | 0     |
| 54_vs_VIRSorter_3622-cat_2           | 43660  | No  | NA | 18   | 0 | High-quality   | High-quality    | 92.4  | 0     |
| 54_vs_VIRSorter_15837-cat_2          | 42134  | No  | NA | 30   | 0 | High-quality   | High-quality    | 97.63 | 0     |
| 54_vs_VIRSorter_16493-cat_2          | 40455  | No  | NA | 19   | 0 | High-quality   | High-quality    | 99.66 | 0     |
| 54_vs_VIRSorter_21643-cat_2          | 39545  | No  | NA | 25   | 0 | High-quality</ |                 |       |       |



|                           |          |      |     |   |                |                 |       |       |
|---------------------------|----------|------|-----|---|----------------|-----------------|-------|-------|
| 58_vs_k141_61253  full    | 5893 No  | NA   | 1   | 0 | Low-quality    | Genome-fragment | 7.51  | 0     |
| 56_extracted_k141_37703   | 3517 No  | NA   | 1   | 0 | Not-determined | Genome-fragment | NA    | 0     |
| 53_vs_k141_102322  full   | 5894 No  | NA   | 4   | 0 | Low-quality    | Genome-fragment | 16.87 | 0     |
| 56_extracted_k141_18872   | 1171 No  | NA   | 0   | 2 | Not-determined | Genome-fragment | NA    | 0     |
| 56_extracted_k141_16527   | 1203 No  | NA   | 0   | 3 | Not-determined | Genome-fragment | NA    | 0     |
| 56_extracted_k141_44786   | 1264 No  | NA   | 0   | 0 | Not-determined | Genome-fragment | NA    | 0     |
| 56_extracted_k141_33017   | 1066 No  | NA   | 0   | 2 | Not-determined | Genome-fragment | NA    | 0     |
| 516_extracted_118214      | 5895 No  | NA   | 1   | 0 | Low-quality    | Genome-fragment | 10.16 | 0     |
| 56_extracted_k141_49513   | 2045 No  | NA   | 0   | 2 | Not-determined | Genome-fragment | NA    | 0     |
| 516_vs_k141_144376  full  | 5895 No  | NA   | 5   | 0 | Low-quality    | Genome-fragment | 16.8  | 0     |
| 56_extracted_k141_47166   | 3360 No  | NA   | 0   | 2 | Not-determined | Genome-fragment | NA    | 0     |
| 510_vs_106735  full       | 5895 No  | NA   | 0   | 0 | Low-quality    | Genome-fragment | 7.5   | 0     |
| 56_extracted_k141_47170   | 1053 No  | NA   | 4   | 0 | Not-determined | Genome-fragment | NA    | 0     |
| 56_extracted_k141_47172   | 1306 No  | NA   | 0   | 0 | Not-determined | Genome-fragment | NA    | 0     |
| 56_extracted_k141_30673   | 1218 No  | NA   | 0   | 2 | Not-determined | Genome-fragment | NA    | 0     |
| 56_extracted_k141_45544   | 1118 No  | NA   | 0   | 0 | Not-determined | Genome-fragment | NA    | 0     |
| 56_extracted_k141_54238   | 1048 No  | NA   | 0   | 0 | Not-determined | Genome-fragment | NA    | 0     |
| 56_extracted_k141_30688   | 1682 No  | NA   | 0   | 1 | Not-determined | Genome-fragment | NA    | 0     |
| 56_extracted_k141_42509   | 1851 No  | NA   | 0   | 0 | Not-determined | Genome-fragment | NA    | 0     |
| 56_extracted_k141_28305   | 1136 No  | NA   | 0   | 0 | Not-determined | Genome-fragment | NA    | 0     |
| 56_extracted_k141_42532   | 2471 No  | NA   | 0   | 2 | Not-determined | Genome-fragment | NA    | 0     |
| 53_extracted_k141_113350  | 5898 No  | NA   | 3   | 0 | Low-quality    | Genome-fragment | 15.12 | 0     |
| 56_extracted_k141_33079   | 2438 No  | NA   | 0   | 0 | Not-determined | Genome-fragment | NA    | 0     |
| 510_vs_15287  full        | 5898 No  | NA   | 0   | 1 | Low-quality    | Genome-fragment | 10.95 | 0     |
| 514_vs_k141_87481  full   | 5899 No  | NA   | 4   | 0 | Low-quality    | Genome-fragment | 4.59  | 0     |
| 56_extracted_k141_16637   | 1074 No  | NA   | 0   | 1 | Not-determined | Genome-fragment | NA    | 0     |
| 56_extracted_k141_16641   | 1131 No  | NA   | 0   | 0 | Not-determined | Genome-fragment | NA    | 0     |
| 57_extracted_75453        | 5904 No  | NA   | 0   | 2 | Low-quality    | Genome-fragment | 2.94  | 0     |
| 53_extracted_k141_89817   | 5906 No  | NA   | 0   | 0 | Low-quality    | Genome-fragment | 4.42  | 0     |
| 517_vs_k141_68587  full   | 5907 No  | NA   | 0   | 0 | Low-quality    | Genome-fragment | 9.32  | 0     |
| 56_extracted_k141_49621   | 3291 No  | NA   | 0   | 0 | Not-determined | Genome-fragment | NA    | 0     |
| 56_extracted_k141_3915    | 3915 No  | NA   | 0   | 0 | Not-determined | Genome-fragment | NA    | 0     |
| 56_extracted_k141_44894   | 1337 No  | NA   | 0   | 0 | Not-determined | Genome-fragment | NA    | 0     |
| 57_vs_93715  full         | 5911 No  | NA   | 4   | 0 | Low-quality    | Genome-fragment | 12.58 | 0     |
| 56_extracted_k141_28414   | 1157 No  | NA   | 0   | 0 | Not-determined | Genome-fragment | NA    | 0     |
| 56_extracted_k141_49629   | 1260 No  | NA   | 0   | 0 | Not-determined | Genome-fragment | NA    | 0     |
| 56_extracted_k141_42635   | 3666 No  | NA   | 0   | 1 | Not-determined | Genome-fragment | NA    | 0     |
| 56_extracted_k141_14320   | 1383 No  | NA   | 0   | 2 | Not-determined | Genome-fragment | NA    | 0     |
| 56_extracted_k141_44926   | 1073 No  | NA   | 0   | 1 | Not-determined | Genome-fragment | NA    | 0     |
| 58_vs_k141_129737  full   | 5912 No  | NA   | 0   | 4 | Low-quality    | Genome-fragment | 2.75  | 0     |
| 56_extracted_k141_230     | 4269 No  | NA   | 0   | 1 | Not-determined | Genome-fragment | NA    | 0     |
| 516_vs_63890  full        | 5914 No  | NA   | 0   | 0 | Low-quality    | Genome-fragment | 7.66  | 0     |
| 56_extracted_k141_235     | 1750 No  | NA   | 0   | 0 | Not-determined | Genome-fragment | NA    | 0     |
| 56_extracted_k141_44954   | 2478 No  | NA   | 0   | 3 | Not-determined | Genome-fragment | NA    | 0     |
| 56_extracted_k141_252     | 1018 No  | NA   | 0   | 0 | Not-determined | Genome-fragment | NA    | 0     |
| 56_extracted_k141_31220   | 1425 No  | NA   | 0   | 1 | Not-determined | Genome-fragment | NA    | 0     |
| 56_extracted_k141_16699   | 1053 No  | NA   | 0   | 0 | Not-determined | Genome-fragment | NA    | 0     |
| 56_extracted_k141_31204   | 2151 No  | NA   | 0   | 4 | Not-determined | Genome-fragment | NA    | 0     |
| 56_extracted_k141_26045   | 1640 No  | NA   | 0   | 0 | Not-determined | Genome-fragment | NA    | 0     |
| 52_extracted_k141_8899    | 5914 No  | NA   | 8   | 0 | Low-quality    | Genome-fragment | 14.52 | 0     |
| 56_extracted_k141_4848    | 5478 No  | NA   | 0   | 0 | Not-determined | Genome-fragment | NA    | 0     |
| 512_vs_k141_182218  full  | 5915 No  | NA   | 0   | 0 | Low-quality    | Genome-fragment | 14.69 | 0     |
| 56_extracted_k141_306     | 1184 No  | NA   | 0   | 1 | Not-determined | Genome-fragment | NA    | 0     |
| 56_extracted_k141_40241   | 1603 No  | NA   | 0   | 1 | Not-determined | Genome-fragment | NA    | 0     |
| 56_extracted_k141_2514    | 1021 No  | NA   | 0   | 1 | Not-determined | Genome-fragment | NA    | 0     |
| 56_extracted_k141_40020   | 3304 No  | NA   | 0   | 0 | Not-determined | Genome-fragment | NA    | 0     |
| 56_extracted_k141_26098   | 1664 No  | NA   | 0   | 0 | Not-determined | Genome-fragment | NA    | 0     |
| 56_extracted_k141_7191    | 1361 No  | NA   | 0   | 0 | Not-determined | Genome-fragment | NA    | 0     |
| 56_extracted_k141_376     | 1943 No  | NA   | 0   | 1 | Not-determined | Genome-fragment | NA    | 0     |
| 56_extracted_k141_52138   | 2147 No  | NA   | 0   | 0 | Not-determined | Genome-fragment | NA    | 0     |
| 56_extracted_k141_33283   | 5785 No  | NA   | 0   | 5 | Not-determined | Genome-fragment | NA    | 0     |
| 56_extracted_k141_45042   | 1804 No  | NA   | 0   | 3 | Not-determined | Genome-fragment | NA    | 0     |
| 514_vs_k141_55569  full   | 5916 No  | NA   | 4   | 0 | Low-quality    | Genome-fragment | 6.1   | 0     |
| 56_extracted_k141_33296   | 1479 No  | NA   | 0   | 0 | Not-determined | Genome-fragment | NA    | 0     |
| 51_vs_k141_14611  full    | 5916 No  | NA   | 1   | 1 | Low-quality    | Genome-fragment | 13.69 | 0     |
| 56_extracted_k141_2640    | 1415 No  | NA   | 0   | 0 | Not-determined | Genome-fragment | NA    | 0     |
| 56_extracted_k141_16758   | 1492 No  | NA   | 0   | 1 | Not-determined | Genome-fragment | NA    | 0     |
| 56_extracted_k141_4896    | 2484 No  | NA   | 0   | 1 | Not-determined | Genome-fragment | NA    | 0     |
| 56_extracted_k141_45073   | 1388 No  | NA   | 0   | 1 | Not-determined | Genome-fragment | NA    | 0     |
| 56_extracted_k141_45077   | 1627 No  | NA   | 0   | 1 | Not-determined | Genome-fragment | NA    | 0     |
| 56_extracted_k141_38138   | 2470 No  | NA   | 0   | 1 | Not-determined | Genome-fragment | NA    | 0     |
| 56_extracted_k141_47738   | 12508 No | NA   | 5   | 0 | High-quality   | Genome-fragment | 100   | 0     |
| 512_vs_k141_11280  full   | 5921 No  | NA   | 6   | 0 | Low-quality    | Genome-fragment | 9.87  | 0     |
| 516_vs_126993  full       | 5926 No  | NA   | 0   | 1 | Low-quality    | Genome-fragment | 10.64 | 0     |
| 58_vs_k141_21460  full    | 5928 No  | NA   | 5   | 0 | Low-quality    | Genome-fragment | 2.99  | 0     |
| 56_extracted_k141_2700    | 1834 No  | NA   | 0   | 1 | Not-determined | Genome-fragment | NA    | 0     |
| 56_extracted_k141_9648    | 2354 No  | NA   | 0   | 1 | Not-determined | Genome-fragment | NA    | 0     |
| 56_extracted_k141_16788   | 1370 No  | NA   | 0   | 1 | Not-determined | Genome-fragment | NA    | 0     |
| 56_extracted_k141_26122   | 1167 No  | NA   | 0   | 0 | Not-determined | Genome-fragment | NA    | 0     |
| 56_extracted_k141_26128   | 1255 No  | NA   | 0   | 3 | Not-determined | Genome-fragment | NA    | 0     |
| 56_extracted_k141_9681    | 1111 No  | NA   | 0   | 2 | Not-determined | Genome-fragment | NA    | 0     |
| 56_extracted_k141_31393   | 1641 No  | NA   | 0   | 2 | Not-determined | Genome-fragment | NA    | 0     |
| 56_extracted_k141_23842   | 1523 No  | NA   | 0   | 2 | Not-determined | Genome-fragment | NA    | 0     |
| 516_vs_42643  full        | 5930 Yes | NA   | 1   | 3 | Low-quality    | Genome-fragment | 0.49  | 85.53 |
| 56_extracted_k141_3692    | 1770 No  | NA   | 858 | 1 | Not-determined | Genome-fragment | NA    | 0     |
| 56_extracted_k141_38192   | 1152 No  | NA   | 0   | 0 | Not-determined | Genome-fragment | NA    | 0     |
| 517_extracted_k141_79290  | 5933 No  | NA   | 3   | 0 | Low-quality    | Genome-fragment | 13.26 | 0     |
| 56_extracted_k141_487     | 2882 No  | NA   | 0   | 0 | Not-determined | Genome-fragment | NA    | 0     |
| 53_vs_k141_58024  full    | 5933 No  | NA   | 0   | 0 | Low-quality    | Genome-fragment | 4.44  | 0     |
| 517_vs_k141_87629  full   | 5936 No  | NA   | 3   | 0 | Low-quality    | Genome-fragment | 14.65 | 0     |
| 56_extracted_k141_52229   | 2074 No  | NA   | 0   | 0 | Not-determined | Genome-fragment | NA    | 0     |
| 56_extracted_k141_47296   | 4423 No  | NA   | 0   | 0 | Not-determined | Genome-fragment | NA    | 0     |
| 56_extracted_k141_26146   | 3220 No  | NA   | 0   | 3 | Not-determined | Genome-fragment | NA    | 0     |
| 514_vs_k141_47751  full   | 5936 No  | NA   | 2   | 0 | Low-quality    | Genome-fragment | 4.02  | 0     |
| 517_extracted_k141_105335 | 5941 No  | NA   | 0   | 0 | Low-quality    | Genome-fragment | 19.58 | 0     |
| 56_extracted_k141_19031   | 1073 No  | NA   | 0   | 0 | Not-determined | Genome-fragment | NA    | 0     |
| 510_extracted_744         | 5943 No  | NA   | 1   | 1 | Low-quality    | Genome-fragment | 3.22  | 0     |
| 55_vs_k141_110620  full   | 5944 No  | NA   | 2   | 0 | Low-quality    | Genome-fragment | 3.5   | 0     |
| 56_extracted_k141_16858   | 3925 No  | NA   | 0   | 2 | Not-determined | Genome-fragment | NA    | 0     |
| 56_extracted_k141_52304   | 1074 No  | NA   | 0   | 1 | Not-determined | Genome-fragment | NA    | 0     |
| 56_extracted_k141_42848   | 3413 No  | NA   | 0   | 3 | Not-determined | Genome-fragment | NA    | 0     |
| 56_extracted_k141_2875    | 1395 No  | NA   | 0   | 1 | Not-determined | Genome-fragment | NA    | 0     |
| 56_extracted_k141_7275    | 2273 No  | NA   | 0   | 3 | Not-determined | Genome-fragment | NA    | 0     |
| 56_extracted_k141_4960    | 3934 No  | NA   | 0   | 1 | Not-determined | Genome-fragment | NA    | 0     |
| 56_extracted_k141_47314   | 1087 No  | NA   | 0   | 1 | Not-determined | Genome-fragment | NA    | 0     |
| 512_vs_k141_13467  full   | 5944 Yes | 2398 | 2   | 1 | Low-quality    | Genome-fragment | 5.85  | 59.66 |
| 56_extracted_k141_19066   | 1093 No  | NA   | 0   | 1 | Not-determined | Genome-fragment | NA    | 0     |
| 56_extracted_k141_52410   | 1768 No  | NA   | 0   | 2 | Not-determined | Genome-fragment | NA    | 0     |
| 56_extracted_k141_11217   | 1521 No  | NA   | 0   | 0 | Not-determined | Genome-fragment | NA    | 0     |
| 56_extracted_k141_45179   | 1228 No  | NA   | 0   | 2 | Not-determined | Genome-fragment | NA    | 0     |
| 53_extracted_k141_15559   | 5947 No  | NA   | 2   | 0 | Low-quality    | Genome-fragment | 6.67  | 0     |
| 56_extracted_k141_544     | 1756 No  | NA   | 0   | 0 | Not-determined | Genome-fragment | NA    | 0     |
| 56_extracted_k141_7330    | 5279 No  | NA   | 0   | 3 | Not-determined | Genome-fragment | NA    | 0     |
| 56_extracted_k141_16923   | 2193 No  | NA   | 0   | 1 | Not-determined | Genome-fragment | NA    | 0     |
| 59_vs_k141_65757  full    | 5952 No  | NA   | 0   | 0 | Low-quality    | Genome-fragment | 3.32  | 0     |
| 56_extracted_k141_33488   | 1372 No  | NA   | 0   | 1 | Not-determined | Genome-fragment | NA    | 0     |
| 51_extracted_k141_65025   | 5954 No  | NA   | 4   | 0 | Low-quality    | Genome-fragment | 9.84  | 0     |
| 56_extracted_k141_12270   | 4446 No  | NA   | 0   | 2 | Not-determined | Genome-fragment | NA    | 0     |
| 56_extracted_k141_18664   | 1225 No  | NA   | 0   | 0 | Not-determined | Genome-fragment | NA    | 0     |
| 516_extracted_95382       | 5954 No  | NA   | 3   | 0 | Low-quality    | Genome-fragment | 9.12  | 0     |
| 56_extracted_k141_2990    | 2057 No  | NA   | 0   | 0 | Not-determined | Genome-fragment | NA    | 0     |
| 56_extracted_k141_47395   | 1317 No  | NA   | 0   | 1 | Not-determined | Genome-fragment | NA    | 0     |
| 56_extracted_k141_28708   | 10820 No | NA   | 0   | 4 | Not-determined | Genome-fragment | NA    | 0     |
| 56_extracted_k141_45228   | 15593 No | NA   | 7   | 0 | Medium-quality | Genome-fragment | 72.68 | 0     |
| 56_extracted_k141_28721   | 1149 No  | NA   | 0   | 0 | Not-determined | Genome-fragment | NA    | 0     |
| 56_extracted_k141_628     | 1679 No  | NA   | 0   | 0 | Not-determined | Genome-fragment | NA    | 0     |
| 56_extracted_k141_28722   | 1147 No  | NA   | 0   | 2 | Not-determined | Genome-fragment | NA    | 0     |
| 56_extracted_k141_53560   | 1185 No  | NA   | 0   | 1 | Not-determined | Genome-fragment | NA    | 0     |
| 511_vs_k141_57351  full   | 5958 No  | NA   | 0   | 0 | Low-quality    | Genome-fragment | 3.87  | 0     |
| 56_extracted_k141_3011    | 1415 No  | NA   | 0   | 2 | Not-determined | Genome-fragment | NA    | 0     |
| 56_extracted_k141_30881   | 1415 No  | NA   | 0   | 0 | Not-determined | Genome-fragment | NA    | 0     |
| 57_vs_108544  full        | 5958 No  | NA   | 1   | 0 | Low-quality    | Genome-fragment | 5.4   | 0     |
| 56_extracted_k141_54296   | 1152 No  | NA   | 0   | 0 | Not-determined | Genome-fragment | NA    | 0     |
| 56_extracted_k141_30888   | 1513 No  | NA   | 0   | 1 | Not-determined | Genome-fragment | NA    | 0     |
| 56_extracted_k141_40602   | 1197 No  | NA   | 0   | 0 | Not-determined | Genome-fragment | NA    | 0     |
| 56_extracted_k141_26292   | 8247 No  | NA   | 0   | 1 | Not-determined | Genome-fragment | NA    | 0     |
| 53_extracted_k141_16365   | 5962 No  | NA   | 7   | 0 | Low-quality    | Genome-fragment | 17.2  | 0     |
| 56_extracted_k141_16312   | 3012 No  | NA   | 0   | 3 | Not-determined | Genome-fragment | NA    | 0     |
| 56_extracted_k141_21399   | 5618 No  | NA   | 0   | 1 | Not-determined | Genome-fragment | NA    | 0     |
| 56_extracted_k141_30915   | 1397 No  | NA   | 0   | 1 | Not-determined | Genome-fragment | NA    | 0     |
| 56_extracted_k141_54319   | 1989 No  | NA   | 0   | 1 | Not-determined | Genome-fragment | NA    | 0     |
| 56_extracted_k141_3048    | 1169 No  | NA   | 0   | 2 | Not-determined | Genome-fragment | NA    | 0     |
| 56_extracted_k141_38309   | 1053 No  | NA   | 0   | 0 | Not-determined | Genome-fragment | NA    | 0     |
| 56_extracted_k141_28756   | 1110 No  | NA   | 0   | 1 | Not-determined | Genome-fragment | NA    | 0     |
| 58_vs_k141_194138  full   | 5964 Yes | 4862 | 1   | 1 | Low-quality    | Genome-fragment | 10.17 | 18.48 |
| 56_extracted_k141_24103   | 1004 No  | NA   | 0   | 1 | Not-determined | Genome-fragment | NA    | 0     |
| 56_extracted_k141_38337   | 2125 No  | NA   | 0   | 3 | Not-determined | Genome-fragment | NA    | 0     |
| 56_extracted_k141_38342   | 1603 No  | NA   | 0   | 2 | Not-determined | Genome-fragment | NA    | 0     |
| 56_extracted_k141_9893    | 1236 No  | NA   | 0   | 1 | Not-determined | Genome-fragment | NA    | 0     |
| 56_extracted_k141_12448   | 1061 No  | NA   | 0   | 1 | Not-determined | Genome-fragment | NA    | 0     |
| 52_extracted_k141_824     | 5965 No  | NA   | 3   | 0 | Low-quality    | Genome-fragment | 21.04 | 0     |
| 53_extracted_k141_51814   | 5967 No  | NA   |     |   |                |                 |       |       |



|                            |       |     |      |    |   |                |                 |       |       |
|----------------------------|-------|-----|------|----|---|----------------|-----------------|-------|-------|
| 56_extracted_k141_7542     | 4023  | No  | NA   | 0  | 1 | Not-determined | Genome-fragment | NA    | 0     |
| 56_extracted_k141_24299    | 3791  | No  | NA   | 0  | 1 | Not-determined | Genome-fragment | NA    | 0     |
| 511_vs_k141_39795  full    | 5981  | No  | NA   | 0  | 0 | Low-quality    | Genome-fragment | 3.67  | 0     |
| 56_extracted_k141_24303    | 1089  | No  | NA   | 0  | 1 | Not-determined | Genome-fragment | NA    | 0     |
| 56_extracted_k141_38404    | 1036  | No  | NA   | 0  | 1 | Not-determined | Genome-fragment | NA    | 0     |
| 56_extracted_k141_45434    | 2611  | No  | NA   | 0  | 2 | Not-determined | Genome-fragment | NA    | 0     |
| 56_extracted_k141_35894    | 1019  | No  | NA   | 0  | 1 | Not-determined | Genome-fragment | NA    | 0     |
| 56_extracted_k141_50028    | 1536  | No  | NA   | 0  | 1 | Not-determined | Genome-fragment | NA    | 0     |
| 57_vs_89580  full          | 5981  | No  | NA   | 0  | 0 | Low-quality    | Genome-fragment | 14.61 | 0     |
| 56_extracted_k141_24320    | 3103  | No  | NA   | 0  | 1 | Not-determined | Genome-fragment | NA    | 0     |
| 56_extracted_k141_5212     | 1219  | No  | NA   | 0  | 1 | Not-determined | Genome-fragment | NA    | 0     |
| 56_extracted_k141_9993     | 2559  | No  | NA   | 0  | 1 | Not-determined | Genome-fragment | NA    | 0     |
| 56_extracted_k141_35943    | 1154  | No  | NA   | 0  | 0 | Not-determined | Genome-fragment | NA    | 0     |
| 56_extracted_k141_7585     | 1902  | No  | NA   | 0  | 0 | Not-determined | Genome-fragment | NA    | 0     |
| 51_extracted_k141_106234   | 5984  | No  | NA   | 0  | 2 | Low-quality    | Genome-fragment | 3.38  | 0     |
| 56_extracted_k141_47625    | 1007  | No  | NA   | 0  | 0 | Not-determined | Genome-fragment | NA    | 0     |
| 54_vs_VIRSorter_29122-ca_2 | 5986  | No  | NA   | 2  | 0 | Low-quality    | Genome-fragment | 6.85  | 0     |
| 56_extracted_k141_31131    | 2008  | No  | NA   | 0  | 1 | Not-determined | Genome-fragment | NA    | 0     |
| 56_extracted_k141_43077    | 2478  | No  | NA   | 0  | 2 | Not-determined | Genome-fragment | NA    | 0     |
| 517_extracted_k141_27809   | 5989  | No  | NA   | 2  | 0 | Low-quality    | Genome-fragment | 8.28  | 0     |
| 56_extracted_k141_35976    | 1146  | No  | NA   | 0  | 0 | Not-determined | Genome-fragment | NA    | 0     |
| 56_extracted_k141_43086    | 1113  | No  | NA   | 0  | 2 | Not-determined | Genome-fragment | NA    | 0     |
| 56_extracted_k141_47661    | 1626  | No  | NA   | 0  | 2 | Not-determined | Genome-fragment | NA    | 0     |
| 56_extracted_k141_31202    | 1314  | No  | NA   | 0  | 2 | Not-determined | Genome-fragment | NA    | 0     |
| 56_extracted_k141_5317     | 1100  | No  | NA   | 0  | 0 | Not-determined | Genome-fragment | NA    | 0     |
| 517_vs_k141_23850  full    | 5991  | Yes | 656  | 1  | 4 | Low-quality    | Genome-fragment | 0.45  | 89.05 |
| 58_extracted_k141_160095   | 5994  | No  | NA   | 1  | 0 | Low-quality    | Genome-fragment | 4.03  | 0     |
| 57_extracted_23873         | 5995  | No  | NA   | 0  | 0 | Low-quality    | Genome-fragment | 6.82  | 0     |
| 56_extracted_k141_47725    | 2125  | No  | NA   | 0  | 1 | Not-determined | Genome-fragment | NA    | 0     |
| 56_extracted_k141_33819    | 1040  | No  | NA   | 0  | 1 | Not-determined | Genome-fragment | NA    | 0     |
| 58_vs_k141_148924  full    | 5995  | No  | NA   | 5  | 0 | Low-quality    | Genome-fragment | 14.17 | 0     |
| 56_extracted_k141_33845    | 1049  | No  | NA   | 0  | 0 | Not-determined | Genome-fragment | NA    | 0     |
| 56_extracted_k141_17337    | 1581  | No  | NA   | 0  | 2 | Not-determined | Genome-fragment | NA    | 0     |
| 56_extracted_k141_45618    | 44283 | No  | NA   | 15 | 2 | Complete       | High-quality    | 100   | 0     |
| 56_extracted_k141_40796    | 1767  | No  | NA   | 0  | 0 | Not-determined | Genome-fragment | NA    | 0     |
| 56_extracted_k141_40804    | 1228  | No  | NA   | 0  | 1 | Not-determined | Genome-fragment | NA    | 0     |
| 56_extracted_k141_45624    | 6617  | No  | NA   | 0  | 2 | Not-determined | Genome-fragment | NA    | 0     |
| 56_extracted_k141_38485    | 1162  | No  | NA   | 0  | 1 | Not-determined | Genome-fragment | NA    | 0     |
| 56_extracted_k141_31389    | 1296  | No  | NA   | 0  | 2 | Not-determined | Genome-fragment | NA    | 0     |
| 56_extracted_k141_43093    | 3239  | No  | NA   | 0  | 6 | Not-determined | Genome-fragment | NA    | 0     |
| 56_extracted_k141_26482    | 1563  | No  | NA   | 0  | 1 | Not-determined | Genome-fragment | NA    | 0     |
| 56_extracted_k141_28992    | 1075  | No  | NA   | 0  | 2 | Not-determined | Genome-fragment | NA    | 0     |
| 58_vs_k141_150993  full    | 5995  | No  | NA   | 0  | 3 | Low-quality    | Genome-fragment | 8.5   | 0     |
| 56_extracted_k141_14882    | 1900  | No  | NA   | 0  | 2 | Not-determined | Genome-fragment | NA    | 0     |
| 56_extracted_k141_12738    | 1364  | No  | NA   | 0  | 0 | Not-determined | Genome-fragment | NA    | 0     |
| 56_extracted_k141_24553    | 16941 | No  | NA   | 0  | 2 | Medium-quality | Genome-fragment | 79.21 | 0     |
| 56_extracted_k141_45673    | 1036  | No  | NA   | 0  | 2 | Not-determined | Genome-fragment | NA    | 0     |
| 56_extracted_k141_52844    | 1105  | No  | NA   | 0  | 0 | Not-determined | Genome-fragment | NA    | 0     |
| 56_extracted_k141_33955    | 1007  | No  | NA   | 0  | 0 | Not-determined | Genome-fragment | NA    | 0     |
| 56_extracted_k141_24598    | 1261  | No  | NA   | 0  | 0 | Not-determined | Genome-fragment | NA    | 0     |
| 56_extracted_k141_7802     | 1126  | No  | NA   | 0  | 1 | Not-determined | Genome-fragment | NA    | 0     |
| 53_extracted_k141_76586    | 6002  | No  | NA   | 0  | 1 | Low-quality    | Genome-fragment | 4.74  | 0     |
| 56_extracted_k141_24602    | 1607  | No  | NA   | 0  | 0 | Not-determined | Genome-fragment | NA    | 0     |
| 53_extracted_k141_3969     | 6004  | No  | NA   | 0  | 0 | Low-quality    | Genome-fragment | 3.67  | 0     |
| 52_vs_k141_17044  full     | 6004  | No  | NA   | 5  | 0 | Low-quality    | Genome-fragment | 13.96 | 0     |
| 56_extracted_k141_36078    | 1714  | No  | NA   | 0  | 0 | Not-determined | Genome-fragment | NA    | 0     |
| 56_extracted_k141_19264    | 1811  | No  | NA   | 0  | 0 | Not-determined | Genome-fragment | NA    | 0     |
| 56_extracted_k141_30153    | 6005  | No  | NA   | 4  | 0 | Low-quality    | Genome-fragment | 13.24 | 0     |
| 56_extracted_k141_10267    | 1242  | No  | NA   | 0  | 0 | Not-determined | Genome-fragment | NA    | 0     |
| 56_extracted_k141_24665    | 1093  | No  | NA   | 0  | 1 | Not-determined | Genome-fragment | NA    | 0     |
| 56_extracted_k141_45809    | 1151  | No  | NA   | 0  | 0 | Not-determined | Genome-fragment | NA    | 0     |
| 56_vs_k141_17081  full     | 6006  | No  | NA   | 0  | 0 | Low-quality    | Genome-fragment | 16.25 | 0     |
| 56_extracted_k141_1002     | 1589  | No  | NA   | 0  | 1 | Not-determined | Genome-fragment | NA    | 0     |
| 56_extracted_k141_10277    | 1144  | No  | NA   | 0  | 0 | Not-determined | Genome-fragment | NA    | 0     |
| 56_extracted_k141_31372    | 1117  | No  | NA   | 0  | 0 | Not-determined | Genome-fragment | NA    | 0     |
| 56_extracted_k141_34030    | 1259  | No  | NA   | 0  | 0 | Not-determined | Genome-fragment | NA    | 0     |
| 56_extracted_k141_3435     | 12140 | No  | NA   | 14 | 0 | Medium-quality | Genome-fragment | 55.39 | 0     |
| 516_vs_75306  full         | 6011  | No  | NA   | 0  | 0 | Low-quality    | Genome-fragment | 9.62  | 0     |
| 56_extracted_k141_54176    | 1335  | No  | NA   | 0  | 0 | Not-determined | Genome-fragment | NA    | 0     |
| 56_extracted_k141_3443     | 1208  | No  | NA   | 0  | 0 | Not-determined | Genome-fragment | NA    | 0     |
| 56_extracted_k141_38631    | 5027  | No  | NA   | 0  | 0 | Not-determined | Genome-fragment | NA    | 0     |
| 58_vs_k141_189803  full    | 6012  | No  | NA   | 0  | 0 | Low-quality    | Genome-fragment | 17.64 | 0     |
| 56_extracted_k141_29134    | 2798  | No  | NA   | 0  | 0 | Not-determined | Genome-fragment | NA    | 0     |
| 58_vs_k141_25758  full     | 6014  | No  | NA   | 1  | 0 | Low-quality    | Genome-fragment | 14.05 | 0     |
| 514_vs_k141_10572  full    | 6016  | No  | NA   | 5  | 0 | Low-quality    | Genome-fragment | 15.04 | 0     |
| 56_extracted_k141_38642    | 1800  | No  | NA   | 0  | 1 | Not-determined | Genome-fragment | NA    | 0     |
| 56_extracted_k141_40924    | 3045  | No  | NA   | 0  | 3 | Not-determined | Genome-fragment | NA    | 0     |
| 516_vs_45001  full         | 6016  | No  | NA   | 2  | 0 | Low-quality    | Genome-fragment | 17.32 | 0     |
| 56_extracted_k141_5504     | 1258  | No  | NA   | 0  | 0 | Not-determined | Genome-fragment | NA    | 0     |
| 56_extracted_k141_36185    | 1160  | No  | NA   | 0  | 0 | Not-determined | Genome-fragment | NA    | 0     |
| 56_extracted_k141_12801    | 1124  | No  | NA   | 0  | 1 | Not-determined | Genome-fragment | NA    | 0     |
| 58_extracted_k141_4488     | 6018  | No  | NA   | 0  | 0 | Low-quality    | Genome-fragment | 3.56  | 0     |
| 56_extracted_k141_34138    | 1025  | No  | NA   | 0  | 0 | Not-determined | Genome-fragment | NA    | 0     |
| 56_extracted_k141_12818    | 1042  | No  | NA   | 0  | 1 | Not-determined | Genome-fragment | NA    | 0     |
| 56_extracted_k141_19300    | 3397  | No  | NA   | 0  | 2 | Not-determined | Genome-fragment | NA    | 0     |
| 56_extracted_k141_19301    | 1046  | No  | NA   | 0  | 0 | Not-determined | Genome-fragment | NA    | 0     |
| 56_extracted_k141_21797    | 1565  | No  | NA   | 0  | 2 | Not-determined | Genome-fragment | NA    | 0     |
| 56_extracted_k141_50235    | 1034  | No  | NA   | 0  | 1 | Not-determined | Genome-fragment | NA    | 0     |
| 56_extracted_k141_24744    | 1600  | No  | NA   | 0  | 0 | Not-determined | Genome-fragment | NA    | 0     |
| 56_extracted_k141_19321    | 1420  | No  | NA   | 0  | 1 | Not-determined | Genome-fragment | NA    | 0     |
| 514_extracted_k141_76835   | 6019  | No  | NA   | 1  | 0 | Low-quality    | Genome-fragment | 14.37 | 0     |
| 56_extracted_k141_54689    | 1685  | No  | NA   | 0  | 0 | Not-determined | Genome-fragment | NA    | 0     |
| 56_extracted_k141_15122    | 1512  | No  | NA   | 0  | 1 | Not-determined | Genome-fragment | NA    | 0     |
| 56_extracted_k141_36274    | 6100  | No  | NA   | 0  | 2 | Not-determined | Genome-fragment | NA    | 0     |
| 55_extracted_k141_56403    | 6019  | No  | NA   | 0  | 0 | Low-quality    | Genome-fragment | 43.34 | 0     |
| 54_extracted_11320         | 6019  | No  | NA   | 2  | 0 | Low-quality    | Genome-fragment | 8.39  | 0     |
| 56_extracted_k141_34208    | 7172  | No  | NA   | 0  | 3 | Not-determined | Genome-fragment | NA    | 0     |
| 56_extracted_k141_54747    | 1851  | No  | NA   | 0  | 2 | Not-determined | Genome-fragment | NA    | 0     |
| 56_extracted_k141_47996    | 2169  | No  | NA   | 0  | 2 | Not-determined | Genome-fragment | NA    | 0     |
| 56_extracted_k141_38772    | 3128  | No  | NA   | 0  | 0 | Not-determined | Genome-fragment | NA    | 0     |
| 56_extracted_k141_10318    | 1331  | No  | NA   | 0  | 0 | Not-determined | Genome-fragment | NA    | 0     |
| 56_extracted_k141_50309    | 1176  | No  | NA   | 0  | 0 | Not-determined | Genome-fragment | NA    | 0     |
| 56_extracted_k141_26613    | 2103  | No  | NA   | 0  | 0 | Not-determined | Genome-fragment | NA    | 0     |
| 56_extracted_k141_26615    | 1611  | No  | NA   | 0  | 3 | Not-determined | Genome-fragment | NA    | 0     |
| 56_extracted_k141_54781    | 1027  | No  | NA   | 0  | 2 | Not-determined | Genome-fragment | NA    | 0     |
| 56_extracted_k141_31501    | 1378  | No  | NA   | 0  | 1 | Not-determined | Genome-fragment | NA    | 0     |
| 56_extracted_k141_31502    | 1237  | No  | NA   | 0  | 0 | Not-determined | Genome-fragment | NA    | 0     |
| 516_vs_104951  full        | 6020  | No  | NA   | 0  | 3 | Low-quality    | Genome-fragment | 9.24  | 0     |
| 56_extracted_k141_34257    | 3930  | No  | NA   | 0  | 1 | Not-determined | Genome-fragment | NA    | 0     |
| 56_extracted_k141_10366    | 2103  | No  | NA   | 0  | 1 | Not-determined | Genome-fragment | NA    | 0     |
| 56_extracted_k141_5658     | 1868  | No  | NA   | 0  | 1 | Not-determined | Genome-fragment | NA    | 0     |
| 511_vs_k141_56577  full    | 6021  | No  | NA   | 0  | 0 | Low-quality    | Genome-fragment | 13.31 | 0     |
| 56_extracted_k141_10384    | 1549  | No  | NA   | 0  | 0 | Not-determined | Genome-fragment | NA    | 0     |
| 56_extracted_k141_41015    | 1244  | No  | NA   | 0  | 1 | Not-determined | Genome-fragment | NA    | 0     |
| 56_extracted_k141_21904    | 1035  | No  | NA   | 0  | 0 | Not-determined | Genome-fragment | NA    | 0     |
| 56_extracted_k141_10396    | 1091  | No  | NA   | 0  | 0 | Not-determined | Genome-fragment | NA    | 0     |
| 56_extracted_k141_19401    | 1226  | No  | NA   | 0  | 0 | Not-determined | Genome-fragment | NA    | 0     |
| 56_extracted_k141_38839    | 1136  | No  | NA   | 0  | 1 | Not-determined | Genome-fragment | NA    | 0     |
| 56_extracted_k141_17685    | 1251  | No  | NA   | 0  | 1 | Not-determined | Genome-fragment | NA    | 0     |
| 56_extracted_k141_15201    | 1013  | No  | NA   | 0  | 1 | Not-determined | Genome-fragment | NA    | 0     |
| 56_extracted_k141_3684     | 1015  | No  | NA   | 0  | 1 | Not-determined | Genome-fragment | NA    | 0     |
| 56_extracted_k141_10469    | 1023  | No  | NA   | 0  | 1 | Not-determined | Genome-fragment | NA    | 0     |
| 56_extracted_k141_10499    | 1105  | No  | NA   | 0  | 2 | Not-determined | Genome-fragment | NA    | 0     |
| 56_extracted_k141_15248    | 1459  | No  | NA   | 0  | 2 | Not-determined | Genome-fragment | NA    | 0     |
| 56_extracted_k141_17722    | 1821  | No  | NA   | 0  | 3 | Not-determined | Genome-fragment | NA    | 0     |
| 516_vs_44217  full         | 6021  | No  | NA   | 0  | 0 | Low-quality    | Genome-fragment | 13.94 | 0     |
| 53_extracted_k141_109599   | 6022  | No  | NA   | 10 | 0 | Low-quality    | Genome-fragment | 27.47 | 0     |
| 56_extracted_k141_36344    | 1062  | No  | NA   | 0  | 0 | Not-determined | Genome-fragment | NA    | 0     |
| 56_extracted_k141_38921    | 1076  | No  | NA   | 0  | 1 | Not-determined | Genome-fragment | NA    | 0     |
| 56_extracted_k141_17763    | 1763  | No  | NA   | 0  | 1 | Not-determined | Genome-fragment | NA    | 0     |
| 56_extracted_k141_29431    | 1007  | No  | NA   | 0  | 0 | Not-determined | Genome-fragment | NA    | 0     |
| 56_extracted_k141_8149     | 2759  | No  | NA   | 0  | 0 | Not-determined | Genome-fragment | NA    | 0     |
| 56_extracted_k141_17774    | 1170  | No  | NA   | 0  | 0 | Not-determined | Genome-fragment | NA    | 0     |
| 55_vs_k141_105929  full    | 6022  | No  | NA   | 2  | 0 | Low-quality    | Genome-fragment | 12.21 | 0     |
| 56_extracted_k141_13334    | 1145  | No  | 2007 | 1  | 1 | Not-determined | Genome-fragment | 0.93  | 66.68 |
| 514_vs_k141_89604  full    | 6023  | Yes | NA   | 1  | 2 | Low-quality    | Genome-fragment | 18.18 | 0     |
| 51_vs_k141_120728  full    | 6024  | No  | NA   | 0  | 0 | Low-quality    | Genome-fragment | NA    | 0     |
| 56_extracted_k141_36378    | 1117  | No  | NA   | 0  | 0 | Not-determined | Genome-fragment | NA    | 0     |
| 56_extracted_k141_19464    | 1139  | No  | NA   | 0  | 1 | Not-determined | Genome-fragment | NA    | 0     |
| 56_extracted_k141_36382    | 1759  | No  | NA   | 0  | 1 | Not-determined | Genome-fragment | NA    | 0     |
| 56_extracted_k141_29534    | 1418  | No  | NA   | 0  | 0 | Not-determined | Genome-fragment | NA    | 0     |
| 56_extracted_k141_11848    | 1256  | No  | NA   | 0  | 0 | Not-determined | Genome-fragment | NA    | 0     |
| 56_extracted_k141_31741    | 1053  | No  | NA   | 0  | 3 | Not-determined | Genome-fragment | NA    | 0     |
| 517_vs_k141_85273  full    | 6026  | No  | NA   | 1  | 0 | Low-quality    | Genome-fragment | 7.63  | 0     |
| 51_extracted_k141          |       |     |      |    |   |                |                 |       |       |



|                           |       |     |      |   |   |                |                 |      |       |
|---------------------------|-------|-----|------|---|---|----------------|-----------------|------|-------|
| 56_extracted_k141_34579   | 1552  | No  | NA   | 0 | 1 | Not-determined | Genome-fragment | NA   | 0     |
| 56_extracted_k141_1341    | 1029  | No  | NA   | 0 | 1 | Not-determined | Genome-fragment | NA   | 0     |
| 516_vs_83258  full        | 6038  | Yes | 5288 | 1 | 1 | Low-quality    | Genome-fragment | NA   | 3.37  |
| 512_extracted_k141_84301  | 6041  | No  | NA   | 0 | 0 | Low-quality    | Genome-fragment | NA   | 13.93 |
| 56_extracted_k141_1156    | 1377  | No  | NA   | 0 | 1 | Not-determined | Genome-fragment | NA   | 0     |
| 53_extracted_k141_28197   | 6042  | No  | NA   | 5 | 0 | Low-quality    | Genome-fragment | NA   | 10.09 |
| 56_extracted_k141_34672   | 1207  | No  | NA   | 0 | 0 | Not-determined | Genome-fragment | NA   | 0     |
| 58_extracted_k141_15813   | 6043  | No  | NA   | 1 | 0 | Low-quality    | Genome-fragment | NA   | 6.02  |
| 511_extracted_k141_15651  | 6044  | No  | NA   | 0 | 1 | Low-quality    | Genome-fragment | NA   | 8.56  |
| 517_extracted_k141_101487 | 6046  | No  | NA   | 1 | 0 | Low-quality    | Genome-fragment | NA   | 9.06  |
| 57_vs_103336  full        | 6047  | No  | NA   | 3 | 0 | Low-quality    | Genome-fragment | NA   | 9.33  |
| 56_extracted_k141_8387    | 1482  | No  | NA   | 0 | 2 | Not-determined | Genome-fragment | NA   | 0     |
| 56_extracted_k141_46221   | 1016  | No  | NA   | 0 | 0 | Not-determined | Genome-fragment | NA   | 0     |
| 56_extracted_k141_4092    | 1355  | No  | NA   | 0 | 0 | Not-determined | Genome-fragment | NA   | 0     |
| 57_vs_125910  full        | 6052  | No  | NA   | 0 | 0 | Low-quality    | Genome-fragment | NA   | 10.36 |
| 56_extracted_k141_18154   | 1124  | No  | NA   | 0 | 0 | Not-determined | Genome-fragment | NA   | 0     |
| 56_extracted_k141_34713   | 1130  | No  | NA   | 0 | 0 | Not-determined | Genome-fragment | NA   | 0     |
| 56_extracted_k141_41420   | 1398  | No  | NA   | 0 | 0 | Not-determined | Genome-fragment | NA   | 0     |
| 56_extracted_k141_19624   | 1211  | No  | NA   | 0 | 0 | Not-determined | Genome-fragment | NA   | 0     |
| 514_vs_k141_43042  full   | 6053  | No  | NA   | 5 | 0 | Low-quality    | Genome-fragment | NA   | 14.12 |
| 59_vs_k141_19806  full    | 6055  | No  | NA   | 0 | 0 | Low-quality    | Genome-fragment | NA   | 14.3  |
| 514_vs_k141_58202  full   | 6058  | No  | NA   | 5 | 0 | Low-quality    | Genome-fragment | NA   | 16.29 |
| 51_vs_k141_121394  full   | 6063  | No  | NA   | 6 | 0 | Low-quality    | Genome-fragment | NA   | 12.93 |
| 56_extracted_k141_13418   | 1662  | No  | NA   | 0 | 1 | Not-determined | Genome-fragment | NA   | 0     |
| 517_extracted_k141_17948  | 6064  | No  | NA   | 3 | 0 | Low-quality    | Genome-fragment | NA   | 9.09  |
| 56_extracted_k141_25268   | 1184  | No  | NA   | 0 | 0 | Not-determined | Genome-fragment | NA   | 0     |
| 56_extracted_k141_13448   | 1779  | No  | NA   | 0 | 0 | Not-determined | Genome-fragment | NA   | 0     |
| 56_extracted_k141_41487   | 1312  | No  | NA   | 0 | 0 | Not-determined | Genome-fragment | NA   | 0     |
| 56_extracted_k141_8537    | 1886  | No  | NA   | 0 | 0 | Not-determined | Genome-fragment | NA   | 0     |
| 56_extracted_k141_8539    | 3012  | No  | NA   | 0 | 3 | Not-determined | Genome-fragment | NA   | 0     |
| 56_extracted_k141_8542    | 1966  | No  | NA   | 0 | 1 | Not-determined | Genome-fragment | NA   | 0     |
| 56_extracted_k141_13474   | 1277  | No  | NA   | 0 | 1 | Not-determined | Genome-fragment | NA   | 0     |
| 51_extracted_k141_37186   | 6066  | No  | NA   | 6 | 0 | Low-quality    | Genome-fragment | NA   | 18.18 |
| 56_extracted_k141_48360   | 1075  | No  | NA   | 0 | 0 | Not-determined | Genome-fragment | NA   | 0     |
| 56_extracted_k141_15680   | 1010  | No  | NA   | 0 | 1 | Not-determined | Genome-fragment | NA   | 0     |
| 56_extracted_k141_56489   | 6067  | No  | NA   | 0 | 0 | Low-quality    | Genome-fragment | NA   | 5.1   |
| 517_extracted_k141_3772   | 6071  | Yes | 5720 | 1 | 1 | Low-quality    | Genome-fragment | NA   | 10.25 |
| 56_extracted_k141_1404    | 1615  | No  | NA   | 0 | 1 | Not-determined | Genome-fragment | NA   | 0     |
| 56_extracted_k141_4314    | 1385  | No  | NA   | 0 | 1 | Not-determined | Genome-fragment | NA   | 0     |
| 56_extracted_k141_4329    | 1139  | No  | NA   | 0 | 1 | Not-determined | Genome-fragment | NA   | 0     |
| 56_extracted_k141_46331   | 1043  | No  | NA   | 0 | 0 | Not-determined | Genome-fragment | NA   | 0     |
| 512_extracted_k141_76418  | 6075  | No  | NA   | 0 | 1 | Low-quality    | Genome-fragment | NA   | 5.66  |
| 56_extracted_k141_25329   | 1200  | No  | NA   | 0 | 2 | Not-determined | Genome-fragment | NA   | 0     |
| 56_extracted_k141_43699   | 1365  | No  | NA   | 0 | 0 | Not-determined | Genome-fragment | NA   | 0     |
| 56_extracted_k141_19801   | 4610  | No  | NA   | 0 | 1 | Not-determined | Genome-fragment | NA   | 0     |
| 56_extracted_k141_11536   | 2112  | No  | NA   | 0 | 0 | Not-determined | Genome-fragment | NA   | 0     |
| 55_vs_k141_3835  full     | 6075  | No  | NA   | 5 | 0 | Low-quality    | Genome-fragment | NA   | 15.99 |
| 56_extracted_k141_46370   | 2245  | No  | NA   | 0 | 1 | Not-determined | Genome-fragment | NA   | 0     |
| 55_vs_k141_61891  full    | 6076  | Yes | 2142 | 0 | 1 | Low-quality    | Genome-fragment | NA   | 4.98  |
| 56_extracted_k141_1427    | 4440  | No  | NA   | 0 | 1 | Not-determined | Genome-fragment | NA   | 64.75 |
| 514_vs_k141_102322  full  | 6079  | No  | NA   | 0 | 1 | Low-quality    | Genome-fragment | NA   | 12.18 |
| 516_vs_121972  full       | 6079  | No  | NA   | 0 | 1 | Low-quality    | Genome-fragment | NA   | 4.09  |
| 56_extracted_k141_29869   | 1641  | No  | NA   | 0 | 5 | Not-determined | Genome-fragment | NA   | 0     |
| 56_extracted_k141_29872   | 1177  | No  | NA   | 0 | 2 | Not-determined | Genome-fragment | NA   | 0     |
| 56_extracted_k141_15756   | 3686  | No  | NA   | 0 | 0 | Not-determined | Genome-fragment | NA   | 0     |
| 56_extracted_k141_43718   | 2840  | No  | NA   | 0 | 2 | Not-determined | Genome-fragment | NA   | 0     |
| 56_extracted_k141_13569   | 1073  | No  | NA   | 0 | 1 | Not-determined | Genome-fragment | NA   | 0     |
| 56_extracted_k141_1461    | 1202  | No  | NA   | 0 | 1 | Not-determined | Genome-fragment | NA   | 0     |
| 56_extracted_k141_21379   | 2389  | No  | NA   | 0 | 1 | Not-determined | Genome-fragment | NA   | 0     |
| 56_extracted_k141_6158    | 3048  | No  | NA   | 0 | 3 | Not-determined | Genome-fragment | NA   | 0     |
| 517_vs_k141_66040  full   | 6080  | No  | NA   | 7 | 0 | Low-quality    | Genome-fragment | NA   | 8.66  |
| 56_extracted_k141_53413   | 2329  | No  | NA   | 0 | 0 | Not-determined | Genome-fragment | NA   | 0     |
| 55_extracted_k141_126748  | 6080  | No  | NA   | 3 | 0 | Low-quality    | Genome-fragment | NA   | 14.19 |
| 56_extracted_k141_34881   | 1057  | No  | NA   | 0 | 1 | Not-determined | Genome-fragment | NA   | 0     |
| 56_extracted_k141_21411   | 1092  | No  | NA   | 0 | 1 | Not-determined | Genome-fragment | NA   | 0     |
| 56_extracted_k141_55108   | 1064  | No  | NA   | 0 | 1 | Not-determined | Genome-fragment | NA   | 0     |
| 516_extracted_49495       | 6082  | No  | NA   | 0 | 0 | Low-quality    | Genome-fragment | NA   | 14.74 |
| 56_extracted_k141_29905   | 3913  | No  | NA   | 0 | 1 | Not-determined | Genome-fragment | NA   | 0     |
| 512_extracted_k141_105517 | 6084  | No  | NA   | 0 | 0 | Low-quality    | Genome-fragment | NA   | 9.4   |
| 58_extracted_k141_182108  | 6084  | No  | NA   | 1 | 0 | Low-quality    | Genome-fragment | NA   | 5.55  |
| 51_extracted_k141_23678   | 6085  | No  | NA   | 2 | 1 | Low-quality    | Genome-fragment | NA   | 7.55  |
| 56_extracted_k141_27214   | 1008  | No  | NA   | 0 | 1 | Not-determined | Genome-fragment | NA   | 0     |
| 56_extracted_k141_18334   | 1839  | No  | NA   | 0 | 1 | Not-determined | Genome-fragment | NA   | 0     |
| 58_vs_k141_1161  full     | 6085  | No  | NA   | 0 | 1 | Low-quality    | Genome-fragment | NA   | 8.28  |
| 56_extracted_k141_41749   | 1701  | No  | NA   | 0 | 1 | Not-determined | Genome-fragment | NA   | 0     |
| 55_vs_k141_14440  full    | 6088  | No  | NA   | 7 | 0 | Low-quality    | Genome-fragment | NA   | 14.34 |
| 56_extracted_k141_27250   | 1092  | No  | NA   | 0 | 0 | Not-determined | Genome-fragment | NA   | 0     |
| 511_vs_k141_34567  full   | 6090  | No  | NA   | 4 | 0 | Low-quality    | Genome-fragment | NA   | 14.25 |
| 511_vs_k141_46004  full   | 6090  | No  | NA   | 0 | 1 | Low-quality    | Genome-fragment | NA   | 3.03  |
| 56_extracted_k141_46477   | 1749  | No  | NA   | 0 | 2 | Not-determined | Genome-fragment | NA   | 0     |
| 56_extracted_k141_30051   | 5045  | No  | NA   | 0 | 2 | Not-determined | Genome-fragment | NA   | 0     |
| 56_extracted_k141_6314    | 7600  | No  | NA   | 0 | 0 | Medium-quality | Genome-fragment | NA   | 54.72 |
| 56_extracted_k141_53575   | 1094  | No  | NA   | 0 | 0 | Not-determined | Genome-fragment | NA   | 0     |
| 56_extracted_k141_43789   | 1533  | No  | NA   | 0 | 1 | Not-determined | Genome-fragment | NA   | 0     |
| 515_extracted_60789       | 6091  | No  | NA   | 0 | 1 | Low-quality    | Genome-fragment | NA   | 5.61  |
| 56_extracted_k141_22536   | 1071  | No  | NA   | 0 | 1 | Not-determined | Genome-fragment | NA   | 0     |
| 56_extracted_k141_32194   | 1890  | No  | NA   | 0 | 0 | Not-determined | Genome-fragment | NA   | 0     |
| 56_extracted_k141_55287   | 1269  | No  | NA   | 0 | 1 | Not-determined | Genome-fragment | NA   | 0     |
| 56_extracted_k141_39221   | 2079  | No  | NA   | 0 | 0 | Not-determined | Genome-fragment | NA   | 0     |
| 56_extracted_k141_32210   | 1017  | No  | NA   | 0 | 0 | Not-determined | Genome-fragment | NA   | 0     |
| 516_extracted_137562      | 6095  | No  | NA   | 5 | 0 | Low-quality    | Genome-fragment | NA   | 17.14 |
| 56_extracted_k141_22561   | 1345  | No  | NA   | 0 | 1 | Not-determined | Genome-fragment | NA   | 0     |
| 56_extracted_k141_55309   | 1171  | No  | NA   | 0 | 1 | Not-determined | Genome-fragment | NA   | 0     |
| 56_extracted_k141_55313   | 1999  | No  | NA   | 0 | 0 | Not-determined | Genome-fragment | NA   | 0     |
| 56_extracted_k141_18408   | 1314  | No  | NA   | 0 | 2 | Not-determined | Genome-fragment | NA   | 0     |
| 516_vs_28348  full        | 6096  | No  | NA   | 1 | 0 | Low-quality    | Genome-fragment | NA   | 17.62 |
| 56_vs_k141_28260  full    | 6096  | No  | NA   | 6 | 0 | Low-quality    | Genome-fragment | NA   | 17.5  |
| 56_extracted_k141_15971   | 3912  | No  | NA   | 0 | 1 | Not-determined | Genome-fragment | NA   | 0     |
| 56_extracted_k141_19901   | 1145  | No  | NA   | 0 | 1 | Not-determined | Genome-fragment | NA   | 0     |
| 56_extracted_k141_35001   | 1319  | No  | NA   | 0 | 0 | Not-determined | Genome-fragment | NA   | 0     |
| 510_vs_30061  full        | 6098  | No  | NA   | 2 | 1 | Low-quality    | Genome-fragment | NA   | 13.99 |
| 56_extracted_k141_35003   | 1172  | No  | NA   | 0 | 1 | Not-determined | Genome-fragment | NA   | 0     |
| 56_extracted_k141_6425    | 1006  | No  | NA   | 0 | 0 | Not-determined | Genome-fragment | NA   | 0     |
| 56_extracted_k141_15558   | 1849  | No  | NA   | 0 | 1 | Not-determined | Genome-fragment | NA   | 0     |
| 56_extracted_k141_36840   | 1489  | No  | NA   | 0 | 0 | Not-determined | Genome-fragment | NA   | 0     |
| 56_extracted_k141_27917   | 1384  | No  | NA   | 0 | 1 | Not-determined | Genome-fragment | NA   | 0     |
| 512_vs_k141_59826  full   | 6100  | No  | NA   | 4 | 0 | Low-quality    | Genome-fragment | NA   | 8.43  |
| 58_vs_k141_100049  full   | 6101  | Yes | 3215 | 2 | 1 | Low-quality    | Genome-fragment | NA   | 47.3  |
| 511_extracted_k141_78468  | 6105  | No  | NA   | 0 | 2 | Low-quality    | Genome-fragment | NA   | 7.61  |
| 56_extracted_k141_6466    | 1503  | No  | NA   | 0 | 1 | Not-determined | Genome-fragment | NA   | 0     |
| 56_extracted_k141_41951   | 1011  | No  | NA   | 0 | 1 | Not-determined | Genome-fragment | NA   | 0     |
| 56_extracted_k141_32336   | 1260  | No  | NA   | 0 | 1 | Not-determined | Genome-fragment | NA   | 0     |
| 56_extracted_k141_16011   | 1772  | No  | NA   | 0 | 1 | Not-determined | Genome-fragment | NA   | 0     |
| 53_extracted_k141_1370    | 6105  | No  | NA   | 5 | 0 | Low-quality    | Genome-fragment | NA   | 3.72  |
| 56_extracted_k141_19943   | 2773  | No  | NA   | 1 | 0 | Not-determined | Genome-fragment | NA   | 14.53 |
| 516_vs_59032  full        | 6106  | No  | NA   | 2 | 0 | Low-quality    | Genome-fragment | NA   | 0     |
| 56_extracted_k141_46642   | 1230  | No  | NA   | 0 | 0 | Not-determined | Genome-fragment | NA   | 0     |
| 516_vs_31259  full        | 6109  | No  | NA   | 0 | 0 | Low-quality    | Genome-fragment | NA   | 46.76 |
| 56_extracted_k141_27389   | 1747  | No  | NA   | 0 | 2 | Not-determined | Genome-fragment | NA   | 0     |
| 56_extracted_k141_18511   | 1034  | No  | NA   | 0 | 0 | Not-determined | Genome-fragment | NA   | 0     |
| 56_extracted_k141_27400   | 1626  | No  | NA   | 0 | 1 | Not-determined | Genome-fragment | NA   | 0     |
| 56_extracted_k141_18533   | 1088  | No  | NA   | 0 | 2 | Not-determined | Genome-fragment | NA   | 0     |
| 512_extracted_k141_132600 | 6112  | No  | NA   | 1 | 0 | Low-quality    | Genome-fragment | NA   | 9.91  |
| 56_extracted_k141_13855   | 1273  | No  | NA   | 0 | 0 | Not-determined | Genome-fragment | NA   | 0     |
| 56_extracted_k141_4540    | 1034  | No  | NA   | 0 | 1 | Not-determined | Genome-fragment | NA   | 0     |
| 56_extracted_k141_27438   | 2476  | No  | NA   | 0 | 2 | Not-determined | Genome-fragment | NA   | 0     |
| 56_extracted_k141_27447   | 1082  | No  | NA   | 0 | 1 | Not-determined | Genome-fragment | NA   | 0     |
| 56_extracted_k141_27460   | 1363  | No  | NA   | 0 | 0 | Not-determined | Genome-fragment | NA   | 0     |
| 56_extracted_k141_32402   | 1688  | No  | NA   | 0 | 1 | Not-determined | Genome-fragment | NA   | 0     |
| 56_extracted_k141_48448   | 8330  | No  | NA   | 0 | 5 | Not-determined | Genome-fragment | NA   | 0     |
| 53_extracted_k141_52075   | 6113  | No  | NA   | 4 | 0 | Low-quality    | Genome-fragment | NA   | 15.03 |
| 56_extracted_k141_42096   | 1020  | No  | NA   | 0 | 1 | Not-determined | Genome-fragment | NA   | 0     |
| 57_vs_14606  full         | 6113  | No  | NA   | 0 | 0 | Low-quality    | Genome-fragment | NA   | 13.6  |
| 57_vs_64421  full         | 6113  | No  | NA   | 1 | 0 | Low-quality    | Genome-fragment | NA   | 3.41  |
| 56_extracted_k141_27510   | 10720 | No  | NA   | 0 | 1 | Not-determined | Genome-fragment | NA   | 0     |
| 56_extracted_k141_27513   | 1172  | No  | NA   | 0 | 2 | Not-determined | Genome-fragment | NA   | 0     |
| 516_extracted_105180      | 6113  | No  | NA   | 0 | 4 | Low-quality    | Genome-fragment | NA   | 1.99  |
| 56_extracted_k141_13990   | 1047  | No  | NA   | 0 | 2 | Not-determined | Genome-fragment | NA   | 0     |
| 56_extracted_k141_8845    | 2818  | No  | NA   | 0 | 0 | Not-determined | Genome-fragment | NA   | 0     |
| 55_vs_k141_62229  full    | 6114  | No  | NA   | 5 | 0 | Low-quality    | Genome-fragment | NA   | 16.76 |
| 516_vs_14307  full        | 6115  | No  | NA   | 3 | 0 | Low-quality    | Genome-fragment | NA   | 4.41  |
| 56_extracted_k141_43169   | 1065  | No  | NA   | 0 | 1 | Not-determined | Genome-fragment | NA   | 0     |
| 56_extracted_k141_53795   | 1077  | No  | NA   | 0 | 0 | Not-determined | Genome-fragment | NA   | 0     |
| 56_extracted_k141_20043   | 1195  | No  | NA   | 0 | 0 | Not-determined | Genome-fragment | NA</ |       |



|                           |        |     |    |      |   |                |                 |                 |       |      |
|---------------------------|--------|-----|----|------|---|----------------|-----------------|-----------------|-------|------|
| 56_extracted_k141_32763   | 1438   | No  | NA | 0    | 1 | Not-determined | Genome-fragment | NA              | 0     |      |
| 56_extracted_k141_18726   | 3232   | No  | NA | 0    | 1 | Not-determined | Genome-fragment | NA              | 0     |      |
| 56_extracted_k141_53908   | 1052   | No  | NA | 0    | 0 | Not-determined | Genome-fragment | NA              | 0     |      |
| 56_extracted_k141_55545   | 1527   | No  | NA | 0    | 0 | Not-determined | Genome-fragment | NA              | 0     |      |
| 56_extracted_k141_53946   | 1063   | No  | NA | 0    | 1 | Not-determined | Genome-fragment | NA              | 0     |      |
| 56_extracted_k141_35667   | 6336   | No  | NA | 0    | 2 | Low-quality    | Genome-fragment | NA              | 12.2  |      |
| 56_extracted_k141_27567   | 1646   | No  | NA | 0    | 1 | Not-determined | Genome-fragment | NA              | 0     |      |
| 56_extracted_k141_36882   | 1360   | No  | NA | 0    | 0 | Not-determined | Genome-fragment | NA              | 0     |      |
| 56_extracted_k141_8888    | 19917  | No  | NA | 0    | 1 | Not-determined | Genome-fragment | NA              | 0     |      |
| 56_extracted_k141_44089   | 3965   | No  | NA | 0    | 0 | Not-determined | Genome-fragment | NA              | 0     |      |
| 56_extracted_k141_11367   | 1359   | No  | NA | 0    | 1 | Not-determined | Genome-fragment | NA              | 0     |      |
| 56_extracted_k141_21160   | 1028   | No  | NA | 0    | 1 | Not-determined | Genome-fragment | NA              | 0     |      |
| 53_vs_k141_60011[full]    | 6143   | No  | NA | 0    | 3 | Low-quality    | Genome-fragment | NA              | 3.31  |      |
| 56_extracted_k141_54014   | 1740   | No  | NA | 0    | 1 | Not-determined | Genome-fragment | NA              | 0     |      |
| 55_vs_k141_31206[full]    | 6144   | No  | NA | 3    | 1 | Low-quality    | Genome-fragment | NA              | 9.15  |      |
| 56_extracted_k141_39550   | 1425   | No  | NA | 0    | 4 | Not-determined | Genome-fragment | NA              | 0     |      |
| 56_extracted_k141_39565   | 1939   | No  | NA | 0    | 0 | Not-determined | Genome-fragment | NA              | 0     |      |
| 56_extracted_k141_35305   | 4759   | No  | NA | 0    | 2 | Not-determined | Genome-fragment | NA              | 0     |      |
| 56_extracted_k141_26954   | 1256   | No  | NA | 0    | 1 | Not-determined | Genome-fragment | NA              | 0     |      |
| 59_vs_k141_33485[full]    | 6146   | No  | NA | 1    | 2 | Low-quality    | Genome-fragment | NA              | 3.24  |      |
| 57_extracted_102256       | 6147   | No  | NA | 4    | 0 | Low-quality    | Genome-fragment | NA              | 21.53 |      |
| 56_extracted_k141_20242   | 1215   | No  | NA | 0    | 2 | Not-determined | Genome-fragment | NA              | 0     |      |
| 56_extracted_k141_46795   | 7359   | No  | NA | 0    | 3 | Not-determined | Genome-fragment | NA              | 0     |      |
| 56_extracted_k141_1808    | 1592   | No  | NA | 0    | 0 | Not-determined | Genome-fragment | NA              | 0     |      |
| 514_extracted_k141_112874 | 6149   | No  | NA | 0    | 0 | Low-quality    | Genome-fragment | NA              | 13.82 |      |
| 56_extracted_k141_36982   | 1136   | No  | NA | 0    | 0 | Not-determined | Genome-fragment | NA              | 0     |      |
| 56_extracted_k141_25680   | 4727   | No  | NA | 0    | 2 | Not-determined | Genome-fragment | NA              | 0     |      |
| 56_extracted_k141_27662   | 1530   | No  | NA | 0    | 1 | Not-determined | Genome-fragment | NA              | 0     |      |
| 56_extracted_k141_46849   | 8502   | No  | NA | 0    | 1 | Not-determined | Genome-fragment | NA              | 0     |      |
| 56_extracted_k141_25696   | 1461   | No  | NA | 0    | 1 | Not-determined | Genome-fragment | NA              | 0     |      |
| 56_extracted_k141_54152   | 1494   | No  | NA | 0    | 1 | Not-determined | Genome-fragment | NA              | 0     |      |
| 516_extracted_100394      | 6151   | No  | NA | 0    | 1 | Low-quality    | Genome-fragment | NA              | 14.48 |      |
| 56_extracted_k141_25710   | 4050   | No  | NA | 6    | 0 | High-quality   | High-quality    | 100             | 0     |      |
| 56_extracted_k141_16352   | 1283   | No  | NA | 0    | 1 | Not-determined | Genome-fragment | NA              | 0     |      |
| 56_vs_k141_3652[full]     | 6151   | No  | NA | 0    | 1 | Low-quality    | Genome-fragment | NA              | 9.86  |      |
| 56_extracted_k141_39655   | 2643   | No  | NA | 0    | 2 | Not-determined | Genome-fragment | NA              | 0     |      |
| 56_extracted_k141_23401   | 6183   | No  | NA | 0    | 7 | Not-determined | Genome-fragment | NA              | 0     |      |
| 53_vs_k141_120071[full]   | 6153   | No  | NA | 1    | 0 | Low-quality    | Genome-fragment | NA              | 14.85 |      |
| 56_extracted_k141_30538   | 1014   | No  | NA | 0    | 1 | Not-determined | Genome-fragment | NA              | 0     |      |
| 56_extracted_k141_48930   | 1253   | No  | NA | 0    | 2 | Not-determined | Genome-fragment | NA              | 0     |      |
| 56_extracted_k141_39710   | 1447   | No  | NA | 0    | 0 | Not-determined | Genome-fragment | NA              | 0     |      |
| 56_extracted_k141_55663   | 1093   | No  | NA | 0    | 0 | Not-determined | Genome-fragment | NA              | 0     |      |
| 56_extracted_k141_25800   | 1091   | No  | NA | 0    | 2 | Not-determined | Genome-fragment | NA              | 0     |      |
| 56_extracted_k141_55668   | 1161   | No  | NA | 0    | 2 | Not-determined | Genome-fragment | NA              | 0     |      |
| 56_extracted_k141_44262   | 1882   | No  | NA | 0    | 1 | Not-determined | Genome-fragment | NA              | 0     |      |
| 512_vs_k141_27528[full]   | 6153   | Yes | NA | 3561 | 0 | Low-quality    | Genome-fragment | NA              | 2.18  |      |
| 56_extracted_k141_55690   | 6525   | No  | NA | 0    | 4 | Not-determined | Genome-fragment | NA              | 42.13 |      |
| 56_extracted_k141_25838   | 1365   | No  | NA | 0    | 0 | Not-determined | Genome-fragment | NA              | 0     |      |
| 56_extracted_k141_48991   | 1146   | No  | NA | 0    | 0 | Not-determined | Genome-fragment | NA              | 0     |      |
| 56_extracted_k141_25844   | 7701   | No  | NA | 0    | 3 | Not-determined | Genome-fragment | NA              | 0     |      |
| 511_extracted_k141_78700  | 6154   | No  | NA | 3    | 0 | Low-quality    | Genome-fragment | NA              | 17.71 |      |
| 512_vs_k141_186405[full]  | 6154   | No  | NA | 0    | 1 | Low-quality    | Genome-fragment | NA              | 11.66 |      |
| 56_extracted_k141_23519   | 1465   | No  | NA | 0    | 2 | Not-determined | Genome-fragment | NA              | 0     |      |
| 56_extracted_k141_55753   | 1332   | No  | NA | 0    | 2 | Not-determined | Genome-fragment | NA              | 0     |      |
| 56_extracted_k141_16426   | 1554   | No  | NA | 0    | 0 | Not-determined | Genome-fragment | NA              | 0     |      |
| 56_extracted_k141_20447   | 2271   | No  | NA | 0    | 2 | Not-determined | Genome-fragment | NA              | 0     |      |
| 56_extracted_k141_16436   | 1242   | No  | NA | 0    | 1 | Not-determined | Genome-fragment | NA              | 0     |      |
| 56_extracted_k141_8985    | 1172   | No  | NA | 0    | 1 | Not-determined | Genome-fragment | NA              | 0     |      |
| 56_extracted_k141_1836    | 1308   | No  | NA | 0    | 0 | Not-determined | Genome-fragment | NA              | 0     |      |
| 56_extracted_k141_9057    | 1052   | No  | NA | 0    | 0 | Not-determined | Genome-fragment | NA              | 0     |      |
| 56_extracted_k141_37216   | 1106   | No  | NA | 0    | 3 | Not-determined | Genome-fragment | NA              | 0     |      |
| 56_extracted_k141_39912   | 1311   | No  | NA | 0    | 0 | Not-determined | Genome-fragment | NA              | 0     |      |
| 57_vs_32626[full]         | 6156   | No  | NA | 0    | 2 | Low-quality    | Genome-fragment | NA              | 14.37 |      |
| 56_extracted_k141_39930   | 1332   | No  | NA | 0    | 0 | Not-determined | Genome-fragment | NA              | 0     |      |
| 56_extracted_k141_9076    | 4578   | No  | NA | 4    | 4 | Not-determined | Genome-fragment | NA              | 0     |      |
| 57_vs_69678[full]         | 6157   | No  | NA | 5    | 0 | Low-quality    | Genome-fragment | NA              | 17.1  |      |
| 56_extracted_k141_9090    | 1318   | No  | NA | 0    | 1 | Not-determined | Genome-fragment | NA              | 0     |      |
| 516_vs_55718[full]        | 6159   | No  | NA | 0    | 6 | Low-quality    | Genome-fragment | NA              | 4.24  |      |
| 56_extracted_k141_9144    | 1154   | No  | NA | 0    | 0 | Not-determined | Genome-fragment | NA              | 0     |      |
| 512_vs_k141_151923[full]  | 6160   | No  | NA | 0    | 2 | Low-quality    | Genome-fragment | NA              | 1.76  |      |
| 56_extracted_k141_55825   | 1614   | No  | NA | 0    | 1 | Not-determined | Genome-fragment | NA              | 10.7  |      |
| 510_vs_51623[full]        | 6164   | No  | NA | 0    | 0 | Low-quality    | Genome-fragment | NA              | 0     |      |
| 56_extracted_k141_55834   | 1334   | No  | NA | 0    | 1 | Not-determined | Genome-fragment | NA              | 0     |      |
| 56_extracted_k141_91478   | 1233   | No  | NA | 0    | 1 | Not-determined | Genome-fragment | NA              | 0     |      |
| 56_extracted_k141_2059    | 2954   | No  | NA | 0    | 2 | Not-determined | Genome-fragment | NA              | 0     |      |
| 51_vs_k141_39109[full]    | 6167   | No  | NA | 2    | 0 | Low-quality    | Genome-fragment | NA              | 10.72 |      |
| 56_extracted_k141_49197   | 1145   | No  | NA | 0    | 0 | Not-determined | Genome-fragment | NA              | 0     |      |
| 56_extracted_k141_27700   | 3026   | No  | NA | 0    | 1 | Not-determined | Genome-fragment | NA              | 0     |      |
| 56_extracted_k141_27708   | 3319   | No  | NA | 0    | 0 | Not-determined | Genome-fragment | NA              | 0     |      |
| 56_extracted_k141_55924   | 1714   | No  | NA | 0    | 2 | Not-determined | Genome-fragment | NA              | 0     |      |
| 56_vs_k141_24590[full]    | 6169   | Yes | NA | 3937 | 4 | 1              | Low-quality     | Genome-fragment | NA    | 8.77 |
| 56_extracted_k141_55967   | 1557   | No  | NA | 0    | 0 | Not-determined | Genome-fragment | NA              | 36.18 |      |
| 57_vs_72610[full]         | 6171   | No  | NA | 3    | 0 | Low-quality    | Genome-fragment | NA              | 17.11 |      |
| 56_extracted_k141_51177   | 1002   | No  | NA | 0    | 0 | Not-determined | Genome-fragment | NA              | 0     |      |
| 56_extracted_k141_49303   | 2710   | No  | NA | 0    | 2 | Not-determined | Genome-fragment | NA              | 0     |      |
| 56_extracted_k141_49304   | 2018   | No  | NA | 0    | 0 | Not-determined | Genome-fragment | NA              | 0     |      |
| 516_extracted_93732       | 6171   | Yes | NA | 4553 | 2 | 1              | Low-quality     | Genome-fragment | NA    | 2.4  |
| 56_extracted_k141_37391   | 1152   | No  | NA | 0    | 0 | Not-determined | Genome-fragment | NA              | 26.22 |      |
| 515_extracted_34508       | 6173   | No  | NA | 0    | 0 | Low-quality    | Genome-fragment | NA              | 0     |      |
| 56_extracted_k141_56026   | 1114   | No  | NA | 0    | 1 | Not-determined | Genome-fragment | NA              | 6.19  |      |
| 58_extracted_k141_43823   | 6173   | No  | NA | 0    | 0 | Low-quality    | Genome-fragment | NA              | 6.18  |      |
| 511_vs_k141_67735[full]   | 6174   | No  | NA | 0    | 0 | Low-quality    | Genome-fragment | NA              | 10.67 |      |
| 511_extracted_k141_18830  | 6176   | No  | NA | 0    | 4 | Low-quality    | Genome-fragment | NA              | 4.94  |      |
| 56_extracted_k141_40036   | 1394   | No  | NA | 0    | 1 | Not-determined | Genome-fragment | NA              | 13.92 |      |
| 55_vs_k141_17315[full]    | 6177   | No  | NA | 0    | 0 | Low-quality    | Genome-fragment | NA              | 0     |      |
| 56_extracted_k141_9372    | 2376   | No  | NA | 0    | 0 | Not-determined | Genome-fragment | NA              | 0     |      |
| 56_extracted_k141_20676   | 1164   | No  | NA | 0    | 1 | Not-determined | Genome-fragment | NA              | 0     |      |
| 56_extracted_k141_51334   | 1320   | No  | NA | 0    | 0 | Not-determined | Genome-fragment | NA              | 0     |      |
| 56_extracted_k141_51429   | 1157   | No  | NA | 0    | 2 | Not-determined | Genome-fragment | NA              | 0     |      |
| 56_extracted_k141_37591   | 1092   | No  | NA | 0    | 1 | Not-determined | Genome-fragment | NA              | 0     |      |
| 56_extracted_k141_51496   | 1233   | No  | NA | 0    | 1 | Not-determined | Genome-fragment | NA              | 0     |      |
| 56_extracted_k141_37630   | 2945   | No  | NA | 0    | 2 | Not-determined | Genome-fragment | NA              | 0     |      |
| 56_extracted_k141_56237   | 2674   | No  | NA | 0    | 6 | Not-determined | Genome-fragment | NA              | 0     |      |
| 56_extracted_k141_56240   | 7147   | No  | NA | 0    | 4 | Not-determined | Genome-fragment | NA              | 0     |      |
| 56_extracted_k141_56246   | 5315   | No  | NA | 0    | 2 | Not-determined | Genome-fragment | NA              | 0     |      |
| 56_extracted_k141_37654   | 2497   | No  | NA | 0    | 0 | Not-determined | Genome-fragment | NA              | 0     |      |
| 56_extracted_k141_37665   | 1299   | No  | NA | 0    | 1 | Not-determined | Genome-fragment | NA              | 0     |      |
| 56_vs_k141_140930[full]   | 6177   | No  | NA | 2    | 0 | Low-quality    | Genome-fragment | NA              | 7.34  |      |
| 56_extracted_k141_20834   | 2277   | No  | NA | 0    | 1 | Not-determined | Genome-fragment | NA              | 0     |      |
| 56_extracted_k141_51615   | 1412   | No  | NA | 0    | 1 | Not-determined | Genome-fragment | NA              | 0     |      |
| 56_extracted_k141_27930   | 1019   | No  | NA | 0    | 1 | Not-determined | Genome-fragment | NA              | 16.06 |      |
| 51_vs_k141_73809[full]    | 6179   | No  | NA | 0    | 0 | Low-quality    | Genome-fragment | NA              | 17.71 |      |
| 514_vs_k141_104144[full]  | 6182   | No  | NA | 1    | 1 | Low-quality    | Genome-fragment | NA              | 16.01 |      |
| 56_extracted_k141_51669   | 1433   | No  | NA | 0    | 0 | Not-determined | Genome-fragment | NA              | 0     |      |
| 56_extracted_k141_56256   | 1068   | No  | NA | 0    | 0 | Not-determined | Genome-fragment | NA              | 0     |      |
| 56_extracted_k141_21017   | 1149   | No  | NA | 0    | 0 | Not-determined | Genome-fragment | NA              | 0     |      |
| 53_vs_k141_66500[full]    | 6182   | No  | NA | 0    | 1 | Low-quality    | Genome-fragment | NA              | 4.15  |      |
| 56_extracted_k141_56450   | 4601   | No  | NA | 0    | 3 | Not-determined | Genome-fragment | NA              | 17.02 |      |
| 55_vs_k141_62217[full]    | 6184   | No  | NA | 0    | 0 | Low-quality    | Genome-fragment | NA              | 0     |      |
| 56_extracted_k141_28243   | 1128   | No  | NA | 0    | 1 | Not-determined | Genome-fragment | NA              | 100   |      |
| 56_extracted_k141_56484   | 47845  | No  | NA | 27   | 1 | Complete       | High-quality    | 100             | 0     |      |
| 513_vs_54827[full]        | 6186   | No  | NA | 1    | 0 | Low-quality    | Genome-fragment | NA              | 6.73  |      |
| 56_extracted_k141_56486   | 107433 | No  | NA | 18   | 4 | Complete       | High-quality    | 100             | 0     |      |
| 57_extracted_59125        | 6186   | No  | NA | 6    | 0 | Low-quality    | Genome-fragment | NA              | 3.53  |      |
| 56_vs_k141_13886[full]    | 38613  | No  | NA | 10   | 1 | High-quality   | High-quality    | 100             | 0     |      |
| 56_vs_k141_56485[full]    | 40038  | No  | NA | 22   | 0 | High-quality   | High-quality    | 95.95           | 0     |      |
| 56_vs_k141_56490[full]    | 35374  | No  | NA | 24   | 2 | High-quality   | High-quality    | 100             | 0     |      |
| 56_vs_k141_56491[full]    | 45642  | No  | NA | 26   | 0 | High-quality   | High-quality    | 100             | 0     |      |
| 56_vs_k141_56492[full]    | 45676  | No  | NA | 13   | 0 | High-quality   | High-quality    | 93.65           | 0     |      |
| 56_vs_k141_56493[full]    | 13326  | No  | NA | 2    | 1 | High-quality   | High-quality    | 91.72           | 0     |      |
| 56_vs_k141_56496[full]    | 49540  | No  | NA | 20   | 0 | High-quality   | High-quality    | 100             | 0     |      |
| 56_vs_k141_56498[full]    | 13635  | No  | NA | 15   | 1 | High-quality   | High-quality    | 96.19           | 0     |      |
| 56_vs_k141_51844[full]    | 1681   | No  | NA | 0    | 0 | Not-determined | Genome-fragment | NA              | 0     |      |
| 56_vs_k141_51846[full]    | 2974   | No  | NA | 0    | 2 | Not-determined | Genome-fragment | NA              | 14.42 |      |
| 55_extracted_k141_124473  | 6181   | No  | NA | 5    | 0 | Low-quality    | Genome-fragment | NA              | 8.68  |      |
| 517_vs_k141_149224[full]  | 6192   | No  | NA | 0    | 0 | Low-quality    | Genome-fragment | NA              | 0     |      |
| 56_vs_k141_23612[full]    | 1461   | No  | NA | 0    | 2 | Not-determined | Genome-fragment | NA              | 0     |      |
| 512_vs_k141_447[full]     | 6194   | No  | NA | 3    | 0 | Low-quality    | Genome-fragment | NA              | 14.09 |      |
| 53_vs_k141_46149[full]    | 6196   | No  | NA | 4    | 0 | Low-quality    | Genome-fragment | NA              | 10.26 |      |
| 56_vs_k141_30651[full]    | 1014   | No  | NA | 0    | 0 | Not-determined | Genome-fragment | NA              | 0     |      |
| 52_vs_k141_14056[full]    | 6199   | No  | NA | 1    | 0 | Low-quality    | Genome-fragment | NA              | 15.08 |      |
| 56_vs_k141_58[full]       | 1105   | No  | NA | 0    | 1 | Not-determined | Genome-fragment | NA              | 0     |      |
| 513_vs_7689[full]         | 6201   | No  | NA | 0    | 2 | Low-quality    | Genome-fragment | NA              | 10.95 |      |
| 56_vs_k141_24241[full]    | 4170   | No  | NA |      |   |                |                 |                 |       |      |



|                             |       |     |       |    |    |                |                 |       |       |
|-----------------------------|-------|-----|-------|----|----|----------------|-----------------|-------|-------|
| 516_vs_201341[full]         | 6235  | No  | NA    | 0  | 0  | Low-quality    | Genome-fragment | 6.32  | 0     |
| 56_vs_k141_16671[full]      | 1963  | No  | NA    | 2  | 2  | Not-determined | Genome-fragment | NA    | 0     |
| 516_vs_1457451[full]        | 6235  | No  | NA    | 0  | 0  | Low-quality    | Genome-fragment | NA    | 16.43 |
| 56_vs_k141_23659[full]      | 1168  | No  | NA    | 0  | 1  | Not-determined | Genome-fragment | NA    | 0     |
| 56_vs_k141_2441[full]       | 5109  | No  | NA    | 0  | 3  | Not-determined | Genome-fragment | NA    | 0     |
| 56_vs_k141_17949[full]      | 1930  | No  | NA    | 0  | 1  | Not-determined | Genome-fragment | NA    | 0     |
| 56_vs_k141_23667[full]      | 1474  | No  | NA    | 0  | 0  | Not-determined | Genome-fragment | NA    | 0     |
| 56_vs_k141_26013[full]      | 5361  | No  | NA    | 0  | 4  | Not-determined | Genome-fragment | NA    | 0     |
| 514_extracted_k141_106866   | 6236  | No  | NA    | 0  | 0  | Low-quality    | Genome-fragment | 3.99  | 0     |
| 56_vs_k141_37967[full]      | 2100  | No  | NA    | 0  | 2  | Not-determined | Genome-fragment | NA    | 0     |
| 53_vs_k141_65251[full]      | 6237  | No  | NA    | 1  | 0  | Low-quality    | Genome-fragment | 45.28 | 0     |
| 56_vs_k141_40228[full]      | 5067  | No  | NA    | 3  | 3  | Not-determined | Genome-fragment | NA    | 0     |
| 56_vs_k141_11900[full]      | 4802  | No  | NA    | 0  | 1  | Not-determined | Genome-fragment | NA    | 0     |
| 510_vs_55098[full]          | 6237  | No  | NA    | 1  | 0  | Low-quality    | Genome-fragment | 4.04  | 0     |
| 58_vs_k141_57484[full]      | 6241  | No  | NA    | 2  | 1  | Low-quality    | Genome-fragment | 10.35 | 0     |
| 56_vs_k141_2482[full]       | 2675  | No  | NA    | 0  | 0  | Not-determined | Genome-fragment | NA    | 0     |
| 56_vs_k141_2861[full]       | 1549  | No  | NA    | 0  | 1  | Not-determined | Genome-fragment | NA    | 0     |
| 56_vs_k141_37866[full]      | 3238  | No  | NA    | 0  | 1  | Not-determined | Genome-fragment | NA    | 0     |
| 56_vs_k141_37989[full]      | 2286  | No  | NA    | 0  | 0  | Not-determined | Genome-fragment | NA    | 0     |
| 59_vs_k141_54163[full]      | 6243  | No  | NA    | 0  | 1  | Low-quality    | Genome-fragment | 11.34 | 0     |
| 516_extracted_14128         | 6243  | No  | NA    | 0  | 2  | Low-quality    | Genome-fragment | 21.18 | 0     |
| 55_extracted_k141_60260     | 6244  | Yes | 5189  | 1  | 2  | Low-quality    | Genome-fragment | 1.98  | 16.9  |
| 511_vs_k141_11386[full]     | 6245  | No  | NA    | 3  | 0  | Low-quality    | Genome-fragment | 17.78 | 0     |
| 517_extracted_k141_70935    | 6246  | No  | NA    | 1  | 0  | Low-quality    | Genome-fragment | 3.39  | 0     |
| 512_extracted_k141_159642   | 6246  | No  | NA    | 2  | 0  | Low-quality    | Genome-fragment | 10.41 | 0     |
| 56_vs_k141_34700[full]      | 6246  | No  | NA    | 1  | 0  | Low-quality    | Genome-fragment | 12.19 | 0     |
| 53_extracted_k141_85523     | 6248  | Yes | 4864  | 1  | 1  | Low-quality    | Genome-fragment | 12.51 | 22.15 |
| 56_vs_k141_21312[full]      | 1731  | No  | NA    | 0  | 1  | Not-determined | Genome-fragment | NA    | 0     |
| 56_vs_k141_45011[full]      | 4236  | No  | NA    | 0  | 3  | Not-determined | Genome-fragment | NA    | 0     |
| 517_extracted_k141_30738    | 6258  | No  | NA    | 2  | 0  | Low-quality    | Genome-fragment | 10.32 | 0     |
| 53_extracted_k141_28514     | 6267  | No  | NA    | 0  | 5  | Low-quality    | Genome-fragment | 3.25  | 0     |
| 517_vs_k141_11440[full]     | 6273  | Yes | 2990  | 1  | 2  | Low-quality    | Genome-fragment | 1.39  | 52.34 |
| 56_vs_k141_33255[full]      | 3657  | No  | NA    | 0  | 2  | Not-determined | Genome-fragment | NA    | 0     |
| 56_vs_k141_9609[full]       | 2228  | No  | NA    | 0  | 0  | Not-determined | Genome-fragment | NA    | 0     |
| 56_vs_k141_40295[full]      | 2441  | No  | NA    | 0  | 2  | Not-determined | Genome-fragment | NA    | 0     |
| 56_vs_k141_4021[full]       | 1436  | No  | NA    | 0  | 1  | Not-determined | Genome-fragment | NA    | 0     |
| 56_vs_k141_33315[full]      | 1526  | No  | NA    | 0  | 0  | Not-determined | Genome-fragment | NA    | 0     |
| 56_vs_k141_47236[full]      | 2032  | No  | NA    | 0  | 2  | Not-determined | Genome-fragment | NA    | 0     |
| 57_extracted_101918         | 6273  | No  | NA    | 1  | 1  | Low-quality    | Genome-fragment | 9.91  | 0     |
| 59_vs_k141_63884[full]      | 6274  | No  | NA    | 7  | 0  | Low-quality    | Genome-fragment | 17.14 | 0     |
| 56_vs_k141_12058[full]      | 3552  | No  | NA    | 0  | 4  | Not-determined | Genome-fragment | NA    | 2.93  |
| 512_vs_k141_134821[full]    | 6277  | No  | NA    | 0  | 4  | Low-quality    | Genome-fragment | NA    | 0     |
| 56_vs_k141_33333[full]      | 2303  | No  | NA    | 0  | 1  | Not-determined | Genome-fragment | NA    | 0     |
| 56_vs_k141_23792[full]      | 1466  | No  | NA    | 0  | 1  | Not-determined | Genome-fragment | NA    | 0     |
| 56_vs_k141_12068[full]      | 4471  | No  | NA    | 0  | 1  | Not-determined | Genome-fragment | NA    | 0     |
| 512_vs_k141_45029[full]     | 6277  | No  | NA    | 0  | 0  | Low-quality    | Genome-fragment | NA    | 15.87 |
| 56_vs_k141_4930[full]       | 7202  | No  | NA    | 0  | 3  | Not-determined | Genome-fragment | NA    | 0     |
| 56_vs_k141_12078[full]      | 1380  | No  | NA    | 0  | 2  | Not-determined | Genome-fragment | NA    | 0     |
| 56_vs_k141_28543[full]      | 3329  | No  | NA    | 0  | 0  | Not-determined | Genome-fragment | NA    | 0     |
| 511_extracted_k141_70347    | 6278  | No  | NA    | 0  | 2  | Low-quality    | Genome-fragment | 5.68  | 0     |
| 56_vs_k141_35580[full]      | 2802  | No  | NA    | 0  | 3  | Not-determined | Genome-fragment | NA    | 0     |
| 56_vs_k141_12471[full]      | 2962  | No  | NA    | 0  | 1  | Not-determined | Genome-fragment | NA    | 0     |
| 56_vs_k141_47282[full]      | 1499  | No  | NA    | 0  | 1  | Not-determined | Genome-fragment | NA    | 0     |
| 57_vs_10778[full]           | 6282  | No  | NA    | 0  | 0  | Low-quality    | Genome-fragment | 15.72 | 0     |
| 58_vs_k141_40312[full]      | 6286  | No  | NA    | 6  | 0  | Low-quality    | Genome-fragment | 15.09 | 0     |
| 511_vs_k141_13439[full]     | 6288  | No  | NA    | 0  | 0  | Low-quality    | Genome-fragment | 13.59 | 0     |
| 57_vs_61686[full]           | 6291  | No  | NA    | 2  | 0  | Low-quality    | Genome-fragment | 10.76 | 0     |
| 511_vs_k141_16441[full]     | 6293  | No  | NA    | 1  | 1  | Low-quality    | Genome-fragment | 15.1  | 0     |
| 53_extracted_k141_66761     | 6294  | No  | NA    | 0  | 0  | Low-quality    | Genome-fragment | 4.11  | 0     |
| 516_extracted_159246        | 6294  | No  | NA    | 6  | 0  | Low-quality    | Genome-fragment | 17.09 | 0     |
| 56_vs_k141_27591[full]      | 1216  | No  | NA    | 0  | 1  | Not-determined | Genome-fragment | NA    | 0     |
| 56_vs_k141_12275[full]      | 30882 | No  | NA    | 3  | 3  | Not-determined | Genome-fragment | NA    | 0     |
| 54_vs_VIRSorter_24249-cat_2 | 6294  | No  | NA    | 1  | 0  | Low-quality    | Genome-fragment | 14.39 | 0     |
| 56_vs_k141_33438[full]      | 2797  | No  | NA    | 0  | 3  | Not-determined | Genome-fragment | NA    | 0     |
| 55_extracted_k141_29671     | 6295  | No  | NA    | 2  | 0  | Low-quality    | Genome-fragment | 8.15  | 0     |
| 58_extracted_k141_5343      | 6297  | No  | NA    | 1  | 1  | Low-quality    | Genome-fragment | 19.3  | 0     |
| 57_vs_77781[full]           | 6299  | No  | NA    | 2  | 0  | Low-quality    | Genome-fragment | 18.62 | 0     |
| 56_vs_k141_38220[full]      | 5353  | No  | NA    | 0  | 2  | Not-determined | Genome-fragment | NA    | 0     |
| 56_vs_k141_45184[full]      | 3256  | No  | NA    | 0  | 0  | Not-determined | Genome-fragment | NA    | 0     |
| 516_vs_154361[full]         | 6299  | No  | NA    | 5  | 0  | Low-quality    | Genome-fragment | 16.18 | 0     |
| 53_extracted_k141_24799     | 6301  | No  | NA    | 0  | 1  | Low-quality    | Genome-fragment | 6.1   | 0     |
| 56_vs_k141_7282[full]       | 1089  | No  | NA    | 1  | 1  | Not-determined | Genome-fragment | NA    | 11.49 |
| 516_extracted_128446        | 6303  | No  | NA    | 0  | 1  | Low-quality    | Genome-fragment | NA    | 0     |
| 56_vs_k141_16898[full]      | 1807  | No  | NA    | 0  | 0  | Not-determined | Genome-fragment | NA    | 0     |
| 56_vs_k141_14586[full]      | 1217  | No  | NA    | 0  | 0  | Low-quality    | Genome-fragment | NA    | 6.26  |
| 51_extracted_k141_120978    | 6304  | No  | NA    | 0  | 0  | Low-quality    | Genome-fragment | NA    | 3.63  |
| 58_extracted_k141_86789     | 6305  | No  | NA    | 0  | 0  | Low-quality    | Genome-fragment | NA    | 14.49 |
| 59_vs_k141_70570[full]      | 6311  | Yes | 5678  | 4  | 0  | Low-quality    | Genome-fragment | 6.37  | 10.03 |
| 59_vs_k141_56166[full]      | 6311  | Yes | 5678  | 1  | 3  | Low-quality    | Genome-fragment | 10.99 | 0     |
| 51_extracted_k141_27563     | 6312  | No  | NA    | 7  | 0  | Low-quality    | Genome-fragment | 3.67  | 0     |
| 53_extracted_k141_115700    | 23415 | No  | NA    | 1  | 0  | Low-quality    | Genome-fragment | 62.87 | 0     |
| 56_vs_k141_38200[full]      | 4622  | No  | NA    | 0  | 3  | Not-determined | Genome-fragment | NA    | 0     |
| 56_vs_k141_47349[full]      | 6313  | No  | NA    | 4  | 0  | Low-quality    | Genome-fragment | 13.2  | 0     |
| 56_vs_k141_119121[full]     | 6313  | No  | NA    | 4  | 1  | Low-quality    | Genome-fragment | 5.76  | 0     |
| 57_vs_28338[full]           | 1306  | No  | NA    | 1  | 0  | Not-determined | Genome-fragment | NA    | 20.17 |
| 56_vs_k141_29671[full]      | 1306  | No  | NA    | 0  | 3  | Low-quality    | Genome-fragment | NA    | 100   |
| 53_extracted_k141_103601    | 6316  | No  | NA    | 0  | 10 | Complete       | High-quality    | 100   | 40.67 |
| 56_vs_k141_5784[full]       | 59903 | Yes | 35541 | 13 | 5  | Low-quality    | Genome-fragment | 10.35 | 35.21 |
| 59_vs_k141_11225[full]      | 6320  | No  | NA    | 5  | 3  | Low-quality    | Genome-fragment | 9.24  | 0     |
| 55_vs_k141_93553[full]      | 6322  | Yes | 4096  | 1  | 0  | Not-determined | Genome-fragment | NA    | 0     |
| 56_vs_k141_42909[full]      | 1110  | No  | NA    | 0  | 0  | Not-determined | Genome-fragment | NA    | 0     |
| 56_vs_k141_17571[full]      | 2536  | No  | NA    | 0  | 0  | Not-determined | Genome-fragment | NA    | 0     |
| 56_vs_k141_29931[full]      | 2657  | No  | NA    | 0  | 1  | Not-determined | Genome-fragment | NA    | 0     |
| 56_vs_k141_38276[full]      | 1051  | No  | NA    | 0  | 1  | Not-determined | Genome-fragment | NA    | 0     |
| 512_vs_k141_56151[full]     | 6324  | No  | NA    | 0  | 1  | Low-quality    | Genome-fragment | 14.2  | 0     |
| 56_vs_k141_33534[full]      | 5242  | No  | NA    | 0  | 2  | Not-determined | Genome-fragment | NA    | 0     |
| 56_vs_k141_7394[full]       | 1100  | No  | NA    | 0  | 0  | Not-determined | Genome-fragment | NA    | 0     |
| 56_vs_k141_40592[full]      | 2966  | No  | NA    | 0  | 2  | Not-determined | Genome-fragment | NA    | 8.23  |
| 56_vs_k141_50287[full]      | 5178  | No  | NA    | 0  | 1  | Not-determined | Genome-fragment | NA    | 0     |
| 512_vs_k141_146000[full]    | 6328  | No  | NA    | 0  | 1  | Low-quality    | Genome-fragment | NA    | 0     |
| 56_vs_k141_38290[full]      | 1400  | No  | NA    | 0  | 2  | Not-determined | Genome-fragment | NA    | 0     |
| 56_vs_k141_12596[full]      | 2606  | No  | NA    | 0  | 0  | Not-determined | Genome-fragment | NA    | 0     |
| 56_vs_k141_26294[full]      | 2562  | No  | NA    | 0  | 0  | Not-determined | Genome-fragment | NA    | 0     |
| 56_vs_k141_35588[full]      | 1079  | No  | NA    | 0  | 1  | Not-determined | Genome-fragment | NA    | 0     |
| 517_extracted_k141_115720   | 6330  | No  | NA    | 0  | 0  | Low-quality    | Genome-fragment | 11.89 | 0     |
| 56_vs_k141_12395[full]      | 4557  | No  | NA    | 0  | 1  | Not-determined | Genome-fragment | NA    | 0     |
| 510_extracted_67691         | 6332  | No  | NA    | 2  | 0  | Low-quality    | Genome-fragment | 9.84  | 0     |
| 56_vs_k141_13604[full]      | 3016  | No  | NA    | 0  | 2  | Not-determined | Genome-fragment | NA    | 0     |
| 58_vs_k141_164439[full]     | 6333  | No  | NA    | 0  | 0  | Low-quality    | Genome-fragment | 8.24  | 0     |
| 513_extracted_4234          | 6338  | No  | NA    | 3  | 1  | Low-quality    | Genome-fragment | 5.81  | 0     |
| 515_extracted_46384         | 6339  | No  | NA    | 1  | 1  | Low-quality    | Genome-fragment | 3.44  | 0     |
| 56_vs_k141_38334[full]      | 3630  | No  | NA    | 0  | 0  | Not-determined | Genome-fragment | NA    | 0     |
| 51_vs_k141_76731[full]      | 6340  | No  | NA    | 0  | 3  | Low-quality    | Genome-fragment | 3.94  | 0     |
| 58_vs_k141_115471[full]     | 6342  | No  | NA    | 0  | 4  | Low-quality    | Genome-fragment | 5.58  | 0     |
| 58_extracted_k141_202914    | 6342  | No  | NA    | 0  | 0  | Low-quality    | Genome-fragment | 20.07 | 0     |
| 510_extracted_32563         | 6344  | No  | NA    | 0  | 5  | Low-quality    | Genome-fragment | 2.54  | 0     |
| 52_extracted_k141_9105      | 6346  | No  | NA    | 2  | 0  | Low-quality    | Genome-fragment | 15.17 | 0     |
| 511_extracted_k141_5967     | 6348  | No  | NA    | 0  | 0  | Low-quality    | Genome-fragment | 16.16 | 0     |
| 56_vs_k141_50781[full]      | 1951  | No  | NA    | 0  | 0  | Not-determined | Genome-fragment | NA    | 0     |
| 511_vs_k141_182411[full]    | 6349  | No  | NA    | 0  | 3  | Low-quality    | Genome-fragment | 4.67  | 0     |
| 513_extracted_46588         | 6352  | No  | NA    | 2  | 0  | Low-quality    | Genome-fragment | 10.66 | 0     |
| 58_extracted_k141_82754     | 6352  | No  | NA    | 0  | 2  | Low-quality    | Genome-fragment | 0.75  | 0     |
| 56_vs_k141_38360[full]      | 6968  | No  | NA    | 0  | 1  | Not-determined | Genome-fragment | NA    | 0     |
| 51_vs_k141_79911[full]      | 6358  | No  | NA    | 6  | 0  | Low-quality    | Genome-fragment | 13.88 | 0     |
| 510_extracted_91757         | 6359  | No  | NA    | 0  | 1  | Low-quality    | Genome-fragment | 10.69 | 0     |
| 56_vs_k141_54409[full]      | 1184  | No  | NA    | 0  | 1  | Not-determined | Genome-fragment | NA    | 0     |
| 56_vs_k141_26351[full]      | 3142  | No  | NA    | 0  | 3  | Not-determined | Genome-fragment | NA    | 0     |
| 510_extracted_91547         | 6362  | No  | NA    | 0  | 0  | Low-quality    | Genome-fragment | NA    | 14.31 |
| 56_vs_k141_7433[full]       | 2134  | No  | NA    | 0  | 1  | Not-determined | Genome-fragment | NA    | 0     |
| 55_vs_k141_127813[full]     | 6365  | No  | NA    | 6  | 0  | Low-quality    | Genome-fragment | 13.9  | 0     |
| 58_extracted_k141_115879    | 6366  | No  | NA    | 0  | 1  | Low-quality    | Genome-fragment | 9.66  | 0     |
| 56_vs_k141_43001[full]      | 2081  | No  | NA    | 0  | 1  | Not-determined | Genome-fragment | NA    | 0     |
| 56_vs_k141_26370[full]      | 2932  | No  | NA    | 0  | 0  | Not-determined | Genome-fragment | NA    | 0     |
| 56_vs_k141_21458[full]      | 2485  | No  | NA    | 0  | 0  | Not-determined | Genome-fragment | NA    | 5.99  |
| 53_extracted_k141_110730    | 6372  | No  | NA    | 2  | 0  | Low-quality    | Genome-fragment | 14.7  | 0     |
| 55_vs_k141_17317[full]      | 6372  | No  | NA    | 2  | 0  | Low-quality    | Genome-fragment | 11.78 | 0     |
| 57_vs_37977[full]           | 6372  | No  | NA    | 0  | 1  | Low-quality    | Genome-fragment | 9.15  | 0     |
| 55_vs_k141_35559[full]      | 6373  | No  | NA    | 1  | 1  | Low-quality    | Genome-fragment | 11.99 | 0     |
| 512_vs_k141_20993[full]     | 6375  | No  | NA    | 0  | 1  | Low-quality    | Genome-fragment | NA    | 0     |
| 56_vs_k141_31025[full]      | 1550  | No  | NA    | 0  | 1  | Not-determined | Genome-fragment | NA    | 0     |
| 51_vs_k141_34010[full]      | 6376  | No  | NA    | 5  | 0  | Low-quality    | Genome-fragment | 11.07 | 0     |
| 58_vs_k141_12596[full]      | 6380  | No  | NA    | 1  | 1  | Low-quality    |                 |       |       |



|                             |        |     |       |    |    |                |                 |       |       |
|-----------------------------|--------|-----|-------|----|----|----------------|-----------------|-------|-------|
| S3_extracted_k141_26896     | 6408   | No  | NA    | 1  | 0  | Low-quality    | Genome-fragment | 9.94  | 0     |
| S5_vs_k141_126051[full]     | 7882   | No  | NA    | 0  | 0  | Not-determined | Genome-fragment | NA    | 0     |
| S5_vs_k141_229961[full]     | 6412   | No  | NA    | 2  | 0  | Low-quality    | Genome-fragment | 16.32 | 0     |
| S11_extracted_k141_75658    | 6414   | No  | NA    | 3  | 0  | Low-quality    | Genome-fragment | 8.23  | 0     |
| S6_vs_k141_407621[full]     | 2677   | No  | NA    | 0  | 2  | Not-determined | Genome-fragment | NA    | 0     |
| S6_vs_k141_477001[full]     | 1275   | No  | NA    | 1  | 0  | Not-determined | Genome-fragment | NA    | 0     |
| S16_extracted_55714         | 6414   | No  | NA    | 1  | 1  | Low-quality    | Genome-fragment | 7.2   | 0     |
| S6_vs_k141_76941[full]      | 2267   | No  | NA    | 0  | 1  | Not-determined | Genome-fragment | NA    | 0     |
| S16_extracted_99183         | 6414   | No  | NA    | 7  | 0  | Low-quality    | Genome-fragment | 8.18  | 0     |
| S13_vs_936021[full]         | 6417   | No  | NA    | 0  | 1  | Low-quality    | Genome-fragment | 11.95 | 0     |
| S11_vs_k141_234121[full]    | 6423   | No  | NA    | 3  | 0  | Low-quality    | Genome-fragment | 2.49  | 0     |
| S5_vs_k141_277051[full]     | 6424   | No  | NA    | 1  | 2  | Low-quality    | Genome-fragment | 13.01 | 0     |
| S6_vs_k141_338071[full]     | 2111   | No  | NA    | 0  | 1  | Not-determined | Genome-fragment | NA    | 0     |
| S6_vs_k141_501541[full]     | 2085   | No  | NA    | 0  | 2  | Not-determined | Genome-fragment | NA    | 0     |
| S3_extracted_k141_85694     | 6426   | No  | NA    | 1  | 0  | Low-quality    | Genome-fragment | 3.64  | 0     |
| S12_vs_k141_1081841[full]   | 6426   | No  | NA    | 1  | 0  | Low-quality    | Genome-fragment | 8.67  | 0     |
| S17_vs_k141_1717951[full]   | 6428   | Yes | 5441  | 2  | 1  | Low-quality    | Genome-fragment | 7.36  | 15.35 |
| S3_extracted_k141_125073    | 6428   | No  | NA    | 5  | 0  | Low-quality    | Genome-fragment | 3.82  | 0     |
| S6_vs_k141_408051[full]     | 20774  | No  | NA    | 0  | 3  | Not-determined | Genome-fragment | NA    | 0     |
| S6_vs_k141_430971[full]     | 1354   | No  | NA    | 0  | 1  | Not-determined | Genome-fragment | NA    | 0     |
| S6_vs_k141_148771[full]     | 6595   | No  | NA    | 0  | 5  | Not-determined | Genome-fragment | NA    | 0     |
| S6_vs_k141_127211[full]     | 2354   | No  | NA    | 0  | 3  | Not-determined | Genome-fragment | NA    | 0     |
| S11_vs_k141_788801[full]    | 6433   | No  | NA    | 5  | 0  | Low-quality    | Genome-fragment | 15.13 | 0     |
| S10_extracted_31665         | 6436   | No  | NA    | 0  | 3  | Low-quality    | Genome-fragment | 1.61  | 0     |
| S16_vs_1622271[full]        | 6438   | No  | NA    | 0  | 5  | Low-quality    | Genome-fragment | 1.64  | 0     |
| S7_vs_270511[full]          | 6440   | No  | NA    | 6  | 0  | Low-quality    | Genome-fragment | 8.67  | 0     |
| S3_vs_k141_737431[full]     | 6444   | No  | NA    | 4  | 0  | Low-quality    | Genome-fragment | 15.55 | 0     |
| S6_vs_k141_457251[full]     | 2357   | No  | NA    | 0  | 2  | Not-determined | Genome-fragment | NA    | 0     |
| S16_vs_362601[full]         | 6444   | No  | NA    | 0  | 0  | Low-quality    | Genome-fragment | 16.13 | 0     |
| S4_vs_VIRSorter_13524-cat_2 | 6446   | No  | NA    | 4  | 0  | Low-quality    | Genome-fragment | 13.64 | 0     |
| S6_vs_k141_246001[full]     | 3641   | No  | NA    | 0  | 2  | Not-determined | Genome-fragment | NA    | 0     |
| S6_vs_k141_192331[full]     | 1459   | No  | NA    | 0  | 0  | Not-determined | Genome-fragment | NA    | 0     |
| S6_vs_k141_290571[full]     | 1891   | No  | NA    | 0  | 3  | Not-determined | Genome-fragment | NA    | 0     |
| S5_vs_k141_667201[full]     | 6447   | No  | NA    | 4  | 0  | Low-quality    | Genome-fragment | 15.56 | 0     |
| S16_extracted_80006         | 6450   | No  | NA    | 0  | 2  | Low-quality    | Genome-fragment | 2.91  | 0     |
| S9_vs_k141_118021[full]     | 6452   | No  | NA    | 0  | 0  | Low-quality    | Genome-fragment | 15.05 | 0     |
| S16_vs_1643701[full]        | 6452   | No  | NA    | 2  | 0  | Low-quality    | Genome-fragment | 16.65 | 0     |
| S6_vs_k141_131371[full]     | 2156   | No  | NA    | 0  | 1  | Not-determined | Genome-fragment | NA    | 0     |
| S5_extracted_k141_146078    | 6455   | Yes | 5860  | 1  | 0  | Low-quality    | Genome-fragment | 12.28 | 9.22  |
| S3_extracted_k141_86762     | 6459   | No  | NA    | 4  | 0  | Low-quality    | Genome-fragment | 22.62 | 0     |
| S16_extracted_107782        | 6467   | No  | NA    | 4  | 0  | Low-quality    | Genome-fragment | 14.37 | 0     |
| S6_vs_k141_658061[full]     | 2959   | No  | NA    | 1  | 2  | Not-determined | Genome-fragment | NA    | 0     |
| S16_vs_231571[full]         | 6467   | No  | NA    | 2  | 0  | Low-quality    | Genome-fragment | 7.85  | 0     |
| S8_extracted_k141_65709     | 6467   | No  | NA    | 0  | 4  | Low-quality    | Genome-fragment | 10.07 | 0     |
| S16_vs_1167021[full]        | 6469   | No  | NA    | 0  | 0  | Low-quality    | Genome-fragment | 1.61  | 0     |
| S6_vs_k141_10001[full]      | 2839   | No  | NA    | 2  | 2  | Not-determined | Genome-fragment | NA    | 0     |
| S12_extracted_k141_44086    | 6469   | No  | NA    | 4  | 0  | Low-quality    | Genome-fragment | 16.98 | 0     |
| S6_vs_k141_131371[full]     | 3734   | No  | NA    | 0  | 0  | Not-determined | Genome-fragment | NA    | 0     |
| S8_vs_k141_1442511[full]    | 6469   | No  | NA    | 0  | 0  | Low-quality    | Genome-fragment | NA    | 0     |
| S6_vs_k141_79451[full]      | 2329   | No  | NA    | 0  | 1  | Not-determined | Genome-fragment | NA    | 0     |
| S6_vs_k141_150021[full]     | 1187   | No  | NA    | 0  | 3  | Not-determined | Genome-fragment | NA    | 0     |
| S14_extracted_k141_110845   | 6473   | No  | NA    | 0  | 0  | Low-quality    | Genome-fragment | 21.23 | 0     |
| S12_vs_k141_1079521[full]   | 6475   | No  | NA    | 1  | 0  | Low-quality    | Genome-fragment | 1.82  | 0     |
| S6_vs_k141_408821[full]     | 2838   | No  | NA    | 0  | 0  | Not-determined | Genome-fragment | NA    | 0     |
| S6_vs_k141_432471[full]     | 6927   | No  | NA    | 0  | 3  | Not-determined | Genome-fragment | NA    | 0     |
| S9_extracted_k141_57739     | 6478   | No  | NA    | 0  | 0  | Low-quality    | Genome-fragment | 13.01 | 0     |
| S3_extracted_k141_46338     | 6479   | No  | NA    | 0  | 0  | Low-quality    | Genome-fragment | 14.71 | 0     |
| S6_vs_k141_54601[full]      | 6598   | Yes | 21709 | 11 | 28 | Medium-quality | Genome-fragment | 62.05 | 67.08 |
| S6_vs_k141_432611[full]     | 1529   | No  | NA    | 0  | 0  | Not-determined | Genome-fragment | NA    | 0     |
| S3_vs_k141_1138391[full]    | 6481   | No  | 3910  | 1  | 1  | Low-quality    | Genome-fragment | 7.84  | 39.67 |
| S17_extracted_k141_27767    | 6483   | No  | NA    | 0  | 1  | Low-quality    | Genome-fragment | 6.27  | 0     |
| S7_extracted_29351          | 6485   | No  | NA    | 6  | 0  | Low-quality    | Genome-fragment | 2.68  | 0     |
| S6_vs_k141_103091[full]     | 1777   | No  | NA    | 0  | 2  | Not-determined | Genome-fragment | NA    | 0     |
| S10_vs_815211[full]         | 6485   | Yes | 4129  | 1  | 2  | Low-quality    | Genome-fragment | 1.92  | 36.33 |
| S6_vs_k141_546451[full]     | 11708  | No  | NA    | 6  | 6  | Not-determined | Genome-fragment | NA    | 0     |
| S5_vs_k141_886971[full]     | 6491   | No  | NA    | 0  | 3  | Low-quality    | Genome-fragment | 2.51  | 0     |
| S16_extracted_104690        | 6499   | No  | NA    | 1  | 0  | Low-quality    | Genome-fragment | 4.24  | 0     |
| S6_vs_k141_117391[full]     | 1667   | No  | NA    | 0  | 1  | Not-determined | Genome-fragment | NA    | 0     |
| S6_vs_k141_187341[full]     | 1287   | No  | NA    | 0  | 0  | Not-determined | Genome-fragment | NA    | 0     |
| S17_extracted_k141_155563   | 6507   | No  | NA    | 4  | 0  | Low-quality    | Genome-fragment | 14.39 | 0     |
| S6_vs_k141_291521[full]     | 71717  | Yes | 53494 | 24 | 13 | Complete       | High-quality    | 100   | 25.41 |
| S3_extracted_k141_51462     | 6507   | No  | NA    | 1  | 2  | Low-quality    | Genome-fragment | 8.38  | 0     |
| S6_vs_k141_55571[full]      | 2637   | No  | NA    | 0  | 2  | Not-determined | Genome-fragment | NA    | 0     |
| S6_vs_k141_546881[full]     | 23930  | No  | NA    | 0  | 7  | Not-determined | Genome-fragment | NA    | 0     |
| S6_vs_k141_155221[full]     | 1653   | No  | NA    | 1  | 2  | Not-determined | Genome-fragment | NA    | 0     |
| S3_extracted_k141_51422     | 6509   | No  | NA    | 5  | 0  | Low-quality    | Genome-fragment | 16.74 | 0     |
| S16_vs_865241[full]         | 6515   | No  | NA    | 0  | 0  | Low-quality    | Genome-fragment | 21.89 | 0     |
| S16_extracted_34821         | 6516   | No  | NA    | 0  | 0  | Low-quality    | Genome-fragment | 10.25 | 0     |
| S8_extracted_k141_81554     | 6517   | No  | NA    | 0  | 1  | Low-quality    | Genome-fragment | 5.56  | 0     |
| S4_extracted_4142           | 6519   | No  | NA    | 2  | 0  | Low-quality    | Genome-fragment | 14.45 | 0     |
| S6_vs_k141_24821[full]      | 3809   | No  | NA    | 0  | 1  | Not-determined | Genome-fragment | NA    | 0     |
| S6_vs_k141_342041[full]     | 1954   | No  | NA    | 0  | 2  | Not-determined | Genome-fragment | NA    | 0     |
| S6_vs_k141_176091[full]     | 1800   | No  | NA    | 0  | 1  | Not-determined | Genome-fragment | NA    | 0     |
| S6_vs_k141_103141[full]     | 83752  | Yes | 28882 | 14 | 37 | Complete       | High-quality    | 100   | 65.51 |
| S9_vs_k141_549961[full]     | 6520   | No  | NA    | 2  | 0  | Low-quality    | Genome-fragment | 5.26  | 0     |
| S6_vs_k141_433761[full]     | 1293   | No  | NA    | 0  | 0  | Not-determined | Genome-fragment | NA    | 0     |
| S6_vs_k141_530511[full]     | 3028   | No  | NA    | 0  | 4  | Not-determined | Genome-fragment | NA    | 0     |
| S6_vs_k141_242271[full]     | 1898   | No  | NA    | 0  | 1  | Not-determined | Genome-fragment | NA    | 0     |
| S9_extracted_k141_44023     | 6522   | No  | NA    | 0  | 0  | Low-quality    | Genome-fragment | NA    | 0     |
| S6_vs_k141_409871[full]     | 1931   | No  | NA    | 0  | 1  | Not-determined | Genome-fragment | NA    | 0     |
| S6_vs_k141_56321[full]      | 1882   | No  | NA    | 0  | 0  | Not-determined | Genome-fragment | NA    | 0     |
| S6_vs_k141_409921[full]     | 1759   | No  | NA    | 0  | 1  | Not-determined | Genome-fragment | NA    | 0     |
| S5_vs_k141_744361[full]     | 6522   | No  | NA    | 1  | 0  | Low-quality    | Genome-fragment | 14.46 | 0     |
| S6_extracted_k141_8490      | 6524   | No  | NA    | 13 | 0  | Low-quality    | Genome-fragment | 21.5  | 0     |
| S6_vs_k141_35921[full]      | 2802   | No  | NA    | 0  | 2  | Not-determined | Genome-fragment | NA    | 0     |
| S11_vs_k141_422201[full]    | 6527   | No  | NA    | 1  | 0  | Low-quality    | Genome-fragment | NA    | 0     |
| S6_vs_k141_315511[full]     | 2002   | No  | NA    | 0  | 2  | Not-determined | Genome-fragment | NA    | 0     |
| S6_vs_k141_26021[full]      | 3318   | No  | NA    | 0  | 0  | Not-determined | Genome-fragment | NA    | 0     |
| S12_vs_k141_404781[full]    | 6527   | No  | NA    | 0  | 0  | Low-quality    | Genome-fragment | 9.62  | 0     |
| S12_extracted_k141_65799    | 6529   | No  | NA    | 0  | 1  | Low-quality    | Genome-fragment | 8.7   | 0     |
| S17_extracted_k141_119559   | 6530   | No  | NA    | 1  | 0  | Low-quality    | Genome-fragment | 8.29  | 0     |
| S6_vs_k141_548311[full]     | 1314   | No  | NA    | 11 | 1  | Not-determined | Genome-fragment | NA    | 0     |
| S6_vs_k141_56781[full]      | 1617   | No  | NA    | 0  | 0  | Not-determined | Genome-fragment | NA    | 0     |
| S16_vs_595001[full]         | 6538   | No  | NA    | 3  | 0  | Low-quality    | Genome-fragment | 6.03  | 0     |
| S11_vs_k141_459351[full]    | 6540   | No  | NA    | 8  | 2  | Low-quality    | Genome-fragment | 11.73 | 0     |
| S7_extracted_117718         | 6540   | No  | NA    | 0  | 0  | Low-quality    | Genome-fragment | 11.64 | 0     |
| S6_vs_k141_410241[full]     | 1730   | No  | NA    | 0  | 2  | Not-determined | Genome-fragment | NA    | 0     |
| S6_vs_k141_11461[full]      | 53780  | Yes | 34975 | 20 | 12 | High-quality   | High-quality    | 100   | 34.97 |
| S6_vs_k141_315691[full]     | 1183   | No  | NA    | 3  | 0  | Not-determined | Genome-fragment | NA    | 0     |
| S17_extracted_k141_2636     | 6542   | No  | NA    | 3  | 0  | Low-quality    | Genome-fragment | 14.5  | 0     |
| S6_vs_k141_119401[full]     | 1327   | No  | NA    | 0  | 1  | Not-determined | Genome-fragment | NA    | 0     |
| S10_vs_1206501[full]        | 6544   | No  | NA    | 0  | 0  | Low-quality    | Genome-fragment | 17.26 | 0     |
| S12_extracted_k141_146777   | 6544   | No  | NA    | 1  | 0  | Low-quality    | Genome-fragment | 5.48  | 0     |
| S17_extracted_k141_2179     | 6545   | Yes | 6057  | 1  | 1  | Low-quality    | Genome-fragment | 4.44  | 7.46  |
| S17_vs_k141_287061[full]    | 6547   | No  | NA    | 1  | 0  | Low-quality    | Genome-fragment | 2.15  | 0     |
| S6_vs_k141_460391[full]     | 111911 | No  | NA    | 2  | 23 | Medium-quality | Genome-fragment | 69.39 | 0     |
| S6_vs_k141_80921[full]      | 3462   | No  | NA    | 0  | 1  | Not-determined | Genome-fragment | NA    | 0     |
| S6_vs_k141_531371[full]     | 1404   | No  | NA    | 0  | 0  | Not-determined | Genome-fragment | NA    | 0     |
| S6_vs_k141_128451[full]     | 39137  | No  | NA    | 17 | 3  | Medium-quality | Genome-fragment | 68.58 | 0     |
| S4_extracted_4102           | 6549   | No  | NA    | 11 | 0  | Low-quality    | Genome-fragment | 21.6  | 0     |
| S14_vs_k141_517491[full]    | 6554   | No  | NA    | 4  | 0  | Low-quality    | Genome-fragment | 13.88 | 0     |
| S6_vs_k141_152541[full]     | 1553   | No  | NA    | 0  | 0  | Not-determined | Genome-fragment | NA    | 0     |
| S6_vs_k141_293911[full]     | 1104   | No  | NA    | 0  | 0  | Not-determined | Genome-fragment | NA    | 0     |
| S8_extracted_k141_102084    | 6556   | No  | NA    | 8  | 0  | Low-quality    | Genome-fragment | 20.39 | 0     |
| S8_extracted_k141_28480     | 6560   | No  | NA    | 0  | 0  | Low-quality    | Genome-fragment | 47.23 | 0     |
| S6_vs_k141_152631[full]     | 1938   | No  | NA    | 0  | 3  | Not-determined | Genome-fragment | NA    | 0     |
| S6_vs_k141_17431[full]      | 4823   | No  | NA    | 0  | 3  | Not-determined | Genome-fragment | NA    | 0     |
| S6_vs_k141_81591[full]      | 1288   | No  | NA    | 0  | 0  | Not-determined | Genome-fragment | NA    | 0     |
| S8_vs_k141_1887641[full]    | 6560   | Yes | 5738  | 1  | 1  | Low-quality    | Genome-fragment | 3.86  | 12.53 |
| S6_vs_k141_316101[full]     | 2577   | No  | NA    | 0  | 2  | Not-determined | Genome-fragment | NA    | 0     |
| S6_vs_k141_294241[full]     | 3109   | No  | NA    | 0  | 2  | Not-determined | Genome-fragment | NA    | 0     |
| S6_vs_k141_57621[full]      | 1423   | No  | NA    | 0  | 1  | Not-determined | Genome-fragment | NA    | 0     |
| S6_vs_k141_363431[full]     | 3902   | No  | NA    | 0  | 4  | Not-determined | Genome-fragment | NA    | 0     |
| S5_vs_k141_709331[full]     | 6562   | Yes | 5551  | 2  | 2  | Low-quality    | Genome-fragment | 13.14 | 15.41 |
| S12_vs_k141_359161[full]    | 6562   | No  | NA    | 1  | 0  | Low-quality    | Genome-fragment | 13.42 | 0     |
| S6_vs_k141_389241[full]     | 3653   | No  | NA    | 0  | 3  | Not-determined | Genome-fragment | NA    | 0     |
| S4_extracted_23882          | 6562   | No  | NA    | 0  | 0  | Low-quality    | Genome-fragment | NA    | 0     |
| S6_vs_k141_219811[full]     | 5169   | No  | NA    | 3  | 1  | Not-determined | Genome-fragment | NA    | 14.54 |
| S1_vs_k141_1078511[full]    | 6567   | No  | NA    | 4  | 0  | Low-quality    | Genome-fragment | NA    | 11.5  |
| S13_extracted_117599        | 6568   | No  | NA    | 2  | 1  | Low-quality    | Genome-fragment | 11.02 | 0     |
| S6_vs_k141_58121[full]      | 1379   | No  | NA    | 0  | 1  | Not-determined | Genome-fragment | NA    | 0     |
| S6_vs_k141_120051[full]     | 2619   | No  | NA    | 0  | 1  | Not-determined | Genome-fragment | NA</  |       |



|                            |       |     |      |    |    |                |                 |       |       |
|----------------------------|-------|-----|------|----|----|----------------|-----------------|-------|-------|
| 58_extracted_k141_26652    | 6610  | Yes | 5518 | 1  | 1  | Low-quality    | Genome-fragment | 3.18  | 16.52 |
| 56_vs_k141_29095  full     | 2696  | No  |      | 1  | 2  | Not-determined | Genome-fragment | NA    | 0     |
| 59_vs_k141_89924  full     | 6612  | No  |      | 2  | 0  | Low-quality    | Genome-fragment | 19.1  | 0     |
| 57_vs_41520  full          | 6612  | No  |      | 1  | 0  | Low-quality    | Genome-fragment | 17.04 | 0     |
| 56_vs_k141_41212  full     | 1100  | No  |      | 0  | 1  | Not-determined | Genome-fragment | NA    | 0     |
| 55_vs_k141_106139  full    | 6613  | No  |      | 1  | 4  | Low-quality    | Genome-fragment | 7.42  | 0     |
| 515_extracted_25551        | 6613  | No  |      | 1  | 0  | Low-quality    | Genome-fragment | 7.2   | 0     |
| 56_vs_k141_46091  full     | 30750 | No  |      | 21 | 2  | High-quality   | High-quality    | 93.45 | 0     |
| 56_extracted_k141_5145     | 6613  | No  |      | 1  | 0  | Low-quality    | Genome-fragment | 14.73 | 0     |
| 53_extracted_k141_76108    | 6615  | No  |      | 1  | 0  | Low-quality    | Genome-fragment | 4.95  | 0     |
| 56_vs_k141_50580  full     | 1357  | No  |      | 0  | 0  | Not-determined | Genome-fragment | NA    | 0     |
| 517_vs_k141_133847  full   | 6616  | No  |      | 3  | 0  | Low-quality    | Genome-fragment | 9.8   | 0     |
| 54_extracted_29314         | 6620  | No  |      | 0  | 1  | Low-quality    | Genome-fragment | 6.9   | 0     |
| 58_extracted_k141_178383   | 6620  | No  |      | 0  | 5  | Low-quality    | Genome-fragment | 4.65  | 0     |
| 56_vs_k141_18063  full     | 3561  | No  |      | 0  | 2  | Not-determined | Genome-fragment | NA    | 0     |
| 57_vs_69544  full          | 6621  | No  |      | 1  | 0  | Low-quality    | Genome-fragment | 18.11 | 0     |
| 55_extracted_k141_4415     | 6623  | No  |      | 5  | 0  | Low-quality    | Genome-fragment | 15.4  | 0     |
| 56_vs_k141_18067  full     | 1281  | No  |      | 0  | 0  | Not-determined | Genome-fragment | NA    | 0     |
| 56_vs_k141_11224  full     | 2352  | No  |      | 0  | 2  | Not-determined | Genome-fragment | NA    | 0     |
| 516_vs_110229  full        | 6643  | No  |      | 1  | 0  | Low-quality    | Genome-fragment | 1.75  | 0     |
| 56_vs_k141_41272  full     | 1649  | No  |      | 0  | 1  | Not-determined | Genome-fragment | NA    | 0     |
| 511_extracted_k141_24940   | 6647  | No  |      | 3  | 0  | Low-quality    | Genome-fragment | 10.55 | 0     |
| 517_vs_k141_3592  full     | 6649  | No  |      | 1  | 0  | Low-quality    | Genome-fragment | 1.82  | 0     |
| 53_vs_k141_121135  full    | 6649  | No  |      | 4  | 0  | Low-quality    | Genome-fragment | 15.85 | 0     |
| 56_vs_k141_18087  full     | 1930  | No  |      | 0  | 1  | Not-determined | Genome-fragment | NA    | 0     |
| 56_vs_k141_13340  full     | 2888  | No  |      | 0  | 2  | Not-determined | Genome-fragment | NA    | 0     |
| 56_vs_k141_10826  full     | 2554  | No  |      | 0  | 0  | Not-determined | Genome-fragment | NA    | 0     |
| 56_vs_k141_41333  full     | 1521  | No  |      | 0  | 0  | Not-determined | Genome-fragment | NA    | 0     |
| 59_vs_k141_73892  full     | 6650  | No  |      | 0  | 0  | Low-quality    | Genome-fragment | 16.85 | 0     |
| 56_vs_k141_15514  full     | 2994  | No  |      | 0  | 1  | Not-determined | Genome-fragment | NA    | 0     |
| 56_vs_k141_18102  full     | 3729  | No  |      | 0  | 2  | Not-determined | Genome-fragment | NA    | 0     |
| 513_extracted_107744       | 6653  | No  |      | 0  | 0  | Low-quality    | Genome-fragment | 16.82 | 0     |
| 56_vs_k141_55044  full     | 1247  | No  |      | 0  | 1  | Not-determined | Genome-fragment | NA    | 0     |
| 56_vs_k141_13362  full     | 2226  | No  |      | 0  | 1  | Not-determined | Genome-fragment | NA    | 0     |
| 514_vs_k141_12620  full    | 6667  | No  |      | 2  | 0  | Low-quality    | Genome-fragment | 17.1  | 0     |
| 55_vs_k141_140644  full    | 6667  | No  |      | 0  | 0  | Low-quality    | Genome-fragment | 8.77  | 0     |
| 515_vs_49694  full         | 6669  | No  |      | 0  | 3  | Low-quality    | Genome-fragment | 2.21  | 0     |
| 56_vs_k141_48279  full     | 13097 | No  |      | 0  | 1  | Not-determined | Genome-fragment | NA    | 0     |
| 56_vs_k141_8401  full      | 4419  | No  |      | 0  | 4  | Not-determined | Genome-fragment | NA    | 0     |
| 58_extracted_k141_119795   | 6670  | No  |      | 0  | 1  | Low-quality    | Genome-fragment | 15.19 | 0     |
| 56_vs_k141_41397  full     | 1679  | No  |      | 0  | 1  | Not-determined | Genome-fragment | NA    | 0     |
| 56_vs_k141_41400  full     | 1434  | No  |      | 0  | 1  | Not-determined | Genome-fragment | NA    | 0     |
| 58_vs_k141_60337  full     | 6670  | No  |      | 2  | 0  | Low-quality    | Genome-fragment | 6.93  | 0     |
| 56_vs_k141_13404  full     | 1853  | No  |      | 0  | 1  | Not-determined | Genome-fragment | NA    | 0     |
| 56_vs_k141_18351  full     | 1173  | No  |      | 0  | 1  | Not-determined | Genome-fragment | NA    | 0     |
| 56_vs_k141_17010  full     | 1401  | No  |      | 0  | 0  | Not-determined | Genome-fragment | NA    | 0     |
| 56_vs_k141_25219  full     | 1773  | No  |      | 0  | 0  | Not-determined | Genome-fragment | NA    | 0     |
| 56_vs_k141_22281  full     | 2505  | No  |      | 0  | 3  | Not-determined | Genome-fragment | NA    | 0     |
| 56_vs_k141_6476  full      | 1063  | No  |      | 0  | 1  | Not-determined | Genome-fragment | NA    | 0     |
| 58_extracted_k141_47493    | 6671  | No  |      | 0  | 4  | Low-quality    | Genome-fragment | 15.87 | 0     |
| 56_vs_k141_34765  full     | 1598  | No  |      | 0  | 2  | Not-determined | Genome-fragment | NA    | 0     |
| 56_vs_k141_25242  full     | 2022  | No  |      | 0  | 2  | Not-determined | Genome-fragment | NA    | 0     |
| 55_extracted_k141_38629    | 6673  | No  |      | 0  | 0  | Low-quality    | Genome-fragment | 10.54 | 0     |
| 512_extracted_k141_38990   | 6677  | No  |      | 2  | 0  | Low-quality    | Genome-fragment | 9.88  | 0     |
| 56_vs_k141_15549  full     | 1204  | No  |      | 2  | 0  | Not-determined | Genome-fragment | NA    | 0     |
| 512_vs_k141_102393  full   | 6677  | No  |      | 2  | 1  | Low-quality    | Genome-fragment | 7.84  | 0     |
| 56_vs_k141_34831  full     | 1187  | No  |      | 0  | 1  | Not-determined | Genome-fragment | NA    | 0     |
| 56_vs_k141_45302  full     | 4153  | No  |      | 0  | 3  | Not-determined | Genome-fragment | NA    | 0     |
| 56_vs_k141_29795  full     | 2990  | No  |      | 0  | 0  | Not-determined | Genome-fragment | NA    | 0     |
| 56_vs_k141_1395  full      | 2000  | No  |      | 0  | 2  | Not-determined | Genome-fragment | NA    | 0     |
| 58_extracted_k141_141158   | 6681  | No  |      | 1  | 0  | Low-quality    | Genome-fragment | 5.31  | 0     |
| 56_vs_k141_6587  full      | 1642  | No  |      | 0  | 0  | Not-determined | Genome-fragment | NA    | 0     |
| 56_vs_k141_29819  full     | 2200  | No  |      | 0  | 2  | Not-determined | Genome-fragment | NA    | 0     |
| 57_extracted_129544        | 6682  | No  |      | 1  | 0  | Low-quality    | Genome-fragment | 4.99  | 0     |
| 56_vs_k141_41546  full     | 1664  | No  |      | 1  | 0  | Not-determined | Genome-fragment | NA    | 0     |
| 514_extracted_k141_11733   | 6685  | No  |      | 0  | 4  | Low-quality    | Genome-fragment | 2.98  | 0     |
| 58_extracted_k141_83720    | 6690  | No  |      | 7  | 0  | Low-quality    | Genome-fragment | 10.41 | 0     |
| 56_vs_k141_51729  full     | 1348  | No  |      | 0  | 1  | Not-determined | Genome-fragment | NA    | 0     |
| 55_extracted_k141_15259    | 6695  | No  |      | 0  | 0  | Low-quality    | Genome-fragment | 12    | 0     |
| 56_vs_k141_8625  full      | 1804  | No  |      | 0  | 0  | Not-determined | Genome-fragment | NA    | 0     |
| 58_vs_k141_120944  full    | 6695  | No  |      | 6  | 0  | Low-quality    | Genome-fragment | 11.61 | 0     |
| 56_vs_k141_10944  full     | 1278  | No  |      | 1  | 0  | Not-determined | Genome-fragment | NA    | 0     |
| 56_vs_k141_4264  full      | 1915  | No  |      | 0  | 0  | Not-determined | Genome-fragment | NA    | 0     |
| 56_vs_k141_13550  full     | 1408  | No  |      | 0  | 1  | Not-determined | Genome-fragment | NA    | 0     |
| 59_extracted_k141_44651    | 6696  | No  |      | 3  | 0  | Low-quality    | Genome-fragment | 3.99  | 0     |
| 512_extracted_k141_172135  | 6699  | No  |      | 1  | 0  | Low-quality    | Genome-fragment | 6.15  | 0     |
| 56_vs_k141_4310  full      | 1355  | No  |      | 0  | 0  | Not-determined | Genome-fragment | NA    | 0     |
| 511_vs_k141_78020  full    | 6700  | No  |      | 0  | 0  | Low-quality    | Genome-fragment | 4.11  | 0     |
| 53_vs_k141_107719  full    | 6702  | No  |      | 0  | 0  | Low-quality    | Genome-fragment | 14.18 | 0     |
| 56_vs_k141_4319  full      | 3760  | No  |      | 0  | 1  | Not-determined | Genome-fragment | NA    | 0     |
| 56_vs_k141_2403  full      | 1585  | No  |      | 0  | 2  | Not-determined | Genome-fragment | NA    | 0     |
| 56_vs_k141_18006  full     | 1006  | No  |      | 0  | 1  | Not-determined | Genome-fragment | NA    | 0     |
| 56_vs_k141_4329  full      | 1487  | No  |      | 0  | 1  | Not-determined | Genome-fragment | NA    | 0     |
| 56_vs_k141_50596  full     | 1731  | No  |      | 0  | 1  | Not-determined | Genome-fragment | NA    | 0     |
| 56_vs_k141_56081  full     | 5695  | No  |      | 0  | 0  | Not-determined | Genome-fragment | NA    | 0     |
| 53_extracted_k141_112353   | 6704  | No  |      | 3  | 0  | Low-quality    | Genome-fragment | 13.87 | 0     |
| 53_extracted_k141_17637    | 6704  | No  |      | 4  | 0  | Low-quality    | Genome-fragment | 16.72 | 0     |
| 56_vs_k141_41636  full     | 38964 | No  |      | 0  | 20 | Not-determined | Genome-fragment | NA    | 0     |
| 53_extracted_k141_42654    | 6704  | No  |      | 1  | 0  | Low-quality    | Genome-fragment | 30.58 | 0     |
| 517_vs_k141_60795  full    | 6709  | No  |      | 1  | 0  | Low-quality    | Genome-fragment | 15.93 | 0     |
| 56_vs_k141_36704  full     | 1884  | No  |      | 0  | 1  | Not-determined | Genome-fragment | NA    | 0     |
| 56_vs_k141_29934  full     | 2911  | No  |      | 0  | 4  | Not-determined | Genome-fragment | NA    | 0     |
| 516_extracted_107025       | 6711  | Yes | 4767 | 2  | 1  | Low-quality    | Genome-fragment | 2.57  | 28.97 |
| 58_extracted_k141_1068334  | 6714  | No  |      | 5  | 0  | Low-quality    | Genome-fragment | 10.31 | 0     |
| 53_extracted_k141_47493    | 6716  | No  |      | 1  | 0  | Low-quality    | Genome-fragment | 17.14 | 0     |
| 55_extracted_k141_52365    | 6717  | Yes | 5231 | 1  | 1  | Low-quality    | Genome-fragment | 37.65 | 22.12 |
| 57_extracted_132857        | 6718  | No  |      | 4  | 0  | Low-quality    | Genome-fragment | 30.62 | 0     |
| 56_vs_k141_15813  full     | 46227 | No  |      | 17 | 0  | High-quality   | High-quality    | 100   | 0     |
| 511_extracted_k141_4147    | 6719  | No  |      | 1  | 0  | Low-quality    | Genome-fragment | 4.36  | 0     |
| 56_vs_k141_44288  full     | 6722  | No  |      | 0  | 0  | Low-quality    | Genome-fragment | 10.77 | 0     |
| 57_vs_48687  full          | 6723  | No  |      | 5  | 0  | Low-quality    | Genome-fragment | 12.75 | 0     |
| 54_extracted_14515         | 6723  | No  |      | 1  | 3  | Low-quality    | Genome-fragment | 16.99 | 0     |
| 53_vs_k141_95102  full     | 6728  | No  |      | 6  | 0  | Low-quality    | Genome-fragment | 19.56 | 0     |
| 57_vs_91153  full          | 6728  | No  |      | 1  | 0  | Low-quality    | Genome-fragment | 15.66 | 0     |
| 56_vs_k141_50271  full     | 6731  | No  |      | 0  | 1  | Low-quality    | Genome-fragment | 3.62  | 0     |
| 51_extracted_k141_41381    | 6732  | No  |      | 0  | 3  | Low-quality    | Genome-fragment | 2.53  | 0     |
| 55_vs_k141_50361  full     | 6732  | No  |      | 2  | 0  | Low-quality    | Genome-fragment | 14.57 | 0     |
| 58_extracted_k141_139332   | 6734  | No  |      | 1  | 0  | Low-quality    | Genome-fragment | 4.39  | 0     |
| 56_vs_k141_13346  full     | 3036  | No  |      | 0  | 1  | Not-determined | Genome-fragment | NA    | 0     |
| 56_vs_k141_11031  full     | 1315  | No  |      | 0  | 0  | Not-determined | Genome-fragment | NA    | 0     |
| 517_vs_k141_13831  full    | 6735  | No  |      | 5  | 0  | Low-quality    | Genome-fragment | 9.5   | 0     |
| 56_vs_k141_55233  full     | 2558  | No  |      | 0  | 2  | Not-determined | Genome-fragment | NA    | 0     |
| 512_vs_k141_70145  full    | 6736  | No  |      | 0  | 4  | Low-quality    | Genome-fragment | 11.69 | 0     |
| 56_vs_k141_53564  full     | 1558  | No  |      | 0  | 1  | Not-determined | Genome-fragment | NA    | 0     |
| 53_vs_k141_12960  full     | 6740  | No  |      | 0  | 0  | Low-quality    | Genome-fragment | 4.15  | 0     |
| 56_vs_k141_30022  full     | 1250  | No  |      | 1  | 0  | Not-determined | Genome-fragment | NA    | 0     |
| 55_vs_k141_82682  full     | 6740  | No  |      | 3  | 0  | Low-quality    | Genome-fragment | 14.98 | 0     |
| 514_vs_k141_47266  full    | 6744  | No  |      | 4  | 0  | Low-quality    | Genome-fragment | 17.7  | 0     |
| 56_vs_k141_12162  full     | 2648  | No  |      | 0  | 3  | Not-determined | Genome-fragment | NA    | 0     |
| 511_vs_k141_10313  full    | 6745  | No  |      | 1  | 0  | Low-quality    | Genome-fragment | 13.35 | 0     |
| 516_vs_8173  full          | 6746  | No  |      | 2  | 0  | Low-quality    | Genome-fragment | 13.8  | 0     |
| 514_vs_k141_679081  full   | 6747  | No  |      | 0  | 2  | Low-quality    | Genome-fragment | 7.8   | 0     |
| 56_vs_k141_34951  full     | 1587  | No  |      | 0  | 1  | Not-determined | Genome-fragment | NA    | 0     |
| 56_vs_k141_30077  full     | 1968  | No  |      | 0  | 0  | Not-determined | Genome-fragment | NA    | 0     |
| 517_extracted_k141_82838   | 6750  | No  |      | 1  | 0  | Medium-quality | Genome-fragment | 2.91  | 0     |
| 55_vs_k141_29562  full     | 6751  | No  |      | 3  | 0  | Low-quality    | Genome-fragment | 16.1  | 0     |
| 56_vs_k141_15919  full     | 1545  | No  |      | 0  | 1  | Not-determined | Genome-fragment | NA    | 0     |
| 57_extracted_81843         | 6752  | No  |      | 1  | 0  | Low-quality    | Genome-fragment | 3.9   | 0     |
| 515_extracted_42026        | 6752  | No  |      | 2  | 0  | Low-quality    | Genome-fragment | 14.92 | 0     |
| 57_extracted_785           | 6753  | No  |      | 1  | 0  | Low-quality    | Genome-fragment | 16.65 | 0     |
| 512_extracted_k141_97913   | 6754  | No  |      | 0  | 0  | Low-quality    | Genome-fragment | 5.87  | 0     |
| 56_vs_k141_46556  full     | 1725  | No  |      | 0  | 1  | Not-determined | Genome-fragment | NA    | 0     |
| 56_vs_k141_53605  full     | 2459  | No  |      | 0  | 3  | Not-determined | Genome-fragment | NA    | 0     |
| 58_vs_k141_129561  full    | 6757  | No  |      | 2  | 0  | Low-quality    | Genome-fragment | 16.01 | 0     |
| 56_vs_k141_15461  full     | 2787  | No  |      | 0  | 0  | Not-determined | Genome-fragment | NA    | 0     |
| 56_vs_k141_55372  full     | 1479  | No  |      | 0  | 1  | Not-determined | Genome-fragment | NA    | 0     |
| 54_vs_VBSorter_31146-cat_1 | 6759  | No  |      | 9  | 0  | Low-quality    | Genome-fragment | 19.32 | 0     |
| 59_vs_k141_69040  full     | 6761  | No  |      | 3  | 0  | Low-quality    | Genome-fragment | 18.91 | 0     |
| 55_vs_k141_92164  full     | 6761  | No  |      | 0  | 1  | Low-quality    | Genome-fragment | 9.05  | 0     |
| 59_extracted_k141_68579    | 6762  | No  |      | 1  | 0  | Low-quality    | Genome-fragment | 17.47 | 0     |
| 512_vs_k141_3557  full     | 6763  | No  |      | 1  | 2  | Low-quality    | Genome-fragment | 4.71  | 0     |
| 516_extracted_31333        | 6764  | No  |      | 0  | 3  | Low-quality    | Genome-fragment | 9.13  | 0     |
| 57_vs_33055  full          | 6767  | No  |      | 3  | 0  | Low-quality    | Genome-fragment | 15.72 | 0     |
| 56_vs_k141_18422  full     | 3024  | No  |      | 0  | 2  | Not-determined | Genome-fragment | NA    | 0     |
| 56_vs_k141_25837  full     | 29837 | No  |      | 15 | 0  | Medium-quality | Genome-fragment | 72.51 | 0     |
| 53_vs_k141_2561  full      | 6779  |     |      |    |    |                |                 |       |       |



|                           |       |     |       |    |    |                |                 |       |       |
|---------------------------|-------|-----|-------|----|----|----------------|-----------------|-------|-------|
| 57_vs_40202  full         | 6828  | No  | NA    | 2  | 0  | Low-quality    | Genome-fragment | 16.7  | 0     |
| 517_extracted_k141_45462  | 6829  | No  | NA    | 6  | 0  | Low-quality    | Genome-fragment | 8.34  | 0     |
| 514_extracted_k141_88586  | 6831  | No  | NA    | 4  | 0  | Low-quality    | Genome-fragment | 16.5  | 0     |
| 512_vs_k141_55445  full   | 6832  | No  | NA    | 0  | 0  | Low-quality    | Genome-fragment | 12.27 | 0     |
| 56_vs_k141_5184  full     | 3420  | No  | NA    | 0  | 2  | Not-determined | Genome-fragment | NA    | 0     |
| 56_vs_k141_42073  full    | 3368  | No  | NA    | 0  | 2  | Not-determined | Genome-fragment | NA    | 0     |
| 53_extracted_k141_72942   | 6833  | No  | NA    | 4  | 0  | Low-quality    | Genome-fragment | 3.86  | 0     |
| 513_extracted_153734      | 6846  | No  | NA    | 1  | 0  | Low-quality    | Genome-fragment | 7.26  | 0     |
| 53_extracted_k141_88388   | 6847  | No  | NA    | 2  | 1  | Low-quality    | Genome-fragment | 4.22  | 0     |
| 516_vs_134504  full       | 6847  | Yes | 5786  | 1  | 1  | Low-quality    | Genome-fragment | 9.1   | 15.5  |
| 515_extracted_9296        | 6848  | No  | NA    | 2  | 0  | Low-quality    | Genome-fragment | 11.22 | 0     |
| 56_vs_k141_46739  full    | 2599  | No  | NA    | 0  | 0  | Not-determined | Genome-fragment | NA    | 0     |
| 56_vs_k141_32519  full    | 2086  | No  | NA    | 0  | 0  | Not-determined | Genome-fragment | NA    | 0     |
| 515_vs_66020  full        | 6849  | Yes | 6612  | 1  | 1  | Low-quality    | Genome-fragment | 5.35  | 3.46  |
| 56_vs_k141_51789  full    | 1187  | No  | NA    | 0  | 0  | Not-determined | Genome-fragment | NA    | 0     |
| 56_vs_k141_4670  full     | 2047  | No  | NA    | 0  | 0  | Not-determined | Genome-fragment | NA    | 0     |
| 56_vs_k141_42198  full    | 1653  | No  | NA    | 0  | 2  | Not-determined | Genome-fragment | NA    | 0     |
| 56_vs_k141_43900  full    | 2789  | No  | NA    | 0  | 1  | Not-determined | Genome-fragment | NA    | 0     |
| 513_vs_83238  full        | 6850  | No  | NA    | 4  | 0  | Low-quality    | Genome-fragment | 14.63 | 0     |
| 53_extracted_k141_20202   | 6852  | No  | NA    | 4  | 0  | Low-quality    | Genome-fragment | 9.36  | 0     |
| 56_vs_k141_4681  full     | 43497 | No  | NA    | 0  | 14 | Not-determined | Genome-fragment | NA    | 0     |
| 56_vs_k141_13587  full    | 6853  | No  | NA    | 0  | 3  | Low-quality    | Genome-fragment | 5.23  | 0     |
| 56_vs_k141_25201  full    | 6858  | No  | NA    | 0  | 1  | Low-quality    | Genome-fragment | 6.2   | 0     |
| 56_vs_k141_30301  full    | 1676  | No  | NA    | 0  | 0  | Not-determined | Genome-fragment | NA    | 0     |
| 56_vs_k141_53852  full    | 2520  | No  | NA    | 0  | 3  | Not-determined | Genome-fragment | NA    | 0     |
| 516_vs_104036  full       | 6861  | No  | NA    | 1  | 0  | Low-quality    | Genome-fragment | 4.27  | 0     |
| 53_extracted_k141_72522   | 6864  | No  | NA    | 2  | 0  | Low-quality    | Genome-fragment | 7.08  | 0     |
| 56_vs_k141_50126  full    | 6864  | No  | NA    | 4  | 0  | Low-quality    | Genome-fragment | 12.02 | 0     |
| 516_vs_38804  full        | 6865  | No  | NA    | 0  | 0  | Low-quality    | Genome-fragment | 20.5  | 0     |
| 510_vs_13792  full        | 6872  | No  | NA    | 5  | 0  | Low-quality    | Genome-fragment | 13.13 | 0     |
| 58_vs_k141_166104  full   | 6872  | No  | NA    | 2  | 0  | Low-quality    | Genome-fragment | 15.79 | 0     |
| 56_vs_k141_22992  full    | 1516  | No  | NA    | 0  | 1  | Not-determined | Genome-fragment | NA    | 0     |
| 51_extracted_k141_93977   | 6875  | No  | NA    | 7  | 0  | Low-quality    | Genome-fragment | 11.17 | 0     |
| 56_vs_k141_11300  full    | 1274  | No  | NA    | 0  | 1  | Not-determined | Genome-fragment | NA    | 0     |
| 517_vs_k141_119727  full  | 6876  | No  | NA    | 2  | 0  | Low-quality    | Genome-fragment | 12.58 | 0     |
| 51_vs_k141_20023  full    | 6876  | No  | NA    | 0  | 0  | Low-quality    | Genome-fragment | 16.07 | 0     |
| 56_vs_k141_16196  full    | 1171  | No  | NA    | 0  | 1  | Not-determined | Genome-fragment | NA    | 0     |
| 56_vs_k141_12710  full    | 1226  | No  | NA    | 0  | 0  | Not-determined | Genome-fragment | NA    | 0     |
| 56_vs_k141_1784  full     | 2723  | No  | NA    | 1  | 1  | Not-determined | Genome-fragment | NA    | 0     |
| 56_vs_k141_48617  full    | 3445  | No  | NA    | 0  | 2  | Not-determined | Genome-fragment | NA    | 0     |
| 58_extracted_k141_28813   | 6882  | No  | NA    | 4  | 0  | Low-quality    | Genome-fragment | 11.5  | 0     |
| 511_extracted_k141_95929  | 6883  | No  | NA    | 0  | 1  | Low-quality    | Genome-fragment | 12.15 | 0     |
| 56_vs_k141_44032  full    | 3548  | No  | NA    | 0  | 3  | Not-determined | Genome-fragment | NA    | 0     |
| 516_extracted_45537       | 6883  | No  | NA    | 0  | 0  | Low-quality    | Genome-fragment | 10.65 | 0     |
| 56_vs_k141_5555  full     | 4451  | No  | NA    | 0  | 3  | Not-determined | Genome-fragment | NA    | 0     |
| 56_vs_k141_27548  full    | 1300  | No  | NA    | 0  | 0  | Not-determined | Genome-fragment | NA    | 0     |
| 58_extracted_k141_131854  | 6896  | No  | NA    | 4  | 0  | Low-quality    | Genome-fragment | 13.83 | 0     |
| 56_vs_k141_16174  full    | 6900  | No  | NA    | 0  | 0  | Low-quality    | Genome-fragment | 11.51 | 0     |
| 57_vs_89489  full         | 6901  | No  | NA    | 2  | 0  | Low-quality    | Genome-fragment | 5.61  | 0     |
| 59_vs_k141_31931  full    | 6902  | No  | NA    | 0  | 2  | Low-quality    | Genome-fragment | 12.75 | 0     |
| 56_vs_k141_42412  full    | 6682  | No  | NA    | 0  | 7  | Not-determined | Genome-fragment | NA    | 0     |
| 56_vs_k141_44070  full    | 38695 | No  | NA    | 11 | 0  | Low-quality    | Genome-fragment | 51.55 | 0     |
| 56_vs_k141_48702  full    | 2809  | No  | NA    | 0  | 1  | Not-determined | Genome-fragment | NA    | 0     |
| 56_vs_k141_36886  full    | 2463  | No  | NA    | 0  | 1  | Not-determined | Genome-fragment | NA    | 0     |
| 52_vs_k141_3987  full     | 6907  | No  | NA    | 0  | 5  | Low-quality    | Genome-fragment | 5.6   | 0     |
| 516_extracted_89867       | 6909  | No  | NA    | 0  | 0  | Low-quality    | Genome-fragment | 16.28 | 0     |
| 56_vs_k141_53966  full    | 28962 | Yes | 24133 | 14 | 2  | Medium-quality | Genome-fragment | 68.8  | 16.67 |
| 56_vs_k141_12856  full    | 1452  | No  | NA    | 0  | 0  | Not-determined | Genome-fragment | NA    | 0     |
| 56_vs_k141_30418  full    | 2618  | No  | NA    | 0  | 1  | Not-determined | Genome-fragment | NA    | 0     |
| 56_vs_k141_44161  full    | 1165  | No  | NA    | 0  | 1  | Not-determined | Genome-fragment | NA    | 0     |
| 56_vs_k141_8926  full     | 3578  | No  | NA    | 0  | 0  | Not-determined | Genome-fragment | NA    | 0     |
| 57_vs_78677  full         | 6910  | Yes | 4947  | 1  | 1  | Low-quality    | Genome-fragment | 11.34 | 28.41 |
| 516_vs_54822  full        | 6918  | No  | NA    | 0  | 0  | Low-quality    | Genome-fragment | 6.28  | 0     |
| 56_vs_k141_49756  full    | 6921  | No  | NA    | 5  | 0  | Low-quality    | Genome-fragment | 13.45 | 0     |
| 58_extracted_k141_63908   | 6925  | No  | NA    | 0  | 1  | Low-quality    | Genome-fragment | 11.62 | 0     |
| 55_extracted_k141_47398   | 6931  | No  | NA    | 2  | 0  | Low-quality    | Genome-fragment | 10.86 | 0     |
| 514_extracted_k141_60174  | 6932  | No  | NA    | 6  | 0  | Low-quality    | Genome-fragment | 15.58 | 0     |
| 56_vs_k141_21211  full    | 2218  | No  | NA    | 0  | 0  | Not-determined | Genome-fragment | NA    | 0     |
| 56_vs_k141_15318  full    | 1103  | No  | NA    | 0  | 1  | Not-determined | Genome-fragment | NA    | 0     |
| 56_vs_k141_27633  full    | 1843  | No  | NA    | 0  | 1  | Not-determined | Genome-fragment | NA    | 0     |
| 56_vs_k141_20357  full    | 4350  | No  | NA    | 0  | 3  | Not-determined | Genome-fragment | NA    | 0     |
| 56_vs_k141_48762  full    | 3519  | No  | NA    | 0  | 1  | Not-determined | Genome-fragment | NA    | 0     |
| 55_extracted_k141_93625   | 6933  | No  | NA    | 1  | 1  | Low-quality    | Genome-fragment | 3.76  | 0     |
| 57_extracted_47191        | 6934  | No  | NA    | 2  | 0  | Low-quality    | Genome-fragment | 10.91 | 0     |
| 52_extracted_k141_21225   | 6938  | No  | NA    | 2  | 0  | Low-quality    | Genome-fragment | 20.52 | 0     |
| 57_extracted_67566        | 6939  | No  | NA    | 4  | 0  | Low-quality    | Genome-fragment | 18.26 | 0     |
| 56_vs_k141_35337  full    | 1828  | No  | NA    | 0  | 2  | Not-determined | Genome-fragment | NA    | 0     |
| 516_extracted_11702       | 6939  | No  | NA    | 3  | 0  | Low-quality    | Genome-fragment | 6.9   | 0     |
| 53_extracted_k141_98315   | 6943  | No  | NA    | 0  | 0  | Low-quality    | Genome-fragment | 15.37 | 0     |
| 510_vs_92185  full        | 6947  | No  | NA    | 3  | 0  | Low-quality    | Genome-fragment | 12.56 | 0     |
| 512_vs_k141_22875  full   | 6953  | No  | NA    | 5  | 0  | Low-quality    | Genome-fragment | 15.45 | 0     |
| 56_vs_k141_15315  full    | 4005  | No  | NA    | 4  | 0  | Not-determined | Genome-fragment | NA    | 0     |
| 56_vs_k141_27679  full    | 1195  | No  | NA    | 0  | 0  | Not-determined | Genome-fragment | NA    | 0     |
| 56_vs_k141_23319  full    | 1744  | No  | NA    | 0  | 2  | Not-determined | Genome-fragment | NA    | 0     |
| 56_vs_k141_11539  full    | 1463  | No  | NA    | 0  | 1  | Not-determined | Genome-fragment | NA    | 0     |
| 56_vs_k141_25272  full    | 2397  | No  | NA    | 0  | 2  | Not-determined | Genome-fragment | NA    | 0     |
| 517_vs_k141_94000  full   | 6954  | No  | NA    | 0  | 0  | Low-quality    | Genome-fragment | 17.24 | 0     |
| 54_vs_VitSore_23346-cat_1 | 6958  | No  | NA    | 6  | 0  | Low-quality    | Genome-fragment | 17.29 | 0     |
| 56_vs_k141_11588  full    | 1108  | No  | NA    | 0  | 0  | Not-determined | Genome-fragment | NA    | 0     |
| 53_vs_k141_94290  full    | 6966  | No  | NA    | 3  | 0  | Low-quality    | Genome-fragment | 4.93  | 0     |
| 54_extracted_17822        | 6968  | No  | NA    | 16 | 0  | Low-quality    | Genome-fragment | 22.92 | 0     |
| 56_vs_k141_11636  full    | 1740  | No  | NA    | 0  | 0  | Not-determined | Genome-fragment | NA    | 0     |
| 57_vs_136273  full        | 6969  | No  | NA    | 0  | 0  | Low-quality    | Genome-fragment | 11.93 | 0     |
| 56_vs_k141_25781  full    | 1107  | No  | NA    | 0  | 1  | Not-determined | Genome-fragment | NA    | 0     |
| 516_extracted_66409       | 6970  | No  | NA    | 4  | 0  | Low-quality    | Genome-fragment | 1.03  | 0     |
| 57_vs_80530  full         | 6971  | No  | NA    | 3  | 0  | Low-quality    | Genome-fragment | 16.79 | 0     |
| 56_vs_k141_23448  full    | 6095  | No  | NA    | 0  | 1  | Not-determined | Genome-fragment | NA    | 0     |
| 56_vs_k141_24541  full    | 4530  | No  | NA    | 0  | 3  | Not-determined | Genome-fragment | NA    | 0     |
| 56_vs_k141_39749  full    | 1176  | No  | NA    | 0  | 0  | Not-determined | Genome-fragment | NA    | 0     |
| 512_vs_k141_30761  full   | 6971  | No  | NA    | 0  | 6  | Low-quality    | Genome-fragment | 3.03  | 0     |
| 514_extracted_k141_46727  | 6975  | No  | NA    | 8  | 1  | Low-quality    | Genome-fragment | 20.12 | 0     |
| 514_vs_k141_36999  full   | 6975  | No  | NA    | 2  | 0  | Low-quality    | Genome-fragment | 15.92 | 0     |
| 53_extracted_k141_107246  | 6976  | No  | NA    | 8  | 0  | Low-quality    | Genome-fragment | 16.42 | 0     |
| 56_vs_k141_1832  full     | 12039 | No  | NA    | 0  | 2  | Not-determined | Genome-fragment | NA    | 0     |
| 51_extracted_k141_59422   | 6977  | No  | NA    | 0  | 1  | Low-quality    | Genome-fragment | 47.74 | 0     |
| 517_vs_k141_60173  full   | 6978  | No  | NA    | 3  | 0  | Low-quality    | Genome-fragment | 12.78 | 0     |
| 512_extracted_k141_7278   | 6979  | No  | NA    | 1  | 0  | Low-quality    | Genome-fragment | 11.91 | 0     |
| 514_extracted_k141_12634  | 6982  | No  | NA    | 1  | 1  | Low-quality    | Genome-fragment | 3.79  | 0     |
| 56_vs_k141_8970  full     | 1561  | No  | NA    | 0  | 2  | Not-determined | Genome-fragment | NA    | 0     |
| 56_vs_k141_23540  full    | 2510  | No  | NA    | 0  | 2  | Not-determined | Genome-fragment | NA    | 0     |
| 55_extracted_k141_148884  | 6983  | No  | NA    | 3  | 0  | Low-quality    | Genome-fragment | 16.23 | 0     |
| 54_extracted_9974         | 6983  | No  | NA    | 11 | 0  | Low-quality    | Genome-fragment | 22.85 | 0     |
| 514_vs_k141_31040  full   | 6995  | No  | NA    | 0  | 3  | Low-quality    | Genome-fragment | 5.71  | 0     |
| 56_vs_k141_49065  full    | 1049  | No  | NA    | 0  | 1  | Not-determined | Genome-fragment | NA    | 0     |
| 59_extracted_k141_72175   | 6996  | No  | NA    | 0  | 0  | Low-quality    | Genome-fragment | 4.03  | 0     |
| 516_vs_82179  full        | 7001  | No  | NA    | 4  | 0  | Low-quality    | Genome-fragment | 12.07 | 0     |
| 513_vs_42284  full        | 7004  | No  | NA    | 2  | 0  | Low-quality    | Genome-fragment | 3.14  | 0     |
| 55_vs_k141_177782  full   | 7004  | Yes | 4793  | 1  | 1  | Low-quality    | Genome-fragment | 5.23  | 31.57 |
| 514_vs_k141_108427  full  | 7011  | No  | NA    | 1  | 0  | Low-quality    | Genome-fragment | 14.23 | 0     |
| 55_vs_k141_36680  full    | 7012  | No  | NA    | 0  | 0  | Low-quality    | Genome-fragment | 17.52 | 0     |
| 57_vs_28305  full         | 7012  | No  | NA    | 0  | 0  | Low-quality    | Genome-fragment | 4.6   | 0     |
| 54_extracted_2064         | 7012  | No  | NA    | 11 | 0  | Low-quality    | Genome-fragment | 22.13 | 0     |
| 511_extracted_k141_6303   | 7016  | No  | NA    | 7  | 0  | Low-quality    | Genome-fragment | 18.62 | 0     |
| 517_extracted_k141_122173 | 1706  | No  | NA    | 0  | 3  | Not-determined | Genome-fragment | NA    | 0     |
| 56_vs_k141_55911  full    | 7019  | No  | NA    | 0  | 4  | Low-quality    | Genome-fragment | 7.74  | 0     |
| 514_extracted_k141_51296  | 1790  | No  | NA    | 0  | 2  | Not-determined | Genome-fragment | NA    | 0     |
| 510_extracted_71229       | 7022  | No  | NA    | 2  | 1  | Low-quality    | Genome-fragment | 11.37 | 0     |
| 54_extracted_30836        | 7026  | No  | NA    | 1  | 0  | Low-quality    | Genome-fragment | 11.43 | 0     |
| 56_vs_k141_2139  full     | 7028  | Yes | 4824  | 1  | 1  | Low-quality    | Genome-fragment | 11.95 | 31.36 |
| 56_vs_k141_2300  full     | 2618  | No  | NA    | 0  | 2  | Not-determined | Genome-fragment | NA    | 0     |
| 57_extracted_21498        | 2006  | No  | NA    | 0  | 2  | Not-determined | Genome-fragment | NA    | 0     |
| 56_vs_k141_9349  full     | 7030  | No  | NA    | 1  | 0  | Low-quality    | Genome-fragment | 11.06 | 0     |
| 56_vs_k141_47055  full    | 2849  | No  | NA    | 0  | 1  | Not-determined | Genome-fragment | NA    | 0     |
| 56_vs_k141_20622  full    | 1372  | No  | NA    | 0  | 1  | Not-determined | Genome-fragment | NA    | 0     |
| 57_extracted_108653       | 4003  | No  | NA    | 0  | 1  | Not-determined | Genome-fragment | NA    | 0     |
| 54_extracted_8544         | 7031  | No  | NA    | 0  | 3  | Low-quality    | Genome-fragment | 2.98  | 0     |
| 55_vs_k141_9598  full     | 7032  | No  | NA    | 9  | 0  | Low-quality    | Genome-fragment | 23.21 | 0     |
| 56_vs_k141_44648  full    | 7034  | No  | NA    | 0  | 0  | Low-quality    | Genome-fragment | 20.38 | 0     |
| 56_vs_k141_37485  full    | 1043  | No  | NA    | 0  | 1  | Not-determined | Genome-fragment | NA    | 0     |
| 56_vs_k141_49444  full    | 2921  | No  | NA    | 0  | 1  | Not-determined | Genome-fragment | NA    | 0     |
| 513_extracted_31389       | 31632 | No  | NA    | 0  | 18 | Not-determined | Genome-fragment | NA    | 0     |
| 56_vs_k141_49458  full    | 7038  | No  | NA    | 0  | 4  | Low-quality    | Genome-fragment | 2.54  | 0     |
| 56_vs_k141_5              |       |     |       |    |    |                |                 |       |       |



|                             |       |     |       |   |                |                 |       |       |
|-----------------------------|-------|-----|-------|---|----------------|-----------------|-------|-------|
| 514_vs_k141_103105  full    | 7066  | NA  | 1     | 1 | Low-quality    | Genome-fragment | 19.2  | 0     |
| 55_vs_k141_10908  0_partial | 17302 | NA  | 0     | 3 | Not-determined | Genome-fragment | NA    | 0     |
| 56_vs_k141_55084  0_partial | 21437 | NA  | 0     | 7 | Not-determined | Genome-fragment | NA    | 0     |
| 56_vs_k141_39065  0_partial | 47509 | Yes | 29537 | 5 | Medium-quality | Genome-fragment | 66.32 | 37.83 |
| 56_vs_k141_1504  0_partial  | 12430 | NA  | 0     | 0 | Not-determined | Genome-fragment | NA    | 0     |
| 53_vs_k141_60843  full      | 7058  | NA  | 3     | 0 | Low-quality    | Genome-fragment | 11.11 | 0     |
| 56_vs_k141_39286  0_partial | 15247 | NA  | 0     | 0 | Not-determined | Genome-fragment | NA    | 0     |
| 56_vs_k141_30297  0_partial | 20627 | NA  | 0     | 0 | Not-determined | Genome-fragment | NA    | 0     |
| 56_vs_k141_55570  0_partial | 13784 | NA  | 0     | 0 | Not-determined | Genome-fragment | NA    | 0     |
| 516_extracted_172136        | 7068  | NA  | 3     | 0 | Low-quality    | Genome-fragment | 15.34 | 0     |
| 58_vs_k141_17846  full      | 7068  | NA  | 0     | 0 | Low-quality    | Genome-fragment | 1.99  | 0     |
| 57_extracted_56712          | 7087  | NA  | 1     | 1 | Low-quality    | Genome-fragment | 8.98  | 0     |
| 510_extracted_119210        | 7088  | NA  | 0     | 0 | Low-quality    | Genome-fragment | 3.81  | 0     |
| 58_extracted_k141_40966     | 7089  | NA  | 6     | 0 | Low-quality    | Genome-fragment | 16.08 | 0     |
| 517_vs_k141_118848  full    | 7091  | NA  | 3     | 0 | Low-quality    | Genome-fragment | 19.81 | 0     |
| 512_vs_k141_131127  full    | 7095  | NA  | 0     | 0 | Not-determined | Genome-fragment | 6.82  | 0     |
| 55_extracted_k141_34419     | 7099  | NA  | 0     | 0 | Low-quality    | Genome-fragment | 5.71  | 0     |
| 56_vs_k141_3028  H2gene     | 1312  | NA  | 0     | 1 | Not-determined | Genome-fragment | NA    | 12.65 |
| 516_extracted_2704          | 7107  | NA  | 0     | 1 | Low-quality    | Genome-fragment | NA    | 0     |
| 56_vs_k141_26340  H2gene    | 1800  | NA  | 0     | 0 | Not-determined | Genome-fragment | NA    | 0     |
| 56_vs_k141_3584  H2gene     | 1509  | NA  | 0     | 1 | Not-determined | Genome-fragment | NA    | 0     |
| 510_vs_85685  full          | 7108  | NA  | 1     | 0 | Low-quality    | Genome-fragment | 18.64 | 0     |
| 515_extracted_7427          | 7113  | NA  | 2     | 0 | Low-quality    | Genome-fragment | 4.07  | 0     |
| 56_vs_k141_36110  H2gene    | 1487  | NA  | 0     | 1 | Not-determined | Genome-fragment | NA    | 0     |
| 56_vs_k141_26554  H2gene    | 1698  | NA  | 0     | 0 | Not-determined | Genome-fragment | NA    | 0     |
| 56_vs_k141_12855  H2gene    | 1317  | NA  | 0     | 2 | Low-quality    | Genome-fragment | NA    | 0     |
| 59_extracted_k141_56789     | 7116  | NA  | 4     | 2 | Low-quality    | Genome-fragment | 11.86 | 0     |
| 56_vs_k141_38872  H2gene    | 1081  | NA  | 0     | 0 | Not-determined | Genome-fragment | NA    | 0     |
| 53_extracted_k141_54199     | 7119  | NA  | 6     | 1 | Low-quality    | Genome-fragment | 1.08  | 0     |
| 512_extracted_k141_136418   | 7120  | NA  | 5     | 0 | Low-quality    | Genome-fragment | 18.53 | 0     |
| 511_vs_k141_7863  full      | 7122  | NA  | 2     | 0 | Low-quality    | Genome-fragment | 7.57  | 0     |
| 53_vs_k141_38628  full      | 7123  | NA  | 0     | 0 | Low-quality    | Genome-fragment | 20.71 | 0     |
| 56_vs_k141_19599  H2gene    | 2285  | NA  | 0     | 0 | Not-determined | Genome-fragment | NA    | 0     |
| 53_vs_k141_105108  full     | 7123  | NA  | 3     | 0 | Low-quality    | Genome-fragment | 8.46  | 0     |
| 516_vs_31494  full          | 7124  | NA  | 5     | 0 | Low-quality    | Genome-fragment | 13.27 | 0     |
| 56_vs_k141_12000  H2gene    | 1110  | NA  | 1     | 1 | Not-determined | Genome-fragment | NA    | 0     |
| 56_vs_k141_41674  H2gene    | 1032  | NA  | 0     | 0 | Not-determined | Genome-fragment | NA    | 0     |
| 510_vs_38642  full          | 7131  | NA  | 3     | 0 | Low-quality    | Genome-fragment | 11.95 | 0     |
| 51_extracted_k141_141358    | 7138  | NA  | 1     | 1 | Low-quality    | Genome-fragment | 12.46 | 0     |
| 52_vs_k141_11805  full      | 7144  | NA  | 0     | 2 | Low-quality    | Genome-fragment | 15.53 | 0     |
| 52_vs_k141_17520  full      | 7144  | NA  | 2     | 0 | Low-quality    | Genome-fragment | 17.54 | 0     |
| 511_extracted_k141_1095     | 7150  | NA  | 0     | 0 | Low-quality    | Genome-fragment | 16.83 | 0     |
| 56_vs_k141_30284  H2gene    | 1469  | NA  | 0     | 1 | Not-determined | Genome-fragment | NA    | 0     |
| 517_extracted_k141_4926     | 7152  | NA  | 1     | 0 | Low-quality    | Genome-fragment | 3.51  | 0     |
| 516_vs_172744  full         | 7152  | NA  | 2     | 0 | Low-quality    | Genome-fragment | 8.31  | 0     |
| 53_extracted_k141_1127398   | 7153  | NA  | 0     | 0 | Low-quality    | Genome-fragment | 12.32 | 0     |
| 514_vs_k141_94258  full     | 7164  | NA  | 0     | 0 | Low-quality    | Genome-fragment | 6.25  | 0     |
| 55_vs_k141_15262  full      | 7164  | NA  | 10    | 0 | Low-quality    | Genome-fragment | 19.31 | 0     |
| 53_extracted_k141_69458     | 7165  | NA  | 0     | 0 | Low-quality    | Genome-fragment | 5.48  | 0     |
| 57_vs_58551  full           | 7170  | NA  | 0     | 0 | Low-quality    | Genome-fragment | 15.08 | 0     |
| 516_vs_3041  full           | 7174  | NA  | 0     | 0 | Low-quality    | Genome-fragment | 8.59  | 0     |
| 51_extracted_k141_58237     | 7176  | NA  | 0     | 0 | Low-quality    | Genome-fragment | 20.22 | 0     |
| 58_vs_k141_174928  full     | 7177  | NA  | 1     | 0 | Low-quality    | Genome-fragment | 11.86 | 0     |
| 58_extracted_k141_164873    | 1599  | NA  | 0     | 0 | Not-determined | Genome-fragment | NA    | 0     |
| 58_extracted_k141_17358     | 1006  | NA  | 0     | 0 | Not-determined | Genome-fragment | NA    | 0     |
| 58_extracted_k141_80748     | 2232  | NA  | 0     | 2 | Not-determined | Genome-fragment | NA    | 0     |
| 58_extracted_k141_78109     | 1083  | NA  | 0     | 2 | Not-determined | Genome-fragment | NA    | 0     |
| 58_extracted_k141_156204    | 1210  | NA  | 0     | 0 | Not-determined | Genome-fragment | NA    | 0     |
| 517_vs_k141_101004  full    | 7179  | NA  | 0     | 0 | Low-quality    | Genome-fragment | 11.8  | 0     |
| 58_extracted_k141_17366     | 2959  | NA  | 0     | 1 | Not-determined | Genome-fragment | NA    | 0     |
| 58_extracted_k141_190921    | 3222  | NA  | 0     | 3 | Not-determined | Genome-fragment | NA    | 0     |
| 516_vs_122308  full         | 7180  | NA  | 0     | 1 | Low-quality    | Genome-fragment | 2.23  | 0     |
| 58_extracted_k141_173561    | 2966  | NA  | 0     | 0 | Not-determined | Genome-fragment | NA    | 0     |
| 58_extracted_k141_156216    | 2914  | NA  | 0     | 0 | Not-determined | Genome-fragment | NA    | 0     |
| 58_extracted_k141_121500    | 1179  | NA  | 0     | 0 | Not-determined | Genome-fragment | NA    | 0     |
| 58_extracted_k141_104151    | 7599  | NA  | 0     | 3 | Not-determined | Genome-fragment | NA    | 0     |
| 510_vs_11101  full          | 7181  | NA  | 0     | 7 | Low-quality    | Genome-fragment | 2.02  | 0     |
| 58_extracted_k141_69447     | 1065  | NA  | 0     | 1 | Not-determined | Genome-fragment | NA    | 0     |
| 58_extracted_k141_86808     | 2518  | NA  | 0     | 2 | Not-determined | Genome-fragment | NA    | 0     |
| 58_extracted_k141_182253    | 1132  | NA  | 0     | 0 | Not-determined | Genome-fragment | NA    | 0     |
| 58_extracted_k141_188864    | 2454  | NA  | 0     | 1 | Not-determined | Genome-fragment | NA    | 0     |
| 58_extracted_k141_41422     | 2003  | NA  | 0     | 1 | Not-determined | Genome-fragment | NA    | 0     |
| 58_extracted_k141_182262    | 1054  | NA  | 0     | 2 | Not-determined | Genome-fragment | NA    | 0     |
| 58_extracted_k141_26079     | 5054  | NA  | 0     | 0 | Not-determined | Genome-fragment | NA    | 0     |
| 58_extracted_k141_78119     | 1044  | NA  | 0     | 0 | Not-determined | Genome-fragment | NA    | 0     |
| 517_vs_k141_78567  full     | 7185  | NA  | 0     | 0 | Low-quality    | Genome-fragment | 7.12  | 0     |
| 58_extracted_k141_43430     | 3260  | NA  | 0     | 3 | Not-determined | Genome-fragment | NA    | 0     |
| 58_extracted_k141_69462     | 3236  | NA  | 0     | 1 | Not-determined | Genome-fragment | NA    | 0     |
| 58_extracted_k141_159616    | 1100  | NA  | 0     | 1 | Not-determined | Genome-fragment | NA    | 0     |
| 53_extracted_k141_16813     | 7185  | NA  | 2     | 0 | Low-quality    | Genome-fragment | 19.02 | 0     |
| 58_extracted_k141_68001     | 1108  | NA  | 0     | 0 | Not-determined | Genome-fragment | NA    | 0     |
| 58_extracted_k141_59516     | 10416 | NA  | 0     | 0 | Not-determined | Genome-fragment | NA    | 0     |
| 58_extracted_k141_199626    | 1241  | NA  | 0     | 0 | Not-determined | Genome-fragment | NA    | 0     |
| 58_extracted_k141_26096     | 3273  | NA  | 0     | 2 | Not-determined | Genome-fragment | NA    | 0     |
| 57_vs_5446  full            | 7185  | NA  | 0     | 0 | Low-quality    | Genome-fragment | 3.65  | 0     |
| 58_extracted_k141_52120     | 10614 | NA  | 0     | 0 | Not-determined | Genome-fragment | NA    | 0     |
| 58_extracted_k141_69477     | 1142  | NA  | 0     | 0 | Not-determined | Genome-fragment | NA    | 0     |
| 58_extracted_k141_86856     | 1009  | NA  | 0     | 0 | Not-determined | Genome-fragment | NA    | 0     |
| 516_vs_39179  full          | 7185  | NA  | 0     | 0 | Low-quality    | Genome-fragment | 8.1   | 0     |
| 517_vs_k141_100596  full    | 7187  | Yes | 3260  | 1 | Low-quality    | Genome-fragment | 4.93  | 54.64 |
| 58_extracted_k141_190982    | 1258  | NA  | 0     | 2 | Not-determined | Genome-fragment | NA    | 0     |
| 58_extracted_k141_69484     | 1796  | NA  | 0     | 1 | Not-determined | Genome-fragment | NA    | 0     |
| 58_extracted_k141_60826     | 3259  | NA  | 0     | 3 | Not-determined | Genome-fragment | NA    | 0     |
| 512_vs_k141_78731  H2gene   | 7187  | NA  | 1     | 0 | Low-quality    | Genome-fragment | 11.06 | 0     |
| 58_extracted_k141_26129     | 1695  | NA  | 0     | 2 | Not-determined | Genome-fragment | NA    | 0     |
| 58_extracted_k141_110484    | 7187  | NA  | 0     | 3 | Low-quality    | Genome-fragment | 3.87  | 0     |
| 57_vs_69333  full           | 7188  | NA  | 0     | 4 | Low-quality    | Genome-fragment | 1.41  | 0     |
| 58_extracted_k141_8772      | 4880  | NA  | 0     | 1 | Not-determined | Genome-fragment | NA    | 0     |
| 58_extracted_k141_41483     | 7865  | NA  | 0     | 0 | Medium-quality | Genome-fragment | 53.03 | 0     |
| 58_extracted_k141_147623    | 7189  | NA  | 0     | 1 | Not-determined | Genome-fragment | NA    | 0     |
| 55_vs_k141_134340  full     | 7193  | NA  | 2     | 0 | Low-quality    | Genome-fragment | 17.87 | 0     |
| 51_vs_k141_89615  full      | 7197  | NA  | 0     | 1 | Low-quality    | Genome-fragment | 12.83 | 0     |
| 58_extracted_k141_95539     | 1060  | NA  | 0     | 1 | Not-determined | Genome-fragment | NA    | 0     |
| 58_extracted_k141_164966    | 1409  | NA  | 0     | 2 | Not-determined | Genome-fragment | NA    | 0     |
| 58_extracted_k141_78193     | 1305  | NA  | 0     | 1 | Not-determined | Genome-fragment | NA    | 0     |
| 58_extracted_k141_78194     | 1206  | NA  | 0     | 1 | Not-determined | Genome-fragment | NA    | 0     |
| 516_extracted_119882        | 7197  | Yes | 5028  | 3 | Low-quality    | Genome-fragment | 4.06  | 30.14 |
| 58_extracted_k141_121601    | 1058  | NA  | 0     | 1 | Not-determined | Genome-fragment | NA    | 0     |
| 510_extracted_52180         | 7197  | NA  | 0     | 0 | Low-quality    | Genome-fragment | 39.61 | 0     |
| 58_extracted_k141_34793     | 1483  | NA  | 0     | 0 | Not-determined | Genome-fragment | NA    | 0     |
| 58_extracted_k141_121604    | 6195  | NA  | 0     | 4 | Not-determined | Genome-fragment | NA    | 0     |
| 58_extracted_k141_34802     | 4239  | NA  | 0     | 0 | Not-determined | Genome-fragment | NA    | 0     |
| 58_extracted_k141_147666    | 1973  | NA  | 0     | 0 | Not-determined | Genome-fragment | NA    | 0     |
| 58_extracted_k141_104242    | 2342  | NA  | 0     | 0 | Not-determined | Genome-fragment | NA    | 0     |
| 58_extracted_k141_156341    | 2123  | NA  | 0     | 1 | Not-determined | Genome-fragment | NA    | 0     |
| 58_extracted_k141_104244    | 2323  | NA  | 0     | 0 | Not-determined | Genome-fragment | NA    | 0     |
| 58_extracted_k141_8813      | 1126  | NA  | 0     | 1 | Not-determined | Genome-fragment | NA    | 0     |
| 58_extracted_k141_156347    | 3294  | NA  | 0     | 3 | Not-determined | Genome-fragment | NA    | 0     |
| 58_extracted_k141_168       | 1395  | NA  | 0     | 1 | Not-determined | Genome-fragment | NA    | 0     |
| 58_extracted_k141_138976    | 3474  | NA  | 0     | 2 | Not-determined | Genome-fragment | NA    | 0     |
| 58_extracted_k141_138978    | 1223  | NA  | 0     | 0 | Not-determined | Genome-fragment | NA    | 0     |
| 58_extracted_k141_111613    | 1304  | NA  | 0     | 1 | Not-determined | Genome-fragment | NA    | 0     |
| 58_extracted_k141_173660    | 1062  | NA  | 0     | 0 | Not-determined | Genome-fragment | NA    | 0     |
| 58_extracted_k141_86972     | 1321  | NA  | 0     | 0 | Not-determined | Genome-fragment | NA    | 0     |
| 58_extracted_k141_52100     | 3373  | NA  | 0     | 1 | Not-determined | Genome-fragment | NA    | 0     |
| 58_extracted_k141_199710    | 4892  | NA  | 0     | 2 | Not-determined | Genome-fragment | NA    | 0     |
| 59_vs_k141_29457  full      | 7199  | NA  | 2     | 0 | Low-quality    | Genome-fragment | 15.61 | 0     |
| 58_extracted_k141_173667    | 1546  | NA  | 0     | 1 | Not-determined | Genome-fragment | NA    | 0     |
| 55_vs_k141_2564  full       | 7206  | NA  | 1     | 0 | Low-quality    | Genome-fragment | 17.3  | 0     |
| 58_extracted_k141_78258     | 1338  | NA  | 0     | 1 | Not-determined | Genome-fragment | NA    | 0     |
| 58_extracted_k141_17490     | 2476  | NA  | 0     | 2 | Not-determined | Genome-fragment | NA    | 0     |
| 58_extracted_k141_26231     | 4241  | NA  | 0     | 0 | Not-determined | Genome-fragment | NA    | 0     |
| 58_extracted_k141_86997     | 2449  | NA  | 0     | 2 | Not-determined | Genome-fragment | NA    | 0     |
| 58_extracted_k141_8849      | 2441  | NA  | 0     | 0 | Not-determined | Genome-fragment | NA    | 0     |
| 512_vs_k141_5781  full      | 7208  | NA  | 0     | 0 | Low-quality    | Genome-fragment | 17.34 | 0     |
| 511_vs_k141_98490  full     | 7211  | NA  | 3     | 0 | Low-quality    | Genome-fragment | 12.43 | 0     |
| 58_extracted_k141_121993    | 3356  | NA  | 0     | 4 | Not-determined | Genome-fragment | NA    | 0     |
| 58_extracted_k141_87017     | 1304  | NA  | 0     | 1 | Not-determined | Genome-fragment | NA    | 0     |
| 58_extracted_k141_43538     | 3835  | NA  | 0     | 1 | Not-determined | Genome-fragment | NA    | 0     |
| 58_extracted_k141_52222     | 3779  | NA  | 0     | 3 | Not-determined | Genome-fragment | NA    | 0     |
| 58_extracted_k141_43546     | 1259  | NA  | 0     | 1 | Not-determined | Genome-fragment | NA    | 0     |
| 58_extracted_k141_119012    | 1233  | NA  | 0     | 1 | Not-determined | Genome-fragment | NA    | 0     |
| 58_extracted_k141_34879     | 5091  | NA  | 0     | 5 | Not-determined | Genome-fragment | NA    | 0     |
| 58_extracted_k141_43551     | 1378  | NA  | 0     | 0 | Not-determined | Genome-fragment | NA    | 0     |
| 58_extracted_k141_34882     | 1273  | NA  | 0     | 0 | Not-determined | Genome-fragment | NA    | 0     |
| 58_extracted_k141_231       | 2344  | NA  | 0     | 2 | Not-determined | Genome-fragment | NA    | 0     |
| 58_extracted_k141_121676    | 1712  | NA  | 0     | 1 | Not-determined | Genome-fragment | NA    | 0     |
| 514_extracted_k141_2706     | 7219  | NA  | 0     | 0 | Low-quality    | Genome-fragment | 17.8  | 0     |
| 58_extracted_k141_87046     | 3365  | NA  | 0     | 2 | Not-determined | Genome-fragment | NA    | 0     |
| 58_extracted_k141_69550     | 1438  | NA  | 0     | 1 | Not-determined | Genome-fragment | NA    | 0     |
| 58_extracted_k141_130316    | 1280  | NA  | 0     | 1 | Not-determined | Genome-fragment | NA    | 0     |
| 51_extracted_k141_115507    | 7225  |     |       |   |                |                 |       |       |



|                           |       |     |    |      |   |                |                 |    |       |       |
|---------------------------|-------|-----|----|------|---|----------------|-----------------|----|-------|-------|
| 58_extracted_k141_113079  | 1743  | No  | NA | 0    | 0 | Not-determined | Genome-fragment | NA | 0     | 0     |
| 58_extracted_k141_69614   | 1348  | No  | NA | 0    | 0 | Not-determined | Genome-fragment | NA | 0     | 0     |
| 58_extracted_k141_121759  | 1222  | No  | NA | 0    | 0 | Not-determined | Genome-fragment | NA | 0     | 0     |
| 58_extracted_k141_69618   | 1555  | No  | NA | 0    | 0 | Not-determined | Genome-fragment | NA | 0     | 0     |
| 58_extracted_k141_121763  | 1396  | No  | NA | 0    | 1 | Not-determined | Genome-fragment | NA | 0     | 0     |
| 58_extracted_k141_3128    | 3120  | No  | NA | 0    | 2 | Not-determined | Genome-fragment | NA | 0     | 0     |
| 58_extracted_k141_156645  | 6193  | No  | NA | 0    | 2 | Not-determined | Genome-fragment | NA | 0     | 0     |
| 58_extracted_k141_130429  | 1606  | No  | NA | 0    | 1 | Not-determined | Genome-fragment | NA | 0     | 0     |
| 58_extracted_k141_104328  | 1064  | No  | NA | 0    | 0 | Not-determined | Genome-fragment | NA | 0     | 0     |
| 58_extracted_k141_165135  | 3270  | No  | NA | 0    | 1 | Not-determined | Genome-fragment | NA | 0     | 0     |
| 58_extracted_k141_69633   | 1215  | No  | NA | 0    | 1 | Not-determined | Genome-fragment | NA | 0     | 0     |
| 58_extracted_k141_69638   | 1973  | No  | NA | 0    | 0 | Not-determined | Genome-fragment | NA | 0     | 0     |
| 58_extracted_k141_87151   | 10330 | No  | NA | 0    | 4 | Not-determined | Genome-fragment | NA | 0     | 0     |
| 58_extracted_k141_182359  | 8343  | No  | NA | 0    | 4 | Not-determined | Genome-fragment | NA | 0     | 0     |
| 512_vs_k141_94220[Full]   | 7236  | Yes | NA | 2296 | 1 | Low-quality    | Genome-fragment | NA | 3.47  | 68.27 |
| 58_extracted_k141_35015   | 1459  | No  | NA | 0    | 2 | Not-determined | Genome-fragment | NA | 0     | 0     |
| 58_extracted_k141_130473  | 1045  | No  | NA | 0    | 2 | Not-determined | Genome-fragment | NA | 0     | 0     |
| 58_extracted_k141_69651   | 1638  | No  | NA | 0    | 2 | Not-determined | Genome-fragment | NA | 0     | 0     |
| 517_extracted_k141_151581 | 7217  | No  | NA | 0    | 1 | Low-quality    | Genome-fragment | NA | 15.06 | 0     |
| 58_extracted_k141_173742  | 1082  | No  | NA | 0    | 1 | Not-determined | Genome-fragment | NA | 0     | 0     |
| 58_extracted_k141_156470  | 1034  | No  | NA | 0    | 0 | Not-determined | Genome-fragment | NA | 0     | 0     |
| 55_vs_k141_38031[Full]    | 7239  | No  | NA | 1    | 0 | Low-quality    | Genome-fragment | NA | 4.35  | 0     |
| 58_extracted_k141_61069   | 1169  | No  | NA | 0    | 0 | Not-determined | Genome-fragment | NA | 0     | 0     |
| 58_extracted_k141_173751  | 1077  | No  | NA | 0    | 0 | Not-determined | Genome-fragment | NA | 0     | 0     |
| 58_extracted_k141_156485  | 1063  | No  | NA | 0    | 0 | Not-determined | Genome-fragment | NA | 0     | 0     |
| 58_extracted_k141_139140  | 1059  | No  | NA | 0    | 0 | Not-determined | Genome-fragment | NA | 0     | 0     |
| 58_extracted_k141_182414  | 1523  | No  | NA | 0    | 0 | Not-determined | Genome-fragment | NA | 0     | 0     |
| 514_vs_k141_100812[Full]  | 7243  | No  | NA | 2    | 3 | Low-quality    | Genome-fragment | NA | 11.38 | 0     |
| 58_extracted_k141_87189   | 1156  | No  | NA | 0    | 0 | Not-determined | Genome-fragment | NA | 16.14 | 0     |
| 57_vs_76284[Full]         | 7244  | No  | NA | 4    | 0 | Low-quality    | Genome-fragment | NA | 16.14 | 0     |
| 58_extracted_k141_52399   | 1169  | No  | NA | 0    | 2 | Not-determined | Genome-fragment | NA | 3.93  | 0     |
| 510_extracted_7319        | 7246  | No  | NA | 1    | 0 | Low-quality    | Genome-fragment | NA | 16.59 | 0     |
| 511_vs_k141_102534[Full]  | 7247  | No  | NA | 1    | 0 | Low-quality    | Genome-fragment | NA | 0     | 0     |
| 58_extracted_k141_43673   | 5084  | No  | NA | 0    | 4 | Not-determined | Genome-fragment | NA | 0     | 0     |
| 58_extracted_k141_78437   | 1213  | No  | NA | 0    | 0 | Not-determined | Genome-fragment | NA | 17.54 | 0     |
| 57_vs_3521[Full]          | 7251  | No  | NA | 0    | 0 | Low-quality    | Genome-fragment | NA | 0     | 0     |
| 58_extracted_k141_199849  | 4314  | No  | NA | 0    | 1 | Not-determined | Genome-fragment | NA | 0     | 0     |
| 58_extracted_k141_173789  | 1917  | No  | NA | 0    | 1 | Not-determined | Genome-fragment | NA | 0     | 0     |
| 58_extracted_k141_113160  | 2611  | No  | NA | 0    | 1 | Not-determined | Genome-fragment | NA | 23.89 | 0     |
| 54_extracted_7325         | 7252  | No  | NA | 14   | 0 | Low-quality    | Genome-fragment | NA | 0     | 0     |
| 58_extracted_k141_159155  | 2873  | No  | NA | 0    | 1 | Not-determined | Genome-fragment | NA | 0     | 0     |
| 58_extracted_k141_26350   | 4817  | No  | NA | 0    | 2 | Not-determined | Genome-fragment | NA | 0     | 0     |
| 58_extracted_k141_121828  | 1235  | No  | NA | 0    | 2 | Not-determined | Genome-fragment | NA | 0     | 0     |
| 58_extracted_k141_69683   | 1164  | No  | NA | 0    | 0 | Not-determined | Genome-fragment | NA | 0     | 0     |
| 58_extracted_k141_99913   | 7252  | No  | NA | 0    | 2 | Low-quality    | Genome-fragment | NA | 17.02 | 0     |
| 58_extracted_k141_182486  | 7916  | No  | NA | 0    | 1 | Not-determined | Genome-fragment | NA | 0     | 0     |
| 58_extracted_k141_199858  | 3721  | No  | NA | 0    | 3 | Not-determined | Genome-fragment | NA | 0     | 0     |
| 58_extracted_k141_139178  | 4777  | No  | NA | 0    | 3 | Not-determined | Genome-fragment | NA | 0     | 0     |
| 58_extracted_k141_191273  | 1213  | No  | NA | 0    | 0 | Not-determined | Genome-fragment | NA | 0     | 0     |
| 58_extracted_k141_121839  | 1038  | No  | NA | 0    | 1 | Not-determined | Genome-fragment | NA | 0     | 0     |
| 516_extracted_68235       | 7258  | No  | NA | 2    | 0 | Low-quality    | Genome-fragment | NA | 12.71 | 0     |
| 58_extracted_k141_95672   | 2149  | No  | NA | 0    | 2 | Not-determined | Genome-fragment | NA | 0     | 0     |
| 58_extracted_k141_104422  | 7103  | No  | NA | 0    | 4 | Not-determined | Genome-fragment | NA | 0     | 0     |
| 58_extracted_k141_191296  | 1146  | No  | NA | 0    | 1 | Not-determined | Genome-fragment | NA | 0     | 0     |
| 58_extracted_k141_121852  | 7916  | No  | NA | 0    | 3 | Not-determined | Genome-fragment | NA | 5.82  | 0     |
| 512_extracted_k141_167630 | 7258  | No  | NA | 0    | 1 | Low-quality    | Genome-fragment | NA | 0     | 0     |
| 58_extracted_k141_147709  | 12425 | No  | NA | 0    | 3 | Not-determined | Genome-fragment | NA | 0     | 0     |
| 58_extracted_k141_61120   | 3073  | No  | NA | 0    | 1 | Not-determined | Genome-fragment | NA | 0     | 0     |
| 58_extracted_k141_121863  | 8687  | No  | NA | 0    | 4 | Not-determined | Genome-fragment | NA | 0     | 0     |
| 58_extracted_k141_156581  | 3856  | No  | NA | 0    | 2 | Not-determined | Genome-fragment | NA | 0     | 0     |
| 58_extracted_k141_95708   | 1141  | No  | NA | 0    | 2 | Not-determined | Genome-fragment | NA | 0     | 0     |
| 58_extracted_k141_147720  | 1016  | No  | NA | 0    | 1 | Not-determined | Genome-fragment | NA | 0     | 0     |
| 511_vs_k141_39674[Full]   | 7261  | No  | NA | 1    | 0 | Low-quality    | Genome-fragment | NA | 4.39  | 0     |
| 58_extracted_k141_17576   | 3132  | No  | NA | 0    | 0 | Not-determined | Genome-fragment | NA | 0     | 0     |
| 53_vs_k141_30057[Full]    | 7261  | No  | NA | 7    | 0 | Low-quality    | Genome-fragment | NA | 15.46 | 0     |
| 58_extracted_k141_130565  | 1358  | No  | NA | 0    | 0 | Not-determined | Genome-fragment | NA | 0     | 0     |
| 58_extracted_k141_191350  | 2175  | No  | NA | 0    | 1 | Not-determined | Genome-fragment | NA | 0     | 0     |
| 58_extracted_k141_87293   | 3400  | No  | NA | 0    | 1 | Not-determined | Genome-fragment | NA | 0     | 0     |
| 58_extracted_k141_87296   | 1375  | No  | NA | 0    | 0 | Not-determined | Genome-fragment | NA | 0     | 0     |
| 58_extracted_k141_87301   | 1137  | No  | NA | 0    | 0 | Not-determined | Genome-fragment | NA | 0     | 0     |
| 58_extracted_k141_35137   | 1053  | No  | NA | 0    | 1 | Not-determined | Genome-fragment | NA | 0     | 0     |
| 53_extracted_k141_72510   | 7264  | Yes | NA | 3597 | 2 | Low-quality    | Genome-fragment | NA | 2.2   | 50.48 |
| 58_extracted_k141_147750  | 3752  | No  | NA | 0    | 2 | Not-determined | Genome-fragment | NA | 0     | 0     |
| 58_extracted_k141_78548   | 4696  | No  | NA | 0    | 3 | Not-determined | Genome-fragment | NA | 0     | 0     |
| 58_extracted_k141_191387  | 1904  | No  | NA | 0    | 2 | Not-determined | Genome-fragment | NA | 0     | 0     |
| 58_extracted_k141_182535  | 1374  | No  | NA | 0    | 1 | Not-determined | Genome-fragment | NA | 0     | 0     |
| 58_extracted_k141_130608  | 1573  | No  | NA | 0    | 1 | Not-determined | Genome-fragment | NA | 0     | 0     |
| 58_extracted_k141_78557   | 1378  | No  | NA | 0    | 1 | Not-determined | Genome-fragment | NA | 0     | 0     |
| 58_extracted_k141_165531  | 1118  | No  | NA | 0    | 1 | Not-determined | Genome-fragment | NA | 0     | 0     |
| 57_extracted_128687       | 7267  | No  | NA | 4    | 0 | Low-quality    | Genome-fragment | NA | 11.77 | 0     |
| 514_vs_k141_41916[Full]   | 7275  | No  | NA | 3    | 0 | Low-quality    | Genome-fragment | NA | 5.64  | 0     |
| 512_extracted_k141_112763 | 7278  | No  | NA | 0    | 0 | Low-quality    | Genome-fragment | NA | 6.68  | 0     |
| 58_extracted_k141_87331   | 3301  | No  | NA | 0    | 1 | Not-determined | Genome-fragment | NA | 0     | 0     |
| 53_extracted_k141_38921   | 7283  | No  | NA | 1    | 1 | Low-quality    | Genome-fragment | NA | 9.08  | 0     |
| 58_extracted_k141_104483  | 6389  | No  | NA | 0    | 2 | Not-determined | Genome-fragment | NA | 0     | 0     |
| 57_extracted_58448        | 7285  | No  | NA | 6    | 0 | Low-quality    | Genome-fragment | NA | 18.94 | 0     |
| 58_extracted_k141_69723   | 1475  | No  | NA | 0    | 2 | Not-determined | Genome-fragment | NA | 0     | 0     |
| 58_extracted_k141_61152   | 1025  | No  | NA | 0    | 1 | Not-determined | Genome-fragment | NA | 0     | 0     |
| 57_vs_6521[Full]          | 7286  | No  | NA | 18   | 0 | Low-quality    | Genome-fragment | NA | 19.26 | 0     |
| 514_extracted_k141_18137  | 7287  | No  | NA | 2    | 0 | Low-quality    | Genome-fragment | NA | 12.85 | 0     |
| 58_extracted_k141_199970  | 2715  | No  | NA | 0    | 1 | Not-determined | Genome-fragment | NA | 0     | 0     |
| 58_extracted_k141_69731   | 1469  | No  | NA | 0    | 0 | Not-determined | Genome-fragment | NA | 0     | 0     |
| 58_extracted_k141_130630  | 1560  | No  | NA | 0    | 2 | Not-determined | Genome-fragment | NA | 0     | 0     |
| 58_extracted_k141_78590   | 1140  | No  | NA | 0    | 0 | Not-determined | Genome-fragment | NA | 0     | 0     |
| 58_extracted_k141_151429  | 1707  | No  | NA | 0    | 0 | Not-determined | Genome-fragment | NA | 0     | 0     |
| 58_extracted_k141_173908  | 1048  | No  | NA | 0    | 0 | Not-determined | Genome-fragment | NA | 0     | 0     |
| 58_extracted_k141_87354   | 3839  | No  | NA | 0    | 0 | Not-determined | Genome-fragment | NA | 0     | 0     |
| 58_extracted_k141_121934  | 1595  | No  | NA | 0    | 1 | Not-determined | Genome-fragment | NA | 0     | 0     |
| 58_extracted_k141_35188   | 4615  | No  | NA | 0    | 1 | Not-determined | Genome-fragment | NA | 0     | 0     |
| 58_extracted_k141_165354  | 2068  | No  | NA | 0    | 1 | Not-determined | Genome-fragment | NA | 0     | 0     |
| 58_extracted_k141_78600   | 3564  | No  | NA | 0    | 3 | Not-determined | Genome-fragment | NA | 0     | 0     |
| 58_extracted_k141_151441  | 4530  | No  | NA | 0    | 1 | Not-determined | Genome-fragment | NA | 0     | 0     |
| 58_extracted_k141_87365   | 1141  | No  | NA | 0    | 0 | Not-determined | Genome-fragment | NA | 0     | 0     |
| 58_extracted_k141_130640  | 1378  | No  | NA | 0    | 1 | Not-determined | Genome-fragment | NA | 0     | 0     |
| 58_extracted_k141_104512  | 23914 | No  | NA | 0    | 1 | Not-determined | Genome-fragment | NA | 0     | 0     |
| 58_extracted_k141_498     | 1722  | No  | NA | 0    | 0 | Not-determined | Genome-fragment | NA | 0     | 0     |
| 517_extracted_k141_107910 | 7292  | No  | NA | 0    | 0 | Low-quality    | Genome-fragment | NA | 10.47 | 0     |
| 58_extracted_k141_121946  | 2780  | No  | NA | 0    | 1 | Not-determined | Genome-fragment | NA | 0     | 0     |
| 517_vs_k141_181071[Full]  | 7293  | No  | NA | 0    | 0 | Low-quality    | Genome-fragment | NA | 9.07  | 0     |
| 58_extracted_k141_113217  | 1129  | No  | NA | 0    | 0 | Not-determined | Genome-fragment | NA | 0     | 0     |
| 58_extracted_k141_43815   | 8958  | No  | NA | 0    | 4 | Not-determined | Genome-fragment | NA | 21.59 | 0     |
| 57_vs_84660[Full]         | 7297  | No  | NA | 0    | 0 | Low-quality    | Genome-fragment | NA | 0     | 0     |
| 58_extracted_k141_165383  | 1995  | No  | NA | 0    | 0 | Not-determined | Genome-fragment | NA | 0     | 0     |
| 58_extracted_k141_104530  | 4687  | No  | NA | 0    | 3 | Not-determined | Genome-fragment | NA | 0     | 0     |
| 58_extracted_k141_61169   | 1651  | No  | NA | 0    | 1 | Not-determined | Genome-fragment | NA | 0     | 0     |
| 58_extracted_k141_78638   | 6942  | No  | NA | 0    | 3 | Not-determined | Genome-fragment | NA | 0     | 0     |
| 58_extracted_k141_165399  | 1190  | No  | NA | 0    | 1 | Not-determined | Genome-fragment | NA | 0     | 0     |
| 58_extracted_k141_61194   | 1597  | No  | NA | 0    | 0 | Not-determined | Genome-fragment | NA | 0     | 0     |
| 58_extracted_k141_130678  | 1864  | No  | NA | 0    | 2 | Not-determined | Genome-fragment | NA | 0     | 0     |
| 58_extracted_k141_541     | 1566  | No  | NA | 0    | 0 | Not-determined | Genome-fragment | NA | 0     | 0     |
| 58_extracted_k141_165403  | 2225  | No  | NA | 0    | 1 | Not-determined | Genome-fragment | NA | 0     | 0     |
| 512_vs_k141_48681[Full]   | 7297  | No  | NA | 1    | 0 | Low-quality    | Genome-fragment | NA | 17.27 | 0     |
| 58_extracted_k141_52564   | 1710  | No  | NA | 0    | 1 | Not-determined | Genome-fragment | NA | 0     | 0     |
| 58_extracted_k141_139290  | 4314  | No  | NA | 0    | 3 | Not-determined | Genome-fragment | NA | 0     | 0     |
| 58_extracted_k141_17656   | 1211  | No  | NA | 0    | 0 | Not-determined | Genome-fragment | NA | 0     | 0     |
| 58_extracted_k141_52569   | 1892  | No  | NA | 0    | 2 | Not-determined | Genome-fragment | NA | 0     | 0     |
| 58_extracted_k141_147849  | 1128  | No  | NA | 0    | 1 | Not-determined | Genome-fragment | NA | 0     | 0     |
| 58_extracted_k141_35230   | 2240  | No  | NA | 0    | 1 | Not-determined | Genome-fragment | NA | 0     | 0     |
| 58_extracted_k141_78656   | 1002  | No  | NA | 0    | 1 | Not-determined | Genome-fragment | NA | 0     | 0     |
| 58_extracted_k141_130695  | 1318  | No  | NA | 0    | 0 | Not-determined | Genome-fragment | NA | 0     | 0     |
| 58_extracted_k141_139314  | 2815  | No  | NA | 0    | 0 | Not-determined | Genome-fragment | NA | 0     | 0     |
| 58_extracted_k141_173938  | 1218  | No  | NA | 0    | 0 | Not-determined | Genome-fragment | NA | 0     | 0     |
| 58_extracted_k141_35247   | 1138  | No  | NA | 0    | 2 | Not-determined | Genome-fragment | NA | 0     | 0     |
| 511_vs_k141_35881[Full]   | 7299  | No  | NA | 10   | 0 | Low-quality    | Genome-fragment | NA | 23.99 | 0     |
| 58_extracted_k141         |       |     |    |      |   |                |                 |    |       |       |



|                           |           |    |       |    |                |                 |       |       |
|---------------------------|-----------|----|-------|----|----------------|-----------------|-------|-------|
| 55_extracted_k141_6186    | 7320 No   | NA | 1     | 1  | Low-quality    | Genome-fragment | 3.97  | 0     |
| 58_extracted_k141_51696   | 1095 No   | NA | 0     | 0  | Not-determined | Genome-fragment | NA    | 0     |
| 514_vs_k141_53020[1]full  | 7323 No   | NA | 2     | 0  | Low-quality    | Genome-fragment | 16.56 | 0     |
| 58_extracted_k141_113284  | 1134 No   | NA | 0     | 1  | Not-determined | Genome-fragment | NA    | 0     |
| 57_extracted_130522       | 7327 No   | NA | 1     | 0  | Low-quality    | Genome-fragment | 15.2  | 0     |
| 58_vs_k141_42738[1]full   | 7330 No   | NA | 0     | 4  | Low-quality    | Genome-fragment | 5.04  | 0     |
| 58_extracted_k141_104706  | 1261 No   | NA | 0     | 0  | Not-determined | Genome-fragment | NA    | 0     |
| 513_vs_104066[1]full      | 7331 Yes  | NA | 1     | 4  | Low-quality    | Genome-fragment | 1.06  | 76.57 |
| 514_extracted_k141_85050  | 7331 No   | NA | 1     | 0  | Low-quality    | Genome-fragment | 13.32 | 0     |
| 58_extracted_k141_148006  | 1042 No   | NA | 0     | 1  | Not-determined | Genome-fragment | NA    | 0     |
| 58_extracted_k141_26550   | 67068 No  | NA | 0     | 48 | Not-determined | Genome-fragment | NA    | 0     |
| 58_extracted_k141_35310   | 6012 No   | NA | 0     | 0  | Not-determined | Genome-fragment | NA    | 0     |
| 58_extracted_k141_26552   | 1540 No   | NA | 0     | 1  | Not-determined | Genome-fragment | NA    | 0     |
| 58_extracted_k141_35311   | 1180 No   | NA | 0     | 1  | Not-determined | Genome-fragment | NA    | 0     |
| 58_extracted_k141_78679   | 2541 No   | NA | 0     | 3  | Not-determined | Genome-fragment | NA    | 0     |
| 58_extracted_k141_95957   | 1367 No   | NA | 0     | 2  | Not-determined | Genome-fragment | NA    | 0     |
| 58_extracted_k141_165556  | 1399 No   | NA | 0     | 0  | Not-determined | Genome-fragment | NA    | 0     |
| 58_extracted_k141_148023  | 1083 No   | NA | 0     | 1  | Not-determined | Genome-fragment | NA    | 0     |
| 58_extracted_k141_681     | 4458 No   | NA | 0     | 4  | Not-determined | Genome-fragment | NA    | 0     |
| 58_extracted_k141_26560   | 6151 No   | NA | 0     | 3  | Not-determined | Genome-fragment | NA    | 0     |
| 58_extracted_k141_17782   | 7805 No   | NA | 0     | 9  | Not-determined | Genome-fragment | NA    | 0     |
| 58_extracted_k141_113314  | 1103 No   | NA | 0     | 1  | Not-determined | Genome-fragment | NA    | 0     |
| 58_extracted_k141_87522   | 1026 No   | NA | 0     | 1  | Not-determined | Genome-fragment | NA    | 0     |
| 58_extracted_k141_148039  | 1676 No   | NA | 0     | 2  | Not-determined | Genome-fragment | NA    | 0     |
| 58_extracted_k141_122149  | 6080 No   | NA | 0     | 4  | Not-determined | Genome-fragment | NA    | 4.77  |
| 511_vs_k141_25665[1]full  | 7338 No   | NA | 1     | 0  | Low-quality    | Genome-fragment | NA    | 0     |
| 58_vs_k141_195615[1]full  | 7338 No   | NA | 1     | 1  | Low-quality    | Genome-fragment | 1.165 | 0     |
| 58_extracted_k141_52744   | 1437 No   | NA | 0     | 1  | Not-determined | Genome-fragment | NA    | 0     |
| 58_extracted_k141_17802   | 1186 No   | NA | 0     | 0  | Not-determined | Genome-fragment | NA    | 0     |
| 58_extracted_k141_26587   | 3280 No   | NA | 0     | 1  | Not-determined | Genome-fragment | NA    | 0     |
| 58_extracted_k141_69911   | 1852 No   | NA | 0     | 1  | Not-determined | Genome-fragment | NA    | 0     |
| 58_extracted_k141_11215   | 4030 No   | NA | 0     | 1  | Not-determined | Genome-fragment | NA    | 0     |
| 58_extracted_k141_165604  | 4976 No   | NA | 0     | 3  | Not-determined | Genome-fragment | NA    | 0     |
| 58_extracted_k141_130838  | 1971 No   | NA | 0     | 1  | Not-determined | Genome-fragment | NA    | 0     |
| 58_extracted_k141_122170  | 2248 No   | NA | 0     | 1  | Not-determined | Genome-fragment | NA    | 0     |
| 58_extracted_k141_200083  | 9165 No   | NA | 0     | 1  | Not-determined | Genome-fragment | NA    | 0     |
| 58_extracted_k141_17820   | 1047 No   | NA | 0     | 1  | Not-determined | Genome-fragment | NA    | 0     |
| 58_extracted_k141_35349   | 5645 No   | NA | 0     | 4  | Not-determined | Genome-fragment | NA    | 0     |
| 58_extracted_k141_110843  | 2225 No   | NA | 0     | 1  | Not-determined | Genome-fragment | NA    | 0     |
| 58_extracted_k141_113355  | 1246 No   | NA | 0     | 1  | Not-determined | Genome-fragment | NA    | 0     |
| 58_extracted_k141_113358  | 1180 No   | NA | 0     | 1  | Not-determined | Genome-fragment | NA    | 0     |
| 58_extracted_k141_96009   | 1307 No   | NA | 0     | 1  | Not-determined | Genome-fragment | NA    | 0     |
| 58_extracted_k141_35358   | 2233 No   | NA | 0     | 0  | Not-determined | Genome-fragment | NA    | 0     |
| 58_extracted_k141_730     | 3833 No   | NA | 0     | 4  | Not-determined | Genome-fragment | NA    | 0     |
| 58_extracted_k141_26606   | 1218 No   | NA | 0     | 0  | Not-determined | Genome-fragment | NA    | 0     |
| 58_extracted_k141_191665  | 1200 No   | NA | 0     | 0  | Not-determined | Genome-fragment | NA    | 0     |
| 58_extracted_k141_139479  | 1086 No   | NA | 0     | 2  | Not-determined | Genome-fragment | NA    | 0     |
| 51_vs_k141_18675[1]full   | 7340 No   | NA | 4     | 0  | Low-quality    | Genome-fragment | 17.21 | 0     |
| 51_extracted_k141_96449   | 7341 No   | NA | 0     | 0  | Low-quality    | Genome-fragment | 12.82 | 0     |
| 512_extracted_k141_104489 | 7341 No   | NA | 0     | 1  | Low-quality    | Genome-fragment | 11.74 | 0     |
| 58_extracted_k141_156705  | 7354 No   | NA | 4     | 0  | Low-quality    | Genome-fragment | 15.8  | 0     |
| 58_extracted_k141_61437   | 4549 No   | NA | 0     | 0  | Not-determined | Genome-fragment | NA    | 0     |
| 58_extracted_k141_26614   | 1777 No   | NA | 0     | 1  | Not-determined | Genome-fragment | NA    | 0     |
| 516_extracted_54256       | 7355 No   | NA | 4     | 0  | Low-quality    | Genome-fragment | 17.94 | 0     |
| 58_extracted_k141_760     | 1091 No   | NA | 2     | 2  | Not-determined | Genome-fragment | NA    | 0     |
| 58_extracted_k141_96039   | 1576 No   | NA | 0     | 0  | Not-determined | Genome-fragment | NA    | 0     |
| 58_vs_k141_34691[1]full   | 7358 No   | NA | 2     | 0  | Low-quality    | Genome-fragment | 6.19  | 0     |
| 58_extracted_k141_43949   | 2027 No   | NA | 0     | 1  | Not-determined | Genome-fragment | NA    | 0     |
| 58_extracted_k141_9133    | 1091 No   | NA | 0     | 0  | Not-determined | Genome-fragment | NA    | 0     |
| 55_vs_k141_75023[1]full   | 7361 No   | NA | 1     | 0  | Low-quality    | Genome-fragment | 9.69  | 0     |
| 58_extracted_k141_773     | 1242 No   | NA | 0     | 1  | Not-determined | Genome-fragment | NA    | 0     |
| 58_extracted_k141_26641   | 1890 No   | NA | 0     | 1  | Not-determined | Genome-fragment | NA    | 0     |
| 58_extracted_k141_26643   | 2568 No   | NA | 0     | 0  | Not-determined | Genome-fragment | NA    | 0     |
| 58_extracted_k141_43978   | 1368 No   | NA | 0     | 1  | Not-determined | Genome-fragment | NA    | 0     |
| 513_extracted_41163       | 7374 No   | NA | 0     | 0  | Low-quality    | Genome-fragment | 16.29 | 0     |
| 58_extracted_k141_156746  | 1068 No   | NA | 0     | 1  | Not-determined | Genome-fragment | NA    | 0     |
| 58_extracted_k141_191703  | 2205 No   | NA | 0     | 1  | Not-determined | Genome-fragment | NA    | 0     |
| 51_vs_k141_112884[1]full  | 7377 Yes  | NA | 1     | 1  | Low-quality    | Genome-fragment | 5.9   | 46.56 |
| 58_extracted_k141_51821   | 6201 No   | NA | 0     | 0  | Not-determined | Genome-fragment | NA    | 0     |
| 55_extracted_k141_62218   | 7378 No   | NA | 0     | 2  | Low-quality    | Genome-fragment | 7.8   | 0     |
| 58_extracted_k141_104769  | 1099 No   | NA | 0     | 2  | Not-determined | Genome-fragment | NA    | 0     |
| 58_extracted_k141_78810   | 1574 No   | NA | 0     | 2  | Not-determined | Genome-fragment | NA    | 0     |
| 58_extracted_k141_122206  | 56408 Yes | NA | 54016 | 12 | High-quality   | High-quality    | 100   | 4.24  |
| 58_extracted_k141_139544  | 1391 No   | NA | 0     | 1  | Not-determined | Genome-fragment | NA    | 0     |
| 58_extracted_k141_156773  | 1676 No   | NA | 0     | 0  | Not-determined | Genome-fragment | NA    | 0     |
| 58_extracted_k141_165678  | 1150 No   | NA | 0     | 2  | Not-determined | Genome-fragment | NA    | 0     |
| 58_extracted_k141_26687   | 1791 No   | NA | 0     | 1  | Not-determined | Genome-fragment | NA    | 0     |
| 58_extracted_k141_61503   | 2630 No   | NA | 0     | 2  | Not-determined | Genome-fragment | NA    | 0     |
| 58_extracted_k141_51845   | 1059 No   | NA | 0     | 0  | Not-determined | Genome-fragment | NA    | 0     |
| 58_extracted_k141_182741  | 1380 No   | NA | 0     | 1  | Not-determined | Genome-fragment | NA    | 0     |
| 58_extracted_k141_70005   | 1914 No   | NA | 0     | 1  | Not-determined | Genome-fragment | NA    | 0     |
| 58_extracted_k141_19174   | 1157 No   | NA | 0     | 1  | Not-determined | Genome-fragment | NA    | 0     |
| 58_extracted_k141_44033   | 1210 No   | NA | 0     | 0  | Not-determined | Genome-fragment | NA    | 0     |
| 58_extracted_k141_96073   | 1194 No   | NA | 0     | 0  | Not-determined | Genome-fragment | NA    | 0     |
| 514_vs_k141_48629[1]full  | 7379 No   | NA | 0     | 0  | Low-quality    | Genome-fragment | 19.06 | 0     |
| 58_extracted_k141_96076   | 1225 No   | NA | 0     | 1  | Not-determined | Genome-fragment | NA    | 0     |
| 58_extracted_k141_44044   | 1128 No   | NA | 0     | 2  | Not-determined | Genome-fragment | NA    | 0     |
| 58_extracted_k141_130963  | 1661 No   | NA | 0     | 1  | Not-determined | Genome-fragment | NA    | 0     |
| 58_extracted_k141_35408   | 1272 No   | NA | 0     | 0  | Not-determined | Genome-fragment | NA    | 0     |
| 58_extracted_k141_17945   | 1465 No   | NA | 0     | 2  | Not-determined | Genome-fragment | NA    | 0     |
| 58_extracted_k141_17950   | 1334 No   | NA | 0     | 1  | Not-determined | Genome-fragment | NA    | 0     |
| 58_extracted_k141_20012   | 7617 No   | NA | 0     | 0  | Not-determined | Genome-fragment | NA    | 0     |
| 58_extracted_k141_139599  | 8774 No   | NA | 0     | 1  | Not-determined | Genome-fragment | NA    | 0     |
| 58_extracted_k141_87698   | 1106 No   | NA | 0     | 1  | Not-determined | Genome-fragment | NA    | 0     |
| 58_extracted_k141_94939   | 4055 No   | NA | 0     | 0  | Not-determined | Genome-fragment | NA    | 0     |
| 511_vs_k141_63764[1]full  | 7381 No   | NA | 2     | 0  | Low-quality    | Genome-fragment | 17.75 | 0     |
| 58_extracted_k141_70055   | 4117 No   | NA | 0     | 1  | Not-determined | Genome-fragment | NA    | 0     |
| 58_extracted_k141_139610  | 5719 No   | NA | 0     | 6  | Not-determined | Genome-fragment | NA    | 0     |
| 58_extracted_k141_1673    | 7382 No   | NA | 0     | 6  | Low-quality    | Genome-fragment | 5.91  | 0     |
| 512_extracted_k141_54321  | 7388 No   | NA | 0     | 0  | Low-quality    | Genome-fragment | 4.37  | 0     |
| 58_extracted_k141_61521   | 1355 No   | NA | 0     | 1  | Not-determined | Genome-fragment | NA    | 0     |
| 58_extracted_k141_11230   | 3544 No   | NA | 0     | 0  | Not-determined | Genome-fragment | NA    | 0     |
| 58_extracted_k141_52858   | 31648 No  | NA | 0     | 10 | Not-determined | Genome-fragment | NA    | 0     |
| 58_extracted_k141_200148  | 1454 No   | NA | 0     | 0  | Not-determined | Genome-fragment | NA    | 0     |
| 58_extracted_k141_112321  | 2557 No   | NA | 0     | 1  | Not-determined | Genome-fragment | NA    | 0     |
| 58_extracted_k141_78916   | 1400 No   | NA | 0     | 2  | Not-determined | Genome-fragment | NA    | 0     |
| 58_extracted_k141_26782   | 1498 No   | NA | 0     | 0  | Not-determined | Genome-fragment | NA    | 0     |
| 58_extracted_k141_191798  | 3240 No   | NA | 0     | 0  | Not-determined | Genome-fragment | NA    | 0     |
| 58_extracted_k141_61538   | 2563 No   | NA | 0     | 0  | Not-determined | Genome-fragment | NA    | 0     |
| 58_extracted_k141_148201  | 3003 No   | NA | 0     | 1  | Not-determined | Genome-fragment | NA    | 0     |
| 516_vs_44092[1]full       | 7394 No   | NA | 1     | 0  | Low-quality    | Genome-fragment | 6.91  | 0     |
| 58_extracted_k141_26805   | 2723 No   | NA | 0     | 1  | Not-determined | Genome-fragment | NA    | 0     |
| 58_extracted_k141_52880   | 2522 No   | NA | 0     | 0  | Not-determined | Genome-fragment | NA    | 0     |
| 58_extracted_k141_182814  | 1587 No   | NA | 0     | 0  | Not-determined | Genome-fragment | NA    | 0     |
| 58_extracted_k141_9485    | 1408 No   | NA | 0     | 1  | Not-determined | Genome-fragment | NA    | 0     |
| 58_extracted_k141_44174   | 3038 No   | NA | 0     | 1  | Not-determined | Genome-fragment | NA    | 0     |
| 58_extracted_k141_35506   | 2810 No   | NA | 0     | 2  | Not-determined | Genome-fragment | NA    | 0     |
| 58_extracted_k141_26823   | 3255 No   | NA | 0     | 0  | Not-determined | Genome-fragment | NA    | 0     |
| 511_vs_k141_72602[1]full  | 7395 No   | NA | 3     | 0  | Low-quality    | Genome-fragment | 4.78  | 0     |
| 58_extracted_k141_131009  | 57372 No  | NA | 18    | 1  | Complete       | High-quality    | 100   | 0     |
| 51_extracted_k141_119611  | 7395 No   | NA | 2     | 0  | Low-quality    | Genome-fragment | 5.97  | 0     |
| 58_extracted_k141_96188   | 1227 No   | NA | 0     | 1  | Not-determined | Genome-fragment | NA    | 0     |
| 516_extracted_88409       | 7400 No   | NA | 0     | 3  | Low-quality    | Genome-fragment | 0.64  | 0     |
| 58_extracted_k141_44203   | 1576 No   | NA | 0     | 2  | Not-determined | Genome-fragment | NA    | 0     |
| 58_extracted_k141_964     | 1417 No   | NA | 0     | 0  | Not-determined | Genome-fragment | NA    | 0     |
| 58_extracted_k141_156881  | 2037 No   | NA | 0     | 0  | Not-determined | Genome-fragment | NA    | 0     |
| 57_vs_30348[1]full        | 1931 No   | NA | 0     | 1  | Not-determined | Genome-fragment | NA    | 0     |
| 58_extracted_k141_52902   | 7401 No   | NA | 0     | 0  | Low-quality    | Genome-fragment | 17.91 | 0     |
| 58_extracted_k141_148252  | 11366 No  | NA | 0     | 3  | Not-determined | Genome-fragment | NA    | 0     |
| 58_extracted_k141_104902  | 1198 No   | NA | 0     | 0  | Not-determined | Genome-fragment | NA    | 0     |
| 53_vs_k141_13711[1]full   | 1024 No   | NA | 0     | 0  | Not-determined | Genome-fragment | NA    | 0     |
| 58_extracted_k141_182853  | 7403 No   | NA | 0     | 0  | Low-quality    | Genome-fragment | 17.65 | 0     |
| 58_extracted_k141_131059  | 1077 No   | NA | 0     | 0  | Not-determined | Genome-fragment | NA    | 0     |
| 511_vs_k141_17254[1]full  | 1026 No   | NA | 0     | 0  | Not-determined | Genome-fragment | NA    | 0     |
| 58_extracted_k141_104908  | 7404 No   | NA | 0     | 0  | Low-quality    | Genome-fragment | 18.43 | 0     |
| 58_extracted_k141_122408  | 4360 No   | NA | 0     | 0  | Not-determined | Genome-fragment | NA    | 0     |
| 58_extracted_k141_87755   | 6158 No   | NA | 0     | 1  | Not-determined | Genome-fragment | NA    | 0     |
| 58_extracted_k141_182864  | 54718 No  | NA | 4     | 0  | Medium-quality | Genome-fragment | 51.78 | 0     |
| 58_extracted_k141_61629   | 2856 No   | NA | 0     | 1  | Not-determined | Genome-fragment | NA    | 0     |
| 58_extracted_k141_52925   | 4274 No   | NA | 0     | 1  | Not-determined | Genome-fragment | NA    | 0     |
| 58_extracted_k141_104920  | 2032 No   | NA | 0     | 1  | Not-determined | Genome-fragment | NA    | 0     |
| 58_extracted_k141_191924  | 1005 No   | NA | 0     | 1  | Not-determined | Genome-fragment | NA    | 0     |
| 58_extracted_k141_9553    | 3252 No   | NA | 0     | 0  | Not-determined | Genome-fragment | NA    | 0     |
| 58_extracted_k141_908     | 2044 No   | NA | 0     | 1  | Not-determined | Genome-fragment | NA    | 0     |
| 58_extracted_k141_131094  | 1893 No   | NA | 0     | 0  | Not-determined | Genome-fragment | NA    | 0     |
| 58_extracted_k141_9562    | 1069 No   | NA | 0     | 1  | Not-determined | Genome-fragment | NA    | 0     |
| 58_extracted_k141_26921   | 1303 No   | NA | 0     | 2  | Not-determined | Genome-fragment | NA    | 0     |
| 58_extracted_k141_200183  | 1096 No   | NA | 0     | 1  | Not-determined | Genome-fragment | NA    | 0     |
| 58_extracted_k141_191946  | 1057 No   | NA | 0     | 1  | Not-determined | Genome-fragment | NA    | 0     |
| 58_extracted_k141_191952  | 1379 No   | NA | 0     | 2  | Not-determined | Genome-fragment | NA    | 0     |
| 58_extracted_k141_200150  | 1003 No   | NA | 0     | 1  | Not-determined | Genome-fragment | NA    | 0     |
| 58_extracted_k141_113578  | 1010 No   | NA | 0     | 1  | Not-determined | Genome-fragment | NA    | 0     |
| 58_extracted_k141_113581  | 2355 No</ |    |       |    |                |                 |       |       |



|                          |       |    |    |    |   |                |                 |       |   |
|--------------------------|-------|----|----|----|---|----------------|-----------------|-------|---|
| 53_extracted_k141_38857  | 7424  | No | NA | 6  | 0 | Low-quality    | Genome-fragment | 15.77 | 0 |
| 58_extracted_k141_20020  | 1003  | No | NA | 0  | 0 | Not-determined | Genome-fragment | NA    | 0 |
| 55_extracted_k141_26612  | 7425  | No | NA | 1  | 0 | Low-quality    | Genome-fragment | 4.03  | 0 |
| 58_extracted_k141_113616 | 8971  | No | NA | 0  | 6 | Not-determined | Genome-fragment | NA    | 0 |
| 58_extracted_k141_131153 | 3245  | No | NA | 0  | 1 | Not-determined | Genome-fragment | NA    | 0 |
| 58_extracted_k141_50991  | 1201  | No | NA | 0  | 1 | Not-determined | Genome-fragment | NA    | 0 |
| 58_extracted_k141_157000 | 1143  | No | NA | 0  | 0 | Not-determined | Genome-fragment | NA    | 0 |
| 58_extracted_k141_104998 | 1421  | No | NA | 0  | 0 | Not-determined | Genome-fragment | NA    | 0 |
| 58_extracted_k141_61716  | 1081  | No | NA | 0  | 0 | Not-determined | Genome-fragment | NA    | 0 |
| 58_extracted_k141_87822  | 1139  | No | NA | 0  | 0 | Not-determined | Genome-fragment | NA    | 0 |
| 56_vs_k141_54491[full]   | 7432  | No | NA | 7  | 0 | Low-quality    | Genome-fragment | 15.58 | 0 |
| 58_extracted_k141_200210 | 9596  | No | NA | 0  | 3 | Not-determined | Genome-fragment | NA    | 0 |
| 58_extracted_k141_165814 | 3151  | No | NA | 0  | 1 | Not-determined | Genome-fragment | NA    | 0 |
| 512_vs_k141_249711[full] | 7433  | No | NA | 1  | 0 | Low-quality    | Genome-fragment | 1.37  | 0 |
| 58_extracted_k141_87827  | 3051  | No | NA | 0  | 8 | Not-determined | Genome-fragment | NA    | 0 |
| 55_vs_k141_63165[full]   | 7435  | No | NA | 0  | 1 | Low-quality    | Genome-fragment | 15.47 | 0 |
| 58_extracted_k141_182925 | 1069  | No | NA | 0  | 0 | Not-determined | Genome-fragment | NA    | 0 |
| 58_extracted_k141_44274  | 1193  | No | NA | 0  | 1 | Not-determined | Genome-fragment | NA    | 0 |
| 58_extracted_k141_79102  | 1379  | No | NA | 0  | 1 | Not-determined | Genome-fragment | NA    | 0 |
| 58_extracted_k141_9577   | 2100  | No | NA | 0  | 2 | Not-determined | Genome-fragment | NA    | 0 |
| 517_vs_k141_j4999[full]  | 7438  | No | NA | 1  | 0 | Low-quality    | Genome-fragment | 11.92 | 0 |
| 510_vs_57300[full]       | 7444  | No | NA | 3  | 1 | Low-quality    | Genome-fragment | 3.32  | 0 |
| 514_vs_k141_7734[full]   | 7448  | No | NA | 2  | 0 | Low-quality    | Genome-fragment | 12.63 | 0 |
| 58_extracted_k141_174281 | 2812  | No | NA | 0  | 1 | Not-determined | Genome-fragment | NA    | 0 |
| 58_extracted_k141_148374 | 1039  | No | NA | 0  | 1 | Not-determined | Genome-fragment | NA    | 0 |
| 58_extracted_k141_87866  | 1483  | No | NA | 0  | 1 | Not-determined | Genome-fragment | NA    | 0 |
| 58_extracted_k141_113679 | 1008  | No | NA | 0  | 1 | Not-determined | Genome-fragment | NA    | 0 |
| 53_vs_k141_101038[full]  | 7449  | No | NA | 0  | 1 | Low-quality    | Genome-fragment | 6.73  | 0 |
| 512_vs_k141_152798[full] | 7450  | No | NA | 10 | 0 | Low-quality    | Genome-fragment | 21.89 | 0 |
| 58_extracted_k141_44309  | 3787  | No | NA | 0  | 0 | Not-determined | Genome-fragment | NA    | 0 |
| 58_extracted_k141_131692 | 2831  | No | NA | 0  | 1 | Not-determined | Genome-fragment | NA    | 0 |
| 58_extracted_k141_131698 | 1826  | No | NA | 0  | 1 | Not-determined | Genome-fragment | NA    | 0 |
| 58_extracted_k141_131202 | 4632  | No | NA | 0  | 4 | Not-determined | Genome-fragment | NA    | 0 |
| 58_extracted_k141_79143  | 1184  | No | NA | 0  | 1 | Not-determined | Genome-fragment | NA    | 0 |
| 58_extracted_k141_131204 | 1191  | No | NA | 0  | 0 | Not-determined | Genome-fragment | NA    | 0 |
| 58_extracted_k141_174313 | 1143  | No | NA | 0  | 2 | Not-determined | Genome-fragment | NA    | 0 |
| 58_extracted_k141_70206  | 1099  | No | NA | 0  | 1 | Not-determined | Genome-fragment | NA    | 0 |
| 58_extracted_k141_53038  | 3443  | No | NA | 0  | 0 | Not-determined | Genome-fragment | NA    | 0 |
| 53_extracted_k141_2464   | 7452  | No | NA | 0  | 1 | Low-quality    | Genome-fragment | 4.01  | 0 |
| 58_extracted_k141_174322 | 3876  | No | NA | 0  | 1 | Not-determined | Genome-fragment | NA    | 0 |
| 58_extracted_k141_139872 | 6179  | No | NA | 0  | 3 | Not-determined | Genome-fragment | NA    | 0 |
| 58_extracted_k141_18112  | 1078  | No | NA | 0  | 1 | Not-determined | Genome-fragment | NA    | 0 |
| 57_vs_5627[full]         | 7455  | No | NA | 2  | 0 | Low-quality    | Genome-fragment | 17.93 | 0 |
| 58_extracted_k141_18122  | 1549  | No | NA | 0  | 1 | Not-determined | Genome-fragment | NA    | 0 |
| 58_extracted_k141_79180  | 1272  | No | NA | 0  | 1 | Not-determined | Genome-fragment | NA    | 0 |
| 58_extracted_k141_105061 | 3679  | No | NA | 0  | 2 | Not-determined | Genome-fragment | NA    | 0 |
| 58_extracted_k141_131217 | 1455  | No | NA | 0  | 1 | Not-determined | Genome-fragment | NA    | 0 |
| 58_extracted_k141_9659   | 3301  | No | NA | 0  | 2 | Not-determined | Genome-fragment | NA    | 0 |
| 58_extracted_k141_87924  | 1217  | No | NA | 0  | 1 | Not-determined | Genome-fragment | NA    | 0 |
| 511_vs_k141_41299[full]  | 7457  | No | NA | 1  | 2 | Low-quality    | Genome-fragment | 4.61  | 0 |
| 58_extracted_k141_174351 | 1139  | No | NA | 0  | 0 | Not-determined | Genome-fragment | NA    | 0 |
| 58_extracted_k141_18129  | 2117  | No | NA | 0  | 3 | Not-determined | Genome-fragment | NA    | 0 |
| 58_extracted_k141_96435  | 1146  | No | NA | 0  | 1 | Not-determined | Genome-fragment | NA    | 0 |
| 58_extracted_k141_87931  | 1101  | No | NA | 0  | 0 | Not-determined | Genome-fragment | NA    | 0 |
| 51_vs_k141_138181[full]  | 7457  | No | NA | 3  | 0 | Low-quality    | Genome-fragment | 25.99 | 0 |
| 58_extracted_k141_148396 | 1273  | No | NA | 0  | 0 | Not-determined | Genome-fragment | NA    | 0 |
| 58_extracted_k141_35770  | 1035  | No | NA | 0  | 0 | Not-determined | Genome-fragment | NA    | 0 |
| 58_extracted_k141_96439  | 2323  | No | NA | 0  | 1 | Not-determined | Genome-fragment | NA    | 0 |
| 58_extracted_k141_131236 | 1024  | No | NA | 0  | 0 | Not-determined | Genome-fragment | NA    | 0 |
| 58_extracted_k141_105104 | 1017  | No | NA | 0  | 0 | Not-determined | Genome-fragment | NA    | 0 |
| 58_extracted_k141_9684   | 9298  | No | NA | 0  | 3 | Not-determined | Genome-fragment | NA    | 0 |
| 58_extracted_k141_131238 | 1157  | No | NA | 0  | 1 | Not-determined | Genome-fragment | NA    | 0 |
| 58_extracted_k141_27106  | 5313  | No | NA | 0  | 4 | Not-determined | Genome-fragment | NA    | 0 |
| 58_extracted_k141_139925 | 1087  | No | NA | 0  | 2 | Not-determined | Genome-fragment | NA    | 0 |
| 58_extracted_k141_70222  | 28416 | No | NA | 23 | 0 | Not-determined | Genome-fragment | NA    | 0 |
| 58_extracted_k141_105114 | 1040  | No | NA | 0  | 0 | Not-determined | Genome-fragment | NA    | 0 |
| 58_extracted_k141_79215  | 5102  | No | NA | 0  | 1 | Not-determined | Genome-fragment | NA    | 0 |
| 58_extracted_k141_53087  | 2433  | No | NA | 0  | 2 | Not-determined | Genome-fragment | NA    | 0 |
| 58_extracted_k141_105127 | 1342  | No | NA | 0  | 1 | Not-determined | Genome-fragment | NA    | 0 |
| 53_vs_k141_34745[full]   | 7458  | No | NA | 1  | 0 | Low-quality    | Genome-fragment | 6.58  | 0 |
| 58_extracted_k141_139933 | 1659  | No | NA | 0  | 0 | Not-determined | Genome-fragment | NA    | 0 |
| 58_vs_k141_81897[full]   | 7459  | No | NA | 0  | 0 | Low-quality    | Genome-fragment | 15    | 0 |
| 58_extracted_k141_87956  | 1014  | No | NA | 0  | 1 | Not-determined | Genome-fragment | NA    | 0 |
| 516_vs_1738[full]        | 7460  | No | NA | 0  | 4 | Low-quality    | Genome-fragment | 9.54  | 0 |
| 58_extracted_k141_70240  | 1095  | No | NA | 0  | 1 | Not-determined | Genome-fragment | NA    | 0 |
| 58_extracted_k141_35812  | 1141  | No | NA | 0  | 0 | Not-determined | Genome-fragment | NA    | 0 |
| 58_extracted_k141_131263 | 1046  | No | NA | 0  | 1 | Not-determined | Genome-fragment | NA    | 0 |
| 58_extracted_k141_131769 | 17481 | No | NA | 0  | 9 | Not-determined | Genome-fragment | NA    | 0 |
| 58_extracted_k141_18178  | 2011  | No | NA | 0  | 0 | Not-determined | Genome-fragment | NA    | 0 |
| 58_extracted_k141_174399 | 2511  | No | NA | 0  | 3 | Not-determined | Genome-fragment | NA    | 0 |
| 58_extracted_k141_131275 | 1121  | No | NA | 0  | 0 | Not-determined | Genome-fragment | NA    | 0 |
| 58_extracted_k141_9732   | 1367  | No | NA | 0  | 0 | Not-determined | Genome-fragment | NA    | 0 |
| 58_extracted_k141_35836  | 3220  | No | NA | 0  | 0 | Not-determined | Genome-fragment | NA    | 0 |
| 58_extracted_k141_96497  | 3742  | No | NA | 0  | 1 | Not-determined | Genome-fragment | NA    | 0 |
| 58_extracted_k141_87969  | 24464 | No | NA | 0  | 2 | Not-determined | Genome-fragment | NA    | 0 |
| 58_extracted_k141_96501  | 6723  | No | NA | 0  | 5 | Not-determined | Genome-fragment | NA    | 0 |
| 58_extracted_k141_1124   | 1112  | No | NA | 0  | 1 | Not-determined | Genome-fragment | NA    | 0 |
| 510_extracted_1414153    | 7463  | No | NA | 2  | 2 | Low-quality    | Genome-fragment | 18.07 | 0 |
| 58_extracted_k141_96504  | 1069  | No | NA | 0  | 0 | Not-determined | Genome-fragment | NA    | 0 |
| 58_extracted_k141_18209  | 1063  | No | NA | 0  | 1 | Not-determined | Genome-fragment | NA    | 0 |
| 58_extracted_k141_53134  | 2039  | No | NA | 0  | 1 | Not-determined | Genome-fragment | NA    | 0 |
| 58_extracted_k141_27200  | 7466  | No | NA | 0  | 1 | Low-quality    | Genome-fragment | 5.35  | 0 |
| 58_extracted_k141_35854  | 4164  | No | NA | 0  | 2 | Not-determined | Genome-fragment | NA    | 0 |
| 58_extracted_k141_1134   | 5361  | No | NA | 0  | 0 | Not-determined | Genome-fragment | NA    | 0 |
| 58_extracted_k141_96509  | 1370  | No | NA | 0  | 0 | Not-determined | Genome-fragment | NA    | 0 |
| 58_extracted_k141_192163 | 3918  | No | NA | 0  | 0 | Not-determined | Genome-fragment | NA    | 0 |
| 58_extracted_k141_1145   | 1393  | No | NA | 0  | 1 | Not-determined | Genome-fragment | NA    | 0 |
| 58_extracted_k141_79288  | 1027  | No | NA | 0  | 0 | Not-determined | Genome-fragment | NA    | 0 |
| 58_extracted_k141_35877  | 1559  | No | NA | 0  | 1 | Not-determined | Genome-fragment | NA    | 0 |
| 58_extracted_k141_105163 | 1971  | No | NA | 0  | 1 | Not-determined | Genome-fragment | NA    | 0 |
| 58_extracted_k141_96539  | 1075  | No | NA | 0  | 0 | Not-determined | Genome-fragment | NA    | 0 |
| 58_extracted_k141_61855  | 1986  | No | NA | 0  | 2 | Not-determined | Genome-fragment | NA    | 0 |
| 58_extracted_k141_157133 | 1140  | No | NA | 0  | 1 | Not-determined | Genome-fragment | NA    | 0 |
| 58_extracted_k141_140002 | 1464  | No | NA | 0  | 1 | Not-determined | Genome-fragment | NA    | 0 |
| 58_vs_k141_95513[full]   | 7467  | No | NA | 0  | 0 | Low-quality    | Genome-fragment | 17.19 | 0 |
| 58_extracted_k141_18243  | 5577  | No | NA | 0  | 2 | Not-determined | Genome-fragment | NA    | 0 |
| 58_extracted_k141_148554 | 2117  | No | NA | 0  | 1 | Not-determined | Genome-fragment | NA    | 0 |
| 58_extracted_k141_122661 | 1129  | No | NA | 0  | 1 | Not-determined | Genome-fragment | NA    | 0 |
| 58_extracted_k141_122669 | 2131  | No | NA | 0  | 0 | Not-determined | Genome-fragment | NA    | 0 |
| 53_extracted_k141_40381  | 7473  | No | NA | 1  | 0 | Low-quality    | Genome-fragment | 5.87  | 0 |
| 58_extracted_k141_79349  | 3205  | No | NA | 0  | 2 | Not-determined | Genome-fragment | NA    | 0 |
| 58_extracted_k141_200353 | 1158  | No | NA | 0  | 0 | Not-determined | Genome-fragment | NA    | 0 |
| 58_extracted_k141_1205   | 1373  | No | NA | 0  | 0 | Not-determined | Genome-fragment | NA    | 0 |
| 58_extracted_k141_96557  | 1996  | No | NA | 0  | 1 | Not-determined | Genome-fragment | NA    | 0 |
| 58_extracted_k141_122671 | 11403 | No | NA | 0  | 4 | Not-determined | Genome-fragment | NA    | 0 |
| 55_vs_k141_70920[full]   | 7473  | No | NA | 3  | 0 | Low-quality    | Genome-fragment | 11.83 | 0 |
| 58_extracted_k141_1215   | 3919  | No | NA | 0  | 1 | Not-determined | Genome-fragment | NA    | 0 |
| 58_extracted_k141_182913 | 2110  | No | NA | 0  | 3 | Not-determined | Genome-fragment | NA    | 0 |
| 58_extracted_k141_131386 | 2047  | No | NA | 0  | 0 | Not-determined | Genome-fragment | NA    | 0 |
| 58_extracted_k141_192222 | 1214  | No | NA | 0  | 0 | Not-determined | Genome-fragment | NA    | 0 |
| 58_extracted_k141_1230   | 1132  | No | NA | 0  | 1 | Not-determined | Genome-fragment | NA    | 0 |
| 58_extracted_k141_165990 | 4650  | No | NA | 0  | 0 | Not-determined | Genome-fragment | NA    | 0 |
| 58_extracted_k141_122689 | 1943  | No | NA | 0  | 1 | Not-determined | Genome-fragment | NA    | 0 |
| 58_extracted_k141_182929 | 1738  | No | NA | 0  | 0 | Not-determined | Genome-fragment | NA    | 0 |
| 58_extracted_k141_148612 | 1574  | No | NA | 0  | 1 | Not-determined | Genome-fragment | NA    | 0 |
| 510_vs_63798[full]       | 7474  | No | NA | 3  | 0 | Low-quality    | Genome-fragment | 18.3  | 0 |
| 58_extracted_k141_166003 | 1636  | No | NA | 0  | 1 | Not-determined | Genome-fragment | NA    | 0 |
| 511_extracted_k141_69344 | 7478  | No | NA | 0  | 1 | Low-quality    | Genome-fragment | 4.86  | 0 |
| 511_vs_k141_78062[full]  | 7478  | No | NA | 4  | 0 | Low-quality    | Genome-fragment | 20.68 | 0 |
| 58_extracted_k141_148632 | 2757  | No | NA | 0  | 0 | Not-determined | Genome-fragment | NA    | 0 |
| 58_extracted_k141_113827 | 1152  | No | NA | 0  | 1 | Not-determined | Genome-fragment | NA    | 0 |
| 58_extracted_k141_61937  | 3289  | No | NA | 0  | 2 | Not-determined | Genome-fragment | NA    | 0 |
| 58_extracted_k141_96580  | 1625  | No | NA | 0  | 1 | Not-determined | Genome-fragment | NA    | 0 |
| 53_extracted_k141_110790 | 7483  | No | NA | 0  | 6 | Low-quality    | Genome-fragment | 3.35  | 0 |
| 58_extracted_k141_146013 | 2091  | No | NA | 0  | 1 | Not-determined | Genome-fragment | NA    | 0 |
| 58_extracted_k141_174492 | 2433  | No | NA | 0  | 3 | Not-determined | Genome-fragment | NA    | 0 |
| 58_extracted_k141_148644 | 1352  | No | NA | 0  | 0 | Not-determined | Genome-fragment | NA    | 0 |
| 58_extracted_k141_96584  | 2815  | No | NA | 0  | 0 | Not-determined | Genome-fragment | NA    | 0 |
| 512_vs_k141_157523[full] | 7486  | No | NA | 6  | 0 | Low-quality    | Genome-fragment | 12.5  | 0 |
| 58_extracted_k141_18288  | 1164  | No | NA | 0  | 0 | Not-determined | Genome-fragment | NA    | 0 |
| 58_extracted_k141_131428 | 1739  | No | NA | 0  | 2 | Not-determined | Genome-fragment | NA    | 0 |
| 58_extracted_k141_79392  | 5710  | No | NA | 0  | 2 | Not-determined | Genome-fragment | NA    | 0 |
| 58_extracted_k141_131430 | 1070  | No | NA | 0  | 1 | Not-determined | Genome-fragment | NA    | 0 |
| 58_extracted_k141_61944  | 1346  | No | NA | 0  | 1 | Not-determined | Genome-fragment |       |   |



|                           |       |     |      |    |   |                |                 |       |       |
|---------------------------|-------|-----|------|----|---|----------------|-----------------|-------|-------|
| S8_extracted_k141_27412   | 1337  | No  | NA   | 0  | 1 | Not-determined | Genome-fragment | NA    | 0     |
| S8_extracted_k141_12279   | 3559  | No  | NA   | 1  | 1 | Not-determined | Genome-fragment | NA    | 0     |
| S8_extracted_k141_96673   | 2085  | No  | NA   | 0  | 1 | Not-determined | Genome-fragment | NA    | 0     |
| S8_extracted_k141_192380  | 1106  | No  | NA   | 0  | 1 | Not-determined | Genome-fragment | NA    | 0     |
| S8_extracted_k141_27419   | 1523  | No  | NA   | 0  | 0 | Not-determined | Genome-fragment | NA    | 0     |
| S8_extracted_k141_192381  | 2117  | No  | NA   | 0  | 1 | Not-determined | Genome-fragment | NA    | 0     |
| S8_extracted_k141_96679   | 2425  | No  | NA   | 0  | 0 | Not-determined | Genome-fragment | NA    | 0     |
| S8_extracted_k141_79476   | 1170  | No  | NA   | 0  | 2 | Not-determined | Genome-fragment | NA    | 0     |
| S8_extracted_k141_13139   | 7717  | No  | NA   | 0  | 2 | Not-determined | Genome-fragment | NA    | 0     |
| S8_extracted_k141_148724  | 1690  | No  | NA   | 0  | 1 | Not-determined | Genome-fragment | NA    | 0     |
| S10_vs_118179[full]       | 7509  | No  | NA   | 1  | 0 | Low-quality    | Genome-fragment | 19.11 | 0     |
| S8_extracted_k141_123940  | 1261  | No  | NA   | 0  | 1 | Not-determined | Genome-fragment | NA    | 0     |
| S8_extracted_k141_88113   | 1509  | No  | NA   | 0  | 1 | Not-determined | Genome-fragment | NA    | 0     |
| S8_extracted_k141_122824  | 1328  | No  | NA   | 0  | 0 | Not-determined | Genome-fragment | NA    | 0     |
| S8_extracted_k141_105345  | 1627  | No  | NA   | 0  | 0 | Not-determined | Genome-fragment | NA    | 0     |
| S8_extracted_k141_174559  | 16202 | No  | NA   | 0  | 0 | Medium-quality | Genome-fragment | 79.32 | 0     |
| S8_extracted_k141_79505   | 1152  | No  | NA   | 0  | 1 | Not-determined | Genome-fragment | NA    | 0     |
| S8_extracted_k141_105355  | 1643  | No  | NA   | 0  | 0 | Not-determined | Genome-fragment | NA    | 0     |
| S8_extracted_k141_200514  | 1740  | No  | NA   | 0  | 0 | Not-determined | Genome-fragment | NA    | 0     |
| S8_extracted_k141_36076   | 1198  | No  | NA   | 0  | 0 | Not-determined | Genome-fragment | NA    | 0     |
| S4_extracted_7896         | 7509  | No  | NA   | 8  | 0 | Low-quality    | Genome-fragment | 16.39 | 0     |
| S8_extracted_k141_27473   | 1761  | No  | NA   | 0  | 2 | Not-determined | Genome-fragment | NA    | 0     |
| S8_extracted_k141_200531  | 2275  | No  | NA   | 0  | 4 | Not-determined | Genome-fragment | NA    | 0     |
| S8_extracted_k141_96727   | 2720  | No  | NA   | 0  | 0 | Not-determined | Genome-fragment | NA    | 0     |
| S8_extracted_k141_183045  | 46717 | No  | NA   | 18 | 2 | Complete       | High-quality    | 100   | 0     |
| S8_extracted_k141_9809    | 1030  | No  | NA   | 0  | 1 | Not-determined | Genome-fragment | NA    | 0     |
| S8_extracted_k141_79512   | 1136  | No  | NA   | 0  | 1 | Not-determined | Genome-fragment | NA    | 0     |
| S8_extracted_k141_96732   | 1509  | No  | NA   | 0  | 0 | Not-determined | Genome-fragment | NA    | 0     |
| S10_vs_16691[full]        | 7511  | No  | NA   | 1  | 1 | Low-quality    | Genome-fragment | 12.64 | 0     |
| S16_extracted_149579      | 7512  | No  | NA   | 7  | 0 | Low-quality    | Genome-fragment | 12.51 | 0     |
| S8_extracted_k141_96734   | 4303  | No  | NA   | 0  | 0 | Not-determined | Genome-fragment | NA    | 0     |
| S8_extracted_k141_10241   | 1038  | No  | NA   | 0  | 1 | Not-determined | Genome-fragment | NA    | 0     |
| S8_extracted_k141_105388  | 1260  | No  | NA   | 0  | 1 | Not-determined | Genome-fragment | NA    | 0     |
| S8_extracted_k141_18417   | 2270  | No  | NA   | 0  | 2 | Not-determined | Genome-fragment | NA    | 0     |
| S8_extracted_k141_105403  | 1043  | No  | NA   | 0  | 1 | Not-determined | Genome-fragment | NA    | 0     |
| S8_extracted_k141_111524  | 1419  | No  | NA   | 0  | 1 | Not-determined | Genome-fragment | NA    | 0     |
| S8_extracted_k141_27513   | 1679  | No  | NA   | 0  | 1 | Not-determined | Genome-fragment | NA    | 0     |
| S16_vs_97287[full]        | 7512  | No  | NA   | 0  | 1 | Low-quality    | Genome-fragment | 13.54 | 0     |
| S8_extracted_k141_200562  | 1122  | No  | NA   | 0  | 0 | Not-determined | Genome-fragment | NA    | 0     |
| S8_extracted_k141_114008  | 1550  | No  | NA   | 0  | 1 | Not-determined | Genome-fragment | NA    | 0     |
| S8_extracted_k141_27523   | 2437  | No  | NA   | 0  | 1 | Not-determined | Genome-fragment | NA    | 0     |
| S8_extracted_k141_88168   | 4642  | No  | NA   | 0  | 0 | Not-determined | Genome-fragment | NA    | 0     |
| S5_vs_k141_111530[full]   | 7516  | No  | NA   | 4  | 0 | Low-quality    | Genome-fragment | 16.21 | 0     |
| S8_extracted_k141_192460  | 1097  | No  | NA   | 0  | 0 | Not-determined | Genome-fragment | NA    | 0     |
| S8_extracted_k141_96769   | 1887  | No  | NA   | 0  | 1 | Not-determined | Genome-fragment | NA    | 0     |
| S1_vs_k141_102519[full]   | 7517  | No  | NA   | 0  | 0 | Low-quality    | Genome-fragment | 17.89 | 0     |
| S8_extracted_k141_148800  | 2201  | No  | NA   | 0  | 0 | Not-determined | Genome-fragment | NA    | 0     |
| S12_vs_k141_19502[full]   | 7519  | No  | NA   | 1  | 0 | Low-quality    | Genome-fragment | 6.96  | 0     |
| S8_extracted_k141_79496   | 1315  | No  | NA   | 0  | 0 | Not-determined | Genome-fragment | NA    | 0     |
| S8_vs_k141_14594[full]    | 7523  | No  | NA   | 0  | 1 | Low-quality    | Genome-fragment | 8.89  | 0     |
| S8_extracted_k141_140182  | 1036  | No  | NA   | 0  | 1 | Not-determined | Genome-fragment | NA    | 0     |
| S8_extracted_k141_114043  | 1277  | No  | NA   | 0  | 2 | Not-determined | Genome-fragment | NA    | 0     |
| S8_extracted_k141_166192  | 1214  | No  | NA   | 0  | 1 | Not-determined | Genome-fragment | NA    | 0     |
| S8_extracted_k141_192478  | 3307  | No  | NA   | 0  | 1 | Not-determined | Genome-fragment | NA    | 0     |
| S8_extracted_k141_115136  | 3327  | No  | NA   | 0  | 1 | Not-determined | Genome-fragment | NA    | 0     |
| S8_extracted_k141_192484  | 1397  | No  | NA   | 0  | 0 | Not-determined | Genome-fragment | NA    | 0     |
| S8_extracted_k141_53480   | 1298  | No  | NA   | 0  | 3 | Not-determined | Genome-fragment | NA    | 0     |
| S16_vs_53992[full]        | 7526  | No  | NA   | 0  | 1 | Low-quality    | Genome-fragment | 15.16 | 0     |
| S8_extracted_k141_140215  | 1164  | No  | NA   | 0  | 0 | Not-determined | Genome-fragment | NA    | 0     |
| S8_extracted_k141_1477    | 8201  | No  | NA   | 0  | 1 | Not-determined | Genome-fragment | NA    | 0     |
| S8_extracted_k141_36182   | 4314  | No  | NA   | 0  | 2 | Not-determined | Genome-fragment | NA    | 0     |
| S8_extracted_k141_105460  | 2218  | No  | NA   | 0  | 1 | Not-determined | Genome-fragment | NA    | 0     |
| S8_extracted_k141_131548  | 6275  | No  | NA   | 0  | 4 | Not-determined | Genome-fragment | NA    | 0     |
| S8_extracted_k141_88211   | 1161  | No  | NA   | 0  | 0 | Not-determined | Genome-fragment | NA    | 0     |
| S8_vs_k141_180088[full]   | 7527  | No  | NA   | 0  | 0 | Low-quality    | Genome-fragment | 17.21 | 0     |
| S1_vs_k141_47904[full]    | 7529  | No  | NA   | 0  | 0 | Low-quality    | Genome-fragment | 19.68 | 0     |
| S8_extracted_k141_36197   | 3511  | No  | NA   | 0  | 2 | Not-determined | Genome-fragment | NA    | 0     |
| S8_extracted_k141_36199   | 1371  | No  | NA   | 0  | 1 | Not-determined | Genome-fragment | NA    | 0     |
| S8_extracted_k141_27591   | 1316  | No  | NA   | 0  | 0 | Not-determined | Genome-fragment | NA    | 0     |
| S8_extracted_k141_174685  | 1115  | No  | NA   | 0  | 0 | Not-determined | Genome-fragment | NA    | 0     |
| S8_extracted_k141_36217   | 1466  | No  | NA   | 0  | 1 | Not-determined | Genome-fragment | NA    | 0     |
| S8_extracted_k141_200593  | 1934  | No  | NA   | 0  | 2 | Not-determined | Genome-fragment | NA    | 0     |
| S17_vs_k141_74660[full]   | 7539  | Yes | 5263 | 1  | 1 | Low-quality    | Genome-fragment | 8.21  | 30.19 |
| S8_extracted_k141_27607   | 3096  | No  | NA   | 0  | 2 | Not-determined | Genome-fragment | NA    | 0     |
| S8_extracted_k141_1518    | 1878  | No  | NA   | 0  | 2 | Not-determined | Genome-fragment | NA    | 0     |
| S8_extracted_k141_174694  | 1147  | No  | NA   | 0  | 1 | Not-determined | Genome-fragment | NA    | 0     |
| S5_vs_k141_3511[full]     | 7541  | No  | NA   | 0  | 1 | Low-quality    | Genome-fragment | 12.48 | 0     |
| S8_vs_k141_204791[full]   | 7542  | No  | NA   | 2  | 1 | Low-quality    | Genome-fragment | 13.28 | 0     |
| S3_vs_k141_511301[full]   | 7543  | No  | NA   | 0  | 0 | Low-quality    | Genome-fragment | 13.71 | 0     |
| S8_extracted_k141_96879   | 4498  | No  | NA   | 0  | 1 | Not-determined | Genome-fragment | NA    | 0     |
| S8_extracted_k141_96880   | 3001  | No  | NA   | 0  | 3 | Not-determined | Genome-fragment | NA    | 0     |
| S8_extracted_k141_15130   | 2267  | No  | NA   | 0  | 0 | Not-determined | Genome-fragment | NA    | 0     |
| S8_extracted_k141_36263   | 1353  | No  | NA   | 0  | 0 | Not-determined | Genome-fragment | NA    | 0     |
| S8_extracted_k141_79597   | 1240  | No  | NA   | 0  | 1 | Not-determined | Genome-fragment | NA    | 0     |
| S8_extracted_k141_122960  | 1067  | No  | NA   | 0  | 0 | Not-determined | Genome-fragment | NA    | 0     |
| S8_extracted_k141_143140  | 7544  | No  | NA   | 0  | 1 | Low-quality    | Genome-fragment | 13.5  | 0     |
| S8_extracted_k141_27643   | 2118  | No  | NA   | 0  | 0 | Not-determined | Genome-fragment | NA    | 0     |
| S8_extracted_k141_122969  | 1320  | No  | NA   | 0  | 1 | Not-determined | Genome-fragment | NA    | 0     |
| S8_extracted_k141_185370  | 1852  | No  | NA   | 0  | 2 | Not-determined | Genome-fragment | NA    | 0     |
| S1_vs_k141_90691[full]    | 7546  | No  | NA   | 2  | 0 | Low-quality    | Genome-fragment | 18.83 | 0     |
| S8_extracted_k141_36266   | 11658 | No  | NA   | 0  | 4 | Not-determined | Genome-fragment | NA    | 0     |
| S5_vs_k141_122351[full]   | 7548  | No  | NA   | 0  | 0 | Low-quality    | Genome-fragment | 11.29 | 0     |
| S5_vs_k141_342[full]      | 7557  | Yes | 4665 | 2  | 1 | Low-quality    | Genome-fragment | 4.93  | 38.27 |
| S17_vs_k141_111801[full]  | 7558  | No  | NA   | 4  | 0 | Low-quality    | Genome-fragment | 9.57  | 0     |
| S3_vs_k141_63508[full]    | 7565  | No  | NA   | 1  | 0 | Low-quality    | Genome-fragment | 3.26  | 0     |
| S8_vs_k141_188175[full]   | 7569  | No  | NA   | 1  | 0 | Low-quality    | Genome-fragment | 14.74 | 0     |
| S8_extracted_k141_183184  | 1349  | No  | NA   | 0  | 0 | Not-determined | Genome-fragment | NA    | 0     |
| S8_extracted_k141_96906   | 3232  | No  | NA   | 0  | 1 | Not-determined | Genome-fragment | NA    | 0     |
| S8_extracted_k141_51551   | 3277  | No  | NA   | 0  | 1 | Not-determined | Genome-fragment | NA    | 0     |
| S8_extracted_k141_140321  | 1062  | No  | NA   | 0  | 1 | Not-determined | Genome-fragment | NA    | 0     |
| S16_extracted_3148        | 7572  | No  | NA   | 1  | 0 | Low-quality    | Genome-fragment | 7.05  | 0     |
| S8_extracted_k141_79621   | 1298  | No  | NA   | 0  | 1 | Not-determined | Genome-fragment | NA    | 0     |
| S8_extracted_k141_166289  | 1219  | No  | NA   | 0  | 0 | Not-determined | Genome-fragment | NA    | 0     |
| S8_extracted_k141_174748  | 1256  | No  | NA   | 0  | 2 | Not-determined | Genome-fragment | NA    | 0     |
| S8_extracted_k141_183151  | 2207  | No  | NA   | 0  | 1 | Not-determined | Genome-fragment | NA    | 0     |
| S8_extracted_k141_18605   | 2356  | No  | NA   | 0  | 0 | Not-determined | Genome-fragment | NA    | 0     |
| S8_extracted_k141_183193  | 1467  | No  | NA   | 0  | 2 | Not-determined | Genome-fragment | NA    | 0     |
| S8_extracted_k141_115169  | 5179  | No  | NA   | 0  | 3 | Not-determined | Genome-fragment | NA    | 0     |
| S8_extracted_k141_174753  | 3436  | No  | NA   | 0  | 0 | Not-determined | Genome-fragment | NA    | 0     |
| S11_vs_k141_23558[full]   | 7573  | No  | NA   | 4  | 0 | Low-quality    | Genome-fragment | 17.75 | 0     |
| S11_extracted_k141_23820  | 7576  | No  | NA   | 0  | 3 | Low-quality    | Genome-fragment | 4.98  | 0     |
| S14_vs_k141_76580[full]   | 7579  | No  | NA   | 0  | 0 | Low-quality    | Genome-fragment | 17.84 | 0     |
| S8_extracted_k141_157536  | 2498  | No  | NA   | 0  | 2 | Not-determined | Genome-fragment | NA    | 0     |
| S8_extracted_k141_44619   | 1832  | No  | NA   | 0  | 1 | Not-determined | Genome-fragment | NA    | 0     |
| S8_extracted_k141_15178   | 1112  | No  | NA   | 0  | 0 | Not-determined | Genome-fragment | NA    | 0     |
| S8_extracted_k141_70660   | 1198  | No  | NA   | 0  | 0 | Not-determined | Genome-fragment | NA    | 0     |
| S8_extracted_k141_27674   | 1209  | No  | NA   | 0  | 1 | Not-determined | Genome-fragment | NA    | 0     |
| S8_extracted_k141_55589   | 1897  | No  | NA   | 0  | 1 | Not-determined | Genome-fragment | NA    | 0     |
| S8_vs_k141_17506[full]    | 7583  | No  | NA   | 0  | 0 | Low-quality    | Genome-fragment | 6.63  | 0     |
| S8_extracted_k141_131601  | 1523  | No  | NA   | 0  | 0 | Not-determined | Genome-fragment | NA    | 0     |
| S8_extracted_k141_18630   | 2131  | No  | NA   | 0  | 2 | Not-determined | Genome-fragment | NA    | 0     |
| S8_extracted_k141_148914  | 1977  | No  | NA   | 0  | 1 | Not-determined | Genome-fragment | NA    | 0     |
| S8_extracted_k141_122881  | 3181  | No  | NA   | 0  | 1 | Not-determined | Genome-fragment | NA    | 0     |
| S8_extracted_k141_148915  | 2473  | No  | NA   | 0  | 2 | Not-determined | Genome-fragment | NA    | 0     |
| S8_extracted_k141_131609  | 1094  | No  | NA   | 0  | 0 | Not-determined | Genome-fragment | NA    | 0     |
| S8_extracted_k141_140370  | 1275  | No  | NA   | 0  | 1 | Not-determined | Genome-fragment | NA    | 0     |
| S17_extracted_k141_115588 | 7585  | No  | NA   | 0  | 1 | Low-quality    | Genome-fragment | 16.32 | 0     |
| S8_extracted_k141_79710   | 2106  | No  | NA   | 0  | 1 | Not-determined | Genome-fragment | NA    | 0     |
| S8_extracted_k141_49757   | 7585  | No  | NA   | 1  | 1 | Low-quality    | Genome-fragment | 3.05  | 0     |
| S8_extracted_k141_62165   | 1073  | No  | NA   | 0  | 1 | Not-determined | Genome-fragment | NA    | 0     |
| S17_extracted_k141_14546  | 7586  | No  | NA   | 2  | 0 | Low-quality    | Genome-fragment | 16.99 | 0     |
| S8_extracted_k141_18650   | 1830  | No  | NA   | 0  | 2 | Not-determined | Genome-fragment | NA    | 0     |
| S8_extracted_k141_105593  | 1185  | No  | NA   | 0  | 2 | Not-determined | Genome-fragment | NA    | 0     |
| S8_extracted_k141_44684   | 1442  | No  | NA   | 0  | 1 | Not-determined | Genome-fragment | NA    | 0     |
| S12_extracted_k141_118610 | 7586  | No  | NA   | 0  | 1 | Low-quality    | Genome-fragment | 4.55  | 0     |
| S8_extracted_k141_180823  | 7586  | No  | NA   | 0  | 0 | Low-quality    | Genome-fragment | 5.7   | 0     |
| S8_extracted_k141_131617  | 1494  | No  | NA   | 0  | 0 | Not-determined | Genome-fragment | NA    | 0     |
| S8_extracted_k141_123017  | 5868  | No  | NA   | 0  | 2 | Not-determined | Genome-fragment | NA    | 0     |
| S8_extracted_k141_27726   | 1313  | No  | NA   | 0  | 1 | Not-determined | Genome-fragment | NA    | 0     |
| S8_extracted_k141_105610  | 3647  | No  | NA   | 0  | 2 | Not-determined | Genome-fragment | NA    | 0     |
| S8_extracted_k141_18673   | 1184  | No  | NA   | 0  | 2 | Not-determined | Genome-fragment | NA    | 0     |
| S8_extracted_k141_27727   | 9510  | No  | NA   | 0  | 1 | Not-determined | Genome-fragment | NA    | 0     |
| S8_extracted_k141_166341  | 3453  | No  | NA   | 0  | 2 | Not-determined | Genome-fragment | NA    | 0     |
| S8_extracted_k141_62202   | 1254  | No  | NA   | 0  | 0 | Not-determined | Genome-fragment | NA    | 0     |
| S8_extracted_k141_62207   | 1108  | No  | NA   | 0  | 0 | Not-determined | Genome-fragment | NA    | 0     |



|                          |       |     |    |      |   |                |                 |       |       |
|--------------------------|-------|-----|----|------|---|----------------|-----------------|-------|-------|
| 58_vs_k141_50273[full]   | 7598  | No  | NA | 0    | 0 | Low-quality    | Genome-fragment | 9.27  | 0     |
| 58_extracted_k141_123210 | 1453  | No  | NA | 0    | 2 | Not-determined | Genome-fragment | NA    | 0     |
| 56_vs_k141_50145[full]   | 7600  | No  | NA | 0    | 0 | Low-quality    | Genome-fragment | 8.32  | 0     |
| 58_extracted_k141_53683  | 1010  | No  | NA | 0    | 1 | Not-determined | Genome-fragment | NA    | 0     |
| 58_extracted_k141_183330 | 2507  | No  | NA | 0    | 2 | Not-determined | Genome-fragment | NA    | 0     |
| 58_extracted_k141_36438  | 1013  | No  | NA | 0    | 0 | Not-determined | Genome-fragment | NA    | 0     |
| 59_vs_k141_11174[full]   | 7611  | No  | NA | 6    | 0 | Low-quality    | Genome-fragment | 17.75 | 0     |
| 51_vs_k141_126746[full]  | 7611  | No  | NA | 2    | 0 | Low-quality    | Genome-fragment | 17.41 | 0     |
| 58_extracted_k141_166432 | 1738  | No  | NA | 0    | 1 | Not-determined | Genome-fragment | NA    | 0     |
| 58_extracted_k141_192676 | 1382  | No  | NA | 0    | 0 | Not-determined | Genome-fragment | NA    | 0     |
| 58_extracted_k141_157625 | 1193  | No  | NA | 0    | 1 | Not-determined | Genome-fragment | NA    | 0     |
| 58_extracted_k141_49104  | 7617  | No  | NA | 0    | 1 | Low-quality    | Genome-fragment | 2.94  | 0     |
| 58_extracted_k141_105724 | 4234  | No  | NA | 0    | 2 | Not-determined | Genome-fragment | NA    | 0     |
| 58_extracted_k141_157632 | 1024  | No  | NA | 0    | 0 | Not-determined | Genome-fragment | NA    | 0     |
| 58_extracted_k141_79769  | 6808  | No  | NA | 14   | 1 | Complete       | High-quality    | 100   | 0     |
| 58_extracted_k141_166448 | 1312  | No  | NA | 0    | 0 | Not-determined | Genome-fragment | NA    | 0     |
| 58_extracted_k141_36483  | 4062  | No  | NA | 0    | 3 | Not-determined | Genome-fragment | NA    | 0     |
| 58_extracted_k141_44772  | 1174  | No  | NA | 0    | 0 | Not-determined | Genome-fragment | NA    | 0     |
| 58_extracted_k141_98329  | 1058  | No  | NA | 0    | 0 | Not-determined | Genome-fragment | NA    | 0     |
| 58_extracted_k141_114335 | 2773  | No  | NA | 0    | 0 | Not-determined | Genome-fragment | NA    | 0     |
| 58_extracted_k141_123162 | 1072  | No  | NA | 0    | 1 | Not-determined | Genome-fragment | NA    | 0     |
| 58_extracted_k141_98333  | 3237  | No  | NA | 0    | 1 | Not-determined | Genome-fragment | NA    | 0     |
| 58_extracted_k141_114342 | 1023  | No  | NA | 0    | 0 | Not-determined | Genome-fragment | NA    | 0     |
| 53_vs_k141_91452[full]   | 7621  | Yes | NA | 4385 | 2 | 1 Low-quality  | Genome-fragment | 5.04  | 42.46 |
| 58_extracted_k141_123168 | 1005  | No  | NA | 0    | 0 | Not-determined | Genome-fragment | NA    | 0     |
| 58_extracted_k141_114345 | 6385  | No  | NA | 0    | 5 | Not-determined | Genome-fragment | NA    | 0     |
| 58_extracted_k141_79789  | 1781  | No  | NA | 0    | 0 | Not-determined | Genome-fragment | NA    | 0     |
| 58_extracted_k141_166482 | 1767  | No  | NA | 0    | 1 | Not-determined | Genome-fragment | NA    | 0     |
| 53_extracted_k141_10430  | 7622  | No  | NA | 0    | 0 | Low-quality    | Genome-fragment | 16.19 | 0     |
| 58_extracted_k141_44774  | 2024  | No  | NA | 0    | 1 | Not-determined | Genome-fragment | NA    | 0     |
| 58_extracted_k141_88360  | 1045  | No  | NA | 0    | 0 | Not-determined | Genome-fragment | NA    | 0     |
| 58_extracted_k141_97152  | 1062  | No  | NA | 0    | 0 | Not-determined | Genome-fragment | NA    | 0     |
| 58_extracted_k141_88373  | 1120  | No  | NA | 0    | 0 | Not-determined | Genome-fragment | NA    | 0     |
| 58_extracted_k141_166500 | 1228  | No  | NA | 0    | 0 | Not-determined | Genome-fragment | NA    | 0     |
| 58_extracted_k141_36519  | 1840  | No  | NA | 0    | 1 | Not-determined | Genome-fragment | NA    | 0     |
| 58_extracted_k141_157665 | 3717  | No  | NA | 0    | 2 | Not-determined | Genome-fragment | NA    | 0     |
| 58_extracted_k141_119663 | 7623  | No  | NA | 3    | 1 | Low-quality    | Genome-fragment | 7.63  | 0     |
| 58_extracted_k141_27846  | 1413  | No  | NA | 0    | 1 | Not-determined | Genome-fragment | NA    | 0     |
| 58_extracted_k141_157666 | 3106  | No  | NA | 0    | 1 | Not-determined | Genome-fragment | NA    | 0     |
| 514_extracted_k141_39652 | 7624  | No  | NA | 8    | 0 | Low-quality    | Genome-fragment | 16.54 | 0     |
| 58_extracted_k141_192724 | 15073 | No  | NA | 5    | 0 | Medium-quality | Genome-fragment | 50.58 | 0     |
| 58_extracted_k141_114362 | 3671  | No  | NA | 0    | 2 | Not-determined | Genome-fragment | NA    | 0     |
| 59_extracted_k141_42726  | 7629  | No  | NA | 1    | 1 | Low-quality    | Genome-fragment | 16    | 0     |
| 58_extracted_k141_36535  | 5061  | No  | NA | 0    | 2 | Not-determined | Genome-fragment | NA    | 0     |
| 58_extracted_k141_114363 | 4265  | No  | NA | 0    | 0 | Not-determined | Genome-fragment | NA    | 0     |
| 57_vs_46372[full]        | 7631  | No  | NA | 0    | 0 | Low-quality    | Genome-fragment | 16.56 | 0     |
| 517_extracted_k141_54664 | 7632  | No  | NA | 0    | 0 | Low-quality    | Genome-fragment | 26.46 | 0     |
| 58_extracted_k141_157700 | 1751  | No  | NA | 0    | 1 | Not-determined | Genome-fragment | NA    | 0     |
| 58_extracted_k141_166536 | 1927  | No  | NA | 0    | 0 | Not-determined | Genome-fragment | NA    | 0     |
| 58_extracted_k141_140547 | 7530  | No  | NA | 0    | 4 | Not-determined | Genome-fragment | NA    | 0     |
| 58_extracted_k141_1767   | 1003  | No  | NA | 0    | 0 | Not-determined | Genome-fragment | NA    | 0     |
| 55_extracted_k141_859    | 7636  | No  | NA | 0    | 1 | Low-quality    | Genome-fragment | 7.17  | 0     |
| 58_extracted_k141_192761 | 1613  | No  | NA | 0    | 1 | Not-determined | Genome-fragment | NA    | 0     |
| 53_extracted_k141_84325  | 7637  | No  | NA | 2    | 0 | Low-quality    | Genome-fragment | 16.09 | 0     |
| 58_extracted_k141_176589 | 1035  | No  | NA | 0    | 1 | Not-determined | Genome-fragment | NA    | 0     |
| 58_vs_k141_189953[full]  | 7638  | No  | NA | 3    | 1 | Low-quality    | Genome-fragment | 5.5   | 0     |
| 58_extracted_k141_114399 | 1227  | No  | NA | 0    | 1 | Not-determined | Genome-fragment | NA    | 0     |
| 58_extracted_k141_1782   | 1360  | No  | NA | 0    | 0 | Not-determined | Genome-fragment | NA    | 0     |
| 58_extracted_k141_36583  | 1402  | No  | NA | 0    | 0 | Not-determined | Genome-fragment | NA    | 0     |
| 58_extracted_k141_18885  | 2425  | No  | NA | 0    | 1 | Not-determined | Genome-fragment | NA    | 0     |
| 58_extracted_k141_175053 | 4247  | No  | NA | 0    | 4 | Not-determined | Genome-fragment | NA    | 0     |
| 58_extracted_k141_114415 | 1788  | No  | NA | 0    | 2 | Not-determined | Genome-fragment | NA    | 0     |
| 58_extracted_k141_97201  | 5625  | No  | NA | 0    | 5 | Not-determined | Genome-fragment | NA    | 0     |
| 58_extracted_k141_1800   | 1627  | No  | NA | 0    | 0 | Not-determined | Genome-fragment | NA    | 0     |
| 58_extracted_k141_175062 | 2673  | No  | NA | 0    | 0 | Not-determined | Genome-fragment | NA    | 0     |
| 58_extracted_k141_1802   | 2022  | No  | NA | 0    | 0 | Not-determined | Genome-fragment | NA    | 0     |
| 58_extracted_k141_192795 | 5328  | No  | NA | 0    | 1 | Not-determined | Genome-fragment | NA    | 0     |
| 58_extracted_k141_18911  | 1410  | No  | NA | 0    | 0 | Not-determined | Genome-fragment | NA    | 0     |
| 58_extracted_k141_149012 | 1320  | No  | NA | 0    | 0 | Not-determined | Genome-fragment | NA    | 0     |
| 58_extracted_k141_97218  | 1105  | No  | NA | 0    | 0 | Not-determined | Genome-fragment | NA    | 0     |
| 58_extracted_k141_157719 | 1619  | No  | NA | 0    | 1 | Not-determined | Genome-fragment | NA    | 0     |
| 58_extracted_k141_18340  | 1352  | No  | NA | 0    | 0 | Not-determined | Genome-fragment | NA    | 0     |
| 58_extracted_k141_149026 | 1511  | No  | NA | 0    | 0 | Not-determined | Genome-fragment | NA    | 0     |
| 58_extracted_k141_53878  | 3795  | No  | NA | 0    | 3 | Not-determined | Genome-fragment | NA    | 0     |
| 58_extracted_k141_166603 | 1345  | No  | NA | 0    | 0 | Not-determined | Genome-fragment | NA    | 0     |
| 58_extracted_k141_200938 | 3554  | No  | NA | 0    | 1 | Not-determined | Genome-fragment | NA    | 0     |
| 58_extracted_k141_183425 | 1276  | No  | NA | 0    | 1 | Not-determined | Genome-fragment | NA    | 0     |
| 58_extracted_k141_62370  | 4228  | No  | NA | 0    | 5 | Not-determined | Genome-fragment | NA    | 0     |
| 58_extracted_k141_62372  | 1244  | No  | NA | 0    | 0 | Not-determined | Genome-fragment | NA    | 0     |
| 58_extracted_k141_123272 | 1116  | No  | NA | 0    | 1 | Not-determined | Genome-fragment | NA    | 0     |
| 53_vs_k141_104660[full]  | 7643  | No  | NA | 2    | 0 | Low-quality    | Genome-fragment | 5.22  | 0     |
| 53_vs_k141_63866[full]   | 7647  | No  | NA | 0    | 1 | Low-quality    | Genome-fragment | 16.24 | 0     |
| 58_extracted_k141_62380  | 3365  | No  | NA | 0    | 2 | Not-determined | Genome-fragment | NA    | 0     |
| 517_vs_k141_55871[full]  | 7650  | No  | NA | 1    | 1 | Low-quality    | Genome-fragment | 9.95  | 0     |
| 55_vs_k141_1422200[full] | 7651  | No  | NA | 2    | 0 | Low-quality    | Genome-fragment | 15.61 | 0     |
| 58_extracted_k141_1839   | 1581  | No  | NA | 0    | 0 | Not-determined | Genome-fragment | NA    | 0     |
| 58_extracted_k141_149070 | 1253  | No  | NA | 0    | 0 | Not-determined | Genome-fragment | NA    | 0     |
| 58_extracted_k141_183442 | 1438  | No  | NA | 0    | 1 | Not-determined | Genome-fragment | NA    | 0     |
| 58_extracted_k141_131802 | 9043  | No  | NA | 16   | 2 | Medium-quality | Genome-fragment | 64.45 | 0     |
| 510_extracted_13386      | 7652  | No  | NA | 0    | 2 | Low-quality    | Genome-fragment | 7.08  | 0     |
| 58_extracted_k141_70763  | 1094  | No  | NA | 0    | 1 | Not-determined | Genome-fragment | NA    | 0     |
| 58_extracted_k141_132392 | 2722  | No  | NA | 0    | 0 | Not-determined | Genome-fragment | NA    | 0     |
| 58_extracted_k141_131820 | 1403  | No  | NA | 0    | 1 | Not-determined | Genome-fragment | NA    | 0     |
| 58_extracted_k141_97293  | 1654  | No  | NA | 0    | 0 | Not-determined | Genome-fragment | NA    | 0     |
| 58_extracted_k141_192846 | 4310  | No  | NA | 0    | 1 | Not-determined | Genome-fragment | NA    | 0     |
| 57_extracted_93746       | 7655  | No  | NA | 0    | 1 | Low-quality    | Genome-fragment | 16.99 | 0     |
| 516_extracted_145611     | 7658  | No  | NA | 3    | 1 | Low-quality    | Genome-fragment | 11.91 | 0     |
| 511_extracted_k141_135   | 7659  | No  | NA | 4    | 0 | Low-quality    | Genome-fragment | 12.45 | 0     |
| 58_extracted_k141_18964  | 1077  | No  | NA | 0    | 0 | Not-determined | Genome-fragment | NA    | 0     |
| 58_extracted_k141_131835 | 1134  | No  | NA | 0    | 2 | Not-determined | Genome-fragment | NA    | 0     |
| 58_extracted_k141_79892  | 3156  | No  | NA | 0    | 3 | Not-determined | Genome-fragment | NA    | 0     |
| 58_extracted_k141_105875 | 3567  | No  | NA | 0    | 2 | Not-determined | Genome-fragment | NA    | 0     |
| 58_extracted_k141_10253  | 4009  | No  | NA | 0    | 1 | Not-determined | Genome-fragment | NA    | 0     |
| 58_extracted_k141_72161  | 7662  | No  | NA | 0    | 3 | Low-quality    | Genome-fragment | 4.53  | 0     |
| 51_extracted_k141_11744  | 7665  | No  | NA | 0    | 0 | Low-quality    | Genome-fragment | 16.98 | 0     |
| 58_extracted_k141_140679 | 1346  | No  | NA | 0    | 1 | Not-determined | Genome-fragment | NA    | 0     |
| 58_extracted_k141_200971 | 2817  | No  | NA | 0    | 2 | Not-determined | Genome-fragment | NA    | 0     |
| 58_extracted_k141_10259  | 8038  | No  | NA | 0    | 4 | Not-determined | Genome-fragment | NA    | 0     |
| 58_extracted_k141_200975 | 1153  | No  | NA | 0    | 0 | Not-determined | Genome-fragment | NA    | 0     |
| 58_extracted_k141_53947  | 8390  | No  | NA | 0    | 3 | Not-determined | Genome-fragment | NA    | 0     |
| 512_vs_k141_28329[full]  | 7666  | No  | NA | 1    | 2 | Low-quality    | Genome-fragment | 8.85  | 0     |
| 58_extracted_k141_27934  | 5549  | No  | NA | 0    | 0 | Not-determined | Genome-fragment | NA    | 0     |
| 58_extracted_k141_114516 | 4409  | No  | NA | 0    | 1 | Not-determined | Genome-fragment | NA    | 0     |
| 58_extracted_k141_53950  | 1034  | No  | NA | 0    | 0 | Not-determined | Genome-fragment | NA    | 0     |
| 58_extracted_k141_13186  | 1168  | No  | NA | 0    | 0 | Not-determined | Genome-fragment | NA    | 0     |
| 58_extracted_k141_79919  | 1513  | No  | NA | 0    | 0 | Not-determined | Genome-fragment | NA    | 0     |
| 56_extracted_k141_38259  | 7667  | No  | NA | 1    | 0 | Low-quality    | Genome-fragment | 5.56  | 0     |
| 58_extracted_k141_44948  | 2086  | No  | NA | 0    | 3 | Not-determined | Genome-fragment | NA    | 0     |
| 58_extracted_k141_18982  | 2971  | No  | NA | 0    | 4 | Not-determined | Genome-fragment | NA    | 0     |
| 53_vs_k141_23594[full]   | 7668  | No  | NA | 2    | 0 | Low-quality    | Genome-fragment | 19.39 | 0     |
| 58_extracted_k141_131877 | 1029  | No  | NA | 0    | 0 | Not-determined | Genome-fragment | NA    | 0     |
| 58_extracted_k141_70807  | 1228  | No  | NA | 0    | 0 | Not-determined | Genome-fragment | NA    | 0     |
| 58_extracted_k141_88547  | 1212  | No  | NA | 0    | 1 | Not-determined | Genome-fragment | NA    | 0     |
| 58_extracted_k141_10280  | 3222  | No  | NA | 0    | 2 | Not-determined | Genome-fragment | NA    | 0     |
| 58_extracted_k141_140659 | 3649  | No  | NA | 0    | 1 | Not-determined | Genome-fragment | NA    | 0     |
| 58_extracted_k141_53969  | 1210  | No  | NA | 0    | 0 | Not-determined | Genome-fragment | NA    | 0     |
| 58_extracted_k141_10284  | 1241  | No  | NA | 0    | 0 | Not-determined | Genome-fragment | NA    | 0     |
| 58_extracted_k141_105900 | 6296  | No  | NA | 0    | 4 | Not-determined | Genome-fragment | NA    | 0     |
| 58_extracted_k141_201009 | 1378  | No  | NA | 0    | 0 | Not-determined | Genome-fragment | NA    | 0     |
| 58_extracted_k141_36708  | 4155  | No  | NA | 0    | 1 | Not-determined | Genome-fragment | NA    | 0     |
| 512_extracted_k141_76882 | 7671  | No  | NA | 1    | 1 | Low-quality    | Genome-fragment | 5.63  | 0     |
| 58_extracted_k141_149167 | 1244  | No  | NA | 0    | 0 | Not-determined | Genome-fragment | NA    | 0     |
| 58_extracted_k141_70819  | 3037  | No  | NA | 0    | 1 | Not-determined | Genome-fragment | NA    | 0     |
| 58_extracted_k141_131924 | 1223  | No  | NA | 0    | 1 | Not-determined | Genome-fragment | NA    | 0     |
| 58_extracted_k141_36723  | 1007  | No  | NA | 0    | 1 | Not-determined | Genome-fragment | NA    | 0     |
| 58_extracted_k141_36725  | 3608  | No  | NA | 0    | 3 | Not-determined | Genome-fragment | NA    | 0     |
| 512_vs_k141_160426[full] | 7671  | Yes | NA | 2663 | 1 | 2 Low-quality  | Genome-fragment | 3.08  | 65.28 |
| 58_extracted_k141_201041 | 5323  | No  | NA | 0    | 1 | Not-determined | Genome-fragment | NA    | 0     |
| 517_extracted_k141_47459 | 7673  | No  | NA | 0    | 0 | Low-quality    | Genome-fragment | 12.87 | 0     |
| 516_extracted_125130     | 7675  | No  | NA | 6    | 0 | Low-quality    | Genome-fragment | 20.66 | 0     |
| 510_vs_106371[full]      | 7677  | No  | NA | 0    | 5 | Low-quality    | Genome-fragment | 0.91  | 0     |
| 58_extracted_k141_79988  | 1695  | No  | NA | 0    | 1 | Not-determined | Genome-fragment | NA    | 0     |
| 58_extracted_k141_131940 | 1157  | No  | NA | 0    | 0 | Not-determined | Genome-fragment | NA    | 0     |
| 58_extracted_k141_70837  | 1849  | No  |    |      |   |                |                 |       |       |



|                          |       |     |    |    |   |                |                 |       |       |
|--------------------------|-------|-----|----|----|---|----------------|-----------------|-------|-------|
| 58_extracted_k141_88637  | 1323  | No  | NA | 0  | 1 | Not-determined | Genome-fragment | NA    | 0     |
| 58_extracted_k141_201080 | 1061  | No  | NA | 0  | 0 | Not-determined | Genome-fragment | NA    | 0     |
| 58_extracted_k141_88652  | 1213  | No  | NA | 0  | 0 | Not-determined | Genome-fragment | NA    | 0     |
| 58_extracted_k141_19095  | 1245  | No  | NA | 0  | 0 | Not-determined | Genome-fragment | NA    | 0     |
| 58_extracted_k141_1915   | 1616  | No  | NA | 0  | 0 | Not-determined | Genome-fragment | NA    | 0     |
| 58_extracted_k141_113448 | 1661  | No  | NA | 0  | 1 | Not-determined | Genome-fragment | NA    | 0     |
| 58_extracted_k141_166677 | 92899 | No  | NA | 11 | 0 | High-quality   | Genome-fragment | 96.85 | 0     |
| 58_extracted_k141_149297 | 1290  | No  | NA | 0  | 0 | Not-determined | Genome-fragment | NA    | 0     |
| 58_extracted_k141_114631 | 1301  | No  | NA | 0  | 1 | Not-determined | Genome-fragment | NA    | 0     |
| 58_extracted_k141_140776 | 1252  | No  | NA | 0  | 0 | Not-determined | Genome-fragment | NA    | 0     |
| 58_extracted_k141_201091 | 3620  | No  | NA | 0  | 2 | Not-determined | Genome-fragment | NA    | 0     |
| 512_vs_k141_157861[Full] | 7679  | No  | NA | 0  | 1 | Low-quality    | Genome-fragment | 3.25  | 0     |
| 58_extracted_k141_28131  | 1457  | No  | NA | 0  | 0 | Not-determined | Genome-fragment | NA    | 0     |
| 58_extracted_k141_149308 | 1363  | No  | NA | 0  | 1 | Not-determined | Genome-fragment | NA    | 0     |
| 511_vs_k141_2696[Full]   | 7683  | No  | NA | 2  | 0 | Low-quality    | Genome-fragment | 17.05 | 0     |
| 58_extracted_k141_149309 | 1731  | No  | NA | 0  | 1 | Not-determined | Genome-fragment | NA    | 0     |
| 58_extracted_k141_149310 | 1013  | No  | NA | 0  | 0 | Not-determined | Genome-fragment | NA    | 0     |
| 516_vs_130649[Full]      | 7687  | No  | NA | 0  | 4 | Low-quality    | Genome-fragment | 4.06  | 0     |
| 58_extracted_k141_149317 | 1628  | No  | NA | 0  | 0 | Not-determined | Genome-fragment | NA    | 0     |
| 59_vs_k141_26115[Full]   | 7688  | No  | NA | 6  | 0 | Low-quality    | Genome-fragment | 16.71 | 0     |
| 58_extracted_k141_192989 | 1626  | No  | NA | 0  | 1 | Not-determined | Genome-fragment | NA    | 0     |
| 55_extracted_k141_22241  | 7700  | No  | NA | 7  | 0 | Low-quality    | Genome-fragment | 15.37 | 0     |
| 58_extracted_k141_203322 | 7700  | No  | NA | 0  | 6 | Low-quality    | Genome-fragment | 2.41  | 0     |
| 58_extracted_k141_183632 | 3369  | No  | NA | 0  | 1 | Not-determined | Genome-fragment | NA    | 0     |
| 58_extracted_k141_10446  | 1049  | No  | NA | 0  | 1 | Not-determined | Genome-fragment | NA    | 0     |
| 58_extracted_k141_1950   | 1288  | No  | NA | 0  | 1 | Not-determined | Genome-fragment | NA    | 0     |
| 58_extracted_k141_19166  | 1079  | No  | NA | 0  | 1 | Not-determined | Genome-fragment | NA    | 0     |
| 58_extracted_k141_132028 | 1098  | No  | NA | 0  | 1 | Not-determined | Genome-fragment | NA    | 0     |
| 58_extracted_k141_62686  | 2463  | No  | NA | 0  | 1 | Not-determined | Genome-fragment | NA    | 0     |
| 58_extracted_k141_80126  | 1282  | No  | NA | 0  | 0 | Not-determined | Genome-fragment | NA    | 0     |
| 55_vs_k141_68869[Full]   | 7709  | No  | NA | 3  | 0 | Low-quality    | Genome-fragment | 17.38 | 0     |
| 58_extracted_k141_183669 | 1211  | No  | NA | 0  | 1 | Not-determined | Genome-fragment | NA    | 0     |
| 58_extracted_k141_106039 | 2008  | No  | NA | 0  | 2 | Not-determined | Genome-fragment | NA    | 0     |
| 58_extracted_k141_193021 | 7467  | No  | NA | 0  | 4 | Not-determined | Genome-fragment | NA    | 0     |
| 58_extracted_k141_1979   | 1667  | No  | NA | 0  | 0 | Not-determined | Genome-fragment | NA    | 0     |
| 58_extracted_k141_80129  | 4216  | No  | NA | 0  | 1 | Not-determined | Genome-fragment | NA    | 0     |
| 55_vs_k141_51908[Full]   | 7711  | No  | NA | 3  | 0 | Low-quality    | Genome-fragment | 18.57 | 0     |
| 512_vs_k141_63130[Full]  | 7712  | No  | NA | 0  | 5 | Low-quality    | Genome-fragment | 11.54 | 0     |
| 515_vs_75680[Full]       | 7712  | No  | NA | 0  | 0 | Low-quality    | Genome-fragment | 13.82 | 0     |
| 58_extracted_k141_166752 | 1759  | No  | NA | 0  | 1 | Not-determined | Genome-fragment | NA    | 0     |
| 58_extracted_k141_175263 | 3630  | No  | NA | 0  | 3 | Not-determined | Genome-fragment | NA    | 0     |
| 58_extracted_k141_193042 | 1277  | No  | NA | 0  | 1 | Not-determined | Genome-fragment | NA    | 0     |
| 58_extracted_k141_157948 | 3858  | No  | NA | 0  | 2 | Not-determined | Genome-fragment | NA    | 0     |
| 58_extracted_k141_54157  | 2998  | No  | NA | 0  | 4 | Not-determined | Genome-fragment | NA    | 0     |
| 58_extracted_k141_28182  | 2214  | No  | NA | 0  | 0 | Not-determined | Genome-fragment | NA    | 0     |
| 517_vs_k141_334620[Full] | 7717  | No  | NA | 0  | 1 | Low-quality    | Genome-fragment | 17.84 | 0     |
| 58_extracted_k141_36885  | 6353  | No  | NA | 0  | 7 | Not-determined | Genome-fragment | NA    | 0     |
| 511_vs_k141_59775[Full]  | 7721  | No  | NA | 0  | 0 | Low-quality    | Genome-fragment | 15.09 | 0     |
| 58_extracted_k141_114695 | 5246  | No  | NA | 0  | 3 | Not-determined | Genome-fragment | NA    | 0     |
| 58_extracted_k141_45127  | 3099  | No  | NA | 0  | 2 | Not-determined | Genome-fragment | NA    | 0     |
| 58_extracted_k141_157950 | 6948  | No  | NA | 0  | 2 | Not-determined | Genome-fragment | NA    | 0     |
| 58_extracted_k141_123520 | 2387  | No  | NA | 0  | 1 | Not-determined | Genome-fragment | NA    | 0     |
| 53_vs_k141_39841[Full]   | 7721  | No  | NA | 1  | 0 | Low-quality    | Genome-fragment | 20.22 | 0     |
| 58_extracted_99026       | 7725  | No  | NA | 6  | 0 | Low-quality    | Genome-fragment | 17.33 | 0     |
| 59_vs_k141_4328[Full]    | 7726  | No  | NA | 1  | 0 | Low-quality    | Genome-fragment | 7.99  | 0     |
| 58_extracted_k141_106094 | 1802  | No  | NA | 0  | 1 | Not-determined | Genome-fragment | NA    | 0     |
| 58_extracted_k141_114716 | 1234  | No  | NA | 0  | 1 | Not-determined | Genome-fragment | NA    | 0     |
| 58_extracted_k141_62660  | 1250  | No  | NA | 0  | 1 | Not-determined | Genome-fragment | NA    | 0     |
| 58_extracted_k141_201185 | 1661  | No  | NA | 0  | 3 | Not-determined | Genome-fragment | NA    | 0     |
| 58_extracted_k141_36939  | 5807  | No  | NA | 0  | 5 | Not-determined | Genome-fragment | NA    | 0     |
| 514_vs_k141_110264[Full] | 7727  | Yes | NA | 4  | 1 | Low-quality    | Genome-fragment | 8.87  | 25.51 |
| 58_extracted_k141_175309 | 1052  | No  | NA | 0  | 0 | Not-determined | Genome-fragment | NA    | 0     |
| 58_extracted_k141_80179  | 1318  | No  | NA | 0  | 0 | Not-determined | Genome-fragment | NA    | 0     |
| 58_extracted_k141_97447  | 1456  | No  | NA | 0  | 2 | Not-determined | Genome-fragment | NA    | 0     |
| 58_extracted_k141_106782 | 2628  | No  | NA | 0  | 0 | Not-determined | Genome-fragment | NA    | 0     |
| 58_extracted_k141_201191 | 1210  | No  | NA | 0  | 0 | Not-determined | Genome-fragment | NA    | 0     |
| 58_extracted_k141_45157  | 1752  | No  | NA | 0  | 2 | Not-determined | Genome-fragment | NA    | 0     |
| 512_vs_k141_150241[Full] | 7727  | No  | NA | 0  | 5 | Low-quality    | Genome-fragment | 5.48  | 0     |
| 58_extracted_k141_193047 | 7732  | No  | NA | 0  | 0 | Low-quality    | Genome-fragment | 7.87  | 0     |
| 55_extracted_k141_77482  | 7740  | No  | NA | 0  | 3 | Low-quality    | Genome-fragment | 16.44 | 0     |
| 58_extracted_k141_181690 | 7741  | No  | NA | 1  | 0 | Low-quality    | Genome-fragment | 7.71  | 0     |
| 58_extracted_k141_149410 | 3984  | No  | NA | 0  | 2 | Not-determined | Genome-fragment | NA    | 0     |
| 58_extracted_k141_114752 | 1270  | No  | NA | 0  | 0 | Not-determined | Genome-fragment | NA    | 0     |
| 55_vs_k141_67397[Full]   | 7742  | No  | NA | 2  | 0 | Low-quality    | Genome-fragment | 15.36 | 0     |
| 58_extracted_k141_2095   | 1953  | No  | NA | 0  | 2 | Not-determined | Genome-fragment | NA    | 0     |
| 55_vs_k141_112920[Full]  | 7747  | No  | NA | 2  | 0 | Low-quality    | Genome-fragment | 16.92 | 0     |
| 58_extracted_k141_114764 | 2602  | No  | NA | 0  | 2 | Not-determined | Genome-fragment | NA    | 0     |
| 58_extracted_k141_62715  | 1625  | No  | NA | 0  | 1 | Not-determined | Genome-fragment | NA    | 0     |
| 58_extracted_k141_19210  | 1990  | No  | NA | 0  | 0 | Not-determined | Genome-fragment | NA    | 0     |
| 58_extracted_k141_2074   | 2385  | No  | NA | 0  | 0 | Not-determined | Genome-fragment | NA    | 0     |
| 58_extracted_k141_28240  | 3035  | No  | NA | 0  | 0 | Not-determined | Genome-fragment | NA    | 0     |
| 58_extracted_k141_149427 | 2903  | No  | NA | 0  | 2 | Not-determined | Genome-fragment | NA    | 0     |
| 58_extracted_k141_183754 | 9936  | No  | NA | 0  | 5 | Not-determined | Genome-fragment | NA    | 0     |
| 58_extracted_k141_88839  | 1109  | No  | NA | 0  | 0 | Not-determined | Genome-fragment | NA    | 0     |
| 58_extracted_k141_183763 | 1502  | No  | NA | 0  | 0 | Not-determined | Genome-fragment | NA    | 0     |
| 54_extracted_20624       | 7748  | No  | NA | 3  | 0 | Low-quality    | Genome-fragment | 16.99 | 0     |
| 58_extracted_k141_140910 | 2362  | No  | NA | 0  | 0 | Not-determined | Genome-fragment | NA    | 0     |
| 58_extracted_k141_193132 | 1841  | No  | NA | 0  | 0 | Not-determined | Genome-fragment | NA    | 0     |
| 58_extracted_k141_45225  | 1563  | No  | NA | 0  | 0 | Not-determined | Genome-fragment | NA    | 0     |
| 58_extracted_k141_45227  | 1044  | No  | NA | 0  | 1 | Not-determined | Genome-fragment | NA    | 0     |
| 516_vs_157373[Full]      | 7749  | No  | NA | 0  | 0 | Low-quality    | Genome-fragment | 3.99  | 0     |
| 516_vs_157710[Full]      | 7752  | No  | NA | 0  | 1 | Low-quality    | Genome-fragment | 18.25 | 0     |
| 58_extracted_k141_166842 | 1992  | No  | NA | 0  | 1 | Not-determined | Genome-fragment | NA    | 0     |
| 512_vs_k141_104423[Full] | 7752  | No  | NA | 0  | 2 | Low-quality    | Genome-fragment | 1.87  | 0     |
| 58_extracted_k141_21210  | 1378  | No  | NA | 0  | 0 | Not-determined | Genome-fragment | NA    | 0     |
| 58_extracted_k141_201291 | 1077  | No  | NA | 0  | 1 | Not-determined | Genome-fragment | NA    | 0     |
| 514_vs_k141_37006[Full]  | 7757  | No  | NA | 0  | 0 | Low-quality    | Genome-fragment | 22.58 | 0     |
| 58_extracted_k141_201300 | 2467  | No  | NA | 0  | 1 | Not-determined | Genome-fragment | NA    | 0     |
| 58_extracted_k141_106210 | 1098  | No  | NA | 0  | 1 | Not-determined | Genome-fragment | NA    | 0     |
| 58_extracted_k141_114847 | 1964  | No  | NA | 0  | 1 | Not-determined | Genome-fragment | NA    | 0     |
| 58_extracted_k141_62796  | 2708  | No  | NA | 0  | 3 | Not-determined | Genome-fragment | NA    | 0     |
| 58_vs_k141_192815[Full]  | 7762  | Yes | NA | 0  | 2 | Low-quality    | Genome-fragment | 3.23  | 26.48 |
| 58_extracted_k141_201321 | 5089  | No  | NA | 0  | 1 | Not-determined | Genome-fragment | NA    | 0     |
| 58_extracted_k141_175453 | 1155  | No  | NA | 0  | 1 | Not-determined | Genome-fragment | NA    | 0     |
| 58_extracted_k141_158085 | 4044  | No  | NA | 0  | 1 | Not-determined | Genome-fragment | NA    | 0     |
| 53_extracted_k141_120468 | 7766  | No  | NA | 1  | 0 | Low-quality    | Genome-fragment | 5.31  | 0     |
| 58_extracted_k141_183815 | 1758  | No  | NA | 0  | 1 | Not-determined | Genome-fragment | NA    | 0     |
| 58_extracted_k141_77061  | 1039  | No  | NA | 0  | 0 | Not-determined | Genome-fragment | NA    | 0     |
| 58_extracted_k141_149075 | 4378  | No  | NA | 0  | 0 | Not-determined | Genome-fragment | NA    | 0     |
| 58_extracted_k141_54322  | 1899  | No  | NA | 0  | 1 | Not-determined | Genome-fragment | NA    | 0     |
| 58_extracted_k141_114891 | 1522  | No  | NA | 0  | 1 | Not-determined | Genome-fragment | NA    | 0     |
| 58_extracted_k141_201340 | 6486  | No  | NA | 0  | 1 | Not-determined | Genome-fragment | NA    | 0     |
| 58_extracted_k141_62819  | 1480  | No  | NA | 0  | 1 | Not-determined | Genome-fragment | NA    | 0     |
| 58_extracted_k141_45295  | 1227  | No  | NA | 0  | 1 | Not-determined | Genome-fragment | NA    | 0     |
| 516_vs_66649[Full]       | 7767  | No  | NA | 0  | 0 | Low-quality    | Genome-fragment | 12.02 | 0     |
| 58_extracted_k141_88959  | 1146  | No  | NA | 0  | 1 | Not-determined | Genome-fragment | NA    | 0     |
| 58_extracted_k141_201345 | 1091  | No  | NA | 0  | 0 | Not-determined | Genome-fragment | NA    | 0     |
| 58_extracted_k141_166906 | 8573  | No  | NA | 0  | 4 | Not-determined | Genome-fragment | NA    | 0     |
| 58_extracted_k141_132158 | 1603  | No  | NA | 0  | 2 | Not-determined | Genome-fragment | NA    | 0     |
| 58_extracted_k141_71092  | 1892  | No  | NA | 0  | 0 | Not-determined | Genome-fragment | NA    | 0     |
| 58_extracted_k141_168824 | 1110  | No  | NA | 0  | 2 | Not-determined | Genome-fragment | NA    | 0     |
| 58_extracted_k141_21480  | 3326  | No  | NA | 0  | 1 | Not-determined | Genome-fragment | NA    | 0     |
| 58_vs_k141_110614[Full]  | 7772  | No  | NA | 3  | 0 | Low-quality    | Genome-fragment | 6.27  | 0     |
| 58_extracted_k141_45318  | 1031  | No  | NA | 0  | 1 | Not-determined | Genome-fragment | NA    | 0     |
| 58_extracted_k141_193358 | 2155  | No  | NA | 0  | 2 | Not-determined | Genome-fragment | NA    | 0     |
| 58_extracted_k141_19361  | 1276  | No  | NA | 0  | 0 | Not-determined | Genome-fragment | NA    | 0     |
| 58_extracted_k141_166921 | 6210  | No  | NA | 0  | 2 | Not-determined | Genome-fragment | NA    | 0     |
| 58_extracted_k141_193220 | 2842  | No  | NA | 0  | 2 | Not-determined | Genome-fragment | NA    | 0     |
| 58_extracted_k141_37057  | 1116  | No  | NA | 0  | 0 | Not-determined | Genome-fragment | NA    | 0     |
| 58_extracted_k141_158132 | 1036  | No  | NA | 0  | 2 | Not-determined | Genome-fragment | NA    | 0     |
| 58_extracted_k141_97539  | 2875  | No  | NA | 0  | 0 | Not-determined | Genome-fragment | NA    | 0     |
| 58_extracted_k141_54369  | 1582  | No  | NA | 0  | 0 | Not-determined | Genome-fragment | NA    | 0     |
| 58_extracted_k141_62864  | 1115  | No  | NA | 0  | 1 | Not-determined | Genome-fragment | NA    | 0     |
| 58_extracted_k141_37069  | 1559  | No  | NA | 0  | 1 | Not-determined | Genome-fragment | NA    | 0     |
| 58_extracted_k141_149569 | 3277  | No  | NA | 0  | 1 | Not-determined | Genome-fragment | NA    | 0     |
| 55_extracted_k141_142395 | 7774  | No  | NA | 4  | 0 | Low-quality    | Genome-fragment | 9.72  | 0     |
| 57_extracted_103425      | 7774  | No  | NA | 5  | 0 | Low-quality    | Genome-fragment | 16.34 | 0     |
| 514_vs_k141_28937[Full]  | 7778  | No  | NA | 3  | 1 | Low-quality    | Genome-fragment | 9.99  | 0     |
| 58_extracted_k141_106320 | 2156  | No  | NA | 0  | 1 | Not-determined | Genome-fragment | NA    | 0     |
| 58_extracted_k141_28344  | 3299  | No  | NA | 0  | 1 | Not-determined | Genome-fragment | NA    | 0     |
| 58_extracted_k141_71134  | 2062  | No  | NA | 0  | 2 | Not-determined | Genome-fragment | NA    | 0     |
| 53_extracted_k141_121513 | 7779  | No  | NA | 2  | 0 | Low-quality    | Genome-fragment | 6.26  | 0     |
| 58_extracted_k141_28346  | 1248  | No  | NA | 0  | 2 | Not-determined | Genome-fragment | NA    | 0     |
| 58_extracted_k141_13220  |       |     |    |    |   |                |                 |       |       |



|                           |       |     |    |    |    |                |                 |       |       |
|---------------------------|-------|-----|----|----|----|----------------|-----------------|-------|-------|
| 514_vs_k141_62709[Full]   | 7805  | No  | NA | 1  | 3  | Low-quality    | Genome-fragment | 12.99 | 0     |
| 58_extracted_k141_114974  | 3102  | No  | NA | 0  | 1  | Not-determined | Genome-fragment | NA    | 0     |
| 515_extracted_23702       | 7805  | No  | NA | 3  | 1  | Low-quality    | Genome-fragment | 11.13 | 0     |
| 58_extracted_k141_2306    | 1320  | No  | NA | 0  | 1  | Not-determined | Genome-fragment | NA    | 0     |
| 57_vs_k1390[Full]         | 7808  | No  | NA | 5  | 0  | Low-quality    | Genome-fragment | 22.05 | 0     |
| 58_extracted_k141_97635   | 2208  | No  | NA | 0  | 0  | Not-determined | Genome-fragment | NA    | 0     |
| 58_extracted_k141_132275  | 1182  | No  | NA | 0  | 2  | Not-determined | Genome-fragment | NA    | 0     |
| 58_extracted_k141_89075   | 3736  | No  | NA | 0  | 0  | Not-determined | Genome-fragment | NA    | 0     |
| 510_extracted_60111       | 7809  | No  | NA | 1  | 1  | Low-quality    | Genome-fragment | 17.98 | 0     |
| 58_extracted_k141_193354  | 1009  | No  | NA | 0  | 0  | Not-determined | Genome-fragment | NA    | 0     |
| 58_extracted_k141_193356  | 1371  | No  | NA | 0  | 1  | Not-determined | Genome-fragment | NA    | 0     |
| 58_extracted_k141_197656  | 1643  | No  | NA | 0  | 0  | Not-determined | Genome-fragment | NA    | 0     |
| 58_extracted_k141_193368  | 1416  | No  | NA | 0  | 1  | Not-determined | Genome-fragment | NA    | 0     |
| 58_extracted_k141_2341    | 1418  | No  | NA | 0  | 0  | Not-determined | Genome-fragment | NA    | 0     |
| 58_extracted_k141_54488   | 4262  | No  | NA | 0  | 2  | Not-determined | Genome-fragment | NA    | 0     |
| 511_vs_k141_45308[Full]   | 7815  | No  | NA | 0  | 1  | Low-quality    | Genome-fragment | 22.56 | 0     |
| 58_extracted_k141_80413   | 1212  | No  | NA | 0  | 2  | Not-determined | Genome-fragment | NA    | 0     |
| 58_extracted_k141_115009  | 7808  | No  | NA | 0  | 4  | Not-determined | Genome-fragment | NA    | 0     |
| 58_extracted_k141_19482   | 1252  | No  | NA | 0  | 0  | Not-determined | Genome-fragment | NA    | 0     |
| 58_extracted_k141_106479  | 1414  | No  | NA | 0  | 2  | Not-determined | Genome-fragment | NA    | 0     |
| 58_extracted_k141_167076  | 4580  | No  | NA | 0  | 0  | Not-determined | Genome-fragment | NA    | 0     |
| 58_extracted_k141_97691   | 1181  | No  | NA | 0  | 0  | Not-determined | Genome-fragment | NA    | 0     |
| 58_extracted_k141_141091  | 1056  | No  | NA | 0  | 2  | Not-determined | Genome-fragment | NA    | 0     |
| 58_extracted_k141_28510   | 1048  | No  | NA | 0  | 2  | Not-determined | Genome-fragment | NA    | 0     |
| 58_extracted_k141_106486  | 1215  | No  | NA | 0  | 1  | Not-determined | Genome-fragment | NA    | 0     |
| 58_extracted_k141_37168   | 1014  | No  | NA | 0  | 0  | Not-determined | Genome-fragment | NA    | 0     |
| 514_vs_k141_55833[Full]   | 7815  | No  | NA | 2  | 0  | Low-quality    | Genome-fragment | 18.02 | 0     |
| 51_extracted_k141_48966   | 7817  | No  | NA | 0  | 0  | Low-quality    | Genome-fragment | 19.05 | 0     |
| 58_extracted_k141_201493  | 1017  | No  | NA | 0  | 0  | Not-determined | Genome-fragment | NA    | 0     |
| 58_extracted_k141_80445   | 1558  | No  | NA | 0  | 1  | Not-determined | Genome-fragment | NA    | 0     |
| 58_extracted_k141_141104  | 3086  | No  | NA | 0  | 1  | Not-determined | Genome-fragment | NA    | 0     |
| 513_extracted_89590       | 7819  | Yes | NA | 1  | 1  | Low-quality    | Genome-fragment | 7.38  | 55.38 |
| 58_extracted_k141_10701   | 1662  | No  | NA | 0  | 0  | Not-determined | Genome-fragment | NA    | 0     |
| 58_extracted_k141_171214  | 23486 | No  | NA | 9  | 0  | Medium-quality | Genome-fragment | 74.7  | 0     |
| 58_extracted_k141_89136   | 1028  | No  | NA | 0  | 1  | Not-determined | Genome-fragment | NA    | 0     |
| 58_extracted_k141_28539   | 1128  | No  | NA | 0  | 0  | Not-determined | Genome-fragment | NA    | 0     |
| 58_extracted_k141_37176   | 3649  | No  | NA | 0  | 3  | Not-determined | Genome-fragment | NA    | 0     |
| 58_extracted_k141_63041   | 1135  | No  | NA | 0  | 1  | Not-determined | Genome-fragment | NA    | 0     |
| 58_extracted_k141_28549   | 4226  | No  | NA | 0  | 0  | Not-determined | Genome-fragment | NA    | 0     |
| 58_extracted_k141_97734   | 1814  | No  | NA | 0  | 1  | Not-determined | Genome-fragment | NA    | 0     |
| 58_extracted_k141_63052   | 1081  | No  | NA | 0  | 0  | Not-determined | Genome-fragment | NA    | 0     |
| 58_extracted_k141_80457   | 4063  | No  | NA | 0  | 2  | Not-determined | Genome-fragment | NA    | 0     |
| 58_extracted_k141_80461   | 1765  | No  | NA | 0  | 2  | Not-determined | Genome-fragment | NA    | 0     |
| 58_extracted_k141_193420  | 2012  | No  | NA | 0  | 1  | Not-determined | Genome-fragment | NA    | 0     |
| 58_extracted_k141_175692  | 1247  | No  | NA | 0  | 0  | Not-determined | Genome-fragment | NA    | 0     |
| 58_extracted_k141_10742   | 1152  | No  | NA | 0  | 1  | Not-determined | Genome-fragment | NA    | 0     |
| 517_extracted_k141_62525  | 7830  | No  | NA | 4  | 0  | Low-quality    | Genome-fragment | 13.59 | 0     |
| 512_vs_k141_81574[Full]   | 7831  | No  | NA | 1  | 0  | Low-quality    | Genome-fragment | 13.9  | 0     |
| 58_vs_k141_162341[Full]   | 7834  | No  | NA | 1  | 0  | Low-quality    | Genome-fragment | 19.83 | 0     |
| 59_vs_k141_65960[Full]    | 7837  | No  | NA | 1  | 0  | Low-quality    | Genome-fragment | 18.78 | 0     |
| 58_extracted_k141_158225  | 90855 | No  | NA | 7  | 0  | Complete       | High-quality    | 100   | 0     |
| 58_extracted_k141_182962  | 1168  | No  | NA | 0  | 1  | Not-determined | Genome-fragment | NA    | 0     |
| 58_extracted_k141_10767   | 1650  | No  | NA | 0  | 1  | Not-determined | Genome-fragment | NA    | 0     |
| 55_vs_k141_40009[Full]    | 7840  | No  | NA | 0  | 0  | Low-quality    | Genome-fragment | 17.86 | 0     |
| 58_extracted_k141_167140  | 1016  | No  | NA | 0  | 1  | Not-determined | Genome-fragment | NA    | 0     |
| 58_extracted_k141_182966  | 1550  | No  | NA | 0  | 0  | Not-determined | Genome-fragment | NA    | 0     |
| 58_extracted_k141_175707  | 1257  | No  | NA | 0  | 0  | Not-determined | Genome-fragment | NA    | 0     |
| 58_extracted_k141_123901  | 1401  | No  | NA | 0  | 1  | Not-determined | Genome-fragment | NA    | 0     |
| 58_extracted_k141_106563  | 1172  | No  | NA | 0  | 1  | Not-determined | Genome-fragment | NA    | 0     |
| 58_extracted_k141_123904  | 1060  | No  | NA | 0  | 0  | Not-determined | Genome-fragment | NA    | 0     |
| 58_extracted_k141_28575   | 1396  | No  | NA | 0  | 2  | Not-determined | Genome-fragment | NA    | 0     |
| 58_extracted_k141_54514   | 53614 | No  | NA | 16 | 0  | Complete       | High-quality    | 100   | 0     |
| 58_extracted_k141_28584   | 1673  | No  | NA | 0  | 0  | Not-determined | Genome-fragment | NA    | 0     |
| 58_extracted_k141_19605   | 1254  | No  | NA | 0  | 1  | Not-determined | Genome-fragment | NA    | 0     |
| 58_extracted_k141_45450   | 6845  | No  | NA | 0  | 0  | Not-determined | Genome-fragment | NA    | 0     |
| 58_extracted_k141_106566  | 5254  | No  | NA | 0  | 3  | Not-determined | Genome-fragment | NA    | 0     |
| 58_extracted_k141_106567  | 1403  | No  | NA | 0  | 1  | Not-determined | Genome-fragment | NA    | 0     |
| 58_extracted_k141_201557  | 1541  | No  | NA | 0  | 1  | Not-determined | Genome-fragment | NA    | 0     |
| 58_extracted_k141_63115   | 1531  | No  | NA | 0  | 2  | Not-determined | Genome-fragment | NA    | 0     |
| 58_extracted_k141_149716  | 5812  | No  | NA | 0  | 5  | Not-determined | Genome-fragment | NA    | 0     |
| 58_extracted_k141_45475   | 1011  | No  | NA | 0  | 0  | Not-determined | Genome-fragment | NA    | 0     |
| 58_extracted_k141_18400   | 1140  | No  | NA | 0  | 0  | Not-determined | Genome-fragment | NA    | 0     |
| 58_extracted_k141_115089  | 1950  | No  | NA | 0  | 0  | Not-determined | Genome-fragment | NA    | 0     |
| 58_extracted_k141_123947  | 1227  | No  | NA | 0  | 1  | Not-determined | Genome-fragment | NA    | 0     |
| 51_vs_k141_50979[Full]    | 7850  | No  | NA | 2  | 1  | Low-quality    | Genome-fragment | 23.75 | 0     |
| 58_extracted_k141_80515   | 4248  | No  | NA | 0  | 3  | Not-determined | Genome-fragment | NA    | 0     |
| 58_extracted_k141_63167   | 1804  | No  | NA | 0  | 2  | Not-determined | Genome-fragment | NA    | 0     |
| 58_extracted_k141_123960  | 1475  | No  | NA | 0  | 1  | Not-determined | Genome-fragment | NA    | 0     |
| 58_extracted_k141_28652   | 1102  | No  | NA | 0  | 1  | Not-determined | Genome-fragment | NA    | 0     |
| 58_extracted_k141_45483   | 25130 | No  | NA | 0  | 18 | Not-determined | Genome-fragment | NA    | 0     |
| 58_extracted_k141_2454    | 1073  | No  | NA | 0  | 1  | Not-determined | Genome-fragment | NA    | 0     |
| 514_extracted_k141_42465  | 7852  | No  | NA | 0  | 1  | Low-quality    | Genome-fragment | 6.01  | 0     |
| 58_extracted_k141_167189  | 1148  | No  | NA | 0  | 1  | Not-determined | Genome-fragment | NA    | 0     |
| 58_extracted_k141_2456    | 1118  | No  | NA | 0  | 1  | Not-determined | Genome-fragment | NA    | 0     |
| 58_extracted_k141_123978  | 1725  | No  | NA | 0  | 1  | Not-determined | Genome-fragment | NA    | 0     |
| 58_extracted_k141_63183   | 2564  | No  | NA | 0  | 2  | Not-determined | Genome-fragment | NA    | 0     |
| 58_extracted_k141_19678   | 1926  | No  | NA | 0  | 1  | Not-determined | Genome-fragment | NA    | 0     |
| 58_extracted_k141_167197  | 1139  | No  | NA | 0  | 1  | Not-determined | Genome-fragment | NA    | 0     |
| 58_extracted_k141_10803   | 55442 | No  | NA | 0  | 7  | Not-determined | Genome-fragment | NA    | 0     |
| 58_extracted_k141_37337   | 3848  | No  | NA | 0  | 5  | Not-determined | Genome-fragment | NA    | 0     |
| 58_extracted_k141_80559   | 1302  | No  | NA | 0  | 1  | Not-determined | Genome-fragment | NA    | 0     |
| 58_extracted_k141_153551  | 1424  | No  | NA | 0  | 0  | Not-determined | Genome-fragment | NA    | 0     |
| 58_extracted_k141_28704   | 1087  | No  | NA | 0  | 1  | Not-determined | Genome-fragment | NA    | 0     |
| 58_extracted_k141_175797  | 1196  | No  | NA | 0  | 0  | Not-determined | Genome-fragment | NA    | 0     |
| 58_extracted_k141_18028   | 1109  | No  | NA | 0  | 0  | Not-determined | Genome-fragment | NA    | 0     |
| 59_vs_k141_30168[Full]    | 7853  | No  | NA | 1  | 0  | Low-quality    | Genome-fragment | 19.19 | 0     |
| 58_extracted_k141_141248  | 1096  | No  | NA | 0  | 0  | Not-determined | Genome-fragment | NA    | 0     |
| 512_extracted_k141_128572 | 7858  | No  | NA | 1  | 0  | Low-quality    | Genome-fragment | 19.38 | 0     |
| 58_extracted_k141_124012  | 3713  | No  | NA | 0  | 2  | Not-determined | Genome-fragment | NA    | 0     |
| 58_extracted_k141_115110  | 1005  | No  | NA | 0  | 1  | Not-determined | Genome-fragment | NA    | 0     |
| 55_extracted_k141_115529  | 7859  | No  | NA | 9  | 0  | Low-quality    | Genome-fragment | 35.85 | 0     |
| 58_extracted_k141_193520  | 3492  | No  | NA | 0  | 0  | Not-determined | Genome-fragment | NA    | 0     |
| 58_extracted_k141_19709   | 1146  | No  | NA | 0  | 1  | Not-determined | Genome-fragment | NA    | 0     |
| 58_extracted_k141_149792  | 1640  | No  | NA | 0  | 1  | Not-determined | Genome-fragment | NA    | 0     |
| 58_extracted_k141_141260  | 1975  | No  | NA | 0  | 1  | Not-determined | Genome-fragment | NA    | 0     |
| 58_extracted_k141_141274  | 1571  | No  | NA | 0  | 1  | Not-determined | Genome-fragment | NA    | 0     |
| 58_extracted_k141_80603   | 1912  | No  | NA | 0  | 1  | Not-determined | Genome-fragment | NA    | 0     |
| 58_extracted_k141_19720   | 3496  | No  | NA | 0  | 3  | Not-determined | Genome-fragment | NA    | 0     |
| 58_extracted_k141_10872   | 1368  | No  | NA | 0  | 1  | Not-determined | Genome-fragment | NA    | 0     |
| 57_vs_k141_62640[Full]    | 7860  | Yes | NA | 2  | 1  | Low-quality    | Genome-fragment | 6.68  | 38.82 |
| 58_extracted_k141_71383   | 8695  | No  | NA | 0  | 2  | Not-determined | Genome-fragment | NA    | 0     |
| 58_extracted_k141_175853  | 1616  | No  | NA | 0  | 0  | Not-determined | Genome-fragment | NA    | 0     |
| 58_extracted_k141_115133  | 6346  | No  | NA | 0  | 2  | Not-determined | Genome-fragment | NA    | 0     |
| 517_extracted_k141_59642  | 7861  | No  | NA | 4  | 0  | Low-quality    | Genome-fragment | 16.66 | 0     |
| 58_extracted_k141_54607   | 2993  | No  | NA | 1  | 0  | Not-determined | Genome-fragment | NA    | 0     |
| 52_extracted_k141_1808    | 7872  | No  | NA | 1  | 0  | Low-quality    | Genome-fragment | 13.66 | 0     |
| 58_extracted_k141_54609   | 4469  | No  | NA | 0  | 2  | Not-determined | Genome-fragment | NA    | 0     |
| 58_extracted_k141_89180   | 1004  | No  | NA | 0  | 0  | Not-determined | Genome-fragment | NA    | 0     |
| 58_extracted_k141_54614   | 1103  | No  | NA | 0  | 0  | Not-determined | Genome-fragment | NA    | 0     |
| 58_extracted_k141_10899   | 4312  | No  | NA | 0  | 0  | Not-determined | Genome-fragment | NA    | 0     |
| 58_extracted_k141_2510    | 1324  | No  | NA | 0  | 1  | Not-determined | Genome-fragment | NA    | 0     |
| 58_extracted_k141_167257  | 2884  | No  | NA | 0  | 0  | Not-determined | Genome-fragment | NA    | 0     |
| 58_extracted_k141_201695  | 45510 | No  | NA | 15 | 1  | Medium-quality | Genome-fragment | 83.41 | 0     |
| 58_extracted_k141_71376   | 4274  | No  | NA | 0  | 4  | Not-determined | Genome-fragment | NA    | 0     |
| 58_extracted_k141_80655   | 1002  | No  | NA | 0  | 1  | Not-determined | Genome-fragment | NA    | 0     |
| 58_extracted_k141_10908   | 1600  | No  | NA | 0  | 0  | Not-determined | Genome-fragment | NA    | 0     |
| 58_extracted_k141_149849  | 1122  | No  | NA | 0  | 1  | Not-determined | Genome-fragment | NA    | 0     |
| 58_extracted_k141_134087  | 1079  | No  | NA | 0  | 0  | Not-determined | Genome-fragment | NA    | 0     |
| 58_extracted_k141_141310  | 11133 | No  | NA | 0  | 6  | Not-determined | Genome-fragment | NA    | 0     |
| 58_extracted_k141_10914   | 1420  | No  | NA | 0  | 0  | Not-determined | Genome-fragment | NA    | 0     |
| 58_extracted_k141_89187   | 7868  | No  | NA | 0  | 2  | Not-determined | Genome-fragment | NA    | 0     |
| 58_extracted_k141_19753   | 6489  | No  | NA | 0  | 2  | Not-determined | Genome-fragment | NA    | 0     |
| 58_extracted_k141_115163  | 3195  | No  | NA | 0  | 5  | Not-determined | Genome-fragment | NA    | 0     |
| 516_vs_137317[Full]       | 7873  | No  | NA | 0  | 0  | Low-quality    | Genome-fragment | 17.05 | 0     |
| 58_extracted_k141_63279   | 1665  | No  | NA | 0  | 1  | Not-determined | Genome-fragment | NA    | 0     |
| 58_extracted_k141_193612  | 2975  | No  | NA | 0  | 1  | Not-determined | Genome-fragment | NA    | 0     |
| 58_extracted_k141_80674   | 6209  | No  | NA | 0  | 1  | Not-determined | Genome-fragment | NA    | 0     |
| 58_extracted_k141_71394   | 1115  | No  | NA | 0  | 0  | Not-determined | Genome-fragment | NA    | 0     |
| 58_extracted_k141_141335  | 6991  | No  | NA | 0  | 1  | Not-determined | Genome-fragment | NA    | 0     |
| 58_extracted_k141_193614  | 8299  | No  | NA | 0  | 2  | Not-determined | Genome-fragment | NA    | 0     |
| 58_extracted_k141_19393   | 1404  | No  | NA | 0  | 1  | Not-determined | Genome-fragment | NA    | 0     |
| 58_extracted_k141_158268  | 10915 | No  | NA | 0  | 2  | Not-determined | Genome-fragment | NA    | 0     |
| 58_extracted_k141_80686   | 3278  | No  | NA | 0  | 3  | Not-determined | Genome-fragment | NA    | 0     |
| 58_vs_k141_129400[Full]   | 7873  | No  | NA | 1  | 0  | Low-quality</  |                 |       |       |



|                          |       |     |       |    |   |                |                 |    |       |
|--------------------------|-------|-----|-------|----|---|----------------|-----------------|----|-------|
| 58_extracted_k141_193677 | 1767  | No  | NA    | 0  | 2 | Not-determined | Genome-fragment | NA | 0     |
| 58_extracted_k141_197848 | 1965  | No  | NA    | 0  | 0 | Not-determined | Genome-fragment | NA | 0     |
| 58_extracted_k141_45660  | 1610  | No  | NA    | 0  | 0 | Not-determined | Genome-fragment | NA | 0     |
| 58_extracted_k141_106688 | 3300  | No  | NA    | 0  | 0 | Not-determined | Genome-fragment | NA | 0     |
| 516_vs_k43611[full]      | 7883  | No  | NA    | 0  | 2 | Low-quality    | Genome-fragment | NA | 7.79  |
| 58_extracted_k141_141440 | 2107  | No  | NA    | 0  | 1 | Not-determined | Genome-fragment | NA | 0     |
| 58_extracted_k141_28896  | 1797  | No  | NA    | 0  | 0 | Not-determined | Genome-fragment | NA | 0     |
| 58_extracted_k141_71491  | 1353  | No  | NA    | 0  | 2 | Not-determined | Genome-fragment | NA | 0     |
| 58_extracted_k141_19872  | 1622  | No  | NA    | 0  | 0 | Not-determined | Genome-fragment | NA | 0     |
| 58_extracted_k141_71503  | 1007  | No  | NA    | 0  | 0 | Not-determined | Genome-fragment | NA | 0     |
| 58_extracted_k141_141474 | 1504  | No  | NA    | 0  | 0 | Not-determined | Genome-fragment | NA | 0     |
| 58_extracted_k141_45693  | 3287  | No  | NA    | 0  | 2 | Not-determined | Genome-fragment | NA | 0     |
| 55_extracted_k141_114825 | 7895  | No  | NA    | 4  | 0 | Low-quality    | Genome-fragment | NA | 21.45 |
| 58_extracted_k141_158346 | 2800  | No  | NA    | 0  | 1 | Not-determined | Genome-fragment | NA | 0     |
| 58_extracted_k141_115261 | 4617  | No  | NA    | 0  | 3 | Not-determined | Genome-fragment | NA | 0     |
| 58_extracted_k141_141486 | 1588  | No  | NA    | 0  | 2 | Not-determined | Genome-fragment | NA | 0     |
| 58_extracted_k141_45701  | 1077  | No  | NA    | 0  | 1 | Not-determined | Genome-fragment | NA | 0     |
| 58_extracted_k141_89298  | 2300  | No  | NA    | 0  | 0 | Not-determined | Genome-fragment | NA | 0     |
| 58_extracted_k141_54695  | 1412  | No  | NA    | 0  | 0 | Not-determined | Genome-fragment | NA | 0     |
| 58_extracted_k141_106723 | 1047  | No  | NA    | 0  | 0 | Not-determined | Genome-fragment | NA | 0     |
| 58_extracted_k141_193732 | 1733  | No  | NA    | 0  | 1 | Not-determined | Genome-fragment | NA | 0     |
| 58_extracted_k141_89304  | 3013  | No  | NA    | 0  | 1 | Not-determined | Genome-fragment | NA | 0     |
| 58_extracted_k141_37412  | 3176  | No  | NA    | 0  | 2 | Not-determined | Genome-fragment | NA | 0     |
| 58_extracted_k141_132617 | 2842  | No  | NA    | 0  | 2 | Not-determined | Genome-fragment | NA | 0     |
| 517_vs_k141_593771[full] | 7899  | No  | NA    | 1  | 3 | Low-quality    | Genome-fragment | NA | 7.18  |
| 58_extracted_k141_115282 | 1056  | No  | NA    | 0  | 2 | Not-determined | Genome-fragment | NA | 0     |
| 58_extracted_k141_2662   | 1523  | No  | NA    | 0  | 1 | Not-determined | Genome-fragment | NA | 0     |
| 58_extracted_k141_132624 | 2951  | No  | NA    | 0  | 1 | Not-determined | Genome-fragment | NA | 0     |
| 514_vs_k141_234271[full] | 7900  | No  | NA    | 0  | 1 | Low-quality    | Genome-fragment | NA | 16.8  |
| 58_extracted_k141_141512 | 3687  | No  | NA    | 0  | 2 | Not-determined | Genome-fragment | NA | 0     |
| 58_extracted_k141_63444  | 1515  | No  | NA    | 0  | 0 | Not-determined | Genome-fragment | NA | 0     |
| 58_extracted_k141_20376  | 1147  | No  | NA    | 0  | 1 | Not-determined | Genome-fragment | NA | 0     |
| 511_extracted_k141_14923 | 7905  | No  | NA    | 4  | 0 | Low-quality    | Genome-fragment | NA | 12.21 |
| 58_extracted_k141_176121 | 2206  | No  | NA    | 0  | 2 | Not-determined | Genome-fragment | NA | 0     |
| 58_extracted_k141_71554  | 1898  | No  | NA    | 0  | 2 | Not-determined | Genome-fragment | NA | 0     |
| 58_extracted_k141_2677   | 1256  | No  | NA    | 0  | 1 | Not-determined | Genome-fragment | NA | 0     |
| 514_vs_k141_958271[full] | 7905  | No  | NA    | 0  | 5 | Low-quality    | Genome-fragment | NA | 3.44  |
| 58_extracted_k141_97925  | 1284  | No  | NA    | 0  | 0 | Not-determined | Genome-fragment | NA | 0     |
| 58_extracted_k141_89351  | 4456  | No  | NA    | 0  | 2 | Not-determined | Genome-fragment | NA | 0     |
| 58_extracted_k141_71562  | 1560  | No  | NA    | 0  | 0 | Not-determined | Genome-fragment | NA | 0     |
| 58_extracted_k141_28937  | 1924  | No  | NA    | 0  | 3 | Not-determined | Genome-fragment | NA | 0     |
| 58_extracted_k141_63486  | 1159  | No  | NA    | 0  | 0 | Not-determined | Genome-fragment | NA | 0     |
| 58_extracted_k141_89358  | 3626  | No  | NA    | 0  | 3 | Not-determined | Genome-fragment | NA | 0     |
| 58_extracted_k141_63496  | 1518  | No  | NA    | 0  | 3 | Not-determined | Genome-fragment | NA | 0     |
| 58_extracted_k141_176151 | 1015  | No  | NA    | 0  | 1 | Not-determined | Genome-fragment | NA | 0     |
| 58_extracted_k141_71564  | 11380 | No  | NA    | 0  | 0 | Not-determined | Genome-fragment | NA | 0     |
| 58_extracted_k141_37469  | 1476  | No  | NA    | 0  | 1 | Not-determined | Genome-fragment | NA | 0     |
| 58_extracted_k141_193807 | 1368  | No  | NA    | 0  | 0 | Not-determined | Genome-fragment | NA | 0     |
| 58_extracted_k141_132685 | 1090  | No  | NA    | 0  | 0 | Not-determined | Genome-fragment | NA | 0     |
| 58_extracted_k141_37476  | 3017  | No  | NA    | 0  | 2 | Not-determined | Genome-fragment | NA | 0     |
| 58_extracted_k141_132686 | 1178  | No  | NA    | 0  | 0 | Not-determined | Genome-fragment | NA | 0     |
| 58_extracted_k141_63504  | 1086  | No  | NA    | 0  | 1 | Not-determined | Genome-fragment | NA | 0     |
| 58_extracted_k141_124318 | 3628  | No  | NA    | 0  | 5 | Not-determined | Genome-fragment | NA | 0     |
| 58_extracted_k141_45776  | 36660 | No  | NA    | 70 | 0 | High-quality   | High-quality    | NA | 100   |
| 58_extracted_k141_54785  | 1026  | No  | NA    | 0  | 0 | Not-determined | Genome-fragment | NA | 0     |
| 58_extracted_k141_124321 | 2817  | No  | NA    | 0  | 0 | Not-determined | Genome-fragment | NA | 0     |
| 58_extracted_k141_89397  | 1055  | No  | NA    | 0  | 1 | Not-determined | Genome-fragment | NA | 0     |
| 58_extracted_k141_54789  | 1865  | No  | NA    | 0  | 1 | Not-determined | Genome-fragment | NA | 0     |
| 58_extracted_k141_124336 | 3376  | No  | NA    | 0  | 1 | Not-determined | Genome-fragment | NA | 0     |
| 58_extracted_k141_63528  | 1781  | No  | NA    | 0  | 1 | Not-determined | Genome-fragment | NA | 0     |
| 58_extracted_k141_80858  | 1679  | No  | NA    | 0  | 1 | Not-determined | Genome-fragment | NA | 0     |
| 58_extracted_k141_28956  | 43413 | Yes | 25419 | 12 | 9 | Medium-quality | Genome-fragment | NA | 88.11 |
| 58_extracted_k141_63546  | 2015  | No  | NA    | 0  | 1 | Not-determined | Genome-fragment | NA | 41.45 |
| 58_extracted_k141_106831 | 4691  | No  | NA    | 0  | 3 | Not-determined | Genome-fragment | NA | 0     |
| 51_vs_k141_206741[full]  | 7908  | No  | NA    | 0  | 1 | Low-quality    | Genome-fragment | NA | 18.44 |
| 515_vs_199391[full]      | 7910  | No  | NA    | 3  | 0 | Low-quality    | Genome-fragment | NA | 18.52 |
| 58_extracted_k141_193840 | 2423  | No  | NA    | 0  | 0 | Not-determined | Genome-fragment | NA | 0     |
| 58_extracted_k141_124362 | 1022  | No  | NA    | 0  | 1 | Not-determined | Genome-fragment | NA | 0     |
| 58_extracted_k141_98016  | 1232  | No  | NA    | 0  | 0 | Not-determined | Genome-fragment | NA | 0     |
| 58_extracted_k141_167526 | 4459  | No  | NA    | 0  | 3 | Not-determined | Genome-fragment | NA | 0     |
| 58_extracted_k141_28989  | 1023  | No  | NA    | 0  | 1 | Not-determined | Genome-fragment | NA | 0     |
| 58_extracted_k141_11137  | 1017  | No  | NA    | 0  | 0 | Not-determined | Genome-fragment | NA | 0     |
| 58_extracted_k141_80902  | 2256  | No  | NA    | 0  | 0 | Not-determined | Genome-fragment | NA | 0     |
| 53_extracted_k141_1131   | 7911  | No  | NA    | 0  | 1 | Low-quality    | Genome-fragment | NA | 18.06 |
| 58_extracted_k141_28036  | 1893  | No  | NA    | 0  | 0 | Not-determined | Genome-fragment | NA | 0     |
| 58_extracted_k141_201904 | 2342  | No  | NA    | 0  | 3 | Not-determined | Genome-fragment | NA | 0     |
| 58_extracted_k141_132697 | 59637 | No  | NA    | 19 | 0 | Complete       | High-quality    | NA | 100   |
| 51_vs_k141_766151[full]  | 7918  | No  | NA    | 4  | 0 | Low-quality    | Genome-fragment | NA | 19.37 |
| 58_extracted_k141_71591  | 4669  | No  | NA    | 0  | 0 | Not-determined | Genome-fragment | NA | 0     |
| 510_extracted_k14867     | 7924  | No  | NA    | 0  | 6 | Low-quality    | Genome-fragment | NA | 4.51  |
| 58_extracted_k141_201911 | 3094  | No  | NA    | 0  | 1 | Not-determined | Genome-fragment | NA | 0     |
| 58_extracted_k141_80924  | 1459  | No  | NA    | 0  | 0 | Not-determined | Genome-fragment | NA | 0     |
| 58_extracted_k141_89497  | 1022  | No  | NA    | 0  | 1 | Not-determined | Genome-fragment | NA | 0     |
| 58_extracted_k141_115407 | 1571  | No  | NA    | 0  | 0 | Not-determined | Genome-fragment | NA | 0     |
| 58_extracted_k141_54829  | 3344  | No  | NA    | 0  | 0 | Not-determined | Genome-fragment | NA | 0     |
| 58_extracted_k141_115412 | 1349  | No  | NA    | 0  | 0 | Not-determined | Genome-fragment | NA | 0     |
| 512_vs_k141_100211[full] | 7926  | No  | NA    | 2  | 0 | Low-quality    | Genome-fragment | NA | 20.09 |
| 58_extracted_k141_158520 | 3278  | No  | NA    | 0  | 2 | Not-determined | Genome-fragment | NA | 0     |
| 58_extracted_k141_11162  | 1242  | No  | 2031  | 1  | 0 | Not-determined | Genome-fragment | NA | 4.16  |
| 514_vs_k141_64331[full]  | 7930  | Yes | NA    | 1  | 2 | Low-quality    | Genome-fragment | NA | 74.39 |
| 58_extracted_k141_193844 | 1822  | No  | NA    | 0  | 1 | Not-determined | Genome-fragment | NA | 0     |
| 58_extracted_k141_20076  | 7152  | No  | NA    | 0  | 6 | Not-determined | Genome-fragment | NA | 0     |
| 514_vs_k141_735931[full] | 7931  | Yes | 5893  | 1  | 1 | Low-quality    | Genome-fragment | NA | 3.96  |
| 58_extracted_k141_89520  | 1546  | No  | NA    | 0  | 0 | Not-determined | Genome-fragment | NA | 0     |
| 58_extracted_k141_158533 | 3517  | No  | NA    | 0  | 0 | Not-determined | Genome-fragment | NA | 0     |
| 58_extracted_k141_115439 | 1577  | No  | NA    | 0  | 0 | Not-determined | Genome-fragment | NA | 0     |
| 58_extracted_k141_54862  | 1793  | No  | NA    | 0  | 0 | Not-determined | Genome-fragment | NA | 0     |
| 58_extracted_k141_80618  | 7933  | No  | NA    | 0  | 4 | Low-quality    | Genome-fragment | NA | 14.46 |
| 59_extracted_k141_31185  | 7940  | No  | NA    | 0  | 0 | Low-quality    | Genome-fragment | NA | 18.01 |
| 58_extracted_k141_89528  | 4839  | No  | NA    | 0  | 1 | Not-determined | Genome-fragment | NA | 0     |
| 58_extracted_k141_106925 | 2273  | No  | NA    | 0  | 1 | Not-determined | Genome-fragment | NA | 0     |
| 58_extracted_k141_98080  | 2849  | No  | NA    | 0  | 0 | Not-determined | Genome-fragment | NA | 0     |
| 58_extracted_k141_158552 | 1277  | No  | NA    | 0  | 0 | Not-determined | Genome-fragment | NA | 0     |
| 512_extracted_k141_52192 | 7940  | No  | NA    | 2  | 0 | Low-quality    | Genome-fragment | NA | 12.47 |
| 57_vs_k21551[full]       | 7941  | No  | NA    | 0  | 0 | Low-quality    | Genome-fragment | NA | 22.89 |
| 514_vs_k141_127331[full] | 7944  | No  | NA    | 8  | 0 | Low-quality    | Genome-fragment | NA | 15.42 |
| 58_extracted_k141_132749 | 1030  | No  | NA    | 0  | 1 | Not-determined | Genome-fragment | NA | 0     |
| 58_extracted_k141_201950 | 3924  | No  | NA    | 0  | 2 | Not-determined | Genome-fragment | NA | 0     |
| 58_extracted_k141_115473 | 2558  | No  | NA    | 0  | 2 | Not-determined | Genome-fragment | NA | 0     |
| 58_extracted_k141_54880  | 1655  | No  | NA    | 0  | 1 | Not-determined | Genome-fragment | NA | 0     |
| 58_extracted_k141_63642  | 6281  | No  | NA    | 0  | 3 | Not-determined | Genome-fragment | NA | 0     |
| 58_extracted_k141_141619 | 1206  | No  | NA    | 0  | 0 | Not-determined | Genome-fragment | NA | 0     |
| 58_extracted_k141_124422 | 1201  | No  | NA    | 0  | 0 | Not-determined | Genome-fragment | NA | 0     |
| 58_extracted_k141_45892  | 1528  | No  | NA    | 0  | 0 | Not-determined | Genome-fragment | NA | 0     |
| 511_vs_k141_502321[full] | 7951  | No  | NA    | 0  | 0 | Low-quality    | Genome-fragment | NA | 19.48 |
| 58_extracted_k141_158587 | 2237  | No  | NA    | 0  | 1 | Not-determined | Genome-fragment | NA | 0     |
| 58_extracted_k141_54898  | 2288  | No  | NA    | 0  | 1 | Not-determined | Genome-fragment | NA | 0     |
| 58_extracted_k141_45899  | 2926  | No  | NA    | 0  | 1 | Not-determined | Genome-fragment | NA | 0     |
| 51_vs_k141_782631[full]  | 7955  | No  | NA    | 0  | 0 | Low-quality    | Genome-fragment | NA | 3.43  |
| 58_extracted_k141_63659  | 1412  | No  | NA    | 0  | 2 | Not-determined | Genome-fragment | NA | 0     |
| 58_extracted_k141_141631 | 1112  | No  | NA    | 0  | 2 | Not-determined | Genome-fragment | NA | 0     |
| 58_extracted_k141_63663  | 1753  | No  | NA    | 0  | 2 | Not-determined | Genome-fragment | NA | 0     |
| 58_extracted_k141_124428 | 5247  | No  | NA    | 0  | 3 | Not-determined | Genome-fragment | NA | 0     |
| 512_extracted_k141_97440 | 7955  | No  | NA    | 1  | 0 | Low-quality    | Genome-fragment | NA | 6.88  |
| 517_extracted_k141_89360 | 7956  | No  | NA    | 17 | 0 | Low-quality    | Genome-fragment | NA | 26.24 |
| 58_extracted_k141_24076  | 7960  | No  | NA    | 2  | 0 | Low-quality    | Genome-fragment | NA | 16.4  |
| 512_vs_k141_39391[full]  | 7960  | No  | NA    | 6  | 0 | Low-quality    | Genome-fragment | NA | 22.2  |
| 52_vs_k141_141871[full]  | 7965  | No  | NA    | 0  | 0 | Low-quality    | Genome-fragment | NA | 20.23 |
| 58_extracted_k141_63677  | 1989  | No  | NA    | 0  | 0 | Not-determined | Genome-fragment | NA | 0     |
| 58_extracted_k141_98156  | 1089  | No  | NA    | 0  | 1 | Not-determined | Genome-fragment | NA | 0     |
| 58_extracted_k141_45927  | 1704  | No  | NA    | 0  | 4 | Not-determined | Genome-fragment | NA | 0     |
| 58_extracted_k141_45932  | 1034  | No  | NA    | 0  | 1 | Not-determined | Genome-fragment | NA | 0     |
| 58_extracted_k141_167654 | 1830  | No  | NA    | 0  | 0 | Not-determined | Genome-fragment | NA | 0     |
| 58_extracted_k141_63685  | 1138  | No  | NA    | 0  | 1 | Not-determined | Genome-fragment | NA | 0     |
| 58_extracted_k141_106946 | 42628 | No  | NA    | 27 | 0 | Complete       | High-quality    | NA | 100   |
| 58_extracted_k141_54917  | 5526  | No  | NA    | 0  | 0 | Not-determined | Genome-fragment | NA | 0     |
| 58_extracted_k141_98175  | 2811  | No  | NA    | 0  | 0 | Not-determined | Genome-fragment | NA | 0     |
| 58_extracted_k141_89560  | 2450  | No  | NA    | 0  | 2 | Not-determined | Genome-fragment | NA | 0     |
| 58_extracted_k141_132787 | 5274  | No  | NA    | 0  | 4 | Not-determined | Genome-fragment | NA | 0     |
| 58_extracted_k141_193896 | 1159  | No  | NA    | 0  | 1 | Not-determined | Genome-fragment | NA | 0     |
| 58_extracted_k141_202016 | 5358  | No  | NA    | 0  | 0 | Not-determined | Genome-fragment | NA | 0     |
| 58_extracted_k141_54941  | 4011  | No  | NA    | 0  | 1 | Not-determined | Genome-fragment | NA | 0     |
| 51_extracted_k141_67670  | 7982  | No  | NA    | 6  | 0 | Low-quality    | Genome-fragment | NA | 14.43 |
| 58_extracted_k141_115570 | 1     |     |       |    |   |                |                 |    |       |



|                          |       |     |    |    |   |                |                 |       |       |
|--------------------------|-------|-----|----|----|---|----------------|-----------------|-------|-------|
| 58_extracted_k141_107047 | 1274  | No  | NA | 0  | 1 | Not-determined | Genome-fragment | NA    | 0     |
| 58_extracted_k141_2856   | 3600  | No  | NA | 0  | 0 | Not-determined | Genome-fragment | NA    | 0     |
| 58_extracted_k141_20219  | 1606  | No  | NA | 0  | 0 | Not-determined | Genome-fragment | NA    | 0     |
| 58_extracted_k141_55003  | 1697  | No  | NA | 0  | 4 | Not-determined | Genome-fragment | NA    | 0     |
| 58_extracted_k141_202075 | 1206  | No  | NA | 0  | 0 | Not-determined | Genome-fragment | NA    | 0     |
| 58_extracted_k141_11291  | 1539  | No  | NA | 0  | 1 | Not-determined | Genome-fragment | NA    | 0     |
| 58_extracted_k141_55013  | 2055  | No  | NA | 0  | 2 | Not-determined | Genome-fragment | NA    | 0     |
| 58_extracted_k141_46020  | 13470 | No  | NA | 0  | 0 | Not-determined | Genome-fragment | NA    | 0     |
| 58_extracted_k141_61758  | 1542  | No  | NA | 0  | 2 | Not-determined | Genome-fragment | NA    | 0     |
| 58_extracted_k141_55021  | 1021  | No  | NA | 0  | 3 | Not-determined | Genome-fragment | NA    | 0     |
| 58_extracted_k141_124539 | 1980  | No  | NA | 0  | 1 | Not-determined | Genome-fragment | NA    | 0     |
| 58_extracted_k141_81131  | 2183  | No  | NA | 0  | 0 | Not-determined | Genome-fragment | NA    | 0     |
| 58_extracted_k141_89635  | 1228  | No  | NA | 0  | 2 | Not-determined | Genome-fragment | NA    | 0     |
| 58_extracted_k141_46044  | 3324  | No  | NA | 0  | 1 | Not-determined | Genome-fragment | NA    | 0     |
| 58_extracted_k141_63771  | 2529  | No  | NA | 0  | 2 | Not-determined | Genome-fragment | NA    | 0     |
| 58_extracted_k141_11215  | 3956  | No  | NA | 0  | 0 | Not-determined | Genome-fragment | NA    | 0     |
| 58_extracted_k141_20275  | 1033  | No  | NA | 0  | 0 | Not-determined | Genome-fragment | NA    | 0     |
| 58_extracted_k141_98597  | 8005  | No  | NA | 3  | 0 | Low-quality    | Genome-fragment | 18.32 | 0     |
| 512_vs_k141_121233[full] | 8010  | No  | NA | 3  | 0 | Low-quality    | Genome-fragment | 22.44 | 0     |
| 58_extracted_k141_107081 | 4240  | No  | NA | 0  | 2 | Not-determined | Genome-fragment | NA    | 0     |
| 58_extracted_k141_141736 | 1760  | No  | NA | 0  | 0 | Not-determined | Genome-fragment | NA    | 0     |
| 58_extracted_k141_98518  | 1484  | No  | NA | 0  | 1 | Not-determined | Genome-fragment | NA    | 0     |
| 58_extracted_k141_20287  | 3287  | No  | NA | 0  | 3 | Not-determined | Genome-fragment | NA    | 0     |
| 58_vs_k141_125011[full]  | 8015  | No  | NA | 7  | 0 | Low-quality    | Genome-fragment | 12.8  | 0     |
| 58_extracted_k141_46070  | 3368  | No  | NA | 0  | 2 | Not-determined | Genome-fragment | NA    | 0     |
| 511_extracted_k141_30750 | 8018  | No  | NA | 2  | 0 | Low-quality    | Genome-fragment | 6.62  | 0     |
| 58_extracted_k141_46073  | 1903  | No  | NA | 0  | 0 | Not-determined | Genome-fragment | NA    | 0     |
| 510_extracted_99008      | 8018  | Yes | NA | 3  | 1 | Low-quality    | Genome-fragment | 12.79 | 18.56 |
| 58_extracted_k141_46075  | 2274  | No  | NA | 2  | 2 | Not-determined | Genome-fragment | NA    | 0     |
| 58_extracted_k141_37733  | 1727  | No  | NA | 0  | 1 | Not-determined | Genome-fragment | NA    | 0     |
| 511_vs_k141_36310[full]  | 8023  | No  | NA | 2  | 0 | Low-quality    | Genome-fragment | 17.29 | 0     |
| 58_extracted_k141_2900   | 1120  | No  | NA | 0  | 0 | Not-determined | Genome-fragment | NA    | 0     |
| 58_extracted_k141_89682  | 1469  | No  | NA | 0  | 2 | Not-determined | Genome-fragment | NA    | 0     |
| 58_extracted_k141_71785  | 1017  | No  | NA | 0  | 1 | Not-determined | Genome-fragment | NA    | 0     |
| 55_vs_k141_119610[full]  | 8025  | No  | NA | 0  | 1 | Low-quality    | Genome-fragment | 18.48 | 0     |
| 58_extracted_k141_29118  | 5720  | No  | NA | 0  | 2 | Not-determined | Genome-fragment | NA    | 0     |
| 58_extracted_k141_46093  | 1708  | No  | NA | 0  | 2 | Not-determined | Genome-fragment | NA    | 0     |
| 58_extracted_k141_98431  | 1161  | No  | NA | 0  | 0 | Not-determined | Genome-fragment | NA    | 0     |
| 58_extracted_k141_29127  | 1025  | No  | NA | 0  | 0 | Not-determined | Genome-fragment | NA    | 0     |
| 58_extracted_k141_46096  | 1537  | No  | NA | 0  | 2 | Not-determined | Genome-fragment | NA    | 0     |
| 58_extracted_k141_176504 | 3346  | No  | NA | 0  | 2 | Not-determined | Genome-fragment | NA    | 0     |
| 58_extracted_k141_98518  | 1546  | No  | NA | 0  | 2 | Not-determined | Genome-fragment | NA    | 0     |
| 58_extracted_k141_202145 | 4431  | No  | NA | 0  | 3 | Not-determined | Genome-fragment | NA    | 0     |
| 513_extracted_32408      | 8027  | No  | NA | 2  | 0 | Low-quality    | Genome-fragment | 17.74 | 0     |
| 59_extracted_k141_87953  | 8032  | No  | NA | 5  | 0 | Low-quality    | Genome-fragment | 5.28  | 0     |
| 58_extracted_k141_184510 | 2041  | No  | NA | 0  | 2 | Not-determined | Genome-fragment | NA    | 0     |
| 58_extracted_k141_98362  | 2887  | No  | NA | 0  | 1 | Not-determined | Genome-fragment | NA    | 0     |
| 58_extracted_k141_176524 | 3591  | No  | NA | 0  | 2 | Not-determined | Genome-fragment | NA    | 0     |
| 58_extracted_k141_98368  | 1012  | No  | NA | 0  | 1 | Not-determined | Genome-fragment | NA    | 0     |
| 58_extracted_k141_176525 | 1654  | No  | NA | 0  | 1 | Not-determined | Genome-fragment | NA    | 0     |
| 58_extracted_k141_55102  | 1384  | No  | NA | 0  | 0 | Not-determined | Genome-fragment | NA    | 0     |
| 58_vs_k141_44769[full]   | 8038  | No  | NA | 1  | 0 | Low-quality    | Genome-fragment | 5.58  | 0     |
| 58_extracted_k141_2961   | 3237  | No  | NA | 0  | 1 | Not-determined | Genome-fragment | NA    | 0     |
| 58_extracted_k141_202155 | 5516  | No  | NA | 0  | 1 | Not-determined | Genome-fragment | NA    | 0     |
| 58_extracted_k141_2962   | 4155  | No  | NA | 0  | 1 | Not-determined | Genome-fragment | NA    | 0     |
| 517_vs_k141_54375[full]  | 8040  | No  | NA | 0  | 1 | Low-quality    | Genome-fragment | 24.18 | 0     |
| 58_extracted_k141_89768  | 1850  | No  | NA | 0  | 2 | Not-determined | Genome-fragment | NA    | 0     |
| 58_extracted_k141_37793  | 1059  | No  | NA | 0  | 0 | Not-determined | Genome-fragment | NA    | 0     |
| 58_extracted_k141_55128  | 3504  | No  | NA | 0  | 0 | Not-determined | Genome-fragment | NA    | 0     |
| 510_vs_2318[full]        | 8040  | No  | NA | 2  | 1 | Low-quality    | Genome-fragment | 5.33  | 0     |
| 58_extracted_k141_2984   | 2151  | No  | NA | 0  | 0 | Not-determined | Genome-fragment | NA    | 0     |
| 58_extracted_k141_89782  | 2455  | No  | NA | 0  | 1 | Not-determined | Genome-fragment | NA    | 0     |
| 58_extracted_k141_107178 | 2480  | No  | NA | 0  | 2 | Not-determined | Genome-fragment | NA    | 0     |
| 58_extracted_k141_189388 | 4901  | No  | NA | 0  | 1 | Not-determined | Genome-fragment | NA    | 0     |
| 58_extracted_k141_29208  | 2072  | No  | NA | 0  | 2 | Not-determined | Genome-fragment | NA    | 0     |
| 58_extracted_k141_71865  | 7771  | No  | NA | 0  | 4 | Not-determined | Genome-fragment | NA    | 0     |
| 58_extracted_k141_37815  | 1225  | No  | NA | 0  | 0 | Not-determined | Genome-fragment | NA    | 0     |
| 511_vs_k141_58184[full]  | 8045  | No  | NA | 1  | 0 | Low-quality    | Genome-fragment | 17.53 | 0     |
| 58_extracted_k141_176565 | 1215  | No  | NA | 2  | 2 | Not-determined | Genome-fragment | NA    | 0     |
| 511_vs_k141_34149[full]  | 8047  | Yes | NA | 2  | 2 | Low-quality    | Genome-fragment | 8.2   | 39.15 |
| 58_extracted_k141_176886 | 1340  | No  | NA | 0  | 1 | Not-determined | Genome-fragment | NA    | 0     |
| 58_extracted_k141_81206  | 7078  | No  | NA | 0  | 1 | Not-determined | Genome-fragment | NA    | 0     |
| 58_extracted_k141_63842  | 1005  | No  | NA | 0  | 0 | Not-determined | Genome-fragment | NA    | 0     |
| 58_extracted_k141_176578 | 2038  | No  | NA | 0  | 1 | Not-determined | Genome-fragment | NA    | 0     |
| 58_extracted_k141_20375  | 1494  | No  | NA | 0  | 1 | Not-determined | Genome-fragment | NA    | 0     |
| 58_extracted_k141_71895  | 2261  | No  | NA | 0  | 1 | Not-determined | Genome-fragment | NA    | 0     |
| 58_extracted_k141_141842 | 1061  | No  | NA | 0  | 1 | Not-determined | Genome-fragment | NA    | 0     |
| 511_vs_k141_82964[full]  | 8048  | No  | NA | 0  | 2 | Low-quality    | Genome-fragment | 10.29 | 0     |
| 513_extracted_123509     | 8050  | No  | NA | 0  | 0 | Low-quality    | Genome-fragment | NA    | 0     |
| 55_extracted_k141_79389  | 8050  | No  | NA | 10 | 0 | Low-quality    | Genome-fragment | 19.14 | 0     |
| 58_extracted_k141_81215  | 1087  | No  | NA | 0  | 1 | Not-determined | Genome-fragment | NA    | 0     |
| 516_vs_151055[full]      | 8052  | No  | NA | 0  | 1 | Low-quality    | Genome-fragment | 4.71  | 0     |
| 58_extracted_k141_171622 | 8052  | No  | NA | 2  | 2 | Low-quality    | Genome-fragment | 4.22  | 0     |
| 58_extracted_k141_184576 | 8172  | No  | NA | 0  | 7 | Not-determined | Genome-fragment | NA    | 0     |
| 58_extracted_k141_107230 | 4078  | No  | NA | 0  | 2 | Not-determined | Genome-fragment | NA    | 0     |
| 58_extracted_k141_11447  | 1382  | No  | NA | 0  | 3 | Not-determined | Genome-fragment | NA    | 0     |
| 58_extracted_k141_81234  | 1335  | No  | NA | 0  | 0 | Not-determined | Genome-fragment | NA    | 0     |
| 58_extracted_k141_124683 | 1024  | No  | NA | 0  | 1 | Not-determined | Genome-fragment | NA    | 0     |
| 58_extracted_k141_202228 | 4288  | No  | NA | 0  | 2 | Not-determined | Genome-fragment | NA    | 0     |
| 58_extracted_k141_81238  | 3126  | No  | NA | 0  | 0 | Not-determined | Genome-fragment | NA    | 0     |
| 514_vs_k141_79138[full]  | 8056  | No  | NA | 9  | 0 | Low-quality    | Genome-fragment | 19.2  | 0     |
| 58_extracted_k141_89799  | 1138  | No  | NA | 0  | 0 | Not-determined | Genome-fragment | NA    | 0     |
| 58_extracted_k141_29259  | 14554 | No  | NA | 0  | 2 | Not-determined | Genome-fragment | NA    | 0     |
| 58_extracted_k141_3038   | 1643  | No  | NA | 0  | 0 | Not-determined | Genome-fragment | NA    | 0     |
| 58_extracted_k141_141873 | 1249  | No  | NA | 0  | 1 | Not-determined | Genome-fragment | NA    | 0     |
| 53_extracted_k141_98756  | 8056  | No  | NA | 2  | 0 | Low-quality    | Genome-fragment | 18.27 | 0     |
| 58_extracted_k141_98470  | 2662  | No  | NA | 0  | 2 | Not-determined | Genome-fragment | NA    | 0     |
| 58_extracted_k141_184063 | 1452  | No  | NA | 0  | 0 | Not-determined | Genome-fragment | NA    | 0     |
| 58_extracted_k141_20442  | 3017  | No  | NA | 0  | 7 | Not-determined | Genome-fragment | NA    | 0     |
| 58_extracted_k141_115799 | 3180  | No  | NA | 0  | 2 | Not-determined | Genome-fragment | NA    | 0     |
| 58_extracted_k141_184619 | 1075  | No  | NA | 0  | 1 | Not-determined | Genome-fragment | NA    | 0     |
| 58_extracted_k141_202272 | 1518  | No  | NA | 0  | 1 | Not-determined | Genome-fragment | NA    | 0     |
| 511_vs_k141_88356[full]  | 8058  | No  | NA | 0  | 2 | Low-quality    | Genome-fragment | 17.07 | 0     |
| 58_extracted_k141_3064   | 5864  | No  | NA | 0  | 5 | Not-determined | Genome-fragment | NA    | 0     |
| 51_extracted_k141_56259  | 8059  | No  | NA | 0  | 0 | Low-quality    | Genome-fragment | 19.08 | 0     |
| 58_extracted_k141_176611 | 1257  | No  | NA | 0  | 1 | Not-determined | Genome-fragment | NA    | 0     |
| 58_extracted_k141_11491  | 1260  | No  | NA | 0  | 1 | Not-determined | Genome-fragment | NA    | 0     |
| 58_extracted_k141_3075   | 1523  | No  | NA | 0  | 1 | Not-determined | Genome-fragment | NA    | 0     |
| 58_vs_k141_12868[full]   | 8061  | No  | NA | 0  | 1 | Low-quality    | Genome-fragment | 23.64 | 0     |
| 58_extracted_k141_37884  | 1158  | No  | NA | 0  | 0 | Not-determined | Genome-fragment | NA    | 0     |
| 58_extracted_k141_3087   | 1310  | No  | NA | 0  | 1 | Not-determined | Genome-fragment | NA    | 0     |
| 58_extracted_k141_114740 | 1008  | No  | NA | 0  | 0 | Not-determined | Genome-fragment | NA    | 0     |
| 58_extracted_k141_141921 | 1505  | No  | NA | 0  | 0 | Not-determined | Genome-fragment | NA    | 0     |
| 58_extracted_k141_176630 | 1569  | No  | NA | 0  | 1 | Not-determined | Genome-fragment | NA    | 0     |
| 58_extracted_k141_194085 | 1759  | No  | NA | 0  | 1 | Not-determined | Genome-fragment | NA    | 0     |
| 58_extracted_k141_124756 | 1163  | No  | NA | 0  | 0 | Not-determined | Genome-fragment | NA    | 0     |
| 514_vs_k141_90774[full]  | 8063  | No  | NA | 1  | 1 | Low-quality    | Genome-fragment | 17.62 | 0     |
| 58_extracted_k141_141834 | 3563  | No  | NA | 0  | 3 | Not-determined | Genome-fragment | NA    | 0     |
| 58_extracted_k141_194097 | 3308  | No  | NA | 0  | 2 | Not-determined | Genome-fragment | NA    | 0     |
| 58_extracted_k141_63920  | 1389  | No  | NA | 0  | 1 | Not-determined | Genome-fragment | NA    | 0     |
| 58_extracted_k141_89873  | 1819  | No  | NA | 0  | 0 | Not-determined | Genome-fragment | NA    | 0     |
| 58_extracted_k141_113163 | 2707  | No  | NA | 0  | 1 | Not-determined | Genome-fragment | NA    | 0     |
| 58_extracted_k141_194119 | 1360  | No  | NA | 0  | 0 | Not-determined | Genome-fragment | NA    | 0     |
| 58_extracted_k141_55207  | 6533  | No  | NA | 0  | 2 | Not-determined | Genome-fragment | NA    | 0     |
| 58_extracted_k141_2124   | 2345  | No  | NA | 0  | 2 | Not-determined | Genome-fragment | NA    | 0     |
| 58_extracted_k141_20474  | 1338  | No  | NA | 0  | 2 | Not-determined | Genome-fragment | NA    | 0     |
| 515_extracted_37627      | 8063  | No  | NA | 1  | 0 | Low-quality    | Genome-fragment | 7.22  | 0     |
| 58_extracted_k141_176679 | 3560  | No  | NA | 2  | 2 | Not-determined | Genome-fragment | NA    | 0     |
| 58_extracted_k141_20484  | 3032  | No  | NA | 0  | 1 | Not-determined | Genome-fragment | NA    | 0     |
| 57_vs_126362[full]       | 8064  | No  | NA | 0  | 4 | Low-quality    | Genome-fragment | 4.34  | 0     |
| 58_extracted_k141_115888 | 1133  | No  | NA | 0  | 1 | Not-determined | Genome-fragment | NA    | 0     |
| 58_extracted_k141_194139 | 1382  | No  | NA | 0  | 1 | Not-determined | Genome-fragment | NA    | 0     |
| 58_extracted_k141_46244  | 5451  | No  | NA | 0  | 1 | Not-determined | Genome-fragment | NA    | 0     |
| 57_vs_8146[full]         | 8065  | No  | NA | 1  | 0 | Low-quality    | Genome-fragment | 9.21  | 0     |
| 58_extracted_k141_194153 | 1258  | No  | NA | 0  | 1 | Not-determined | Genome-fragment | NA    | 0     |
| 58_extracted_k141_55235  | 1977  | No  | NA | 0  | 2 | Not-determined | Genome-fragment | NA    | 0     |
| 58_extracted_k141_46260  | 2755  | No  | NA | 0  | 4 | Not-determined | Genome-fragment | NA    | 0     |
| 58_extracted_k141_167859 | 1932  | No  | NA | 0  | 0 | Not-determined | Genome-fragment | NA    | 0     |
| 58_extracted_k141_63972  | 19221 | No  | NA | 0  | 7 | Not-determined | Genome-fragment | NA    | 0     |
| 58_extracted_k141_158967 | 1196  | No  | NA | 0  | 1 | Not-determined | Genome-fragment | NA    | 0     |
| 58_extracted_k141_3154   | 1104  | No  | NA | 0  | 0 | Not-determined | Genome-fragment | NA    | 0     |
| 58_extracted_k141_72007  | 1109  | No  | NA | 0  | 0 | Not-determined | Genome-fragment | NA    | 0     |
| 58_extracted_k141_133210 | 3233  | No  | NA | 0  | 3 | Not-determined | Genome-fragment | NA    | 0     |
| 58_extracted_k141_184706 | 1620  | No  | NA | 0  | 2 | Not-determined | Genome-fragment | NA    | 0</   |



|                            |       |     |    |      |   |                |                 |    |       |
|----------------------------|-------|-----|----|------|---|----------------|-----------------|----|-------|
| S8_extracted_k141_142071   | 3505  | No  | NA | 0    | 2 | Not-determined | Genome-fragment | NA | 0     |
| S8_extracted_k141_142081   | 3669  | No  | NA | 0    | 1 | Not-determined | Genome-fragment | NA | 0     |
| S8_extracted_k141_142081   | 1596  | No  | NA | 0    | 0 | Not-determined | Genome-fragment | NA | 0     |
| S8_extracted_k141_142081   | 1285  | No  | NA | 0    | 2 | Not-determined | Genome-fragment | NA | 0     |
| S8_extracted_k141_153131   | 5389  | No  | NA | 0    | 1 | Not-determined | Genome-fragment | NA | 0     |
| S9_vs_k141_63800[full]     | 8097  | No  | NA | 6    | 0 | Low-quality    | Genome-fragment | NA | 19.4  |
| S8_extracted_k141_38061    | 1163  | No  | NA | 0    | 1 | Not-determined | Genome-fragment | NA | 0     |
| S8_extracted_k141_46273    | 2818  | No  | NA | 0    | 2 | Not-determined | Genome-fragment | NA | 0     |
| S8_extracted_k141_58648    | 1002  | No  | NA | 0    | 0 | Not-determined | Genome-fragment | NA | 0     |
| S8_vs_k141_152228[full]    | 8101  | No  | NA | 0    | 0 | Low-quality    | Genome-fragment | NA | 18.6  |
| S8_extracted_k141_202454   | 2920  | No  | NA | 0    | 2 | Not-determined | Genome-fragment | NA | 0     |
| S12_vs_k141_26039[full]    | 8102  | No  | NA | 0    | 0 | Low-quality    | Genome-fragment | NA | 3.97  |
| S12_vs_k141_152860[full]   | 8105  | No  | NA | 5    | 0 | Low-quality    | Genome-fragment | NA | 21.22 |
| S8_extracted_k141_142095   | 1908  | No  | NA | 0    | 3 | Not-determined | Genome-fragment | NA | 0     |
| S8_extracted_k141_119755   | 6081  | No  | NA | 0    | 1 | Not-determined | Genome-fragment | NA | 0     |
| S8_extracted_k141_89969    | 15116 | No  | NA | 16   | 0 | Not-determined | Genome-fragment | NA | 0     |
| S11_vs_k141_100019[full]   | 8106  | No  | NA | 0    | 4 | Low-quality    | Genome-fragment | NA | 2.45  |
| S8_extracted_k141_72119    | 9055  | No  | NA | 0    | 5 | Not-determined | Genome-fragment | NA | 0     |
| S8_extracted_k141_114878   | 8402  | No  | NA | 1    | 0 | Not-determined | Genome-fragment | NA | 0     |
| S8_extracted_k141_11704    | 1379  | No  | NA | 0    | 0 | Not-determined | Genome-fragment | NA | 0     |
| S8_extracted_k141_72122    | 1347  | No  | NA | 0    | 1 | Not-determined | Genome-fragment | NA | 0     |
| S8_extracted_k141_168074   | 4953  | No  | NA | 0    | 3 | Not-determined | Genome-fragment | NA | 0     |
| S8_extracted_k141_184846   | 1294  | No  | NA | 0    | 2 | Not-determined | Genome-fragment | NA | 0     |
| S8_extracted_k141_20641    | 1566  | No  | NA | 0    | 2 | Not-determined | Genome-fragment | NA | 0     |
| S8_extracted_k141_194272   | 4075  | No  | NA | 0    | 3 | Not-determined | Genome-fragment | NA | 0     |
| S12_extracted_k141_18800   | 8113  | No  | NA | 0    | 1 | Low-quality    | Genome-fragment | NA | 6.5   |
| S8_extracted_k141_194273   | 1396  | No  | NA | 0    | 3 | Not-determined | Genome-fragment | NA | 0     |
| S3_vs_k141_104733[full]    | 8117  | No  | NA | 0    | 5 | Low-quality    | Genome-fragment | NA | 4.29  |
| S8_extracted_k141_3128     | 6041  | No  | NA | 0    | 1 | Not-determined | Genome-fragment | NA | 0     |
| S8_extracted_k141_202522   | 1676  | No  | NA | 0    | 1 | Not-determined | Genome-fragment | NA | 0     |
| S8_extracted_k141_70       | 8130  | No  | NA | 2    | 0 | Low-quality    | Genome-fragment | NA | 7.75  |
| S8_extracted_k141_184869   | 2183  | No  | NA | 0    | 2 | Not-determined | Genome-fragment | NA | 0     |
| S8_extracted_k141_107499   | 1473  | No  | NA | 0    | 1 | Not-determined | Genome-fragment | NA | 0     |
| S8_extracted_k141_159168   | 1101  | No  | NA | 0    | 0 | Not-determined | Genome-fragment | NA | 0     |
| S8_extracted_k141_89992    | 1029  | No  | NA | 0    | 1 | Not-determined | Genome-fragment | NA | 0     |
| S8_extracted_k141_114920   | 9140  | No  | NA | 0    | 3 | Not-determined | Genome-fragment | NA | 0     |
| S8_extracted_k141_107508   | 3245  | No  | NA | 0    | 1 | Not-determined | Genome-fragment | NA | 0     |
| S8_extracted_k141_20672    | 1213  | No  | NA | 0    | 1 | Not-determined | Genome-fragment | NA | 0     |
| S3_vs_k141_117077[full]    | 8133  | No  | NA | 0    | 0 | Low-quality    | Genome-fragment | NA | 13.51 |
| S11_extracted_k141_58836   | 8134  | No  | NA | 2    | 0 | Low-quality    | Genome-fragment | NA | 16.99 |
| S8_extracted_k141_90004    | 1652  | No  | NA | 0    | 1 | Not-determined | Genome-fragment | NA | 0     |
| S10_vs_k42639[full]        | 8135  | No  | NA | 0    | 0 | Low-quality    | Genome-fragment | NA | 13.59 |
| S13_extracted_69320        | 8136  | No  | NA | 3    | 0 | Low-quality    | Genome-fragment | NA | 13    |
| S8_extracted_k141_159173   | 16117 | No  | NA | 7    | 0 | Medium-quality | Genome-fragment | NA | 74.52 |
| S8_extracted_k141_38171    | 1992  | No  | NA | 1    | 1 | Not-determined | Genome-fragment | NA | 0     |
| S8_extracted_k141_184888   | 1080  | No  | NA | 0    | 0 | Not-determined | Genome-fragment | NA | 0     |
| S8_extracted_k141_107531   | 2974  | No  | NA | 0    | 0 | Not-determined | Genome-fragment | NA | 0     |
| S8_extracted_k141_81453    | 3222  | No  | NA | 0    | 1 | Not-determined | Genome-fragment | NA | 0     |
| S8_extracted_k141_3197     | 1857  | No  | NA | 0    | 1 | Not-determined | Genome-fragment | NA | 0     |
| S8_extracted_k141_11771    | 1034  | No  | NA | 0    | 1 | Not-determined | Genome-fragment | NA | 0     |
| S8_extracted_k141_90005    | 15542 | No  | NA | 0    | 3 | Not-determined | Genome-fragment | NA | 0     |
| S8_extracted_k141_20181    | 1931  | No  | NA | 0    | 1 | Not-determined | Genome-fragment | NA | 0     |
| S8_extracted_k141_194336   | 1899  | No  | NA | 0    | 1 | Not-determined | Genome-fragment | NA | 0     |
| S10_extracted_16154        | 8138  | No  | NA | 1    | 4 | Low-quality    | Genome-fragment | NA | 20.92 |
| S8_extracted_k141_46362    | 1161  | No  | NA | 0    | 2 | Not-determined | Genome-fragment | NA | 0     |
| S8_extracted_k141_107547   | 4489  | No  | NA | 0    | 0 | Not-determined | Genome-fragment | NA | 0     |
| S8_extracted_k141_184918   | 3205  | No  | NA | 0    | 3 | Not-determined | Genome-fragment | NA | 0     |
| S8_extracted_k141_72206    | 2008  | No  | NA | 0    | 1 | Not-determined | Genome-fragment | NA | 0     |
| S8_extracted_k141_72207    | 2386  | No  | NA | 0    | 1 | Not-determined | Genome-fragment | NA | 0     |
| S8_extracted_k141_194364   | 1814  | No  | NA | 0    | 2 | Not-determined | Genome-fragment | NA | 0     |
| S8_extracted_k141_115975   | 1716  | No  | NA | 0    | 3 | Not-determined | Genome-fragment | NA | 0     |
| S16_vs_186956[full]        | 8150  | No  | NA | 0    | 0 | Low-quality    | Genome-fragment | NA | 4.42  |
| S8_extracted_k141_159230   | 1088  | No  | NA | 0    | 0 | Not-determined | Genome-fragment | NA | 0     |
| S8_extracted_k141_194383   | 1599  | No  | NA | 0    | 0 | Not-determined | Genome-fragment | NA | 0     |
| S8_extracted_k141_194398   | 1034  | No  | NA | 1    | 1 | Not-determined | Genome-fragment | NA | 0     |
| S8_extracted_k141_38226    | 1665  | No  | NA | 0    | 1 | Not-determined | Genome-fragment | NA | 0     |
| S8_extracted_k141_194396   | 1564  | No  | NA | 0    | 2 | Not-determined | Genome-fragment | NA | 0     |
| S8_extracted_k141_38749    | 2177  | No  | NA | 0    | 2 | Not-determined | Genome-fragment | NA | 0     |
| S8_extracted_k141_20756    | 1287  | No  | NA | 0    | 1 | Not-determined | Genome-fragment | NA | 0     |
| S8_extracted_k141_194400   | 4850  | No  | NA | 0    | 0 | Not-determined | Genome-fragment | NA | 0     |
| S8_extracted_k141_107578   | 3704  | No  | NA | 0    | 1 | Not-determined | Genome-fragment | NA | 0     |
| S8_extracted_k141_20641    | 2010  | No  | NA | 0    | 1 | Not-determined | Genome-fragment | NA | 0     |
| S8_extracted_k141_3346     | 1247  | No  | NA | 0    | 4 | Not-determined | Genome-fragment | NA | 0     |
| S8_extracted_k141_125014   | 5182  | No  | NA | 0    | 2 | Not-determined | Genome-fragment | NA | 0     |
| S8_extracted_k141_3349     | 1426  | No  | NA | 0    | 1 | Not-determined | Genome-fragment | NA | 0     |
| S9_vs_k141_27783[full]     | 8154  | No  | NA | 0    | 0 | Low-quality    | Genome-fragment | NA | 7.77  |
| S3_extracted_k141_115704   | 8170  | No  | NA | 0    | 3 | Low-quality    | Genome-fragment | NA | 3.59  |
| S8_extracted_k141_194424   | 1433  | No  | NA | 0    | 1 | Not-determined | Genome-fragment | NA | 0     |
| S8_extracted_k141_115018   | 1000  | No  | NA | 0    | 1 | Not-determined | Genome-fragment | NA | 0     |
| S8_extracted_k141_90076    | 1237  | No  | NA | 0    | 0 | Not-determined | Genome-fragment | NA | 0     |
| S8_extracted_k141_194437   | 2069  | No  | NA | 0    | 1 | Not-determined | Genome-fragment | NA | 0     |
| S8_extracted_k141_142205   | 4721  | No  | NA | 0    | 1 | Not-determined | Genome-fragment | NA | 0     |
| S8_extracted_k141_194444   | 1053  | No  | NA | 0    | 1 | Not-determined | Genome-fragment | NA | 0     |
| S8_extracted_k141_116038   | 1271  | No  | NA | 0    | 0 | Not-determined | Genome-fragment | NA | 0     |
| S8_extracted_k141_90777    | 4755  | No  | NA | 0    | 3 | Not-determined | Genome-fragment | NA | 0     |
| S8_vs_k141_66944[full]     | 8175  | No  | NA | 10   | 0 | Low-quality    | Genome-fragment | NA | 24.41 |
| S8_extracted_k141_55476    | 47707 | No  | NA | 20   | 1 | Complete       | High-quality    | NA | 100   |
| S8_extracted_k141_98789    | 3302  | No  | NA | 0    | 1 | Not-determined | Genome-fragment | NA | 0     |
| S14_vs_k141_136161[full]   | 8177  | No  | NA | 0    | 0 | Low-quality    | Genome-fragment | NA | 24.74 |
| S8_extracted_k141_107625   | 7538  | No  | NA | 0    | 3 | Not-determined | Genome-fragment | NA | 0     |
| S8_extracted_k141_38279    | 4357  | No  | NA | 0    | 2 | Not-determined | Genome-fragment | NA | 0     |
| S8_extracted_k141_3410     | 16677 | No  | NA | 0    | 0 | High-quality   | High-quality    | NA | 97.92 |
| S8_extracted_k141_194457   | 5011  | No  | NA | 0    | 4 | Not-determined | Genome-fragment | NA | 0     |
| S8_extracted_k141_202596   | 1334  | No  | NA | 0    | 0 | Not-determined | Genome-fragment | NA | 0     |
| S8_extracted_k141_202604   | 3067  | No  | NA | 0    | 3 | Not-determined | Genome-fragment | NA | 0     |
| S8_extracted_k141_90147    | 2807  | No  | NA | 0    | 2 | Not-determined | Genome-fragment | NA | 0     |
| S8_extracted_k141_46458    | 1437  | No  | NA | 0    | 1 | Not-determined | Genome-fragment | NA | 0     |
| S17_vs_k141_61263[full]    | 8179  | No  | NA | 2    | 1 | Low-quality    | Genome-fragment | NA | 12.9  |
| S8_extracted_k141_20750    | 1007  | No  | NA | 0    | 1 | Not-determined | Genome-fragment | NA | 0     |
| S8_extracted_k141_194470   | 1147  | No  | NA | 0    | 1 | Not-determined | Genome-fragment | NA | 0     |
| S8_extracted_k141_119353   | 1386  | No  | NA | 0    | 1 | Not-determined | Genome-fragment | NA | 0     |
| S8_extracted_k141_107652   | 5872  | No  | NA | 0    | 2 | Not-determined | Genome-fragment | NA | 0     |
| S8_extracted_k141_3438     | 6562  | No  | NA | 0    | 4 | Not-determined | Genome-fragment | NA | 0     |
| S5_vs_k141_12444[full]     | 8181  | No  | NA | 0    | 9 | Low-quality    | Genome-fragment | NA | 3.4   |
| S8_extracted_k141_72329    | 42922 | No  | NA | 19   | 0 | Complete       | High-quality    | NA | 100   |
| S8_extracted_k141_150659   | 7104  | No  | NA | 0    | 3 | Not-determined | Genome-fragment | NA | 0     |
| S8_extracted_k141_168204   | 1406  | No  | NA | 0    | 1 | Not-determined | Genome-fragment | NA | 0     |
| S12_vs_k141_75643[full]    | 8183  | Yes | NA | 3    | 2 | Low-quality    | Genome-fragment | NA | 15.17 |
| S8_extracted_k141_98846    | 1355  | No  | NA | 4889 | 0 | Not-determined | Genome-fragment | NA | 32.92 |
| S8_extracted_k141_194493   | 2195  | No  | NA | 0    | 0 | Not-determined | Genome-fragment | NA | 0     |
| S8_extracted_k141_11794    | 13413 | No  | NA | 36   | 4 | Complete       | High-quality    | NA | 100   |
| S8_extracted_k141_202621   | 1217  | No  | NA | 0    | 0 | Not-determined | Genome-fragment | NA | 0     |
| S8_extracted_k141_81608    | 1356  | No  | NA | 0    | 0 | Not-determined | Genome-fragment | NA | 0     |
| S8_extracted_k141_168226   | 1034  | No  | NA | 0    | 1 | Not-determined | Genome-fragment | NA | 0     |
| S8_extracted_k141_159386   | 3872  | No  | NA | 0    | 1 | Not-determined | Genome-fragment | NA | 0     |
| S8_extracted_k141_168230   | 1208  | No  | NA | 0    | 0 | Not-determined | Genome-fragment | NA | 0     |
| S16_vs_50987[full]         | 8185  | No  | NA | 0    | 5 | Low-quality    | Genome-fragment | NA | 5.84  |
| S5_extracted_k141_10159    | 8189  | No  | NA | 4    | 0 | Low-quality    | Genome-fragment | NA | 6.66  |
| S8_extracted_k141_72367    | 1422  | No  | NA | 0    | 2 | Not-determined | Genome-fragment | NA | 0     |
| S8_extracted_k141_55566    | 1120  | No  | NA | 0    | 0 | Not-determined | Genome-fragment | NA | 0     |
| S8_extracted_k141_202644   | 4347  | No  | NA | 0    | 2 | Not-determined | Genome-fragment | NA | 0     |
| S3_extracted_k141_27957    | 8158  | No  | NA | 0    | 1 | Low-quality    | Genome-fragment | NA | 4.64  |
| S3_vs_k141_86379[full]     | 8200  | No  | NA | 3    | 0 | Low-quality    | Genome-fragment | NA | 4.8   |
| S8_extracted_k141_107706   | 1094  | No  | NA | 0    | 0 | Not-determined | Genome-fragment | NA | 0     |
| S8_extracted_k141_55577    | 2313  | No  | NA | 0    | 2 | Not-determined | Genome-fragment | NA | 0     |
| S8_extracted_k141_150709   | 1280  | No  | NA | 0    | 0 | Not-determined | Genome-fragment | NA | 0     |
| S8_extracted_k141_202661   | 1469  | No  | NA | 0    | 1 | Not-determined | Genome-fragment | NA | 0     |
| S16_vs_k1773[full]         | 8200  | No  | NA | 0    | 0 | Low-quality    | Genome-fragment | NA | 11.9  |
| S8_extracted_k141_46540    | 1213  | No  | NA | 0    | 2 | Not-determined | Genome-fragment | NA | 0     |
| S8_extracted_k141_185047   | 1582  | No  | NA | 0    | 1 | Not-determined | Genome-fragment | NA | 0     |
| S8_extracted_k141_3520     | 1275  | No  | NA | 0    | 0 | Not-determined | Genome-fragment | NA | 0     |
| S10_extracted_18916        | 8202  | No  | NA | 0    | 1 | Low-quality    | Genome-fragment | NA | 15.64 |
| S14_vs_k141_776461[full]   | 8206  | No  | NA | 8    | 0 | Low-quality    | Genome-fragment | NA | 22.97 |
| S8_extracted_k141_168260   | 2253  | No  | NA | 0    | 0 | Not-determined | Genome-fragment | NA | 0     |
| S8_extracted_k141_185054   | 1801  | No  | NA | 0    | 1 | Not-determined | Genome-fragment | NA | 0     |
| S8_extracted_k141_98886    | 1256  | No  | NA | 0    | 1 | Not-determined | Genome-fragment | NA | 0     |
| S8_extracted_k141_159427   | 1256  | No  | NA | 0    | 1 | Not-determined | Genome-fragment | NA | 0     |
| S8_extracted_k141_46555    | 1480  | No  | NA | 0    | 0 | Not-determined | Genome-fragment | NA | 0     |
| S8_extracted_k141_159434   | 1234  | No  | NA | 0    | 1 | Not-determined | Genome-fragment | NA | 0     |
| S8_extracted_k141_90215    | 1609  | No  | NA | 0    | 2 | Not-determined | Genome-fragment | NA | 0     |
| S8_extracted_k141_115073   | 5019  | No  | NA | 0    | 3 | Not-determined | Genome-fragment | NA | 0     |
| S8_extracted_k141_81648    | 6957  | No  | NA | 1    | 0 | Not-determined | Genome-fragment | NA | 0     |
| S8_extracted_k141_107761   | 1317  | No  | NA | 0    | 1 | Not-determined | Genome-fragment | NA | 0     |
| S6_extracted_k141_29444    | 8208  | No  | NA | 1    | 1 | Low-quality    | Genome-fragment | NA | 25.44 |
| S12_extracted_k141_15139   | 8209  | No  | NA | 0    | 0 | Low-quality    | Genome-fragment | NA | 14.09 |
| S8_extracted_k141_185097</ |       |     |    |      |   |                |                 |    |       |



|                           |       |     |    |      |   |                |                 |       |       |
|---------------------------|-------|-----|----|------|---|----------------|-----------------|-------|-------|
| 58_extracted_k141_38313   | 2719  | No  | NA | 0    | 1 | Not-determined | Genome-fragment | NA    | 0     |
| 58_extracted_k141_38991   | 1667  | No  | NA | 0    | 1 | Not-determined | Genome-fragment | NA    | 0     |
| 58_extracted_k141_116241  | 1321  | No  | NA | 0    | 1 | Not-determined | Genome-fragment | NA    | 0     |
| 58_extracted_k141_116242  | 1015  | No  | NA | 0    | 0 | Not-determined | Genome-fragment | NA    | 0     |
| 58_extracted_k141_177129  | 1088  | No  | NA | 0    | 1 | Not-determined | Genome-fragment | NA    | 0     |
| 513_vs_119802[full]       | 8236  | No  | NA | 1    | 0 | Low-quality    | Genome-fragment | 20.35 | 0     |
| 58_extracted_k141_1668373 | 5817  | No  | NA | 0    | 4 | Not-determined | Genome-fragment | NA    | 0     |
| 58_extracted_k141_116248  | 1198  | No  | NA | 0    | 1 | Not-determined | Genome-fragment | NA    | 0     |
| 58_extracted_k141_11902   | 1129  | No  | NA | 0    | 2 | Not-determined | Genome-fragment | NA    | 0     |
| 58_extracted_k141_20992   | 1980  | No  | NA | 0    | 3 | Not-determined | Genome-fragment | NA    | 0     |
| 516_extracted_57276       | 8230  | No  | NA | 0    | 6 | Low-quality    | Genome-fragment | 7.5   | 0     |
| 58_extracted_k141_125189  | 1227  | No  | NA | 0    | 0 | Not-determined | Genome-fragment | NA    | 0     |
| 58_extracted_k141_125190  | 1798  | No  | NA | 0    | 1 | Not-determined | Genome-fragment | NA    | 0     |
| 58_vs_k141_59642[full]    | 8231  | No  | NA | 4    | 0 | Low-quality    | Genome-fragment | 20.01 | 0     |
| 58_extracted_k141_90314   | 5386  | No  | NA | 0    | 4 | Not-determined | Genome-fragment | NA    | 0     |
| 58_extracted_k141_55689   | 1307  | No  | NA | 0    | 1 | Not-determined | Genome-fragment | NA    | 0     |
| 58_extracted_k141_107861  | 1021  | No  | NA | 0    | 1 | Not-determined | Genome-fragment | NA    | 0     |
| 58_extracted_k141_107864  | 1097  | No  | NA | 0    | 1 | Not-determined | Genome-fragment | NA    | 0     |
| 58_extracted_k141_142422  | 1257  | No  | NA | 0    | 0 | Not-determined | Genome-fragment | NA    | 0     |
| 58_extracted_k141_38329   | 1438  | No  | NA | 0    | 1 | Not-determined | Genome-fragment | NA    | 0     |
| 58_extracted_k141_159535  | 4064  | No  | NA | 0    | 1 | Not-determined | Genome-fragment | NA    | 0     |
| 58_extracted_k141_3676    | 1900  | No  | NA | 0    | 1 | Not-determined | Genome-fragment | NA    | 0     |
| 58_extracted_k141_185160  | 1128  | No  | NA | 0    | 1 | Not-determined | Genome-fragment | NA    | 0     |
| 511_extracted_k141_91335  | 8234  | Yes | NA | 6031 | 1 | Low-quality    | Genome-fragment | 4.32  | 26.75 |
| 58_extracted_k141_55704   | 2148  | No  | NA | 0    | 1 | Not-determined | Genome-fragment | NA    | 0     |
| 58_extracted_k141_150833  | 1070  | No  | NA | 0    | 1 | Not-determined | Genome-fragment | NA    | 0     |
| 58_extracted_k141_159546  | 3391  | No  | NA | 0    | 2 | Not-determined | Genome-fragment | NA    | 0     |
| 58_extracted_k141_202808  | 1396  | No  | NA | 0    | 1 | Not-determined | Genome-fragment | NA    | 0     |
| 58_extracted_k141_11520   | 1351  | No  | NA | 0    | 1 | Not-determined | Genome-fragment | NA    | 0     |
| 58_extracted_k141_168415  | 1071  | No  | NA | 0    | 1 | Not-determined | Genome-fragment | NA    | 0     |
| 58_extracted_k141_90342   | 1131  | No  | NA | 0    | 1 | Not-determined | Genome-fragment | NA    | 0     |
| 58_extracted_k141_194658  | 1402  | No  | NA | 0    | 1 | Not-determined | Genome-fragment | NA    | 0     |
| 58_extracted_k141_125211  | 1798  | No  | NA | 0    | 1 | Not-determined | Genome-fragment | NA    | 0     |
| 58_extracted_k141_168418  | 3945  | No  | NA | 0    | 0 | Not-determined | Genome-fragment | NA    | 0     |
| 58_extracted_k141_168421  | 1059  | No  | NA | 0    | 2 | Not-determined | Genome-fragment | NA    | 0     |
| 512_vs_k141_191641[full]  | 8236  | No  | NA | 0    | 1 | Low-quality    | Genome-fragment | 14.94 | 0     |
| 58_extracted_k141_72526   | 1222  | No  | NA | 0    | 2 | Not-determined | Genome-fragment | NA    | 0     |
| 58_extracted_k141_29945   | 1297  | No  | NA | 0    | 0 | Not-determined | Genome-fragment | NA    | 0     |
| 58_extracted_k141_18518   | 2555  | No  | NA | 0    | 2 | Not-determined | Genome-fragment | NA    | 0     |
| 58_extracted_k141_159556  | 3935  | No  | NA | 0    | 2 | Not-determined | Genome-fragment | NA    | 0     |
| 58_extracted_k141_90358   | 2164  | No  | NA | 0    | 0 | Not-determined | Genome-fragment | NA    | 0     |
| 58_extracted_k141_107885  | 2460  | No  | NA | 0    | 1 | Not-determined | Genome-fragment | NA    | 0     |
| 58_extracted_k141_55734   | 3079  | No  | NA | 0    | 2 | Not-determined | Genome-fragment | NA    | 0     |
| 58_extracted_k141_72534   | 1403  | No  | NA | 0    | 1 | Not-determined | Genome-fragment | NA    | 0     |
| 58_extracted_k141_116316  | 1301  | No  | NA | 0    | 1 | Not-determined | Genome-fragment | NA    | 0     |
| 58_extracted_k141_55743   | 3815  | No  | NA | 0    | 4 | Not-determined | Genome-fragment | NA    | 0     |
| 58_extracted_k141_81741   | 1390  | No  | NA | 0    | 3 | Not-determined | Genome-fragment | NA    | 0     |
| 58_extracted_k141_3725    | 1022  | No  | NA | 0    | 1 | Not-determined | Genome-fragment | NA    | 0     |
| 58_extracted_k141_90379   | 8517  | No  | NA | 0    | 1 | Not-determined | Genome-fragment | NA    | 0     |
| 58_extracted_k141_125245  | 3625  | No  | NA | 0    | 0 | Not-determined | Genome-fragment | NA    | 0     |
| 517_vs_k141_142027[full]  | 8241  | Yes | NA | 5832 | 2 | Low-quality    | Genome-fragment | 5.23  | 29.23 |
| 58_extracted_k141_55757   | 4466  | No  | NA | 0    | 1 | Not-determined | Genome-fragment | NA    | 0     |
| 58_extracted_k141_72563   | 2095  | No  | NA | 0    | 2 | Not-determined | Genome-fragment | NA    | 0     |
| 58_extracted_k141_46705   | 1164  | No  | NA | 0    | 1 | Not-determined | Genome-fragment | NA    | 0     |
| 512_vs_k141_36331[full]   | 8243  | No  | NA | 1    | 1 | Low-quality    | Genome-fragment | 15.9  | 0     |
| 58_extracted_k141_90383   | 3960  | No  | NA | 0    | 1 | Not-determined | Genome-fragment | NA    | 0     |
| 58_extracted_k141_29991   | 4479  | No  | NA | 0    | 2 | Not-determined | Genome-fragment | NA    | 0     |
| 58_extracted_k141_116350  | 1016  | No  | NA | 0    | 1 | Not-determined | Genome-fragment | NA    | 0     |
| 58_extracted_k141_81762   | 1842  | No  | NA | 0    | 0 | Not-determined | Genome-fragment | NA    | 0     |
| 58_extracted_k141_150875  | 1495  | No  | NA | 0    | 0 | Not-determined | Genome-fragment | NA    | 0     |
| 58_extracted_k141_81765   | 2269  | No  | NA | 0    | 0 | Not-determined | Genome-fragment | NA    | 0     |
| 515_vs_k141_113676[full]  | 8255  | No  | NA | 0    | 0 | Low-quality    | Genome-fragment | 17.84 | 0     |
| 58_extracted_k141_72588   | 1118  | No  | NA | 0    | 1 | Not-determined | Genome-fragment | NA    | 0     |
| 514_vs_k141_106512[full]  | 8264  | No  | NA | 4    | 0 | Low-quality    | Genome-fragment | 18.27 | 0     |
| 58_extracted_k141_125267  | 1762  | No  | NA | 0    | 1 | Not-determined | Genome-fragment | NA    | 0     |
| 58_vs_k141_22526[full]    | 8266  | No  | NA | 9    | 0 | Low-quality    | Genome-fragment | 13.7  | 0     |
| 58_extracted_k141_107926  | 3041  | No  | NA | 0    | 2 | Not-determined | Genome-fragment | NA    | 0     |
| 58_extracted_k141_168487  | 3203  | No  | NA | 0    | 3 | Not-determined | Genome-fragment | NA    | 0     |
| 58_extracted_k141_107939  | 1248  | No  | NA | 0    | 1 | Not-determined | Genome-fragment | NA    | 0     |
| 516_extracted_36137       | 8272  | No  | NA | 1    | 0 | Low-quality    | Genome-fragment | 21.44 | 0     |
| 58_extracted_k141_142516  | 1350  | No  | NA | 0    | 1 | Not-determined | Genome-fragment | NA    | 0     |
| 58_extracted_k141_46735   | 2515  | No  | NA | 0    | 1 | Not-determined | Genome-fragment | NA    | 0     |
| 58_extracted_k141_46741   | 1511  | No  | NA | 0    | 1 | Not-determined | Genome-fragment | NA    | 0     |
| 58_extracted_k141_159634  | 1038  | No  | NA | 0    | 1 | Not-determined | Genome-fragment | NA    | 0     |
| 58_extracted_k141_202892  | 1214  | No  | NA | 0    | 2 | Not-determined | Genome-fragment | NA    | 0     |
| 517_vs_2354[full]         | 8277  | Yes | NA | 6430 | 3 | Low-quality    | Genome-fragment | 8.15  | 22.31 |
| 58_extracted_k141_116401  | 1208  | No  | NA | 0    | 1 | Not-determined | Genome-fragment | NA    | 0     |
| 58_extracted_k141_55811   | 2147  | No  | NA | 0    | 1 | Not-determined | Genome-fragment | NA    | 0     |
| 58_extracted_k141_15091   | 1655  | No  | NA | 0    | 1 | Not-determined | Genome-fragment | NA    | 0     |
| 58_extracted_k141_55814   | 1495  | No  | NA | 0    | 1 | Not-determined | Genome-fragment | NA    | 0     |
| 58_extracted_k141_159652  | 3356  | No  | NA | 0    | 3 | Not-determined | Genome-fragment | NA    | 0     |
| 58_extracted_k141_107971  | 9656  | No  | NA | 0    | 1 | Not-determined | Genome-fragment | NA    | 0     |
| 58_extracted_k141_168535  | 1073  | No  | NA | 0    | 1 | Not-determined | Genome-fragment | NA    | 0     |
| 58_extracted_k141_142561  | 1696  | No  | NA | 0    | 1 | Not-determined | Genome-fragment | NA    | 0     |
| 58_extracted_k141_177246  | 7131  | No  | NA | 0    | 1 | Not-determined | Genome-fragment | NA    | 0     |
| 58_extracted_k141_107980  | 1234  | No  | NA | 0    | 0 | Not-determined | Genome-fragment | NA    | 0     |
| 512_vs_k141_60442[full]   | 8289  | No  | NA | 0    | 3 | Low-quality    | Genome-fragment | 2.67  | 0     |
| 54_extracted_12572        | 8296  | No  | NA | 7    | 0 | Low-quality    | Genome-fragment | 15.15 | 0     |
| 58_extracted_k141_46772   | 1102  | No  | NA | 0    | 0 | Not-determined | Genome-fragment | NA    | 0     |
| 58_extracted_k141_21082   | 1055  | No  | NA | 0    | 1 | Not-determined | Genome-fragment | NA    | 0     |
| 51_extracted_k141_114116  | 8300  | No  | NA | 1    | 0 | Low-quality    | Genome-fragment | 6.26  | 0     |
| 58_extracted_k141_20291   | 1347  | No  | NA | 0    | 1 | Not-determined | Genome-fragment | NA    | 0     |
| 58_extracted_k141_90436   | 3074  | No  | NA | 0    | 2 | Not-determined | Genome-fragment | NA    | 0     |
| 58_extracted_k141_133616  | 1039  | No  | NA | 0    | 0 | Not-determined | Genome-fragment | NA    | 0     |
| 511_vs_k141_46861[full]   | 8307  | No  | NA | 0    | 0 | Low-quality    | Genome-fragment | 18.05 | 0     |
| 58_extracted_k141_3825    | 1508  | No  | NA | 0    | 0 | Not-determined | Genome-fragment | NA    | 0     |
| 58_extracted_k141_46782   | 1032  | No  | NA | 0    | 2 | Not-determined | Genome-fragment | NA    | 0     |
| 58_extracted_k141_55844   | 4278  | No  | NA | 0    | 3 | Not-determined | Genome-fragment | NA    | 0     |
| 58_extracted_k141_11939   | 2020  | No  | NA | 0    | 1 | Not-determined | Genome-fragment | NA    | 0     |
| 58_extracted_k141_202935  | 1017  | No  | NA | 0    | 0 | Not-determined | Genome-fragment | NA    | 0     |
| 58_extracted_k141_30079   | 1077  | No  | NA | 0    | 2 | Not-determined | Genome-fragment | NA    | 0     |
| 58_extracted_k141_90456   | 4000  | No  | NA | 0    | 2 | Not-determined | Genome-fragment | NA    | 0     |
| 58_extracted_k141_90458   | 1127  | No  | NA | 0    | 1 | Not-determined | Genome-fragment | NA    | 0     |
| 58_extracted_k141_125330  | 1371  | No  | NA | 0    | 0 | Not-determined | Genome-fragment | NA    | 0     |
| 58_extracted_k141_155867  | 4959  | No  | NA | 0    | 1 | Not-determined | Genome-fragment | NA    | 0     |
| 53_extracted_k141_83102   | 8309  | No  | NA | 10   | 0 | Low-quality    | Genome-fragment | 27.4  | 0     |
| 58_extracted_k141_125331  | 1078  | No  | NA | 0    | 1 | Not-determined | Genome-fragment | NA    | 0     |
| 58_extracted_k141_30094   | 2513  | No  | NA | 0    | 0 | Not-determined | Genome-fragment | NA    | 0     |
| 516_extracted_41589       | 8310  | No  | NA | 0    | 0 | Low-quality    | Genome-fragment | 26.45 | 0     |
| 58_extracted_k141_3869    | 1346  | No  | NA | 0    | 2 | Not-determined | Genome-fragment | NA    | 0     |
| 58_extracted_k141_72705   | 1758  | No  | NA | 0    | 0 | Not-determined | Genome-fragment | NA    | 0     |
| 58_extracted_k141_108019  | 2674  | No  | NA | 0    | 1 | Not-determined | Genome-fragment | NA    | 0     |
| 58_extracted_k141_72710   | 1200  | No  | NA | 0    | 1 | Not-determined | Genome-fragment | NA    | 0     |
| 58_extracted_k141_177307  | 1487  | No  | NA | 0    | 1 | Not-determined | Genome-fragment | NA    | 0     |
| 58_extracted_k141_17730   | 1026  | No  | NA | 0    | 1 | Not-determined | Genome-fragment | NA    | 0     |
| 58_extracted_k141_90478   | 1040  | No  | NA | 0    | 2 | Not-determined | Genome-fragment | NA    | 0     |
| 58_extracted_k141_150985  | 3074  | No  | NA | 0    | 1 | Not-determined | Genome-fragment | NA    | 0     |
| 58_extracted_k141_202959  | 4060  | No  | NA | 0    | 3 | Not-determined | Genome-fragment | NA    | 0     |
| 58_extracted_k141_55892   | 2209  | No  | NA | 0    | 1 | Not-determined | Genome-fragment | NA    | 0     |
| 58_extracted_k141_116474  | 1661  | No  | NA | 0    | 2 | Not-determined | Genome-fragment | NA    | 0     |
| 58_extracted_k141_90493   | 1148  | No  | NA | 0    | 1 | Not-determined | Genome-fragment | NA    | 0     |
| 515_vs_k141_50651[full]   | 8320  | No  | NA | 0    | 0 | Low-quality    | Genome-fragment | 17.51 | 0     |
| 51_vs_k141_18950[full]    | 8322  | No  | NA | 0    | 4 | Low-quality    | Genome-fragment | 3.85  | 0     |
| 58_extracted_k141_11584   | 1117  | No  | NA | 0    | 1 | Not-determined | Genome-fragment | NA    | 0     |
| 58_extracted_k141_90495   | 10373 | No  | NA | 0    | 1 | Not-determined | Genome-fragment | NA    | 0     |
| 56_vs_k141_26406[full]    | 8329  | Yes | NA | 5384 | 1 | Low-quality    | Genome-fragment | 9.29  | 35.36 |
| 58_extracted_k141_168607  | 1233  | No  | NA | 0    | 0 | Not-determined | Genome-fragment | NA    | 0     |
| 58_extracted_k141_168608  | 4658  | No  | NA | 0    | 3 | Not-determined | Genome-fragment | NA    | 0     |
| 58_extracted_k141_12002   | 1899  | No  | NA | 0    | 0 | Not-determined | Genome-fragment | NA    | 0     |
| 58_extracted_k141_12004   | 1357  | No  | NA | 0    | 0 | Not-determined | Genome-fragment | NA    | 0     |
| 53_extracted_k141_78956   | 8330  | No  | NA | 0    | 0 | Low-quality    | Genome-fragment | 4.06  | 0     |
| 58_extracted_k141_151038  | 2861  | No  | NA | 0    | 1 | Not-determined | Genome-fragment | NA    | 0     |
| 58_extracted_k141_81806   | 2173  | No  | NA | 0    | 0 | Not-determined | Genome-fragment | NA    | 0     |
| 58_extracted_k141_202981  | 3209  | No  | NA | 0    | 0 | Not-determined | Genome-fragment | NA    | 0     |
| 58_extracted_k141_194813  | 3474  | No  | NA | 0    | 1 | Not-determined | Genome-fragment | NA    | 0     |
| 58_extracted_k141_125398  | 1655  | No  | NA | 0    | 1 | Not-determined | Genome-fragment | NA    | 0     |
| 58_extracted_k141_99270   | 1983  | No  | NA | 0    | 1 | Not-determined | Genome-fragment | NA    | 0     |
| 510_extracted_33125       | 8330  | No  | NA | 5    | 0 | Low-quality    | Genome-fragment | 19.71 | 0     |
| 58_extracted_k141_72766   | 5065  | No  | NA | 0    | 4 | Not-determined | Genome-fragment | NA    | 0     |
| 58_extracted_k141_151055  | 3090  | No  | NA | 0    | 1 | Not-determined | Genome-fragment | NA    | 0     |
| 58_extracted_k141_21189   | 1019  | No  | NA | 0    | 2 | Not-determined | Genome-fragment | NA    | 0     |
| 58_extracted_k141_168076  | 2856  | No  | NA | 8    | 4 | Not-determined | Genome-fragment | NA    | 0     |
| 58_extracted_k141_151059  | 1792  | No  | NA | 0    | 3 | Not-determined | Genome-fragment | NA    | 0     |
| 58_extracted_k141_72769   | 3968  | No  | NA | 0    |   |                |                 |       |       |



|                           |       |     |       |    |   |                |                 |       |       |
|---------------------------|-------|-----|-------|----|---|----------------|-----------------|-------|-------|
| 58_extracted_k141_185378  | 1151  | No  | NA    | 0  | 1 | Not-determined | Genome-fragment | NA    | 0     |
| 58_extracted_k141_159773  | 1368  | No  | NA    | 0  | 0 | Not-determined | Genome-fragment | NA    | 0     |
| 58_extracted_k141_108122  | 1838  | No  | NA    | 0  | 0 | Not-determined | Genome-fragment | NA    | 0     |
| 58_extracted_k141_12129   | 1279  | No  | NA    | 0  | 1 | Not-determined | Genome-fragment | NA    | 0     |
| 57_extracted_138217       | 8381  | No  | NA    | 2  | 1 | Low-quality    | Genome-fragment | NA    | 17.83 |
| 58_extracted_k141_90634   | 2388  | No  | NA    | 0  | 3 | Not-determined | Genome-fragment | NA    | 0     |
| 58_extracted_k141_38529   | 2444  | No  | NA    | 0  | 1 | Not-determined | Genome-fragment | NA    | 0     |
| 58_extracted_k141_159788  | 2179  | No  | NA    | 0  | 1 | Not-determined | Genome-fragment | NA    | 0     |
| 58_extracted_k141_15112   | 1379  | No  | NA    | 0  | 1 | Not-determined | Genome-fragment | NA    | 0     |
| 52_extracted_k141_19276   | 8381  | No  | NA    | 1  | 0 | Low-quality    | Genome-fragment | 9     | 0     |
| 58_extracted_k141_185408  | 1751  | No  | NA    | 0  | 1 | Not-determined | Genome-fragment | NA    | 0     |
| 58_extracted_k141_168730  | 6104  | No  | NA    | 0  | 3 | Not-determined | Genome-fragment | NA    | 0     |
| 59_vs_k141_81453  full    | 8388  | No  | NA    | 2  | 0 | Low-quality    | Genome-fragment | 21.97 | 0     |
| 58_extracted_k141_194914  | 1322  | No  | NA    | 0  | 0 | Not-determined | Genome-fragment | NA    | 0     |
| 58_extracted_k141_90660   | 1537  | No  | NA    | 0  | 0 | Not-determined | Genome-fragment | NA    | 0     |
| 53_extracted_k141_113245  | 8388  | Yes | 2542  | 1  | 1 | Low-quality    | Genome-fragment | 0.71  | 69.69 |
| 58_extracted_k141_81871   | 3702  | No  | NA    | 0  | 2 | Not-determined | Genome-fragment | NA    | 0     |
| 53_vs_k141_107181  full   | 8389  | No  | NA    | 4  | 0 | Low-quality    | Genome-fragment | 12.34 | 0     |
| 58_extracted_k141_141434  | 8389  | No  | NA    | 2  | 0 | Low-quality    | Genome-fragment | 15.76 | 0     |
| 58_extracted_k141_90678   | 1800  | No  | NA    | 0  | 1 | Not-determined | Genome-fragment | NA    | 0     |
| 58_extracted_k141_72843   | 7351  | No  | NA    | 0  | 1 | Not-determined | Genome-fragment | NA    | 0     |
| 58_extracted_k141_177465  | 3751  | No  | NA    | 0  | 1 | Not-determined | Genome-fragment | NA    | 0     |
| 58_extracted_k141_203089  | 1252  | No  | NA    | 0  | 1 | Not-determined | Genome-fragment | NA    | 0     |
| 58_extracted_k141_125546  | 1926  | No  | NA    | 0  | 0 | Not-determined | Genome-fragment | NA    | 0     |
| 58_extracted_k141_4036    | 1119  | No  | NA    | 0  | 1 | Not-determined | Genome-fragment | NA    | 0     |
| 58_extracted_k141_158484  | 2153  | No  | NA    | 0  | 2 | Not-determined | Genome-fragment | NA    | 0     |
| 58_extracted_k141_185435  | 6726  | No  | NA    | 0  | 6 | Not-determined | Genome-fragment | NA    | 0     |
| 57_vs_5048  full          | 8397  | No  | NA    | 3  | 0 | Low-quality    | Genome-fragment | 18.62 | 0     |
| 58_extracted_k141_38575   | 1446  | No  | NA    | 0  | 0 | Not-determined | Genome-fragment | NA    | 0     |
| 58_extracted_k141_177469  | 1450  | No  | NA    | 0  | 2 | Not-determined | Genome-fragment | NA    | 0     |
| 58_extracted_k141_72854   | 5775  | No  | NA    | 0  | 2 | Not-determined | Genome-fragment | NA    | 0     |
| 58_extracted_k141_121197  | 1030  | No  | NA    | 0  | 2 | Not-determined | Genome-fragment | NA    | 0     |
| 58_extracted_k141_194956  | 1643  | No  | NA    | 0  | 3 | Not-determined | Genome-fragment | NA    | 0     |
| 55_vs_k141_135172  full   | 8404  | No  | NA    | 0  | 1 | Low-quality    | Genome-fragment | 11.69 | 0     |
| 58_extracted_k141_108193  | 1247  | No  | NA    | 0  | 0 | Not-determined | Genome-fragment | NA    | 0     |
| 58_extracted_k141_81896   | 3798  | No  | NA    | 0  | 3 | Not-determined | Genome-fragment | NA    | 0     |
| 58_extracted_k141_203099  | 1360  | No  | NA    | 0  | 1 | Not-determined | Genome-fragment | NA    | 0     |
| 58_extracted_k141_72866   | 6136  | No  | NA    | 0  | 4 | Not-determined | Genome-fragment | NA    | 0     |
| 58_extracted_k141_125571  | 1311  | No  | NA    | 0  | 1 | Not-determined | Genome-fragment | NA    | 0     |
| 58_extracted_k141_30380   | 2187  | No  | NA    | 0  | 1 | Not-determined | Genome-fragment | NA    | 0     |
| 58_extracted_k141_56091   | 3127  | No  | NA    | 0  | 4 | Not-determined | Genome-fragment | NA    | 0     |
| 58_extracted_k141_15117   | 2485  | No  | NA    | 0  | 2 | Not-determined | Genome-fragment | NA    | 0     |
| 512_extracted_k141_169360 | 8406  | No  | NA    | 0  | 1 | Low-quality    | Genome-fragment | 18.08 | 0     |
| 58_extracted_k141_21295   | 10380 | No  | NA    | 0  | 7 | Not-determined | Genome-fragment | NA    | 0     |
| 53_extracted_k141_90881   | 8409  | No  | NA    | 5  | 0 | Low-quality    | Genome-fragment | 14.42 | 0     |
| 58_extracted_k141_203132  | 1012  | No  | NA    | 0  | 0 | Not-determined | Genome-fragment | NA    | 0     |
| 58_extracted_k141_81910   | 4920  | No  | NA    | 0  | 3 | Not-determined | Genome-fragment | NA    | 0     |
| 58_extracted_k141_40635   | 3116  | No  | NA    | 0  | 2 | Not-determined | Genome-fragment | NA    | 0     |
| 58_extracted_k141_10821   | 2055  | No  | NA    | 0  | 0 | Not-determined | Genome-fragment | NA    | 0     |
| 58_extracted_k141_159835  | 1349  | No  | NA    | 0  | 3 | Not-determined | Genome-fragment | NA    | 0     |
| 58_extracted_k141_125596  | 4625  | No  | NA    | 0  | 2 | Not-determined | Genome-fragment | NA    | 0     |
| 58_extracted_k141_195016  | 1311  | No  | NA    | 0  | 1 | Not-determined | Genome-fragment | NA    | 0     |
| 58_extracted_k141_133941  | 1557  | No  | NA    | 0  | 0 | Not-determined | Genome-fragment | NA    | 0     |
| 58_extracted_k141_64469   | 1897  | No  | NA    | 0  | 1 | Not-determined | Genome-fragment | NA    | 0     |
| 58_extracted_k141_40956   | 1043  | No  | NA    | 0  | 0 | Not-determined | Genome-fragment | NA    | 0     |
| 516_vs_15581  full        | 8410  | No  | NA    | 0  | 0 | Low-quality    | Genome-fragment | 19.56 | 0     |
| 58_extracted_k141_4051    | 3063  | No  | NA    | 0  | 3 | Not-determined | Genome-fragment | NA    | 0     |
| 58_extracted_k141_38634   | 1231  | No  | NA    | 0  | 3 | Not-determined | Genome-fragment | NA    | 0     |
| 53_vs_k141_118813  full   | 8412  | No  | NA    | 0  | 2 | Low-quality    | Genome-fragment | 5.64  | 0     |
| 58_extracted_k141_21316   | 1272  | No  | NA    | 0  | 1 | Not-determined | Genome-fragment | NA    | 0     |
| 58_extracted_k141_125612  | 3188  | No  | NA    | 0  | 1 | Not-determined | Genome-fragment | NA    | 0     |
| 58_extracted_k141_90427   | 2827  | No  | NA    | 0  | 1 | Not-determined | Genome-fragment | NA    | 0     |
| 58_extracted_k141_125620  | 3399  | No  | NA    | 0  | 2 | Not-determined | Genome-fragment | NA    | 0     |
| 58_extracted_k141_177551  | 1136  | No  | NA    | 0  | 0 | Not-determined | Genome-fragment | NA    | 0     |
| 58_extracted_k141_151228  | 1000  | No  | NA    | 0  | 0 | Not-determined | Genome-fragment | NA    | 0     |
| 58_extracted_k141_12212   | 39177 | Yes | 30236 | 13 | 6 | Medium-quality | Genome-fragment | 81.54 | 22.82 |
| 516_vs_144728  full       | 8418  | No  | NA    | 2  | 0 | Low-quality    | Genome-fragment | 23.43 | 0     |
| 58_extracted_k141_40998   | 2930  | No  | NA    | 0  | 0 | Not-determined | Genome-fragment | NA    | 0     |
| 58_extracted_k141_12220   | 1766  | No  | NA    | 0  | 2 | Not-determined | Genome-fragment | NA    | 0     |
| 58_extracted_k141_203197  | 1261  | No  | NA    | 0  | 1 | Not-determined | Genome-fragment | NA    | 0     |
| 57_vs_15071  full         | 8422  | No  | NA    | 1  | 2 | Low-quality    | Genome-fragment | 5.45  | 0     |
| 58_extracted_k141_195032  | 20853 | No  | NA    | 0  | 0 | Medium-quality | Genome-fragment | 63.24 | 0     |
| 510_vs_120576  full       | 8424  | No  | NA    | 1  | 0 | Low-quality    | Genome-fragment | 15.08 | 0     |
| 58_extracted_k141_133979  | 4596  | No  | NA    | 0  | 2 | Not-determined | Genome-fragment | NA    | 0     |
| 511_extracted_k141_16404  | 8429  | No  | NA    | 0  | 0 | Low-quality    | Genome-fragment | 15.38 | 0     |
| 58_extracted_k141_159919  | 4720  | No  | NA    | 0  | 2 | Not-determined | Genome-fragment | NA    | 0     |
| 58_vs_k141_74454  full    | 8430  | No  | NA    | 8  | 0 | Low-quality    | Genome-fragment | 24.53 | 0     |
| 58_extracted_k141_121258  | 1387  | No  | NA    | 0  | 1 | Not-determined | Genome-fragment | NA    | 0     |
| 53_extracted_k141_72813   | 8442  | No  | NA    | 0  | 0 | Low-quality    | Genome-fragment | 5.78  | 0     |
| 513_extracted_104210      | 8447  | No  | NA    | 0  | 6 | Low-quality    | Genome-fragment | 3.91  | 0     |
| 58_extracted_k141_90847   | 3095  | No  | NA    | 0  | 2 | Not-determined | Genome-fragment | NA    | 0     |
| 58_extracted_k141_201980  | 8447  | No  | NA    | 0  | 0 | Low-quality    | Genome-fragment | 20.28 | 0     |
| 58_vs_k141_192537  full   | 8447  | No  | NA    | 0  | 7 | Low-quality    | Genome-fragment | 2.37  | 0     |
| 58_extracted_k141_99500   | 1180  | No  | NA    | 0  | 2 | Not-determined | Genome-fragment | NA    | 0     |
| 58_extracted_k141_177617  | 4758  | No  | NA    | 0  | 2 | Not-determined | Genome-fragment | NA    | 0     |
| 517_vs_k141_55059  full   | 8455  | No  | NA    | 0  | 1 | Low-quality    | Genome-fragment | 8.61  | 0     |
| 58_extracted_k141_30486   | 1116  | No  | NA    | 0  | 2 | Not-determined | Genome-fragment | NA    | 0     |
| 58_extracted_k141_12303   | 2084  | No  | NA    | 0  | 1 | Not-determined | Genome-fragment | NA    | 0     |
| 58_extracted_k141_134016  | 1066  | No  | NA    | 0  | 0 | Not-determined | Genome-fragment | NA    | 0     |
| 514_extracted_k141_33985  | 8456  | No  | NA    | 4  | 0 | Low-quality    | Genome-fragment | 21.84 | 0     |
| 58_extracted_k141_168832  | 14662 | No  | NA    | 0  | 7 | Not-determined | Genome-fragment | NA    | 0     |
| 58_extracted_k141_195080  | 8458  | No  | NA    | 0  | 1 | Not-determined | Genome-fragment | NA    | 0     |
| 58_extracted_k141_203252  | 1120  | No  | NA    | 0  | 1 | Not-determined | Genome-fragment | NA    | 0     |
| 58_extracted_k141_21419   | 1537  | No  | NA    | 0  | 1 | Not-determined | Genome-fragment | NA    | 0     |
| 58_extracted_k141_30511   | 1096  | No  | NA    | 0  | 1 | Not-determined | Genome-fragment | NA    | 0     |
| 58_extracted_k141_12337   | 1001  | No  | NA    | 0  | 1 | Not-determined | Genome-fragment | NA    | 0     |
| 58_extracted_k141_47058   | 2781  | No  | NA    | 0  | 1 | Not-determined | Genome-fragment | NA    | 0     |
| 58_extracted_k141_125696  | 1024  | No  | NA    | 0  | 0 | Not-determined | Genome-fragment | NA    | 0     |
| 58_extracted_k141_80058   | 1456  | No  | NA    | 0  | 0 | Not-determined | Genome-fragment | NA    | 0     |
| 58_extracted_k141_168869  | 1118  | No  | NA    | 0  | 1 | Not-determined | Genome-fragment | NA    | 0     |
| 58_extracted_k141_177662  | 1177  | No  | NA    | 0  | 0 | Not-determined | Genome-fragment | NA    | 0     |
| 58_extracted_k141_134054  | 1180  | No  | NA    | 0  | 1 | Not-determined | Genome-fragment | NA    | 0     |
| 58_extracted_k141_12368   | 1405  | No  | NA    | 0  | 0 | Not-determined | Genome-fragment | NA    | 0     |
| 58_extracted_k141_99558   | 1188  | No  | NA    | 0  | 0 | Not-determined | Genome-fragment | NA    | 0     |
| 58_extracted_k141_134060  | 1014  | No  | NA    | 0  | 1 | Not-determined | Genome-fragment | NA    | 0     |
| 58_extracted_k141_38768   | 1006  | No  | NA    | 0  | 0 | Not-determined | Genome-fragment | NA    | 0     |
| 58_extracted_k141_116689  | 1239  | No  | NA    | 0  | 1 | Not-determined | Genome-fragment | NA    | 0     |
| 510_vs_108838  full       | 8460  | No  | NA    | 3  | 1 | Low-quality    | Genome-fragment | 20.84 | 0     |
| 58_extracted_k141_151355  | 5025  | No  | NA    | 0  | 0 | Not-determined | Genome-fragment | NA    | 0     |
| 58_extracted_k141_21445   | 1732  | No  | NA    | 0  | 2 | Not-determined | Genome-fragment | NA    | 0     |
| 58_extracted_k141_116690  | 5273  | No  | NA    | 0  | 3 | Not-determined | Genome-fragment | NA    | 0     |
| 58_extracted_k141_116693  | 2774  | No  | NA    | 0  | 0 | Not-determined | Genome-fragment | NA    | 0     |
| 513_extracted_19481       | 8467  | No  | NA    | 1  | 2 | Low-quality    | Genome-fragment | 7.95  | 0     |
| 58_extracted_k141_134082  | 1287  | No  | NA    | 0  | 0 | Not-determined | Genome-fragment | NA    | 0     |
| 58_extracted_k141_168901  | 1235  | No  | NA    | 0  | 1 | Not-determined | Genome-fragment | NA    | 0     |
| 59_extracted_k141_90853   | 8472  | No  | NA    | 4  | 0 | Low-quality    | Genome-fragment | 16.74 | 0     |
| 58_extracted_k141_30557   | 1214  | No  | NA    | 0  | 0 | Not-determined | Genome-fragment | NA    | 0     |
| 59_vs_k141_20991  full    | 8472  | No  | NA    | 5  | 0 | Low-quality    | Genome-fragment | 24.21 | 0     |
| 58_extracted_k141_4131    | 1603  | No  | NA    | 0  | 0 | Low-quality    | Genome-fragment | NA    | 0     |
| 512_extracted_k141_10434  | 8480  | No  | NA    | 1  | 2 | Low-quality    | Genome-fragment | 4.6   | 0     |
| 58_extracted_k141_13041   | 8482  | No  | NA    | 6  | 0 | Low-quality    | Genome-fragment | 20.42 | 0     |
| 58_extracted_k141_147488  | 4012  | No  | NA    | 0  | 2 | Not-determined | Genome-fragment | NA    | 0     |
| 58_extracted_k141_108357  | 16136 | No  | NA    | 0  | 6 | Not-determined | Genome-fragment | NA    | 0     |
| 58_extracted_k141_12437   | 1619  | No  | NA    | 0  | 0 | Not-determined | Genome-fragment | NA    | 0     |
| 58_extracted_k141_195149  | 4962  | No  | NA    | 0  | 1 | Not-determined | Genome-fragment | NA    | 0     |
| 58_extracted_k141_21483   | 2007  | No  | NA    | 0  | 1 | Not-determined | Genome-fragment | NA    | 0     |
| 58_extracted_k141_163736  | 2746  | No  | NA    | 0  | 2 | Not-determined | Genome-fragment | NA    | 0     |
| 58_extracted_k141_90991   | 1073  | No  | NA    | 0  | 0 | Not-determined | Genome-fragment | NA    | 0     |
| 58_extracted_k141_143003  | 4017  | No  | NA    | 0  | 2 | Not-determined | Genome-fragment | NA    | 0     |
| 58_extracted_k141_56301   | 1175  | No  | NA    | 0  | 0 | Not-determined | Genome-fragment | NA    | 0     |
| 58_extracted_k141_160013  | 1637  | No  | NA    | 0  | 1 | Not-determined | Genome-fragment | NA    | 0     |
| 58_extracted_k141_143014  | 1581  | No  | NA    | 0  | 0 | Not-determined | Genome-fragment | NA    | 0     |
| 58_extracted_k141_160018  | 1989  | No  | NA    | 0  | 0 | Not-determined | Genome-fragment | NA    | 0     |
| 58_extracted_k141_73048   | 1398  | No  | NA    | 0  | 1 | Not-determined | Genome-fragment | NA    | 0     |
| 58_extracted_k141_21505   | 2834  | No  | NA    | 0  | 0 | Not-determined | Genome-fragment | NA    | 0     |
| 58_extracted_k141_160019  | 1129  | No  | NA    | 0  | 1 | Not-determined | Genome-fragment | NA    | 0     |
| 512_vs_k141_138721  full  | 8483  | No  | NA    | 0  | 5 | Low-quality    | Genome-fragment | 9.04  | 0     |
| 58_extracted_k141_12477   | 4221  | No  | NA    | 0  | 0 | Not-determined | Genome-fragment | NA    | 0     |
| 58_extracted_k141_143020  | 1633  | No  | NA    | 0  | 0 | Not-determined | Genome-fragment | NA    | 0     |
| 516_vs_155321  full       | 8488  | No  | NA    | 1  | 2 | Low-quality    | Genome-fragment | 10.82 | 0     |
| 58_extracted_k141_21517   | 3975  | No  | NA    | 0  | 3 | Not-determined | Genome-fragment | NA    | 0     |
| 58_extracted_k141_151384  | 15637 | No  | NA    | 22 | 0 | High-quality   | Genome-fragment | 100   | 0     |
| 58_extracted_k141_21518   | 1468  | No  | NA    | 0  | 1 | Not-determined | Genome-fragment | NA    | 0     |
| 58_extracted_k141_56341   | 1651  | No  |       |    |   |                |                 |       |       |



|                           |      |     |      |    |   |                |                 |    |       |
|---------------------------|------|-----|------|----|---|----------------|-----------------|----|-------|
| 58_extracted_k141_99667   | 8281 | No  | NA   | 0  | 3 | Not-determined | Genome-fragment | NA | 0     |
| 58_extracted_k141_82225   | 1117 | No  | NA   | 0  | 1 | Not-determined | Genome-fragment | NA | 0     |
| 58_extracted_k141_177843  | 4297 | No  | NA   | 0  | 0 | Not-determined | Genome-fragment | NA | 0     |
| 58_extracted_k141_73146   | 3268 | No  | NA   | 0  | 0 | Not-determined | Genome-fragment | NA | 0     |
| 58_extracted_k141_99671   | 2162 | No  | NA   | 0  | 0 | Not-determined | Genome-fragment | NA | 0     |
| 58_extracted_k141_38878   | 5798 | No  | NA   | 0  | 6 | Not-determined | Genome-fragment | NA | 0     |
| 516_vs_9248  full         | 8546 | No  | NA   | 1  | 4 | Low-quality    | Genome-fragment | NA | 12.06 |
| 58_extracted_k141_99694   | 2730 | No  | NA   | 0  | 2 | Not-determined | Genome-fragment | NA | 0     |
| 53_vs_k141_8543  full     | 8552 | No  | NA   | 0  | 0 | Low-quality    | Genome-fragment | NA | 5.03  |
| 517_vs_k141_95172  full   | 8553 | Yes | 4898 | 1  | 1 | Low-quality    | Genome-fragment | NA | 11.13 |
| 58_extracted_k141_143126  | 1183 | No  | NA   | 0  | 0 | Not-determined | Genome-fragment | NA | 0     |
| 58_extracted_k141_195296  | 1423 | No  | NA   | 0  | 0 | Not-determined | Genome-fragment | NA | 0     |
| 58_extracted_k141_169046  | 1780 | No  | NA   | 0  | 2 | Not-determined | Genome-fragment | NA | 0     |
| 58_extracted_k141_21629   | 1919 | No  | NA   | 0  | 0 | Not-determined | Genome-fragment | NA | 0     |
| 55_extracted_k141_51127   | 8554 | No  | NA   | 9  | 0 | Low-quality    | Genome-fragment | NA | 22.19 |
| 55_vs_k141_110404  full   | 8558 | No  | NA   | 0  | 1 | Low-quality    | Genome-fragment | NA | 13.6  |
| 55_vs_k141_46638  full    | 8567 | No  | NA   | 7  | 0 | Low-quality    | Genome-fragment | NA | 22.37 |
| 513_extracted_17154       | 8569 | No  | NA   | 3  | 0 | Low-quality    | Genome-fragment | NA | 9.28  |
| 58_extracted_k141_56443   | 2752 | No  | NA   | 0  | 2 | Not-determined | Genome-fragment | NA | 0     |
| 58_extracted_k141_108532  | 1457 | No  | NA   | 0  | 0 | Not-determined | Genome-fragment | NA | 0     |
| 58_extracted_k141_82293   | 2402 | No  | NA   | 0  | 0 | Not-determined | Genome-fragment | NA | 0     |
| 58_extracted_k141_134216  | 2092 | No  | NA   | 0  | 2 | Not-determined | Genome-fragment | NA | 0     |
| 58_extracted_k141_47246   | 1121 | No  | NA   | 0  | 0 | Not-determined | Genome-fragment | NA | 0     |
| 512_extracted_k141_169826 | 8576 | No  | NA   | 3  | 0 | Low-quality    | Genome-fragment | NA | 16.68 |
| 58_extracted_k141_169059  | 1313 | No  | NA   | 0  | 1 | Not-determined | Genome-fragment | NA | 0     |
| 58_extracted_k141_108545  | 1047 | No  | NA   | 0  | 2 | Not-determined | Genome-fragment | NA | 0     |
| 58_extracted_k141_91114   | 1875 | No  | NA   | 0  | 1 | Not-determined | Genome-fragment | NA | 0     |
| 516_vs_34799  full        | 8578 | No  | NA   | 0  | 1 | Low-quality    | Genome-fragment | NA | 13.2  |
| 58_extracted_k141_82308   | 1913 | No  | NA   | 0  | 1 | Not-determined | Genome-fragment | NA | 0     |
| 58_extracted_k141_125883  | 1131 | No  | NA   | 0  | 0 | Not-determined | Genome-fragment | NA | 0     |
| 52_vs_k141_13711  full    | 8582 | No  | NA   | 2  | 0 | Low-quality    | Genome-fragment | NA | 14.3  |
| 58_extracted_k141_21653   | 3677 | No  | NA   | 0  | 1 | Not-determined | Genome-fragment | NA | 0     |
| 56_vs_k141_14991  full    | 8587 | No  | NA   | 4  | 1 | Low-quality    | Genome-fragment | NA | 25.06 |
| 58_extracted_k141_82321   | 1972 | No  | NA   | 0  | 1 | Not-determined | Genome-fragment | NA | 0     |
| 58_extracted_k141_72420   | 2085 | No  | NA   | 0  | 1 | Not-determined | Genome-fragment | NA | 0     |
| 58_extracted_k141_195344  | 2017 | No  | NA   | 0  | 1 | Not-determined | Genome-fragment | NA | 0     |
| 58_extracted_k141_64731   | 1359 | No  | NA   | 0  | 0 | Not-determined | Genome-fragment | NA | 0     |
| 58_extracted_k141_82333   | 1146 | No  | NA   | 0  | 1 | Not-determined | Genome-fragment | NA | 0     |
| 58_extracted_k141_18574   | 2370 | No  | NA   | 0  | 1 | Not-determined | Genome-fragment | NA | 0     |
| 55_vs_k141_140471  full   | 8589 | No  | NA   | 0  | 3 | Low-quality    | Genome-fragment | NA | 2.64  |
| 58_extracted_k141_125912  | 1097 | No  | NA   | 0  | 0 | Not-determined | Genome-fragment | NA | 0     |
| 58_extracted_k141_116871  | 2564 | No  | NA   | 0  | 1 | Not-determined | Genome-fragment | NA | 0     |
| 58_extracted_k141_125922  | 1026 | No  | NA   | 0  | 1 | Not-determined | Genome-fragment | NA | 0     |
| 58_extracted_k141_134285  | 2998 | No  | NA   | 0  | 2 | Not-determined | Genome-fragment | NA | 0     |
| 58_extracted_k141_169135  | 1680 | No  | NA   | 0  | 0 | Not-determined | Genome-fragment | NA | 0     |
| 58_extracted_k141_64757   | 1882 | No  | NA   | 0  | 2 | Not-determined | Genome-fragment | NA | 0     |
| 58_extracted_k141_134300  | 1991 | No  | NA   | 0  | 1 | Not-determined | Genome-fragment | NA | 0     |
| 58_extracted_k141_21691   | 2272 | No  | NA   | 0  | 2 | Not-determined | Genome-fragment | NA | 0     |
| 58_extracted_k141_12632   | 5030 | No  | NA   | 0  | 2 | Not-determined | Genome-fragment | NA | 0     |
| 516_vs_17255  full        | 8595 | No  | NA   | 0  | 2 | Low-quality    | Genome-fragment | NA | 10.26 |
| 58_extracted_k141_30618   | 1140 | No  | NA   | 0  | 2 | Not-determined | Genome-fragment | NA | 0     |
| 58_extracted_k141_72382   | 1862 | No  | NA   | 0  | 1 | Not-determined | Genome-fragment | NA | 0     |
| 58_extracted_k141_21704   | 1749 | No  | NA   | 0  | 1 | Not-determined | Genome-fragment | NA | 0     |
| 58_extracted_k141_160116  | 1875 | No  | NA   | 0  | 2 | Not-determined | Genome-fragment | NA | 0     |
| 58_extracted_k141_21708   | 1202 | No  | NA   | 0  | 1 | Not-determined | Genome-fragment | NA | 0     |
| 58_extracted_k141_116924  | 3058 | No  | NA   | 0  | 0 | Not-determined | Genome-fragment | NA | 0     |
| 59_extracted_k141_88157   | 8602 | No  | NA   | 1  | 0 | Low-quality    | Genome-fragment | NA | 4.83  |
| 58_extracted_k141_203511  | 1359 | No  | NA   | 0  | 1 | Not-determined | Genome-fragment | NA | 0     |
| 55_vs_k141_131707  full   | 8603 | No  | NA   | 0  | 0 | Low-quality    | Genome-fragment | NA | 19.78 |
| 58_extracted_k141_151587  | 3198 | No  | NA   | 0  | 0 | Not-determined | Genome-fragment | NA | 0     |
| 58_extracted_k141_160130  | 4027 | No  | NA   | 0  | 1 | Not-determined | Genome-fragment | NA | 0     |
| 59_vs_k141_30865  full    | 8612 | No  | NA   | 0  | 0 | Low-quality    | Genome-fragment | NA | 18.86 |
| 58_extracted_k141_195376  | 5643 | No  | NA   | 0  | 1 | Not-determined | Genome-fragment | NA | 0     |
| 55_vs_k141_135866  full   | 8620 | No  | NA   | 0  | 1 | Low-quality    | Genome-fragment | NA | 15.63 |
| 58_extracted_k141_143261  | 1018 | No  | NA   | 0  | 1 | Not-determined | Genome-fragment | NA | 0     |
| 53_extracted_k141_17677   | 8622 | No  | NA   | 11 | 0 | Low-quality    | Genome-fragment | NA | 21.93 |
| 58_extracted_k141_169190  | 1310 | No  | NA   | 0  | 1 | Not-determined | Genome-fragment | NA | 0     |
| 58_extracted_k141_64796   | 1610 | No  | NA   | 0  | 0 | Not-determined | Genome-fragment | NA | 0     |
| 58_extracted_k141_116955  | 5796 | No  | NA   | 0  | 1 | Not-determined | Genome-fragment | NA | 0     |
| 58_extracted_k141_47273   | 2222 | No  | NA   | 0  | 1 | Not-determined | Genome-fragment | NA | 0     |
| 511_vs_k141_88723  full   | 8623 | No  | NA   | 2  | 0 | Low-quality    | Genome-fragment | NA | 21.14 |
| 58_extracted_k141_56571   | 4804 | No  | NA   | 2  | 1 | Not-determined | Genome-fragment | NA | 0     |
| 58_extracted_k141_185792  | 5502 | No  | NA   | 0  | 3 | Not-determined | Genome-fragment | NA | 0     |
| 58_extracted_k141_203545  | 4669 | No  | NA   | 0  | 2 | Not-determined | Genome-fragment | NA | 0     |
| 58_extracted_k141_108642  | 2804 | No  | NA   | 0  | 1 | Not-determined | Genome-fragment | NA | 0     |
| 58_extracted_k141_134361  | 1563 | No  | NA   | 0  | 0 | Not-determined | Genome-fragment | NA | 0     |
| 58_extracted_k141_169207  | 4850 | No  | NA   | 0  | 2 | Not-determined | Genome-fragment | NA | 0     |
| 58_extracted_k141_47302   | 1222 | No  | NA   | 0  | 0 | Not-determined | Genome-fragment | NA | 0     |
| 58_extracted_k141_56590   | 2041 | No  | NA   | 0  | 0 | Not-determined | Genome-fragment | NA | 0     |
| 58_extracted_k141_39055   | 1743 | No  | NA   | 0  | 0 | Not-determined | Genome-fragment | NA | 0     |
| 58_extracted_k141_169236  | 1178 | No  | NA   | 0  | 0 | Not-determined | Genome-fragment | NA | 0     |
| 58_extracted_k141_117051  | 2020 | No  | NA   | 0  | 0 | Not-determined | Genome-fragment | NA | 0     |
| 58_extracted_k141_151639  | 2200 | No  | NA   | 0  | 0 | Not-determined | Genome-fragment | NA | 0     |
| 58_extracted_k141_178029  | 1223 | No  | NA   | 0  | 0 | Not-determined | Genome-fragment | NA | 0     |
| 58_extracted_k141_44564   | 3380 | No  | NA   | 0  | 1 | Not-determined | Genome-fragment | NA | 0     |
| 58_extracted_k141_56610   | 3867 | No  | NA   | 0  | 2 | Not-determined | Genome-fragment | NA | 0     |
| 58_extracted_k141_39077   | 2544 | No  | NA   | 0  | 1 | Not-determined | Genome-fragment | NA | 0     |
| 58_extracted_k141_134394  | 3081 | No  | NA   | 0  | 3 | Not-determined | Genome-fragment | NA | 0     |
| 53_vs_k141_13013  full    | 8624 | No  | NA   | 0  | 0 | Low-quality    | Genome-fragment | NA | 24.07 |
| 58_extracted_k141_64862   | 1760 | No  | NA   | 0  | 1 | Not-determined | Genome-fragment | NA | 0     |
| 55_extracted_k141_68772   | 8626 | No  | NA   | 2  | 0 | Low-quality    | Genome-fragment | NA | 19.87 |
| 58_extracted_k141_203601  | 1144 | No  | NA   | 0  | 1 | Not-determined | Genome-fragment | NA | 0     |
| 55_vs_k141_39855  full    | 8636 | No  | NA   | 4  | 0 | Low-quality    | Genome-fragment | NA | 19.85 |
| 58_extracted_k141_39089   | 2565 | No  | NA   | 0  | 0 | Not-determined | Genome-fragment | NA | 0     |
| 511_vs_k141_39021  full   | 8638 | No  | NA   | 0  | 0 | Low-quality    | Genome-fragment | NA | 19.53 |
| 514_extracted_k141_82837  | 8638 | No  | NA   | 3  | 0 | Low-quality    | Genome-fragment | NA | 5.59  |
| 58_extracted_k141_178000  | 1708 | No  | NA   | 0  | 0 | Not-determined | Genome-fragment | NA | 0     |
| 58_extracted_k141_73432   | 2279 | No  | NA   | 0  | 2 | Not-determined | Genome-fragment | NA | 0     |
| 58_extracted_k141_185816  | 2906 | No  | NA   | 0  | 2 | Not-determined | Genome-fragment | NA | 0     |
| 58_extracted_k141_151695  | 1424 | No  | NA   | 0  | 0 | Not-determined | Genome-fragment | NA | 0     |
| 58_extracted_k141_160291  | 3322 | No  | NA   | 0  | 2 | Not-determined | Genome-fragment | NA | 0     |
| 58_extracted_k141_99883   | 1896 | No  | NA   | 0  | 1 | Not-determined | Genome-fragment | NA | 0     |
| 58_extracted_k141_47385   | 2171 | No  | NA   | 0  | 0 | Not-determined | Genome-fragment | NA | 0     |
| 58_extracted_k141_160294  | 1849 | No  | NA   | 0  | 1 | Not-determined | Genome-fragment | NA | 0     |
| 53_extracted_k141_49559   | 8639 | No  | NA   | 0  | 0 | Low-quality    | Genome-fragment | NA | 15.13 |
| 58_extracted_k141_82465   | 1053 | No  | NA   | 0  | 2 | Not-determined | Genome-fragment | NA | 0     |
| 58_extracted_k141_47386   | 3026 | No  | NA   | 0  | 3 | Not-determined | Genome-fragment | NA | 0     |
| 58_extracted_k141_73455   | 2009 | No  | NA   | 0  | 2 | Not-determined | Genome-fragment | NA | 0     |
| 58_extracted_k141_13785   | 2527 | No  | NA   | 0  | 1 | Not-determined | Genome-fragment | NA | 0     |
| 58_extracted_k141_178081  | 1282 | No  | NA   | 0  | 0 | Not-determined | Genome-fragment | NA | 0     |
| 51_vs_k141_44354  full    | 8646 | No  | NA   | 4  | 0 | Low-quality    | Genome-fragment | NA | 19.65 |
| 58_extracted_k141_117085  | 1341 | No  | NA   | 0  | 0 | Not-determined | Genome-fragment | NA | 0     |
| 58_extracted_k141_73463   | 1036 | No  | NA   | 0  | 0 | Not-determined | Genome-fragment | NA | 0     |
| 58_extracted_k141_203657  | 1032 | No  | NA   | 0  | 0 | Not-determined | Genome-fragment | NA | 0     |
| 52_vs_k141_11615  full    | 8655 | No  | NA   | 0  | 2 | Low-quality    | Genome-fragment | NA | 20.21 |
| 59_vs_k141_36131  full    | 8661 | No  | NA   | 3  | 0 | Low-quality    | Genome-fragment | NA | 19.69 |
| 58_extracted_k141_30803   | 4897 | No  | NA   | 0  | 2 | Not-determined | Genome-fragment | NA | 0     |
| 58_extracted_k141_64914   | 3514 | No  | NA   | 0  | 1 | Not-determined | Genome-fragment | NA | 0     |
| 58_extracted_k141_47404   | 1257 | No  | NA   | 0  | 0 | Not-determined | Genome-fragment | NA | 0     |
| 58_extracted_k141_178087  | 3404 | No  | NA   | 0  | 1 | Not-determined | Genome-fragment | NA | 0     |
| 511_vs_k141_60870  full   | 8662 | No  | NA   | 0  | 0 | Low-quality    | Genome-fragment | NA | 3.57  |
| 58_extracted_k141_195518  | 5951 | No  | NA   | 0  | 0 | Not-determined | Genome-fragment | NA | 0     |
| 58_extracted_k141_195520  | 1517 | No  | NA   | 0  | 0 | Not-determined | Genome-fragment | NA | 0     |
| 58_extracted_k141_185847  | 5809 | No  | NA   | 0  | 2 | Not-determined | Genome-fragment | NA | 0     |
| 58_extracted_k141_45654   | 1056 | No  | NA   | 0  | 2 | Not-determined | Genome-fragment | NA | 0     |
| 58_extracted_k141_56673   | 1169 | No  | NA   | 0  | 1 | Not-determined | Genome-fragment | NA | 0     |
| 58_extracted_k141_47414   | 4291 | No  | NA   | 0  | 3 | Not-determined | Genome-fragment | NA | 0     |
| 57_extracted_11308        | 8667 | No  | NA   | 0  | 0 | Low-quality    | Genome-fragment | NA | 21.62 |
| 58_extracted_k141_151775  | 1454 | No  | NA   | 0  | 1 | Not-determined | Genome-fragment | NA | 0     |
| 58_extracted_k141_82531   | 1985 | No  | NA   | 0  | 1 | Not-determined | Genome-fragment | NA | 0     |
| 58_extracted_k141_91206   | 1421 | No  | NA   | 0  | 0 | Not-determined | Genome-fragment | NA | 0     |
| 58_extracted_k141_203713  | 1524 | No  | NA   | 0  | 0 | Not-determined | Genome-fragment | NA | 0     |
| 58_extracted_k141_143361  | 1248 | No  | NA   | 0  | 2 | Not-determined | Genome-fragment | NA | 0     |
| 58_extracted_k141_39182   | 1104 | No  | NA   | 0  | 1 | Not-determined | Genome-fragment | NA | 0     |
| 511_vs_k141_59445  full   | 8668 | No  | NA   | 0  | 1 | Low-quality    | Genome-fragment | NA | 5.59  |
| 58_extracted_k141_30845   | 3375 | No  | NA   | 0  | 3 | Not-determined | Genome-fragment | NA | 0     |
| 58_extracted_k141_151809  | 1578 | No  | NA   | 0  | 1 | Not-determined | Genome-fragment | NA | 0     |
| 58_extracted_k141_134466  | 1903 | No  | NA   | 0  | 2 | Not-determined | Genome-fragment | NA | 0     |
| 58_extracted_k141_169389  | 1029 | No  | NA   | 0  | 0 | Not-determined | Genome-fragment | NA | 0     |
| 51_extracted_k141_12730   | 8668 | No  | NA   | 3  | 0 | Low-quality    | Genome-fragment | NA | 14.83 |
| 58_extracted_k141_21959   | 1566 | No  | NA   | 0  | 0 | Not-determined | Genome-fragment | NA | 0     |
| 58_extracted_k141_91252   | 2475 | No  | NA   | 0  | 1 | Not-determined | Genome-fragment | NA | 0     |
| 58_extracted_k141_21963   | 1244 | No  | NA   | 0  | 0 | Not-determined | Genome-fragment | NA | 0     |
| 58_extracted_k141_203736  | 1759 | No  | NA   |    |   |                |                 |    |       |



|                           |       |     |    |    |   |                |                 |       |       |
|---------------------------|-------|-----|----|----|---|----------------|-----------------|-------|-------|
| 58_extracted_k141_143458  | 2238  | No  | NA | 0  | 2 | Not-determined | Genome-fragment | NA    | 0     |
| 58_extracted_k141_203831  | 1125  | No  | NA | 0  | 0 | Not-determined | Genome-fragment | NA    | 0     |
| 58_extracted_k141_126134  | 1444  | No  | NA | 0  | 0 | Not-determined | Genome-fragment | NA    | 0     |
| 58_extracted_k141_143463  | 1048  | No  | NA | 0  | 0 | Not-determined | Genome-fragment | NA    | 0     |
| 58_extracted_k141_186013  | 1248  | No  | NA | 0  | 0 | Not-determined | Genome-fragment | NA    | 0     |
| 58_extracted_k141_156143  | 1036  | No  | NA | 0  | 0 | Not-determined | Genome-fragment | NA    | 0     |
| 58_extracted_k141_100069  | 1136  | No  | NA | 0  | 0 | Not-determined | Genome-fragment | NA    | 0     |
| 58_extracted_k141_82611   | 1937  | No  | NA | 0  | 1 | Not-determined | Genome-fragment | NA    | 0     |
| 58_extracted_k141_22077   | 1089  | No  | NA | 0  | 1 | Not-determined | Genome-fragment | NA    | 0     |
| 58_extracted_k141_117302  | 1346  | No  | NA | 0  | 1 | Not-determined | Genome-fragment | NA    | 0     |
| 58_extracted_k141_178280  | 1019  | No  | NA | 0  | 0 | Not-determined | Genome-fragment | NA    | 0     |
| 58_extracted_k141_85621   | 1213  | No  | NA | 0  | 0 | Not-determined | Genome-fragment | NA    | 0     |
| 58_extracted_k141_186042  | 1451  | No  | NA | 0  | 2 | Not-determined | Genome-fragment | NA    | 0     |
| 58_extracted_k141_22094   | 2113  | No  | NA | 0  | 1 | Not-determined | Genome-fragment | NA    | 0     |
| 58_extracted_k141_117329  | 1241  | No  | NA | 0  | 0 | Not-determined | Genome-fragment | NA    | 0     |
| 58_extracted_k141_151591  | 1483  | No  | NA | 0  | 1 | Not-determined | Genome-fragment | NA    | 0     |
| 58_extracted_k141_56831   | 9192  | No  | NA | 0  | 4 | Not-determined | Genome-fragment | NA    | 0     |
| 513_vs_55924  full        | 8688  | No  | NA | 0  | 4 | Low-quality    | Genome-fragment | 5.59  | 0     |
| 58_extracted_k141_151915  | 2269  | No  | NA | 0  | 2 | Not-determined | Genome-fragment | NA    | 0     |
| 58_extracted_k141_134590  | 1705  | No  | NA | 0  | 1 | Not-determined | Genome-fragment | NA    | 0     |
| 58_extracted_k141_160390  | 2110  | No  | NA | 0  | 0 | Not-determined | Genome-fragment | NA    | 0     |
| 58_extracted_k141_143528  | 1324  | No  | NA | 0  | 0 | Not-determined | Genome-fragment | NA    | 0     |
| 58_extracted_k141_169502  | 3933  | No  | NA | 0  | 4 | Not-determined | Genome-fragment | NA    | 0     |
| 58_extracted_k141_39330   | 3860  | No  | NA | 0  | 2 | Not-determined | Genome-fragment | NA    | 0     |
| 58_extracted_k141_143534  | 4823  | No  | NA | 0  | 3 | Not-determined | Genome-fragment | NA    | 0     |
| 58_extracted_k141_30980   | 15953 | No  | NA | 0  | 5 | Not-determined | Genome-fragment | NA    | 0     |
| 55_extracted_k141_62615   | 8691  | No  | NA | 5  | 0 | Low-quality    | Genome-fragment | 22.16 | 0     |
| 512_vs_k141_152341  full  | 8695  | No  | NA | 2  | 0 | Low-quality    | Genome-fragment | 19.71 | 0     |
| 58_extracted_k141_134605  | 1736  | No  | NA | 1  | 1 | Not-determined | Genome-fragment | NA    | 0     |
| 58_extracted_k141_91420   | 2996  | No  | NA | 0  | 1 | Not-determined | Genome-fragment | NA    | 0     |
| 58_extracted_k141_126159  | 4389  | No  | NA | 0  | 1 | Not-determined | Genome-fragment | NA    | 0     |
| 58_extracted_k141_160417  | 1416  | No  | NA | 0  | 1 | Not-determined | Genome-fragment | NA    | 0     |
| 58_extracted_k141_91431   | 2334  | No  | NA | 0  | 3 | Not-determined | Genome-fragment | NA    | 0     |
| 58_extracted_k141_151976  | 1028  | No  | NA | 0  | 1 | Not-determined | Genome-fragment | NA    | 0     |
| 58_extracted_k141_160419  | 3315  | No  | NA | 0  | 2 | Not-determined | Genome-fragment | NA    | 0     |
| 53_extracted_k141_31320   | 8697  | No  | NA | 0  | 1 | Low-quality    | Genome-fragment | 7.95  | 0     |
| 58_extracted_k141_126215  | 1018  | No  | NA | 0  | 0 | Not-determined | Genome-fragment | NA    | 0     |
| 58_extracted_k141_134631  | 2501  | No  | NA | 0  | 1 | Not-determined | Genome-fragment | NA    | 0     |
| 58_extracted_k141_130031  | 1800  | No  | NA | 0  | 1 | Not-determined | Genome-fragment | NA    | 0     |
| 58_extracted_k141_31019   | 1118  | No  | NA | 0  | 1 | Not-determined | Genome-fragment | NA    | 0     |
| 58_extracted_k141_151997  | 1033  | No  | NA | 0  | 0 | Not-determined | Genome-fragment | NA    | 0     |
| 58_extracted_k141_178345  | 7652  | No  | NA | 0  | 2 | Not-determined | Genome-fragment | NA    | 0     |
| 58_extracted_k141_91438   | 11225 | No  | NA | 0  | 0 | Not-determined | Genome-fragment | NA    | 0     |
| 514_extracted_k141_62252  | 8703  | No  | NA | 21 | 0 | Low-quality    | Genome-fragment | 28.66 | 0     |
| 58_extracted_k141_169547  | 1173  | No  | NA | 0  | 0 | Not-determined | Genome-fragment | NA    | 0     |
| 58_extracted_k141_169548  | 1317  | No  | NA | 0  | 1 | Not-determined | Genome-fragment | NA    | 0     |
| 58_extracted_k141_22220   | 3882  | No  | NA | 0  | 8 | Not-determined | Genome-fragment | NA    | 0     |
| 58_extracted_k141_100172  | 2134  | No  | NA | 0  | 2 | Not-determined | Genome-fragment | NA    | 0     |
| 58_extracted_k141_169561  | 3180  | No  | NA | 0  | 2 | Not-determined | Genome-fragment | NA    | 0     |
| 511_vs_k141_104050  full  | 8709  | No  | NA | 1  | 0 | Low-quality    | Genome-fragment | 22.14 | 0     |
| 58_extracted_k141_22221   | 2748  | No  | NA | 0  | 2 | Not-determined | Genome-fragment | NA    | 0     |
| 58_extracted_k141_169562  | 1524  | No  | NA | 0  | 0 | Not-determined | Genome-fragment | NA    | 0     |
| 58_extracted_k141_195757  | 1557  | No  | NA | 0  | 1 | Not-determined | Genome-fragment | NA    | 0     |
| 517_vs_k141_190  full     | 8714  | No  | NA | 0  | 0 | Low-quality    | Genome-fragment | 20.35 | 0     |
| 58_extracted_k141_178376  | 2583  | No  | NA | 0  | 0 | Not-determined | Genome-fragment | NA    | 0     |
| 58_extracted_k141_169576  | 1557  | No  | NA | 0  | 3 | Not-determined | Genome-fragment | NA    | 0     |
| 53_vs_k141_49  full       | 8730  | No  | NA | 0  | 1 | Low-quality    | Genome-fragment | 13.02 | 0     |
| 57_extracted_128477       | 8730  | No  | NA | 6  | 0 | Low-quality    | Genome-fragment | 22.69 | 0     |
| 58_extracted_k141_65218   | 2158  | No  | NA | 3  | 1 | Not-determined | Genome-fragment | NA    | 0     |
| 58_extracted_k141_31078   | 1850  | No  | NA | 0  | 0 | Not-determined | Genome-fragment | NA    | 0     |
| 58_extracted_k141_56917   | 6946  | No  | NA | 0  | 4 | Not-determined | Genome-fragment | NA    | 0     |
| 58_extracted_k141_73708   | 1968  | No  | NA | 0  | 0 | Not-determined | Genome-fragment | NA    | 0     |
| 58_extracted_k141_186099  | 3044  | No  | NA | 0  | 2 | Not-determined | Genome-fragment | NA    | 0     |
| 517_vs_k141_76458  full   | 8732  | No  | NA | 1  | 1 | Low-quality    | Genome-fragment | 19.96 | 0     |
| 55_vs_k141_5921  full     | 8735  | No  | NA | 2  | 2 | Low-quality    | Genome-fragment | 1.82  | 60.7  |
| 58_extracted_k141_203993  | 1843  | No  | NA | 0  | 1 | Not-determined | Genome-fragment | NA    | 0     |
| 58_extracted_k141_56930   | 1031  | No  | NA | 0  | 1 | Not-determined | Genome-fragment | NA    | 0     |
| 58_extracted_k141_203995  | 2426  | No  | NA | 0  | 1 | Not-determined | Genome-fragment | NA    | 0     |
| 58_extracted_k141_134705  | 2417  | No  | NA | 0  | 0 | Not-determined | Genome-fragment | NA    | 0     |
| 58_extracted_k141_169605  | 1309  | No  | NA | 0  | 1 | Not-determined | Genome-fragment | NA    | 0     |
| 512_vs_k141_92184  full   | 8736  | No  | NA | 0  | 5 | Low-quality    | Genome-fragment | 4.51  | 0     |
| 58_extracted_k141_131076  | 1146  | No  | NA | 0  | 0 | Not-determined | Genome-fragment | NA    | 0     |
| 58_extracted_k141_56934   | 3294  | No  | NA | 0  | 2 | Not-determined | Genome-fragment | NA    | 0     |
| 58_extracted_k141_152072  | 5203  | No  | NA | 0  | 2 | Not-determined | Genome-fragment | NA    | 0     |
| 58_extracted_k141_4665    | 5369  | No  | NA | 0  | 1 | Not-determined | Genome-fragment | NA    | 0     |
| 58_extracted_k141_31104   | 1428  | No  | NA | 0  | 0 | Not-determined | Genome-fragment | NA    | 0     |
| 58_extracted_k141_22222   | 3952  | No  | NA | 0  | 1 | Not-determined | Genome-fragment | NA    | 0     |
| 58_extracted_k141_31106   | 1159  | No  | NA | 0  | 0 | Not-determined | Genome-fragment | NA    | 0     |
| 58_extracted_k141_11744   | 3681  | No  | NA | 0  | 2 | Not-determined | Genome-fragment | NA    | 0     |
| 58_extracted_k141_117451  | 1005  | No  | NA | 0  | 0 | Not-determined | Genome-fragment | NA    | 0     |
| 55_vs_k141_141538  full   | 8740  | No  | NA | 4  | 0 | Low-quality    | Genome-fragment | 20.34 | 0     |
| 51_vs_k141_133058  full   | 8744  | No  | NA | 0  | 1 | Low-quality    | Genome-fragment | 6.04  | 0     |
| 58_extracted_k141_4675    | 1814  | No  | NA | 0  | 2 | Not-determined | Genome-fragment | NA    | 0     |
| 57_vs_19100  full         | 8747  | No  | NA | 3  | 0 | Low-quality    | Genome-fragment | 28.57 | 0     |
| 58_extracted_k141_31123   | 1611  | No  | NA | 1  | 2 | Not-determined | Genome-fragment | NA    | 0     |
| 58_extracted_k141_4689    | 1215  | No  | NA | 0  | 0 | Not-determined | Genome-fragment | NA    | 0     |
| 58_extracted_k141_47759   | 1034  | No  | NA | 0  | 0 | Not-determined | Genome-fragment | NA    | 0     |
| 59_vs_k141_640  full      | 8751  | No  | NA | 3  | 1 | Low-quality    | Genome-fragment | 15.04 | 0     |
| 58_extracted_k141_204080  | 4467  | No  | NA | 0  | 2 | Not-determined | Genome-fragment | NA    | 0     |
| 58_extracted_k141_56981   | 1269  | No  | NA | 0  | 2 | Not-determined | Genome-fragment | NA    | 0     |
| 58_extracted_k141_22334   | 9009  | No  | NA | 0  | 3 | Not-determined | Genome-fragment | NA    | 0     |
| 58_extracted_k141_117495  | 1050  | No  | NA | 0  | 0 | Not-determined | Genome-fragment | NA    | 0     |
| 58_extracted_k141_39447   | 3452  | No  | NA | 0  | 1 | Not-determined | Genome-fragment | NA    | 0     |
| 58_extracted_k141_117496  | 2320  | No  | NA | 0  | 0 | Not-determined | Genome-fragment | NA    | 0     |
| 57_extracted_123395       | 8760  | No  | NA | 1  | 1 | Low-quality    | Genome-fragment | 5.93  | 0     |
| 513_vs_131409  full       | 8764  | No  | NA | 2  | 0 | Low-quality    | Genome-fragment | 15.04 | 0     |
| 516_extracted_108860      | 8767  | No  | NA | 6  | 0 | Low-quality    | Genome-fragment | 15.11 | 0     |
| 58_extracted_k141_158517  | 1789  | No  | NA | 0  | 1 | Not-determined | Genome-fragment | NA    | 0     |
| 517_vs_k141_51131  full   | 8769  | No  | NA | 0  | 0 | Low-quality    | Genome-fragment | 12.94 | 0     |
| 58_extracted_k141_143715  | 2086  | No  | NA | 0  | 0 | Not-determined | Genome-fragment | NA    | 0     |
| 58_extracted_k141_47804   | 1242  | No  | NA | 0  | 0 | Not-determined | Genome-fragment | NA    | 0     |
| 58_extracted_k141_73841   | 1075  | No  | NA | 0  | 1 | Not-determined | Genome-fragment | NA    | 0     |
| 58_extracted_k141_109004  | 4152  | No  | NA | 0  | 1 | Not-determined | Genome-fragment | NA    | 0     |
| 55_vs_k141_121005  full   | 8773  | No  | NA | 3  | 1 | Low-quality    | Genome-fragment | 18.2  | 0     |
| 58_extracted_k141_82752   | 1811  | No  | NA | 0  | 1 | Not-determined | Genome-fragment | NA    | 0     |
| 58_extracted_k141_143741  | 2477  | No  | NA | 0  | 1 | Not-determined | Genome-fragment | NA    | 0     |
| 58_extracted_k141_169662  | 1265  | No  | NA | 0  | 0 | Not-determined | Genome-fragment | NA    | 0     |
| 512_vs_k141_69133  full   | 8775  | No  | NA | 0  | 3 | Low-quality    | Genome-fragment | 5.17  | 0     |
| 510_vs_65523  full        | 8778  | No  | NA | 0  | 2 | Low-quality    | Genome-fragment | 9.57  | 0     |
| 516_extracted_43246       | 8794  | No  | NA | 12 | 0 | Low-quality    | Genome-fragment | 19.65 | 0     |
| 58_extracted_k141_20897   | 8797  | No  | NA | 2  | 0 | Low-quality    | Genome-fragment | 22.27 | 0     |
| 58_extracted_k141_47836   | 1587  | No  | NA | 0  | 0 | Not-determined | Genome-fragment | NA    | 0     |
| 58_extracted_k141_22390   | 1496  | No  | NA | 0  | 0 | Not-determined | Genome-fragment | NA    | 0     |
| 58_extracted_k141_169679  | 1022  | No  | NA | 0  | 0 | Not-determined | Genome-fragment | NA    | 0     |
| 58_extracted_k141_100329  | 1630  | No  | NA | 0  | 2 | Not-determined | Genome-fragment | NA    | 0     |
| 58_extracted_k141_91524   | 1245  | No  | NA | 0  | 1 | Not-determined | Genome-fragment | NA    | 0     |
| 58_extracted_k141_126321  | 1798  | No  | NA | 0  | 2 | Not-determined | Genome-fragment | NA    | 0     |
| 58_extracted_k141_143768  | 2532  | No  | NA | 0  | 1 | Not-determined | Genome-fragment | NA    | 0     |
| 58_extracted_k141_158487  | 1307  | No  | NA | 0  | 0 | Not-determined | Genome-fragment | NA    | 0     |
| 58_extracted_k141_22409   | 1069  | No  | NA | 0  | 0 | Not-determined | Genome-fragment | NA    | 0     |
| 58_extracted_k141_39505   | 5953  | No  | NA | 0  | 5 | Not-determined | Genome-fragment | NA    | 0     |
| 53_extracted_k141_36390   | 8759  | No  | NA | 0  | 1 | Low-quality    | Genome-fragment | 21.79 | 0     |
| 58_extracted_k141_31215   | 6943  | No  | NA | 0  | 3 | Not-determined | Genome-fragment | NA    | 0     |
| 58_extracted_k141_178430  | 1046  | No  | NA | 0  | 2 | Not-determined | Genome-fragment | NA    | 0     |
| 58_extracted_k141_204153  | 2360  | No  | NA | 0  | 0 | Not-determined | Genome-fragment | NA    | 0     |
| 58_extracted_k141_39524   | 1047  | No  | NA | 0  | 1 | Not-determined | Genome-fragment | NA    | 0     |
| 58_extracted_k141_117606  | 1003  | No  | NA | 0  | 0 | Not-determined | Genome-fragment | NA    | 0     |
| 58_extracted_k141_133820  | 1780  | No  | NA | 0  | 0 | Not-determined | Genome-fragment | NA    | 0     |
| 58_extracted_k141_134807  | 3695  | No  | NA | 0  | 0 | Not-determined | Genome-fragment | NA    | 0     |
| 513_vs_98911  full        | 8801  | No  | NA | 0  | 7 | Low-quality    | Genome-fragment | 3.04  | 0     |
| 56_vs_k141_23858  full    | 8809  | No  | NA | 3  | 0 | Low-quality    | Genome-fragment | 16.95 | 0     |
| 58_extracted_k141_57118   | 1031  | No  | NA | 0  | 0 | Not-determined | Genome-fragment | NA    | 0     |
| 58_extracted_k141_22463   | 5809  | No  | NA | 0  | 1 | Not-determined | Genome-fragment | NA    | 0     |
| 58_extracted_k141_39553   | 1694  | No  | NA | 0  | 1 | Not-determined | Genome-fragment | NA    | 0     |
| 58_extracted_k141_65422   | 1496  | No  | NA | 0  | 0 | Not-determined | Genome-fragment | NA    | 0     |
| 58_extracted_k141_204176  | 2339  | No  | NA | 0  | 0 | Not-determined | Genome-fragment | NA    | 0     |
| 58_extracted_k141_117624  | 3693  | No  | NA | 0  | 4 | Not-determined | Genome-fragment | NA    | 0     |
| 517_extracted_k141_112931 | 8810  | Yes | NA | 3  | 2 | Low-quality    | Genome-fragment | 6.05  | 44.68 |
| 515_vs_33756  full        | 8811  | No  | NA | 0  | 7 | Low-quality    | Genome-fragment | 4.19  | 0     |
| 511_vs_k141_23228  full   | 8818  | No  | NA | 1  | 1 | Low-quality    | Genome-fragment | 8.52  | 0     |
| 58_extracted_k141_152225  | 1431  | No  | NA | 0  | 0 | Not-determined | Genome-fragment | NA    | 0     |
| 58_extracted_k141_143848  | 4656  | No  | NA | 0  | 0 | Not-determined | Genome-fragment | NA    | 0     |
| 512_extracted_k141_103204 | 8819  | No  | NA | 2  | 0 | Low-quality    | Genome-fragment | 8.08  | 0     |
| 58_extracted_k141_91618   | 1139  | No  | NA | 0  | 1 | Not-determined | Genome-fragment | NA    | 0     |
| 58_extracted_k141_186148  | 12771 | No  | NA | 0  | 1 | Not-determined | Genome-fragment | NA    | 0     |
| 58_extracted_k141_117     |       |     |    |    |   |                |                 |       |       |



|                           |       |     |    |      |                |                 |                 |                 |       |       |
|---------------------------|-------|-----|----|------|----------------|-----------------|-----------------|-----------------|-------|-------|
| 58_extracted_k141_82899   | 3389  | No  | NA | 0    | 0              | Not-determined  | Genome-fragment | NA              |       | 0     |
| 517_extracted_k141_160143 | 8864  | No  | NA | 0    | 1              | Low-quality     | Genome-fragment | NA              | 15.66 | 0     |
| 58_extracted_k141_82914   | 1311  | No  | NA | 0    | 1              | Not-determined  | Genome-fragment | NA              |       | 0     |
| 58_extracted_k141_109209  | 1280  | No  | NA | 0    | 0              | Not-determined  | Genome-fragment | NA              |       | 0     |
| 53_vs_k141_311471[full]   | 8866  | Yes |    | 7267 | 1              | 2               | Low-quality     | Genome-fragment | 5.24  | 18.04 |
| 58_extracted_k141_143978  | 1001  | No  | NA | 0    | 0              | Not-determined  | Genome-fragment | NA              |       | 0     |
| 58_extracted_k141_178594  | 4369  | No  | NA | 0    | 3              | Not-determined  | Genome-fragment | NA              |       | 0     |
| 517_vs_k141_302171[full]  | 8872  | No  | NA | 0    | 0              | Low-quality     | Genome-fragment | NA              | 12.19 | 0     |
| 58_extracted_k141_91749   | 2888  | No  | NA | 0    | 3              | Not-determined  | Genome-fragment | NA              |       | 0     |
| 58_extracted_k141_186231  | 1351  | No  | NA | 0    | 0              | Not-determined  | Genome-fragment | NA              |       | 0     |
| 58_extracted_k141_57272   | 2116  | No  | NA | 0    | 0              | 1               | Not-determined  | Genome-fragment | NA    | 0     |
| 58_extracted_k141_178603  | 1036  | No  | NA | 0    | 0              | Not-determined  | Genome-fragment | NA              |       | 0     |
| 58_extracted_k141_22567   | 4200  | No  | NA | 0    | 2              | Not-determined  | Genome-fragment | NA              |       | 0     |
| 53_vs_k141_1045071[full]  | 8883  | No  | NA | 6    | 0              | Low-quality     | Genome-fragment | NA              | 4.78  | 0     |
| 58_extracted_k141_143988  | 2543  | No  | NA | 0    | 3              | Not-determined  | Genome-fragment | NA              |       | 0     |
| 58_extracted_k141_65522   | 2893  | No  | NA | 14   | 0              | Medium-quality  | Genome-fragment | NA              | 87.82 | 0     |
| 58_extracted_k141_31398   | 1239  | No  | NA | 0    | 0              | Not-determined  | Genome-fragment | NA              |       | 0     |
| 58_vs_k141_118210[full]   | 8885  | No  | NA | 4    | 0              | Low-quality     | Genome-fragment | NA              | 21.08 | 0     |
| 58_extracted_k141_109241  | 5251  | No  | NA | 0    | 2              | Not-determined  | Genome-fragment | NA              |       | 0     |
| 58_extracted_k141_186264  | 2200  | No  | NA | 0    | 1              | Not-determined  | Genome-fragment | NA              |       | 0     |
| 55_vs_k141_9010[full]     | 8887  | No  | NA | 6    | 0              | Low-quality     | Genome-fragment | NA              | 18.82 | 0     |
| 58_extracted_k141_109247  | 1899  | No  | NA | 0    | 3              | Not-determined  | Genome-fragment | NA              |       | 0     |
| 58_extracted_k141_179846  | 8890  | No  | NA | 8    | 0              | Low-quality     | Genome-fragment | NA              | 5.61  | 0     |
| 58_extracted_k141_47950   | 3830  | No  | NA | 0    | 3              | Not-determined  | Genome-fragment | NA              |       | 0     |
| 58_extracted_k141_204315  | 1170  | No  | NA | 0    | 1              | Not-determined  | Genome-fragment | NA              |       | 0     |
| 58_extracted_k141_160687  | 1109  | No  | NA | 0    | 1              | Not-determined  | Genome-fragment | NA              |       | 0     |
| 56_vs_k141_283771[full]   | 8896  | No  | NA | 2    | 0              | Low-quality     | Genome-fragment | NA              | 22.19 | 0     |
| 58_extracted_k141_73992   | 6457  | No  | NA | 0    | 4              | Not-determined  | Genome-fragment | NA              |       | 0     |
| 58_extracted_k141_91814   | 1027  | No  | NA | 0    | 0              | Not-determined  | Genome-fragment | NA              |       | 0     |
| 58_extracted_k141_47964   | 3103  | No  | NA | 0    | 0              | Not-determined  | Genome-fragment | NA              |       | 0     |
| 58_extracted_k141_178645  | 1034  | No  | NA | 0    | 1              | Not-determined  | Genome-fragment | NA              |       | 0     |
| 58_extracted_k141_65553   | 1076  | No  | NA | 0    | 1              | Not-determined  | Genome-fragment | NA              |       | 0     |
| 514_vs_k141_35981[full]   | 8898  | No  | NA | 3    | 0              | Low-quality     | Genome-fragment | NA              | 14.91 | 0     |
| 512_vs_k141_20641[full]   | 8898  | No  | NA | 10   | 0              | Low-quality     | Genome-fragment | NA              | 24.53 | 0     |
| 58_extracted_k141_114843  | 84005 | No  | NA | 8    | 0              | High-quality    | High-quality    |                 | 100   | 0     |
| 517_vs_k141_1514901[full] | 8901  | No  | NA | 11   | 0              | Low-quality     | Genome-fragment | NA              | 26.48 | 0     |
| 58_extracted_k141_21650   | 1122  | No  | NA | 0    | 1              | Not-determined  | Genome-fragment | NA              |       | 0     |
| 58_extracted_k141_47994   | 1008  | No  | NA | 0    | 0              | Not-determined  | Genome-fragment | NA              |       | 0     |
| 58_extracted_k141_116538  | 5612  | No  | NA | 0    | 0              | Not-determined  | Genome-fragment | NA              |       | 0     |
| 58_extracted_k141_178673  | 1042  | No  | NA | 0    | 0              | Not-determined  | Genome-fragment | NA              |       | 0     |
| 58_extracted_k141_21654   | 4736  | No  | NA | 0    | 1              | Not-determined  | Genome-fragment | NA              |       | 0     |
| 58_extracted_k141_57339   | 5604  | No  | NA | 0    | 1              | Not-determined  | Genome-fragment | NA              |       | 0     |
| 58_extracted_k141_109299  | 1411  | No  | NA | 0    | 1              | Not-determined  | Genome-fragment | NA              |       | 0     |
| 58_extracted_k141_152436  | 1638  | No  | NA | 0    | 1              | Not-determined  | Genome-fragment | NA              |       | 0     |
| 58_extracted_k141_117796  | 42349 | No  | NA | 9    | 2              | High-quality    | High-quality    |                 | 98.87 | 0     |
| 58_extracted_k141_160714  | 2647  | No  | NA | 0    | 0              | Not-determined  | Genome-fragment | NA              |       | 0     |
| 58_extracted_k141_21698   | 1937  | No  | NA | 0    | 1              | Not-determined  | Genome-fragment | NA              |       | 0     |
| 58_extracted_k141_74039   | 1007  | No  | NA | 0    | 1              | Not-determined  | Genome-fragment | NA              |       | 0     |
| 58_extracted_k141_83047   | 5339  | No  | NA | 0    | 2              | Not-determined  | Genome-fragment | NA              |       | 0     |
| 58_extracted_k141_204364  | 1183  | No  | NA | 0    | 0              | Not-determined  | Genome-fragment | NA              |       | 0     |
| 58_extracted_k141_186133  | 1640  | No  | NA | 0    | 1              | Not-determined  | Genome-fragment | NA              |       | 0     |
| 58_extracted_k141_186309  | 1211  | No  | NA | 0    | 1              | Not-determined  | Genome-fragment | NA              |       | 0     |
| 58_extracted_k141_109328  | 1089  | No  | NA | 0    | 1              | Not-determined  | Genome-fragment | NA              |       | 0     |
| 58_extracted_k141_178691  | 1055  | No  | NA | 0    | 1              | Not-determined  | Genome-fragment | NA              |       | 0     |
| 58_extracted_k141_65633   | 5661  | No  | NA | 6    | Not-determined | Genome-fragment | NA              |                 | 0     |       |
| 58_extracted_k141_74063   | 1943  | No  | NA | 0    | 1              | Not-determined  | Genome-fragment | NA              |       | 0     |
| 58_extracted_k141_65635   | 3151  | No  | NA | 0    | 1              | Not-determined  | Genome-fragment | NA              |       | 0     |
| 58_extracted_k141_152494  | 1380  | No  | NA | 0    | 2              | Not-determined  | Genome-fragment | NA              |       | 0     |
| 58_vs_k141_1483611[full]  | 8903  | No  | NA | 0    | 5              | Low-quality     | Genome-fragment | NA              | 8.54  | 0     |
| 58_extracted_k141_152498  | 3103  | No  | NA | 0    | 3              | Not-determined  | Genome-fragment | NA              |       | 0     |
| 58_extracted_k141_186431  | 2735  | No  | NA | 0    | 2              | Not-determined  | Genome-fragment | NA              |       | 0     |
| 58_extracted_k141_57412   | 1729  | No  | NA | 0    | 1              | Not-determined  | Genome-fragment | NA              |       | 0     |
| 58_extracted_k141_83106   | 1065  | No  | NA | 0    | 2              | Not-determined  | Genome-fragment | NA              |       | 0     |
| 58_extracted_k141_152507  | 1460  | No  | NA | 0    | 1              | Not-determined  | Genome-fragment | NA              |       | 0     |
| 58_extracted_k141_48073   | 2123  | No  | NA | 0    | 1              | Not-determined  | Genome-fragment | NA              |       | 0     |
| 58_extracted_k141_152508  | 2065  | No  | NA | 0    | 0              | Not-determined  | Genome-fragment | NA              |       | 0     |
| 55_vs_k141_1002061[full]  | 8905  | No  | NA | 0    | 2              | Low-quality     | Genome-fragment | NA              | 4.24  | 0     |
| 58_extracted_k141_152512  | 1511  | No  | NA | 0    | 2              | Not-determined  | Genome-fragment | NA              |       | 0     |
| 58_extracted_k141_186457  | 1271  | No  | NA | 0    | 1              | Not-determined  | Genome-fragment | NA              |       | 0     |
| 58_extracted_k141_117846  | 1489  | No  | NA | 0    | 2              | Not-determined  | Genome-fragment | NA              |       | 0     |
| 58_extracted_k141_48094   | 1731  | No  | NA | 0    | 1              | Not-determined  | Genome-fragment | NA              |       | 0     |
| 58_extracted_k141_30928   | 1302  | No  | NA | 0    | 0              | Not-determined  | Genome-fragment | NA              |       | 0     |
| 58_extracted_k141_152542  | 3689  | No  | NA | 0    | 2              | Not-determined  | Genome-fragment | NA              |       | 0     |
| 52_vs_k141_191871[full]   | 8905  | No  | NA | 3    | 0              | Low-quality     | Genome-fragment | NA              | 27.1  | 0     |
| 58_extracted_k141_83131   | 3836  | No  | NA | 0    | 1              | Not-determined  | Genome-fragment | NA              |       | 0     |
| 58_extracted_k141_91840   | 3469  | No  | NA | 0    | 0              | Not-determined  | Genome-fragment | NA              |       | 0     |
| 58_extracted_k141_39945   | 1981  | No  | NA | 0    | 1              | Not-determined  | Genome-fragment | NA              |       | 0     |
| 58_extracted_k141_117884  | 2020  | No  | NA | 0    | 3              | Not-determined  | Genome-fragment | NA              |       | 0     |
| 58_extracted_k141_83151   | 1569  | No  | NA | 0    | 1              | Not-determined  | Genome-fragment | NA              |       | 0     |
| 58_extracted_k141_13564   | 4058  | No  | NA | 0    | 2              | Not-determined  | Genome-fragment | NA              |       | 0     |
| 58_extracted_k141_91867   | 1065  | No  | NA | 0    | 1              | Not-determined  | Genome-fragment | NA              |       | 0     |
| 58_extracted_k141_91872   | 1454  | No  | NA | 0    | 2              | Not-determined  | Genome-fragment | NA              |       | 0     |
| 511_extracted_k141_2645   | 8910  | No  | NA | 2    | 0              | Low-quality     | Genome-fragment | NA              | 5.47  | 0     |
| 58_extracted_k141_22818   | 3102  | No  | NA | 0    | 2              | Not-determined  | Genome-fragment | NA              |       | 0     |
| 58_extracted_k141_135048  | 1756  | No  | NA | 0    | 1              | Not-determined  | Genome-fragment | NA              |       | 0     |
| 514_vs_k141_641071[full]  | 8910  | No  | NA | 0    | 5              | Low-quality     | Genome-fragment | NA              | 5.09  | 0     |
| 58_extracted_k141_160859  | 3179  | No  | NA | 0    | 1              | Not-determined  | Genome-fragment | NA              |       | 0     |
| 58_extracted_k141_153060  | 3656  | No  | NA | 0    | 3              | Not-determined  | Genome-fragment | NA              |       | 0     |
| 58_extracted_k141_40008   | 1452  | No  | NA | 0    | 1              | Not-determined  | Genome-fragment | NA              |       | 0     |
| 58_extracted_k141_60734   | 1112  | No  | NA | 0    | 0              | Not-determined  | Genome-fragment | NA              |       | 0     |
| 58_extracted_k141_91912   | 4836  | No  | NA | 0    | 2              | Not-determined  | Genome-fragment | NA              |       | 0     |
| 513_vs_395001[full]       | 8920  | No  | NA | 0    | 0              | Low-quality     | Genome-fragment | NA              | 30.21 | 0     |
| 58_extracted_k141_135076  | 2969  | No  | NA | 0    | 4              | Not-determined  | Genome-fragment | NA              |       | 0     |
| 58_extracted_k141_170178  | 1471  | No  | NA | 0    | 1              | Not-determined  | Genome-fragment | NA              |       | 0     |
| 58_extracted_k141_178798  | 1508  | No  | NA | 0    | 1              | Not-determined  | Genome-fragment | NA              |       | 0     |
| 58_extracted_k141_91949   | 3069  | No  | NA | 0    | 0              | Not-determined  | Genome-fragment | NA              |       | 0     |
| 516_vs_1058841[full]      | 8928  | No  | NA | 0    | 5              | Low-quality     | Genome-fragment | NA              | 6.05  | 0     |
| 58_extracted_k141_170209  | 1117  | No  | NA | 0    | 0              | Not-determined  | Genome-fragment | NA              |       | 0     |
| 58_extracted_k141_160918  | 1877  | No  | NA | 0    | 2              | Not-determined  | Genome-fragment | NA              |       | 0     |
| 55_extracted_k141_104932  | 8932  | No  | NA | 0    | 9              | Low-quality     | Genome-fragment | NA              | 22.8  | 0     |
| 58_extracted_k141_74118   | 1643  | No  | NA | 0    | 1              | Not-determined  | Genome-fragment | NA              |       | 0     |
| 58_extracted_k141_160920  | 2438  | No  | NA | 0    | 1              | Not-determined  | Genome-fragment | NA              |       | 0     |
| 58_extracted_k141_57536   | 4987  | No  | NA | 0    | 4              | Not-determined  | Genome-fragment | NA              |       | 0     |
| 515_extracted_25823       | 8942  | No  | NA | 0    | 0              | Low-quality     | Genome-fragment | NA              | 4.74  | 0     |
| 58_extracted_k141_136281  | 1344  | No  | NA | 0    | 5              | Not-determined  | Genome-fragment | NA              |       | 0     |
| 58_extracted_k141_126602  | 7681  | No  | NA | 0    | 4              | Not-determined  | Genome-fragment | NA              |       | 0     |
| 58_extracted_k141_22913   | 1042  | No  | NA | 0    | 1              | Not-determined  | Genome-fragment | NA              |       | 0     |
| 58_extracted_k141_152644  | 1167  | No  | NA | 0    | 0              | Not-determined  | Genome-fragment | NA              |       | 0     |
| 58_extracted_k141_178850  | 3850  | No  | NA | 0    | 0              | Not-determined  | Genome-fragment | NA              |       | 0     |
| 53_vs_k141_357851[full]   | 8947  | No  | NA | 1    | 0              | Low-quality     | Genome-fragment | NA              | 6.69  | 0     |
| 58_extracted_k141_186380  | 2498  | No  | NA | 0    | 0              | Not-determined  | Genome-fragment | NA              |       | 0     |
| 512_vs_k141_1710211[full] | 8947  | No  | NA | 0    | 5              | Low-quality     | Genome-fragment | NA              | 23.61 | 0     |
| 58_extracted_k141_109494  | 1658  | No  | NA | 0    | 0              | Not-determined  | Genome-fragment | NA              |       | 0     |
| 58_extracted_k141_152646  | 1021  | No  | NA | 0    | 1              | Not-determined  | Genome-fragment | NA              |       | 0     |
| 58_extracted_k141_40056   | 1152  | No  | NA | 0    | 1              | Not-determined  | Genome-fragment | NA              |       | 0     |
| 58_extracted_k141_152652  | 1759  | No  | NA | 0    | 3              | Not-determined  | Genome-fragment | NA              |       | 0     |
| 53_vs_k141_799071[full]   | 8956  | No  | NA | 3    | 0              | Low-quality     | Genome-fragment | NA              | 4.35  | 0     |
| 58_extracted_k141_186587  | 8658  | No  | NA | 2    | Not-determined | Genome-fragment | NA              |                 | 0     |       |
| 58_extracted_k141_178862  | 5719  | No  | NA | 0    | 0              | Not-determined  | Genome-fragment | NA              |       | 0     |
| 58_extracted_k141_31476   | 1203  | No  | NA | 0    | 1              | Not-determined  | Genome-fragment | NA              |       | 0     |
| 58_extracted_k141_109598  | 2177  | No  | NA | 0    | 2              | Not-determined  | Genome-fragment | NA              |       | 0     |
| 58_extracted_k141_156638  | 1778  | No  | NA | 0    | 2              | Not-determined  | Genome-fragment | NA              |       | 0     |
| 58_extracted_k141_83295   | 1907  | No  | NA | 0    | 1              | Not-determined  | Genome-fragment | NA              |       | 0     |
| 53_vs_k141_1093581[full]  | 8956  | No  | NA | 1    | 0              | Low-quality     | Genome-fragment | NA              | 16.44 | 0     |
| 55_vs_k141_353551[full]   | 8956  | No  | NA | 0    | 1              | Low-quality     | Genome-fragment | NA              | 16.83 | 0     |
| 58_extracted_k141_170266  | 1445  | No  | NA | 0    | 0              | Not-determined  | Genome-fragment | NA              |       | 0     |
| 58_extracted_k141_152674  | 1852  | No  | NA | 0    | 0              | Not-determined  | Genome-fragment | NA              |       | 0     |
| 57_vs_313611[full]        | 8966  | No  | NA | 0    | 3              | Low-quality     | Genome-fragment | NA              | 5.54  | 0     |
| 58_extracted_k141_160972  | 1040  | No  | NA | 0    | 0              | Not-determined  | Genome-fragment | NA              |       | 0     |
| 58_extracted_k141_92006   | 1029  | No  | NA | 0    | 0              | Not-determined  | Genome-fragment | NA              |       | 0     |
| 58_extracted_k141_74170   | 1185  | No  | NA | 0    | 0              | Not-determined  | Genome-fragment | NA              |       | 0     |
| 58_extracted_k141_152679  | 1318  | No  | NA | 0    | 0              | Not-determined  | Genome-fragment | NA              |       | 0     |
| 58_extracted_k141_92007   | 1614  | No  | NA | 0    | 0              | Not-determined  | Genome-fragment | NA              |       | 0     |
| 58_extracted_k141_40074   | 1115  | No  | NA | 0    | 1              | Not-determined  | Genome-fragment | NA              |       | 0     |
| 58_extracted_k141_170277  | 1172  | No  | NA | 0    | 1              | Not-determined  | Genome-fragment | NA              |       | 0     |
| 58_extracted_k141_135179  | 4846  | No  | NA | 0    | 2              | Not-determined  | Genome-fragment | NA              |       | 0     |
| 58_extracted_k141_83319   | 111   |     |    |      |                |                 |                 |                 |       |       |



|                          |        |       |      |    |    |   |                |                 |       |   |
|--------------------------|--------|-------|------|----|----|---|----------------|-----------------|-------|---|
| 511_vs_k141_101603       | [full] | 9029  | No   | NA | 7  | 0 | Low-quality    | Genome-fragment | 26.82 | 0 |
| 58_extracted_k141_48320  |        | 4742  | No   | NA | 0  | 2 | Not-determined | Genome-fragment | NA    | 0 |
| 58_extracted_k141_170390 |        | 1279  | No   | NA | 0  | 0 | Not-determined | Genome-fragment | NA    | 0 |
| 58_extracted_k141_161124 |        | 6663  | No   | NA | 0  | 2 | Not-determined | Genome-fragment | NA    | 0 |
| 58_extracted_k141_11738  |        | 20841 | No   | NA | 13 | 0 | Medium-quality | Genome-fragment | 58.98 | 0 |
| 58_extracted_k141_144324 |        | 1098  | No   | NA | 0  | 1 | Not-determined | Genome-fragment | NA    | 0 |
| 58_extracted_k141_196435 |        | 3436  | No   | NA | 0  | 2 | Not-determined | Genome-fragment | NA    | 0 |
| 58_extracted_k141_204602 |        | 1776  | No   | NA | 0  | 0 | Not-determined | Genome-fragment | NA    | 0 |
| 58_extracted_k141_176795 |        | 2071  | No   | NA | 0  | 2 | Not-determined | Genome-fragment | NA    | 0 |
| 58_extracted_k141_5269   |        | 1155  | No   | NA | 0  | 1 | Not-determined | Genome-fragment | NA    | 0 |
| 58_extracted_k141_57717  |        | 1033  | No   | NA | 0  | 0 | Not-determined | Genome-fragment | NA    | 0 |
| 58_extracted_k141_83459  |        | 1450  | No   | NA | 0  | 1 | Not-determined | Genome-fragment | NA    | 0 |
| 58_extracted_k141_135295 |        | 3134  | No   | NA | 0  | 2 | Not-determined | Genome-fragment | NA    | 0 |
| 58_extracted_k141_48356  |        | 1489  | No   | NA | 0  | 2 | Not-determined | Genome-fragment | NA    | 0 |
| 58_extracted_k141_74340  |        | 2569  | No   | NA | 0  | 1 | Not-determined | Genome-fragment | NA    | 0 |
| 58_extracted_k141_109646 |        | 1108  | No   | NA | 0  | 1 | Not-determined | Genome-fragment | NA    | 0 |
| 58_extracted_k141_204611 |        | 2218  | No   | NA | 0  | 3 | Not-determined | Genome-fragment | NA    | 0 |
| 58_extracted_k141_196469 |        | 1629  | No   | NA | 0  | 2 | Not-determined | Genome-fragment | NA    | 0 |
| 58_extracted_k141_40361  |        | 2450  | No   | NA | 0  | 0 | Not-determined | Genome-fragment | NA    | 0 |
| 58_extracted_k141_135310 |        | 1111  | No   | NA | 0  | 2 | Not-determined | Genome-fragment | NA    | 0 |
| 58_extracted_k141_83469  |        | 3152  | No   | NA | 0  | 1 | Not-determined | Genome-fragment | NA    | 0 |
| 58_extracted_k141_136821 |        | 2147  | No   | NA | 0  | 0 | Not-determined | Genome-fragment | NA    | 0 |
| 58_extracted_k141_48368  |        | 3342  | No   | NA | 0  | 3 | Not-determined | Genome-fragment | NA    | 0 |
| 58_extracted_k141_144360 |        | 2167  | No   | NA | 0  | 2 | Not-determined | Genome-fragment | NA    | 0 |
| 58_extracted_k141_74354  |        | 1470  | No   | NA | 0  | 0 | Not-determined | Genome-fragment | NA    | 0 |
| 58_extracted_k141_5297   |        | 4045  | No   | NA | 0  | 3 | Not-determined | Genome-fragment | NA    | 0 |
| 58_extracted_k141_83476  |        | 1315  | No   | NA | 0  | 0 | Not-determined | Genome-fragment | NA    | 0 |
| 58_extracted_k141_57752  |        | 1008  | No   | NA | 0  | 2 | Not-determined | Genome-fragment | NA    | 0 |
| 58_extracted_k141_92198  |        | 1368  | No   | NA | 0  | 1 | Not-determined | Genome-fragment | NA    | 0 |
| 58_extracted_k141_144367 |        | 1291  | No   | NA | 0  | 0 | Not-determined | Genome-fragment | NA    | 0 |
| 58_extracted_k141_135324 |        | 1318  | No   | NA | 0  | 1 | Not-determined | Genome-fragment | NA    | 0 |
| 58_extracted_k141_136823 |        | 1157  | No   | NA | 0  | 0 | Not-determined | Genome-fragment | NA    | 0 |
| 58_extracted_k141_126825 |        | 1777  | No   | NA | 0  | 0 | Not-determined | Genome-fragment | NA    | 0 |
| 58_extracted_k141_13774  |        | 1232  | No   | NA | 0  | 1 | Not-determined | Genome-fragment | NA    | 0 |
| 58_extracted_k141_48385  |        | 1969  | No   | NA | 0  | 1 | Not-determined | Genome-fragment | NA    | 0 |
| 58_extracted_k141_144381 |        | 5955  | No   | NA | 0  | 1 | Not-determined | Genome-fragment | NA    | 0 |
| 58_extracted_k141_179092 |        | 2360  | No   | NA | 0  | 3 | Not-determined | Genome-fragment | NA    | 0 |
| 58_extracted_k141_179098 |        | 2110  | No   | NA | 0  | 2 | Not-determined | Genome-fragment | NA    | 0 |
| 58_extracted_k141_83501  |        | 1628  | No   | NA | 0  | 0 | Not-determined | Genome-fragment | NA    | 0 |
| 58_extracted_k141_196511 |        | 1119  | No   | NA | 0  | 0 | Not-determined | Genome-fragment | NA    | 0 |
| 58_vs_k141_20968         | [full] | 9031  | No   | NA | 1  | 1 | Low-quality    | Genome-fragment | 17.79 | 0 |
| 510_vs_12789             | [full] | 9032  | No   | NA | 1  | 2 | Low-quality    | Genome-fragment | 13.94 | 0 |
| 58_extracted_k141_104208 |        | 9039  | No   | NA | 8  | 0 | Low-quality    | Genome-fragment | 24.19 | 0 |
| 58_extracted_k141_152878 |        | 4421  | No   | NA | 0  | 3 | Not-determined | Genome-fragment | NA    | 0 |
| 58_extracted_k141_92210  |        | 1238  | No   | NA | 0  | 0 | Not-determined | Genome-fragment | NA    | 0 |
| 58_extracted_k141_100423 |        | 3403  | No   | NA | 0  | 0 | Not-determined | Genome-fragment | NA    | 0 |
| 516_vs_4222              | [full] | 9042  | No   | NA | 0  | 2 | Low-quality    | Genome-fragment | 15.59 | 0 |
| 58_extracted_k141_13176  |        | 2520  | No   | NA | 0  | 2 | Not-determined | Genome-fragment | NA    | 0 |
| 58_extracted_k141_100426 |        | 1905  | No   | NA | 0  | 0 | Not-determined | Genome-fragment | NA    | 0 |
| 58_extracted_k141_100427 |        | 1027  | No   | NA | 0  | 1 | Not-determined | Genome-fragment | NA    | 0 |
| 58_extracted_k141_40153  |        | 1154  | No   | NA | 0  | 1 | Not-determined | Genome-fragment | NA    | 0 |
| 58_extracted_k141_57795  |        | 1473  | No   | NA | 0  | 1 | Not-determined | Genome-fragment | NA    | 0 |
| 58_extracted_k141_170430 |        | 48662 | No   | NA | 13 | 1 | Complete       | High-quality    | 100   | 0 |
| 58_extracted_k141_144397 |        | 1068  | No   | NA | 0  | 0 | Not-determined | Genome-fragment | NA    | 0 |
| 58_extracted_k141_74430  |        | 2691  | No   | NA | 0  | 1 | Not-determined | Genome-fragment | NA    | 0 |
| 58_extracted_k141_97802  |        | 1924  | No   | NA | 0  | 0 | Not-determined | Genome-fragment | NA    | 0 |
| 58_extracted_k141_179125 |        | 3627  | No   | NA | 0  | 3 | Not-determined | Genome-fragment | NA    | 0 |
| 58_extracted_k141_57807  |        | 1903  | No   | NA | 0  | 2 | Not-determined | Genome-fragment | NA    | 0 |
| 58_extracted_k141_100440 |        | 1312  | No   | NA | 0  | 0 | Not-determined | Genome-fragment | NA    | 0 |
| 58_extracted_k141_135370 |        | 6124  | No   | NA | 0  | 4 | Not-determined | Genome-fragment | NA    | 0 |
| 58_extracted_k141_40162  |        | 3781  | No   | NA | 0  | 0 | Not-determined | Genome-fragment | NA    | 0 |
| 58_extracted_k141_13806  |        | 4586  | No   | NA | 0  | 1 | Not-determined | Genome-fragment | NA    | 0 |
| 58_extracted_k141_152899 |        | 2544  | No   | NA | 0  | 2 | Not-determined | Genome-fragment | NA    | 0 |
| 58_extracted_k141_126853 |        | 1414  | No   | NA | 0  | 1 | Not-determined | Genome-fragment | NA    | 0 |
| 58_extracted_k141_92229  |        | 3857  | No   | NA | 0  | 0 | Not-determined | Genome-fragment | NA    | 0 |
| 58_extracted_k141_135391 |        | 1829  | No   | NA | 0  | 1 | Not-determined | Genome-fragment | NA    | 0 |
| 58_extracted_k141_40182  |        | 3424  | No   | NA | 0  | 1 | Not-determined | Genome-fragment | NA    | 0 |
| 58_extracted_k141_204713 |        | 3823  | No   | NA | 0  | 2 | Not-determined | Genome-fragment | NA    | 0 |
| 58_extracted_k141_186771 |        | 1572  | No   | NA | 0  | 0 | Not-determined | Genome-fragment | NA    | 0 |
| 58_extracted_k141_135413 |        | 1800  | No   | NA | 0  | 0 | Not-determined | Genome-fragment | NA    | 0 |
| 58_extracted_k141_13812  |        | 5032  | No   | NA | 0  | 6 | Not-determined | Genome-fragment | NA    | 0 |
| 58_extracted_k141_18677  |        | 1322  | No   | NA | 0  | 1 | Not-determined | Genome-fragment | NA    | 0 |
| 58_extracted_k141_179187 |        | 1428  | No   | NA | 0  | 1 | Not-determined | Genome-fragment | NA    | 0 |
| 58_vs_k141_154178        | [full] | 9046  | No   | NA | 12 | 0 | Low-quality    | Genome-fragment | 24.44 | 0 |
| 55_extracted_k141_54124  |        | 9052  | No   | NA | 3  | 0 | Low-quality    | Genome-fragment | 17.87 | 0 |
| 58_extracted_k141_186789 |        | 1063  | No   | NA | 0  | 0 | Not-determined | Genome-fragment | NA    | 0 |
| 58_extracted_k141_13821  |        | 6565  | No   | NA | 0  | 1 | Not-determined | Genome-fragment | NA    | 0 |
| 58_extracted_k141_170462 |        | 4010  | No   | NA | 0  | 3 | Not-determined | Genome-fragment | NA    | 0 |
| 58_extracted_k141_152842 |        | 2382  | No   | NA | 0  | 0 | Not-determined | Genome-fragment | NA    | 0 |
| 58_extracted_k141_13825  |        | 1273  | No   | NA | 0  | 0 | Not-determined | Genome-fragment | NA    | 0 |
| 58_extracted_k141_179159 |        | 2045  | No   | NA | 0  | 2 | Not-determined | Genome-fragment | NA    | 0 |
| 58_extracted_k141_57883  |        | 1394  | No   | NA | 0  | 0 | Not-determined | Genome-fragment | NA    | 0 |
| 58_extracted_k141_100526 |        | 1004  | No   | NA | 0  | 0 | Not-determined | Genome-fragment | NA    | 0 |
| 58_extracted_k141_126880 |        | 1055  | No   | NA | 0  | 0 | Not-determined | Genome-fragment | NA    | 0 |
| 58_extracted_k141_40250  |        | 1146  | No   | NA | 0  | 2 | Not-determined | Genome-fragment | NA    | 0 |
| 58_extracted_k141_92298  |        | 4280  | No   | NA | 0  | 1 | Not-determined | Genome-fragment | NA    | 0 |
| 58_extracted_k141_23171  |        | 1938  | No   | NA | 0  | 1 | Not-determined | Genome-fragment | NA    | 0 |
| 58_extracted_k141_13795  |        | 1068  | No   | NA | 0  | 0 | Not-determined | Genome-fragment | NA    | 0 |
| 58_extracted_k141_74497  |        | 2933  | No   | NA | 0  | 0 | Not-determined | Genome-fragment | NA    | 0 |
| 58_extracted_k141_161279 |        | 6422  | No   | NA | 0  | 1 | Not-determined | Genome-fragment | NA    | 0 |
| 58_extracted_k141_118313 |        | 2562  | No   | NA | 0  | 1 | Not-determined | Genome-fragment | NA    | 0 |
| 58_extracted_k141_5435   |        | 1034  | No   | NA | 0  | 0 | Not-determined | Genome-fragment | NA    | 0 |
| 58_extracted_k141_23182  |        | 3018  | No   | NA | 0  | 0 | Not-determined | Genome-fragment | NA    | 0 |
| 58_extracted_k141_13855  |        | 1394  | No   | NA | 0  | 1 | Not-determined | Genome-fragment | NA    | 0 |
| 512_vs_k141_39095        | [full] | 9052  | No   | NA | 7  | 1 | Low-quality    | Genome-fragment | 9.74  | 0 |
| 58_extracted_k141_5437   |        | 3483  | No   | NA | 0  | 7 | Not-determined | Genome-fragment | NA    | 0 |
| 58_extracted_k141_100563 |        | 1157  | No   | NA | 0  | 1 | Not-determined | Genome-fragment | NA    | 0 |
| 517_extracted_k141_15933 |        | 9054  | No   | NA | 1  | 1 | Low-quality    | Genome-fragment | 4.91  | 0 |
| 58_extracted_k141_186646 |        | 1614  | No   | NA | 0  | 0 | Not-determined | Genome-fragment | NA    | 0 |
| 58_extracted_k141_40274  |        | 1269  | No   | NA | 0  | 0 | Not-determined | Genome-fragment | NA    | 0 |
| 58_extracted_k141_186647 |        | 5863  | No   | NA | 0  | 1 | Not-determined | Genome-fragment | NA    | 0 |
| 58_extracted_k141_186684 |        | 3283  | No   | NA | 0  | 0 | Not-determined | Genome-fragment | NA    | 0 |
| 58_extracted_k141_118338 |        | 1135  | No   | NA | 0  | 0 | Not-determined | Genome-fragment | NA    | 0 |
| 58_extracted_k141_170513 |        | 1490  | No   | NA | 0  | 1 | Not-determined | Genome-fragment | NA    | 0 |
| 58_extracted_k141_135515 |        | 1459  | No   | NA | 0  | 0 | Not-determined | Genome-fragment | NA    | 0 |
| 58_extracted_k141_66035  |        | 1023  | No   | NA | 0  | 0 | Not-determined | Genome-fragment | NA    | 0 |
| 53_extracted_k141_67657  |        | 9057  | No   | NA | 2  | 0 | Low-quality    | Genome-fragment | 7.37  | 0 |
| 58_extracted_k141_5483   |        | 1021  | No   | NA | 0  | 1 | Not-determined | Genome-fragment | NA    | 0 |
| 58_extracted_k141_161133 |        | 5924  | No   | NA | 0  | 1 | Not-determined | Genome-fragment | NA    | 0 |
| 58_extracted_k141_74550  |        | 1291  | No   | NA | 0  | 0 | Not-determined | Genome-fragment | NA    | 0 |
| 55_extracted_k141_94392  |        | 9059  | No   | NA | 4  | 0 | Low-quality    | Genome-fragment | 6.51  | 0 |
| 58_extracted_k141_156840 |        | 1173  | No   | NA | 0  | 0 | Not-determined | Genome-fragment | NA    | 0 |
| 58_extracted_k141_57964  |        | 3805  | No   | NA | 0  | 0 | Not-determined | Genome-fragment | NA    | 0 |
| 59_vs_k141_49309         | [full] | 9065  | No   | NA | 1  | 1 | Low-quality    | Genome-fragment | 20.47 | 0 |
| 58_extracted_k141_135549 |        | 1259  | No   | NA | 0  | 1 | Not-determined | Genome-fragment | NA    | 0 |
| 516_extracted_149092     |        | 9065  | No   | NA | 0  | 5 | Low-quality    | Genome-fragment | 2.87  | 0 |
| 58_extracted_k141_196670 |        | 15088 | No   | NA | 7  | 0 | Medium-quality | Genome-fragment | 72.82 | 0 |
| 51_vs_k141_102159        | [full] | 9075  | No   | NA | 0  | 0 | Low-quality    | Genome-fragment | 28.26 | 0 |
| 58_extracted_k141_91380  |        | 4071  | No   | NA | 0  | 0 | Not-determined | Genome-fragment | NA    | 0 |
| 58_extracted_k141_153084 |        | 1225  | No   | NA | 0  | 2 | Not-determined | Genome-fragment | NA    | 0 |
| 58_extracted_k141_74590  |        | 1391  | No   | NA | 0  | 1 | Not-determined | Genome-fragment | NA    | 0 |
| 58_extracted_k141_5524   |        | 1156  | No   | NA | 0  | 0 | Not-determined | Genome-fragment | NA    | 0 |
| 58_extracted_k141_109814 |        | 1009  | No   | NA | 0  | 1 | Not-determined | Genome-fragment | NA    | 0 |
| 58_extracted_k141_126977 |        | 1084  | No   | NA | 0  | 1 | Not-determined | Genome-fragment | NA    | 0 |
| 59_vs_k141_83148         | [full] | 9089  | No   | NA | 1  | 1 | Low-quality    | Genome-fragment | 22.26 | 0 |
| 58_extracted_k141_40343  |        | 2362  | No   | NA | 0  | 2 | Not-determined | Genome-fragment | NA    | 0 |
| 58_extracted_k141_118420 |        | 1203  | No   | NA | 0  | 2 | Not-determined | Genome-fragment | NA    | 0 |
| 58_extracted_k141_153309 |        | 5235  | No   | NA | 0  | 0 | Not-determined | Genome-fragment | NA    | 0 |
| 58_extracted_k141_13928  |        | 3431  | No   | NA | 0  | 1 | Not-determined | Genome-fragment | NA    | 0 |
| 58_extracted_k141_118429 |        | 1090  | No   | NA | 0  | 0 | Not-determined | Genome-fragment | NA    | 0 |
| 58_extracted_k141_11932  |        | 1922  | No   | NA | 0  | 2 | Not-determined | Genome-fragment | NA    | 0 |
| 58_extracted_k141_186697 |        | 1023  | No   | NA | 0  | 1 | Not-determined | Genome-fragment | NA    | 0 |
| 58_extracted_k141_92424  |        | 1877  | No   | NA | 0  | 0 | Not-determined | Genome-fragment | NA    | 0 |
| 58_extracted_k141_131909 |        | 1883  | No   | NA | 0  | 0 | Not-determined | Genome-fragment | NA    | 0 |
| 511_vs_k141_14014        | [full] | 9091  | No   | NA | 1  | 0 | Low-quality    | Genome-fragment | 26.58 | 0 |
| 58_extracted_k141_92436  |        | 1257  | No   | NA | 0  | 1 | Not-determined | Genome-fragment | NA    | 0 |
| 514_vs_k141_39537        | [full] | 9092  | No   | NA | 0  | 4 | Low-quality    | Genome-fragment | 10.9  | 0 |
| 58_extracted_k141_179212 |        | 1754  | No</ |    |    |   |                |                 |       |   |



|                           |        |    |      |    |   |                |                 |    |       |
|---------------------------|--------|----|------|----|---|----------------|-----------------|----|-------|
| S8_extracted_k141_109903  | 1160   | No | NA   | 0  | 1 | Not-determined | Genome-fragment | NA | 0     |
| S8_extracted_k141_170665  | 3313   | No | NA   | 0  | 2 | Not-determined | Genome-fragment | NA | 0     |
| S8_extracted_k141_48709   | 1057   | No | NA   | 0  | 0 | Not-determined | Genome-fragment | NA | 0     |
| S8_extracted_k141_118544  | 1583   | No | NA   | 0  | 2 | Not-determined | Genome-fragment | NA | 0     |
| S8_extracted_k141_21286   | 1388   | No | NA   | 0  | 0 | Not-determined | Genome-fragment | NA | 0     |
| S3_vs_k141_1132471[full]  | 9115   | No | NA   | 0  | 1 | Low-quality    | Genome-fragment | NA | 34.66 |
| S8_extracted_k141_135693  | 1106   | No | NA   | 0  | 0 | Not-determined | Genome-fragment | NA | 0     |
| S8_extracted_k141_23293   | 3328   | No | NA   | 0  | 2 | Not-determined | Genome-fragment | NA | 0     |
| S11_vs_k141_699071[full]  | 9125   | No | NA   | 0  | 1 | Low-quality    | Genome-fragment | NA | 23.84 |
| S8_extracted_k141_135704  | 2734   | No | NA   | 0  | 2 | Not-determined | Genome-fragment | NA | 0     |
| S8_extracted_k141_100726  | 1065   | No | NA   | 0  | 0 | Not-determined | Genome-fragment | NA | 0     |
| S8_extracted_k141_127085  | 1735   | No | NA   | 0  | 1 | Not-determined | Genome-fragment | NA | 0     |
| S8_extracted_k141_100728  | 1086   | No | NA   | 0  | 0 | Not-determined | Genome-fragment | NA | 0     |
| S8_extracted_k141_40477   | 2014   | No | NA   | 0  | 2 | Not-determined | Genome-fragment | NA | 0     |
| S8_extracted_k141_90529   | 1221   | No | NA   | 0  | 1 | Not-determined | Genome-fragment | NA | 0     |
| S8_extracted_k141_100749  | 1010   | No | NA   | 0  | 0 | Not-determined | Genome-fragment | NA | 0     |
| S8_extracted_k141_161528  | 2924   | No | NA   | 0  | 2 | Not-determined | Genome-fragment | NA | 0     |
| S8_extracted_k141_40491   | 1858   | No | NA   | 0  | 1 | Not-determined | Genome-fragment | NA | 0     |
| S8_extracted_k141_20214   | 1465   | No | NA   | 0  | 1 | Not-determined | Genome-fragment | NA | 0     |
| S8_extracted_k141_48746   | 1040   | No | NA   | 0  | 1 | Not-determined | Genome-fragment | NA | 0     |
| S8_extracted_k141_109947  | 1987   | No | NA   | 0  | 1 | Not-determined | Genome-fragment | NA | 0     |
| S8_extracted_k141_179319  | 3404   | No | NA   | 0  | 2 | Not-determined | Genome-fragment | NA | 0     |
| S8_extracted_k141_118581  | 7013   | No | NA   | 0  | 4 | Not-determined | Genome-fragment | NA | 0     |
| S8_extracted_k141_48750   | 1527   | No | NA   | 0  | 1 | Not-determined | Genome-fragment | NA | 0     |
| S8_extracted_k141_161541  | 4440   | No | NA   | 0  | 1 | Not-determined | Genome-fragment | NA | 0     |
| S8_extracted_k141_5674    | 3585   | No | NA   | 0  | 2 | Not-determined | Genome-fragment | NA | 0     |
| S8_extracted_k141_14095   | 2571   | No | NA   | 0  | 1 | Not-determined | Genome-fragment | NA | 0     |
| S3_vs_k141_7331[full]     | 9128   | No | NA   | 0  | 5 | Low-quality    | Genome-fragment | NA | 16.47 |
| S8_extracted_k141_74733   | 1081   | No | NA   | 0  | 1 | Not-determined | Genome-fragment | NA | 0     |
| S8_extracted_k141_161549  | 1873   | No | NA   | 0  | 2 | Not-determined | Genome-fragment | NA | 0     |
| S3_vs_k141_263831[full]   | 9129   | No | NA   | 4  | 0 | Low-quality    | Genome-fragment | NA | 14.88 |
| S8_extracted_k141_23367   | 3324   | No | NA   | 0  | 1 | Not-determined | Genome-fragment | NA | 0     |
| S17_extracted_k141_102593 | 9132   | No | NA   | 5  | 0 | Low-quality    | Genome-fragment | NA | 23.3  |
| S8_extracted_k141_153243  | 4789   | No | NA   | 0  | 4 | Not-determined | Genome-fragment | NA | 0     |
| S10_vs_2858[full]         | 9136   | No | NA   | 2  | 0 | Low-quality    | Genome-fragment | NA | 5.59  |
| S8_extracted_k141_161586  | 3138   | No | NA   | 0  | 2 | Not-determined | Genome-fragment | NA | 0     |
| S8_extracted_k141_40562   | 1077   | No | NA   | 0  | 0 | Not-determined | Genome-fragment | NA | 0     |
| S8_extracted_k141_153249  | 5287   | No | NA   | 0  | 9 | Not-determined | Genome-fragment | NA | 0     |
| S8_extracted_k141_100819  | 1836   | No | NA   | 0  | 2 | Not-determined | Genome-fragment | NA | 0     |
| S17_vs_k141_705221[full]  | 9138   | No | NA   | 0  | 1 | Low-quality    | Genome-fragment | NA | 7.7   |
| S8_extracted_k141_74799   | 1051   | No | NA   | 0  | 0 | Not-determined | Genome-fragment | NA | 0     |
| S8_extracted_k141_83689   | 1717   | No | NA   | 0  | 1 | Not-determined | Genome-fragment | NA | 0     |
| S8_extracted_k141_179395  | 7558   | No | NA   | 0  | 6 | Not-determined | Genome-fragment | NA | 0     |
| S8_extracted_k141_58167   | 1096   | No | NA   | 0  | 1 | Not-determined | Genome-fragment | NA | 0     |
| S14_extracted_k141_89650  | 9141   | No | NA   | 20 | 0 | Low-quality    | Genome-fragment | NA | 30.04 |
| S8_extracted_k141_179399  | 1707   | No | NA   | 0  | 2 | Not-determined | Genome-fragment | NA | 0     |
| S8_extracted_k141_179403  | 1178   | No | NA   | 0  | 1 | Not-determined | Genome-fragment | NA | 0     |
| S8_extracted_k141_205024  | 3411   | No | NA   | 0  | 1 | Not-determined | Genome-fragment | NA | 0     |
| S8_extracted_k141_14142   | 1301   | No | NA   | 0  | 1 | Not-determined | Genome-fragment | NA | 0     |
| S8_extracted_k141_187073  | 1141   | No | NA   | 0  | 1 | Not-determined | Genome-fragment | NA | 0     |
| S3_vs_k141_92211[full]    | 9145   | No | NA   | 2  | 1 | Low-quality    | Genome-fragment | NA | 23.03 |
| S8_extracted_k141_205036  | 1606   | No | NA   | 0  | 1 | Not-determined | Genome-fragment | NA | 0     |
| S8_extracted_k141_110040  | 1616   | No | NA   | 0  | 0 | Not-determined | Genome-fragment | NA | 0     |
| S8_extracted_k141_74826   | 4281   | No | NA   | 0  | 2 | Not-determined | Genome-fragment | NA | 0     |
| S8_extracted_k141_144724  | 1093   | No | NA   | 0  | 1 | Not-determined | Genome-fragment | NA | 0     |
| S8_extracted_k141_161635  | 1115   | No | NA   | 0  | 0 | Not-determined | Genome-fragment | NA | 0     |
| S8_extracted_k141_127138  | 1161   | No | NA   | 0  | 0 | Not-determined | Genome-fragment | NA | 0     |
| S8_extracted_k141_153266  | 12670  | No | NA   | 0  | 4 | Not-determined | Genome-fragment | NA | 0     |
| S10_extracted_67261       | 9153   | No | NA   | 0  | 1 | Low-quality    | Genome-fragment | NA | 3.47  |
| S8_extracted_k141_179419  | 3502   | No | NA   | 0  | 4 | Not-determined | Genome-fragment | NA | 0     |
| S5_vs_k141_679351[full]   | 9156   | No | NA   | 3  | 1 | Low-quality    | Genome-fragment | NA | 20.83 |
| S8_extracted_k141_161649  | 1309   | No | NA   | 0  | 1 | Not-determined | Genome-fragment | NA | 0     |
| S8_extracted_k141_144760  | 1554   | No | NA   | 0  | 2 | Not-determined | Genome-fragment | NA | 0     |
| S8_extracted_k141_5791    | 1278   | No | NA   | 0  | 2 | Not-determined | Genome-fragment | NA | 0     |
| S8_extracted_k141_74861   | 6412   | No | NA   | 0  | 3 | Not-determined | Genome-fragment | NA | 0     |
| S8_extracted_k141_144764  | 1330   | No | NA   | 0  | 1 | Not-determined | Genome-fragment | NA | 0     |
| S8_extracted_k141_110089  | 1418   | No | NA   | 0  | 2 | Not-determined | Genome-fragment | NA | 0     |
| S8_extracted_k141_74868   | 1003   | No | NA   | 0  | 1 | Not-determined | Genome-fragment | NA | 0     |
| S8_extracted_k141_161660  | 2160   | No | NA   | 0  | 1 | Not-determined | Genome-fragment | NA | 0     |
| S8_extracted_k141_32127   | 1203   | No | NA   | 0  | 0 | Not-determined | Genome-fragment | NA | 0     |
| S8_extracted_k141_153294  | 3436   | No | NA   | 0  | 3 | Not-determined | Genome-fragment | NA | 0     |
| S4_extracted_23013        | 9156   | No | NA   | 0  | 0 | Low-quality    | Genome-fragment | NA | 4.76  |
| S8_extracted_k141_66318   | 5034   | No | NA   | 0  | 4 | Not-determined | Genome-fragment | NA | 0     |
| S8_extracted_k141_196935  | 2338   | No | NA   | 0  | 1 | Not-determined | Genome-fragment | NA | 0     |
| S8_extracted_k141_161675  | 1398   | No | NA   | 0  | 1 | Not-determined | Genome-fragment | NA | 0     |
| S8_extracted_k141_66321   | 1149   | No | NA   | 0  | 0 | Not-determined | Genome-fragment | NA | 0     |
| S8_extracted_k141_40628   | 6138   | No | NA   | 0  | 3 | Not-determined | Genome-fragment | NA | 0     |
| S8_extracted_k141_5812    | 2870   | No | NA   | 0  | 0 | Not-determined | Genome-fragment | NA | 0     |
| S3_vs_k141_678641[full]   | 9159   | No | NA   | 0  | 1 | Low-quality    | Genome-fragment | NA | 21.64 |
| S8_extracted_k141_74900   | 1775   | No | NA   | 0  | 1 | Not-determined | Genome-fragment | NA | 0     |
| S8_extracted_k141_144796  | 1241   | No | NA   | 0  | 1 | Not-determined | Genome-fragment | NA | 0     |
| S8_extracted_k141_153300  | 3987   | No | NA   | 0  | 1 | Not-determined | Genome-fragment | NA | 0     |
| S8_extracted_k141_48883   | 3404   | No | NA   | 0  | 2 | Not-determined | Genome-fragment | NA | 0     |
| S8_extracted_k141_110125  | 1076   | No | NA   | 0  | 0 | Not-determined | Genome-fragment | NA | 0     |
| S8_extracted_k141_179473  | 1980   | No | NA   | 0  | 2 | Not-determined | Genome-fragment | NA | 0     |
| S8_extracted_k141_74913   | 1136   | No | NA   | 0  | 0 | Not-determined | Genome-fragment | NA | 0     |
| S7_vs_104348[full]        | 9159   | No | NA   | 9  | 0 | Low-quality    | Genome-fragment | NA | 25.28 |
| S5_vs_k141_635951[full]   | 9166   | No | NA   | 2  | 0 | Low-quality    | Genome-fragment | NA | 24.88 |
| S8_extracted_k141_170743  | 2302   | No | NA   | 0  | 4 | Not-determined | Genome-fragment | NA | 0     |
| S8_extracted_k141_144828  | 1671   | No | NA   | 0  | 1 | Not-determined | Genome-fragment | NA | 0     |
| S8_extracted_k141_170744  | 1428   | No | NA   | 0  | 2 | Not-determined | Genome-fragment | NA | 0     |
| S8_extracted_k141_205131  | 1231   | No | NA   | 0  | 1 | Not-determined | Genome-fragment | NA | 0     |
| S11_extracted_k141_70784  | 9167   | No | NA   | 1  | 0 | Low-quality    | Genome-fragment | NA | 3.67  |
| S8_extracted_k141_58242   | 1146   | No | NA   | 0  | 0 | Not-determined | Genome-fragment | NA | 0     |
| S16_extracted_149503      | 9169   | No | NA   | 0  | 0 | Low-quality    | Genome-fragment | NA | 20.84 |
| S7_extracted_109603       | 9173   | No | NA   | 3  | 0 | Low-quality    | Genome-fragment | NA | 17.92 |
| S8_extracted_k141_100952  | 3719   | No | NA   | 0  | 1 | Not-determined | Genome-fragment | NA | 0     |
| S8_extracted_k141_23479   | 7860   | No | NA   | 0  | 6 | Not-determined | Genome-fragment | NA | 0     |
| S8_extracted_k141_5882    | 1397   | No | NA   | 0  | 1 | Not-determined | Genome-fragment | NA | 0     |
| S8_extracted_k141_187203  | 2836   | No | NA   | 0  | 3 | Not-determined | Genome-fragment | NA | 0     |
| S8_extracted_k141_127270  | 2718   | No | NA   | 0  | 2 | Not-determined | Genome-fragment | NA | 0     |
| S8_extracted_k141_118755  | 15190  | No | NA   | 0  | 1 | Not-determined | Genome-fragment | NA | 0     |
| S8_extracted_k141_179522  | 1041   | No | NA   | 0  | 2 | Not-determined | Genome-fragment | NA | 0     |
| S8_extracted_k141_66395   | 1220   | No | NA   | 0  | 1 | Not-determined | Genome-fragment | NA | 0     |
| S8_extracted_k141_20517   | 1621   | No | NA   | 0  | 1 | Not-determined | Genome-fragment | NA | 0     |
| S8_extracted_k141_100977  | 2503   | No | NA   | 0  | 1 | Not-determined | Genome-fragment | NA | 0     |
| S8_extracted_k141_74961   | 1021   | No | NA   | 0  | 1 | Not-determined | Genome-fragment | NA | 0     |
| S17_extracted_k141_169135 | 9180   | No | NA   | 2  | 0 | Low-quality    | Genome-fragment | NA | 8.21  |
| S8_extracted_k141_127811  | 4264   | No | NA   | 0  | 4 | Not-determined | Genome-fragment | NA | 18.26 |
| S13_vs_1276221[full]      | 9183   | No | NA   | 4  | 2 | Low-quality    | Genome-fragment | NA | 0     |
| S8_extracted_k141_40737   | 1874   | No | NA   | 0  | 2 | Not-determined | Genome-fragment | NA | 0     |
| S8_extracted_k141_179802  | 1467   | No | NA   | 0  | 0 | Not-determined | Genome-fragment | NA | 0     |
| S8_extracted_k141_48977   | 1273   | No | NA   | 0  | 2 | Not-determined | Genome-fragment | NA | 0     |
| S8_extracted_k141_48980   | 1157   | No | NA   | 0  | 1 | Not-determined | Genome-fragment | NA | 0     |
| S12_extracted_k141_187895 | 9188   | No | 7887 | 1  | 0 | Low-quality    | Genome-fragment | NA | 0.63  |
| S8_extracted_k141_205206  | 2557   | No | NA   | 0  | 1 | Not-determined | Genome-fragment | NA | 14.16 |
| S11_vs_k141_605511[full]  | 9196   | No | NA   | 0  | 0 | Low-quality    | Genome-fragment | NA | 5.98  |
| S14_vs_k141_395021[full]  | 9206   | No | NA   | 0  | 3 | Low-quality    | Genome-fragment | NA | 5.43  |
| S8_extracted_k141_153740  | 1029   | No | NA   | 0  | 1 | Not-determined | Genome-fragment | NA | 0     |
| S8_extracted_k141_5916    | 3079   | No | NA   | 0  | 8 | Not-determined | Genome-fragment | NA | 0     |
| S8_extracted_k141_66427   | 1825   | No | NA   | 0  | 0 | Not-determined | Genome-fragment | NA | 0     |
| S8_extracted_k141_91693   | 1882   | No | NA   | 0  | 0 | Not-determined | Genome-fragment | NA | 0     |
| S8_extracted_k141_194464  | 9208   | No | NA   | 0  | 6 | Low-quality    | Genome-fragment | NA | 1.22  |
| S8_extracted_k141_110212  | 1424   | No | NA   | 0  | 3 | Not-determined | Genome-fragment | NA | 0     |
| S8_extracted_k141_40768   | 1458   | No | NA   | 0  | 1 | Not-determined | Genome-fragment | NA | 0     |
| S8_extracted_k141_66444   | 2167   | No | NA   | 0  | 1 | Not-determined | Genome-fragment | NA | 0     |
| S8_extracted_k141_127330  | 1015   | No | NA   | 0  | 1 | Not-determined | Genome-fragment | NA | 0     |
| S8_extracted_k141_40776   | 1511   | No | NA   | 0  | 1 | Not-determined | Genome-fragment | NA | 0     |
| S8_extracted_k141_197033  | 3239   | No | NA   | 0  | 1 | Not-determined | Genome-fragment | NA | 0     |
| S8_extracted_k141_58323   | 1608   | No | NA   | 0  | 0 | Not-determined | Genome-fragment | NA | 0     |
| S8_extracted_k141_153777  | 1359   | No | NA   | 0  | 1 | Not-determined | Genome-fragment | NA | 0     |
| S14_vs_k141_1006071[full] | 9210   | No | NA   | 2  | 1 | Low-quality    | Genome-fragment | NA | 23.31 |
| S8_extracted_k141_170857  | 3521   | No | NA   | 0  | 6 | Not-determined | Genome-fragment | NA | 0     |
| S8_extracted_k141_40789   | 2291   | No | NA   | 0  | 0 | Not-determined | Genome-fragment | NA | 0     |
| S8_extracted_k141_144955  | 4101   | No | NA   | 0  | 3 | Not-determined | Genome-fragment | NA | 0     |
| S8_extracted_k141_92699   | 1380   | No | NA   | 0  | 1 | Not-determined | Genome-fragment | NA | 0     |
| S8_extracted_k141_153378  | 2763   | No | NA   | 0  | 1 | Not-determined | Genome-fragment | NA | 0     |
| S16_extracted_12235       | 9214   | No | NA   | 0  | 2 | Low-quality    | Genome-fragment | NA | 7.77  |
| S8_extracted_k141_161703  | 102913 | No | NA   | 25 | 3 | High-quality   | High-quality    | NA | 100   |
| S8_extracted_k141_153383  | 1189   | No | NA   | 0  | 1 | Not-determined | Genome-fragment | NA | 0     |
| S8_extracted_k141_14325   | 1051   | No | NA   | 0  | 1 | Not-determined | Genome-fragment | NA | 0     |
| S8_extracted_k141_127364  | 2388   | No | NA   | 0  | 0 | Not-determined | Genome-fragment | NA | 0     |
| S8_extracted_k141_144972  | 1059   | No | NA   | 0  | 1 | Not-determined | Genome-fragment | NA | 0     |
| S8_extracted_k141_127369  | 1407   | No | NA   | 0  | 1 | Not-determined | Genome-fragment | NA | 0     |
| S8_extracted_k141_151581  | 1058   | No | NA   | 0  | 2 | Not-determined | Genome-fragment | NA | 0     |
| S8_extracted_k141_1434    |        |    |      |    |   |                |                 |    |       |



|                           |        |     |    |    |   |                |                 |       |       |
|---------------------------|--------|-----|----|----|---|----------------|-----------------|-------|-------|
| 55_vs_k141_95239[full]    | 9259   | No  | NA | 0  | 2 | Low-quality    | Genome-fragment | 8.42  | 0     |
| 58_extracted_k141_155873  | 3361   | No  | NA | 0  | 1 | Not-determined | Genome-fragment | NA    | 0     |
| 58_extracted_k141_58429   | 1671   | No  | NA | 0  | 1 | Not-determined | Genome-fragment | NA    | 0     |
| 58_extracted_k141_66494   | 5407   | No  | NA | 0  | 3 | Not-determined | Genome-fragment | NA    | 0     |
| 58_extracted_k141_75097   | 1393   | No  | NA | 0  | 2 | Not-determined | Genome-fragment | NA    | 0     |
| 58_extracted_k141_83890   | 1117   | No  | NA | 0  | 1 | Not-determined | Genome-fragment | NA    | 0     |
| 58_extracted_k141_101124  | 1535   | No  | NA | 0  | 0 | Not-determined | Genome-fragment | NA    | 0     |
| 58_extracted_k141_6076    | 1210   | No  | NA | 0  | 2 | Not-determined | Genome-fragment | NA    | 0     |
| 514_vs_k141_74563[full]   | 5262   | No  | NA | 0  | 1 | Low-quality    | Genome-fragment | 22.34 | 0     |
| 58_extracted_k141_66505   | 3131   | No  | NA | 0  | 0 | Not-determined | Genome-fragment | NA    | 0     |
| 58_extracted_k141_153529  | 1932   | No  | NA | 0  | 2 | Not-determined | Genome-fragment | NA    | 0     |
| 58_extracted_k141_127456  | 1900   | No  | NA | 0  | 1 | Not-determined | Genome-fragment | NA    | 0     |
| 511_extracted_k141_76717  | 9272   | No  | NA | 10 | 0 | Low-quality    | Genome-fragment | 19.55 | 0     |
| 514_extracted_k141_31059  | 9279   | No  | NA | 0  | 1 | Low-quality    | Genome-fragment | 12.6  | 0     |
| 58_extracted_k141_187436  | 1190   | No  | NA | 0  | 0 | Not-determined | Genome-fragment | NA    | 0     |
| 513_vs_56915[full]        | 5280   | No  | NA | 1  | 1 | Low-quality    | Genome-fragment | 10.42 | 0     |
| 58_extracted_k141_23756   | 1536   | No  | NA | 0  | 1 | Not-determined | Genome-fragment | NA    | 0     |
| 58_extracted_k141_14434   | 1713   | No  | NA | 0  | 0 | Not-determined | Genome-fragment | NA    | 0     |
| 58_extracted_k141_70120   | 4154   | No  | NA | 0  | 2 | Not-determined | Genome-fragment | NA    | 0     |
| 58_extracted_k141_83925   | 1393   | No  | NA | 0  | 1 | Not-determined | Genome-fragment | NA    | 0     |
| 58_extracted_k141_135909  | 1058   | No  | NA | 0  | 0 | Not-determined | Genome-fragment | NA    | 0     |
| 58_extracted_k141_89928   | 1575   | No  | NA | 0  | 1 | Not-determined | Genome-fragment | NA    | 0     |
| 512_extracted_k141_168154 | 9292   | No  | NA | 2  | 0 | Low-quality    | Genome-fragment | 21.81 | 0     |
| 58_extracted_k141_75137   | 1354   | No  | NA | 0  | 2 | Not-determined | Genome-fragment | NA    | 0     |
| 58_extracted_k141_153508  | 5134   | No  | NA | 0  | 4 | Not-determined | Genome-fragment | NA    | 0     |
| 58_extracted_k141_40930   | 1725   | No  | NA | 0  | 4 | Not-determined | Genome-fragment | NA    | 0     |
| 53_vs_k141_9500[full]     | 9300   | No  | NA | 0  | 6 | Low-quality    | Genome-fragment | 5.01  | 0     |
| 53_extracted_k141_44565   | 9302   | Yes | NA | 1  | 1 | Low-quality    | Genome-fragment | 3.12  | 48.02 |
| 58_extracted_k141_179674  | 2942   | No  | NA | 1  | 1 | Not-determined | Genome-fragment | NA    | 0     |
| 58_extracted_k141_110409  | 1233   | No  | NA | 0  | 1 | Not-determined | Genome-fragment | NA    | 0     |
| 58_extracted_k141_49094   | 7272   | No  | NA | 0  | 4 | Not-determined | Genome-fragment | NA    | 0     |
| 510_vs_89977[full]        | 9303   | No  | NA | 0  | 0 | Low-quality    | Genome-fragment | 26.94 | 0     |
| 58_extracted_k141_58491   | 1778   | No  | NA | 0  | 1 | Not-determined | Genome-fragment | NA    | 0     |
| 58_extracted_k141_32285   | 1075   | No  | NA | 0  | 0 | Not-determined | Genome-fragment | NA    | 0     |
| 58_vs_k141_159613[full]   | 9303   | Yes | NA | 1  | 7 | Low-quality    | Genome-fragment | 0.56  | 91.11 |
| 58_vs_k141_200844[full]   | 9316   | No  | NA | 0  | 6 | Low-quality    | Genome-fragment | 3.14  | 0     |
| 58_extracted_k141_197123  | 1408   | No  | NA | 0  | 1 | Not-determined | Genome-fragment | NA    | 0     |
| 512_vs_k141_98769[full]   | 9320   | No  | NA | 7  | 0 | Low-quality    | Genome-fragment | 20.01 | 0     |
| 56_vs_k141_14233[full]    | 9324   | No  | NA | 0  | 0 | Low-quality    | Genome-fragment | 20.27 | 0     |
| 58_extracted_k141_23791   | 3724   | No  | NA | 0  | 2 | Not-determined | Genome-fragment | NA    | 0     |
| 55_extracted_k141_153439  | 9327   | No  | NA | 9  | 0 | Low-quality    | Genome-fragment | 19.5  | 0     |
| 58_extracted_k141_23794   | 1023   | No  | NA | 0  | 0 | Not-determined | Genome-fragment | NA    | 0     |
| 511_vs_k141_59395[full]   | 9335   | No  | NA | 1  | 0 | Low-quality    | Genome-fragment | 6.05  | 0     |
| 58_extracted_k141_118977  | 1997   | No  | NA | 0  | 0 | Not-determined | Genome-fragment | NA    | 0     |
| 58_extracted_k141_101204  | 1561   | No  | NA | 0  | 2 | Not-determined | Genome-fragment | NA    | 0     |
| 58_extracted_k141_153650  | 1410   | No  | NA | 0  | 0 | Not-determined | Genome-fragment | NA    | 0     |
| 517_extracted_k141_41935  | 9340   | No  | NA | 0  | 2 | Low-quality    | Genome-fragment | 7.3   | 0     |
| 58_extracted_k141_110467  | 1118   | No  | NA | 0  | 0 | Not-determined | Genome-fragment | NA    | 0     |
| 514_vs_k141_45012[full]   | 5943   | No  | NA | 0  | 0 | Low-quality    | Genome-fragment | 24.39 | 0     |
| 58_extracted_k141_153631  | 1491   | No  | NA | 0  | 0 | Not-determined | Genome-fragment | NA    | 0     |
| 57_vs_87122[full]         | 9351   | No  | NA | 2  | 0 | Low-quality    | Genome-fragment | 16.3  | 0     |
| 57_vs_94123[full]         | 9355   | No  | NA | 7  | 0 | Low-quality    | Genome-fragment | 3.23  | 0     |
| 58_extracted_k141_58530   | 1133   | No  | NA | 0  | 1 | Not-determined | Genome-fragment | NA    | 0     |
| 58_extracted_k141_118993  | 1068   | No  | NA | 0  | 2 | Not-determined | Genome-fragment | NA    | 0     |
| 52_vs_k141_99719[full]    | 9358   | No  | NA | 0  | 7 | Low-quality    | Genome-fragment | 15.96 | 0     |
| 58_extracted_k141_157167  | 2019   | No  | NA | 0  | 0 | Not-determined | Genome-fragment | NA    | 0     |
| 58_extracted_k141_6186    | 2039   | No  | NA | 0  | 1 | Not-determined | Genome-fragment | NA    | 0     |
| 51_extracted_k141_111291  | 9363   | No  | NA | 0  | 0 | Low-quality    | Genome-fragment | 16.52 | 0     |
| 58_extracted_k141_127601  | 1382   | No  | NA | 0  | 0 | Not-determined | Genome-fragment | NA    | 0     |
| 58_extracted_k141_58547   | 1029   | No  | NA | 0  | 1 | Not-determined | Genome-fragment | NA    | 0     |
| 58_extracted_k141_23839   | 1038   | No  | NA | 0  | 0 | Not-determined | Genome-fragment | NA    | 0     |
| 58_extracted_k141_89986   | 1030   | No  | NA | 0  | 1 | Not-determined | Genome-fragment | NA    | 0     |
| 58_extracted_k141_171020  | 1156   | No  | NA | 0  | 1 | Not-determined | Genome-fragment | NA    | 0     |
| 58_extracted_k141_145090  | 1338   | No  | NA | 0  | 1 | Not-determined | Genome-fragment | NA    | 0     |
| 58_extracted_k141_66601   | 1428   | No  | NA | 0  | 2 | Not-determined | Genome-fragment | NA    | 0     |
| 58_extracted_k141_14534   | 1197   | No  | NA | 0  | 0 | Not-determined | Genome-fragment | NA    | 0     |
| 58_extracted_k141_161937  | 1502   | No  | NA | 0  | 0 | Not-determined | Genome-fragment | NA    | 0     |
| 58_extracted_k141_49147   | 2442   | No  | NA | 0  | 0 | Not-determined | Genome-fragment | NA    | 0     |
| 58_extracted_k141_119032  | 1001   | No  | NA | 0  | 0 | Not-determined | Genome-fragment | NA    | 0     |
| 512_vs_k141_84494[full]   | 9364   | No  | NA | 4  | 0 | Low-quality    | Genome-fragment | 27.61 | 0     |
| 58_extracted_k141_92828   | 1335   | No  | NA | 0  | 0 | Not-determined | Genome-fragment | NA    | 0     |
| 58_extracted_k141_18754   | 1214   | No  | NA | 0  | 0 | Not-determined | Genome-fragment | NA    | 0     |
| 58_extracted_k141_171051  | 1512   | No  | NA | 0  | 1 | Not-determined | Genome-fragment | NA    | 0     |
| 58_extracted_k141_187552  | 1041   | No  | NA | 0  | 1 | Not-determined | Genome-fragment | NA    | 0     |
| 58_extracted_k141_66630   | 1646   | No  | NA | 0  | 1 | Not-determined | Genome-fragment | NA    | 0     |
| 58_extracted_k141_179754  | 1649   | No  | NA | 0  | 1 | Not-determined | Genome-fragment | NA    | 0     |
| 57_vs_100647[full]        | 9376   | No  | NA | 3  | 0 | Low-quality    | Genome-fragment | 17.21 | 0     |
| 58_extracted_k141_145119  | 9768   | No  | NA | 0  | 1 | Not-determined | Genome-fragment | NA    | 0     |
| 53_extracted_k141_6037    | 9379   | No  | NA | 0  | 0 | Low-quality    | Genome-fragment | 22.31 | 0     |
| 58_extracted_k141_127641  | 3741   | No  | NA | 0  | 2 | Not-determined | Genome-fragment | NA    | 0     |
| 58_extracted_k141_187557  | 1287   | No  | NA | 0  | 1 | Not-determined | Genome-fragment | NA    | 0     |
| 58_extracted_k141_171007  | 6881   | No  | NA | 0  | 0 | Not-determined | Genome-fragment | NA    | 0     |
| 58_extracted_k141_136054  | 1974   | No  | NA | 0  | 2 | Not-determined | Genome-fragment | NA    | 0     |
| 58_extracted_k141_14569   | 2232   | No  | NA | 0  | 3 | Not-determined | Genome-fragment | NA    | 0     |
| 55_vs_k141_107441[full]   | 9385   | No  | NA | 0  | 0 | Low-quality    | Genome-fragment | 37.8  | 0     |
| 517_extracted_k141_133886 | 9387   | No  | NA | 2  | 0 | Low-quality    | Genome-fragment | 19.17 | 0     |
| 58_extracted_k141_32353   | 5183   | No  | NA | 0  | 0 | Not-determined | Genome-fragment | NA    | 0     |
| 58_extracted_k141_23872   | 7461   | No  | NA | 0  | 3 | Not-determined | Genome-fragment | NA    | 0     |
| 58_extracted_k141_187580  | 1250   | No  | NA | 0  | 0 | Not-determined | Genome-fragment | NA    | 0     |
| 515_extracted_713         | 9389   | No  | NA | 0  | 2 | Low-quality    | Genome-fragment | 7.93  | 0     |
| 58_extracted_k141_153696  | 16486  | No  | NA | 6  | 0 | Medium-quality | Genome-fragment | 74.36 | 0     |
| 58_extracted_k141_134086  | 4452   | No  | NA | 0  | 0 | Not-determined | Genome-fragment | NA    | 0     |
| 58_extracted_k141_179781  | 1865   | No  | NA | 0  | 2 | Not-determined | Genome-fragment | NA    | 0     |
| 58_extracted_k141_197247  | 1203   | No  | NA | 0  | 0 | Not-determined | Genome-fragment | NA    | 0     |
| 58_extracted_k141_110523  | 1376   | No  | NA | 0  | 1 | Not-determined | Genome-fragment | NA    | 0     |
| 58_extracted_k141_101283  | 32334  | No  | NA | 17 | 0 | Medium-quality | Genome-fragment | 58.69 | 0     |
| 58_extracted_k141_14586   | 1167   | No  | NA | 0  | 1 | Not-determined | Genome-fragment | NA    | 0     |
| 58_extracted_k141_153985  | 1551   | No  | NA | 0  | 0 | Not-determined | Genome-fragment | NA    | 0     |
| 58_extracted_k141_127664  | 5749   | No  | NA | 0  | 0 | Not-determined | Genome-fragment | NA    | 0     |
| 51_vs_k141_56304[full]    | 9390   | No  | NA | 3  | 0 | Low-quality    | Genome-fragment | 15.7  | 0     |
| 58_extracted_k141_162002  | 1135   | No  | NA | 0  | 1 | Not-determined | Genome-fragment | NA    | 0     |
| 58_extracted_k141_205393  | 8146   | No  | NA | 0  | 0 | Not-determined | Genome-fragment | NA    | 0     |
| 58_extracted_k141_23914   | 2948   | No  | NA | 0  | 0 | Not-determined | Genome-fragment | NA    | 0     |
| 58_extracted_k141_197286  | 1084   | No  | NA | 0  | 1 | Not-determined | Genome-fragment | NA    | 0     |
| 58_extracted_k141_197288  | 2409   | No  | NA | 0  | 2 | Not-determined | Genome-fragment | NA    | 0     |
| 58_extracted_k141_197297  | 1699   | No  | NA | 0  | 1 | Not-determined | Genome-fragment | NA    | 0     |
| 58_extracted_k141_136125  | 5750   | No  | NA | 0  | 3 | Not-determined | Genome-fragment | NA    | 0     |
| 512_extracted_k141_14286  | 9390   | Yes | NA | 1  | 1 | Low-quality    | Genome-fragment | 19.42 | 18.12 |
| 58_extracted_k141_14641   | 1210   | No  | NA | 0  | 0 | Not-determined | Genome-fragment | NA    | 0     |
| 58_extracted_k141_110589  | 3068   | No  | NA | 0  | 0 | Not-determined | Genome-fragment | NA    | 0     |
| 58_extracted_k141_6312    | 1414   | No  | NA | 0  | 1 | Not-determined | Genome-fragment | NA    | 0     |
| 58_extracted_k141_179845  | 1012   | No  | NA | 0  | 1 | Not-determined | Genome-fragment | NA    | 0     |
| 513_vs_56005[full]        | 9399   | No  | NA | 0  | 2 | Low-quality    | Genome-fragment | 8.51  | 0     |
| 513_extracted_79387       | 9408   | No  | NA | 3  | 0 | Low-quality    | Genome-fragment | 17.2  | 0     |
| 516_vs_172343[full]       | 9408   | No  | NA | 1  | 2 | Low-quality    | Genome-fragment | 6.82  | 0     |
| 58_extracted_k141_101339  | 3421   | No  | NA | 0  | 3 | Not-determined | Genome-fragment | NA    | 0     |
| 58_extracted_k141_136136  | 1045   | No  | NA | 0  | 0 | Not-determined | Genome-fragment | NA    | 0     |
| 58_extracted_k141_75400   | 12035  | No  | NA | 0  | 2 | Not-determined | Genome-fragment | NA    | 0     |
| 58_extracted_k141_179858  | 1018   | No  | NA | 0  | 1 | Not-determined | Genome-fragment | NA    | 0     |
| 58_extracted_k141_6342    | 1750   | No  | NA | 0  | 2 | Not-determined | Genome-fragment | NA    | 0     |
| 58_extracted_k141_162063  | 1091   | No  | NA | 0  | 0 | Not-determined | Genome-fragment | NA    | 0     |
| 58_extracted_k141_171178  | 1235   | No  | NA | 0  | 1 | Not-determined | Genome-fragment | NA    | 0     |
| 58_extracted_k141_187644  | 1794   | No  | NA | 0  | 0 | Not-determined | Genome-fragment | NA    | 0     |
| 516_vs_12812[full]        | 9411   | No  | NA | 4  | 0 | Low-quality    | Genome-fragment | 21.41 | 0     |
| 58_extracted_k141_110624  | 1377   | No  | NA | 0  | 1 | Not-determined | Genome-fragment | NA    | 0     |
| 58_extracted_k141_136148  | 3017   | No  | NA | 0  | 2 | Not-determined | Genome-fragment | NA    | 0     |
| 55_vs_k141_1215[full]     | 9412   | No  | NA | 2  | 0 | Low-quality    | Genome-fragment | 7.35  | 0     |
| 58_extracted_18320        | 9418   | No  | NA | 0  | 0 | Low-quality    | Genome-fragment | 10.1  | 0     |
| 58_extracted_k141_58742   | 1153   | No  | NA | 0  | 1 | Not-determined | Genome-fragment | NA    | 0     |
| 58_extracted_k141_205464  | 4179   | No  | NA | 0  | 2 | Not-determined | Genome-fragment | NA    | 0     |
| 58_extracted_k141_58758   | 3044   | No  | NA | 0  | 3 | Not-determined | Genome-fragment | NA    | 0     |
| 58_extracted_k141_119156  | 1013   | No  | NA | 0  | 1 | Not-determined | Genome-fragment | NA    | 0     |
| 58_extracted_k141_93002   | 1160   | No  | NA | 0  | 0 | Not-determined | Genome-fragment | NA    | 0     |
| 517_extracted_k141_34002  | 9419   | No  | NA | 1  | 1 | Low-quality    | Genome-fragment | 11.61 | 0     |
| 58_extracted_k141_179932  | 1021   | No  | NA | 0  | 0 | Not-determined | Genome-fragment | NA    | 0     |
| 58_extracted_k141_93015   | 1290   | No  | NA | 0  | 1 | Not-determined | Genome-fragment | NA    | 0     |
| 58_extracted_k141_162087  | 1109   | No  | NA | 0  | 1 | Not-determined | Genome-fragment | NA    | 0     |
| 58_extracted_k141_14708   | 2536   | No  | NA | 0  | 0 | Not-determined | Genome-fragment | NA    | 0     |
| 58_extracted_k141_6405    | 1229   | No  | NA | 0  | 2 | Not-determined | Genome-fragment | NA    | 0     |
| 58_extracted_k141_119179  | 1110   | No  | NA | 0  | 0 | Not-determined | Genome-fragment | NA    | 0     |
| 58_extracted_k141_66753   | 1280   | No  | NA | 0  | 2 | Not-determined | Genome-fragment | NA    | 0     |
| 58_extracted_k141_162100  | 1156   | No  | NA | 0  | 2 | Not-determined | Genome-fragment | NA    | 0     |
| 58_extracted_k141_153861  | 1295   | No  | NA | 0  | 1 | Not-determined | Genome-fragment | NA    | 0     |
| 58_extracted_k141_14720   | 3959</ |     |    |    |   |                |                 |       |       |



|                           |        |     |      |    |   |                |                 |       |       |
|---------------------------|--------|-----|------|----|---|----------------|-----------------|-------|-------|
| S8_extracted_k141_93103   | 2125   | No  | NA   | 0  | 2 | Not-determined | Genome-fragment | NA    | 0     |
| S8_extracted_k141_180031  | 2066   | No  | NA   | 0  | 1 | Not-determined | Genome-fragment | NA    | 0     |
| S8_extracted_k141_110741  | 8633   | No  | NA   | 0  | 1 | Not-determined | Genome-fragment | NA    | 0     |
| S8_extracted_k141_58907   | 1060   | No  | NA   | 0  | 0 | Not-determined | Genome-fragment | NA    | 0     |
| S8_extracted_k141_41193   | 2135   | No  | NA   | 0  | 2 | Not-determined | Genome-fragment | NA    | 0     |
| S8_extracted_k141_136250  | 7585   | No  | NA   | 0  | 3 | Not-determined | Genome-fragment | NA    | 0     |
| S8_extracted_k141_119261  | 1206   | No  | NA   | 0  | 2 | Not-determined | Genome-fragment | NA    | 0     |
| S10_extracted_44931       | 9436   | No  | NA   | 0  | 0 | Low-quality    | Genome-fragment | 5.78  | 0     |
| S3_extracted_k141_53325   | 9442   | No  | NA   | 0  | 1 | Low-quality    | Genome-fragment | 23.44 | 0     |
| S5_vs_k141_85031  full    | 9445   | No  | NA   | 6  | 0 | Low-quality    | Genome-fragment | 10.96 | 0     |
| S8_extracted_k141_14814   | 1200   | No  | NA   | 0  | 2 | Not-determined | Genome-fragment | NA    | 0     |
| S8_extracted_k141_75549   | 1015   | No  | NA   | 0  | 2 | Not-determined | Genome-fragment | NA    | 0     |
| S8_extracted_k141_145312  | 1076   | No  | NA   | 0  | 1 | Not-determined | Genome-fragment | NA    | 0     |
| S16_vs_87197  full        | 9446   | No  | NA   | 6  | 1 | Low-quality    | Genome-fragment | 11.72 | 0     |
| S8_extracted_k141_136274  | 1362   | No  | NA   | 0  | 0 | Not-determined | Genome-fragment | NA    | 0     |
| S8_extracted_k141_14834   | 3463   | No  | NA   | 0  | 1 | Not-determined | Genome-fragment | NA    | 0     |
| S8_extracted_k141_75566   | 1301   | No  | NA   | 0  | 0 | Not-determined | Genome-fragment | NA    | 0     |
| S8_extracted_k141_84290   | 2127   | No  | NA   | 0  | 1 | Not-determined | Genome-fragment | NA    | 0     |
| S8_extracted_k141_56861   | 6204   | No  | NA   | 0  | 1 | Not-determined | Genome-fragment | NA    | 0     |
| S8_extracted_k141_14838   | 4844   | No  | NA   | 0  | 2 | Not-determined | Genome-fragment | NA    | 0     |
| S8_extracted_k141_14844   | 1609   | No  | NA   | 0  | 2 | Not-determined | Genome-fragment | NA    | 0     |
| S8_extracted_k141_119319  | 1549   | No  | NA   | 0  | 0 | Not-determined | Genome-fragment | NA    | 0     |
| S8_extracted_k141_24017   | 1126   | No  | NA   | 0  | 1 | Not-determined | Genome-fragment | NA    | 0     |
| S8_extracted_k141_205627  | 4117   | No  | NA   | 0  | 2 | Not-determined | Genome-fragment | NA    | 0     |
| S14_vs_k141_77511  full   | 9447   | No  | NA   | 2  | 0 | Low-quality    | Genome-fragment | 27.59 | 0     |
| S8_extracted_k141_117827  | 4626   | No  | NA   | 0  | 3 | Not-determined | Genome-fragment | NA    | 0     |
| S8_extracted_k141_24027   | 3790   | No  | NA   | 0  | 1 | Not-determined | Genome-fragment | NA    | 0     |
| S8_extracted_k141_101596  | 1186   | No  | NA   | 0  | 1 | Not-determined | Genome-fragment | NA    | 0     |
| S8_extracted_k141_145351  | 3301   | No  | NA   | 0  | 1 | Not-determined | Genome-fragment | NA    | 0     |
| S8_extracted_k141_136302  | 1350   | No  | NA   | 0  | 0 | Not-determined | Genome-fragment | NA    | 0     |
| S8_extracted_k141_153993  | 1035   | No  | NA   | 0  | 1 | Not-determined | Genome-fragment | NA    | 0     |
| S8_extracted_k141_110831  | 1011   | No  | NA   | 0  | 0 | Not-determined | Genome-fragment | NA    | 0     |
| S7_vs_65641  full         | 9451   | No  | NA   | 9  | 0 | Low-quality    | Genome-fragment | 27.04 | 0     |
| S8_extracted_k141_93193   | 1932   | No  | NA   | 0  | 1 | Not-determined | Genome-fragment | NA    | 0     |
| S8_extracted_k141_93197   | 1285   | No  | NA   | 0  | 1 | Not-determined | Genome-fragment | NA    | 0     |
| S8_extracted_k141_14914   | 3172   | No  | NA   | 0  | 1 | Not-determined | Genome-fragment | NA    | 0     |
| S7_vs_116644  full        | 9453   | No  | NA   | 3  | 0 | Low-quality    | Genome-fragment | 22.76 | 0     |
| S8_extracted_k141_101627  | 1420   | No  | NA   | 0  | 1 | Not-determined | Genome-fragment | NA    | 0     |
| S8_extracted_k141_13634   | 2548   | No  | NA   | 0  | 2 | Not-determined | Genome-fragment | NA    | 0     |
| S8_extracted_k141_24074   | 1048   | No  | NA   | 0  | 1 | Not-determined | Genome-fragment | NA    | 0     |
| S8_extracted_k141_41252   | 1624   | No  | NA   | 0  | 2 | Not-determined | Genome-fragment | NA    | 0     |
| S8_extracted_k141_21232   | 9453   | No  | NA   | 0  | 1 | Low-quality    | Genome-fragment | 6.03  | 0     |
| S8_extracted_k141_24080   | 1337   | No  | NA   | 0  | 2 | Not-determined | Genome-fragment | NA    | 0     |
| S8_extracted_k141_187742  | 116996 | No  | NA   | 27 | 3 | High-quality   | High-quality    | 94.41 | 0     |
| S8_extracted_k141_93222   | 1291   | No  | NA   | 0  | 1 | Not-determined | Genome-fragment | NA    | 0     |
| S8_extracted_k141_154060  | 1054   | No  | NA   | 0  | 2 | Not-determined | Genome-fragment | NA    | 0     |
| S8_extracted_k141_24088   | 1373   | No  | NA   | 0  | 1 | Not-determined | Genome-fragment | NA    | 0     |
| S8_extracted_k141_6596    | 3024   | No  | NA   | 0  | 0 | Not-determined | Genome-fragment | NA    | 0     |
| S8_extracted_k141_162247  | 1081   | No  | NA   | 0  | 1 | Not-determined | Genome-fragment | NA    | 0     |
| S8_extracted_k141_154051  | 1671   | No  | NA   | 0  | 3 | Not-determined | Genome-fragment | NA    | 0     |
| S8_extracted_k141_136354  | 1617   | No  | NA   | 0  | 2 | Not-determined | Genome-fragment | NA    | 0     |
| S8_extracted_k141_136362  | 1020   | No  | NA   | 0  | 0 | Not-determined | Genome-fragment | NA    | 0     |
| S8_extracted_k141_59009   | 1248   | No  | NA   | 0  | 0 | Not-determined | Genome-fragment | NA    | 0     |
| S8_extracted_k141_75674   | 1036   | No  | NA   | 0  | 1 | Not-determined | Genome-fragment | NA    | 0     |
| S8_extracted_k141_1076245 | 1036   | No  | NA   | 0  | 6 | Not-determined | Genome-fragment | NA    | 0     |
| S8_extracted_k141_180070  | 1359   | No  | NA   | 0  | 0 | Not-determined | Genome-fragment | NA    | 0     |
| S8_extracted_k141_49282   | 99212  | No  | NA   | 14 | 1 | High-quality   | High-quality    | 99.74 | 0     |
| S8_extracted_k141_32714   | 1208   | No  | NA   | 0  | 1 | Not-determined | Genome-fragment | NA    | 0     |
| S8_extracted_k141_162252  | 1207   | No  | NA   | 0  | 0 | Not-determined | Genome-fragment | NA    | 0     |
| S14_vs_k141_5965  full    | 9455   | No  | NA   | 1  | 2 | Low-quality    | Genome-fragment | 6.81  | 0     |
| S8_extracted_k141_24124   | 3453   | No  | NA   | 0  | 3 | Not-determined | Genome-fragment | NA    | 0     |
| S8_extracted_k141_14984   | 9931   | No  | NA   | 0  | 6 | Not-determined | Genome-fragment | NA    | 0     |
| S7_extracted_47374        | 9455   | No  | NA   | 0  | 6 | Low-quality    | Genome-fragment | 3.98  | 0     |
| S8_extracted_k141_171484  | 1270   | No  | NA   | 0  | 1 | Not-determined | Genome-fragment | NA    | 0     |
| S8_extracted_k141_136418  | 1609   | No  | NA   | 0  | 0 | Not-determined | Genome-fragment | NA    | 0     |
| S8_extracted_k141_136424  | 2586   | No  | NA   | 0  | 1 | Not-determined | Genome-fragment | NA    | 0     |
| S8_extracted_k141_162292  | 4718   | No  | NA   | 0  | 5 | Not-determined | Genome-fragment | NA    | 0     |
| S8_extracted_k141_101730  | 1132   | No  | NA   | 0  | 2 | Not-determined | Genome-fragment | NA    | 0     |
| S8_extracted_k141_6664    | 5127   | No  | NA   | 0  | 1 | Not-determined | Genome-fragment | NA    | 0     |
| S8_extracted_k141_180247  | 3271   | No  | NA   | 0  | 1 | Not-determined | Genome-fragment | NA    | 0     |
| S3_vs_k141_42463  full    | 9460   | No  | NA   | 2  | 0 | Low-quality    | Genome-fragment | 19.66 | 0     |
| S5_vs_k141_4161  full     | 9463   | No  | NA   | 1  | 1 | Low-quality    | Genome-fragment | 5.95  | 0     |
| S8_extracted_k141_101737  | 1262   | No  | NA   | 0  | 1 | Not-determined | Genome-fragment | NA    | 0     |
| S16_extracted_36476       | 9465   | No  | NA   | 0  | 4 | Low-quality    | Genome-fragment | 2.92  | 0     |
| S8_extracted_k141_67052   | 2502   | No  | NA   | 0  | 2 | Not-determined | Genome-fragment | NA    | 0     |
| S8_extracted_k141_205790  | 3575   | No  | NA   | 0  | 2 | Not-determined | Genome-fragment | NA    | 0     |
| S8_extracted_k141_59087   | 1497   | No  | NA   | 0  | 0 | Not-determined | Genome-fragment | NA    | 0     |
| S8_extracted_k141_93271   | 1652   | No  | NA   | 0  | 1 | Not-determined | Genome-fragment | NA    | 0     |
| S8_extracted_k141_70760   | 1140   | No  | NA   | 0  | 0 | Not-determined | Genome-fragment | NA    | 0     |
| S8_extracted_k141_197700  | 1163   | No  | NA   | 0  | 0 | Not-determined | Genome-fragment | NA    | 0     |
| S8_extracted_k141_32781   | 1210   | No  | NA   | 0  | 2 | Not-determined | Genome-fragment | NA    | 0     |
| S8_extracted_k141_70762   | 1078   | No  | NA   | 0  | 0 | Not-determined | Genome-fragment | NA    | 0     |
| S14_extracted_k141_105385 | 9477   | No  | NA   | 2  | 0 | Low-quality    | Genome-fragment | 12    | 0     |
| S8_extracted_k141_24177   | 8473   | No  | NA   | 0  | 4 | Not-determined | Genome-fragment | NA    | 0     |
| S8_extracted_k141_75773   | 1706   | No  | NA   | 0  | 1 | Not-determined | Genome-fragment | NA    | 0     |
| S8_extracted_k141_93279   | 5643   | No  | NA   | 0  | 1 | Not-determined | Genome-fragment | NA    | 0     |
| S8_extracted_k141_84489   | 2771   | No  | NA   | 0  | 2 | Not-determined | Genome-fragment | NA    | 0     |
| S6_vs_k141_2590  full     | 9480   | No  | NA   | 0  | 1 | Low-quality    | Genome-fragment | 33.93 | 0     |
| S8_extracted_k141_65406   | 9480   | No  | NA   | 0  | 1 | Low-quality    | Genome-fragment | 5.95  | 0     |
| S8_extracted_k141_67084   | 2062   | No  | NA   | 0  | 1 | Not-determined | Genome-fragment | NA    | 0     |
| S8_extracted_k141_180301  | 3063   | No  | NA   | 0  | 1 | Not-determined | Genome-fragment | NA    | 0     |
| S8_extracted_k141_24201   | 2373   | No  | NA   | 0  | 1 | Not-determined | Genome-fragment | NA    | 0     |
| S8_extracted_k141_171574  | 1108   | No  | NA   | 0  | 1 | Not-determined | Genome-fragment | NA    | 0     |
| S8_extracted_k141_110854  | 1011   | No  | NA   | 0  | 1 | Not-determined | Genome-fragment | NA    | 0     |
| S8_extracted_k141_75801   | 8652   | No  | NA   | 0  | 1 | Not-determined | Genome-fragment | NA    | 0     |
| S8_extracted_k141_24205   | 1174   | No  | NA   | 0  | 1 | Not-determined | Genome-fragment | NA    | 0     |
| S8_extracted_k141_128091  | 10082  | No  | NA   | 0  | 1 | Not-determined | Genome-fragment | NA    | 0     |
| S8_extracted_k141_187838  | 1629   | No  | NA   | 0  | 1 | Not-determined | Genome-fragment | NA    | 0     |
| S8_extracted_k141_187846  | 1608   | No  | NA   | 0  | 1 | Not-determined | Genome-fragment | NA    | 0     |
| S17_vs_k141_140244  full  | 9492   | No  | NA   | 0  | 1 | Low-quality    | Genome-fragment | 2.37  | 0     |
| S8_extracted_k141_187847  | 1169   | No  | NA   | 0  | 1 | Not-determined | Genome-fragment | NA    | 0     |
| S11_vs_k141_20790  full   | 9493   | Yes | 5809 | 0  | 1 | Low-quality    | Genome-fragment | 6.11  | 38.81 |
| S8_extracted_k141_6732    | 2188   | No  | NA   | 0  | 1 | Not-determined | Genome-fragment | NA    | 0     |
| S8_extracted_k141_145565  | 1364   | No  | NA   | 0  | 1 | Not-determined | Genome-fragment | NA    | 0     |
| S8_extracted_k141_24226   | 1047   | No  | NA   | 0  | 1 | Not-determined | Genome-fragment | NA    | 0     |
| S8_extracted_k141_110886  | 1149   | No  | NA   | 0  | 2 | Not-determined | Genome-fragment | NA    | 0     |
| S3_extracted_k141_2158    | 9505   | No  | NA   | 3  | 0 | Low-quality    | Genome-fragment | 5.65  | 0     |
| S16_vs_1585  full         | 9507   | No  | NA   | 1  | 2 | Low-quality    | Genome-fragment | 12.26 | 0     |
| S8_extracted_k141_67128   | 1277   | No  | NA   | 0  | 1 | Not-determined | Genome-fragment | NA    | 0     |
| S8_extracted_k141_171629  | 3345   | No  | NA   | 0  | 3 | Not-determined | Genome-fragment | NA    | 0     |
| S4_extracted_22016        | 9508   | No  | NA   | 0  | 4 | Low-quality    | Genome-fragment | 5.97  | 0     |
| S8_extracted_k141_151211  | 1684   | No  | NA   | 0  | 0 | Not-determined | Genome-fragment | NA    | 0     |
| S8_extracted_k141_49410   | 6195   | No  | NA   | 0  | 3 | Not-determined | Genome-fragment | NA    | 0     |
| S8_extracted_k141_119454  | 22223  | No  | NA   | 0  | 4 | Not-determined | Genome-fragment | NA    | 0     |
| S8_extracted_k141_49411   | 3989   | No  | NA   | 0  | 1 | Not-determined | Genome-fragment | NA    | 0     |
| S8_extracted_k141_187888  | 1470   | No  | NA   | 0  | 0 | Not-determined | Genome-fragment | NA    | 0     |
| S8_extracted_k141_24262   | 1376   | No  | NA   | 0  | 1 | Not-determined | Genome-fragment | NA    | 0     |
| S8_extracted_k141_15042   | 1402   | No  | NA   | 0  | 1 | Not-determined | Genome-fragment | NA    | 0     |
| S8_extracted_k141_59184   | 1654   | No  | NA   | 0  | 0 | Not-determined | Genome-fragment | NA    | 0     |
| S16_vs_50088  full        | 9512   | Yes | 3976 | 2  | 2 | Low-quality    | Genome-fragment | 2.72  | 58.2  |
| S8_extracted_k141_136330  | 3464   | No  | NA   | 0  | 2 | Not-determined | Genome-fragment | NA    | 0     |
| S8_extracted_k141_6770    | 1120   | No  | NA   | 0  | 0 | Not-determined | Genome-fragment | NA    | 0     |
| S8_extracted_k141_197795  | 1020   | No  | NA   | 0  | 0 | Not-determined | Genome-fragment | NA    | 0     |
| S8_extracted_k141_128144  | 2148   | No  | NA   | 0  | 2 | Not-determined | Genome-fragment | NA    | 0     |
| S8_extracted_k141_136527  | 1494   | No  | NA   | 0  | 2 | Not-determined | Genome-fragment | NA    | 0     |
| S12_vs_k141_89306  full   | 9518   | No  | NA   | 0  | 3 | Low-quality    | Genome-fragment | 19.64 | 0     |
| S8_extracted_k141_101900  | 1399   | No  | NA   | 0  | 1 | Not-determined | Genome-fragment | NA    | 0     |
| S13_vs_4752  full         | 9516   | No  | NA   | 0  | 8 | Low-quality    | Genome-fragment | 4.52  | 0     |
| S8_extracted_k141_59230   | 1147   | No  | NA   | 0  | 2 | Not-determined | Genome-fragment | NA    | 0     |
| S8_extracted_k141_101927  | 1299   | No  | NA   | 0  | 1 | Not-determined | Genome-fragment | NA    | 0     |
| S10_vs_21073  full        | 9530   | No  | NA   | 0  | 2 | Low-quality    | Genome-fragment | 18.43 | 0     |
| S8_extracted_k141_145637  | 4338   | No  | NA   | 0  | 4 | Not-determined | Genome-fragment | NA    | 0     |
| S8_extracted_k141_128183  | 1140   | No  | NA   | 0  | 1 | Not-determined | Genome-fragment | NA    | 0     |
| S8_extracted_k141_101930  | 1109   | No  | NA   | 0  | 2 | Not-determined | Genome-fragment | NA    | 0     |
| S8_extracted_k141_119486  | 9177   | No  | NA   | 0  | 3 | Not-determined | Genome-fragment | NA    | 0     |
| S8_extracted_k141_49438   | 1161   | No  | NA   | 0  | 1 | Not-determined | Genome-fragment | NA    | 0     |
| S8_extracted_k141_119495  | 1071   | No  | NA   | 0  | 1 | Not-determined | Genome-fragment | NA    | 0     |
| S8_extracted_k141_171711  | 1058   | No  | NA   | 0  | 0 | Not-determined | Genome-fragment | NA    | 0     |
| S8_extracted_k141_6823    | 1901   | No  | NA   | 0  | 1 | Not-determined | Genome-fragment | NA    | 0     |
| S8_extracted_k141_24330   | 1717   | No  | NA   | 0  | 1 | Not-determined | Genome-fragment | NA    | 0     |
| S16_extracted_2123        | 9548   | No  | NA   | 4  | 0 | Low-quality    | Genome-fragment | 25.02 | 0     |
| S8_extracted_k141_171726  | 2688   | No  | NA   | 0  | 2 | Not-determined | Genome-fragment | NA    | 0     |
| S8_vs_k141_74331  full    | 9554   | No  | NA   | 1  | 2 | Low-quality    | Genome-fragment | 23.57 | 0     |
| S8_extracted_k141_136585  | 1095   | No  | NA   | 0  | 1 | Not-determined | Genome-fragment | NA    | 0     |
| S11_vs_k141_30223  full   | 9555   | No  | NA   | 1  | 0 | Low-quality    | Genome-fragment | 23.44 | 0     |
| S8_extracted_k141_110935  | 1752   | No  | NA   | 0  | 0 | Not-determined | Genome-fragment | NA    | 0     |
| S8_extracted_k141_101957  | 2042   | No  | NA   | 0  | 0 | Not-determined | Genome-fragment | NA    | 0     |
| S8_extracted_k141_16249   | 747    |     |      |    |   |                |                 |       |       |



|                           |       |     |    |      |   |                |                 |       |       |
|---------------------------|-------|-----|----|------|---|----------------|-----------------|-------|-------|
| S8_extracted_k141_15218   | 3140  | No  | NA | 0    | 1 | Not-determined | Genome-fragment | NA    | 0     |
| S14_vs_k141_53444[full]   | 9575  | No  | NA | 7    | 0 | Low-quality    | Genome-fragment | 25.65 | 0     |
| S8_extracted_k141_84791   | 2121  | No  | NA | 0    | 2 | Not-determined | Genome-fragment | NA    | 0     |
| S8_extracted_k141_41376   | 61698 | No  | NA | 31   | 1 | High-quality   | High-quality    | 99.72 | 0     |
| S8_extracted_k141_67235   | 2819  | No  | NA | 0    | 1 | Not-determined | Genome-fragment | NA    | 0     |
| S5_vs_k141_63846[full]    | 9582  | No  | NA | 11   | 0 | Low-quality    | Genome-fragment | 32.02 | 0     |
| S8_extracted_k141_93454   | 2475  | No  | NA | 0    | 2 | Not-determined | Genome-fragment | NA    | 0     |
| S5_vs_k141_30484[full]    | 9584  | Yes | NA | 1957 | 1 | Low-quality    | Genome-fragment | 2.96  | 79.58 |
| S8_extracted_k141_67246   | 1458  | No  | NA | 0    | 2 | Not-determined | Genome-fragment | NA    | 0     |
| S8_extracted_k141_188050  | 1840  | No  | NA | 0    | 3 | Not-determined | Genome-fragment | NA    | 0     |
| S8_vs_k141_58336[full]    | 9601  | Yes | NA | 6729 | 1 | Low-quality    | Genome-fragment | 4.11  | 29.91 |
| S8_extracted_k141_102030  | 6491  | No  | NA | 0    | 2 | Not-determined | Genome-fragment | NA    | 0     |
| S8_extracted_k141_93470   | 1471  | No  | NA | 0    | 2 | Not-determined | Genome-fragment | NA    | 0     |
| S8_extracted_k141_162572  | 1535  | No  | NA | 0    | 2 | Not-determined | Genome-fragment | NA    | 0     |
| S8_extracted_k141_205918  | 1266  | No  | NA | 0    | 0 | Not-determined | Genome-fragment | NA    | 0     |
| S8_extracted_k141_31957   | 1044  | No  | NA | 0    | 1 | Not-determined | Genome-fragment | NA    | 0     |
| S8_extracted_k141_205925  | 1123  | No  | NA | 0    | 1 | Not-determined | Genome-fragment | NA    | 0     |
| S8_extracted_k141_128310  | 6301  | No  | NA | 0    | 5 | Not-determined | Genome-fragment | NA    | 0     |
| S8_extracted_k141_136608  | 12264 | No  | NA | 0    | 7 | Not-determined | Genome-fragment | NA    | 0     |
| S8_extracted_k141_197947  | 4462  | No  | NA | 0    | 3 | Not-determined | Genome-fragment | NA    | 0     |
| S17_vs_k141_14017[full]   | 9602  | No  | NA | 3    | 0 | Low-quality    | Genome-fragment | 13.8  | 0     |
| S8_extracted_k141_188081  | 1706  | No  | NA | 0    | 1 | Not-determined | Genome-fragment | NA    | 0     |
| S8_extracted_k141_188089  | 1706  | No  | NA | 0    | 1 | Not-determined | Genome-fragment | NA    | 0     |
| S8_extracted_k141_171856  | 1067  | No  | NA | 0    | 0 | Not-determined | Genome-fragment | NA    | 0     |
| S8_extracted_k141_111089  | 1329  | No  | NA | 0    | 2 | Not-determined | Genome-fragment | NA    | 0     |
| S8_extracted_k141_41439   | 2249  | No  | NA | 0    | 1 | Not-determined | Genome-fragment | NA    | 0     |
| S8_extracted_k141_102090  | 1073  | No  | NA | 0    | 0 | Not-determined | Genome-fragment | NA    | 0     |
| S8_extracted_k141_171866  | 3173  | No  | NA | 0    | 4 | Not-determined | Genome-fragment | NA    | 0     |
| S16_extracted_45905       | 9615  | No  | NA | 0    | 0 | Low-quality    | Genome-fragment | 15.93 | 0     |
| S8_extracted_k141_93520   | 1197  | No  | NA | 0    | 0 | Not-determined | Genome-fragment | NA    | 0     |
| S8_extracted_k141_76083   | 1762  | No  | NA | 0    | 0 | Not-determined | Genome-fragment | NA    | 0     |
| S8_extracted_k141_41456   | 1857  | No  | NA | 0    | 1 | Not-determined | Genome-fragment | NA    | 0     |
| S8_extracted_k141_180549  | 7584  | No  | NA | 0    | 5 | Not-determined | Genome-fragment | NA    | 0     |
| S11_extracted_k141_138247 | 9627  | No  | NA | 1    | 1 | Low-quality    | Genome-fragment | 16.47 | 0     |
| S12_extracted_k141_126532 | 9635  | No  | NA | 1    | 0 | Low-quality    | Genome-fragment | 3.43  | 0     |
| S8_extracted_k141_50482   | 1429  | No  | NA | 0    | 2 | Not-determined | Genome-fragment | NA    | 0     |
| S8_extracted_k141_33001   | 5967  | No  | NA | 0    | 1 | Not-determined | Genome-fragment | NA    | 0     |
| S8_extracted_k141_49662   | 2300  | No  | NA | 0    | 2 | Not-determined | Genome-fragment | NA    | 0     |
| S8_extracted_k141_33009   | 1392  | No  | NA | 0    | 0 | Not-determined | Genome-fragment | NA    | 0     |
| S8_extracted_k141_145851  | 1039  | No  | NA | 0    | 1 | Not-determined | Genome-fragment | NA    | 0     |
| S8_vs_k141_111707[full]   | 9642  | No  | NA | 3    | 0 | Low-quality    | Genome-fragment | 23.18 | 0     |
| S8_extracted_k141_136775  | 1285  | No  | NA | 0    | 2 | Not-determined | Genome-fragment | NA    | 0     |
| S8_extracted_k141_67328   | 3482  | No  | NA | 0    | 0 | Not-determined | Genome-fragment | NA    | 0     |
| S8_extracted_k141_136777  | 1464  | No  | NA | 0    | 1 | Not-determined | Genome-fragment | NA    | 0     |
| S8_extracted_k141_180583  | 8864  | No  | NA | 0    | 2 | Not-determined | Genome-fragment | NA    | 0     |
| S8_extracted_k141_15251   | 1791  | No  | NA | 0    | 2 | Not-determined | Genome-fragment | NA    | 0     |
| S8_extracted_k141_206009  | 1105  | No  | NA | 0    | 1 | Not-determined | Genome-fragment | NA    | 0     |
| S8_extracted_k141_198048  | 1273  | No  | NA | 0    | 1 | Not-determined | Genome-fragment | NA    | 0     |
| S8_vs_k141_148609[full]   | 9644  | No  | NA | 0    | 0 | Low-quality    | Genome-fragment | 12.52 | 0     |
| S8_extracted_k141_180589  | 1450  | No  | NA | 0    | 1 | Not-determined | Genome-fragment | NA    | 0     |
| S8_extracted_k141_76149   | 1896  | No  | NA | 0    | 0 | Not-determined | Genome-fragment | NA    | 0     |
| S8_extracted_k141_145878  | 1567  | No  | NA | 0    | 0 | Not-determined | Genome-fragment | NA    | 0     |
| S8_extracted_k141_136820  | 1103  | No  | NA | 0    | 2 | Not-determined | Genome-fragment | NA    | 0     |
| S8_extracted_k141_180606  | 1389  | No  | NA | 0    | 1 | Not-determined | Genome-fragment | NA    | 0     |
| S8_extracted_k141_76153   | 1255  | No  | NA | 0    | 1 | Not-determined | Genome-fragment | NA    | 0     |
| S8_extracted_k141_41463   | 6805  | No  | NA | 0    | 3 | Not-determined | Genome-fragment | NA    | 0     |
| S8_extracted_k141_119639  | 1000  | No  | NA | 0    | 1 | Not-determined | Genome-fragment | NA    | 0     |
| S16_extracted_3526        | 9646  | No  | NA | 0    | 2 | Low-quality    | Genome-fragment | 15.6  | 0     |
| S8_extracted_k141_180602  | 2270  | No  | NA | 0    | 2 | Not-determined | Genome-fragment | NA    | 0     |
| S16_extracted_114153      | 9652  | No  | NA | 0    | 3 | Low-quality    | Genome-fragment | 11.37 | 0     |
| S8_extracted_k141_115649  | 2054  | No  | NA | 0    | 0 | Not-determined | Genome-fragment | NA    | 0     |
| S8_extracted_k141_162609  | 2288  | No  | NA | 0    | 2 | Not-determined | Genome-fragment | NA    | 0     |
| S5_vs_k141_61861[full]    | 9653  | No  | NA | 3    | 0 | Low-quality    | Genome-fragment | 24.91 | 0     |
| S8_extracted_k141_6981    | 4239  | No  | NA | 0    | 1 | Not-determined | Genome-fragment | NA    | 0     |
| S8_extracted_k141_119657  | 5853  | No  | NA | 4    | 1 | Not-determined | Genome-fragment | NA    | 0     |
| S8_extracted_k141_102166  | 1631  | No  | NA | 0    | 1 | Not-determined | Genome-fragment | NA    | 0     |
| S8_extracted_k141_24502   | 1166  | No  | NA | 0    | 0 | Not-determined | Genome-fragment | NA    | 0     |
| S8_extracted_k141_162713  | 4904  | No  | NA | 0    | 0 | Not-determined | Genome-fragment | NA    | 0     |
| S8_extracted_k141_49734   | 3316  | No  | NA | 0    | 0 | Not-determined | Genome-fragment | NA    | 0     |
| S8_extracted_k141_84863   | 1114  | No  | NA | 0    | 1 | Not-determined | Genome-fragment | NA    | 0     |
| S8_extracted_k141_6987    | 1044  | No  | NA | 0    | 1 | Not-determined | Genome-fragment | NA    | 0     |
| S8_extracted_k141_102173  | 3263  | No  | NA | 0    | 0 | Not-determined | Genome-fragment | NA    | 0     |
| S3_extracted_k141_95986   | 9657  | No  | NA | 3    | 0 | Low-quality    | Genome-fragment | 8.1   | 0     |
| S8_extracted_k141_93589   | 8697  | No  | NA | 0    | 0 | Not-determined | Genome-fragment | NA    | 0     |
| S8_extracted_k141_6989    | 2692  | No  | NA | 0    | 2 | Not-determined | Genome-fragment | NA    | 0     |
| S6_vs_k141_11740[full]    | 9657  | No  | NA | 12   | 0 | Low-quality    | Genome-fragment | 16.06 | 0     |
| S8_extracted_k141_136885  | 1030  | No  | NA | 0    | 1 | Not-determined | Genome-fragment | NA    | 0     |
| S16_vs_57587[full]        | 9663  | No  | NA | 1    | 0 | Low-quality    | Genome-fragment | 8.8   | 0     |
| S8_extracted_k141_172030  | 1079  | No  | NA | 0    | 2 | Not-determined | Genome-fragment | NA    | 0     |
| S8_extracted_k141_84906   | 2563  | No  | NA | 0    | 0 | Not-determined | Genome-fragment | NA    | 0     |
| S5_vs_k141_17006[full]    | 9672  | No  | NA | 1    | 0 | Low-quality    | Genome-fragment | 18.41 | 0     |
| S8_extracted_k141_145945  | 1745  | No  | NA | 0    | 0 | Not-determined | Genome-fragment | NA    | 0     |
| S8_extracted_k141_102202  | 1294  | No  | NA | 0    | 1 | Not-determined | Genome-fragment | NA    | 0     |
| S3_extracted_k141_125124  | 9673  | No  | NA | 6    | 1 | Low-quality    | Genome-fragment | 5.68  | 0     |
| S8_extracted_k141_93633   | 1313  | No  | NA | 0    | 0 | Not-determined | Genome-fragment | NA    | 0     |
| S8_extracted_k141_119697  | 3287  | No  | NA | 0    | 1 | Not-determined | Genome-fragment | NA    | 0     |
| S8_extracted_k141_7016    | 3066  | No  | NA | 0    | 0 | Not-determined | Genome-fragment | NA    | 0     |
| S8_extracted_k141_172034  | 1746  | No  | NA | 0    | 1 | Not-determined | Genome-fragment | NA    | 0     |
| S8_extracted_k141_10221   | 1050  | No  | NA | 0    | 1 | Not-determined | Genome-fragment | NA    | 0     |
| S8_extracted_k141_7017    | 2237  | No  | NA | 0    | 1 | Not-determined | Genome-fragment | NA    | 0     |
| S8_extracted_k141_49769   | 1878  | No  | NA | 0    | 1 | Not-determined | Genome-fragment | NA    | 0     |
| S8_extracted_k141_15156   | 1300  | No  | NA | 0    | 0 | Not-determined | Genome-fragment | NA    | 0     |
| S8_extracted_k141_15360   | 1582  | No  | NA | 0    | 0 | Not-determined | Genome-fragment | NA    | 0     |
| S8_extracted_k141_162780  | 1264  | No  | NA | 0    | 0 | Not-determined | Genome-fragment | NA    | 0     |
| S8_extracted_k141_93655   | 4416  | No  | NA | 0    | 0 | Not-determined | Genome-fragment | NA    | 0     |
| S8_extracted_k141_41561   | 5333  | No  | NA | 0    | 3 | Not-determined | Genome-fragment | NA    | 0     |
| S8_extracted_k141_172057  | 1071  | No  | NA | 0    | 3 | Not-determined | Genome-fragment | NA    | 0     |
| S8_extracted_k141_162799  | 3485  | No  | NA | 0    | 0 | Not-determined | Genome-fragment | NA    | 0     |
| S8_extracted_k141_162811  | 1178  | No  | NA | 0    | 0 | Not-determined | Genome-fragment | NA    | 0     |
| S8_extracted_k141_136917  | 1207  | No  | NA | 0    | 2 | Not-determined | Genome-fragment | NA    | 0     |
| S8_extracted_k141_162814  | 1118  | No  | NA | 0    | 1 | Not-determined | Genome-fragment | NA    | 0     |
| S8_extracted_k141_93676   | 1051  | No  | NA | 0    | 1 | Not-determined | Genome-fragment | NA    | 0     |
| S8_extracted_k141_41585   | 1146  | No  | NA | 0    | 0 | Not-determined | Genome-fragment | NA    | 0     |
| S8_extracted_k141_198110  | 1500  | No  | NA | 0    | 0 | Not-determined | Genome-fragment | NA    | 0     |
| S8_extracted_k141_111269  | 1252  | No  | NA | 0    | 0 | Not-determined | Genome-fragment | NA    | 0     |
| S8_extracted_k141_15394   | 1274  | No  | NA | 0    | 1 | Not-determined | Genome-fragment | NA    | 0     |
| S8_extracted_k141_24581   | 2150  | No  | NA | 0    | 0 | Not-determined | Genome-fragment | NA    | 0     |
| S8_extracted_k141_198122  | 1195  | No  | NA | 0    | 1 | Not-determined | Genome-fragment | NA    | 0     |
| S8_extracted_k141_31138   | 1503  | No  | NA | 0    | 0 | Not-determined | Genome-fragment | NA    | 0     |
| S8_extracted_k141_67424   | 1182  | No  | NA | 0    | 2 | Not-determined | Genome-fragment | NA    | 0     |
| S6_vs_k141_159076[full]   | 9683  | No  | NA | 0    | 2 | Low-quality    | Genome-fragment | 22.53 | 0     |
| S8_extracted_k141_7098    | 1512  | No  | NA | 0    | 0 | Not-determined | Genome-fragment | NA    | 0     |
| S8_extracted_k141_67439   | 1151  | No  | NA | 0    | 1 | Not-determined | Genome-fragment | NA    | 0     |
| S8_extracted_k141_188302  | 1349  | No  | NA | 0    | 2 | Not-determined | Genome-fragment | NA    | 0     |
| S8_extracted_k141_20149   | 5846  | No  | NA | 0    | 2 | Not-determined | Genome-fragment | NA    | 0     |
| S8_extracted_k141_198140  | 3757  | No  | NA | 0    | 3 | Not-determined | Genome-fragment | NA    | 0     |
| S8_extracted_k141_206114  | 1574  | No  | NA | 0    | 1 | Not-determined | Genome-fragment | NA    | 0     |
| S8_extracted_k141_30150   | 1121  | No  | NA | 0    | 0 | Not-determined | Genome-fragment | NA    | 0     |
| S8_extracted_k141_15145   | 1846  | No  | NA | 0    | 1 | Not-determined | Genome-fragment | NA    | 0     |
| S8_extracted_k141_172090  | 1056  | No  | NA | 0    | 1 | Not-determined | Genome-fragment | NA    | 0     |
| S8_extracted_k141_162865  | 2308  | No  | NA | 0    | 2 | Not-determined | Genome-fragment | NA    | 0     |
| S8_extracted_k141_146035  | 2065  | No  | NA | 0    | 2 | Not-determined | Genome-fragment | NA    | 0     |
| S8_extracted_k141_111330  | 1657  | No  | NA | 0    | 1 | Not-determined | Genome-fragment | NA    | 0     |
| S8_extracted_k141_172096  | 1410  | No  | NA | 0    | 0 | Not-determined | Genome-fragment | NA    | 0     |
| S4_extracted_23943        | 9684  | No  | NA | 0    | 0 | Low-quality    | Genome-fragment | 25.15 | 0     |
| S3_vs_k141_2492[full]     | 9694  | No  | NA | 4    | 0 | Low-quality    | Genome-fragment | 19.81 | 0     |
| S11_extracted_k141_72774  | 9701  | No  | NA | 5    | 0 | Low-quality    | Genome-fragment | 12.07 | 0     |
| S6_vs_k141_125372[full]   | 9702  | No  | NA | 0    | 5 | Low-quality    | Genome-fragment | 10.71 | 0     |
| S15_extracted_56371       | 9707  | No  | NA | 7    | 0 | Low-quality    | Genome-fragment | 21.6  | 0     |
| S8_extracted_k141_180766  | 1609  | No  | NA | 0    | 2 | Not-determined | Genome-fragment | NA    | 0     |
| S8_extracted_k141_49836   | 1092  | No  | NA | 0    | 1 | Not-determined | Genome-fragment | NA    | 0     |
| S8_extracted_k141_50971   | 1600  | No  | NA | 0    | 2 | Not-determined | Genome-fragment | NA    | 0     |
| S11_extracted_k141_17995  | 9716  | No  | NA | 2    | 0 | Low-quality    | Genome-fragment | 16.36 | 0     |
| S8_extracted_k141_49837   | 1590  | No  | NA | 0    | 1 | Not-determined | Genome-fragment | NA    | 0     |
| S11_vs_k141_168871[full]  | 9721  | No  | NA | 4    | 0 | Low-quality    | Genome-fragment | 24.37 | 0     |
| S5_vs_k141_135673[full]   | 9725  | No  | NA | 4    | 1 | Low-quality    | Genome-fragment | 17    | 0     |
| S8_extracted_k141_162886  | 1047  | No  | NA | 0    | 1 | Not-determined | Genome-fragment | NA    | 0     |
| S8_extracted_k141_111342  | 3816  | No  | NA | 0    | 2 | Not-determined | Genome-fragment | NA    | 0     |
| S8_extracted_k141_49844   | 1347  | No  | NA | 0    | 1 | Not-determined | Genome-fragment | NA    | 0     |
| S8_extracted_k141_128462  | 1276  | No  | NA | 0    | 1 | Not-determined | Genome-fragment | NA    | 0     |
| S8_extracted_k141_85021   | 1693  | No  | NA | 0    | 0 | Not-determined | Genome-fragment | NA    | 0     |
| S4_extracted_9103         | 9741  | Yes | NA | 1066 | 1 | Low-quality    | Genome-fragment | 1.05  | 89.06 |
| S8_extracted_k141_41650   | 4544  | No  | NA | 0    | 2 | Not-determined | Genome-fragment | NA    | 0     |
| S8_extracted_k141_128472  | 1116  | No  | NA | 0    | 1 | Not-determined | Genome-fragment | NA    | 0     |
| S8_extracted_k141_172129  | 1306  | No  | NA | 0    | 2 | Not-determined | Genome-fragment | NA    | 0     |
| S8_extracted_k141_2       |       |     |    |      |   |                |                 |       |       |



|                          |       |    |    |    |    |                |                 |                 |       |
|--------------------------|-------|----|----|----|----|----------------|-----------------|-----------------|-------|
| S8_extracted_k141_102384 | 1751  | No | NA | 0  | 2  | Not-determined | Genome-fragment | NA              | 0     |
| S8_extracted_k141_41727  | 3480  | No | NA | 0  | 0  | Not-determined | Genome-fragment | NA              | 0     |
| S8_extracted_k141_7165   | 1449  | No | NA | 0  | 0  | 1              | Not-determined  | Genome-fragment | NA    |
| S8_extracted_k141_93797  | 1311  | No | NA | 0  | 0  | 1              | Not-determined  | Genome-fragment | NA    |
| S8_extracted_k141_15514  | 3611  | No | NA | 0  | 2  | Not-determined | Genome-fragment | NA              | 0     |
| S8_extracted_k141_102395 | 1938  | No | NA | 0  | 0  | Not-determined | Genome-fragment | NA              | 0     |
| S8_extracted_k141_180870 | 1803  | No | NA | 0  | 1  | Not-determined | Genome-fragment | NA              | 0     |
| S8_extracted_k141_24733  | 1710  | No | NA | 0  | 0  | Not-determined | Genome-fragment | NA              | 0     |
| S8_extracted_k141_19827  | 1013  | No | NA | 0  | 1  | Not-determined | Genome-fragment | NA              | 0     |
| S8_extracted_k141_93814  | 1736  | No | NA | 0  | 0  | Not-determined | Genome-fragment | NA              | 0     |
| S9_extracted_k141_55700  | 9773  | No | NA | 1  | 0  | Low-quality    | Genome-fragment | NA              | 5.46  |
| S8_extracted_k141_198276 | 1939  | No | NA | 0  | 1  | Not-determined | Genome-fragment | NA              | 0     |
| S8_extracted_k141_41754  | 3254  | No | NA | 0  | 4  | Not-determined | Genome-fragment | NA              | 0     |
| S8_extracted_k141_119826 | 1048  | No | NA | 0  | 0  | Not-determined | Genome-fragment | NA              | 0     |
| S8_extracted_k141_24743  | 1953  | No | NA | 0  | 3  | Not-determined | Genome-fragment | NA              | 0     |
| S8_extracted_k141_115852 | 1155  | No | NA | 0  | 1  | Not-determined | Genome-fragment | NA              | 0     |
| S8_extracted_k141_119835 | 1405  | No | NA | 0  | 3  | Not-determined | Genome-fragment | NA              | 0     |
| S8_extracted_k141_162995 | 2040  | No | NA | 0  | 0  | Not-determined | Genome-fragment | NA              | 0     |
| S8_extracted_k141_15542  | 1152  | No | NA | 0  | 1  | Not-determined | Genome-fragment | NA              | 0     |
| S8_extracted_k141_172186 | 43104 | No | NA | 0  | 26 | Not-determined | Genome-fragment | NA              | 0     |
| S8_extracted_k141_33285  | 4468  | No | NA | 0  | 5  | Not-determined | Genome-fragment | NA              | 0     |
| S8_extracted_k141_172194 | 1578  | No | NA | 0  | 2  | Not-determined | Genome-fragment | NA              | 0     |
| S14_vs_k141_115241 full  | 9778  | No | NA | 1  | 0  | Low-quality    | Genome-fragment | NA              | 29.58 |
| S8_extracted_k141_24754  | 7430  | No | NA | 0  | 2  | Not-determined | Genome-fragment | NA              | 0     |
| S12_vs_k141_22377 full   | 9782  | No | NA | 1  | 0  | Low-quality    | Genome-fragment | NA              | 6.04  |
| S15_extracted_k4123      | 9787  | No | NA | 0  | 0  | Low-quality    | Genome-fragment | NA              | 9.87  |
| S8_extracted_k141_206231 | 4063  | No | NA | 0  | 0  | Not-determined | Genome-fragment | NA              | 0     |
| S8_extracted_k141_146168 | 1573  | No | NA | 0  | 2  | Not-determined | Genome-fragment | NA              | 0     |
| S12_vs_k141_127254 full  | 9789  | No | NA | 0  | 0  | Low-quality    | Genome-fragment | NA              | 16.13 |
| S8_extracted_k141_24774  | 6263  | No | NA | 0  | 3  | Not-determined | Genome-fragment | NA              | 0     |
| S8_extracted_k141_163039 | 7666  | No | NA | 0  | 5  | Not-determined | Genome-fragment | NA              | 0     |
| S8_extracted_k141_41807  | 1135  | No | NA | 0  | 0  | Not-determined | Genome-fragment | NA              | 0     |
| S14_vs_k141_56398 full   | 9792  | No | NA | 4  | 0  | Low-quality    | Genome-fragment | NA              | 22.81 |
| S8_extracted_k141_137089 | 3168  | No | NA | 0  | 3  | Not-determined | Genome-fragment | NA              | 0     |
| S13_extracted_k141_72562 | 9794  | No | NA | 2  | 0  | Low-quality    | Genome-fragment | NA              | 6.36  |
| S8_extracted_k141_24805  | 1257  | No | NA | 0  | 0  | Not-determined | Genome-fragment | NA              | 0     |
| S8_extracted_k141_188480 | 1480  | No | NA | 0  | 1  | Not-determined | Genome-fragment | NA              | 0     |
| S8_extracted_k141_163069 | 1098  | No | NA | 0  | 0  | Not-determined | Genome-fragment | NA              | 0     |
| S8_extracted_k141_16307  | 1254  | No | NA | 0  | 0  | Not-determined | Genome-fragment | NA              | 0     |
| S8_extracted_k141_15605  | 3163  | No | NA | 0  | 2  | Not-determined | Genome-fragment | NA              | 0     |
| S8_extracted_k141_115889 | 3862  | No | NA | 0  | 1  | Not-determined | Genome-fragment | NA              | 0     |
| S8_extracted_k141_118610 | 1321  | No | NA | 0  | 1  | Not-determined | Genome-fragment | NA              | 0     |
| S16_vs_k14173 full       | 9794  | No | NA | 0  | 0  | Low-quality    | Genome-fragment | NA              | 12.04 |
| S7_extracted_55205       | 9802  | No | NA | 3  | 0  | Low-quality    | Genome-fragment | NA              | 15.43 |
| S8_extracted_k141_172276 | 1597  | No | NA | 0  | 2  | Not-determined | Genome-fragment | NA              | 0     |
| S8_extracted_k141_180549 | 1092  | No | NA | 0  | 0  | Not-determined | Genome-fragment | NA              | 0     |
| S8_extracted_k141_198365 | 1842  | No | NA | 0  | 0  | Not-determined | Genome-fragment | NA              | 0     |
| S8_extracted_k141_7243   | 40403 | No | NA | 18 | 0  | Medium-quality | Genome-fragment | NA              | 81.63 |
| S8_extracted_k141_67567  | 1363  | No | NA | 0  | 0  | Not-determined | Genome-fragment | NA              | 0     |
| S5_extracted_k141_142033 | 9809  | No | NA | 5  | 0  | Low-quality    | Genome-fragment | NA              | 12.79 |
| S8_extracted_k141_102461 | 1198  | No | NA | 0  | 0  | Not-determined | Genome-fragment | NA              | 0     |
| S8_extracted_k141_163102 | 1262  | No | NA | 0  | 1  | Not-determined | Genome-fragment | NA              | 0     |
| S6_vs_k141_42271 full    | 9811  | No | NA | 3  | 0  | Low-quality    | Genome-fragment | NA              | 23.6  |
| S8_extracted_k141_180957 | 3791  | No | NA | 0  | 1  | Not-determined | Genome-fragment | NA              | 0     |
| S8_extracted_k141_76375  | 2543  | No | NA | 0  | 2  | Not-determined | Genome-fragment | NA              | 0     |
| S8_extracted_k141_7255   | 3119  | No | NA | 0  | 0  | Not-determined | Genome-fragment | NA              | 0     |
| S8_extracted_k141_50017  | 1480  | No | NA | 0  | 1  | Not-determined | Genome-fragment | NA              | 0     |
| S8_extracted_k141_15634  | 3053  | No | NA | 0  | 2  | Not-determined | Genome-fragment | NA              | 0     |
| S8_extracted_k141_119621 | 3102  | No | NA | 0  | 1  | Not-determined | Genome-fragment | NA              | 0     |
| S8_extracted_k141_198386 | 1554  | No | NA | 0  | 1  | Not-determined | Genome-fragment | NA              | 0     |
| S8_extracted_k141_146240 | 1767  | No | NA | 0  | 0  | Not-determined | Genome-fragment | NA              | 0     |
| S8_extracted_k141_59729  | 1404  | No | NA | 0  | 1  | Not-determined | Genome-fragment | NA              | 0     |
| S8_extracted_k141_198391 | 1077  | No | NA | 0  | 1  | Not-determined | Genome-fragment | NA              | 0     |
| S6_vs_k141_30079 full    | 9812  | No | NA | 3  | 1  | Low-quality    | Genome-fragment | NA              | 26.37 |
| S8_extracted_k141_72581  | 4001  | No | NA | 6  | 0  | Not-determined | Genome-fragment | NA              | 0     |
| S8_extracted_k141_33417  | 1848  | No | NA | 0  | 1  | Not-determined | Genome-fragment | NA              | 0     |
| S8_extracted_k141_93956  | 1952  | No | NA | 0  | 1  | Not-determined | Genome-fragment | NA              | 0     |
| S8_extracted_k141_154322 | 1096  | No | NA | 0  | 1  | Not-determined | Genome-fragment | NA              | 0     |
| S8_extracted_k141_102505 | 2114  | No | NA | 0  | 0  | Not-determined | Genome-fragment | NA              | 0     |
| S8_extracted_k141_172338 | 2920  | No | NA | 0  | 2  | Not-determined | Genome-fragment | NA              | 0     |
| S8_extracted_k141_180992 | 1042  | No | NA | 0  | 1  | Not-determined | Genome-fragment | NA              | 0     |
| S8_extracted_k141_7293   | 3207  | No | NA | 0  | 2  | Not-determined | Genome-fragment | NA              | 0     |
| S8_extracted_k141_67623  | 1224  | No | NA | 0  | 0  | Not-determined | Genome-fragment | NA              | 0     |
| S8_extracted_k141_206356 | 1393  | No | NA | 0  | 1  | Not-determined | Genome-fragment | NA              | 0     |
| S8_extracted_k141_119979 | 1402  | No | NA | 0  | 1  | Not-determined | Genome-fragment | NA              | 0     |
| S8_extracted_k141_7310   | 1441  | No | NA | 0  | 1  | Not-determined | Genome-fragment | NA              | 0     |
| S8_extracted_k141_7318   | 1784  | No | NA | 0  | 3  | Not-determined | Genome-fragment | NA              | 0     |
| S8_extracted_k141_119995 | 2238  | No | NA | 0  | 1  | Not-determined | Genome-fragment | NA              | 0     |
| S8_extracted_k141_155685 | 1436  | No | NA | 0  | 0  | Not-determined | Genome-fragment | NA              | 0     |
| S5_vs_k141_80389 full    | 9813  | No | NA | 8  | 0  | Low-quality    | Genome-fragment | NA              | 23.95 |
| S8_extracted_k141_76442  | 1431  | No | NA | 0  | 1  | Not-determined | Genome-fragment | NA              | 0     |
| S8_extracted_k141_120000 | 1311  | No | NA | 0  | 1  | Not-determined | Genome-fragment | NA              | 0     |
| S8_extracted_k141_102508 | 36360 | No | NA | 21 | 0  | High-quality   | High-quality    | NA              | 100   |
| S8_extracted_k141_188831 | 3651  | No | NA | 0  | 1  | Not-determined | Genome-fragment | NA              | 0     |
| S12_vs_k141_78262 full   | 9821  | No | NA | 0  | 1  | Low-quality    | Genome-fragment | NA              | 0.77  |
| S8_extracted_k141_198439 | 2159  | No | NA | 0  | 1  | Not-determined | Genome-fragment | NA              | 93.17 |
| S8_extracted_k141_128701 | 2658  | No | NA | 0  | 1  | Not-determined | Genome-fragment | NA              | 0     |
| S8_extracted_k141_34488  | 3066  | No | NA | 0  | 2  | Not-determined | Genome-fragment | NA              | 0     |
| S8_extracted_k141_154366 | 1450  | No | NA | 0  | 1  | Not-determined | Genome-fragment | NA              | 0     |
| S8_extracted_k141_102520 | 4409  | No | NA | 0  | 4  | Not-determined | Genome-fragment | NA              | 0     |
| S8_extracted_k141_50105  | 1131  | No | NA | 0  | 1  | Not-determined | Genome-fragment | NA              | 0     |
| S8_extracted_k141_120021 | 4156  | No | NA | 0  | 1  | Not-determined | Genome-fragment | NA              | 0     |
| S8_extracted_k141_154380 | 2298  | No | NA | 0  | 1  | Not-determined | Genome-fragment | NA              | 0     |
| S8_extracted_k141_128733 | 1055  | No | NA | 0  | 1  | Not-determined | Genome-fragment | NA              | 0     |
| S8_extracted_k141_206403 | 3535  | No | NA | 0  | 1  | Not-determined | Genome-fragment | NA              | 0     |
| S8_extracted_k141_93976  | 26682 | No | NA | 5  | 0  | Medium-quality | Genome-fragment | NA              | 72.63 |
| S8_extracted_k141_37518  | 9822  | No | NA | 0  | 2  | Low-quality    | Genome-fragment | NA              | 10.85 |
| S8_extracted_k141_206418 | 1186  | No | NA | 0  | 0  | Not-determined | Genome-fragment | NA              | 0     |
| S8_extracted_k141_172428 | 1136  | No | NA | 0  | 0  | Not-determined | Genome-fragment | NA              | 0     |
| S8_extracted_k141_24837  | 3176  | No | NA | 0  | 1  | Not-determined | Genome-fragment | NA              | 0     |
| S8_extracted_k141_102554 | 1823  | No | NA | 0  | 0  | Not-determined | Genome-fragment | NA              | 0     |
| S8_extracted_k141_33513  | 1136  | No | NA | 0  | 0  | Not-determined | Genome-fragment | NA              | 0     |
| S8_extracted_k141_111657 | 1404  | No | NA | 0  | 0  | Not-determined | Genome-fragment | NA              | 0     |
| S8_extracted_k141_181079 | 1029  | No | NA | 0  | 1  | Not-determined | Genome-fragment | NA              | 0     |
| S8_extracted_k141_137274 | 1215  | No | NA | 0  | 1  | Not-determined | Genome-fragment | NA              | 0     |
| S8_extracted_k141_198506 | 3236  | No | NA | 0  | 1  | Not-determined | Genome-fragment | NA              | 0     |
| S5_extracted_k141_20344  | 9831  | No | NA | 3  | 0  | Low-quality    | Genome-fragment | NA              | 6.32  |
| S8_extracted_k141_128782 | 1336  | No | NA | 0  | 0  | Not-determined | Genome-fragment | NA              | 0     |
| S8_extracted_k141_172457 | 2640  | No | NA | 0  | 0  | Not-determined | Genome-fragment | NA              | 0     |
| S8_extracted_k141_102600 | 1128  | No | NA | 0  | 0  | Not-determined | Genome-fragment | NA              | 0     |
| S8_extracted_k141_198516 | 1198  | No | NA | 0  | 1  | Not-determined | Genome-fragment | NA              | 0     |
| S8_extracted_k141_154451 | 1268  | No | NA | 0  | 0  | Not-determined | Genome-fragment | NA              | 0     |
| S8_extracted_k141_120068 | 22254 | No | NA | 0  | 18 | Not-determined | Genome-fragment | NA              | 0     |
| S8_extracted_k141_198550 | 1083  | No | NA | 0  | 0  | Not-determined | Genome-fragment | NA              | 0     |
| S8_extracted_k141_206496 | 7874  | No | NA | 0  | 1  | Not-determined | Genome-fragment | NA              | 0     |
| S8_extracted_k141_188604 | 1349  | No | NA | 0  | 2  | Not-determined | Genome-fragment | NA              | 0     |
| S8_extracted_k141_67763  | 8587  | No | NA | 0  | 0  | Not-determined | Genome-fragment | NA              | 0     |
| S8_extracted_k141_76569  | 2273  | No | NA | 0  | 2  | Not-determined | Genome-fragment | NA              | 0     |
| S8_extracted_k141_137312 | 2277  | No | NA | 0  | 0  | Not-determined | Genome-fragment | NA              | 0     |
| S8_extracted_k141_33564  | 3215  | No | NA | 0  | 1  | Not-determined | Genome-fragment | NA              | 0     |
| S8_extracted_k141_50219  | 1373  | No | NA | 0  | 0  | Not-determined | Genome-fragment | NA              | 0     |
| S8_extracted_k141_24842  | 6642  | No | NA | 0  | 0  | Not-determined | Genome-fragment | NA              | 0     |
| S8_extracted_k141_154503 | 1730  | No | NA | 0  | 1  | Not-determined | Genome-fragment | NA              | 0     |
| S8_extracted_k141_113739 | 1417  | No | NA | 0  | 1  | Not-determined | Genome-fragment | NA              | 0     |
| S8_extracted_k141_120114 | 1212  | No | NA | 0  | 1  | Not-determined | Genome-fragment | NA              | 0     |
| S8_extracted_k141_206513 | 1213  | No | NA | 0  | 1  | Not-determined | Genome-fragment | NA              | 0     |
| S8_extracted_k141_128846 | 2500  | No | NA | 0  | 1  | Not-determined | Genome-fragment | NA              | 0     |
| S8_extracted_k141_137350 | 4164  | No | NA | 0  | 3  | Not-determined | Genome-fragment | NA              | 0     |
| S8_extracted_k141_172509 | 1123  | No | NA | 0  | 1  | Not-determined | Genome-fragment | NA              | 0     |
| S8_extracted_k141_154543 | 1898  | No | NA | 0  | 3  | Not-determined | Genome-fragment | NA              | 0     |
| S8_extracted_k141_188665 | 5716  | No | NA | 0  | 2  | Not-determined | Genome-fragment | NA              | 0     |
| S8_extracted_k141_76621  | 1048  | No | NA | 0  | 0  | Not-determined | Genome-fragment | NA              | 0     |
| S8_extracted_k141_111765 | 1030  | No | NA | 0  | 0  | Not-determined | Genome-fragment | NA              | 0     |
| S8_extracted_k141_188666 | 1908  | No | NA | 0  | 1  | Not-determined | Genome-fragment | NA              | 0     |
| S8_extracted_k141_183246 | 3406  | No | NA | 0  | 1  | Not-determined | Genome-fragment | NA              | 0     |
| S8_extracted_k141_76632  | 1096  | No | NA | 0  | 0  | Not-determined | Genome-fragment | NA              | 0     |
| S8_extracted_k141_128860 | 1534  | No | NA | 0  | 0  | Not-determined | Genome-fragment | NA              | 0     |
| S8_extracted_k141_198599 | 1084  | No | NA | 0  | 1  | Not-determined | Genome-fragment | NA              | 0     |
| S8_extracted_k141_24884  | 1293  | No | NA | 0  | 2  | Not-determined | Genome-fragment | NA              | 0     |
| S8_extracted_k141_146302 | 1260  | No | NA | 0  | 1  | Not-determined | Genome-fragment | NA              | 0     |
| S8_extracted_k141_76653  | 1375  | No | NA | 0  | 0  | Not-determined | Genome-fragment | NA              | 0     |
| S8_extracted_k141_154558 | 3222  | No | NA | 0  | 8  | Not-determined | Genome-fragment | NA              | 0     |
| S15_vs_28129 full        | 9831  | No | NA | 1  | 2  | Low-quality    | Genome-fragment | NA              | 2.54  |
| S8_extracted_k141_76661  | 1919  | No | NA | 0  | 1  | Not-determined | Genome-fragment | NA              | 0     |
| S8_extracted_k141_54125  | 3003  | No | NA | 0  | 2  | Not-determined | Genome-fragment | NA              | 0     |
| S16_vs_30441 full        | 9833  | No | NA |    |    |                |                 |                 |       |



|                           |       |     |      |    |   |                |                 |    |       |       |
|---------------------------|-------|-----|------|----|---|----------------|-----------------|----|-------|-------|
| S8_extracted_k141_42136   | 1041  | No  | NA   | 0  | 0 | Not-determined | Genome-fragment | NA | 0     | 0     |
| S8_extracted_k141_50341   | 4513  | No  | NA   | 0  | 0 | Not-determined | Genome-fragment | NA | 0     | 0     |
| S8_extracted_k141_120210  | 6816  | No  | NA   | 0  | 4 | Not-determined | Genome-fragment | NA | 0     | 0     |
| S8_extracted_k141_42139   | 1548  | No  | NA   | 0  | 0 | Not-determined | Genome-fragment | NA | 0     | 0     |
| S8_extracted_k141_89901   | 9876  | No  | NA   | 10 | 0 | Low-quality    | Genome-fragment | NA | 26.88 | 0     |
| S8_extracted_k141_50806   | 1884  | No  | NA   | 0  | 0 | Not-determined | Genome-fragment | NA | 0     | 0     |
| S8_extracted_k141_128990  | 1117  | No  | NA   | 0  | 1 | Not-determined | Genome-fragment | NA | 0     | 0     |
| S8_extracted_k141_128999  | 1323  | No  | NA   | 0  | 1 | Not-determined | Genome-fragment | NA | 0     | 0     |
| S8_extracted_k141_50365   | 1117  | No  | NA   | 0  | 0 | Not-determined | Genome-fragment | NA | 0     | 0     |
| S8_extracted_k141_146432  | 1479  | No  | NA   | 0  | 0 | Not-determined | Genome-fragment | NA | 0     | 0     |
| S8_extracted_k141_154660  | 1932  | No  | NA   | 0  | 1 | Not-determined | Genome-fragment | NA | 0     | 0     |
| S8_extracted_k141_50371   | 1752  | No  | NA   | 0  | 0 | Not-determined | Genome-fragment | NA | 0     | 0     |
| S10_vs_15568[full]        | 9878  | No  | NA   | 4  | 0 | Low-quality    | Genome-fragment | NA | 25.91 | 0     |
| S8_extracted_k141_85475   | 1699  | No  | NA   | 0  | 2 | Not-determined | Genome-fragment | NA | 0     | 0     |
| S8_extracted_k141_50381   | 5636  | No  | NA   | 0  | 1 | Not-determined | Genome-fragment | NA | 0     | 0     |
| S8_extracted_k141_85477   | 5647  | No  | NA   | 0  | 5 | Not-determined | Genome-fragment | NA | 0     | 0     |
| S1_extracted_k141_89949   | 9882  | No  | NA   | 6  | 0 | Low-quality    | Genome-fragment | NA | 24.64 | 0     |
| S11_extracted_k141_4698   | 9898  | No  | NA   | 6  | 0 | Low-quality    | Genome-fragment | NA | 24.34 | 0     |
| S8_extracted_k141_15818   | 5203  | No  | NA   | 0  | 0 | Not-determined | Genome-fragment | NA | 0     | 0     |
| S11_extracted_k141_80701  | 9904  | No  | NA   | 1  | 0 | Low-quality    | Genome-fragment | NA | 6.07  | 0     |
| S8_extracted_k141_85487   | 1145  | No  | NA   | 0  | 1 | Not-determined | Genome-fragment | NA | 0     | 0     |
| S8_extracted_k141_198771  | 5553  | No  | NA   | 0  | 3 | Not-determined | Genome-fragment | NA | 0     | 0     |
| S8_extracted_k141_198780  | 2125  | No  | NA   | 0  | 1 | Not-determined | Genome-fragment | NA | 0     | 0     |
| S8_extracted_k141_154686  | 1085  | No  | NA   | 0  | 1 | Not-determined | Genome-fragment | NA | 0     | 0     |
| S8_extracted_k141_42193   | 3245  | No  | NA   | 0  | 2 | Not-determined | Genome-fragment | NA | 0     | 0     |
| S8_extracted_k141_146462  | 1884  | No  | NA   | 0  | 1 | Not-determined | Genome-fragment | NA | 0     | 0     |
| S8_extracted_k141_206618  | 1237  | No  | NA   | 0  | 1 | Not-determined | Genome-fragment | NA | 0     | 0     |
| S8_extracted_k141_172677  | 2433  | No  | NA   | 0  | 2 | Not-determined | Genome-fragment | NA | 0     | 0     |
| S8_extracted_k141_67958   | 2485  | No  | NA   | 0  | 2 | Not-determined | Genome-fragment | NA | 0     | 0     |
| S14_extracted_k141_13793  | 9910  | No  | NA   | 5  | 0 | Low-quality    | Genome-fragment | NA | 17.02 | 0     |
| S8_extracted_k141_7627    | 1127  | No  | NA   | 0  | 1 | Not-determined | Genome-fragment | NA | 0     | 0     |
| S12_extracted_k141_126091 | 9914  | No  | NA   | 7  | 0 | Low-quality    | Genome-fragment | NA | 25.38 | 0     |
| S8_extracted_k141_59884   | 1331  | No  | NA   | 0  | 1 | Not-determined | Genome-fragment | NA | 0     | 0     |
| S8_extracted_k141_33834   | 1736  | No  | NA   | 0  | 1 | Not-determined | Genome-fragment | NA | 0     | 0     |
| S8_extracted_k141_94249   | 8460  | No  | NA   | 0  | 5 | Not-determined | Genome-fragment | NA | 0     | 0     |
| S8_extracted_k141_33841   | 1798  | No  | NA   | 0  | 1 | Not-determined | Genome-fragment | NA | 0     | 0     |
| S8_extracted_k141_67975   | 1073  | No  | NA   | 0  | 1 | Not-determined | Genome-fragment | NA | 0     | 0     |
| S8_extracted_k141_181318  | 2108  | No  | NA   | 0  | 2 | Not-determined | Genome-fragment | NA | 0     | 0     |
| S8_extracted_k141_146479  | 1917  | No  | NA   | 0  | 2 | Not-determined | Genome-fragment | NA | 0     | 0     |
| S8_extracted_k141_67978   | 4557  | No  | NA   | 0  | 2 | Not-determined | Genome-fragment | NA | 0     | 0     |
| S3_vs_k141_20769[full]    | 9924  | No  | NA   | 2  | 0 | Low-quality    | Genome-fragment | NA | 20.7  | 0     |
| S8_extracted_k141_198835  | 1127  | No  | NA   | 0  | 1 | Not-determined | Genome-fragment | NA | 0     | 0     |
| S8_extracted_k141_137512  | 1184  | No  | NA   | 0  | 0 | Not-determined | Genome-fragment | NA | 0     | 0     |
| S8_extracted_k141_102730  | 1886  | No  | NA   | 0  | 1 | Not-determined | Genome-fragment | NA | 0     | 0     |
| S4_vs_VHSorice_2932-cat_1 | 9924  | No  | NA   | 8  | 0 | Low-quality    | Genome-fragment | NA | 24.04 | 0     |
| S3_vs_k141_18328[full]    | 9925  | Yes | 7893 | 2  | 1 | Low-quality    | Genome-fragment | NA | 17.25 | 20.47 |
| S8_extracted_k141_33863   | 1164  | No  | NA   | 0  | 1 | Not-determined | Genome-fragment | NA | 0     | 0     |
| S8_extracted_k141_76858   | 1425  | No  | NA   | 0  | 0 | Not-determined | Genome-fragment | NA | 0     | 0     |
| S8_extracted_k141_102791  | 1303  | No  | NA   | 0  | 1 | Not-determined | Genome-fragment | NA | 0     | 0     |
| S8_extracted_k141_172748  | 1137  | No  | NA   | 0  | 0 | Not-determined | Genome-fragment | NA | 0     | 0     |
| S8_extracted_k141_85562   | 2580  | No  | NA   | 0  | 1 | Not-determined | Genome-fragment | NA | 0     | 0     |
| S8_extracted_k141_76872   | 2240  | No  | NA   | 0  | 0 | Not-determined | Genome-fragment | NA | 0     | 0     |
| S8_extracted_k141_94292   | 4638  | No  | NA   | 0  | 4 | Not-determined | Genome-fragment | NA | 0     | 0     |
| S8_extracted_k141_146522  | 1133  | No  | NA   | 0  | 0 | Not-determined | Genome-fragment | NA | 0     | 0     |
| S8_extracted_k141_102764  | 1006  | No  | NA   | 0  | 2 | Not-determined | Genome-fragment | NA | 0     | 0     |
| S8_extracted_k141_94299   | 1174  | No  | NA   | 0  | 0 | Not-determined | Genome-fragment | NA | 0     | 0     |
| S8_extracted_k141_120403  | 1143  | No  | NA   | 0  | 2 | Not-determined | Genome-fragment | NA | 0     | 0     |
| S8_extracted_k141_85568   | 2930  | No  | NA   | 0  | 2 | Not-determined | Genome-fragment | NA | 0     | 0     |
| S8_extracted_k141_120401  | 1049  | No  | NA   | 0  | 0 | Not-determined | Genome-fragment | NA | 0     | 0     |
| S12_vs_k141_116337[full]  | 9927  | No  | NA   | 1  | 0 | Low-quality    | Genome-fragment | NA | 14.42 | 0     |
| S8_extracted_k141_68027   | 1117  | No  | NA   | 0  | 1 | Not-determined | Genome-fragment | NA | 0     | 0     |
| S8_extracted_k141_188806  | 1577  | No  | NA   | 0  | 1 | Not-determined | Genome-fragment | NA | 0     | 0     |
| S8_extracted_k141_7669    | 1073  | No  | NA   | 0  | 0 | Not-determined | Genome-fragment | NA | 0     | 0     |
| S8_extracted_k141_85576   | 1692  | No  | NA   | 0  | 2 | Not-determined | Genome-fragment | NA | 0     | 0     |
| S8_extracted_k141_59951   | 1246  | No  | NA   | 0  | 0 | Not-determined | Genome-fragment | NA | 0     | 0     |
| S8_extracted_k141_68035   | 4149  | No  | NA   | 0  | 2 | Not-determined | Genome-fragment | NA | 0     | 0     |
| S8_extracted_k141_59954   | 1836  | No  | NA   | 0  | 2 | Not-determined | Genome-fragment | NA | 0     | 0     |
| S8_extracted_k141_111872  | 2243  | No  | NA   | 0  | 2 | Not-determined | Genome-fragment | NA | 0     | 0     |
| S8_extracted_k141_59966   | 1528  | No  | NA   | 0  | 0 | Not-determined | Genome-fragment | NA | 0     | 0     |
| S7_extracted_95873        | 9929  | No  | NA   | 10 | 0 | Low-quality    | Genome-fragment | NA | 16.09 | 0     |
| S12_vs_k141_64139[full]   | 9930  | No  | NA   | 1  | 1 | Low-quality    | Genome-fragment | NA | 29.09 | 0     |
| S8_extracted_k141_33918   | 1151  | No  | NA   | 0  | 1 | Not-determined | Genome-fragment | NA | 0     | 0     |
| S8_extracted_k141_94332   | 2182  | No  | NA   | 0  | 1 | Not-determined | Genome-fragment | NA | 0     | 0     |
| S8_extracted_k141_94339   | 3416  | No  | NA   | 0  | 0 | Not-determined | Genome-fragment | NA | 0     | 0     |
| S8_extracted_k141_42278   | 2019  | No  | NA   | 0  | 2 | Not-determined | Genome-fragment | NA | 0     | 0     |
| S3_extracted_k141_104768  | 9933  | No  | NA   | 3  | 0 | Low-quality    | Genome-fragment | NA | 5.56  | 0     |
| S8_extracted_k141_137605  | 1327  | No  | NA   | 0  | 1 | Not-determined | Genome-fragment | NA | 0     | 0     |
| S8_extracted_k141_188843  | 1110  | No  | NA   | 0  | 0 | Not-determined | Genome-fragment | NA | 0     | 0     |
| S8_extracted_k141_42298   | 1178  | No  | NA   | 0  | 1 | Not-determined | Genome-fragment | NA | 0     | 0     |
| S8_extracted_k141_76966   | 1059  | No  | NA   | 0  | 2 | Not-determined | Genome-fragment | NA | 0     | 0     |
| S8_extracted_k141_146605  | 2891  | No  | NA   | 0  | 0 | Not-determined | Genome-fragment | NA | 0     | 0     |
| S8_extracted_k141_201155  | 1120  | No  | NA   | 0  | 1 | Not-determined | Genome-fragment | NA | 0     | 0     |
| S8_extracted_k141_146608  | 1117  | No  | NA   | 0  | 0 | Not-determined | Genome-fragment | NA | 0     | 0     |
| S8_extracted_k141_76974   | 1185  | No  | NA   | 0  | 2 | Not-determined | Genome-fragment | NA | 0     | 0     |
| S8_extracted_k141_146616  | 1151  | No  | NA   | 0  | 1 | Not-determined | Genome-fragment | NA | 0     | 0     |
| S8_extracted_k141_94361   | 3494  | No  | NA   | 5  | 0 | Medium-quality | Genome-fragment | NA | 69.02 | 0     |
| S8_extracted_k141_60028   | 4063  | No  | NA   | 0  | 3 | Not-determined | Genome-fragment | NA | 0     | 0     |
| S8_extracted_k141_76977   | 5855  | No  | NA   | 0  | 1 | Not-determined | Genome-fragment | NA | 0     | 0     |
| S8_extracted_k141_94364   | 1361  | No  | NA   | 0  | 1 | Not-determined | Genome-fragment | NA | 0     | 0     |
| S8_extracted_k141_68096   | 1376  | No  | NA   | 0  | 1 | Not-determined | Genome-fragment | NA | 0     | 0     |
| S8_extracted_k141_94372   | 1173  | No  | NA   | 0  | 1 | Not-determined | Genome-fragment | NA | 0     | 0     |
| S8_extracted_k141_85673   | 2586  | No  | NA   | 0  | 0 | Not-determined | Genome-fragment | NA | 0     | 0     |
| S8_extracted_k141_129226  | 1708  | No  | NA   | 0  | 1 | Not-determined | Genome-fragment | NA | 0     | 0     |
| S8_extracted_k141_34002   | 1838  | No  | NA   | 0  | 1 | Not-determined | Genome-fragment | NA | 0     | 0     |
| S8_extracted_k141_181471  | 3165  | No  | NA   | 0  | 0 | Not-determined | Genome-fragment | NA | 0     | 0     |
| S8_extracted_k141_154830  | 1492  | No  | NA   | 0  | 0 | Not-determined | Genome-fragment | NA | 0     | 0     |
| S8_extracted_k141_15958   | 1391  | No  | NA   | 0  | 2 | Not-determined | Genome-fragment | NA | 0     | 0     |
| S16_vs_140379[full]       | 9934  | No  | NA   | 1  | 1 | Low-quality    | Genome-fragment | NA | 15.33 | 0     |
| S8_extracted_k141_146640  | 1122  | No  | NA   | 2  | 0 | Not-determined | Genome-fragment | NA | 0     | 0     |
| S13_extracted_14131       | 9936  | No  | NA   | 2  | 1 | Low-quality    | Genome-fragment | NA | 13.43 | 0     |
| S3_vs_k141_104360[full]   | 9936  | No  | NA   | 1  | 0 | Low-quality    | Genome-fragment | NA | 22.85 | 0     |
| S8_extracted_k141_85701   | 1278  | No  | NA   | 0  | 1 | Not-determined | Genome-fragment | NA | 0     | 0     |
| S16_extracted_110287      | 9938  | No  | NA   | 14 | 0 | Low-quality    | Genome-fragment | NA | 26.68 | 0     |
| S8_extracted_k141_102920  | 4095  | No  | NA   | 0  | 1 | Not-determined | Genome-fragment | NA | 0     | 0     |
| S8_extracted_k141_129244  | 2474  | No  | NA   | 0  | 0 | Not-determined | Genome-fragment | NA | 0     | 0     |
| S8_extracted_k141_42350   | 2451  | No  | NA   | 0  | 2 | Not-determined | Genome-fragment | NA | 0     | 0     |
| S8_extracted_k141_25190   | 3075  | No  | NA   | 0  | 2 | Not-determined | Genome-fragment | NA | 0     | 0     |
| S8_extracted_k141_42359   | 1252  | No  | NA   | 0  | 1 | Not-determined | Genome-fragment | NA | 0     | 0     |
| S8_extracted_k141_102937  | 1719  | No  | NA   | 0  | 1 | Not-determined | Genome-fragment | NA | 0     | 0     |
| S8_extracted_k141_34056   | 2999  | No  | NA   | 0  | 1 | Not-determined | Genome-fragment | NA | 0     | 0     |
| S3_vs_k141_112519[full]   | 9946  | No  | NA   | 0  | 7 | Low-quality    | Genome-fragment | NA | 4.95  | 0     |
| S8_extracted_k141_112017  | 2919  | No  | NA   | 0  | 1 | Not-determined | Genome-fragment | NA | 0     | 0     |
| S8_extracted_k141_206853  | 1003  | No  | NA   | 0  | 0 | Not-determined | Genome-fragment | NA | 0     | 0     |
| S8_extracted_k141_7839    | 4057  | No  | NA   | 0  | 2 | Not-determined | Genome-fragment | NA | 0     | 0     |
| S8_extracted_k141_50131   | 1309  | No  | NA   | 0  | 1 | Not-determined | Genome-fragment | NA | 0     | 0     |
| S8_extracted_k141_206863  | 1011  | No  | NA   | 0  | 1 | Not-determined | Genome-fragment | NA | 0     | 0     |
| S8_extracted_k141_94472   | 1082  | No  | NA   | 0  | 0 | Not-determined | Genome-fragment | NA | 0     | 0     |
| S8_extracted_k141_188847  | 1255  | No  | NA   | 0  | 1 | Not-determined | Genome-fragment | NA | 0     | 0     |
| S8_extracted_k141_199047  | 2442  | No  | NA   | 0  | 0 | Not-determined | Genome-fragment | NA | 0     | 0     |
| S8_extracted_k141_163553  | 1419  | No  | NA   | 0  | 0 | Not-determined | Genome-fragment | NA | 0     | 0     |
| S8_extracted_k141_181542  | 1440  | No  | NA   | 0  | 0 | Not-determined | Genome-fragment | NA | 0     | 0     |
| S8_extracted_k141_199050  | 1609  | No  | NA   | 0  | 1 | Not-determined | Genome-fragment | NA | 0     | 0     |
| S8_extracted_k141_7880    | 2041  | No  | NA   | 0  | 2 | Not-determined | Genome-fragment | NA | 0     | 0     |
| S8_extracted_k141_34097   | 1238  | No  | NA   | 0  | 1 | Not-determined | Genome-fragment | NA | 0     | 0     |
| S8_extracted_k141_137776  | 2152  | No  | NA   | 0  | 1 | Not-determined | Genome-fragment | NA | 0     | 0     |
| S8_extracted_k141_85767   | 2329  | No  | NA   | 0  | 2 | Not-determined | Genome-fragment | NA | 0     | 0     |
| S12_vs_k141_149430[full]  | 9949  | No  | NA   | 2  | 1 | Low-quality    | Genome-fragment | NA | 20.2  | 0     |
| S8_extracted_k141_199052  | 6867  | No  | NA   | 3  | 1 | Not-determined | Genome-fragment | NA | 0     | 0     |
| S8_extracted_k141_154920  | 1174  | No  | NA   | 0  | 1 | Not-determined | Genome-fragment | NA | 0     | 0     |
| S8_extracted_k141_60177   | 4389  | No  | NA   | 0  | 2 | Not-determined | Genome-fragment | NA | 0     | 0     |
| S8_extracted_k141_85773   | 1139  | No  | NA   | 0  | 0 | Not-determined | Genome-fragment | NA | 0     | 0     |
| S16_vs_18824[full]        | 1733  | No  | NA   | 0  | 1 | Not-determined | Genome-fragment | NA | 0     | 0     |
| S8_extracted_k141_42401   | 9950  | No  | NA   | 5  | 0 | Low-quality    | Genome-fragment | NA | 20.95 | 0     |
| S8_extracted_k141_112084  | 20059 | No  | NA   | 0  | 6 | Not-determined | Genome-fragment | NA | 0     | 0     |
| S8_extracted_k141_77103   | 1886  | No  | NA   | 0  | 2 | Not-determined | Genome-fragment | NA | 0     | 0     |
| S8_extracted_k141_199079  | 1414  | No  | NA   | 0  | 0 | Not-determined | Genome-fragment | NA | 0     |       |



|                             |       |     |      |    |   |                |                 |    |       |
|-----------------------------|-------|-----|------|----|---|----------------|-----------------|----|-------|
| 58_extracted_k141_189091    | 3864  | No  | NA   | 0  | 0 | Not-determined | Genome-fragment | NA | 0     |
| 58_extracted_k141_146801    | 1012  | No  | NA   | 0  | 0 | Not-determined | Genome-fragment | NA | 0     |
| 58_extracted_k141_77726     | 1409  | No  | NA   | 0  | 0 | Not-determined | Genome-fragment | NA | 0     |
| 58_extracted_k141_25416     | 1855  | No  | NA   | 0  | 1 | Not-determined | Genome-fragment | NA | 0     |
| 58_extracted_k141_89598     | 1255  | No  | NA   | 0  | 0 | Not-determined | Genome-fragment | NA | 0     |
| 58_extracted_k141_16172     | 3746  | No  | NA   | 2  | 0 | Medium-quality | Genome-fragment | NA | 58.96 |
| 51_extracted_k141_101189    | 9982  | No  | NA   | 5  | 0 | Low-quality    | Genome-fragment | NA | 17.07 |
| 58_extracted_k141_189106    | 8235  | No  | NA   | 0  | 2 | Not-determined | Genome-fragment | NA | 0     |
| 58_extracted_k141_47223     | 9982  | No  | NA   | 0  | 0 | Low-quality    | Genome-fragment | NA | 13.09 |
| 58_extracted_k141_181716    | 3166  | No  | NA   | 0  | 1 | Not-determined | Genome-fragment | NA | 0     |
| 58_extracted_k141_206996    | 1020  | No  | NA   | 0  | 1 | Not-determined | Genome-fragment | NA | 0     |
| 57_vs_832891[full]          | 9984  | No  | NA   | 0  | 7 | Low-quality    | Genome-fragment | NA | 4.98  |
| 58_extracted_k141_78168     | 9989  | No  | NA   | 1  | 0 | Low-quality    | Genome-fragment | NA | 6.71  |
| 58_extracted_k141_1112208   | 2631  | No  | NA   | 0  | 4 | Not-determined | Genome-fragment | NA | 0     |
| 57_vs_126141[full]          | 9996  | No  | NA   | 2  | 0 | Low-quality    | Genome-fragment | NA | 23.54 |
| 58_extracted_k141_159232    | 1155  | No  | NA   | 0  | 0 | Not-determined | Genome-fragment | NA | 0     |
| 56_extracted_k141_35457     | 9997  | No  | NA   | 2  | 0 | Low-quality    | Genome-fragment | NA | 3.06  |
| 55_vs_k141_68958[full]      | 10005 | No  | NA   | 0  | 2 | Low-quality    | Genome-fragment | NA | 24.14 |
| 58_extracted_k141_181762    | 1027  | No  | NA   | 0  | 0 | Not-determined | Genome-fragment | NA | 0     |
| 58_extracted_k141_189156    | 1252  | No  | NA   | 0  | 0 | Not-determined | Genome-fragment | NA | 0     |
| 58_extracted_k141_25481     | 1084  | No  | NA   | 0  | 0 | Not-determined | Genome-fragment | NA | 0     |
| 58_extracted_k141_189151    | 1230  | No  | NA   | 0  | 0 | Not-determined | Genome-fragment | NA | 0     |
| 58_extracted_k141_163721    | 1236  | No  | NA   | 0  | 0 | Not-determined | Genome-fragment | NA | 0     |
| 516_extracted_134775        | 10005 | No  | NA   | 3  | 0 | Low-quality    | Genome-fragment | NA | 18.45 |
| 516_vs_66234[full]          | 10005 | No  | NA   | 1  | 1 | Low-quality    | Genome-fragment | NA | 7.34  |
| 58_extracted_k141_16227     | 1753  | No  | NA   | 0  | 0 | Not-determined | Genome-fragment | NA | 0     |
| 58_extracted_k141_146931    | 2092  | No  | NA   | 0  | 1 | Not-determined | Genome-fragment | NA | 0     |
| 58_extracted_k141_120683    | 1872  | No  | NA   | 0  | 1 | Not-determined | Genome-fragment | NA | 0     |
| 58_extracted_k141_60393     | 2379  | No  | NA   | 0  | 0 | Not-determined | Genome-fragment | NA | 0     |
| 58_extracted_k141_189162    | 3599  | No  | NA   | 0  | 2 | Not-determined | Genome-fragment | NA | 0     |
| 58_extracted_k141_137956    | 1028  | No  | NA   | 0  | 0 | Not-determined | Genome-fragment | NA | 0     |
| 59_vs_k141_3951[full]       | 20007 | No  | NA   | 0  | 1 | Low-quality    | Genome-fragment | NA | 24.11 |
| 58_extracted_k141_146950    | 1920  | No  | NA   | 2  | 2 | Not-determined | Genome-fragment | NA | 0     |
| 58_extracted_k141_129423    | 27408 | No  | NA   | 18 | 0 | High-quality   | High-quality    | NA | 95.08 |
| 58_extracted_k141_120707    | 1634  | No  | NA   | 0  | 1 | Not-determined | Genome-fragment | NA | 0     |
| 511_extracted_k141_47288    | 10014 | No  | NA   | 0  | 0 | Low-quality    | Genome-fragment | NA | 22.05 |
| 512_extracted_k141_185588   | 10014 | No  | NA   | 5  | 1 | Low-quality    | Genome-fragment | NA | 23.25 |
| 55_vs_k141_43074[full]      | 10028 | Yes | 4377 | 1  | 5 | Low-quality    | Genome-fragment | NA | 0.2   |
| 58_extracted_k141_42565     | 1943  | No  | NA   | 2  | 0 | Not-determined | Genome-fragment | NA | 56.35 |
| 58_extracted_k141_68395     | 6135  | No  | NA   | 0  | 0 | Not-determined | Genome-fragment | NA | 0     |
| 58_extracted_k141_189196    | 2110  | No  | NA   | 0  | 3 | Not-determined | Genome-fragment | NA | 0     |
| 58_extracted_k141_42569     | 1091  | No  | NA   | 0  | 1 | Not-determined | Genome-fragment | NA | 0     |
| 58_extracted_k141_16254     | 1359  | No  | NA   | 0  | 1 | Not-determined | Genome-fragment | NA | 0     |
| 58_extracted_k141_16257     | 1511  | No  | NA   | 0  | 0 | Not-determined | Genome-fragment | NA | 0     |
| 58_extracted_k141_77353     | 2890  | No  | NA   | 0  | 4 | Not-determined | Genome-fragment | NA | 0     |
| 58_extracted_k141_189199    | 4917  | No  | NA   | 0  | 2 | Not-determined | Genome-fragment | NA | 0     |
| 58_extracted_k141_112291    | 2895  | No  | NA   | 0  | 1 | Not-determined | Genome-fragment | NA | 0     |
| 55_extracted_k141_62924     | 10032 | No  | NA   | 4  | 0 | Low-quality    | Genome-fragment | NA | 21.63 |
| 58_extracted_k141_25515     | 2544  | No  | NA   | 0  | 1 | Not-determined | Genome-fragment | NA | 0     |
| 58_extracted_k141_207066    | 1365  | No  | NA   | 0  | 2 | Not-determined | Genome-fragment | NA | 0     |
| 58_extracted_k141_25523     | 1294  | No  | NA   | 0  | 1 | Not-determined | Genome-fragment | NA | 0     |
| 58_extracted_k141_77369     | 2736  | No  | NA   | 0  | 2 | Not-determined | Genome-fragment | NA | 0     |
| 58_extracted_k141_173050    | 1252  | No  | NA   | 0  | 1 | Not-determined | Genome-fragment | NA | 0     |
| 58_extracted_k141_42598     | 1204  | No  | NA   | 0  | 1 | Not-determined | Genome-fragment | NA | 0     |
| 512_vs_k141_53871[full]     | 10040 | No  | NA   | 0  | 5 | Low-quality    | Genome-fragment | NA | 5.38  |
| 58_extracted_k141_103161    | 3277  | No  | NA   | 0  | 1 | Not-determined | Genome-fragment | NA | 0     |
| 55_vs_k141_69010[full]      | 10050 | No  | NA   | 3  | 0 | Low-quality    | Genome-fragment | NA | 20.94 |
| 53_vs_k141_17492[full]      | 10052 | No  | NA   | 2  | 0 | Low-quality    | Genome-fragment | NA | 23.11 |
| 58_extracted_k141_60457     | 1671  | No  | NA   | 0  | 1 | Not-determined | Genome-fragment | NA | 0     |
| 58_extracted_k141_181837    | 2733  | No  | NA   | 0  | 1 | Not-determined | Genome-fragment | NA | 0     |
| 58_extracted_k141_42608     | 3560  | No  | NA   | 0  | 1 | Not-determined | Genome-fragment | NA | 0     |
| 58_extracted_k141_50470     | 1504  | No  | NA   | 0  | 1 | Not-determined | Genome-fragment | NA | 0     |
| 58_extracted_k141_112354    | 1284  | No  | NA   | 0  | 1 | Not-determined | Genome-fragment | NA | 0     |
| 58_extracted_k141_147008    | 3746  | No  | NA   | 0  | 1 | Not-determined | Genome-fragment | NA | 0     |
| 58_extracted_k141_199278    | 1514  | No  | NA   | 0  | 2 | Not-determined | Genome-fragment | NA | 0     |
| 58_extracted_k141_94686     | 3926  | No  | NA   | 0  | 0 | Not-determined | Genome-fragment | NA | 0     |
| 510_vs_10068[full]          | 10056 | No  | NA   | 2  | 1 | Low-quality    | Genome-fragment | NA | 3.29  |
| 58_extracted_k141_16322     | 2310  | No  | NA   | 0  | 1 | Not-determined | Genome-fragment | NA | 0     |
| 58_extracted_k141_86067     | 2510  | No  | NA   | 0  | 1 | Not-determined | Genome-fragment | NA | 0     |
| 58_extracted_k141_189245    | 5781  | No  | NA   | 0  | 5 | Not-determined | Genome-fragment | NA | 0     |
| 58_extracted_k141_34315     | 2345  | No  | NA   | 0  | 1 | Not-determined | Genome-fragment | NA | 0     |
| 58_extracted_k141_15517     | 1176  | No  | NA   | 0  | 1 | Not-determined | Genome-fragment | NA | 0     |
| 58_extracted_k141_181858    | 11424 | No  | NA   | 0  | 6 | Not-determined | Genome-fragment | NA | 0     |
| 58_extracted_k141_77420     | 1909  | No  | NA   | 0  | 0 | Not-determined | Genome-fragment | NA | 0     |
| 53_vs_k141_91100[full]      | 10063 | No  | NA   | 5  | 2 | Low-quality    | Genome-fragment | NA | 25.71 |
| 55_extracted_k141_30691     | 10076 | No  | NA   | 4  | 0 | Low-quality    | Genome-fragment | NA | 22.17 |
| 58_extracted_k141_173101    | 1040  | No  | NA   | 0  | 1 | Not-determined | Genome-fragment | NA | 0     |
| 58_extracted_k141_94715     | 1224  | No  | NA   | 0  | 1 | Not-determined | Genome-fragment | NA | 0     |
| 58_extracted_k141_77436     | 4447  | No  | NA   | 0  | 1 | Not-determined | Genome-fragment | NA | 0     |
| 58_extracted_k141_16356     | 1690  | No  | NA   | 0  | 0 | Not-determined | Genome-fragment | NA | 0     |
| 53_vs_k141_16836[full]      | 10081 | No  | NA   | 3  | 0 | Low-quality    | Genome-fragment | NA | 12.77 |
| 58_extracted_k141_147048    | 1417  | No  | NA   | 0  | 0 | Not-determined | Genome-fragment | NA | 0     |
| 58_extracted_k141_155219    | 1814  | No  | NA   | 0  | 0 | Not-determined | Genome-fragment | NA | 0     |
| 58_extracted_k141_207147    | 2470  | No  | NA   | 0  | 2 | Not-determined | Genome-fragment | NA | 0     |
| 58_extracted_k141_163760    | 16437 | No  | NA   | 33 | 0 | Complete       | High-quality    | NA | 100   |
| 58_extracted_k141_17294     | 10081 | No  | NA   | 19 | 0 | Low-quality    | Genome-fragment | NA | 33.19 |
| 58_extracted_k141_34352     | 2610  | No  | NA   | 0  | 1 | Not-determined | Genome-fragment | NA | 0     |
| 511_vs_k141_16721[full]     | 10084 | No  | NA   | 0  | 1 | Low-quality    | Genome-fragment | NA | 22.63 |
| 58_extracted_k141_25576     | 1140  | No  | NA   | 0  | 0 | Not-determined | Genome-fragment | NA | 0     |
| 58_extracted_k141_77468     | 1068  | No  | NA   | 0  | 2 | Not-determined | Genome-fragment | NA | 0     |
| 58_extracted_k141_199341    | 1236  | No  | NA   | 0  | 1 | Not-determined | Genome-fragment | NA | 0     |
| 58_extracted_k141_94767     | 1217  | No  | NA   | 0  | 1 | Not-determined | Genome-fragment | NA | 0     |
| 58_extracted_k141_16403     | 1574  | No  | NA   | 0  | 0 | Not-determined | Genome-fragment | NA | 0     |
| 58_extracted_k141_60300     | 1967  | No  | NA   | 0  | 1 | Not-determined | Genome-fragment | NA | 0     |
| 58_extracted_k141_50652     | 1563  | No  | NA   | 0  | 1 | Not-determined | Genome-fragment | NA | 0     |
| 58_extracted_k141_163781    | 4904  | No  | NA   | 0  | 2 | Not-determined | Genome-fragment | NA | 0     |
| 58_extracted_k141_207175    | 3345  | No  | NA   | 0  | 1 | Not-determined | Genome-fragment | NA | 0     |
| 58_extracted_k141_155244    | 2237  | No  | NA   | 0  | 0 | Not-determined | Genome-fragment | NA | 0     |
| 58_extracted_k141_94776     | 1123  | No  | NA   | 0  | 0 | Not-determined | Genome-fragment | NA | 0     |
| 58_extracted_k141_16413     | 1082  | No  | NA   | 0  | 1 | Not-determined | Genome-fragment | NA | 0     |
| 58_extracted_k141_68538     | 2537  | No  | NA   | 0  | 1 | Not-determined | Genome-fragment | NA | 0     |
| 58_extracted_k141_155255    | 3213  | No  | NA   | 0  | 1 | Not-determined | Genome-fragment | NA | 0     |
| 58_extracted_k141_138122    | 1109  | No  | NA   | 0  | 0 | Not-determined | Genome-fragment | NA | 0     |
| 58_extracted_k141_207193    | 1306  | No  | NA   | 0  | 0 | Not-determined | Genome-fragment | NA | 0     |
| 58_extracted_k141_163811    | 1651  | No  | NA   | 0  | 1 | Not-determined | Genome-fragment | NA | 0     |
| 510_extracted_77432         | 10084 | No  | NA   | 2  | 0 | Low-quality    | Genome-fragment | NA | 7.41  |
| 516_vs_156623[full]         | 10086 | No  | NA   | 1  | 0 | Low-quality    | Genome-fragment | NA | 29.72 |
| 516_vs_154451[full]         | 10094 | No  | NA   | 6  | 0 | Low-quality    | Genome-fragment | NA | 28.58 |
| 58_extracted_k141_255637    | 2676  | No  | NA   | 0  | 2 | Not-determined | Genome-fragment | NA | 0     |
| 58_extracted_k141_42733     | 3781  | No  | NA   | 0  | 1 | Not-determined | Genome-fragment | NA | 0     |
| 58_extracted_k141_77542     | 1449  | No  | NA   | 0  | 2 | Not-determined | Genome-fragment | NA | 0     |
| 55_vs_k141_25113[full]      | 10100 | No  | NA   | 0  | 0 | Low-quality    | Genome-fragment | NA | 22.92 |
| 58_extracted_k141_129589    | 3301  | No  | NA   | 0  | 1 | Not-determined | Genome-fragment | NA | 0     |
| 58_extracted_k141_86152     | 3422  | No  | NA   | 0  | 2 | Not-determined | Genome-fragment | NA | 0     |
| 58_extracted_k141_17319     | 6980  | No  | NA   | 0  | 1 | Not-determined | Genome-fragment | NA | 0     |
| 58_extracted_k141_86159     | 2719  | No  | NA   | 0  | 2 | Not-determined | Genome-fragment | NA | 0     |
| 58_extracted_k141_199397    | 1124  | No  | NA   | 0  | 1 | Not-determined | Genome-fragment | NA | 0     |
| 58_extracted_k141_173206    | 1472  | No  | NA   | 0  | 1 | Not-determined | Genome-fragment | NA | 0     |
| 55_vs_k141_12420[0_partial] | 10104 | Yes | 8984 | 2  | 0 | Low-quality    | Genome-fragment | NA | 27.69 |
| 58_extracted_k141_199405    | 1568  | No  | NA   | 0  | 3 | Not-determined | Genome-fragment | NA | 0     |
| 58_extracted_k141_50699     | 7961  | No  | NA   | 0  | 1 | Not-determined | Genome-fragment | NA | 0     |
| 58_extracted_k141_138184    | 1304  | No  | NA   | 0  | 1 | Not-determined | Genome-fragment | NA | 0     |
| 58_extracted_k141_138186    | 1161  | No  | NA   | 0  | 0 | Not-determined | Genome-fragment | NA | 0     |
| 58_extracted_k141_155323    | 1207  | No  | NA   | 0  | 1 | Not-determined | Genome-fragment | NA | 0     |
| 517_vs_k141_112946[full]    | 10114 | No  | NA   | 1  | 0 | Low-quality    | Genome-fragment | NA | 5.67  |
| 58_extracted_k141_16487     | 2326  | No  | NA   | 0  | 2 | Not-determined | Genome-fragment | NA | 0     |
| 55_vs_k141_125961[full]     | 10115 | No  | NA   | 2  | 1 | Low-quality    | Genome-fragment | NA | 26.87 |
| 58_extracted_k141_138189    | 2070  | No  | NA   | 0  | 1 | Not-determined | Genome-fragment | NA | 0     |
| 58_extracted_k141_34462     | 1867  | No  | NA   | 0  | 2 | Not-determined | Genome-fragment | NA | 0     |
| 58_extracted_k141_68611     | 1163  | No  | NA   | 0  | 1 | Not-determined | Genome-fragment | NA | 0     |
| 58_extracted_k141_112493    | 2708  | No  | NA   | 0  | 2 | Not-determined | Genome-fragment | NA | 0     |
| 58_extracted_k141_181887    | 1403  | No  | NA   | 0  | 1 | Not-determined | Genome-fragment | NA | 0     |
| 58_extracted_k141_129614    | 2761  | No  | NA   | 0  | 0 | Not-determined | Genome-fragment | NA | 0     |
| 52_extracted_k141_4058      | 10119 | No  | NA   | 4  | 0 | Low-quality    | Genome-fragment | NA | 19.24 |
| 58_extracted_k141_120791    | 1771  | No  | NA   | 0  | 0 | Not-determined | Genome-fragment | NA | 0     |
| 58_extracted_k141_199422    | 4690  | No  | NA   | 0  | 2 | Not-determined | Genome-fragment | NA | 0     |
| 58_extracted_k141_129624    | 1353  | No  | NA   | 0  | 2 | Not-determined | Genome-fragment | NA | 0     |
| 58_extracted_k141_77596     | 1341  | No  | NA   | 0  | 0 | Not-determined | Genome-fragment | NA | 0     |
| 58_extracted_k141_68637     | 1130  | No  | NA   | 0  | 0 | Not-determined | Genome-fragment | NA | 0     |
| 58_extracted_k141_199433    | 1029  | No  | NA   | 0  | 2 | Not-determined | Genome-fragment | NA | 0     |
| 58_extracted_k141_42773     | 1719  | No  | NA   | 0  | 2 | Not-determined | Genome-fragment | NA | 0     |
| 58_extracted_k141_163883    | 2858  | No  | NA   | 0  | 1 | Not-determined | Genome-fragment | NA | 0     |
| 58_extracted_k141_16511     | 1185  | No  | NA   | 0  | 1 | Not-determined | Genome-fragment | NA | 0     |
| 5                           |       |     |      |    |   |                |                 |    |       |



|                            |       |     |      |    |   |                |                 |    |       |
|----------------------------|-------|-----|------|----|---|----------------|-----------------|----|-------|
| 58_extracted_k141_77698    | 6343  | No  | NA   | 0  | 6 | Not-determined | Genome-fragment | NA | 0     |
| 58_extracted_k141_48300    | 1010  | No  | NA   | 0  | 0 | Not-determined | Genome-fragment | NA | 0     |
| 517_vs_k141_35788  full    | 10182 | No  | NA   | 5  | 0 | Low-quality    | Genome-fragment | NA | 22.75 |
| 58_extracted_k141_120906   | 1527  | No  | NA   | 0  | 1 | Not-determined | Genome-fragment | NA | 0     |
| 57_vs_32030  full          | 10183 | No  | NA   | 3  | 0 | Low-quality    | Genome-fragment | NA | 17.28 |
| 513_vs_51840  full         | 10187 | No  | NA   | 0  | 1 | Low-quality    | Genome-fragment | NA | 6.89  |
| 58_extracted_k141_163980   | 1005  | No  | NA   | 0  | 1 | Not-determined | Genome-fragment | NA | 0     |
| 58_extracted_k141_120909   | 2483  | No  | NA   | 0  | 1 | Not-determined | Genome-fragment | NA | 0     |
| 58_extracted_k141_129971   | 2028  | No  | NA   | 0  | 2 | Not-determined | Genome-fragment | NA | 0     |
| 58_extracted_k141_86284    | 2412  | No  | NA   | 0  | 1 | Not-determined | Genome-fragment | NA | 0     |
| 58_extracted_k141_199528   | 1574  | No  | NA   | 0  | 1 | Not-determined | Genome-fragment | NA | 0     |
| 58_extracted_k141_199513   | 1549  | No  | NA   | 0  | 1 | Not-determined | Genome-fragment | NA | 0     |
| 58_extracted_k141_60628    | 3568  | No  | NA   | 0  | 1 | Not-determined | Genome-fragment | NA | 0     |
| 514_vs_k141_89890  partial | 10201 | No  | NA   | 3  | 0 | Low-quality    | Genome-fragment | NA | 35.56 |
| 58_extracted_k141_173225   | 98174 | No  | NA   | 29 | 2 | High-quality   | High-quality    | NA | 94.9  |
| 58_extracted_k141_182116   | 1541  | No  | NA   | 0  | 1 | Not-determined | Genome-fragment | NA | 0     |
| 58_extracted_k141_207357   | 1147  | No  | NA   | 0  | 0 | Not-determined | Genome-fragment | NA | 0     |
| 510_extracted_12123        | 10217 | No  | NA   | 4  | 0 | Low-quality    | Genome-fragment | NA | 14.86 |
| 58_extracted_k141_68713    | 1062  | No  | NA   | 0  | 0 | Not-determined | Genome-fragment | NA | 0     |
| 58_extracted_k141_8377     | 3287  | No  | NA   | 0  | 1 | Not-determined | Genome-fragment | NA | 0     |
| 58_extracted_k141_155424   | 1074  | No  | NA   | 0  | 0 | Not-determined | Genome-fragment | NA | 0     |
| 58_extracted_k141_8379     | 3394  | No  | NA   | 0  | 3 | Not-determined | Genome-fragment | NA | 0     |
| 58_extracted_k141_8380     | 1723  | No  | NA   | 0  | 1 | Not-determined | Genome-fragment | NA | 0     |
| 58_extracted_k141_60656    | 1464  | No  | NA   | 0  | 0 | Not-determined | Genome-fragment | NA | 0     |
| 58_extracted_k141_16634    | 1897  | No  | NA   | 0  | 2 | Not-determined | Genome-fragment | NA | 0     |
| 58_extracted_k141_50778    | 3813  | No  | NA   | 0  | 1 | Not-determined | Genome-fragment | NA | 0     |
| 58_extracted_k141_155438   | 2093  | No  | NA   | 0  | 2 | Not-determined | Genome-fragment | NA | 0     |
| 58_extracted_k141_103472   | 3499  | No  | NA   | 0  | 2 | Not-determined | Genome-fragment | NA | 0     |
| 58_extracted_k141_50784    | 1200  | No  | NA   | 0  | 1 | Not-determined | Genome-fragment | NA | 0     |
| 58_extracted_k141_103475   | 1501  | No  | NA   | 0  | 2 | Not-determined | Genome-fragment | NA | 0     |
| 512_vs_k141_57765  full    | 10218 | No  | NA   | 5  | 1 | Low-quality    | Genome-fragment | NA | 22.77 |
| 58_vs_k141_47554  full     | 10219 | No  | NA   | 0  | 0 | Low-quality    | Genome-fragment | NA | 25.5  |
| 58_extracted_k141_155451   | 1082  | No  | NA   | 0  | 1 | Not-determined | Genome-fragment | NA | 0     |
| 58_extracted_k141_164022   | 4086  | No  | NA   | 0  | 0 | Not-determined | Genome-fragment | NA | 0     |
| 58_extracted_k141_129764   | 3964  | No  | NA   | 0  | 1 | Not-determined | Genome-fragment | NA | 0     |
| 58_extracted_k141_77771    | 1229  | No  | NA   | 0  | 1 | Not-determined | Genome-fragment | NA | 0     |
| 58_extracted_k141_155460   | 1533  | No  | NA   | 0  | 2 | Not-determined | Genome-fragment | NA | 0     |
| 58_extracted_k141_164029   | 5219  | No  | NA   | 0  | 4 | Not-determined | Genome-fragment | NA | 0     |
| 58_extracted_k141_86360    | 3281  | No  | NA   | 0  | 4 | Not-determined | Genome-fragment | NA | 0     |
| 58_extracted_k141_16674    | 1573  | No  | NA   | 0  | 4 | Not-determined | Genome-fragment | NA | 0     |
| 58_extracted_k141_120961   | 4502  | No  | NA   | 0  | 4 | Not-determined | Genome-fragment | NA | 0     |
| 58_extracted_k141_16675    | 1876  | No  | NA   | 0  | 2 | Not-determined | Genome-fragment | NA | 0     |
| 58_extracted_k141_120971   | 1198  | No  | NA   | 0  | 2 | Not-determined | Genome-fragment | NA | 0     |
| 53_extracted_k141_108724   | 10213 | No  | NA   | 1  | 0 | Low-quality    | Genome-fragment | NA | 27.72 |
| 58_extracted_k141_60715    | 1326  | No  | NA   | 0  | 0 | Not-determined | Genome-fragment | NA | 0     |
| 58_extracted_k141_86377    | 1117  | No  | NA   | 0  | 2 | Not-determined | Genome-fragment | NA | 0     |
| 58_extracted_k141_8439     | 1007  | No  | NA   | 0  | 0 | Not-determined | Genome-fragment | NA | 0     |
| 58_extracted_k141_155485   | 1201  | No  | NA   | 0  | 1 | Not-determined | Genome-fragment | NA | 0     |
| 58_extracted_k141_34610    | 3638  | No  | NA   | 0  | 1 | Not-determined | Genome-fragment | NA | 0     |
| 58_extracted_k141_155487   | 1911  | No  | NA   | 0  | 2 | Not-determined | Genome-fragment | NA | 0     |
| 58_extracted_k141_164045   | 1883  | No  | NA   | 0  | 0 | Not-determined | Genome-fragment | NA | 0     |
| 58_extracted_k141_120986   | 1342  | No  | NA   | 0  | 1 | Not-determined | Genome-fragment | NA | 0     |
| 58_extracted_k141_147247   | 1388  | No  | NA   | 0  | 0 | Not-determined | Genome-fragment | NA | 0     |
| 516_vs_113020  partial     | 10240 | No  | NA   | 1  | 7 | Low-quality    | Genome-fragment | NA | 6.63  |
| 58_extracted_k141_68788    | 6213  | No  | NA   | 5  | 5 | Not-determined | Genome-fragment | NA | 0     |
| 58_extracted_k141_182198   | 3614  | No  | NA   | 0  | 0 | Not-determined | Genome-fragment | NA | 0     |
| 58_extracted_k141_173275   | 1261  | No  | NA   | 0  | 1 | Not-determined | Genome-fragment | NA | 0     |
| 58_extracted_k141_8457     | 1802  | No  | NA   | 0  | 1 | Not-determined | Genome-fragment | NA | 0     |
| 58_extracted_k141_118365   | 1482  | No  | NA   | 0  | 0 | Not-determined | Genome-fragment | NA | 0     |
| 58_extracted_k141_8458     | 1369  | No  | NA   | 0  | 0 | Not-determined | Genome-fragment | NA | 0     |
| 58_extracted_k141_164062   | 4218  | No  | NA   | 0  | 3 | Not-determined | Genome-fragment | NA | 0     |
| 58_extracted_k141_42896    | 1420  | No  | NA   | 0  | 1 | Not-determined | Genome-fragment | NA | 0     |
| 58_extracted_k141_164066   | 1078  | No  | NA   | 0  | 1 | Not-determined | Genome-fragment | NA | 0     |
| 58_extracted_k141_147256   | 3845  | No  | NA   | 0  | 0 | Not-determined | Genome-fragment | NA | 0     |
| 58_extracted_k141_16699    | 1183  | No  | NA   | 0  | 0 | Not-determined | Genome-fragment | NA | 0     |
| 58_extracted_k141_173282   | 1075  | No  | NA   | 0  | 0 | Not-determined | Genome-fragment | NA | 0     |
| 58_extracted_k141_164067   | 3297  | No  | NA   | 0  | 3 | Not-determined | Genome-fragment | NA | 0     |
| 510_extracted_85124        | 10242 | No  | NA   | 1  | 1 | Low-quality    | Genome-fragment | NA | 5.56  |
| 51_vs_k141_88248  full     | 10251 | No  | NA   | 1  | 1 | Low-quality    | Genome-fragment | NA | 2.75  |
| 58_extracted_k141_8462     | 6187  | No  | NA   | 0  | 1 | Not-determined | Genome-fragment | NA | 0     |
| 58_extracted_k141_16709    | 2342  | No  | NA   | 0  | 0 | Not-determined | Genome-fragment | NA | 0     |
| 58_extracted_k141_86423    | 1264  | No  | NA   | 0  | 1 | Not-determined | Genome-fragment | NA | 0     |
| 58_extracted_k141_147271   | 4199  | No  | NA   | 0  | 2 | Not-determined | Genome-fragment | NA | 0     |
| 58_extracted_k141_207446   | 1604  | No  | NA   | 0  | 1 | Not-determined | Genome-fragment | NA | 0     |
| 58_extracted_k141_173296   | 4397  | No  | NA   | 0  | 1 | Not-determined | Genome-fragment | NA | 0     |
| 58_extracted_k141_77843    | 1458  | No  | NA   | 0  | 2 | Not-determined | Genome-fragment | NA | 0     |
| 58_extracted_k141_189690   | 1067  | No  | NA   | 0  | 0 | Not-determined | Genome-fragment | NA | 0     |
| 58_extracted_k141_121044   | 3118  | No  | NA   | 0  | 2 | Not-determined | Genome-fragment | NA | 0     |
| 58_extracted_k141_8494     | 2165  | No  | NA   | 0  | 0 | Not-determined | Genome-fragment | NA | 0     |
| 58_extracted_k141_8495     | 1621  | No  | NA   | 0  | 2 | Not-determined | Genome-fragment | NA | 0     |
| 58_extracted_k141_207472   | 3625  | No  | NA   | 0  | 0 | Not-determined | Genome-fragment | NA | 0     |
| 57_extracted_7174          | 10257 | Yes | 6001 | 3  | 1 | Low-quality    | Genome-fragment | NA | 10.41 |
| 53_extracted_k141_121700   | 10260 | No  | NA   | 3  | 3 | Low-quality    | Genome-fragment | NA | 41.49 |
| 58_extracted_k141_68853    | 3116  | No  | NA   | 0  | 3 | Not-determined | Genome-fragment | NA | 11.04 |
| 58_extracted_k141_3727     | 10260 | No  | NA   | 6  | 0 | Low-quality    | Genome-fragment | NA | 17.13 |
| 58_extracted_k141_155568   | 4178  | No  | NA   | 0  | 2 | Not-determined | Genome-fragment | NA | 0     |
| 511_extracted_k141_13962   | 10265 | No  | NA   | 7  | 0 | Low-quality    | Genome-fragment | NA | 21.4  |
| 58_extracted_k141_173325   | 1487  | No  | NA   | 0  | 1 | Not-determined | Genome-fragment | NA | 0     |
| 58_extracted_k141_103616   | 1053  | No  | NA   | 0  | 1 | Not-determined | Genome-fragment | NA | 0     |
| 58_extracted_k141_68877    | 1784  | No  | NA   | 0  | 1 | Not-determined | Genome-fragment | NA | 0     |
| 58_extracted_k141_164116   | 3424  | No  | NA   | 0  | 2 | Not-determined | Genome-fragment | NA | 0     |
| 58_extracted_k141_103621   | 1116  | No  | NA   | 0  | 1 | Not-determined | Genome-fragment | NA | 0     |
| 58_extracted_k141_68880    | 1618  | No  | NA   | 0  | 3 | Not-determined | Genome-fragment | NA | 0     |
| 58_extracted_k141_189742   | 4474  | No  | NA   | 0  | 2 | Not-determined | Genome-fragment | NA | 0     |
| 58_extracted_k141_121110   | 1473  | No  | NA   | 0  | 0 | Not-determined | Genome-fragment | NA | 0     |
| 58_extracted_k141_121112   | 1143  | No  | NA   | 0  | 1 | Not-determined | Genome-fragment | NA | 0     |
| 58_extracted_k141_86527    | 1238  | No  | NA   | 0  | 0 | Not-determined | Genome-fragment | NA | 0     |
| 58_extracted_k141_129937   | 1161  | No  | NA   | 0  | 1 | Not-determined | Genome-fragment | NA | 0     |
| 58_extracted_k141_8661     | 2766  | No  | NA   | 0  | 1 | Not-determined | Genome-fragment | NA | 0     |
| 58_extracted_k141_138483   | 1455  | No  | NA   | 0  | 0 | Not-determined | Genome-fragment | NA | 0     |
| 511_vs_k141_8230  full     | 10282 | No  | NA   | 0  | 4 | Low-quality    | Genome-fragment | NA | 18.32 |
| 55_vs_k141_11114  full     | 10282 | No  | NA   | 0  | 0 | Low-quality    | Genome-fragment | NA | 10.36 |
| 58_extracted_k141_147338   | 34542 | No  | NA   | 17 | 0 | Medium-quality | Genome-fragment | NA | 52.69 |
| 58_extracted_k141_207527   | 4080  | No  | NA   | 0  | 3 | Not-determined | Genome-fragment | NA | 0     |
| 58_extracted_k141_155617   | 1711  | No  | NA   | 0  | 0 | Not-determined | Genome-fragment | NA | 0     |
| 55_vs_k141_144329  full    | 10312 | No  | NA   | 0  | 1 | Low-quality    | Genome-fragment | NA | 13.19 |
| 510_vs_78757  full         | 10314 | No  | NA   | 2  | 1 | Low-quality    | Genome-fragment | NA | 27.05 |
| 58_extracted_k141_86568    | 1192  | No  | NA   | 0  | 1 | Not-determined | Genome-fragment | NA | 0     |
| 53_extracted_k141_79427    | 10321 | No  | NA   | 0  | 0 | Low-quality    | Genome-fragment | NA | 5.88  |
| 58_extracted_k141_103678   | 2430  | No  | NA   | 0  | 1 | Not-determined | Genome-fragment | NA | 0     |
| 58_extracted_k141_43046    | 1045  | No  | NA   | 0  | 0 | Not-determined | Genome-fragment | NA | 0     |
| 58_extracted_k141_173361   | 1166  | No  | NA   | 0  | 0 | Not-determined | Genome-fragment | NA | 0     |
| 58_extracted_k141_207546   | 2004  | No  | NA   | 0  | 1 | Not-determined | Genome-fragment | NA | 0     |
| 512_vs_k141_31501  full    | 10324 | No  | NA   | 0  | 0 | Low-quality    | Genome-fragment | NA | 6.49  |
| 58_extracted_k141_50910    | 1009  | No  | NA   | 0  | 1 | Not-determined | Genome-fragment | NA | 0     |
| 58_extracted_k141_207553   | 1339  | No  | NA   | 0  | 1 | Not-determined | Genome-fragment | NA | 0     |
| 58_extracted_k141_112613   | 8135  | No  | NA   | 0  | 3 | Not-determined | Genome-fragment | NA | 0     |
| 58_extracted_k141_8617     | 1021  | No  | NA   | 0  | 0 | Not-determined | Genome-fragment | NA | 0     |
| 58_extracted_k141_115643   | 11633 | No  | NA   | 0  | 0 | Not-determined | Genome-fragment | NA | 0     |
| 515_vs_35452  full         | 10325 | Yes | 2710 | 2  | 5 | Low-quality    | Genome-fragment | NA | 1.2   |
| 58_extracted_k141_121205   | 1212  | No  | NA   | 0  | 1 | Not-determined | Genome-fragment | NA | 73.75 |
| 58_extracted_k141_188771   | 2136  | No  | NA   | 0  | 1 | Not-determined | Genome-fragment | NA | 0     |
| 58_extracted_k141_207572   | 1178  | No  | NA   | 0  | 3 | Not-determined | Genome-fragment | NA | 0     |
| 58_extracted_k141_112636   | 1115  | No  | NA   | 0  | 1 | Not-determined | Genome-fragment | NA | 0     |
| 58_extracted_k141_147384   | 1243  | No  | NA   | 0  | 1 | Not-determined | Genome-fragment | NA | 0     |
| 58_extracted_k141_8658     | 3713  | No  | NA   | 0  | 4 | Not-determined | Genome-fragment | NA | 0     |
| 58_extracted_k141_16872    | 5921  | No  | NA   | 0  | 0 | Not-determined | Genome-fragment | NA | 0     |
| 58_extracted_k141_68982    | 3542  | No  | NA   | 0  | 3 | Not-determined | Genome-fragment | NA | 0     |
| 58_extracted_k141_43080    | 1493  | No  | NA   | 0  | 0 | Not-determined | Genome-fragment | NA | 0     |
| 516_vs_10896  full         | 10327 | No  | NA   | 1  | 0 | Low-quality    | Genome-fragment | NA | 23.46 |
| 58_vs_k141_9733  full      | 10329 | No  | NA   | 3  | 1 | Low-quality    | Genome-fragment | NA | 26.58 |
| 58_extracted_k141_69005    | 7811  | No  | NA   | 0  | 2 | Not-determined | Genome-fragment | NA | 0     |
| 58_extracted_k141_103757   | 1208  | No  | NA   | 0  | 1 | Not-determined | Genome-fragment | NA | 0     |
| 58_extracted_k141_207603   | 1780  | No  | NA   | 0  | 1 | Not-determined | Genome-fragment | NA | 0     |
| 58_extracted_k141_147421   | 1334  | No  | NA   | 0  | 0 | Not-determined | Genome-fragment | NA | 0     |
| 58_extracted_k141_69017    | 1222  | No  | NA   | 0  | 1 | Not-determined | Genome-fragment | NA | 0     |
| 58_extracted_k141_164243   | 1222  | No  | NA   | 0  | 0 | Not-determined | Genome-fragment | NA | 0     |
| 58_extracted_k141_25989    | 2009  | No  | NA   | 0  | 1 | Not-determined | Genome-fragment | NA | 0     |
| 58_extracted_k141_16903    | 1540  | No  | NA   | 0  | 1 | Not-determined | Genome-fragment | NA | 0     |
| 58_extracted_k141_25991    | 1060  | No  | NA   | 0  | 0 | Not-determined | Genome-fragment | NA | 0     |
| 516_extracted_111664       | 10332 | No  | NA   | 4  | 0 | Low-quality    | Genome-fragment | NA | 26.08 |
| 513_vs_56827  full         | 10337 | No  | NA   | 1  | 0 | Low-quality    | Genome-fragment | NA | 26.33 |
| 58_extracted_k141_207614   | 1076  | No  | NA   | 0  | 1 | Not-determined | Genome-fragment | NA | 0     |
| 58_extracted_k141_51001    | 1544  | No  |      |    |   |                |                 |    |       |



|                             |        |     |       |    |    |                |                 |       |       |
|-----------------------------|--------|-----|-------|----|----|----------------|-----------------|-------|-------|
| S3_extracted_k141_41435     | 10361  | No  | NA    | 4  | 0  | Low-quality    | Genome-fragment | 18.53 | 0     |
| S3_extracted_k141_112778    | 1428   | No  | NA    | 0  | 0  | Not-determined | Genome-fragment | NA    | 0     |
| S8_extracted_k141_43195     | 1306   | No  | NA    | 0  | 0  | Not-determined | Genome-fragment | NA    | 0     |
| S8_extracted_k141_112786    | 1313   | No  | NA    | 0  | 0  | Not-determined | Genome-fragment | NA    | 0     |
| S8_extracted_k141_189900    | 1041   | No  | NA    | 0  | 1  | Not-determined | Genome-fragment | NA    | 0     |
| S8_extracted_k141_111350    | 2316   | No  | NA    | 0  | 0  | Not-determined | Genome-fragment | NA    | 0     |
| S8_extracted_k141_173508    | 1223   | No  | NA    | 0  | 1  | Not-determined | Genome-fragment | NA    | 0     |
| S8_extracted_k141_69134     | 1378   | No  | NA    | 0  | 1  | Not-determined | Genome-fragment | NA    | 0     |
| S8_extracted_k141_95350     | 1089   | No  | NA    | 0  | 0  | Not-determined | Genome-fragment | NA    | 0     |
| S8_extracted_k141_207692    | 2801   | No  | NA    | 0  | 1  | Not-determined | Genome-fragment | NA    | 0     |
| S8_extracted_k141_95353     | 1582   | No  | NA    | 0  | 2  | Not-determined | Genome-fragment | NA    | 0     |
| S8_extracted_k141_121391    | 1261   | No  | NA    | 0  | 1  | Not-determined | Genome-fragment | NA    | 0     |
| S8_extracted_k141_164378    | 1061   | No  | NA    | 0  | 0  | Not-determined | Genome-fragment | NA    | 0     |
| S8_extracted_k141_173533    | 1567   | No  | NA    | 0  | 1  | Not-determined | Genome-fragment | NA    | 0     |
| S8_extracted_k141_121397    | 3063   | No  | NA    | 0  | 2  | Not-determined | Genome-fragment | NA    | 0     |
| S8_extracted_k141_95371     | 3122   | No  | NA    | 0  | 3  | Not-determined | Genome-fragment | NA    | 0     |
| S8_extracted_k141_164385    | 5740   | No  | NA    | 0  | 0  | Not-determined | Genome-fragment | NA    | 0     |
| S10_extracted_99263         | 10361  | No  | NA    | 4  | 0  | Low-quality    | Genome-fragment | 23.37 | 0     |
| S8_vs_k141_142606  full     | 10362  | No  | NA    | 1  | 6  | Low-quality    | Genome-fragment | NA    | 0     |
| S8_extracted_k141_95391     | 6182   | No  | NA    | 0  | 4  | Not-determined | Genome-fragment | NA    | 0     |
| S13_extracted_61695         | 10365  | No  | NA    | 4  | 0  | Low-quality    | Genome-fragment | 18.67 | 0     |
| S8_extracted_k141_155842    | 1790   | No  | NA    | 0  | 2  | Not-determined | Genome-fragment | NA    | 0     |
| S8_extracted_k141_95412     | 1296   | No  | NA    | 0  | 1  | Not-determined | Genome-fragment | NA    | 0     |
| S8_extracted_k141_207740    | 1115   | No  | NA    | 0  | 0  | Not-determined | Genome-fragment | NA    | 0     |
| S8_extracted_k141_138650    | 3275   | No  | NA    | 0  | 3  | Not-determined | Genome-fragment | NA    | 0     |
| S8_extracted_k141_103893    | 4574   | No  | NA    | 0  | 0  | Not-determined | Genome-fragment | NA    | 0     |
| S8_extracted_k141_95419     | 1241   | No  | NA    | 0  | 0  | Not-determined | Genome-fragment | NA    | 0     |
| S8_extracted_k141_121460    | 2807   | No  | NA    | 0  | 1  | Not-determined | Genome-fragment | NA    | 0     |
| S8_extracted_k141_121471    | 1092   | No  | NA    | 0  | 1  | Not-determined | Genome-fragment | NA    | 0     |
| S16_vs_109309  full         | 10365  | No  | NA    | 3  | 0  | Low-quality    | Genome-fragment | 18.8  | 0     |
| S17_vs_k141_1115  full      | 10380  | No  | NA    | 0  | 0  | Low-quality    | Genome-fragment | 14.47 | 0     |
| S3_extracted_k141_95353     | 10385  | No  | NA    | 1  | 0  | Low-quality    | Genome-fragment | 6.44  | 0     |
| S8_extracted_k141_190018    | 1074   | No  | NA    | 0  | 1  | Not-determined | Genome-fragment | NA    | 0     |
| S8_extracted_k141_31493     | 10390  | No  | NA    | 9  | 0  | Low-quality    | Genome-fragment | 17.37 | 0     |
| S8_extracted_k141_164452    | 2710   | No  | NA    | 0  | 2  | Not-determined | Genome-fragment | NA    | 0     |
| S11_vs_k141_805  full       | 10396  | No  | NA    | 10 | 0  | Low-quality    | Genome-fragment | 32.26 | 0     |
| S8_vs_k141_45780  full      | 10402  | Yes | 5866  | 1  | 2  | Low-quality    | Genome-fragment | 12.34 | 41.61 |
| S8_extracted_k141_164475    | 1147   | No  | NA    | 0  | 1  | Not-determined | Genome-fragment | NA    | 0     |
| S8_extracted_k141_15591     | 1483   | No  | NA    | 0  | 1  | Not-determined | Genome-fragment | NA    | 0     |
| S8_extracted_k141_69324     | 1095   | No  | NA    | 0  | 0  | Not-determined | Genome-fragment | NA    | 0     |
| S8_extracted_k141_17093     | 1381   | No  | NA    | 0  | 0  | Not-determined | Genome-fragment | NA    | 0     |
| S8_extracted_k141_190167    | 1571   | No  | NA    | 0  | 2  | Not-determined | Genome-fragment | NA    | 0     |
| S8_extracted_k141_190107    | 2098   | No  | NA    | 0  | 1  | Not-determined | Genome-fragment | NA    | 0     |
| S11_vs_k141_8421  full      | 10403  | No  | NA    | 1  | 5  | Low-quality    | Genome-fragment | 7.12  | 0     |
| S8_extracted_k141_164519    | 1059   | No  | NA    | 0  | 0  | Not-determined | Genome-fragment | NA    | 0     |
| S8_extracted_k141_41315     | 1047   | No  | NA    | 0  | 0  | Not-determined | Genome-fragment | NA    | 0     |
| S8_extracted_k141_155952    | 2885   | No  | NA    | 0  | 0  | Not-determined | Genome-fragment | NA    | 0     |
| S8_extracted_k141_69383     | 2980   | No  | NA    | 0  | 0  | Not-determined | Genome-fragment | NA    | 0     |
| S8_extracted_k141_164535    | 1941   | No  | NA    | 0  | 1  | Not-determined | Genome-fragment | NA    | 0     |
| S8_extracted_k141_155965    | 1409   | No  | NA    | 0  | 1  | Not-determined | Genome-fragment | NA    | 0     |
| S16_vs_18320  full          | 10408  | No  | NA    | 1  | 0  | Low-quality    | Genome-fragment | 19.27 | 0     |
| S8_extracted_k141_207760    | 1878   | No  | NA    | 0  | 0  | Not-determined | Genome-fragment | NA    | 0     |
| S8_vs_k141_35561  0_partial | 10408  | No  | NA    | 0  | 1  | Low-quality    | Genome-fragment | 10.87 | 0     |
| S8_extracted_k141_190177    | 2122   | No  | NA    | 0  | 1  | Not-determined | Genome-fragment | NA    | 0     |
| S8_extracted_k141_190191    | 1070   | No  | NA    | 0  | 2  | Not-determined | Genome-fragment | NA    | 0     |
| S8_extracted_k141_190207    | 1127   | No  | NA    | 0  | 0  | Not-determined | Genome-fragment | NA    | 0     |
| S8_extracted_k141_51324     | 4623   | No  | NA    | 0  | 2  | Not-determined | Genome-fragment | NA    | 0     |
| S14_extracted_k141_34371    | 10410  | No  | NA    | 9  | 0  | Low-quality    | Genome-fragment | 6.89  | 0     |
| S8_extracted_k141_51334     | 2393   | No  | NA    | 0  | 2  | Not-determined | Genome-fragment | NA    | 0     |
| S8_extracted_k141_207806    | 1783   | No  | NA    | 0  | 0  | Not-determined | Genome-fragment | NA    | 0     |
| S8_extracted_k141_51337     | 1435   | No  | NA    | 0  | 1  | Not-determined | Genome-fragment | NA    | 0     |
| S17_vs_k141_161362  full    | 10417  | No  | NA    | 0  | 0  | Low-quality    | Genome-fragment | 17.88 | 0     |
| S8_extracted_k141_51338     | 1265   | No  | NA    | 0  | 1  | Not-determined | Genome-fragment | NA    | 0     |
| S8_extracted_k141_103975    | 5198   | No  | NA    | 0  | 3  | Not-determined | Genome-fragment | NA    | 0     |
| S8_extracted_k141_103988    | 1771   | No  | NA    | 0  | 0  | Not-determined | Genome-fragment | NA    | 0     |
| S8_extracted_k141_207812    | 1076   | No  | NA    | 0  | 1  | Not-determined | Genome-fragment | NA    | 0     |
| S8_extracted_k141_17122     | 2254   | No  | NA    | 0  | 1  | Not-determined | Genome-fragment | NA    | 0     |
| S8_extracted_k141_190294    | 1401   | No  | NA    | 0  | 0  | Not-determined | Genome-fragment | NA    | 0     |
| S8_extracted_k141_207867    | 1076   | No  | NA    | 0  | 1  | Not-determined | Genome-fragment | NA    | 0     |
| S8_extracted_k141_156086    | 2025   | No  | NA    | 0  | 1  | Not-determined | Genome-fragment | NA    | 0     |
| S8_extracted_k141_17169     | 2739   | No  | NA    | 0  | 3  | Not-determined | Genome-fragment | NA    | 0     |
| S8_extracted_k141_10404     | 1148   | No  | NA    | 0  | 1  | Not-determined | Genome-fragment | NA    | 0     |
| S8_extracted_k141_156097    | 1054   | No  | NA    | 0  | 1  | Not-determined | Genome-fragment | NA    | 0     |
| S8_extracted_k141_51381     | 4302   | No  | NA    | 0  | 4  | Not-determined | Genome-fragment | NA    | 0     |
| S8_extracted_k141_207891    | 1235   | No  | NA    | 0  | 1  | Not-determined | Genome-fragment | NA    | 0     |
| S8_extracted_k141_207896    | 1510   | No  | NA    | 0  | 0  | Not-determined | Genome-fragment | NA    | 0     |
| S8_extracted_k141_207897    | 1017   | No  | NA    | 0  | 1  | Not-determined | Genome-fragment | NA    | 0     |
| S8_extracted_k141_156131    | 1090   | No  | NA    | 0  | 1  | Not-determined | Genome-fragment | NA    | 0     |
| S8_extracted_k141_17199     | 1454   | No  | NA    | 0  | 0  | Not-determined | Genome-fragment | NA    | 0     |
| S11_vs_k141_70095  full     | 10418  | Yes | 2171  | 1  | 3  | Low-quality    | Genome-fragment | 1.93  | 79.16 |
| S8_extracted_k141_164763    | 3067   | No  | NA    | 0  | 2  | Not-determined | Genome-fragment | NA    | 0     |
| S8_extracted_k141_104311    | 1118   | No  | NA    | 0  | 0  | Not-determined | Genome-fragment | NA    | 0     |
| S8_extracted_k141_51474     | 4117   | No  | NA    | 0  | 3  | Not-determined | Genome-fragment | NA    | 0     |
| S8_extracted_k141_51490     | 1318   | No  | NA    | 0  | 1  | Not-determined | Genome-fragment | NA    | 0     |
| S8_extracted_k141_171291    | 1404   | No  | NA    | 0  | 2  | Not-determined | Genome-fragment | NA    | 0     |
| S8_extracted_k141_208018    | 2170   | No  | NA    | 0  | 2  | Not-determined | Genome-fragment | NA    | 0     |
| S8_extracted_k141_17288     | 1692   | No  | NA    | 0  | 0  | Not-determined | Genome-fragment | NA    | 0     |
| S8_extracted_k141_208043    | 1071   | No  | NA    | 0  | 1  | Not-determined | Genome-fragment | NA    | 0     |
| S13_extracted_106289        | 10418  | No  | NA    | 0  | 0  | Low-quality    | Genome-fragment | 32.08 | 0     |
| S3_vs_k141_23586  full      | 10429  | No  | NA    | 6  | 0  | Low-quality    | Genome-fragment | 25.68 | 0     |
| S8_extracted_k141_208071    | 1444   | No  | NA    | 0  | 2  | Not-determined | Genome-fragment | NA    | 0     |
| S8_extracted_k141_190455    | 1146   | No  | NA    | 0  | 0  | Not-determined | Genome-fragment | NA    | 0     |
| S3_extracted_k141_24135     | 10443  | No  | NA    | 5  | 0  | Low-quality    | Genome-fragment | 30.33 | 0     |
| S8_extracted_k141_51525     | 1394   | No  | NA    | 0  | 1  | Not-determined | Genome-fragment | NA    | 0     |
| S17_vs_123018  full         | 10452  | No  | NA    | 0  | 3  | Low-quality    | Genome-fragment | 4.34  | 0     |
| S8_extracted_k141_17331     | 1394   | No  | NA    | 0  | 0  | Not-determined | Genome-fragment | NA    | 0     |
| S8_extracted_k141_190538    | 1901   | No  | NA    | 0  | 1  | Not-determined | Genome-fragment | NA    | 0     |
| S13_vs_83609  full          | 10460  | Yes | 7064  | 1  | 3  | Low-quality    | Genome-fragment | 10.69 | 32.47 |
| S8_extracted_k141_208102    | 11617  | No  | NA    | 0  | 0  | Complete       | High-quality    | 100   | 0     |
| S8_extracted_k141_51585     | 1091   | No  | NA    | 0  | 0  | Not-determined | Genome-fragment | NA    | 0     |
| S8_extracted_k141_51589     | 2397   | No  | NA    | 0  | 1  | Not-determined | Genome-fragment | NA    | 0     |
| S8_extracted_k141_190555    | 1128   | No  | NA    | 0  | 1  | Not-determined | Genome-fragment | NA    | 0     |
| S8_extracted_k141_51609     | 1120   | No  | NA    | 0  | 1  | Not-determined | Genome-fragment | NA    | 0     |
| S16_vs_113134  full         | 10461  | Yes | 6358  | 6  | 3  | Low-quality    | Genome-fragment | 15.76 | 39.22 |
| S8_vs_k141_106288  full     | 10464  | No  | NA    | 0  | 0  | Low-quality    | Genome-fragment | 26.65 | 0     |
| S8_extracted_k141_51633     | 4625   | No  | NA    | 0  | 0  | Not-determined | Genome-fragment | NA    | 0     |
| S8_extracted_k141_190597    | 1003   | No  | NA    | 0  | 1  | Not-determined | Genome-fragment | NA    | 0     |
| S8_extracted_k141_190613    | 1272   | No  | NA    | 0  | 1  | Not-determined | Genome-fragment | NA    | 0     |
| S8_extracted_k141_51671     | 1754   | No  | NA    | 0  | 1  | Not-determined | Genome-fragment | NA    | 0     |
| S8_extracted_k141_51672     | 1809   | No  | NA    | 0  | 0  | Not-determined | Genome-fragment | NA    | 0     |
| S11_vs_k141_82797  full     | 10469  | No  | NA    | 2  | 1  | Low-quality    | Genome-fragment | 26.91 | 0     |
| S8_extracted_k141_51703     | 1250   | No  | NA    | 0  | 2  | Not-determined | Genome-fragment | NA    | 0     |
| S8_extracted_k141_190749    | 1586   | No  | NA    | 0  | 1  | Not-determined | Genome-fragment | NA    | 0     |
| S8_extracted_k141_190766    | 1019   | No  | NA    | 0  | 0  | Not-determined | Genome-fragment | NA    | 0     |
| S8_extracted_k141_190776    | 1218   | No  | NA    | 0  | 0  | Not-determined | Genome-fragment | NA    | 0     |
| S8_extracted_k141_51829     | 2450   | No  | NA    | 0  | 1  | Not-determined | Genome-fragment | NA    | 0     |
| S11_extracted_k141_64640    | 10475  | No  | NA    | 1  | 0  | Low-quality    | Genome-fragment | 15.2  | 0     |
| S8_extracted_k141_51871     | 1083   | No  | NA    | 0  | 0  | Not-determined | Genome-fragment | NA    | 0     |
| S8_extracted_k141_190869    | 4988   | No  | NA    | 0  | 0  | Not-determined | Genome-fragment | NA    | 0     |
| S12_vs_k141_152583  full    | 10475  | No  | NA    | 3  | 0  | Low-quality    | Genome-fragment | 7.92  | 0     |
| S8_extracted_k141_208107    | 52072  | No  | NA    | 7  | 0  | Complete       | High-quality    | 100   | 0     |
| S8_extracted_k141_52000     | 1667   | No  | NA    | 0  | 1  | Not-determined | Genome-fragment | NA    | 0     |
| S8_extracted_k141_52007     | 2816   | No  | NA    | 0  | 1  | Not-determined | Genome-fragment | NA    | 0     |
| S8_extracted_k141_52050     | 17085  | No  | NA    | 8  | 0  | Medium-quality | Genome-fragment | 74.96 | 0     |
| S8_extracted_k141_208111    | 17476  | No  | NA    | 38 | 4  | Complete       | High-quality    | 100   | 0     |
| S8_extracted_k141_208111    | 62668  | No  | NA    | 19 | 0  | Complete       | High-quality    | 100   | 0     |
| S8_extracted_k141_208115    | 5662   | No  | NA    | 2  | 0  | Complete       | High-quality    | 100   | 0     |
| S8_extracted_k141_208116    | 5362   | No  | NA    | 0  | 0  | Not-determined | Genome-fragment | NA    | 0     |
| S8_extracted_k141_208119    | 5827   | No  | NA    | 4  | 0  | Complete       | High-quality    | 100   | 0     |
| S8_extracted_k141_208120    | 52201  | No  | NA    | 8  | 2  | Complete       | High-quality    | 100   | 0     |
| S8_extracted_k141_208126    | 44999  | No  | NA    | 31 | 0  | Complete       | High-quality    | 100   | 0     |
| S8_extracted_k141_208145    | 1953   | No  | NA    | 0  | 0  | Not-determined | Genome-fragment | NA    | 0     |
| S8_extracted_k141_208146    | 5198   | No  | NA    | 5  | 0  | Complete       | High-quality    | 100   | 0     |
| S8_extracted_k141_208152    | 7234   | No  | NA    | 0  | 0  | Not-determined | Genome-fragment | NA    | 0     |
| S8_vs_k141_156154  full     | 13913  | No  | NA    | 0  | 6  | Not-determined | Genome-fragment | NA    | 0     |
| S8_vs_k141_182288  full     | 154466 | No  | NA    | 17 | 2  | High-quality   | High-quality    | 100   | 0     |
| S8_vs_k141_9114  full       | 40244  | No  | NA    | 9  | 2  | High-quality   | High-quality    | 96.69 | 0     |
| S8_vs_k141_153081  full     | 41153  | No  | NA    | 17 | 0  | High-quality   | High-quality    | 100   | 0     |
| S8_vs_k141_156883  full     | 2723   | No  | NA    | 0  | 1  | Not-determined | Genome-fragment | NA    | 0     |
| S8_vs_k141_87809  full      | 9706   | No  | NA    | 0  | 0  | Not-determined | Genome-fragment | NA    | 0     |
| S8_vs_k141_88013  full      | 42463  | No  | NA    | 16 | 0  | High-quality   | High-quality    | 100   | 0     |
| S8_vs_k141_5987  full       | 8206   | No  | NA    | 12 | 4  | High-quality   | High-quality    | 99.97 | 0     |
| S8_vs_k141_71212  full      | 40180  | No  | NA    | 7  | 1  | High-quality   | High-quality    | 100   | 0     |
| S8_vs_k141_149700  full     | 69469  | Yes | 46061 | 25 | 16 | Medium-quality | Genome-fragment | 83.13 | 33.7  |
| S8_vs_k141_132359  full     | 657    |     |       |    |    |                |                 |       |       |



|                           |           |       |     |      |    |                |                 |                 |                 |       |       |
|---------------------------|-----------|-------|-----|------|----|----------------|-----------------|-----------------|-----------------|-------|-------|
| 58_vs_k141_78120          | [full]    | 1098  | No  | NA   | 0  | 1              | Not-determined  | Genome-fragment | NA              | 0     | 0     |
| 58_vs_k141_76081          | [full]    | 2294  | No  | NA   | 0  | 0              | Not-determined  | Genome-fragment | NA              | 0     | 0     |
| 51_vs_k141_92098          | [full]    | 10536 | No  | NA   | 3  | 0              | Low-quality     | Genome-fragment | NA              | 21.58 | 0     |
| 58_vs_k141_34765          | [full]    | 2650  | No  | NA   | 0  | 2              | Not-determined  | Genome-fragment | NA              | 0     | 0     |
| 58_vs_k141_43432          | [full]    | 1028  | No  | NA   | 0  | 0              | 1               | Not-determined  | Genome-fragment | NA    | 0     |
| 58_vs_k141_199638         | [full]    | 1986  | No  | NA   | 0  | 1              | Not-determined  | Genome-fragment | NA              | 0     | 0     |
| 516_vs_k126310            | [full]    | 10537 | No  | NA   | 1  | 1              | Low-quality     | Genome-fragment | NA              | 16.42 | 0     |
| 53_extracted_k141_122722  |           | 10549 | No  | NA   | 1  | 4              | Low-quality     | Genome-fragment | NA              | 6.42  | 0     |
| 58_vs_k141_26097          | [full]    | 1589  | No  | NA   | 0  | 0              | Not-determined  | Genome-fragment | NA              | 0     | 0     |
| 517_extracted_k141_24516  |           | 10553 | No  | NA   | 3  | 0              | Low-quality     | Genome-fragment | NA              | 32.82 | 0     |
| 55_vs_k141_125899         | [full]    | 10554 | No  | NA   | 2  | 1              | Low-quality     | Genome-fragment | NA              | 24.93 | 0     |
| 58_vs_k141_27421          | [full]    | 3635  | No  | NA   | 0  | 0              | Not-determined  | Genome-fragment | NA              | 0     | 0     |
| 58_vs_k141_199641         | [full]    | 1370  | No  | NA   | 0  | 1              | Not-determined  | Genome-fragment | NA              | 0     | 0     |
| 54_extracted_15245        |           | 10554 | No  | NA   | 6  | 0              | Low-quality     | Genome-fragment | NA              | 19.8  | 0     |
| 58_vs_k141_52143          | [full]    | 1983  | No  | NA   | 0  | 1              | Not-determined  | Genome-fragment | NA              | 0     | 0     |
| 515_vs_31651              | [full]    | 10563 | No  | NA   | 13 | 0              | Low-quality     | Genome-fragment | NA              | 30.36 | 0     |
| 511_vs_k141_47250         | [full]    | 10571 | No  | NA   | 5  | 0              | Low-quality     | Genome-fragment | NA              | 7.36  | 0     |
| 58_vs_k141_1111           | [full]    | 2222  | No  | NA   | 0  | 1              | Not-determined  | Genome-fragment | NA              | 0     | 0     |
| 57_vs_71951               | [full]    | 10573 | No  | NA   | 0  | 0              | Low-quality     | Genome-fragment | NA              | 28.22 | 0     |
| 58_vs_k141_147621         | [full]    | 4658  | No  | NA   | 0  | 4              | Not-determined  | Genome-fragment | NA              | 0     | 0     |
| 51_vs_k141_150573         | [full]    | 10589 | No  | NA   | 1  | 1              | Low-quality     | Genome-fragment | NA              | 24.72 | 0     |
| 58_vs_k141_50850          | [full]    | 6813  | No  | NA   | 0  | 4              | Not-determined  | Genome-fragment | NA              | 0.96  | 0     |
| 516_extracted_69256       |           | 10593 | No  | NA   | 3  | 0              | Low-quality     | Genome-fragment | NA              | 19.63 | 0     |
| 512_vs_k141_16106         | [full]    | 10594 | No  | NA   | 0  | 5              | Low-quality     | Genome-fragment | NA              | 6.92  | 0     |
| 52_vs_k141_67026          | [full]    | 10596 | No  | NA   | 3  | 0              | Low-quality     | Genome-fragment | NA              | 17.51 | 0     |
| 58_vs_k141_66933          | [full]    | 2975  | No  | NA   | 0  | 3              | Not-determined  | Genome-fragment | NA              | 0     | 0     |
| 58_vs_k141_52167          | [full]    | 3280  | No  | NA   | 0  | 0              | Not-determined  | Genome-fragment | NA              | 0     | 0     |
| 516_vs_67735              | [full]    | 10597 | No  | NA   | 1  | 0              | Low-quality     | Genome-fragment | NA              | 6.75  | 0     |
| 58_vs_k141_68066          | [full]    | 5113  | No  | NA   | 0  | 0              | Not-determined  | Genome-fragment | NA              | 0     | 0     |
| 58_vs_k141_78226          | [full]    | 1587  | No  | NA   | 0  | 2              | Not-determined  | Genome-fragment | NA              | 0     | 0     |
| 58_vs_k141_52186          | [full]    | 1188  | No  | NA   | 0  | 1              | Not-determined  | Genome-fragment | NA              | 0     | 0     |
| 58_vs_k141_199697         | [full]    | 5572  | No  | NA   | 0  | 1              | Not-determined  | Genome-fragment | NA              | 0     | 0     |
| 514_vs_k141_6971          | [full]    | 10606 | No  | NA   | 2  | 0              | Low-quality     | Genome-fragment | NA              | 17.2  | 0     |
| 58_vs_k141_8820           | [full]    | 4942  | No  | NA   | 0  | 0              | Not-determined  | Genome-fragment | NA              | 0     | 0     |
| 513_extracted_31235       |           | 10612 | No  | NA   | 2  | 0              | Low-quality     | Genome-fragment | NA              | 6.68  | 0     |
| 58_vs_k141_112971         | [full]    | 1304  | No  | NA   | 0  | 1              | Not-determined  | Genome-fragment | NA              | 0     | 0     |
| 58_vs_k141_147670         | [full]    | 2940  | No  | NA   | 12 | 0              | Medium-quality  | Genome-fragment | NA              | 62.53 | 0     |
| 514_vs_k141_101062        | [full]    | 10616 | No  | NA   | 6  | 0              | Low-quality     | Genome-fragment | NA              | 25.19 | 0     |
| 54_extracted_31585        |           | 10618 | No  | NA   | 0  | 0              | Low-quality     | Genome-fragment | NA              | 0.96  | 0     |
| 58_vs_k141_103136         | [full]    | 10624 | No  | NA   | 1  | 2              | Low-quality     | Genome-fragment | NA              | 9.3   | 0     |
| 58_vs_k141_17368          | [full]    | 1248  | No  | NA   | 0  | 0              | Not-determined  | Genome-fragment | NA              | 0     | 0     |
| 58_vs_k141_36996          | [full]    | 1391  | No  | NA   | 0  | 1              | Not-determined  | Genome-fragment | NA              | 0     | 0     |
| 58_vs_k141_191094         | [full]    | 4460  | No  | NA   | 0  | 4              | Not-determined  | Genome-fragment | NA              | 0     | 0     |
| 511_extracted_k141_15210  |           | 10629 | No  | NA   | 5  | 0              | Low-quality     | Genome-fragment | NA              | 15.72 | 0     |
| 58_vs_k141_13899          | [full]    | 6511  | No  | NA   | 0  | 5              | Not-determined  | Genome-fragment | NA              | 0     | 0     |
| 58_vs_k141_130283         | [full]    | 6290  | No  | NA   | 0  | 2              | Not-determined  | Genome-fragment | NA              | 0     | 0     |
| 58_vs_k141_121667         | [full]    | 1847  | No  | NA   | 0  | 0              | Not-determined  | Genome-fragment | NA              | 0     | 0     |
| 59_vs_k141_14254          | [full]    | 10632 | No  | NA   | 4  | 0              | Low-quality     | Genome-fragment | NA              | 24.27 | 0     |
| 53_extracted_k141_82845   |           | 10634 | Yes | 8598 | 2  | 0              | Low-quality     | Genome-fragment | NA              | 15.69 | 15.25 |
| 58_vs_k141_19124          | [full]    | 1353  | No  | NA   | 0  | 0              | Not-determined  | Genome-fragment | NA              | 0     | 0     |
| 58_vs_k141_165070         | [full]    | 1845  | No  | NA   | 0  | 2              | Not-determined  | Genome-fragment | NA              | 0     | 0     |
| 58_vs_k141_199725         | [full]    | 3876  | No  | NA   | 3  | Not-determined | Genome-fragment | NA              | 0               | 0     |       |
| 510_vs_36734              | [full]    | 10638 | No  | NA   | 0  | 2              | Low-quality     | Genome-fragment | NA              | 7.27  | 0     |
| 516_vs_48614              | [full]    | 10639 | No  | NA   | 1  | 0              | Low-quality     | Genome-fragment | NA              | 4.45  | 0     |
| 58_vs_k141_6094           | [full]    | 2183  | No  | NA   | 0  | 2              | Not-determined  | Genome-fragment | NA              | 0     | 0     |
| 58_vs_k141_160978         | [full]    | 10643 | No  | NA   | 0  | 0              | Low-quality     | Genome-fragment | NA              | 20.18 | 0     |
| 513_vs_146829             | [full]    | 10645 | No  | NA   | 0  | 1              | Low-quality     | Genome-fragment | NA              | 12.38 | 0     |
| 58_vs_k141_6096           | [full]    | 1778  | No  | NA   | 0  | 0              | Not-determined  | Genome-fragment | NA              | 0     | 0     |
| 514_vs_k141_59243         | [full]    | 10646 | No  | NA   | 2  | 2              | Low-quality     | Genome-fragment | NA              | 17.24 | 0     |
| 517_extracted_k141_105581 |           | 10649 | No  | NA   | 0  | 1              | Low-quality     | Genome-fragment | NA              | 2.66  | 0     |
| 55_vs_k141_128231         | [full]    | 10655 | No  | NA   | 2  | 1              | Low-quality     | Genome-fragment | NA              | 22.02 | 0     |
| 58_vs_k141_17074          | [full]    | 2816  | No  | NA   | 0  | 0              | Not-determined  | Genome-fragment | NA              | 0     | 0     |
| 55_vs_k141_101465         | [full]    | 10662 | No  | NA   | 12 | 0              | Low-quality     | Genome-fragment | NA              | 12.95 | 0     |
| 58_vs_k141_52270          | [full]    | 3338  | No  | NA   | 0  | 0              | Not-determined  | Genome-fragment | NA              | 0     | 0     |
| 58_vs_k141_113044         | [full]    | 2460  | No  | NA   | 0  | 2              | Not-determined  | Genome-fragment | NA              | 0     | 0     |
| 58_vs_k141_69592          | [full]    | 1425  | No  | NA   | 0  | 0              | Not-determined  | Genome-fragment | NA              | 0     | 0     |
| 58_vs_k141_165095         | [full]    | 5228  | No  | NA   | 0  | 3              | Not-determined  | Genome-fragment | NA              | 0     | 0     |
| 58_vs_k141_16259          | [full]    | 3469  | No  | NA   | 0  | 2              | Not-determined  | Genome-fragment | NA              | 0     | 0     |
| 58_vs_k141_13615          | [full]    | 1396  | No  | NA   | 0  | 0              | Not-determined  | Genome-fragment | NA              | 0     | 0     |
| 58_vs_k141_26264          | [full]    | 2959  | No  | NA   | 0  | 3              | Not-determined  | Genome-fragment | NA              | 0     | 0     |
| 58_vs_k141_113059         | [full]    | 3703  | No  | NA   | 4  | 0              | Medium-quality  | Genome-fragment | NA              | 72.98 | 0     |
| 52_vs_k141_21238          | [full]    | 10673 | No  | NA   | 0  | 0              | Low-quality     | Genome-fragment | NA              | 17.87 | 0     |
| 58_vs_k141_104282         | [full]    | 1605  | No  | NA   | 0  | 1              | Not-determined  | Genome-fragment | NA              | 0     | 0     |
| 512_vs_k141_40810         | [full]    | 10678 | No  | NA   | 1  | 2              | Low-quality     | Genome-fragment | NA              | 9.56  | 0     |
| 58_vs_k141_147689         | [full]    | 5160  | No  | NA   | 0  | 0              | Not-determined  | Genome-fragment | NA              | 0     | 0     |
| 58_vs_k141_8970           | [full]    | 1456  | No  | NA   | 0  | 0              | Not-determined  | Genome-fragment | NA              | 0     | 0     |
| 58_vs_k141_52319          | [full]    | 2357  | No  | NA   | 0  | 1              | Not-determined  | Genome-fragment | NA              | 0     | 0     |
| 58_vs_k141_18231          | [full]    | 22065 | No  | NA   | 15 | 0              | Medium-quality  | Genome-fragment | NA              | 53.63 | 0     |
| 56_vs_k141_18684          | [full]    | 10679 | No  | NA   | 0  | 1              | Low-quality     | Genome-fragment | NA              | 29.37 | 0     |
| 58_vs_k141_8998           | [full]    | 1427  | No  | NA   | 0  | 0              | Not-determined  | Genome-fragment | NA              | 0     | 0     |
| 52_vs_k141_174            | [full]    | 10682 | No  | NA   | 4  | 2              | Low-quality     | Genome-fragment | NA              | 17.74 | 0     |
| 58_vs_k141_156477         | [full]    | 1803  | No  | NA   | 2  | 2              | Not-determined  | Genome-fragment | NA              | 0     | 0     |
| 53_vs_k141_795            | [full]    | 10687 | No  | NA   | 4  | 1              | Low-quality     | Genome-fragment | NA              | 13.87 | 0     |
| 58_vs_k141_112399         | [full]    | 10689 | No  | NA   | 3  | 0              | Low-quality     | Genome-fragment | NA              | 27.28 | 0     |
| 58_vs_k141_156449         | [full]    | 1990  | No  | NA   | 0  | 2              | Not-determined  | Genome-fragment | NA              | 0     | 0     |
| 58_vs_k141_52334          | [full]    | 1998  | No  | NA   | 0  | 1              | Not-determined  | Genome-fragment | NA              | 0     | 0     |
| 57_extracted_95619        |           | 10717 | No  | NA   | 3  | 1              | Low-quality     | Genome-fragment | NA              | 22.04 | 0     |
| 514_vs_k141_16610         | [full]    | 10732 | No  | NA   | 1  | 6              | Low-quality     | Genome-fragment | NA              | 4.97  | 0     |
| 59_vs_k141_56161          | [full]    | 10733 | No  | NA   | 3  | 0              | Low-quality     | Genome-fragment | NA              | 32.12 | 0     |
| 59_extracted_k141_63973   |           | 10734 | No  | NA   | 6  | 0              | Low-quality     | Genome-fragment | NA              | 27.23 | 0     |
| 58_vs_k141_5031           | [full]    | 6504  | No  | NA   | 0  | 3              | Not-determined  | Genome-fragment | NA              | 0     | 0     |
| 58_vs_k141_182386         | [full]    | 1930  | No  | NA   | 0  | 2              | Not-determined  | Genome-fragment | NA              | 0     | 0     |
| 516_extracted_44547       |           | 10743 | No  | NA   | 0  | 3              | Low-quality     | Genome-fragment | NA              | 3.74  | 0     |
| 59_vs_k141_17785          | [full]    | 10746 | No  | NA   | 1  | 1              | Low-quality     | Genome-fragment | NA              | 23.95 | 0     |
| 516_vs_8272               | [full]    | 10758 | No  | NA   | 1  | 2              | Low-quality     | Genome-fragment | NA              | 16.65 | 0     |
| 58_vs_k141_199828         | [full]    | 4289  | No  | NA   | 0  | 3              | Not-determined  | Genome-fragment | NA              | 0     | 0     |
| 54_extracted_k141_66652   |           | 10758 | Yes | 2104 | 1  | 2              | Low-quality     | Genome-fragment | NA              | 2.68  | 80.44 |
| 57_extracted_8400         |           | 10768 | No  | NA   | 5  | 0              | Low-quality     | Genome-fragment | NA              | 22.68 | 0     |
| 57_extracted_83165        |           | 10776 | No  | NA   | 6  | 0              | Low-quality     | Genome-fragment | NA              | 5.34  | 0     |
| 58_vs_k141_17549          | [full]    | 2788  | No  | NA   | 0  | 4              | Not-determined  | Genome-fragment | NA              | 0     | 0     |
| 58_vs_k141_14366          | [full]    | 4512  | No  | NA   | 0  | 4              | Not-determined  | Genome-fragment | NA              | 0     | 0     |
| 58_vs_k141_147697         | [full]    | 5532  | No  | NA   | 0  | 2              | Medium-quality  | Genome-fragment | NA              | 62.99 | 0     |
| 58_vs_k141_130541         | [full]    | 1150  | No  | NA   | 0  | 1              | Not-determined  | Genome-fragment | NA              | 0     | 0     |
| 55_vs_k141_105800         | [full]    | 10791 | No  | NA   | 4  | 0              | Low-quality     | Genome-fragment | NA              | 20.44 | 0     |
| 58_vs_k141_78469          | [full]    | 1408  | No  | NA   | 0  | 0              | Not-determined  | Genome-fragment | NA              | 0     | 0     |
| 58_vs_k141_26370          | [full]    | 4003  | No  | NA   | 0  | 2              | Not-determined  | Genome-fragment | NA              | 0     | 0     |
| 512_vs_k141_71385         | [full]    | 10792 | No  | NA   | 0  | 9              | Low-quality     | Genome-fragment | NA              | 4.13  | 0     |
| 58_vs_k141_139195         | [full]    | 6838  | No  | NA   | 0  | 2              | Not-determined  | Genome-fragment | NA              | 0     | 0     |
| 58_vs_k141_95685          | [full]    | 2774  | No  | NA   | 0  | 1              | Not-determined  | Genome-fragment | NA              | 0     | 0     |
| 58_vs_k141_121864         | [full]    | 2279  | No  | NA   | 0  | 0              | Not-determined  | Genome-fragment | NA              | 0     | 0     |
| 58_vs_k141_16046          | [full]    | 2616  | No  | NA   | 0  | 1              | Not-determined  | Genome-fragment | NA              | 0     | 0     |
| 58_vs_k141_104441         | [full]    | 2663  | No  | NA   | 0  | 0              | Not-determined  | Genome-fragment | NA              | 0     | 0     |
| 514_vs_k141_75166         | [full]    | 10805 | No  | NA   | 0  | 0              | Low-quality     | Genome-fragment | NA              | 24.57 | 0     |
| 58_vs_k141_13139          | [full]    | 1188  | No  | NA   | 0  | 1              | Not-determined  | Genome-fragment | NA              | 0     | 0     |
| 58_vs_k141_1321           | [full]    | 8419  | No  | NA   | 0  | 2              | Not-determined  | Genome-fragment | NA              | 0     | 0     |
| 58_vs_k141_56772          | [full]    | 10809 | No  | NA   | 13 | 0              | Low-quality     | Genome-fragment | NA              | 17.98 | 0     |
| 58_vs_k141_87297          | [full]    | 1418  | No  | NA   | 0  | 1              | Not-determined  | Genome-fragment | NA              | 0     | 0     |
| 513_vs_56845              | [full]    | 10815 | No  | NA   | 0  | 5              | Low-quality     | Genome-fragment | NA              | 25.25 | 0     |
| 58_extracted_k141_13058   |           | 10818 | No  | NA   | 0  | 5              | Low-quality     | Genome-fragment | NA              | 28.83 | 0     |
| 58_vs_k141_35156          | [full]    | 2210  | No  | NA   | 0  | 2              | Not-determined  | Genome-fragment | NA              | 0     | 0     |
| 516_vs_14307              | [partial] | 10820 | No  | NA   | 1  | 1              | Low-quality     | Genome-fragment | NA              | 26.41 | 0     |
| 516_extracted_167270      |           | 10823 | No  | NA   | 0  | 1              | Low-quality     | Genome-fragment | NA              | 0     | 0     |
| 58_vs_k141_163459         | [full]    | 10823 | No  | NA   | 2  | 0              | Low-quality     | Genome-fragment | NA              | 13.19 | 0     |
| 57_extracted_135907       |           | 10828 | No  | NA   | 1  | 0              | Low-quality     | Genome-fragment | NA              | 23.95 | 0     |
| 512_extracted_k141_125693 |           | 10838 | No  | NA   | 0  | 4              | Low-quality     | Genome-fragment | NA              | 16.4  | 0     |
| 53_vs_k141_7878           | [full]    | 10843 | No  | NA   | 5  | 0              | Low-quality     | Genome-fragment | NA              | 18.05 | 0     |
| 58_vs_k141_104511         | [full]    | 2821  | No  | NA   | 0  | 1              | Not-determined  |                 |                 |       |       |



|                          |             |       |     |      |    |    |                |                 |    |       |       |
|--------------------------|-------------|-------|-----|------|----|----|----------------|-----------------|----|-------|-------|
| 58_vs_k141_87460         | [full]      | 2883  | No  | NA   | 0  | 0  | Not-determined | Genome-fragment | NA | 0     | 0     |
| 58_vs_k141_165513        | [full]      | 2050  | No  | NA   | 0  | 1  | Not-determined | Genome-fragment | NA | 0     | 0     |
| 513_vs_k0808             | [full]      | 10949 | No  | NA   | 1  | 0  | Low-quality    | Genome-fragment | NA | 27.94 | 0     |
| 58_vs_k141_17739         | [full]      | 1395  | No  | NA   | 0  | 1  | Not-determined | Genome-fragment | NA | 0     | 0     |
| 58_vs_k141_175167        | [0_partial] | 10950 | No  | NA   | 0  | 7  | Low-quality    | Genome-fragment | NA | 10.01 | 0     |
| 58_vs_k141_5541          | [full]      | 2288  | No  | NA   | 0  | 0  | Not-determined | Genome-fragment | NA | 0     | 0     |
| 55_vs_k141_71228         | [full]      | 10959 | No  | NA   | 12 | 0  | Low-quality    | Genome-fragment | NA | 29.3  | 0     |
| 58_vs_k141_147994        | [full]      | 2542  | No  | NA   | 0  | 2  | Not-determined | Genome-fragment | NA | 0     | 0     |
| 58_vs_k141_139351        | [full]      | 26317 | No  | NA   | 0  | 0  | Medium-quality | Genome-fragment | NA | 64.31 | 0     |
| 58_vs_k141_122122        | [full]      | 2280  | No  | NA   | 0  | 1  | Not-determined | Genome-fragment | NA | 0     | 0     |
| 58_vs_k141_191609        | [full]      | 1005  | No  | NA   | 0  | 1  | Not-determined | Genome-fragment | NA | 0     | 0     |
| 515_extracted_20336      | [full]      | 20962 | No  | NA   | 0  | 4  | Low-quality    | Genome-fragment | NA | 10.97 | 0     |
| 58_vs_k141_11313         | [full]      | 2740  | No  | NA   | 0  | 1  | Not-determined | Genome-fragment | NA | 0     | 0     |
| 58_vs_k141_35325         | [full]      | 3003  | No  | NA   | 0  | 2  | Not-determined | Genome-fragment | NA | 0     | 0     |
| 516_vs_k4018             | [full]      | 10965 | No  | NA   | 3  | 0  | Low-quality    | Genome-fragment | NA | 5.92  | 0     |
| 58_vs_k141_121411        | [full]      | 3689  | No  | NA   | 0  | 2  | Not-determined | Genome-fragment | NA | 0     | 0     |
| 58_vs_k141_43870         | [full]      | 1389  | No  | NA   | 0  | 1  | Not-determined | Genome-fragment | NA | 0     | 0     |
| 58_vs_k141_139418        | [full]      | 2102  | No  | NA   | 0  | 2  | Not-determined | Genome-fragment | NA | 0     | 0     |
| 58_vs_k141_174042        | [full]      | 5494  | No  | NA   | 0  | 2  | Not-determined | Genome-fragment | NA | 0     | 0     |
| 58_vs_k141_78664         | [0_partial] | 10968 | No  | NA   | 2  | 2  | Low-quality    | Genome-fragment | NA | 13.52 | 0     |
| 58_vs_k141_139433        | [full]      | 2014  | No  | NA   | 0  | 1  | Not-determined | Genome-fragment | NA | 0     | 0     |
| 58_vs_k141_122152        | [full]      | 1127  | No  | NA   | 0  | 2  | Not-determined | Genome-fragment | NA | 0     | 0     |
| 513_extracted_148235     | [full]      | 10970 | No  | NA   | 12 | 0  | Low-quality    | Genome-fragment | NA | 17.67 | 0     |
| 53_extracted_k141_45216  | [full]      | 10971 | No  | NA   | 0  | 8  | Low-quality    | Genome-fragment | NA | 3.07  | 0     |
| 58_vs_k141_148070        | [full]      | 2764  | No  | NA   | 0  | 1  | Not-determined | Genome-fragment | NA | 0     | 0     |
| 58_vs_k141_169202        | [full]      | 10971 | No  | NA   | 3  | 2  | Low-quality    | Genome-fragment | NA | 31.29 | 0     |
| 58_vs_k141_61411         | [full]      | 2208  | No  | NA   | 0  | 0  | Not-determined | Genome-fragment | NA | 0     | 0     |
| 57_vs_120623             | [0_partial] | 10980 | No  | NA   | 1  | 6  | Low-quality    | Genome-fragment | NA | 15.43 | 0     |
| 58_vs_k141_43909         | [full]      | 1793  | No  | NA   | 2  | 2  | Not-determined | Genome-fragment | NA | 0     | 0     |
| 55_vs_k141_62502         | [full]      | 10986 | No  | NA   | 3  | 0  | Low-quality    | Genome-fragment | NA | 28.01 | 0     |
| 58_vs_k141_133228        | [full]      | 10996 | No  | NA   | 1  | 3  | Low-quality    | Genome-fragment | NA | 6.5   | 0     |
| 58_vs_k141_165630        | [full]      | 1189  | No  | NA   | 1  | 1  | Not-determined | Genome-fragment | NA | 0     | 0     |
| 511_vs_k141_46825        | [full]      | 11001 | No  | NA   | 0  | 5  | Low-quality    | Genome-fragment | NA | 27.13 | 0     |
| 58_vs_k141_7451          | [full]      | 2318  | No  | NA   | 0  | 2  | Not-determined | Genome-fragment | NA | 0     | 0     |
| 58_vs_k141_104737        | [full]      | 1216  | No  | NA   | 0  | 1  | Not-determined | Genome-fragment | NA | 0     | 0     |
| 58_vs_k141_15784         | [full]      | 1478  | No  | NA   | 0  | 1  | Not-determined | Genome-fragment | NA | 0     | 0     |
| 58_vs_k141_139497        | [full]      | 11407 | No  | NA   | 0  | 9  | Not-determined | Genome-fragment | NA | 0     | 0     |
| 58_vs_k141_7874          | [full]      | 1054  | No  | NA   | 0  | 1  | Not-determined | Genome-fragment | NA | 0     | 0     |
| 55_extracted_k141_74316  | [full]      | 11001 | No  | NA   | 11 | 0  | Low-quality    | Genome-fragment | NA | 24.11 | 0     |
| 510_vs_17005             | [full]      | 11001 | No  | NA   | 2  | 1  | Low-quality    | Genome-fragment | NA | 22.55 | 0     |
| 514_vs_k141_30159        | [full]      | 11002 | No  | NA   | 0  | 1  | Low-quality    | Genome-fragment | NA | 11.51 | 0     |
| 58_vs_k141_37627         | [full]      | 2399  | No  | NA   | 0  | 1  | Not-determined | Genome-fragment | NA | 0     | 0     |
| 58_vs_k141_139541        | [full]      | 2621  | No  | NA   | 0  | 0  | Not-determined | Genome-fragment | NA | 0     | 0     |
| 514_vs_k141_117149       | [full]      | 11005 | No  | NA   | 1  | 0  | Low-quality    | Genome-fragment | NA | 14.32 | 0     |
| 517_vs_k141_59730        | [full]      | 11008 | No  | NA   | 2  | 0  | Low-quality    | Genome-fragment | NA | 24.47 | 0     |
| 59_vs_k141_50875         | [full]      | 11011 | No  | NA   | 0  | 0  | Low-quality    | Genome-fragment | NA | 17.25 | 0     |
| 58_vs_k141_139557        | [full]      | 2236  | No  | NA   | 0  | 2  | Not-determined | Genome-fragment | NA | 0     | 0     |
| 58_vs_k141_156783        | [full]      | 2068  | No  | NA   | 0  | 0  | Not-determined | Genome-fragment | NA | 0     | 0     |
| 58_vs_k141_104800        | [full]      | 5153  | No  | NA   | 0  | 4  | Not-determined | Genome-fragment | NA | 0     | 0     |
| 58_vs_k141_824           | [full]      | 3165  | No  | NA   | 0  | 1  | Not-determined | Genome-fragment | NA | 0     | 0     |
| 58_vs_k141_78846         | [full]      | 2287  | No  | NA   | 0  | 3  | Not-determined | Genome-fragment | NA | 0     | 0     |
| 512_vs_k141_159923       | [full]      | 11012 | No  | NA   | 0  | 0  | Low-quality    | Genome-fragment | NA | 19.65 | 0     |
| 58_vs_k141_139579        | [full]      | 2097  | No  | NA   | 0  | 2  | Not-determined | Genome-fragment | NA | 0     | 0     |
| 512_vs_k141_27884        | [full]      | 11016 | No  | NA   | 1  | 0  | Low-quality    | Genome-fragment | NA | 11.49 | 0     |
| 58_vs_k141_5423          | [full]      | 1786  | No  | NA   | 1  | 1  | Not-determined | Genome-fragment | NA | 0     | 0     |
| 58_vs_k141_70035         | [full]      | 2644  | No  | NA   | 0  | 0  | Not-determined | Genome-fragment | NA | 0     | 0     |
| 55_vs_k141_112902        | [full]      | 11029 | No  | NA   | 8  | 0  | Low-quality    | Genome-fragment | NA | 24.6  | 0     |
| 58_vs_k141_853           | [full]      | 1378  | No  | NA   | 0  | 1  | Not-determined | Genome-fragment | NA | 0     | 0     |
| 55_vs_k141_62431         | [full]      | 11033 | No  | NA   | 2  | 2  | Low-quality    | Genome-fragment | NA | 18.24 | 0     |
| 51_extracted_k141_46477  | [full]      | 11041 | No  | NA   | 3  | 0  | Low-quality    | Genome-fragment | NA | 24.33 | 0     |
| 58_vs_k141_78870         | [full]      | 1917  | No  | NA   | 0  | 2  | Not-determined | Genome-fragment | NA | 12.43 | 0     |
| 55_vs_k141_114802        | [full]      | 11070 | No  | NA   | 0  | 1  | Low-quality    | Genome-fragment | NA | 0     | 0     |
| 58_vs_k141_131000        | [full]      | 4957  | No  | NA   | 0  | 1  | Not-determined | Genome-fragment | NA | 0     | 0     |
| 53_vs_k141_6985          | [0_partial] | 11075 | No  | NA   | 1  | 7  | Low-quality    | Genome-fragment | NA | 1.97  | 0     |
| 58_vs_k141_167918        | [full]      | 1692  | No  | NA   | 0  | 1  | Not-determined | Genome-fragment | NA | 0     | 0     |
| 58_vs_k141_122296        | [full]      | 1435  | No  | NA   | 0  | 0  | Not-determined | Genome-fragment | NA | 0     | 0     |
| 511_extracted_k141_8405  | [full]      | 11078 | No  | NA   | 0  | 0  | Low-quality    | Genome-fragment | NA | 6.78  | 0     |
| 516_vs_7059              | [full]      | 11079 | No  | NA   | 3  | 0  | Low-quality    | Genome-fragment | NA | 24.57 | 0     |
| 51_extracted_k141_117795 | [full]      | 11082 | Yes | 6085 | 1  | 0  | Low-quality    | Genome-fragment | NA | 10.41 | 45.09 |
| 57_vs_61546              | [full]      | 11107 | No  | NA   | 1  | 0  | Low-quality    | Genome-fragment | NA | 23.58 | 0     |
| 58_vs_k141_5469          | [full]      | 1191  | No  | NA   | 0  | 1  | Not-determined | Genome-fragment | NA | 0     | 0     |
| 516_extracted_6869       | [full]      | 11113 | No  | NA   | 0  | 0  | Low-quality    | Genome-fragment | NA | 14.11 | 0     |
| 516_vs_28256             | [full]      | 11122 | No  | NA   | 13 | 0  | Low-quality    | Genome-fragment | NA | 25.59 | 0     |
| 58_vs_k141_8931          | [full]      | 2248  | No  | NA   | 0  | 2  | Not-determined | Genome-fragment | NA | 0     | 0     |
| 58_extracted_k141_6026   | [full]      | 11126 | No  | NA   | 11 | 0  | Low-quality    | Genome-fragment | NA | 16.46 | 0     |
| 58_vs_k141_3460          | [full]      | 6240  | No  | NA   | 0  | 1  | Not-determined | Genome-fragment | NA | 0     | 0     |
| 58_vs_k141_63567         | [full]      | 11142 | No  | NA   | 2  | 0  | Low-quality    | Genome-fragment | NA | 13.59 | 0     |
| 58_vs_k141_44122         | [full]      | 1149  | No  | NA   | 0  | 0  | Not-determined | Genome-fragment | NA | 0     | 0     |
| 58_vs_k141_79568         | [full]      | 11152 | No  | NA   | 3  | 0  | Low-quality    | Genome-fragment | NA | 18.93 | 0     |
| 516_extracted_7504       | [full]      | 11158 | No  | NA   | 0  | 5  | Low-quality    | Genome-fragment | NA | 7.23  | 0     |
| 58_vs_k141_5458          | [full]      | 8672  | No  | NA   | 0  | 1  | Not-determined | Genome-fragment | NA | 0     | 0     |
| 512_vs_k141_43013        | [full]      | 11158 | No  | NA   | 0  | 0  | Low-quality    | Genome-fragment | NA | 21.67 | 0     |
| 58_vs_k141_148209        | [full]      | 3212  | No  | NA   | 0  | 2  | Not-determined | Genome-fragment | NA | 0     | 0     |
| 58_vs_k141_156843        | [full]      | 2876  | No  | NA   | 0  | 0  | Not-determined | Genome-fragment | NA | 0     | 0     |
| 58_vs_k141_113473        | [full]      | 2704  | No  | NA   | 0  | 2  | Not-determined | Genome-fragment | NA | 0     | 0     |
| 58_vs_k141_61568         | [full]      | 4386  | No  | NA   | 0  | 1  | Not-determined | Genome-fragment | NA | 0     | 0     |
| 58_vs_k141_5496          | [full]      | 6447  | No  | NA   | 0  | 3  | Not-determined | Genome-fragment | NA | 0     | 0     |
| 58_vs_k141_35522         | [full]      | 2144  | No  | NA   | 0  | 1  | Not-determined | Genome-fragment | NA | 0     | 0     |
| 58_vs_k141_18013         | [full]      | 3810  | No  | NA   | 0  | 1  | Not-determined | Genome-fragment | NA | 0     | 0     |
| 514_vs_k141_71087        | [full]      | 11166 | No  | NA   | 2  | 0  | Low-quality    | Genome-fragment | NA | 28.76 | 0     |
| 51_extracted_k141_85219  | [full]      | 11189 | No  | NA   | 4  | 0  | Low-quality    | Genome-fragment | NA | 24.25 | 0     |
| 58_vs_k141_35355         | [full]      | 2206  | No  | NA   | 0  | 0  | Not-determined | Genome-fragment | NA | 0     | 0     |
| 58_vs_k141_44206         | [full]      | 3297  | No  | NA   | 0  | 2  | Not-determined | Genome-fragment | NA | 0     | 0     |
| 58_vs_k141_131037        | [full]      | 1032  | No  | NA   | 0  | 2  | Not-determined | Genome-fragment | NA | 0     | 0     |
| 512_vs_k141_40246        | [full]      | 11213 | No  | NA   | 0  | 0  | Low-quality    | Genome-fragment | NA | 26.95 | 0     |
| 53_vs_k141_65147         | [full]      | 11219 | Yes | 6433 | 3  | 2  | Low-quality    | Genome-fragment | NA | 11.47 | 42.66 |
| 58_vs_k141_122420        | [full]      | 1042  | No  | NA   | 0  | 1  | Not-determined | Genome-fragment | NA | 0     | 0     |
| 55_vs_k141_138803        | [full]      | 11219 | No  | NA   | 12 | 0  | Low-quality    | Genome-fragment | NA | 24.94 | 0     |
| 517_vs_k141_135182       | [full]      | 11220 | No  | NA   | 0  | 1  | Not-determined | Genome-fragment | NA | 6.67  | 0     |
| 58_vs_k141_156903        | [full]      | 7663  | No  | NA   | 0  | 2  | Not-determined | Genome-fragment | NA | 0     | 0     |
| 58_vs_k141_16904         | [full]      | 1082  | No  | NA   | 0  | 0  | Not-determined | Genome-fragment | NA | 0     | 0     |
| 516_vs_53051             | [full]      | 11224 | No  | NA   | 0  | 0  | Low-quality    | Genome-fragment | NA | 14.87 | 0     |
| 58_vs_k141_87771         | [full]      | 3052  | No  | NA   | 0  | 2  | Not-determined | Genome-fragment | NA | 0     | 0     |
| 54_extracted_14654       | [full]      | 11235 | No  | NA   | 5  | 0  | Low-quality    | Genome-fragment | NA | 10.28 | 0     |
| 517_vs_k141_3020         | [full]      | 11236 | No  | NA   | 0  | 0  | Low-quality    | Genome-fragment | NA | 16.9  | 0     |
| 58_vs_k141_44236         | [full]      | 4007  | No  | NA   | 0  | 3  | Not-determined | Genome-fragment | NA | 0     | 0     |
| 57_extracted_17856       | [full]      | 11234 | No  | NA   | 4  | 1  | Low-quality    | Genome-fragment | NA | 22.43 | 0     |
| 53_vs_k141_34404         | [full]      | 11268 | No  | NA   | 4  | 3  | Low-quality    | Genome-fragment | NA | 26.31 | 0     |
| 58_vs_k141_52880         | [full]      | 6048  | No  | NA   | 0  | 3  | Not-determined | Genome-fragment | NA | 0     | 0     |
| 58_vs_k141_44246         | [full]      | 5793  | No  | NA   | 0  | 5  | Not-determined | Genome-fragment | NA | 0     | 0     |
| 517_vs_k141_152433       | [full]      | 11272 | No  | NA   | 10 | 0  | Low-quality    | Genome-fragment | NA | 30.21 | 0     |
| 55_vs_k141_17272         | [full]      | 11276 | No  | NA   | 3  | 0  | Not-determined | Genome-fragment | NA | 12.84 | 0     |
| 58_vs_k141_52985         | [full]      | 7434  | No  | NA   | 0  | 5  | Not-determined | Genome-fragment | NA | 0     | 0     |
| 58_vs_k141_44261         | [full]      | 2911  | No  | NA   | 0  | 2  | Not-determined | Genome-fragment | NA | 0     | 0     |
| 57_extracted_7712        | [full]      | 11276 | No  | NA   | 3  | 0  | Low-quality    | Genome-fragment | NA | 7.35  | 0     |
| 51_vs_k141_153593        | [full]      | 11277 | No  | NA   | 9  | 0  | Low-quality    | Genome-fragment | NA | 29.76 | 0     |
| 58_vs_k141_35657         | [full]      | 1817  | No  | NA   | 0  | 1  | Not-determined | Genome-fragment | NA | 0     | 0     |
| 57_extracted_134929      | [full]      | 11277 | Yes | 3032 | 1  | 1  | Low-quality    | Genome-fragment | NA | 1.22  | 73.11 |
| 58_vs_k141_44267         | [full]      | 9015  | No  | NA   | 0  | 2  | Not-determined | Genome-fragment | NA | 0     | 0     |
| 58_vs_k141_200213        | [full]      | 4242  | No  | NA   | 0  | 5  | Not-determined | Genome-fragment | NA | 0     | 0     |
| 58_vs_k141_131710        | [full]      | 11279 | No  | NA   | 4  | 1  | Low-quality    | Genome-fragment | NA | 15.39 | 0     |
| 51_extracted_k141_17249  | [full]      | 11282 | No  | NA   | 0  | 0  | Low-quality    | Genome-fragment | NA | 15.58 | 0     |
| 516_vs_144307            | [full]      | 11291 | No  | NA   | 0  | 0  | Low-quality    | Genome-fragment | NA | 27.91 | 0     |
| 514_vs_k141_18095        | [full]      | 33715 | No  | NA   | 0  | 18 | Not-determined | Genome-fragment | NA | 0     | 0     |
| 514_vs_k141_27055        | [full]      | 11293 | No  | NA   | 0  | 0  | Low-quality    | Genome-fragment | NA | 15.56 | 0     |
| 58_vs_k141_35688         | [full]      | 2281  | No  | NA   | 0  | 3  | Not-determined | Genome-fragment | NA | 0     | 0     |
| 58_vs_k141_139828        | [full]      | 1215  | No  | NA   | 0  | 0  | Not-determined | Genome-fragment | NA | 0     | 0     |
| 58_vs_k141_165839        | [full]      | 1789  |     |      |    |    |                |                 |    |       |       |



|                           |       |     |       |    |   |                |                   |       |       |
|---------------------------|-------|-----|-------|----|---|----------------|-------------------|-------|-------|
| 512_extracted_k141_8749   | 11450 | Yes | 8941  | 1  | 1 | Low-quality    | Genome-fragment   | 10.71 | 21.91 |
| 516_extracted_46094       | 11454 | No  |       | 3  | 1 | Low-quality    | Genome-fragment   | 30.25 | 0     |
| 58_vs_k141_35975[1]       | 4151  | No  |       | 0  | 0 | Not-determined | Genome-fragment   | NA    | 0     |
| 58_vs_k141_166011[1]      | 2455  | No  |       | 0  | 2 | Not-determined | Genome-fragment   | NA    | 0     |
| 58_vs_k141_44380[1]       | 1749  | No  |       | 0  | 3 | Not-determined | Genome-fragment   | NA    | 0     |
| 55_vs_k141_57728[1]       | 11461 | No  |       | 0  | 0 | Low-quality    | Genome-fragment   | 18.54 | 0     |
| 58_vs_k141_105210[1]      | 1227  | No  |       | 0  | 0 | Not-determined | Genome-fragment   | NA    | 0     |
| 516_vs_26037[1]           | 11467 | No  |       | 4  | 0 | Low-quality    | Genome-fragment   | 27.54 | 0     |
| 58_vs_k141_148647[1]      | 1972  | No  |       | 0  | 3 | Not-determined | Genome-fragment   | NA    | 0     |
| 58_vs_k141_27303[1]       | 4622  | No  |       | 0  | 4 | Not-determined | Genome-fragment   | NA    | 0     |
| 516_vs_28240[1]           | 11471 | No  |       | 0  | 1 | Low-quality    | Genome-fragment   | 26.13 | 0     |
| 58_vs_k141_105236[1]      | 2008  | No  |       | 0  | 1 | Not-determined | Genome-fragment   | NA    | 0     |
| 58_vs_k141_27313[1]       | 1982  | No  |       | 0  | 1 | Not-determined | Genome-fragment   | NA    | 0     |
| 58_vs_k141_148658[1]      | 3582  | No  |       | 0  | 2 | Not-determined | Genome-fragment   | NA    | 0     |
| 58_vs_k141_79415[1]       | 2342  | No  |       | 0  | 0 | Not-determined | Genome-fragment   | NA    | 0     |
| 516_vs_77473[1]           | 11459 | No  |       | 0  | 0 | Low-quality    | Genome-fragment   | 6.4   | 0     |
| 58_vs_k141_105269[1]      | 6706  | No  |       | 0  | 4 | Not-determined | Genome-fragment   | NA    | 0     |
| 58_vs_k141_166057[1]      | 2049  | No  |       | 0  | 1 | Not-determined | Genome-fragment   | NA    | 0     |
| 58_vs_k141_192241[1]      | 2124  | No  |       | 0  | 3 | Not-determined | Genome-fragment   | NA    | 0     |
| 53_vs_k141_86775[1]       | 11501 | No  |       | 3  | 0 | Low-quality    | Genome-fragment   | 15.61 | 0     |
| 516_extracted_73955       | 11511 | No  |       | 5  | 1 | Low-quality    | Genome-fragment   | 19.71 | 0     |
| 55_vs_k141_35298[1]       | 21517 | No  |       | 4  | 3 | Low-quality    | Genome-fragment   | 27.56 | 0     |
| 58_vs_k141_79466[1]       | 2147  | No  |       | 0  | 1 | Not-determined | Genome-fragment   | NA    | 0     |
| 53_vs_k141_116740[1]      | 11525 | No  |       | 1  | 1 | Low-quality    | Genome-fragment   | 5.62  | 0     |
| 58_extracted_k141_201948  | 11549 | No  |       | 0  | 7 | Low-quality    | Genome-fragment   | 2     | 0     |
| 58_vs_k141_174530[1]      | 1872  | No  |       | 0  | 0 | Not-determined | Genome-fragment   | NA    | 0     |
| 57_vs_68451[1]            | 11554 | No  |       | 3  | 1 | Low-quality    | Genome-fragment   | 33.98 | 0     |
| 58_vs_k141_174536[1]      | 2833  | No  |       | 0  | 3 | Not-determined | Genome-fragment   | NA    | 0     |
| 510_vs_89729[1]           | 11573 | No  |       | 1  | 0 | Low-quality    | Genome-fragment   | 7.1   | 0     |
| 55_extracted_k141_54598   | 11574 | No  |       | 7  | 1 | Low-quality    | Genome-fragment   | 20.17 | 0     |
| 512_extracted_k141_143865 | 11582 | No  |       | 2  | 1 | Low-quality    | Genome-fragment   | 10.28 | 0     |
| 58_vs_k141_44412[1]       | 1489  | No  |       | 0  | 1 | Not-determined | Genome-fragment   | NA    | 0     |
| 511_extracted_k141_96649  | 11583 | No  |       | 0  | 0 | Low-quality    | Genome-fragment   | 7.11  | 0     |
| 58_vs_k141_88124[1]       | 6581  | No  |       | 0  | 0 | Not-determined | Genome-fragment   | NA    | 0     |
| 58_vs_k141_200208[1]      | 5702  | No  |       | 0  | 0 | Not-determined | Genome-fragment   | NA    | 0     |
| 516_vs_119370[1]          | 11596 | No  |       | 0  | 0 | Low-quality    | Genome-fragment   | 29.62 | 0     |
| 58_vs_k141_96713[1]       | 1131  | No  |       | 0  | 1 | Not-determined | Genome-fragment   | NA    | 0     |
| 55_vs_k141_130158[1]      | 11604 | No  |       | 16 | 0 | Low-quality    | Genome-fragment   | 33.52 | 0     |
| 53_extracted_k141_111315  | 11608 | No  |       | 4  | 0 | Low-quality    | Genome-fragment   | 25.39 | 0     |
| 58_vs_k141_131482[1]      | 12701 | No  |       | 0  | 9 | Not-determined | Genome-fragment   | NA    | 0     |
| 58_vs_k141_122848[1]      | 3022  | No  |       | 0  | 2 | Not-determined | Genome-fragment   | NA    | 0     |
| 58_vs_k141_148768[1]      | 2954  | No  |       | 0  | 3 | Not-determined | Genome-fragment   | NA    | 0     |
| 511_vs_k141_45044[1]      | 11615 | No  |       | 7  | 0 | Low-quality    | Genome-fragment   | 25.72 | 0     |
| 58_vs_k141_174591[1]      | 2006  | No  |       | 0  | 1 | Not-determined | Genome-fragment   | NA    | 0     |
| 516_vs_771302[1]          | 11615 | No  |       | 1  | 7 | Low-quality    | Genome-fragment   | 20.08 | 0     |
| 51_extracted_k141_54653   | 11617 | No  |       | 0  | 1 | Low-quality    | Genome-fragment   | 30.24 | 0     |
| 58_vs_k141_174595[1]      | 2562  | No  |       | 0  | 1 | Not-determined | Genome-fragment   | NA    | 0     |
| 58_vs_k141_62067[1]       | 2031  | No  |       | 0  | 0 | Not-determined | Genome-fragment   | NA    | 0     |
| 58_vs_k141_96755[1]       | 2111  | No  |       | 0  | 1 | Not-determined | Genome-fragment   | NA    | 0     |
| 512_extracted_k141_120553 | 11618 | No  |       | 5  | 0 | Low-quality    | Genome-fragment   | 38.67 | 0     |
| 58_vs_k141_114003[1]      | 1747  | No  |       | 0  | 0 | Not-determined | Genome-fragment   | NA    | 0     |
| 57_extracted_22952        | 11619 | No  |       | 1  | 6 | Low-quality    | Genome-fragment   | 19.01 | 0     |
| 516_vs_30449[1]           | 11623 | No  |       | 1  | 1 | Low-quality    | Genome-fragment   | 28.14 | 0     |
| 56_vs_k141_43053[1]       | 11631 | Yes | 2316  | 1  | 6 | Low-quality    | Genome-fragment   | 5     | 80.09 |
| 512_vs_k141_131878[1]     | 11663 | Yes | 10877 | 1  | 1 | Low-quality    | Genome-fragment   | 17    | 6.74  |
| 58_vs_k141_192444[1]      | 6901  | No  |       | 0  | 1 | Not-determined | Genome-fragment   | NA    | 0     |
| 58_vs_k141_157378[1]      | 4186  | No  |       | 0  | 2 | Not-determined | Genome-fragment   | NA    | 0     |
| 58_vs_k141_17531[1]       | 2291  | No  |       | 0  | 0 | Not-determined | Genome-fragment   | NA    | 0     |
| 516_vs_62081[1]           | 11667 | No  |       | 0  | 2 | Low-quality    | Genome-fragment   | 36.75 | 0     |
| 58_vs_k141_1434[1]        | 1514  | No  |       | 0  | 0 | Not-determined | Genome-fragment   | NA    | 0     |
| 58_vs_k141_166183[1]      | 1138  | No  |       | 0  | 1 | Not-determined | Genome-fragment   | NA    | 0     |
| 58_vs_k141_140175[1]      | 6459  | No  |       | 0  | 2 | Not-determined | Genome-fragment   | NA    | 0     |
| 58_vs_k141_122904[1]      | 1143  | No  |       | 0  | 1 | Not-determined | Genome-fragment   | NA    | 0     |
| 55_vs_k141_174507[1]      | 11674 | No  |       | 1  | 0 | Low-quality    | Genome-fragment   | 26.93 | 0     |
| 514_extracted_k141_96127  | 11675 | No  |       | 2  | 0 | Low-quality    | Genome-fragment   | 29.55 | 0     |
| 58_vs_k141_1471[1]        | 4928  | No  |       | 0  | 2 | Not-determined | Genome-fragment   | NA    | 0     |
| 58_vs_k141_53482[1]       | 1431  | No  |       | 0  | 1 | Not-determined | Genome-fragment   | NA    | 0     |
| 57_vs_62791[1]            | 11675 | No  |       | 6  | 1 | Low-quality    | Genome-fragment   | 23.11 | 0     |
| 58_vs_k141_140231[1]      | 2446  | No  |       | 1  | 1 | Not-determined | Genome-fragment   | NA    | 0     |
| 514_vs_k141_90303[1]      | 11687 | No  |       | 9  | 1 | Low-quality    | Genome-fragment   | 29.58 | 0     |
| 514_vs_k141_15422[1]      | 11688 | No  |       | 1  | 0 | Low-quality    | Genome-fragment   | 26.95 | 0     |
| 58_vs_k141_44581[1]       | 3145  | No  |       | 1  | 1 | Not-determined | Genome-fragment   | NA    | 0     |
| 58_vs_k141_122933[1]      | 3368  | No  |       | 0  | 3 | Not-determined | Genome-fragment   | NA    | 0     |
| 58_vs_k141_13501[1]       | 1822  | No  |       | 0  | 0 | Not-determined | Genome-fragment   | NA    | 0     |
| 51_vs_k141_76130[1]       | 21692 | No  |       | 0  | 3 | Low-quality    | Genome-fragment   | 3.65  | 0     |
| 58_vs_k141_27602[1]       | 3716  | No  |       | 0  | 1 | Not-determined | Genome-fragment   | NA    | 0     |
| 53_vs_k141_113081[1]      | 11702 | No  |       | 1  | 0 | Low-quality    | Genome-fragment   | 43.05 | 0     |
| 58_vs_k141_9593[1]        | 1697  | No  |       | 0  | 1 | Not-determined | Genome-fragment   | NA    | 0     |
| 55_extracted_k141_53810   | 11719 | No  |       | 13 | 0 | Low-quality    | Genome-fragment   | 29.6  | 0     |
| 58_vs_k141_44813[1]       | 11720 | No  |       | 4  | 0 | Low-quality    | Genome-fragment   | 36.47 | 0     |
| 512_vs_k141_51104[1]      | 11723 | Yes | 2047  | 1  | 5 | Low-quality    | Genome-fragment   | 4.49  | 82.54 |
| 52_vs_k141_79379[1]       | 11730 | No  |       | 0  | 1 | Low-quality    | Genome-fragment   | 31.77 | 0     |
| 514_extracted_k141_103234 | 11731 | No  |       | 5  | 0 | Low-quality    | Genome-fragment   | 30.06 | 0     |
| 58_vs_k141_70599[1]       | 2107  | No  |       | 0  | 0 | Not-determined | Genome-fragment   | NA    | 0     |
| 516_vs_15001[1]           | 11746 | No  |       | 0  | 0 | Low-quality    | Genome-fragment   | 31.57 | 0     |
| 58_vs_k141_27641[1]       | 3727  | No  |       | 0  | 1 | Not-determined | Genome-fragment   | NA    | 0     |
| 58_vs_k141_140296[1]      | 1473  | No  |       | 0  | 0 | Not-determined | Genome-fragment   | NA    | 0     |
| 55_vs_k141_177798[1]      | 11749 | No  |       | 7  | 0 | Low-quality    | Genome-fragment   | 24.91 | 0     |
| 51_vs_k141_17585[1]       | 11753 | No  |       | 0  | 0 | Low-quality    | Genome-fragment   | 27.53 | 0     |
| 511_vs_k141_66678[1]      | 11759 | Yes | 7780  | 2  | 2 | Low-quality    | Genome-fragment   | 12.04 | 33.84 |
| 58_vs_k141_27669[1]       | 1228  | No  |       | 0  | 2 | Not-determined | Genome-fragment   | NA    | 0     |
| 58_vs_k141_105544[1]      | 3129  | No  |       | 0  | 0 | Not-determined | Genome-fragment   | NA    | 0     |
| 58_vs_k141_157543[1]      | 5217  | No  |       | 0  | 0 | Not-determined | Genome-fragment   | NA    | 0     |
| 58_vs_k141_44633[1]       | 1390  | No  |       | 0  | 1 | Not-determined | Genome-fragment   | NA    | 0     |
| 58_vs_k141_114050[1]      | 11762 | Yes | 4667  | 0  | 1 | Low-quality    | Genome-fragment   | 22.37 | 60.32 |
| 58_vs_k141_27683[1]       | 1218  | No  |       | 0  | 1 | Not-determined | Genome-fragment   | NA    | 0     |
| 53_extracted_k141_4403    | 11768 | No  |       | 1  | 0 | Low-quality    | Genome-fragment   | 27.47 | 0     |
| 58_vs_k141_166299[1]      | 3694  | No  |       | 0  | 2 | Not-determined | Genome-fragment   | NA    | 0     |
| 53_vs_k141_42933[1]       | 11781 | No  |       | 0  | 2 | Low-quality    | Genome-fragment   | 5.94  | 0     |
| 55_vs_k141_43334[1]       | 11781 | No  |       | 5  | 0 | Low-quality    | Genome-fragment   | 28.84 | 0     |
| 516_vs_142513[1]          | 11782 | No  |       | 1  | 3 | Low-quality    | Genome-fragment   | 10.31 | 0     |
| 510_vs_60806[1]           | 11782 | No  |       | 0  | 8 | Low-quality    | Genome-fragment   | 10.77 | 0     |
| 55_vs_k141_86243[1]       | 11794 | Yes | 8283  | 2  | 4 | Low-quality    | Genome-fragment   | 5.6   | 29.77 |
| 58_vs_k141_166324[1]      | 5291  | No  |       | 0  | 3 | Not-determined | Genome-fragment   | NA    | 0     |
| 57_vs_30140[1]            | 11799 | No  |       | 0  | 0 | Low-quality    | Genome-fragment   | 41.07 | 0     |
| 510_extracted_76938       | 11805 | No  |       | 8  | 0 | Low-quality    | Genome-fragment   | 35.03 | 0     |
| 58_vs_k141_62199[1]       | 1582  | No  |       | 0  | 0 | Not-determined | Genome-fragment   | NA    | 0     |
| 51_vs_k141_103310[1]      | 11809 | No  |       | 3  | 0 | Low-quality    | Genome-fragment   | 29.11 | 0     |
| 58_vs_k141_79731[1]       | 1558  | No  |       | 0  | 1 | Not-determined | Genome-fragment   | NA    | 0     |
| 58_vs_k141_27736[1]       | 1704  | No  |       | 0  | 0 | Not-determined | Genome-fragment   | NA    | 0     |
| 512_vs_k141_127678[1]     | 11811 | No  |       | 1  | 6 | Low-quality    | Genome-fragment   | 6.35  | 0     |
| 512_vs_k141_744151[1]     | 11820 | No  |       | 0  | 0 | Low-quality    | Genome-fragment   | 29.04 | 0     |
| 514_vs_k141_21408[1]      | 11824 | No  |       | 8  | 0 | Low-quality    | Genome-fragment   | 19.81 | 0     |
| 58_vs_k141_16301[1]       | 2456  | No  |       | 0  | 0 | Not-determined | Genome-fragment   | NA    | 0     |
| 58_vs_k141_18695[1]       | 2510  | No  |       | 0  | 2 | Not-determined | Genome-fragment   | NA    | 0     |
| 58_vs_k141_27753[1]       | 4627  | No  |       | 0  | 5 | Not-determined | Genome-fragment   | NA    | 0     |
| 58_vs_k141_88226[1]       | 1903  | No  |       | 0  | 0 | Not-determined | Genome-fragment   | NA    | 0     |
| 512_extracted_k141_140093 | 11831 | No  |       | 7  | 0 | Low-quality    | Genome-fragment   | 32.22 | 0     |
| 58_vs_k141_120886[1]      | 3272  | No  |       | 0  | 1 | Not-determined | Genome-fragment   | NA    | 0     |
| 55_vs_k141_144003[1]      | 11835 | No  |       | 13 | 0 | Low-quality    | Genome-fragment   | 40.05 | 0     |
| 517_vs_k141_163150[1]     | 11851 | No  |       | 4  | 1 | Low-quality    | Genome-fragment   | 26.96 | 0     |
| 58_vs_k141_62264[1]       | 5661  | No  |       | 0  | 1 | Not-determined | Genome-fragment   | NA    | 0     |
| 58_vs_k141_157571[1]      | 3371  | No  |       | 0  | 0 | Not-determined | Genome-fragment   | NA    | 0     |
| 58_vs_k141_97048[1]       | 2722  | No  |       | 0  | 0 | Not-determined | Genome-fragment   | NA    | 0     |
| 55_vs_k141_17368[1]       | 11854 | Yes | 7001  | 0  | 1 | Low-quality    | Genome-fragment   | 18.07 | 40.94 |
| 58_vs_k141_10068[1]       | 1492  | No  |       | 0  | 0 | Not-determined | Genome-fragment   | NA    | 0     |
| 58_vs_k141_13663[1]       | 1372  | No  |       | 0  | 0 | Not-determined | Genome-fragment   | NA    | 0     |
| 58_vs_k141_183315[1]      | 1622  | No  |       | 0  | 0 | Not-determined | Genome-fragment   | NA    | 0     |
| 58_vs_k141_149336[1]      | 11861 | No  |       | 1  | 2 | Low-quality    | Genome-fragment   | 6.64  | 0     |
| 58_vs_k141_114287[1]      | 2896  | No  |       | 0  | 4 | Not-determined | Genome-fragment   | NA    | 0     |
| 58_extracted_k141_100986  | 11874 | No  |       | 12 | 0 | Low-quality    | Genome-fragment   | 36.01 | 0     |
| 51_vs_k141_119745[1]      | 11875 | No  |       | 1  | 0 | Low-quality    | Genome-fragment   | 28.33 | 0     |
| 512_vs_k141_109862[1]     | 11876 | No  |       | 3  | 0 | Low-quality    | Genome-fragment   | 19.73 | 0     |
| 58_vs_k141_157598[1]      | 2074  | No  |       | 0  | 1 | Not-determined | Genome-fragment   | NA    | 0     |
| 58_vs_k141_16448[1]       | 1903  | No  |       | 0  | 3 | Not-determined | Genome-fragment   | NA    | 0     |
| 517_vs_k141_60196[1]      | 11880 | No  |       | 5  | 0 | Low-quality    | Genome-fragment   | 19.76 | 0     |
| 58_vs_k141_97090[1]       | 1550  | No  |       | 0  | 0 | Not-determined | Genome-fragment   | NA    | 0     |
| 58_vs_k141_166439[1]      | 2140  | No  |       | 0  | 1 | Not-determined | Genome-fragment   | NA    | 0     |
| 512_extracted_k141_138733 | 11900 | No  |       | 5  | 0 | Low-quality    | Genome-fragment   | 39.61 | 0     |
| 58_vs_k141_44771[1]       | 3819  | No  |       | 0  | 3 | Not-determined | Genome-fragment   | NA    | 0     |
| 512_vs_k141_188548[1]     | 11901 | No  |       | 6  | 0 | Low-quality    | Genome-fragment   | 40.06 | 0     |
| 58_vs_k141_157650[1]      | 1003  | No  |       | 0  | 1 | Not-determined | Genome-fragment   | NA    | 0     |
| 56_vs_k141_38813[1]       | 11903 | No  |       | 10 | 0 | Low-quality    | Genome-fragment   | 31.75 | 0     |
| 58_vs_k141_183347[1]      | 2796  | No  |       | 0  | 0 | Not-determined | Genome-fragment   | NA    | 0     |
| 516_vs_105292[1]          | 11907 | No  |       | 0  | 2 | Low-quality    | Genome-fragment</ |       |       |



|                           |             |       |     |       |    |   |                |                 |       |       |
|---------------------------|-------------|-------|-----|-------|----|---|----------------|-----------------|-------|-------|
| 58_vs_k141_123284         | [full]      | 2444  | No  | NA    | 0  | 1 | Not-determined | Genome-fragment | NA    | 0     |
| 510_vs_k141_17781         | [full]      | 12005 | Yes | 5887  | 1  | 1 | Low-quality    | Genome-fragment | 9.03  | 50.96 |
| 58_vs_k141_200964         | [full]      | 5677  | No  | NA    | 0  | 0 | Not-determined | Genome-fragment | NA    | 0     |
| 58_vs_k141_131817         | [full]      | 2044  | No  | NA    | 0  | 1 | Not-determined | Genome-fragment | NA    | 0     |
| 58_vs_k141_105805         | [full]      | 1907  | No  | NA    | 0  | 1 | Not-determined | Genome-fragment | NA    | 0     |
| 58_vs_k141_183460         | [full]      | 1424  | No  | NA    | 3  | 0 | Not-determined | Genome-fragment | NA    | 0     |
| 57_vs_70467               | [full]      | 12008 | No  | NA    | 4  | 0 | Low-quality    | Genome-fragment | 26.13 | 0     |
| 58_vs_k141_10246          | [full]      | 3343  | No  | NA    | 0  | 3 | Not-determined | Genome-fragment | NA    | 0     |
| 58_vs_k141_62384          | [full]      | 2226  | No  | NA    | 0  | 0 | Not-determined | Genome-fragment | NA    | 0     |
| 58_vs_k141_53932          | [full]      | 4699  | No  | NA    | 0  | 1 | Not-determined | Genome-fragment | NA    | 0     |
| 58_vs_k141_123323         | [full]      | 2182  | No  | NA    | 0  | 2 | Not-determined | Genome-fragment | NA    | 0     |
| 58_vs_k141_149108         | [full]      | 20796 | No  | NA    | 6  | 0 | Not-determined | Genome-fragment | NA    | 0     |
| 58_vs_k141_140677         | [full]      | 2092  | No  | NA    | 0  | 0 | Not-determined | Genome-fragment | NA    | 0     |
| 58_vs_k141_183493         | [full]      | 1945  | No  | NA    | 0  | 0 | Not-determined | Genome-fragment | NA    | 0     |
| 58_vs_k141_166645         | [full]      | 2788  | No  | NA    | 0  | 0 | Not-determined | Genome-fragment | NA    | 0     |
| 514_vs_k141_255121        | [full]      | 12018 | No  | NA    | 3  | 0 | Low-quality    | Genome-fragment | 15.63 | 0     |
| 55_vs_k141_36890          | [0_partial] | 12025 | No  | NA    | 0  | 7 | Low-quality    | Genome-fragment | 15.88 | 0     |
| 516_vs_30089              | [full]      | 12026 | No  | NA    | 2  | 0 | Low-quality    | Genome-fragment | 21.13 | 0     |
| 58_vs_k141_44951          | [full]      | 1015  | No  | NA    | 0  | 0 | Not-determined | Genome-fragment | NA    | 0     |
| 58_vs_k141_114520         | [full]      | 4137  | No  | NA    | 0  | 2 | Not-determined | Genome-fragment | NA    | 0     |
| 58_vs_k141_10281          | [full]      | 1043  | No  | NA    | 0  | 1 | Not-determined | Genome-fragment | NA    | 0     |
| 58_vs_k141_53973          | [full]      | 1775  | No  | NA    | 0  | 0 | Not-determined | Genome-fragment | NA    | 0     |
| 54_extracted_1287         |             | 12030 | No  | NA    | 1  | 1 | Low-quality    | Genome-fragment | 13.76 | 0     |
| 58_vs_k141_105907         | [full]      | 2244  | No  | NA    | 0  | 1 | Not-determined | Genome-fragment | NA    | 0     |
| 58_vs_k141_44975          | [full]      | 2870  | No  | NA    | 0  | 0 | Not-determined | Genome-fragment | NA    | 0     |
| 513_extracted_141284      |             | 10336 | No  | NA    | 0  | 7 | Low-quality    | Genome-fragment | 5.48  | 0     |
| 51_vs_k141_25266          | [full]      | 10217 | No  | NA    | 0  | 0 | Low-quality    | Genome-fragment | 19    | 0     |
| 58_vs_k141_114548         | [full]      | 2662  | No  | NA    | 0  | 0 | Not-determined | Genome-fragment | NA    | 0     |
| 512_extracted_k141_148276 |             | 12038 | No  | NA    | 1  | 1 | Low-quality    | Genome-fragment | 30.97 | 0     |
| 516_extracted_167852      |             | 12041 | No  | NA    | 0  | 4 | Low-quality    | Genome-fragment | 16.71 | 0     |
| 53_extracted_k141_60732   |             | 12051 | No  | NA    | 3  | 0 | Low-quality    | Genome-fragment | 6.95  | 0     |
| 514_vs_k141_35119         | [0_partial] | 12060 | No  | NA    | 2  | 0 | Low-quality    | Genome-fragment | 29.91 | 0     |
| 58_vs_k141_45019          | [full]      | 4045  | No  | NA    | 0  | 1 | Not-determined | Genome-fragment | NA    | 0     |
| 58_vs_k141_131956         | [full]      | 2476  | No  | NA    | 0  | 2 | Not-determined | Genome-fragment | NA    | 0     |
| 58_vs_k141_157809         | [full]      | 2212  | No  | NA    | 0  | 1 | Not-determined | Genome-fragment | NA    | 0     |
| 58_vs_k141_131863         | [full]      | 6917  | No  | NA    | 0  | 7 | Not-determined | Genome-fragment | NA    | 0     |
| 58_vs_k141_80019          | [full]      | 2404  | No  | NA    | 0  | 0 | Not-determined | Genome-fragment | NA    | 0     |
| 515_extracted_63789       |             | 12066 | No  | NA    | 2  | 0 | Low-quality    | Genome-fragment | 13.14 | 0     |
| 58_vs_k141_65518          | [full]      | 1295  | No  | NA    | 1  | 1 | Not-determined | Genome-fragment | NA    | 0     |
| 515_vs_70800              | [full]      | 12074 | No  | NA    | 4  | 1 | Low-quality    | Genome-fragment | 7.18  | 0     |
| 58_vs_k141_36777          | [full]      | 3292  | No  | NA    | 0  | 2 | Not-determined | Genome-fragment | NA    | 0     |
| 512_vs_k141_26775         | [full]      | 12079 | No  | NA    | 1  | 0 | Low-quality    | Genome-fragment | 30.9  | 0     |
| 58_vs_k141_36785          | [full]      | 3420  | No  | NA    | 0  | 4 | Not-determined | Genome-fragment | NA    | 0     |
| 511_vs_k141_88836         | [full]      | 12084 | Yes | 10648 | 4  | 3 | Low-quality    | Genome-fragment | 18.01 | 11.88 |
| 58_vs_k141_106001         | [full]      | 1790  | No  | NA    | 0  | 0 | Not-determined | Genome-fragment | NA    | 0     |
| 58_vs_k141_192669         | [full]      | 3994  | No  | NA    | 0  | 1 | Not-determined | Genome-fragment | NA    | 0     |
| 58_vs_k141_206121         | [full]      | 12089 | No  | NA    | 1  | 2 | Low-quality    | Genome-fragment | 13.95 | 0     |
| 55_extracted_k141_112288  |             | 12116 | No  | NA    | 2  | 0 | Low-quality    | Genome-fragment | 14.73 | 0     |
| 58_vs_k141_149279         | [full]      | 3594  | No  | NA    | 0  | 0 | Not-determined | Genome-fragment | NA    | 0     |
| 58_vs_k141_183608         | [full]      | 7767  | No  | NA    | 0  | 2 | Not-determined | Genome-fragment | NA    | 0     |
| 58_vs_k141_28112          | [full]      | 1817  | No  | NA    | 0  | 2 | Not-determined | Genome-fragment | NA    | 0     |
| 58_vs_k141_54094          | [full]      | 2282  | No  | NA    | 0  | 0 | Not-determined | Genome-fragment | NA    | 0     |
| 58_vs_k141_131988         | [full]      | 2698  | No  | NA    | 0  | 2 | Not-determined | Genome-fragment | NA    | 0     |
| 58_vs_k141_10416          | [full]      | 12136 | No  | NA    | 0  | 3 | Not-determined | Genome-fragment | NA    | 0     |
| 513_extracted_11943       |             | 12127 | No  | NA    | 7  | 0 | Low-quality    | Genome-fragment | 34.43 | 0     |
| 58_vs_k141_88083          | [full]      | 4653  | No  | NA    | 0  | 1 | Not-determined | Genome-fragment | NA    | 0     |
| 58_vs_k141_149299         | [full]      | 1699  | No  | NA    | 0  | 1 | Not-determined | Genome-fragment | NA    | 0     |
| 58_vs_k141_175235         | [full]      | 36143 | No  | NA    | 11 | 0 | High-quality   | High-quality    | 96.8  | 0     |
| 58_vs_k141_123460         | [full]      | 1451  | No  | NA    | 0  | 0 | Not-determined | Genome-fragment | NA    | 0     |
| 56_vs_k141_4457           | [0_partial] | 12131 | Yes | 5187  | 3  | 2 | Low-quality    | Genome-fragment | 18.08 | 57.24 |
| 51_vs_k141_128148         | [full]      | 12132 | No  | NA    | 5  | 0 | Low-quality    | Genome-fragment | 25.98 | 0     |
| 516_extracted_86911       |             | 12113 | No  | NA    | 13 | 0 | Low-quality    | Genome-fragment | 20.08 | 0     |
| 52_extracted_k141_17727   |             | 12137 | No  | NA    | 2  | 0 | Low-quality    | Genome-fragment | 23.73 | 0     |
| 58_vs_k141_183637         | [full]      | 2594  | No  | NA    | 0  | 0 | Not-determined | Genome-fragment | NA    | 0     |
| 58_vs_k141_28154          | [full]      | 2234  | No  | NA    | 0  | 3 | Not-determined | Genome-fragment | NA    | 0     |
| 512_vs_k141_135479        | [full]      | 12145 | No  | NA    | 1  | 2 | Low-quality    | Genome-fragment | 10.97 | 0     |
| 57_vs_65238               | [full]      | 12146 | No  | NA    | 4  | 0 | Low-quality    | Genome-fragment | 35.99 | 0     |
| 58_vs_k141_96336          | [full]      | 12183 | No  | NA    | 8  | 0 | Low-quality    | Genome-fragment | 28.29 | 0     |
| 58_vs_k141_146688         | [full]      | 1366  | No  | NA    | 0  | 0 | Not-determined | Genome-fragment | NA    | 0     |
| 58_vs_k141_54121          | [full]      | 12113 | No  | NA    | 0  | 6 | Not-determined | Genome-fragment | NA    | 0     |
| 58_vs_k141_157919         | [full]      | 1159  | No  | NA    | 0  | 0 | Not-determined | Genome-fragment | NA    | 0     |
| 510_vs_11207              | [full]      | 12185 | No  | NA    | 0  | 1 | Low-quality    | Genome-fragment | 21.02 | 0     |
| 58_vs_k141_54136          | [full]      | 3095  | No  | NA    | 0  | 1 | Not-determined | Genome-fragment | NA    | 0     |
| 58_vs_k141_19761          | [full]      | 1460  | No  | NA    | 0  | 0 | Not-determined | Genome-fragment | NA    | 0     |
| 58_vs_k141_123492         | [full]      | 9783  | No  | NA    | 8  | 0 | Not-determined | Genome-fragment | NA    | 0     |
| 58_vs_k141_193029         | [full]      | 1461  | No  | NA    | 0  | 0 | Not-determined | Genome-fragment | NA    | 0     |
| 517_extracted_k141_147828 |             | 12186 | No  | NA    | 5  | 0 | Low-quality    | Genome-fragment | 15.13 | 0     |
| 57_vs_4529                | [full]      | 12187 | No  | NA    | 7  | 0 | Low-quality    | Genome-fragment | 32.95 | 0     |
| 51_vs_k141_52342          | [full]      | 12193 | No  | NA    | 0  | 0 | Not-determined | Genome-fragment | NA    | 0     |
| 58_vs_k141_88731          | [full]      | 5335  | No  | NA    | 0  | 0 | Not-determined | Genome-fragment | NA    | 0     |
| 58_vs_k141_1587           | [full]      | 4752  | No  | NA    | 0  | 1 | Not-determined | Genome-fragment | NA    | 0     |
| 58_vs_k141_193044         | [full]      | 1896  | No  | NA    | 0  | 1 | Not-determined | Genome-fragment | NA    | 0     |
| 58_vs_k141_132053         | [full]      | 1752  | No  | NA    | 0  | 0 | Not-determined | Genome-fragment | NA    | 0     |
| 58_vs_k141_80155          | [full]      | 4738  | No  | NA    | 0  | 0 | Not-determined | Genome-fragment | NA    | 0     |
| 58_vs_k141_193046         | [full]      | 3516  | No  | NA    | 0  | 0 | Not-determined | Genome-fragment | NA    | 0     |
| 514_extracted_k141_30438  |             | 12223 | No  | NA    | 6  | 0 | Low-quality    | Genome-fragment | 20.49 | 0     |
| 53_vs_k141_51886          | [full]      | 12235 | Yes | 11083 | 2  | 1 | Low-quality    | Genome-fragment | 25.31 | 9.42  |
| 517_vs_k141_52618         | [full]      | 12243 | Yes | 1127  | 1  | 2 | Low-quality    | Genome-fragment | 0.71  | 90.79 |
| 58_vs_k141_157862         | [full]      | 1759  | No  | NA    | 0  | 2 | Not-determined | Genome-fragment | NA    | 0     |
| 513_extracted_100646      |             | 12243 | No  | NA    | 0  | 5 | Low-quality    | Genome-fragment | 2.14  | 0     |
| 53_vs_k141_25953          | [full]      | 12243 | No  | NA    | 1  | 0 | Low-quality    | Genome-fragment | 32.4  | 0     |
| 58_vs_k141_157974         | [full]      | 2143  | No  | NA    | 0  | 2 | Not-determined | Genome-fragment | NA    | 0     |
| 517_extracted_k141_31368  |             | 12245 | No  | NA    | 0  | 2 | Low-quality    | Genome-fragment | 10.68 | 0     |
| 58_vs_k141_80185          | [full]      | 1393  | No  | NA    | 0  | 0 | Not-determined | Genome-fragment | NA    | 0     |
| 58_vs_k141_202102         | [full]      | 1544  | No  | NA    | 0  | 0 | Not-determined | Genome-fragment | NA    | 0     |
| 53_extracted_k141_112575  |             | 12247 | No  | NA    | 5  | 0 | Low-quality    | Genome-fragment | 30.42 | 0     |
| 58_vs_k141_106145         | [full]      | 2780  | No  | NA    | 0  | 3 | Not-determined | Genome-fragment | NA    | 0     |
| 58_vs_k141_129210         | [0_partial] | 12251 | No  | NA    | 3  | 1 | Low-quality    | Genome-fragment | 22.16 | 0     |
| 57_extracted_89110        |             | 12256 | No  | NA    | 0  | 0 | Low-quality    | Genome-fragment | 29.81 | 0     |
| 53_extracted_k141_41491   |             | 12262 | No  | NA    | 14 | 0 | Low-quality    | Genome-fragment | 32.92 | 0     |
| 55_extracted_k141_128166  |             | 12269 | No  | NA    | 0  | 1 | Low-quality    | Genome-fragment | 6.97  | 0     |
| 58_vs_k141_54181          | [full]      | 43572 | No  | NA    | 1  | 0 | High-quality   | High-quality    | 100   | 0     |
| 58_vs_k141_80222          | [full]      | 12275 | No  | NA    | 0  | 1 | Not-determined | Genome-fragment | NA    | 0     |
| 514_vs_k141_83720         | [full]      | 12275 | No  | NA    | 1  | 6 | Low-quality    | Genome-fragment | 14.73 | 0     |
| 58_vs_k141_123603         | [full]      | 1550  | No  | NA    | 2  | 0 | Not-determined | Genome-fragment | NA    | 0     |
| 53_vs_k141_78481          | [full]      | 12291 | No  | NA    | 3  | 0 | Low-quality    | Genome-fragment | 8.4   | 0     |
| 58_vs_k141_54212          | [full]      | 1323  | No  | NA    | 0  | 1 | Not-determined | Genome-fragment | NA    | 0     |
| 58_vs_k141_62736          | [full]      | 2533  | No  | NA    | 0  | 0 | Not-determined | Genome-fragment | NA    | 0     |
| 58_extracted_k141_159370  |             | 12301 | No  | NA    | 0  | 0 | Low-quality    | Genome-fragment | 37.36 | 0     |
| 58_vs_k141_77838          | [full]      | 12313 | No  | NA    | 3  | 1 | Low-quality    | Genome-fragment | 34.07 | 0     |
| 51_extracted_k141_103657  |             | 12318 | No  | NA    | 4  | 2 | Low-quality    | Genome-fragment | 21.33 | 0     |
| 58_vs_k141_114809         | [full]      | 1093  | No  | NA    | 0  | 0 | Not-determined | Genome-fragment | NA    | 0     |
| 55_extracted_k141_11723   |             | 12326 | No  | NA    | 17 | 0 | Low-quality    | Genome-fragment | 25.77 | 0     |
| 55_extracted_k141_68549   |             | 12335 | No  | NA    | 0  | 5 | Low-quality    | Genome-fragment | 6.91  | 0     |
| 514_extracted_k141_51440  |             | 12370 | No  | NA    | 14 | 0 | Low-quality    | Genome-fragment | 32.35 | 0     |
| 513_extracted_144316      |             | 12400 | No  | NA    | 2  | 1 | Low-quality    | Genome-fragment | 12.9  | 0     |
| 58_vs_k141_28288          | [full]      | 1701  | No  | NA    | 0  | 2 | Not-determined | Genome-fragment | NA    | 0     |
| 58_vs_k141_106220         | [full]      | 4770  | No  | NA    | 0  | 3 | Not-determined | Genome-fragment | NA    | 0     |
| 58_vs_k141_19307          | [full]      | 2352  | No  | NA    | 0  | 0 | Not-determined | Genome-fragment | NA    | 0     |
| 58_vs_k141_54215          | [full]      | 1787  | No  | NA    | 0  | 2 | Not-determined | Genome-fragment | NA    | 0     |
| 515_vs_2862               | [full]      | 12404 | No  | NA    | 1  | 2 | Low-quality    | Genome-fragment | 7.65  | 0     |
| 58_vs_k141_19318          | [full]      | 3407  | No  | NA    | 0  | 2 | Not-determined | Genome-fragment | NA    | 0     |
| 58_vs_k141_79829          | [0_partial] | 12405 | No  | NA    | 1  | 8 | Low-quality    | Genome-fragment | 14.34 | 0     |
| 58_vs_k141_45301          | [full]      | 2487  | No  | NA    | 0  | 1 | Not-determined | Genome-fragment | NA    | 0     |
| 58_vs_k141_88976          | [full]      | 1545  | No  | NA    | 0  | 1 | Not-determined | Genome-fragment | NA    | 0     |
| 55_extracted_k141_121030  |             | 12412 | No  | NA    | 1  | 0 | Low-quality    | Genome-fragment | 22.44 | 0     |
| 53_vs_k141_1238           | [full]      | 12414 | No  | NA    | 1  | 1 | Low-quality    | Genome-fragment | 22.52 | 0     |
| 58_vs_k141_175506         | [full]      | 1297  | No  | NA    | 0  | 0 | Not-determined | Genome-fragment | NA    | 0     |
| 58_vs_k141_62858          | [full]      | 1251  | No  | NA    | 0  | 0 | Not-determined | Genome-fragment | NA    | 0     |
| 58_vs_k141_28311          | [full]      | 45747 | No  | NA    | 4  | 2 | High-quality   | High-quality    | 100   | 0     |
| 55_vs_k141_134223         | [full]      | 12422 | No  | NA    | 9  | 0 | Low-quality    | Genome-fragment | 30.36 | 0     |
| 58_vs_k141_106302         | [full]      | 1704  | No  | NA    | 0  | 0 | Not-determined | Genome-fragment | NA    | 0     |
| 58_vs_k141_45338          | [full]      | 8002  | No  | NA    | 0  | 4 | Not-determined | Genome-fragment | NA    | 0     |
| 55_vs_k141_22266          | [full]      | 12424 | No  | NA    | 9  | 0 | Low-quality    | Genome-fragment | 29.6  | 0     |
| 58_vs_k141_28326          | [full]      | 1297  | No  | NA    |    |   |                |                 |       |       |



|                               |       |     |      |    |                |                 |                 |       |       |
|-------------------------------|-------|-----|------|----|----------------|-----------------|-----------------|-------|-------|
| 514_extracted_k141_28606      | 12546 | No  | NA   | 7  | 1              | Low-quality     | Genome-fragment | 28.79 | 0     |
| 517_extracted_k141_116256     | 12551 | No  | NA   | 4  | 1              | Low-quality     | Genome-fragment | 38.63 | 0     |
| 58_vs_k141_159428  full       | 8971  | No  | NA   | 0  | 6              | Not-determined  | Genome-fragment | NA    | 0     |
| 58_vs_k141_106543  full       | 1395  | No  | NA   | 0  | 0              | Not-determined  | Genome-fragment | NA    | 0     |
| 58_vs_k141_123901  full       | 3059  | No  | NA   | 0  | 2              | Not-determined  | Genome-fragment | NA    | 0     |
| 58_vs_k141_171621  full       | 2277  | No  | NA   | 0  | 1              | Not-determined  | Genome-fragment | NA    | 0     |
| 58_vs_k141_175709  full       | 1063  | No  | NA   | 0  | 0              | Not-determined  | Genome-fragment | NA    | 0     |
| 58_vs_k141_193451  full       | 2705  | No  | NA   | 0  | 1              | Not-determined  | Genome-fragment | NA    | 0     |
| 58_vs_k141_147166  full       | 12554 | No  | NA   | 15 | 0              | Not-determined  | Genome-fragment | 28.93 | 0     |
| 517_extracted_k141_634        | 12562 | Yes | 9270 | 2  | 3              | Low-quality     | Genome-fragment | 3.7   | 26.21 |
| 58_vs_k141_115062  full       | 2957  | No  | NA   | 0  | 1              | Not-determined  | Genome-fragment | NA    | 0     |
| 58_vs_k141_175746  full       | 2426  | No  | NA   | 0  | 0              | Not-determined  | Genome-fragment | NA    | 0     |
| 58_vs_k141_2417  full         | 4174  | No  | NA   | 0  | 3              | Not-determined  | Genome-fragment | NA    | 0     |
| 58_extracted_k141_86050       | 12576 | No  | NA   | 4  | 0              | Low-quality     | Genome-fragment | 30.5  | 0     |
| 56_vs_k141_9568  full         | 12583 | No  | NA   | 4  | 0              | Low-quality     | Genome-fragment | 30.24 | 0     |
| 58_vs_k141_141270  full       | 1571  | No  | NA   | 3  | 1              | Low-quality     | Genome-fragment | NA    | 0     |
| 57_vs_49009  full             | 12593 | No  | NA   | 7  | 0              | Low-quality     | Genome-fragment | 42.39 | 0     |
| 58_vs_k141_167184  full       | 4437  | No  | NA   | 0  | 3              | Not-determined  | Genome-fragment | NA    | 0     |
| 58_vs_k141_196761  full       | 1940  | No  | NA   | 0  | 3              | Not-determined  | Genome-fragment | NA    | 0     |
| 58_vs_k141_138275  full       | 12620 | No  | NA   | 7  | 0              | Low-quality     | Genome-fragment | 35.27 | 0     |
| 58_vs_k141_184059  full       | 5004  | No  | NA   | 0  | 1              | Not-determined  | Genome-fragment | NA    | 0     |
| 512_vs_k141_170396  full      | 12628 | No  | NA   | 5  | 0              | Low-quality     | Genome-fragment | 29.83 | 0     |
| 58_vs_k141_149765  full       | 2354  | No  | NA   | 0  | 2              | Not-determined  | Genome-fragment | NA    | 0     |
| 58_vs_k141_141244  full       | 1016  | No  | NA   | 0  | 1              | Not-determined  | Genome-fragment | NA    | 0     |
| 58_vs_k141_193515  full       | 1422  | No  | NA   | 0  | 2              | Not-determined  | Genome-fragment | NA    | 0     |
| 516_vs_19889  full            | 12631 | No  | NA   | 3  | 1              | Low-quality     | Genome-fragment | 18.24 | 0     |
| 51_extracted_k141_104407      | 12642 | No  | NA   | 5  | 0              | Low-quality     | Genome-fragment | 28.45 | 0     |
| 58_vs_k141_193530  full       | 2746  | No  | NA   | 0  | 2              | Not-determined  | Genome-fragment | NA    | 0     |
| 58_vs_k141_18777  full        | 2445  | No  | NA   | 0  | 1              | Not-determined  | Genome-fragment | NA    | 0     |
| 58_vs_k141_124057  full       | 1731  | No  | NA   | 0  | 0              | Not-determined  | Genome-fragment | NA    | 0     |
| 58_vs_k141_80607  full        | 1183  | No  | NA   | 0  | 0              | Not-determined  | Genome-fragment | NA    | 0     |
| 52_vs_k141_134621  full       | 12645 | No  | NA   | 0  | 0              | Low-quality     | Genome-fragment | 21.44 | 0     |
| 58_vs_k141_175850  full       | 5473  | No  | NA   | 0  | 3              | Not-determined  | Genome-fragment | NA    | 0     |
| 512_extracted_k141_93276      | 12646 | No  | NA   | 4  | 0              | Low-quality     | Genome-fragment | 42.41 | 0     |
| 58_vs_k141_132472  full       | 20524 | No  | NA   | 0  | 11             | Medium-quality  | Genome-fragment | 71.49 | 0     |
| 57_vs_47201  full             | 12648 | No  | NA   | 0  | 0              | Low-quality     | Genome-fragment | NA    | 0     |
| 58_vs_k141_167247  full       | 2174  | No  | NA   | 0  | 0              | Not-determined  | Genome-fragment | NA    | 0     |
| 516_extracted_54812           | 12650 | No  | NA   | 12 | 0              | Low-quality     | Genome-fragment | 26.44 | 0     |
| 58_vs_k141_197572  full       | 8429  | No  | NA   | 1  | 1              | Not-determined  | Genome-fragment | NA    | 0     |
| 58_vs_k141_141318  full       | 1033  | No  | NA   | 0  | 1              | Not-determined  | Genome-fragment | NA    | 0     |
| 58_vs_k141_167266  full       | 3992  | No  | NA   | 0  | 1              | Not-determined  | Genome-fragment | NA    | 0     |
| 51_vs_k141_143433  full       | 12653 | No  | NA   | 0  | 0              | Low-quality     | Genome-fragment | 32.61 | 0     |
| 58_vs_k141_184122  full       | 1275  | No  | NA   | 0  | 0              | Not-determined  | Genome-fragment | NA    | 0     |
| 58_vs_k141_63277  full        | 18362 | No  | NA   | 15 | 0              | Medium-quality  | Genome-fragment | 50.42 | 0     |
| 58_vs_k141_158265  full       | 28476 | No  | NA   | 0  | 6              | Not-determined  | Genome-fragment | NA    | 0     |
| 517_vs_k141_81387  full       | 12654 | No  | NA   | 0  | 0              | Low-quality     | Genome-fragment | 33.65 | 0     |
| 58_vs_k141_184135  full       | 3181  | No  | NA   | 0  | 1              | Not-determined  | Genome-fragment | NA    | 0     |
| 510_vs_87403  0_partial       | 12654 | No  | NA   | 0  | 3              | Low-quality     | Genome-fragment | 3.93  | 0     |
| 58_vs_k141_132514  full       | 2278  | No  | NA   | 0  | 0              | Not-determined  | Genome-fragment | NA    | 0     |
| 55_vs_k141_120504  full       | 12683 | No  | NA   | 9  | 0              | Low-quality     | Genome-fragment | 28.01 | 0     |
| 514_vs_k141_47308  0_partial  | 12687 | No  | NA   | 4  | 2              | Low-quality     | Genome-fragment | 44.22 | 0     |
| 58_vs_k141_63301  full        | 1012  | No  | NA   | 0  | 0              | Not-determined  | Genome-fragment | NA    | 0     |
| 58_vs_k141_80687  full        | 4069  | No  | NA   | 0  | 2              | Not-determined  | Genome-fragment | NA    | 0     |
| 58_vs_k141_141347  full       | 5932  | No  | NA   | 0  | 3              | Not-determined  | Genome-fragment | NA    | 0     |
| 58_vs_k141_149899  full       | 2546  | No  | NA   | 0  | 0              | Not-determined  | Genome-fragment | NA    | 0     |
| 514_extracted_k141_20590      | 12708 | No  | NA   | 0  | 3              | Low-quality     | Genome-fragment | 24.46 | 0     |
| 58_vs_k141_19805  full        | 2436  | No  | NA   | 0  | 0              | Not-determined  | Genome-fragment | NA    | 0     |
| 514_vs_k141_106224  full      | 12710 | No  | NA   | 1  | 0              | Low-quality     | Genome-fragment | 28.43 | 0     |
| 58_vs_k141_80713  full        | 3511  | No  | NA   | 0  | 0              | Not-determined  | Genome-fragment | NA    | 0     |
| 53_vs_k141_34600  full        | 12717 | No  | NA   | 11 | 0              | Low-quality     | Genome-fragment | 37.12 | 0     |
| 58_vs_k141_132569  full       | 1157  | No  | NA   | 0  | 2              | Not-determined  | Genome-fragment | NA    | 0     |
| 58_vs_k141_115213  full       | 4363  | No  | NA   | 0  | 4              | Not-determined  | Genome-fragment | NA    | 0     |
| 516_extracted_41171           | 12718 | No  | NA   | 5  | 0              | Low-quality     | Genome-fragment | 20.84 | 0     |
| 58_vs_k141_89258  full        | 1293  | No  | NA   | 0  | 0              | Not-determined  | Genome-fragment | NA    | 0     |
| 512_vs_k141_172635  0_partial | 12726 | No  | NA   | 0  | 0              | Low-quality     | Genome-fragment | 16.86 | 0     |
| 58_vs_k141_149927  full       | 16615 | No  | NA   | 0  | 2              | Not-determined  | Genome-fragment | NA    | 0     |
| 516_extracted_144673          | 12735 | No  | NA   | 3  | 0              | Low-quality     | Genome-fragment | 20.04 | 0     |
| 58_vs_k141_97878  full        | 3180  | No  | NA   | 0  | 1              | Not-determined  | Genome-fragment | NA    | 0     |
| 51_vs_k141_137488  full       | 12737 | No  | NA   | 0  | 0              | Not-determined  | Genome-fragment | 29.08 | 0     |
| 512_extracted_k141_98849      | 12744 | No  | NA   | 2  | 0              | Low-quality     | Genome-fragment | 25.16 | 0     |
| 58_vs_k141_63411  full        | 1371  | No  | NA   | 0  | 0              | Not-determined  | Genome-fragment | NA    | 0     |
| 57_vs_14581  full             | 12745 | No  | NA   | 0  | 0              | Low-quality     | Genome-fragment | 44.36 | 0     |
| 510_extracted_50078           | 12749 | No  | NA   | 2  | 0              | Low-quality     | Genome-fragment | 9.38  | 0     |
| 511_vs_k141_78031  full       | 12755 | No  | NA   | 7  | 0              | Low-quality     | Genome-fragment | 21.99 | 0     |
| 58_vs_k141_17441  full        | 6914  | No  | NA   | 2  | Not-determined | Genome-fragment | NA              | 0     | 0     |
| 58_vs_k141_89339  full        | 5144  | No  | NA   | 0  | 2              | Not-determined  | Genome-fragment | NA    | 0     |
| 58_vs_k141_80771  full        | 1599  | No  | NA   | 0  | 1              | Not-determined  | Genome-fragment | NA    | 0     |
| 511_vs_k141_147801  full      | 12765 | No  | NA   | 1  | 4              | Low-quality     | Genome-fragment | 11.53 | 0     |
| 58_vs_k141_15687  full        | 12775 | No  | NA   | 8  | 3              | Low-quality     | Genome-fragment | 35.67 | 0     |
| 516_vs_36771  full            | 12776 | No  | NA   | 0  | 3              | Low-quality     | Genome-fragment | 13.37 | 0     |
| 51_vs_k141_157822  full       | 12789 | No  | NA   | 11 | 0              | Low-quality     | Genome-fragment | 35.43 | 0     |
| 57_vs_4472  0_partial         | 12790 | Yes | 6734 | 3  | 1              | Low-quality     | Genome-fragment | 6.77  | 47.25 |
| 58_vs_k141_54718  full        | 1385  | No  | NA   | 0  | 0              | Not-determined  | Genome-fragment | NA    | 0     |
| 58_vs_k141_2325  0_partial    | 12793 | No  | NA   | 1  | 3              | Low-quality     | Genome-fragment | 11.55 | 0     |
| 58_vs_k141_115321  full       | 1088  | No  | NA   | 0  | 0              | Not-determined  | Genome-fragment | NA    | 0     |
| 58_extracted_k141_99414       | 12797 | No  | NA   | 1  | 2              | Low-quality     | Genome-fragment | 26.83 | 0     |
| 511_vs_k141_80473  full       | 12800 | No  | NA   | 1  | 0              | Low-quality     | Genome-fragment | 7.87  | 0     |
| 58_vs_k141_115318  full       | 2852  | No  | NA   | 0  | 1              | Not-determined  | Genome-fragment | NA    | 0     |
| 516_vs_14789  full            | 12815 | No  | NA   | 0  | 1              | Low-quality     | Genome-fragment | 23.25 | 0     |
| 58_vs_k141_19939  full        | 3042  | No  | NA   | 0  | 0              | Not-determined  | Genome-fragment | NA    | 0     |
| 58_vs_k141_124526  full       | 12819 | No  | NA   | 1  | 1              | Low-quality     | Genome-fragment | 7.51  | 0     |
| 58_vs_k141_80816  full        | 2754  | No  | NA   | 0  | 3              | Not-determined  | Genome-fragment | NA    | 0     |
| 55_extracted_k141_54812       | 12820 | No  | NA   | 1  | 3              | Low-quality     | Genome-fragment | 6.95  | 0     |
| 58_vs_k141_11037  full        | 2100  | No  | NA   | 0  | 0              | Not-determined  | Genome-fragment | NA    | 0     |
| 511_vs_k141_45024  full       | 12822 | No  | NA   | 14 | 0              | Low-quality     | Genome-fragment | 22.49 | 0     |
| 55_extracted_k141_51328       | 12824 | No  | NA   | 3  | 0              | Low-quality     | Genome-fragment | 30.85 | 0     |
| 58_vs_k141_2718  full         | 1532  | No  | NA   | 0  | 1              | Not-determined  | Genome-fragment | NA    | 0     |
| 58_vs_k141_201819  full       | 5894  | No  | NA   | 0  | 3              | Not-determined  | Genome-fragment | NA    | 0     |
| 58_vs_k141_1730  full         | 1610  | No  | NA   | 0  | 1              | Not-determined  | Genome-fragment | NA    | 0     |
| 58_vs_k141_80835  full        | 5371  | No  | NA   | 0  | 2              | Not-determined  | Genome-fragment | NA    | 0     |
| 517_vs_k141_29084  full       | 12825 | No  | NA   | 1  | 1              | Low-quality     | Genome-fragment | 7.16  | 0     |
| 53_extracted_k141_215541      | 12827 | No  | NA   | 12 | 0              | Not-determined  | Genome-fragment | 30.34 | 0     |
| 58_vs_k141_115319  full       | 6815  | No  | NA   | 0  | 2              | Not-determined  | Genome-fragment | NA    | 0     |
| 516_vs_146364  full           | 12831 | No  | NA   | 3  | 0              | Low-quality     | Genome-fragment | 11.56 | 0     |
| 513_extracted_31277           | 12837 | No  | NA   | 0  | 1              | Low-quality     | Genome-fragment | 7.9   | 0     |
| 58_vs_k141_158459  full       | 1927  | No  | NA   | 0  | 2              | Not-determined  | Genome-fragment | NA    | 0     |
| 58_vs_k141_97995  full        | 1129  | No  | NA   | 0  | 0              | Not-determined  | Genome-fragment | NA    | 0     |
| 516_vs_1476  full             | 12843 | No  | NA   | 3  | 0              | Low-quality     | Genome-fragment | 36.92 | 0     |
| 512_vs_k141_94804  full       | 12845 | No  | NA   | 0  | 0              | Low-quality     | Genome-fragment | 21.91 | 0     |
| 58_vs_k141_184321  full       | 2112  | No  | NA   | 0  | 4              | Not-determined  | Genome-fragment | NA    | 0     |
| 58_vs_k141_201897  full       | 2577  | No  | NA   | 0  | 0              | Not-determined  | Genome-fragment | NA    | 0     |
| 516_extracted_164572          | 12849 | No  | NA   | 0  | 0              | Low-quality     | Genome-fragment | 42.69 | 0     |
| 516_vs_95178  full            | 12869 | No  | NA   | 1  | 1              | Low-quality     | Genome-fragment | 22.9  | 0     |
| 58_vs_k141_20039  full        | 5456  | No  | NA   | 0  | 5              | Not-determined  | Genome-fragment | NA    | 0     |
| 58_vs_k141_175216  full       | 7167  | No  | NA   | 0  | 2              | Not-determined  | Genome-fragment | NA    | 0     |
| 58_vs_k141_98046  full        | 2195  | No  | NA   | 0  | 0              | Not-determined  | Genome-fragment | NA    | 0     |
| 58_vs_k141_71601  full        | 1799  | No  | NA   | 0  | 0              | Not-determined  | Genome-fragment | NA    | 0     |
| 58_vs_k141_132700  full       | 1784  | No  | NA   | 0  | 2              | Not-determined  | Genome-fragment | NA    | 0     |
| 516_extracted_33815           | 12878 | No  | NA   | 4  | 1              | Low-quality     | Genome-fragment | 27.66 | 0     |
| 58_vs_k141_20066  full        | 1764  | No  | NA   | 0  | 2              | Not-determined  | Genome-fragment | NA    | 0     |
| 58_vs_k141_80973  full        | 1179  | No  | NA   | 0  | 1              | Not-determined  | Genome-fragment | NA    | 0     |
| 58_vs_k141_29005  full        | 1887  | No  | NA   | 0  | 1              | Not-determined  | Genome-fragment | NA    | 0     |
| 517_extracted_k141_81839      | 12886 | No  | NA   | 1  | 1              | Low-quality     | Genome-fragment | 17.29 | 0     |
| 512_vs_k141_3913  full        | 12895 | No  | NA   | 1  | 0              | Low-quality     | Genome-fragment | 15.29 | 0     |
| 58_vs_k141_80070  full        | 2135  | No  | NA   | 0  | 0              | Not-determined  | Genome-fragment | NA    | 0     |
| 58_vs_k141_132724  full       | 5333  | No  | NA   | 0  | 3              | Not-determined  | Genome-fragment | NA    | 0     |
| 58_vs_k141_48683  full        | 1257  | No  | NA   | 0  | 1              | Not-determined  | Genome-fragment | NA    | 0     |
| 58_vs_k141_184402  full       | 2691  | No  | NA   | 0  | 3              | Not-determined  | Genome-fragment | NA    | 0     |
| 517_vs_k141_90767  full       | 12907 | No  | NA   | 0  | 1              | Low-quality     | Genome-fragment | 12.13 | 0     |
| 58_vs_k141_132762  full       | 1495  | No  | NA   | 0  | 0              | Not-determined  | Genome-fragment | NA    | 0     |
| 58_vs_k141_150125  full       | 3284  | No  | NA   | 0  | 2              | Not-determined  | Genome-fragment | NA    | 0     |
| 58_vs_k141_124419  full       | 1961  | No  | NA   | 0  | 1              | Not-determined  | Genome-fragment | NA    | 0     |
| 58_vs_k141_80975  full        | 2632  | No  | NA   | 0  | 2              | Not-determined  | Genome-fragment | NA    | 0     |
| 58_vs_k141_98141  full        | 1842  | No  | NA   | 0  | 2              | Not-determined  | Genome-fragment | NA    | 0     |
| 58_vs_k141_158598  full       | 2017  | No  | NA   | 0  | 2              | Not-determined  | Genome-fragment | NA    | 0     |
| 57_vs_112452  full            | 12914 | No  | NA   | 4  | 0              | Low-quality     | Genome-fragment | 31.54 | 0     |
| 58_vs_k141_124445  full       | 5140  | No  | NA   | 0  | 1              | Not-determined  | Genome-fragment | NA    | 0     |
| 512_extracted_k141_5532       | 12951 | No  | NA   | 3  | 0              | Low-quality     | Genome-fragment | 20.47 | 0     |
| 58_vs_k141_106955  full       | 1278  | No  | NA   | 0  | 3              | Not-determined  | Genome-fragment | NA    | 0     |
| 511_vs_k141_52627  full       | 12956 | No  | NA   | 6  | 0              | Low-quality     | Genome-fragment | 22.4  | 0     |
| 58_vs_k141_17634  full        | 2645  | No  | NA   | 0  | 2              | Not-determined  | Genome-fragment | NA    | 0     |
| 512_extracted_k141_174402     | 12959 | No  | NA   | 1  | 0              | Low-quality     | Genome-fragment | 7.79  | 0     |
| 58_vs_k141_106964  full       | 638   |     |      |    |                |                 |                 |       |       |



|                            |        |     |       |    |                |                 |                 |       |       |
|----------------------------|--------|-----|-------|----|----------------|-----------------|-----------------|-------|-------|
| 517_extracted_k141_26633   | 13060  | NA  | 0     | 6  | Low-quality    | Genome-fragment | 11.31           | 0     |       |
| 517_extracted_k141_26633   | 13073  | NA  | 0     | 10 | Low-quality    | Genome-fragment | 5.95            | 0     |       |
| 512_vs_k141_132289         | 13086  | NA  | 4     | 0  | Low-quality    | Genome-fragment | 43.89           | 0     |       |
| 58_vs_k141_115671          | 2561   | NA  | 0     | 2  | Not-determined | Genome-fragment | NA              | 0     |       |
| 58_vs_k141_89679           | 3177   | NA  | 0     | 3  | Not-determined | Genome-fragment | NA              | 0     |       |
| 516_vs_26095               | 13092  | NA  | 15    | 0  | Low-quality    | Genome-fragment | 40.05           | 0     |       |
| 58_vs_k141_37751           | 2131   | NA  | 0     | 1  | Not-determined | Genome-fragment | NA              | 0     |       |
| 516_vs_120907              | 13097  | NA  | 6     | 0  | Low-quality    | Genome-fragment | 26.29           | 0     |       |
| 58_vs_k141_153320          | 13100  | NA  | 0     | 3  | Low-quality    | Genome-fragment | 4.69            | 0     |       |
| 58_vs_k141_89701           | 1675   | NA  | 0     | 0  | Not-determined | Genome-fragment | NA              | 0     |       |
| 53_vs_k141_80384           | 13106  | NA  | 2     | 0  | Low-quality    | Genome-fragment | 36.86           | 0     |       |
| 58_vs_k141_21802           | 1049   | NA  | 0     | 0  | Not-determined | Genome-fragment | NA              | 0     |       |
| 514_vs_k141_101601         | 13113  | Yes | 7089  | 3  | Low-quality    | Genome-fragment | 11.03           | 45.94 |       |
| 58_vs_k141_150263          | 3094   | NA  | 0     | 2  | Not-determined | Genome-fragment | NA              | 0     |       |
| 511_vs_k141_59044          | 13127  | NA  | 6     | 0  | Low-quality    | Genome-fragment | 22.05           | 0     |       |
| 517_vs_k141_35500          | 13135  | NA  | 0     | 0  | Low-quality    | Genome-fragment | 16.31           | 0     |       |
| 58_vs_k141_55115           | 3626   | NA  | 0     | 1  | Not-determined | Genome-fragment | NA              | 0     |       |
| 512_vs_k141_87401          | 13139  | NA  | 8     | 1  | Low-quality    | Genome-fragment | 36.05           | 0     |       |
| 58_vs_k141_141796          | 1349   | NA  | 0     | 0  | Not-determined | Genome-fragment | NA              | 0     |       |
| 58_vs_k141_20357           | 11834  | NA  | 0     | 11 | Not-determined | Genome-fragment | NA              | 0     |       |
| 58_vs_k141_141802          | 2165   | NA  | 0     | 1  | Not-determined | Genome-fragment | NA              | 0     |       |
| 512_vs_k141_97523          | 13139  | NA  | 14    | 1  | Low-quality    | Genome-fragment | 21.44           | 0     |       |
| 58_vs_k141_202171          | 1127   | NA  | 0     | 2  | Not-determined | Genome-fragment | NA              | 0     |       |
| 58_vs_k141_29205           | 3902   | NA  | 0     | 0  | Not-determined | Genome-fragment | NA              | 0     |       |
| 58_vs_k141_184511          | 13152  | NA  | 1     | 1  | Low-quality    | Genome-fragment | 33.83           | 0     |       |
| 53_extracted_k141_80559    | 13172  | NA  | 1     | 1  | Low-quality    | Genome-fragment | 27.48           | 0     |       |
| 58_vs_k141_71871           | 1543   | NA  | 0     | 1  | Not-determined | Genome-fragment | NA              | 0     |       |
| 58_vs_k141_55149           | 2821   | NA  | 0     | 1  | Not-determined | Genome-fragment | NA              | 0     |       |
| 58_vs_k141_141827          | 4844   | NA  | 0     | 1  | Not-determined | Genome-fragment | NA              | 0     |       |
| 58_vs_k141_98413           | 3972   | NA  | 0     | 3  | Not-determined | Genome-fragment | NA              | 0     |       |
| 58_vs_k141_81205           | 2629   | NA  | 0     | 2  | Not-determined | Genome-fragment | NA              | 0     |       |
| 57_extracted_114246        | 13178  | NA  | 1     | 1  | Low-quality    | Genome-fragment | 7.89            | 0     |       |
| 515_vs_8977                | 13178  | NA  | 1     | 6  | Low-quality    | Genome-fragment | 18.76           | 0     |       |
| 58_vs_k141_186207          | 13180  | NA  | 4     | 0  | Low-quality    | Genome-fragment | 44.74           | 0     |       |
| 512_extracted_k141_39091   | 13181  | NA  | 0     | 5  | Low-quality    | Genome-fragment | 45.69           | 0     |       |
| 58_vs_k141_89178           | 13181  | Yes | 7376  | 3  | Low-quality    | Genome-fragment | 1.09            | 44.04 |       |
| 58_vs_k141_29236           | 4303   | NA  | 0     | 4  | Not-determined | Genome-fragment | NA              | 0     |       |
| 58_vs_k141_107211          | 1507   | NA  | 0     | 1  | Not-determined | Genome-fragment | NA              | 0     |       |
| 53_vs_k141_145420          | 13184  | NA  | 0     | 8  | Low-quality    | Genome-fragment | 18.77           | 0     |       |
| 58_vs_k141_176602          | 1629   | NA  | 0     | 1  | Not-determined | Genome-fragment | NA              | 0     |       |
| 58_vs_k141_17932           | 1139   | NA  | 0     | 0  | Not-determined | Genome-fragment | NA              | 0     |       |
| 58_vs_k141_98450           | 2157   | NA  | 0     | 1  | Not-determined | Genome-fragment | NA              | 0     |       |
| 55_vs_k141_123589          | 13188  | NA  | 1     | 2  | Low-quality    | Genome-fragment | 11.54           | 0     |       |
| 514_vs_k141_98593          | 13196  | NA  | 1     | 0  | Low-quality    | Genome-fragment | 27.02           | 0     |       |
| 58_vs_k141_20591           | 1030   | NA  | 1     | 1  | Not-determined | Genome-fragment | NA              | 0     |       |
| 58_vs_k141_158895          | 1159   | NA  | 0     | 0  | Not-determined | Genome-fragment | NA              | 0     |       |
| 58_vs_k141_176604          | 36150  | NA  | 19    | 1  | High-quality   | High-quality    | 100             | 0     |       |
| 58_vs_k141_46180           | 1945   | NA  | 0     | 0  | Not-determined | Genome-fragment | NA              | 0     |       |
| 512_vs_k141_155169         | 13205  | NA  | 0     | 1  | Low-quality    | Genome-fragment | 4.25            | 0     |       |
| 54_vs_VHSortier_20401-ca_2 | 13209  | NA  | 4     | 0  | Low-quality    | Genome-fragment | 44.3            | 0     |       |
| 58_vs_k141_176613          | 2909   | NA  | 0     | 3  | Not-determined | Genome-fragment | NA              | 0     |       |
| 58_vs_k141_167779          | 4999   | NA  | 0     | 4  | Not-determined | Genome-fragment | NA              | 0     |       |
| 58_vs_k141_107270          | 7449   | NA  | 0     | 1  | Not-determined | Genome-fragment | NA              | 0     |       |
| 511_vs_k141_23661          | 13210  | NA  | 7     | 1  | Low-quality    | Genome-fragment | 17.53           | 0     |       |
| 52_vs_k141_202625          | 13215  | Yes | 7705  | 2  | Low-quality    | Genome-fragment | 14.48           | 41.7  |       |
| 58_vs_k141_98513           | 1861   | NA  | 0     | 0  | Not-determined | Genome-fragment | NA              | 0     |       |
| 58_vs_k141_158910          | 7297   | NA  | 0     | 4  | Not-determined | Genome-fragment | NA              | 0     |       |
| 511_vs_k141_33988          | 13218  | NA  | 0     | 0  | Low-quality    | Genome-fragment | 30.77           | 0     |       |
| 55_vs_k141_67411           | 13226  | NA  | 8     | 1  | Low-quality    | Genome-fragment | 12.42           | 0     |       |
| 58_vs_k141_115829          | 1439   | NA  | 0     | 0  | Not-determined | Genome-fragment | NA              | 0     |       |
| 58_vs_k141_158913          | 2263   | NA  | 0     | 0  | Not-determined | Genome-fragment | NA              | 0     |       |
| 55_vs_k141_125013          | 13229  | NA  | 0     | 0  | Low-quality    | Genome-fragment | 35.42           | 0     |       |
| 53_vs_k141_84030           | 13231  | NA  | 4     | 0  | Low-quality    | Genome-fragment | 30.05           | 0     |       |
| 58_vs_k141_158924          | 2034   | NA  | 0     | 0  | Not-determined | Genome-fragment | NA              | 0     |       |
| 58_vs_k141_55185           | 1373   | NA  | 0     | 0  | Not-determined | Genome-fragment | NA              | 0     |       |
| 53_vs_k141_121685          | 13237  | NA  | 5     | 1  | Low-quality    | Genome-fragment | 33.8            | 0     |       |
| 516_extracted_130617       | 13237  | NA  | 6     | 0  | Low-quality    | Genome-fragment | 44.55           | 0     |       |
| 58_vs_k141_17972           | 2522   | NA  | 0     | 0  | Not-determined | Genome-fragment | NA              | 0     |       |
| 58_vs_k141_184663          | 2560   | NA  | 0     | 0  | Not-determined | Genome-fragment | NA              | 0     |       |
| 58_vs_k141_98546           | 3020   | NA  | 0     | 0  | Not-determined | Genome-fragment | NA              | 0     |       |
| 58_vs_k141_19339           | 1902   | NA  | 0     | 1  | Not-determined | Genome-fragment | NA              | 0     |       |
| 516_extracted_112846       | 13239  | NA  | 0     | 0  | Low-quality    | Genome-fragment | 28.87           | 0     |       |
| 58_vs_k141_55217           | 3847   | NA  | 0     | 1  | Not-determined | Genome-fragment | NA              | 0     |       |
| 58_vs_k141_29356           | 1220   | NA  | 0     | 1  | Not-determined | Genome-fragment | NA              | 0     |       |
| 58_vs_k141_107334          | 3020   | NA  | 0     | 2  | Not-determined | Genome-fragment | NA              | 0     |       |
| 58_vs_k141_71981           | 10449  | NA  | 0     | 1  | Not-determined | Genome-fragment | NA              | 0     |       |
| 55_vs_k141_62565           | 13240  | NA  | 3     | 0  | Low-quality    | Genome-fragment | 7.85            | 0     |       |
| 58_vs_k141_115350          | 2608   | NA  | 0     | 2  | Not-determined | Genome-fragment | NA              | 0     |       |
| 58_vs_k141_133191          | 1679   | NA  | 0     | 0  | Not-determined | Genome-fragment | NA              | 0     |       |
| 58_vs_k141_158951          | 3330   | NA  | 0     | 0  | Not-determined | Genome-fragment | NA              | 0     |       |
| 58_vs_k141_115896          | 2911   | NA  | 0     | 3  | Not-determined | Genome-fragment | NA              | 0     |       |
| 53_vs_k141_63671           | 13251  | NA  | 12    | 0  | Low-quality    | Genome-fragment | 25.15           | 0     |       |
| 58_vs_k141_37932           | 1283   | NA  | 0     | 2  | Not-determined | Genome-fragment | NA              | 0     |       |
| 58_vs_k141_167854          | 1518   | NA  | 0     | 0  | Not-determined | Genome-fragment | NA              | 0     |       |
| 58_vs_k141_107342          | 2352   | NA  | 0     | 0  | Not-determined | Genome-fragment | NA              | 0     |       |
| 515_vs_35733               | 13252  | NA  | 0     | 1  | Low-quality    | Genome-fragment | 12.9            | 0     |       |
| 56_vs_k141_14331           | 13254  | NA  | 2     | 1  | Low-quality    | Genome-fragment | 12.87           | 0     |       |
| 514_vs_k141_88188          | 13260  | NA  | 3     | 1  | Low-quality    | Genome-fragment | 22.29           | 0     |       |
| 58_vs_k141_63888           | 3697   | NA  | 0     | 1  | Not-determined | Genome-fragment | NA              | 0     |       |
| 517_extracted_k141_35476   | 13261  | NA  | 4     | 0  | Low-quality    | Genome-fragment | 37.05           | 0     |       |
| 58_vs_k141_194186          | 2393   | NA  | 0     | 1  | Not-determined | Genome-fragment | NA              | 0     |       |
| 58_vs_k141_150484          | 1770   | NA  | 0     | 1  | Not-determined | Genome-fragment | NA              | 0     |       |
| 517_vs_k141_122103         | 13261  | NA  | 3     | 0  | Low-quality    | Genome-fragment | 19.41           | 0     |       |
| 58_vs_k141_107373          | 2693   | NA  | 0     | 1  | Not-determined | Genome-fragment | NA              | 0     |       |
| 512_extracted_k141_111822  | 13261  | NA  | 0     | 0  | Low-quality    | Genome-fragment | 44.63           | 0     |       |
| 57_vs_21301                | 13274  | NA  | 4     | 0  | Low-quality    | Genome-fragment | 15.58           | 0     |       |
| 58_vs_k141_159007          | 2189   | NA  | 0     | 3  | Not-determined | Genome-fragment | NA              | 0     |       |
| 56_vs_k141_43120           | 13280  | NA  | 0     | 4  | Low-quality    | Genome-fragment | 15.14           | 0     |       |
| 58_vs_k141_194213          | 1456   | NA  | 0     | 0  | Not-determined | Genome-fragment | NA              | 0     |       |
| 58_vs_k141_115946          | 3894   | NA  | 0     | 2  | Not-determined | Genome-fragment | NA              | 0     |       |
| 57_vs_93022                | 13281  | NA  | 8     | 0  | Low-quality    | Genome-fragment | 44.24           | 0     |       |
| 58_vs_k141_20567           | 1556   | NA  | 8     | 2  | Not-determined | Genome-fragment | NA              | 0     |       |
| 58_vs_k141_29476           | 2700   | NA  | 0     | 2  | Not-determined | Genome-fragment | NA              | 0     |       |
| 58_vs_k141_176720          | 2214   | NA  | 14    | 0  | Medium-quality | Genome-fragment | 60.95           | 0     |       |
| 52_vs_k141_1101            | 13281  | NA  | 7     | 0  | Low-quality    | Genome-fragment | 41.69           | 0     |       |
| 55_extracted_k141_8532     | 13293  | NA  | 4     | 0  | Low-quality    | Genome-fragment | 44.58           | 0     |       |
| 58_vs_k141_3218            | 5732   | NA  | 0     | 3  | Not-determined | Genome-fragment | NA              | 0     |       |
| 58_vs_k141_29492           | 7794   | NA  | 0     | 2  | Not-determined | Genome-fragment | NA              | 0     |       |
| 512_extracted_k141_10968   | 13295  | NA  | 0     | 0  | Low-quality    | Genome-fragment | 7.43            | 0     |       |
| 54_extracted_18555         | 13297  | NA  | 15    | 0  | Low-quality    | Genome-fragment | 38.47           | 0     |       |
| 53_vs_k141_184810          | 13304  | Yes | 10999 | 3  | 2              | Low-quality     | Genome-fragment | 14.6  | 17.33 |
| 53_extracted_k141_18959    | 1802   | NA  | 0     | 1  | Not-determined | Genome-fragment | NA              | 0     |       |
| 58_vs_k141_194246          | 13312  | NA  | 4     | 1  | Low-quality    | Genome-fragment | 15.38           | 0     |       |
| 58_vs_k141_18081           | 6133   | NA  | 0     | 3  | Not-determined | Genome-fragment | NA              | 0     |       |
| 58_vs_k141_202576          | 2561   | NA  | 0     | 0  | Not-determined | Genome-fragment | NA              | 0     |       |
| 58_vs_k141_55354           | 3546   | NA  | 0     | 2  | Not-determined | Genome-fragment | NA              | 0     |       |
| 515_extracted_50579        | 13319  | NA  | 1     | 0  | Low-quality    | Genome-fragment | 14.5            | 0     |       |
| 58_vs_k141_202487          | 1102   | NA  | 0     | 1  | Not-determined | Genome-fragment | NA              | 0     |       |
| 58_vs_k141_187780          | 13318  | NA  | 0     | 1  | Low-quality    | Genome-fragment | 22.45           | 0     |       |
| 58_vs_k141_142097          | 15982  | NA  | 7     | 0  | Medium-quality | Genome-fragment | 74.41           | 0     |       |
| 514_vs_k141_20384          | 13343  | NA  | 8     | 0  | Low-quality    | Genome-fragment | 36.04           | 0     |       |
| 58_vs_k141_12241           | 11252  | NA  | 24    | 1  | High-quality   | High-quality    | 95.53           | 0     |       |
| 58_vs_k141_20642           | 2076   | NA  | 0     | 0  | Not-determined | Genome-fragment | NA              | 0     |       |
| 58_vs_k141_19531           | 2539   | NA  | 0     | 0  | Not-determined | Genome-fragment | NA              | 0     |       |
| 512_extracted_k141_124441  | 13344  | NA  | 0     | 0  | Low-quality    | Genome-fragment | 44.63           | 0     |       |
| 58_vs_k141_194276          | 2808   | NA  | 0     | 2  | Not-determined | Genome-fragment | NA              | 0     |       |
| 53_vs_k141_88778           | 13352  | NA  | 6     | 0  | Low-quality    | Genome-fragment | 44.94           | 0     |       |
| 58_vs_k141_46371           | 2369   | NA  | 0     | 0  | Not-determined | Genome-fragment | NA              | 0     |       |
| 58_vs_k141_202576          | 1193   | NA  | 0     | 1  | Not-determined | Genome-fragment | NA              | 0     |       |
| 58_vs_k141_168091          | 1807   | NA  | 0     | 1  | Not-determined | Genome-fragment | NA              | 0     |       |
| 58_vs_k141_114031          | 2682   | NA  | 0     | 2  | Not-determined | Genome-fragment | NA              | 0     |       |
| 58_vs_k141_159165          | 1803   | NA  | 0     | 3  | Not-determined | Genome-fragment | NA              | 0     |       |
| 58_vs_k141_20661           | 1088   | NA  | 0     | 3  | Not-determined | Genome-fragment | NA              | 0     |       |
| 513_extracted_153039       | 13360  | NA  | 5     | 0  | Low-quality    | Genome-fragment | 22.09           | 0     |       |
| 59_extracted_k141_70111    | 13363  | NA  | 3     | 0  | Low-quality    | Genome-fragment | 41.32           | 0     |       |
| 58_vs_k141_142143          | 1164   | NA  | 0     | 0  | Not-determined | Genome-fragment | NA              | 0     |       |
| 510_vs_52220               | 13365  | NA  | 1     | 3  | Low-quality    | Genome-fragment | 8.98            | 0     |       |
| 58_vs_k141_20670           | 2760   | NA  | 0     | 1  | Not-determined | Genome-fragment | NA              | 0     |       |
| 511_extracted_k141_83592   | 13367  | NA  | 1     | 0  | Low-quality    | Genome-fragment | 11.19           | 0     |       |
| 58_vs_k141_107521          | 1030   | NA  | 0     | 0  | Not-determined | Genome-fragment | NA              | 0     |       |
| 58_vs_k141_194220          | 1265   | NA  | 0     | 0  | Not-determined | Genome-fragment | NA              | 0     |       |
| 58_vs_k141_107535          | 1363   | NA  | 0     | 1  | Not-determined | Genome-fragment | NA              | 0     |       |
| 511_vs_k141_101873         | 13370  | NA  | 2     | 0  | Low-quality    | Genome-fragment | 31.2            | 0     |       |
| 58_vs_k141_133309          | 1500   | NA  | 0     | 0  | Not-determined | Genome-fragment | NA              | 0     |       |
| 58_vs_k141_159177          | 6338   | NA  | 0     | 1  | Not-determined | Genome-fragment | NA              | 0     |       |
| 58_extracted_k141_36604    | 13372  | NA  | 9     | 1  | Low-quality    | Genome-fragment | 20.62           | 0     |       |
| 58_vs_k141_115958          | 137050 | Yes | 57290 | 27 | 50             | High-quality    | High-quality    | 100   | 58.2  |
| 58_vs_k141_159191          | 2737   | NA  | 0     | 0  | Not-determined | Genome-fragment | NA              | 0     |       |
| 55_vs_k141_38139           | 13373  | Yes | 7481  | 1  | 4              | Low-quality     | Genome-fragment | 4.06  | 44.06 |
| 58_vs_k141_20720           | 1404   | NA  | 0     | 1  | Not-determined | Genome-fragment | NA              | 0     |       |
| 56_vs_k141_14484           | 13385  | NA  | 1     | 2  | Low-quality    | Genome-fragment | 35.55           | 0     |       |
| 58_vs_k141_28608           | 1275   | NA  | 0     |    |                |                 |                 |       |       |



|                             |       |     |    |       |    |    |                |                 |    |       |       |
|-----------------------------|-------|-----|----|-------|----|----|----------------|-----------------|----|-------|-------|
| 58_vs_k141_55487 full       | 3965  | No  | NA | 6080  | 0  | 2  | Not-determined | Genome-fragment | NA | 0     |       |
| 57_vs_k141_1802 full        | 13522 | Yes |    |       | 3  | 1  | Low-quality    | Genome-fragment | NA | 13.28 | 55.04 |
| 51_vs_k141_135923 full      | 13523 | No  | NA |       | 2  | 0  | Low-quality    | Genome-fragment | NA | 32.28 | 0     |
| 512_vs_k141_92520 0_partial | 13534 | No  | NA |       | 1  | 6  | Low-quality    | Genome-fragment | NA | 17.72 | 0     |
| 58_vs_k141_90154 full       | 2024  | No  | NA |       | 0  | 1  | Not-determined | Genome-fragment | NA | 0     | 0     |
| 57_vs_24188 full            | 13539 | No  | NA |       | 3  | 0  | Low-quality    | Genome-fragment | NA | 37.45 | 0     |
| 54_extracted_1816           | 13564 | No  | NA |       | 2  | 1  | Low-quality    | Genome-fragment | NA | 30.24 | 0     |
| 58_vs_k141_176986 full      | 1097  | No  | NA |       | 0  | 1  | Not-determined | Genome-fragment | NA | 0     | 0     |
| 516_vs_13480 full           | 13570 | No  | NA |       | 1  | 1  | Low-quality    | Genome-fragment | NA | 30.83 | 0     |
| 58_vs_k141_194483 full      | 2697  | No  | NA |       | 0  | 0  | Not-determined | Genome-fragment | NA | 0     | 0     |
| 58_vs_k141_14721 full       | 4017  | No  | NA |       | 0  | 3  | Not-determined | Genome-fragment | NA | 0     | 0     |
| 59_extracted_k141_56383     | 13573 | No  | NA |       | 7  | 1  | Low-quality    | Genome-fragment | NA | 21.74 | 0     |
| 55_extracted_k141_141608    | 13583 | No  | NA |       | 15 | 0  | Low-quality    | Genome-fragment | NA | 35.87 | 0     |
| 511_vs_k141_26997 full      | 13586 | No  | NA |       | 8  | 0  | Low-quality    | Genome-fragment | NA | 35.48 | 0     |
| 516_extracted_162641        | 13597 | No  | NA |       | 10 | 0  | Low-quality    | Genome-fragment | NA | 34.61 | 0     |
| 58_vs_k141_11821 full       | 1752  | No  | NA |       | 0  | 1  | Not-determined | Genome-fragment | NA | 0     | 0     |
| 58_vs_k141_172919 full      | 13611 | No  | NA |       | 5  | 0  | Low-quality    | Genome-fragment | NA | 22.78 | 0     |
| 59_extracted_k141_17784     | 13617 | No  | NA |       | 11 | 0  | Low-quality    | Genome-fragment | NA | 19.55 | 0     |
| 58_vs_k141_185041 full      | 49942 | No  | NA |       | 22 | 2  | High-quality   | Genome-fragment | NA | 100   | 0     |
| 512_vs_k141_47409 full      | 13626 | No  | NA |       | 0  | 1  | Low-quality    | Genome-fragment | NA | 21.08 | 0     |
| 51_extracted_k141_155233    | 13627 | No  | NA |       | 6  | 0  | Low-quality    | Genome-fragment | NA | 16.95 | 0     |
| 58_vs_k141_177029 full      | 1316  | No  | NA |       | 0  | 0  | Not-determined | Genome-fragment | NA | 0     | 0     |
| 58_vs_k141_194532 full      | 2998  | No  | NA |       | 0  | 2  | Not-determined | Genome-fragment | NA | 0     | 0     |
| 58_vs_k141_107727 full      | 2672  | No  | NA |       | 0  | 3  | Not-determined | Genome-fragment | NA | 0     | 0     |
| 514_vs_k141_59982 full      | 13628 | No  | NA |       | 13 | 0  | Low-quality    | Genome-fragment | NA | 33.09 | 0     |
| 58_vs_k141_194537 full      | 1622  | No  | NA |       | 0  | 0  | Not-determined | Genome-fragment | NA | 0     | 0     |
| 53_vs_k141_13143 full       | 13648 | No  | NA |       | 5  | 1  | Low-quality    | Genome-fragment | NA | 34.49 | 0     |
| 58_vs_k141_11634 full       | 3857  | No  | NA |       | 0  | 2  | Not-determined | Genome-fragment | NA | 0     | 0     |
| 510_vs_75439 full           | 13657 | No  | NA |       | 3  | 1  | Low-quality    | Genome-fragment | NA | 13.76 | 0     |
| 58_vs_k141_72393 full       | 1281  | No  | NA |       | 0  | 0  | Not-determined | Genome-fragment | NA | 0     | 0     |
| 58_vs_k141_168282 full      | 1609  | No  | NA |       | 0  | 0  | Not-determined | Genome-fragment | NA | 0     | 0     |
| 58_vs_k141_102894 full      | 3490  | No  | NA |       | 0  | 3  | Not-determined | Genome-fragment | NA | 0     | 0     |
| 58_vs_k141_150733 full      | 3276  | No  | NA |       | 0  | 0  | Not-determined | Genome-fragment | NA | 0     | 0     |
| 58_vs_k141_150734 full      | 1063  | No  | NA |       | 0  | 1  | Not-determined | Genome-fragment | NA | 0     | 0     |
| 55_vs_k141_117930 full      | 13665 | No  | NA |       | 1  | 5  | Low-quality    | Genome-fragment | NA | 8.84  | 0     |
| 516_extracted_15831         | 13670 | No  | NA |       | 0  | 2  | Low-quality    | Genome-fragment | NA | 8.69  | 0     |
| 58_vs_k141_168306 full      | 2493  | No  | NA |       | 0  | 0  | Not-determined | Genome-fragment | NA | 0     | 0     |
| 55_vs_k141_144953 full      | 13673 | No  | NA |       | 10 | 0  | Low-quality    | Genome-fragment | NA | 23.94 | 0     |
| 59_vs_k141_1731 full        | 13686 | No  | NA |       | 5  | 1  | Low-quality    | Genome-fragment | NA | 29.88 | 0     |
| 58_vs_k141_150756 full      | 1869  | No  | NA |       | 0  | 0  | Not-determined | Genome-fragment | NA | 0     | 0     |
| 516_vs_152902 full          | 13687 | No  | NA |       | 1  | 4  | Low-quality    | Genome-fragment | NA | 12.65 | 0     |
| 58_vs_k141_194604 full      | 1418  | No  | NA |       | 1  | 1  | Not-determined | Genome-fragment | NA | 0     | 0     |
| 58_vs_k141_72428 full       | 2278  | No  | NA |       | 0  | 1  | Not-determined | Genome-fragment | NA | 0     | 0     |
| 58_vs_k141_11854 full       | 1874  | No  | NA |       | 0  | 1  | Not-determined | Genome-fragment | NA | 0     | 0     |
| 58_vs_k141_150760 full      | 1637  | No  | NA |       | 0  | 1  | Not-determined | Genome-fragment | NA | 0     | 0     |
| 511_extracted_k141_89242    | 13690 | No  | NA |       | 0  | 0  | Low-quality    | Genome-fragment | NA | 14.74 | 0     |
| 58_vs_k141_90248 full       | 1645  | No  | NA |       | 0  | 0  | Not-determined | Genome-fragment | NA | 0     | 0     |
| 516_extracted_11051         | 13704 | No  | NA |       | 9  | 0  | Low-quality    | Genome-fragment | NA | 35.51 | 0     |
| 517_vs_k141_64619 0_partial | 13707 | Yes |    | 2208  | 10 | 10 | Low-quality    | Genome-fragment | NA | 33.39 | 83.89 |
| 58_vs_k141_29871 full       | 2481  | No  | NA |       | 0  | 1  | Not-determined | Genome-fragment | NA | 0     | 0     |
| 58_vs_k141_90264 full       | 2585  | No  | NA |       | 0  | 2  | Not-determined | Genome-fragment | NA | 0     | 0     |
| 58_vs_k141_156559 full      | 8251  | No  | NA |       | 0  | 4  | Not-determined | Genome-fragment | NA | 0     | 0     |
| 58_vs_k141_150783 full      | 1745  | No  | NA |       | 0  | 2  | Not-determined | Genome-fragment | NA | 0     | 0     |
| 58_vs_k141_150788 full      | 5042  | No  | NA |       | 0  | 2  | Not-determined | Genome-fragment | NA | 0     | 0     |
| 53_extracted_k141_26533     | 13713 | No  | NA |       | 2  | 0  | Low-quality    | Genome-fragment | NA | 35.27 | 0     |
| 58_vs_k141_11697 full       | 1847  | No  | NA |       | 0  | 0  | Not-determined | Genome-fragment | NA | 0     | 0     |
| 58_vs_k141_72471 full       | 1745  | No  | NA |       | 0  | 1  | Not-determined | Genome-fragment | NA | 0     | 0     |
| 510_extracted_105406        | 13714 | No  | NA |       | 0  | 3  | Low-quality    | Genome-fragment | NA | 13.81 | 0     |
| 512_extracted_k141_40819    | 13756 | No  | NA |       | 0  | 1  | Low-quality    | Genome-fragment | NA | 7.46  | 0     |
| 516_vs_163744 full          | 13759 | No  | NA |       | 9  | 0  | Low-quality    | Genome-fragment | NA | 22.12 | 0     |
| 58_vs_k141_99025 full       | 1781  | No  | NA |       | 0  | 0  | Not-determined | Genome-fragment | NA | 0     | 0     |
| 58_vs_k141_102785 full      | 8354  | No  | NA |       | 0  | 4  | Not-determined | Genome-fragment | NA | 0     | 0     |
| 516_vs_8659 full            | 13776 | Yes |    | 2481  | 4  | 6  | Low-quality    | Genome-fragment | NA | 3.9   | 81.99 |
| 517_extracted_k141_100949   | 13778 | No  | NA |       | 4  | 1  | Low-quality    | Genome-fragment | NA | 21.2  | 0     |
| 58_vs_k141_185161 full      | 1981  | No  | NA |       | 0  | 2  | Not-determined | Genome-fragment | NA | 0     | 0     |
| 58_vs_k141_194655 full      | 1087  | No  | NA |       | 0  | 0  | Not-determined | Genome-fragment | NA | 0     | 0     |
| 58_vs_k141_72508 full       | 6480  | No  | NA |       | 0  | 1  | Not-determined | Genome-fragment | NA | 0     | 0     |
| 55_vs_k141_16922 full       | 13788 | No  | NA |       | 4  | 0  | Low-quality    | Genome-fragment | NA | 25.32 | 0     |
| 518_vs_42786 0_partial      | 13792 | No  | NA |       | 0  | 1  | Low-quality    | Genome-fragment | NA | 26.76 | 0     |
| 58_vs_k141_168416 full      | 1167  | No  | NA |       | 0  | 1  | Not-determined | Genome-fragment | NA | 0     | 0     |
| 510_extracted_62694         | 13794 | No  | NA |       | 0  | 9  | Low-quality    | Genome-fragment | NA | 5.11  | 0     |
| 58_vs_k141_159570 full      | 1154  | No  | NA |       | 0  | 2  | Not-determined | Genome-fragment | NA | 0     | 0     |
| 53_vs_k141_22738 full       | 13799 | No  | NA |       | 7  | 0  | Low-quality    | Genome-fragment | NA | 30.13 | 0     |
| 58_vs_k141_29958 full       | 1271  | No  | NA |       | 0  | 0  | Not-determined | Genome-fragment | NA | 0     | 0     |
| 511_extracted_k141_102808   | 13802 | No  | NA |       | 0  | 1  | Low-quality    | Genome-fragment | NA | 15.18 | 0     |
| 58_vs_k141_159590 full      | 3447  | No  | NA |       | 0  | 3  | Not-determined | Genome-fragment | NA | 0     | 0     |
| 58_vs_k141_99090 full       | 2329  | No  | NA |       | 0  | 2  | Not-determined | Genome-fragment | NA | 0     | 0     |
| 510_extracted_101856        | 13804 | No  | NA |       | 17 | 0  | Low-quality    | Genome-fragment | NA | 30.49 | 0     |
| 512_vs_k141_142347 full     | 13809 | No  | NA |       | 3  | 0  | Low-quality    | Genome-fragment | NA | 18.84 | 0     |
| 53_vs_k141_82496 0_partial  | 13845 | Yes |    | 8344  | 2  | 2  | Low-quality    | Genome-fragment | NA | 8.86  | 39.73 |
| 511_vs_k141_13930 full      | 13846 | No  | NA |       | 4  | 0  | Low-quality    | Genome-fragment | NA | 8.49  | 0     |
| 53_extracted_k141_49333     | 13846 | No  | NA |       | 3  | 0  | Low-quality    | Genome-fragment | NA | 45.06 | 0     |
| 512_extracted_k141_63253    | 13856 | No  | NA |       | 2  | 0  | Low-quality    | Genome-fragment | NA | 29.22 | 0     |
| 58_vs_k141_177178 full      | 7366  | No  | NA |       | 0  | 2  | Not-determined | Genome-fragment | NA | 0     | 0     |
| 58_vs_k141_168475 full      | 3332  | No  | NA |       | 0  | 0  | Not-determined | Genome-fragment | NA | 0     | 0     |
| 58_vs_k141_125276 full      | 1295  | No  | NA |       | 0  | 0  | Not-determined | Genome-fragment | NA | 0     | 0     |
| 58_vs_k141_202882 full      | 1303  | No  | NA |       | 0  | 0  | Not-determined | Genome-fragment | NA | 0     | 0     |
| 55_vs_k141_99710 full       | 13861 | No  | NA |       | 8  | 0  | Low-quality    | Genome-fragment | NA | 34.02 | 0     |
| 53_vs_k141_4121 full        | 13871 | No  | NA |       | 0  | 0  | Low-quality    | Genome-fragment | NA | 6.4   | 0     |
| 58_vs_k141_142547 full      | 2035  | No  | NA |       | 0  | 0  | Not-determined | Genome-fragment | NA | 0     | 0     |
| 58_extracted_k141_205123    | 13885 | No  | NA |       | 5  | 0  | Low-quality    | Genome-fragment | NA | 21.92 | 0     |
| 516_extracted_116545        | 13895 | No  | NA |       | 0  | 1  | Low-quality    | Genome-fragment | NA | 23.2  | 0     |
| 58_vs_k141_3811 full        | 2095  | No  | NA |       | 0  | 0  | Not-determined | Genome-fragment | NA | 0     | 0     |
| 58_vs_k141_99175 full       | 7926  | No  | NA |       | 0  | 5  | Not-determined | Genome-fragment | NA | 0     | 0     |
| 511_extracted_k141_96919    | 13897 | No  | NA |       | 1  | 1  | Low-quality    | Genome-fragment | NA | 43.84 | 0     |
| 57_vs_121493 full           | 13900 | No  | NA |       | 10 | 0  | Low-quality    | Genome-fragment | NA | 28.33 | 0     |
| 58_vs_k141_30117 full       | 3058  | No  | NA |       | 0  | 2  | Not-determined | Genome-fragment | NA | 0     | 0     |
| 58_vs_k141_168580 full      | 1346  | No  | NA |       | 0  | 0  | Not-determined | Genome-fragment | NA | 0     | 0     |
| 58_vs_k141_108034 full      | 1047  | No  | NA |       | 0  | 1  | Not-determined | Genome-fragment | NA | 0     | 0     |
| 58_vs_k141_168581 full      | 1299  | No  | NA |       | 0  | 1  | Not-determined | Genome-fragment | NA | 0     | 0     |
| 58_vs_k141_168584 full      | 2327  | No  | NA |       | 0  | 2  | Not-determined | Genome-fragment | NA | 0     | 0     |
| 58_vs_k141_211401 full      | 6415  | No  | NA |       | 0  | 2  | Not-determined | Genome-fragment | NA | 0     | 0     |
| 512_extracted_k141_185384   | 13910 | No  | NA |       | 5  | 0  | Low-quality    | Genome-fragment | NA | 43.87 | 0     |
| 55_extracted_k141_115986    | 13919 | No  | NA |       | 12 | 0  | Low-quality    | Genome-fragment | NA | 37.12 | 0     |
| 58_vs_k141_99243 full       | 3619  | No  | NA |       | 0  | 0  | Not-determined | Genome-fragment | NA | 0     | 0     |
| 53_vs_k141_88927 full       | 13937 | No  | NA |       | 0  | 1  | Low-quality    | Genome-fragment | NA | 32.54 | 0     |
| 510_vs_27783 full           | 13953 | No  | NA |       | 15 | 0  | Low-quality    | Genome-fragment | NA | 39.66 | 0     |
| 58_vs_k141_15927 full       | 2252  | No  | NA |       | 0  | 0  | Not-determined | Genome-fragment | NA | 0     | 0     |
| 53_vs_k141_15609 full       | 13958 | No  | NA |       | 0  | 0  | Low-quality    | Genome-fragment | NA | 36.55 | 0     |
| 58_vs_k141_196354 full      | 13958 | No  | NA |       | 7  | 0  | Low-quality    | Genome-fragment | NA | 44.57 | 0     |
| 514_vs_k141_63500 full      | 13960 | No  | NA |       | 3  | 0  | Low-quality    | Genome-fragment | NA | 9.06  | 0     |
| 58_vs_k141_12011 full       | 3657  | No  | NA |       | 1  | 0  | Not-determined | Genome-fragment | NA | 0     | 0     |
| 58_vs_k141_133710 full      | 4256  | No  | NA |       | 0  | 3  | Not-determined | Genome-fragment | NA | 0     | 0     |
| 58_vs_k141_151041 full      | 6997  | No  | NA |       | 0  | 2  | Not-determined | Genome-fragment | NA | 0     | 0     |
| 58_vs_k141_90538 full       | 2539  | No  | NA |       | 1  | 1  | Not-determined | Genome-fragment | NA | 0     | 0     |
| 513_extracted_98473         | 13978 | No  | NA |       | 5  | 0  | Low-quality    | Genome-fragment | NA | 12.82 | 0     |
| 58_vs_k141_110039 full      | 13997 | No  | NA |       | 11 | 0  | Low-quality    | Genome-fragment | NA | 23.76 | 0     |
| 514_extracted_k141_101406   | 14000 | No  | NA |       | 0  | 2  | Low-quality    | Genome-fragment | NA | 24.06 | 0     |
| 58_vs_k141_50532 full       | 1500  | No  | NA |       | 0  | 1  | Not-determined | Genome-fragment | NA | 0     | 0     |
| 511_vs_k141_46646 full      | 14012 | No  | NA |       | 2  | 0  | Low-quality    | Genome-fragment | NA | 25.01 | 0     |
| 55_vs_k141_1211063 full     | 2473  | No  | NA |       | 0  | 0  | Not-determined | Genome-fragment | NA | 0     | 0     |
| 55_vs_k141_121196 full      | 14019 | Yes |    | 11778 | 1  | 1  | Low-quality    | Genome-fragment | NA | 22.1  | 15.99 |
| 57_extracted_110206         | 14019 | No  | NA |       | 2  | 0  | Low-quality    | Genome-fragment | NA | 21.81 | 0     |
| 58_vs_k141_159697 full      | 2299  | No  | NA |       | 0  | 2  | Not-determined | Genome-fragment | NA | 0     | 0     |
| 58_vs_k141_102241 full      | 1154  | No  | NA |       | 0  | 2  | Not-determined | Genome-fragment | NA | 0     | 0     |
| 58_vs_k141_185324 full      | 1145  | No  | NA |       | 0  | 0  | Not-determined | Genome-fragment | NA |       |       |



|                          |             |       |     |       |    |    |                |                 |    |       |       |
|--------------------------|-------------|-------|-----|-------|----|----|----------------|-----------------|----|-------|-------|
| 511_vs_k141_51567        | [full]      | 14214 | Yes | 7639  | 6  | 6  | Low-quality    | Genome-fragment | NA | 42.97 | 46.26 |
| 58_vs_k141_108232        | [full]      | 14210 | No  | NA    | 0  | 0  | Not-determined | Genome-fragment | NA | 0     | 0     |
| 58_vs_k141_38652         | [full]      | 1989  | No  | NA    | 0  | 0  | Not-determined | Genome-fragment | NA | 0     | 0     |
| 58_vs_k141_142902        | [full]      | 1968  | No  | NA    | 0  | 0  | Not-determined | Genome-fragment | NA | 0     | 0     |
| 58_vs_k141_21342         | [full]      | 4179  | No  | NA    | 0  | 3  | Not-determined | Genome-fragment | NA | 0     | 0     |
| 510_extracted_23637      | [full]      | 14223 | No  | NA    | 4  | 0  | Low-quality    | Genome-fragment | NA | 31.42 | 0     |
| 53_vs_k141_65537         | [0_partial] | 14233 | No  | NA    | 1  | 5  | Low-quality    | Genome-fragment | NA | 23.07 | 0     |
| 513_vs_118409            | [full]      | 14240 | No  | NA    | 9  | 0  | Low-quality    | Genome-fragment | NA | 36.88 | 0     |
| 511_extracted_k141_36253 | [full]      | 14249 | No  | NA    | 2  | 0  | Low-quality    | Genome-fragment | NA | 24.59 | 0     |
| 514_extracted_k141_85172 | [full]      | 14270 | No  | NA    | 3  | 0  | Low-quality    | Genome-fragment | NA | 27.4  | 0     |
| 512_vs_k141_25107        | [full]      | 14295 | No  | NA    | 6  | 0  | Low-quality    | Genome-fragment | NA | 23.74 | 0     |
| 58_vs_k141_28678         | [full]      | 1738  | No  | NA    | 0  | 2  | Not-determined | Genome-fragment | NA | 0     | 0     |
| 58_vs_k141_203221        | [full]      | 8577  | No  | NA    | 0  | 3  | Not-determined | Genome-fragment | NA | 0     | 0     |
| 58_vs_k141_38680         | [full]      | 3391  | No  | NA    | 0  | 0  | Not-determined | Genome-fragment | NA | 0     | 0     |
| 58_vs_k141_168828        | [full]      | 1643  | No  | NA    | 0  | 1  | Not-determined | Genome-fragment | NA | 0     | 0     |
| 58_vs_k141_108305        | [full]      | 1557  | No  | NA    | 1  | 0  | Not-determined | Genome-fragment | NA | 0     | 0     |
| 513_vs_34117             | [full]      | 14299 | Yes | 11559 | 4  | 3  | Low-quality    | Genome-fragment | NA | 24.43 | 19.16 |
| 58_vs_k141_185512        | [full]      | 3443  | No  | NA    | 0  | 1  | Not-determined | Genome-fragment | NA | 18.28 | 0     |
| 514_vs_k141_1668         | [full]      | 14300 | No  | NA    | 4  | 1  | Low-quality    | Genome-fragment | NA | 0     | 0     |
| 58_vs_k141_195081        | [full]      | 1094  | No  | NA    | 0  | 0  | Not-determined | Genome-fragment | NA | 0     | 0     |
| 58_vs_k141_116674        | [full]      | 2460  | No  | NA    | 0  | 0  | Not-determined | Genome-fragment | NA | 0     | 0     |
| 514_vs_k141_6877         | [full]      | 14349 | No  | NA    | 3  | 0  | Low-quality    | Genome-fragment | NA | 34.89 | 0     |
| 517_vs_k141_83117        | [0_partial] | 14386 | No  | NA    | 1  | 6  | Low-quality    | Genome-fragment | NA | 8.86  | 0     |
| 58_vs_k141_64523         | [full]      | 1494  | No  | NA    | 0  | 0  | Not-determined | Genome-fragment | NA | 0     | 0     |
| 58_vs_k141_47053         | [full]      | 6061  | No  | NA    | 0  | 1  | Not-determined | Genome-fragment | NA | 31.36 | 0     |
| 52_vs_k141_1334          | [full]      | 14388 | No  | NA    | 0  | 2  | Low-quality    | Genome-fragment | NA | 8.72  | 0     |
| 58_extracted_k141_203092 | [full]      | 14409 | No  | NA    | 3  | 2  | Low-quality    | Genome-fragment | NA | 0     | 0     |
| 58_vs_k141_203269        | [full]      | 1636  | No  | NA    | 0  | 0  | Not-determined | Genome-fragment | NA | 35.84 | 0     |
| 54_extracted_29443       | [full]      | 14414 | No  | NA    | 14 | 0  | Low-quality    | Genome-fragment | NA | 32.68 | 0     |
| 53_vs_k141_92014         | [full]      | 14416 | No  | NA    | 6  | 0  | Low-quality    | Genome-fragment | NA | 0     | 0     |
| 58_vs_k141_125704        | [full]      | 1615  | No  | NA    | 0  | 3  | Not-determined | Genome-fragment | NA | 0     | 0     |
| 58_vs_k141_185536        | [full]      | 4392  | No  | NA    | 1  | 0  | Not-determined | Genome-fragment | NA | 0     | 0     |
| 58_vs_k141_108324        | [full]      | 2261  | No  | NA    | 0  | 0  | Not-determined | Genome-fragment | NA | 0     | 0     |
| 58_vs_k141_168874        | [full]      | 4982  | No  | NA    | 0  | 4  | Not-determined | Genome-fragment | NA | 0     | 0     |
| 58_vs_k141_185547        | [full]      | 2026  | No  | NA    | 0  | 2  | Not-determined | Genome-fragment | NA | 0     | 0     |
| 58_vs_k141_10542         | [full]      | 3409  | No  | NA    | 1  | 0  | Not-determined | Genome-fragment | NA | 0     | 0     |
| 58_vs_k141_195108        | [full]      | 1223  | No  | NA    | 0  | 1  | Not-determined | Genome-fragment | NA | 0     | 0     |
| 54_extracted_26861       | [full]      | 14437 | No  | NA    | 4  | 1  | Low-quality    | Genome-fragment | NA | 35.68 | 0     |
| 512_vs_k141_104347       | [0_partial] | 14438 | Yes | 10762 | 1  | 0  | Low-quality    | Genome-fragment | NA | 25.46 | 0     |
| 58_vs_k141_64549         | [full]      | 6394  | No  | NA    | 2  | 0  | Not-determined | Genome-fragment | NA | 0     | 0     |
| 59_vs_k141_26819         | [full]      | 14462 | No  | NA    | 10 | 0  | Low-quality    | Genome-fragment | NA | 33.24 | 0     |
| 58_vs_k141_168808        | [full]      | 1296  | No  | NA    | 0  | 1  | Not-determined | Genome-fragment | NA | 13.07 | 0     |
| 516_extracted_91410      | [full]      | 14465 | No  | NA    | 1  | 0  | Low-quality    | Genome-fragment | NA | 13.05 | 0     |
| 58_vs_k141_99604         | [full]      | 2418  | No  | NA    | 0  | 0  | Not-determined | Genome-fragment | NA | 0     | 0     |
| 57_vs_24186              | [full]      | 14477 | No  | NA    | 1  | 0  | Low-quality    | Genome-fragment | NA | 22.2  | 0     |
| 517_vs_k141_80008        | [full]      | 14478 | No  | NA    | 5  | 1  | Low-quality    | Genome-fragment | NA | 18.38 | 0     |
| 58_vs_k141_56282         | [full]      | 1023  | No  | NA    | 0  | 1  | Not-determined | Genome-fragment | NA | 0     | 0     |
| 58_vs_k141_56283         | [full]      | 1085  | No  | NA    | 0  | 0  | Not-determined | Genome-fragment | NA | 0     | 0     |
| 58_vs_k141_177750        | [full]      | 3210  | No  | NA    | 0  | 3  | Not-determined | Genome-fragment | NA | 0     | 0     |
| 58_vs_k141_12447         | [full]      | 2912  | No  | NA    | 0  | 0  | Not-determined | Genome-fragment | NA | 0     | 0     |
| 58_vs_k141_125717        | [full]      | 52956 | Yes | 19532 | 12 | 16 | Medium-quality | Genome-fragment | NA | 60.76 | 63.12 |
| 52_vs_k141_112784        | [full]      | 14453 | No  | NA    | 2  | 1  | Low-quality    | Genome-fragment | NA | 34.25 | 0     |
| 58_vs_k141_108383        | [full]      | 2637  | No  | NA    | 0  | 0  | Not-determined | Genome-fragment | NA | 0     | 0     |
| 514_vs_k141_83953        | [full]      | 14495 | No  | NA    | 5  | 1  | Low-quality    | Genome-fragment | NA | 28.65 | 0     |
| 58_vs_k141_21496         | [full]      | 1957  | No  | NA    | 0  | 1  | Not-determined | Genome-fragment | NA | 0     | 0     |
| 58_vs_k141_203303        | [full]      | 1384  | No  | NA    | 0  | 0  | Not-determined | Genome-fragment | NA | 0     | 0     |
| 52_extracted_k141_10026  | [full]      | 14499 | No  | NA    | 1  | 2  | Low-quality    | Genome-fragment | NA | 7.86  | 0     |
| 51_vs_k141_134505        | [full]      | 14500 | No  | NA    | 5  | 0  | Low-quality    | Genome-fragment | NA | 20.66 | 0     |
| 58_vs_k141_56261         | [full]      | 2474  | No  | NA    | 2  | 0  | Not-determined | Genome-fragment | NA | 0     | 0     |
| 516_extracted_38573      | [full]      | 14500 | No  | NA    | 0  | 8  | Low-quality    | Genome-fragment | NA | 8.15  | 0     |
| 58_vs_k141_41531         | [full]      | 38039 | No  | NA    | 1  | 18 | Medium-quality | Genome-fragment | NA | 56.91 | 0     |
| 510_vs_29922             | [full]      | 14501 | No  | NA    | 0  | 0  | Low-quality    | Genome-fragment | NA | 34.77 | 0     |
| 55_extracted_k141_27685  | [full]      | 14510 | No  | NA    | 10 | 0  | Low-quality    | Genome-fragment | NA | 24.17 | 0     |
| 511_extracted_k141_76399 | [full]      | 14548 | Yes | 11495 | 6  | 2  | Low-quality    | Genome-fragment | NA | 12.21 | 21.09 |
| 58_vs_k141_108427        | [full]      | 1975  | No  | NA    | 0  | 0  | Not-determined | Genome-fragment | NA | 0     | 0     |
| 57_extracted_118384      | [full]      | 14591 | No  | NA    | 5  | 0  | Low-quality    | Genome-fragment | NA | 30.14 | 0     |
| 516_vs_58126             | [full]      | 14603 | No  | NA    | 1  | 5  | Low-quality    | Genome-fragment | NA | 22.1  | 0     |
| 58_vs_k141_144627        | [full]      | 1777  | No  | NA    | 0  | 1  | Not-determined | Genome-fragment | NA | 0     | 0     |
| 58_extracted_k141_181943 | [full]      | 14672 | No  | NA    | 10 | 1  | Low-quality    | Genome-fragment | NA | 25.7  | 0     |
| 58_vs_k141_108446        | [full]      | 2166  | No  | NA    | 0  | 0  | Not-determined | Genome-fragment | NA | 0     | 0     |
| 511_vs_k141_82077        | [0_partial] | 14685 | Yes | 10387 | 3  | 2  | Low-quality    | Genome-fragment | NA | 12.11 | 29.27 |
| 58_vs_k141_177821        | [full]      | 1428  | No  | NA    | 0  | 0  | Not-determined | Genome-fragment | NA | 0     | 0     |
| 58_vs_k141_168991        | [full]      | 1482  | No  | NA    | 0  | 1  | Not-determined | Genome-fragment | NA | 0     | 0     |
| 58_vs_k141_195258        | [full]      | 1851  | No  | NA    | 0  | 0  | Not-determined | Genome-fragment | NA | 0     | 0     |
| 57_extracted_56823       | [full]      | 14689 | No  | NA    | 7  | 0  | Low-quality    | Genome-fragment | NA | 30.9  | 0     |
| 53_vs_k141_67063         | [full]      | 14720 | No  | NA    | 5  | 0  | Low-quality    | Genome-fragment | NA | 42.57 | 0     |
| 58_vs_k141_160108        | [full]      | 1298  | No  | NA    | 0  | 1  | Not-determined | Genome-fragment | NA | 0     | 0     |
| 58_vs_k141_99670         | [full]      | 1190  | No  | NA    | 0  | 0  | Not-determined | Genome-fragment | NA | 0     | 0     |
| 58_vs_k141_103364        | [full]      | 1868  | No  | NA    | 0  | 0  | Not-determined | Genome-fragment | NA | 0     | 0     |
| 58_vs_k141_143090        | [full]      | 3331  | No  | NA    | 0  | 2  | Not-determined | Genome-fragment | NA | 0     | 0     |
| 512_vs_k141_176097       | [full]      | 14766 | No  | NA    | 4  | 0  | Low-quality    | Genome-fragment | NA | 34.37 | 0     |
| 58_vs_k141_51074         | [full]      | 2907  | No  | NA    | 0  | 0  | Not-determined | Genome-fragment | NA | 0     | 0     |
| 511_vs_k141_11756        | [full]      | 14768 | No  | NA    | 1  | 0  | Low-quality    | Genome-fragment | NA | 9.05  | 0     |
| 58_vs_k141_47220         | [full]      | 1566  | No  | NA    | 0  | 0  | Not-determined | Genome-fragment | NA | 0     | 0     |
| 58_vs_k141_116828        | [full]      | 1434  | No  | NA    | 0  | 0  | Not-determined | Genome-fragment | NA | 0     | 0     |
| 58_vs_k141_143118        | [full]      | 1047  | No  | NA    | 0  | 1  | Not-determined | Genome-fragment | NA | 0     | 0     |
| 58_vs_k141_91092         | [full]      | 1115  | No  | NA    | 0  | 1  | Not-determined | Genome-fragment | NA | 0     | 0     |
| 58_vs_k141_151490        | [full]      | 1883  | No  | NA    | 0  | 2  | Not-determined | Genome-fragment | NA | 28.02 | 0     |
| 511_vs_k141_184821       | [full]      | 14803 | No  | NA    | 6  | 0  | Low-quality    | Genome-fragment | NA | 49.91 | 0     |
| 512_extracted_k141_21393 | [full]      | 14828 | No  | NA    | 6  | 0  | Low-quality    | Genome-fragment | NA | 33.85 | 0     |
| 59_vs_k141_24869         | [full]      | 14833 | No  | NA    | 6  | 1  | Low-quality    | Genome-fragment | NA | 0     | 0     |
| 58_vs_k141_172009        | [full]      | 1134  | No  | NA    | 2  | 0  | Not-determined | Genome-fragment | NA | 0     | 0     |
| 58_vs_k141_82298         | [full]      | 1759  | No  | NA    | 0  | 4  | Not-determined | Genome-fragment | NA | 0     | 0     |
| 58_vs_k141_91122         | [full]      | 3257  | No  | NA    | 0  | 2  | Not-determined | Genome-fragment | NA | 0     | 0     |
| 58_vs_k141_172221        | [full]      | 1090  | No  | NA    | 0  | 0  | Not-determined | Genome-fragment | NA | 0     | 0     |
| 58_vs_k141_185724        | [full]      | 2951  | No  | NA    | 0  | 2  | Not-determined | Genome-fragment | NA | 0     | 0     |
| 511_vs_k141_37489        | [full]      | 14863 | No  | NA    | 3  | 0  | Low-quality    | Genome-fragment | NA | 38.12 | 0     |
| 516_vs_21589             | [full]      | 14886 | No  | NA    | 2  | 0  | Low-quality    | Genome-fragment | NA | 10.1  | 0     |
| 512_vs_k141_790651       | [full]      | 14889 | No  | NA    | 0  | 0  | Low-quality    | Genome-fragment | NA | 0     | 0     |
| 58_vs_k141_12612         | [full]      | 2184  | No  | NA    | 0  | 0  | Not-determined | Genome-fragment | NA | 0     | 0     |
| 510_vs_13617             | [full]      | 14927 | No  | NA    | 5  | 0  | Low-quality    | Genome-fragment | NA | 35.99 | 0     |
| 58_vs_k141_1143051       | [full]      | 3614  | No  | NA    | 0  | 4  | Not-determined | Genome-fragment | NA | 0     | 0     |
| 58_vs_k141_56521         | [full]      | 1701  | No  | NA    | 0  | 1  | Not-determined | Genome-fragment | NA | 0     | 0     |
| 58_vs_k141_125944        | [full]      | 1261  | No  | NA    | 0  | 0  | Not-determined | Genome-fragment | NA | 0     | 0     |
| 58_vs_k141_203486        | [full]      | 1547  | No  | NA    | 0  | 1  | Not-determined | Genome-fragment | NA | 0     | 0     |
| 58_vs_k141_56527         | [full]      | 3562  | No  | NA    | 0  | 2  | Not-determined | Genome-fragment | NA | 0     | 0     |
| 57_vs_61353              | [full]      | 14957 | No  | NA    | 13 | 1  | Low-quality    | Genome-fragment | NA | 29.61 | 0     |
| 517_vs_k141_99801        | [full]      | 14982 | No  | NA    | 1  | 2  | Low-quality    | Genome-fragment | NA | 10.13 | 0     |
| 59_vs_k141_84213         | [full]      | 14989 | Yes | 9733  | 1  | 3  | Low-quality    | Genome-fragment | NA | 18.89 | 35.07 |
| 514_vs_k141_83601        | [full]      | 14992 | No  | NA    | 16 | 0  | Low-quality    | Genome-fragment | NA | 44.46 | 0     |
| 58_vs_k141_47265         | [full]      | 76710 | Yes | 48801 | 20 | 20 | Complete       | High-quality    | NA | 100   | 36.38 |
| 53_vs_k141_14522         | [full]      | 15003 | No  | NA    | 2  | 0  | Low-quality    | Genome-fragment | NA | 9.58  | 0     |
| 58_vs_k141_12683         | [full]      | 3196  | No  | NA    | 2  | 0  | Not-determined | Genome-fragment | NA | 0     | 0     |
| 58_vs_k141_177996        | [full]      | 2755  | No  | NA    | 0  | 4  | Not-determined | Genome-fragment | NA | 0     | 0     |
| 58_vs_k141_108631        | [full]      | 1780  | No  | NA    | 0  | 2  | Not-determined | Genome-fragment | NA | 0     | 0     |
| 58_vs_k141_160162        | [full]      | 1009  | No  | NA    | 0  | 1  | Not-determined | Genome-fragment | NA | 0     | 0     |
| 515_extracted_29387      | [full]      | 15004 | No  | NA    | 0  | 12 | Low-quality    | Genome-fragment | NA | 5.72  | 0     |
| 511_vs_k141_77151        | [full]      | 15005 | No  | NA    | 5  | 0  | Low-quality    | Genome-fragment | NA | 40.04 | 0     |
| 515_vs_21281             | [full]      | 15006 | No  | NA    | 0  | 0  | Low-quality    | Genome-fragment | NA | 9.04  | 0     |
| 58_vs_k141_143289        | [full]      | 9119  | No  | NA    | 0  | 4  | Not-determined | Genome-fragment | NA | 0     | 0     |
| 58_vs_k141_4447          | [full]      | 2350  | No  | NA    | 0  | 1  | Not-determined | Genome-fragment | NA | 0     | 0     |
| 517_extracted_k141_86091 | [full]      | 15041 | No  | NA    | 0  | 0  | Low-quality    | Genome-fragment | NA | 19.09 | 0     |
| 58_vs_k141_203573        | [full]      | 4691  | No  | NA    | 0  | 0  | Not-determined | Genome-fragment | NA | 0     | 0     |
| 512_vs_k141_88274        | [full]      | 15087 | No  | NA    | 1  | 5  | Low-quality    | Genome-fragment | NA | 16.29 | 0     |
| 58_vs_k141_17347         | [full]      | 2017  | No  | NA    | 2  | 0  | Not-determined | Genome-fragment | NA | 0     | 0     |
| 55_vs_k141_108799        | [full]      | 1     |     |       |    |    |                |                 |    |       |       |



|                           |             |       |     |      |    |    |                |                 |    |       |       |
|---------------------------|-------------|-------|-----|------|----|----|----------------|-----------------|----|-------|-------|
| 58_vs_k141_47492          | [full]      | 2546  | No  | NA   | 0  | 2  | Not-determined | Genome-fragment | NA | 0     | 0     |
| 58_vs_k141_51261          | [full]      | 1774  | No  | NA   | 0  | 0  | Not-determined | Genome-fragment | NA | 0     | 0     |
| 58_vs_k141_65024          | [full]      | 2953  | No  | NA   | 0  | 0  | Not-determined | Genome-fragment | NA | 0     | 0     |
| 511_vs_k141_99934         | [full]      | 15370 | No  | NA   | 2  | 0  | Low-quality    | Genome-fragment | NA | 16.64 | 0     |
| 57_vs_123677              | [full]      | 15381 | No  | NA   | 0  | 7  | Low-quality    | Genome-fragment | NA | 4.85  | 0     |
| 53_extracted_k141_3519    | [full]      | 15382 | No  | NA   | 1  | 4  | Low-quality    | Genome-fragment | NA | 7.48  | 0     |
| 58_vs_k141_12894          | [full]      | 1691  | No  | NA   | 0  | 1  | Not-determined | Genome-fragment | NA | 0     | 0     |
| 58_vs_k141_39249          | [full]      | 2145  | No  | NA   | 0  | 1  | Not-determined | Genome-fragment | NA | 0     | 0     |
| 55_vs_k141_74464          | [full]      | 15392 | No  | NA   | 13 | 0  | Low-quality    | Genome-fragment | NA | 33.63 | 0     |
| 58_vs_k141_178256         | [full]      | 3186  | No  | NA   | 0  | 2  | Not-determined | Genome-fragment | NA | 0     | 0     |
| 58_extracted_k141_31758   | [full]      | 15395 | No  | NA   | 2  | 1  | Low-quality    | Genome-fragment | NA | 20.78 | 0     |
| 55_vs_k141_23139          | [full]      | 15408 | No  | NA   | 3  | 1  | Low-quality    | Genome-fragment | NA | 11.25 | 0     |
| 58_vs_k141_108840         | [full]      | 3477  | No  | NA   | 0  | 2  | Not-determined | Genome-fragment | NA | 0     | 0     |
| 516_vs_171618             | [full]      | 15429 | No  | NA   | 11 | 0  | Low-quality    | Genome-fragment | NA | 43.78 | 0     |
| 58_vs_k141_184630         | [0_partial] | 15449 | Yes | 3639 | 1  | 5  | Low-quality    | Genome-fragment | NA | 2.45  | 76.45 |
| 58_vs_k141_51315          | [full]      | 1048  | No  | NA   | 0  | 0  | Not-determined | Genome-fragment | NA | 0     | 0     |
| 53_vs_k141_45799          | [full]      | 15478 | No  | NA   | 5  | 1  | Low-quality    | Genome-fragment | NA | 25.67 | 0     |
| 58_vs_k141_73562          | [full]      | 2146  | No  | NA   | 0  | 2  | Not-determined | Genome-fragment | NA | 48.59 | 0     |
| 59_extracted_k141_80840   | [full]      | 15480 | No  | NA   | 0  | 0  | Not-determined | Genome-fragment | NA | 0     | 0     |
| 53_vs_k141_66595          | [0_partial] | 15486 | No  | NA   | 1  | 7  | Low-quality    | Genome-fragment | NA | 36.99 | 0     |
| 55_vs_k141_36355          | [full]      | 15487 | No  | NA   | 13 | 0  | Low-quality    | Genome-fragment | NA | 39.76 | 0     |
| 510_extracted_67295       | [full]      | 15494 | No  | NA   | 2  | 0  | Low-quality    | Genome-fragment | NA | 33.63 | 0     |
| 58_vs_k141_82581          | [full]      | 5787  | No  | NA   | 0  | 1  | Not-determined | Genome-fragment | NA | 0     | 0     |
| 53_vs_k141_45010          | [full]      | 15497 | No  | NA   | 2  | 0  | Low-quality    | Genome-fragment | NA | 20.24 | 0     |
| 58_vs_k141_82596          | [full]      | 1563  | No  | NA   | 0  | 1  | Not-determined | Genome-fragment | NA | 0     | 0     |
| 58_vs_k141_155677         | [full]      | 1474  | No  | NA   | 0  | 0  | Not-determined | Genome-fragment | NA | 0     | 0     |
| 58_vs_k141_47601          | [full]      | 4679  | No  | NA   | 0  | 2  | Not-determined | Genome-fragment | NA | 0     | 0     |
| 58_vs_k141_186021         | [full]      | 1609  | No  | NA   | 0  | 1  | Not-determined | Genome-fragment | NA | 0     | 0     |
| 58_vs_k141_186029         | [full]      | 1778  | No  | NA   | 0  | 1  | Not-determined | Genome-fragment | NA | 0     | 0     |
| 59_vs_k141_74182          | [full]      | 15537 | No  | NA   | 1  | 0  | Low-quality    | Genome-fragment | NA | 8.55  | 0     |
| 58_vs_k141_108870         | [full]      | 1207  | No  | NA   | 0  | 0  | Not-determined | Genome-fragment | NA | 0     | 0     |
| 58_vs_k141_91367          | [full]      | 9034  | No  | NA   | 0  | 6  | Not-determined | Genome-fragment | NA | 0     | 0     |
| 58_vs_k141_203882         | [full]      | 4230  | No  | NA   | 0  | 0  | Not-determined | Genome-fragment | NA | 0     | 0     |
| 58_vs_k141_30967          | [full]      | 2693  | No  | NA   | 0  | 3  | Not-determined | Genome-fragment | NA | 0     | 0     |
| 58_vs_k141_117325         | [full]      | 2640  | No  | NA   | 0  | 2  | Not-determined | Genome-fragment | NA | 0     | 0     |
| 58_vs_k141_12954          | [full]      | 2022  | No  | NA   | 0  | 1  | Not-determined | Genome-fragment | NA | 0     | 0     |
| 511_extracted_k141_45640  | [full]      | 15563 | No  | NA   | 2  | 0  | Low-quality    | Genome-fragment | NA | 35.33 | 0     |
| 58_vs_k141_100101         | [full]      | 1255  | No  | NA   | 0  | 0  | Not-determined | Genome-fragment | NA | 23.43 | 0     |
| 517_vs_k141_74850         | [full]      | 15569 | No  | NA   | 1  | 1  | Low-quality    | Genome-fragment | NA | 23.43 | 0     |
| 58_vs_k141_91403          | [full]      | 3008  | No  | NA   | 0  | 2  | Not-determined | Genome-fragment | NA | 0     | 0     |
| 58_vs_k141_140805         | [full]      | 15571 | No  | NA   | 8  | 0  | Low-quality    | Genome-fragment | NA | 23.85 | 0     |
| 512_extracted_k141_179956 | [full]      | 15575 | No  | NA   | 0  | 1  | Low-quality    | Genome-fragment | NA | 9.51  | 0     |
| 58_vs_k141_73644          | [full]      | 7117  | No  | NA   | 0  | 3  | Not-determined | Genome-fragment | NA | 0     | 0     |
| 58_vs_k141_134637         | [full]      | 2305  | No  | NA   | 0  | 1  | Not-determined | Genome-fragment | NA | 0     | 0     |
| 58_vs_k141_143605         | [full]      | 3136  | No  | NA   | 0  | 2  | Not-determined | Genome-fragment | NA | 0     | 0     |
| 58_vs_k141_31036          | [full]      | 2417  | No  | NA   | 0  | 1  | Not-determined | Genome-fragment | NA | 0     | 0     |
| 58_vs_k141_31038          | [full]      | 1726  | No  | NA   | 0  | 1  | Not-determined | Genome-fragment | NA | 0     | 0     |
| 59_vs_k141_47341          | [full]      | 15586 | No  | NA   | 7  | 0  | Low-quality    | Genome-fragment | NA | 34.37 | 0     |
| 517_vs_k141_15281         | [full]      | 15590 | No  | NA   | 0  | 0  | Low-quality    | Genome-fragment | NA | 10.52 | 0     |
| 510_vs_35639              | [full]      | 15590 | No  | NA   | 0  | 5  | Low-quality    | Genome-fragment | NA | 5.86  | 0     |
| 58_vs_k141_203962         | [full]      | 1207  | No  | NA   | 0  | 1  | Not-determined | Genome-fragment | NA | 0     | 0     |
| 58_vs_k141_134671         | [full]      | 1718  | No  | NA   | 0  | 1  | Not-determined | Genome-fragment | NA | 0     | 0     |
| 55_extracted_k141_7457    | [full]      | 15601 | No  | NA   | 0  | 10 | Low-quality    | Genome-fragment | NA | 7.26  | 0     |
| 57_vs_38423               | [full]      | 15611 | No  | NA   | 1  | 1  | Low-quality    | Genome-fragment | NA | 11.25 | 0     |
| 58_vs_k141_143608         | [full]      | 18640 | No  | NA   | 10 | 0  | Medium-quality | Genome-fragment | NA | 52.33 | 0     |
| 58_vs_k141_82671          | [full]      | 3150  | No  | NA   | 0  | 2  | Not-determined | Genome-fragment | NA | 0     | 0     |
| 58_vs_k141_169601         | [full]      | 4533  | No  | NA   | 0  | 1  | Not-determined | Genome-fragment | NA | 0     | 0     |
| 58_vs_k141_100214         | [full]      | 2021  | No  | NA   | 0  | 1  | Not-determined | Genome-fragment | NA | 0     | 0     |
| 58_vs_k141_204011         | [full]      | 2470  | No  | NA   | 0  | 1  | Not-determined | Genome-fragment | NA | 0     | 0     |
| 53_extracted_k141_30149   | [full]      | 15632 | No  | NA   | 2  | 0  | Low-quality    | Genome-fragment | NA | 9.87  | 0     |
| 512_extracted_k141_173343 | [full]      | 15657 | No  | NA   | 7  | 0  | Low-quality    | Genome-fragment | NA | 14.55 | 0     |
| 58_vs_k141_143659         | [full]      | 2059  | No  | NA   | 0  | 2  | Not-determined | Genome-fragment | NA | 0     | 0     |
| 58_vs_k141_117453         | [full]      | 3202  | No  | NA   | 0  | 0  | Not-determined | Genome-fragment | NA | 0     | 0     |
| 58_vs_k141_162688         | [full]      | 5028  | No  | NA   | 0  | 3  | Not-determined | Genome-fragment | NA | 0     | 0     |
| 510_vs_60939              | [full]      | 15665 | No  | NA   | 10 | 1  | Low-quality    | Genome-fragment | NA | 37.23 | 0     |
| 58_vs_k141_65293          | [full]      | 2120  | No  | NA   | 0  | 1  | Not-determined | Genome-fragment | NA | 0     | 0     |
| 58_vs_k141_143687         | [full]      | 3341  | No  | NA   | 0  | 2  | Not-determined | Genome-fragment | NA | 0     | 0     |
| 514_vs_k141_55896         | [full]      | 15678 | No  | NA   | 15 | 0  | Low-quality    | Genome-fragment | NA | 35.8  | 0     |
| 58_vs_k141_47865          | [full]      | 1122  | No  | NA   | 0  | 1  | Not-determined | Genome-fragment | NA | 0     | 0     |
| 58_vs_k141_169620         | [full]      | 3563  | No  | NA   | 0  | 2  | Not-determined | Genome-fragment | NA | 0     | 0     |
| 58_vs_k141_169627         | [full]      | 2570  | No  | NA   | 0  | 1  | Not-determined | Genome-fragment | NA | 0     | 0     |
| 58_vs_k141_82717          | [full]      | 14349 | No  | NA   | 0  | 1  | Not-determined | Genome-fragment | NA | 0     | 0     |
| 58_vs_k141_22335          | [full]      | 3193  | No  | NA   | 0  | 2  | Not-determined | Genome-fragment | NA | 0     | 0     |
| 517_vs_k141_64850         | [full]      | 15681 | No  | NA   | 7  | 1  | Low-quality    | Genome-fragment | NA | 28.01 | 0     |
| 58_vs_k141_143707         | [full]      | 2064  | No  | NA   | 0  | 1  | Not-determined | Genome-fragment | NA | 0     | 0     |
| 58_vs_k141_82722          | [full]      | 2550  | No  | NA   | 0  | 0  | Not-determined | Genome-fragment | NA | 0     | 0     |
| 58_vs_k141_13113          | [full]      | 2684  | No  | NA   | 0  | 1  | Not-determined | Genome-fragment | NA | 0     | 0     |
| 59_vs_k141_30339          | [full]      | 15695 | No  | NA   | 8  | 0  | Low-quality    | Genome-fragment | NA | 37.4  | 0     |
| 58_vs_k141_82738          | [full]      | 1083  | No  | NA   | 0  | 2  | Not-determined | Genome-fragment | NA | 0     | 0     |
| 516_vs_148517             | [full]      | 15727 | No  | NA   | 6  | 0  | Low-quality    | Genome-fragment | NA | 39.81 | 0     |
| 58_vs_k141_65336          | [full]      | 1392  | No  | NA   | 0  | 2  | Not-determined | Genome-fragment | NA | 0     | 0     |
| 55_extracted_k141_50906   | [full]      | 15739 | Yes | 5274 | 2  | 4  | Low-quality    | Genome-fragment | NA | 2.9   | 66.49 |
| 58_vs_k141_65343          | [full]      | 5652  | No  | NA   | 0  | 3  | Not-determined | Genome-fragment | NA | 0     | 0     |
| 58_vs_k141_47822          | [full]      | 1091  | No  | NA   | 0  | 1  | Not-determined | Genome-fragment | NA | 0     | 0     |
| 58_vs_k141_117543         | [full]      | 1928  | No  | NA   | 0  | 0  | Not-determined | Genome-fragment | NA | 8.78  | 0     |
| 58_vs_k141_47839          | [full]      | 2075  | No  | NA   | 0  | 0  | Not-determined | Genome-fragment | NA | 0     | 0     |
| 55_vs_k141_110560         | [full]      | 15747 | No  | NA   | 14 | 0  | Low-quality    | Genome-fragment | NA | 42.86 | 0     |
| 58_vs_k141_152162         | [full]      | 2231  | No  | NA   | 0  | 0  | Not-determined | Genome-fragment | NA | 0     | 0     |
| 58_vs_k141_117571         | [full]      | 1452  | No  | NA   | 0  | 0  | Not-determined | Genome-fragment | NA | 0     | 0     |
| 58_vs_k141_73879          | [full]      | 2233  | No  | NA   | 0  | 2  | Not-determined | Genome-fragment | NA | 0     | 0     |
| 511_vs_k141_4007          | [full]      | 15749 | No  | NA   | 12 | 0  | Low-quality    | Genome-fragment | NA | 44.63 | 0     |
| 58_vs_k141_169700         | [full]      | 2301  | No  | NA   | 0  | 4  | Not-determined | Genome-fragment | NA | 0     | 0     |
| 516_vs_165292             | [0_partial] | 15760 | No  | NA   | 1  | 1  | Low-quality    | Genome-fragment | NA | 12.82 | 0     |
| 53_extracted_k141_81902   | [full]      | 15761 | No  | NA   | 2  | 1  | Low-quality    | Genome-fragment | NA | 25.39 | 0     |
| 511_vs_k141_62008         | [full]      | 15776 | No  | NA   | 4  | 5  | Low-quality    | Genome-fragment | NA | 13.23 | 48.47 |
| 55_vs_k141_5252           | [full]      | 15786 | No  | NA   | 2  | 1  | Low-quality    | Genome-fragment | NA | 34.21 | 0     |
| 59_extracted_k141_78685   | [full]      | 15801 | No  | NA   | 1  | 0  | Low-quality    | Genome-fragment | NA | 9.48  | 0     |
| 58_vs_k141_124805         | [full]      | 3747  | No  | NA   | 15 | 2  | High-quality   | High-quality    | NA | 100   | 0     |
| 58_vs_k141_160965         | [full]      | 2278  | No  | NA   | 0  | 0  | Not-determined | Genome-fragment | NA | 0     | 0     |
| 58_vs_k141_57108          | [full]      | 2128  | No  | NA   | 0  | 1  | Not-determined | Genome-fragment | NA | 0     | 0     |
| 58_vs_k141_195924         | [full]      | 1795  | No  | NA   | 0  | 1  | Not-determined | Genome-fragment | NA | 0     | 0     |
| 58_vs_k141_160578         | [full]      | 2762  | No  | NA   | 0  | 1  | Not-determined | Genome-fragment | NA | 0     | 0     |
| 517_extracted_k141_155230 | [full]      | 15803 | No  | NA   | 10 | 0  | Low-quality    | Genome-fragment | NA | 35.08 | 0     |
| 58_vs_k141_117618         | [full]      | 3910  | No  | NA   | 0  | 3  | Not-determined | Genome-fragment | NA | 0     | 0     |
| 58_vs_k141_169733         | [full]      | 2528  | No  | NA   | 0  | 2  | Not-determined | Genome-fragment | NA | 0     | 0     |
| 58_vs_k141_117621         | [full]      | 3871  | No  | NA   | 0  | 0  | Not-determined | Genome-fragment | NA | 0     | 0     |
| 58_vs_k141_195935         | [full]      | 2371  | No  | NA   | 0  | 0  | Not-determined | Genome-fragment | NA | 0     | 0     |
| 58_vs_k141_65440          | [full]      | 1513  | No  | NA   | 0  | 1  | Not-determined | Genome-fragment | NA | 0     | 0     |
| 58_vs_k141_126384         | [full]      | 4074  | No  | NA   | 0  | 3  | Not-determined | Genome-fragment | NA | 0     | 0     |
| 58_vs_k141_65451          | [full]      | 2588  | No  | NA   | 0  | 1  | Not-determined | Genome-fragment | NA | 0     | 0     |
| 512_vs_k141_30812         | [full]      | 15817 | No  | NA   | 7  | 1  | Low-quality    | Genome-fragment | NA | 33.34 | 0     |
| 515_extracted_12135       | [full]      | 15828 | No  | NA   | 5  | 0  | Low-quality    | Genome-fragment | NA | 47.39 | 0     |
| 53_extracted_k141_74064   | [full]      | 15831 | No  | NA   | 4  | 1  | Low-quality    | Genome-fragment | NA | 36.23 | 0     |
| 516_vs_88961              | [full]      | 15865 | No  | NA   | 6  | 0  | Low-quality    | Genome-fragment | NA | 0     | 0     |
| 58_vs_k141_143668         | [full]      | 1256  | No  | NA   | 1  | 1  | Not-determined | Genome-fragment | NA | 0     | 0     |
| 58_vs_k141_169783         | [full]      | 1664  | No  | NA   | 0  | 1  | Not-determined | Genome-fragment | NA | 0     | 0     |
| 58_vs_k141_126428         | [full]      | 1652  | No  | NA   | 0  | 1  | Not-determined | Genome-fragment | NA | 0     | 0     |
| 513_vs_45795              | [full]      | 15866 | No  | NA   | 2  | 1  | Low-quality    | Genome-fragment | NA | 26.95 | 0     |
| 58_vs_k141_57160          | [full]      | 1160  | No  | NA   | 0  | 2  | Not-determined | Genome-fragment | NA | 0     | 0     |
| 58_vs_k141_143875         | [full]      | 3562  | No  | NA   | 0  | 2  | Not-determined | Genome-fragment | NA | 0     | 0     |
| 510_vs_70704              | [full]      | 15895 | No  | NA   | 5  | 3  | Low-quality    | Genome-fragment | NA | 32.32 | 0     |
| 58_vs_k141_65853          | [full]      | 4085  | No  | NA   | 0  | 2  | Not-determined | Genome-fragment | NA | 0     | 0     |
| 52_extracted_k141_31738   | [full]      | 15920 | No  | NA   | 11 | 2  | Low-quality    | Genome-fragment | NA | 39.43 | 0     |
| 512_extracted_k141_129616 | [full]      | 15926 | No  | NA   | 9  | 1  | Low-quality    | Genome-fragment | NA | 42.41 | 0     |
| 58_vs_k141_79315          | [full]      | 3987  | No  | NA   | 0  | 1  | Not-determined | Genome-fragment | NA | 14.6  | 0     |
| 513_extracted_138148      | [full]      | 15930 | No  | NA   | 6  | 0  | Low-quality    | Genome-fragment | NA | 0     | 0</   |



|                               |       |     |      |    |    |                |                 |       |       |   |
|-------------------------------|-------|-----|------|----|----|----------------|-----------------|-------|-------|---|
| 58_vs_k141_57385  full        | 6831  | No  | NA   | 0  | 3  | Not-determined | Genome-fragment | NA    | 0     | 0 |
| 513_extracted_54510           | 16153 | No  | NA   | 0  | 1  | Low-quality    | Genome-fragment | 6.49  | 0     | 0 |
| 516_vs_136989  full           | 16154 | No  | NA   | 6  | 0  | Low-quality    | Genome-fragment | 6.87  | 0     | 0 |
| 58_vs_k141_4984  full         | 2205  | No  | NA   | 0  | 2  | Not-determined | Genome-fragment | NA    | 0     | 0 |
| 58_vs_k141_196163  full       | 2340  | No  | NA   | 0  | 0  | Not-determined | Genome-fragment | NA    | 0     | 0 |
| 512_vs_k141_184333  0_partial | 16163 | No  | NA   | 0  | 10 | Low-quality    | Genome-fragment | 15.85 | 0     | 0 |
| 514_vs_k141_77141  full       | 16172 | No  | NA   | 2  | 0  | Low-quality    | Genome-fragment | 43.08 | 0     | 0 |
| 58_vs_k141_109348  full       | 1342  | No  | NA   | 0  | 0  | Not-determined | Genome-fragment | NA    | 0     | 0 |
| 58_vs_k141_74082  full        | 1506  | No  | NA   | 1  | 0  | Not-determined | Genome-fragment | NA    | 0     | 0 |
| 55_vs_k141_73497  full        | 16186 | No  | NA   | 3  | 0  | Low-quality    | Genome-fragment | 29.9  | 0     | 0 |
| 58_vs_k141_196174  full       | 1118  | No  | NA   | 0  | 0  | Not-determined | Genome-fragment | NA    | 0     | 0 |
| 510_extracted_10743           | 16212 | Yes | 6078 | 3  | 1  | Low-quality    | Genome-fragment | 1.7   | 62.51 | 0 |
| 58_vs_k141_22757  full        | 7275  | No  | NA   | 0  | 1  | Not-determined | Genome-fragment | NA    | 0     | 0 |
| 58_vs_k141_39966  full        | 1628  | No  | NA   | 0  | 0  | Not-determined | Genome-fragment | NA    | 0     | 0 |
| 516_vs_24728  full            | 16221 | No  | NA   | 4  | 0  | Low-quality    | Genome-fragment | 6.54  | 0     | 0 |
| 517_vs_k141_108547  full      | 16225 | No  | 7204 | 8  | 0  | Low-quality    | Genome-fragment | 45.33 | 0     | 0 |
| 512_extracted_k141_18900      | 16234 | Yes | 7204 | 2  | 4  | Low-quality    | Genome-fragment | 5.37  | 55.62 | 0 |
| 58_vs_k141_22770  full        | 1881  | No  | NA   | 0  | 0  | Not-determined | Genome-fragment | NA    | 0     | 0 |
| 58_vs_k141_196192  full       | 1428  | No  | NA   | 0  | 0  | Not-determined | Genome-fragment | NA    | 0     | 0 |
| 59_vs_k141_54746  full        | 16242 | No  | NA   | 9  | 0  | Low-quality    | Genome-fragment | 43.77 | 0     | 0 |
| 58_vs_k141_13544  full        | 9084  | No  | NA   | 0  | 4  | Not-determined | Genome-fragment | NA    | 0     | 0 |
| 57_vs_k1448  full             | 16265 | No  | NA   | 2  | 0  | Low-quality    | Genome-fragment | 16.71 | 0     | 0 |
| 58_vs_k141_22803  full        | 2374  | No  | NA   | 0  | 3  | Not-determined | Genome-fragment | NA    | 0     | 0 |
| 58_vs_k141_117871  full       | 9410  | No  | NA   | 0  | 5  | Not-determined | Genome-fragment | NA    | 0     | 0 |
| 58_vs_k141_5047  full         | 1434  | No  | NA   | 0  | 1  | Not-determined | Genome-fragment | NA    | 0     | 0 |
| 514_vs_k141_9168  full        | 16280 | No  | NA   | 1  | 0  | Low-quality    | Genome-fragment | 42.64 | 0     | 0 |
| 58_vs_k141_135041  full       | 4110  | No  | NA   | 0  | 0  | Not-determined | Genome-fragment | NA    | 0     | 0 |
| 58_vs_k141_5069  full         | 2222  | No  | NA   | 0  | 1  | Not-determined | Genome-fragment | NA    | 0     | 0 |
| 58_vs_k141_186515  full       | 1377  | No  | NA   | 0  | 2  | Not-determined | Genome-fragment | NA    | 0     | 0 |
| 58_vs_k141_170149  full       | 1982  | No  | NA   | 0  | 1  | Not-determined | Genome-fragment | NA    | 0     | 0 |
| 58_vs_k141_152553  full       | 31203 | No  | NA   | 15 | 2  | Medium-quality | Genome-fragment | 70.88 | 0     | 0 |
| 58_vs_k141_204432  full       | 1470  | No  | NA   | 0  | 0  | Not-determined | Genome-fragment | NA    | 0     | 0 |
| 511_extracted_k141_33350      | 16299 | No  | NA   | 8  | 0  | Low-quality    | Genome-fragment | 10.75 | 0     | 0 |
| 514_vs_k141_66216  full       | 16315 | No  | NA   | 6  | 0  | Low-quality    | Genome-fragment | 44.58 | 0     | 0 |
| 58_vs_k141_126582  full       | 60732 | No  | NA   | 9  | 0  | Medium-quality | Genome-fragment | 74.07 | 0     | 0 |
| 53_extracted_k141_125443      | 16322 | No  | NA   | 0  | 1  | Low-quality    | Genome-fragment | 9.23  | 0     | 0 |
| 58_vs_k141_152575  full       | 2049  | No  | NA   | 0  | 0  | Not-determined | Genome-fragment | NA    | 0     | 0 |
| 58_vs_k141_22847  full        | 2982  | No  | NA   | 0  | 3  | Not-determined | Genome-fragment | NA    | 0     | 0 |
| 58_vs_k141_204464  full       | 2197  | No  | NA   | 0  | 0  | Not-determined | Genome-fragment | NA    | 0     | 0 |
| 58_vs_k141_196247  full       | 14237 | No  | NA   | 1  | 0  | Medium-quality | Genome-fragment | 88.12 | 0     | 0 |
| 58_vs_k141_117929  full       | 2615  | No  | NA   | 0  | 1  | Not-determined | Genome-fragment | NA    | 0     | 0 |
| 58_vs_k141_196254  full       | 1319  | No  | NA   | 0  | 1  | Not-determined | Genome-fragment | NA    | 0     | 0 |
| 58_vs_k141_170196  full       | 1784  | No  | NA   | 0  | 0  | Not-determined | Genome-fragment | NA    | 0     | 0 |
| 58_vs_k141_91951  full        | 7286  | No  | NA   | 0  | 4  | Not-determined | Genome-fragment | NA    | 0     | 0 |
| 510_vs_39758  0_partial       | 16338 | No  | NA   | 2  | 10 | Low-quality    | Genome-fragment | 5.85  | 0     | 0 |
| 512_extracted_k141_149688     | 16338 | No  | NA   | 5  | 2  | Low-quality    | Genome-fragment | 31.77 | 0     | 0 |
| 56_vs_k141_43694  full        | 16338 | No  | NA   | 0  | 14 | Low-quality    | Genome-fragment | 6.73  | 0     | 0 |
| 58_vs_k141_186572  full       | 3208  | No  | NA   | 0  | 2  | Not-determined | Genome-fragment | NA    | 0     | 0 |
| 58_vs_k141_152645  full       | 4622  | No  | NA   | 0  | 0  | Not-determined | Genome-fragment | NA    | 0     | 0 |
| 58_vs_k141_109497  full       | 1990  | No  | NA   | 0  | 0  | Not-determined | Genome-fragment | NA    | 0     | 0 |
| 517_extracted_k141_140590     | 16351 | No  | NA   | 1  | 2  | Low-quality    | Genome-fragment | 24.74 | 0     | 0 |
| 58_vs_k141_145158  full       | 16372 | No  | NA   | 1  | 0  | Low-quality    | Genome-fragment | 40.1  | 0     | 0 |
| 58_vs_k141_92001  full        | 2894  | No  | NA   | 0  | 3  | Not-determined | Genome-fragment | NA    | 0     | 0 |
| 53_vs_k141_47385  full        | 16390 | No  | NA   | 4  | 0  | Low-quality    | Genome-fragment | 9     | 0     | 0 |
| 52_vs_k141_171714  full       | 16394 | No  | NA   | 3  | 2  | Low-quality    | Genome-fragment | 38.25 | 0     | 0 |
| 515_extracted_777             | 16459 | No  | NA   | 0  | 15 | Low-quality    | Genome-fragment | 7.06  | 0     | 0 |
| 58_vs_k141_178901  full       | 1214  | No  | NA   | 0  | 1  | Not-determined | Genome-fragment | NA    | 0     | 0 |
| 59_vs_k141_24121  full        | 16446 | No  | NA   | 1  | 0  | Low-quality    | Genome-fragment | 14.13 | 0     | 0 |
| 58_vs_k141_109543  full       | 2651  | No  | NA   | 0  | 0  | Not-determined | Genome-fragment | NA    | 0     | 0 |
| 58_vs_k141_48241  full        | 2216  | No  | NA   | 0  | 0  | Not-determined | Genome-fragment | NA    | 0     | 0 |
| 58_extracted_k141_143081      | 16447 | No  | NA   | 0  | 13 | Low-quality    | Genome-fragment | 9.75  | 0     | 0 |
| 58_vs_k141_13713  full        | 3543  | No  | NA   | 0  | 5  | Not-determined | Genome-fragment | NA    | 0     | 0 |
| 58_vs_k141_178979  full       | 2572  | No  | NA   | 0  | 2  | Not-determined | Genome-fragment | NA    | 0     | 0 |
| 58_vs_k141_5211  full         | 26189 | No  | NA   | 13 | 0  | Medium-quality | Genome-fragment | 76.35 | 0     | 0 |
| 515_vs_64960  full            | 16449 | No  | NA   | 0  | 8  | Low-quality    | Genome-fragment | 6.23  | 0     | 0 |
| 58_vs_k141_13723  full        | 11808 | No  | NA   | 0  | 2  | Not-determined | Genome-fragment | NA    | 0     | 0 |
| 58_vs_k141_152764  full       | 1375  | No  | NA   | 0  | 0  | Not-determined | Genome-fragment | NA    | 0     | 0 |
| 51_vs_k141_147956  full       | 16453 | Yes | 9653 | 2  | 3  | Low-quality    | Genome-fragment | 11.37 | 41.33 | 0 |
| 58_vs_k141_161091  full       | 1524  | No  | NA   | 0  | 1  | Not-determined | Genome-fragment | NA    | 0     | 0 |
| 58_vs_k141_179011  full       | 1310  | No  | NA   | 0  | 0  | Not-determined | Genome-fragment | NA    | 0     | 0 |
| 512_extracted_k141_82399      | 16466 | No  | NA   | 6  | 0  | Low-quality    | Genome-fragment | 25.81 | 0     | 0 |
| 53_vs_k141_96207  full        | 16481 | No  | NA   | 14 | 0  | Low-quality    | Genome-fragment | 27.35 | 0     | 0 |
| 58_vs_k141_161102  full       | 1441  | No  | NA   | 0  | 0  | Not-determined | Genome-fragment | NA    | 0     | 0 |
| 58_vs_k141_18149  full        | 1324  | No  | NA   | 0  | 3  | Not-determined | Genome-fragment | NA    | 0     | 0 |
| 514_vs_k141_29918  full       | 16498 | No  | NA   | 0  | 6  | Low-quality    | Genome-fragment | 9.75  | 0     | 0 |
| 58_vs_k141_133942  full       | 16517 | No  | NA   | 3  | 0  | Low-quality    | Genome-fragment | 25.96 | 0     | 0 |
| 58_vs_k141_196429  full       | 2258  | No  | NA   | 0  | 0  | Not-determined | Genome-fragment | NA    | 0     | 0 |
| 512_extracted_k141_17137      | 16532 | No  | NA   | 0  | 12 | Low-quality    | Genome-fragment | 10.1  | 0     | 0 |
| 59_vs_k141_16826  full        | 16546 | No  | NA   | 0  | 2  | Low-quality    | Genome-fragment | 29.73 | 0     | 0 |
| 517_vs_k141_166099  full      | 16547 | No  | NA   | 14 | 0  | Low-quality    | Genome-fragment | 48.52 | 0     | 0 |
| 58_vs_k141_165894  full       | 2131  | No  | NA   | 0  | 0  | Not-determined | Genome-fragment | NA    | 0     | 0 |
| 58_vs_k141_152829  full       | 1562  | No  | NA   | 0  | 0  | Not-determined | Genome-fragment | NA    | 0     | 0 |
| 59_vs_k141_8552  full         | 16588 | No  | NA   | 4  | 0  | Low-quality    | Genome-fragment | 29.07 | 0     | 0 |
| 510_extracted_16483           | 16629 | No  | NA   | 13 | 0  | Low-quality    | Genome-fragment | 42.56 | 0     | 0 |
| 58_vs_k141_23104  full        | 1650  | No  | NA   | 0  | 1  | Not-determined | Genome-fragment | NA    | 0     | 0 |
| 59_vs_k141_31202  full        | 16638 | No  | NA   | 10 | 0  | Low-quality    | Genome-fragment | 49.71 | 0     | 0 |
| 516_vs_6181  full             | 16639 | No  | NA   | 5  | 0  | Low-quality    | Genome-fragment | 23.59 | 0     | 0 |
| 511_vs_k141_23935  full       | 16646 | No  | NA   | 6  | 1  | Low-quality    | Genome-fragment | 39.71 | 0     | 0 |
| 58_vs_k141_13715  full        | 2557  | No  | NA   | 0  | 2  | Not-determined | Genome-fragment | NA    | 0     | 0 |
| 58_vs_k141_40150  full        | 2068  | No  | NA   | 0  | 1  | Not-determined | Genome-fragment | NA    | 0     | 0 |
| 58_vs_k141_40157  full        | 1204  | No  | NA   | 0  | 0  | Not-determined | Genome-fragment | NA    | 0     | 0 |
| 51_extracted_k141_20127       | 16657 | No  | NA   | 0  | 1  | Low-quality    | Genome-fragment | 37.12 | 0     | 0 |
| 58_vs_k141_48449  full        | 3067  | No  | NA   | 0  | 3  | Not-determined | Genome-fragment | NA    | 0     | 0 |
| 58_vs_k141_196544  full       | 2160  | No  | NA   | 0  | 2  | Not-determined | Genome-fragment | NA    | 0     | 0 |
| 58_vs_k141_161216  full       | 1819  | No  | NA   | 0  | 2  | Not-determined | Genome-fragment | NA    | 0     | 0 |
| 58_vs_k141_161222  full       | 1179  | No  | NA   | 0  | 0  | Not-determined | Genome-fragment | NA    | 0     | 0 |
| 58_vs_k141_109691  full       | 1176  | No  | NA   | 0  | 1  | Not-determined | Genome-fragment | NA    | 0     | 0 |
| 53_extracted_k141_108362      | 16658 | No  | NA   | 2  | 1  | Low-quality    | Genome-fragment | 21.28 | 0     | 0 |
| 511_vs_k141_731  full         | 16666 | No  | NA   | 0  | 1  | Low-quality    | Genome-fragment | 36.6  | 0     | 0 |
| 58_vs_k141_170439  full       | 3901  | No  | NA   | 0  | 1  | Not-determined | Genome-fragment | NA    | 0     | 0 |
| 512_vs_k141_12137  full       | 16710 | No  | 5077 | 4  | 8  | Low-quality    | Genome-fragment | 12.41 | 69.62 | 0 |
| 58_vs_k141_100484  full       | 1326  | No  | NA   | 0  | 2  | Not-determined | Genome-fragment | NA    | 0     | 0 |
| 54_extracted_27624            | 16720 | No  | NA   | 15 | 0  | Low-quality    | Genome-fragment | 42.04 | 0     | 0 |
| 58_vs_k141_83520  full        | 2011  | No  | NA   | 0  | 1  | Not-determined | Genome-fragment | NA    | 0     | 0 |
| 58_vs_k141_186774  full       | 1096  | No  | NA   | 0  | 0  | Not-determined | Genome-fragment | NA    | 0     | 0 |
| 53_extracted_k141_126367      | 16729 | No  | NA   | 1  | 0  | Low-quality    | Genome-fragment | 19.43 | 0     | 0 |
| 515_extracted_33563           | 16748 | No  | NA   | 0  | 4  | Low-quality    | Genome-fragment | 18.67 | 0     | 0 |
| 58_vs_k141_196598  full       | 4295  | No  | NA   | 0  | 2  | Not-determined | Genome-fragment | NA    | 0     | 0 |
| 58_vs_k141_118275  full       | 1467  | No  | NA   | 0  | 0  | Not-determined | Genome-fragment | NA    | 0     | 0 |
| 58_vs_k141_74470  full        | 2522  | No  | NA   | 0  | 1  | Not-determined | Genome-fragment | NA    | 0     | 0 |
| 58_vs_k141_204735  full       | 1311  | No  | NA   | 0  | 1  | Not-determined | Genome-fragment | NA    | 0     | 0 |
| 56_vs_k141_14170  full        | 16776 | No  | NA   | 0  | 1  | Low-quality    | Genome-fragment | 38.71 | 0     | 0 |
| 58_vs_k141_109713  full       | 9226  | No  | NA   | 0  | 6  | Not-determined | Genome-fragment | NA    | 0     | 0 |
| 511_extracted_k141_75122      | 16806 | No  | NA   | 4  | 0  | Low-quality    | Genome-fragment | 28.32 | 0     | 0 |
| 516_vs_103881  full           | 16814 | No  | NA   | 2  | 0  | Low-quality    | Genome-fragment | 25.46 | 0     | 0 |
| 58_vs_k141_109718  full       | 1554  | No  | NA   | 0  | 2  | Not-determined | Genome-fragment | NA    | 0     | 0 |
| 516_vs_20849  full            | 18822 | No  | NA   | 0  | 12 | Low-quality    | Genome-fragment | 6.97  | 0     | 0 |
| 58_vs_k141_83575  full        | 2547  | No  | NA   | 0  | 2  | Not-determined | Genome-fragment | NA    | 0     | 0 |
| 55_vs_k141_138145  full       | 16870 | No  | NA   | 15 | 0  | Low-quality    | Genome-fragment | NA    | 41.49 | 0 |
| 58_vs_k141_170490  full       | 1856  | No  | NA   | 0  | 2  | Not-determined | Genome-fragment | NA    | 0     | 0 |
| 58_vs_k141_13862  full        | 2460  | No  | NA   | 0  | 2  | Not-determined | Genome-fragment | NA    | 0     | 0 |
| 57_extracted_79190            | 16872 | No  | NA   | 13 | 0  | Low-quality    | Genome-fragment | 12.34 | 0     | 0 |
| 58_vs_k141_135497  full       | 3178  | No  | NA   | 0  | 1  | Not-determined | Genome-fragment | NA    | 0     | 0 |
| 58_vs_k141_109752  full       | 3924  | No  | NA   | 0  | 2  | Not-determined | Genome-fragment | NA    | 0     | 0 |
| 517_extracted_k141_140349     | 16914 | No  | NA   | 15 | 0  | Low-quality    | Genome-fragment | 9.3   | 0     | 0 |
| 57_vs_97822  full             | 16914 | No  | NA   | 11 | 0  | Low-quality    | Genome-fragment | 45.86 | 0     | 0 |
| 53_extracted_k141_35217       | 16918 | No  | NA   | 1  | 3  | Low-quality    | Genome-fragment | 1.36  | 0     | 0 |
| 58_vs_k141_100595  full       | 2168  | No  | NA   | 0  | 0  | Not-determined | Genome-fragment | NA    | 0     | 0 |
| 516_vs_9234  full             | 16919 | No  | NA   | 4  | 0  | Low-quality    | Genome-fragment | 6.72  | 0     | 0 |
| 58_vs_k141_153050  full       | 1924  | No  | NA   | 0  | 2  | Not-determined | Genome-fragment | NA    | 0     | 0 |
| 511_vs_k141_53039  full       | 16922 | No  | NA   | 2  | 4  | Low-quality    | Genome-fragment | 40.73 | 0     | 0 |
| 511_extracted_k141_12206      | 16938 | No  |      |    |    |                |                 |       |       |   |



|                            |             |       |     |       |    |                |                 |                 |       |       |
|----------------------------|-------------|-------|-----|-------|----|----------------|-----------------|-----------------|-------|-------|
| 58_vs_k141_92532           | [full]      | 4088  | No  | NA    | 0  | 2              | Not-determined  | Genome-fragment | NA    | 0     |
| 58_vs_k141_14078           | [full]      | 6562  | No  | NA    | 6  | Not-determined | Genome-fragment | NA              | 0     |       |
| 58_vs_k141_118572          | [full]      | 3486  | No  | NA    | 0  | 1              | Not-determined  | Genome-fragment | NA    | 0     |
| 58_vs_k141_7471            | [full]      | 1173  | No  | NA    | 0  | 0              | Not-determined  | Genome-fragment | NA    | 0     |
| 58_vs_k141_196815          | [full]      | 7455  | No  | NA    | 0  | 1              | Not-determined  | Genome-fragment | NA    | 0     |
| 58_vs_k141_12013           | [full]      | 2428  | No  | NA    | 0  | 2              | Not-determined  | Genome-fragment | NA    | 0     |
| 58_vs_k141_23333           | [full]      | 3095  | No  | NA    | 0  | 1              | Not-determined  | Genome-fragment | NA    | 0     |
| 53_extracted_k141_49949    |             | 17164 | No  | NA    | 15 | 0              | Low-quality     | Genome-fragment | NA    | 46.43 |
| 54_vs_VtkSvome_23805-cat_1 |             | 11710 | No  | NA    | 13 | 0              | Low-quality     | Genome-fragment | NA    | 28.1  |
| 58_vs_k141_207729          | [full]      | 17171 | Yes | 10480 | 4  | 4              | Low-quality     | Genome-fragment | NA    | 16.98 |
| 58_vs_k141_170710          | [full]      | 4936  | No  | NA    | 0  | 3              | Not-determined  | Genome-fragment | NA    | 0     |
| 58_vs_k141_56219           | [full]      | 2338  | No  | NA    | 0  | 1              | Not-determined  | Genome-fragment | NA    | 0     |
| 56_vs_k141_36309           | [full]      | 17180 | No  | NA    | 1  | 7              | Low-quality     | Genome-fragment | NA    | 15.51 |
| 516_vs_134707              | [full]      | 17183 | No  | NA    | 0  | 5              | Low-quality     | Genome-fragment | NA    | 30.32 |
| 58_vs_k141_161570          | [full]      | 2585  | No  | NA    | 0  | 1              | Not-determined  | Genome-fragment | NA    | 0     |
| 58_vs_k141_179381          | [full]      | 1828  | No  | NA    | 0  | 1              | Not-determined  | Genome-fragment | NA    | 0     |
| 58_vs_k141_179384          | [full]      | 2029  | No  | NA    | 0  | 2              | Not-determined  | Genome-fragment | NA    | 0     |
| 58_vs_k141_204980          | [full]      | 3518  | No  | NA    | 0  | 0              | Not-determined  | Genome-fragment | NA    | 0     |
| 58_vs_k141_50933           | [full]      | 17256 | No  | NA    | 6  | 0              | Low-quality     | Genome-fragment | NA    | 28.3  |
| 57_vs_23653                | [full]      | 17269 | Yes | 5165  | 2  | 4              | Low-quality     | Genome-fragment | NA    | 3.21  |
| 58_vs_k141_83680           | [full]      | 2464  | No  | NA    | 0  | 1              | Not-determined  | Genome-fragment | NA    | 0     |
| 58_vs_k141_58154           | [full]      | 1800  | No  | NA    | 0  | 1              | Not-determined  | Genome-fragment | NA    | 0     |
| 53_vs_k141_8814            | [full]      | 17275 | Yes | 4966  | 3  | 7              | Low-quality     | Genome-fragment | NA    | 6.3   |
| 58_vs_k141_205008          | [full]      | 1547  | No  | NA    | 0  | 1              | Not-determined  | Genome-fragment | NA    | 0     |
| 53_extracted_k141_7573     |             | 17309 | No  | NA    | 8  | 0              | Low-quality     | Genome-fragment | NA    | 19.43 |
| 511_extracted_k141_22731   |             | 17336 | No  | NA    | 5  | 1              | Low-quality     | Genome-fragment | NA    | 35.82 |
| 58_vs_k141_32070           | [full]      | 1566  | No  | NA    | 0  | 0              | Not-determined  | Genome-fragment | NA    | 0     |
| 58_vs_k141_70746           | [full]      | 17341 | No  | NA    | 0  | 0              | Low-quality     | Genome-fragment | NA    | 28.86 |
| 57_vs_11173                | [full]      | 17378 | No  | NA    | 1  | 1              | Low-quality     | Genome-fragment | NA    | 0     |
| 514_vs_k141_10416          | [full]      | 17380 | Yes | 16379 | 17 | 2              | Low-quality     | Genome-fragment | NA    | 34.26 |
| 510_extracted_94555        |             | 17382 | No  | NA    | 1  | 0              | Low-quality     | Genome-fragment | NA    | 10.76 |
| 58_vs_k141_53539           | [full]      | 4929  | No  | NA    | 2  | Not-determined | Genome-fragment | NA              | 0     |       |
| 58_vs_k141_144722          | [full]      | 1237  | No  | NA    | 0  | 0              | Not-determined  | Genome-fragment | NA    | 0     |
| 58_vs_k141_161638          | [full]      | 2525  | No  | NA    | 0  | 0              | Not-determined  | Genome-fragment | NA    | 0     |
| 56_vs_k141_4492            | [full]      | 17420 | No  | NA    | 4  | 1              | Low-quality     | Genome-fragment | NA    | 33.48 |
| 58_vs_k141_196027          | [full]      | 1419  | No  | NA    | 0  | 1              | Not-determined  | Genome-fragment | NA    | 0     |
| 510_vs_21554               | [full]      | 17425 | No  | NA    | 9  | 0              | Low-quality     | Genome-fragment | NA    | 27.57 |
| 58_vs_k141_161654          | [full]      | 1427  | No  | NA    | 0  | 1              | Not-determined  | Genome-fragment | NA    | 0     |
| 514_vs_k141_97007          | [full]      | 17454 | No  | NA    | 0  | 1              | Low-quality     | Genome-fragment | NA    | 35.74 |
| 58_vs_k141_66307           | [full]      | 4727  | No  | NA    | 0  | 6              | Not-determined  | Genome-fragment | NA    | 0     |
| 511_vs_k141_51682          | [full]      | 17460 | No  | NA    | 1  | 3              | Low-quality     | Genome-fragment | NA    | 31.36 |
| 58_vs_k141_52596           | [full]      | 1723  | No  | NA    | 0  | 2              | Not-determined  | Genome-fragment | NA    | 0     |
| 57_vs_118876               | [full]      | 17467 | No  | NA    | 9  | 1              | Low-quality     | Genome-fragment | NA    | 37.24 |
| 58_vs_k141_58209           | [full]      | 1448  | No  | NA    | 0  | 1              | Not-determined  | Genome-fragment | NA    | 0     |
| 56_vs_k141_166769          | [full]      | 17467 | No  | NA    | 6  | 0              | Low-quality     | Genome-fragment | NA    | 10.86 |
| 53_extracted_k141_80637    |             | 17493 | No  | NA    | 5  | 0              | Low-quality     | Genome-fragment | NA    | 14.27 |
| 516_vs_8144                | [full]      | 17541 | No  | NA    | 0  | 3              | Low-quality     | Genome-fragment | NA    | 22.96 |
| 58_vs_k141_161694          | [full]      | 1605  | No  | NA    | 0  | 3              | Not-determined  | Genome-fragment | NA    | 0     |
| 58_vs_k141_100924          | [full]      | 1000  | No  | NA    | 0  | 2              | Not-determined  | Genome-fragment | NA    | 0     |
| 59_vs_k141_12228           | [full]      | 17542 | No  | NA    | 4  | 0              | Low-quality     | Genome-fragment | NA    | 48.91 |
| 514_vs_k141_17330          | [full]      | 17549 | No  | NA    | 0  | 0              | Low-quality     | Genome-fragment | NA    | 29.41 |
| 58_vs_k141_66349           | [full]      | 1229  | No  | NA    | 0  | 1              | Not-determined  | Genome-fragment | NA    | 0     |
| 55_vs_k141_33103           | [0_partial] | 17578 | No  | NA    | 0  | 5              | Low-quality     | Genome-fragment | NA    | 25.3  |
| 517_vs_k141_69105          | [full]      | 17613 | No  | NA    | 9  | 1              | Low-quality     | Genome-fragment | NA    | 37.49 |
| 59_vs_k141_20608           | [full]      | 17628 | No  | NA    | 12 | Low-quality    | Genome-fragment | NA              | 14.27 |       |
| 55_vs_k141_78604           | [full]      | 17647 | No  | NA    | 9  | 0              | Low-quality     | Genome-fragment | NA    | 43.19 |
| 58_vs_k141_118752          | [full]      | 6039  | No  | NA    | 0  | 5              | Not-determined  | Genome-fragment | NA    | 0     |
| 58_vs_k141_179505          | [full]      | 1505  | No  | NA    | 0  | 2              | Not-determined  | Genome-fragment | NA    | 0     |
| 53_extracted_k141_57987    |             | 17667 | No  | NA    | 0  | 0              | Low-quality     | Genome-fragment | NA    | 20.39 |
| 517_vs_k141_136494         | [full]      | 17675 | Yes | 13481 | 3  | 4              | Low-quality     | Genome-fragment | NA    | 33.13 |
| 58_vs_k141_66376           | [full]      | 1317  | No  | NA    | 0  | 0              | Not-determined  | Genome-fragment | NA    | 0     |
| 58_vs_k141_179516          | [full]      | 1185  | No  | NA    | 0  | 1              | Not-determined  | Genome-fragment | NA    | 0     |
| 53_extracted_k141_117113   |             | 17708 | No  | NA    | 9  | 0              | Low-quality     | Genome-fragment | NA    | 8.56  |
| 58_vs_k141_14246           | [full]      | 1765  | No  | NA    | 0  | 0              | Not-determined  | Genome-fragment | NA    | 0     |
| 516_extracted_16876        |             | 17716 | No  | NA    | 0  | 0              | Low-quality     | Genome-fragment | NA    | 28.6  |
| 58_vs_k141_14252           | [full]      | 2320  | No  | NA    | 0  | 3              | Not-determined  | Genome-fragment | NA    | 0     |
| 58_vs_k141_187229          | [full]      | 1698  | No  | NA    | 0  | 0              | Not-determined  | Genome-fragment | NA    | 0     |
| 510_vs_109342              | [full]      | 17725 | No  | NA    | 3  | 0              | Low-quality     | Genome-fragment | NA    | 25.57 |
| 58_vs_k141_110187          | [full]      | 1956  | No  | NA    | 0  | 2              | Not-determined  | Genome-fragment | NA    | 0     |
| 512_vs_k141_35218          | [full]      | 17742 | No  | NA    | 13 | 0              | Low-quality     | Genome-fragment | NA    | 28.63 |
| 55_vs_k141_111002          | [full]      | 17781 | No  | NA    | 12 | 0              | Low-quality     | Genome-fragment | NA    | 41.44 |
| 58_vs_k141_110211          | [full]      | 1714  | No  | NA    | 0  | 1              | Not-determined  | Genome-fragment | NA    | 0     |
| 58_vs_k141_58302           | [full]      | 1532  | No  | NA    | 0  | 2              | Not-determined  | Genome-fragment | NA    | 0     |
| 58_vs_k141_74992           | [full]      | 1093  | No  | NA    | 0  | 1              | Not-determined  | Genome-fragment | NA    | 0     |
| 58_vs_k141_197015          | [full]      | 1279  | No  | NA    | 0  | 1              | Not-determined  | Genome-fragment | NA    | 0     |
| 58_vs_k141_144927          | [full]      | 1480  | No  | NA    | 0  | 0              | Not-determined  | Genome-fragment | NA    | 0     |
| 58_vs_k141_153356          | [full]      | 1727  | No  | NA    | 0  | 1              | Not-determined  | Genome-fragment | NA    | 0     |
| 58_vs_k141_101020          | [full]      | 1906  | No  | NA    | 0  | 1              | Not-determined  | Genome-fragment | NA    | 0     |
| 58_vs_k141_40783           | [full]      | 3402  | No  | NA    | 0  | 2              | Not-determined  | Genome-fragment | NA    | 0     |
| 58_vs_k141_179529          | [full]      | 54041 | No  | NA    | 28 | 0              | High-quality    | High-quality    | NA    | 100   |
| 59_vs_k141_3111            | [full]      | 17795 | No  | NA    | 3  | 1              | Low-quality     | Genome-fragment | NA    | 46.32 |
| 58_vs_k141_58326           | [full]      | 6678  | No  | NA    | 0  | 6              | Not-determined  | Genome-fragment | NA    | 0     |
| 514_extracted_k141_81481   |             | 17796 | No  | NA    | 15 | 1              | Low-quality     | Genome-fragment | NA    | 49.98 |
| 58_vs_k141_127350          | [full]      | 1557  | No  | NA    | 0  | 2              | Not-determined  | Genome-fragment | NA    | 0     |
| 58_vs_k141_118803          | [full]      | 12207 | No  | NA    | 0  | 6              | Not-determined  | Genome-fragment | NA    | 0     |
| 58_vs_k141_101048          | [full]      | 1340  | No  | NA    | 0  | 1              | Not-determined  | Genome-fragment | NA    | 0     |
| 58_vs_k141_40800           | [full]      | 3755  | No  | NA    | 0  | 2              | Not-determined  | Genome-fragment | NA    | 0     |
| 58_vs_k141_118811          | [full]      | 1412  | No  | NA    | 0  | 0              | Not-determined  | Genome-fragment | NA    | 0     |
| 513_vs_53446               | [full]      | 17812 | No  | NA    | 4  | Low-quality    | Genome-fragment | NA              | 12.82 |       |
| 55_vs_k141_87139           | [full]      | 17849 | No  | NA    | 12 | 0              | Low-quality     | Genome-fragment | NA    | 40.22 |
| 58_vs_k141_187314          | [full]      | 1061  | No  | NA    | 0  | 0              | Not-determined  | Genome-fragment | NA    | 0     |
| 58_vs_k141_179584          | [full]      | 3083  | No  | NA    | 0  | 0              | Not-determined  | Genome-fragment | NA    | 0     |
| 58_vs_k141_92741           | [full]      | 1762  | No  | NA    | 0  | 1              | Not-determined  | Genome-fragment | NA    | 0     |
| 514_vs_k141_14158          | [0_partial] | 17862 | No  | NA    | 1  | 6              | Low-quality     | Genome-fragment | NA    | 12.01 |
| 58_vs_k141_127395          | [full]      | 2684  | No  | NA    | 2  | Not-determined | Genome-fragment | NA              | 0     |       |
| 58_vs_k141_66462           | [full]      | 1102  | No  | NA    | 0  | 0              | Not-determined  | Genome-fragment | NA    | 0     |
| 55_vs_k141_140805          | [full]      | 17866 | Yes | 15942 | 3  | 1              | Low-quality     | Genome-fragment | NA    | 19.36 |
| 58_vs_k141_7506            | [full]      | 1363  | No  | NA    | 0  | 2              | Not-determined  | Genome-fragment | NA    | 10.77 |
| 58_vs_k141_105257          | [full]      | 58244 | No  | NA    | 0  | High-quality   | Genome-fragment | NA              | 100   |       |
| 58_vs_k141_179605          | [full]      | 2512  | No  | NA    | 0  | 1              | Not-determined  | Genome-fragment | NA    | 0     |
| 513_vs_12239               | [full]      | 17878 | No  | NA    | 4  | 0              | Low-quality     | Genome-fragment | NA    | 45.62 |
| 58_vs_k141_11678           | [full]      | 2153  | No  | NA    | 0  | 0              | Not-determined  | Genome-fragment | NA    | 0     |
| 58_vs_k141_116675          | [0_partial] | 17882 | No  | NA    | 1  | 6              | Low-quality     | Genome-fragment | NA    | 20.63 |
| 58_extracted_k141_192008   |             | 17917 | No  | NA    | 4  | 3              | Low-quality     | Genome-fragment | NA    | 24.02 |
| 54_extracted_2677          |             | 17931 | No  | NA    | 4  | 1              | Low-quality     | Genome-fragment | NA    | 39.75 |
| 58_vs_k141_118881          | [full]      | 1864  | No  | NA    | 0  | 0              | Not-determined  | Genome-fragment | NA    | 0     |
| 55_vs_k141_127162          | [1_partial] | 17965 | No  | NA    | 1  | 2              | Low-quality     | Genome-fragment | NA    | 33.56 |
| 58_extracted_k141_160477   |             | 17976 | No  | NA    | 12 | 0              | Low-quality     | Genome-fragment | NA    | 48.79 |
| 510_extracted_20935        |             | 18010 | No  | NA    | 0  | 0              | Low-quality     | Genome-fragment | NA    | 11.3  |
| 58_vs_k141_153487          | [full]      | 1638  | No  | NA    | 0  | 2              | Not-determined  | Genome-fragment | NA    | 0     |
| 58_vs_k141_110338          | [full]      | 1451  | No  | NA    | 0  | 2              | Not-determined  | Genome-fragment | NA    | 0     |
| 58_vs_k141_110339          | [full]      | 1588  | No  | NA    | 0  | 0              | Not-determined  | Genome-fragment | NA    | 0     |
| 513_vs_112079              | [full]      | 18034 | No  | NA    | 0  | 3              | Low-quality     | Genome-fragment | NA    | 42.11 |
| 58_vs_k141_49038           | [full]      | 1121  | No  | NA    | 0  | 1              | Not-determined  | Genome-fragment | NA    | 0     |
| 55_vs_k141_9744            | [full]      | 38053 | No  | NA    | 0  | Low-quality    | Genome-fragment | NA              | 40.22 |       |
| 516_vs_127713              | [full]      | 18061 | No  | NA    | 16 | 0              | Low-quality     | Genome-fragment | NA    | 30.2  |
| 57_vs_60969                | [full]      | 18084 | No  | NA    | 17 | 1              | Low-quality     | Genome-fragment | NA    | 48.39 |
| 58_vs_k141_101130          | [full]      | 1220  | No  | NA    | 0  | 1              | Not-determined  | Genome-fragment | NA    | 0     |
| 58_vs_k141_118914          | [full]      | 3457  | No  | NA    | 0  | 2              | Not-determined  | Genome-fragment | NA    | 0     |
| 55_extracted_k141_54961    |             | 18116 | No  | NA    | 12 | 1              | Low-quality     | Genome-fragment | NA    | 44.86 |
| 516_extracted_06299        |             | 18135 | Yes | 13385 | 3  | 2              | Low-quality     | Genome-fragment | NA    | 7.76  |
| 58_vs_k141_53516           | [full]      | 4749  | No  | NA    | 0  | 2              | Not-determined  | Genome-fragment | NA    | 0     |
| 58_vs_k141_6107            | [full]      | 1718  | No  | NA    | 0  | 2              | Not-determined  | Genome-fragment | NA    | 0     |
| 58_vs_k141_37579           | [full]      | 2784  | No  | NA    | 0  | 2              | Not-determined  | Genome-fragment | NA    | 0     |
| 514_extracted_k141_7016    |             | 18139 | No  | NA    | 0  | Low-quality    | Genome-fragment | NA              | 46.62 |       |
| 511_extracted_k141_60471   |             | 18177 | No  | NA    | 11 | 0              | Low-quality     | Genome-fragment | NA    | 46.81 |
| 58_vs_k141_161860          | [full]      | 2041  | No  | NA    | 0  | 1              | Not-determined  | Genome-fragment | NA    | 0     |
| 513_extracted_97573        |             | 18182 | No  | NA    | 0  | Low-quality    | Genome-fragment | NA              | 29.98 |       |
| 58_vs_k141_179654          | [full]      | 2790  | No  | NA    | 0  | 1              | Not-determined  | Genome-fragment | NA    | 0     |
| 58_vs_k141_14445           | [full]      | 7651  | No  | NA    | 0  | 4              | Not-determined  | Genome-fragment | NA    | 0     |
| 514_vs_k141_4124           | [0_partial] | 18209 | No  | NA    | 1  | 5              | Low-quality     | Genome-fragment | NA    | 11.52 |
| 58_vs_k141_110400          | [full]      | 2322  | No  | NA    | 0  | 1              | Not-determined  | Genome-fragment | NA    | 0     |
| 58_vs_k141_75163           | [full]      | 3391  | No  | NA    | 0  | 2              | Not-determined  | Genome-fragment | NA    | 0     |
| 58_vs_k141_118957          | [full]      | 1743  | No  | NA    | 0  | 1              | Not-determined  | Genome-fragment | NA    | 0     |
| 58_vs_k141_40937           | [full]      | 1667  | No  | NA    | 0  | 2              | Not-determined  | Genome-fragment | NA    | 0     |



|                              |       |     |       |    |    |                |                 |       |       |
|------------------------------|-------|-----|-------|----|----|----------------|-----------------|-------|-------|
| 53_vs_k141_122179  0_partial | 18477 | No  | NA    | 3  | 7  | Low-quality    | Genome-fragment | 27.4  | 0     |
| 58_vs_k141_19705  full       | 1241  | No  | NA    | 0  | 1  | Not-determined | Genome-fragment | NA    | 0     |
| 52_vs_k141_11355  full       | 18479 | No  | NA    | 3  | 0  | Low-quality    | Genome-fragment | 41.17 | 0     |
| 517_extracted_k141_121637    | 18532 | No  | NA    | 4  | 0  | Low-quality    | Genome-fragment | 34.02 | 0     |
| 53_vs_k141_55137  full       | 18539 | No  | NA    | 15 | 0  | Low-quality    | Genome-fragment | 47.85 | 0     |
| 512_extracted_k141_125394    | 18541 | No  | NA    | 17 | 0  | Low-quality    | Genome-fragment | 44.31 | 0     |
| 53_extracted_k141_155330     | 18575 | No  | NA    | 3  | 0  | Low-quality    | Genome-fragment | 35.59 | 0     |
| 57_vs_56677  full            | 18577 | No  | NA    | 1  | 8  | Low-quality    | Genome-fragment | 12.49 | 0     |
| 516_vs_59367  0_partial      | 18590 | No  | NA    | 1  | 5  | Low-quality    | Genome-fragment | 12.85 | 0     |
| 58_vs_k141_75408  full       | 1742  | No  | NA    | 0  | 2  | Not-determined | Genome-fragment | NA    | 0     |
| 58_vs_k141_12444  full       | 3247  | No  | NA    | 0  | 2  | Not-determined | Genome-fragment | NA    | 0     |
| 58_vs_k141_6349  full        | 1973  | No  | NA    | 1  | 0  | Not-determined | Genome-fragment | NA    | 0     |
| 58_vs_k141_162069  full      | 6635  | No  | NA    | 0  | 2  | Not-determined | Genome-fragment | NA    | 0     |
| 58_vs_k141_119126  full      | 1324  | No  | NA    | 0  | 1  | Not-determined | Genome-fragment | NA    | 0     |
| 58_vs_k141_52990  full       | 1314  | No  | NA    | 0  | 1  | Not-determined | Genome-fragment | NA    | 0     |
| 58_vs_k141_153827  full      | 1077  | No  | NA    | 0  | 0  | Not-determined | Genome-fragment | NA    | 0     |
| 54_extracted_18103           | 18590 | No  | NA    | 10 | 0  | Low-quality    | Genome-fragment | 33.27 | 0     |
| 58_vs_k141_14096  full       | 9459  | No  | NA    | 0  | 5  | Not-determined | Genome-fragment | NA    | 0     |
| 58_vs_k141_12478  full       | 5365  | No  | NA    | 0  | 5  | Not-determined | Genome-fragment | NA    | 0     |
| 57_vs_31786  full            | 18618 | No  | NA    | 2  | 0  | Low-quality    | Genome-fragment | 45.08 | 0     |
| 58_vs_k141_145173  full      | 44625 | No  | NA    | 7  | 0  | High-quality   | High-quality    | 100   | 0     |
| 510_vs_13639  full           | 28519 | No  | NA    | 2  | 0  | Low-quality    | Genome-fragment | 12.11 | 0     |
| 58_vs_k141_58795  full       | 1578  | No  | NA    | 0  | 2  | Not-determined | Genome-fragment | NA    | 0     |
| 516_vs_47730  full           | 18624 | No  | NA    | 1  | 1  | Low-quality    | Genome-fragment | 11.49 | 0     |
| 58_vs_k141_187706  full      | 3751  | No  | NA    | 0  | 1  | Not-determined | Genome-fragment | NA    | 0     |
| 58_vs_k141_145196  full      | 2047  | No  | NA    | 0  | 3  | Not-determined | Genome-fragment | NA    | 0     |
| 516_vs_6545  full            | 18627 | No  | NA    | 3  | 2  | Low-quality    | Genome-fragment | 44.73 | 0     |
| 510_vs_36174  full           | 18631 | No  | NA    | 13 | 1  | Low-quality    | Genome-fragment | 30.76 | 0     |
| 58_vs_k141_1162121  full     | 2852  | No  | NA    | 0  | 0  | Not-determined | Genome-fragment | NA    | 0     |
| 58_vs_k141_41122  full       | 2397  | No  | NA    | 0  | 1  | Not-determined | Genome-fragment | NA    | 0     |
| 58_vs_k141_171234  full      | 1877  | No  | NA    | 0  | 1  | Not-determined | Genome-fragment | NA    | 0     |
| 516_vs_38638  full           | 18638 | No  | NA    | 0  | 0  | Low-quality    | Genome-fragment | 23.36 | 0     |
| 58_vs_k141_162160  full      | 1159  | No  | NA    | 0  | 1  | Not-determined | Genome-fragment | NA    | 0     |
| 53_vs_k141_99701  0_partial  | 18639 | No  | NA    | 1  | 11 | Low-quality    | Genome-fragment | 14.28 | 0     |
| 58_vs_k141_41138  full       | 1265  | No  | NA    | 0  | 0  | Not-determined | Genome-fragment | NA    | 0     |
| 58_vs_k141_119138  full      | 1419  | No  | NA    | 0  | 1  | Not-determined | Genome-fragment | NA    | 0     |
| 58_vs_k141_110692  full      | 19724 | No  | NA    | 17 | 0  | Medium-quality | Genome-fragment | 69.42 | 0     |
| 58_vs_k141_205529  full      | 3279  | No  | NA    | 0  | 2  | Not-determined | Genome-fragment | NA    | 0     |
| 58_vs_k141_66816  full       | 2175  | No  | NA    | 0  | 2  | Not-determined | Genome-fragment | NA    | 0     |
| 58_vs_k141_127852  full      | 8379  | No  | NA    | 0  | 3  | Not-determined | Genome-fragment | NA    | 0     |
| 511_vs_k141_1212  full       | 18692 | No  | NA    | 2  | 2  | Low-quality    | Genome-fragment | 43.66 | 0     |
| 517_vs_k141_17455  full      | 18697 | No  | NA    | 1  | 7  | Low-quality    | Genome-fragment | 17.56 | 0     |
| 516_extracted_35820          | 18707 | Yes | 12789 | 6  | 5  | Low-quality    | Genome-fragment | 20.63 | 31.64 |
| 512_vs_k141_59958  0_partial | 18745 | No  | NA    | 2  | 8  | Low-quality    | Genome-fragment | 32.4  | 0     |
| 57_vs_4208  full             | 18792 | No  | NA    | 1  | 4  | Low-quality    | Genome-fragment | 10.39 | 0     |
| 58_vs_k141_186923  full      | 18823 | No  | NA    | 3  | 0  | Low-quality    | Genome-fragment | 16.02 | 0     |
| 59_extracted_k141_89614      | 18833 | No  | NA    | 1  | 0  | Low-quality    | Genome-fragment | 11.82 | 0     |
| 58_vs_k141_41180  full       | 2472  | No  | NA    | 0  | 0  | Not-determined | Genome-fragment | NA    | 0     |
| 58_vs_k141_20571  full       | 18872 | No  | NA    | 12 | 0  | Low-quality    | Genome-fragment | 43.98 | 0     |
| 58_vs_k141_145294  full      | 2169  | No  | NA    | 0  | 1  | Not-determined | Genome-fragment | NA    | 0     |
| 58_vs_k141_153950  full      | 17117 | No  | NA    | 0  | 5  | Not-determined | Genome-fragment | NA    | 0     |
| 58_vs_k141_58913  full       | 4095  | No  | NA    | 0  | 2  | Not-determined | Genome-fragment | NA    | 0     |
| 58_vs_k141_41204  full       | 2627  | No  | NA    | 0  | 0  | Not-determined | Genome-fragment | NA    | 0     |
| 513_extracted_141129         | 18877 | No  | NA    | 0  | 11 | Low-quality    | Genome-fragment | 4.37  | 0     |
| 58_vs_k141_197510  full      | 2129  | No  | NA    | 0  | 0  | Not-determined | Genome-fragment | NA    | 0     |
| 55_vs_k141_18480  full       | 18888 | No  | NA    | 3  | 0  | Low-quality    | Genome-fragment | 41.84 | 0     |
| 55_vs_k141_85533  full       | 18905 | No  | NA    | 2  | 0  | Low-quality    | Genome-fragment | 45.77 | 0     |
| 58_vs_k141_12627  full       | 1759  | No  | NA    | 0  | 1  | Not-determined | Genome-fragment | NA    | 0     |
| 58_vs_k141_153967  full      | 8965  | No  | NA    | 0  | 0  | Not-determined | Genome-fragment | NA    | 0     |
| 58_vs_k141_58944  full       | 1820  | No  | NA    | 0  | 0  | Not-determined | Genome-fragment | NA    | 0     |
| 58_vs_k141_205624  full      | 1397  | No  | NA    | 0  | 0  | Not-determined | Genome-fragment | NA    | 0     |
| 58_vs_k141_171591  full      | 1369  | No  | NA    | 0  | 1  | Not-determined | Genome-fragment | NA    | 0     |
| 58_vs_k141_145348  full      | 1764  | No  | NA    | 0  | 1  | Not-determined | Genome-fragment | NA    | 0     |
| 55_vs_k141_44949  full       | 18944 | No  | NA    | 5  | 0  | Low-quality    | Genome-fragment | 45.79 | 0     |
| 58_vs_k141_14886  full       | 1187  | No  | NA    | 1  | 1  | Not-determined | Genome-fragment | NA    | 0     |
| 54_vs_VIRSorter_8597_cat_2   | 18952 | No  | NA    | 4  | 1  | Low-quality    | Genome-fragment | 41.88 | 0     |
| 517_vs_k141_125155  full     | 18961 | Yes | 15066 | 2  | 2  | Low-quality    | Genome-fragment | 20.64 | 20.54 |
| 58_vs_k141_162206  full      | 3273  | No  | NA    | 0  | 2  | Not-determined | Genome-fragment | NA    | 0     |
| 510_vs_k141_91022  full      | 1212  | No  | NA    | 0  | 1  | Not-determined | Genome-fragment | NA    | 0     |
| 58_vs_k141_75628  full       | 1419  | No  | NA    | 0  | 1  | Not-determined | Genome-fragment | NA    | 0     |
| 58_vs_k141_154026  full      | 1371  | No  | NA    | 0  | 0  | Not-determined | Genome-fragment | NA    | 0     |
| 58_vs_k141_93216  full       | 3494  | No  | NA    | 0  | 2  | Not-determined | Genome-fragment | NA    | 0     |
| 59_vs_k141_66977  full       | 18962 | No  | NA    | 3  | 2  | Low-quality    | Genome-fragment | 27.87 | 0     |
| 58_vs_k141_197610  full      | 2488  | No  | NA    | 0  | 1  | Not-determined | Genome-fragment | NA    | 0     |
| 58_vs_k141_162241  full      | 1028  | No  | NA    | 0  | 0  | Not-determined | Genome-fragment | NA    | 0     |
| 516_vs_44268  full           | 19047 | No  | NA    | 14 | 1  | Low-quality    | Genome-fragment | 47.49 | 0     |
| 58_vs_k141_101652  full      | 3707  | No  | NA    | 0  | 2  | Not-determined | Genome-fragment | NA    | 0     |
| 516_extracted_165886         | 19086 | No  | NA    | 1  | 3  | Low-quality    | Genome-fragment | 1.62  | 0     |
| 513_vs_124613  full          | 19105 | Yes | 5749  | 3  | 9  | Low-quality    | Genome-fragment | 13.86 | 69.91 |
| 55_vs_k141_15478  0_partial  | 19121 | No  | NA    | 3  | 8  | Low-quality    | Genome-fragment | 36.39 | 0     |
| 58_vs_k141_159021  full      | 2132  | No  | NA    | 0  | 3  | Not-determined | Genome-fragment | NA    | 0     |
| 513_vs_130877  full          | 19134 | No  | NA    | 12 | 0  | Low-quality    | Genome-fragment | 47.89 | 0     |
| 58_vs_k141_162254  full      | 2478  | No  | NA    | 0  | 0  | Not-determined | Genome-fragment | NA    | 0     |
| 58_vs_k141_171475  full      | 4065  | No  | NA    | 0  | 1  | Not-determined | Genome-fragment | NA    | 0     |
| 58_vs_k141_119372  full      | 1578  | No  | NA    | 0  | 1  | Not-determined | Genome-fragment | NA    | 0     |
| 58_vs_k141_6653  full        | 2816  | No  | NA    | 0  | 1  | Not-determined | Genome-fragment | NA    | 0     |
| 58_vs_k141_101713  full      | 1416  | No  | NA    | 0  | 0  | Not-determined | Genome-fragment | NA    | 0     |
| 513_extracted_523            | 19157 | No  | NA    | 0  | 11 | Low-quality    | Genome-fragment | 11.94 | 0     |
| 58_vs_k141_145459  full      | 2057  | No  | NA    | 0  | 1  | Not-determined | Genome-fragment | NA    | 0     |
| 52_vs_k141_18431  full       | 19192 | No  | NA    | 3  | 1  | Low-quality    | Genome-fragment | 41.78 | 0     |
| 58_vs_k141_24146  full       | 1594  | No  | NA    | 0  | 3  | Not-determined | Genome-fragment | NA    | 0     |
| 53_vs_k141_15904  full       | 19198 | Yes | 2529  | 12 | 0  | Low-quality    | Genome-fragment | 4.39  | 86.83 |
| 55_vs_k141_9971  full        | 19232 | No  | NA    | 1  | 0  | Low-quality    | Genome-fragment | 43.23 | 0     |
| 58_extracted_k141_130106     | 19245 | No  | NA    | 0  | 14 | Low-quality    | Genome-fragment | 2.6   | 0     |
| 58_vs_k141_145498  full      | 1630  | No  | NA    | 1  | 0  | Not-determined | Genome-fragment | NA    | 0     |
| 59_extracted_k141_81703      | 19266 | No  | NA    | 2  | 1  | Low-quality    | Genome-fragment | 24    | 0     |
| 54_vs_VIRSorter_24856-cat_2  | 19303 | No  | NA    | 11 | 0  | Low-quality    | Genome-fragment | 48.17 | 0     |
| 58_vs_k141_145505  full      | 1639  | No  | NA    | 0  | 1  | Not-determined | Genome-fragment | NA    | 0     |
| 58_vs_k141_93268  full       | 1555  | No  | NA    | 0  | 0  | Not-determined | Genome-fragment | NA    | 0     |
| 516_vs_168934  full          | 19416 | No  | NA    | 11 | 1  | Low-quality    | Genome-fragment | 45.83 | 0     |
| 58_vs_k141_101757  full      | 1426  | No  | NA    | 0  | 0  | Not-determined | Genome-fragment | NA    | 0     |
| 58_vs_k141_145507  full      | 7962  | No  | NA    | 0  | 0  | Not-determined | Genome-fragment | NA    | 0     |
| 58_vs_k141_154160  full      | 1415  | No  | NA    | 0  | 0  | Not-determined | Genome-fragment | NA    | 0     |
| 512_vs_k141_57348  full      | 19455 | No  | NA    | 14 | 0  | Low-quality    | Genome-fragment | 28.15 | 0     |
| 59_vs_k141_12413  full       | 19480 | No  | NA    | 2  | 1  | Low-quality    | Genome-fragment | 41.59 | 0     |
| 58_vs_k141_171570  full      | 1819  | No  | NA    | 0  | 2  | Not-determined | Genome-fragment | NA    | 0     |
| 517_extracted_k141_1262      | 19499 | No  | NA    | 9  | 0  | Low-quality    | Genome-fragment | 22.74 | 0     |
| 58_vs_k141_124782  0_partial | 19499 | Yes | 9536  | 2  | 3  | Low-quality    | Genome-fragment | 18.28 | 51.09 |
| 58_vs_k141_191594  full      | 19567 | No  | NA    | 0  | 0  | Low-quality    | Genome-fragment | 46.03 | 0     |
| 58_vs_k141_49370  full       | 3734  | No  | NA    | 0  | 2  | Not-determined | Genome-fragment | NA    | 0     |
| 58_vs_k141_197736  full      | 7497  | No  | NA    | 0  | 3  | Not-determined | Genome-fragment | NA    | 0     |
| 58_extracted_k141_206579     | 19599 | No  | NA    | 11 | 0  | Low-quality    | Genome-fragment | 31.62 | 0     |
| 57_vs_75727  full            | 19606 | No  | NA    | 1  | 1  | Low-quality    | Genome-fragment | 17.71 | 0     |
| 513_extracted_134560         | 19610 | No  | NA    | 11 | 0  | Low-quality    | Genome-fragment | 29.21 | 0     |
| 58_vs_k141_108212  full      | 1887  | No  | NA    | 0  | 0  | Not-determined | Genome-fragment | NA    | 0     |
| 58_vs_k141_110895  full      | 2834  | No  | NA    | 0  | 2  | Not-determined | Genome-fragment | NA    | 0     |
| 514_vs_k141_162405  full     | 1814  | No  | NA    | 0  | 1  | Not-determined | Genome-fragment | NA    | 0     |
| 514_vs_k141_8705  full       | 18651 | No  | NA    | 2  | 0  | Low-quality    | Genome-fragment | 43.31 | 0     |
| 57_vs_38936  full            | 18664 | No  | NA    | 0  | 0  | Low-quality    | Genome-fragment | 33.65 | 0     |
| 58_vs_k141_6765  full        | 1755  | No  | NA    | 0  | 0  | Not-determined | Genome-fragment | NA    | 0     |
| 510_vs_109744  full          | 19691 | No  | NA    | 11 | 0  | Low-quality    | Genome-fragment | 43.18 | 0     |
| 58_vs_k141_101857  full      | 1666  | No  | NA    | 0  | 1  | Not-determined | Genome-fragment | NA    | 0     |
| 58_vs_k141_32847  full       | 5480  | No  | NA    | 0  | 0  | Not-determined | Genome-fragment | NA    | 0     |
| 58_vs_k141_67144  full       | 3562  | No  | NA    | 0  | 3  | Not-determined | Genome-fragment | NA    | 0     |
| 58_vs_k141_04023  full       | 1971  | No  | NA    | 0  | 1  | Not-determined | Genome-fragment | NA    | 0     |
| 58_vs_k141_128171  full      | 1620  | No  | NA    | 0  | 1  | Not-determined | Genome-fragment | NA    | 0     |
| 512_extracted_k141_160747    | 19717 | No  | NA    | 11 | 0  | Low-quality    | Genome-fragment | 45.89 | 0     |
| 58_vs_k141_59234  full       | 1608  | No  | NA    | 0  | 0  | Not-determined | Genome-fragment | NA    | 0     |
| 58_vs_k141_32889  full       | 1180  | No  | NA    | 0  | 2  | Not-determined | Genome-fragment | NA    | 0     |
| 58_vs_k141_59235  full       | 2600  | No  | NA    | 0  | 2  | Not-determined | Genome-fragment | NA    | 0     |
| 512_vs_k141_15213  0_partial | 19719 | No  | NA    | 1  | 11 | Low-quality    | Genome-fragment | 20.07 | 0     |
| 55_vs_k141_100774  full      | 19735 | No  | NA    | 0  | 0  | Low-quality    | Genome-fragment | 6.25  | 0     |
| 58_vs_k141_24317  full       | 1631  | No  | NA    | 0  | 1  | Not-determined | Genome-fragment | NA    | 0     |
| 58_vs_k141_145654  full      | 3093  | No  | NA    | 0  | 0  | Not-determined | Genome-fragment | NA    | 0     |
| 58_vs_k141_154131  full      | 3882  | No  | NA    | 17 | 0  | High-quality   | High-quality    | 99.09 | 0     |
| 512_extracted_k141_170419    | 19740 | No  | NA    | 4  | 1  | Low-quality    | Genome-fragment | 18.17 | 0     |
| 54_extracted_16270           | 19762 | No  | NA    | 5  | 0  | Low-quality    | Genome-fragment | 11.14 | 0     |
| 58_vs_k141_75902  full       | 1315  | No  | NA    | 0  | 0  | Not-determined | Genome-fragment | NA    | 0     |
| 58_vs_k141_110920  full      | 1325  | No  | NA    | 0  | 0  | Not-determined | Genome-fragment | NA    | 0     |
| 58_vs_k141_15121  full       | 1676  | No  | NA    | 0  | 1  | Not-determined | Genome-fragment | NA    | 0     |
| 58_vs_k141_15123  full       | 1105  |     |       |    |    |                |                 |       |       |



|                           |           |       |     |       |    |    |                |                 |    |       |       |
|---------------------------|-----------|-------|-----|-------|----|----|----------------|-----------------|----|-------|-------|
| 58_vs_k141_32959          | full      | 2276  | No  | NA    | 0  | 1  | Not-determined | Genome-fragment | NA | 0     | 0     |
| 58_vs_k141_33490          | full      | 2155  | No  | NA    | 0  | 1  | Not-determined | Genome-fragment | NA | 0     | 0     |
| 55_vs_k141_20434          | full      | 20124 | No  | NA    | 0  | 8  | Low-quality    | Genome-fragment | NA | 46.06 | 0     |
| 58_vs_k141_128343         | full      | 1312  | No  | NA    | 0  | 0  | Not-determined | Genome-fragment | NA | 0     | 0     |
| 58_vs_k141_39323          | full      | 2202  | No  | NA    | 0  | 1  | Not-determined | Genome-fragment | NA | 0     | 0     |
| 58_vs_k141_205967         | full      | 1499  | No  | NA    | 3  | 0  | Not-determined | Genome-fragment | NA | 0     | 0     |
| 58_vs_k141_145838         | full      | 2171  | No  | NA    | 0  | 2  | Not-determined | Genome-fragment | NA | 0     | 0     |
| 516_vs_38491              | full      | 20130 | No  | NA    | 1  | 10 | Low-quality    | Genome-fragment | NA | 12.44 | 0     |
| 55_vs_k141_111861         | 0_partial | 20133 | Yes | 14764 | 7  | 4  | Low-quality    | Genome-fragment | NA | 19.89 | 26.67 |
| 513_extracted_77087       |           | 20179 | No  | NA    | 7  | 0  | Low-quality    | Genome-fragment | NA | 18.49 | 0     |
| 55_vs_k141_51909          | full      | 20238 | No  | NA    | 1  | 4  | Low-quality    | Genome-fragment | NA | 44.91 | 0     |
| 58_vs_k141_205993         | full      | 1291  | No  | NA    | 0  | 0  | Not-determined | Genome-fragment | NA | 0     | 0     |
| 511_vs_k141_64382         | full      | 20262 | No  | NA    | 6  | 0  | Low-quality    | Genome-fragment | NA | 37.62 | 0     |
| 58_vs_k141_142146         |           | 20267 | No  | NA    | 2  | 1  | Low-quality    | Genome-fragment | NA | 8.6   | 0     |
| 58_vs_k141_171534         | full      | 2479  | No  | NA    | 0  | 1  | Not-determined | Genome-fragment | NA | 0     | 0     |
| 513_extracted_104626      |           | 20250 | No  | NA    | 0  | 1  | Low-quality    | Genome-fragment | NA | 37.97 | 0     |
| 58_vs_k141_119622         | full      | 1768  | No  | NA    | 0  | 2  | Not-determined | Genome-fragment | NA | 0     | 0     |
| 55_vs_k141_77499          | full      | 20296 | No  | NA    | 0  | 9  | Low-quality    | Genome-fragment | NA | 7.85  | 0     |
| 512_vs_k141_177540        | full      | 20371 | No  | NA    | 4  | 0  | Low-quality    | Genome-fragment | NA | 43.26 | 0     |
| 58_vs_k141_162691         | full      | 2029  | No  | NA    | 0  | 0  | Not-determined | Genome-fragment | NA | 0     | 0     |
| 58_vs_k141_102137         | full      | 3269  | No  | NA    | 0  | 3  | Not-determined | Genome-fragment | NA | 0     | 0     |
| 58_vs_k141_188167         | full      | 8366  | No  | NA    | 0  | 5  | Not-determined | Genome-fragment | NA | 0     | 0     |
| 55_extracted_k141_70522   |           | 20376 | No  | NA    | 0  | 2  | Low-quality    | Genome-fragment | NA | 20.53 | 0     |
| 512_vs_k141_88221         | 0_partial | 20393 | Yes | 12347 | 5  | 6  | Low-quality    | Genome-fragment | NA | 16.36 | 39.45 |
| 53_vs_k141_45342          | full      | 20450 | No  | NA    | 0  | 14 | Low-quality    | Genome-fragment | NA | 11.52 | 0     |
| 58_vs_k141_119600         | full      | 1666  | No  | NA    | 0  | 1  | Not-determined | Genome-fragment | NA | 0     | 0     |
| 58_vs_k141_41513          | full      | 1153  | No  | NA    | 0  | 0  | Not-determined | Genome-fragment | NA | 0     | 0     |
| 58_vs_k141_6991           | full      | 3540  | No  | NA    | 0  | 1  | Not-determined | Genome-fragment | NA | 0     | 0     |
| 58_vs_k141_102151         | full      | 4518  | No  | NA    | 0  | 0  | Not-determined | Genome-fragment | NA | 0     | 0     |
| 58_vs_k141_145941         | full      | 2143  | No  | NA    | 0  | 3  | Not-determined | Genome-fragment | NA | 0     | 0     |
| 58_vs_k141_162753         | full      | 2720  | No  | NA    | 0  | 1  | Not-determined | Genome-fragment | NA | 0     | 0     |
| 58_vs_k141_128388         | full      | 2274  | No  | NA    | 0  | 3  | Not-determined | Genome-fragment | NA | 0     | 0     |
| 513_vs_2497               | full      | 20457 | No  | NA    | 8  | 1  | Low-quality    | Genome-fragment | NA | 12.26 | 0     |
| 58_vs_k141_128411         | full      | 2592  | No  | NA    | 0  | 0  | Not-determined | Genome-fragment | NA | 0     | 0     |
| 515_extracted_11650       |           | 20475 | No  | NA    | 3  | 0  | Low-quality    | Genome-fragment | NA | 21.61 | 0     |
| 513_vs_3448               | full      | 20620 | No  | NA    | 1  | 1  | Low-quality    | Genome-fragment | NA | 13.95 | 0     |
| 58_vs_k141_93671          | full      | 2517  | No  | NA    | 0  | 1  | Not-determined | Genome-fragment | NA | 0     | 0     |
| 58_vs_k141_158105         | full      | 1323  | No  | NA    | 0  | 1  | Not-determined | Genome-fragment | NA | 0     | 0     |
| 513_extracted_k141_311839 |           | 20636 | No  | NA    | 10 | 10 | Low-quality    | Genome-fragment | NA | 13.81 | 0     |
| 58_vs_k141_7053           | full      | 1956  | No  | NA    | 0  | 2  | Not-determined | Genome-fragment | NA | 0     | 0     |
| 58_vs_k141_49803          | full      | 8704  | No  | NA    | 0  | 3  | Not-determined | Genome-fragment | NA | 0     | 0     |
| 58_vs_k141_41588          | full      | 5880  | No  | NA    | 0  | 2  | Not-determined | Genome-fragment | NA | 0     | 0     |
| 513_extracted_102684      |           | 20665 | No  | NA    | 7  | 1  | Low-quality    | Genome-fragment | NA | 34.12 | 0     |
| 58_vs_k141_102285         | full      | 2198  | No  | NA    | 0  | 0  | Not-determined | Genome-fragment | NA | 0     | 0     |
| 58_vs_k141_180734         | full      | 1138  | No  | NA    | 0  | 2  | Not-determined | Genome-fragment | NA | 0     | 0     |
| 58_vs_k141_24602          | full      | 1884  | No  | NA    | 0  | 1  | Not-determined | Genome-fragment | NA | 0     | 0     |
| 55_extracted_k141_77264   |           | 20728 | No  | NA    | 17 | 0  | Low-quality    | Genome-fragment | NA | 49.55 | 0     |
| 513_vs_53416              | 0_partial | 20730 | No  | NA    | 0  | 8  | Low-quality    | Genome-fragment | NA | 9.64  | 0     |
| 58_vs_k141_62862          | full      | 10280 | No  | NA    | 0  | 1  | Not-determined | Genome-fragment | NA | 0     | 0     |
| 58_vs_k141_206117         | full      | 2062  | No  | NA    | 0  | 0  | Not-determined | Genome-fragment | NA | 0     | 0     |
| 58_vs_k141_67451          | full      | 1231  | No  | NA    | 0  | 1  | Not-determined | Genome-fragment | NA | 0     | 0     |
| 58_vs_k141_136922         | full      | 20446 | No  | NA    | 14 | 3  | Low-quality    | Genome-fragment | NA | 89.59 | 0     |
| 52_vs_k141_14070          | full      | 20777 | No  | NA    | 5  | 3  | Low-quality    | Genome-fragment | NA | 34.94 | 0     |
| 57_vs_47104               | full      | 20799 | No  | NA    | 2  | 3  | Low-quality    | Genome-fragment | NA | 12.62 | 0     |
| 514_vs_k141_82571         | full      | 20801 | No  | NA    | 0  | 0  | Low-quality    | Genome-fragment | NA | 48.69 | 0     |
| 58_vs_k141_158163         | full      | 1591  | No  | NA    | 0  | 1  | Not-determined | Genome-fragment | NA | 0     | 0     |
| 511_vs_k141_20005         | full      | 20823 | No  | NA    | 10 | 0  | Low-quality    | Genome-fragment | NA | 25.75 | 0     |
| 514_vs_k141_32295         | 0_partial | 20862 | Yes | 18048 | 2  | 4  | Low-quality    | Genome-fragment | NA | 11.39 | 13.49 |
| 58_vs_k141_24647          | full      | 1534  | No  | NA    | 0  | 0  | Not-determined | Genome-fragment | NA | 0     | 0     |
| 58_vs_k141_162903         | full      | 3269  | No  | NA    | 0  | 3  | Not-determined | Genome-fragment | NA | 0     | 0     |
| 58_vs_k141_7131           | full      | 3048  | No  | NA    | 0  | 0  | Not-determined | Genome-fragment | NA | 0     | 0     |
| 511_vs_k141_20627         | full      | 20878 | No  | NA    | 0  | 1  | Low-quality    | Genome-fragment | NA | 48.36 | 0     |
| 53_vs_k141_121413         | full      | 20993 | No  | NA    | 6  | 0  | Low-quality    | Genome-fragment | NA | 10.3  | 0     |
| 58_vs_k141_206149         | full      | 2078  | No  | NA    | 0  | 0  | Not-determined | Genome-fragment | NA | 0     | 0     |
| 58_vs_k141_162933         | full      | 1655  | No  | NA    | 0  | 0  | Not-determined | Genome-fragment | NA | 0     | 0     |
| 58_vs_k141_111369         | full      | 1674  | No  | NA    | 0  | 0  | Not-determined | Genome-fragment | NA | 0     | 0     |
| 58_vs_k141_206155         | full      | 2795  | No  | NA    | 0  | 2  | Not-determined | Genome-fragment | NA | 0     | 0     |
| 58_vs_k141_7135           | full      | 4149  | No  | NA    | 0  | 5  | Not-determined | Genome-fragment | NA | 0     | 0     |
| 58_vs_k141_40765          | full      | 20994 | No  | NA    | 19 | 0  | Low-quality    | Genome-fragment | NA | 46.75 | 0     |
| 53_vs_k141_82389          | full      | 20996 | No  | NA    | 0  | 1  | Low-quality    | Genome-fragment | NA | 47.72 | 0     |
| 58_vs_k141_172171         | full      | 4202  | No  | NA    | 0  | 1  | Not-determined | Genome-fragment | NA | 0     | 0     |
| 58_vs_k141_17471          | full      | 1774  | No  | NA    | 0  | 2  | Not-determined | Genome-fragment | NA | 0     | 0     |
| 58_vs_k141_154252         | full      | 2929  | No  | NA    | 0  | 0  | Not-determined | Genome-fragment | NA | 0     | 0     |
| 53_vs_k141_6553           | full      | 21020 | No  | NA    | 5  | 4  | Low-quality    | Genome-fragment | NA | 25.34 | 0     |
| 514_vs_k141_22491         | full      | 21044 | Yes | 14161 | 7  | 1  | Low-quality    | Genome-fragment | NA | 18.36 | 32.71 |
| 513_vs_139426             | 0_partial | 21072 | No  | NA    | 1  | 0  | Low-quality    | Genome-fragment | NA | 37.26 | 0     |
| 58_vs_k141_146117         | full      | 2486  | No  | NA    | 0  | 0  | Not-determined | Genome-fragment | NA | 0     | 0     |
| 510_extracted_43345       |           | 21078 | No  | NA    | 0  | 5  | Low-quality    | Genome-fragment | NA | 12.42 | 0     |
| 516_extracted_118692      |           | 21108 | No  | NA    | 4  | 4  | Low-quality    | Genome-fragment | NA | 11.45 | 0     |
| 512_vs_k141_23569         | 0_partial | 21127 | No  | NA    | 1  | 14 | Low-quality    | Genome-fragment | NA | 11.31 | 0     |
| 510_vs_44784              | full      | 21129 | No  | NA    | 2  | 1  | Low-quality    | Genome-fragment | NA | 39.74 | 0     |
| 58_vs_k141_13282          | full      | 3570  | No  | NA    | 0  | 1  | Not-determined | Genome-fragment | NA | 0     | 0     |
| 517_extracted_k141_112285 |           | 21168 | No  | NA    | 1  | 5  | Low-quality    | Genome-fragment | NA | 3.4   | 0     |
| 510_extracted_74281       |           | 21178 | No  | NA    | 0  | 14 | Low-quality    | Genome-fragment | NA | 3.57  | 0     |
| 513_extracted_73727       |           | 21187 | No  | NA    | 0  | 0  | Low-quality    | Genome-fragment | NA | 15.78 | 0     |
| 53_vs_k141_57692          | full      | 21213 | No  | NA    | 13 | 0  | Low-quality    | Genome-fragment | NA | 45.87 | 0     |
| 58_vs_k141_163020         | full      | 1124  | No  | NA    | 0  | 1  | Not-determined | Genome-fragment | NA | 0     | 0     |
| 55_vs_k141_122206         | full      | 21254 | No  | NA    | 2  | 6  | Low-quality    | Genome-fragment | NA | 25.86 | 0     |
| 57_extracted_54564        |           | 21259 | No  | NA    | 0  | 2  | Low-quality    | Genome-fragment | NA | 47.85 | 0     |
| 511_vs_k141_1269          | full      | 21318 | No  | NA    | 6  | 0  | Low-quality    | Genome-fragment | NA | 16.24 | 0     |
| 58_vs_k141_59700          | full      | 2951  | No  | NA    | 0  | 1  | Not-determined | Genome-fragment | NA | 0     | 0     |
| 58_extracted_k141_179504  |           | 21361 | No  | NA    | 0  | 0  | Low-quality    | Genome-fragment | NA | 48.36 | 0     |
| 58_vs_k141_102438         | full      | 1336  | No  | NA    | 0  | 1  | Not-determined | Genome-fragment | NA | 0     | 0     |
| 516_extracted_153608      |           | 21362 | No  | NA    | 1  | 12 | Low-quality    | Genome-fragment | NA | 12.72 | 0     |
| 58_vs_k141_24827          | full      | 1302  | No  | NA    | 0  | 1  | Not-determined | Genome-fragment | NA | 0     | 0     |
| 513_vs_58880              | 0_partial | 21425 | No  | NA    | 1  | 7  | Low-quality    | Genome-fragment | NA | 24.05 | 0     |
| 58_vs_k141_206332         | full      | 2121  | No  | NA    | 0  | 1  | Not-determined | Genome-fragment | NA | 0     | 0     |
| 58_vs_k141_128654         | full      | 1509  | No  | NA    | 0  | 0  | Not-determined | Genome-fragment | NA | 0     | 0     |
| 58_vs_k141_158411         | full      | 3810  | No  | NA    | 0  | 1  | Not-determined | Genome-fragment | NA | 0     | 0     |
| 56_vs_k141_5186           | full      | 21428 | No  | NA    | 14 | 1  | Low-quality    | Genome-fragment | NA | 47.74 | 0     |
| 517_extracted_k141_38776  |           | 21476 | Yes | 11474 | 2  | 2  | Low-quality    | Genome-fragment | NA | 20.76 | 46.57 |
| 58_vs_k141_131010         | full      | 1235  | No  | NA    | 0  | 1  | Not-determined | Genome-fragment | NA | 0     | 0     |
| 58_vs_k141_15675          | full      | 1001  | No  | NA    | 0  | 1  | Not-determined | Genome-fragment | NA | 0     | 0     |
| 516_vs_79597              | full      | 21484 | No  | NA    | 5  | 0  | Low-quality    | Genome-fragment | NA | 12.26 | 0     |
| 58_vs_k141_50077          | full      | 1549  | No  | NA    | 0  | 1  | Not-determined | Genome-fragment | NA | 0     | 0     |
| 58_vs_k141_172378         | full      | 1558  | No  | NA    | 0  | 1  | Not-determined | Genome-fragment | NA | 0     | 0     |
| 57_vs_64876               | full      | 21495 | No  | NA    | 8  | 0  | Low-quality    | Genome-fragment | NA | 42.06 | 0     |
| 58_vs_k141_128696         | full      | 6695  | No  | NA    | 0  | 3  | Not-determined | Genome-fragment | NA | 0     | 0     |
| 514_extracted_k141_3342   |           | 21507 | No  | NA    | 0  | 2  | Low-quality    | Genome-fragment | NA | 34.2  | 0     |
| 58_vs_k141_120018         | full      | 4230  | No  | NA    | 0  | 5  | Not-determined | Genome-fragment | NA | 0     | 0     |
| 58_vs_k141_13485          | full      | 2033  | No  | NA    | 0  | 1  | Not-determined | Genome-fragment | NA | 13.57 | 0     |
| 513_extracted_27468       |           | 21554 | No  | NA    | 1  | 1  | Low-quality    | Genome-fragment | NA | 0     | 0     |
| 55_vs_k141_122923         | 0_partial | 21608 | Yes | 16186 | 3  | 3  | Low-quality    | Genome-fragment | NA | 30.94 | 25.09 |
| 53_vs_k141_12256          | full      | 21736 | No  | NA    | 1  | 8  | Low-quality    | Genome-fragment | NA | 42.45 | 0     |
| 58_vs_k141_23505          | full      | 1106  | No  | NA    | 0  | 0  | Not-determined | Genome-fragment | NA | 0     | 0     |
| 58_vs_k141_172437         | full      | 2869  | No  | NA    | 0  | 0  | Not-determined | Genome-fragment | NA | 0     | 0     |
| 58_vs_k141_33514          | full      | 2201  | No  | NA    | 0  | 2  | Not-determined | Genome-fragment | NA | 0     | 0     |
| 58_vs_k141_206451         | full      | 2166  | No  | NA    | 0  | 2  | Not-determined | Genome-fragment | NA | 0     | 0     |
| 58_vs_k141_131085         | full      | 8546  | No  | NA    | 0  | 1  | Not-determined | Genome-fragment | NA | 0     | 0     |
| 58_vs_k141_50180          | full      | 2872  | No  | NA    | 0  | 1  | Not-determined | Genome-fragment | NA | 0     | 0     |
| 58_vs_k141_100346         | 0_partial | 21807 | No  | NA    | 1  | 8  | Low-quality    | Genome-fragment | NA | 10.19 | 0     |
| 58_vs_k141_137288         | full      | 1056  | No  | NA    | 0  | 1  | Not-determined | Genome-fragment | NA | 0     | 0     |
| 58_vs_k141_33554          | full      | 3135  | No  | NA    | 0  | 3  | Not-determined | Genome-fragment | NA | 0     | 0     |
| 58_extracted_k141_96559   |           | 21821 | No  | NA    | 1  | 4  | Low-quality    | Genome-fragment | NA | 26.12 | 0     |
| 58_vs_k141_137305         | full      | 1685  | No  | NA    | 0  | 1  | Not-determined | Genome-fragment |    |       |       |



|                              |       |     |       |      |    |                |                 |                 |       |       |
|------------------------------|-------|-----|-------|------|----|----------------|-----------------|-----------------|-------|-------|
| S5_extracted_k141_57448      | 22326 | No  | NA    | 16   | 1  | Low-quality    | Genome-fragment | 21.27           | 0     |       |
| S8_vs_k141_181300 Full       | 2538  | No  | NA    | 0    | 0  | Not-determined | Genome-fragment | NA              | 0     |       |
| S8_vs_k141_76836 Full        | 2701  | No  | NA    | 0    | 0  | Not-determined | Genome-fragment | NA              | 0     |       |
| S8_vs_k141_7640 Full         | 2777  | No  | NA    | 0    | 2  | Not-determined | Genome-fragment | NA              | 0     |       |
| S8_vs_k141_85539 Full        | 2493  | No  | NA    | 0    | 1  | Not-determined | Genome-fragment | NA              | 0     |       |
| S8_vs_k141_13845 Full        | 1658  | No  | NA    | 0    | 0  | Not-determined | Genome-fragment | NA              | 0     |       |
| S1_vs_k141_103749 Full       | 22329 | No  | NA    | 13   | 0  | Low-quality    | Genome-fragment | 44.92           | 0     |       |
| S8_vs_k141_137504 Full       | 2480  | No  | NA    | 0    | 0  | Not-determined | Genome-fragment | NA              | 0     |       |
| S8_vs_k141_15843 Full        | 3453  | No  | NA    | 0    | 0  | Not-determined | Genome-fragment | NA              | 0     |       |
| S8_vs_k141_15847 Full        | 1567  | No  | NA    | 0    | 0  | Not-determined | Genome-fragment | NA              | 0     |       |
| S8_vs_k141_120372 Full       | 1913  | No  | NA    | 0    | 2  | Not-determined | Genome-fragment | NA              | 0     |       |
| S8_vs_k141_76852 Full        | 22932 | No  | NA    | 15   | 1  | Medium-quality | Genome-fragment | 75.16           | 0     |       |
| S8_vs_k141_33869 Full        | 3586  | No  | NA    | 0    | 3  | Not-determined | Genome-fragment | NA              | 0     |       |
| S8_vs_k141_15873 Full        | 4405  | No  | NA    | 0    | 3  | Not-determined | Genome-fragment | NA              | 0     |       |
| S8_vs_k141_50431 Full        | 26518 | No  | NA    | 12   | 0  | Medium-quality | Genome-fragment | 67.77           | 0     |       |
| S11_vs_k141_81497 Full       | 23234 | Yes | 6520  | 3    | 4  | Low-quality    | Genome-fragment | 12.52           | 70.81 |       |
| S8_vs_k141_15874 Full        | 5826  | No  | NA    | 0    | 7  | Not-determined | Genome-fragment | NA              | 0     |       |
| S8_vs_k141_50440 Full        | 1855  | No  | NA    | 0    | 0  | Not-determined | Genome-fragment | NA              | 0     |       |
| S9_extracted_k141_80079      | 23240 | No  | NA    | 8    | 0  | Low-quality    | Genome-fragment | 12.18           | 0     |       |
| S12_extracted_k141_35096     | 22381 | No  | NA    | 8    | 0  | Low-quality    | Genome-fragment | 37.93           | 0     |       |
| S3_vs_k141_15975 0_partial   | 22384 | Yes | 11513 | 3    | 9  | Low-quality    | Genome-fragment | 27.99           | 48.57 |       |
| S3_extracted_k141_2563       | 22406 | No  | NA    | 8    | 0  | Low-quality    | Genome-fragment | 38.37           | 0     |       |
| S15_extracted_17969          | 22468 | No  | NA    | 3    | 1  | Low-quality    | Genome-fragment | 27.91           | 0     |       |
| S8_vs_k141_15914 Full        | 1328  | No  | NA    | 0    | 0  | Not-determined | Genome-fragment | NA              | 0     |       |
| S8_vs_k141_50467 Full        | 2597  | No  | NA    | 0    | 3  | Not-determined | Genome-fragment | NA              | 0     |       |
| S8_vs_k141_137549 Full       | 5670  | No  | NA    | 0    | 5  | Not-determined | Genome-fragment | NA              | 0     |       |
| S16_extracted_10938          | 22473 | No  | NA    | 2    | 0  | Low-quality    | Genome-fragment | 36.56           | 0     |       |
| S8_vs_k141_33910 Full        | 2195  | No  | NA    | 0    | 2  | Not-determined | Genome-fragment | NA              | 0     |       |
| S8_vs_k141_94321 Full        | 2003  | No  | NA    | 1    | 1  | Not-determined | Genome-fragment | NA              | 0     |       |
| S8_vs_k141_188824 Full       | 10100 | No  | NA    | 0    | 8  | Not-determined | Genome-fragment | NA              | 0     |       |
| S12_vs_k141_129444 Full      | 22516 | No  | NA    | 10   | 1  | Low-quality    | Genome-fragment | 40.44           | 0     |       |
| S11_extracted_k141_14671     | 22526 | No  | NA    | 2    | 0  | Low-quality    | Genome-fragment | 12.1            | 0     |       |
| S14_vs_k141_28350 Full       | 22548 | No  | NA    | 11   | 0  | Low-quality    | Genome-fragment | 48.77           | 0     |       |
| S11_extracted_k141_104061    | 22615 | No  | NA    | 3    | 2  | Low-quality    | Genome-fragment | 28.14           | 0     |       |
| S8_vs_k141_129174 Full       | 2314  | No  | NA    | 0    | 2  | Not-determined | Genome-fragment | NA              | 0     |       |
| S8_vs_k141_188009 Full       | 3393  | No  | NA    | 0    | 2  | Not-determined | Genome-fragment | NA              | 0     |       |
| S8_vs_k141_188839 Full       | 2712  | No  | NA    | 0    | 0  | Not-determined | Genome-fragment | NA              | 0     |       |
| S10_vs_3400 Full             | 22627 | Yes | 14710 | 4    | 4  | Low-quality    | Genome-fragment | 23.86           | 34.99 |       |
| S8_vs_k141_181415 Full       | 1363  | No  | NA    | 0    | 2  | Not-determined | Genome-fragment | NA              | 0     |       |
| S17_extracted_k141_176282    | 22641 | No  | NA    | 1    | 3  | Low-quality    | Genome-fragment | 34.26           | 0     |       |
| S8_vs_k141_165854 Full       | 22682 | No  | NA    | 0    | 2  | Low-quality    | Genome-fragment | 25.74           | 0     |       |
| S8_vs_k141_198918 Full       | 3187  | No  | NA    | 0    | 2  | Not-determined | Genome-fragment | NA              | 0     |       |
| S14_extracted_k141_1716      | 22730 | No  | NA    | 5    | 0  | Low-quality    | Genome-fragment | 38.9            | 0     |       |
| S8_vs_k141_13975 Full        | 1337  | No  | NA    | 0    | 0  | Not-determined | Genome-fragment | NA              | 0     |       |
| S11_vs_k141_46044 Full       | 22769 | No  | NA    | 1    | 0  | Low-quality    | Genome-fragment | NA              | 0     |       |
| S15_vs_74861 Full            | 22784 | No  | NA    | 2    | 2  | Low-quality    | Genome-fragment | 23.58           | 0     |       |
| S8_vs_k141_102882 Full       | 7547  | No  | NA    | 0    | 3  | Not-determined | Genome-fragment | NA              | 0     |       |
| S8_vs_k141_25151 Full        | 6137  | No  | NA    | 0    | 0  | Not-determined | Genome-fragment | NA              | 0     |       |
| S6_extracted_k141_56022      | 22802 | No  | NA    | 0    | 1  | Low-quality    | Genome-fragment | 19.32           | 0     |       |
| S8_vs_k141_102898 Full       | 2089  | No  | NA    | 0    | 0  | Not-determined | Genome-fragment | NA              | 0     |       |
| S12_vs_k141_7527 Full        | 22948 | No  | NA    | 7    | 1  | Low-quality    | Genome-fragment | 41.94           | 0     |       |
| S8_vs_k141_159712 Full       | 1151  | No  | NA    | 0    | 2  | Not-determined | Genome-fragment | NA              | 0     |       |
| S8_extracted_k141_173273     | 22948 | No  | NA    | 5    | 2  | Low-quality    | Genome-fragment | 34.05           | 0     |       |
| S8_vs_k141_137667 Full       | 2751  | No  | NA    | 0    | 2  | Not-determined | Genome-fragment | NA              | 0     |       |
| S8_vs_k141_25173 Full        | 2696  | No  | NA    | 0    | 2  | Not-determined | Genome-fragment | NA              | 0     |       |
| S14_vs_k141_48104 Full       | 22989 | No  | NA    | 9    | 1  | Low-quality    | Genome-fragment | 32.48           | 0     |       |
| S11_vs_k141_43841 Full       | 23001 | Yes | 18722 | 15   | 2  | Low-quality    | Genome-fragment | 45.1            | 18.6  |       |
| S8_vs_k141_34451 Full        | 1045  | No  | NA    | 0    | 0  | Not-determined | Genome-fragment | NA              | 0     |       |
| S8_vs_k141_34042 Full        | 3853  | No  | NA    | 0    | 2  | Not-determined | Genome-fragment | NA              | 0     |       |
| S5_vs_k141_104756 Full       | 23022 | Yes | 14745 | 6    | 5  | Low-quality    | Genome-fragment | 39.71           | 35.95 |       |
| S16_vs_58184 Full            | 23040 | No  | NA    | 1    | 6  | Low-quality    | Genome-fragment | 1.85            | 0     |       |
| S8_vs_k141_17064 Full        | 1100  | No  | NA    | 0    | 0  | Not-determined | Genome-fragment | NA              | 0     |       |
| S8_vs_k141_68160 Full        | 3179  | No  | NA    | 0    | 1  | Not-determined | Genome-fragment | NA              | 0     |       |
| S8_vs_k141_137703 Full       | 2659  | No  | NA    | 0    | 2  | Not-determined | Genome-fragment | NA              | 0     |       |
| S8_vs_k141_7897 Full         | 2047  | No  | NA    | 0    | 2  | Not-determined | Genome-fragment | NA              | 0     |       |
| S8_vs_k141_198022 Full       | 2525  | No  | NA    | 0    | 0  | Not-determined | Genome-fragment | NA              | 0     |       |
| S8_extracted_k141_64910      | 23073 | No  | NA    | 6    | 2  | Low-quality    | Genome-fragment | 30.91           | 0     |       |
| S10_vs_30954 Full            | 23088 | No  | NA    | 1    | 0  | Low-quality    | Genome-fragment | 14.15           | 0     |       |
| S8_vs_k141_7871 Full         | 2404  | No  | NA    | 0    | 1  | Not-determined | Genome-fragment | NA              | 0     |       |
| S10_vs_62668 0_partial       | 23259 | No  | NA    | 2    | 10 | Low-quality    | Genome-fragment | 30.79           | 0     |       |
| S5_vs_k141_133796 0_partial  | 23273 | Yes | 12459 | 5    | 6  | Low-quality    | Genome-fragment | 16.93           | 46.47 |       |
| S16_vs_769974 Full           | 23274 | No  | NA    | 1    | 0  | Low-quality    | Genome-fragment | 36.44           | 0     |       |
| S3_extracted_k141_50486      | 23290 | No  | NA    | 2    | 0  | Low-quality    | Genome-fragment | 15.92           | 0     |       |
| S8_vs_k141_146740 Full       | 3336  | No  | NA    | 0    | 1  | Not-determined | Genome-fragment | NA              | 0     |       |
| S11_extracted_k141_13736     | 23305 | No  | NA    | 8    | 1  | Low-quality    | Genome-fragment | 40.78           | 0     |       |
| S1_vs_k141_43763 Full        | 23349 | No  | NA    | 12   | 1  | Low-quality    | Genome-fragment | 17.15           | 0     |       |
| S7_vs_101631 Full            | 23367 | Yes | 14162 | 5    | 3  | Low-quality    | Genome-fragment | 27.71           | 39.39 |       |
| S8_vs_k141_7117 Full         | 1136  | No  | NA    | 0    | 0  | Not-determined | Genome-fragment | NA              | 0     |       |
| S17_vs_k141_37726 Full       | 23387 | Yes | 7135  | 8    | 0  | Low-quality    | Genome-fragment | 11.04           | 69.49 |       |
| S8_vs_k141_146774 Full       | 4949  | No  | NA    | 0    | 1  | Not-determined | Genome-fragment | NA              | 0     |       |
| S8_vs_k141_103652 Full       | 1370  | No  | NA    | 0    | 1  | Not-determined | Genome-fragment | NA              | 0     |       |
| S16_extracted_36832          | 23417 | No  | NA    | 0    | 5  | Low-quality    | Genome-fragment | 29.67           | 0     |       |
| S8_vs_k141_146783 Full       | 1801  | No  | NA    | 0    | 1  | Not-determined | Genome-fragment | NA              | 0     |       |
| S8_vs_k141_206927 Full       | 1799  | No  | NA    | 0    | 2  | Not-determined | Genome-fragment | NA              | 0     |       |
| S8_vs_k141_7930 Full         | 2721  | No  | NA    | 0    | 3  | Not-determined | Genome-fragment | NA              | 0     |       |
| S8_vs_k141_68225 Full        | 2120  | No  | NA    | 0    | 1  | Not-determined | Genome-fragment | NA              | 0     |       |
| S8_vs_k141_206939 Full       | 1512  | No  | NA    | 0    | 1  | Not-determined | Genome-fragment | NA              | 0     |       |
| S13_vs_43054 0_partial       | 23520 | Yes | 2501  | 4    | 6  | Low-quality    | Genome-fragment | 1.97            | 89.37 |       |
| S8_vs_k141_146884 Full       | 4304  | No  | NA    | 2    | 0  | Not-determined | Genome-fragment | NA              | 0     |       |
| S12_vs_k141_147259 Full      | 23558 | No  | NA    | 6    | 0  | Low-quality    | Genome-fragment | 49.36           | 0     |       |
| S1_vs_k141_151707 Full       | 23627 | No  | NA    | 9    | 0  | Low-quality    | Genome-fragment | 40.64           | 0     |       |
| S8_vs_k141_206945 Full       | 3570  | No  | NA    | 0    | 2  | Not-determined | Genome-fragment | NA              | 0     |       |
| S3_extracted_k141_118072     | 23659 | No  | NA    | 1    | 3  | Low-quality    | Genome-fragment | 8.42            | 0     |       |
| S8_vs_k141_163595 Full       | 1994  | No  | NA    | 0    | 0  | Not-determined | Genome-fragment | NA              | 0     |       |
| S8_vs_k141_129334 Full       | 1892  | No  | NA    | 0    | 1  | Not-determined | Genome-fragment | NA              | 0     |       |
| S8_vs_k141_42472 Full        | 1393  | No  | NA    | 0    | 2  | Not-determined | Genome-fragment | NA              | 0     |       |
| S8_vs_k141_163630 Full       | 1809  | No  | NA    | 0    | 0  | Not-determined | Genome-fragment | NA              | 0     |       |
| S11_extracted_k141_22021     | 23670 | No  | NA    | 9    | 1  | Low-quality    | Genome-fragment | 45.97           | 0     |       |
| S15_extracted_57944          | 23710 | No  | NA    | 0    | 0  | Low-quality    | Genome-fragment | 25.82           | 0     |       |
| S17_vs_k141_206967 Full      | 6235  | No  | NA    | 0    | 3  | Not-determined | Genome-fragment | NA              | 0     |       |
| S17_vs_k141_90265 Full       | 23720 | No  | NA    | 1    | 18 | Low-quality    | Genome-fragment | 14.6            | 0     |       |
| S17_extracted_k141_82072     | 23748 | No  | NA    | 0    | 0  | Low-quality    | Genome-fragment | 43.6            | 0     |       |
| S8_vs_k141_103148 0_partial  | 23773 | Yes | 2583  | 3    | 9  | Low-quality    | Genome-fragment | 2.97            | 89.13 |       |
| S8_vs_k141_112189 Full       | 10630 | No  | NA    | 0    | 0  | Not-determined | Genome-fragment | NA              | 0     |       |
| S14_vs_k141_54872 Full       | 23919 | Yes | 19071 | 12   | 0  | Low-quality    | Genome-fragment | 27.54           | 20.27 |       |
| S17_extracted_k141_145006    | 23989 | No  | NA    | 9    | 1  | Low-quality    | Genome-fragment | 22.03           | 0     |       |
| S8_vs_k141_199204 Full       | 2524  | No  | NA    | 0    | 1  | Not-determined | Genome-fragment | NA              | 0     |       |
| S16_extracted_145356         | 24080 | No  | NA    | 5    | 0  | Low-quality    | Genome-fragment | NA              | 0     |       |
| S6_vs_k141_50185 1_partial   | 24099 | Yes | 21450 | 3    | 0  | Low-quality    | Genome-fragment | 27.64           | 10.99 |       |
| S8_vs_k141_25427 Full        | 1787  | No  | NA    | 0    | 1  | Not-determined | Genome-fragment | NA              | 0     |       |
| S12_vs_k141_165925 0_partial | 24115 | Yes | 14768 | 3    | 8  | Low-quality    | Genome-fragment | 20.64           | 38.76 |       |
| S8_vs_k141_68328 Full        | 1366  | No  | NA    | 0    | 0  | Not-determined | Genome-fragment | NA              | 0     |       |
| S8_vs_k141_77250 Full        | 1761  | No  | NA    | 0    | 0  | Not-determined | Genome-fragment | NA              | 0     |       |
| S11_extracted_k141_38453     | 24128 | No  | NA    | 3    | 0  | Low-quality    | Genome-fragment | 25.74           | 0     |       |
| S8_vs_k141_68321 Full        | 2700  | No  | NA    | 0    | 0  | Not-determined | Genome-fragment | NA              | 0     |       |
| S14_extracted_k141_62570     | 24206 | No  | NA    | 7    | 1  | Low-quality    | Genome-fragment | 39.5            | 0     |       |
| S8_vs_k141_181739 Full       | 1365  | No  | NA    | 0    | 1  | Not-determined | Genome-fragment | NA              | 0     |       |
| S8_vs_k141_60357 Full        | 2354  | No  | NA    | 0    | 2  | Not-determined | Genome-fragment | NA              | 0     |       |
| S17_vs_k141_134275 0_partial | 24289 | Yes | 10384 | 4    | 0  | Low-quality    | Genome-fragment | 12.59           | 57.25 |       |
| S8_vs_k141_172974 Full       | 2551  | No  | NA    | 0    | 1  | Not-determined | Genome-fragment | NA              | 0     |       |
| S12_vs_k141_26259 Full       | 24369 | No  | NA    | 7    | 1  | Low-quality    | Genome-fragment | 11.85           | 0     |       |
| S8_vs_k141_60376 Full        | 1158  | No  | NA    | 0    | 0  | Not-determined | Genome-fragment | NA              | 0     |       |
| S11_extracted_k141_89853     | 24373 | No  | NA    | 1    | 0  | Low-quality    | Genome-fragment | 27.12           | 0     |       |
| S9_vs_k141_73356 Full        | 24387 | No  | NA    | 7    | 0  | Low-quality    | Genome-fragment | 14.66           | 0     |       |
| S8_vs_k141_60397 Full        | 2702  | No  | NA    | 0    | 1  | Not-determined | Genome-fragment | NA              | 0     |       |
| S3_vs_k141_25654 Full        | 24394 | No  | NA    | 4426 | 2  | 13             | Low-quality     | Genome-fragment | 3.51  | 81.86 |
| S8_vs_k141_86033 Full        | 1372  | No  | NA    | 0    | 1  | Not-determined | Genome-fragment | NA              | 0     |       |
| S13_vs_12947 Full            | 24425 | Yes | 16092 | 3    | 3  | Low-quality    | Genome-fragment | 37.57           | 34.12 |       |
| S5_vs_k141_141116 0_partial  | 24432 | Yes | NA    | 2    | 9  | Low-quality    | Genome-fragment | 41.68           | 0     |       |
| S11_extracted_k141_9311      | 24484 | No  | NA    | 0    | 6  | Low-quality    | Genome-fragment | 30.24           | 0     |       |
| S8_vs_k141_120717 Full       | 1204  | No  | NA    | 0    | 0  | Not-determined | Genome-fragment | NA              | 0     |       |
| S13_extracted_26348          | 24540 | No  | NA    | 6    | 1  | Low-quality    | Genome-fragment | 15.43           | 0     |       |
| S9_extracted_k141_52162      | 24555 | No  | NA    | 3    | 1  | Low-quality    | Genome-fragment | 15.9            | 0     |       |
| S13_vs_114932 0_partial      | 24660 | Yes | 11027 | 3    | 5  | Low-quality    | Genome-fragment | 25.45           | 55.28 |       |
| S8_vs_k141_146981 Full       | 5477  | No  | NA    | 0    | 2  | Not-determined | Genome-fragment | NA              | 0     |       |
| S6_vs_k141_49311 Full        | 24664 | Yes | 18226 | 3    | 7  | Low-quality    | Genome-fragment | 29.59           | 26.1  |       |
| S7_vs_87587 Full             | 24718 | No  | NA    | 16   | 0  | Low-quality    | Genome-fragment | 40.98           | 0     |       |
| S8_vs_k141_60463 Full        | 2447  | No  | NA    | 0    | 1  | Not-determined | Genome-fragment | NA              | 0     |       |
| S8_vs_k141_138019 Full       | 1169  | No  | NA    | 0    | 0  | Not-determined | Genome-fragment | NA              | 0     |       |
| S8_vs_k141_189239 Full       | 1138  | No  | NA    | 0    | 1  | Not-determined | Genome-fragment | NA              | 0     |       |
| S8_vs_k141_163241 Full       |       |     |       |      |    |                |                 |                 |       |       |



|                               |       |     |       |    |    |                |                 |       |       |
|-------------------------------|-------|-----|-------|----|----|----------------|-----------------|-------|-------|
| S17_extracted_k141_110700     | 25859 | No  | NA    | 14 | 0  | Low-quality    | Genome-fragment | 43.08 | 0     |
| S8_vs_k141_02661[full]        | 1345  | No  | NA    | 1  | 1  | Not-determined | Genome-fragment | NA    | 0     |
| S13_vs_151221[full]           | 25898 | No  | NA    | 2  | 2  | Low-quality    | Genome-fragment | 23.33 | 0     |
| S8_vs_k141_1553251[full]      | 1175  | No  | NA    | 0  | 0  | Not-determined | Genome-fragment | NA    | 0     |
| S8_vs_k141_144651[full]       | 5005  | No  | NA    | 0  | 4  | Not-determined | Genome-fragment | NA    | 0     |
| S11_extracted_k141_11747      | 25932 | No  | NA    | 5  | 1  | Low-quality    | Genome-fragment | 42.38 | 0     |
| S10_extracted_11488           | 25933 | No  | NA    | 0  | 0  | Low-quality    | Genome-fragment | 15.91 | 0     |
| S10_extracted_12221           | 26038 | No  | NA    | 1  | 3  | Low-quality    | Genome-fragment | 27.16 | 0     |
| S9_vs_k141_465321[full]       | 26069 | No  | NA    | 17 | 0  | Not-determined | Genome-fragment | 43.96 | 0     |
| S8_vs_k141_1894541[full]      | 3372  | No  | NA    | 0  | 3  | Not-determined | Genome-fragment | NA    | 0     |
| S8_vs_k141_1033561[full]      | 1141  | No  | NA    | 0  | 2  | Not-determined | Genome-fragment | NA    | 0     |
| S16_vs_15446511[full]         | 26091 | No  | NA    | 8  | 0  | Low-quality    | Genome-fragment | 41.25 | 0     |
| S5_vs_k141_323701[full]       | 26101 | Yes | 18181 | 14 | 4  | Low-quality    | Genome-fragment | 47.44 | 30.34 |
| S11_extracted_k141_91744      | 26102 | No  | NA    | 0  | 0  | Low-quality    | Genome-fragment | 28.67 | 0     |
| S8_vs_k141_1553571[full]      | 5420  | No  | NA    | 0  | 1  | Not-determined | Genome-fragment | NA    | 0     |
| S8_vs_k141_47891[full]        | 6349  | No  | NA    | 15 | 0  | Not-determined | Genome-fragment | NA    | 0     |
| S8_vs_k141_1033811[full]      | 2283  | No  | NA    | 0  | 1  | Not-determined | Genome-fragment | NA    | 0     |
| S8_vs_k141_507311[full]       | 6279  | No  | NA    | 0  | 1  | Not-determined | Genome-fragment | NA    | 0     |
| S8_vs_k141_1820421[full]      | 2159  | No  | NA    | 0  | 1  | Not-determined | Genome-fragment | NA    | 0     |
| S8_vs_k141_165521[full]       | 3822  | No  | NA    | 0  | 3  | Not-determined | Genome-fragment | NA    | 0     |
| S1_vs_k141_386221[full]       | 26129 | No  | NA    | 5  | 1  | Low-quality    | Genome-fragment | 19.41 | 0     |
| S16_extracted_5250            | 26283 | No  | NA    | 5  | 0  | Low-quality    | Genome-fragment | 17.62 | 0     |
| S8_vs_k141_1639621[full]      | 1690  | No  | NA    | 0  | 0  | Not-determined | Genome-fragment | NA    | 0     |
| S9_vs_k141_606491[full]       | 26335 | No  | NA    | 5  | 1  | Low-quality    | Genome-fragment | 48.35 | 0     |
| S8_vs_k141_1820931[full]      | 1155  | No  | NA    | 0  | 1  | Not-determined | Genome-fragment | NA    | 0     |
| S8_vs_k141_2072341[full]      | 1541  | No  | NA    | 0  | 1  | Not-determined | Genome-fragment | NA    | 0     |
| S16_extracted_32772           | 26515 | No  | NA    | 8  | 2  | Low-quality    | Genome-fragment | 32.88 | 0     |
| S13_vs_1486401[0_partial]     | 26597 | No  | NA    | 1  | 12 | Low-quality    | Genome-fragment | 39.79 | 0     |
| S17_extracted_k141_127748     | 26613 | No  | NA    | 15 | 0  | Low-quality    | Genome-fragment | 40.14 | 0     |
| S8_vs_k141_686871[full]       | 6965  | No  | NA    | 0  | 2  | Not-determined | Genome-fragment | NA    | 0     |
| S16_vs_1199921[full]          | 26634 | No  | NA    | 3  | 1  | Low-quality    | Genome-fragment | 44.5  | 0     |
| S15_vs_402911[full]           | 26661 | Yes | 13768 | 7  | 7  | Low-quality    | Genome-fragment | 25.77 | 48.36 |
| S3_vs_k141_853801[full]       | 26747 | No  | NA    | 8  | 0  | Low-quality    | Genome-fragment | 20.01 | 0     |
| S10_vs_138071[full]           | 26891 | No  | NA    | 1  | 12 | Low-quality    | Genome-fragment | 15.9  | 0     |
| S6_vs_k141_300251[full]       | 26900 | Yes | 8809  | 3  | 15 | Low-quality    | Genome-fragment | 16.76 | 67.25 |
| S8_vs_k141_1453391[full]      | 2393  | No  | NA    | 0  | 2  | Not-determined | Genome-fragment | NA    | 0     |
| S16_vs_853161[full]           | 26931 | No  | NA    | 13 | 0  | Low-quality    | Genome-fragment | 46.12 | 0     |
| S8_vs_k141_862921[full]       | 2304  | No  | NA    | 0  | 0  | Not-determined | Genome-fragment | NA    | 0     |
| S8_vs_k141_15540071[full]     | 1507  | No  | NA    | 0  | 2  | Not-determined | Genome-fragment | NA    | 0     |
| S7_extracted_94949            | 26939 | No  | NA    | 2  | 0  | Low-quality    | Genome-fragment | 16.29 | 0     |
| S16_vs_1026331[0_partial]     | 26952 | Yes | 13776 | 2  | 2  | Low-quality    | Genome-fragment | 18.24 | 48.89 |
| S8_vs_k141_177211[full]       | 1311  | No  | NA    | 0  | 0  | Not-determined | Genome-fragment | NA    | 0     |
| S8_vs_k141_687101[full]       | 3480  | No  | NA    | 0  | 1  | Not-determined | Genome-fragment | NA    | 0     |
| S13_extracted_105454          | 26996 | Yes | 24404 | 6  | 3  | Low-quality    | Genome-fragment | 18.18 | 9.6   |
| S8_vs_k141_1821221[full]      | 1313  | No  | NA    | 0  | 0  | Not-determined | Genome-fragment | NA    | 0     |
| S8_vs_k141_1554181[full]      | 2331  | No  | NA    | 0  | 1  | Not-determined | Genome-fragment | NA    | 0     |
| S8_vs_k141_1471781[full]      | 2961  | No  | NA    | 0  | 1  | Not-determined | Genome-fragment | NA    | 0     |
| S8_vs_k141_428661[full]       | 1370  | No  | NA    | 0  | 1  | Not-determined | Genome-fragment | NA    | 0     |
| S5_vs_k141_1358441[full]      | 27012 | No  | NA    | 0  | 12 | Low-quality    | Genome-fragment | NA    | 9.43  |
| S8_vs_k141_1895781[full]      | 1219  | No  | NA    | 0  | 1  | Not-determined | Genome-fragment | NA    | 0     |
| S8_vs_k141_1821361[full]      | 1655  | No  | NA    | 0  | 0  | Not-determined | Genome-fragment | NA    | 0     |
| S2_vs_k141_591421[full]       | 27046 | No  | NA    | 12 | 0  | Low-quality    | Genome-fragment | 47.87 | 0     |
| S10_extracted_58078           | 27111 | No  | NA    | 20 | 0  | Low-quality    | Genome-fragment | 44.49 | 0     |
| S16_extracted_31401           | 27215 | No  | NA    | 1  | 12 | Low-quality    | Genome-fragment | 2.19  | 0     |
| S8_extracted_k141_58241       | 27297 | No  | NA    | 12 | 1  | Low-quality    | Genome-fragment | 48.89 | 0     |
| S8_vs_k141_687161[full]       | 1819  | No  | NA    | 0  | 2  | Not-determined | Genome-fragment | NA    | 0     |
| S8_vs_k141_1995761[full]      | 1444  | No  | NA    | 0  | 1  | Not-determined | Genome-fragment | NA    | 0     |
| S8_vs_k141_1297591[full]      | 1057  | No  | NA    | 0  | 1  | Not-determined | Genome-fragment | NA    | 0     |
| S8_vs_k141_166431[full]       | 1170  | No  | NA    | 0  | 1  | Not-determined | Genome-fragment | NA    | 0     |
| S8_vs_k141_606711[full]       | 1401  | No  | NA    | 0  | 0  | Not-determined | Genome-fragment | NA    | 0     |
| S16_vs_28641[full]            | 27398 | Yes | 9964  | 4  | 12 | Low-quality    | Genome-fragment | 23.96 | 63.63 |
| S10_vs_123411[full]           | 27472 | No  | NA    | 1  | 1  | Low-quality    | Genome-fragment | 39.68 | 0     |
| S8_vs_k141_949161[full]       | 3625  | No  | NA    | 0  | 3  | Not-determined | Genome-fragment | NA    | 0     |
| S8_vs_k141_84071[full]        | 2176  | No  | NA    | 0  | 2  | Not-determined | Genome-fragment | NA    | 0     |
| S8_vs_k141_145801[full]       | 6759  | No  | NA    | 4  | 1  | Not-determined | Genome-fragment | NA    | 0     |
| S8_vs_k141_166671[full]       | 3144  | No  | NA    | 0  | 3  | Not-determined | Genome-fragment | NA    | 0     |
| S14_vs_k141_722621[0_partial] | 27532 | No  | NA    | 1  | 6  | Low-quality    | Genome-fragment | 21.1  | 0     |
| S8_vs_k141_1640351[full]      | 4625  | No  | NA    | 0  | 1  | Not-determined | Genome-fragment | NA    | 0     |
| S16_vs_1128951[full]          | 27645 | No  | NA    | 24 | 0  | Low-quality    | Genome-fragment | 48.8  | 0     |
| S8_vs_k141_2074281[full]      | 3340  | No  | NA    | 0  | 2  | Not-determined | Genome-fragment | NA    | 0     |
| S6_vs_k141_158401[full]       | 27658 | Yes | 14251 | 5  | 5  | Low-quality    | Genome-fragment | 5.2   | 48.47 |
| S8_vs_k141_166901[full]       | 2755  | No  | NA    | 1  | 1  | Not-determined | Genome-fragment | NA    | 0     |
| S7_vs_522641[full]            | 27693 | No  | NA    | 2  | 6  | Low-quality    | Genome-fragment | 20.33 | 0     |
| S8_vs_k141_178271[full]       | 2491  | No  | NA    | 0  | 1  | Not-determined | Genome-fragment | NA    | 0     |
| S8_vs_k141_1555071[full]      | 4634  | No  | NA    | 0  | 1  | Not-determined | Genome-fragment | NA    | 0     |
| S17_vs_k141_1455571[full]     | 27694 | No  | NA    | 9  | 1  | Low-quality    | Genome-fragment | 42.85 | 0     |
| S10_vs_11263311[full]         | 27746 | No  | NA    | 0  | 15 | Low-quality    | Genome-fragment | 14.93 | 0     |
| S8_vs_k141_2074411[full]      | 18913 | No  | NA    | 0  | 12 | Not-determined | Genome-fragment | NA    | 0     |
| S8_extracted_k141_460         | 28054 | No  | NA    | 0  | 0  | Low-quality    | Genome-fragment | 22.41 | 0     |
| S11_vs_k141_473161[full]      | 28074 | No  | NA    | 4  | 0  | Low-quality    | Genome-fragment | 40.6  | 0     |
| S16_extracted_97619           | 28246 | No  | NA    | 4  | 0  | Low-quality    | Genome-fragment | 23.93 | 0     |
| S8_vs_k141_1822221[full]      | 5031  | No  | NA    | 0  | 5  | Not-determined | Genome-fragment | NA    | 0     |
| S7_vs_807491[full]            | 28481 | No  | NA    | 1  | 10 | Low-quality    | Genome-fragment | 42.23 | 0     |
| S7_vs_514161[full]            | 28533 | No  | NA    | 2  | 3  | Low-quality    | Genome-fragment | 19.12 | 0     |
| S8_vs_k141_14771[full]        | 2039  | No  | NA    | 0  | 0  | Not-determined | Genome-fragment | NA    | 0     |
| S8_vs_k141_607361[full]       | 5296  | No  | NA    | 0  | 1  | Not-determined | Genome-fragment | NA    | 0     |
| S8_vs_k141_864251[full]       | 9205  | No  | NA    | 0  | 6  | Not-determined | Genome-fragment | NA    | 0     |
| S9_extracted_k141_39660       | 28589 | No  | NA    | 5  | 1  | Low-quality    | Genome-fragment | 29.75 | 0     |
| S8_vs_k141_2074571[full]      | 1596  | No  | NA    | 0  | 0  | Not-determined | Genome-fragment | NA    | 0     |
| S5_vs_k141_460471[0_partial]  | 28613 | Yes | 15186 | 4  | 6  | Low-quality    | Genome-fragment | 36.5  | 46.96 |
| S16_extracted_165719          | 28704 | Yes | 23461 | 14 | 3  | Low-quality    | Genome-fragment | 48.28 | 18.27 |
| S6_vs_k141_950181[full]       | 2894  | No  | NA    | 0  | 0  | Not-determined | Genome-fragment | NA    | 0     |
| S6_vs_k141_62711[full]        | 28736 | Yes | 3986  | 2  | 8  | Low-quality    | Genome-fragment | 86.13 | 0     |
| S11_vs_k141_16921[full]       | 28752 | No  | NA    | 9  | 0  | Low-quality    | Genome-fragment | 48.87 | 0     |
| S5_extracted_k141_128217      | 28783 | No  | NA    | 6  | 6  | Low-quality    | Genome-fragment | 15.61 | 0     |
| S16_vs_566851[full]           | 28882 | Yes | 14158 | 6  | 13 | Low-quality    | Genome-fragment | 29.77 | 50.98 |
| S15_vs_323521[full]           | 28927 | Yes | 18379 | 6  | 4  | Low-quality    | Genome-fragment | 38.99 | 36.46 |
| S12_vs_k141_1294901[full]     | 29011 | Yes | 8609  | 5  | 10 | Low-quality    | Genome-fragment | 16.94 | 70.33 |
| S16_vs_540711[full]           | 29049 | No  | NA    | 0  | 0  | Low-quality    | Genome-fragment | NA    | 0     |
| S8_vs_k141_689161[full]       | 3249  | No  | NA    | 0  | 2  | Not-determined | Genome-fragment | NA    | 0     |
| S8_vs_k141_508571[full]       | 1274  | No  | NA    | 0  | 0  | Not-determined | Genome-fragment | NA    | 0     |
| S8_vs_k141_1211491[full]      | 1770  | No  | NA    | 0  | 0  | Not-determined | Genome-fragment | NA    | 0     |
| S3_extracted_k141_44954       | 29143 | No  | NA    | 5  | 0  | Low-quality    | Genome-fragment | 17.21 | 0     |
| S16_vs_1432981[0_partial]     | 29157 | No  | NA    | 1  | 5  | Low-quality    | Genome-fragment | 26.19 | 0     |
| S7_extracted_3110             | 29179 | No  | NA    | 1  | 2  | Low-quality    | Genome-fragment | 19.8  | 0     |
| S8_vs_k141_1385231[full]      | 2202  | No  | NA    | 0  | 2  | Not-determined | Genome-fragment | NA    | 0     |
| S8_vs_k141_86071[full]        | 2952  | No  | NA    | 0  | 3  | Not-determined | Genome-fragment | NA    | 0     |
| S16_vs_1627671[full]          | 29269 | No  | NA    | 1  | 2  | Low-quality    | Genome-fragment | 26.41 | 0     |
| S8_vs_k141_689531[full]       | 2516  | No  | NA    | 3  | 0  | Not-determined | Genome-fragment | NA    | 0     |
| S11_extracted_k141_46426      | 19385 | No  | NA    | 3  | 1  | Low-quality    | Genome-fragment | 37.41 | 0     |
| S8_vs_k141_1642181[full]      | 1577  | No  | NA    | 0  | 0  | Not-determined | Genome-fragment | NA    | 0     |
| S5_vs_k141_1447481[full]      | 29463 | No  | NA    | 0  | 1  | Low-quality    | Genome-fragment | 23.58 | 0     |
| S8_vs_k141_1037481[full]      | 1627  | No  | NA    | 0  | 1  | Not-determined | Genome-fragment | NA    | 0     |
| S5_vs_k141_153201[full]       | 29713 | Yes | 11412 | 6  | 15 | Low-quality    | Genome-fragment | 21.36 | 61.59 |
| S16_vs_1104001[full]          | 29779 | Yes | 2062  | 3  | 1  | Low-quality    | Genome-fragment | 27.58 | 21.56 |
| S14_vs_k141_483511[full]      | 29857 | Yes | 18264 | 2  | 6  | Low-quality    | Genome-fragment | 23.44 | 38.83 |
| S8_vs_k141_1212501[full]      | 1068  | No  | NA    | 0  | 0  | Not-determined | Genome-fragment | NA    | 0     |
| S8_vs_k141_189811[full]       | 1646  | No  | NA    | 0  | 0  | Not-determined | Genome-fragment | NA    | 0     |
| S8_vs_k141_1474401[full]      | 1487  | No  | NA    | 0  | 0  | Not-determined | Genome-fragment | NA    | 0     |
| S8_vs_k141_952431[full]       | 2194  | No  | NA    | 0  | 1  | Not-determined | Genome-fragment | NA    | 0     |
| S8_vs_k141_1734301[full]      | 2140  | No  | NA    | 0  | 4  | Not-determined | Genome-fragment | NA    | 0     |
| S16_vs_1180591[full]          | 2888  | Yes | 19121 | 6  | 5  | Low-quality    | Genome-fragment | 42.88 | 36.02 |
| S8_vs_k141_1898451[full]      | 1015  | No  | NA    | 0  | 1  | Not-determined | Genome-fragment | NA    | 0     |
| S16_vs_15573271[full]         | 10896 | No  | NA    | 0  | 5  | Not-determined | Genome-fragment | NA    | 0     |
| S16_vs_1121001[full]          | 30080 | No  | NA    | 1  | 0  | Low-quality    | Genome-fragment | 49.52 | 0     |
| S8_vs_k141_1301131[full]      | 1507  | No  | NA    | 0  | 1  | Not-determined | Genome-fragment | NA    | 0     |
| S8_extracted_k141_192408      | 30246 | No  | NA    | 1  | 0  | Low-quality    | Genome-fragment | 14.62 | 0     |
| S8_vs_k141_169891[full]       | 1004  | No  | NA    | 0  | 1  | Not-determined | Genome-fragment | NA    | 0     |
| S10_extracted_101000          | 30643 | No  | NA    | 11 | 0  | Low-quality    | Genome-fragment | 20.19 | 0     |
| S8_vs_k141_866991[full]       | 6322  | No  | NA    | 0  | 2  | Not-determined | Genome-fragment | NA    | 0     |
| S8_vs_k141_1213511[full]      | 1042  | No  | NA    | 0  | 0  | Not-determined | Genome-fragment | NA    | 0     |
| S8_vs_k141_1558051[full]      | 3344  | No  | NA    | 0  | 2  | Not-determined | Genome-fragment | NA    | 0     |
| S15_vs_531501[full]           | 30906 | Yes | 20552 | 10 | 7  | Low-quality    | Genome-fragment | 31.87 | 33.5  |
| S8_vs_k141_691461[full]       | 2443  | No  | NA    | 0  | 2  | Not-determined | Genome-fragment | NA    | 0     |
| S8_vs_k141_511291[full]       | 1538  | No  | NA    | 0  | 0  | Not-determined | Genome-fragment | NA    | 0     |
| S8_vs_k141_170071[full]       | 6423  | No  | NA    | 0  | 4  | Not-determined | Genome-fragment | NA    | 0     |
| S10_extracted_73144           | 30971 | No  | NA    | 10 | 0  | Low-quality    | Genome-fragment | 20.13 | 0     |
| S3_vs_k141_118671[full]       | 10109 | Yes | 9475  | 5  | 13 | Low-quality    | Genome-fragment | 17.58 | 69.46 |
| S7_extracted_89258            | 13464 | No  | NA    | 10 | 1  | Low-quality    | Genome-fragment | 19.54 | 0     |
| S17_vs_k141_897921[full]      | 31489 | No  | NA    | 6  | 3  | Low            |                 |       |       |



|                             |             |       |     |       |       |    |                |                 |                 |       |       |       |
|-----------------------------|-------------|-------|-----|-------|-------|----|----------------|-----------------|-----------------|-------|-------|-------|
| 58_vs_k141_156087           | [full]      | 1247  | No  | NA    | 0     | 1  | Not-determined | Genome-fragment | NA              | 0     | 0     |       |
| 513_extracted_94148         |             | 35514 | No  | NA    | 7     | 2  | Low-quality    | Genome-fragment | NA              | 26.47 | 0     |       |
| 58_vs_k141_190331           | [full]      | 1924  | No  | NA    | 0     | 2  | Not-determined | Genome-fragment | NA              | 0     | 0     |       |
| 517_vs_k141_57702           | [full]      | 35897 | Yes | 12631 | 5     | 18 | Low-quality    | Genome-fragment | NA              | 33.87 | 64.81 |       |
| 515_extracted_8485          |             | 35950 | No  | NA    | 6     | 1  | Low-quality    | Genome-fragment | NA              | 37.92 | 0     |       |
| 515_extracted_7130          |             | 36448 | No  | NA    | 5     | 1  | Low-quality    | Genome-fragment | NA              | 38.46 | 0     |       |
| 58_vs_k141_156141           | [full]      | 1109  | No  | NA    | 0     | 0  | Not-determined | Genome-fragment | NA              | 0     | 0     |       |
| 58_vs_k141_164754           | [full]      | 1175  | No  | NA    | 0     | 0  | Not-determined | Genome-fragment | NA              | 0     | 0     |       |
| 58_vs_k141_172311           | [full]      | 2822  | No  | NA    | 0     | 4  | Not-determined | Genome-fragment | NA              | 0     | 0     |       |
| 516_vs_53197                | [full]      | 36661 | No  | NA    | 15    | 1  | Low-quality    | Genome-fragment | NA              | 22.98 | 0     |       |
| 54_vs_VirSorter_23724-cat_2 |             | 37015 | No  | NA    | 7     | 1  | Low-quality    | Genome-fragment | NA              | 39.37 | 0     |       |
| 58_vs_k141_190519           | [full]      | 3071  | No  | NA    | 0     | 3  | Not-determined | Genome-fragment | NA              | 0     | 0     |       |
| 57_vs_8597                  | [full]      | 37161 | Yes | 16057 | 5     | 7  | Low-quality    | Genome-fragment | NA              | 42.83 | 56.79 |       |
| 512_vs_k141_167336          | [full]      | 37181 | No  | NA    | 0     | 5  | Low-quality    | Genome-fragment | NA              | 27.53 | 0     |       |
| 58_vs_k141_15166            | [full]      | 1542  | No  | NA    | 0     | 1  | Not-determined | Genome-fragment | NA              | 27.53 | 0     |       |
| 55_extracted_k141_140500    |             | 37214 | No  | NA    | 1     | 12 | Low-quality    | Genome-fragment | NA              | 18.25 | 0     |       |
| 512_vs_k141_62940           | [full]      | 37268 | Yes | 33748 | 8     | 2  | Low-quality    | Genome-fragment | NA              | 46.18 | 9.45  |       |
| 58_vs_k141_190619           | [full]      | 1763  | No  | NA    | 0     | 1  | Not-determined | Genome-fragment | NA              | 0     | 0     |       |
| 58_vs_k141_151819           | [full]      | 1100  | No  | NA    | 0     | 1  | Not-determined | Genome-fragment | NA              | 0     | 0     |       |
| 511_vs_k141_37914           | [full]      | 37606 | Yes | 10744 | 5     | 19 | Low-quality    | Genome-fragment | NA              | 30.91 | 71.43 |       |
| 53_vs_k141_126959           | [full]      | 37730 | Yes | 23235 | 10    | 11 | Low-quality    | Genome-fragment | NA              | 45.46 | 38.42 |       |
| 57_vs_19422                 | [full]      | 37966 | Yes | 30182 | 3     | 9  | Low-quality    | Genome-fragment | NA              | 42.92 | 20.5  |       |
| 58_vs_k141_52054            | [full]      | 11547 | No  | NA    | 0     | 13 | Not-determined | Genome-fragment | NA              | 0     | 0     |       |
| 57_extracted_61175          |             | 38005 | No  | NA    | 5     | 4  | Low-quality    | Genome-fragment | NA              | 22.26 | 0     |       |
| 58_vs_k141_35390            | [0_partial] | 36037 | No  | NA    | 0     | 18 | Not-determined | Genome-fragment | NA              | 45.56 | 0     |       |
| 513_vs_12830                | [full]      | 38028 | No  | NA    | 19    | 1  | Low-quality    | Genome-fragment | NA              | 21.95 | 0     |       |
| 513_extracted_12330         |             | 38274 | No  | NA    | 1     | 7  | Low-quality    | Genome-fragment | NA              | 0     | 0     |       |
| 58_vs_k141_62364            | [0_partial] | 13084 | No  | NA    | 0     | 4  | Not-determined | Genome-fragment | NA              | 0     | 0     |       |
| 52_vs_k141_3914             | [full]      | 38307 | Yes | 27363 | 12    | 0  | Low-quality    | Genome-fragment | NA              | 38.84 | 28.57 |       |
| 56_vs_k141_34279            | [full]      | 38335 | Yes | 30591 | 13    | 8  | Low-quality    | Genome-fragment | NA              | 46.56 | 20.2  |       |
| 59_extracted_k141_12293     |             | 38474 | No  | NA    | 0     | 28 | Low-quality    | Genome-fragment | NA              | 13.55 | 0     |       |
| 58_vs_k141_2668             | [0_partial] | 11651 | No  | NA    | 0     | 9  | Not-determined | Genome-fragment | NA              | 0     | 0     |       |
| 58_vs_k141_11189            | [full]      | 38851 | Yes | 26180 | 6     | 9  | Low-quality    | Genome-fragment | NA              | 49.01 | 32.61 |       |
| 58_vs_k141_120627           | [full]      | 39189 | No  | NA    | 9     | 0  | Low-quality    | Genome-fragment | NA              | 35.3  | 0     |       |
| 58_vs_k141_28825            | [0_partial] | 10990 | No  | NA    | 0     | 9  | Not-determined | Genome-fragment | NA              | 28.98 | 0     |       |
| 58_extracted_k141_64313     |             | 39863 | No  | NA    | 11    | 1  | Low-quality    | Genome-fragment | NA              | 24.93 | 65.94 |       |
| 512_vs_k141_124042          | [full]      | 39972 | Yes | 13614 | 4     | 12 | Low-quality    | Genome-fragment | NA              | 0     | 0     |       |
| 58_vs_k141_185981           | [0_partial] | 13735 | No  | NA    | 0     | 10 | Not-determined | Genome-fragment | NA              | 33.97 | 0     |       |
| 55_extracted_k141_137355    |             | 40094 | No  | NA    | 12    | 0  | Low-quality    | Genome-fragment | NA              | 27.45 | 0     |       |
| 54_extracted_20987          |             | 40120 | No  | NA    | 12    | 0  | Low-quality    | Genome-fragment | NA              | 25.17 | 0     |       |
| 58_extracted_k141_122972    |             | 40510 | No  | NA    | 8     | 0  | Low-quality    | Genome-fragment | NA              | 25.26 | 0     |       |
| 511_vs_k141_50428           | [full]      | 40617 | No  | NA    | 12    | 2  | Low-quality    | Genome-fragment | NA              | 25.49 | 0     |       |
| 512_extracted_k141_28003    |             | 41890 | No  | NA    | 12    | 0  | Low-quality    | Genome-fragment | NA              | 35.57 | 0     |       |
| 516_extracted_41661         |             | 42002 | No  | NA    | 18    | 0  | Low-quality    | Genome-fragment | NA              | 5.11  | 91.44 |       |
| 512_vs_k141_47540           | [full]      | 42209 | Yes | 3614  | 3     | 20 | Low-quality    | Genome-fragment | NA              | 7.25  | 0     |       |
| 514_vs_k141_52108           | [full]      | 42511 | Yes | 39448 | 5     | 4  | Low-quality    | Genome-fragment | NA              | 45.47 | 0     |       |
| 58_vs_k141_95659            | [H2gene]    | 1493  | No  | NA    | 0     | 0  | Not-determined | Genome-fragment | NA              | 0     | 0     |       |
| 58_extracted_k141_357       |             | 43276 | No  | NA    | 3     | 0  | Low-quality    | Genome-fragment | NA              | 34.69 | 0     |       |
| 58_extracted_k141_47914     |             | 43557 | No  | NA    | 12    | 0  | Low-quality    | Genome-fragment | NA              | 36.57 | 0     |       |
| 512_extracted_k141_148065   |             | 43513 | No  | NA    | 19    | 0  | Low-quality    | Genome-fragment | NA              | 39.43 | 0     |       |
| 516_vs_67322                | [full]      | 43778 | No  | NA    | 6     | 1  | Low-quality    | Genome-fragment | NA              | 11.58 | 0     |       |
| 512_vs_104879               | [full]      | 44008 | No  | NA    | 1     | 15 | Low-quality    | Genome-fragment | NA              | 14.67 | 75.16 |       |
| 514_vs_k141_17251           | [full]      | 44871 | Yes | 11148 | 6     | 0  | Low-quality    | Genome-fragment | NA              | 27.93 | 0     |       |
| 53_extracted_k141_97741     |             | 44923 | No  | NA    | 9     | 0  | Low-quality    | Genome-fragment | NA              | 45.2  | 0     |       |
| 58_vs_k141_17234            | [H2gene]    | 1012  | No  | NA    | 0     | 1  | Not-determined | Genome-fragment | NA              | 28.26 | 0     |       |
| 58_extracted_k141_98388     |             | 45147 | No  | NA    | 10    | 1  | Low-quality    | Genome-fragment | NA              | 27.31 | 0     |       |
| 510_vs_16005                | [full]      | 45426 | No  | NA    | 13    | 3  | Low-quality    | Genome-fragment | NA              | 46.73 | 0     |       |
| 58_vs_k141_44578            | [H2gene]    | 2678  | No  | NA    | 0     | 1  | Not-determined | Genome-fragment | NA              | 18.82 | 0     |       |
| 57_extracted_k1458          |             | 45921 | No  | NA    | 12    | 1  | Low-quality    | Genome-fragment | NA              | 43.2  | 0     |       |
| 58_extracted_k141_131551    |             | 46265 | No  | NA    | 12    | 0  | Low-quality    | Genome-fragment | NA              | 23.99 | 0     |       |
| 55_vs_k141_19188            | [full]      | 46306 | No  | NA    | 1     | 8  | Low-quality    | Genome-fragment | NA              | 30.22 | 0     |       |
| 513_extracted_150247        |             | 47158 | No  | NA    | 18    | 0  | Low-quality    | Genome-fragment | NA              | 0     | 0     |       |
| 517_extracted_k141_8382     |             | 47192 | No  | NA    | 0     | 48 | Low-quality    | Genome-fragment | NA              | 0     | 0     |       |
| 58_vs_k141_14341            | [H2gene]    | 1385  | No  | NA    | 0     | 0  | Not-determined | Genome-fragment | NA              | 0     | 0     |       |
| 54_extracted_9769           |             | 47540 | No  | NA    | 14    | 1  | Low-quality    | Genome-fragment | NA              | 0     | 0     |       |
| 58_vs_k141_80357            | [H2gene]    | 2046  | No  | NA    | 0     | 0  | Not-determined | Genome-fragment | NA              | 0     | 0     |       |
| 58_vs_k141_175750           | [H2gene]    | 1738  | No  | NA    | 0     | 0  | Not-determined | Genome-fragment | NA              | 0     | 0     |       |
| 58_vs_k141_122991           | [H2gene]    | 2112  | No  | NA    | 0     | 0  | Not-determined | Genome-fragment | NA              | 0     | 0     |       |
| 58_vs_k141_1340             | [H2gene]    | 1052  | No  | NA    | 0     | 0  | Not-determined | Genome-fragment | NA              | 0     | 0     |       |
| 514_extracted_k141_37090    |             | 48080 | No  | NA    | 2     | 17 | Low-quality    | Genome-fragment | NA              | 32.83 | 0     |       |
| 514_vs_k141_38235           | [full]      | 48094 | No  | NA    | 17    | 2  | Low-quality    | Genome-fragment | NA              | 36.47 | 0     |       |
| 58_vs_k141_17844            | [H2gene]    | 2584  | No  | NA    | 0     | 0  | Not-determined | Genome-fragment | NA              | 0     | 0     |       |
| 517_vs_k141_176606          | [full]      | 48195 | Yes | 17313 | 7     | 10 | Low-quality    | Genome-fragment | NA              | 48.37 | 64.08 |       |
| 517_vs_k141_63384           | [full]      | 48935 | No  | NA    | 1     | 18 | Low-quality    | Genome-fragment | NA              | 33.82 | 0     |       |
| 58_extracted_k141_197122    |             | 49397 | No  | NA    | 5     | 0  | Low-quality    | Genome-fragment | NA              | 49.77 | 0     |       |
| 516_vs_118433               | [full]      | 49513 | Yes | 39194 | 10    | 4  | Low-quality    | Genome-fragment | NA              | 25.23 | 20.84 |       |
| 58_vs_k141_3037             | [H2gene]    | 1332  | No  | NA    | 0     | 0  | Not-determined | Genome-fragment | NA              | 0     | 0     |       |
| 516_vs_24040                | [full]      | 49569 | No  | NA    | 27    | 0  | Low-quality    | Genome-fragment | NA              | 43.53 | 0     |       |
| 516_extracted_3735          |             | 49711 | No  | NA    | 8     | 0  | Low-quality    | Genome-fragment | NA              | 30.02 | 0     |       |
| 59_vs_k141_60854            | [full]      | 49942 | No  | NA    | 7     | 3  | Low-quality    | Genome-fragment | NA              | 18.62 | 85.54 |       |
| 58_vs_k141_118648           | [full]      | 50053 | Yes | 7238  | 2     | 26 | Low-quality    | Genome-fragment | NA              | 38.82 | 67.91 |       |
| 58_vs_k141_16635            | [full]      | 50122 | Yes | 16375 | 8     | 9  | Low-quality    | Genome-fragment | NA              | 24.71 | 74.23 |       |
| 516_vs_25976                | [full]      | 51282 | Yes | 13215 | 8     | 19 | Low-quality    | Genome-fragment | NA              | 32.36 | 0     |       |
| 514_vs_k141_48012           | [full]      | 51580 | No  | NA    | 1     | 27 | Low-quality    | Genome-fragment | NA              | 30.3  | 0     |       |
| 58_vs_k141_133455           | [H2gene]    | 4421  | No  | NA    | 0     | 1  | Not-determined | Genome-fragment | NA              | 0     | 0     |       |
| 517_extracted_k141_145540   |             | 52253 | No  | NA    | 12    | 1  | Low-quality    | Genome-fragment | NA              | 25.27 | 62.2  |       |
| 58_vs_k141_168250           | [H2gene]    | 1031  | No  | NA    | 0     | 0  | Not-determined | Genome-fragment | NA              | 0     | 0     |       |
| 52_vs_k141_1357             | [full]      | 53897 | Yes | 20573 | 6     | 13 | Low-quality    | Genome-fragment | NA              | 20.29 | 82.32 |       |
| 58_vs_k141_150726           | [H2gene]    | 1263  | No  | NA    | 0     | 0  | Not-determined | Genome-fragment | NA              | 0     | 0     |       |
| 58_vs_k141_21251            | [H2gene]    | 1022  | No  | NA    | 0     | 0  | Not-determined | Genome-fragment | NA              | 0     | 0     |       |
| 58_vs_k141_17608            | [full]      | 54751 | Yes | 9678  | 5     | 25 | Low-quality    | Genome-fragment | NA              | 38.27 | 0     |       |
| 514_extracted_k141_45680    |             | 55332 | No  | NA    | 1     | 13 | Low-quality    | Genome-fragment | NA              | 31.68 | 76.15 |       |
| 53_extracted_k141_1184      |             | 55979 | No  | NA    | 13    | 0  | Low-quality    | Genome-fragment | NA              | 35.78 | 0     |       |
| 58_vs_k141_15240            | [full]      | 56536 | Yes | 13482 | 12    | 19 | Low-quality    | Genome-fragment | NA              | 44.41 | 58.63 |       |
| 510_vs_13943                | [full]      | 58316 | No  | NA    | 6     | 0  | Low-quality    | Genome-fragment | NA              | 25.82 | 45.09 |       |
| 517_vs_k141_2294            | [full]      | 58804 | Yes | 16182 | 14    | 24 | Low-quality    | Genome-fragment | NA              | 47.18 | 46.53 |       |
| 56_vs_k141_1156             | [full]      | 59458 | Yes | 24598 | 6     | 25 | Low-quality    | Genome-fragment | NA              | 46.46 | 0     |       |
| 58_vs_k141_98638            | [full]      | 60212 | Yes | 30604 | 2     | 17 | Low-quality    | Genome-fragment | NA              | 36.17 | 80.58 |       |
| 56_vs_k141_12125            | [full]      | 61741 | No  | NA    | 5     | 27 | Low-quality    | Genome-fragment | NA              | 48.74 | 0     |       |
| 56_vs_k141_13728            | [full]      | 62293 | No  | NA    | 3     | 15 | Low-quality    | Genome-fragment | NA              | 14.24 | 82.7  |       |
| 511_vs_k141_67166           | [full]      | 63238 | Yes | 10781 | 4     | 38 | Low-quality    | Genome-fragment | NA              | 30.13 | 76.75 |       |
| 517_vs_k141_39852           | [full]      | 65549 | Yes | 15218 | 10    | 1  | Low-quality    | Genome-fragment | NA              | 37.6  | 0     |       |
| 58_vs_k141_67230            | [full]      | 66029 | No  | NA    | 15    | 1  | Low-quality    | Genome-fragment | NA              | 25.86 | 26.26 |       |
| 55_vs_k141_46296            | [0_partial] | 66760 | Yes | 49232 | 6     | 18 | Low-quality    | Genome-fragment | NA              | 19.45 | 81.47 |       |
| 56_vs_k141_19225            | [full]      | 68262 | Yes | 12650 | 5     | 30 | Low-quality    | Genome-fragment | NA              | 18.11 | 64.08 |       |
| 58_vs_k141_19188            | [full]      | 68392 | Yes | 24565 | 3     | 30 | Low-quality    | Genome-fragment | NA              | 44.13 | 0     |       |
| 59_extracted_k141_23590     |             | 68734 | No  | NA    | 13    | 4  | Low-quality    | Genome-fragment | NA              | 47.52 | 54.22 |       |
| 59_vs_k141_59237            | [full]      | 70048 | Yes | 32078 | 14    | 32 | Low-quality    | Genome-fragment | NA              | 4.06  | 93.33 |       |
| 58_vs_k141_18345            | [H2gene]    | 2145  | No  | NA    | 0     | 1  | Not-determined | Genome-fragment | NA              | 47.18 | 46.53 |       |
| 513_vs_44103                | [full]      | 71732 | Yes | 4788  | 3     | 41 | Low-quality    | Genome-fragment | NA              | 46.46 | 0     |       |
| 56_vs_k141_14664            | [full]      | 73483 | No  | NA    | 39291 | 12 | 20             | Low-quality     | Genome-fragment | NA    | 36.17 | 80.58 |
| 513_extracted_58022         |             | 74146 | No  | NA    | 21    | 1  | Low-quality    | Genome-fragment | NA              | 36.17 | 80.58 |       |
| 517_vs_k141_176943          | [full]      | 74469 | Yes | 31444 | 7     | 25 | Low-quality    | Genome-fragment | NA              | 18.72 | 0     |       |
| 58_vs_k141_144636           | [H2gene]    | 1568  | No  | NA    | 0     | 3  | Not-determined | Genome-fragment | NA              | 4.39  | 95.57 |       |
| 516_extracted_114510        |             | 75059 | No  | NA    | 4     | 0  | Low-quality    | Genome-fragment | NA              | 0     | 0     |       |
| 58_extracted_k141_92536     |             | 77195 | Yes | 3417  | 2     | 33 | Low-quality    | Genome-fragment | NA              | 35.94 | 0     |       |
| 58_vs_k141_58458            | [H2gene]    | 1538  | No  | NA    | 0     | 1  | Not-determined | Genome-fragment | NA              | 29.26 | 69.04 |       |
| 510_extracted_44505         |             | 77467 | No  | NA    | 1     | 10 | Low-quality    | Genome-fragment | NA              | 48.42 | 60.65 |       |
| 57_vs_84744                 | [full]      | 78218 | Yes | 24219 | 1     | 36 | Low-quality    | Genome-fragment | NA              | 36.17 | 80.58 |       |
| 517_vs_k141_106218          | [full]      | 79477 | Yes | 31273 | 13    | 27 | Low-quality    | Genome-fragment | NA              | 38.43 | 67.27 |       |
| 516_vs_49947                | [full]      | 79772 | Yes | 15492 | 5     | 17 | Low-quality    | Genome-fragment | NA              | 27.63 | 77.04 |       |
|                             |             |       |     |       |       |    |                |                 |                 |       |       |       |



| <b>Table S2-2. VLP_vOTUs_checkv</b>  | Count | Mean    | Median  | SD      |
|--------------------------------------|-------|---------|---------|---------|
| Complete (100% completeness)         | 193   | 62030.8 | 51608   | 40950.2 |
| High quality (90-100% completeness)  | 488   | 48150.1 | 41459.5 | 28976.3 |
| Medium quality (50-90% completeness) | 550   | 35293   | 28721.5 | 30273   |
| Low quality (<50% completeness)      | 21851 | 3602.8  | 2005    | 5622.5  |
| Undetermined                         | 31697 | 2728.2  | 1777    | 2995.7  |
| Total OTUs >= 1kb                    | 54779 | 30361.0 | 28721.5 | 16623.2 |
| Sum of 50-100% genome completeness   | 1231  | 48491.3 | 41459.5 | 6570.9  |
