# Supplementary material for: Investigating the Human Intestinal DNA Virome and Predicting Disease-Associated Virus–Host Interactions in Severe Myalgic Encephalomyelitis/Chronic Fatigue Syndrome (ME/CFS)
Source: MDPI journal article supplement (doi:10.3390/ijms242417267), 2023-12-08
Supplement: s1 [file s1]

Table S6. Viral taxonomic annotations

Table S6-1. VLP\_HQ\_vOTUs\_taxonomies

| Scaffold      | Cluster                               | Accession | Status    | VC        | Level | Weight | Host             | BaltimoreGroup | Realm         | Kingdom        | Phylum       | Class              | Order         | Family         | Subfamily    | Genus            |
|---------------|---------------------------------------|-----------|-----------|-----------|-------|--------|------------------|----------------|---------------|----------------|--------------|--------------------|---------------|----------------|--------------|------------------|
| S10_vf_18671  | Panbacteroides phage PDS1             | MN928097  | Clustered | VC_855_0  | C1    | 169    | Panbacteroides   | Group I        | Duplodnaviria | Heunggongvinae | Uroviricota  | Caudoviricetes     | n.a.          | Unclassified   | Unclassified | Unclassified     |
| S10_vf_24791  | Faecalibacterium phage FP_Epona       | MG711462  | Clustered | VC_723_0  | C2    | 95     | Faecalibacterium | Group I        | Duplodnaviria | Heunggongvinae | Uroviricota  | Caudoviricetes     | n.a.          | Unclassified   | Unclassified | Eponavirus       |
| S10_vf_25241  | n.a.                                  | n.a.      | Clustered | VC_1558_0 | F     | n.a.   | n.a.             | n.a.           | n.a.          | n.a.           | n.a.         | n.a.               | n.a.          | n.a.           | n.a.         | n.a.             |
| S10_vf_3644   | uncultured phage cr109_1              | MT774399  | Clustered | VC_519_7  | N2    | 277    | Unspecified      | Group I        | Duplodnaviria | Heunggongvinae | Uroviricota  | Caudoviricetes     | Crassvirales  | Suolviridae    | O            | O                |
| S10_vf_36880  | uncultured phage cr127_1              | MT774393  | Clustered | VC_693_0  | C1    | 105    | Unspecified      | Group I        | Duplodnaviria | Heunggongvinae | Uroviricota  | Caudoviricetes     | Crassvirales  | Cervaviridae   | Deltavirinae | Kahacivirus      |
| S10_vf_64371  | n.a.                                  | n.a.      | Clustered | VC_1564_0 | F     | n.a.   | n.a.             | n.a.           | n.a.          | n.a.           | n.a.         | n.a.               | n.a.          | n.a.           | n.a.         | n.a.             |
| S10_vf_80712  | n.a.                                  | n.a.      | Clustered | VC_219_0  | A     | n.a.   | n.a.             | n.a.           | n.a.          | n.a.           | n.a.         | n.a.               | n.a.          | n.a.           | n.a.         | n.a.             |
| S10_vs_120489 | n.a.                                  | n.a.      | Clustered | VC_1566_0 | A     | n.a.   | n.a.             | n.a.           | n.a.          | n.a.           | n.a.         | n.a.               | n.a.          | n.a.           | n.a.         | n.a.             |
| S10_vs_120541 | n.a.                                  | n.a.      | Clustered | VC_1607_0 | A     | n.a.   | n.a.             | n.a.           | n.a.          | n.a.           | n.a.         | n.a.               | n.a.          | n.a.           | n.a.         | n.a.             |
| S10_vs_14557  | Flavobacterium phage vB_FspS_Jahen6-1 | MN812211  | Clustered | VC_1062_0 | N5    | 6      | Flavobacterium   | Group I        | Duplodnaviria | Heunggongvinae | Uroviricota  | Caudoviricetes     | n.a.          | Duneviridae    | O            | O                |
| S10_vs_18901  | n.a.                                  | n.a.      | Clustered | VC_1291_0 | A     | n.a.   | n.a.             | n.a.           | n.a.          | n.a.           | n.a.         | n.a.               | n.a.          | n.a.           | n.a.         | n.a.             |
| S10_vs_2538   | Lactobacillus phage c5                | EU340421  | Clustered | VC_658_0  | N10   | 6      | Lactobacillus    | Group I        | Duplodnaviria | Heunggongvinae | Uroviricota  | Caudoviricetes     | n.a.          | Unclassified   | O            | O                |
| S10_vs_26365  | Faecalibacterium phage FP_oengus      | MG711463  | Clustered | VC_1085_1 | N20   | 67     | Faecalibacterium | Group I        | Duplodnaviria | Heunggongvinae | Uroviricota  | Caudoviricetes     | n.a.          | Unclassified   | O            | O                |
| S10_vs_35854  | Bacteroides phage LoVEphage           | MW600583  | Clustered | VC_1527_0 | N4    | 24     | Bacteroides      | Group I        | Duplodnaviria | Heunggongvinae | Uroviricota  | Caudoviricetes     | n.a.          | Unclassified   | O            | O                |
| S10_vs_36407  | n.a.                                  | n.a.      | Clustered | VC_1578_0 | A     | n.a.   | n.a.             | n.a.           | n.a.          | n.a.           | n.a.         | n.a.               | n.a.          | n.a.           | n.a.         | n.a.             |
| S10_vs_36598  | n.a.                                  | n.a.      | Clustered | VC_1579_0 | A     | n.a.   | n.a.             | n.a.           | n.a.          | n.a.           | n.a.         | n.a.               | n.a.          | n.a.           | n.a.         | n.a.             |
| S10_vs_43473  | Microviridae sp.                      | MG945488  | Clustered | VC_1334_0 | C1    | 19     | Unspecified      | Group II       | Monodnaviria  | Sangervirae    | Phixviricota | Malgrandaviricetes | Petitivirales | Microviridae   | Unclassified | Unclassified     |
| S10_vs_58014  | Bacteroides phage p00                 | BK010646  | Clustered | VC_695_0  | C2    | 93     | Bacteroides      | Group I        | Duplodnaviria | Heunggongvinae | Uroviricota  | Caudoviricetes     | n.a.          | Unclassified   | Unclassified | Unclassified     |
| S10_vs_67471  | n.a.                                  | n.a.      | Clustered | VC_990_0  | A     | n.a.   | n.a.             | n.a.           | n.a.          | n.a.           | n.a.         | n.a.               | n.a.          | n.a.           | n.a.         | n.a.             |
| S10_vs_71900  | n.a.                                  | n.a.      | Clustered | VC_1576_0 | A     | n.a.   | n.a.             | n.a.           | n.a.          | n.a.           | n.a.         | n.a.               | n.a.          | n.a.           | n.a.         | n.a.             |
| S11_vf_104035 | uncultured phage cr53_1               | MT774396  | Clustered | VC_519_0  | N2    | 233    | Unspecified      | Group I        | Duplodnaviria | Heunggongvinae | Uroviricota  | Caudoviricetes     | Crassvirales  | Suolviridae    | O            | O                |
| S11_vf_104044 | uncultured phage cr85_1               | MT774390  | Clustered | VC_1054_0 | C1    | 300    | Unspecified      | Group I        | Duplodnaviria | Heunggongvinae | Uroviricota  | Caudoviricetes     | Crassvirales  | Steigviridae   | Asinivirinae | Kahnovirus       |
| S11_vf_104048 | Akkermansia phage DTMo-2021a          | CP084202  | Clustered | VC_730_0  | N2    | 1      | Akkermansia      | Group I        | Duplodnaviria | Heunggongvinae | Uroviricota  | Caudoviricetes     | n.a.          | Unclassified   | O            | O                |
| S11_vf_104052 | Bacillus phage vB_BIS_BMBtp15         | KX119035  | Clustered | VC_739_0  | N6    | 9      | Bacillus         | Group I        | Duplodnaviria | Heunggongvinae | Uroviricota  | Caudoviricetes     | n.a.          | Unclassified   | O            | O                |
| S11_vf_104059 | uncultured phage cr110_1              | MT774386  | Clustered | VC_691_0  | C1    | 193    | Unspecified      | Group I        | Duplodnaviria | Heunggongvinae | Uroviricota  | Caudoviricetes     | Crassvirales  | Intestiviridae | Cnudevirinae | Delmidovirus     |
| S11_vf_104070 | Clostridium phage phiMMP01            | LN681541  | Clustered | VC_150_0  | N17   | 13     | Clostridium      | Group I        | Duplodnaviria | Heunggongvinae | Uroviricota  | Caudoviricetes     | n.a.          | Unclassified   | O            | O                |
| S11_vf_104071 | Croceibacter phage P259PY             | KC888701  | Clustered | VC_1045_0 | N2    | 16     | Croceibacter     | Group I        | Duplodnaviria | Heunggongvinae | Uroviricota  | Caudoviricetes     | n.a.          | Unclassified   | O            | O                |
| S11_vf_10007  | Staphylococcus phage PI-Septi-HB2     | MT880871  | Clustered | VC_739_0  | N11   | 3      | Staphylococcus   | Group I        | Duplodnaviria | Heunggongvinae | Uroviricota  | Caudoviricetes     | n.a.          | Unclassified   | O            | O                |
| S11_vf_13033  | Faecalibacterium phage FP_oengus      | MG711463  | Clustered | VC_1085_1 | N20   | 65     | Faecalibacterium | Group I        | Duplodnaviria | Heunggongvinae | Uroviricota  | Caudoviricetes     | n.a.          | Unclassified   | O            | O                |
| S11_vf_27845  | n.a.                                  | n.a.      | Clustered | VC_1564_0 | F     | n.a.   | n.a.             | n.a.           | n.a.          | n.a.           | n.a.         | n.a.               | n.a.          | n.a.           | n.a.         | n.a.             |
| S11_vf_28515  | Bacillus phage BUCT082                | MZ969646  | Clustered | VC_219_0  | N9    | 5      | Bacillus         | Group I        | Duplodnaviria | Heunggongvinae | Uroviricota  | Caudoviricetes     | n.a.          | Unclassified   | O            | O                |
| S11_vf_28645  | n.a.                                  | n.a.      | Clustered | VC_1558_0 | F     | n.a.   | n.a.             | n.a.           | n.a.          | n.a.           | n.a.         | n.a.               | n.a.          | n.a.           | n.a.         | n.a.             |
| S11_vf_34224  | Clostridium phage phiMMP01            | LN681541  | Clustered | VC_150_0  | N17   | 13     | Clostridium      | Group I        | Duplodnaviria | Heunggongvinae | Uroviricota  | Caudoviricetes     | n.a.          | Unclassified   | O            | O                |
| S11_vf_43997  | CrAssphage sp. O-152                  | MK069403  | Clustered | VC_691_0  | C1    | 131    | Unspecified      | Group I        | Duplodnaviria | Heunggongvinae | Uroviricota  | Caudoviricetes     | Crassvirales  | Unclassified   | Unclassified | Unclassified     |
| S11_vf_47632  | Butyrivibrio phage Idris              | MN882554  | Clustered | VC_1289_0 | N7    | 31     | Butyrivibrio     | Group I        | Duplodnaviria | Heunggongvinae | Uroviricota  | Caudoviricetes     | n.a.          | Unclassified   | O            | O                |
| S11_vf_66160  | Roseburia phage Shimadzu              | LR506903  | Clustered | VC_1256_0 | N5    | 4      | Roseburia        | Group I        | Duplodnaviria | Heunggongvinae | Uroviricota  | Caudoviricetes     | n.a.          | Unclassified   | O            | O                |
| S11_vf_66522  | Actinomyces phage LC001               | ON920540  | Clustered | VC_1435_0 | C1    | 131    | Actinomyces      | Group I        | Duplodnaviria | Heunggongvinae | Uroviricota  | Caudoviricetes     | n.a.          | Unclassified   | Unclassified | Unclassified     |
| S11_vf_68693  | n.a.                                  | n.a.      | Clustered | VC_1559_0 | A     | n.a.   | n.a.             | n.a.           | n.a.          | n.a.           | n.a.         | n.a.               | n.a.          | n.a.           | n.a.         | n.a.             |
| S11_vf_84303  | n.a.                                  | n.a.      | Clustered | VC_1552_0 | A     | n.a.   | n.a.             | n.a.           | n.a.          | n.a.           | n.a.         | n.a.               | n.a.          | n.a.           | n.a.         | n.a.             |
| S11_vf_92391  | n.a.                                  | n.a.      | Clustered | VC_1585_0 | A     | n.a.   | n.a.             | n.a.           | n.a.          | n.a.           | n.a.         | n.a.               | n.a.          | n.a.           | n.a.         | n.a.             |
| S11_vf_95067  | n.a.                                  | n.a.      | Clustered | VC_1552_0 | A     | n.a.   | n.a.             | n.a.           | n.a.          | n.a.           | n.a.         | n.a.               | n.a.          | n.a.           | n.a.         | n.a.             |
| S11_vs_10172  | Faecalibacterium phage FP_Epona       | MG711462  | Clustered | VC_723_0  | C13   | 55     | Faecalibacterium | Group I        | Duplodnaviria | Heunggongvinae | Uroviricota  | Caudoviricetes     | n.a.          | Unclassified   | Unclassified | Eponavirus       |
| S11_vs_104032 | Bdellovibrio phage phi1422            | JQ177062  | Clustered | VC_940_0  | C1    | 26     | Bdellovibrio     | Group I        | Duplodnaviria | Heunggongvinae | Uroviricota  | Caudoviricetes     | n.a.          | Unclassified   | Unclassified | Unclassified     |
| S11_vs_104038 | Bacillus phage vB_BIS_BMBtp13         | KX119032  | Clustered | VC_607_0  | C4    | 10     | Bacillus         | Group I        | Duplodnaviria | Heunggongvinae | Uroviricota  | Caudoviricetes     | n.a.          | Unclassified   | Unclassified | Unclassified     |
| S11_vs_104041 | Clostridioides phage CD1801           | MW512570  | Clustered | VC_669_0  | N4    | 5      | Clostridioides   | Group I        | Duplodnaviria | Heunggongvinae | Uroviricota  | Caudoviricetes     | n.a.          | Unclassified   | O            | O                |
| S11_vs_104047 | Streptococcus phage D4446             | MN938931  | Clustered | VC_643_0  | N8    | 9      | Streptococcus    | Group I        | Duplodnaviria | Heunggongvinae | Uroviricota  | Caudoviricetes     | n.a.          | Unclassified   | O            | O                |
| S11_vs_104053 | Paenibacillus phage PGI               | HQ332138  | Clustered | VC_946_0  | N10   | 2      | Paenibacillus    | Group I        | Duplodnaviria | Heunggongvinae | Uroviricota  | Caudoviricetes     | n.a.          | Unclassified   | O            | O                |
| S11_vs_104054 | n.a.                                  | n.a.      | Clustered | VC_1607_0 | A     | n.a.   | n.a.             | n.a.           | n.a.          | n.a.           | n.a.         | n.a.               | n.a.          | n.a.           | n.a.         | n.a.             |
| S11_vs_104064 | Faecalibacterium phage FP_oengus      | MG711463  | Clustered | VC_1085_1 | N19   | 69     | Faecalibacterium | Group I        | Duplodnaviria | Heunggongvinae | Uroviricota  | Caudoviricetes     | n.a.          | Unclassified   | O            | O                |
| S11_vs_11267  | Geobacillus phage GBSV1               | DQ340064  | Clustered | VC_778_0  | N24   | 8      | Geobacillus      | Group I        | Duplodnaviria | Heunggongvinae | Uroviricota  | Caudoviricetes     | n.a.          | Unclassified   | O            | O                |
| S11_vs_11994  | Faecalibacterium phage FP_Tannisi     | MG711467  | Clustered | VC_732_0  | N3    | 96     | Faecalibacterium | Group I        | Duplodnaviria | Heunggongvinae | Uroviricota  | Caudoviricetes     | n.a.          | Unclassified   | O            | O                |
| S11_vs_14882  | n.a.                                  | n.a.      | Clustered | VC_1570_0 | A     | n.a.   | n.a.             | n.a.           | n.a.          | n.a.           | n.a.         | n.a.               | n.a.          | n.a.           | n.a.         | n.a.             |
| S11_vs_1937   | Phage vB_RanS_PJN03                   | QN245412  | Clustered | VC_951_0  | N13   | 6      | Unspecified      | Group I        | Duplodnaviria | Heunggongvinae | Uroviricota  | Caudoviricetes     | n.a.          | Unclassified   | O            | O                |
| S11_vs_19892  | Faecalibacterium phage FP_Epona       | MG711462  | Clustered | VC_723_0  | C13   | 50     | Faecalibacterium | Group I        | Duplodnaviria | Heunggongvinae | Uroviricota  | Caudoviricetes     | n.a.          | Unclassified   | Unclassified | Eponavirus       |
| S11_vs_23188  | n.a.                                  | n.a.      | Clustered | VC_1559_0 | A     | n.a.   | n.a.             | n.a.           | n.a.          | n.a.           | n.a.         | n.a.               | n.a.          | n.a.           | n.a.         | n.a.             |
| S11_vs_23357  | Faecalibacterium phage FP_Epona       | MG711462  | Clustered | VC_723_0  | C13   | 52     | Faecalibacterium | Group I        | Duplodnaviria | Heunggongvinae | Uroviricota  | Caudoviricetes     | n.a.          | Unclassified   | Unclassified | Eponavirus       |
| S11_vs_26767  | Streptococcus phage MismyG            | OL774867  | Clustered | VC_152_0  | N13   | 9      | Streptococcus    | Group I        | Duplodnaviria | Heunggongvinae | Uroviricota  | Caudoviricetes     | n.a.          | Unclassified   | O            | O                |
| S11_vs_30739  | Faecalibacterium phage FP_Lagaffi     | MG711461  | Clustered | VC_1289_0 | N24   | 3      | Faecalibacterium | Group I        | Duplodnaviria | Heunggongvinae | Uroviricota  | Caudoviricetes     | n.a.          | Unclassified   | O            | O                |
| S11_vs_3277   | Bacteroides phage p00                 | BK010646  | Clustered | VC_695_0  | C4    | 43     | Bacteroides      | Group I        | Duplodnaviria | Heunggongvinae | Uroviricota  | Caudoviricetes     | n.a.          | Unclassified   | Unclassified | Unclassified     |
| S11_vs_34137  | Geobacillus phage GBSV1               | DQ340064  | Clustered | VC_779_0  | N25   | 6      | Geobacillus      | Group I        | Duplodnaviria | Heunggongvinae | Uroviricota  | Caudoviricetes     | n.a.          | Unclassified   | O            | O                |
| S11_vs_37666  | Clostridium phage HM2                 | LT600745  | Clustered | VC_1288_0 | N48   | 4      | Clostridium      | Group I        | Duplodnaviria | Heunggongvinae | Uroviricota  | Caudoviricetes     | n.a.          | Salasmaviridae | O            | O                |
| S11_vs_40945  | Faecalibacterium phage FP_Epona       | MG711462  | Clustered | VC_723_0  | C13   | 55     | Faecalibacterium | Group I        | Duplodnaviria | Heunggongvinae | Uroviricota  | Caudoviricetes     | n.a.          | Unclassified   | Unclassified | Eponavirus       |
| S11_vs_41107  | Clostridium phage phiMMP01            | LN681541  | Clustered | VC_151_0  | N20   | 16     | Clostridium      | Group I        | Duplodnaviria | Heunggongvinae | Uroviricota  | Caudoviricetes     | n.a.          | Unclassified   | O            | O                |
| S11_vs_42927  | Streptococcus phage Javan630          | MK448997  | Clustered | VC_649_1  | C1    | 104    | Streptococcus    | Group I        | Duplodnaviria | Heunggongvinae | Uroviricota  | Caudoviricetes     | n.a.          | Unclassified   | Unclassified | Unclassified     |
| S11_vs_5077   | Escherichia phage ESS12_cv015         | LR576649  | Clustered | VC_5_0    | C1    | 115    | Escherichia      | Group I        | Duplodnaviria | Heunggongvinae | Uroviricota  | Caudoviricetes     | n.a.          | Petkoviridae   | Unclassified | Quadrangitavirus |
| S11_vs_52577  | Faecalibacterium phage FP_Mushu       | MG711460  | Clustered | VC_1288_0 | C1    | 145    | Faecalibacterium | Group I        | Duplodnaviria | Heunggongvinae | Uroviricota  | Caudoviricetes     | n.a.          | Unclassified   | Unclassified | Mushuvirus       |
| S11_vs_58702  | Clostridium phage phiMMP01            | LN681541  | Clustered | VC_151_0  | N17   | 32     | Clostridium      | Group I        | Duplodnaviria | Heunggongvinae | Uroviricota  | Caudoviricetes     | n.a.          | Unclassified   | O            | O                |
| S11_vs_58930  | Bacteroides phage p00                 | BK010646  | Clustered | VC_695_0  | C3    | 46     | Bacteroides      | Group I        | Duplodnaviria | Heunggongvinae | Uroviricota  | Caudoviricetes     | n.a.          | Unclassified   | Unclassified | Unclassified     |
| S11_vs_62573  | Roseburia phage Shimadzu              | LR506903  | Clustered | VC_1256_0 | N5    | 2      | Roseburia        | Group I        | Duplodnaviria | Heunggongvinae | Uroviricota  | Caudoviricetes     | n.a.          | Unclassified   | O            | O                |
| S11_vs_6458   | n.a.                                  | n.a.      | Clustered | VC_1595_0 | A     | n.a.   | n.a.             | n.a.           | n.a.          | n.a.           | n.a.         | n.a.               | n.a.          | n.a.           | n.a.         | n.a.             |
| S11_vs_68151  | Faecalibacterium phage FP_oengus      | MG711463  | Clustered | VC_1085_1 | N19   | 65     | Faecalibacterium | Group I        | Duplodnaviria | Heunggongvinae | Uroviricota  | Caudoviricetes     | n.a.          | Unclassified   | O            | O                |
| S11_vs_76784  | Streptococcus phage Javan580          | MK448989  | Clustered | VC_558_0  | N12   | 8      | Streptococcus    | Group I        | Duplodnaviria | Heunggongvinae | Uroviricota  | Caudoviricetes     | n.a.          | Unclassified   | O            | O                |
| S11_vs_79275  | n.a.                                  | n.a.      | Clustered | VC_1570_0 | A     | n.a.   | n.a.             | n.a.           | n.a.          | n.a.           | n.a.         | n.a.               | n.a.          | n.a.           | n.a.         | n.a.             |
| S11_vs_81775  | Bacillus phage vB_BIS_BMBtp13         | KX119032  | Clustered | VC_607_0  | C4    | 10     | Bacillus         | Group I        | Duplodnaviria | Heunggongvinae | Uroviricota  | Caudoviricetes     | n.a.          | Unclassified   | Unclassified | Unclassified     |
| S11_vs_8456   | Calidibacillus phage CBP1             | MF595878  | Clustered | VC_349_0  | C2    | 5      | Calidibacillus   | Group I        | Duplodnaviria | Heunggongvinae | Uroviricota  | Caudoviricetes     | n.a.          | Unclassified   | Unclassified | Unclassified     |
| S11_vs_84607  | n.a.                                  | n.a.      | Clustered | VC_1596_0 | A     | n.a.   | n.a.             | n.a.           | n.a.          | n.a.           | n.a.         | n.a.               | n.a.          | n.a.           | n.a.         | n.a.             |
| S11_vs_84848  | Bacteroides phage p00                 | BK010646  | Clustered | VC_695_0  | C1    | 73     | Bacteroides      | Group I        | Duplodnaviria | Heunggongvinae | Uroviricota  | Caudoviricetes     | n.a.          | Unclassified   | Unclassified | Unclassified     |
| S11_vs_93101  | Bdellovibrio phage phi1402            | JF347409  | Clustered | VC_967_0  | C4    | 37     | Bdellovibrio     | Group I        | Duplodnaviria | Heunggongvinae | Uroviricota  | Caudoviricetes     | n.a.          | Unclassified   | Unclassified | Unclassified     |

|               |                                   |          |           |           |     |      |                  |              |               |               |                |                    |               |                   |              |              |
|---------------|-----------------------------------|----------|-----------|-----------|-----|------|------------------|--------------|---------------|---------------|----------------|--------------------|---------------|-------------------|--------------|--------------|
| S11_vs_98193  | Bacteroides phage p00             | BK010646 | Clustered | VC_695_0  | C6  | 22   | Bacteroides      | Group I      | Duplodnaviria | Heunggongvine | Urovincota     | Caudoviricetes     | n.a.          | Unclassified      | Unclassified | Unclassified |
| S12_vf_10887  | n.a.                              | n.a.     | Clustered | VC_1597_0 | F   | n.a. | n.a.             | n.a.         | n.a.          | n.a.          | n.a.           | n.a.               | n.a.          | n.a.              | n.a.         | n.a.         |
| S12_vf_128794 | n.a.                              | n.a.     | Clustered | VC_1552_0 | A   | n.a. | n.a.             | n.a.         | n.a.          | n.a.          | n.a.           | n.a.               | n.a.          | n.a.              | n.a.         | n.a.         |
| S12_vf_169796 | Bacillus phage vB_BcoS-136        | MH884508 | Clustered | VC_491_0  | N22 | 2    | Bacillus         | Group I      | Duplodnaviria | Heunggongvine | Urovincota     | Caudoviricetes     | n.a.          | Unclassified      | O            | O            |
| S12_vf_173208 | n.a.                              | n.a.     | Clustered | VC_1274_0 | A   | n.a. | n.a.             | n.a.         | n.a.          | n.a.          | n.a.           | n.a.               | n.a.          | n.a.              | n.a.         | n.a.         |
| S12_vf_174374 | n.a.                              | n.a.     | Clustered | VC_1576_0 | A   | n.a. | n.a.             | n.a.         | n.a.          | n.a.          | n.a.           | n.a.               | n.a.          | n.a.              | n.a.         | n.a.         |
| S12_vf_176437 | Clostridium phage HM2             | LT600745 | Clustered | VC_1261_0 | N43 | 4    | Clostridium      | Group I      | Duplodnaviria | Heunggongvine | Urovincota     | Caudoviricetes     | n.a.          | Salasmaviridae    | O            | O            |
| S12_vf_181024 | Bacillus phage BUCT082            | MZ696646 | Clustered | VC_1040_0 | N19 | 1    | Bacillus         | Group I      | Duplodnaviria | Heunggongvine | Urovincota     | Caudoviricetes     | n.a.          | Unclassified      | O            | O            |
| S12_vf_188822 | n.a.                              | n.a.     | Clustered | VC_1597_0 | F   | n.a. | n.a.             | n.a.         | n.a.          | n.a.          | n.a.           | n.a.               | n.a.          | n.a.              | n.a.         | n.a.         |
| S12_vf_188824 | Phage DP_SC_6_H4_2017             | MTI21964 | Clustered | VC_1490_0 | N7  | 121  | Unspecified      | Group I      | Duplodnaviria | Heunggongvine | Urovincota     | Caudoviricetes     | n.a.          | Unclassified      | O            | O            |
| S12_vf_188830 | n.a.                              | n.a.     | Clustered | VC_1598_0 | F   | n.a. | n.a.             | n.a.         | n.a.          | n.a.          | n.a.           | n.a.               | n.a.          | n.a.              | n.a.         | n.a.         |
| S12_vf_188838 | Inovirus sp.                      | MTI35293 | Clustered | VC_1495_0 | C1  | 12   | Unspecified      | Group II     | Monodnaviria  | Loebvirae     | Hofneiviricota | Faserviricetes     | Tubulavirales | Inoviridae        | Unclassified | Inovirus     |
| S12_vf_48278  | Myoviridae sp.                    | MW202455 | Clustered | VC_439_0  | N3  | 3    | Unspecified      | Group I      | Duplodnaviria | Heunggongvine | Urovincota     | Caudoviricetes     | n.a.          | Unclassified      | O            | O            |
| S12_vf_55175  | Faecalibacterium phage FP_Lagaffe | MG711461 | Clustered | VC_1290_0 | N30 | 3    | Faecalibacterium | Group I      | Duplodnaviria | Heunggongvine | Urovincota     | Caudoviricetes     | n.a.          | Unclassified      | O            | O            |
| S12_vf_60224  | Phage vB_RanS_PJN03               | QN245412 | Clustered | VC_950_0  | N14 | 7    | Unspecified      | Group I      | Duplodnaviria | Heunggongvine | Urovincota     | Caudoviricetes     | n.a.          | Unclassified      | O            | O            |
| S12_vf_69136  | Phage vB_RanS_PJN03               | QN245412 | Clustered | VC_950_0  | N14 | 4    | Unspecified      | Group I      | Duplodnaviria | Heunggongvine | Urovincota     | Caudoviricetes     | n.a.          | Unclassified      | O            | O            |
| S12_vf_79666  | n.a.                              | n.a.     | Clustered | VC_1552_0 | A   | n.a. | n.a.             | n.a.         | n.a.          | n.a.          | n.a.           | n.a.               | n.a.          | n.a.              | n.a.         | n.a.         |
| S12_vs_106329 | Geobacillus phage GBSV1           | DQ340064 | Clustered | VC_779_0  | N44 | 1    | Geobacillus      | Group I      | Duplodnaviria | Heunggongvine | Urovincota     | Caudoviricetes     | n.a.          | Unclassified      | O            | O            |
| S12_vs_111815 | n.a.                              | n.a.     | Clustered | VC_1553_0 | A   | n.a. | n.a.             | n.a.         | n.a.          | n.a.          | n.a.           | n.a.               | n.a.          | n.a.              | n.a.         | n.a.         |
| S12_vs_121913 | n.a.                              | n.a.     | Clustered | VC_1582_0 | A   | n.a. | n.a.             | n.a.         | n.a.          | n.a.          | n.a.           | n.a.               | n.a.          | n.a.              | n.a.         | n.a.         |
| S12_vs_137069 | n.a.                              | n.a.     | Clustered | VC_1601_0 | F   | n.a. | n.a.             | n.a.         | n.a.          | n.a.          | n.a.           | n.a.               | n.a.          | n.a.              | n.a.         | n.a.         |
| S12_vs_138261 | n.a.                              | n.a.     | Clustered | VC_1583_0 | A   | n.a. | n.a.             | n.a.         | n.a.          | n.a.          | n.a.           | n.a.               | n.a.          | n.a.              | n.a.         | n.a.         |
| S12_vs_141337 | Bacteroides phage p00             | BK010646 | Clustered | VC_695_0  | C1  | 127  | Bacteroides      | Group I      | Duplodnaviria | Heunggongvine | Urovincota     | Caudoviricetes     | n.a.          | Unclassified      | Unclassified | Unclassified |
| S12_vs_14927  | uncultured phage cr3_1            | MT774381 | Clustered | VC_691_0  | C1  | 165  | Unspecified      | Group I      | Duplodnaviria | Heunggongvine | Urovincota     | Caudoviricetes     | Crassvirales  | Intestiviridae    | Caudovirinae | Dorhovirus   |
| S12_vs_150812 | Clostridium phage phiMMP01        | LN681541 | Clustered | VC_151_0  | N18 | 25   | Clostridium      | Group I      | Duplodnaviria | Heunggongvine | Urovincota     | Caudoviricetes     | n.a.          | Unclassified      | O            | O            |
| S12_vs_151292 | Bacteroides phage LoVEphage       | MW660583 | Clustered | VC_1526_0 | C2  | 199  | Bacteroides      | Group I      | Duplodnaviria | Heunggongvine | Urovincota     | Caudoviricetes     | n.a.          | Unclassified      | Unclassified | Unclassified |
| S12_vs_163990 | Faecalibacterium phage FP_oengus  | MG711463 | Clustered | VC_1085_1 | N18 | 66   | Faecalibacterium | Group I      | Duplodnaviria | Heunggongvine | Urovincota     | Caudoviricetes     | n.a.          | Unclassified      | O            | O            |
| S12_vs_183752 | Clostridium phage HM2             | LT600745 | Clustered | VC_1261_0 | N43 | 4    | Clostridium      | Group I      | Duplodnaviria | Heunggongvine | Urovincota     | Caudoviricetes     | n.a.          | Salasmaviridae    | O            | O            |
| S12_vs_183891 | n.a.                              | n.a.     | Clustered | VC_1603_0 | F   | n.a. | n.a.             | n.a.         | n.a.          | n.a.          | n.a.           | n.a.               | n.a.          | n.a.              | n.a.         | n.a.         |
| S12_vs_188820 | n.a.                              | n.a.     | Clustered | VC_1553_0 | A   | n.a. | n.a.             | n.a.         | n.a.          | n.a.          | n.a.           | n.a.               | n.a.          | n.a.              | n.a.         | n.a.         |
| S12_vs_188821 | Faecalibacterium phage FP_oengus  | MG711463 | Clustered | VC_1085_1 | N15 | 79   | Faecalibacterium | Group I      | Duplodnaviria | Heunggongvine | Urovincota     | Caudoviricetes     | n.a.          | Unclassified      | O            | O            |
| S12_vs_188823 | n.a.                              | n.a.     | Clustered | VC_1566_0 | A   | n.a. | n.a.             | n.a.         | n.a.          | n.a.          | n.a.           | n.a.               | n.a.          | n.a.              | n.a.         | n.a.         |
| S12_vs_188828 | n.a.                              | n.a.     | Clustered | VC_1568_0 | A   | n.a. | n.a.             | n.a.         | n.a.          | n.a.          | n.a.           | n.a.               | n.a.          | n.a.              | n.a.         | n.a.         |
| S12_vs_188832 | Tortoise microvirus 9             | MK765559 | Clustered | VC_1161_0 | C1  | 9    | Unspecified      | Group II     | Monodnaviria  | Sangervirae   | Phixviricota   | Malgrandaviricetes | Petitvirales  | Microviridae      | Unclassified | Unclassified |
| S12_vs_188833 | n.a.                              | n.a.     | Clustered | VC_1274_0 | A   | n.a. | n.a.             | n.a.         | n.a.          | n.a.          | n.a.           | n.a.               | n.a.          | n.a.              | n.a.         | n.a.         |
| S12_vs_23796  | Bacteroides phage p00             | BK010646 | Clustered | VC_695_0  | C3  | 48   | Bacteroides      | Group I      | Duplodnaviria | Heunggongvine | Urovincota     | Caudoviricetes     | n.a.          | Unclassified      | Unclassified | Unclassified |
| S12_vs_26336  | n.a.                              | n.a.     | Clustered | VC_1605_0 | A   | n.a. | n.a.             | n.a.         | n.a.          | n.a.          | n.a.           | n.a.               | n.a.          | n.a.              | n.a.         | n.a.         |
| S12_vs_48045  | Exiguobacterium phage vB_EauM-23  | MH844558 | Clustered | VC_145_0  | C2  | 24   | Exiguobacterium  | Group I      | Duplodnaviria | Heunggongvine | Urovincota     | Caudoviricetes     | n.a.          | Unclassified      | Unclassified | Unclassified |
| S12_vs_58560  | Faecalibacterium phage FP_oengus  | MG711463 | Clustered | VC_1085_1 | N20 | 40   | Faecalibacterium | Group I      | Duplodnaviria | Heunggongvine | Urovincota     | Caudoviricetes     | n.a.          | Unclassified      | O            | O            |
| S12_vs_5857   | Bacillus phage vB_BIS_BMBtp13     | KC130832 | Clustered | VC_1230_0 | N12 | 5    | Bacillus         | Group I      | Duplodnaviria | Heunggongvine | Urovincota     | Caudoviricetes     | n.a.          | Unclassified      | O            | O            |
| S12_vs_6836   | Clostridium phage phiMMP01        | LN681541 | Clustered | VC_151_0  | N10 | 26   | Clostridium      | Group I      | Duplodnaviria | Heunggongvine | Urovincota     | Caudoviricetes     | n.a.          | Unclassified      | O            | O            |
| S12_vs_71525  | n.a.                              | n.a.     | Clustered | VC_1606_0 | A   | n.a. | n.a.             | n.a.         | n.a.          | n.a.          | n.a.           | n.a.               | n.a.          | n.a.              | n.a.         | n.a.         |
| S12_vs_79785  | Clostridium phage phiMMP01        | LN681541 | Clustered | VC_151_0  | N21 | 23   | Clostridium      | Group I      | Duplodnaviria | Heunggongvine | Urovincota     | Caudoviricetes     | n.a.          | Unclassified      | O            | O            |
| S12_vs_86928  | Akkermansia phage DTMo-2021a      | CF084202 | Clustered | VC_752_0  | N2  | 7    | Akkermansia      | Group I      | Duplodnaviria | Heunggongvine | Urovincota     | Caudoviricetes     | n.a.          | Unclassified      | O            | O            |
| S12_vs_92968  | Faecalibacterium phage FP_oengus  | MG711463 | Clustered | VC_1085_1 | N18 | 72   | Faecalibacterium | Group I      | Duplodnaviria | Heunggongvine | Urovincota     | Caudoviricetes     | n.a.          | Unclassified      | O            | O            |
| S12_vs_93357  | Acetobacter phage phiA01          | LC264971 | Clustered | VC_383_0  | N4  | 18   | Acetobacter      | Group I      | Duplodnaviria | Heunggongvine | Urovincota     | Caudoviricetes     | n.a.          | Unclassified      | O            | O            |
| S12_vs_99092  | Geobacillus phage GBSV1           | DQ340064 | Clustered | VC_778_0  | N35 | 6    | Geobacillus      | Group I      | Duplodnaviria | Heunggongvine | Urovincota     | Caudoviricetes     | n.a.          | Unclassified      | O            | O            |
| S13_vf_109235 | n.a.                              | n.a.     | Clustered | VC_1552_0 | A   | n.a. | n.a.             | n.a.         | n.a.          | n.a.          | n.a.           | n.a.               | n.a.          | n.a.              | n.a.         | n.a.         |
| S13_vf_11246  | uncultured phage cr53_1           | MT774396 | Clustered | VC_519_0  | N2  | 225  | Unspecified      | Group I      | Duplodnaviria | Heunggongvine | Urovincota     | Caudoviricetes     | Crassvirales  | Suoliviridae      | O            | O            |
| S13_vf_131208 | Clostridium phage HM2             | LT600745 | Clustered | VC_1261_0 | N40 | 4    | Clostridium      | Group I      | Duplodnaviria | Heunggongvine | Urovincota     | Caudoviricetes     | n.a.          | Salasmaviridae    | O            | O            |
| S13_vf_143422 | uncultured phage cr10_1           | MT774382 | Clustered | VC_519_11 | C3  | 112  | Unspecified      | Group I      | Duplodnaviria | Heunggongvine | Urovincota     | Caudoviricetes     | Crassvirales  | Suoliviridae      | Boovirinae   | Canhaviruses |
| S13_vf_150407 | Inovirus sp.                      | MTI35292 | Clustered | VC_495_0  | C1  | 23   | Unspecified      | Group II     | Monodnaviria  | Loebvirae     | Hofneiviricota | Faserviricetes     | Tubulavirales | Inoviridae        | Unclassified | Inovirus     |
| S13_vf_151045 | Phage DP_SC_6_H4_2017             | MTI21964 | Clustered | VC_1490_0 | N6  | 122  | Unspecified      | Group I      | Duplodnaviria | Heunggongvine | Urovincota     | Caudoviricetes     | n.a.          | Unclassified      | O            | O            |
| S13_vf_151755 | Delthia phage IME-DE1             | KR153873 | Clustered | VC_86_0   | N3  | 6    | Delthia          | Group I      | Duplodnaviria | Heunggongvine | Urovincota     | Caudoviricetes     | n.a.          | Autographiviridae | O            | O            |
| S13_vf_22175  | Exiguobacterium phage vB_EauS-123 | KU160495 | Clustered | VC_779_0  | N38 | 3    | Exiguobacterium  | Group I      | Duplodnaviria | Heunggongvine | Urovincota     | Caudoviricetes     | n.a.          | Unclassified      | O            | O            |
| S13_vf_28309  | Clostridium phage HM2             | LT600745 | Clustered | VC_1258_0 | N39 | 4    | Clostridium      | Group I      | Duplodnaviria | Heunggongvine | Urovincota     | Caudoviricetes     | n.a.          | Salasmaviridae    | O            | O            |
| S13_vf_50074  | Phage DP_SC_6_H4_2017             | MTI21964 | Clustered | VC_1490_1 | C3  | 269  | Unspecified      | Group I      | Duplodnaviria | Heunggongvine | Urovincota     | Caudoviricetes     | n.a.          | Unclassified      | Unclassified | Unclassified |
| S13_vf_7670   | n.a.                              | n.a.     | Clustered | VC_1598_0 | F   | n.a. | n.a.             | n.a.         | n.a.          | n.a.          | n.a.           | n.a.               | n.a.          | n.a.              | n.a.         | n.a.         |
| S13_vf_87873  | Pantbacteroides phage PDS1        | MN929097 | Clustered | VC_855_0  | C4  | 115  | Pantbacteroides  | Group I      | Duplodnaviria | Heunggongvine | Urovincota     | Caudoviricetes     | n.a.          | Unclassified      | Unclassified | Unclassified |
| S13_vs_113593 | Bifidobacterium phage BitterVaud1 | MT06236  | Clustered | VC_826_0  | C1  | 52   | Bifidobacterium  | Group I      | Duplodnaviria | Heunggongvine | Urovincota     | Caudoviricetes     | n.a.          | Unclassified      | Unclassified | Unclassified |
| S13_vs_121307 | n.a.                              | n.a.     | Clustered | VC_905_0  | A   | n.a. | n.a.             | n.a.         | n.a.          | n.a.          | n.a.           | n.a.               | n.a.          | n.a.              | n.a.         | n.a.         |
| S13_vs_12957  | Bacteriophage sp.                 | OP549880 | Clustered | VC_1549_0 | N5  | 13   | Unspecified      | Unclassified | Unclassified  | n.a.          | n.a.           | n.a.               | n.a.          | n.a.              | O            | O            |
| S13_vs_148294 | Streptococcus phage Javan336      | MK448910 | Clustered | VC_152_0  | N13 | 7    | Streptococcus    | Group I      | Duplodnaviria | Heunggongvine | Urovincota     | Caudoviricetes     | n.a.          | Unclassified      | O            | O            |
| S13_vs_151510 | uncultured phage cr128_1          | MT774392 | Clustered | VC_1054_0 | C1  | 175  | Unspecified      | Group I      | Duplodnaviria | Heunggongvine | Urovincota     | Caudoviricetes     | Crassvirales  | Steigviridae      | Asinivirinae | Mahlaviruses |
| S13_vs_152223 | Bifidobacterium phage BitterVaud1 | MT06236  | Clustered | VC_826_0  | C1  | 30   | Bifidobacterium  | Group I      | Duplodnaviria | Heunggongvine | Urovincota     | Caudoviricetes     | n.a.          | Unclassified      | Unclassified | Unclassified |
| S13_vs_15645  | Cellulophaga phage phi17:2        | KC821609 | Clustered | VC_1055_0 | N8  | 6    | Cellulophaga     | Group I      | Duplodnaviria | Heunggongvine | Urovincota     | Caudoviricetes     | n.a.          | Unclassified      | O            | O            |
| S13_vs_23314  | Streptococcus phage Javan191      | MK448700 | Clustered | VC_649_1  | C2  | 72   | Streptococcus    | Group I      | Duplodnaviria | Heunggongvine | Urovincota     | Caudoviricetes     | n.a.          | Unclassified      | Unclassified | Unclassified |
| S13_vs_30101  | Streptococcus phage Javan630      | MK448997 | Clustered | VC_649_3  | N6  | 37   | Streptococcus    | Group I      | Duplodnaviria | Heunggongvine | Urovincota     | Caudoviricetes     | n.a.          | Unclassified      | O            | O            |
| S13_vs_30167  | Streptococcus phage Javan630      | MK448997 | Clustered | VC_649_2  | N3  | 71   | Streptococcus    | Group I      | Duplodnaviria | Heunggongvine | Urovincota     | Caudoviricetes     | n.a.          | Unclassified      | O            | O            |
| S13_vs_33947  | n.a.                              | n.a.     | Clustered | VC_1291_0 | A   | n.a. | n.a.             | n.a.         | n.a.          | n.a.          | n.a.           | n.a.               | n.a.          | n.a.              | n.a.         | n.a.         |
| S13_vs_35816  | Faecalibacterium phage FP_Lagaffe | MG711461 | Clustered | VC_727_0  | C4  | 107  | Faecalibacterium | Group I      | Duplodnaviria | Heunggongvine | Urovincota     | Caudoviricetes     | n.a.          | Unclassified      | Unclassified | Lagaffevirus |
| S13_vs_67429  | n.a.                              | n.a.     | Clustered | VC_153_0  | A   | n.a. | n.a.             | n.a.         | n.a.          | n.a.          | n.a.           | n.a.               | n.a.          | n.a.              | n.a.         | n.a.         |
| S13_vs_68102  | Bacillus phage vB_BsuP-Goe1       | KJ831549 | Clustered | VC_847_0  | N5  | 7    | Bacillus         | Group I      | Duplodnaviria | Heunggongvine | Urovincota     | Caudoviricetes     | n.a.          | Salasmaviridae    | O            | O            |
| S13_vs_83447  | n.a.                              | n.a.     | Clustered | VC_1565_0 | A   | n.a. | n.a.             | n.a.         | n.a.          | n.a.          | n.a.           | n.a.               | n.a.          | n.a.              | n.a.         | n.a.         |
| S13_vs_87108  | n.a.                              | n.a.     | Clustered | VC_1607_0 | F   | n.a. | n.a.             | n.a.         | n.a.          | n.a.          | n.a.           | n.a.               | n.a.          | n.a.              | n.a.         | n.a.         |
| S13_vs_90967  | Tortoise microvirus 19            | MK765569 | Clustered | VC_1300_0 | N4  | 5    | Unspecified      | Group II     | Monodnaviria  | Sangervirae   | Phixviricota   | Malgrandaviricetes | Petitvirales  | Microviridae      | O            | O            |
| S13_vs_9438   | n.a.                              | n.a.     | Clustered | VC_1596_0 | A   | n.a. | n.a.             | n.a.         | n.a.          | n.a.          | n.a.           | n.a.               | n.a.          | n.a.              | n.a.         | n.a.         |
| S13_vs_98591  | Myoviridae sp.                    | MW202455 | Clustered | VC_439_0  | N3  | 5    | Unspecified      | Group I      | Duplodnaviria | Heunggongvine | Urovincota     | Caudoviricetes     | n.a.          | Unclassified      | O            | O            |
| S14_vf_106156 | Lactobacillus phage JNU_P11       | MN830257 | Clustered | VC_275_0  | C1  | 88   | Lactobacillus    | Group I      | Duplodnaviria | Heunggongvine | Urovincota     | Caudoviricetes     | n.a.          | Unclassified      | Unclassified | Unclassified |
| S14_vf_109545 | n.a.                              | n.a.     | Clustered | VC_1421_0 | A   | n.a. | n.a.             | n.a.         | n.a.          | n.a.          | n.a.           | n.a.               | n.a.          | n.a.              | n.a.         | n.a.         |
| S14_vf_114491 | n.a.                              | n.a.     | Clustered | VC_1288_0 | A   | n.a. | n.a.             | n.a.         | n.a.          | n.a.          | n.a.           | n.a.               | n.a.          | n.a.              | n.a.         | n.a.         |
| S14_vf_117150 | Clostridium phage phiCp-B         | MW478290 | Clustered | VC_21_0   | N4  | 11   | Clostridium      | Group I      | Duplodnaviria | Heunggongvine | Urovincota     | Caudoviricetes     | n.a.          | Unclassified      | O            | O            |

|               |                                    |          |           |           |     |      |                  |          |               |                 |              |                    |              |              |              |               |      |
|---------------|------------------------------------|----------|-----------|-----------|-----|------|------------------|----------|---------------|-----------------|--------------|--------------------|--------------|--------------|--------------|---------------|------|
| S14_vf_117157 | n.a.                               | n.a.     | Clustered | VC_1564_0 | F   | n.a. | n.a.             | n.a.     | n.a.          | n.a.            | n.a.         | n.a.               | n.a.         | n.a.         | n.a.         | n.a.          | n.a. |
| S14_vf_117164 | n.a.                               | n.a.     | Clustered | VC_946_0  | A   | n.a. | n.a.             | n.a.     | n.a.          | n.a.            | n.a.         | n.a.               | n.a.         | n.a.         | n.a.         | n.a.          | n.a. |
| S14_vf_37500  | Microviridae sp.                   | MG945488 | Clustered | VC_1334_0 | C1  | 19   | Unspecified      | Group II | Monodnaviria  | Sangervirine    | Phixviricota | Malgrandaviricetes | Pettivirales | Microviridae | Unclassified | Unclassified  |      |
| S14_vf_44452  | n.a.                               | n.a.     | Clustered | VC_1511_0 | A   | n.a. | n.a.             | n.a.     | n.a.          | n.a.            | n.a.         | n.a.               | n.a.         | n.a.         | n.a.         | n.a.          | n.a. |
| S14_vf_48775  | n.a.                               | n.a.     | Clustered | VC_1597_0 | F2  | n.a. | n.a.             | n.a.     | n.a.          | n.a.            | n.a.         | n.a.               | n.a.         | n.a.         | n.a.         | n.a.          | n.a. |
| S14_vf_56130  | Clostridium phage phiMMP01         | LN681541 | Clustered | VC_151_0  | N22 | 20   | Clostridium      | Group I  | Duplodnaviria | Heunggongvirine | Uroviricota  | Caudoviricetes     | n.a.         | Unclassified | O            | O             |      |
| S14_vf_58919  | Faecalibacterium phage FP_Mushu    | MG711460 | Clustered | VC_1288_0 | C1  | 76   | Faecalibacterium | Group I  | Duplodnaviria | Heunggongvirine | Uroviricota  | Caudoviricetes     | n.a.         | Unclassified | Unclassified | Mushvirus     |      |
| S14_vf_72355  | Butyrivibrio virus Anian           | MN882551 | Clustered | VC_720_0  | N6  | 14   | Butyrivibrio     | Group I  | Duplodnaviria | Heunggongvirine | Uroviricota  | Caudoviricetes     | n.a.         | Unclassified | O            | O             |      |
| S14_vf_72953  | Lactobacillus phage phiEF-1.1      | MF041990 | Clustered | VC_315_0  | C1  | 23   | Lactobacillus    | Group I  | Duplodnaviria | Heunggongvirine | Uroviricota  | Caudoviricetes     | n.a.         | Unclassified | Unclassified | Unclassified  | O    |
| S14_vf_78139  | Lactobacillus phage JCL1032        | EU409559 | Clustered | VC_390_0  | C1  | 155  | Lactobacillus    | Group I  | Duplodnaviria | Heunggongvirine | Uroviricota  | Caudoviricetes     | n.a.         | Unclassified | Unclassified | Unclassified  |      |
| S14_vf_92240  | Butyrivibrio phage Idris           | MN882554 | Clustered | VC_1289_0 | N4  | 48   | Butyrivibrio     | Group I  | Duplodnaviria | Heunggongvirine | Uroviricota  | Caudoviricetes     | n.a.         | Unclassified | O            | O             |      |
| S14_vf_99344  | n.a.                               | n.a.     | Clustered | VC_1258_0 | A   | n.a. | n.a.             | n.a.     | n.a.          | n.a.            | n.a.         | n.a.               | n.a.         | n.a.         | n.a.         | n.a.          | n.a. |
| S14_vs_102698 | Bacillus phage 250                 | GU229986 | Clustered | VC_782_0  | N8  | 3    | Bacillus         | Group I  | Duplodnaviria | Heunggongvirine | Uroviricota  | Caudoviricetes     | n.a.         | Unclassified | O            | O             |      |
| S14_vs_110290 | n.a.                               | n.a.     | Clustered | VC_782_0  | A   | n.a. | n.a.             | n.a.     | n.a.          | n.a.            | n.a.         | n.a.               | n.a.         | n.a.         | n.a.         | n.a.          | n.a. |
| S14_vs_11510  | n.a.                               | n.a.     | Clustered | VC_1612_1 | A   | n.a. | n.a.             | n.a.     | n.a.          | n.a.            | n.a.         | n.a.               | n.a.         | n.a.         | n.a.         | n.a.          | n.a. |
| S14_vs_117158 | Streptococcus phage MismyG         | OL774867 | Clustered | VC_152_0  | N11 | 7    | Streptococcus    | Group I  | Duplodnaviria | Heunggongvirine | Uroviricota  | Caudoviricetes     | n.a.         | Unclassified | O            | O             |      |
| S14_vs_117160 | n.a.                               | n.a.     | Clustered | VC_658_0  | A   | n.a. | n.a.             | n.a.     | n.a.          | n.a.            | n.a.         | n.a.               | n.a.         | n.a.         | n.a.         | n.a.          | n.a. |
| S14_vs_117161 | Butyrivibrio phage Idris           | MN882554 | Clustered | VC_1289_0 | N8  | 34   | Butyrivibrio     | Group I  | Duplodnaviria | Heunggongvirine | Uroviricota  | Caudoviricetes     | n.a.         | Unclassified | O            | O             |      |
| S14_vs_117165 | Butyrivibrio virus Ceridwen        | MN882553 | Clustered | VC_779_0  | N39 | 2    | Butyrivibrio     | Group I  | Duplodnaviria | Heunggongvirine | Uroviricota  | Caudoviricetes     | n.a.         | Unclassified | O            | O             |      |
| S14_vs_117166 | n.a.                               | n.a.     | Clustered | VC_779_0  | A   | n.a. | n.a.             | n.a.     | n.a.          | n.a.            | n.a.         | n.a.               | n.a.         | n.a.         | n.a.         | n.a.          | n.a. |
| S14_vs_14757  | Faecalibacterium phage FP_Lugh     | MG711464 | Clustered | VC_923_0  | N4  | 12   | Faecalibacterium | Group I  | Duplodnaviria | Heunggongvirine | Uroviricota  | Caudoviricetes     | n.a.         | Unclassified | O            | O             |      |
| S14_vs_15228  | Cellulophaga phage phi17-2         | KC821609 | Clustered | VC_1055_1 | N8  | 6    | Cellulophaga     | Group I  | Duplodnaviria | Heunggongvirine | Uroviricota  | Caudoviricetes     | n.a.         | Unclassified | O            | O             |      |
| S14_vs_25852  | n.a.                               | n.a.     | Clustered | VC_1612_0 | A   | n.a. | n.a.             | n.a.     | n.a.          | n.a.            | n.a.         | n.a.               | n.a.         | n.a.         | n.a.         | n.a.          | n.a. |
| S14_vs_2870   | Acetobacter phage phiA01           | LC644971 | Clustered | VC_383_0  | N4  | 16   | Acetobacter      | Group I  | Duplodnaviria | Heunggongvirine | Uroviricota  | Caudoviricetes     | n.a.         | Unclassified | O            | O             |      |
| S14_vs_32499  | Bacteroides phage F2               | MT806187 | Clustered | VC_1505_0 | N11 | 5    | Bacteroides      | Group I  | Duplodnaviria | Heunggongvirine | Uroviricota  | Caudoviricetes     | n.a.         | Unclassified | O            | O             |      |
| S14_vs_3251   | n.a.                               | n.a.     | Clustered | VC_1294_0 | A   | n.a. | n.a.             | n.a.     | n.a.          | n.a.            | n.a.         | n.a.               | n.a.         | n.a.         | n.a.         | n.a.          | n.a. |
| S14_vs_39797  | Clostridium phage phiCD111         | LN681535 | Clustered | VC_923_0  | N5  | 11   | Clostridium      | Group I  | Duplodnaviria | Heunggongvirine | Uroviricota  | Caudoviricetes     | n.a.         | Unclassified | O            | O             |      |
| S14_vs_59347  | Butyrivibrio virus Anian           | MN882551 | Clustered | VC_720_0  | N5  | 17   | Butyrivibrio     | Group I  | Duplodnaviria | Heunggongvirine | Uroviricota  | Caudoviricetes     | n.a.         | Unclassified | O            | O             |      |
| S14_vs_61530  | n.a.                               | n.a.     | Clustered | VC_779_0  | A   | n.a. | n.a.             | n.a.     | n.a.          | n.a.            | n.a.         | n.a.               | n.a.         | n.a.         | n.a.         | n.a.          | n.a. |
| S14_vs_62178  | Geobacillus phage GBSV1            | DQ340064 | Clustered | VC_778_0  | N43 | 6    | Geobacillus      | Group I  | Duplodnaviria | Heunggongvirine | Uroviricota  | Caudoviricetes     | n.a.         | Unclassified | O            | O             |      |
| S14_vs_632    | Clostridium phage phiMMP01         | LN681541 | Clustered | VC_151_0  | N18 | 24   | Clostridium      | Group I  | Duplodnaviria | Heunggongvirine | Uroviricota  | Caudoviricetes     | n.a.         | Unclassified | O            | O             |      |
| S14_vs_66139  | Streptococcus phage Javan630       | MK448997 | Clustered | VC_649_0  | N6  | 52   | Streptococcus    | Group I  | Duplodnaviria | Heunggongvirine | Uroviricota  | Caudoviricetes     | n.a.         | Unclassified | O            | O             |      |
| S14_vs_66208  | Phage vB_RanS_PJN03                | QNZ85412 | Clustered | VC_950_0  | N13 | 7    | Unspecified      | Group I  | Duplodnaviria | Heunggongvirine | Uroviricota  | Caudoviricetes     | n.a.         | Unclassified | O            | O             |      |
| S14_vs_66841  | Erysipelothrix phage SE-1          | KR816341 | Clustered | VC_1149_0 | N3  | 15   | Erysipelothrix   | Group I  | Duplodnaviria | Heunggongvirine | Uroviricota  | Caudoviricetes     | n.a.         | Unclassified | O            | O             |      |
| S14_vs_67094  | n.a.                               | n.a.     | Clustered | VC_1614_0 | F   | n.a. | n.a.             | n.a.     | n.a.          | n.a.            | n.a.         | n.a.               | n.a.         | n.a.         | n.a.         | n.a.          | n.a. |
| S14_vs_73301  | Clostridium phage phiCTP1          | HM159959 | Clustered | VC_920_0  | N5  | 7    | Clostridium      | Group I  | Duplodnaviria | Heunggongvirine | Uroviricota  | Caudoviricetes     | n.a.         | Unclassified | O            | O             |      |
| S14_vs_78164  | Wingnadskevella phage Petermella_1 | MT732475 | Clustered | VC_694_0  | N5  | 17   | Wingnadskevella  | Group I  | Duplodnaviria | Heunggongvirine | Uroviricota  | Caudoviricetes     | n.a.         | Unclassified | O            | O             |      |
| S14_vs_88666  | Clostridium phage phiCp-A          | MW478289 | Clustered | VC_1035_0 | N2  | 14   | Clostridium      | Group I  | Duplodnaviria | Heunggongvirine | Uroviricota  | Caudoviricetes     | n.a.         | Unclassified | O            | O             |      |
| S14_vs_96111  | Streptococcus phage Javan105       | MG448667 | Clustered | VC_649_1  | C1  | 58   | Streptococcus    | Group I  | Duplodnaviria | Heunggongvirine | Uroviricota  | Caudoviricetes     | n.a.         | Unclassified | Unclassified | Unclassified  |      |
| S14_vs_9676   | Faecalibacterium phage FP_Lagaffe  | MG711461 | Clustered | VC_1291_0 | N43 | 3    | Faecalibacterium | Group I  | Duplodnaviria | Heunggongvirine | Uroviricota  | Caudoviricetes     | n.a.         | Unclassified | O            | O             |      |
| S15_vf_2032   | Bacteroides phage LoVEphage        | MW660583 | Clustered | VC_1527_0 | N3  | 36   | Bacteroides      | Group I  | Duplodnaviria | Heunggongvirine | Uroviricota  | Caudoviricetes     | n.a.         | Unclassified | O            | O             |      |
| S15_vf_20644  | Phage DP_SC_6_H4_2017              | MT121964 | Clustered | VC_1490_1 | C3  | 268  | Unspecified      | Group I  | Duplodnaviria | Heunggongvirine | Uroviricota  | Caudoviricetes     | n.a.         | Unclassified | Unclassified | Unclassified  |      |
| S15_vf_2513   | n.a.                               | n.a.     | Clustered | VC_1252_2 | A   | n.a. | n.a.             | n.a.     | n.a.          | n.a.            | n.a.         | n.a.               | n.a.         | n.a.         | n.a.         | n.a.          | n.a. |
| S15_vf_56539  | n.a.                               | n.a.     | Clustered | VC_946_0  | A   | n.a. | n.a.             | n.a.     | n.a.          | n.a.            | n.a.         | n.a.               | n.a.         | n.a.         | n.a.         | n.a.          | n.a. |
| S15_vf_74586  | Phage DP_SC_6_H4_2017              | MT121964 | Clustered | VC_1490_0 | N8  | 118  | Unspecified      | Group I  | Duplodnaviria | Heunggongvirine | Uroviricota  | Caudoviricetes     | n.a.         | Unclassified | O            | O             |      |
| S15_vs_1407   | n.a.                               | n.a.     | Clustered | VC_946_0  | A   | n.a. | n.a.             | n.a.     | n.a.          | n.a.            | n.a.         | n.a.               | n.a.         | n.a.         | n.a.         | n.a.          | n.a. |
| S15_vs_18274  | n.a.                               | n.a.     | Clustered | VC_1602_0 | A   | n.a. | n.a.             | n.a.     | n.a.          | n.a.            | n.a.         | n.a.               | n.a.         | n.a.         | n.a.         | n.a.          | n.a. |
| S15_vs_27510  | n.a.                               | n.a.     | Clustered | VC_1559_1 | A   | n.a. | n.a.             | n.a.     | n.a.          | n.a.            | n.a.         | n.a.               | n.a.         | n.a.         | n.a.         | n.a.          | n.a. |
| S15_vs_35445  | n.a.                               | n.a.     | Clustered | VC_1599_0 | A   | n.a. | n.a.             | n.a.     | n.a.          | n.a.            | n.a.         | n.a.               | n.a.         | n.a.         | n.a.         | n.a.          | n.a. |
| S15_vs_7103   | Eggerthella phage PMBT5            | MH626557 | Clustered | VC_1421_0 | N35 | 3    | Eggerthella      | Group I  | Duplodnaviria | Heunggongvirine | Uroviricota  | Caudoviricetes     | n.a.         | Unclassified | O            | O             |      |
| S15_vs_71968  | Pasteurella phage AFS-2018a        | MH238466 | Clustered | VC_630_0  | N4  | 6    | Pasteurella      | Group I  | Duplodnaviria | Heunggongvirine | Uroviricota  | Caudoviricetes     | n.a.         | Unclassified | O            | O             |      |
| S15_vs_76390  | Bdellovibrio phage phi1402         | JF347099 | Clustered | VC_967_0  | C4  | 30   | Bdellovibrio     | Group I  | Duplodnaviria | Heunggongvirine | Uroviricota  | Caudoviricetes     | n.a.         | Unclassified | Unclassified | Unclassified  |      |
| S16_vf_100235 | n.a.                               | n.a.     | Clustered | VC_1258_0 | A   | n.a. | n.a.             | n.a.     | n.a.          | n.a.            | n.a.         | n.a.               | n.a.         | n.a.         | n.a.         | n.a.          | n.a. |
| S16_vf_100378 | Bifidobacterium phage BitterVaud1  | MT006236 | Clustered | VC_826_0  | C3  | 22   | Bifidobacterium  | Group I  | Duplodnaviria | Heunggongvirine | Uroviricota  | Caudoviricetes     | n.a.         | Unclassified | Unclassified | Unclassified  |      |
| S16_vf_1037   | n.a.                               | n.a.     | Clustered | VC_1254_1 | A   | n.a. | n.a.             | n.a.     | n.a.          | n.a.            | n.a.         | n.a.               | n.a.         | n.a.         | n.a.         | n.a.          | n.a. |
| S16_vf_119834 | Clostridium phage HM2              | LT600745 | Clustered | VC_1261_0 | N34 | 4    | Clostridium      | Group I  | Duplodnaviria | Heunggongvirine | Uroviricota  | Caudoviricetes     | n.a.         | Unclassified | O            | O             |      |
| S16_vf_151450 | uncultured phage cri27_1           | MT774393 | Clustered | VC_093_0  | C2  | 64   | Unspecified      | Group I  | Duplodnaviria | Heunggongvirine | Uroviricota  | Caudoviricetes     | n.a.         | Unclassified | O            | O             |      |
| S16_vf_164913 | n.a.                               | n.a.     | Clustered | VC_1607_0 | F   | n.a. | n.a.             | n.a.     | n.a.          | n.a.            | n.a.         | n.a.               | n.a.         | n.a.         | n.a.         | n.a.          | n.a. |
| S16_vf_169895 | Clostridium phage HM2              | LT600745 | Clustered | VC_1261_0 | N41 | 3    | Clostridium      | Group I  | Duplodnaviria | Heunggongvirine | Uroviricota  | Caudoviricetes     | n.a.         | Unclassified | O            | O             |      |
| S16_vf_169985 | Phage DP_SC_6_H4_2017              | MT121964 | Clustered | VC_1490_0 | N8  | 118  | Unspecified      | Group I  | Duplodnaviria | Heunggongvirine | Uroviricota  | Caudoviricetes     | n.a.         | Unclassified | O            | O             |      |
| S16_vf_173109 | Bifidobacterium phage BlindBasel1  | MT006235 | Clustered | VC_1485_0 | C1  | 48   | Bifidobacterium  | Group I  | Duplodnaviria | Heunggongvirine | Uroviricota  | Caudoviricetes     | n.a.         | Unclassified | Unclassified | Unclassified  |      |
| S16_vf_36146  | Clostridium phage phiMMP01         | LN681541 | Clustered | VC_151_0  | N18 | 18   | Clostridium      | Group I  | Duplodnaviria | Heunggongvirine | Uroviricota  | Caudoviricetes     | n.a.         | Unclassified | O            | O             |      |
| S16_vf_5270   | Faecalibacterium phage FP_oengus   | MG711463 | Clustered | VC_085_1  | N19 | 46   | Faecalibacterium | Group I  | Duplodnaviria | Heunggongvirine | Uroviricota  | Caudoviricetes     | n.a.         | Unclassified | O            | O             |      |
| S16_vf_6102   | Faecalibacterium phage FP_Toutatis | MG711466 | Clustered | VC_728_0  | C4  | 65   | Faecalibacterium | Group I  | Duplodnaviria | Heunggongvirine | Uroviricota  | Caudoviricetes     | n.a.         | Unclassified | Unclassified | Toutatisvirus |      |
| S16_vf_87190  | Cellulophaga phage phi13:1         | KC821625 | Clustered | VC_963_0  | N5  | 17   | Cellulophaga     | Group I  | Duplodnaviria | Heunggongvirine | Uroviricota  | Caudoviricetes     | n.a.         | Unclassified | O            | O             |      |
| S16_vf_90328  | Butyrivibrio phage Idris           | MN882554 | Clustered | VC_1477_0 | N16 | 1    | Butyrivibrio     | Group I  | Duplodnaviria | Heunggongvirine | Uroviricota  | Caudoviricetes     | n.a.         | Unclassified | O            | O             |      |
| S16_vf_97279  | Faecalibacterium phage FP_Epona    | MG711462 | Clustered | VC_723_0  | C1  | 113  | Faecalibacterium | Group I  | Duplodnaviria | Heunggongvirine | Uroviricota  | Caudoviricetes     | n.a.         | Unclassified | Unclassified | Eponavirus    |      |
| S16_vs_103726 | n.a.                               | n.a.     | Clustered | VC_779_0  | A   | n.a. | n.a.             | n.a.     | n.a.          | n.a.            | n.a.         | n.a.               | n.a.         | n.a.         | n.a.         | n.a.          | n.a. |
| S16_vs_116956 | n.a.                               | n.a.     | Clustered | VC_442_0  | A   | n.a. | n.a.             | n.a.     | n.a.          | n.a.            | n.a.         | n.a.               | n.a.         | n.a.         | n.a.         | n.a.          | n.a. |
| S16_vs_120622 | Acetobacter phage phiA01           | LC644971 | Clustered | VC_383_0  | N4  | 14   | Acetobacter      | Group I  | Duplodnaviria | Heunggongvirine | Uroviricota  | Caudoviricetes     | n.a.         | Unclassified | O            | O             |      |
| S16_vs_124703 | Bacillus phage vB_BIS_BMBtp13      | KX190832 | Clustered | VC_667_0  | C9  | 8    | Bacillus         | Group I  | Duplodnaviria | Heunggongvirine | Uroviricota  | Caudoviricetes     | n.a.         | Unclassified | Unclassified | Unclassified  |      |
| S16_vs_127669 | Bacteroides phage LoVEphage        | MW660583 | Clustered | VC_1526_0 | C1  | 297  | Bacteroides      | Group I  | Duplodnaviria | Heunggongvirine | Uroviricota  | Caudoviricetes     | n.a.         | Unclassified | Unclassified | Unclassified  |      |
| S16_vs_127905 | n.a.                               | n.a.     | Clustered | VC_1559_1 | A   | n.a. | n.a.             | n.a.     | n.a.          | n.a.            | n.a.         | n.a.               | n.a.         | n.a.         | n.a.         | n.a.          | n.a. |
| S16_vs_136935 | n.a.                               | n.a.     | Clustered | VC_1063_0 | A   | n.a. | n.a.             | n.a.     | n.a.          | n.a.            | n.a.         | n.a.               | n.a.         | n.a.         | n.a.         | n.a.          | n.a. |
| S16_vs_142561 | Pasteurella phage AFS-2018a        | MH238466 | Clustered | VC_630_0  | N5  | 4    | Pasteurella      | Group I  | Duplodnaviria | Heunggongvirine | Uroviricota  | Caudoviricetes     | n.a.         | Unclassified | O            | O             |      |
| S16_vs_173079 | Faecalibacterium phage FP_Brigit   | MG711465 | Clustered | VC_442_0  | N4  | 34   | Faecalibacterium | Group I  | Duplodnaviria | Heunggongvirine | Uroviricota  | Caudoviricetes     | n.a.         | Unclassified | O            | O             |      |
| S16_vs_173096 | Akkermansia phage DTMO-2021a       | CP084202 | Clustered | VC_751_0  | C1  | 90   | Akkermansia      | Group I  | Duplodnaviria | Heunggongvirine | Uroviricota  | Caudoviricetes     | n.a.         | Unclassified | Unclassified | Unclassified  |      |
| S16_vs_173102 | Pantbacteroides phage PDS1         | MN929097 | Clustered | VC_855_0  | C4  | 114  | Pantbacteroides  | Group I  | Duplodnaviria | Heunggongvirine | Uroviricota  | Caudoviricetes     | n.a.         | Unclassified | Unclassified | Unclassified  |      |
| S16_vs_18440  | Faecalibacterium phage FP_Toutatis | MG711466 | Clustered | VC_728_0  | C1  | 121  | Faecalibacterium | Group I  | Duplodnaviria | Heunggongvirine | Uroviricota  | Caudoviricetes     | n.a.         | Unclassified | Unclassified | Toutatisvirus |      |
| S16_vs_19320  | Bacillus phage vB_BIS_BMBtp13      | KX190832 | Clustered | VC_1290_0 | N9  | 5    | Bacillus         | Group I  | Duplodnaviria | Heunggongvirine | Uroviricota  | Caudoviricetes     | n.a.         | Unclassified | O            | O             |      |
| S16_vs_19968  | n.a.                               | n.a.     | Clustered | VC_1591_0 | A   | n.a. | n.a.             | n.a.     | n.a.          | n.a.            | n.a.         | n.a.               | n.a.         | n.a.         | n.a.         | n.a.          | n.a. |
| S16_vs_26078  | Bacillus phage 1                   | DQ8403   |           |           |     |      |                  |          |               |                 |              |                    |              |              |              |               |      |

|               |                                   |          |           |           |     |      |                  |          |               |               |               |                    |               |                |                |              |      |
|---------------|-----------------------------------|----------|-----------|-----------|-----|------|------------------|----------|---------------|---------------|---------------|--------------------|---------------|----------------|----------------|--------------|------|
| S16_vs_32764  | n.a.                              | n.a.     | Clustered | VC_1599_0 | A   | n.a. | n.a.             | n.a.     | n.a.          | n.a.          | n.a.          | n.a.               | n.a.          | n.a.           | n.a.           | n.a.         | n.a. |
| S16_vs_33281  | n.a.                              | n.a.     | Clustered | VC_1591_0 | A   | n.a. | n.a.             | n.a.     | n.a.          | n.a.          | n.a.          | n.a.               | n.a.          | n.a.           | n.a.           | n.a.         | n.a. |
| S16_vs_4662   | Bacillus phage vB_BIS_BMBtp13     | KX190832 | Clustered | VC_667_0  | C7  | 5    | Bacillus         | Group I  | Duplodnaviria | Heunggongvine | Urovincota    | Caudoviricetes     | n.a.          | Unclassified   | Unclassified   | Unclassified |      |
| S16_vs_48714  | n.a.                              | n.a.     | Clustered | VC_1616_0 | F   | n.a. | n.a.             | n.a.     | n.a.          | n.a.          | n.a.          | n.a.               | n.a.          | n.a.           | n.a.           | n.a.         | n.a. |
| S16_vs_51901  | n.a.                              | n.a.     | Clustered | VC_1602_0 | A   | n.a. | n.a.             | n.a.     | n.a.          | n.a.          | n.a.          | n.a.               | n.a.          | n.a.           | n.a.           | n.a.         | n.a. |
| S16_vs_64584  | n.a.                              | n.a.     | Clustered | VC_1611_0 | A   | n.a. | n.a.             | n.a.     | n.a.          | n.a.          | n.a.          | n.a.               | n.a.          | n.a.           | n.a.           | n.a.         | n.a. |
| S16_vs_75108  | n.a.                              | n.a.     | Clustered | VC_1290_0 | A   | n.a. | n.a.             | n.a.     | n.a.          | n.a.          | n.a.          | n.a.               | n.a.          | n.a.           | n.a.           | n.a.         | n.a. |
| S16_vs_78361  | Bifidobacterium phage PMBT6       | MH444512 | Clustered | VC_578_0  | N2  | 52   | Bifidobacterium  | Group I  | Duplodnaviria | Heunggongvine | Urovincota    | Caudoviricetes     | n.a.          | Unclassified   | O              | O            |      |
| S16_vs_80244  | n.a.                              | n.a.     | Clustered | VC_1579_0 | A   | n.a. | n.a.             | n.a.     | n.a.          | n.a.          | n.a.          | n.a.               | n.a.          | n.a.           | n.a.           | n.a.         | n.a. |
| S16_vs_86116  | Faecalibacterium phage FP_Lagaffe | MG711461 | Clustered | VC_727_0  | C1  | 169  | Faecalibacterium | Group I  | Duplodnaviria | Heunggongvine | Urovincota    | Caudoviricetes     | n.a.          | Unclassified   | Unclassified   | Lagaffevirus |      |
| S16_vs_89511  | Clostridioides phage CD1801       | MW512570 | Clustered | VC_670_0  | N12 | 5    | Clostridioides   | Group I  | Duplodnaviria | Heunggongvine | Urovincota    | Caudoviricetes     | n.a.          | Unclassified   | O              | O            |      |
| S16_vs_92150  | Faecalibacterium phage FP_Lugh    | MG711464 | Clustered | VC_779_0  | N27 | 7    | Faecalibacterium | Group I  | Duplodnaviria | Heunggongvine | Urovincota    | Caudoviricetes     | n.a.          | Unclassified   | O              | O            |      |
| S17_vf_148303 | n.a.                              | n.a.     | Clustered | VC_1258_0 | A   | n.a. | n.a.             | n.a.     | n.a.          | n.a.          | n.a.          | n.a.               | n.a.          | n.a.           | n.a.           | n.a.         | n.a. |
| S17_vf_172132 | n.a.                              | n.a.     | Clustered | VC_1617_0 | F   | n.a. | n.a.             | n.a.     | n.a.          | n.a.          | n.a.          | n.a.               | n.a.          | n.a.           | n.a.           | n.a.         | n.a. |
| S17_vf_174033 | Bacillus phage SPR                | OM236515 | Clustered | VC_1040_0 | N10 | 3    | Bacillus         | Group I  | Duplodnaviria | Heunggongvine | Urovincota    | Caudoviricetes     | n.a.          | Unclassified   | O              | O            |      |
| S17_vf_174203 | Clostridium phage HM2             | LT600745 | Clustered | VC_1258_0 | N48 | 4    | Clostridium      | Group I  | Duplodnaviria | Heunggongvine | Urovincota    | Caudoviricetes     | n.a.          | Unclassified   | O              | O            |      |
| S17_vf_177197 | n.a.                              | n.a.     | Clustered | VC_1617_0 | F   | n.a. | n.a.             | n.a.     | n.a.          | n.a.          | n.a.          | n.a.               | n.a.          | n.a.           | n.a.           | n.a.         | n.a. |
| S17_vf_177199 | Enterobacter phage phiEap-2       | KT287080 | Clustered | VC_560_0  | C1  | 93   | Enterobacter     | Group I  | Duplodnaviria | Heunggongvine | Urovincota    | Caudoviricetes     | n.a.          | Unclassified   | Guemseyvirinae | Comellvirus  |      |
| S17_vf_35138  | Phage vB_RanS_PJN03               | ON245412 | Clustered | VC_949_0  | N12 | 2    | Unspecified      | Group I  | Duplodnaviria | Heunggongvine | Urovincota    | Caudoviricetes     | n.a.          | Unclassified   | O              | O            |      |
| S17_vf_67042  | Clostridium phage HM2             | LT600745 | Clustered | VC_1261_0 | N27 | 8    | Clostridium      | Group I  | Duplodnaviria | Heunggongvine | Urovincota    | Caudoviricetes     | n.a.          | Unclassified   | Salasmavirinae | O            |      |
| S17_vf_77057  | n.a.                              | n.a.     | Clustered | VC_1585_0 | A   | n.a. | n.a.             | n.a.     | n.a.          | n.a.          | n.a.          | n.a.               | n.a.          | n.a.           | n.a.           | n.a.         | n.a. |
| S17_vf_79151  | n.a.                              | n.a.     | Clustered | VC_1258_0 | A   | n.a. | n.a.             | n.a.     | n.a.          | n.a.          | n.a.          | n.a.               | n.a.          | n.a.           | n.a.           | n.a.         | n.a. |
| S17_vf_81232  | uncultured phage cr10_1           | MT774382 | Clustered | VC_519_1  | C1  | 292  | Unspecified      | Group I  | Duplodnaviria | Heunggongvine | Urovincota    | Caudoviricetes     | Crassvirales  | Suolivirinae   | Boovirinae     | Canhavirinae |      |
| S17_vf_97671  | Faecalibacterium phage FP_Mushu   | MG711460 | Clustered | VC_1288_0 | C3  | 78   | Faecalibacterium | Group I  | Duplodnaviria | Heunggongvine | Urovincota    | Caudoviricetes     | n.a.          | Unclassified   | Unclassified   | Mushavirus   |      |
| S17_vs_103009 | n.a.                              | n.a.     | Clustered | VC_1291_0 | A   | n.a. | n.a.             | n.a.     | n.a.          | n.a.          | n.a.          | n.a.               | n.a.          | n.a.           | n.a.           | n.a.         | n.a. |
| S17_vs_116640 | Bacteroides phage F4              | MT806185 | Clustered | VC_1505_0 | N12 | 2    | Bacteroides      | Group I  | Duplodnaviria | Heunggongvine | Urovincota    | Caudoviricetes     | n.a.          | Unclassified   | O              | O            |      |
| S17_vs_121041 | Geobacillus phage GBSV1           | DQ340064 | Clustered | VC_778_0  | N52 | 6    | Geobacillus      | Group I  | Duplodnaviria | Heunggongvine | Urovincota    | Caudoviricetes     | n.a.          | Unclassified   | O              | O            |      |
| S17_vs_127519 | n.a.                              | n.a.     | Clustered | VC_1290_0 | A   | n.a. | n.a.             | n.a.     | n.a.          | n.a.          | n.a.          | n.a.               | n.a.          | n.a.           | n.a.           | n.a.         | n.a. |
| S17_vs_138036 | Bdellovibrio phage phi1402        | JF344709 | Clustered | VC_967_0  | C4  | 31   | Bdellovibrio     | Group I  | Duplodnaviria | Heunggongvine | Urovincota    | Caudoviricetes     | n.a.          | Unclassified   | Unclassified   | Unclassified |      |
| S17_vs_160502 | uncultured phage cr116_1          | MT774389 | Clustered | VC_948_0  | N13 | 4    | Unspecified      | Group I  | Duplodnaviria | Heunggongvine | Urovincota    | Caudoviricetes     | Crassvirales  | Steigvirinae   | O              | O            |      |
| S17_vs_177196 | n.a.                              | n.a.     | Clustered | VC_1602_0 | A   | n.a. | n.a.             | n.a.     | n.a.          | n.a.          | n.a.          | n.a.               | n.a.          | n.a.           | n.a.           | n.a.         | n.a. |
| S17_vs_2079   | Bacteroides phage p00             | BK010646 | Clustered | VC_695_0  | C1  | 38   | Bacteroides      | Group I  | Duplodnaviria | Heunggongvine | Urovincota    | Caudoviricetes     | n.a.          | Unclassified   | Unclassified   | Unclassified |      |
| S17_vs_29515  | uncultured phage c271_1           | MT774394 | Clustered | VC_945_0  | N12 | 2    | Unspecified      | Group I  | Duplodnaviria | Heunggongvine | Urovincota    | Caudoviricetes     | Crassvirales  | Intestivirinae | O              | O            |      |
| S17_vs_41845  | Ruminococcus phage phiRM10        | MY780841 | Clustered | VC_779_0  | N55 | 3    | Ruminococcus     | Group I  | Duplodnaviria | Heunggongvine | Urovincota    | Caudoviricetes     | n.a.          | Unclassified   | O              | O            |      |
| S17_vs_43307  | n.a.                              | n.a.     | Clustered | VC_1583_0 | A   | n.a. | n.a.             | n.a.     | n.a.          | n.a.          | n.a.          | n.a.               | n.a.          | n.a.           | n.a.           | n.a.         | n.a. |
| S17_vs_58025  | n.a.                              | n.a.     | Clustered | VC_1607_0 | F   | n.a. | n.a.             | n.a.     | n.a.          | n.a.          | n.a.          | n.a.               | n.a.          | n.a.           | n.a.           | n.a.         | n.a. |
| S17_vs_73830  | n.a.                              | n.a.     | Clustered | VC_779_0  | A   | n.a. | n.a.             | n.a.     | n.a.          | n.a.          | n.a.          | n.a.               | n.a.          | n.a.           | n.a.           | n.a.         | n.a. |
| S1_vf_125650  | n.a.                              | n.a.     | Clustered | VC_1607_0 | F   | n.a. | n.a.             | n.a.     | n.a.          | n.a.          | n.a.          | n.a.               | n.a.          | n.a.           | n.a.           | n.a.         | n.a. |
| S1_vf_158961  | Faecalibacterium phage FP_Lagaffe | MG711461 | Clustered | VC_1256_0 | N4  | 8    | Faecalibacterium | Group I  | Duplodnaviria | Heunggongvine | Urovincota    | Caudoviricetes     | n.a.          | Unclassified   | O              | O            |      |
| S1_vf_159951  | Bacteroides phage SJC03           | MT074146 | Clustered | VC_1489_0 | N6  | 15   | Bacteroides      | Group I  | Duplodnaviria | Heunggongvine | Urovincota    | Caudoviricetes     | n.a.          | Unclassified   | O              | O            |      |
| S1_vf_22149   | n.a.                              | n.a.     | Clustered | VC_1552_0 | A   | n.a. | n.a.             | n.a.     | n.a.          | n.a.          | n.a.          | n.a.               | n.a.          | n.a.           | n.a.           | n.a.         | n.a. |
| S1_vf_50591   | Streptococcus phage Javan261      | MK448720 | Clustered | VC_905_0  | N4  | 10   | Streptococcus    | Group I  | Duplodnaviria | Heunggongvine | Urovincota    | Caudoviricetes     | n.a.          | Unclassified   | O              | O            |      |
| S1_vs_100019  | Torsteo microvirus 19             | MK765569 | Clustered | VC_1300_0 | N4  | 4    | Unspecified      | Group II | Duplodnaviria | Sangervine    | Phixviricota  | Malgrandaviricetes | Petitivirales | Microvirinae   | O              | O            |      |
| S1_vs_143929  | n.a.                              | n.a.     | Clustered | VC_1554_0 | A   | n.a. | n.a.             | n.a.     | n.a.          | n.a.          | n.a.          | n.a.               | n.a.          | n.a.           | n.a.           | n.a.         | n.a. |
| S1_vs_3435    | Microviridae sp.                  | MG945598 | Clustered | VC_1385_0 | C1  | 4    | Unspecified      | Group II | Duplodnaviria | Sangervine    | Phixviricota  | Malgrandaviricetes | Petitivirales | Microviridae   | Unclassified   | Unclassified |      |
| S1_vs_62409   | Geobacillus phage GBSV1           | DQ340064 | Clustered | VC_778_0  | N20 | 9    | Geobacillus      | Group I  | Duplodnaviria | Heunggongvine | Urovincota    | Caudoviricetes     | n.a.          | Unclassified   | O              | O            |      |
| S1_vs_91270   | n.a.                              | n.a.     | Clustered | VC_782_0  | A   | n.a. | n.a.             | n.a.     | n.a.          | n.a.          | n.a.          | n.a.               | n.a.          | n.a.           | n.a.           | n.a.         | n.a. |
| S2_vf_20910   | n.a.                              | n.a.     | Clustered | VC_1585_0 | A   | n.a. | n.a.             | n.a.     | n.a.          | n.a.          | n.a.          | n.a.               | n.a.          | n.a.           | n.a.           | n.a.         | n.a. |
| S2_vf_21511   | Faecalibacterium phage FP_cengus  | MG711463 | Clustered | VC_1083_1 | N21 | 70   | Faecalibacterium | Group I  | Duplodnaviria | Heunggongvine | Urovincota    | Caudoviricetes     | n.a.          | Unclassified   | O              | O            |      |
| S2_vf_21630   | Clostridium phage phiCTP1         | HM159959 | Clustered | VC_921_0  | N5  | 6    | Clostridium      | Group I  | Duplodnaviria | Heunggongvine | Urovincota    | Caudoviricetes     | n.a.          | Unclassified   | O              | O            |      |
| S2_vf_3356    | n.a.                              | n.a.     | Clustered | VC_1607_0 | F   | n.a. | n.a.             | n.a.     | n.a.          | n.a.          | n.a.          | n.a.               | n.a.          | n.a.           | n.a.           | n.a.         | n.a. |
| S2_vf_4910    | Clostridium phage HM2             | LT600745 | Clustered | VC_1261_0 | N27 | 7    | Clostridium      | Group I  | Duplodnaviria | Heunggongvine | Urovincota    | Caudoviricetes     | n.a.          | Salasmavirinae | O              | O            |      |
| S2_vs_10289   | Bacteroides phage p00             | BK010646 | Clustered | VC_695_0  | C1  | 47   | Bacteroides      | Group I  | Duplodnaviria | Heunggongvine | Urovincota    | Caudoviricetes     | n.a.          | Unclassified   | Unclassified   | Unclassified |      |
| S2_vs_7306    | Panibacteroides phage PDS1        | MN929097 | Clustered | VC_855_0  | C2  | 160  | Panibacteroides  | Group I  | Duplodnaviria | Heunggongvine | Urovincota    | Caudoviricetes     | n.a.          | Unclassified   | Unclassified   | Unclassified |      |
| S3_vf_100440  | Clostridium phage phiMMP01        | LN681541 | Clustered | VC_151_0  | N20 | 17   | Clostridium      | Group I  | Duplodnaviria | Heunggongvine | Urovincota    | Caudoviricetes     | n.a.          | Unclassified   | O              | O            |      |
| S3_vf_106401  | Clostridium phage phiCD6356       | GU949551 | Clustered | VC_430_0  | N3  | 17   | Clostridium      | Group I  | Duplodnaviria | Heunggongvine | Urovincota    | Caudoviricetes     | n.a.          | Unclassified   | O              | O            |      |
| S3_vf_109277  | n.a.                              | n.a.     | Clustered | VC_1558_0 | F   | n.a. | n.a.             | n.a.     | n.a.          | n.a.          | n.a.          | n.a.               | n.a.          | n.a.           | n.a.           | n.a.         | n.a. |
| S3_vf_111776  | Clostridium phage HM2             | LT600745 | Clustered | VC_1261_0 | N36 | 4    | Clostridium      | Group I  | Duplodnaviria | Heunggongvine | Urovincota    | Caudoviricetes     | n.a.          | Salasmavirinae | O              | O            |      |
| S3_vf_115304  | uncultured phage cr125_1          | MT774407 | Clustered | VC_519_2  | C1  | 239  | Unspecified      | Group I  | Duplodnaviria | Heunggongvine | Urovincota    | Caudoviricetes     | Crassvirales  | Suolivirinae   | Uncovirinae    | Aurdevirus   |      |
| S3_vf_127168  | n.a.                              | n.a.     | Clustered | VC_1607_0 | F   | n.a. | n.a.             | n.a.     | n.a.          | n.a.          | n.a.          | n.a.               | n.a.          | n.a.           | n.a.           | n.a.         | n.a. |
| S3_vf_127399  | Bacteroides phage SJC03           | MT074146 | Clustered | VC_1489_0 | N6  | 13   | Bacteroides      | Group I  | Duplodnaviria | Heunggongvine | Urovincota    | Caudoviricetes     | n.a.          | Unclassified   | O              | O            |      |
| S3_vf_127405  | Clostridium phage phiSM101        | CP000315 | Clustered | VC_21_0   | N4  | 11   | Clostridium      | Group I  | Duplodnaviria | Heunggongvine | Urovincota    | Caudoviricetes     | n.a.          | Unclassified   | O              | O            |      |
| S3_vf_127406  | Phage DP_SC_6_H4_2017             | MT121964 | Clustered | VC_1490_1 | C3  | 269  | Unspecified      | Group I  | Duplodnaviria | Heunggongvine | Urovincota    | Caudoviricetes     | n.a.          | Unclassified   | Unclassified   | Unclassified |      |
| S3_vf_127409  | Clostridium phage phiMMP01        | LN681541 | Clustered | VC_151_0  | N19 | 21   | Clostridium      | Group I  | Duplodnaviria | Heunggongvine | Urovincota    | Caudoviricetes     | n.a.          | Unclassified   | O              | O            |      |
| S3_vf_127423  | n.a.                              | n.a.     | Clustered | VC_1618_0 | F   | n.a. | n.a.             | n.a.     | n.a.          | n.a.          | n.a.          | n.a.               | n.a.          | n.a.           | n.a.           | n.a.         | n.a. |
| S3_vf_127426  | Gokushovirus WZ-2015a             | KT264756 | Clustered | VC_1145_0 | C1  | 14   | Unspecified      | Group II | Monodnaviria  | Sangervine    | Phixviricota  | Malgrandaviricetes | Petitivirales | Microviridae   | Gokushovirinae | Gokushovirus |      |
| S3_vf_127431  | Inovirus sp.                      | MT135308 | Clustered | VC_1492_0 | C1  | 36   | Unspecified      | Group II | Monodnaviria  | Loebvirinae   | Hefneviricota | Faserviricetes     | Inoviridae    | Microviridae   | Inovirus       | Inovirus     |      |
| S3_vf_127447  | uncultured phage cr126_1          | MT774391 | Clustered | VC_1054_1 | C1  | 233  | Unspecified      | Group I  | Duplodnaviria | Heunggongvine | Urovincota    | Caudoviricetes     | Crassvirales  | Steigvirinae   | Asimvirinae    | Kolpovirus   |      |
| S3_vf_17748   | Carjivus communis                 | BR010471 | Clustered | VC_691_0  | C1  | 284  | Unspecified      | Group I  | Duplodnaviria | Heunggongvine | Urovincota    | Caudoviricetes     | n.a.          | Unclassified   | Cradevirinae   | Carjivus     |      |
| S3_vf_18080   | n.a.                              | n.a.     | Clustered | VC_1576_0 | A   | n.a. | n.a.             | n.a.     | n.a.          | n.a.          | n.a.          | n.a.               | n.a.          | n.a.           | n.a.           | n.a.         | n.a. |
| S3_vf_18829   | Phage DP_SC_6_H4_2017             | MT121964 | Clustered | VC_1490_0 | N6  | 121  | Unspecified      | Group I  | Duplodnaviria | Heunggongvine | Urovincota    | Caudoviricetes     | n.a.          | Unclassified   | O              | O            |      |
| S3_vf_25163   | uncultured phage cr109_1          | MT774399 | Clustered | VC_519_7  | N1  | 300  | Unspecified      | Group I  | Duplodnaviria | Heunggongvine | Urovincota    | Caudoviricetes     | Crassvirales  | Suolivirinae   | O              | O            |      |
| S3_vf_35073   | Faecalibacterium phage FP_cengus  | MG711463 | Clustered | VC_1083_1 | N20 | 53   | Faecalibacterium | Group I  | Duplodnaviria | Heunggongvine | Urovincota    | Caudoviricetes     | n.a.          | Unclassified   | O              | O            |      |
| S3_vf_44405   | Siphovirus 29632                  | KY053532 | Clustered | VC_826_0  | C2  | 16   | Unspecified      | Group I  | Duplodnaviria | Heunggongvine | Urovincota    | Caudoviricetes     | n.a.          | Unclassified   | Unclassified   | Unclassified |      |
| S3_vf_54353   | Clavibacter phage CMP1            | GQ241246 | Clustered | VC_80_0   | C2  | 14   | Clavibacter      | Group I  | Duplodnaviria | Heunggongvine | Urovincota    | Caudoviricetes     | n.a.          | Unclassified   | Unclassified   | Cimpunavirus |      |
| S3_vf_54498   | Microviridae sp.                  | MG945511 | Clustered | VC_1299_0 | C1  | 17   | Unspecified      | Group II | Monodnaviria  | Sangervine    | Phixviricota  | Malgrandaviricetes | Petitivirales | Microviridae   | Unclassified   | Unclassified |      |
| S3_vf_57422   | n.a.                              | n.a.     | Clustered | VC_1258_0 | A   | n.a. | n.a.             | n.a.     | n.a.          | n.a.          | n.a.          | n.a.               | n.a.          | n.a.           | n.a.           | n.a.         | n.a. |
| S3_vf_67333   | Roseburia phage Jekyll            | LR596902 | Clustered | VC_1254_0 | N20 | 6    | Roseburia        | Group I  | Duplodnaviria | Heunggongvine | Urovincota    | Caudoviricetes     | n.a.          | Unclassified   | O              | O            |      |
| S3_vf_67828   | Torsteo microvirus 13             | MK765563 | Clustered | VC_1299_0 | C1  | 21   | Unspecified      | Group II | Monodnaviria  | Sangervine    | Phixviricota  | Malgrandaviricetes | Petitivirales | Microviridae   | Unclassified   | Unclassified |      |
| S3_vf_70746   | Bifidobacterium phage BigBem1     | MT006237 | Clustered | VC_579_0  | C1  | 17   | Bifidobacterium  | Group I  | Duplodnaviria | Heunggongvine | Urovincota    | Caudoviricetes     | n.a.          | Unclassified   | Unclassified   | Unclassified |      |
| S3_vf_737597  | Phage vB_RanS_PJN03               | ON245412 | Clustered | VC_948_0  | N21 | 2    | Unspecified      | Group I  | Duplodnaviria | Heunggongvine | Urovincota    | Caudoviricetes     | n.a.          | Unclassified   | O              | O            |      |
| S3_vf_80287   | Clostridium phage phiCT453A       | KM983527 | Clustered | VC_151_0  | N23 | 22   | Clostridium      | Group I  | Duplodnaviria | Heunggongvine | Urovincota    | Caudoviricetes     | n.a.          | Unclassified   | O              | O            |      |

[illegible]

|              |                                          |          |           |           |     |      |                     |              |               |               |            |                |              |              |              |              |
|--------------|------------------------------------------|----------|-----------|-----------|-----|------|---------------------|--------------|---------------|---------------|------------|----------------|--------------|--------------|--------------|--------------|
| S5_vf_11450  | Geobacillus phage GBSV1                  | DQ340064 | Clustered | VC_778_0  | N37 | 6    | Geobacillus         | Group I      | Duplodnaviria | Heunggongvine | Urovincota | Caudoviricetes | n.a.         | Unclassified | O            | O            |
| S5_vf_122568 | Faecalibacterium phage FP_Tannis         | MG711467 | Clustered | VC_732_0  | N3  | 98   | Faecalibacterium    | Group I      | Duplodnaviria | Heunggongvine | Urovincota | Caudoviricetes | n.a.         | Unclassified | O            | O            |
| S5_vf_123990 | n.a.                                     | n.a.     | Clustered | VC_128_0  | A   | n.a. | n.a.                | n.a.         | n.a.          | n.a.          | n.a.       | n.a.           | n.a.         | n.a.         | n.a.         | n.a.         |
| S5_vf_134040 | Faecalibacterium phage FP_Mushu          | MG711460 | Clustered | VC_1288_0 | C3  | 100  | Faecalibacterium    | Group I      | Duplodnaviria | Heunggongvine | Urovincota | Caudoviricetes | n.a.         | Unclassified | Unclassified | Mushuvirus   |
| S5_vf_136076 | n.a.                                     | n.a.     | Clustered | VC_1552_0 | A   | n.a. | n.a.                | n.a.         | n.a.          | n.a.          | n.a.       | n.a.           | n.a.         | n.a.         | n.a.         | n.a.         |
| S5_vf_137260 | Bacteriophage sp.                        | OP549880 | Clustered | VC_1549_0 | N5  | 16   | Unspecified         | Unclassified | Unclassified  | n.a.          | n.a.       | n.a.           | n.a.         | Unclassified | O            | O            |
| S5_vf_145585 | Bacillus phage vB_BpsS-140               | MH884512 | Clustered | VC_638_0  | C1  | 6    | Bacillus            | Group I      | Duplodnaviria | Heunggongvine | Urovincota | Caudoviricetes | n.a.         | Unclassified | Unclassified | Unclassified |
| S5_vf_145588 | Clostridium phage phiCTP1                | HM159959 | Clustered | VC_921_0  | N4  | 8    | Clostridium         | Group I      | Duplodnaviria | Heunggongvine | Urovincota | Caudoviricetes | n.a.         | Unclassified | O            | O            |
| S5_vf_18461  | Phage vB_RanS_PJN03                      | QNZ45412 | Clustered | VC_951_1  | N15 | 4    | Unspecified         | Group I      | Duplodnaviria | Heunggongvine | Urovincota | Caudoviricetes | n.a.         | Unclassified | O            | O            |
| S5_vf_25423  | Lactococcus phage 936 group phage Phi4.2 | KP793123 | Clustered | VC_210_0  | C1  | 76   | Lactococcus         | Group I      | Duplodnaviria | Heunggongvine | Urovincota | Caudoviricetes | n.a.         | Unclassified | Unclassified | Skumavirus   |
| S5_vf_28061  | n.a.                                     | n.a.     | Clustered | VC_430_0  | A   | n.a. | n.a.                | n.a.         | n.a.          | n.a.          | n.a.       | n.a.           | n.a.         | n.a.         | n.a.         | n.a.         |
| S5_vf_55415  | Bacterioides phage crAss001              | MH675552 | Clustered | VC_1054_1 | C1  | 261  | Bacterioides        | Group I      | Duplodnaviria | Heunggongvine | Urovincota | Caudoviricetes | Crassvirales | Steigviridae | Asinivirinae | Keshiviruses |
| S5_vf_6032   | n.a.                                     | n.a.     | Clustered | VC_1511_0 | A   | n.a. | n.a.                | n.a.         | n.a.          | n.a.          | n.a.       | n.a.           | n.a.         | n.a.         | n.a.         | n.a.         |
| S5_vf_6506   | Clostridium phage vB_CpeS-1181           | MW478292 | Clustered | VC_923_0  | N1  | 28   | Clostridium         | Group I      | Duplodnaviria | Heunggongvine | Urovincota | Caudoviricetes | n.a.         | Unclassified | O            | O            |
| S5_vf_74661  | Escherichia phage TL-2011b               | JQ011317 | Clustered | VC_492_0  | C1  | 112  | Escherichia         | Group I      | Duplodnaviria | Heunggongvine | Urovincota | Caudoviricetes | n.a.         | Unclassified | Unclassified | Unclassified |
| S5_vf_77701  | Bifidobacterium phage BitterVaud1        | MT006236 | Clustered | VC_826_0  | C2  | 11   | Bifidobacterium     | Group I      | Duplodnaviria | Heunggongvine | Urovincota | Caudoviricetes | n.a.         | Unclassified | Unclassified | Unclassified |
| S5_vf_8965   | Bacterioides phage F4                    | MT806185 | Clustered | VC_1505_0 | N9  | 11   | Bacterioides        | Group I      | Duplodnaviria | Heunggongvine | Urovincota | Caudoviricetes | n.a.         | Unclassified | O            | O            |
| S5_vs_107105 | Butyrivibrio phage Idris                 | MN882554 | Clustered | VC_724_0  | N15 | 4    | Butyrivibrio        | Group I      | Duplodnaviria | Heunggongvine | Urovincota | Caudoviricetes | n.a.         | Unclassified | O            | O            |
| S5_vs_116255 | Streptococcus phage Javan261             | MK448720 | Clustered | VC_905_0  | N10 | 7    | Streptococcus       | Group I      | Duplodnaviria | Heunggongvine | Urovincota | Caudoviricetes | n.a.         | Unclassified | O            | O            |
| S5_vs_120079 | Roseburia phage Jekyll                   | LR596902 | Clustered | VC_1252_0 | C1  | 68   | Roseburia           | Group I      | Duplodnaviria | Heunggongvine | Urovincota | Caudoviricetes | n.a.         | Unclassified | Unclassified | Unclassified |
| S5_vs_121419 | n.a.                                     | n.a.     | Clustered | VC_1570_0 | A   | n.a. | n.a.                | n.a.         | n.a.          | n.a.          | n.a.       | n.a.           | n.a.         | n.a.         | n.a.         | n.a.         |
| S5_vs_123256 | Bacterioides phage p00                   | BK010646 | Clustered | VC_695_0  | C5  | 15   | Bacterioides        | Group I      | Duplodnaviria | Heunggongvine | Urovincota | Caudoviricetes | n.a.         | Unclassified | Unclassified | Unclassified |
| S5_vs_124035 | n.a.                                     | n.a.     | Clustered | VC_1614_0 | F   | n.a. | n.a.                | n.a.         | n.a.          | n.a.          | n.a.       | n.a.           | n.a.         | n.a.         | n.a.         | n.a.         |
| S5_vs_129970 | n.a.                                     | n.a.     | Clustered | VC_1572_0 | A   | n.a. | n.a.                | n.a.         | n.a.          | n.a.          | n.a.       | n.a.           | n.a.         | n.a.         | n.a.         | n.a.         |
| S5_vs_13090  | n.a.                                     | n.a.     | Clustered | VC_1587_0 | A   | n.a. | n.a.                | n.a.         | n.a.          | n.a.          | n.a.       | n.a.           | n.a.         | n.a.         | n.a.         | n.a.         |
| S5_vs_130958 | Faecalibacterium phage FP_Tannis         | MG711467 | Clustered | VC_732_0  | N3  | 75   | Faecalibacterium    | Group I      | Duplodnaviria | Heunggongvine | Urovincota | Caudoviricetes | n.a.         | Unclassified | O            | O            |
| S5_vs_1338   | n.a.                                     | n.a.     | Clustered | VC_1582_0 | A   | n.a. | n.a.                | n.a.         | n.a.          | n.a.          | n.a.       | n.a.           | n.a.         | n.a.         | n.a.         | n.a.         |
| S5_vs_136679 | n.a.                                     | n.a.     | Clustered | VC_1291_0 | A   | n.a. | n.a.                | n.a.         | n.a.          | n.a.          | n.a.       | n.a.           | n.a.         | n.a.         | n.a.         | n.a.         |
| S5_vs_137154 | Clostridium phage PhiS63                 | QJ660954 | Clustered | VC_747_0  | N2  | 5    | Clostridium         | Group I      | Duplodnaviria | Heunggongvine | Urovincota | Caudoviricetes | n.a.         | Unclassified | O            | O            |
| S5_vs_138980 | Clostridium phage phiCT19406B            | KM983351 | Clustered | VC_660_0  | N9  | 9    | Clostridium         | Group I      | Duplodnaviria | Heunggongvine | Urovincota | Caudoviricetes | n.a.         | Unclassified | O            | O            |
| S5_vs_139401 | n.a.                                     | n.a.     | Clustered | VC_1587_0 | A   | n.a. | n.a.                | n.a.         | n.a.          | n.a.          | n.a.       | n.a.           | n.a.         | n.a.         | n.a.         | n.a.         |
| S5_vs_140946 | n.a.                                     | n.a.     | Clustered | VC_1615_0 | A   | n.a. | n.a.                | n.a.         | n.a.          | n.a.          | n.a.       | n.a.           | n.a.         | n.a.         | n.a.         | n.a.         |
| S5_vs_142195 | S5_vs_142195                             | n.a.     | Clustered | VC_105_0  | A   | n.a. | n.a.                | n.a.         | n.a.          | n.a.          | n.a.       | n.a.           | n.a.         | n.a.         | n.a.         | n.a.         |
| S5_vs_142450 | Clostridium phage HM2                    | LT600745 | Clustered | VC_1261_0 | N36 | 4    | Clostridium         | Group I      | Duplodnaviria | Heunggongvine | Urovincota | Caudoviricetes | n.a.         | Unclassified | O            | O            |
| S5_vs_145026 | n.a.                                     | n.a.     | Clustered | VC_1291_0 | A   | n.a. | n.a.                | n.a.         | n.a.          | n.a.          | n.a.       | n.a.           | n.a.         | n.a.         | n.a.         | n.a.         |
| S5_vs_145581 | n.a.                                     | n.a.     | Clustered | VC_658_0  | A   | n.a. | n.a.                | n.a.         | n.a.          | n.a.          | n.a.       | n.a.           | n.a.         | n.a.         | n.a.         | n.a.         |
| S5_vs_145590 | Enterococcus phage EFC-1                 | KJ608188 | Clustered | VC_278_0  | N12 | 14   | Enterococcus        | Group I      | Duplodnaviria | Heunggongvine | Urovincota | Caudoviricetes | n.a.         | Unclassified | O            | O            |
| S5_vs_145592 | n.a.                                     | n.a.     | Clustered | VC_1554_0 | A   | n.a. | n.a.                | n.a.         | n.a.          | n.a.          | n.a.       | n.a.           | n.a.         | n.a.         | n.a.         | n.a.         |
| S5_vs_145593 | n.a.                                     | n.a.     | Clustered | VC_1615_0 | F   | n.a. | n.a.                | n.a.         | n.a.          | n.a.          | n.a.       | n.a.           | n.a.         | n.a.         | n.a.         | n.a.         |
| S5_vs_145597 | Thermoaerobacterium phage THSA-485A      | CP003186 | Clustered | VC_724_0  | N12 | 3    | Thermoaerobacterium | Group I      | Duplodnaviria | Heunggongvine | Urovincota | Caudoviricetes | n.a.         | Unclassified | O            | O            |
| S5_vs_145598 | Clostridium phage CDMH1                  | HG531805 | Clustered | VC_151_0  | N11 | 25   | Clostridium         | Group I      | Duplodnaviria | Heunggongvine | Urovincota | Caudoviricetes | n.a.         | Unclassified | O            | O            |
| S5_vs_145599 | Bacteriophage sp.                        | LT796078 | Clustered | VC_278_0  | N26 | 4    | Unspecified         | Unclassified | Unclassified  | n.a.          | n.a.       | n.a.           | n.a.         | Unclassified | O            | O            |
| S5_vs_145601 | Streptococcus phage MismyG               | OL714867 | Clustered | VC_152_0  | N11 | 7    | Streptococcus       | Group I      | Duplodnaviria | Heunggongvine | Urovincota | Caudoviricetes | n.a.         | Unclassified | O            | O            |
| S5_vs_145602 | Enterococcus phage EFC-1                 | KJ608188 | Clustered | VC_278_0  | N11 | 13   | Enterococcus        | Group I      | Duplodnaviria | Heunggongvine | Urovincota | Caudoviricetes | n.a.         | Unclassified | O            | O            |
| S5_vs_145605 | Bacillus phage vB_BanS_Athens            | OK530002 | Clustered | VC_946_0  | N8  | 2    | Bacillus            | Group I      | Duplodnaviria | Heunggongvine | Urovincota | Caudoviricetes | n.a.         | Unclassified | O            | O            |
| S5_vs_1572   | Panbacterioides phage PDS1               | MN929097 | Clustered | VC_855_0  | C4  | 120  | Panbacterioides     | n.a.         | Duplodnaviria | Heunggongvine | Urovincota | Caudoviricetes | n.a.         | Unclassified | Unclassified | Unclassified |
| S5_vs_17520  | n.a.                                     | n.a.     | Clustered | VC_1587_0 | A   | n.a. | n.a.                | n.a.         | n.a.          | n.a.          | n.a.       | n.a.           | n.a.         | n.a.         | n.a.         | n.a.         |
| S5_vs_20268  | Paenibacillus phage PGI                  | HQ332138 | Clustered | VC_349_0  | C1  | 11   | Paenibacillus       | Group I      | Duplodnaviria | Heunggongvine | Urovincota | Caudoviricetes | n.a.         | Unclassified | Unclassified | Unclassified |
| S5_vs_20500  | Pasteurella phage AFS-2018a              | MH238466 | Clustered | VC_630_0  | N4  | 5    | Pasteurella         | Group I      | Duplodnaviria | Heunggongvine | Urovincota | Caudoviricetes | n.a.         | Unclassified | O            | O            |
| S5_vs_28263  | n.a.                                     | n.a.     | Clustered | VC_1587_0 | A   | n.a. | n.a.                | n.a.         | n.a.          | n.a.          | n.a.       | n.a.           | n.a.         | n.a.         | n.a.         | n.a.         |
| S5_vs_2876   | Lactococcus phage CAP                    | MZ308445 | Clustered | VC_278_0  | N13 | 5    | Lactococcus         | Group I      | Duplodnaviria | Heunggongvine | Urovincota | Caudoviricetes | n.a.         | Unclassified | O            | O            |
| S5_vs_3183   | Bacillus phage vB_BpsS-140               | MH884512 | Clustered | VC_782_0  | N11 | 1    | Bacillus            | Group I      | Duplodnaviria | Heunggongvine | Urovincota | Caudoviricetes | n.a.         | Unclassified | O            | O            |
| S5_vs_3501   | Clostridium phage vB_CpeS-CP51           | KC237729 | Clustered | VC_1035_0 | N2  | 11   | Clostridium         | Group I      | Duplodnaviria | Heunggongvine | Urovincota | Caudoviricetes | n.a.         | Unclassified | O            | O            |
| S5_vs_38949  | Faecalibacterium phage FP_Epona          | MG711462 | Clustered | VC_723_0  | C13 | 52   | Faecalibacterium    | Group I      | Duplodnaviria | Heunggongvine | Urovincota | Caudoviricetes | n.a.         | Unclassified | Unclassified | Eponavirus   |
| S5_vs_40848  | Streptococcus phage Javan630             | MK448997 | Clustered | VC_649_0  | N6  | 56   | Streptococcus       | Group I      | Duplodnaviria | Heunggongvine | Urovincota | Caudoviricetes | n.a.         | Unclassified | O            | O            |
| S5_vs_49480  | Geobacillus phage GBSV1                  | DQ340064 | Clustered | VC_778_0  | N37 | 6    | Geobacillus         | Group I      | Duplodnaviria | Heunggongvine | Urovincota | Caudoviricetes | n.a.         | Unclassified | O            | O            |
| S5_vs_56083  | n.a.                                     | n.a.     | Clustered | VC_1274_0 | A   | n.a. | n.a.                | n.a.         | n.a.          | n.a.          | n.a.       | n.a.           | n.a.         | n.a.         | n.a.         | n.a.         |
| S5_vs_58766  | Clostridium phage phiCD38-2              | HM568888 | Clustered | VC_923_0  | N14 | 8    | Clostridium         | Group I      | Duplodnaviria | Heunggongvine | Urovincota | Caudoviricetes | n.a.         | Unclassified | O            | O            |
| S5_vs_58859  | Geobacillus phage GBSV1                  | DQ340064 | Clustered | VC_779_0  | N41 | 2    | Geobacillus         | Group I      | Duplodnaviria | Heunggongvine | Urovincota | Caudoviricetes | n.a.         | Unclassified | O            | O            |
| S5_vs_63924  | Bifidobacterium phage BigBem1            | MT006237 | Clustered | VC_879_0  | C2  | 32   | Bifidobacterium     | Group I      | Duplodnaviria | Heunggongvine | Urovincota | Caudoviricetes | n.a.         | Unclassified | Unclassified | Unclassified |
| S5_vs_67958  | n.a.                                     | n.a.     | Clustered | VC_1554_0 | A   | n.a. | n.a.                | n.a.         | n.a.          | n.a.          | n.a.       | n.a.           | n.a.         | n.a.         | n.a.         | n.a.         |
| S5_vs_69083  | Winogradskyella phage Petermella_1       | MT732475 | Clustered | VC_696_0  | N3  | 27   | Winogradskyella     | Group I      | Duplodnaviria | Heunggongvine | Urovincota | Caudoviricetes | n.a.         | Unclassified | O            | O            |
| S5_vs_74199  | n.a.                                     | n.a.     | Clustered | VC_1291_0 | A   | n.a. | n.a.                | n.a.         | n.a.          | n.a.          | n.a.       | n.a.           | n.a.         | n.a.         | n.a.         | n.a.         |
| S5_vs_7444   | n.a.                                     | n.a.     | Clustered | VC_1614_0 | F   | n.a. | n.a.                | n.a.         | n.a.          | n.a.          | n.a.       | n.a.           | n.a.         | n.a.         | n.a.         | n.a.         |
| S5_vs_76500  | Bacterioides phage p00                   | BK010646 | Clustered | VC_695_0  | C6  | 20   | Bacterioides        | Group I      | Duplodnaviria | Heunggongvine | Urovincota | Caudoviricetes | n.a.         | Unclassified | Unclassified | Unclassified |
| S5_vs_79992  | Winogradskyella phage Petermella_1       | MT732475 | Clustered | VC_696_0  | N3  | 24   | Winogradskyella     | Group I      | Duplodnaviria | Heunggongvine | Urovincota | Caudoviricetes | n.a.         | Unclassified | O            | O            |
| S5_vs_80498  | Lactococcus phage Tuc2009                | AF109874 | Clustered | VC_278_0  | N9  | 11   | Lactococcus         | Group I      | Duplodnaviria | Heunggongvine | Urovincota | Caudoviricetes | n.a.         | Unclassified | O            | O            |
| S5_vs_83886  | n.a.                                     | n.a.     | Clustered | VC_920_0  | A   | n.a. | n.a.                | n.a.         | n.a.          | n.a.          | n.a.       | n.a.           | n.a.         | n.a.         | n.a.         | n.a.         |
| S5_vs_84946  | Streptococcus phage Javan290             | MK448900 | Clustered | VC_332_0  | N27 | 5    | Streptococcus       | Group I      | Duplodnaviria | Heunggongvine | Urovincota | Caudoviricetes | n.a.         | Unclassified | O            | O            |
| S5_vs_85065  | Faecalibacterium phage FP_cengus         | MG711463 | Clustered | VC_1085_1 | N17 | 70   | Faecalibacterium    | Group I      | Duplodnaviria | Heunggongvine | Urovincota | Caudoviricetes | n.a.         | Unclassified | O            | O            |
| S5_vs_86562  | Alkermansia phage DTMo-2021a             | CP084202 | Clustered | VC_752_0  | N2  | 15   | Alkermansia         | Group I      | Duplodnaviria | Heunggongvine | Urovincota | Caudoviricetes | n.a.         | Unclassified | O            | O            |
| S5_vs_8847   | Streptococcus phage Javan191             | MK448700 | Clustered | VC_649_1  | C2  | 63   | Streptococcus       | Group I      | Duplodnaviria | Heunggongvine | Urovincota | Caudoviricetes | n.a.         | Unclassified | Unclassified | Unclassified |
| S5_vs_93839  | Flavobacterium phage IF4                 | MN850656 | Clustered | VC_694_0  | N2  | 23   | Flavobacterium      | Group I      | Duplodnaviria | Heunggongvine | Urovincota | Caudoviricetes | n.a.         | Unclassified | O            | O            |
| S5_vs_9747   | n.a.                                     | n.a.     | Clustered | VC_1595_0 | A   | n.a. | n.a.                | n.a.         | n.a.          | n.a.          | n.a.       | n.a.           | n.a.         | n.a.         | n.a.         | n.a.         |
| S6_vf_25710  | n.a.                                     | n.a.     | Clustered | VC_750_0  | A   | n.a. | n.a.                | n.a.         | n.a.          | n.a.          | n.a.       | n.a.           | n.a.         | n.a.         | n.a.         | n.a.         |
| S6_vf_3435   | Lactococcus phage 62403                  | MF443120 | Clustered | VC_706_0  | C1  | 75   | Lactococcus         | Group I      | Duplodnaviria | Heunggongvine | Urovincota | Caudoviricetes | n.a.         | Unclassified | Unclassified | Cedavovirus  |
| S6_vf_45228  | Clostridium phage HM2                    | LT600745 | Clustered | VC_1261_0 | N33 | 4    | Clostridium         | Group I      | Duplodnaviria | Heunggongvine | Urovincota | Caudoviricetes | n.a.         | Unclassified | O            | O            |
| S6_vf_45618  | Eggerthella phage PMBT5                  | MH626557 | Clustered | VC_1421_0 | N42 | 2    | Eggerthella         | Group I      | Duplodnaviria | Heunggongvine | Urovincota | Caudoviricetes | n.a.         | Unclassified | O            | O            |
| S6_vf_56486  | Bacterioides phage SJC03                 | MT074146 | Clustered | VC_963_0  | N5  | 49   | Bacterioides        | Group I      | Duplodnaviria | Heunggongvine | Urovincota | Caudoviricetes | n.a.         | Unclassified | O            | O            |
| S6_vf_6314   | n.a.                                     | n.a.     | Clustered | VC_1607_0 | F   | n.a. | n.a.                | n.a.         | n.a.          | n.a.          | n.a.       | n.a.           | n.a.         | n.a.         | n.a.         | n.a.         |
| S6_vs_10314  | Butyrivibrio phage Idris                 | MN882554 | Clustered | VC_1289_0 | N4  | 38   | Butyrivibrio        | Group I      | Duplodnaviria | Heunggongvine | Urovincota | Caudoviricetes | n.a.         | Unclassified | O            | O            |
| S6_vs_12945  | Clostridioides phage CD1801              | MW512570 | Clustered | VC_670_0  | N10 | 7    | Clostridioides      | Group I      | Duplodnaviria | Heunggongvine | Urovincota | Caudoviricetes | n.a.         | Unclassified | O            | O            |

|              |                                    |           |           |           |     |      |                  |              |               |                |               |                    |              |                |                 |               |               |
|--------------|------------------------------------|-----------|-----------|-----------|-----|------|------------------|--------------|---------------|----------------|---------------|--------------------|--------------|----------------|-----------------|---------------|---------------|
| S6_vs_15813  | n.a.                               | n.a.      | Clustered | VC_1481_0 | A   | n.a. | n.a.             | n.a.         | n.a.          | n.a.           | n.a.          | n.a.               | n.a.         | n.a.           | n.a.            | n.a.          | n.a.          |
| S6_vs_32886  | n.a.                               | n.a.      | Clustered | VC_1590_0 | A   | n.a. | n.a.             | n.a.         | n.a.          | n.a.           | n.a.          | n.a.               | n.a.         | n.a.           | n.a.            | n.a.          | n.a.          |
| S6_vs_33711  | Bacillus phage vB_BIS_BMBtp13      | KX1190832 | Clustered | VC_667_0  | C7  | 7    | Bacillus         | Group I      | Duplodnaviria | Heunggongvinae | Urovincota    | Caudoviricetes     | n.a.         | Unclassified   | Unclassified    | Unclassified  | Unclassified  |
| S6_vs_38250  | Bacillus phage vB_BIS_BMBtp13      | KX1190832 | Clustered | VC_667_0  | C8  | 6    | Bacillus         | Group I      | Duplodnaviria | Heunggongvinae | Urovincota    | Caudoviricetes     | n.a.         | Unclassified   | Unclassified    | Unclassified  | Unclassified  |
| S6_vs_39025  | Clostridioides phage CDI801        | MW512570  | Clustered | VC_670_0  | N11 | 6    | Clostridioides   | Group I      | Duplodnaviria | Heunggongvinae | Urovincota    | Caudoviricetes     | n.a.         | Unclassified   | O               | O             | O             |
| S6_vs_46039  | n.a.                               | n.a.      | Clustered | VC_1612_0 | A   | n.a. | n.a.             | n.a.         | n.a.          | n.a.           | n.a.          | n.a.               | n.a.         | n.a.           | n.a.            | n.a.          | n.a.          |
| S6_vs_54606  | Butyrivibrio phage Idris           | MN882554  | Clustered | VC_1289_0 | N4  | 33   | Butyrivibrio     | Group I      | Duplodnaviria | Heunggongvinae | Urovincota    | Caudoviricetes     | n.a.         | Unclassified   | O               | O             | O             |
| S6_vs_56490  | Geobacillus phage GBSV1            | DQ340064  | Clustered | VC_278_0  | N39 | 2    | Geobacillus      | Group I      | Duplodnaviria | Heunggongvinae | Urovincota    | Caudoviricetes     | n.a.         | Unclassified   | O               | O             | O             |
| S6_vs_56491  | Lactococcus phage CAP              | MZ308445  | Clustered | VC_278_0  | N22 | 2    | Lactococcus      | Group I      | Duplodnaviria | Heunggongvinae | Urovincota    | Caudoviricetes     | n.a.         | Unclassified   | O               | O             | O             |
| S6_vs_56493  | n.a.                               | n.a.      | Clustered | VC_1601_0 | F   | n.a. | n.a.             | n.a.         | n.a.          | n.a.           | n.a.          | n.a.               | n.a.         | n.a.           | n.a.            | n.a.          | n.a.          |
| S6_vs_56496  | Faecalibacterium phage FP_Epona    | MG711462  | Clustered | VC_723_0  | C2  | 104  | Faecalibacterium | Group I      | Duplodnaviria | Heunggongvinae | Urovincota    | Caudoviricetes     | n.a.         | Unclassified   | Unclassified    | Eponavirus    | Eponavirus    |
| S6_vs_56498  | Butyrivibrio phage Idris           | MN882554  | Clustered | VC_1289_0 | N5  | 41   | Butyrivibrio     | Group I      | Duplodnaviria | Heunggongvinae | Urovincota    | Caudoviricetes     | n.a.         | Unclassified   | O               | O             | O             |
| S6_vs_9784   | n.a.                               | n.a.      | Clustered | VC_1505_0 | A   | n.a. | n.a.             | n.a.         | n.a.          | n.a.           | n.a.          | n.a.               | n.a.         | n.a.           | n.a.            | n.a.          | n.a.          |
| S7_vc_114476 | Butyrivibrio virus Anian           | MN882551  | Clustered | VC_720_0  | N6  | 14   | Butyrivibrio     | Group I      | Duplodnaviria | Heunggongvinae | Urovincota    | Caudoviricetes     | n.a.         | Unclassified   | O               | O             | O             |
| S7_vc_117697 | n.a.                               | n.a.      | Clustered | VC_1576_0 | A   | n.a. | n.a.             | n.a.         | n.a.          | n.a.           | n.a.          | n.a.               | n.a.         | n.a.           | n.a.            | n.a.          | n.a.          |
| S7_vc_134023 | n.a.                               | n.a.      | Clustered | VC_1590_0 | A   | n.a. | n.a.             | n.a.         | n.a.          | n.a.           | n.a.          | n.a.               | n.a.         | n.a.           | n.a.            | n.a.          | n.a.          |
| S7_vc_135778 | Bacillus phage vB_BanS_Athens      | OK500002  | Clustered | VC_946_0  | N8  | 2    | Bacillus         | Group I      | Duplodnaviria | Heunggongvinae | Urovincota    | Caudoviricetes     | n.a.         | Unclassified   | O               | O             | O             |
| S7_vc_138019 | n.a.                               | n.a.      | Clustered | VC_1615_0 | F   | n.a. | n.a.             | n.a.         | n.a.          | n.a.           | n.a.          | n.a.               | n.a.         | n.a.           | n.a.            | n.a.          | n.a.          |
| S7_vc_138069 | n.a.                               | n.a.      | Clustered | VC_1564_0 | F   | n.a. | n.a.             | n.a.         | n.a.          | n.a.           | n.a.          | n.a.               | n.a.         | n.a.           | n.a.            | n.a.          | n.a.          |
| S7_vc_19866  | Clostridium phage HM2              | LT600745  | Clustered | VC_1258_0 | N44 | 3    | Clostridium      | Group I      | Duplodnaviria | Heunggongvinae | Urovincota    | Caudoviricetes     | n.a.         | Salasmaviridae | O               | O             | O             |
| S7_vc_20120  | Bacteriophage sp.                  | QPS49880  | Clustered | VC_1540_0 | N5  | 16   | Unspecified      | Unclassified | Unclassified  | n.a.           | n.a.          | n.a.               | n.a.         | n.a.           | n.a.            | n.a.          | n.a.          |
| S7_vc_27437  | n.a.                               | n.a.      | Clustered | VC_1607_0 | F   | n.a. | n.a.             | n.a.         | n.a.          | n.a.           | n.a.          | n.a.               | n.a.         | n.a.           | n.a.            | n.a.          | n.a.          |
| S7_vc_28429  | Cellulophaga phage phi17:2         | KC821609  | Clustered | VC_1055_0 | N8  | 4    | Cellulophaga     | Group I      | Duplodnaviria | Heunggongvinae | Urovincota    | Caudoviricetes     | n.a.         | Unclassified   | O               | O             | O             |
| S7_vc_29196  | n.a.                               | n.a.      | Clustered | VC_1554_0 | A   | n.a. | n.a.             | n.a.         | n.a.          | n.a.           | n.a.          | n.a.               | n.a.         | n.a.           | n.a.            | n.a.          | n.a.          |
| S7_vc_32559  | n.a.                               | n.a.      | Clustered | VC_1258_0 | A   | n.a. | n.a.             | n.a.         | n.a.          | n.a.           | n.a.          | n.a.               | n.a.         | n.a.           | n.a.            | n.a.          | n.a.          |
| S7_vc_36627  | n.a.                               | n.a.      | Clustered | VC_1258_0 | A   | n.a. | n.a.             | n.a.         | n.a.          | n.a.           | n.a.          | n.a.               | n.a.         | n.a.           | n.a.            | n.a.          | n.a.          |
| S7_vc_38697  | Faecalibacterium phage FP_oengus   | MG711463  | Clustered | VC_1085_1 | N18 | 59   | Faecalibacterium | Group I      | Duplodnaviria | Heunggongvinae | Urovincota    | Caudoviricetes     | n.a.         | Unclassified   | O               | O             | O             |
| S7_vc_39724  | Faecalibacterium phage FP_Mushu    | MG711460  | Clustered | VC_1288_0 | C1  | 171  | Faecalibacterium | Group I      | Duplodnaviria | Heunggongvinae | Urovincota    | Caudoviricetes     | n.a.         | Unclassified   | Unclassified    | Mushuvirus    | Mushuvirus    |
| S7_vc_5439   | Faecalibacterium phage FP_Epona    | MG711462  | Clustered | VC_723_0  | C1  | 118  | Faecalibacterium | Group I      | Duplodnaviria | Heunggongvinae | Urovincota    | Caudoviricetes     | n.a.         | Unclassified   | Unclassified    | Eponavirus    | Eponavirus    |
| S7_vc_5843   | Curtobacterium phage Penoun        | MZ333133  | Clustered | VC_1195_0 | N3  | 4    | Curtobacterium   | Group I      | Duplodnaviria | Heunggongvinae | Urovincota    | Caudoviricetes     | n.a.         | Unclassified   | O               | O             | O             |
| S7_vc_60968  | Ruminococcus phage phiRgPS_6       | MT190839  | Clustered | VC_278_0  | N1  | 47   | Ruminococcus     | Group I      | Duplodnaviria | Heunggongvinae | Urovincota    | Caudoviricetes     | n.a.         | Unclassified   | O               | O             | O             |
| S7_vc_63894  | Leuconostoc phage 1-A4             | Q3451696  | Clustered | VC_889_0  | C2  | 116  | Leuconostoc      | Group I      | Duplodnaviria | Heunggongvinae | Urovincota    | Caudoviricetes     | n.a.         | Unclassified   | Microkeyvirinae | Unassigned    | Unassigned    |
| S7_vc_68546  | Clostridium phage phiCp-D          | MW478291  | Clustered | VC_921_0  | N4  | 12   | Clostridium      | Group I      | Duplodnaviria | Heunggongvinae | Urovincota    | Caudoviricetes     | n.a.         | Unclassified   | O               | O             | O             |
| S7_vc_69348  | n.a.                               | n.a.      | Clustered | VC_1258_0 | A   | n.a. | n.a.             | n.a.         | n.a.          | n.a.           | n.a.          | n.a.               | n.a.         | n.a.           | n.a.            | n.a.          | n.a.          |
| S7_vc_71527  | n.a.                               | n.a.      | Clustered | VC_1616_0 | F   | n.a. | n.a.             | n.a.         | n.a.          | n.a.           | n.a.          | n.a.               | n.a.         | n.a.           | n.a.            | n.a.          | n.a.          |
| S7_vc_76382  | Clostridium phage HM2              | LT600745  | Clustered | VC_1261_0 | N20 | 7    | Clostridium      | Group I      | Duplodnaviria | Heunggongvinae | Urovincota    | Caudoviricetes     | n.a.         | Salasmaviridae | O               | O             | O             |
| S7_vc_76463  | n.a.                               | n.a.      | Clustered | VC_1552_0 | A   | n.a. | n.a.             | n.a.         | n.a.          | n.a.           | n.a.          | n.a.               | n.a.         | n.a.           | n.a.            | n.a.          | n.a.          |
| S7_vc_84974  | Clostridioides phage ES-S-0173-01  | CP067352  | Clustered | VC_748_0  | N12 | 1    | Clostridioides   | Group I      | Duplodnaviria | Heunggongvinae | Urovincota    | Caudoviricetes     | n.a.         | Unclassified   | O               | O             | O             |
| S7_vc_89197  | Lactococcus phage vB_LLC_hBB14     | MHT79519  | Clustered | VC_706_0  | C1  | 113  | Lactococcus      | Group I      | Duplodnaviria | Heunggongvinae | Urovincota    | Caudoviricetes     | n.a.         | Unclassified   | Unclassified    | Cedovirus     | Cedovirus     |
| S7_vs_100640 | n.a.                               | n.a.      | Clustered | VC_1587_0 | A   | n.a. | n.a.             | n.a.         | n.a.          | n.a.           | n.a.          | n.a.               | n.a.         | n.a.           | n.a.            | n.a.          | n.a.          |
| S7_vs_11081  | Bacteriodes phage p00              | BK010646  | Clustered | VC_695_0  | C5  | 43   | Bacteriodes      | Group I      | Duplodnaviria | Heunggongvinae | Urovincota    | Caudoviricetes     | n.a.         | Unclassified   | Unclassified    | Unclassified  | Unclassified  |
| S7_vs_111831 | Streptococcus phage Javan580       | MK448989  | Clustered | VC_558_0  | N10 | 8    | Streptococcus    | Group I      | Duplodnaviria | Heunggongvinae | Urovincota    | Caudoviricetes     | n.a.         | Unclassified   | O               | O             | O             |
| S7_vs_118295 | n.a.                               | n.a.      | Clustered | VC_1481_0 | A   | n.a. | n.a.             | n.a.         | n.a.          | n.a.           | n.a.          | n.a.               | n.a.         | n.a.           | n.a.            | n.a.          | n.a.          |
| S7_vs_119492 | Clostridium phage HM2              | LT600745  | Clustered | VC_1261_0 | N36 | 4    | Clostridium      | Group I      | Duplodnaviria | Heunggongvinae | Urovincota    | Caudoviricetes     | n.a.         | Salasmaviridae | O               | O             | O             |
| S7_vs_119679 | Winogradskyella phage Petemella_1  | M1732475  | Clustered | VC_696_0  | N4  | 22   | Winogradskyella  | Group I      | Duplodnaviria | Heunggongvinae | Urovincota    | Caudoviricetes     | n.a.         | Unclassified   | O               | O             | O             |
| S7_vs_122151 | n.a.                               | n.a.      | Clustered | VC_779_0  | A   | n.a. | n.a.             | n.a.         | n.a.          | n.a.           | n.a.          | n.a.               | n.a.         | n.a.           | n.a.            | n.a.          | n.a.          |
| S7_vs_129271 | n.a.                               | n.a.      | Clustered | VC_1578_0 | A   | n.a. | n.a.             | n.a.         | n.a.          | n.a.           | n.a.          | n.a.               | n.a.         | n.a.           | n.a.            | n.a.          | n.a.          |
| S7_vs_129858 | n.a.                               | n.a.      | Clustered | VC_1620_0 | F   | n.a. | n.a.             | n.a.         | n.a.          | n.a.           | n.a.          | n.a.               | n.a.         | n.a.           | n.a.            | n.a.          | n.a.          |
| S7_vs_13041  | Butyrivibrio virus Anian           | MN882551  | Clustered | VC_720_0  | N6  | 14   | Butyrivibrio     | Group I      | Duplodnaviria | Heunggongvinae | Urovincota    | Caudoviricetes     | n.a.         | Unclassified   | O               | O             | O             |
| S7_vs_134391 | n.a.                               | n.a.      | Clustered | VC_1568_0 | A   | n.a. | n.a.             | n.a.         | n.a.          | n.a.           | n.a.          | n.a.               | n.a.         | n.a.           | n.a.            | n.a.          | n.a.          |
| S7_vs_134583 | Faecalibacterium phage FP_Toutatis | MG711466  | Clustered | VC_728_0  | C4  | 56   | Faecalibacterium | Group I      | Duplodnaviria | Heunggongvinae | Urovincota    | Caudoviricetes     | n.a.         | Unclassified   | Unclassified    | Toutatisvirus | Toutatisvirus |
| S7_vs_135828 | Microviridae sp.                   | MG945563  | Clustered | VC_1335_0 | C1  | 9    | Unspecified      | Group II     | Monodnaviria  | Sangervinae    | Phixiviricota | Malgrandaviricetes | Petitvirales | Microviridae   | Unclassified    | Unclassified  | Unclassified  |
| S7_vs_136164 | n.a.                               | n.a.      | Clustered | VC_1570_0 | A   | n.a. | n.a.             | n.a.         | n.a.          | n.a.           | n.a.          | n.a.               | n.a.         | n.a.           | n.a.            | n.a.          | n.a.          |
| S7_vs_137915 | Bacteriodes phage DAC16            | MT074137  | Clustered | VC_963_0  | N5  | 42   | Bacteriodes      | Group I      | Duplodnaviria | Heunggongvinae | Urovincota    | Caudoviricetes     | n.a.         | Unclassified   | O               | O             | O             |
| S7_vs_13799  | Roseburia phage Jekyll             | LR596902  | Clustered | VC_278_0  | N14 | 5    | Roseburia        | Group I      | Duplodnaviria | Heunggongvinae | Urovincota    | Caudoviricetes     | n.a.         | Unclassified   | O               | O             | O             |
| S7_vs_138096 | n.a.                               | n.a.      | Clustered | VC_1570_0 | A   | n.a. | n.a.             | n.a.         | n.a.          | n.a.           | n.a.          | n.a.               | n.a.         | n.a.           | n.a.            | n.a.          | n.a.          |
| S7_vs_138109 | Lactococcus phage CAP              | MZ308445  | Clustered | VC_278_0  | N13 | 8    | Lactococcus      | Group I      | Duplodnaviria | Heunggongvinae | Urovincota    | Caudoviricetes     | n.a.         | Unclassified   | O               | O             | O             |
| S7_vs_138173 | Phage vB_RanS_PJN03                | QNZ45412  | Clustered | VC_950_0  | N13 | 5    | Unspecified      | Group I      | Duplodnaviria | Heunggongvinae | Urovincota    | Caudoviricetes     | n.a.         | Unclassified   | O               | O             | O             |
| S7_vs_20200  | n.a.                               | n.a.      | Clustered | VC_1291_0 | A   | n.a. | n.a.             | n.a.         | n.a.          | n.a.           | n.a.          | n.a.               | n.a.         | n.a.           | n.a.            | n.a.          | n.a.          |
| S7_vs_2599   | n.a.                               | n.a.      | Clustered | VC_1572_0 | A   | n.a. | n.a.             | n.a.         | n.a.          | n.a.           | n.a.          | n.a.               | n.a.         | n.a.           | n.a.            | n.a.          | n.a.          |
| S7_vs_27530  | n.a.                               | n.a.      | Clustered | VC_1567_0 | A   | n.a. | n.a.             | n.a.         | n.a.          | n.a.           | n.a.          | n.a.               | n.a.         | n.a.           | n.a.            | n.a.          | n.a.          |
| S7_vs_28733  | Faecalibacterium phage FP_Lugh     | MG711464  | Clustered | VC_923_0  | N19 | 4    | Faecalibacterium | Group I      | Duplodnaviria | Heunggongvinae | Urovincota    | Caudoviricetes     | n.a.         | Unclassified   | O               | O             | O             |
| S7_vs_38113  | Geobacillus phage GBSV1            | DQ340064  | Clustered | VC_779_0  | N42 | 2    | Geobacillus      | Group I      | Duplodnaviria | Heunggongvinae | Urovincota    | Caudoviricetes     | n.a.         | Unclassified   | O               | O             | O             |
| S7_vs_38834  | Exiguobacterium phage vB_EauS-123  | KU160495  | Clustered | VC_779_0  | N30 | 5    | Exiguobacterium  | Group I      | Duplodnaviria | Heunggongvinae | Urovincota    | Caudoviricetes     | n.a.         | Unclassified   | O               | O             | O             |
| S7_vs_41098  | Faecalibacterium phage FP_oengus   | MG711463  | Clustered | VC_1085_1 | N20 | 65   | Faecalibacterium | Group I      | Duplodnaviria | Heunggongvinae | Urovincota    | Caudoviricetes     | n.a.         | Unclassified   | O               | O             | O             |
| S7_vs_41534  | Clostridium phage HM2              | LT600745  | Clustered | VC_1265_0 | N19 | 4    | Clostridium      | Group I      | Duplodnaviria | Heunggongvinae | Urovincota    | Caudoviricetes     | n.a.         | Salasmaviridae | O               | O             | O             |
| S7_vs_42563  | n.a.                               | n.a.      | Clustered | VC_1291_0 | A   | n.a. | n.a.             | n.a.         | n.a.          | n.a.           | n.a.          | n.a.               | n.a.         | n.a.           | n.a.            | n.a.          | n.a.          |
| S7_vs_47050  | Butyrivibrio virus Anian           | MN882551  | Clustered | VC_720_0  | N1  | 32   | Butyrivibrio     | Group I      | Duplodnaviria | Heunggongvinae | Urovincota    | Caudoviricetes     | n.a.         | Unclassified   | O               | O             | O             |
| S7_vs_48523  | Streptococcus phage MileyG         | OL749657  | Clustered | VC_152_0  | N34 | 2    | Streptococcus    | Group I      | Duplodnaviria | Heunggongvinae | Urovincota    | Caudoviricetes     | n.a.         | Unclassified   | O               | O             | O             |
| S7_vs_48708  | Clostridium phage Clo-PEP-1        | KY240687  | Clustered | VC_442_0  | N3  | 25   | Clostridium      | Group I      | Duplodnaviria | Heunggongvinae | Urovincota    | Caudoviricetes     | n.a.         | Unclassified   | O               | O             | O             |
| S7_vs_48832  | Bacteriophage sp.                  | LT1996078 | Clustered | VC_278_0  | N14 | 5    | Unspecified      | Unclassified | Unclassified  | n.a.           | n.a.          | n.a.               | n.a.         | n.a.           | n.a.            | n.a.          | n.a.          |
| S7_vs_49426  | Erysipelothrix phage SE-1          | KR816341  | Clustered | VC_1149_0 | N3  | 11   | Erysipelothrix   | Group I      | Duplodnaviria | Heunggongvinae | Urovincota    | Caudoviricetes     | n.a.         | Unclassified   | O               | O             | O             |
| S7_vs_4956   | Faecalibacterium phage FP_Epona    | MG711462  | Clustered | VC_723_0  | C13 | 52   | Faecalibacterium | Group I      | Duplodnaviria | Heunggongvinae | Urovincota    | Caudoviricetes     | n.a.         | Unclassified   | Unclassified    | Eponavirus    | Eponavirus    |
| S7_vs_50194  | n.a.                               | n.a.      | Clustered | VC_1602_0 | A   | n.a. | n.a.             | n.a.         | n.a.          | n.a.           | n.a.          | n.a.               | n.a.         | n.a.           | n.a.            | n.a.          | n.a.          |
| S7_vs_5236   | Butyrivibrio phage Idris           | MN882554  | Clustered | VC_1289_0 | N7  | 31   | Butyrivibrio     | Group I      | Duplodnaviria | Heunggongvinae | Urovincota    | Caudoviricetes     | n.a.         | Unclassified   | O               | O             | O             |
| S7_vs_55409  | Bacillus phage 1                   | DQ840344  | Clustered | VC_778_0  | N28 | 7    | Bacillus         | Group I      | Duplodnaviria | Heunggongvinae | Urovincota    | Caudoviricetes     | n.a.         | Unclassified   | O               | O             | O             |
| S7_vs_557    | Bacteriodes phage F2               | MT806187  | Clustered | VC_1505_0 | N12 | 9    | Bacteriodes      | Group I      | Duplodnaviria | Heunggongvinae | Urovincota    | Caudoviricetes     | n.a.         | Unclassified   | O               | O             | O             |
| S7_vs_56529  | Bacillus phage vB_BIS_BMBtp13      | KX1190832 | Clustered | VC_667_0  | C9  | 5    | Bacillus         | Group I      | Duplodnaviria | Heunggongvinae | Urovincota    | Caudoviricetes     | n.a.         | Unclassified   | Unclassified    | Unclassified  | Unclassified  |
| S7_vs_59465  | Clostridium phage phiMMP01         | LN681541  | Clustered | VC_151_0  | N16 | 27   | Clostridium      | Group I      | Duplodnaviria | Heunggongvinae | Urovincota    | Caudoviricetes     | n.a.         | Unclassified   | O               | O             | O             |
| S7_vs_6626   | Faecalibacterium phage FP_Epona    | MG711462  | Clustered | VC_723_0  | C13 | 49   | Faecalibacterium | Group I      | Duplodnaviria | Heunggongvinae | Urovincota    | Caudoviricetes     | n.a.         | Unclassified   | Unclassified    | Eponavirus    | Eponavirus    |
| S7_vs_69630  | Clostridium phage phiCT19406B      | KM983331  | Clustered | VC_660_0  | N8  | 10   | Clostridium      | Group I      | Duplodnaviria | Heunggongvinae | Urovincota    | Caudoviricetes     | n.a.         | Unclassified   | O               | O             | O             |
| S7_vs_73280  | Microbacterium phage Min1          | EF579802  | Clustered | VC_642_0  | C1  | 13   | Microbacterium   | Group I      | Duplodnaviria | Heunggongvinae | Urovincota    | Caudoviricetes     | n.a.         | Unclassified   | Unclassified    | Unclassified  | Unclassified  |

|              |                                       |          |           |           |     |      |                  |              |               |                |               |                    |              |                   |                  |                |
|--------------|---------------------------------------|----------|-----------|-----------|-----|------|------------------|--------------|---------------|----------------|---------------|--------------------|--------------|-------------------|------------------|----------------|
| S7_vs_82140  | Geobacillus phage GBSV1               | DQ340064 | Clustered | VC_779_0  | N41 | 2    | Geobacillus      | Group I      | Duplodnaviria | Heunggongvinae | Urovincota    | Caudoviricetes     | n.a.         | Unclassified      | O                | O              |
| S7_vs_83100  | Streptococcus phage MismyG            | OL774867 | Clustered | VC_152_0  | N17 | 5    | Streptococcus    | Group I      | Duplodnaviria | Heunggongvinae | Urovincota    | Caudoviricetes     | n.a.         | Unclassified      | O                | O              |
| S7_vs_86377  | Streptococcus phage Javan290          | MK448900 | Clustered | VC_332_0  | N27 | 2    | Streptococcus    | Group I      | Duplodnaviria | Heunggongvinae | Urovincota    | Caudoviricetes     | n.a.         | Unclassified      | O                | O              |
| S7_vs_87439  | n.a.                                  | n.a.     | Clustered | VC_1479_0 | A   | n.a. | n.a.             | n.a.         | Duplodnaviria | Heunggongvinae | Urovincota    | Caudoviricetes     | n.a.         | n.a.              | n.a.             | n.a.           |
| S7_vs_90915  | Streptococcus phage MismyG            | OL774867 | Clustered | VC_152_0  | N15 | 6    | Streptococcus    | Group I      | Duplodnaviria | Heunggongvinae | Urovincota    | Caudoviricetes     | n.a.         | Unclassified      | O                | O              |
| S7_vs_944    | n.a.                                  | n.a.     | Clustered | VC_1505_0 | A   | n.a. | n.a.             | n.a.         | Duplodnaviria | Heunggongvinae | Urovincota    | Caudoviricetes     | n.a.         | n.a.              | n.a.             | n.a.           |
| S8_vc_101283 | Faecalibacterium phage FP_Toutatis    | MG711466 | Clustered | VC_728_0  | C1  | 101  | Faecalibacterium | Group I      | Duplodnaviria | Heunggongvinae | Urovincota    | Caudoviricetes     | n.a.         | Unclassified      | Unclassified     | Toutatisvirus  |
| S8_vc_106946 | Ralstonia phage RPS21                 | MF893441 | Clustered | VC_96_0   | N3  | 7    | Ralstonia        | Group I      | Duplodnaviria | Heunggongvinae | Urovincota    | Caudoviricetes     | n.a.         | Autographiviridae | O                | O              |
| S8_vc_111790 | Egertella phage PMBT5                 | MH626557 | Clustered | VC_1421_0 | N20 | 4    | Egertella        | Group I      | Duplodnaviria | Heunggongvinae | Urovincota    | Caudoviricetes     | n.a.         | Unclassified      | O                | O              |
| S8_vc_117796 | Bacteroides phage p00                 | BK010646 | Clustered | VC_695_0  | C5  | 43   | Bacteroides      | Group I      | Duplodnaviria | Heunggongvinae | Urovincota    | Caudoviricetes     | n.a.         | Unclassified      | Unclassified     | Unclassified   |
| S8_vc_12212  | n.a.                                  | n.a.     | Clustered | VC_153_0  | A   | n.a. | n.a.             | n.a.         | Duplodnaviria | Heunggongvinae | Urovincota    | Caudoviricetes     | n.a.         | n.a.              | n.a.             | n.a.           |
| S8_vc_129423 | Leuconostoc phage I-4A                | GQ451696 | Clustered | VC_889_0  | C1  | 127  | Leuconostoc      | Group I      | Duplodnaviria | Heunggongvinae | Urovincota    | Caudoviricetes     | n.a.         | Unclassified      | McCleskeyvirinae | Unaquatrovirus |
| S8_vc_131009 | Roseburia phage Jekyll                | LR596902 | Clustered | VC_1254_2 | N26 | 1    | Roseburia        | Group I      | Duplodnaviria | Heunggongvinae | Urovincota    | Caudoviricetes     | n.a.         | Unclassified      | O                | O              |
| S8_vc_131802 | uncultured phage cr56_1               | MT774397 | Clustered | VC_519_5  | C1  | 300  | Unspecified      | Group I      | Duplodnaviria | Heunggongvinae | Urovincota    | Caudoviricetes     | Crassvirales | Suoliviridae      | Loutivirinae     | Buchavirus     |
| S8_vc_132697 | Roseburia phage Jekyll                | LR596902 | Clustered | VC_1254_0 | N19 | 10   | Roseburia        | Group I      | Duplodnaviria | Heunggongvinae | Urovincota    | Caudoviricetes     | n.a.         | Unclassified      | O                | O              |
| S8_vc_134943 | n.a.                                  | n.a.     | Clustered | VC_1564_0 | F   | n.a. | n.a.             | n.a.         | Duplodnaviria | Heunggongvinae | Urovincota    | Caudoviricetes     | n.a.         | n.a.              | n.a.             | n.a.           |
| S8_vc_136235 | Bacteriophage sp.                     | OP549880 | Clustered | VC_1549_0 | N5  | 16   | Unspecified      | Unclassified | Unclassified  | n.a.           | n.a.          | n.a.               | n.a.         | Unclassified      | O                | O              |
| S8_vc_13758  | Butyrivibrio phage Idris              | MN882554 | Clustered | VC_1477_0 | N13 | 2    | Butyrivibrio     | Group I      | Duplodnaviria | Heunggongvinae | Urovincota    | Caudoviricetes     | n.a.         | Unclassified      | O                | O              |
| S8_vc_142700 | Bacteriophage sp.                     | OP549880 | Clustered | VC_1549_0 | N5  | 17   | Unspecified      | Unclassified | Unclassified  | n.a.           | n.a.          | n.a.               | n.a.         | Unclassified      | O                | O              |
| S8_vc_147128 | Phage DP SC_6_H4_2017                 | MT121964 | Clustered | VC_1490_1 | C2  | 174  | Unspecified      | Group I      | Duplodnaviria | Heunggongvinae | Urovincota    | Caudoviricetes     | n.a.         | Unclassified      | Unclassified     | Unclassified   |
| S8_vc_151384 | Faecalibacterium phage FP_Epona       | MG711462 | Clustered | VC_723_0  | C2  | 83   | Faecalibacterium | Group I      | Duplodnaviria | Heunggongvinae | Urovincota    | Caudoviricetes     | n.a.         | Unclassified      | Unclassified     | Eponavirus     |
| S8_vc_158225 | uncultured phage cr3_1                | MT774381 | Clustered | VC_691_0  | C1  | 148  | Unspecified      | Group I      | Duplodnaviria | Heunggongvinae | Urovincota    | Caudoviricetes     | Crassvirales | Intestiviridae    | Cndevirinae      | Dorbovirus     |
| S8_vc_16172  | n.a.                                  | n.a.     | Clustered | VC_1583_0 | A   | n.a. | n.a.             | n.a.         | Duplodnaviria | Heunggongvinae | Urovincota    | Caudoviricetes     | n.a.         | n.a.              | n.a.             | n.a.           |
| S8_vc_163760 | Faecalibacterium phage FP_oengus      | MG711463 | Clustered | VC_1083_1 | N15 | 73   | Faecalibacterium | Group I      | Duplodnaviria | Heunggongvinae | Urovincota    | Caudoviricetes     | n.a.         | Unclassified      | O                | O              |
| S8_vc_166403 | n.a.                                  | n.a.     | Clustered | VC_1294_0 | A   | n.a. | n.a.             | n.a.         | Duplodnaviria | Heunggongvinae | Urovincota    | Caudoviricetes     | n.a.         | n.a.              | n.a.             | n.a.           |
| S8_vc_166677 | uncultured phage cr8_1                | MT774384 | Clustered | VC_691_1  | C1  | 191  | Unspecified      | Group I      | Duplodnaviria | Heunggongvinae | Urovincota    | Caudoviricetes     | Crassvirales | Intestiviridae    | Obtuvirinae      | Fobxhuvirus    |
| S8_vc_170430 | Clavibacter phage CMP1                | GQ241246 | Clustered | VC_880_0  | C2  | 14   | Clavibacter      | Group I      | Duplodnaviria | Heunggongvinae | Urovincota    | Caudoviricetes     | n.a.         | Unclassified      | Unclassified     | Cimpunavirus   |
| S8_vc_170878 | Faecalibacterium phage FP_Toutatis    | MG711466 | Clustered | VC_728_0  | C4  | 72   | Faecalibacterium | Group I      | Duplodnaviria | Heunggongvinae | Urovincota    | Caudoviricetes     | n.a.         | Unclassified      | Unclassified     | Toutatisvirus  |
| S8_vc_174559 | Clostridium phage HM2                 | LT600745 | Clustered | VC_1261_0 | N32 | 4    | Clostridium      | Group I      | Duplodnaviria | Heunggongvinae | Urovincota    | Caudoviricetes     | n.a.         | Salasmaviridae    | O                | O              |
| S8_vc_183045 | Bacteroides phage F4                  | MT806185 | Clustered | VC_1044_0 | C1  | 94   | Bacteroides      | Group I      | Duplodnaviria | Heunggongvinae | Urovincota    | Caudoviricetes     | n.a.         | Unclassified      | Unclassified     | Unclassified   |
| S8_vc_187742 | Geobacillus virus E3                  | KP144388 | Clustered | VC_748_0  | N17 | 2    | Geobacillus      | Group I      | Duplodnaviria | Heunggongvinae | Urovincota    | Caudoviricetes     | n.a.         | Unclassified      | O                | O              |
| S8_vc_196670 | n.a.                                  | n.a.     | Clustered | VC_1258_0 | A   | n.a. | n.a.             | n.a.         | Duplodnaviria | Heunggongvinae | Urovincota    | Caudoviricetes     | n.a.         | n.a.              | n.a.             | n.a.           |
| S8_vc_197061 | Bifidobacterium phage BigBem1         | MTD06237 | Clustered | VC_579_0  | C2  | 34   | Bifidobacterium  | Group I      | Duplodnaviria | Heunggongvinae | Urovincota    | Caudoviricetes     | n.a.         | Unclassified      | Unclassified     | Unclassified   |
| S8_vc_203044 | Bacillus phage vB_BsuP-Goe1           | KU831549 | Clustered | VC_847_0  | N20 | 3    | Bacillus         | Group I      | Duplodnaviria | Heunggongvinae | Urovincota    | Caudoviricetes     | n.a.         | Salasmaviridae    | O                | O              |
| S8_vc_208102 | n.a.                                  | n.a.     | Clustered | VC_1619_0 | F   | n.a. | n.a.             | n.a.         | Duplodnaviria | Heunggongvinae | Urovincota    | Caudoviricetes     | n.a.         | n.a.              | n.a.             | n.a.           |
| S8_vc_208107 | n.a.                                  | n.a.     | Clustered | VC_1619_0 | F   | n.a. | n.a.             | n.a.         | Duplodnaviria | Heunggongvinae | Urovincota    | Caudoviricetes     | n.a.         | n.a.              | n.a.             | n.a.           |
| S8_vc_208110 | Bacillus phage vB_BcoS-136            | MH884508 | Clustered | VC_491_0  | N19 | 3    | Bacillus         | Group I      | Duplodnaviria | Heunggongvinae | Urovincota    | Caudoviricetes     | n.a.         | Unclassified      | O                | O              |
| S8_vc_208119 | Gokushovirus WZ-2015a                 | KT264793 | Clustered | VC_1170_0 | C1  | 27   | Unspecified      | Group II     | Monodnaviria  | Sangervirine   | Phixiviricota | Malgrandaviricetes | Pettivirales | Microviridae      | Gokushovirinae   | Gokushovirus   |
| S8_vc_208120 | Phage vB_RanS_PJN03                   | ON245412 | Clustered | VC_951_1  | N14 | 12   | Unspecified      | Group I      | Duplodnaviria | Heunggongvinae | Urovincota    | Caudoviricetes     | n.a.         | Unclassified      | O                | O              |
| S8_vc_208126 | Clostridium phage phiMMP01            | LN681541 | Clustered | VC_151_0  | N19 | 27   | Clostridium      | Group I      | Duplodnaviria | Heunggongvinae | Urovincota    | Caudoviricetes     | n.a.         | Unclassified      | O                | O              |
| S8_vc_208146 | Human gut gokushovirus                | KX513867 | Clustered | VC_1184_0 | C1  | 28   | Unspecified      | Group II     | Monodnaviria  | Sangervirine   | Phixiviricota | Malgrandaviricetes | Pettivirales | Microviridae      | Gokushovirinae   | Unclassified   |
| S8_vc_41376  | Faecalibacterium phage FP_oengus      | MG711463 | Clustered | VC_1083_1 | N21 | 59   | Faecalibacterium | Group I      | Duplodnaviria | Heunggongvinae | Urovincota    | Caudoviricetes     | n.a.         | Unclassified      | O                | O              |
| S8_vc_43483  | n.a.                                  | n.a.     | Clustered | VC_1607_0 | F   | n.a. | n.a.             | n.a.         | Duplodnaviria | Heunggongvinae | Urovincota    | Caudoviricetes     | n.a.         | n.a.              | n.a.             | n.a.           |
| S8_vc_45776  | Lactococcus phage 62605               | MF448565 | Clustered | VC_210_0  | C1  | 141  | Lactococcus      | Group I      | Duplodnaviria | Heunggongvinae | Urovincota    | Caudoviricetes     | n.a.         | Unclassified      | Unclassified     | Skunavirus     |
| S8_vc_52050  | Clostridium phage HM2                 | LT600745 | Clustered | VC_1258_0 | N38 | 4    | Clostridium      | Group I      | Duplodnaviria | Heunggongvinae | Urovincota    | Caudoviricetes     | n.a.         | Salasmaviridae    | O                | O              |
| S8_vc_55476  | n.a.                                  | n.a.     | Clustered | VC_1481_1 | A   | n.a. | n.a.             | n.a.         | Duplodnaviria | Heunggongvinae | Urovincota    | Caudoviricetes     | n.a.         | n.a.              | n.a.             | n.a.           |
| S8_vc_71214  | Arthrobacter phage Orcanus            | MT952853 | Clustered | VC_1511_0 | N3  | 1    | Arthrobacter     | Group I      | Duplodnaviria | Heunggongvinae | Urovincota    | Caudoviricetes     | n.a.         | Unclassified      | O                | O              |
| S8_vc_72773  | Faecalibacterium phage FP_Lagaffe     | MG711461 | Clustered | VC_1291_0 | N40 | 3    | Faecalibacterium | Group I      | Duplodnaviria | Heunggongvinae | Urovincota    | Caudoviricetes     | n.a.         | Unclassified      | O                | O              |
| S8_vc_79769  | n.a.                                  | n.a.     | Clustered | VC_1561_0 | A   | n.a. | n.a.             | n.a.         | Duplodnaviria | Heunggongvinae | Urovincota    | Caudoviricetes     | n.a.         | n.a.              | n.a.             | n.a.           |
| S8_vc_87755  | Crassphage sp. C0521BD4               | MW067000 | Clustered | VC_691_0  | C2  | 168  | Unspecified      | Group I      | Duplodnaviria | Heunggongvinae | Urovincota    | Caudoviricetes     | Crassvirales | Unclassified      | Unclassified     | Unclassified   |
| S8_vc_93976  | n.a.                                  | n.a.     | Clustered | VC_1570_0 | A   | n.a. | n.a.             | n.a.         | Monodnaviria  | Sangervirine   | Phixiviricota | Malgrandaviricetes | Pettivirales | Microviridae      | Unclassified     | Unclassified   |
| S8_vc_94361  | Microviridae sp.                      | MG945227 | Clustered | VC_1145_0 | C1  | 20   | Unspecified      | Group II     | Monodnaviria  | Sangervirine   | Phixiviricota | Malgrandaviricetes | Pettivirales | Microviridae      | Unclassified     | Unclassified   |
| S8_vs_125717 | n.a.                                  | n.a.     | Clustered | VC_1274_0 | A   | n.a. | n.a.             | n.a.         | Duplodnaviria | Heunggongvinae | Urovincota    | Caudoviricetes     | n.a.         | n.a.              | n.a.             | n.a.           |
| S8_vs_132359 | n.a.                                  | n.a.     | Clustered | VC_1618_0 | F   | n.a. | n.a.             | n.a.         | Duplodnaviria | Heunggongvinae | Urovincota    | Caudoviricetes     | n.a.         | n.a.              | n.a.             | n.a.           |
| S8_vs_134805 | Faecalibacterium phage FP_Mushu       | MG711460 | Clustered | VC_1288_0 | C1  | 147  | Faecalibacterium | Group I      | Duplodnaviria | Heunggongvinae | Urovincota    | Caudoviricetes     | n.a.         | Unclassified      | Unclassified     | Mushuvirus     |
| S8_vs_136922 | Clostridium phage phiCTP1             | HM159599 | Clustered | VC_921_0  | N7  | 4    | Clostridium      | Group I      | Duplodnaviria | Heunggongvinae | Urovincota    | Caudoviricetes     | n.a.         | Unclassified      | O                | O              |
| S8_vs_142097 | n.a.                                  | n.a.     | Clustered | VC_1258_0 | A   | n.a. | n.a.             | n.a.         | Duplodnaviria | Heunggongvinae | Urovincota    | Caudoviricetes     | n.a.         | n.a.              | n.a.             | n.a.           |
| S8_vs_143608 | Streptococcus phage Javan261          | MK448720 | Clustered | VC_778_0  | N20 | 6    | Streptococcus    | Group I      | Duplodnaviria | Heunggongvinae | Urovincota    | Caudoviricetes     | n.a.         | Unclassified      | O                | O              |
| S8_vs_145173 | Faecalibacterium phage FP_Tamnis      | MG711467 | Clustered | VC_1290_0 | N36 | 2    | Faecalibacterium | Group I      | Duplodnaviria | Heunggongvinae | Urovincota    | Caudoviricetes     | n.a.         | Unclassified      | O                | O              |
| S8_vs_148389 | Bacteroides phage F2                  | MT806186 | Clustered | VC_1507_0 | N4  | 4    | Bacteroides      | Group I      | Duplodnaviria | Heunggongvinae | Urovincota    | Caudoviricetes     | n.a.         | Unclassified      | O                | O              |
| S8_vs_149700 | Streptococcus phage Javan630          | MK448997 | Clustered | VC_649_3  | N2  | 71   | Streptococcus    | Group I      | Duplodnaviria | Heunggongvinae | Urovincota    | Caudoviricetes     | n.a.         | Unclassified      | O                | O              |
| S8_vs_154231 | n.a.                                  | n.a.     | Clustered | VC_779_0  | A   | n.a. | n.a.             | n.a.         | Duplodnaviria | Heunggongvinae | Urovincota    | Caudoviricetes     | n.a.         | n.a.              | n.a.             | n.a.           |
| S8_vs_162053 | Clostridium phage HM2                 | LT600745 | Clustered | VC_1258_0 | N38 | 4    | Clostridium      | Group I      | Duplodnaviria | Heunggongvinae | Urovincota    | Caudoviricetes     | n.a.         | Salasmaviridae    | O                | O              |
| S8_vs_175255 | Bacillus phage vB_Bis_BMBtp13         | KX130832 | Clustered | VC_667_0  | C10 | 7    | Bacillus         | Group I      | Duplodnaviria | Heunggongvinae | Urovincota    | Caudoviricetes     | n.a.         | Unclassified      | Unclassified     | Unclassified   |
| S8_vs_176604 | n.a.                                  | n.a.     | Clustered | VC_1231_0 | A   | n.a. | n.a.             | n.a.         | Duplodnaviria | Heunggongvinae | Urovincota    | Caudoviricetes     | n.a.         | n.a.              | n.a.             | n.a.           |
| S8_vs_176720 | Bacillus phage vB_Bis_BMBtp13         | KX130832 | Clustered | VC_667_0  | C7  | 9    | Bacillus         | Group I      | Duplodnaviria | Heunggongvinae | Urovincota    | Caudoviricetes     | n.a.         | Unclassified      | Unclassified     | Unclassified   |
| S8_vs_179208 | n.a.                                  | n.a.     | Clustered | VC_1612_1 | A   | n.a. | n.a.             | n.a.         | Duplodnaviria | Heunggongvinae | Urovincota    | Caudoviricetes     | n.a.         | n.a.              | n.a.             | n.a.           |
| S8_vs_182288 | Cellulophaga phage phi17-2            | KC821609 | Clustered | VC_1055_1 | N8  | 4    | Cellulophaga     | Group I      | Duplodnaviria | Heunggongvinae | Urovincota    | Caudoviricetes     | n.a.         | Unclassified      | O                | O              |
| S8_vs_182331 | Clostridium phage phiMMP04            | JX145342 | Clustered | VC_649_0  | N2  | 4    | Clostridium      | Group I      | Duplodnaviria | Heunggongvinae | Urovincota    | Caudoviricetes     | n.a.         | Unclassified      | O                | O              |
| S8_vs_193843 | n.a.                                  | n.a.     | Clustered | VC_1566_0 | A   | n.a. | n.a.             | n.a.         | Duplodnaviria | Heunggongvinae | Urovincota    | Caudoviricetes     | n.a.         | n.a.              | n.a.             | n.a.           |
| S8_vs_204260 | n.a.                                  | n.a.     | Clustered | VC_1291_0 | A   | n.a. | n.a.             | n.a.         | Duplodnaviria | Heunggongvinae | Urovincota    | Caudoviricetes     | n.a.         | n.a.              | n.a.             | n.a.           |
| S8_vs_205257 | n.a.                                  | n.a.     | Clustered | VC_1291_0 | A   | n.a. | n.a.             | n.a.         | Duplodnaviria | Heunggongvinae | Urovincota    | Caudoviricetes     | n.a.         | n.a.              | n.a.             | n.a.           |
| S8_vs_206526 | Roseburia phage Shimadzu              | LR596903 | Clustered | VC_727_0  | C1  | 214  | Roseburia        | Group I      | Duplodnaviria | Heunggongvinae | Urovincota    | Caudoviricetes     | n.a.         | Unclassified      | Unclassified     | Unclassified   |
| S8_vs_208103 | Bacteroides phage SJC03               | MT074146 | Clustered | VC_963_0  | N5  | 35   | Bacteroides      | Group I      | Duplodnaviria | Heunggongvinae | Urovincota    | Caudoviricetes     | n.a.         | Unclassified      | O                | O              |
| S8_vs_208113 | n.a.                                  | n.a.     | Clustered | VC_1291_0 | A   | n.a. | n.a.             | n.a.         | Duplodnaviria | Heunggongvinae | Urovincota    | Caudoviricetes     | n.a.         | n.a.              | n.a.             | n.a.           |
| S8_vs_208114 | Psychrobacter phage pOW20-A           | JP974295 | Clustered | VC_439_0  | N3  | 2    | Psychrobacter    | Group I      | Duplodnaviria | Heunggongvinae | Urovincota    | Caudoviricetes     | n.a.         | Unclassified      | O                | O              |
| S8_vs_208118 | Streptococcus phage MismyG            | OL774867 | Clustered | VC_152_0  | N15 | 4    | Streptococcus    | Group I      | Duplodnaviria | Heunggongvinae | Urovincota    | Caudoviricetes     | n.a.         | Unclassified      | O                | O              |
| S8_vs_208129 | Bdellovibrio phage phi1402            | VC344709 | Clustered | VC_967_0  | C4  | 37   | Bdellovibrio     | Group I      | Duplodnaviria | Heunggongvinae | Urovincota    | Caudoviricetes     | n.a.         | Unclassified      | Unclassified     | Unclassified   |
| S8_vs_28311  | Flavobacterium phage vB_FspS_laban6-1 | MN812211 | Clustered | VC_1062_0 | N5  | 8    | Flavobacterium   | Group I      | Duplodnaviria | Heunggongvinae | Urovincota    | Caudoviricetes     | n.a.         | Duncervidae       | O                | O              |
| S8_vs_4153   | n.a.                                  | n.a.     | Clustered | VC_1507_0 | A   | n.a. | n.a.             | n.a.         | Duplodnaviria | Heunggongvinae | Urovincota    | Caudoviricetes     | n.a.         | n.a.              | n.a.             | n.a.           |
| S8_vs_47265  | Faecalibacterium phage FP_Epona       | MG711462 | Clustered | VC_723_0  | C5  | 81   | Faecalibacterium | Group I      | Duplodnaviria | Heunggongvinae | Urovincota    | Caudoviricetes     | n.a.         | Unclassified      | Unc              |                |



|                                      |                                     |           |                     |           |     |      |                  |              |               |               |                |                   |               |                |              |              |              |
|--------------------------------------|-------------------------------------|-----------|---------------------|-----------|-----|------|------------------|--------------|---------------|---------------|----------------|-------------------|---------------|----------------|--------------|--------------|--------------|
| S8_vs_50431                          | n.a.                                | n.a.      | Clustered           | VC_1567_0 | A   | n.a. | n.a.             | n.a.         | n.a.          | n.a.          | n.a.           | n.a.              | n.a.          | n.a.           | n.a.         | n.a.         | n.a.         |
| S8_vs_5211                           | n.a.                                | n.a.      | Clustered           | VC_1611_0 | A   | n.a. | n.a.             | n.a.         | n.a.          | n.a.          | n.a.           | n.a.              | n.a.          | n.a.           | n.a.         | n.a.         | n.a.         |
| S8_vs_71212                          | n.a.                                | n.a.      | Clustered           | VC_1479_0 | A   | n.a. | n.a.             | n.a.         | n.a.          | n.a.          | n.a.           | n.a.              | n.a.          | n.a.           | n.a.         | n.a.         | n.a.         |
| S8_vs_76852                          | Streptococcus phage Javan261        | MK448720  | Clustered           | VC_724_0  | N30 | 2    | Streptococcus    | Group I      | Duplodnaviria | Heunggongvine | Uroviricota    | Caudoviricetes    | n.a.          | Unclassified   | O            | O            | O            |
| S8_vs_9114                           | n.a.                                | n.a.      | Clustered           | VC_1576_0 | A   | n.a. | n.a.             | n.a.         | n.a.          | n.a.          | n.a.           | n.a.              | n.a.          | n.a.           | n.a.         | n.a.         | n.a.         |
| S8_vs_99362                          | Bacteroides phage p00               | BK010646  | Clustered           | VC_695_0  | C5  | 45   | Bacteroides      | Group I      | Duplodnaviria | Heunggongvine | Uroviricota    | Caudoviricetes    | n.a.          | Unclassified   | Unclassified | Unclassified | Unclassified |
| S8_vs_9987                           | Phage vB_RanS_PJN03                 | ON245412  | Clustered           | VC_951_0  | N14 | 7    | Unspecified      | Group I      | Duplodnaviria | Heunggongvine | Uroviricota    | Caudoviricetes    | n.a.          | Unclassified   | O            | O            | O            |
| S9_vf_15012                          | Streptococcus phage Javan372        | MK448920  | Clustered           | VC_344_0  | C1  | 124  | Streptococcus    | Group I      | Duplodnaviria | Heunggongvine | Uroviricota    | Caudoviricetes    | n.a.          | Unclassified   | Unclassified | Unclassified | Unclassified |
| S9_vf_22901                          | Tortoise microvirus 13              | MKT65563  | Clustered           | VC_1299_0 | C1  | 26   | Unspecified      | Group II     | Monodnaviria  | Sangervine    | Phixviricota   | Malgandaviricetes | Petitvirinae  | Microviridae   | Unclassified | Unclassified | Unclassified |
| S9_vf_26805                          | Microviridae sp.                    | MG3945488 | Clustered           | VC_1334_0 | C1  | 20   | Unspecified      | Group II     | Monodnaviria  | Sangervine    | Phixviricota   | Malgandaviricetes | Petitvirinae  | Microviridae   | Unclassified | Unclassified | Unclassified |
| S9_vf_34736                          | Clostridium phage HM2               | LT600745  | Clustered           | VC_1261_0 | N28 | 8    | Clostridium      | Group I      | Duplodnaviria | Heunggongvine | Uroviricota    | Caudoviricetes    | n.a.          | Salasmaviridae | O            | O            | O            |
| S9_vf_4115                           | Streptococcus phage Javan318        | MK448905  | Clustered           | VC_425_0  | C1  | 98   | Streptococcus    | Group I      | Duplodnaviria | Heunggongvine | Uroviricota    | Caudoviricetes    | n.a.          | Unclassified   | Unclassified | Unclassified | Unclassified |
| S9_vf_51656                          | uncultured phage cr8_1              | MT774384  | Clustered           | VC_691_1  | C1  | 246  | Unspecified      | Group I      | Duplodnaviria | Heunggongvine | Uroviricota    | Caudoviricetes    | Crassvirales  | Intestiviidae  | Obtuvirinae  | Fobxhuvirins | Fobxhuvirins |
| S9_vf_64844                          | Faecalibacterium phage FP_Lagaffe   | MG711461  | Clustered           | VC_727_0  | C4  | 104  | Faecalibacterium | Group I      | Duplodnaviria | Heunggongvine | Uroviricota    | Caudoviricetes    | n.a.          | Unclassified   | Unclassified | Lagaffevirus | Lagaffevirus |
| S9_vf_70236                          | n.a.                                | n.a.      | Clustered           | VC_1288_0 | A   | n.a. | n.a.             | n.a.         | n.a.          | n.a.          | n.a.           | n.a.              | n.a.          | n.a.           | n.a.         | n.a.         | n.a.         |
| S9_vf_73311                          | Exiguobacterium phage vB_EauM-23    | MH844558  | Clustered           | VC_145_0  | C2  | 22   | Exiguobacterium  | Group I      | Duplodnaviria | Heunggongvine | Uroviricota    | Caudoviricetes    | n.a.          | Unclassified   | Unclassified | Unclassified | Unclassified |
| S9_vf_75363                          | n.a.                                | n.a.      | Clustered           | VC_1258_0 | A   | n.a. | n.a.             | n.a.         | n.a.          | n.a.          | n.a.           | n.a.              | n.a.          | n.a.           | n.a.         | n.a.         | n.a.         |
| S9_vf_76769                          | uncultured phage cr52_1             | MT774395  | Clustered           | VC_519_6  | C1  | 199  | Unspecified      | Group I      | Duplodnaviria | Heunggongvine | Uroviricota    | Caudoviricetes    | Crassvirales  | Suoliviridae   | Loutivirinae | Buchavirus   | Buchavirus   |
| S9_vf_79919                          | n.a.                                | n.a.      | Clustered           | VC_779_0  | A   | n.a. | n.a.             | n.a.         | n.a.          | n.a.          | n.a.           | n.a.              | n.a.          | n.a.           | n.a.         | n.a.         | n.a.         |
| S9_vf_90852                          | hiovirus sp.                        | MT135289  | Clustered           | VC_1492_0 | C1  | 31   | Unspecified      | Group II     | Monodnaviria  | Loebvinae     | Holmeiviricota | Faserviricetes    | Tubulavirinae | hioviridae     | Unclassified | hiovirus     | hiovirus     |
| S9_vf_90866                          | Streptococcus phage phiZJ20091101-2 | KX077893  | Clustered           | VC_1229_0 | C1  | 16   | Streptococcus    | Unclassified | n.a.          | n.a.          | n.a.           | n.a.              | Unclassified  | Unclassified   | Unclassified | Unclassified | Unclassified |
| S9_vf_90871                          | Clostridium phage phiMMP01          | LN681541  | Clustered           | VC_150_0  | N16 | 10   | Clostridium      | Group I      | Duplodnaviria | Heunggongvine | Uroviricota    | Caudoviricetes    | n.a.          | Unclassified   | O            | O            | O            |
| S9_vs_1966                           | Streptococcus phage Javan290        | MK448900  | Clustered           | VC_332_0  | N19 | 3    | Streptococcus    | Group I      | Duplodnaviria | Heunggongvine | Uroviricota    | Caudoviricetes    | n.a.          | Unclassified   | O            | O            | O            |
| S9_vs_21850                          | Bacteroides phage p00               | BK010646  | Clustered           | VC_695_0  | C4  | 42   | Bacteroides      | Group I      | Duplodnaviria | Heunggongvine | Uroviricota    | Caudoviricetes    | n.a.          | Unclassified   | Unclassified | Unclassified | Unclassified |
| S9_vs_26179                          | n.a.                                | n.a.      | Clustered           | VC_782_0  | A   | n.a. | n.a.             | n.a.         | n.a.          | n.a.          | n.a.           | n.a.              | n.a.          | n.a.           | n.a.         | n.a.         | n.a.         |
| S9_vs_27813                          | Faecalibacterium phage FP_Epona     | MG711462  | Clustered           | VC_723_0  | C13 | 52   | Faecalibacterium | Group I      | Duplodnaviria | Heunggongvine | Uroviricota    | Caudoviricetes    | n.a.          | Unclassified   | Unclassified | Eponavirus   | Eponavirus   |
| S9_vs_28197                          | Bacteroides phage F4                | MT806185  | Clustered           | VC_1505_0 | N7  | 7    | Bacteroides      | Group I      | Duplodnaviria | Heunggongvine | Uroviricota    | Caudoviricetes    | n.a.          | Unclassified   | O            | O            | O            |
| S9_vs_32588                          | Faecalibacterium phage FP_oengus    | MG711463  | Clustered           | VC_1085_1 | N16 | 70   | Faecalibacterium | Group I      | Duplodnaviria | Heunggongvine | Uroviricota    | Caudoviricetes    | n.a.          | Unclassified   | O            | O            | O            |
| S9_vs_34898                          | Lactococcus phage CAP               | MZ308445  | Clustered           | VC_278_0  | N12 | 9    | Lactococcus      | Group I      | Duplodnaviria | Heunggongvine | Uroviricota    | Caudoviricetes    | n.a.          | Unclassified   | O            | O            | O            |
| S9_vs_4343                           | n.a.                                | n.a.      | Clustered           | VC_1291_0 | A   | n.a. | n.a.             | n.a.         | n.a.          | n.a.          | n.a.           | n.a.              | n.a.          | n.a.           | n.a.         | n.a.         | n.a.         |
| S9_vs_4558                           | Faecalibacterium phage FP_oengus    | MG711463  | Clustered           | VC_1085_1 | N18 | 68   | Faecalibacterium | Group I      | Duplodnaviria | Heunggongvine | Uroviricota    | Caudoviricetes    | n.a.          | Unclassified   | O            | O            | O            |
| S9_vs_45812                          | Bacillus phage vB_Bis_BMbp13        | KX130832  | Clustered           | VC_667_0  | C7  | 7    | Bacillus         | Group I      | Duplodnaviria | Heunggongvine | Uroviricota    | Caudoviricetes    | n.a.          | Unclassified   | Unclassified | Unclassified | Unclassified |
| S9_vs_46498                          | Geobacillus phage GBSV1             | DQ340064  | Clustered           | VC_779_0  | N29 | 4    | Geobacillus      | Group I      | Duplodnaviria | Heunggongvine | Uroviricota    | Caudoviricetes    | n.a.          | Unclassified   | O            | O            | O            |
| S9_vs_48424                          | n.a.                                | n.a.      | Clustered           | VC_1565_0 | A   | n.a. | n.a.             | n.a.         | n.a.          | n.a.          | n.a.           | n.a.              | n.a.          | n.a.           | n.a.         | n.a.         | n.a.         |
| S9_vs_56354                          | Faecalibacterium phage FP_Epona     | MG711462  | Clustered           | VC_723_0  | C13 | 56   | Faecalibacterium | Group I      | Duplodnaviria | Heunggongvine | Uroviricota    | Caudoviricetes    | n.a.          | Unclassified   | Unclassified | Eponavirus   | Eponavirus   |
| S9_vs_5676                           | Streptococcus phage Javan261        | MK448720  | Clustered           | VC_724_0  | N45 | 1    | Streptococcus    | Group I      | Duplodnaviria | Heunggongvine | Uroviricota    | Caudoviricetes    | n.a.          | Unclassified   | O            | O            | O            |
| S9_vs_58402                          | n.a.                                | n.a.      | Clustered           | VC_1613_0 | A   | n.a. | n.a.             | n.a.         | n.a.          | n.a.          | n.a.           | n.a.              | n.a.          | n.a.           | n.a.         | n.a.         | n.a.         |
| S9_vs_63485                          | n.a.                                | n.a.      | Clustered           | VC_1604_0 | A   | n.a. | n.a.             | n.a.         | n.a.          | n.a.          | n.a.           | n.a.              | n.a.          | n.a.           | n.a.         | n.a.         | n.a.         |
| S9_vs_73764                          | Geobacillus phage GBSV1             | DQ340064  | Clustered           | VC_778_0  | N36 | 7    | Geobacillus      | Group I      | Duplodnaviria | Heunggongvine | Uroviricota    | Caudoviricetes    | n.a.          | Unclassified   | O            | O            | O            |
| S9_vs_75050                          | Geobacillus phage GBSV1             | DQ340064  | Clustered           | VC_778_0  | N20 | 9    | Geobacillus      | Group I      | Duplodnaviria | Heunggongvine | Uroviricota    | Caudoviricetes    | n.a.          | Unclassified   | O            | O            | O            |
| S9_vs_75200                          | n.a.                                | n.a.      | Clustered           | VC_1607_0 | F   | n.a. | n.a.             | n.a.         | n.a.          | n.a.          | n.a.           | n.a.              | n.a.          | n.a.           | n.a.         | n.a.         | n.a.         |
| S9_vs_7881                           | Clostridium phage phiMMP01          | LN681541  | Clustered           | VC_151_0  | N12 | 27   | Clostridium      | Group I      | Duplodnaviria | Heunggongvine | Uroviricota    | Caudoviricetes    | n.a.          | Unclassified   | O            | O            | O            |
| S9_vs_83108                          | n.a.                                | n.a.      | Clustered           | VC_1560_0 | A   | n.a. | n.a.             | n.a.         | n.a.          | n.a.          | n.a.           | n.a.              | n.a.          | n.a.           | n.a.         | n.a.         | n.a.         |
| S9_vs_84046                          | Butyrivibrio phage Ildris           | MN882554  | Clustered           | VC_724_0  | N27 | 4    | Butyrivibrio     | Group I      | Duplodnaviria | Heunggongvine | Uroviricota    | Caudoviricetes    | n.a.          | Unclassified   | O            | O            | O            |
| S9_vs_90849                          | n.a.                                | n.a.      | Clustered           | VC_1291_0 | A   | n.a. | n.a.             | n.a.         | n.a.          | n.a.          | n.a.           | n.a.              | n.a.          | n.a.           | n.a.         | n.a.         | n.a.         |
| S9_vs_90851                          | Clostridium phage phiMMP01          | LN681541  | Clustered           | VC_151_0  | N21 | 23   | Clostridium      | Group I      | Duplodnaviria | Heunggongvine | Uroviricota    | Caudoviricetes    | n.a.          | Unclassified   | O            | O            | O            |
| S9_vs_90857                          | n.a.                                | n.a.      | Clustered           | VC_1479_0 | A   | n.a. | n.a.             | n.a.         | n.a.          | n.a.          | n.a.           | n.a.              | n.a.          | n.a.           | n.a.         | n.a.         | n.a.         |
| S9_vs_90860                          | Butyrivibrio phage Ildris           | MN882554  | Clustered           | VC_724_0  | N36 | 4    | Butyrivibrio     | Group I      | Duplodnaviria | Heunggongvine | Uroviricota    | Caudoviricetes    | n.a.          | Unclassified   | O            | O            | O            |
| S9_vs_90863                          | n.a.                                | n.a.      | Clustered           | VC_1603_0 | F   | n.a. | n.a.             | n.a.         | n.a.          | n.a.          | n.a.           | n.a.              | n.a.          | n.a.           | n.a.         | n.a.         | n.a.         |
| S10_vf_120738                        | n.a.                                | n.a.      | Clustered/Singleton | VC_491_3  | A   | n.a. | n.a.             | n.a.         | n.a.          | n.a.          | n.a.           | n.a.              | n.a.          | n.a.           | n.a.         | n.a.         | n.a.         |
| S10_vf_43964                         | Bacteroides phage LoVEphage         | MW660583  | Clustered/Singleton | VC_1525_2 | N5  | 14   | Bacteroides      | Group I      | Duplodnaviria | Heunggongvine | Uroviricota    | Caudoviricetes    | n.a.          | Unclassified   | O            | O            | O            |
| S10_vs_37379                         | n.a.                                | n.a.      | Clustered/Singleton | VC_1055_2 | A   | n.a. | n.a.             | n.a.         | n.a.          | n.a.          | n.a.           | n.a.              | n.a.          | n.a.           | n.a.         | n.a.         | n.a.         |
| S10_vs_62776                         | Bacteroides phage LoVEphage         | MW660583  | Clustered/Singleton | VC_1525_0 | N2  | 32   | Bacteroides      | Group I      | Duplodnaviria | Heunggongvine | Uroviricota    | Caudoviricetes    | n.a.          | Unclassified   | O            | O            | O            |
| S10_vs_77004                         | n.a.                                | n.a.      | Clustered/Singleton | VC_922_0  | A   | n.a. | n.a.             | n.a.         | n.a.          | n.a.          | n.a.           | n.a.              | n.a.          | n.a.           | n.a.         | n.a.         | n.a.         |
| S11_vf_104033                        | Bacteroides phage SJC03             | MT074146  | Clustered/Singleton | VC_963_1  | N4  | 51   | Bacteroides      | Group I      | Duplodnaviria | Heunggongvine | Uroviricota    | Caudoviricetes    | n.a.          | Unclassified   | O            | O            | O            |
| S11_vf_13790                         | Geobacillus virus E3                | KP144388  | Clustered/Singleton | VC_490_0  | N9  | 1    | Geobacillus      | Group I      | Duplodnaviria | Heunggongvine | Uroviricota    | Caudoviricetes    | n.a.          | Unclassified   | O            | O            | O            |
| S11_vf_70015                         | Phage vB_RanS_PJN03                 | ON245412  | Clustered/Singleton | VC_951_2  | N20 | 7    | Unspecified      | Group I      | Duplodnaviria | Heunggongvine | Uroviricota    | Caudoviricetes    | n.a.          | Unclassified   | O            | O            | O            |
| S11_vs_75554                         | n.a.                                | n.a.      | Clustered/Singleton | VC_1264_0 | A   | n.a. | n.a.             | n.a.         | n.a.          | n.a.          | n.a.           | n.a.              | n.a.          | n.a.           | n.a.         | n.a.         | n.a.         |
| S12_vf_188819                        | Clostridium phage c-st              | AP008983  | Clustered/Singleton | VC_490_3  | N7  | 5    | Clostridium      | Group I      | Duplodnaviria | Heunggongvine | Uroviricota    | Caudoviricetes    | n.a.          | Unclassified   | O            | O            | O            |
| S12_vf_67909                         | Enterococcus phage EF1              | MF001358  | Clustered/Singleton | VC_221_0  | N2  | 11   | Enterococcus     | Group I      | Duplodnaviria | Heunggongvine | Uroviricota    | Caudoviricetes    | n.a.          | Unclassified   | O            | O            | O            |
| S12_vs_123620                        | n.a.                                | n.a.      | Clustered/Singleton | VC_1295_0 | A   | n.a. | n.a.             | n.a.         | n.a.          | n.a.          | n.a.           | n.a.              | n.a.          | n.a.           | n.a.         | n.a.         | n.a.         |
| S12_vs_172579                        | n.a.                                | n.a.      | Clustered/Singleton | VC_1477_1 | A   | n.a. | n.a.             | n.a.         | n.a.          | n.a.          | n.a.           | n.a.              | n.a.          | n.a.           | n.a.         | n.a.         | n.a.         |
| S13_vf_38708                         | n.a.                                | n.a.      | Clustered/Singleton | VC_1292_0 | A   | n.a. | n.a.             | n.a.         | n.a.          | n.a.          | n.a.           | n.a.              | n.a.          | n.a.           | n.a.         | n.a.         | n.a.         |
| S13_vf_4901                          | Bacillus phage vB_BcoS-136          | MH884508  | Clustered/Singleton | VC_491_1  | N10 | 2    | Bacillus         | Group I      | Duplodnaviria | Heunggongvine | Uroviricota    | Caudoviricetes    | n.a.          | Unclassified   | O            | O            | O            |
| S13_vs_26756                         | n.a.                                | n.a.      | Clustered/Singleton | VC_1295_1 | A   | n.a. | n.a.             | n.a.         | n.a.          | n.a.          | n.a.           | n.a.              | n.a.          | n.a.           | n.a.         | n.a.         | n.a.         |
| S14_vs_70985                         | n.a.                                | n.a.      | Clustered/Singleton | VC_1612_2 | A   | n.a. | n.a.             | n.a.         | n.a.          | n.a.          | n.a.           | n.a.              | n.a.          | n.a.           | n.a.         | n.a.         | n.a.         |
| S14_vs_74067                         | n.a.                                | n.a.      | Clustered/Singleton | VC_1582_2 | A   | n.a. | n.a.             | n.a.         | n.a.          | n.a.          | n.a.           | n.a.              | n.a.          | n.a.           | n.a.         | n.a.         | n.a.         |
| S15_vf_75924                         | uncultured phage cr116_1            | MT774389  | Clustered/Singleton | VC_1079_0 | N6  | 6    | Unspecified      | Group I      | Duplodnaviria | Heunggongvine | Uroviricota    | Caudoviricetes    | Crassvirales  | Steigviridae   | O            | O            | O            |
| S15_vs_42043                         | n.a.                                | n.a.      | Clustered/Singleton | VC_1592_2 | A   | n.a. | n.a.             | n.a.         | n.a.          | n.a.          | n.a.           | n.a.              | n.a.          | n.a.           | n.a.         | n.a.         | n.a.         |
| S15_vf_108554                        | n.a.                                | n.a.      | Clustered/Singleton | VC_1554_1 | A   | n.a. | n.a.             | n.a.         | n.a.          | n.a.          | n.a.           | n.a.              | n.a.          | n.a.           | n.a.         | n.a.         | n.a.         |
| S16_vf_173009                        | n.a.                                | n.a.      | Clustered/Singleton | VC_1586_0 | A   | n.a. | n.a.             | n.a.         | n.a.          | n.a.          | n.a.           | n.a.              | n.a.          | n.a.           | n.a.         | n.a.         | n.a.         |
| S16_vf_96483                         | n.a.                                | n.a.      | Clustered/Singleton | VC_1557_0 | A   | n.a. | n.a.             | n.a.         | n.a.          | n.a.          | n.a.           | n.a.              | n.a.          | n.a.           | n.a.         | n.a.         | n.a.         |
| S16_vs_15093                         | Butyrivibrio virus Ceridwen         | MN882553  | Clustered/Singleton | VC_1434_0 | N12 | 8    | Butyrivibrio     | Group I      | Duplodnaviria | Heunggongvine | Uroviricota    | Caudoviricetes    | n.a.          | Unclassified   | O            | O            | O            |
| S16_vs_34751                         | n.a.                                | n.a.      | Clustered/Singleton | VC_780_0  | A   | n.a. | n.a.             | n.a.         | n.a.          | n.a.          | n.a.           | n.a.              | n.a.          | n.a.           | n.a.         | n.a.         | n.a.         |
| S3_vf_108959                         | n.a.                                | n.a.      | Clustered/Singleton | VC_1254_3 | A   | n.a. | n.a.             | n.a.         | n.a.          | n.a.          | n.a.           | n.a.              | n.a.          | n.a.           | n.a.         | n.a.         | n.a.         |
| S3_vf_61860                          | Clostridium phage vB_CpeS-1181      | MW478292  | Clustered/Singleton | VC_923_1  | N2  | 21   | Clostridium      | Group I      | Duplodnaviria | Heunggongvine | Uroviricota    | Caudoviricetes    | n.a.          | Unclassified   | O            | O            | O            |
| S3_vs_16825                          | Roseburia phage Jekyll              | LR506902  | Clustered/Singleton | VC_1254_4 | N19 | 10   | Roseburia        | Group I      | Duplodnaviria | Heunggongvine | Uroviricota    | Caudoviricetes    | n.a.          | Unclassified   | O            | O            | O            |
| S3_vs_39774                          | n.a.                                | n.a.      | Clustered/Singleton | VC_1582_1 | A   | n.a. | n.a.             | n.a.         | n.a.          | n.a.          | n.a.           | n.a.              | n.a.          | n.a.           | n.a.         | n.a.         | n.a.         |
| S3_vs_68031                          | Faecalibacterium phage FP_oengus    | MG711463  | Clustered/Singleton | VC_1242_0 | N2  | 101  | Faecalibacterium | Group I      | Duplodnaviria | Heunggongvine | Uroviricota    | Caudoviricetes    | n.a.          | Unclassified   | O            | O            | O            |
| S3_vs_81793                          | n.a.                                | n.a.      | Clustered/Singleton | VC_1586_1 | A   | n.a. | n.a.             | n.a.         | n.a.          | n.a.          | n.a.           | n.a.              | n.a.          | n.a.           | n.a.         | n.a.         | n.a.         |
| S4_vf_31973                          | n.a.                                | n.a.      | Clustered/Singleton | VC_490_2  | A   | n.a. | n.a.             | n.a.         | n.a.          | n.a.          | n.a.           | n.a.              | n.a.          | n.a.           | n.a.         | n.a.         | n.a.         |
| S4_vs_VIRSorcer_31975-circular-cat_1 | Phage vB_RanS_PJN03                 | ON245412  | Clustered/Singleton | VC_948_1  | N24 | 3    | Unspecified      | Group I      | Duplodnaviria | Heunggongvine | Uroviricota    | Caudoviricetes    | n.a.          | Unclassified   | O            | O            | O            |

|               |                                    |          |                     |           |     |      |                   |              |               |               |            |                |              |              |              |      |
|---------------|------------------------------------|----------|---------------------|-----------|-----|------|-------------------|--------------|---------------|---------------|------------|----------------|--------------|--------------|--------------|------|
| S5_vf_145579  | uncultured phage cr85_1            | MT774390 | Clustered/Singleton | VC_1079_2 | N6  | 12   | Unspecified       | Group I      | Duplodnaviria | Heunggongvine | Urovincota | Caudoviricetes | Crassvirales | Steigviridae | O            | O    |
| S5_vf_67622   | IAS virus                          | KJ003983 | Clustered/Singleton | VC_1079_1 | N6  | 11   | Unspecified       | Group I      | Duplodnaviria | Heunggongvine | Urovincota | Caudoviricetes | Crassvirales | Steigviridae | O            | O    |
| S5_vs_109527  | n.a.                               | n.a.     | Clustered/Singleton | VC_1612_3 | A   | n.a. | n.a.              | n.a.         | n.a.          | n.a.          | n.a.       | n.a.           | n.a.         | n.a.         | n.a.         | n.a. |
| S5_vs_122344  | Roseburia phage Jekyll             | LR859602 | Clustered/Singleton | VC_728_1  | C2  | 7    | Roseburia         | Group I      | Duplodnaviria | Heunggongvine | Urovincota | Caudoviricetes | n.a.         | Unclassified | Unclassified | O    |
| S5_vs_124677  | Faecalibacterium phage FP_Toutatis | MG711466 | Clustered/Singleton | VC_728_1  | C3  | 63   | Faecalibacterium  | Group I      | Duplodnaviria | Heunggongvine | Urovincota | Caudoviricetes | n.a.         | Unclassified | Unclassified | O    |
| S5_vs_131510  | Bacteroides phage p00              | BK010646 | Clustered/Singleton | VC_695_1  | C1  | 71   | Bacteroides       | Group I      | Duplodnaviria | Heunggongvine | Urovincota | Caudoviricetes | n.a.         | Unclassified | Unclassified | O    |
| S5_vs_77593   | Clostridium phage phiMMP01         | LN881541 | Clustered/Singleton | VC_151_1  | N22 | 16   | Clostridium       | Group I      | Duplodnaviria | Heunggongvine | Urovincota | Caudoviricetes | n.a.         | Unclassified | O            | O    |
| S5_vs_97574   | Clostridium phage c-st             | AP008983 | Clustered/Singleton | VC_219_1  | N8  | 13   | Clostridium       | Group I      | Duplodnaviria | Heunggongvine | Urovincota | Caudoviricetes | n.a.         | Unclassified | O            | O    |
| S6_vs_29152   | Faecalibacterium phage FP_Brigit   | MG711465 | Clustered/Singleton | VC_923_2  | N16 | 5    | Faecalibacterium  | Group I      | Duplodnaviria | Heunggongvine | Urovincota | Caudoviricetes | n.a.         | Unclassified | O            | O    |
| S7_vf_37279   | Bacteroides phage LoVEphage        | MW60583  | Clustered/Singleton | VC_1525_1 | N6  | 15   | Bacteroides       | Group I      | Duplodnaviria | Heunggongvine | Urovincota | Caudoviricetes | n.a.         | Unclassified | O            | O    |
| S7_vs_103530  | n.a.                               | n.a.     | Clustered/Singleton | VC_1554_2 | A   | n.a. | n.a.              | n.a.         | n.a.          | n.a.          | n.a.       | n.a.           | n.a.         | n.a.         | n.a.         | n.a. |
| S7_vs_135679  | n.a.                               | n.a.     | Clustered/Singleton | VC_1594_0 | A   | n.a. | n.a.              | n.a.         | n.a.          | n.a.          | n.a.       | n.a.           | n.a.         | n.a.         | n.a.         | n.a. |
| S7_vs_137611  | Brevibacillus phage Sundance       | KT151959 | Clustered/Singleton | VC_219_2  | N20 | 1    | Brevibacillus     | Group I      | Duplodnaviria | Heunggongvine | Urovincota | Caudoviricetes | n.a.         | Unclassified | O            | O    |
| S7_vs_54322   | n.a.                               | n.a.     | Clustered/Singleton | VC_1565_1 | A   | n.a. | n.a.              | n.a.         | n.a.          | n.a.          | n.a.       | n.a.           | n.a.         | n.a.         | n.a.         | n.a. |
| S7_vs_78507   | n.a.                               | n.a.     | Clustered/Singleton | VC_1481_2 | A   | n.a. | n.a.              | n.a.         | n.a.          | n.a.          | n.a.       | n.a.           | n.a.         | n.a.         | n.a.         | n.a. |
| S8_vf_11794   | Bacillus phage vB_BcoS-136         | MH884508 | Clustered/Singleton | VC_491_2  | N17 | 3    | Bacillus          | Group I      | Duplodnaviria | Heunggongvine | Urovincota | Caudoviricetes | n.a.         | Unclassified | O            | O    |
| S8_vf_161703  | Bacillus phage vB_BsuS_P1N02       | OM634653 | Clustered/Singleton | VC_1040_1 | N9  | 8    | Bacillus          | Group I      | Duplodnaviria | Heunggongvine | Urovincota | Caudoviricetes | n.a.         | Unclassified | O            | O    |
| S8_vf_173225  | Geobacillus virus E3               | KP144388 | Clustered/Singleton | VC_90_1   | N10 | 3    | Geobacillus       | Group I      | Duplodnaviria | Heunggongvine | Urovincota | Caudoviricetes | n.a.         | Unclassified | O            | O    |
| S8_vf_23955   | Faecalibacterium phage FP_oengus   | MG711463 | Clustered/Singleton | VC_1085_2 | N21 | 60   | Faecalibacterium  | Group I      | Duplodnaviria | Heunggongvine | Urovincota | Caudoviricetes | n.a.         | Unclassified | O            | O    |
| S8_vf_54514   | Butyrivibrio virus Cenidwen        | MN825554 | Clustered/Singleton | VC_1554_5 | N61 | 5    | Butyrivibrio      | Group I      | Duplodnaviria | Heunggongvine | Urovincota | Caudoviricetes | n.a.         | Unclassified | O            | O    |
| S8_vs_115958  | Streptococcus phage Javan630       | MK448997 | Clustered/Singleton | VC_649_4  | C9  | 43   | Streptococcus     | Group I      | Duplodnaviria | Heunggongvine | Urovincota | Caudoviricetes | n.a.         | Unclassified | Unclassified | O    |
| S8_vs_59736   | Clostridium phage c-st             | AP008983 | Clustered/Singleton | VC_219_3  | N7  | 16   | Clostridium       | Group I      | Duplodnaviria | Heunggongvine | Urovincota | Caudoviricetes | n.a.         | Unclassified | O            | O    |
| S9_vf_13507   | n.a.                               | n.a.     | Clustered/Singleton | VC_1592_3 | A   | n.a. | n.a.              | n.a.         | n.a.          | n.a.          | n.a.       | n.a.           | n.a.         | n.a.         | n.a.         | n.a. |
| S9_vf_57277   | n.a.                               | n.a.     | Clustered/Singleton | VC_1554_4 | A   | n.a. | n.a.              | n.a.         | n.a.          | n.a.          | n.a.       | n.a.           | n.a.         | n.a.         | n.a.         | n.a. |
| S9_vf_90847   | Enterococcus phage EF1             | MF001358 | Clustered/Singleton | VC_221_1  | N2  | 25   | Enterococcus      | Group I      | Duplodnaviria | Heunggongvine | Urovincota | Caudoviricetes | n.a.         | Unclassified | O            | O    |
| S9_vs_10424   | n.a.                               | n.a.     | Clustered/Singleton | VC_1421_1 | A   | n.a. | n.a.              | n.a.         | n.a.          | n.a.          | n.a.       | n.a.           | n.a.         | n.a.         | n.a.         | n.a. |
| S9_vs_50439   | n.a.                               | n.a.     | Clustered/Singleton | VC_1554_3 | A   | n.a. | n.a.              | n.a.         | n.a.          | n.a.          | n.a.       | n.a.           | n.a.         | n.a.         | n.a.         | n.a. |
| S9_vs_90727   | Streptococcus phage Javan630       | MK448997 | Clustered/Singleton | VC_649_5  | C5  | 55   | Streptococcus     | Group I      | Duplodnaviria | Heunggongvine | Urovincota | Caudoviricetes | n.a.         | Unclassified | Unclassified | O    |
| S9_vs_90846   | Faecalibacterium phage FP_Lugh     | MG711464 | Clustered/Singleton | VC_640_0  | N5  | 19   | Faecalibacterium  | Group I      | Duplodnaviria | Heunggongvine | Urovincota | Caudoviricetes | n.a.         | Unclassified | O            | O    |
| S9_vs_90859   | Bacteriophage sp.                  | LT990678 | Clustered/Singleton | VC_278_1  | N17 | 4    | Unspecified       | Unclassified | n.a.          | n.a.          | n.a.       | n.a.           | n.a.         | Unclassified | O            | O    |
| S10_vf_47170  | n.a.                               | n.a.     | Outlier             | n.a.      | F   | n.a. | n.a.              | n.a.         | n.a.          | n.a.          | n.a.       | n.a.           | n.a.         | n.a.         | n.a.         | n.a. |
| S10_vf_62230  | Streptococcus phage Javan576       | MK448987 | Outlier             | n.a.      | N1  | 17   | Streptococcus     | Group I      | Duplodnaviria | Heunggongvine | Urovincota | Caudoviricetes | n.a.         | Unclassified | O            | O    |
| S10_vs_106834 | Riemerella phage vB_RusS_PT03      | MZ995504 | Outlier             | n.a.      | N4  | 11   | Riemerella        | Group I      | Duplodnaviria | Heunggongvine | Urovincota | Caudoviricetes | n.a.         | Unclassified | O            | O    |
| S10_vs_37694  | Cellulophaga phage Ingeline_1      | M7733435 | Outlier             | n.a.      | N4  | 7    | Cellulophaga      | Group I      | Duplodnaviria | Heunggongvine | Urovincota | Caudoviricetes | n.a.         | Dumetviridae | O            | O    |
| S11_vf_33433  | Tenacibaculum phage Gundel_1       | M7732474 | Outlier             | n.a.      | N1  | 11   | Tenacibaculum     | Group I      | Duplodnaviria | Heunggongvine | Urovincota | Caudoviricetes | n.a.         | Pachyviridae | O            | O    |
| S11_vf_99751  | n.a.                               | n.a.     | Outlier             | n.a.      | A   | n.a. | n.a.              | n.a.         | n.a.          | n.a.          | n.a.       | n.a.           | n.a.         | n.a.         | n.a.         | n.a. |
| S11_vs_20225  | Faecalibacterium phage FP_Lugh     | MG711464 | Outlier             | n.a.      | N2  | 8    | Faecalibacterium  | Group I      | Duplodnaviria | Heunggongvine | Urovincota | Caudoviricetes | n.a.         | Unclassified | O            | O    |
| S11_vs_48109  | Streptococcus phage Javan630       | MK448997 | Outlier             | n.a.      | N9  | 26   | Streptococcus     | Group I      | Duplodnaviria | Heunggongvine | Urovincota | Caudoviricetes | n.a.         | Unclassified | O            | O    |
| S11_vs_53675  | n.a.                               | n.a.     | Outlier             | n.a.      | A   | n.a. | n.a.              | n.a.         | n.a.          | n.a.          | n.a.       | n.a.           | n.a.         | n.a.         | n.a.         | n.a. |
| S11_vs_55144  | n.a.                               | n.a.     | Outlier             | n.a.      | A   | n.a. | n.a.              | n.a.         | n.a.          | n.a.          | n.a.       | n.a.           | n.a.         | n.a.         | n.a.         | n.a. |
| S11_vs_56762  | n.a.                               | n.a.     | Outlier             | n.a.      | A   | n.a. | n.a.              | n.a.         | n.a.          | n.a.          | n.a.       | n.a.           | n.a.         | n.a.         | n.a.         | n.a. |
| S11_vs_67573  | n.a.                               | n.a.     | Outlier             | n.a.      | A   | n.a. | n.a.              | n.a.         | n.a.          | n.a.          | n.a.       | n.a.           | n.a.         | n.a.         | n.a.         | n.a. |
| S11_vs_68348  | Streptococcus phage IPPI10         | KY065452 | Outlier             | n.a.      | N3  | 19   | Streptococcus     | Group I      | Duplodnaviria | Heunggongvine | Urovincota | Caudoviricetes | n.a.         | Unclassified | O            | O    |
| S11_vs_6878   | Clostridium phage phiCT9441A       | KM983329 | Outlier             | n.a.      | N3  | 14   | Clostridium       | Group I      | Duplodnaviria | Heunggongvine | Urovincota | Caudoviricetes | n.a.         | Unclassified | O            | O    |
| S11_vs_98851  | n.a.                               | n.a.     | Outlier             | n.a.      | A   | n.a. | n.a.              | n.a.         | n.a.          | n.a.          | n.a.       | n.a.           | n.a.         | n.a.         | n.a.         | n.a. |
| S11_vs_82331  | Klebsiella phage ST11-0XA245phi3.2 | MKA16010 | Outlier             | n.a.      | N1  | 18   | Klebsiella        | Group I      | Duplodnaviria | Heunggongvine | Urovincota | Caudoviricetes | n.a.         | Unclassified | O            | O    |
| S11_vs_89911  | n.a.                               | n.a.     | Outlier             | n.a.      | A   | n.a. | n.a.              | n.a.         | n.a.          | n.a.          | n.a.       | n.a.           | n.a.         | n.a.         | n.a.         | n.a. |
| S12_vf_105542 | Streptococcus phage SF39           | OK173051 | Outlier             | n.a.      | N3  | 3    | Streptococcus     | Group I      | Duplodnaviria | Heunggongvine | Urovincota | Caudoviricetes | n.a.         | Unclassified | O            | O    |
| S12_vf_18902  | Bacillus phage PK-3                | QN881243 | Outlier             | n.a.      | N14 | 11   | Bacillus          | Group I      | Duplodnaviria | Heunggongvine | Urovincota | Caudoviricetes | n.a.         | Unclassified | O            | O    |
| S12_vs_118154 | Butyrivibrio phage Idris           | MN882554 | Outlier             | n.a.      | N20 | 4    | Butyrivibrio      | Group I      | Duplodnaviria | Heunggongvine | Urovincota | Caudoviricetes | n.a.         | Unclassified | O            | O    |
| S12_vs_133070 | Bacillus phage BUCT082             | MZ996646 | Outlier             | n.a.      | N4  | 8    | Bacillus          | Group I      | Duplodnaviria | Heunggongvine | Urovincota | Caudoviricetes | n.a.         | Unclassified | O            | O    |
| S12_vs_142625 | Elizabethkingia phage TCUEAP2      | OK632025 | Outlier             | n.a.      | N2  | 17   | Elizabethkingia   | Group I      | Duplodnaviria | Heunggongvine | Urovincota | Caudoviricetes | n.a.         | Unclassified | O            | O    |
| S12_vs_14467  | n.a.                               | n.a.     | Outlier             | n.a.      | A   | n.a. | n.a.              | n.a.         | n.a.          | n.a.          | n.a.       | n.a.           | n.a.         | n.a.         | n.a.         | n.a. |
| S12_vs_153780 | Acidithiobacillus phage AcaML1     | JXS07079 | Outlier             | n.a.      | N1  | 25   | Acidithiobacillus | Group I      | Duplodnaviria | Heunggongvine | Urovincota | Caudoviricetes | n.a.         | Unclassified | O            | O    |
| S12_vs_188825 | n.a.                               | n.a.     | Outlier             | n.a.      | A   | n.a. | n.a.              | n.a.         | n.a.          | n.a.          | n.a.       | n.a.           | n.a.         | n.a.         | n.a.         | n.a. |
| S12_vs_1980   | Elizabethkingia phage TCUEAP2      | OK632025 | Outlier             | n.a.      | N7  | 25   | Elizabethkingia   | Group I      | Duplodnaviria | Heunggongvine | Urovincota | Caudoviricetes | n.a.         | Unclassified | O            | O    |
| S12_vs_22853  | Streptococcus phage SM1            | AY007505 | Outlier             | n.a.      | N2  | 24   | Streptococcus     | Group I      | Duplodnaviria | Heunggongvine | Urovincota | Caudoviricetes | n.a.         | Unclassified | O            | O    |
| S12_vs_28661  | n.a.                               | n.a.     | Outlier             | n.a.      | A   | n.a. | n.a.              | n.a.         | n.a.          | n.a.          | n.a.       | n.a.           | n.a.         | n.a.         | n.a.         | n.a. |
| S12_vs_32669  | n.a.                               | n.a.     | Outlier             | n.a.      | A   | n.a. | n.a.              | n.a.         | n.a.          | n.a.          | n.a.       | n.a.           | n.a.         | n.a.         | n.a.         | n.a. |
| S12_vs_74280  | n.a.                               | n.a.     | Outlier             | n.a.      | A   | n.a. | n.a.              | n.a.         | n.a.          | n.a.          | n.a.       | n.a.           | n.a.         | n.a.         | n.a.         | n.a. |
| S12_vs_75098  | Lactobacillus phage c5             | EU340421 | Outlier             | n.a.      | N5  | 6    | Lactobacillus     | Group I      | Duplodnaviria | Heunggongvine | Urovincota | Caudoviricetes | n.a.         | Unclassified | O            | O    |
| S12_vs_81729  | Bacillus phage vB_Bis_BMBtp13      | KX190832 | Outlier             | n.a.      | N9  | 4    | Bacillus          | Group I      | Duplodnaviria | Heunggongvine | Urovincota | Caudoviricetes | n.a.         | Unclassified | O            | O    |
| S12_vs_8204   | Bacillus phage G                   | JN638751 | Outlier             | n.a.      | N15 | 4    | Bacillus          | Group I      | Duplodnaviria | Heunggongvine | Urovincota | Caudoviricetes | n.a.         | Unclassified | O            | O    |
| S12_vs_87088  | Faecalibacterium phage FP_Lugh     | MG711464 | Outlier             | n.a.      | N1  | 32   | Faecalibacterium  | Group I      | Duplodnaviria | Heunggongvine | Urovincota | Caudoviricetes | n.a.         | Unclassified | O            | O    |
| S12_vs_94042  | n.a.                               | n.a.     | Outlier             | n.a.      | A   | n.a. | n.a.              | n.a.         | n.a.          | n.a.          | n.a.       | n.a.           | n.a.         | n.a.         | n.a.         | n.a. |
| S12_vs_99219  | n.a.                               | n.a.     | Outlier             | n.a.      | A   | n.a. | n.a.              | n.a.         | n.a.          | n.a.          | n.a.       | n.a.           | n.a.         | n.a.         | n.a.         | n.a. |
| S13_vf_147396 | n.a.                               | n.a.     | Outlier             | n.a.      | A   | n.a. | n.a.              | n.a.         | n.a.          | n.a.          | n.a.       | n.a.           | n.a.         | n.a.         | n.a.         | n.a. |
| S13_vf_1770   | Pectobacterium phage DU_PP_III     | MF979562 | Outlier             | n.a.      | N2  | 13   | Pectobacterium    | Group I      | Duplodnaviria | Heunggongvine | Urovincota | Caudoviricetes | n.a.         | Unclassified | O            | O    |
| S13_vf_54201  | Faecalibacterium phage FP_Brigit   | MG711465 | Outlier             | n.a.      | N1  | 18   | Faecalibacterium  | Group I      | Duplodnaviria | Heunggongvine | Urovincota | Caudoviricetes | n.a.         | Unclassified | O            | O    |
| S13_vf_66508  | Bacteroides phage ARB14            | MT074134 | Outlier             | n.a.      | N1  | 51   | Bacteroides       | Group I      | Duplodnaviria | Heunggongvine | Urovincota | Caudoviricetes | n.a.         | Unclassified | O            | O    |
| S13_vs_114213 | Faecalibacterium phage FP_Mushu    | MG711460 | Outlier             | n.a.      | N4  | 4    | Faecalibacterium  | Group I      | Duplodnaviria | Heunggongvine | Urovincota | Caudoviricetes | n.a.         | Unclassified | O            | O    |
| S13_vs_13129  | Bacillus phage vB_Bis_BMBtp13      | KX190832 | Outlier             | n.a.      | N22 | 2    | Bacillus          | Group I      | Duplodnaviria | Heunggongvine | Urovincota | Caudoviricetes | n.a.         | Unclassified | O            | O    |
| S13_vs_14794  | Aeromonas phage P5                 | OM519319 | Outlier             | n.a.      | N1  | 2    | Aeromonas         | Group I      | Duplodnaviria | Heunggongvine | Urovincota | Caudoviricetes | n.a.         | Unclassified | O            | O    |
| S13_vs_27462  | Streptococcus phage Dp-1           | HQ268735 | Outlier             | n.a.      | N1  | 35   | Streptococcus     | Group I      | Duplodnaviria | Heunggongvine | Urovincota | Caudoviricetes | n.a.         | Unclassified | O            | O    |
| S13_vs_45488  | Curvibacter phage TJ1              | MHF66655 | Outlier             | n.a.      | N1  | 13   | Curvibacter       | Group I      | Duplodnaviria | Heunggongvine | Urovincota | Caudoviricetes | n.a.         | Unclassified | O            | O    |
| S13_vs_57267  | Prevotella phage Lak-C1            | MK250029 | Outlier             | n.a.      | N1  | 4    | Prevotella        | Group I      | Duplodnaviria | Heunggongvine | Urovincota | Caudoviricetes | n.a.         | Unclassified | O            | O    |
| S14_vf_117147 | Bacillus phage B13                 | OP066531 | Outlier             | n.a.      | N15 | 6    | Bacillus          | Group I      | Duplodnaviria | Heunggongvine | Urovincota | Caudoviricetes | n.a.         | Unclassified | O            | O    |
| S14_vf_51134  | Streptococcus phage OIsA2          | OL774869 | Outlier             | n.a.      | N5  | 22   | Streptococcus     | Group I      | Duplodnaviria | Heunggongvine | Urovincota | Caudoviricetes | n.a.         | Unclassified | O            | O    |
| S14_vf_57689  | Microbacterium phage Rasputia      | MDF59646 | Outlier             | n.a.      | N1  | 17   | Microbacterium    | Group I      | Duplodnaviria | Heunggongvine | Urovincota | Caudoviricetes | n.a.         | Unclassified | O            | O    |
| S14_vs_100227 | Streptococcus phage phiARK0746     | KT337365 | Outlier             | n.a.      | N8  | 12   | Streptococcus     | Group I      | Duplodnaviria | Heunggongvine | Urovincota | Caudoviricetes | n.a.         | Unclassified | O            | O    |
| S14_vs_101482 | n.a.                               | n.a.     | Outlier             | n.a.      | A   | n.a. | n.a.              | n.a.         | n.a.          | n.a.          | n.a.       | n.a.           | n.a.         | n.a.         | n.a.         | n.a. |
| S14_vs_108376 | Clostridium phage phiCT453A        | KM983327 | Outlier             | n.a.      | N5  | 10   | Clostridium       | Group I      | Duplodnaviria | Heunggongvine | Urovincota | Caudoviricetes | n.a.         | Unclassified | O            | O    |

|                                     |                                       |           |         |      |     |      |                   |          |               |                |              |                    |              |               |      |      |      |
|-------------------------------------|---------------------------------------|-----------|---------|------|-----|------|-------------------|----------|---------------|----------------|--------------|--------------------|--------------|---------------|------|------|------|
| S14_vs_112345                       | n.a.                                  | n.a.      | Outlier | n.a. | A   | n.a. | n.a.              | n.a.     | n.a.          | n.a.           | n.a.         | n.a.               | n.a.         | n.a.          | n.a. | n.a. | n.a. |
| S14_vs_115377                       | Roseburia phage Jekyll                | LR596902  | Outlier | n.a. | N13 | 9    | Roseburia         | Group I  | Duplodnaviria | Heunggongvinae | Uroviricota  | Caudoviricetes     | n.a.         | Unclassified  | O    | O    | O    |
| S14_vs_115455                       | Clostridium phage phiSM101            | CP000315  | Outlier | n.a. | N2  | 16   | Clostridium       | Group I  | Duplodnaviria | Heunggongvinae | Uroviricota  | Caudoviricetes     | n.a.         | Unclassified  | O    | O    | O    |
| S14_vs_20193                        | Faecalibacterium phage FP_Lagaffe     | MK711461  | Outlier | n.a. | N2  | 50   | Faecalibacterium  | Group I  | Duplodnaviria | Heunggongvinae | Uroviricota  | Caudoviricetes     | n.a.         | Unclassified  | O    | O    | O    |
| S14_vs_26320                        | Geobacillus virus E3                  | KP144388  | Outlier | n.a. | N16 | 4    | Geobacillus       | Group I  | Duplodnaviria | Heunggongvinae | Uroviricota  | Caudoviricetes     | n.a.         | Unclassified  | O    | O    | O    |
| S14_vs_30108                        | n.a.                                  | n.a.      | Outlier | n.a. | A   | n.a. | n.a.              | n.a.     | n.a.          | n.a.           | n.a.         | n.a.               | n.a.         | n.a.          | n.a. | n.a. | n.a. |
| S14_vs_30566                        | Streptococcus phage phiARI0746        | KT337365  | Outlier | n.a. | N3  | 11   | Streptococcus     | Group I  | Duplodnaviria | Heunggongvinae | Uroviricota  | Caudoviricetes     | n.a.         | Unclassified  | O    | O    | O    |
| S14_vs_30905                        | n.a.                                  | n.a.      | Outlier | n.a. | A   | n.a. | n.a.              | n.a.     | n.a.          | n.a.           | n.a.         | n.a.               | n.a.         | n.a.          | n.a. | n.a. | n.a. |
| S14_vs_3162                         | Streptococcus phage Javan242          | MKA48882  | Outlier | n.a. | N11 | 14   | Streptococcus     | Group I  | Duplodnaviria | Heunggongvinae | Uroviricota  | Caudoviricetes     | n.a.         | Unclassified  | O    | O    | O    |
| S14_vs_39565                        | Streptococcus phage Javan422          | MKA48934  | Outlier | n.a. | N7  | 6    | Streptococcus     | Group I  | Duplodnaviria | Heunggongvinae | Uroviricota  | Caudoviricetes     | n.a.         | Unclassified  | O    | O    | O    |
| S14_vs_96286                        | Streptococcus phage Javan583          | MKA48814  | Outlier | n.a. | N6  | 21   | Streptococcus     | Group I  | Duplodnaviria | Heunggongvinae | Uroviricota  | Caudoviricetes     | n.a.         | Unclassified  | O    | O    | O    |
| S15_vf_58467                        | Enterococcus phage 9183               | MTY939241 | Outlier | n.a. | N1  | 11   | Enterococcus      | Group I  | Duplodnaviria | Heunggongvinae | Uroviricota  | Caudoviricetes     | n.a.         | Unclassified  | O    | O    | O    |
| S16_vf_172897                       | Bifidobacterium phage BigBem1         | MT006237  | Outlier | n.a. | N6  | 9    | Bifidobacterium   | Group I  | Duplodnaviria | Heunggongvinae | Uroviricota  | Caudoviricetes     | n.a.         | Unclassified  | O    | O    | O    |
| S16_vf_32359                        | n.a.                                  | n.a.      | Outlier | n.a. | A   | n.a. | n.a.              | n.a.     | n.a.          | n.a.           | n.a.         | n.a.               | n.a.         | n.a.          | n.a. | n.a. | n.a. |
| S16_vf_33218                        | Lactococcus phage CHPC965             | MN689525  | Outlier | n.a. | N1  | 62   | Lactococcus       | Group I  | Duplodnaviria | Heunggongvinae | Uroviricota  | Caudoviricetes     | n.a.         | Unclassified  | O    | O    | O    |
| S16_vf_9270                         | n.a.                                  | n.a.      | Outlier | n.a. | A   | n.a. | n.a.              | n.a.     | n.a.          | n.a.           | n.a.         | n.a.               | n.a.         | n.a.          | n.a. | n.a. | n.a. |
| S16_vs_10622                        | n.a.                                  | n.a.      | Outlier | n.a. | A   | n.a. | n.a.              | n.a.     | n.a.          | n.a.           | n.a.         | n.a.               | n.a.         | n.a.          | n.a. | n.a. | n.a. |
| S16_vs_120149                       | n.a.                                  | n.a.      | Outlier | n.a. | A   | n.a. | n.a.              | n.a.     | n.a.          | n.a.           | n.a.         | n.a.               | n.a.         | n.a.          | n.a. | n.a. | n.a. |
| S16_vs_137222                       | Faecalibacterium phage FP_Lagaffe     | MG711461  | Outlier | n.a. | N3  | 48   | Faecalibacterium  | Group I  | Duplodnaviria | Heunggongvinae | Uroviricota  | Caudoviricetes     | n.a.         | Unclassified  | O    | O    | O    |
| S16_vs_141213                       | n.a.                                  | n.a.      | Outlier | n.a. | A   | n.a. | n.a.              | n.a.     | n.a.          | n.a.           | n.a.         | n.a.               | n.a.         | n.a.          | n.a. | n.a. | n.a. |
| S16_vs_165662                       | Clostridium phage HM T                | KU517658  | Outlier | n.a. | N8  | 2    | Clostridium       | Group I  | Duplodnaviria | Heunggongvinae | Uroviricota  | Caudoviricetes     | n.a.         | Unclassified  | O    | O    | O    |
| S16_vs_18293                        | Streptococcus phage Javan261          | MKA48720  | Outlier | n.a. | N4  | 12   | Streptococcus     | Group I  | Duplodnaviria | Heunggongvinae | Uroviricota  | Caudoviricetes     | n.a.         | Unclassified  | O    | O    | O    |
| S16_vs_34021                        | n.a.                                  | n.a.      | Outlier | n.a. | A   | n.a. | n.a.              | n.a.     | n.a.          | n.a.           | n.a.         | n.a.               | n.a.         | n.a.          | n.a. | n.a. | n.a. |
| S16_vs_35031                        | n.a.                                  | n.a.      | Outlier | n.a. | A   | n.a. | n.a.              | n.a.     | n.a.          | n.a.           | n.a.         | n.a.               | n.a.         | n.a.          | n.a. | n.a. | n.a. |
| S16_vs_38863                        | Clostridium phage phiMMP01            | LN681541  | Outlier | n.a. | N9  | 19   | Clostridium       | Group I  | Duplodnaviria | Heunggongvinae | Uroviricota  | Caudoviricetes     | n.a.         | Unclassified  | O    | O    | O    |
| S16_vs_54250                        | n.a.                                  | n.a.      | Outlier | n.a. | A   | n.a. | n.a.              | n.a.     | n.a.          | n.a.           | n.a.         | n.a.               | n.a.         | n.a.          | n.a. | n.a. | n.a. |
| S16_vs_81805                        | Faecalibacterium phage FP_Lugh        | MG711464  | Outlier | n.a. | N3  | 19   | Faecalibacterium  | Group I  | Duplodnaviria | Heunggongvinae | Uroviricota  | Caudoviricetes     | n.a.         | Unclassified  | O    | O    | O    |
| S17_vf_111931                       | Clostridium phage DCP1                | OP256049  | Outlier | n.a. | N1  | 10   | Clostridium       | Group I  | Duplodnaviria | Heunggongvinae | Uroviricota  | Caudoviricetes     | n.a.         | Guelinviridae | O    | O    | O    |
| S17_vf_46388                        | Ruminococcus phage phiRg507T2_3       | MTY980837 | Outlier | n.a. | N6  | 4    | Ruminococcus      | Group I  | Duplodnaviria | Heunggongvinae | Uroviricota  | Caudoviricetes     | n.a.         | Unclassified  | O    | O    | O    |
| S17_vs_110666                       | Faecalibacterium phage FP_Brigit      | MG711466  | Outlier | n.a. | N2  | 29   | Faecalibacterium  | Group I  | Duplodnaviria | Heunggongvinae | Uroviricota  | Caudoviricetes     | n.a.         | Unclassified  | O    | O    | O    |
| S17_vs_117507                       | n.a.                                  | n.a.      | Outlier | n.a. | A   | n.a. | n.a.              | n.a.     | n.a.          | n.a.           | n.a.         | n.a.               | n.a.         | n.a.          | n.a. | n.a. | n.a. |
| S17_vs_117202                       | Faecalibacterium phage FP_Lugh        | MG711464  | Outlier | n.a. | N15 | 9    | Faecalibacterium  | Group I  | Duplodnaviria | Heunggongvinae | Uroviricota  | Caudoviricetes     | n.a.         | Unclassified  | O    | O    | O    |
| S17_vs_117203                       | Acetobacter phage phiA01              | LC640971  | Outlier | n.a. | N1  | 26   | Acetobacter       | Group I  | Duplodnaviria | Heunggongvinae | Uroviricota  | Caudoviricetes     | n.a.         | Unclassified  | O    | O    | O    |
| S17_vs_21654                        | Streptococcus phage Javan74           | MKA49005  | Outlier | n.a. | N2  | 26   | Streptococcus     | Group I  | Duplodnaviria | Heunggongvinae | Uroviricota  | Caudoviricetes     | n.a.         | Unclassified  | O    | O    | O    |
| S17_vs_52890                        | n.a.                                  | n.a.      | Outlier | n.a. | A   | n.a. | n.a.              | n.a.     | n.a.          | n.a.           | n.a.         | n.a.               | n.a.         | n.a.          | n.a. | n.a. | n.a. |
| S1_vf_138157                        | n.a.                                  | n.a.      | Outlier | n.a. | A   | n.a. | n.a.              | n.a.     | n.a.          | n.a.           | n.a.         | n.a.               | n.a.         | n.a.          | n.a. | n.a. | n.a. |
| S1_vf_140259                        | Microviridae sp.                      | MG945534  | Outlier | n.a. | N1  | 6    | Unspecified       | Group II | Monodnaviria  | Sangervirae    | Phixviricota | Malgrandaviricetes | Petitvirales | Microviridae  | O    | O    | O    |
| S1_vf_28398                         | n.a.                                  | n.a.      | Outlier | n.a. | A   | n.a. | n.a.              | n.a.     | n.a.          | n.a.           | n.a.         | n.a.               | n.a.         | n.a.          | n.a. | n.a. | n.a. |
| S1_vs_133577                        | Faecalibacterium phage FP_Lugh        | MG711464  | Outlier | n.a. | N4  | 19   | Faecalibacterium  | Group I  | Duplodnaviria | Heunggongvinae | Uroviricota  | Caudoviricetes     | n.a.         | Unclassified  | O    | O    | O    |
| S1_vs_23682                         | Butyrivibrio virus Ceridwen           | MN882553  | Outlier | n.a. | N9  | 17   | Butyrivibrio      | Group I  | Duplodnaviria | Heunggongvinae | Uroviricota  | Caudoviricetes     | n.a.         | Unclassified  | O    | O    | O    |
| S2_vs_4368                          | Butyrivibrio phage Idris              | MN882554  | Outlier | n.a. | N9  | 1    | Butyrivibrio      | Group I  | Duplodnaviria | Heunggongvinae | Uroviricota  | Caudoviricetes     | n.a.         | Unclassified  | O    | O    | O    |
| S3_vf_101591                        | Gokushovirus WZ-2015a                 | KT264789  | Outlier | n.a. | N1  | 8    | Unspecified       | Group II | Monodnaviria  | Sangervirae    | Phixviricota | Malgrandaviricetes | Petitvirales | Microviridae  | O    | O    | O    |
| S3_vf_101611                        | Streptococcus phage Javan74           | MKA49005  | Outlier | n.a. | N3  | 14   | Streptococcus     | Group I  | Duplodnaviria | Heunggongvinae | Uroviricota  | Caudoviricetes     | n.a.         | Unclassified  | O    | O    | O    |
| S3_vf_111893                        | Streptococcus phage Javan583          | MKA48814  | Outlier | n.a. | N4  | 23   | Streptococcus     | Group I  | Duplodnaviria | Heunggongvinae | Uroviricota  | Caudoviricetes     | n.a.         | Unclassified  | O    | O    | O    |
| S3_vf_127392                        | Roseburia phage Jekyll                | LR596902  | Outlier | n.a. | N28 | 7    | Roseburia         | Group I  | Duplodnaviria | Heunggongvinae | Uroviricota  | Caudoviricetes     | n.a.         | Unclassified  | O    | O    | O    |
| S3_vf_127408                        | Bifidobacterium phage BlindBase11     | MT006235  | Outlier | n.a. | N1  | 28   | Bifidobacterium   | Group I  | Duplodnaviria | Heunggongvinae | Uroviricota  | Caudoviricetes     | n.a.         | Unclassified  | O    | O    | O    |
| S3_vf_2186                          | n.a.                                  | n.a.      | Outlier | n.a. | F   | n.a. | n.a.              | n.a.     | n.a.          | n.a.           | n.a.         | n.a.               | n.a.         | n.a.          | n.a. | n.a. | n.a. |
| S3_vf_23042                         | Lactococcus phage P656                | MN552149  | Outlier | n.a. | N1  | 50   | Lactococcus       | Group I  | Duplodnaviria | Heunggongvinae | Uroviricota  | Caudoviricetes     | n.a.         | Unclassified  | O    | O    | O    |
| S3_vf_5525                          | n.a.                                  | n.a.      | Outlier | n.a. | A   | n.a. | n.a.              | n.a.     | n.a.          | n.a.           | n.a.         | n.a.               | n.a.         | n.a.          | n.a. | n.a. | n.a. |
| S3_vf_56363                         | Clostridium phage phiCDKH01           | MN718463  | Outlier | n.a. | N1  | 26   | Clostridium       | Group I  | Duplodnaviria | Heunggongvinae | Uroviricota  | Caudoviricetes     | n.a.         | Unclassified  | O    | O    | O    |
| S3_vf_99626                         | Propionibacterium phage B3            | KX620749  | Outlier | n.a. | N2  | 11   | Propionibacterium | Group I  | Duplodnaviria | Heunggongvinae | Uroviricota  | Caudoviricetes     | n.a.         | Unclassified  | O    | O    | O    |
| S3_vs_1031                          | n.a.                                  | n.a.      | Outlier | n.a. | A   | n.a. | n.a.              | n.a.     | n.a.          | n.a.           | n.a.         | n.a.               | n.a.         | n.a.          | n.a. | n.a. | n.a. |
| S3_vs_119771                        | Faecalibacterium phage FP_Lugh        | MG711464  | Outlier | n.a. | N2  | 17   | Faecalibacterium  | Group I  | Duplodnaviria | Heunggongvinae | Uroviricota  | Caudoviricetes     | n.a.         | Unclassified  | O    | O    | O    |
| S3_vs_122706                        | Streptococcus phage phiARI0746        | KT337365  | Outlier | n.a. | N6  | 2    | Streptococcus     | Group I  | Duplodnaviria | Heunggongvinae | Uroviricota  | Caudoviricetes     | n.a.         | Unclassified  | O    | O    | O    |
| S3_vs_127395                        | n.a.                                  | n.a.      | Outlier | n.a. | A   | n.a. | n.a.              | n.a.     | n.a.          | n.a.           | n.a.         | n.a.               | n.a.         | n.a.          | n.a. | n.a. | n.a. |
| S3_vs_127397                        | Streptococcus phage Javan278          | MKA48896  | Outlier | n.a. | N12 | 6    | Streptococcus     | Group I  | Duplodnaviria | Heunggongvinae | Uroviricota  | Caudoviricetes     | n.a.         | Unclassified  | O    | O    | O    |
| S3_vs_127401                        | Streptococcus phage phiARI0746        | KT337365  | Outlier | n.a. | N5  | 12   | Streptococcus     | Group I  | Duplodnaviria | Heunggongvinae | Uroviricota  | Caudoviricetes     | n.a.         | Unclassified  | O    | O    | O    |
| S3_vs_127410                        | Clostridium phage phiCD38-2           | HM568888  | Outlier | n.a. | N15 | 3    | Clostridium       | Group I  | Duplodnaviria | Heunggongvinae | Uroviricota  | Caudoviricetes     | n.a.         | Unclassified  | O    | O    | O    |
| S3_vs_15450                         | Clostridium phage phiCT453A           | KM983327  | Outlier | n.a. | N16 | 5    | Clostridium       | Group I  | Duplodnaviria | Heunggongvinae | Uroviricota  | Caudoviricetes     | n.a.         | Unclassified  | O    | O    | O    |
| S3_vs_23194                         | Cellulophaga phage Ingeline_1         | MT732435  | Outlier | n.a. | N2  | 7    | Cellulophaga      | Group I  | Duplodnaviria | Heunggongvinae | Uroviricota  | Caudoviricetes     | n.a.         | Duncviridae   | O    | O    | O    |
| S3_vs_40939                         | n.a.                                  | n.a.      | Outlier | n.a. | A   | n.a. | n.a.              | n.a.     | n.a.          | n.a.           | n.a.         | n.a.               | n.a.         | n.a.          | n.a. | n.a. | n.a. |
| S3_vs_56292                         | Elizabethkingia phage TCUEAP3         | OK632026  | Outlier | n.a. | N12 | 6    | Elizabethkingia   | Group I  | Duplodnaviria | Heunggongvinae | Uroviricota  | Caudoviricetes     | n.a.         | Unclassified  | O    | O    | O    |
| S3_vs_62410                         | n.a.                                  | n.a.      | Outlier | n.a. | A   | n.a. | n.a.              | n.a.     | n.a.          | n.a.           | n.a.         | n.a.               | n.a.         | n.a.          | n.a. | n.a. | n.a. |
| S3_vs_6604                          | Flavobacterium phage vB_FspS_Jabun6-1 | MN812211  | Outlier | n.a. | N4  | 12   | Flavobacterium    | Group I  | Duplodnaviria | Heunggongvinae | Uroviricota  | Caudoviricetes     | n.a.         | Duncviridae   | O    | O    | O    |
| S3_vs_70093                         | n.a.                                  | n.a.      | Outlier | n.a. | A   | n.a. | n.a.              | n.a.     | n.a.          | n.a.           | n.a.         | n.a.               | n.a.         | n.a.          | n.a. | n.a. | n.a. |
| S3_vs_94577                         | Lactococcus phage C41431              | KX160219  | Outlier | n.a. | N2  | 26   | Lactococcus       | Group I  | Duplodnaviria | Heunggongvinae | Uroviricota  | Caudoviricetes     | n.a.         | Unclassified  | O    | O    | O    |
| S3_vs_97827                         | n.a.                                  | n.a.      | Outlier | n.a. | A   | n.a. | n.a.              | n.a.     | n.a.          | n.a.           | n.a.         | n.a.               | n.a.         | n.a.          | n.a. | n.a. | n.a. |
| S4_vf_13831                         | n.a.                                  | n.a.      | Outlier | n.a. | A   | n.a. | n.a.              | n.a.     | n.a.          | n.a.           | n.a.         | n.a.               | n.a.         | n.a.          | n.a. | n.a. | n.a. |
| S4_vf_20440                         | Riemerella phage RAP44                | HQ296194  | Outlier | n.a. | N11 | 5    | Riemerella        | Group I  | Duplodnaviria | Heunggongvinae | Uroviricota  | Caudoviricetes     | n.a.         | Unclassified  | O    | O    | O    |
| S4_vf_31982                         | Lactobacillus phage Ld3               | KJ564038  | Outlier | n.a. | N1  | 41   | Lactobacillus     | Group I  | Duplodnaviria | Heunggongvinae | Uroviricota  | Caudoviricetes     | n.a.         | Unclassified  | O    | O    | O    |
| S4_vs_VIRSorter_2744-cat_3          | Bifidobacterium phage Bbif-1          | QQ141189  | Outlier | n.a. | N5  | 9    | Bifidobacterium   | Group I  | Duplodnaviria | Heunggongvinae | Uroviricota  | Caudoviricetes     | n.a.         | Unclassified  | O    | O    | O    |
| S4_vs_VIRSorter_31972-circularcat_2 | Faecalibacterium phage FP_Lugh        | MG711464  | Outlier | n.a. | N18 | 4    | Faecalibacterium  | Group I  | Duplodnaviria | Heunggongvinae | Uroviricota  | Caudoviricetes     | n.a.         | Unclassified  | O    | O    | O    |
| S4_vs_VIRSorter_5698-cat_2          | Bifidobacterium phage Bbif-1          | QQ141189  | Outlier | n.a. | N3  | 17   | Bifidobacterium   | Group I  | Duplodnaviria | Heunggongvinae | Uroviricota  | Caudoviricetes     | n.a.         | Unclassified  | O    | O    | O    |
| S5_vf_103206                        | n.a.                                  | n.a.      | Outlier | n.a. | F   | n.a. | n.a.              | n.a.     | n.a.          | n.a.           | n.a.         | n.a.               | n.a.         | n.a.          | n.a. | n.a. | n.a. |
| S5_vf_116300                        | n.a.                                  | n.a.      | Outlier | n.a. | A   | n.a. | n.a.              | n.a.     | n.a.          | n.a.           | n.a.         | n.a.               | n.a.         | n.a.          | n.a. | n.a. | n.a. |
| S5_vf_55687                         | Lactococcus phage M5938               | KC337687  | Outlier | n.a. | N1  | 58   | Lactococcus       | Group I  | Duplodnaviria | Heunggongvinae | Uroviricota  | Caudoviricetes     | n.a.         | Unclassified  | O    | O    | O    |
| S5_vf_8808                          | Lactobacillus phage c5                | EU340421  | Outlier | n.a. | N5  | 8    | Lactobacillus     | Group I  | Duplodnaviria | Heunggongvinae | Uroviricota  | Caudoviricetes     | n.a.         | Unclassified  | O    | O    | O    |
| S5_vs_10428                         | Faecalibacterium phage FP_Titanis     | MG711467  | Outlier | n.a. | N3  | 17   | Faecalibacterium  | Group I  | Duplodnaviria | Heunggongvinae | Uroviricota  | Caudoviricetes     | n.a.         | Unclassified  | O    | O    | O    |
| S5_vs_112452                        | Clostridium phage phiCT453A           | KM983327  | Outlier | n.a. | N7  | 16   | Clostridium       | Group I  | Duplodnaviria | Heunggongvinae | Uroviricota  | Caudoviricetes     | n.a.         | Unclassified  | O    | O    | O    |
| S5_vs_113386                        | n.a.                                  | n.a.      | Outlier | n.a. | A   | n.a. | n.a.              | n.a.     | n.a.          | n.a.           | n.a.         | n.a.               | n.a.         | n.a.          | n.a. | n.a. | n.a. |
| S5_vs_118168                        | n.a.                                  | n.a.      | Outlier | n.a. | A   | n.a. | n.a.              | n.a.     | n.a.          | n.a.           | n.a.         | n.a.               | n.a.         | n.a.          | n.a. | n.a. | n.a. |
| S5_vs_120584                        | Streptococcus phage Dp-1              | HQ268735  | Outlier | n.a. | N2  | 13   | Streptococcus     | Group I  | Duplodnaviria | Heunggongvinae | Uroviricota  | Caudoviricetes     | n.a.         | Unclassified  | O    | O    | O    |

|               |                                   |          |                                   |      |     |      |                  |              |               |               |              |                    |              |                   |              |      |      |
|---------------|-----------------------------------|----------|-----------------------------------|------|-----|------|------------------|--------------|---------------|---------------|--------------|--------------------|--------------|-------------------|--------------|------|------|
| S5_vs_121411  | n.a.                              | n.a.     | Outlier                           | n.a. | A   | n.a. | n.a.             | n.a.         | n.a.          | n.a.          | n.a.         | n.a.               | n.a.         | n.a.              | n.a.         | n.a. | n.a. |
| S5_vs_122618  | n.a.                              | n.a.     | Outlier                           | n.a. | A   | n.a. | n.a.             | n.a.         | n.a.          | n.a.          | n.a.         | n.a.               | n.a.         | n.a.              | n.a.         | n.a. | n.a. |
| S5_vs_128398  | Faecalibacterium phage FP_Epona   | MG711462 | Outlier                           | n.a. | N10 | 30   | Faecalibacterium | Group I      | Duplodnaviria | Heunggongvine | Urovincota   | Caudoviricetes     | n.a.         | Unclassified      | O            | O    | O    |
| S5_vs_128881  | n.a.                              | n.a.     | Outlier                           | n.a. | A   | n.a. | n.a.             | n.a.         | n.a.          | n.a.          | n.a.         | n.a.               | n.a.         | n.a.              | n.a.         | n.a. | n.a. |
| S5_vs_130032  | Escherichia phage 2H10            | LR595862 | Outlier                           | n.a. | N1  | 65   | Escherichia      | Group I      | Duplodnaviria | Heunggongvine | Urovincota   | Caudoviricetes     | n.a.         | Unclassified      | O            | O    | O    |
| S5_vs_130476  | n.a.                              | n.a.     | Outlier                           | n.a. | A   | n.a. | n.a.             | n.a.         | n.a.          | n.a.          | n.a.         | n.a.               | n.a.         | n.a.              | n.a.         | n.a. | n.a. |
| S5_vs_141621  | Clostridium phage phiCT19406B     | KM983331 | Outlier                           | n.a. | N4  | 10   | Clostridium      | Group I      | Duplodnaviria | Heunggongvine | Urovincota   | Caudoviricetes     | n.a.         | Unclassified      | O            | O    | O    |
| S5_vs_145582  | Phage WC36-2                      | OL791266 | Outlier                           | n.a. | N4  | 23   | Unspecified      | Group I      | Duplodnaviria | Heunggongvine | Urovincota   | Caudoviricetes     | n.a.         | Unclassified      | O            | O    | O    |
| S5_vs_145611  | Clostridium phage phiCT453A       | KM983327 | Outlier                           | n.a. | N7  | 13   | Clostridium      | Group I      | Duplodnaviria | Heunggongvine | Urovincota   | Caudoviricetes     | n.a.         | Unclassified      | O            | O    | O    |
| S5_vs_32885   | Faecalibacterium phage FP_Lagaffe | MG711461 | Outlier                           | n.a. | N3  | 13   | Faecalibacterium | Group I      | Duplodnaviria | Heunggongvine | Urovincota   | Caudoviricetes     | n.a.         | Unclassified      | O            | O    | O    |
| S5_vs_37659   | n.a.                              | n.a.     | Outlier                           | n.a. | A   | n.a. | n.a.             | n.a.         | n.a.          | n.a.          | n.a.         | n.a.               | n.a.         | n.a.              | n.a.         | n.a. | n.a. |
| S5_vs_43207   | Faecalibacterium phage FP_Lugh    | MG711464 | Outlier                           | n.a. | N15 | 1    | Faecalibacterium | Group I      | Duplodnaviria | Heunggongvine | Urovincota   | Caudoviricetes     | n.a.         | Unclassified      | O            | O    | O    |
| S5_vs_46394   | n.a.                              | n.a.     | Outlier                           | n.a. | A   | n.a. | n.a.             | n.a.         | n.a.          | n.a.          | n.a.         | n.a.               | n.a.         | n.a.              | n.a.         | n.a. | n.a. |
| S5_vs_4737    | n.a.                              | n.a.     | Outlier                           | n.a. | A   | n.a. | n.a.             | n.a.         | n.a.          | n.a.          | n.a.         | n.a.               | n.a.         | n.a.              | n.a.         | n.a. | n.a. |
| S5_vs_51416   | Faecalibacterium phage FP_Lugh    | MG711464 | Outlier                           | n.a. | N26 | 1    | Faecalibacterium | Group I      | Duplodnaviria | Heunggongvine | Urovincota   | Caudoviricetes     | n.a.         | Unclassified      | O            | O    | O    |
| S5_vs_59798   | Lactobacillus phage c5            | EU340421 | Outlier                           | n.a. | N10 | 6    | Lactobacillus    | Group I      | Duplodnaviria | Heunggongvine | Urovincota   | Caudoviricetes     | n.a.         | Unclassified      | O            | O    | O    |
| S5_vs_72532   | Bacteroides phage p00             | BK010646 | Outlier                           | n.a. | N2  | 30   | Bacteroides      | Group I      | Duplodnaviria | Heunggongvine | Urovincota   | Caudoviricetes     | n.a.         | Unclassified      | O            | O    | O    |
| S5_vs_80911   | Clostridium phage phiSM101        | CP000315 | Outlier                           | n.a. | N4  | 3    | Clostridium      | Group I      | Duplodnaviria | Heunggongvine | Urovincota   | Caudoviricetes     | n.a.         | Unclassified      | O            | O    | O    |
| S5_vs_8125    | Clostridium phage phiSM101        | CP000315 | Outlier                           | n.a. | N6  | 8    | Clostridium      | Group I      | Duplodnaviria | Heunggongvine | Urovincota   | Caudoviricetes     | n.a.         | Unclassified      | O            | O    | O    |
| S5_vs_859     | n.a.                              | n.a.     | Outlier                           | n.a. | A   | n.a. | n.a.             | n.a.         | n.a.          | n.a.          | n.a.         | n.a.               | n.a.         | n.a.              | n.a.         | n.a. | n.a. |
| S5_vs_89540   | Lactobacillus phage CL2           | KR090567 | Outlier                           | n.a. | N1  | 19   | Lactobacillus    | Group I      | Duplodnaviria | Heunggongvine | Urovincota   | Caudoviricetes     | n.a.         | Unclassified      | O            | O    | O    |
| S6_vc_47238   | Pectobacterium phage DU_PP_III    | MF979562 | Outlier                           | n.a. | N2  | 13   | Pectobacterium   | Group I      | Duplodnaviria | Heunggongvine | Urovincota   | Caudoviricetes     | n.a.         | Unclassified      | O            | O    | O    |
| S6_vc_56484   | Faecalibacterium phage FP_Lugh    | MG711464 | Outlier                           | n.a. | N9  | 9    | Faecalibacterium | Group I      | Duplodnaviria | Heunggongvine | Urovincota   | Caudoviricetes     | n.a.         | Unclassified      | O            | O    | O    |
| S6_vs_37812   | Rhodobacter phage RcOceamus       | MW677520 | Outlier                           | n.a. | N1  | 9    | Rhodobacter      | Group I      | Duplodnaviria | Heunggongvine | Urovincota   | Caudoviricetes     | n.a.         | Unclassified      | O            | O    | O    |
| S6_vs_39065   | n.a.                              | n.a.     | Outlier                           | n.a. | A   | n.a. | n.a.             | n.a.         | n.a.          | n.a.          | n.a.         | n.a.               | n.a.         | n.a.              | n.a.         | n.a. | n.a. |
| S6_vs_44070   | Bacteriophage sp.                 | MW204289 | Outlier                           | n.a. | N1  | 11   | Unspecified      | Unclassified | Unclassified  | n.a.          | n.a.         | n.a.               | n.a.         | Unclassified      | O            | O    | O    |
| S7_vc_13614   | Streptococcus phage Javan583      | MK448814 | Outlier                           | n.a. | N3  | 23   | Streptococcus    | Group I      | Duplodnaviria | Heunggongvine | Urovincota   | Caudoviricetes     | n.a.         | Unclassified      | O            | O    | O    |
| S7_vc_138225  | Ralstonia phage RPSC1             | MF893341 | Outlier                           | n.a. | N3  | 4    | Ralstonia        | Group I      | Duplodnaviria | Heunggongvine | Urovincota   | Caudoviricetes     | n.a.         | Autographiviridae | O            | O    | O    |
| S7_vc_20941   | Lactococcus phage P680            | KC182551 | Outlier                           | n.a. | N1  | 60   | Lactococcus      | Group I      | Duplodnaviria | Heunggongvine | Urovincota   | Caudoviricetes     | n.a.         | Unclassified      | O            | O    | O    |
| S7_vc_5801    | Riemerella phage RAP44            | HQ396194 | Outlier                           | n.a. | N1  | 20   | Riemerella       | Group I      | Duplodnaviria | Heunggongvine | Urovincota   | Caudoviricetes     | n.a.         | Unclassified      | O            | O    | O    |
| S7_vc_68239   | Lactococcus phage 62601           | MF448564 | Outlier                           | n.a. | N1  | 46   | Lactococcus      | Group I      | Duplodnaviria | Heunggongvine | Urovincota   | Caudoviricetes     | n.a.         | Unclassified      | O            | O    | O    |
| S7_vc_83624   | Clostridium phage HM2             | LT600745 | Outlier                           | n.a. | N28 | 4    | Clostridium      | Group I      | Duplodnaviria | Heunggongvine | Urovincota   | Caudoviricetes     | n.a.         | Salasmaviridae    | O            | O    | O    |
| S7_vc_9334    | Pedoviridae sp.                   | MW202898 | Outlier                           | n.a. | N1  | 9    | Unspecified      | Group I      | Duplodnaviria | Heunggongvine | Urovincota   | Caudoviricetes     | n.a.         | Unclassified      | O            | O    | O    |
| S7_vs_134784  | Faecalibacterium phage FP_Lugh    | MG711464 | Outlier                           | n.a. | N4  | 7    | Faecalibacterium | Group I      | Duplodnaviria | Heunggongvine | Urovincota   | Caudoviricetes     | n.a.         | Unclassified      | O            | O    | O    |
| S7_vs_138140  | n.a.                              | n.a.     | Outlier                           | n.a. | A   | n.a. | n.a.             | n.a.         | n.a.          | n.a.          | n.a.         | n.a.               | n.a.         | n.a.              | n.a.         | n.a. | n.a. |
| S7_vs_14275   | n.a.                              | n.a.     | Outlier                           | n.a. | A   | n.a. | n.a.             | n.a.         | n.a.          | n.a.          | n.a.         | n.a.               | n.a.         | n.a.              | n.a.         | n.a. | n.a. |
| S7_vs_16344   | Campylobacter phage PC10          | MZ047271 | Outlier                           | n.a. | N1  | 15   | Campylobacter    | Group I      | Duplodnaviria | Heunggongvine | Urovincota   | Caudoviricetes     | n.a.         | Unclassified      | O            | O    | O    |
| S7_vs_21521   | n.a.                              | n.a.     | Outlier                           | n.a. | A   | n.a. | n.a.             | n.a.         | n.a.          | n.a.          | n.a.         | n.a.               | n.a.         | n.a.              | n.a.         | n.a. | n.a. |
| S7_vs_26235   | n.a.                              | n.a.     | Outlier                           | n.a. | A   | n.a. | n.a.             | n.a.         | n.a.          | n.a.          | n.a.         | n.a.               | n.a.         | n.a.              | n.a.         | n.a. | n.a. |
| S7_vs_29595   | Pseudomonas phage BHU-1           | OK638201 | Outlier                           | n.a. | N1  | 9    | Pseudomonas      | Group I      | Duplodnaviria | Heunggongvine | Urovincota   | Caudoviricetes     | n.a.         | Unclassified      | O            | O    | O    |
| S7_vs_36656   | Clostridium phage phiCT453A       | KM983327 | Outlier                           | n.a. | N1  | 16   | Clostridium      | Group I      | Duplodnaviria | Heunggongvine | Urovincota   | Caudoviricetes     | n.a.         | Unclassified      | O            | O    | O    |
| S7_vs_40259   | Clostridium phage phiCDEM19       | LR985322 | Outlier                           | n.a. | N7  | 9    | Clostridium      | Group I      | Duplodnaviria | Heunggongvine | Urovincota   | Caudoviricetes     | n.a.         | Unclassified      | O            | O    | O    |
| S7_vs_51332   | n.a.                              | n.a.     | Outlier                           | n.a. | A   | n.a. | n.a.             | n.a.         | n.a.          | n.a.          | n.a.         | n.a.               | n.a.         | n.a.              | n.a.         | n.a. | n.a. |
| S7_vs_55031   | n.a.                              | n.a.     | Outlier                           | n.a. | A   | n.a. | n.a.             | n.a.         | n.a.          | n.a.          | n.a.         | n.a.               | n.a.         | n.a.              | n.a.         | n.a. | n.a. |
| S7_vs_70265   | Clostridium phage HM2             | LT600745 | Outlier                           | n.a. | N32 | 4    | Clostridium      | Group I      | Duplodnaviria | Heunggongvine | Urovincota   | Caudoviricetes     | n.a.         | Salasmaviridae    | O            | O    | O    |
| S7_vs_72737   | n.a.                              | n.a.     | Outlier                           | n.a. | A   | n.a. | n.a.             | n.a.         | n.a.          | n.a.          | n.a.         | n.a.               | n.a.         | n.a.              | n.a.         | n.a. | n.a. |
| S8_vc_122206  | Bacteroides phage LoVEphage       | MW660583 | Outlier                           | n.a. | N8  | 13   | Bacteroides      | Group I      | Duplodnaviria | Heunggongvine | Urovincota   | Caudoviricetes     | n.a.         | Unclassified      | O            | O    | O    |
| S8_vc_13709   | Faecalibacterium phage FP_Lugh    | MG711464 | Outlier                           | n.a. | N8  | 6    | Faecalibacterium | Group I      | Duplodnaviria | Heunggongvine | Urovincota   | Caudoviricetes     | n.a.         | Unclassified      | O            | O    | O    |
| S8_vc_147338  | Faecalibacterium phage FP_oengus  | MG711463 | Outlier                           | n.a. | N21 | 32   | Faecalibacterium | Group I      | Duplodnaviria | Heunggongvine | Urovincota   | Caudoviricetes     | n.a.         | Unclassified      | O            | O    | O    |
| S8_vc_192724  | Clostridium phage HM2             | LT600745 | Outlier                           | n.a. | N2  | 4    | Clostridium      | Group I      | Duplodnaviria | Heunggongvine | Urovincota   | Caudoviricetes     | n.a.         | Salasmaviridae    | O            | O    | O    |
| S8_vc_65522   | n.a.                              | n.a.     | Outlier                           | n.a. | A   | n.a. | n.a.             | n.a.         | n.a.          | n.a.          | n.a.         | n.a.               | n.a.         | n.a.              | n.a.         | n.a. | n.a. |
| S8_vs_110692  | Streptococcus phage Javan278      | MK448896 | Outlier                           | n.a. | N10 | 8    | Streptococcus    | Group I      | Duplodnaviria | Heunggongvine | Urovincota   | Caudoviricetes     | n.a.         | Unclassified      | O            | O    | O    |
| S8_vs_113059  | Gokushovirus WZ-2015a             | KT264759 | Outlier                           | n.a. | N1  | 14   | Unspecified      | Group II     | Monodnaviria  | Sangervine    | Phixviricota | Malgrandaviricetes | Petitvirales | Microviridae      | O            | O    | O    |
| S8_vs_126582  | Phage DP_SC_6_H4_2017             | MT121964 | Outlier                           | n.a. | N1  | 97   | Unspecified      | Group I      | Duplodnaviria | Heunggongvine | Urovincota   | Caudoviricetes     | n.a.         | Unclassified      | O            | O    | O    |
| S8_vs_132472  | n.a.                              | n.a.     | Outlier                           | n.a. | A   | n.a. | n.a.             | n.a.         | n.a.          | n.a.          | n.a.         | n.a.               | n.a.         | n.a.              | n.a.         | n.a. | n.a. |
| S8_vs_147670  | Clostridioides phage CD1801       | MW512570 | Outlier                           | n.a. | N1  | 9    | Clostridioides   | Group I      | Duplodnaviria | Heunggongvine | Urovincota   | Caudoviricetes     | n.a.         | Unclassified      | O            | O    | O    |
| S8_vs_147697  | n.a.                              | n.a.     | Outlier                           | n.a. | A   | n.a. | n.a.             | n.a.         | n.a.          | n.a.          | n.a.         | n.a.               | n.a.         | n.a.              | n.a.         | n.a. | n.a. |
| S8_vs_185041  | Gardnerella phage vB_Gva_ABI      | MW387018 | Outlier                           | n.a. | N4  | 38   | Gardnerella      | Group I      | Duplodnaviria | Heunggongvine | Urovincota   | Caudoviricetes     | n.a.         | Unclassified      | O            | O    | O    |
| S8_vs_3224    | n.a.                              | n.a.     | Outlier                           | n.a. | A   | n.a. | n.a.             | n.a.         | n.a.          | n.a.          | n.a.         | n.a.               | n.a.         | n.a.              | n.a.         | n.a. | n.a. |
| S8_vs_63277   | Faecalibacterium phage FP_Lugh    | MG711464 | Outlier                           | n.a. | N1  | 37   | Faecalibacterium | Group I      | Duplodnaviria | Heunggongvine | Urovincota   | Caudoviricetes     | n.a.         | Unclassified      | O            | O    | O    |
| S8_vs_72117   | n.a.                              | n.a.     | Outlier                           | n.a. | A   | n.a. | n.a.             | n.a.         | n.a.          | n.a.          | n.a.         | n.a.               | n.a.         | n.a.              | n.a.         | n.a. | n.a. |
| S9_vc_19284   | n.a.                              | n.a.     | Outlier                           | n.a. | A   | n.a. | n.a.             | n.a.         | n.a.          | n.a.          | n.a.         | n.a.               | n.a.         | n.a.              | n.a.         | n.a. | n.a. |
| S9_vc_934     | Curtobacterium phage Pencoan      | MZ333133 | Outlier                           | n.a. | N1  | 13   | Curtobacterium   | Group I      | Duplodnaviria | Heunggongvine | Urovincota   | Caudoviricetes     | n.a.         | Unclassified      | O            | O    | O    |
| S9_vs_14235   | n.a.                              | n.a.     | Outlier                           | n.a. | A   | n.a. | n.a.             | n.a.         | n.a.          | n.a.          | n.a.         | n.a.               | n.a.         | n.a.              | n.a.         | n.a. | n.a. |
| S9_vs_19689   | n.a.                              | n.a.     | Outlier                           | n.a. | A   | n.a. | n.a.             | n.a.         | n.a.          | n.a.          | n.a.         | n.a.               | n.a.         | n.a.              | n.a.         | n.a. | n.a. |
| S9_vs_2799    | n.a.                              | n.a.     | Outlier                           | n.a. | A   | n.a. | n.a.             | n.a.         | n.a.          | n.a.          | n.a.         | n.a.               | n.a.         | n.a.              | n.a.         | n.a. | n.a. |
| S9_vs_41571   | Psychrobacillus phage PVJ1        | MZ983385 | Outlier                           | n.a. | N3  | 14   | Psychrobacillus  | Group I      | Duplodnaviria | Heunggongvine | Urovincota   | Caudoviricetes     | n.a.         | Unclassified      | O            | O    | O    |
| S9_vs_44331   | Ruminococcus phage phiRg519T2     | MT980838 | Outlier                           | n.a. | N7  | 9    | Ruminococcus     | Group I      | Duplodnaviria | Heunggongvine | Urovincota   | Caudoviricetes     | n.a.         | Unclassified      | O            | O    | O    |
| S9_vs_45738   | Streptococcus phage Javan355      | MK448738 | Outlier                           | n.a. | N6  | 8    | Streptococcus    | Group I      | Duplodnaviria | Heunggongvine | Urovincota   | Caudoviricetes     | n.a.         | Unclassified      | O            | O    | O    |
| S9_vs_58086   | Streptococcus phage Javan290      | MK448900 | Outlier                           | n.a. | N15 | 5    | Streptococcus    | Group I      | Duplodnaviria | Heunggongvine | Urovincota   | Caudoviricetes     | n.a.         | Unclassified      | O            | O    | O    |
| S9_vs_62803   | Faecalibacterium phage FP_Lugh    | MG711464 | Outlier                           | n.a. | N3  | 22   | Faecalibacterium | Group I      | Duplodnaviria | Heunggongvine | Urovincota   | Caudoviricetes     | n.a.         | Unclassified      | O            | O    | O    |
| S9_vs_66877   | Faecalibacterium phage FP_Lugh    | MG711464 | Outlier                           | n.a. | N3  | 16   | Faecalibacterium | Group I      | Duplodnaviria | Heunggongvine | Urovincota   | Caudoviricetes     | n.a.         | Unclassified      | O            | O    | O    |
| S9_vs_67792   | Phage WC36-2                      | OL791266 | Outlier                           | n.a. | N2  | 23   | Unspecified      | Group I      | Duplodnaviria | Heunggongvine | Urovincota   | Caudoviricetes     | n.a.         | Unclassified      | O            | O    | O    |
| S14_vc_117162 | Bacteroides phage EMB2            | ON721385 | Overlap (VC_1044/VC_1047)         | n.a. | C7  | 57   | Bacteroides      | Group I      | Duplodnaviria | Heunggongvine | Urovincota   | Caudoviricetes     | n.a.         | Unclassified      | Unclassified | O    | O    |
| S17_vc_177200 | Bacteroides phage EMB2            | ON721385 | Overlap (VC_1044/VC_1047)         | n.a. | C7  | 57   | Bacteroides      | Group I      | Duplodnaviria | Heunggongvine | Urovincota   | Caudoviricetes     | n.a.         | Unclassified      | Unclassified | O    | O    |
| S11_vc_104062 | Bacteroides phage EMB2            | ON721385 | Overlap (VC_1044/VC_1047/VC_1488) | n.a. | C4  | 143  | Bacteroides      | Group I      | Duplodnaviria | Heunggongvine | Urovincota   | Caudoviricetes     | n.a.         | Unclassified      | Unclassified | O    | O    |
| S7_vc_27309   | Bacteroides phage EMB2            | ON721385 | Overlap (VC_1044/VC_1047/VC_1488) | n.a. | C1  | 150  | Bacteroides      | Group I      | Duplodnaviria | Heunggongvine | Urovincota   | Caudoviricetes     | n.a.         | Unclassified      | Unclassified | O    | O    |
| S12_vc_145044 | n.a.                              | n.a.     | Overlap (VC_1080/VC_1510)         | n.a. | A   | n.a. | n.a.             | n.a.         | n.a.          | n.a.          | n.a.         | n.a.               | n.a.         | n.a.              | n.a.         | n.a. | n.a. |
| S12_vc_32615  | n.a.                              | n.a.     | Overlap (VC_1080/VC_1510)         | n.a. | A   | n.a. | n.a.             | n.a.         | n.a.          | n.a.          | n.a.         | n.a.               | n.a.         | n.a.              | n.a.         | n.a. | n.a. |
| S15_vc_33505  | uncultured phage cF53_1           | MT774396 | Overlap (VC_1086/VC_1243)         | n.a. | N6  | 2    | Unspecified      | Group I      | Duplodnaviria | Heunggongvine | Urovincota   | Caudoviricetes     | Crassvirales | Saolviridae       | O            | O    | O    |
| S5_vs_117319  | Faecalibacterium phage FP_oengus  | MG711463 | Overlap (VC_1086/VC_1243)         | n.a. | C1  | 149  | Faecalibacterium | Group I      | Duplodnaviria | Heunggongvine | Urovincota   | Caudoviricetes     | n.a.         | Unclassified      | Unclassified | O    | O    |
| S6_vs_34453   | Faecalibacterium phage FP_oengus  | MG711463 | Overlap (VC_1086/VC_1243)         | n.a. | C1  | 143  | Faecalibacterium | Group I      | Duplodnaviria | Heunggongvine | Urovincota   | Caudoviricetes     | n.a.         | Unclassified      | Unclassified | O    | O    |

|               |                                  |          |                           |      |     |      |                  |          |               |               |              |                    |               |                |                |      |
|---------------|----------------------------------|----------|---------------------------|------|-----|------|------------------|----------|---------------|---------------|--------------|--------------------|---------------|----------------|----------------|------|
| S7_vs_87279   | Faecalibacterium phage FP_census | MG711463 | Overlap (VC_1086/VC_1243) | n.a. | C1  | 178  | Faecalibacterium | Group I  | Duplodnaviria | Heunggongvine | Urovincota   | Caudoviricetes     | n.a.          | Unclassified   | Unclassified   | O    |
| S3_vs_51931   | Gokushovirus WZ-2015a            | KT264829 | Overlap (VC_1098/VC_1100) | n.a. | C1  | 28   | Unspecified      | Group II | Monodnaviria  | Sangervirine  | Phixviricota | Malgrandaviricetes | Petitivirales | Microviridae   | Gokushovirinae | O    |
| S16_vs_101671 | Microviridae sp.                 | MG945704 | Overlap (VC_1160/VC_1164) | n.a. | C1  | 23   | Unspecified      | Group II | Monodnaviria  | Sangervirine  | Phixviricota | Malgrandaviricetes | Petitivirales | Microviridae   | Unclassified   | O    |
| S17_vs_177210 | Microviridae sp.                 | MG945704 | Overlap (VC_1160/VC_1164) | n.a. | C1  | 17   | Unspecified      | Group II | Monodnaviria  | Sangervirine  | Phixviricota | Malgrandaviricetes | Petitivirales | Microviridae   | Unclassified   | O    |
| S1_vs_3267    | Microviridae sp.                 | MG945704 | Overlap (VC_1160/VC_1164) | n.a. | C1  | 22   | Unspecified      | Group II | Monodnaviria  | Sangervirine  | Phixviricota | Malgrandaviricetes | Petitivirales | Microviridae   | Unclassified   | O    |
| S3_vs_51005   | Microviridae sp.                 | MG945704 | Overlap (VC_1160/VC_1164) | n.a. | C1  | 19   | Unspecified      | Group II | Monodnaviria  | Sangervirine  | Phixviricota | Malgrandaviricetes | Petitivirales | Microviridae   | Unclassified   | O    |
| S16_vs_118029 | Roseburia phage Jekyll           | LR596902 | Overlap (VC_1254/VC_1595) | n.a. | N16 | 5    | Roseburia        | Group I  | Duplodnaviria | Heunggongvine | Urovincota   | Caudoviricetes     | n.a.          | Unclassified   | O              | O    |
| S7_vs_30640   | Faecalibacterium phage FP_Lugh   | MG711464 | Overlap (VC_1254/VC_1595) | n.a. | N20 | 1    | Faecalibacterium | Group I  | Duplodnaviria | Heunggongvine | Urovincota   | Caudoviricetes     | n.a.          | Unclassified   | O              | O    |
| S11_vs_49071  | n.a.                             | n.a.     | Overlap (VC_1255/VC_1558) | n.a. | A   | n.a. | n.a.             | n.a.     | n.a.          | n.a.          | n.a.         | n.a.               | n.a.          | n.a.           | n.a.           | n.a. |
| S7_vs_101751  | n.a.                             | n.a.     | Overlap (VC_1255/VC_1558) | n.a. | A   | n.a. | n.a.             | n.a.     | n.a.          | n.a.          | n.a.         | n.a.               | n.a.          | n.a.           | n.a.           | n.a. |
| S7_vs_137998  | n.a.                             | n.a.     | Overlap (VC_1255/VC_1558) | n.a. | A   | n.a. | n.a.             | n.a.     | n.a.          | n.a.          | n.a.         | n.a.               | n.a.          | n.a.           | n.a.           | n.a. |
| S12_vs_26847  | n.a.                             | n.a.     | Overlap (VC_1255/VC_1593) | n.a. | A   | n.a. | n.a.             | n.a.     | n.a.          | n.a.          | n.a.         | n.a.               | n.a.          | n.a.           | n.a.           | n.a. |
| S16_vs_5809   | n.a.                             | n.a.     | Overlap (VC_1255/VC_1593) | n.a. | A   | n.a. | n.a.             | n.a.     | n.a.          | n.a.          | n.a.         | n.a.               | n.a.          | n.a.           | n.a.           | n.a. |
| S16_vs_84462  | n.a.                             | n.a.     | Overlap (VC_1255/VC_1594) | n.a. | A   | n.a. | n.a.             | n.a.     | n.a.          | n.a.          | n.a.         | n.a.               | n.a.          | n.a.           | n.a.           | n.a. |
| S5_vs_60597   | n.a.                             | n.a.     | Overlap (VC_1255/VC_1594) | n.a. | A   | n.a. | n.a.             | n.a.     | n.a.          | n.a.          | n.a.         | n.a.               | n.a.          | n.a.           | n.a.           | n.a. |
| S8_vs_201695  | n.a.                             | n.a.     | Overlap (VC_1255/VC_1594) | n.a. | A   | n.a. | n.a.             | n.a.     | n.a.          | n.a.          | n.a.         | n.a.               | n.a.          | n.a.           | n.a.           | n.a. |
| S3_vs_127421  | Roseburia phage Jekyll           | LR596902 | Overlap (VC_1256/VC_1564) | n.a. | N2  | 26   | Roseburia        | Group I  | Duplodnaviria | Heunggongvine | Urovincota   | Caudoviricetes     | n.a.          | Unclassified   | O              | O    |
| S8_vs_173961  | Roseburia phage Jekyll           | LR596902 | Overlap (VC_1256/VC_1564) | n.a. | N2  | 24   | Roseburia        | Group I  | Duplodnaviria | Heunggongvine | Urovincota   | Caudoviricetes     | n.a.          | Unclassified   | O              | O    |
| S11_vs_58587  | n.a.                             | n.a.     | Overlap (VC_1259/VC_1261) | n.a. | A   | n.a. | n.a.             | n.a.     | n.a.          | n.a.          | n.a.         | n.a.               | n.a.          | n.a.           | n.a.           | n.a. |
| S12_vs_170614 | Clostridium phage HM2            | LT600745 | Overlap (VC_1259/VC_1261) | n.a. | N34 | 4    | Clostridium      | Group I  | Duplodnaviria | Heunggongvine | Urovincota   | Caudoviricetes     | n.a.          | Salasmaviridae | O              | O    |
| S16_vs_100473 | n.a.                             | n.a.     | Overlap (VC_1259/VC_1261) | n.a. | A   | n.a. | n.a.             | n.a.     | n.a.          | n.a.          | n.a.         | n.a.               | n.a.          | n.a.           | n.a.           | n.a. |
| S16_vs_94866  | n.a.                             | n.a.     | Overlap (VC_1259/VC_1261) | n.a. | A   | n.a. | n.a.             | n.a.     | n.a.          | n.a.          | n.a.         | n.a.               | n.a.          | n.a.           | n.a.           | n.a. |
| S5_vs_38011   | n.a.                             | n.a.     | Overlap (VC_1259/VC_1261) | n.a. | A   | n.a. | n.a.             | n.a.     | n.a.          | n.a.          | n.a.         | n.a.               | n.a.          | n.a.           | n.a.           | n.a. |
| S6_vs_24553   | n.a.                             | n.a.     | Overlap (VC_1259/VC_1261) | n.a. | A   | n.a. | n.a.             | n.a.     | n.a.          | n.a.          | n.a.         | n.a.               | n.a.          | n.a.           | n.a.           | n.a. |
| S7_vs_32396   | n.a.                             | n.a.     | Overlap (VC_1259/VC_1261) | n.a. | A   | n.a. | n.a.             | n.a.     | n.a.          | n.a.          | n.a.         | n.a.               | n.a.          | n.a.           | n.a.           | n.a. |
| S7_vs_89668   | n.a.                             | n.a.     | Overlap (VC_1259/VC_1261) | n.a. | A   | n.a. | n.a.             | n.a.     | n.a.          | n.a.          | n.a.         | n.a.               | n.a.          | n.a.           | n.a.           | n.a. |
| S8_vs_153696  | n.a.                             | n.a.     | Overlap (VC_1259/VC_1261) | n.a. | A   | n.a. | n.a.             | n.a.     | n.a.          | n.a.          | n.a.         | n.a.               | n.a.          | n.a.           | n.a.           | n.a. |
| S10_vs_57705  | n.a.                             | n.a.     | Overlap (VC_1259/VC_1563) | n.a. | A   | n.a. | n.a.             | n.a.     | n.a.          | n.a.          | n.a.         | n.a.               | n.a.          | n.a.           | n.a.           | n.a. |
| S12_vs_8173   | n.a.                             | n.a.     | Overlap (VC_1259/VC_1563) | n.a. | A   | n.a. | n.a.             | n.a.     | n.a.          | n.a.          | n.a.         | n.a.               | n.a.          | n.a.           | n.a.           | n.a. |
| S15_vs_71616  | n.a.                             | n.a.     | Overlap (VC_1259/VC_1563) | n.a. | A   | n.a. | n.a.             | n.a.     | n.a.          | n.a.          | n.a.         | n.a.               | n.a.          | n.a.           | n.a.           | n.a. |
| S7_vs_107876  | Clostridium phage HM2            | LT600745 | Overlap (VC_1260/VC_1267) | n.a. | N11 | 7    | Clostridium      | Group I  | Duplodnaviria | Heunggongvine | Urovincota   | Caudoviricetes     | n.a.          | Salasmaviridae | O              | O    |
| S8_vs_3410    | Clostridium phage HM2            | LT600745 | Overlap (VC_1260/VC_1267) | n.a. | N11 | 7    | Clostridium      | Group I  | Duplodnaviria | Heunggongvine | Urovincota   | Caudoviricetes     | n.a.          | Salasmaviridae | O              | O    |
| S12_vs_61299  | Clostridium phage HM2            | LT600745 | Overlap (VC_1262/VC_1263) | n.a. | N30 | 4    | Clostridium      | Group I  | Duplodnaviria | Heunggongvine | Urovincota   | Caudoviricetes     | n.a.          | Salasmaviridae | O              | O    |
| S14_vs_93134  | Clostridium phage HM2            | LT600745 | Overlap (VC_1262/VC_1263) | n.a. | N30 | 4    | Clostridium      | Group I  | Duplodnaviria | Heunggongvine | Urovincota   | Caudoviricetes     | n.a.          | Salasmaviridae | O              | O    |
| S17_vs_36452  | Clostridium phage HM2            | LT600745 | Overlap (VC_1262/VC_1263) | n.a. | N30 | 4    | Clostridium      | Group I  | Duplodnaviria | Heunggongvine | Urovincota   | Caudoviricetes     | n.a.          | Salasmaviridae | O              | O    |
| S2_vs_17850   | Clostridium phage HM2            | LT600745 | Overlap (VC_1262/VC_1263) | n.a. | N30 | 4    | Clostridium      | Group I  | Duplodnaviria | Heunggongvine | Urovincota   | Caudoviricetes     | n.a.          | Salasmaviridae | O              | O    |
| S16_vs_147326 | Clostridium phage HM2            | LT600745 | Overlap (VC_1262/VC_1265) | n.a. | N18 | 8    | Clostridium      | Group I  | Duplodnaviria | Heunggongvine | Urovincota   | Caudoviricetes     | n.a.          | Salasmaviridae | O              | O    |
| S8_vs_159173  | Clostridium phage HM2            | LT600745 | Overlap (VC_1262/VC_1267) | n.a. | N30 | 4    | Clostridium      | Group I  | Duplodnaviria | Heunggongvine | Urovincota   | Caudoviricetes     | n.a.          | Salasmaviridae | O              | O    |
| S13_vs_97702  | Clostridium phage HM2            | LT600745 | Overlap (VC_1264/VC_1267) | n.a. | N6  | 7    | Clostridium      | Group I  | Duplodnaviria | Heunggongvine | Urovincota   | Caudoviricetes     | n.a.          | Salasmaviridae | O              | O    |
| S7_vs_13903   | Clostridium phage HM2            | LT600745 | Overlap (VC_1264/VC_1267) | n.a. | N6  | 7    | Clostridium      | Group I  | Duplodnaviria | Heunggongvine | Urovincota   | Caudoviricetes     | n.a.          | Salasmaviridae | O              | O    |
| S1_vs_145792  | n.a.                             | n.a.     | Overlap (VC_1291/VC_1578) | n.a. | A   | n.a. | n.a.             | n.a.     | n.a.          | n.a.          | n.a.         | n.a.               | n.a.          | n.a.           | n.a.           | n.a. |
| S3_vs_25896   | n.a.                             | n.a.     | Overlap (VC_1291/VC_1578) | n.a. | A   | n.a. | n.a.             | n.a.     | n.a.          | n.a.          | n.a.         | n.a.               | n.a.          | n.a.           | n.a.           | n.a. |
| S5_vs_145591  | n.a.                             | n.a.     | Overlap (VC_1291/VC_1578) | n.a. | A   | n.a. | n.a.             | n.a.     | n.a.          | n.a.          | n.a.         | n.a.               | n.a.          | n.a.           | n.a.           | n.a. |
| S5_vs_27918   | n.a.                             | n.a.     | Overlap (VC_1291/VC_1578) | n.a. | A   | n.a. | n.a.             | n.a.     | n.a.          | n.a.          | n.a.         | n.a.               | n.a.          | n.a.           | n.a.           | n.a. |
| S7_vs_72493   | n.a.                             | n.a.     | Overlap (VC_1291/VC_1578) | n.a. | A   | n.a. | n.a.             | n.a.     | n.a.          | n.a.          | n.a.         | n.a.               | n.a.          | n.a.           | n.a.           | n.a. |
| S9_vs_69322   | n.a.                             | n.a.     | Overlap (VC_1291/VC_1578) | n.a. | A   | n.a. | n.a.             | n.a.     | n.a.          | n.a.          | n.a.         | n.a.               | n.a.          | n.a.           | n.a.           | n.a. |
| S9_vs_88286   | n.a.                             | n.a.     | Overlap (VC_1291/VC_1578) | n.a. | A   | n.a. | n.a.             | n.a.     | n.a.          | n.a.          | n.a.         | n.a.               | n.a.          | n.a.           | n.a.           | n.a. |
| S13_vs_49889  | n.a.                             | n.a.     | Overlap (VC_1292/VC_1574) | n.a. | A   | n.a. | n.a.             | n.a.     | n.a.          | n.a.          | n.a.         | n.a.               | n.a.          | n.a.           | n.a.           | n.a. |
| S16_vs_59697  | n.a.                             | n.a.     | Overlap (VC_1292/VC_1574) | n.a. | A   | n.a. | n.a.             | n.a.     | n.a.          | n.a.          | n.a.         | n.a.               | n.a.          | n.a.           | n.a.           | n.a. |
| S8_vs_152553  | n.a.                             | n.a.     | Overlap (VC_1292/VC_1574) | n.a. | A   | n.a. | n.a.             | n.a.     | n.a.          | n.a.          | n.a.         | n.a.               | n.a.          | n.a.           | n.a.           | n.a. |
| S14_vs_4887   | n.a.                             | n.a.     | Overlap (VC_1292/VC_1575) | n.a. | A   | n.a. | n.a.             | n.a.     | n.a.          | n.a.          | n.a.         | n.a.               | n.a.          | n.a.           | n.a.           | n.a. |
| S7_vs_95276   | n.a.                             | n.a.     | Overlap (VC_1292/VC_1575) | n.a. | A   | n.a. | n.a.             | n.a.     | n.a.          | n.a.          | n.a.         | n.a.               | n.a.          | n.a.           | n.a.           | n.a. |
| S14_vs_90934  | n.a.                             | n.a.     | Overlap (VC_1292/VC_1610) | n.a. | A   | n.a. | n.a.             | n.a.     | n.a.          | n.a.          | n.a.         | n.a.               | n.a.          | n.a.           | n.a.           | n.a. |
| S5_vs_30490   | n.a.                             | n.a.     | Overlap (VC_1292/VC_1610) | n.a. | A   | n.a. | n.a.             | n.a.     | n.a.          | n.a.          | n.a.         | n.a.               | n.a.          | n.a.           | n.a.           | n.a. |
| S5_vs_36605   | Faecalibacterium phage FP_Lugh   | MG711464 | Overlap (VC_1294/VC_1575) | n.a. | N14 | 3    | Faecalibacterium | Group I  | Duplodnaviria | Heunggongvine | Urovincota   | Caudoviricetes     | n.a.          | Unclassified   | O              | O    |
| S6_vs_22637   | n.a.                             | n.a.     | Overlap (VC_1294/VC_1575) | n.a. | A   | n.a. | n.a.             | n.a.     | n.a.          | n.a.          | n.a.         | n.a.               | n.a.          | n.a.           | n.a.           | n.a. |
| S12_vs_188846 | Tortoise microvirus 19           | MKT65569 | Overlap (VC_1300/VC_1301) | n.a. | N4  | 9    | Unspecified      | Group II | Monodnaviria  | Sangervirine  | Phixviricota | Malgrandaviricetes | Petitivirales | Microviridae   | O              | O    |
| S8_vs_208115  | Tortoise microvirus 19           | MKT65569 | Overlap (VC_1300/VC_1301) | n.a. | N3  | 9    | Unspecified      | Group II | Monodnaviria  | Sangervirine  | Phixviricota | Malgrandaviricetes | Petitivirales | Microviridae   | O              | O    |
| S14_vs_43340  | Tortoise microvirus 14           | MKT65564 | Overlap (VC_1300/VC_1302) | n.a. | N2  | 4    | Unspecified      | Group II | Monodnaviria  | Sangervirine  | Phixviricota | Malgrandaviricetes | Petitivirales | Microviridae   | O              | O    |
| S3_vs_59078   | Tortoise microvirus 14           | MKT65564 | Overlap (VC_1300/VC_1302) | n.a. | N2  | 4    | Unspecified      | Group II | Monodnaviria  | Sangervirine  | Phixviricota | Malgrandaviricetes | Petitivirales | Microviridae   | O              | O    |
| S17_vs_128147 | Microvirus marf3                 | MZ089809 | Overlap (VC_1335/VC_1337) | n.a. | C1  | 17   | Unspecified      | Group II | Monodnaviria  | Sangervirine  | Phixviricota | Malgrandaviricetes | Petitivirales | Microviridae   | Unclassified   | O    |
| S14_vs_115736 | Butyrivibrio virus Ceridwen      | MN882553 | Overlap (VC_1481/VC_1482) | n.a. | C31 | 6    | Butyrivibrio     | Group I  | Duplodnaviria | Heunggongvine | Urovincota   | Caudoviricetes     | n.a.          | Unclassified   | Unclassified   | O    |
| S16_vs_20060  | Butyrivibrio virus Ceridwen      | MN882553 | Overlap (VC_1481/VC_1482) | n.a. | C35 | 2    | Butyrivibrio     | Group I  | Duplodnaviria | Heunggongvine | Urovincota   | Caudoviricetes     | n.a.          | Unclassified   | Unclassified   | O    |
| S1_vs_136526  | Butyrivibrio virus Ceridwen      | MN882553 | Overlap (VC_1481/VC_1482) | n.a. | C35 | 3    | Butyrivibrio     | Group I  | Duplodnaviria | Heunggongvine | Urovincota   | Caudoviricetes     | n.a.          | Unclassified   | Unclassified   | O    |
| S1_vs_6272    | Butyrivibrio virus Ceridwen      | MN882553 | Overlap (VC_1481/VC_1482) | n.a. | C36 | 6    | Butyrivibrio     | Group I  | Duplodnaviria | Heunggongvine | Urovincota   | Caudoviricetes     | n.a.          | Unclassified   | Unclassified   | O    |
| S1_vs_21439   | Butyrivibrio virus Ceridwen      | MN882553 | Overlap (VC_1481/VC_1482) | n.a. | C32 | 2    | Butyrivibrio     | Group I  | Duplodnaviria | Heunggongvine | Urovincota   | Caudoviricetes     | n.a.          | Unclassified   | Unclassified   | O    |
| S3_vs_127400  | Butyrivibrio virus Ceridwen      | MN882553 | Overlap (VC_1481/VC_1482) | n.a. | C36 | 2    | Butyrivibrio     | Group I  | Duplodnaviria | Heunggongvine | Urovincota   | Caudoviricetes     | n.a.          | Unclassified   | Unclassified   | O    |
| S8_vs_88013   | Butyrivibrio virus Ceridwen      | MN882553 | Overlap (VC_1481/VC_1482) | n.a. | C30 | 7    | Butyrivibrio     | Group I  | Duplodnaviria | Heunggongvine | Urovincota   | Caudoviricetes     | n.a.          | Unclassified   | Unclassified   | O    |
| S14_vs_112068 | n.a.                             | n.a.     | Overlap (VC_1482/VC_1570) | n.a. | A   | n.a. | n.a.             | n.a.     | n.a.          | n.a.          | n.a.         | n.a.               | n.a.          | n.a.           | n.a.           | n.a. |
| S6_vs_56492   | n.a.                             | n.a.     | Overlap (VC_1482/VC_1570) | n.a. | A   | n.a. | n.a.             | n.a.     | n.a.          | n.a.          | n.a.         | n.a.               | n.a.          | n.a.           | n.a.           | n.a. |
| S7_vs_43529   | n.a.                             | n.a.     | Overlap (VC_1482/VC_1570) | n.a. | A   | n.a. | n.a.             | n.a.     | n.a.          | n.a.          | n.a.         | n.a.               | n.a.          | n.a.           | n.a.           | n.a. |
| S17_vs_140653 | Bacteroides phage F4             | MT806185 | Overlap (VC_1506/VC_1507) | n.a. | N12 | 1    | Bacteroides      | Group I  | Duplodnaviria | Heunggongvine | Urovincota   | Caudoviricetes     | n.a.          | Unclassified   | O              | O    |
| S3_vs_9158    | n.a.                             | n.a.     | Overlap (VC_1506/VC_1507) | n.a. | A   | n.a. | n.a.             | n.a.     | n.a.          | n.a.          | n.a.         | n.a.               | n.a.          | n.a.           | n.a.           | n.a. |
| S8_vs_28956   | n.a.                             | n.a.     | Overlap (VC_1506/VC_1507) | n.a. | A   | n.a. | n.a.             | n.a.     | n.a.          | n.a.          | n.a.         | n.a.               | n.a.          | n.a.           | n.a.           | n.a. |
| S11_vs_45658  | Campylobacter phage PC10         | MZ047271 | Overlap (VC_1530/VC_1560) | n.a. | N8  | 6    | Campylobacter    | Group I  | Duplodnaviria | Heunggongvine | Urovincota   | Caudoviricetes     | n.a.          | Unclassified   | O              | O    |
| S12_vs_111286 | n.a.                             | n.a.     | Overlap (VC_1530/VC_1560) | n.a. | A   | n.a. | n.a.             | n.a.     | n.a.          | n.a.          | n.a.         | n.a.               | n.a.          | n.a.           | n.a.           | n.a. |
| S5_vs_80496   | n.a.                             | n.a.     | Overlap (VC_1530/VC_1560) | n.a. | A   | n.a. | n.a.             | n.a.     | n.a.          | n.a.          | n.a.         | n.a.               | n.a.          | n.a.           | n.a.           | n.a. |
| S5_vs_117417  | n.a.                             | n.a.     | Overlap (VC_1555/VC_1589) | n.a. | A   | n.a. | n.a.             | n.a.     | n.a.          | n.a.          | n.a.         | n.a.               | n.a.          | n.a.           | n.a.           | n.a. |
| S7_vs_28150   | n.a.                             | n.a.     | Overlap (VC_1555/VC_1589) | n.a. | A   | n.a. | n.a.             | n.a.     | n.a.          | n.a.          | n.a.         | n.a.               | n.a.          | n.a.           | n.a.           | n.a. |
| S11_vs_104049 | Clostridium phage phiMMP04       | JX145342 | Overlap (VC_1555/VC_661)  | n.a. | N7  | 9    | Clostridium      | Group I  | Duplodnaviria | Heunggongvine | Urovincota   | Caudoviricetes     | n.a.          | Unclassified   | O              | O    |
| S14_vs_56410  | Clostridium phage phiMMP04       | JX145342 | Overlap (VC_1555/VC_661)  | n.a. | N5  | 8    | Clostridium      | Group I  | Duplodnaviria | Heunggongvine | Urovincota   | Caudoviricetes     | n.a.          | Unclassified   | O              | O    |
| S5_vs_69980   | Clostridium phage phiCT453B      | KM983528 | Overlap (VC_1555/VC_661)  | n.a. | N5  | 10   | Clostridium      | Group I  | Duplodnaviria | Heunggongvine | Urovincota   | Caudoviricetes     | n.a.          | Unclassified   | O              | O    |

|                                      |                                 |           |                                   |      |     |      |                 |              |               |                |             |                |      |              |                |                |      |
|--------------------------------------|---------------------------------|-----------|-----------------------------------|------|-----|------|-----------------|--------------|---------------|----------------|-------------|----------------|------|--------------|----------------|----------------|------|
| S4_vt_7137                           | Bacteriophage sp.               | OP509880  | Overlap (VC_1550/VC_1551)         | n.a. | C3  | 24   | Unspecified     | Unclassified | Unclassified  | Unclassified   | n.a.        | n.a.           | n.a. | n.a.         | Unclassified   | Unclassified   | O    |
| S4_vt_30103                          | Bacteriophage sp.               | OP509880  | Overlap (VC_1550/VC_1551)         | n.a. | C3  | 25   | Unspecified     | Unclassified | Unclassified  | Unclassified   | n.a.        | n.a.           | n.a. | n.a.         | Unclassified   | Unclassified   | O    |
| S10_vt_113489                        | n.a.                            | n.a.      | Overlap (VC_1553/VC_1555)         | n.a. | A   | n.a. | n.a.            | n.a.         | n.a.          | n.a.           | n.a.        | n.a.           | n.a. | n.a.         | n.a.           | n.a.           | n.a. |
| S16_vt_52513                         | n.a.                            | n.a.      | Overlap (VC_1555/VC_1556)         | n.a. | A   | n.a. | n.a.            | n.a.         | n.a.          | n.a.           | n.a.        | n.a.           | n.a. | n.a.         | n.a.           | n.a.           | n.a. |
| S8_vs_51368                          | n.a.                            | n.a.      | Overlap (VC_1555/VC_1556)         | n.a. | A   | n.a. | n.a.            | n.a.         | n.a.          | n.a.           | n.a.        | n.a.           | n.a. | n.a.         | n.a.           | n.a.           | n.a. |
| S16_vs_76823                         | n.a.                            | n.a.      | Overlap (VC_1555/VC_1557)         | n.a. | A   | n.a. | n.a.            | n.a.         | n.a.          | n.a.           | n.a.        | n.a.           | n.a. | n.a.         | n.a.           | n.a.           | n.a. |
| S8_vs_102608                         | n.a.                            | n.a.      | Overlap (VC_1555/VC_1557)         | n.a. | A   | n.a. | n.a.            | n.a.         | n.a.          | n.a.           | n.a.        | n.a.           | n.a. | n.a.         | n.a.           | n.a.           | n.a. |
| S11_vs_36748                         | n.a.                            | n.a.      | Overlap (VC_1566/VC_1581)         | n.a. | A   | n.a. | n.a.            | n.a.         | n.a.          | n.a.           | n.a.        | n.a.           | n.a. | n.a.         | n.a.           | n.a.           | n.a. |
| S17_vs_157209                        | n.a.                            | n.a.      | Overlap (VC_1566/VC_1581)         | n.a. | A   | n.a. | n.a.            | n.a.         | n.a.          | n.a.           | n.a.        | n.a.           | n.a. | n.a.         | n.a.           | n.a.           | n.a. |
| S3_vs_89485                          | n.a.                            | n.a.      | Overlap (VC_1566/VC_1581/VC_1585) | n.a. | A   | n.a. | n.a.            | n.a.         | n.a.          | n.a.           | n.a.        | n.a.           | n.a. | n.a.         | n.a.           | n.a.           | n.a. |
| S8_vs_40014                          | n.a.                            | n.a.      | Overlap (VC_1566/VC_1581/VC_1585) | n.a. | A   | n.a. | n.a.            | n.a.         | n.a.          | n.a.           | n.a.        | n.a.           | n.a. | n.a.         | n.a.           | n.a.           | n.a. |
| S5_vs_40574                          | n.a.                            | n.a.      | Overlap (VC_1571/VC_1590)         | n.a. | A   | n.a. | n.a.            | n.a.         | n.a.          | n.a.           | n.a.        | n.a.           | n.a. | n.a.         | n.a.           | n.a.           | n.a. |
| S9_vs_88847                          | n.a.                            | n.a.      | Overlap (VC_1571/VC_1590)         | n.a. | A   | n.a. | n.a.            | n.a.         | n.a.          | n.a.           | n.a.        | n.a.           | n.a. | n.a.         | n.a.           | n.a.           | n.a. |
| S13_vt_147589                        | n.a.                            | n.a.      | Overlap (VC_1601/VC_1616)         | n.a. | F   | n.a. | n.a.            | n.a.         | n.a.          | n.a.           | n.a.        | n.a.           | n.a. | n.a.         | n.a.           | n.a.           | n.a. |
| S16_vt_173133                        | n.a.                            | n.a.      | Overlap (VC_1601/VC_1616)         | n.a. | F   | n.a. | n.a.            | n.a.         | n.a.          | n.a.           | n.a.        | n.a.           | n.a. | n.a.         | n.a.           | n.a.           | n.a. |
| S5_vs_145633                         | n.a.                            | n.a.      | Overlap (VC_1601/VC_1616)         | n.a. | F   | n.a. | n.a.            | n.a.         | n.a.          | n.a.           | n.a.        | n.a.           | n.a. | n.a.         | n.a.           | n.a.           | n.a. |
| S13_vt_91189                         | n.a.                            | n.a.      | Overlap (VC_1608/VC_1609)         | n.a. | F   | n.a. | n.a.            | n.a.         | n.a.          | n.a.           | n.a.        | n.a.           | n.a. | n.a.         | n.a.           | n.a.           | n.a. |
| S4_vt_16485                          | n.a.                            | n.a.      | Overlap (VC_1608/VC_1609)         | n.a. | F   | n.a. | n.a.            | n.a.         | n.a.          | n.a.           | n.a.        | n.a.           | n.a. | n.a.         | n.a.           | n.a.           | n.a. |
| S5_vs_130294                         | n.a.                            | n.a.      | Overlap (VC_1610/VC_1611)         | n.a. | A   | n.a. | n.a.            | n.a.         | n.a.          | n.a.           | n.a.        | n.a.           | n.a. | n.a.         | n.a.           | n.a.           | n.a. |
| S7_vs_97737                          | n.a.                            | n.a.      | Overlap (VC_1610/VC_1611)         | n.a. | A   | n.a. | n.a.            | n.a.         | n.a.          | n.a.           | n.a.        | n.a.           | n.a. | n.a.         | n.a.           | n.a.           | n.a. |
| S9_vt_50856                          | Streptococcus phage Javan535    | MK448799  | Overlap (VC_262/VC_427)           | n.a. | C1  | 73   | Streptococcus   | Group I      | Duplodnaviria | Heunggongvinae | Uroviricota | Caudoviricetes | n.a. | Unclassified | Unclassified   | O              |      |
| S5_vs_60507                          | Streptococcus phage Javan573    | MK448810  | Overlap (VC_265/VC_330)           | n.a. | C1  | 43   | Streptococcus   | Group I      | Duplodnaviria | Heunggongvinae | Uroviricota | Caudoviricetes | n.a. | Unclassified | Unclassified   | O              |      |
| S5_vs_6478                           | Lactobacillus phage phiad1      | AJ131519  | Overlap (VC_271/VC_315)           | n.a. | C1  | 86   | Lactobacillus   | Group I      | Duplodnaviria | Heunggongvinae | Uroviricota | Caudoviricetes | n.a. | Unclassified | Unclassified   | O              |      |
| S11_vs_13652                         | Streptococcus phage Javan407    | MK448753  | Overlap (VC_326/VC_644)           | n.a. | C7  | 15   | Streptococcus   | Group I      | Duplodnaviria | Heunggongvinae | Uroviricota | Caudoviricetes | n.a. | Unclassified | Unclassified   | O              |      |
| S16_vs_3006                          | Streptococcus phage Javan407    | MK448753  | Overlap (VC_326/VC_644)           | n.a. | C7  | 15   | Streptococcus   | Group I      | Duplodnaviria | Heunggongvinae | Uroviricota | Caudoviricetes | n.a. | Unclassified | Unclassified   | O              |      |
| S5_vs_109085                         | Streptococcus phage Javan407    | MK448753  | Overlap (VC_326/VC_644)           | n.a. | C7  | 11   | Streptococcus   | Group I      | Duplodnaviria | Heunggongvinae | Uroviricota | Caudoviricetes | n.a. | Unclassified | Unclassified   | O              |      |
| S7_vs_23770                          | Streptococcus phage Javan407    | MK448753  | Overlap (VC_326/VC_644)           | n.a. | C7  | 16   | Streptococcus   | Group I      | Duplodnaviria | Heunggongvinae | Uroviricota | Caudoviricetes | n.a. | Unclassified | Unclassified   | O              |      |
| S11_vs_38860                         | n.a.                            | n.a.      | Overlap (VC_333/VC_645)           | n.a. | A   | n.a. | n.a.            | n.a.         | n.a.          | n.a.           | n.a.        | n.a.           | n.a. | n.a.         | n.a.           | n.a.           | n.a. |
| S12_vs_98175                         | Clostridium phage phiCD38-2     | HM568888  | Overlap (VC_333/VC_645)           | n.a. | N24 | 2    | Clostridium     | Group I      | Duplodnaviria | Heunggongvinae | Uroviricota | Caudoviricetes | n.a. | Unclassified | O              | O              |      |
| S14_vs_117153                        | Rosebush phage Jekyll           | LR596902  | Overlap (VC_333/VC_645)           | n.a. | N37 | 3    | Rosebush        | Group I      | Duplodnaviria | Heunggongvinae | Uroviricota | Caudoviricetes | n.a. | Unclassified | O              | O              |      |
| S16_vs_140709                        | n.a.                            | n.a.      | Overlap (VC_333/VC_645)           | n.a. | A   | n.a. | n.a.            | n.a.         | n.a.          | n.a.           | n.a.        | n.a.           | n.a. | n.a.         | n.a.           | n.a.           | n.a. |
| S16_vs_172749                        | Clostridium phage phiCD38-2     | HM568888  | Overlap (VC_333/VC_645)           | n.a. | N34 | 4    | Clostridium     | Group I      | Duplodnaviria | Heunggongvinae | Uroviricota | Caudoviricetes | n.a. | Unclassified | O              | O              |      |
| S4_vt_31682                          | Bacillus phage PBC1             | JQ619704  | Overlap (VC_333/VC_645)           | n.a. | N32 | 3    | Bacillus        | Group I      | Duplodnaviria | Heunggongvinae | Uroviricota | Caudoviricetes | n.a. | Unclassified | O              | O              |      |
| S4_vs_VIRSorter_31916-circular-cat_1 | Clostridium phage phiCD38-2     | HM568888  | Overlap (VC_333/VC_645)           | n.a. | N15 | 6    | Clostridium     | Group I      | Duplodnaviria | Heunggongvinae | Uroviricota | Caudoviricetes | n.a. | Unclassified | O              | O              |      |
| S5_vs_145578                         | Faccaibacterium phage FP_Lugh   | MG711464  | Overlap (VC_333/VC_645)           | n.a. | N9  | 15   | Faccaibacterium | Group I      | Duplodnaviria | Heunggongvinae | Uroviricota | Caudoviricetes | n.a. | Unclassified | O              | O              |      |
| S7_vs_60775                          | Clostridium phage phiCD38-2     | HM568888  | Overlap (VC_333/VC_645)           | n.a. | N33 | 3    | Clostridium     | Group I      | Duplodnaviria | Heunggongvinae | Uroviricota | Caudoviricetes | n.a. | Unclassified | O              | O              |      |
| S10_vs_120570                        | n.a.                            | n.a.      | Overlap (VC_334/VC_1572)          | n.a. | A   | n.a. | n.a.            | n.a.         | n.a.          | n.a.           | n.a.        | n.a.           | n.a. | n.a.         | n.a.           | n.a.           | n.a. |
| S16_vs_107235                        | Solobacterium phage SMO_1P      | MZ503613  | Overlap (VC_334/VC_1572)          | n.a. | C3  | 26   | Solobacterium   | Group I      | Duplodnaviria | Heunggongvinae | Uroviricota | Caudoviricetes | n.a. | Unclassified | Unclassified   | O              |      |
| S5_vs_95307                          | Solobacterium phage SMO_1P      | MZ503613  | Overlap (VC_334/VC_556)           | n.a. | C3  | 26   | Solobacterium   | Group I      | Duplodnaviria | Heunggongvinae | Uroviricota | Caudoviricetes | n.a. | Unclassified | Unclassified   | O              |      |
| S9_vs_48240                          | Solobacterium phage SMO_1P      | MZ503613  | Overlap (VC_334/VC_556)           | n.a. | C3  | 26   | Solobacterium   | Group I      | Duplodnaviria | Heunggongvinae | Uroviricota | Caudoviricetes | n.a. | Unclassified | Unclassified   | O              |      |
| S16_vs_82116                         | Solobacterium phage SMO_1P      | MZ503613  | Overlap (VC_334/VC_556/VC_1037)   | n.a. | C6  | 13   | Solobacterium   | Group I      | Duplodnaviria | Heunggongvinae | Uroviricota | Caudoviricetes | n.a. | Unclassified | Unclassified   | O              |      |
| S4_vt_11308                          | Solobacterium phage SMO_1P      | MZ503613  | Overlap (VC_334/VC_556/VC_1037)   | n.a. | C8  | 15   | Solobacterium   | Group I      | Duplodnaviria | Heunggongvinae | Uroviricota | Caudoviricetes | n.a. | Unclassified | Unclassified   | O              |      |
| S16_vs_132979                        | Faccaibacterium phage FP_Lugh   | MG711464  | Overlap (VC_335/VC_558/VC_559)    | n.a. | N7  | 4    | Faccaibacterium | Group I      | Duplodnaviria | Heunggongvinae | Uroviricota | Caudoviricetes | n.a. | Unclassified | O              | O              |      |
| S6_vs_53966                          | Faccaibacterium phage FP_Lugh   | MG711464  | Overlap (VC_335/VC_558/VC_559)    | n.a. | N5  | 10   | Faccaibacterium | Group I      | Duplodnaviria | Heunggongvinae | Uroviricota | Caudoviricetes | n.a. | Unclassified | O              | O              |      |
| S12_vs_58148                         | Geobacillus phage GBSV1         | DQ340064  | Overlap (VC_346/VC_779)           | n.a. | C3  | 11   | Geobacillus     | Group I      | Duplodnaviria | Heunggongvinae | Uroviricota | Caudoviricetes | n.a. | Unclassified | Unclassified   | O              |      |
| S16_vs_54616                         | Geobacillus phage GBSV1         | DQ340064  | Overlap (VC_346/VC_779)           | n.a. | C3  | 15   | Geobacillus     | Group I      | Duplodnaviria | Heunggongvinae | Uroviricota | Caudoviricetes | n.a. | Unclassified | Unclassified   | O              |      |
| S11_vs_104069                        | Vibrio phage vB_VspS_VS-ABTNL-3 | MR497422  | Overlap (VC_354/VC_1271)          | n.a. | C1  | 11   | Vibrio          | Group I      | Duplodnaviria | Heunggongvinae | Uroviricota | Caudoviricetes | n.a. | Unclassified | Unclassified   | O              |      |
| S15_vs_39804                         | Bacillus phage vB_Bs_BMBtp13    | KX190832  | Overlap (VC_433/VC_668)           | n.a. | N2  | 18   | Bacillus        | Group I      | Duplodnaviria | Heunggongvinae | Uroviricota | Caudoviricetes | n.a. | Unclassified | O              | O              |      |
| S3_vs_20315                          | Bacillus phage vB_Bs_BMBtp13    | KX190832  | Overlap (VC_433/VC_668)           | n.a. | N2  | 21   | Bacillus        | Group I      | Duplodnaviria | Heunggongvinae | Uroviricota | Caudoviricetes | n.a. | Unclassified | O              | O              |      |
| S2_vt_13353                          | uncultured phage crf_1          | MT774401  | Overlap (VC_520/VC_522)           | n.a. | C5  | 282  | Unspecified     | Group I      | Duplodnaviria | Heunggongvinae | Uroviricota | Caudoviricetes | n.a. | Unclassified | O              | O              |      |
| S4_vt_31825                          | uncultured phage crf_1          | MT774401  | Overlap (VC_520/VC_522)           | n.a. | C5  | 216  | Unspecified     | Group I      | Duplodnaviria | Heunggongvinae | Uroviricota | Caudoviricetes | n.a. | Unclassified | O              | O              |      |
| S8_vt_49282                          | uncultured phage crf_1          | MT774401  | Overlap (VC_520/VC_522)           | n.a. | C5  | 188  | Unspecified     | Group I      | Duplodnaviria | Heunggongvinae | Uroviricota | Caudoviricetes | n.a. | Unclassified | O              | O              |      |
| S10_vs_46819                         | Faccaibacterium phage FP_Lugh   | MG711464  | Overlap (VC_558/VC_559)           | n.a. | N12 | 10   | Faccaibacterium | Group I      | Duplodnaviria | Heunggongvinae | Uroviricota | Caudoviricetes | n.a. | Unclassified | O              | O              |      |
| S4_vs_VIRSorter_27316-cat_2          | Faccaibacterium phage FP_Lugh   | MG711464  | Overlap (VC_558/VC_559)           | n.a. | N2  | 46   | Faccaibacterium | Group I      | Duplodnaviria | Heunggongvinae | Uroviricota | Caudoviricetes | n.a. | Unclassified | O              | O              |      |
| S6_vs_1146                           | Streptococcus phage Javan240    | MK448881  | Overlap (VC_558/VC_559)           | n.a. | N13 | 5    | Streptococcus   | Group I      | Duplodnaviria | Heunggongvinae | Uroviricota | Caudoviricetes | n.a. | Unclassified | O              | O              |      |
| S14_vt_85122                         | Clostridium phage vB_Cpex-1181  | MW478292  | Overlap (VC_563/VC_842/VC_924)    | n.a. | C4  | 25   | Clostridium     | Group I      | Duplodnaviria | Heunggongvinae | Uroviricota | Caudoviricetes | n.a. | Unclassified | Unclassified   | O              |      |
| S5_vt_145583                         | Clostridium phage vB_Cpex-1181  | MW478292  | Overlap (VC_563/VC_842/VC_924)    | n.a. | C4  | 7    | Clostridium     | Group I      | Duplodnaviria | Heunggongvinae | Uroviricota | Caudoviricetes | n.a. | Unclassified | Unclassified   | O              |      |
| S10_vt_46328                         | Rosebush phage Jekyll           | LR596902  | Overlap (VC_627/VC_1564)          | n.a. | N19 | 7    | Rosebush        | Group I      | Duplodnaviria | Heunggongvinae | Uroviricota | Caudoviricetes | n.a. | Unclassified | O              | O              |      |
| S11_vt_34008                         | Rosebush phage Jekyll           | LR596902  | Overlap (VC_627/VC_1564)          | n.a. | N18 | 3    | Rosebush        | Group I      | Duplodnaviria | Heunggongvinae | Uroviricota | Caudoviricetes | n.a. | Unclassified | O              | O              |      |
| S11_vs_82368                         | Rosebush phage Jekyll           | LR596902  | Overlap (VC_627/VC_1564)          | n.a. | N15 | 10   | Rosebush        | Group I      | Duplodnaviria | Heunggongvinae | Uroviricota | Caudoviricetes | n.a. | Unclassified | O              | O              |      |
| S3_vt_11428                          | Rosebush phage Jekyll           | LR596902  | Overlap (VC_627/VC_1564)          | n.a. | N13 | 17   | Rosebush        | Group I      | Duplodnaviria | Heunggongvinae | Uroviricota | Caudoviricetes | n.a. | Unclassified | O              | O              |      |
| S4_vt_13353                          | Rosebush phage Jekyll           | LR596902  | Overlap (VC_627/VC_1564)          | n.a. | N12 | 23   | Rosebush        | Group I      | Duplodnaviria | Heunggongvinae | Uroviricota | Caudoviricetes | n.a. | Unclassified | O              | O              |      |
| S5_vt_105728                         | Rosebush phage Jekyll           | LR596902  | Overlap (VC_627/VC_1564)          | n.a. | N16 | 16   | Rosebush        | Group I      | Duplodnaviria | Heunggongvinae | Uroviricota | Caudoviricetes | n.a. | Unclassified | O              | O              |      |
| S5_vt_145604                         | Rosebush phage Jekyll           | LR596902  | Overlap (VC_627/VC_1564)          | n.a. | N14 | 18   | Rosebush        | Group I      | Duplodnaviria | Heunggongvinae | Uroviricota | Caudoviricetes | n.a. | Unclassified | O              | O              |      |
| S5_vs_68254                          | Rosebush phage Jekyll           | LR596902  | Overlap (VC_627/VC_1564)          | n.a. | N18 | 7    | Rosebush        | Group I      | Duplodnaviria | Heunggongvinae | Uroviricota | Caudoviricetes | n.a. | Unclassified | O              | O              |      |
| S7_vt_49485                          | Rosebush phage Jekyll           | LR596902  | Overlap (VC_627/VC_1564)          | n.a. | N13 | 7    | Rosebush        | Group I      | Duplodnaviria | Heunggongvinae | Uroviricota | Caudoviricetes | n.a. | Unclassified | O              | O              |      |
| S7_vs_65719                          | Rosebush phage Jekyll           | LR596902  | Overlap (VC_627/VC_1564)          | n.a. | N27 | 2    | Rosebush        | Group I      | Duplodnaviria | Heunggongvinae | Uroviricota | Caudoviricetes | n.a. | Unclassified | O              | O              |      |
| S9_vs_90848                          | Rosebush phage Jekyll           | LR596902  | Overlap (VC_627/VC_1564)          | n.a. | N16 | 9    | Rosebush        | Group I      | Duplodnaviria | Heunggongvinae | Uroviricota | Caudoviricetes | n.a. | Unclassified | O              | O              |      |
| S11_vs_83666                         | Faccaibacterium phage FP_Lugh   | MG711464  | Overlap (VC_641/VC_1595)          | n.a. | N5  | 20   | Faccaibacterium | Group I      | Duplodnaviria | Heunggongvinae | Uroviricota | Caudoviricetes | n.a. | Unclassified | O              | O              |      |
| S14_vs_56251                         | Clostridium phage phiCD38-2     | HM568888  | Overlap (VC_641/VC_1595)          | n.a. | N13 | 4    | Clostridium     | Group I      | Duplodnaviria | Heunggongvinae | Uroviricota | Caudoviricetes | n.a. | Unclassified | O              | O              |      |
| S4_vs_VIRSorter_21643-cat_2          | Faccaibacterium phage FP_Lugh   | MG711464  | Overlap (VC_641/VC_1595)          | n.a. | N3  | 21   | Faccaibacterium | Group I      | Duplodnaviria | Heunggongvinae | Uroviricota | Caudoviricetes | n.a. | Unclassified | O              | O              |      |
| S6_vs_56485                          | Faccaibacterium phage FP_Lugh   | MG711464  | Overlap (VC_641/VC_925)           | n.a. | N18 | 3    | Faccaibacterium | Group I      | Duplodnaviria | Heunggongvinae | Uroviricota | Caudoviricetes | n.a. | Unclassified | O              | O              |      |
| S9_vs_37437                          | Clostridium phage phiCD111      | LN681535  | Overlap (VC_641/VC_925)           | n.a. | N12 | 5    | Clostridium     | Group I      | Duplodnaviria | Heunggongvinae | Uroviricota | Caudoviricetes | n.a. | Unclassified | O              | O              |      |
| S14_vs_112252                        | n.a.                            | n.a.      | Overlap (VC_660/VC_734)           | n.a. | A   | n.a. | n.a.            | n.a.         | n.a.          | n.a.           | n.a.        | n.a.           | n.a. | n.a.         | n.a.           | n.a.           | n.a. |
| S5_vs_49011                          | Clostridium phage phiCT19406B   | KX098331  | Overlap (VC_660/VC_734)           | n.a. | N9  | 49   | Clostridium     | Group I      | Duplodnaviria | Heunggongvinae | Uroviricota | Caudoviricetes | n.a. | Unclassified | O              | O              |      |
| S7_vt_31654                          | Bacillus phage vB_Bs_BMBtp13    | KX190832  | Overlap (VC_668/VC_907)           | n.a. | N12 | 7    | Bacillus        | Group I      | Duplodnaviria | Heunggongvinae | Uroviricota | Caudoviricetes | n.a. | Unclassified | O              | O              |      |
| S7_vt_8332                           | Bacillus phage vB_Bs_BMBtp13    | KX190832  | Overlap (VC_668/VC_907)           | n.a. | N9  | 8    | Bacillus        | Group I      | Duplodnaviria | Heunggongvinae | Uroviricota | Caudoviricetes | n.a. | Unclassified | O              | O              |      |
| S13_vt_3728                          | Bacteroides phage crAss002      | MN0917146 | Overlap (VC_692/VC_693)           | n.a. | C1  | 233  | Bacteroides     | Group I      | Duplodnaviria | Heunggongvinae | Uroviricota | Caudoviricetes | n.a. | Unclassified | Intestiviridae | Chuvirivirinae | O    |
| S16_vt_173095                        | Bacteroides phage crAss002      | MN0917146 | Overlap (VC_692/VC_693)           | n.a. | C1  | 184  |                 |              |               |                |             |                |      |              |                |                |      |

[illegible]

[illegible]



Table S6-2. WMS\_HQ\_vOTUs\_taxonomies

| Scaffold                | Cloner                             | Accession | Status    | VC        | Level | Weight | Host             | BaltimoreGroup | Realm         | Kingdom       | Phylum       | Class              | Order        | Family       | Subfamily    | Genus            |
|-------------------------|------------------------------------|-----------|-----------|-----------|-------|--------|------------------|----------------|---------------|---------------|--------------|--------------------|--------------|--------------|--------------|------------------|
| S1-wms-combined_107073  | Burkholderia phage BcepM6          | AY539836  | Clustered | VC_610_0  | N4    | 5      | Burkholderia     | Group I        | Duplodnaviria | Heunggongvime | Uroviricota  | Caudoviricetes     | n.a.         | Unclassified | O            | O                |
| S1-wms-combined_118167  | Clostridium phage phiMMP02         | JX145341  | Clustered | VC_825_0  | N11   | 2      | Clostridium      | Group I        | Duplodnaviria | Heunggongvime | Uroviricota  | Caudoviricetes     | n.a.         | Unclassified | O            | O                |
| S1-wms-combined_120533  | n.a.                               | n.a.      | Clustered | VC_1481_0 | F     | n.a.   | n.a.             | n.a.           | n.a.          | n.a.          | n.a.         | n.a.               | n.a.         | n.a.         | n.a.         | n.a.             |
| S1-wms-combined_132934  | Faecalibacterium phage FP_Epona    | MG711462  | Clustered | VC_707_0  | N10   | 46     | Faecalibacterium | Group I        | Duplodnaviria | Heunggongvime | Uroviricota  | Caudoviricetes     | n.a.         | Unclassified | O            | O                |
| S1-wms-combined_151708  | n.a.                               | n.a.      | Clustered | VC_1484_0 | A     | n.a.   | n.a.             | n.a.           | n.a.          | n.a.          | n.a.         | n.a.               | n.a.         | n.a.         | n.a.         | n.a.             |
| S1-wms-combined_156637  | n.a.                               | n.a.      | Clustered | VC_1487_0 | F     | n.a.   | n.a.             | n.a.           | n.a.          | n.a.          | n.a.         | n.a.               | n.a.         | n.a.         | n.a.         | n.a.             |
| S1-wms-combined_159544  | Pseudomonas phage phi3             | KT887559  | Clustered | VC_5_0    | C2    | 32     | Pseudomonas      | Group I        | Duplodnaviria | Heunggongvime | Uroviricota  | Caudoviricetes     | n.a.         | Peduviridae  | Unclassified | Phitrevirus      |
| S1-wms-combined_164485  | n.a.                               | n.a.      | Clustered | VC_1484_0 | A     | n.a.   | n.a.             | n.a.           | n.a.          | n.a.          | n.a.         | n.a.               | n.a.         | n.a.         | n.a.         | n.a.             |
| S1-wms-combined_169879  | Bacillus phage BalMu-1             | KP063902  | Clustered | VC_825_0  | N9    | 12     | Bacillus         | Group I        | Duplodnaviria | Heunggongvime | Uroviricota  | Caudoviricetes     | n.a.         | Unclassified | O            | O                |
| S1-wms-combined_185336  | n.a.                               | n.a.      | Clustered | VC_1491_0 | F     | n.a.   | n.a.             | n.a.           | n.a.          | n.a.          | n.a.         | n.a.               | n.a.         | n.a.         | n.a.         | n.a.             |
| S1-wms-combined_19031   | Mannheimia phage vB_MhM_3927AP2    | KP137440  | Clustered | VC_181_0  | C1    | 48     | Mannheimia       | Group I        | Duplodnaviria | Heunggongvime | Uroviricota  | Caudoviricetes     | n.a.         | Unclassified | Unclassified | Unclassified     |
| S1-wms-combined_197401  | n.a.                               | n.a.      | Clustered | VC_1408_0 | A     | n.a.   | n.a.             | n.a.           | n.a.          | n.a.          | n.a.         | n.a.               | n.a.         | n.a.         | n.a.         | n.a.             |
| S1-wms-combined_224578  | Rosebunia phage Jekyll             | LR596902  | Clustered | VC_418_0  | C5    | 9      | Rosebunia        | Group I        | Duplodnaviria | Heunggongvime | Uroviricota  | Caudoviricetes     | n.a.         | Unclassified | Unclassified | Unclassified     |
| S1-wms-combined_23248   | Faecalibacterium phage FP_Lugh     | MG711464  | Clustered | VC_621_0  | C2    | 71     | Faecalibacterium | Group I        | Duplodnaviria | Heunggongvime | Uroviricota  | Caudoviricetes     | n.a.         | Unclassified | Unclassified | Lughvirus        |
| S1-wms-combined_246923  | Flavobacterium phage IF4           | MN850656  | Clustered | VC_679_0  | N12   | 13     | Flavobacterium   | Group I        | Duplodnaviria | Heunggongvime | Uroviricota  | Caudoviricetes     | n.a.         | Unclassified | O            | O                |
| S1-wms-combined_246922  | n.a.                               | n.a.      | Clustered | VC_1494_0 | F     | n.a.   | n.a.             | n.a.           | n.a.          | n.a.          | n.a.         | n.a.               | n.a.         | n.a.         | n.a.         | n.a.             |
| S1-wms-combined_263562  | n.a.                               | n.a.      | Clustered | VC_1437_0 | A     | n.a.   | n.a.             | n.a.           | n.a.          | n.a.          | n.a.         | n.a.               | n.a.         | n.a.         | n.a.         | n.a.             |
| S1-wms-combined_302166  | Faecalibacterium phage FP_Lagaffe  | MG711461  | Clustered | VC_715_0  | N8    | 11     | Faecalibacterium | Group I        | Duplodnaviria | Heunggongvime | Uroviricota  | Caudoviricetes     | n.a.         | Unclassified | O            | O                |
| S1-wms-combined_304377  | Faecalibacterium phage FP_oengus   | MG711463  | Clustered | VC_804_0  | C1    | 134    | Faecalibacterium | Group I        | Duplodnaviria | Heunggongvime | Uroviricota  | Caudoviricetes     | n.a.         | Unclassified | Unclassified | Oengusvirus      |
| S1-wms-combined_307323  | Bifidobacterium phage PMBT6        | MH44512   | Clustered | VC_798_0  | N3    | 41     | Bifidobacterium  | Group I        | Duplodnaviria | Heunggongvime | Uroviricota  | Caudoviricetes     | n.a.         | Unclassified | O            | O                |
| S1-wms-combined_313851  | n.a.                               | n.a.      | Clustered | VC_1496_0 | F     | n.a.   | n.a.             | n.a.           | n.a.          | n.a.          | n.a.         | n.a.               | n.a.         | n.a.         | n.a.         | n.a.             |
| S1-wms-combined_324053  | Myoviridae sp.                     | MW202455  | Clustered | VC_427_0  | C1    | 7      | Unspecified      | Group I        | Duplodnaviria | Heunggongvime | Uroviricota  | Caudoviricetes     | n.a.         | Unclassified | Unclassified | Unclassified     |
| S1-wms-combined_331544  | n.a.                               | n.a.      | Clustered | VC_1497_0 | F     | n.a.   | n.a.             | n.a.           | n.a.          | n.a.          | n.a.         | n.a.               | n.a.         | n.a.         | n.a.         | n.a.             |
| S1-wms-combined_331896  | n.a.                               | n.a.      | Clustered | VC_1481_0 | F     | n.a.   | n.a.             | n.a.           | n.a.          | n.a.          | n.a.         | n.a.               | n.a.         | n.a.         | n.a.         | n.a.             |
| S1-wms-combined_332236  | Streptococcus phage Javan630       | MK448997  | Clustered | VC_626_0  | C5    | 55     | Streptococcus    | Group I        | Duplodnaviria | Heunggongvime | Uroviricota  | Caudoviricetes     | n.a.         | Unclassified | Unclassified | Unclassified     |
| S1-wms-combined_340558  | Flavobacterium phage IF4           | MN850656  | Clustered | VC_679_0  | N18   | 4      | Flavobacterium   | Group I        | Duplodnaviria | Heunggongvime | Uroviricota  | Caudoviricetes     | n.a.         | Unclassified | O            | O                |
| S1-wms-combined_353757  | Clostridium phage phiCT19406B      | KM983331  | Clustered | VC_650_0  | N16   | 7      | Clostridium      | Group I        | Duplodnaviria | Heunggongvime | Uroviricota  | Caudoviricetes     | n.a.         | Unclassified | O            | O                |
| S1-wms-combined_354899  | n.a.                               | n.a.      | Clustered | VC_1498_0 | F     | n.a.   | n.a.             | n.a.           | n.a.          | n.a.          | n.a.         | n.a.               | n.a.         | n.a.         | n.a.         | n.a.             |
| S1-wms-combined_357373  | Tortoise microvirus 19             | MK765569  | Clustered | VC_1243_0 | C1    | 9      | Unspecified      | Group II       | Monodnaviria  | Sangervirae   | Phixviricota | Malgrandaviricetes | Petitvirales | Microviridae | Unclassified | Unclassified     |
| S1-wms-combined_360285  | Exiguobacterium phage vB_EalM-137  | MH884510  | Clustered | VC_716_0  | N2    | 13     | Exiguobacterium  | Group I        | Duplodnaviria | Heunggongvime | Uroviricota  | Caudoviricetes     | n.a.         | Unclassified | O            | O                |
| S1-wms-combined_394574  | Panbacterioides phage PDS1         | MN929097  | Clustered | VC_831_0  | C1    | 164    | Panbacterioides  | Group I        | Duplodnaviria | Heunggongvime | Uroviricota  | Caudoviricetes     | n.a.         | Unclassified | Unclassified | Unclassified     |
| S1-wms-combined_394628  | n.a.                               | n.a.      | Clustered | VC_1500_0 | F     | n.a.   | n.a.             | n.a.           | n.a.          | n.a.          | n.a.         | n.a.               | n.a.         | n.a.         | n.a.         | n.a.             |
| S1-wms-combined_40115   | n.a.                               | n.a.      | Clustered | VC_1491_0 | F     | n.a.   | n.a.             | n.a.           | n.a.          | n.a.          | n.a.         | n.a.               | n.a.         | n.a.         | n.a.         | n.a.             |
| S1-wms-combined_41369   | Rosebunia phage Jekyll             | LR596902  | Clustered | VC_418_0  | N12   | 5      | Rosebunia        | Group I        | Duplodnaviria | Heunggongvime | Uroviricota  | Caudoviricetes     | n.a.         | Unclassified | O            | O                |
| S1-wms-combined_52643   | Bacteroides phage p00              | BK010646  | Clustered | VC_677_0  | N6    | 14     | Bacteroides      | Group I        | Duplodnaviria | Heunggongvime | Uroviricota  | Caudoviricetes     | n.a.         | Unclassified | O            | O                |
| S1-wms-combined_68998   | Faecalibacterium phage FP_Taraxis  | MG711467  | Clustered | VC_711_0  | C1    | 223    | Faecalibacterium | Group I        | Duplodnaviria | Heunggongvime | Uroviricota  | Caudoviricetes     | n.a.         | Unclassified | Unclassified | Tarnisvirus      |
| S1-wms-combined_72167   | Listeria phage LWP01               | CP011103  | Clustered | VC_420_0  | N10   | 3      | Listeria         | Group I        | Duplodnaviria | Heunggongvime | Uroviricota  | Caudoviricetes     | n.a.         | Unclassified | O            | O                |
| S1-wms_100010           | n.a.                               | n.a.      | Clustered | VC_1492_0 | A     | n.a.   | n.a.             | n.a.           | n.a.          | n.a.          | n.a.         | n.a.               | n.a.         | n.a.         | n.a.         | n.a.             |
| S1-wms_130214           | Butyrivibrio virus Ceridwen        | MN882553  | Clustered | VC_1209_0 | N11   | 6      | Butyrivibrio     | Group I        | Duplodnaviria | Heunggongvime | Uroviricota  | Caudoviricetes     | n.a.         | Unclassified | O            | O                |
| S1-wms_170115           | Clostridium phage phiCD38-2        | HM568888  | Clustered | VC_627_0  | N9    | 6      | Clostridium      | Group I        | Duplodnaviria | Heunggongvime | Uroviricota  | Caudoviricetes     | n.a.         | Unclassified | O            | O                |
| S1-wms_185046           | n.a.                               | n.a.      | Clustered | VC_1239_0 | A     | n.a.   | n.a.             | n.a.           | n.a.          | n.a.          | n.a.         | n.a.               | n.a.         | n.a.         | n.a.         | n.a.             |
| S1-wms_212940           | Faecalibacterium phage FP_oengus   | MG711463  | Clustered | VC_804_2  | N10   | 46     | Faecalibacterium | Group I        | Duplodnaviria | Heunggongvime | Uroviricota  | Caudoviricetes     | n.a.         | Unclassified | O            | O                |
| S1-wms_225995           | n.a.                               | n.a.      | Clustered | VC_1492_0 | A     | n.a.   | n.a.             | n.a.           | n.a.          | n.a.          | n.a.         | n.a.               | n.a.         | n.a.         | n.a.         | n.a.             |
| S1-wms_244836           | n.a.                               | n.a.      | Clustered | VC_1473_0 | A     | n.a.   | n.a.             | n.a.           | n.a.          | n.a.          | n.a.         | n.a.               | n.a.         | n.a.         | n.a.         | n.a.             |
| S1-wms_296850           | Faecalibacterium phage FP_Toutatis | MG711466  | Clustered | VC_710_0  | C6    | 68     | Faecalibacterium | Group I        | Duplodnaviria | Heunggongvime | Uroviricota  | Caudoviricetes     | n.a.         | Unclassified | Unclassified | Toutatisvirus    |
| S1-wms_313991           | n.a.                               | n.a.      | Clustered | VC_1496_0 | F     | n.a.   | n.a.             | n.a.           | n.a.          | n.a.          | n.a.         | n.a.               | n.a.         | n.a.         | n.a.         | n.a.             |
| S1-wms_4277             | Faecalibacterium phage FP_Mushu    | MG711460  | Clustered | VC_1235_0 | C5    | 126    | Faecalibacterium | Group I        | Duplodnaviria | Heunggongvime | Uroviricota  | Caudoviricetes     | n.a.         | Unclassified | Unclassified | Mushuvirus       |
| S11-wms-combined_119215 | Clostridium phage phiCT453B        | KM983328  | Clustered | VC_650_0  | N16   | 3      | Clostridium      | Group I        | Duplodnaviria | Heunggongvime | Uroviricota  | Caudoviricetes     | n.a.         | Unclassified | O            | O                |
| S11-wms-combined_125176 | Campylobacter phage PC10           | MZ047271  | Clustered | VC_1456_0 | N7    | 6      | Campylobacter    | Group I        | Duplodnaviria | Heunggongvime | Uroviricota  | Caudoviricetes     | n.a.         | Unclassified | O            | O                |
| S11-wms-combined_140099 | Faecalibacterium phage FP_Lugh     | MG711464  | Clustered | VC_621_0  | C1    | 94     | Faecalibacterium | Group I        | Duplodnaviria | Heunggongvime | Uroviricota  | Caudoviricetes     | n.a.         | Unclassified | Unclassified | Lughvirus        |
| S11-wms-combined_154845 | Escherichia phage ESS12_e015       | LR597649  | Clustered | VC_5_0    | C1    | 105    | Escherichia      | Group I        | Duplodnaviria | Heunggongvime | Uroviricota  | Caudoviricetes     | n.a.         | Peduviridae  | Unclassified | Quadrangulavirus |
| S11-wms-combined_17029  | n.a.                               | n.a.      | Clustered | VC_1502_0 | A     | n.a.   | n.a.             | n.a.           | n.a.          | n.a.          | n.a.         | n.a.               | n.a.         | n.a.         | n.a.         | n.a.             |
| S11-wms-combined_172889 | Flavobacterium phage IF4           | MN850656  | Clustered | VC_679_0  | N17   | 7      | Flavobacterium   | Group I        | Duplodnaviria | Heunggongvime | Uroviricota  | Caudoviricetes     | n.a.         | Unclassified | O            | O                |
| S11-wms-combined_193148 | n.a.                               | n.a.      | Clustered | VC_616_0  | A     | n.a.   | n.a.             | n.a.           | n.a.          | n.a.          | n.a.         | n.a.               | n.a.         | n.a.         | n.a.         | n.a.             |
| S11-wms-combined_194205 | Streptococcus phage Javan630       | MK448997  | Clustered | VC_626_0  | C3    | 66     | Streptococcus    | Group I        | Duplodnaviria | Heunggongvime | Uroviricota  | Caudoviricetes     | n.a.         | Unclassified | Unclassified | Unclassified     |
| S11-wms-combined_195425 | Bacteroides phage p00              | BK010646  | Clustered | VC_677_0  | C2    | 65     | Bacteroides      | Group I        | Duplodnaviria | Heunggongvime | Uroviricota  | Caudoviricetes     | n.a.         | Unclassified | Unclassified | Unclassified     |
| S11-wms-combined_198512 | Rosebunia phage Shimadzu           | LR596903  | Clustered | VC_715_0  | N3    | 5      | Rosebunia        | Group I        | Duplodnaviria | Heunggongvime | Uroviricota  | Caudoviricetes     | n.a.         | Unclassified | O            | O                |
| S11-wms-combined_200084 | Bacillus phage BalMu-1             | KP063902  | Clustered | VC_825_0  | N10   | 6      | Bacillus         | Group I        | Duplodnaviria | Heunggongvime | Uroviricota  | Caudoviricetes     | n.a.         | Unclassified | O            | O                |
| S11-wms-combined_204522 | Burkholderia phage BcepC6B         | AY605181  | Clustered | VC_616_0  | N3    | 1      | Burkholderia     | Group I        | Duplodnaviria | Heunggongvime | Uroviricota  | Caudoviricetes     | n.a.         | Unclassified | O            | O                |
| S11-wms-combined_217790 | n.a.                               | n.a.      | Clustered | VC_1503_0 | A     | n.a.   | n.a.             | n.a.           | n.a.          | n.a.          | n.a.         | n.a.               | n.a.         | n.a.         | n.a.         | n.a.             |
| S11-wms-combined_221310 | n.a.                               | n.a.      | Clustered | VC_1504_0 | A     | n.a.   | n.a.             | n.a.           | n.a.          | n.a.          | n.a.         | n.a.               | n.a.         | n.a.         | n.a.         | n.a.             |
| S11-wms-combined_268967 | Mannheimia phage vB_MhM_3927AP2    | KP137440  | Clustered | VC_181_0  | C2    | 23     | Mannheimia       | Group I        | Duplodnaviria | Heunggongvime | Uroviricota  | Caudoviricetes     | n.a.         | Unclassified | Unclassified | Unclassified     |
| S11-wms-combined_283220 | Faecalibacterium phage FP_Mushu    | MG711460  | Clustered | VC_1235_0 | C1    | 160    | Faecalibacterium | Group I        | Duplodnaviria | Heunggongvime | Uroviricota  | Caudoviricetes     | n.a.         | Unclassified | Unclassified | Mushuvirus       |
| S11-wms-combined_299954 | n.a.                               | n.a.      | Clustered | VC_650_0  | A     | n.a.   | n.a.             | n.a.           | n.a.          | n.a.          | n.a.         | n.a.               | n.a.         | n.a.         | n.a.         | n.a.             |
| S11-wms-combined_304239 | Faecalibacterium phage FP_Epona    | MG711462  | Clustered | VC_707_0  | N10   | 51     | Faecalibacterium | Group I        | Duplodnaviria | Heunggongvime | Uroviricota  | Caudoviricetes     | n.a.         | Unclassified | O            | O                |
| S11-wms-combined_41367  | n.a.                               | n.a.      | Clustered | VC_1505_0 | A     | n.a.   | n.a.             | n.a.           | n.a.          | n.a.          | n.a.         | n.a.               | n.a.         | n.a.         | n.a.         | n.a.             |
| S11-wms-combined_46816  | n.a.                               | n.a.      | Clustered | VC_893_0  | A     | n.a.   | n.a.             | n.a.           | n.a.          | n.a.          | n.a.         | n.a.               | n.a.         | n.a.         | n.a.         | n.a.             |
| S11-wms-combined_48246  | Phage vB_RanS_PIN03                | ON245412  | Clustered | VC_917_0  | N10   | 5      | Unspecified      | Group I        | Duplodnaviria | Heunggongvime | Uroviricota  | Caudoviricetes     | n.a.         | Unclassified | O            | O                |
| S11-wms-combined_49632  | Clostridium phage phiCT453B        | KM983328  | Clustered | VC_650_0  | N12   | 10     | Clostridium      | Group I        | Duplodnaviria | Heunggongvime | Uroviricota  | Caudoviricetes     | n.a.         | Unclassified | O            | O                |
| S11-wms-combined_58538  | Deep-sea thermophilic phage D6E    | GU568037  | Clustered | VC_271_0  | N9    | 2      | Unspecified      | Group I        | Duplodnaviria | Heunggongvime | Uroviricota  | Caudoviricetes     | n.a.         | Unclassified | O            | O                |
| S11-wms-combined_73204  | n.a.                               | n.a.      | Clustered | VC_1397_0 | A     | n.a.   | n.a.             | n.a.           | n.a.          | n.a.          | n.a.         | n.a.               | n.a.         | n.a.         | n.a.         | n.a.             |
| S11-wms-combined_74983  | Faecalibacterium phage FP_Toutatis | MG711466  | Clustered | VC_710_0  | C6    | 71     | Faecalibacterium | Group I        | Duplodnaviria | Heunggongvime | Uroviricota  | Caudoviricetes     | n.a.         | Unclassified | Unclassified | Toutatisvirus    |
| S11-wms-combined_83571  | Winogradskyella phage Petemella_1  | MT732475  | Clustered | VC_676_1  | N12   | 19     | Winogradskyella  | Group I        | Duplodnaviria | Heunggongvime | Uroviricota  | Caudoviricetes     | n.a.         | Winoviridae  | O            | O                |
| S11-wms-combined_84326  | Escherichia phage vB_EcoM-613R2    | ON470591  | Clustered | VC_716_0  | N2    | 12     | Escherichia      | Group I        | Duplodnaviria | Heunggongvime | Uroviricota  | Caudoviricetes     | n.a.         | Unclassified | O            | O                |
| S11-wms-combined_92114  | n.a.                               | n.a.      | Clustered | VC_1014_0 | A     | n.a.   | n.a.             | n.a.           | n.a.          | n.a.          | n.a.         | n.a.               | n.a.         | n.a.         | n.a.         | n.a.             |
| S11-wms_14390           | n.a.                               | n.a.      | Clustered | VC_271_0  | A     | n.a.   | n.a.             | n.a.           | n.a.          | n.a.          | n.a.         | n.a.               | n.a.         | n.a.         | n.a.         | n.a.             |
| S11-wms_303398          | n.a.                               | n.a.      | Clustered | VC_1239_0 | A     | n.a.   | n.a.             | n.a.           | n.a.          | n.a.          | n.a.         | n.a.               | n.a.         | n.a.         | n.a.         | n.a.             |
| S11-wms_3116            | Faecalibacterium phage FP_Mushu    | MG711460  | Clustered | VC_1235_0 | C2    | 142    | Faecalibacterium | Group I        | Duplodnaviria | Heunggongvime | Uroviricota  | Caudoviricetes     | n.a.         | Unclassified | Unclassified | Mushuvirus       |
| S11-wms_320555          | Phage vB_RanS_PIN03                | ON245412  | Clustered | VC_918_0  | N5    | 9      | Unspecified      | Group I        | Duplodnaviria | Heunggongvime | Uroviricota  | Caudoviricetes     | n.a.         | Unclassified | O            | O                |
| S11-wms_330479          | Elizabethkingia phage TCUEAP1      | MN732896  | Clustered | VC_1010_0 | C1    | 8      | Elizabethkingia  | Unclassified   | Unclassified  | n.a.          | n.a.         | n.a.               | n.a.         | Unclassified | Unclassified | Unclassified     |
| S11-wms_55610           | Faecalibacterium phage FP_Bright   | MG711465  | Clustered | VC_606_0  | C2    | 149    | Faecalibacterium | Group I        | Duplodnaviria | Heunggongvime | Uroviricota  | Caudoviricetes     | n.a.         | Unclassified | Unclassified | Brightvirus      |
| S12-wms-combined_107942 | Bifidobacterium phage BitterVaud1  | MT006236  | Clustered | VC_804_2  | N5    | 34     | Bifidobacterium  | Group I        | Duplodnaviria |               |              |                    |              |              |              |                  |

|                         |                                    |          |           |           |     |      |                  |          |               |                |              |                   |                |              |               |                |
|-------------------------|------------------------------------|----------|-----------|-----------|-----|------|------------------|----------|---------------|----------------|--------------|-------------------|----------------|--------------|---------------|----------------|
| S12-wms-combined_129554 | Faecalibacterium phage FP_Epona    | MG711462 | Clustered | VC_707_1  | C3  | 50   | Faecalibacterium | Group I  | Duplodnaviria | Heunggongvinae | Uroviricota  | Caudoviricetes    | n.a.           | Unclassified | Unclassified  | Eponavirus     |
| S12-wms-combined_147628 | Faecalibacterium phage FP_Taranis  | MG711467 | Clustered | VC_1238_0 | N1  | 24   | Faecalibacterium | Group I  | Duplodnaviria | Heunggongvinae | Uroviricota  | Caudoviricetes    | n.a.           | Unclassified | O             | O              |
| S12-wms-combined_156234 | Faecalibacterium phage FP_Toutatis | MG711466 | Clustered | VC_710_0  | C8  | 49   | Faecalibacterium | Group I  | Duplodnaviria | Heunggongvinae | Uroviricota  | Caudoviricetes    | n.a.           | Unclassified | Unclassified  | Toutatisvirus  |
| S12-wms-combined_168259 | Akkermansia phage DTMo-2021a       | CP084202 | Clustered | VC_736_0  | N1  | 13   | Akkermansia      | Group I  | Duplodnaviria | Heunggongvinae | Uroviricota  | Caudoviricetes    | n.a.           | Unclassified | O             | O              |
| S12-wms-combined_17617  | Faecalibacterium phage FP_Epona    | MG711462 | Clustered | VC_707_0  | N8  | 53   | Faecalibacterium | Group I  | Duplodnaviria | Heunggongvinae | Uroviricota  | Caudoviricetes    | n.a.           | Unclassified | O             | O              |
| S12-wms-combined_18287  | Faecalibacterium phage FP_Epona    | MG711462 | Clustered | VC_707_0  | N10 | 42   | Faecalibacterium | Group I  | Duplodnaviria | Heunggongvinae | Uroviricota  | Caudoviricetes    | n.a.           | Unclassified | O             | O              |
| S12-wms-combined_191570 | Clostridium phage phiCT453A        | KM983327 | Clustered | VC_732_0  | N4  | 9    | Clostridium      | Group I  | Duplodnaviria | Heunggongvinae | Uroviricota  | Caudoviricetes    | n.a.           | Unclassified | O             | O              |
| S12-wms-combined_210942 | n.a.                               | n.a.     | Clustered | VC_1487_0 | F   | n.a. | n.a.             | n.a.     | n.a.          | n.a.           | n.a.         | n.a.              | n.a.           | n.a.         | n.a.          | n.a.           |
| S12-wms-combined_2450   | Winogradskyella phage Petemella_1  | MT732475 | Clustered | VC_676_0  | N7  | 19   | Winogradskyella  | Group I  | Duplodnaviria | Heunggongvinae | Uroviricota  | Caudoviricetes    | n.a.           | n.a.         | Winoviridae   | O              |
| S12-wms-combined_245755 | Butyrivibrio phage Idris           | MN882554 | Clustered | VC_876_0  | N6  | 38   | Butyrivibrio     | Group I  | Duplodnaviria | Heunggongvinae | Uroviricota  | Caudoviricetes    | n.a.           | Unclassified | O             | O              |
| S12-wms-combined_250551 | Bacteroides phage p00              | BK010646 | Clustered | VC_677_0  | C1  | 130  | Bacteroides      | Group I  | Duplodnaviria | Heunggongvinae | Uroviricota  | Caudoviricetes    | n.a.           | Unclassified | Unclassified  | Unclassified   |
| S12-wms-combined_256209 | n.a.                               | n.a.     | Clustered | VC_1505_0 | A   | 228  | n.a.             | n.a.     | n.a.          | n.a.           | n.a.         | n.a.              | n.a.           | n.a.         | n.a.          | n.a.           |
| S12-wms-combined_259783 | Roseburia phage Shimadzu           | LR596903 | Clustered | VC_717_0  | C1  | n.a. | Roseburia        | Group I  | Duplodnaviria | Heunggongvinae | Uroviricota  | Caudoviricetes    | n.a.           | Unclassified | Unclassified  | Unclassified   |
| S12-wms-combined_260036 | uncultured phage cri28_1           | MT774392 | Clustered | VC_1439_0 | N7  | 3    | Unspecified      | Group I  | Duplodnaviria | Heunggongvinae | Uroviricota  | Caudoviricetes    | Cxssvirinales  | Steigviridae | O             | O              |
| S12-wms-combined_263377 | Clostridium phage Clo-PEP-1        | KY206887 | Clustered | VC_212_0  | N5  | 17   | Clostridium      | Group I  | Duplodnaviria | Heunggongvinae | Uroviricota  | Caudoviricetes    | n.a.           | Unclassified | O             | O              |
| S12-wms-combined_264425 | n.a.                               | n.a.     | Clustered | VC_1492_0 | A   | n.a. | n.a.             | n.a.     | n.a.          | n.a.           | n.a.         | n.a.              | n.a.           | n.a.         | n.a.          | n.a.           |
| S12-wms-combined_264845 | n.a.                               | n.a.     | Clustered | VC_1507_0 | A   | n.a. | n.a.             | n.a.     | n.a.          | n.a.           | n.a.         | n.a.              | n.a.           | n.a.         | n.a.          | n.a.           |
| S12-wms-combined_282594 | Akkermansia phage DTMo-2021a       | CP084202 | Clustered | VC_736_0  | N3  | 7    | Akkermansia      | Group I  | Duplodnaviria | Heunggongvinae | Uroviricota  | Caudoviricetes    | n.a.           | Unclassified | O             | O              |
| S12-wms-combined_299293 | n.a.                               | n.a.     | Clustered | VC_1492_0 | A   | n.a. | n.a.             | n.a.     | n.a.          | n.a.           | n.a.         | n.a.              | n.a.           | n.a.         | n.a.          | n.a.           |
| S12-wms-combined_299872 | Faecalibacterium phage FP_Mushu    | MG711460 | Clustered | VC_1235_0 | C3  | 71   | Faecalibacterium | Group I  | Duplodnaviria | Heunggongvinae | Uroviricota  | Caudoviricetes    | n.a.           | Unclassified | Unclassified  | Mushuvirus     |
| S12-wms-combined_320727 | Flavobacterium phage FPSV-S27      | MK764448 | Clustered | VC_1397_0 | N4  | 6    | Flavobacterium   | Group I  | Duplodnaviria | Heunggongvinae | Uroviricota  | Caudoviricetes    | n.a.           | Unclassified | O             | O              |
| S12-wms-combined_321174 | Butyrivibrio phage Idris           | MN882554 | Clustered | VC_915_0  | N8  | 6    | Butyrivibrio     | Group I  | Duplodnaviria | Heunggongvinae | Uroviricota  | Caudoviricetes    | n.a.           | Unclassified | O             | O              |
| S12-wms-combined_329242 | n.a.                               | n.a.     | Clustered | VC_1484_0 | A   | n.a. | n.a.             | n.a.     | n.a.          | n.a.           | n.a.         | n.a.              | n.a.           | n.a.         | n.a.          | n.a.           |
| S12-wms-combined_334806 | n.a.                               | n.a.     | Clustered | VC_1239_0 | A   | n.a. | n.a.             | n.a.     | n.a.          | n.a.           | n.a.         | n.a.              | n.a.           | n.a.         | n.a.          | n.a.           |
| S12-wms-combined_345948 | Faecalibacterium phage FP_Lugh     | MG711464 | Clustered | VC_621_0  | C5  | 43   | Faecalibacterium | Group I  | Duplodnaviria | Heunggongvinae | Uroviricota  | Caudoviricetes    | n.a.           | Unclassified | Unclassified  | Lughvirus      |
| S12-wms-combined_351847 | n.a.                               | n.a.     | Clustered | VC_1436_0 | A   | n.a. | n.a.             | n.a.     | n.a.          | n.a.           | n.a.         | n.a.              | n.a.           | n.a.         | n.a.          | n.a.           |
| S12-wms-combined_358010 | Exiguobacterium phage vB_EalM-137  | MH884510 | Clustered | VC_715_0  | N4  | 9    | Exiguobacterium  | Group I  | Duplodnaviria | Heunggongvinae | Uroviricota  | Caudoviricetes    | n.a.           | Unclassified | O             | O              |
| S12-wms-combined_368462 | Streptococcus phage Javan630       | MK448997 | Clustered | VC_626_0  | C7  | 61   | Streptococcus    | Group I  | Duplodnaviria | Heunggongvinae | Uroviricota  | Caudoviricetes    | n.a.           | Unclassified | Unclassified  | Unclassified   |
| S12-wms-combined_375343 | n.a.                               | n.a.     | Clustered | VC_1502_0 | A   | n.a. | n.a.             | n.a.     | n.a.          | n.a.           | n.a.         | n.a.              | n.a.           | n.a.         | n.a.          | n.a.           |
| S12-wms-combined_376326 | n.a.                               | n.a.     | Clustered | VC_1076_0 | A   | n.a. | n.a.             | n.a.     | n.a.          | n.a.           | n.a.         | n.a.              | n.a.           | n.a.         | n.a.          | n.a.           |
| S12-wms-combined_393703 | n.a.                               | n.a.     | Clustered | VC_1481_0 | F   | n.a. | n.a.             | n.a.     | n.a.          | n.a.           | n.a.         | n.a.              | n.a.           | n.a.         | n.a.          | n.a.           |
| S12-wms-combined_401379 | n.a.                               | n.a.     | Clustered | VC_1500_0 | F   | n.a. | n.a.             | n.a.     | n.a.          | n.a.           | n.a.         | n.a.              | n.a.           | n.a.         | n.a.          | n.a.           |
| S12-wms-combined_401383 | n.a.                               | n.a.     | Clustered | VC_1510_0 | F   | n.a. | n.a.             | n.a.     | n.a.          | n.a.           | n.a.         | n.a.              | n.a.           | n.a.         | n.a.          | n.a.           |
| S12-wms-combined_41160  | n.a.                               | n.a.     | Clustered | VC_1238_0 | A   | n.a. | n.a.             | n.a.     | n.a.          | n.a.           | n.a.         | n.a.              | n.a.           | n.a.         | n.a.          | n.a.           |
| S12-wms-combined_51076  | n.a.                               | n.a.     | Clustered | VC_1479_0 | A   | n.a. | n.a.             | n.a.     | n.a.          | n.a.           | n.a.         | n.a.              | n.a.           | n.a.         | n.a.          | n.a.           |
| S12-wms-combined_71235  | Faecalibacterium phage FP_Lugh     | MG711464 | Clustered | VC_621_0  | C4  | 57   | Faecalibacterium | Group I  | Duplodnaviria | Heunggongvinae | Uroviricota  | Caudoviricetes    | n.a.           | Unclassified | Unclassified  | Lughvirus      |
| S12-wms-combined_7174   | Streptococcus phage Javan630       | MK448997 | Clustered | VC_626_0  | C6  | 59   | Streptococcus    | Group I  | Duplodnaviria | Heunggongvinae | Uroviricota  | Caudoviricetes    | n.a.           | Unclassified | Unclassified  | Unclassified   |
| S12-wms-combined_91231  | n.a.                               | n.a.     | Clustered | VC_1439_0 | A   | n.a. | n.a.             | n.a.     | n.a.          | n.a.           | n.a.         | n.a.              | n.a.           | n.a.         | n.a.          | n.a.           |
| S12-wms-combined_99704  | Streptococcus phage Javan105       | MK448667 | Clustered | VC_626_0  | C2  | 81   | Streptococcus    | Group I  | Duplodnaviria | Heunggongvinae | Uroviricota  | Caudoviricetes    | n.a.           | Unclassified | Unclassified  | Unclassified   |
| S12-wms_12658           | Phage vB_RanS_P1N03                | ON245412 | Clustered | VC_918_0  | N8  | 12   | Unspecified      | Group I  | Duplodnaviria | Heunggongvinae | Uroviricota  | Caudoviricetes    | n.a.           | Unclassified | O             | O              |
| S12-wms_15700           | n.a.                               | n.a.     | Clustered | VC_1511_0 | F   | n.a. | n.a.             | n.a.     | n.a.          | n.a.           | n.a.         | n.a.              | n.a.           | n.a.         | n.a.          | n.a.           |
| S12-wms_179388          | n.a.                               | n.a.     | Clustered | VC_1492_0 | A   | n.a. | n.a.             | n.a.     | n.a.          | n.a.           | n.a.         | n.a.              | n.a.           | n.a.         | n.a.          | n.a.           |
| S12-wms_193565          | Faecalibacterium phage FP_Mushu    | MG711460 | Clustered | VC_1235_0 | C1  | 150  | Faecalibacterium | Group I  | Duplodnaviria | Heunggongvinae | Uroviricota  | Caudoviricetes    | n.a.           | Unclassified | Unclassified  | Mushuvirus     |
| S12-wms_373775          | n.a.                               | n.a.     | Clustered | VC_1507_0 | A   | n.a. | n.a.             | n.a.     | n.a.          | n.a.           | n.a.         | n.a.              | n.a.           | n.a.         | n.a.          | n.a.           |
| S12-wms_383851          | n.a.                               | n.a.     | Clustered | VC_1436_0 | A   | n.a. | n.a.             | n.a.     | n.a.          | n.a.           | n.a.         | n.a.              | n.a.           | n.a.         | n.a.          | n.a.           |
| S12-wms_386992          | n.a.                               | n.a.     | Clustered | VC_1456_0 | A   | n.a. | n.a.             | n.a.     | n.a.          | n.a.           | n.a.         | n.a.              | n.a.           | n.a.         | n.a.          | n.a.           |
| S12-wms_401366          | n.a.                               | n.a.     | Clustered | VC_1492_0 | A   | n.a. | n.a.             | n.a.     | n.a.          | n.a.           | n.a.         | n.a.              | n.a.           | n.a.         | n.a.          | n.a.           |
| S12-wms_401372          | Phage DP_SC_6_H4_2017              | MT121964 | Clustered | VC_1420_0 | C2  | 137  | Unspecified      | Group I  | Duplodnaviria | Heunggongvinae | Uroviricota  | Caudoviricetes    | n.a.           | Unclassified | Unclassified  | Unclassified   |
| S12-wms_44817           | n.a.                               | n.a.     | Clustered | VC_1492_0 | A   | n.a. | n.a.             | n.a.     | n.a.          | n.a.           | n.a.         | n.a.              | n.a.           | n.a.         | n.a.          | n.a.           |
| S17-wms-combined_126600 | n.a.                               | n.a.     | Clustered | VC_1481_0 | F   | n.a. | n.a.             | n.a.     | n.a.          | n.a.           | n.a.         | n.a.              | n.a.           | n.a.         | n.a.          | n.a.           |
| S17-wms-combined_126774 | n.a.                               | n.a.     | Clustered | VC_1484_0 | A   | n.a. | n.a.             | n.a.     | n.a.          | n.a.           | n.a.         | n.a.              | n.a.           | n.a.         | n.a.          | n.a.           |
| S17-wms-combined_127688 | Faecalibacterium phage FP_Epona    | MG711462 | Clustered | VC_707_1  | C2  | 106  | Faecalibacterium | Group I  | Duplodnaviria | Heunggongvinae | Uroviricota  | Caudoviricetes    | n.a.           | Unclassified | Unclassified  | Eponavirus     |
| S17-wms-combined_130215 | Streptococcus phage Javan261       | MK448720 | Clustered | VC_338_0  | N9  | 5    | Streptococcus    | Group I  | Duplodnaviria | Heunggongvinae | Uroviricota  | Caudoviricetes    | n.a.           | Unclassified | O             | O              |
| S17-wms-combined_136622 | n.a.                               | n.a.     | Clustered | VC_650_0  | A   | n.a. | n.a.             | n.a.     | n.a.          | n.a.           | n.a.         | n.a.              | n.a.           | n.a.         | n.a.          | n.a.           |
| S17-wms-combined_146850 | n.a.                               | n.a.     | Clustered | VC_1484_0 | A   | n.a. | n.a.             | n.a.     | n.a.          | n.a.           | n.a.         | n.a.              | n.a.           | n.a.         | n.a.          | n.a.           |
| S17-wms-combined_157468 | n.a.                               | n.a.     | Clustered | VC_1484_0 | A   | n.a. | n.a.             | n.a.     | n.a.          | n.a.           | n.a.         | n.a.              | n.a.           | n.a.         | n.a.          | n.a.           |
| S17-wms-combined_158354 | n.a.                               | n.a.     | Clustered | VC_1505_0 | A   | n.a. | n.a.             | n.a.     | n.a.          | n.a.           | n.a.         | n.a.              | n.a.           | n.a.         | n.a.          | n.a.           |
| S17-wms-combined_162786 | n.a.                               | n.a.     | Clustered | VC_1408_0 | A   | n.a. | n.a.             | n.a.     | n.a.          | n.a.           | n.a.         | n.a.              | n.a.           | n.a.         | n.a.          | n.a.           |
| S17-wms-combined_16309  | Bacteroides phage F4               | MT806185 | Clustered | VC_1435_0 | N11 | 8    | Bacteroides      | Group I  | Duplodnaviria | Heunggongvinae | Uroviricota  | Caudoviricetes    | n.a.           | Unclassified | O             | O              |
| S17-wms-combined_175924 | Faecalibacterium phage FP_Mushu    | MG711460 | Clustered | VC_1235_0 | C1  | 96   | Faecalibacterium | Group I  | Duplodnaviria | Heunggongvinae | Uroviricota  | Caudoviricetes    | n.a.           | Unclassified | Unclassified  | Mushuvirus     |
| S17-wms-combined_179771 | n.a.                               | n.a.     | Clustered | VC_1509_0 | A   | n.a. | n.a.             | n.a.     | n.a.          | n.a.           | n.a.         | n.a.              | n.a.           | n.a.         | n.a.          | n.a.           |
| S17-wms-combined_193958 | Faecalibacterium phage FP_Mushu    | MG711460 | Clustered | VC_1235_0 | C3  | 135  | Faecalibacterium | Group I  | Duplodnaviria | Heunggongvinae | Uroviricota  | Caudoviricetes    | n.a.           | Unclassified | Unclassified  | Mushuvirus     |
| S17-wms-combined_199440 | Faecalibacterium phage FP_Epona    | MG711462 | Clustered | VC_707_0  | N10 | 26   | Faecalibacterium | Group I  | Duplodnaviria | Heunggongvinae | Uroviricota  | Caudoviricetes    | n.a.           | Unclassified | O             | O              |
| S17-wms-combined_199746 | Bacteroides phage F4               | MT806185 | Clustered | VC_1014_0 | N10 | 2    | Bacteroides      | Group I  | Duplodnaviria | Heunggongvinae | Uroviricota  | Caudoviricetes    | n.a.           | Unclassified | O             | O              |
| S17-wms-combined_203701 | n.a.                               | n.a.     | Clustered | VC_1508_0 | A   | n.a. | n.a.             | n.a.     | n.a.          | n.a.           | n.a.         | n.a.              | n.a.           | n.a.         | n.a.          | n.a.           |
| S17-wms-combined_223748 | n.a.                               | n.a.     | Clustered | VC_1512_0 | F   | n.a. | n.a.             | n.a.     | n.a.          | n.a.           | n.a.         | n.a.              | n.a.           | n.a.         | n.a.          | n.a.           |
| S17-wms-combined_225356 | n.a.                               | n.a.     | Clustered | VC_1513_0 | A   | n.a. | n.a.             | n.a.     | n.a.          | n.a.           | n.a.         | n.a.              | n.a.           | n.a.         | n.a.          | n.a.           |
| S17-wms-combined_233761 | n.a.                               | n.a.     | Clustered | VC_1495_0 | A   | n.a. | n.a.             | n.a.     | n.a.          | n.a.           | n.a.         | n.a.              | n.a.           | n.a.         | n.a.          | n.a.           |
| S17-wms-combined_247494 | Clostridium phage phiMMP04         | JX145342 | Clustered | VC_650_0  | N15 | 6    | Clostridium      | Group I  | Duplodnaviria | Heunggongvinae | Uroviricota  | Caudoviricetes    | n.a.           | Unclassified | O             | O              |
| S17-wms-combined_259811 | Faecalibacterium phage FP_oengus   | MG711463 | Clustered | VC_804_1  | N8  | 29   | Faecalibacterium | Group I  | Duplodnaviria | Heunggongvinae | Uroviricota  | Caudoviricetes    | n.a.           | Unclassified | O             | O              |
| S17-wms-combined_260343 | Faecalibacterium phage FP_Toutatis | MG711466 | Clustered | VC_710_0  | C5  | 77   | Faecalibacterium | Group I  | Duplodnaviria | Heunggongvinae | Uroviricota  | Caudoviricetes    | n.a.           | Unclassified | Unclassified  | Toutatisvirus  |
| S17-wms-combined_30308  | n.a.                               | n.a.     | Clustered | VC_1482_0 | F   | n.a. | n.a.             | n.a.     | n.a.          | n.a.           | n.a.         | n.a.              | n.a.           | n.a.         | n.a.          | n.a.           |
| S17-wms-combined_47860  | Faecalibacterium phage FP_oengus   | MG711463 | Clustered | VC_804_1  | N7  | 66   | Faecalibacterium | Group I  | Duplodnaviria | Heunggongvinae | Uroviricota  | Caudoviricetes    | n.a.           | Unclassified | O             | O              |
| S17-wms-combined_70983  | n.a.                               | n.a.     | Clustered | VC_1494_0 | F   | n.a. | n.a.             | n.a.     | n.a.          | n.a.           | n.a.         | n.a.              | n.a.           | n.a.         | n.a.          | n.a.           |
| S17-wms-combined_79709  | Clostridium phage phiCT453B        | KM983328 | Clustered | VC_650_0  | N14 | 10   | Clostridium      | Group I  | Duplodnaviria | Heunggongvinae | Uroviricota  | Caudoviricetes    | n.a.           | Unclassified | O             | O              |
| S17-wms-combined_90378  | Faecalibacterium phage FP_Lugh     | MG711464 | Clustered | VC_621_0  | C2  | 65   | Faecalibacterium | Group I  | Duplodnaviria | Heunggongvinae | Uroviricota  | Caudoviricetes    | n.a.           | Unclassified | Unclassified  | Lughvirus      |
| S17-wms-combined_9864   | Streptococcus phage Javan630       | MK448997 | Clustered | VC_626_0  | C7  | 56   | Streptococcus    | Group I  | Duplodnaviria | Heunggongvinae | Uroviricota  | Caudoviricetes    | n.a.           | Unclassified | Unclassified  | Unclassified   |
| S17-wms_124308          | Bacteroides phage F4               | MT806185 | Clustered | VC_1435_0 | N11 | 4    | Bacteroides      | Group I  | Duplodnaviria | Heunggongvinae | Uroviricota  | Caudoviricetes    | n.a.           | Unclassified | O             | O              |
| S17-wms_254872          | Microvirus mar62                   | MZ989898 | Clustered | VC_1276_0 | C1  | 18   | Unspecified      | Group II | Monodnaviria  | Sungvirineae   | Phixviricota | Malgrandviricetes | Petitvirinales | Microviridae | Unclassified  | Microvirus     |
| S17-wms_266511          | Enterobacter phage phiEap-2        | KT287080 | Clustered | VC_540_0  | C1  | 92   | Enterobacter     | Group I  | Duplodnaviria | Heunggongvinae | Uroviricota  | Caudoviricetes    | n.a.           | Unclassified | Quemeyvirinae | Corneliviruses |
| S2-wms-combined_101826  | Paenibacillus phage PGI            | HQ332138 | Clustered | VC_734_0  | C2  | 8    | Paenibacillus    | Group I  | Duplodnaviria | Heunggongvinae | Uroviricota  | Caudoviricetes    | n.a.           | Unclassified | Unclassified  | Unclassified   |
| S2-wms-combined_113619  | Bacteroides phage LoVEphage        | MW660583 | Clustered | VC_832_0  | N12 | 3    | Bacteroides      | Group I  | Duplodnaviria | Heunggongvinae | Uroviricota  | Caudoviricetes    | n.a.           | Unclassified | O             | O              |
| S2-wms-combined_126134  | n.a.                               | n.a.     | Clustered | VC_650_0  | A   | n.a. | n.a.             | n.a.     | n.a.          | n.a.           | n.a.         | n.a.              | n.a.           | n.a.         | n.a.          | n.a.           |
| S2-wms-combined_132966  | Inovirus sp.                       | MT135284 |           |           |     |      |                  |          |               |                |              |                   |                |              |               |                |

|                        |                                    |           |           |           |     |      |                  |              |               |               |             |                |              |              |               |              |
|------------------------|------------------------------------|-----------|-----------|-----------|-----|------|------------------|--------------|---------------|---------------|-------------|----------------|--------------|--------------|---------------|--------------|
| S2-wms-combined_165833 | Faecalibacterium phage FP_Mushu    | MG711460  | Clustered | VC_1235_0 | C3  | 67   | Faecalibacterium | Group I      | Duplodnaviria | Heunggongvine | Uroviricota | Caudoviricetes | n.a.         | Unclassified | Unclassified  | Mushuvirus   |
| S2-wms-combined_166665 | Streptococcus phage SM1            | AY007505  | Clustered | VC_324_0  | N6  | 8    | Streptococcus    | Group I      | Duplodnaviria | Heunggongvine | Uroviricota | Caudoviricetes | n.a.         | Unclassified | O             | O            |
| S2-wms-combined_174241 | Streptococcus phage Javan630       | MK448997  | Clustered | VC_626_0  | C6  | 54   | Streptococcus    | Group I      | Duplodnaviria | Heunggongvine | Uroviricota | Caudoviricetes | n.a.         | Unclassified | Unclassified  | O            |
| S2-wms-combined_176376 | Clostridioides phage phiCD27       | ELI719189 | Clustered | VC_825_0  | N14 | 2    | Clostridioides   | Group I      | Duplodnaviria | Heunggongvine | Uroviricota | Caudoviricetes | n.a.         | Unclassified | O             | O            |
| S2-wms-combined_180640 | Faecalibacterium phage FP_Epona    | MG711462  | Clustered | VC_707_1  | C2  | 54   | Faecalibacterium | Group I      | Duplodnaviria | Heunggongvine | Uroviricota | Caudoviricetes | n.a.         | Unclassified | Unclassified  | Eponavirus   |
| S2-wms-combined_181095 | n.a.                               | n.a.      | Clustered | VC_1481_0 | F   | n.a. | n.a.             | n.a.         | n.a.          | n.a.          | n.a.        | n.a.           | n.a.         | n.a.         | n.a.          | n.a.         |
| S2-wms-combined_196783 | Clostridium phage phiCT19406B      | KM983331  | Clustered | VC_629_0  | N10 | 9    | Clostridium      | Group I      | Duplodnaviria | Heunggongvine | Uroviricota | Caudoviricetes | n.a.         | Unclassified | O             | O            |
| S2-wms-combined_197577 | Phage DP_SC_6_HJ4_2017             | MT121964  | Clustered | VC_1420_0 | C1  | 138  | Unspecified      | Group I      | Duplodnaviria | Heunggongvine | Uroviricota | Caudoviricetes | n.a.         | Unclassified | Unclassified  | Unclassified |
| S2-wms-combined_207832 | Faecalibacterium phage FP_Lagaffe  | MG711461  | Clustered | VC_717_0  | C3  | 94   | Faecalibacterium | Group I      | Duplodnaviria | Heunggongvine | Uroviricota | Caudoviricetes | n.a.         | Unclassified | Unclassified  | Lagaffavirus |
| S2-wms-combined_210822 | n.a.                               | n.a.      | Clustered | VC_1495_0 | A   | n.a. | n.a.             | n.a.         | n.a.          | n.a.          | n.a.        | n.a.           | n.a.         | n.a.         | n.a.          | n.a.         |
| S2-wms-combined_218002 | Clostridioides phage CD1801        | MW512570  | Clustered | VC_148_1  | N13 | 1    | Clostridioides   | Group I      | Duplodnaviria | Heunggongvine | Uroviricota | Caudoviricetes | n.a.         | Unclassified | O             | O            |
| S2-wms-combined_227800 | Bacillus phage vB_BIS_BM1Bp13      | KX190832  | Clustered | VC_420_0  | N7  | 5    | Bacillus         | Group I      | Duplodnaviria | Heunggongvine | Uroviricota | Caudoviricetes | n.a.         | Unclassified | O             | O            |
| S2-wms-combined_229529 | Phage vB_RanS_PJN03                | OC294542  | Clustered | VC_1475_0 | N6  | 2    | Unspecified      | Group I      | Duplodnaviria | Heunggongvine | Uroviricota | Caudoviricetes | n.a.         | Unclassified | O             | O            |
| S2-wms-combined_230929 | Bacillus phage Carmen17            | MG784342  | Clustered | VC_732_0  | N3  | 11   | Bacillus         | Group I      | Duplodnaviria | Heunggongvine | Uroviricota | Caudoviricetes | n.a.         | Unclassified | O             | O            |
| S2-wms-combined_244564 | Streptococcus phage Javan105       | MK448667  | Clustered | VC_626_0  | C2  | 58   | Streptococcus    | Group I      | Duplodnaviria | Heunggongvine | Uroviricota | Caudoviricetes | n.a.         | Unclassified | Unclassified  | Unclassified |
| S2-wms-combined_246480 | Roseburia phage Jekyll             | LR596902  | Clustered | VC_418_0  | C4  | 14   | Roseburia        | Group I      | Duplodnaviria | Heunggongvine | Uroviricota | Caudoviricetes | n.a.         | Unclassified | Unclassified  | Unclassified |
| S2-wms-combined_248318 | n.a.                               | n.a.      | Clustered | VC_1498_0 | F   | n.a. | n.a.             | n.a.         | n.a.          | n.a.          | n.a.        | n.a.           | n.a.         | n.a.         | n.a.          | n.a.         |
| S2-wms-combined_248329 | Butyrivibrio phage Idris           | MN882554  | Clustered | VC_734_0  | N11 | 3    | Butyrivibrio     | Group I      | Duplodnaviria | Heunggongvine | Uroviricota | Caudoviricetes | n.a.         | Unclassified | O             | O            |
| S2-wms-combined_31084  | Clostridium phage Clo-PEP-1        | KY206887  | Clustered | VC_212_1  | N4  | 11   | Clostridium      | Group I      | Duplodnaviria | Heunggongvine | Uroviricota | Caudoviricetes | n.a.         | Unclassified | O             | O            |
| S2-wms-combined_4685   | n.a.                               | n.a.      | Clustered | VC_1484_0 | A   | n.a. | n.a.             | n.a.         | n.a.          | n.a.          | n.a.        | n.a.           | n.a.         | n.a.         | n.a.          | n.a.         |
| S2-wms-combined_55495  | Geobacillus phage GB5V1            | DQ340064  | Clustered | VC_338_0  | N8  | 8    | Geobacillus      | Group I      | Duplodnaviria | Heunggongvine | Uroviricota | Caudoviricetes | n.a.         | Unclassified | O             | O            |
| S2-wms-combined_58121  | n.a.                               | n.a.      | Clustered | VC_1436_0 | A   | n.a. | n.a.             | n.a.         | n.a.          | n.a.          | n.a.        | n.a.           | n.a.         | n.a.         | n.a.          | n.a.         |
| S2-wms-combined_62377  | Bifidobacterium phage BitterVaud1  | MT006236  | Clustered | VC_804_2  | N7  | 33   | Bifidobacterium  | Group I      | Duplodnaviria | Heunggongvine | Uroviricota | Caudoviricetes | n.a.         | Unclassified | O             | O            |
| S2-wms-combined_62519  | Clostridioides phage CD1801        | MW512570  | Clustered | VC_148_0  | N11 | 3    | Clostridioides   | Group I      | Duplodnaviria | Heunggongvine | Uroviricota | Caudoviricetes | n.a.         | Unclassified | O             | O            |
| S2-wms-combined_6605   | n.a.                               | n.a.      | Clustered | VC_1484_0 | A   | n.a. | n.a.             | n.a.         | n.a.          | n.a.          | n.a.        | n.a.           | n.a.         | n.a.         | n.a.          | n.a.         |
| S2-wms-combined_85381  | Faecalibacterium phage FP_Epona    | MG711462  | Clustered | VC_707_1  | C6  | 34   | Faecalibacterium | Group I      | Duplodnaviria | Heunggongvine | Uroviricota | Caudoviricetes | n.a.         | Unclassified | Unclassified  | Eponavirus   |
| S2-wms-combined_89742  | Burkholderia phage BcepMu          | AY539836  | Clustered | VC_610_0  | N4  | 4    | Burkholderia     | Group I      | Duplodnaviria | Heunggongvine | Uroviricota | Caudoviricetes | n.a.         | Unclassified | Unclassified  | O            |
| S2-wms-combined_93845  | Faecalibacterium phage FP_Mushu    | MG711460  | Clustered | VC_1235_0 | N8  | 8    | Faecalibacterium | Group I      | Duplodnaviria | Heunggongvine | Uroviricota | Caudoviricetes | n.a.         | Unclassified | O             | O            |
| S2-wms_107329          | Faecalibacterium phage FP_Brigit   | MG711465  | Clustered | VC_606_0  | C3  | 131  | Faecalibacterium | Group I      | Duplodnaviria | Heunggongvine | Uroviricota | Caudoviricetes | n.a.         | Unclassified | Unclassified  | Brigitvirus  |
| S2-wms_110761          | n.a.                               | n.a.      | Clustered | VC_1496_0 | F   | n.a. | n.a.             | n.a.         | n.a.          | n.a.          | n.a.        | n.a.           | n.a.         | n.a.         | n.a.          | n.a.         |
| S2-wms_128831          | Phage DP_SC_6_HJ4_2017             | MT121964  | Clustered | VC_1420_0 | C2  | 137  | Unspecified      | Group I      | Duplodnaviria | Heunggongvine | Uroviricota | Caudoviricetes | n.a.         | Unclassified | Unclassified  | Unclassified |
| S2-wms_128962          | uncultured phage cr53_1            | MT774396  | Clustered | VC_502_0  | N2  | 228  | Unspecified      | Group I      | Duplodnaviria | Heunggongvine | Uroviricota | Caudoviricetes | Crassvirales | Suoliviridae | O             | O            |
| S2-wms_130687          | Solobacterium phage SMO_IP         | MZ503613  | Clustered | VC_417_0  | C2  | 23   | Solobacterium    | Group I      | Duplodnaviria | Heunggongvine | Uroviricota | Caudoviricetes | n.a.         | Unclassified | Unclassified  | Unclassified |
| S2-wms_140933          | Roseburia phage Jekyll             | LR596902  | Clustered | VC_418_0  | C4  | 20   | Roseburia        | Group I      | Duplodnaviria | Heunggongvine | Uroviricota | Caudoviricetes | n.a.         | Unclassified | Unclassified  | Unclassified |
| S2-wms_156439          | Bacteroides phage F4               | MT806185  | Clustered | VC_1435_0 | N11 | 4    | Bacteroides      | Group I      | Duplodnaviria | Heunggongvine | Uroviricota | Caudoviricetes | n.a.         | Unclassified | O             | O            |
| S2-wms_23562           | n.a.                               | n.a.      | Clustered | VC_1496_0 | F   | n.a. | n.a.             | n.a.         | n.a.          | n.a.          | n.a.        | n.a.           | n.a.         | n.a.         | n.a.          | n.a.         |
| S2-wms_248315          | Faecalibacterium phage FP_oengus   | MG711463  | Clustered | VC_804_2  | N7  | 45   | Faecalibacterium | Group I      | Duplodnaviria | Heunggongvine | Uroviricota | Caudoviricetes | n.a.         | Unclassified | O             | O            |
| S2-wms_53881           | Bacillus phage Chedec 11           | ON042750  | Clustered | VC_120_1  | N2  | 7    | Bacillus         | Group I      | Duplodnaviria | Heunggongvine | Uroviricota | Caudoviricetes | n.a.         | Unclassified | Salamaviridae | O            |
| S2-wms_79304           | Actinomyces phage Av-1             | DQ123818  | Clustered | VC_744_0  | C1  | 19   | Actinomyces      | Group I      | Duplodnaviria | Heunggongvine | Uroviricota | Caudoviricetes | n.a.         | Unclassified | Unclassified  | Dybvigvirus  |
| S2-wms_79944           | Faecalibacterium phage FP_Brigit   | MG711465  | Clustered | VC_626_0  | N8  | 16   | Faecalibacterium | Group I      | Duplodnaviria | Heunggongvine | Uroviricota | Caudoviricetes | n.a.         | Unclassified | O             | O            |
| S2-wms_140933          | Bacteroides phage p00              | BQ100646  | Clustered | VC_677_0  | C1  | 108  | Bacteroides      | Group I      | Duplodnaviria | Heunggongvine | Uroviricota | Caudoviricetes | n.a.         | Unclassified | Unclassified  | Unclassified |
| S3-wms_22744           | Faecalibacterium phage FP_Lagaffe  | MG711461  | Clustered | VC_717_0  | C3  | 102  | Faecalibacterium | Group I      | Duplodnaviria | Heunggongvine | Uroviricota | Caudoviricetes | n.a.         | Unclassified | Unclassified  | Lagaffavirus |
| S3-wms_23958           | Caldibacillus phage CBP1           | MF595878  | Clustered | VC_915_0  | N18 | 5    | Caldibacillus    | Group I      | Duplodnaviria | Heunggongvine | Uroviricota | Caudoviricetes | n.a.         | Unclassified | O             | O            |
| S4-wms-combined_113721 | n.a.                               | n.a.      | Clustered | VC_893_0  | A   | n.a. | n.a.             | n.a.         | n.a.          | n.a.          | n.a.        | n.a.           | n.a.         | n.a.         | n.a.          | n.a.         |
| S4-wms-combined_143879 | n.a.                               | n.a.      | Clustered | VC_1482_0 | F   | n.a. | n.a.             | n.a.         | n.a.          | n.a.          | n.a.        | n.a.           | n.a.         | n.a.         | n.a.          | n.a.         |
| S4-wms-combined_14411  | Parabacteroides phage PDS1         | MN929097  | Clustered | VC_831_0  | C2  | 150  | Parabacteroides  | Group I      | Duplodnaviria | Heunggongvine | Uroviricota | Caudoviricetes | n.a.         | Unclassified | Unclassified  | Unclassified |
| S4-wms-combined_17284  | Bifidobacterium phage Bif1-I       | GQ141189  | Clustered | VC_852_0  | C1  | 135  | Bifidobacterium  | Group I      | Duplodnaviria | Heunggongvine | Uroviricota | Caudoviricetes | n.a.         | Unclassified | Unclassified  | Unclassified |
| S4-wms-combined_41490  | Burkholderia phage BcepMu          | AY539836  | Clustered | VC_610_0  | N5  | 2    | Burkholderia     | Group I      | Duplodnaviria | Heunggongvine | Uroviricota | Caudoviricetes | n.a.         | Unclassified | O             | O            |
| S4-wms-combined_42647  | Faecalibacterium phage FP_Lugh     | MG711464  | Clustered | VC_621_0  | C5  | 60   | Faecalibacterium | Group I      | Duplodnaviria | Heunggongvine | Uroviricota | Caudoviricetes | n.a.         | Unclassified | Unclassified  | Lughvirus    |
| S4-wms-combined_47565  | n.a.                               | n.a.      | Clustered | VC_1495_0 | A   | n.a. | n.a.             | n.a.         | n.a.          | n.a.          | n.a.        | n.a.           | n.a.         | n.a.         | n.a.          | n.a.         |
| S4-wms-combined_51079  | n.a.                               | n.a.      | Clustered | VC_1497_0 | F   | n.a. | n.a.             | n.a.         | n.a.          | n.a.          | n.a.        | n.a.           | n.a.         | n.a.         | n.a.          | n.a.         |
| S4-wms-combined_57123  | n.a.                               | n.a.      | Clustered | VC_1508_0 | A   | n.a. | n.a.             | n.a.         | n.a.          | n.a.          | n.a.        | n.a.           | n.a.         | n.a.         | n.a.          | n.a.         |
| S4-wms-combined_64632  | Roseburia phage Jekyll             | LR596902  | Clustered | VC_418_0  | C5  | 4    | Roseburia        | Group I      | Duplodnaviria | Heunggongvine | Uroviricota | Caudoviricetes | n.a.         | Unclassified | Unclassified  | Unclassified |
| S4-wms_107182          | n.a.                               | n.a.      | Clustered | VC_1513_0 | A   | n.a. | n.a.             | n.a.         | n.a.          | n.a.          | n.a.        | n.a.           | n.a.         | n.a.         | n.a.          | n.a.         |
| S4-wms_118690          | Lactococcus phage phiQ1            | AP101927  | Clustered | VC_535_0  | N2  | 7    | Lactococcus      | Group I      | Duplodnaviria | Heunggongvine | Uroviricota | Caudoviricetes | n.a.         | Unclassified | O             | O            |
| S4-wms_141607          | Bacteroides phage F4               | MT806185  | Clustered | VC_1008_0 | C1  | 77   | Bacteroides      | Group I      | Duplodnaviria | Heunggongvine | Uroviricota | Caudoviricetes | n.a.         | Unclassified | Unclassified  | Unclassified |
| S4-wms_161443          | Bacteriophage sp.                  | OP549880  | Clustered | VC_1477_0 | C2  | 25   | Unspecified      | Unclassified | Unclassified  | n.a.          | n.a.        | n.a.           | n.a.         | n.a.         | n.a.          | n.a.         |
| S4-wms_45128           | n.a.                               | n.a.      | Clustered | VC_1439_0 | A   | n.a. | n.a.             | n.a.         | n.a.          | n.a.          | n.a.        | n.a.           | n.a.         | n.a.         | n.a.          | n.a.         |
| S4-wms_62635           | Roseburia phage Jekyll             | LR596902  | Clustered | VC_418_0  | C4  | 29   | Roseburia        | Group I      | Duplodnaviria | Heunggongvine | Uroviricota | Caudoviricetes | n.a.         | Unclassified | Unclassified  | Unclassified |
| S4-wms_73990           | uncultured phage cr50_1            | MT774375  | Clustered | VC_502_1  | C1  | 130  | Unspecified      | Group I      | Duplodnaviria | Heunggongvine | Uroviricota | Caudoviricetes | Crassvirales | Suoliviridae | Boovirinae    | Cohovirus    |
| S5-wms-combined_117213 | Bifidobacterium phage Bif1-I       | GQ141189  | Clustered | VC_854_0  | N3  | 19   | Bifidobacterium  | Group I      | Duplodnaviria | Heunggongvine | Uroviricota | Caudoviricetes | n.a.         | Unclassified | O             | O            |
| S5-wms-combined_134381 | Faecalibacterium phage FP_Lagaffe  | MG711461  | Clustered | VC_717_0  | C3  | 84   | Faecalibacterium | Group I      | Duplodnaviria | Heunggongvine | Uroviricota | Caudoviricetes | n.a.         | Unclassified | Unclassified  | Lagaffavirus |
| S5-wms-combined_145067 | Clostridium phage phiCT453B        | KM983328  | Clustered | VC_650_0  | N11 | 8    | Clostridium      | Group I      | Duplodnaviria | Heunggongvine | Uroviricota | Caudoviricetes | n.a.         | Unclassified | O             | O            |
| S5-wms-combined_178432 | n.a.                               | n.a.      | Clustered | VC_1506_0 | A   | n.a. | n.a.             | n.a.         | n.a.          | n.a.          | n.a.        | n.a.           | n.a.         | n.a.         | n.a.          | n.a.         |
| S5-wms-combined_18356  | Escherichia phage ESS12_cv239      | LR597637  | Clustered | VC_5_0    | C1  | 58   | Escherichia      | Group I      | Duplodnaviria | Heunggongvine | Uroviricota | Caudoviricetes | n.a.         | Unclassified | Peduviridae   | Evevirus     |
| S5-wms-combined_200605 | Streptococcus phage Javan105       | MK448667  | Clustered | VC_626_0  | C2  | 92   | Streptococcus    | Group I      | Duplodnaviria | Heunggongvine | Uroviricota | Caudoviricetes | n.a.         | Unclassified | Unclassified  | Unclassified |
| S5-wms-combined_207921 | n.a.                               | n.a.      | Clustered | VC_1437_0 | A   | n.a. | n.a.             | n.a.         | n.a.          | n.a.          | n.a.        | n.a.           | n.a.         | n.a.         | n.a.          | n.a.         |
| S5-wms-combined_26971  | Butyrivibrio phage Idris           | MN882554  | Clustered | VC_736_0  | N8  | 29   | Butyrivibrio     | Group I      | Duplodnaviria | Heunggongvine | Uroviricota | Caudoviricetes | n.a.         | Unclassified | O             | O            |
| S5-wms-combined_29272  | Streptococcus phage Javan630       | MK448997  | Clustered | VC_626_0  | C7  | 55   | Streptococcus    | Group I      | Duplodnaviria | Heunggongvine | Uroviricota | Caudoviricetes | n.a.         | Unclassified | Unclassified  | Unclassified |
| S5-wms-combined_29447  | Winogradskyella phage Peternella_1 | MT732475  | Clustered | VC_676_0  | N8  | 17   | Winogradskyella  | Group I      | Duplodnaviria | Heunggongvine | Uroviricota | Caudoviricetes | n.a.         | Unclassified | O             | O            |
| S5-wms-combined_39793  | n.a.                               | n.a.      | Clustered | VC_1514_0 | F   | n.a. | n.a.             | n.a.         | n.a.          | n.a.          | n.a.        | n.a.           | n.a.         | n.a.         | n.a.          | n.a.         |
| S5-wms-combined_52741  | Akkermansia phage DTMo-2021a       | CP084020  | Clustered | VC_736_0  | N2  | 17   | Akkermansia      | Group I      | Duplodnaviria | Heunggongvine | Uroviricota | Caudoviricetes | n.a.         | Unclassified | O             | O            |
| S5-wms-combined_59064  | Bacteroides phage p00              | BK010646  | Clustered | VC_677_0  | C1  | 75   | Bacteroides      | Group I      | Duplodnaviria | Heunggongvine | Uroviricota | Caudoviricetes | n.a.         | Unclassified | Unclassified  | Unclassified |
| S5-wms-combined_66017  | n.a.                               | n.a.      | Clustered | VC_1499_0 | F   | n.a. | n.a.             | n.a.         | n.a.          | n.a.          | n.a.        | n.a.           | n.a.         | n.a.         | n.a.          | n.a.         |
| S5-wms-combined_7292   | Caldibacillus phage CBP1           | MF595878  | Clustered | VC_734_0  | C2  | 8    | Caldibacillus    | Group I      | Duplodnaviria | Heunggongvine | Uroviricota | Caudoviricetes | n.a.         | Unclassified | Unclassified  | Unclassified |
| S5-wms-combined_73301  | Clostridium phage phiCD38-2        | HM568888  | Clustered | VC_627_0  | N4  | 8    | Clostridium      | Group I      | Duplodnaviria | Heunggongvine | Uroviricota | Caudoviricetes | n.a.         | Unclassified | O             | O            |
| S5-wms-combined_78434  | n.a.                               | n.a.      | Clustered | VC_1479_0 | A   | n.a. | n.a.             | n.a.         | n.a.          | n.a.          | n.a.        | n.a.           | n.a.         | n.a.         | n.a.          | n.a.         |
| S5-wms-combined_83370  | Bacteroides phage p00              | BK010646  | Clustered | VC_680_0  | N2  | 29   | Bacteroides      | Group I      | Duplodnaviria | Heunggongvine | Uroviricota | Caudoviricetes | n.a.         | Unclassified | O             | O            |
| S5-wms-combined_83412  | Clostridium phage phiSM101         | CP000315  | Clustered | VC_19_0   | C1  | 15   | Clostridium      | Group I      | Duplodnaviria | Heunggongvine | Uroviricota | Caudoviricetes | n.a.         | Unclassified | Unclassified  | Unclassified |
| S5-wms-combined_98202  | n.a.                               | n.a.      | Clustered | VC_1503_0 | A   | n.a. | n.a.             | n.a.         | n.a.          | n.a.          | n.a.        | n.a.           | n.a.         | n.a.         | n.a.          | n.a.         |
| S5-wms_210460          | n.a.                               | n.a.      | Clustered | VC_1499_0 | F   | n.a. | n.a.             | n.a.         | n.a.          | n.a.          | n.a.        | n.a.           | n.a.         | n.a.         | n.a.          | n.a.         |
| S5-wms_49310           | Solobacterium phage SMO_IP         | MZ503613  | Clustered | VC_417_0  | C2  | 28   | Solobacterium    | Group I      | Duplodnaviria | Heunggongvine | Uroviricota | Caudoviricetes | n.a.         | Unclassified | Unclassified  | Unclassified |
| S5-wms_52566           | n.a.                               | n.a.      |           |           |     |      |                  |              |               |               |             |                |              |              |               |              |

|                          |                                    |           |           |           |     |      |                  |              |               |                |             |                |              |              |              |               |
|--------------------------|------------------------------------|-----------|-----------|-----------|-----|------|------------------|--------------|---------------|----------------|-------------|----------------|--------------|--------------|--------------|---------------|
| S6-wms-combined_117756   | Faecalibacterium phage FP_Epona    | MG711462  | Clustered | VC_707_1  | C3  | 96   | Faecalibacterium | Group 1      | Duplodnaviria | Heunggongvinae | Uroviricota | Caudoviricetes | n.a.         | Unclassified | Unclassified | Eponavirus    |
| S6-wms-combined_118484   | Bacteriophage sp.                  | LT985574  | Clustered | VC_338_0  | N10 | 5    | Unspecified      | Unclassified | Unclassified  | n.a.           | n.a.        | n.a.           | n.a.         | Unclassified | O            | O             |
| S6-wms-combined_119017   | Pseudomonas phage phi3             | KT887559  | Clustered | VC_5_0    | C2  | 39   | Pseudomonas      | Group 1      | Duplodnaviria | Heunggongvinae | Uroviricota | Caudoviricetes | n.a.         | Unclassified | Unclassified | Phitrevirus   |
| S6-wms-combined_119138   | Clostridioides phage CD2301        | MW5112671 | Clustered | VC_148_1  | N11 | 2    | Clostridioides   | Group 1      | Duplodnaviria | Heunggongvinae | Uroviricota | Caudoviricetes | n.a.         | Unclassified | O            | O             |
| S6-wms-combined_126236   | Faecalibacterium phage FP_Toutatis | MG711466  | Clustered | VC_710_0  | C2  | 64   | Faecalibacterium | Group 1      | Duplodnaviria | Heunggongvinae | Uroviricota | Caudoviricetes | n.a.         | Unclassified | Unclassified | Toutatisvirus |
| S6-wms-combined_135223   | n.a.                               | n.a.      | Clustered | VC_1508_0 | A   | n.a. | n.a.             | n.a.         | n.a.          | n.a.           | n.a.        | n.a.           | n.a.         | n.a.         | n.a.         | n.a.          |
| S6-wms-combined_140731   | n.a.                               | n.a.      | Clustered | VC_825_0  | A   | n.a. | n.a.             | n.a.         | n.a.          | n.a.           | n.a.        | n.a.           | n.a.         | n.a.         | n.a.         | n.a.          |
| S6-wms-combined_32530    | Clostridioides phage CD1801        | MW512570  | Clustered | VC_148_1  | N10 | 2    | Clostridioides   | Group 1      | Duplodnaviria | Heunggongvinae | Uroviricota | Caudoviricetes | n.a.         | Unclassified | O            | O             |
| S6-wms-combined_41246    | n.a.                               | n.a.      | Clustered | VC_1484_0 | A   | n.a. | n.a.             | n.a.         | n.a.          | n.a.           | n.a.        | n.a.           | n.a.         | n.a.         | n.a.         | n.a.          |
| S6-wms-combined_49909    | Streptococcus phage Javan35        | MK448736  | Clustered | VC_324_0  | N6  | 8    | Streptococcus    | Group 1      | Duplodnaviria | Heunggongvinae | Uroviricota | Caudoviricetes | n.a.         | Unclassified | O            | O             |
| S6-wms-combined_50721    | Winogradskyella phage Petemella_1  | MT732475  | Clustered | VC_676_1  | N11 | 16   | Winogradskyella  | Group 1      | Duplodnaviria | Heunggongvinae | Uroviricota | Caudoviricetes | n.a.         | Unclassified | O            | O             |
| S6-wms-combined_72228    | n.a.                               | n.a.      | Clustered | VC_1506_0 | A   | n.a. | n.a.             | n.a.         | n.a.          | n.a.           | n.a.        | n.a.           | n.a.         | n.a.         | n.a.         | n.a.          |
| S6-wms-combined_8508     | Faecalibacterium phage FP_Epona    | MG711462  | Clustered | VC_707_0  | N11 | 42   | Faecalibacterium | Group 1      | Duplodnaviria | Heunggongvinae | Uroviricota | Caudoviricetes | n.a.         | Unclassified | O            | O             |
| S6-wms-combined_91039    | n.a.                               | n.a.      | Clustered | VC_1456_0 | A   | n.a. | n.a.             | n.a.         | n.a.          | n.a.           | n.a.        | n.a.           | n.a.         | n.a.         | n.a.         | n.a.          |
| S6-wms_132588            | Clostridium phage Clo-PEP-1        | KY206887  | Clustered | VC_212_0  | N4  | 18   | Clostridium      | Group 1      | Duplodnaviria | Heunggongvinae | Uroviricota | Caudoviricetes | n.a.         | Unclassified | O            | O             |
| S6-wms_137591            | n.a.                               | n.a.      | Clustered | VC_1496_0 | F   | n.a. | n.a.             | n.a.         | n.a.          | n.a.           | n.a.        | n.a.           | n.a.         | n.a.         | n.a.         | n.a.          |
| S6-wms_138342            | uncultured phage cr53_1            | MT774396  | Clustered | VC_502_0  | N2  | 233  | Unspecified      | Group 1      | Duplodnaviria | Heunggongvinae | Uroviricota | Caudoviricetes | Crassvirales | Suoliviridae | O            | O             |
| S6-wms_54578             | Parabacteroides phage PDS1         | MN929097  | Clustered | VC_831_0  | C3  | 113  | Parabacteroides  | Group 1      | Duplodnaviria | Heunggongvinae | Uroviricota | Caudoviricetes | n.a.         | Unclassified | Unclassified | Unclassified  |
| S7-wms-combined_104872   | n.a.                               | n.a.      | Clustered | VC_1437_0 | A   | n.a. | n.a.             | n.a.         | n.a.          | n.a.           | n.a.        | n.a.           | n.a.         | n.a.         | n.a.         | n.a.          |
| S7-wms-combined_107679_0 | Winogradskyella phage Petemella_1  | MT732475  | Clustered | VC_676_1  | N11 | 17   | Winogradskyella  | Group 1      | Duplodnaviria | Heunggongvinae | Uroviricota | Caudoviricetes | n.a.         | Unclassified | O            | O             |
| S7-wms-combined_111004   | Faecalibacterium phage FP_Taranis  | MG711467  | Clustered | VC_711_0  | C1  | 200  | Faecalibacterium | Group 1      | Duplodnaviria | Heunggongvinae | Uroviricota | Caudoviricetes | n.a.         | Unclassified | Unclassified | Taranisvirus  |
| S7-wms-combined_134458   | Faecalibacterium phage FP_Toutatis | MG711466  | Clustered | VC_710_0  | C4  | 73   | Faecalibacterium | Group 1      | Duplodnaviria | Heunggongvinae | Uroviricota | Caudoviricetes | n.a.         | Unclassified | Unclassified | Toutatisvirus |
| S7-wms-combined_136642   | n.a.                               | n.a.      | Clustered | VC_1497_0 | F   | n.a. | n.a.             | n.a.         | n.a.          | n.a.           | n.a.        | n.a.           | n.a.         | n.a.         | n.a.         | n.a.          |
| S7-wms-combined_139683   | Butyrivibrio phage Idris           | MN882554  | Clustered | VC_876_0  | N6  | 34   | Butyrivibrio     | Group 1      | Duplodnaviria | Heunggongvinae | Uroviricota | Caudoviricetes | n.a.         | Unclassified | O            | O             |
| S7-wms-combined_14267    | n.a.                               | n.a.      | Clustered | VC_1456_0 | A   | n.a. | n.a.             | n.a.         | n.a.          | n.a.           | n.a.        | n.a.           | n.a.         | n.a.         | n.a.         | n.a.          |
| S7-wms-combined_143218   | n.a.                               | n.a.      | Clustered | VC_1514_0 | F   | n.a. | n.a.             | n.a.         | n.a.          | n.a.           | n.a.        | n.a.           | n.a.         | n.a.         | n.a.         | n.a.          |
| S7-wms-combined_147158   | Microbacterium phage Mini1         | EF579802  | Clustered | VC_798_0  | N6  | 14   | Microbacterium   | Group 1      | Duplodnaviria | Heunggongvinae | Uroviricota | Caudoviricetes | n.a.         | Unclassified | O            | O             |
| S7-wms-combined_163980   | n.a.                               | n.a.      | Clustered | VC_1014_0 | A   | n.a. | n.a.             | n.a.         | n.a.          | n.a.           | n.a.        | n.a.           | n.a.         | n.a.         | n.a.         | n.a.          |
| S7-wms-combined_185016   | Bacteroides phage F4               | MT806185  | Clustered | VC_1435_0 | N11 | 3    | Bacteroides      | Group 1      | Duplodnaviria | Heunggongvinae | Uroviricota | Caudoviricetes | n.a.         | Unclassified | O            | O             |
| S7-wms-combined_189250   | Bifidobacterium phage BigBem1      | MT006237  | Clustered | VC_1198_0 | C2  | 5    | Bifidobacterium  | Group 1      | Duplodnaviria | Heunggongvinae | Uroviricota | Caudoviricetes | n.a.         | Unclassified | Unclassified | Unclassified  |
| S7-wms-combined_225260   | Clostridium phage HM2              | LT600745  | Clustered | VC_822_0  | C1  | 4    | Clostridium      | Group 1      | Duplodnaviria | Heunggongvinae | Uroviricota | Caudoviricetes | n.a.         | Unclassified | Unclassified | Unclassified  |
| S7-wms-combined_235165   | Erysipelothrix phage SE-1          | KR816341  | Clustered | VC_1109_0 | C1  | 12   | Erysipelothrix   | Group 1      | Duplodnaviria | Heunggongvinae | Uroviricota | Caudoviricetes | n.a.         | Unclassified | Unclassified | Unclassified  |
| S7-wms-combined_239784   | n.a.                               | n.a.      | Clustered | VC_1436_0 | A   | n.a. | n.a.             | n.a.         | n.a.          | n.a.           | n.a.        | n.a.           | n.a.         | n.a.         | n.a.         | n.a.          |
| S7-wms-combined_28138    | Listeria phage LP-Q30-2            | JX120799  | Clustered | VC_420_0  | N8  | 6    | Listeria         | Group 1      | Duplodnaviria | Heunggongvinae | Uroviricota | Caudoviricetes | n.a.         | Unclassified | O            | O             |
| S7-wms-combined_31068    | n.a.                               | n.a.      | Clustered | VC_650_0  | A   | n.a. | n.a.             | n.a.         | n.a.          | n.a.           | n.a.        | n.a.           | n.a.         | n.a.         | n.a.         | n.a.          |
| S7-wms-combined_40779    | n.a.                               | n.a.      | Clustered | VC_1239_0 | A   | n.a. | n.a.             | n.a.         | n.a.          | n.a.           | n.a.        | n.a.           | n.a.         | n.a.         | n.a.         | n.a.          |
| S7-wms-combined_43950    | Bacteroides phage p00              | BK010646  | Clustered | VC_677_0  | C1  | 129  | Bacteroides      | Group 1      | Duplodnaviria | Heunggongvinae | Uroviricota | Caudoviricetes | n.a.         | Unclassified | Unclassified | Unclassified  |
| S7-wms-combined_5625     | Bacteroides phage p00              | BK010646  | Clustered | VC_677_0  | C4  | 35   | Bacteroides      | Group 1      | Duplodnaviria | Heunggongvinae | Uroviricota | Caudoviricetes | n.a.         | Unclassified | Unclassified | Unclassified  |
| S7-wms-combined_7205     | Clostridium phage Clo-PEP-1        | KY206887  | Clustered | VC_212_1  | N5  | 16   | Clostridium      | Group 1      | Duplodnaviria | Heunggongvinae | Uroviricota | Caudoviricetes | n.a.         | Unclassified | O            | O             |
| S7-wms-combined_72070    | n.a.                               | n.a.      | Clustered | VC_1509_0 | A   | n.a. | n.a.             | n.a.         | n.a.          | n.a.           | n.a.        | n.a.           | n.a.         | n.a.         | n.a.         | n.a.          |
| S7-wms-combined_84688    | n.a.                               | n.a.      | Clustered | VC_1484_0 | A   | n.a. | n.a.             | n.a.         | n.a.          | n.a.           | n.a.        | n.a.           | n.a.         | n.a.         | n.a.         | n.a.          |
| S7-wms-combined_90393    | Bacteroides phage F4               | MT806185  | Clustered | VC_1435_0 | N10 | 8    | Bacteroides      | Group 1      | Duplodnaviria | Heunggongvinae | Uroviricota | Caudoviricetes | n.a.         | Unclassified | O            | O             |
| S7-wms-combined_90728    | Bacteroides phage F4               | MT806185  | Clustered | VC_1435_0 | N6  | 11   | Bacteroides      | Group 1      | Duplodnaviria | Heunggongvinae | Uroviricota | Caudoviricetes | n.a.         | Unclassified | O            | O             |
| S7-wms_113137            | Faecalibacterium phage FP_Mushu    | MG711460  | Clustered | VC_1235_0 | C1  | 170  | Faecalibacterium | Group 1      | Duplodnaviria | Heunggongvinae | Uroviricota | Caudoviricetes | n.a.         | Unclassified | Unclassified | Mushuvirus    |
| S7-wms_118607            | Faecalibacterium phage FP_Lagaffe  | MG711461  | Clustered | VC_717_0  | C1  | 230  | Faecalibacterium | Group 1      | Duplodnaviria | Heunggongvinae | Uroviricota | Caudoviricetes | n.a.         | Unclassified | Unclassified | Lagaffevirus  |
| S7-wms_123957            | n.a.                               | n.a.      | Clustered | VC_1435_0 | A   | n.a. | n.a.             | n.a.         | n.a.          | n.a.           | n.a.        | n.a.           | n.a.         | n.a.         | n.a.         | n.a.          |
| S7-wms_127801            | Clostridium phage phiCD6356        | GU949551  | Clustered | VC_420_0  | N4  | 6    | Clostridium      | Group 1      | Duplodnaviria | Heunggongvinae | Uroviricota | Caudoviricetes | n.a.         | Unclassified | O            | O             |
| S7-wms_157264            | Bacteriophage sp.                  | OP549880  | Clustered | VC_1477_0 | C2  | 24   | Unspecified      | Unclassified | Unclassified  | n.a.           | n.a.        | n.a.           | n.a.         | Unclassified | Unclassified | Unclassified  |
| S7-wms_159432            | Faecalibacterium phage FP_Epona    | MG711462  | Clustered | VC_707_1  | C4  | 67   | Faecalibacterium | Group 1      | Duplodnaviria | Heunggongvinae | Uroviricota | Caudoviricetes | n.a.         | Unclassified | Unclassified | Eponavirus    |
| S7-wms_200936            | Faecalibacterium phage FP_Mushu    | MG711460  | Clustered | VC_1235_0 | C2  | 142  | Faecalibacterium | Group 1      | Duplodnaviria | Heunggongvinae | Uroviricota | Caudoviricetes | n.a.         | Unclassified | Unclassified | Mushuvirus    |
| S7-wms_239833            | Bacillus phage vB_BsuP-Goe1        | KU831549  | Clustered | VC_821_0  | N1  | 10   | Bacillus         | Group 1      | Duplodnaviria | Heunggongvinae | Uroviricota | Caudoviricetes | n.a.         | Unclassified | O            | O             |
| S7-wms_244225            | uncultured phage cr127_1           | MT774393  | Clustered | VC_675_0  | C1  | 70   | Unspecified      | Group 1      | Duplodnaviria | Heunggongvinae | Uroviricota | Caudoviricetes | Crassvirales | Deltavirinae | Kahucivirus  | Unclassified  |
| S7-wms_244866            | Bacteroides phage EMB2             | ON721385  | Clustered | VC_1009_0 | C1  | 149  | Bacteroides      | Group 1      | Duplodnaviria | Heunggongvinae | Uroviricota | Caudoviricetes | n.a.         | Unclassified | Unclassified | Unclassified  |
| S7-wms_53338             | Enterococcus phage Athos           | LR900834  | Clustered | VC_821_0  | N1  | 9    | Enterococcus     | Group 1      | Duplodnaviria | Heunggongvinae | Uroviricota | Caudoviricetes | n.a.         | Unclassified | O            | O             |
| S7-wms_80255             | Streptococcus phage Javan249       | MK448716  | Clustered | VC_629_0  | N2  | 10   | Streptococcus    | Group 1      | Duplodnaviria | Heunggongvinae | Uroviricota | Caudoviricetes | n.a.         | Unclassified | O            | O             |
| S8-wms-combined_108917   | Streptococcus phage Javan630       | MK448997  | Clustered | VC_626_0  | C7  | 54   | Streptococcus    | Group 1      | Duplodnaviria | Heunggongvinae | Uroviricota | Caudoviricetes | n.a.         | Unclassified | Unclassified | Unclassified  |
| S8-wms-combined_134098   | n.a.                               | n.a.      | Clustered | VC_1239_0 | A   | n.a. | n.a.             | n.a.         | n.a.          | n.a.           | n.a.        | n.a.           | n.a.         | n.a.         | n.a.         | n.a.          |
| S8-wms-combined_134284   | n.a.                               | n.a.      | Clustered | VC_1236_0 | A   | n.a. | n.a.             | n.a.         | n.a.          | n.a.           | n.a.        | n.a.           | n.a.         | n.a.         | n.a.         | n.a.          |
| S8-wms-combined_140059   | n.a.                               | n.a.      | Clustered | VC_420_0  | A   | n.a. | n.a.             | n.a.         | n.a.          | n.a.           | n.a.        | n.a.           | n.a.         | n.a.         | n.a.         | n.a.          |
| S8-wms-combined_146562   | Faecalibacterium phage FP_Mushu    | MG711460  | Clustered | VC_271_0  | N8  | 13   | Faecalibacterium | Group 1      | Duplodnaviria | Heunggongvinae | Uroviricota | Caudoviricetes | n.a.         | Unclassified | O            | O             |
| S8-wms-combined_161181   | Clostridioides phage CD1801        | MW512570  | Clustered | VC_148_0  | N12 | 4    | Clostridioides   | Group 1      | Duplodnaviria | Heunggongvinae | Uroviricota | Caudoviricetes | n.a.         | Unclassified | O            | O             |
| S8-wms-combined_169855   | n.a.                               | n.a.      | Clustered | VC_915_0  | A   | n.a. | n.a.             | n.a.         | n.a.          | n.a.           | n.a.        | n.a.           | n.a.         | n.a.         | n.a.         | n.a.          |
| S8-wms-combined_186054   | Streptococcus phage Javan630       | MK448997  | Clustered | VC_626_0  | C5  | 72   | Streptococcus    | Group 1      | Duplodnaviria | Heunggongvinae | Uroviricota | Caudoviricetes | n.a.         | Unclassified | Unclassified | Unclassified  |
| S8-wms-combined_200168   | Faecalibacterium phage FP_Epona    | MG711462  | Clustered | VC_707_1  | C2  | 42   | Faecalibacterium | Group 1      | Duplodnaviria | Heunggongvinae | Uroviricota | Caudoviricetes | n.a.         | Unclassified | Unclassified | Eponavirus    |
| S8-wms-combined_211119   | n.a.                               | n.a.      | Clustered | VC_1236_0 | A   | n.a. | n.a.             | n.a.         | n.a.          | n.a.           | n.a.        | n.a.           | n.a.         | n.a.         | n.a.         | n.a.          |
| S8-wms-combined_215102   | n.a.                               | n.a.      | Clustered | VC_1504_0 | A   | n.a. | n.a.             | n.a.         | n.a.          | n.a.           | n.a.        | n.a.           | n.a.         | n.a.         | n.a.         | n.a.          |
| S8-wms-combined_217866   | Faecalibacterium phage FP_Epona    | MG711462  | Clustered | VC_707_1  | C4  | 84   | Faecalibacterium | Group 1      | Duplodnaviria | Heunggongvinae | Uroviricota | Caudoviricetes | n.a.         | Unclassified | Unclassified | Eponavirus    |
| S8-wms-combined_226076   | n.a.                               | n.a.      | Clustered | VC_1511_0 | F   | n.a. | n.a.             | n.a.         | n.a.          | n.a.           | n.a.        | n.a.           | n.a.         | n.a.         | n.a.         | n.a.          |
| S8-wms-combined_234473   | n.a.                               | n.a.      | Clustered | VC_1481_0 | F   | n.a. | n.a.             | n.a.         | n.a.          | n.a.           | n.a.        | n.a.           | n.a.         | n.a.         | n.a.         | n.a.          |
| S8-wms-combined_246185   | Akkermansia phage DTMo-2021a       | CP084202  | Clustered | VC_738_0  | N3  | 1    | Akkermansia      | Group 1      | Duplodnaviria | Heunggongvinae | Uroviricota | Caudoviricetes | n.a.         | Unclassified | O            | O             |
| S8-wms-combined_25607    | Faecalibacterium phage FP_Taranis  | MG711467  | Clustered | VC_1239_0 | N20 | 2    | Faecalibacterium | Group 1      | Duplodnaviria | Heunggongvinae | Uroviricota | Caudoviricetes | n.a.         | Unclassified | O            | O             |
| S8-wms-combined_26087    | Burkholderia phage BcepMu          | AY539836  | Clustered | VC_610_0  | N5  | 1    | Burkholderia     | Group 1      | Duplodnaviria | Heunggongvinae | Uroviricota | Caudoviricetes | n.a.         | Unclassified | O            | O             |
| S8-wms-combined_264711   | n.a.                               | n.a.      | Clustered | VC_1481_0 | F   | n.a. | n.a.             | n.a.         | n.a.          | n.a.           | n.a.        | n.a.           | n.a.         | n.a.         | n.a.         | n.a.          |
| S8-wms-combined_270362   | Phage vB_RanS_PIN03                | ON245412  | Clustered | VC_917_0  | N10 | 6    | Unspecified      | Group 1      | Duplodnaviria | Heunggongvinae | Uroviricota | Caudoviricetes | n.a.         | Unclassified | O            | O             |
| S8-wms-combined_276204   | n.a.                               | n.a.      | Clustered | VC_1501_0 | A   | n.a. | n.a.             | n.a.         | n.a.          | n.a.           | n.a.        | n.a.           | n.a.         | n.a.         | n.a.         | n.a.          |
| S8-wms-combined_276211   | Butyrivibrio virus Ceiwdwen        | MN882553  | Clustered | VC_1209_0 | N10 | 11   | Butyrivibrio     | Group 1      | Duplodnaviria | Heunggongvinae | Uroviricota | Caudoviricetes | n.a.         | Unclassified | O            | O             |
| S8-wms-combined_49369    | n.a.                               | n.a.      | Clustered | VC_1236_0 | A   | n.a. | n.a.             | n.a.         | n.a.          | n.a.           | n.a.        | n.a.           | n.a.         | n.a.         | n.a.         | n.a.          |
| S8-wms-combined_68780    | n.a.                               | n.a.      | Clustered | VC_271_0  | A   | n.a. | n.a.             | n.a.         | n.a.          | n.a.           | n.a.        | n.a.           | n.a.         | n.a.         | n.a.         | n.a.          |
| S8-wms-combined_72911    | n.a.                               | n.a.      | Clustered | VC_1076_0 | A   | n.a. | n.a.             | n.a.         | n.a.          | n.a.           | n.a.        | n.a.           | n.a.         | n.a.         | n.a.         | n.a.          |
| S8-wms-combined_97848    | Bacteroides phage p00              | BK010646  | Clustered | VC_677_0  | C4  | 36   | Bacteroides      | Group 1      | Duplodnaviria | Heunggongvinae | Uroviricota | Caudoviricetes | n.a.         | Unclassified | Unclassified | Unclassified  |
| S8-wms_127191            | Faecalibacterium phage FP_oengus   | MG711463  | Clustered | VC_804_2  | N2  | 66   | Faecalibacterium | Group 1      | Duplodnaviria | Heunggongvinae | Uroviricota | Caudoviricetes | n.a.         | Unclassified | O            | O             |
| S8-wms_152831            | Faecalibacterium phage FP_Toutatis | MG711466  | Clustered | VC_710_0  | C1  | 82   | Faecalibacterium | Group 1      | Duplodnaviria | Heunggongvinae | Uroviricota | Caudoviricetes | n.a.         | Unclassified | Unclassified | Toutatisvirus |
| S8-wms_244               |                                    |           |           |           |     |      |                  |              |               |                |             |                |              |              |              |               |

|                         |                                    |          |                     |           |     |      |                   |              |               |               |               |                    |               |              |              |                |
|-------------------------|------------------------------------|----------|---------------------|-----------|-----|------|-------------------|--------------|---------------|---------------|---------------|--------------------|---------------|--------------|--------------|----------------|
| S8-wms_82880            | Faecalibacterium phage FP_Brigit   | MG711465 | Clustered           | VC_606_0  | C3  | 104  | Faecalibacterium  | Group I      | Duplodnaviria | Heunggongvime | Urovincota    | Caudoviricetes     | n.a.          | Unclassified | Unclassified | Brigitvirus    |
| S9-wms-combined_105462  | Clostridioides phage phiCD27       | EU719189 | Clustered           | VC_825_0  | N9  | 3    | Clostridioides    | Group I      | Duplodnaviria | Heunggongvime | Urovincota    | Caudoviricetes     | n.a.          | Unclassified | O            | O              |
| S9-wms-combined_3507    | Streptococcus phage Javan422       | MK448934 | Clustered           | VC_626_0  | C1  | 52   | Streptococcus     | Group I      | Duplodnaviria | Heunggongvime | Urovincota    | Caudoviricetes     | n.a.          | Unclassified | Unclassified | Unclassified   |
| S9-wms-combined_26410   | Faecalibacterium phage FP_oengus   | MG711463 | Clustered           | VC_804_2  | N8  | 48   | Faecalibacterium  | Group I      | Duplodnaviria | Heunggongvime | Urovincota    | Caudoviricetes     | n.a.          | Unclassified | O            | O              |
| S9-wms-combined_28805   | Winogradskyella phage Petemella_1  | MT732475 | Clustered           | VC_676_1  | N11 | 18   | Winogradskyella   | Group I      | Duplodnaviria | Heunggongvime | Urovincota    | Caudoviricetes     | n.a.          | Unclassified | O            | O              |
| S9-wms-combined_31456   | Bacteroides phage p00              | BK010646 | Clustered           | VC_677_0  | C4  | 33   | Bacteroides       | Group I      | Duplodnaviria | Heunggongvime | Urovincota    | Caudoviricetes     | n.a.          | Unclassified | Unclassified | Unclassified   |
| S9-wms-combined_33229   | Bacteroides phage F2               | MT806187 | Clustered           | VC_1435_0 | N11 | 7    | Bacteroides       | Group I      | Duplodnaviria | Heunggongvime | Urovincota    | Caudoviricetes     | n.a.          | Unclassified | O            | O              |
| S9-wms-combined_33230   | Bacteroides phage F4               | MT806185 | Clustered           | VC_1435_0 | N11 | 3    | Bacteroides       | Group I      | Duplodnaviria | Heunggongvime | Urovincota    | Caudoviricetes     | n.a.          | Unclassified | O            | O              |
| S9-wms-combined_36459   | Streptococcus phage Javan553       | MK448804 | Clustered           | VC_338_0  | N6  | 6    | Streptococcus     | Group I      | Duplodnaviria | Heunggongvime | Urovincota    | Caudoviricetes     | n.a.          | Unclassified | O            | O              |
| S9-wms-combined_37587   | Phage vB_RanS_PIN03                | ON245412 | Clustered           | VC_1473_0 | N5  | 4    | Unspecified       | Group I      | Duplodnaviria | Heunggongvime | Urovincota    | Caudoviricetes     | n.a.          | Unclassified | O            | O              |
| S9-wms-combined_3878    | n.a.                               | n.a.     | Clustered           | VC_1510_0 | F   | n.a. | n.a.              | n.a.         | n.a.          | n.a.          | n.a.          | n.a.               | n.a.          | n.a.         | n.a.         | n.a.           |
| S9-wms-combined_44402   | Bacteroides phage p00              | BK010646 | Clustered           | VC_680_0  | N2  | 31   | Bacteroides       | Group I      | Duplodnaviria | Heunggongvime | Urovincota    | Caudoviricetes     | n.a.          | Unclassified | O            | O              |
| S9-wms-combined_53991   | Phage WC36-2                       | OL791266 | Clustered           | VC_947_0  | N1  | 24   | Unspecified       | Group I      | Duplodnaviria | Heunggongvime | Urovincota    | Caudoviricetes     | n.a.          | Unclassified | O            | O              |
| S9-wms-combined_5526    | Bacteroides phage LoVEphage        | MW660583 | Clustered           | VC_832_0  | N10 | 1    | Bacteroides       | Group I      | Duplodnaviria | Heunggongvime | Urovincota    | Caudoviricetes     | n.a.          | Unclassified | O            | O              |
| S9-wms-combined_56773   | n.a.                               | n.a.     | Clustered           | VC_1481_0 | F   | n.a. | n.a.              | n.a.         | n.a.          | n.a.          | n.a.          | n.a.               | n.a.          | n.a.         | n.a.         | n.a.           |
| S9-wms-combined_64277   | Burkholderia phage phiE255         | CP000622 | Clustered           | VC_250_0  | C1  | 83   | Burkholderia      | Group I      | Duplodnaviria | Heunggongvime | Urovincota    | Caudoviricetes     | n.a.          | Unclassified | Unclassified | Bcepmyovirus   |
| S9-wms-combined_71647   | Bacillus phage vB_BtS_BMBtp13      | KX190832 | Clustered           | VC_420_0  | N6  | 5    | Bacillus          | Group I      | Duplodnaviria | Heunggongvime | Urovincota    | Caudoviricetes     | n.a.          | Unclassified | O            | O              |
| S9-wms-combined_76274   | Bifidobacterium phage Bbif-1       | GQ141189 | Clustered           | VC_854_0  | N3  | 19   | Bifidobacterium   | Group I      | Duplodnaviria | Heunggongvime | Urovincota    | Caudoviricetes     | n.a.          | Unclassified | O            | O              |
| S9-wms-combined_89249   | Rosebunia phage Jekyll             | LR596902 | Clustered           | VC_947_0  | N4  | 3    | Rosebunia         | Group I      | Duplodnaviria | Heunggongvime | Urovincota    | Caudoviricetes     | n.a.          | Unclassified | O            | O              |
| S9-wms_104169           | Inovirus sp.                       | MT135285 | Clustered           | VC_1423_0 | C1  | 13   | Unspecified       | Group II     | Monodnaviria  | Loebvirine    | Hofneivirinae | Faserviricetes     | Tabulavirales | Inoviridae   | Unclassified | Inovirus       |
| S9-wms_128232           | Tortoise microvirus 13             | MK765563 | Clustered           | VC_1243_0 | C1  | 26   | Unspecified       | Group II     | Monodnaviria  | Sangervirine  | Phixviricota  | Malgrandaviricetes | Petitvirales  | Microviridae | Unclassified | Unclassified   |
| S9-wms_19025            | Lactococcus phage phiQ1            | AP019527 | Clustered           | VC_535_0  | N2  | 9    | Lactococcus       | Group I      | Duplodnaviria | Heunggongvime | Urovincota    | Caudoviricetes     | n.a.          | Unclassified | O            | O              |
| S9-wms_64472            | n.a.                               | n.a.     | Clustered           | VC_1512_0 | F   | n.a. | n.a.              | n.a.         | n.a.          | n.a.          | n.a.          | n.a.               | n.a.          | n.a.         | n.a.         | n.a.           |
| S1-wms-combined_220022  | n.a.                               | n.a.     | Clustered/Singleton | VC_1408_1 | A   | n.a. | n.a.              | n.a.         | n.a.          | n.a.          | n.a.          | n.a.               | n.a.          | n.a.         | n.a.         | n.a.           |
| S1-wms-combined_85225   | Propionibacterium phage Anatole    | KX620748 | Clustered/Singleton | VC_798_1  | N4  | 12   | Propionibacterium | Group I      | Duplodnaviria | Heunggongvime | Urovincota    | Caudoviricetes     | n.a.          | Unclassified | O            | O              |
| S1-wms_102342           | Bacillus phage vB_BcoS-136         | MH884508 | Clustered/Singleton | VC_719_0  | N2  | 1    | Bacillus          | Group I      | Duplodnaviria | Heunggongvime | Urovincota    | Caudoviricetes     | n.a.          | Unclassified | O            | O              |
| S11-wms-combined_264050 | Faecalibacterium phage FP_Epona    | MG711462 | Clustered/Singleton | VC_707_3  | C1  | 64   | Faecalibacterium  | Group I      | Duplodnaviria | Heunggongvime | Urovincota    | Caudoviricetes     | n.a.          | Unclassified | Unclassified | O              |
| S11-wms-combined_267993 | Bacillus phage BalMu-1             | KP063902 | Clustered/Singleton | VC_825_1  | N11 | 4    | Bacillus          | Group I      | Duplodnaviria | Heunggongvime | Urovincota    | Caudoviricetes     | n.a.          | Unclassified | O            | O              |
| S11-wms-combined_3507   | Butyrivibrio virus Cerdwen         | MN882553 | Clustered/Singleton | VC_1209_2 | N8  | 17   | Butyrivibrio      | Group I      | Duplodnaviria | Heunggongvime | Urovincota    | Caudoviricetes     | n.a.          | Unclassified | O            | O              |
| S12-wms-combined_129799 | Faecalibacterium phage FP_Epona    | MG711462 | Clustered/Singleton | VC_707_2  | C1  | 100  | Faecalibacterium  | Group I      | Duplodnaviria | Heunggongvime | Urovincota    | Caudoviricetes     | n.a.          | Unclassified | Unclassified | O              |
| S12-wms-combined_157167 | n.a.                               | n.a.     | Clustered/Singleton | VC_1489_0 | F   | n.a. | n.a.              | n.a.         | n.a.          | n.a.          | n.a.          | n.a.               | n.a.          | n.a.         | n.a.         | n.a.           |
| S12-wms-combined_201125 | Phage vB_RanS_PIN03                | ON245412 | Clustered/Singleton | VC_918_2  | N12 | 10   | Unspecified       | Group I      | Duplodnaviria | Heunggongvime | Urovincota    | Caudoviricetes     | n.a.          | Unclassified | O            | O              |
| S12-wms-combined_23517  | Butyrivibrio virus Cerdwen         | MN882553 | Clustered/Singleton | VC_1209_1 | N11 | 7    | Butyrivibrio      | Group I      | Duplodnaviria | Heunggongvime | Urovincota    | Caudoviricetes     | n.a.          | Unclassified | O            | O              |
| S12-wms-combined_323943 | Faecalibacterium phage FP_Taranis  | MG711467 | Clustered/Singleton | VC_711_1  | C1  | 110  | Faecalibacterium  | Group I      | Duplodnaviria | Heunggongvime | Urovincota    | Caudoviricetes     | n.a.          | Unclassified | Unclassified | O              |
| S12-wms-combined_358797 | Elizabethkingia phage TCUEAP3      | OK632026 | Clustered/Singleton | VC_678_0  | N11 | 9    | Elizabethkingia   | Group I      | Duplodnaviria | Heunggongvime | Urovincota    | Caudoviricetes     | n.a.          | Unclassified | O            | O              |
| S12-wms-combined_59046  | Streptococcus phage Javan630       | MK448997 | Clustered/Singleton | VC_626_2  | C5  | 48   | Streptococcus     | Group I      | Duplodnaviria | Heunggongvime | Urovincota    | Caudoviricetes     | n.a.          | Unclassified | Unclassified | O              |
| S17-wms-combined_186314 | Bifidobacterium phage Bbif-1       | GQ141189 | Clustered/Singleton | VC_798_2  | N5  | 15   | Bifidobacterium   | Group I      | Duplodnaviria | Heunggongvime | Urovincota    | Caudoviricetes     | n.a.          | Unclassified | O            | O              |
| S17-wms-combined_2234   | Faecalibacterium phage FP_Taranis  | MG711467 | Clustered/Singleton | VC_711_2  | C3  | 88   | Faecalibacterium  | Group I      | Duplodnaviria | Heunggongvime | Urovincota    | Caudoviricetes     | n.a.          | Unclassified | Unclassified | O              |
| S17-wms-combined_248321 | Faecalibacterium phage FP_Lagaffe  | MG711461 | Clustered/Singleton | VC_717_1  | C4  | 90   | Faecalibacterium  | Group I      | Duplodnaviria | Heunggongvime | Urovincota    | Caudoviricetes     | n.a.          | Unclassified | Unclassified | O              |
| S17-wms-combined_95360  | Clostridium phage phiCT453A        | KM983327 | Clustered/Singleton | VC_732_1  | N4  | 3    | Clostridium       | Group I      | Duplodnaviria | Heunggongvime | Urovincota    | Caudoviricetes     | n.a.          | Unclassified | O            | O              |
| S2-wms-combined_116221  | Butyrivibrio phage Idris           | MN882554 | Clustered/Singleton | VC_876_1  | N5  | 33   | Butyrivibrio      | Group I      | Duplodnaviria | Heunggongvime | Urovincota    | Caudoviricetes     | n.a.          | Unclassified | O            | O              |
| S2-wms-combined_13246   | Faecalibacterium phage FP_Toutatis | MG711466 | Clustered/Singleton | VC_710_4  | C2  | 69   | Faecalibacterium  | Group I      | Duplodnaviria | Heunggongvime | Urovincota    | Caudoviricetes     | n.a.          | Unclassified | Unclassified | O              |
| S2-wms-combined_137119  | Faecalibacterium phage FP_Toutatis | MG711466 | Clustered/Singleton | VC_710_1  | C8  | 55   | Faecalibacterium  | Group I      | Duplodnaviria | Heunggongvime | Urovincota    | Caudoviricetes     | n.a.          | Unclassified | Unclassified | O              |
| S2-wms-combined_140996  | Faecalibacterium phage FP_Taranis  | MG711467 | Clustered/Singleton | VC_711_3  | C2  | 76   | Faecalibacterium  | Group I      | Duplodnaviria | Heunggongvime | Urovincota    | Caudoviricetes     | n.a.          | Unclassified | Unclassified | O              |
| S2-wms-combined_157934  | Faecalibacterium phage FP_Mushu    | MG711460 | Clustered/Singleton | VC_1235_1 | C4  | 67   | Faecalibacterium  | Group I      | Duplodnaviria | Heunggongvime | Urovincota    | Caudoviricetes     | n.a.          | Unclassified | Unclassified | O              |
| S2-wms-combined_233107  | n.a.                               | n.a.     | Clustered/Singleton | VC_1485_0 | A   | n.a. | n.a.              | n.a.         | n.a.          | n.a.          | n.a.          | n.a.               | n.a.          | n.a.         | n.a.         | n.a.           |
| S2-wms-combined_24549   | Clostridioides phage JD03          | MT193276 | Clustered/Singleton | VC_651_0  | N8  | 10   | Clostridioides    | Group I      | Duplodnaviria | Heunggongvime | Urovincota    | Caudoviricetes     | n.a.          | Unclassified | O            | O              |
| S2-wms-combined_98888   | Faecalibacterium phage FP_oengus   | MG711463 | Clustered/Singleton | VC_804_3  | C9  | 41   | Faecalibacterium  | Group I      | Duplodnaviria | Heunggongvime | Urovincota    | Caudoviricetes     | n.a.          | Unclassified | Unclassified | O              |
| S5-wms-combined_108794  | Streptococcus phage Javan422       | MK448934 | Clustered/Singleton | VC_626_3  | C5  | 55   | Streptococcus     | Group I      | Duplodnaviria | Heunggongvime | Urovincota    | Caudoviricetes     | n.a.          | Unclassified | Unclassified | O              |
| S5-wms-combined_134743  | n.a.                               | n.a.     | Clustered/Singleton | VC_825_2  | A   | n.a. | n.a.              | n.a.         | n.a.          | n.a.          | n.a.          | n.a.               | n.a.          | n.a.         | n.a.         | n.a.           |
| S5-wms-combined_66662   | Campylobacter phage A11a           | MG065691 | Clustered/Singleton | VC_1219_1 | C1  | 8    | Campylobacter     | Unclassified | Unclassified  | n.a.          | n.a.          | n.a.               | n.a.          | Unclassified | Unclassified | O              |
| S5-wms-combined_72410   | Faecalibacterium phage FP_oengus   | MG711463 | Clustered/Singleton | VC_804_4  | C8  | 41   | Faecalibacterium  | Group I      | Duplodnaviria | Heunggongvime | Urovincota    | Caudoviricetes     | n.a.          | Unclassified | Unclassified | O              |
| S5-wms-combined_90315   | Phage vB_RanS_PIN03                | ON245412 | Clustered/Singleton | VC_917_1  | N9  | 10   | Unspecified       | Group I      | Duplodnaviria | Heunggongvime | Urovincota    | Caudoviricetes     | n.a.          | Unclassified | O            | O              |
| S5-wms_67169            | Rosebunia phage Shimadzu           | LR596903 | Clustered/Singleton | VC_914_0  | N3  | 5    | Rosebunia         | Group I      | Duplodnaviria | Heunggongvime | Urovincota    | Caudoviricetes     | n.a.          | Unclassified | O            | O              |
| S6-wms-combined_118427  | Faecalibacterium phage FP_Toutatis | MG711466 | Clustered/Singleton | VC_710_3  | C8  | 60   | Faecalibacterium  | Group I      | Duplodnaviria | Heunggongvime | Urovincota    | Caudoviricetes     | n.a.          | Unclassified | Unclassified | O              |
| S6-wms-combined_82597   | n.a.                               | n.a.     | Clustered/Singleton | VC_1435_1 | A   | n.a. | n.a.              | n.a.         | n.a.          | n.a.          | n.a.          | n.a.               | n.a.          | n.a.         | n.a.         | n.a.           |
| S7-wms-combined_157260  | Faecalibacterium phage FP_Toutatis | MG711466 | Clustered/Singleton | VC_710_2  | C11 | 24   | Faecalibacterium  | Group I      | Duplodnaviria | Heunggongvime | Urovincota    | Caudoviricetes     | n.a.          | Unclassified | Unclassified | O              |
| S7-wms-combined_169375  | n.a.                               | n.a.     | Clustered/Singleton | VC_1483_0 | A   | n.a. | n.a.              | n.a.         | n.a.          | n.a.          | n.a.          | n.a.               | n.a.          | n.a.         | n.a.         | n.a.           |
| S7-wms-combined_20921   | Bacillus phage PBC2                | KT070867 | Clustered/Singleton | VC_719_1  | N2  | 5    | Bacillus          | Group I      | Duplodnaviria | Heunggongvime | Urovincota    | Caudoviricetes     | n.a.          | Unclassified | O            | O              |
| S7-wms-combined_238231  | n.a.                               | n.a.     | Clustered/Singleton | VC_271_2  | A   | n.a. | n.a.              | n.a.         | n.a.          | n.a.          | n.a.          | n.a.               | n.a.          | n.a.         | n.a.         | n.a.           |
| S7-wms-combined_26217   | Phage vB_RanS_PIN03                | ON245412 | Clustered/Singleton | VC_918_1  | N12 | 9    | Unspecified       | Group I      | Duplodnaviria | Heunggongvime | Urovincota    | Caudoviricetes     | n.a.          | Unclassified | O            | O              |
| S7-wms-combined_3697    | Campylobacter phage A11a           | MG065691 | Clustered/Singleton | VC_832_1  | N13 | 2    | Campylobacter     | Unclassified | Unclassified  | n.a.          | n.a.          | n.a.               | n.a.          | Unclassified | O            | O              |
| S7-wms-combined_62119   | Bacteroides phage LoVEphage        | MW660583 | Clustered/Singleton | VC_1221_1 | C1  | 248  | Bacteroides       | Group I      | Duplodnaviria | Heunggongvime | Urovincota    | Caudoviricetes     | n.a.          | Unclassified | Unclassified | O              |
| S8-wms-combined_225114  | Faecalibacterium phage FP_Taranis  | MG711467 | Clustered/Singleton | VC_271_1  | N1  | 70   | Faecalibacterium  | Group I      | Duplodnaviria | Heunggongvime | Urovincota    | Caudoviricetes     | n.a.          | Unclassified | O            | O              |
| S8-wms-combined_40666   | n.a.                               | n.a.     | Clustered/Singleton | VC_1483_1 | A   | n.a. | n.a.              | n.a.         | n.a.          | n.a.          | n.a.          | n.a.               | n.a.          | n.a.         | n.a.         | n.a.           |
| S8-wms_111056           | Bacteroides phage crAss002         | MN917146 | Clustered/Singleton | VC_674_0  | N1  | 134  | Bacteroides       | Group I      | Duplodnaviria | Heunggongvime | Urovincota    | Caudoviricetes     | n.a.          | Unclassified | Crassvirales | Intestiviridae |
| S9-wms-combined_20485   | Streptococcus phage P0092          | KY705252 | Clustered/Singleton | VC_255_1  | C1  | 66   | Streptococcus     | Group I      | Duplodnaviria | Heunggongvime | Urovincota    | Caudoviricetes     | n.a.          | Unclassified | Unclassified | O              |
| S9-wms-combined_29611   | Faecalibacterium phage FP_Brigit   | MG711465 | Clustered/Singleton | VC_606_1  | C3  | 85   | Faecalibacterium  | Group I      | Duplodnaviria | Heunggongvime | Urovincota    | Caudoviricetes     | n.a.          | Unclassified | Unclassified | O              |
| S9-wms-combined_9931    | Erysipelothrix phage phi1605       | MF172979 | Clustered/Singleton | VC_626_1  | C6  | 58   | Erysipelothrix    | Group I      | Duplodnaviria | Heunggongvime | Urovincota    | Caudoviricetes     | n.a.          | Unclassified | Unclassified | O              |
| S1-wms-combined_102801  | n.a.                               | n.a.     | Outlier             | n.a.      | A   | n.a. | n.a.              | n.a.         | n.a.          | n.a.          | n.a.          | n.a.               | n.a.          | n.a.         | n.a.         | n.a.           |
| S1-wms-combined_116938  | Streptococcus phage Javan580       | MK448989 | Outlier             | n.a.      | N5  | 9    | Streptococcus     | Group I      | Duplodnaviria | Heunggongvime | Urovincota    | Caudoviricetes     | n.a.          | Unclassified | O            | O              |
| S1-wms-combined_131270  | Butyrivibrio virus Cerdwen         | MN882553 | Outlier             | n.a.      | N2  | 15   | Butyrivibrio      | Group I      | Duplodnaviria | Heunggongvime | Urovincota    | Caudoviricetes     | n.a.          | Unclassified | O            | O              |
| S1-wms-combined_136097  | n.a.                               | n.a.     | Outlier             | n.a.      | A   | n.a. | n.a.              | n.a.         | n.a.          | n.a.          | n.a.          | n.a.               | n.a.          | n.a.         | n.a.         | n.a.           |
| S1-wms-combined_143459  | Pseudomonas phage vB_Pac_CF5a      | MK511057 | Outlier             | n.a.      | N1  | 15   | Pseudomonas       | Group I      | Duplodnaviria | Heunggongvime | Urovincota    | Caudoviricetes     | n.a.          | Unclassified | O            | O              |
| S1-wms-combined_164894  | Faecalibacterium phage FP_Lugh     | MG711464 | Outlier             | n.a.      | N4  | 16   | Faecalibacterium  | Group I      | Duplodnaviria | Heunggongvime | Urovincota    | Caudoviricetes     | n.a.          | Unclassified | O            | O              |
| S1-wms-combined_186878  | n.a.                               | n.a.     | Outlier             | n.a.      | A   | n.a. | n.a.              | n.a.         | n.a.          | n.a.          | n.a.          | n.a.               | n.a.          | n.a.         | n.a.         | n.a.           |
| S1-wms-combined_212892  | Butyrivibrio virus Cerdwen         | MN882553 | Outlier             | n.a.      | N1  | 19   | Butyrivibrio      | Group I      | Duplodnaviria | Heunggongvime | Urovincota    | Caudoviricetes     | n.a.          | Unclassified | O            | O              |
| S1-wms-combined_227003  | n.a.                               | n.a.     | Outlier             | n.a.      | A   | n.a. | n.a.              | n.a.         | n.a.          | n.a.          | n.a.          | n.a.               | n.a.          | n.a.         | n.a.         | n.a.           |
| S1-wms-combined_227917  | Faecalibacterium phage FP_Lugh     | MG711464 | Outlier             | n.a.      | N2  | 15   | Faecalibacterium  | Group I      | Duplodnaviria | Heunggongvime | Urovincota    | Caudoviricetes     | n.a.          | Unclassified | O            | O              |
| S1-wms-combined_252439  | Bacillus phage vB_BpsS-140         | MI884512 | Outlier             | n.a.      | N1  | 2    | Bacillus          | Group I      | Duplodnaviria | Heunggongvime | Urovincota    | Caudoviricetes     | n.a.          | Unclassified | O            | O              |
| S1-wms-combined_2       |                                    |          |                     |           |     |      |                   |              |               |               |               |                    |               |              |              |                |

|                         |                                      |          |         |      |     |      |                   |              |               |               |             |                |      |                   |      |      |
|-------------------------|--------------------------------------|----------|---------|------|-----|------|-------------------|--------------|---------------|---------------|-------------|----------------|------|-------------------|------|------|
| S1-wms_208875           | Bacteroides phage ARB14              | MT074134 | Outlier | n.a. | N1  | 61   | Bacteroides       | Group 1      | Duplodnaviria | Heunggongvine | Uroviricota | Caudoviricetes | n.a. | Unclassified      | O    | O    |
| S1-wms_236105           | Rosebunia phage Jekyll               | LR596902 | Outlier | n.a. | N11 | 3    | Rosebunia         | Group 1      | Duplodnaviria | Heunggongvine | Uroviricota | Caudoviricetes | n.a. | Unclassified      | O    | O    |
| S1-wms_29288            | Faecalibacterium phage FP_Taranis    | MG711467 | Outlier | n.a. | N2  | 61   | Faecalibacterium  | Group 1      | Duplodnaviria | Heunggongvine | Uroviricota | Caudoviricetes | n.a. | Unclassified      | O    | O    |
| S1-wms_394571           | Bacteroides phage SJC03              | MT074146 | Outlier | n.a. | N1  | 36   | Bacteroides       | Group 1      | Duplodnaviria | Heunggongvine | Uroviricota | Caudoviricetes | n.a. | Unclassified      | O    | O    |
| S11-wms-combined_101337 | Klebsiella phage ST11-OXA245phi3.2   | MK416010 | Outlier | n.a. | N1  | 14   | Klebsiella        | Group 1      | Duplodnaviria | Heunggongvine | Uroviricota | Caudoviricetes | n.a. | Unclassified      | O    | O    |
| S11-wms-combined_112147 | n.a.                                 | n.a.     | Outlier | n.a. | A   | n.a. | n.a.              | n.a.         | n.a.          | n.a.          | n.a.        | n.a.           | n.a. | n.a.              | n.a. | n.a. |
| S11-wms-combined_112733 | Alteromonadaceae phage B23           | KY939598 | Outlier | n.a. | N1  | 18   | Unspecified       | Group 1      | Duplodnaviria | Heunggongvine | Uroviricota | Caudoviricetes | n.a. | Unclassified      | O    | O    |
| S11-wms-combined_116589 | n.a.                                 | n.a.     | Outlier | n.a. | A   | n.a. | n.a.              | n.a.         | n.a.          | n.a.          | n.a.        | n.a.           | n.a. | n.a.              | n.a. | n.a. |
| S11-wms-combined_14636  | Streptococcus phage Javan68          | MK449004 | Outlier | n.a. | N3  | 10   | Streptococcus     | Group 1      | Duplodnaviria | Heunggongvine | Uroviricota | Caudoviricetes | n.a. | Unclassified      | O    | O    |
| S11-wms-combined_168048 | Streptococcus phage Javan1           | MK448665 | Outlier | n.a. | N2  | 5    | Streptococcus     | Group 1      | Duplodnaviria | Heunggongvine | Uroviricota | Caudoviricetes | n.a. | Unclassified      | O    | O    |
| S11-wms-combined_215723 | Cellulophaga phage Ingeline_1        | MT732435 | Outlier | n.a. | N3  | 8    | Cellulophaga      | Group 1      | Duplodnaviria | Heunggongvine | Uroviricota | Caudoviricetes | n.a. | Duncviridae       | O    | O    |
| S11-wms-combined_236214 | Faecalibacterium phage FP_oengus     | MG711463 | Outlier | n.a. | N4  | 32   | Faecalibacterium  | Group 1      | Duplodnaviria | Heunggongvine | Uroviricota | Caudoviricetes | n.a. | Unclassified      | O    | O    |
| S11-wms-combined_282227 | Streptococcus phage Javan422         | MK448934 | Outlier | n.a. | N4  | 33   | Streptococcus     | Group 1      | Duplodnaviria | Heunggongvine | Uroviricota | Caudoviricetes | n.a. | Unclassified      | O    | O    |
| S11-wms-combined_329493 | n.a.                                 | n.a.     | Outlier | n.a. | A   | n.a. | n.a.              | n.a.         | n.a.          | n.a.          | n.a.        | n.a.           | n.a. | n.a.              | n.a. | n.a. |
| S11-wms-combined_63818  | Bacteroides phage LoVEphage          | MW660583 | Outlier | n.a. | N11 | 8    | Bacteroides       | Group 1      | Duplodnaviria | Heunggongvine | Uroviricota | Caudoviricetes | n.a. | Unclassified      | O    | O    |
| S11-wms_87293           | Yersinia phage YeP4                  | MK733262 | Outlier | n.a. | N1  | 1    | Yersinia          | Group 1      | Duplodnaviria | Heunggongvine | Uroviricota | Caudoviricetes | n.a. | Unclassified      | O    | O    |
| S12-wms-combined_151843 | Aeribacillus phage AP45              | KX965989 | Outlier | n.a. | N1  | 15   | Aeribacillus      | Group 1      | Duplodnaviria | Heunggongvine | Uroviricota | Caudoviricetes | n.a. | Unclassified      | O    | O    |
| S12-wms-combined_164656 | n.a.                                 | n.a.     | Outlier | n.a. | A   | n.a. | n.a.              | n.a.         | n.a.          | n.a.          | n.a.        | n.a.           | n.a. | n.a.              | n.a. | n.a. |
| S12-wms-combined_190114 | Bacteroides phage p00                | BK010646 | Outlier | n.a. | N10 | 18   | Bacteroides       | Group 1      | Duplodnaviria | Heunggongvine | Uroviricota | Caudoviricetes | n.a. | Unclassified      | O    | O    |
| S12-wms-combined_21504  | Acetobacter phage phiA01             | LC644971 | Outlier | n.a. | N1  | 10   | Acetobacter       | Group 1      | Duplodnaviria | Heunggongvine | Uroviricota | Caudoviricetes | n.a. | Unclassified      | O    | O    |
| S12-wms-combined_223043 | Faecalibacterium phage FP_Mushu      | MG711460 | Outlier | n.a. | N6  | 47   | Faecalibacterium  | Group 1      | Duplodnaviria | Heunggongvine | Uroviricota | Caudoviricetes | n.a. | Unclassified      | O    | O    |
| S12-wms-combined_264077 | Faecalibacterium phage FP_Toutatis   | MG711466 | Outlier | n.a. | N1  | 57   | Faecalibacterium  | Group 1      | Duplodnaviria | Heunggongvine | Uroviricota | Caudoviricetes | n.a. | Unclassified      | O    | O    |
| S12-wms-combined_293354 | Clostridium phage phiCP26F           | GQ434085 | Outlier | n.a. | N4  | 2    | Clostridium       | Group 1      | Duplodnaviria | Heunggongvine | Uroviricota | Caudoviricetes | n.a. | Unclassified      | O    | O    |
| S12-wms-combined_302876 | Clostridium phage phiCT453B          | KM493328 | Outlier | n.a. | N1  | 22   | Clostridium       | Group 1      | Duplodnaviria | Heunggongvine | Uroviricota | Caudoviricetes | n.a. | Unclassified      | O    | O    |
| S12-wms-combined_313953 | Acidithiobacillus phage AcaML1       | JX507079 | Outlier | n.a. | N1  | 25   | Acidithiobacillus | Group 1      | Duplodnaviria | Heunggongvine | Uroviricota | Caudoviricetes | n.a. | Unclassified      | O    | O    |
| S12-wms-combined_325418 | Streptococcus phage Javan422         | MK448934 | Outlier | n.a. | N9  | 13   | Streptococcus     | Group 1      | Duplodnaviria | Heunggongvine | Uroviricota | Caudoviricetes | n.a. | Unclassified      | O    | O    |
| S12-wms-combined_328554 | Elizabethkingia phage TCUEAP2        | OK632025 | Outlier | n.a. | N1  | 20   | Elizabethkingia   | Group 1      | Duplodnaviria | Heunggongvine | Uroviricota | Caudoviricetes | n.a. | Unclassified      | O    | O    |
| S12-wms-combined_359100 | Streptococcus phage Javan100         | MK448838 | Outlier | n.a. | N7  | 26   | Streptococcus     | Group 1      | Duplodnaviria | Heunggongvine | Uroviricota | Caudoviricetes | n.a. | Unclassified      | O    | O    |
| S12-wms-combined_368562 | Bacteroides phage p00                | BK010646 | Outlier | n.a. | N7  | 10   | Bacteroides       | Group 1      | Duplodnaviria | Heunggongvine | Uroviricota | Caudoviricetes | n.a. | Unclassified      | O    | O    |
| S12-wms-combined_371541 | n.a.                                 | n.a.     | Outlier | n.a. | A   | n.a. | n.a.              | n.a.         | n.a.          | n.a.          | n.a.        | n.a.           | n.a. | n.a.              | n.a. | n.a. |
| S12-wms-combined_48648  | n.a.                                 | n.a.     | Outlier | n.a. | A   | n.a. | n.a.              | n.a.         | n.a.          | n.a.          | n.a.        | n.a.           | n.a. | n.a.              | n.a. | n.a. |
| S12-wms-combined_63649  | n.a.                                 | n.a.     | Outlier | n.a. | A   | n.a. | n.a.              | n.a.         | n.a.          | n.a.          | n.a.        | n.a.           | n.a. | n.a.              | n.a. | n.a. |
| S12-wms_135291          | Streptococcus phage phi-SgaBSJ31_rum | MN270259 | Outlier | n.a. | N2  | 2    | Streptococcus     | Group 1      | Duplodnaviria | Heunggongvine | Uroviricota | Caudoviricetes | n.a. | Unclassified      | O    | O    |
| S12-wms_17950           | Butyrivibrio virus Anian             | MN882551 | Outlier | n.a. | N1  | 2    | Butyrivibrio      | Group 1      | Duplodnaviria | Heunggongvine | Uroviricota | Caudoviricetes | n.a. | Unclassified      | O    | O    |
| S12-wms_202803          | Faecalibacterium phage FP_Lagaffe    | MG711461 | Outlier | n.a. | N31 | 3    | Faecalibacterium  | Group 1      | Duplodnaviria | Heunggongvine | Uroviricota | Caudoviricetes | n.a. | Unclassified      | O    | O    |
| S12-wms_235125          | n.a.                                 | n.a.     | Outlier | n.a. | A   | n.a. | n.a.              | n.a.         | n.a.          | n.a.          | n.a.        | n.a.           | n.a. | n.a.              | n.a. | n.a. |
| S17-wms-combined_106940 | Riemerella phage RAP44               | HQ396194 | Outlier | n.a. | N1  | 20   | Riemerella        | Group 1      | Duplodnaviria | Heunggongvine | Uroviricota | Caudoviricetes | n.a. | Unclassified      | O    | O    |
| S17-wms-combined_140517 | Streptococcus phage Javan100         | MK448838 | Outlier | n.a. | N4  | 35   | Streptococcus     | Group 1      | Duplodnaviria | Heunggongvine | Uroviricota | Caudoviricetes | n.a. | Unclassified      | O    | O    |
| S17-wms-combined_146050 | n.a.                                 | n.a.     | Outlier | n.a. | A   | n.a. | n.a.              | n.a.         | n.a.          | n.a.          | n.a.        | n.a.           | n.a. | n.a.              | n.a. | n.a. |
| S17-wms-combined_171305 | Bacteroides phage LoVEphage          | MW660583 | Outlier | n.a. | N2  | 1    | Bacteroides       | Group 1      | Duplodnaviria | Heunggongvine | Uroviricota | Caudoviricetes | n.a. | Unclassified      | O    | O    |
| S17-wms-combined_185239 | n.a.                                 | n.a.     | Outlier | n.a. | A   | n.a. | n.a.              | n.a.         | n.a.          | n.a.          | n.a.        | n.a.           | n.a. | n.a.              | n.a. | n.a. |
| S17-wms-combined_17837  | Bacillus phage B13                   | OP066531 | Outlier | n.a. | N3  | 8    | Bacillus          | Group 1      | Duplodnaviria | Heunggongvine | Uroviricota | Caudoviricetes | n.a. | Unclassified      | O    | O    |
| S17-wms_235536          | n.a.                                 | n.a.     | Outlier | n.a. | F   | n.a. | n.a.              | n.a.         | n.a.          | n.a.          | n.a.        | n.a.           | n.a. | n.a.              | n.a. | n.a. |
| S2-wms-combined_110215  | Faecalibacterium phage FP_Bnigt      | MG711465 | Outlier | n.a. | N7  | 23   | Faecalibacterium  | Group 1      | Duplodnaviria | Heunggongvine | Uroviricota | Caudoviricetes | n.a. | Unclassified      | O    | O    |
| S2-wms-combined_126440  | Rosebunia phage Jekyll               | LR596902 | Outlier | n.a. | N2  | 9    | Rosebunia         | Group 1      | Duplodnaviria | Heunggongvine | Uroviricota | Caudoviricetes | n.a. | Unclassified      | O    | O    |
| S2-wms-combined_127080  | n.a.                                 | n.a.     | Outlier | n.a. | A   | n.a. | n.a.              | n.a.         | n.a.          | n.a.          | n.a.        | n.a.           | n.a. | n.a.              | n.a. | n.a. |
| S2-wms-combined_143737  | Cellulophaga phage Ingeline_1        | MT732435 | Outlier | n.a. | N5  | 2    | Cellulophaga      | Group 1      | Duplodnaviria | Heunggongvine | Uroviricota | Caudoviricetes | n.a. | Duncviridae       | O    | O    |
| S2-wms-combined_159670  | n.a.                                 | n.a.     | Outlier | n.a. | A   | n.a. | n.a.              | n.a.         | n.a.          | n.a.          | n.a.        | n.a.           | n.a. | n.a.              | n.a. | n.a. |
| S2-wms-combined_170845  | Streptococcus phage Javan261         | MK448720 | Outlier | n.a. | N8  | 16   | Streptococcus     | Group 1      | Duplodnaviria | Heunggongvine | Uroviricota | Caudoviricetes | n.a. | Unclassified      | O    | O    |
| S2-wms-combined_181391  | n.a.                                 | n.a.     | Outlier | n.a. | A   | n.a. | n.a.              | n.a.         | n.a.          | n.a.          | n.a.        | n.a.           | n.a. | n.a.              | n.a. | n.a. |
| S2-wms-combined_185494  | Delftia phage IME-DE1                | KR153873 | Outlier | n.a. | N8  | 4    | Delftia           | Group 1      | Duplodnaviria | Heunggongvine | Uroviricota | Caudoviricetes | n.a. | Autographiviridae | O    | O    |
| S2-wms-combined_190624  | n.a.                                 | n.a.     | Outlier | n.a. | A   | n.a. | n.a.              | n.a.         | n.a.          | n.a.          | n.a.        | n.a.           | n.a. | n.a.              | n.a. | n.a. |
| S2-wms-combined_191613  | n.a.                                 | n.a.     | Outlier | n.a. | A   | n.a. | n.a.              | n.a.         | n.a.          | n.a.          | n.a.        | n.a.           | n.a. | n.a.              | n.a. | n.a. |
| S2-wms-combined_199384  | Clostridioides phage phiCD08011      | MW512572 | Outlier | n.a. | N15 | 2    | Clostridioides    | Group 1      | Duplodnaviria | Heunggongvine | Uroviricota | Caudoviricetes | n.a. | Unclassified      | O    | O    |
| S2-wms-combined_200390  | Clostridium phage phiCD38-2          | HM568888 | Outlier | n.a. | N4  | 4    | Clostridium       | Group 1      | Duplodnaviria | Heunggongvine | Uroviricota | Caudoviricetes | n.a. | Unclassified      | O    | O    |
| S2-wms-combined_225908  | Campylobacter phage A11a             | MG065691 | Outlier | n.a. | N8  | 2    | Campylobacter     | Unclassified | Unclassified  | n.a.          | n.a.        | n.a.           | n.a. | Unclassified      | O    | O    |
| S2-wms-combined_25727   | Geobacillus phage GBSV1              | DQ340064 | Outlier | n.a. | N5  | 2    | Geobacillus       | Group 1      | Duplodnaviria | Heunggongvine | Uroviricota | Caudoviricetes | n.a. | Unclassified      | O    | O    |
| S2-wms-combined_51446   | n.a.                                 | n.a.     | Outlier | n.a. | F   | n.a. | n.a.              | n.a.         | n.a.          | n.a.          | n.a.        | n.a.           | n.a. | n.a.              | n.a. | n.a. |
| S2-wms-combined_52568   | n.a.                                 | n.a.     | Outlier | n.a. | A   | n.a. | n.a.              | n.a.         | n.a.          | n.a.          | n.a.        | n.a.           | n.a. | n.a.              | n.a. | n.a. |
| S2-wms-combined_5791    | Butyrivibrio phage Idris             | MN882554 | Outlier | n.a. | N4  | 15   | Butyrivibrio      | Group 1      | Duplodnaviria | Heunggongvine | Uroviricota | Caudoviricetes | n.a. | Unclassified      | O    | O    |
| S2-wms-combined_62839   | Bacillus phage PK-3                  | ON881243 | Outlier | n.a. | N1  | 9    | Bacillus          | Group 1      | Duplodnaviria | Heunggongvine | Uroviricota | Caudoviricetes | n.a. | Unclassified      | O    | O    |
| S2-wms-combined_72725   | n.a.                                 | n.a.     | Outlier | n.a. | A   | n.a. | n.a.              | n.a.         | n.a.          | n.a.          | n.a.        | n.a.           | n.a. | n.a.              | n.a. | n.a. |
| S2-wms-combined_74387   | Faecalibacterium phage FP_Lugh       | MG711464 | Outlier | n.a. | N4  | 10   | Faecalibacterium  | Group 1      | Duplodnaviria | Heunggongvine | Uroviricota | Caudoviricetes | n.a. | Unclassified      | O    | O    |
| S2-wms-combined_75144   | n.a.                                 | n.a.     | Outlier | n.a. | A   | n.a. | n.a.              | n.a.         | n.a.          | n.a.          | n.a.        | n.a.           | n.a. | n.a.              | n.a. | n.a. |
| S2-wms-combined_7756    | Akkermansia phage DTMo-2021a         | CP084202 | Outlier | n.a. | N3  | 11   | Akkermansia       | Group 1      | Duplodnaviria | Heunggongvine | Uroviricota | Caudoviricetes | n.a. | Unclassified      | O    | O    |
| S2-wms-combined_78670   | Bacillus phage vB_Bts_BMBtp15        | KX190835 | Outlier | n.a. | N3  | 6    | Bacillus          | Group 1      | Duplodnaviria | Heunggongvine | Uroviricota | Caudoviricetes | n.a. | Unclassified      | O    | O    |
| S2-wms-combined_84608   | Bordetella phage BPP-1               | AY029185 | Outlier | n.a. | N1  | 30   | Bordetella        | Group 1      | Duplodnaviria | Heunggongvine | Uroviricota | Caudoviricetes | n.a. | Unclassified      | O    | O    |
| S2-wms_246296           | n.a.                                 | n.a.     | Outlier | n.a. | A   | n.a. | n.a.              | n.a.         | n.a.          | n.a.          | n.a.        | n.a.           | n.a. | n.a.              | n.a. | n.a. |
| S2-wms_248324           | Clostridium phage phiCTP1            | HM159959 | Outlier | n.a. | N1  | 6    | Clostridium       | Group 1      | Duplodnaviria | Heunggongvine | Uroviricota | Caudoviricetes | n.a. | Unclassified      | O    | O    |
| S2-wms_248327           | n.a.                                 | n.a.     | Outlier | n.a. | F   | n.a. | n.a.              | n.a.         | n.a.          | n.a.          | n.a.        | n.a.           | n.a. | n.a.              | n.a. | n.a. |
| S2-wms_6424             | Tenacibaculum phage Gudel_1          | MT732474 | Outlier | n.a. | N1  | 8    | Tenacibaculum     | Group 1      | Duplodnaviria | Heunggongvine | Uroviricota | Caudoviricetes | n.a. | Pachyviridae      | O    | O    |
| S3-wms-combined_135428  | Propionibacterium phage Anatole      | KX620748 | Outlier | n.a. | N2  | 15   | Propionibacterium | Group 1      | Duplodnaviria | Heunggongvine | Uroviricota | Caudoviricetes | n.a. | Unclassified      | O    | O    |
| S3-wms-combined_45305   | Faecalibacterium phage FP_Lugh       | MG711464 | Outlier | n.a. | N2  | 19   | Faecalibacterium  | Group 1      | Duplodnaviria | Heunggongvine | Uroviricota | Caudoviricetes | n.a. | Unclassified      | O    | O    |
| S3-wms_94494            | Bifidobacterium phage PMBT6          | MH445112 | Outlier | n.a. | N1  | 29   | Bifidobacterium   | Group 1      | Duplodnaviria | Heunggongvine | Uroviricota | Caudoviricetes | n.a. | Unclassified      | O    | O    |
| S4-wms-combined_10758   | Cellulophaga phage phi17-2           | KC821609 | Outlier | n.a. | N1  | 7    | Cellulophaga      | Group 1      | Duplodnaviria | Heunggongvine | Uroviricota | Caudoviricetes | n.a. | Unclassified      | O    | O    |
| S4-wms-combined_118531  | Podoviridae sp.                      | MW202722 | Outlier | n.a. | N1  | 8    | Unspecified       | Group 1      | Duplodnaviria | Heunggongvine | Uroviricota | Caudoviricetes | n.a. | Unclassified      | O    | O    |
| S4-wms-combined_121978  | Gantherella phage vB_Gva_AB1         | MW387018 | Outlier | n.a. | N5  | 36   | Gantherella       | Group 1      | Duplodnaviria | Heunggongvine | Uroviricota | Caudoviricetes | n.a. | Unclassified      | O    | O    |
| S4-wms-combined_1246    | n.a.                                 | n.a.     | Outlier | n.a. | A   | n.a. | n.a.              | n.a.         | n.a.          | n.a.          | n.a.        | n.a.           | n.a. | n.a.              | n.a. | n.a. |
| S4-wms-combined_22012   | Propionibacterium phage B3           | KX630749 | Outlier | n.a. | N3  | 16   | Propionibacterium | Group 1      | Duplodnaviria | Heunggongvine | Uroviricota | Caudoviricetes | n.a. | Unclassified      | O    | O    |
| S4-wms-combined_25201   | Streptococcus phage SM1              | AY007505 | Outlier | n.a. | N7  | 5    | Streptococcus     | Group 1      | Duplodnaviria | Heunggongvine | Uroviricota | Caudoviricetes | n.a. | Unclassified      | O    | O    |
| S4-wms-combined_83492   | Bacteroides phage p00                | BK010646 | Outlier | n.a. | N9  | 18   | Bacteroides       | Group 1      | Duplodnaviria | Heunggongvine | Uroviricota | Caudoviricetes | n.a. | Unclassified      | O    | O    |
| S4-wms_114120           | Pectobacterium phage DU_PP_III       | MF979562 | Outlier | n.a. | N1  | 9    | Pectobacterium    | Group 1      | Duplodnaviria | Heunggongvine | Uroviricota | Caudoviricetes | n.a. | Unclassified      | O    | O    |
| S4-wms_50475            | Phage vB_RanS_PJN03                  | ON245412 | Outlier | n.a. | N10 | 3    | Unspecified       | Group 1      | Duplodnaviria | Heunggongvine | Uroviricota | Caudoviricetes | n.a. | Unclassified      | O    | O    |
| S5-wms-combined_117095  | n.a.                                 | n.a.     | Outlier | n.a. | A   | n.a. | n.a.              | n.a.         | n.a.          | n.a.          | n.a.        | n.a.           | n.a. | n.a.              | n.a. | n.a. |
| S5-wms-combined_156329  | Geobacillus phage GBSV1              | DQ340064 | Outlier | n.a. | N7  | 4    | Geobacillus       | Group 1      | Duplodnaviria | Heunggongvine | Uroviricota | Caudoviricetes | n.a. | Unclassified      | O    | O    |
| S5-wms-combined_161191  | n.a.                                 | n.a.     | Outlier | n.a. | A   | n.a. | n.a.              | n.a.         | n.a.          |               |             |                |      |                   |      |      |

|                          |                                   |          |                                |      |     |      |                  |              |               |               |              |                    |              |                |              |      |
|--------------------------|-----------------------------------|----------|--------------------------------|------|-----|------|------------------|--------------|---------------|---------------|--------------|--------------------|--------------|----------------|--------------|------|
| S5-wms-combined_175145   | Streptococcus phage Javan90       | MK449010 | Outlier                        | n.a. | N1  | 14   | Streptococcus    | Group I      | Duplodnaviria | Heunggongvine | Uroviricota  | Caudoviricetes     | n.a.         | Unclassified   | O            | O    |
| S5-wms-combined_179241   | n.a.                              | n.a.     | Outlier                        | n.a. | A   | n.a. | n.a.             | n.a.         | n.a.          | n.a.          | n.a.         | n.a.               | n.a.         | n.a.           | n.a.         | n.a. |
| S5-wms-combined_204782   | n.a.                              | n.a.     | Outlier                        | n.a. | A   | n.a. | n.a.             | n.a.         | n.a.          | n.a.          | n.a.         | n.a.               | n.a.         | n.a.           | n.a.         | n.a. |
| S5-wms-combined_3201     | Yersinia phage YeP1               | MK733259 | Outlier                        | n.a. | N1  | 26   | Yersinia         | Group I      | Duplodnaviria | Heunggongvine | Uroviricota  | Caudoviricetes     | n.a.         | Unclassified   | O            | O    |
| S5-wms-combined_94482    | n.a.                              | n.a.     | Outlier                        | n.a. | A   | n.a. | n.a.             | n.a.         | n.a.          | n.a.          | n.a.         | n.a.               | n.a.         | n.a.           | n.a.         | n.a. |
| S5-wms_164032            | Lactococcus phage vB_LacS_15      | MN337887 | Outlier                        | n.a. | N1  | 46   | Lactococcus      | Group I      | Duplodnaviria | Heunggongvine | Uroviricota  | Caudoviricetes     | n.a.         | Unclassified   | O            | O    |
| S6-wms-combined_56464    | Faecalibacterium phage FP_Lugh    | MG711464 | Outlier                        | n.a. | N8  | 10   | Faecalibacterium | Group I      | Duplodnaviria | Heunggongvine | Uroviricota  | Caudoviricetes     | n.a.         | Unclassified   | O            | O    |
| S6-wms_140743            | Bacillus phage vB_BpsS-140        | MB884512 | Outlier                        | n.a. | N1  | 4    | Bacillus         | Group I      | Duplodnaviria | Heunggongvine | Uroviricota  | Caudoviricetes     | n.a.         | Unclassified   | O            | O    |
| S7-wms-combined_106253   | Listeria phage LWP01              | CP011103 | Outlier                        | n.a. | N5  | 5    | Listeria         | Group I      | Duplodnaviria | Heunggongvine | Uroviricota  | Caudoviricetes     | n.a.         | Unclassified   | O            | O    |
| S7-wms-combined_107679_1 | Riemerella phage RAP44            | HQ396194 | Outlier                        | n.a. | N1  | 7    | Riemerella       | Group I      | Duplodnaviria | Heunggongvine | Uroviricota  | Caudoviricetes     | n.a.         | Unclassified   | O            | O    |
| S7-wms-combined_135154   | n.a.                              | n.a.     | Outlier                        | n.a. | A   | n.a. | n.a.             | n.a.         | n.a.          | n.a.          | n.a.         | n.a.               | n.a.         | n.a.           | n.a.         | n.a. |
| S7-wms-combined_135154   | Enterococcus phage phiFLAA        | GQ478088 | Outlier                        | n.a. | N1  | 10   | Enterococcus     | Group I      | Duplodnaviria | Heunggongvine | Uroviricota  | Caudoviricetes     | n.a.         | Unclassified   | O            | O    |
| S7-wms-combined_156351   | n.a.                              | n.a.     | Outlier                        | n.a. | A   | n.a. | n.a.             | n.a.         | n.a.          | n.a.          | n.a.         | n.a.               | n.a.         | n.a.           | n.a.         | n.a. |
| S7-wms-combined_174935   | Bifidobacterium phage Bbif-1      | GQJ41189 | Outlier                        | n.a. | N2  | 8    | Bifidobacterium  | Group I      | Duplodnaviria | Heunggongvine | Uroviricota  | Caudoviricetes     | n.a.         | Unclassified   | O            | O    |
| S7-wms-combined_190281   | n.a.                              | n.a.     | Outlier                        | n.a. | A   | n.a. | n.a.             | n.a.         | n.a.          | n.a.          | n.a.         | n.a.               | n.a.         | n.a.           | n.a.         | n.a. |
| S7-wms-combined_2122     | Bacteriophage sp.                 | LT996075 | Outlier                        | n.a. | N1  | 11   | Unspecified      | Unclassified | n.a.          | Unclassified  | n.a.         | n.a.               | n.a.         | n.a.           | n.a.         | n.a. |
| S7-wms-combined_21693    | Streptococcus phage Javan100      | MK448838 | Outlier                        | n.a. | N5  | 38   | Streptococcus    | Group I      | Duplodnaviria | Heunggongvine | Uroviricota  | Caudoviricetes     | n.a.         | Unclassified   | O            | O    |
| S7-wms-combined_217226   | Pseudomonas phage BHU-1           | OK638201 | Outlier                        | n.a. | N1  | 8    | Pseudomonas      | Group I      | Duplodnaviria | Heunggongvine | Uroviricota  | Caudoviricetes     | n.a.         | Unclassified   | O            | O    |
| S7-wms-combined_218379   | Butyrivibrio virus Anian          | MN882551 | Outlier                        | n.a. | N1  | 24   | Butyrivibrio     | Group I      | Duplodnaviria | Heunggongvine | Uroviricota  | Caudoviricetes     | n.a.         | Unclassified   | O            | O    |
| S7-wms-combined_224523   | Clostridium phage phiCD38-2       | HM568888 | Outlier                        | n.a. | N8  | 2    | Clostridium      | Group I      | Duplodnaviria | Heunggongvine | Uroviricota  | Caudoviricetes     | n.a.         | Unclassified   | O            | O    |
| S7-wms-combined_3669     | Microviridae sp.                  | MG945130 | Outlier                        | n.a. | N1  | 5    | Unspecified      | Group II     | Monodnaviria  | Sangervirae   | Phixviricota | Malgrandaviricetes | Petitvirales | Microviridae   | O            | O    |
| S7-wms-combined_69024    | Streptococcus phage OlisA2        | OL774869 | Outlier                        | n.a. | N1  | 26   | Streptococcus    | Group I      | Duplodnaviria | Heunggongvine | Uroviricota  | Caudoviricetes     | n.a.         | Unclassified   | O            | O    |
| S7-wms-combined_71592    | Streptococcus phage Javan583      | MK448814 | Outlier                        | n.a. | N1  | 26   | Streptococcus    | Group I      | Duplodnaviria | Heunggongvine | Uroviricota  | Caudoviricetes     | n.a.         | Unclassified   | O            | O    |
| S7-wms-combined_74829    | Streptococcus phage Javan199      | MK448702 | Outlier                        | n.a. | N2  | 9    | Streptococcus    | Group I      | Duplodnaviria | Heunggongvine | Uroviricota  | Caudoviricetes     | n.a.         | Unclassified   | O            | O    |
| S7-wms_151112            | Butyrivibrio virus Anian          | MN882551 | Outlier                        | n.a. | N1  | 14   | Butyrivibrio     | Group I      | Duplodnaviria | Heunggongvine | Uroviricota  | Caudoviricetes     | n.a.         | Unclassified   | O            | O    |
| S7-wms_76437             | n.a.                              | n.a.     | Outlier                        | n.a. | A   | n.a. | n.a.             | n.a.         | n.a.          | n.a.          | n.a.         | n.a.               | n.a.         | n.a.           | n.a.         | n.a. |
| S8-wms-combined_117281   | Streptococcus phage Javan105      | MK448667 | Outlier                        | n.a. | N12 | 21   | Streptococcus    | Group I      | Duplodnaviria | Heunggongvine | Uroviricota  | Caudoviricetes     | n.a.         | Unclassified   | O            | O    |
| S8-wms-combined_164289   | n.a.                              | n.a.     | Outlier                        | n.a. | A   | n.a. | n.a.             | n.a.         | n.a.          | n.a.          | n.a.         | n.a.               | n.a.         | n.a.           | n.a.         | n.a. |
| S8-wms-combined_180957   | Bacterioides phage p00            | BK010646 | Outlier                        | n.a. | N9  | 15   | Bacterioides     | Group I      | Duplodnaviria | Heunggongvine | Uroviricota  | Caudoviricetes     | n.a.         | Unclassified   | O            | O    |
| S8-wms-combined_185611   | n.a.                              | n.a.     | Outlier                        | n.a. | A   | n.a. | n.a.             | n.a.         | n.a.          | n.a.          | n.a.         | n.a.               | n.a.         | n.a.           | n.a.         | n.a. |
| S8-wms-combined_23583    | n.a.                              | n.a.     | Outlier                        | n.a. | A   | n.a. | n.a.             | n.a.         | n.a.          | n.a.          | n.a.         | n.a.               | n.a.         | n.a.           | n.a.         | n.a. |
| S8-wms-combined_239791   | Olleya phage Hareka_1             | MT732457 | Outlier                        | n.a. | N4  | 3    | Olleya           | Group I      | Duplodnaviria | Heunggongvine | Uroviricota  | Caudoviricetes     | n.a.         | Aggregaviridae | O            | O    |
| S8-wms-combined_48046    | n.a.                              | n.a.     | Outlier                        | n.a. | A   | n.a. | n.a.             | n.a.         | n.a.          | n.a.          | n.a.         | n.a.               | n.a.         | n.a.           | n.a.         | n.a. |
| S8-wms-combined_74275    | Bacterioides phage F2             | MT806186 | Outlier                        | n.a. | N2  | 5    | Bacterioides     | Group I      | Duplodnaviria | Heunggongvine | Uroviricota  | Caudoviricetes     | n.a.         | Unclassified   | O            | O    |
| S8-wms-combined_81597    | Bacterioides phage p00            | BK010646 | Outlier                        | n.a. | N9  | 20   | Bacterioides     | Group I      | Duplodnaviria | Heunggongvine | Uroviricota  | Caudoviricetes     | n.a.         | Unclassified   | O            | O    |
| S8-wms_113693            | Streptococcus phage Javan553      | MK448804 | Outlier                        | n.a. | N3  | 9    | Streptococcus    | Group I      | Duplodnaviria | Heunggongvine | Uroviricota  | Caudoviricetes     | n.a.         | Unclassified   | O            | O    |
| S8-wms_190781            | Clostridium phage phiMMP01        | LN681541 | Outlier                        | n.a. | N7  | 11   | Clostridium      | Group I      | Duplodnaviria | Heunggongvine | Uroviricota  | Caudoviricetes     | n.a.         | Unclassified   | O            | O    |
| S8-wms_58515             | n.a.                              | n.a.     | Outlier                        | n.a. | A   | n.a. | n.a.             | n.a.         | n.a.          | n.a.          | n.a.         | n.a.               | n.a.         | n.a.           | n.a.         | n.a. |
| S9-wms-combined_109322   | Streptococcus phage Javan74       | MK449005 | Outlier                        | n.a. | N1  | 26   | Streptococcus    | Group I      | Duplodnaviria | Heunggongvine | Uroviricota  | Caudoviricetes     | n.a.         | Unclassified   | O            | O    |
| S9-wms-combined_122742   | n.a.                              | n.a.     | Outlier                        | n.a. | A   | n.a. | n.a.             | n.a.         | n.a.          | n.a.          | n.a.         | n.a.               | n.a.         | n.a.           | n.a.         | n.a. |
| S9-wms-combined_124857   | n.a.                              | n.a.     | Outlier                        | n.a. | A   | n.a. | n.a.             | n.a.         | n.a.          | n.a.          | n.a.         | n.a.               | n.a.         | n.a.           | n.a.         | n.a. |
| S9-wms-combined_2042     | n.a.                              | n.a.     | Outlier                        | n.a. | A   | n.a. | n.a.             | n.a.         | n.a.          | n.a.          | n.a.         | n.a.               | n.a.         | n.a.           | n.a.         | n.a. |
| S9-wms-combined_3461     | n.a.                              | n.a.     | Outlier                        | n.a. | A   | n.a. | n.a.             | n.a.         | n.a.          | n.a.          | n.a.         | n.a.               | n.a.         | n.a.           | n.a.         | n.a. |
| S9-wms-combined_93232    | Klebsiella phage ST101-KPC2phi6.3 | MK416017 | Outlier                        | n.a. | N1  | 72   | Klebsiella       | Group I      | Duplodnaviria | Heunggongvine | Uroviricota  | Caudoviricetes     | n.a.         | Unclassified   | O            | O    |
| S9-wms_114971            | Clostridium phage phiMMP04        | JX145342 | Outlier                        | n.a. | N1  | 13   | Clostridium      | Group I      | Duplodnaviria | Heunggongvine | Uroviricota  | Caudoviricetes     | n.a.         | Unclassified   | O            | O    |
| S12-wms-combined_148741  | n.a.                              | n.a.     | Overlap (VC_1103/VC_1240)      | n.a. | A   | n.a. | n.a.             | n.a.         | n.a.          | n.a.          | n.a.         | n.a.               | n.a.         | n.a.           | n.a.         | n.a. |
| S12-wms-combined_270839  | n.a.                              | n.a.     | Overlap (VC_1103/VC_1240)      | n.a. | A   | n.a. | n.a.             | n.a.         | n.a.          | n.a.          | n.a.         | n.a.               | n.a.         | n.a.           | n.a.         | n.a. |
| S1-wms-combined_52708    | n.a.                              | n.a.     | Overlap (VC_1221/VC_1237)      | n.a. | A   | n.a. | n.a.             | n.a.         | n.a.          | n.a.          | n.a.         | n.a.               | n.a.         | n.a.           | n.a.         | n.a. |
| S17-wms-combined_56061   | n.a.                              | n.a.     | Overlap (VC_1221/VC_1237)      | n.a. | A   | n.a. | n.a.             | n.a.         | n.a.          | n.a.          | n.a.         | n.a.               | n.a.         | n.a.           | n.a.         | n.a. |
| S2-wms-combined_181849   | n.a.                              | n.a.     | Overlap (VC_1221/VC_1237)      | n.a. | A   | n.a. | n.a.             | n.a.         | n.a.          | n.a.          | n.a.         | n.a.               | n.a.         | n.a.           | n.a.         | n.a. |
| S2-wms-combined_57293    | Campylobacter phage A11a          | MG065691 | Overlap (VC_1221/VC_1237)      | n.a. | N11 | 5    | Campylobacter    | Unclassified | Unclassified  | n.a.          | n.a.         | n.a.               | n.a.         | Unclassified   | O            | O    |
| S6-wms-combined_110950   | n.a.                              | n.a.     | Overlap (VC_1221/VC_1237)      | n.a. | A   | n.a. | n.a.             | n.a.         | n.a.          | n.a.          | n.a.         | n.a.               | n.a.         | n.a.           | n.a.         | n.a. |
| S6-wms-combined_138710   | n.a.                              | n.a.     | Overlap (VC_1221/VC_1237)      | n.a. | A   | n.a. | n.a.             | n.a.         | n.a.          | n.a.          | n.a.         | n.a.               | n.a.         | n.a.           | n.a.         | n.a. |
| S7-wms-combined_137858   | n.a.                              | n.a.     | Overlap (VC_1221/VC_1237)      | n.a. | A   | n.a. | n.a.             | n.a.         | n.a.          | n.a.          | n.a.         | n.a.               | n.a.         | n.a.           | n.a.         | n.a. |
| S12-wms-combined_75733   | Tortoise microvirus 19            | MK765569 | Overlap (VC_1244/VC_1245)      | n.a. | N2  | 9    | Unspecified      | Group II     | Monodnaviria  | Sangervirae   | Phixviricota | Malgrandaviricetes | Petitvirales | Microviridae   | O            | O    |
| S8-wms_270               | Tortoise microvirus 19            | MK765569 | Overlap (VC_1244/VC_1245)      | n.a. | N2  | 9    | Unspecified      | Group II     | Monodnaviria  | Sangervirae   | Phixviricota | Malgrandaviricetes | Petitvirales | Microviridae   | O            | O    |
| S1-wms-combined_153670   | n.a.                              | n.a.     | Overlap (VC_1245/VC_1487)      | n.a. | A   | n.a. | n.a.             | n.a.         | n.a.          | n.a.          | n.a.         | n.a.               | n.a.         | n.a.           | n.a.         | n.a. |
| S1-wms_153615            | n.a.                              | n.a.     | Overlap (VC_1245/VC_1487)      | n.a. | A   | n.a. | n.a.             | n.a.         | n.a.          | n.a.          | n.a.         | n.a.               | n.a.         | n.a.           | n.a.         | n.a. |
| S12-wms-combined_132907  | Clostridium phage phiCT453A       | KM983327 | Overlap (VC_138/VC_146)        | n.a. | C5  | 31   | Clostridium      | Group I      | Duplodnaviria | Heunggongvine | Uroviricota  | Caudoviricetes     | n.a.         | Unclassified   | Unclassified | O    |
| S12-wms-combined_52101   | Thermus phage phi OH2             | AB823818 | Overlap (VC_138/VC_146)        | n.a. | C11 | 15   | Thermus          | Group I      | Duplodnaviria | Heunggongvine | Uroviricota  | Caudoviricetes     | n.a.         | Unclassified   | Unclassified | O    |
| S17-wms-combined_258087  | Thermus phage phi OH2             | AB823818 | Overlap (VC_138/VC_146)        | n.a. | C25 | 9    | Thermus          | Group I      | Duplodnaviria | Heunggongvine | Uroviricota  | Caudoviricetes     | n.a.         | Unclassified   | Unclassified | O    |
| S17-wms_106671           | Clostridium phage phiCT9441A      | KM983329 | Overlap (VC_138/VC_146)        | n.a. | C11 | 23   | Clostridium      | Group I      | Duplodnaviria | Heunggongvine | Uroviricota  | Caudoviricetes     | n.a.         | Unclassified   | Unclassified | O    |
| S2-wms-combined_135014   | Thermus phage phi OH2             | AB823818 | Overlap (VC_138/VC_146)        | n.a. | C29 | 10   | Thermus          | Group I      | Duplodnaviria | Heunggongvine | Uroviricota  | Caudoviricetes     | n.a.         | Unclassified   | Unclassified | O    |
| S2-wms-combined_207000   | Clostridium phage phiCT9441A      | KM983329 | Overlap (VC_138/VC_146)        | n.a. | C11 | 22   | Clostridium      | Group I      | Duplodnaviria | Heunggongvine | Uroviricota  | Caudoviricetes     | n.a.         | Unclassified   | Unclassified | O    |
| S2-wms-combined_58563    | Thermus phage phi OH2             | AB823818 | Overlap (VC_138/VC_146)        | n.a. | C27 | 13   | Thermus          | Group I      | Duplodnaviria | Heunggongvine | Uroviricota  | Caudoviricetes     | n.a.         | Unclassified   | Unclassified | O    |
| S2-wms_245232            | Thermus phage phi OH2             | AB823818 | Overlap (VC_138/VC_146)        | n.a. | C17 | 19   | Thermus          | Group I      | Duplodnaviria | Heunggongvine | Uroviricota  | Caudoviricetes     | n.a.         | Unclassified   | Unclassified | O    |
| S8-wms-combined_219796   | Thermus phage phi OH2             | AB823818 | Overlap (VC_138/VC_146)        | n.a. | C1  | 19   | Thermus          | Group I      | Duplodnaviria | Heunggongvine | Uroviricota  | Caudoviricetes     | n.a.         | Unclassified   | Unclassified | O    |
| S8-wms_20528             | Clostridium phage phiCT453A       | KM983327 | Overlap (VC_138/VC_146)        | n.a. | C15 | 28   | Clostridium      | Group I      | Duplodnaviria | Heunggongvine | Uroviricota  | Caudoviricetes     | n.a.         | Unclassified   | Unclassified | O    |
| S9-wms-combined_105822   | Thermus phage phi OH2             | AB823818 | Overlap (VC_138/VC_146)        | n.a. | C1  | 25   | Thermus          | Group I      | Duplodnaviria | Heunggongvine | Uroviricota  | Caudoviricetes     | n.a.         | Unclassified   | Unclassified | O    |
| S9-wms-combined_97755    | Clostridium phage phiCT9441A      | KM983329 | Overlap (VC_138/VC_146)        | n.a. | C7  | 30   | Clostridium      | Group I      | Duplodnaviria | Heunggongvine | Uroviricota  | Caudoviricetes     | n.a.         | Unclassified   | Unclassified | O    |
| S1-wms_265285            | Thermus phage phi OH2             | AB823818 | Overlap (VC_138/VC_146/VC_147) | n.a. | C25 | 16   | Thermus          | Group I      | Duplodnaviria | Heunggongvine | Uroviricota  | Caudoviricetes     | n.a.         | Unclassified   | Unclassified | O    |
| S12-wms_161239           | Thermus phage phi OH2             | AB823818 | Overlap (VC_138/VC_146/VC_147) | n.a. | C21 | 4    | Thermus          | Group I      | Duplodnaviria | Heunggongvine | Uroviricota  | Caudoviricetes     | n.a.         | Unclassified   | Unclassified | O    |
| S17-wms_116248           | Thermus phage phi OH2             | AB823818 | Overlap (VC_138/VC_146/VC_147) | n.a. | C23 | 17   | Thermus          | Group I      | Duplodnaviria | Heunggongvine | Uroviricota  | Caudoviricetes     | n.a.         | Unclassified   | Unclassified | O    |
| S17-wms_20082            | Thermus phage phi OH2             | AB823818 | Overlap (VC_138/VC_146/VC_147) | n.a. | C25 | 15   | Thermus          | Group I      | Duplodnaviria | Heunggongvine | Uroviricota  | Caudoviricetes     | n.a.         | Unclassified   | Unclassified | O    |
| S4-wms-combined_57963    | Thermus phage phi OH2             | AB823818 | Overlap (VC_138/VC_146/VC_147) | n.a. | C25 | 11   | Thermus          | Group I      | Duplodnaviria | Heunggongvine | Uroviricota  | Caudoviricetes     | n.a.         | Unclassified   | Unclassified | O    |
| S17-wms-combined_66123   | Thermus phage phi OH2             | AB823818 | Overlap (VC_138/VC_146/VC_148) | n.a. | C29 | 10   | Thermus          | Group I      | Duplodnaviria | Heunggongvine | Uroviricota  | Caudoviricetes     | n.a.         | Unclassified   | Unclassified | O    |
| S17-wms-combined_75892   | Psychrobacillus phage PVJ1        | MZ983385 | Overlap (VC_138/VC_146/VC_148) | n.a. | C27 | 10   | Psychrobacillus  | Group I      | Duplodnaviria | Heunggongvine | Uroviricota  | Caudoviricetes     | n.a.         | Unclassified   | Unclassified | O    |
| S2-wms-combined_124547   | Thermus phage phi OH2             | AB823818 | Overlap (VC_138/VC_146/VC_148) | n.a. | C33 | 8    | Thermus          | Group I      | Duplodnaviria | Heunggongvine | Uroviricota  | Caudoviricetes     | n.a.         | Unclassified   | Unclassified | O    |
| S1-wms-combined_373308   | n.a.                              | n.a.     | Overlap (VC_1483/VC_1490)      | n.a. | F   | n.a. | n.a.             | n.a.         | n.a.          | n.a.          | n.a.         | n.a.               | n.a.         | n.a.           | n.a.         | n.a. |
| S5-wms-combined_163165   | n.a.                              | n.a.     | Overlap (VC_1485/VC_1486)      | n.a. | A   | n.a. | n.a.             | n.a.         | n.a.          | n.a.          | n.a.         | n.a.               | n.a.         | n.a.           | n.a.         | n.a. |
| S9-wms-combined_10990    | n.a.                              | n.a.     | Overlap (VC_1489/VC_1494)      | n.a. | A   | n.a. | n.a.             | n.a.         | n.a.          | n.a.          | n.a.         | n.a.               | n.a.         | n.a.           | n.a.         | n.a. |
| S1-wms-combined_17651    | n.a.                              | n.a.     | Overlap (VC_1490/VC_1491)      | n.a. | F   | n.a. | n.a.             | n.a.         | n.a.          | n.a.          | n.a.         | n.a.               | n.a.         | n.a.           | n.a.         | n.a. |
| S12-wms-combined_133608  | n.a.                              | n.a.     | Overlap (VC_1490/VC_1491)      | n.a. | F   | n.a. | n.a.             | n.a.         | n.a.          | n.a.          | n.a.         | n.a.               | n.a.         | n.a.           | n.a.         | n.a. |
| S12-wms-combined_117628  | Clostridium phage PhiS63          | JQ660954 | Overlap (VC_20/VC_542)         | n.a. | C3  | 13   | Clostridium      | Group I      | Duplodnaviria | Heunggongvine | Uroviricota  | Caudoviricetes     | n.a.         | Unclassified   | Unclassified | O    |
| S2-wms_161986            | Clostridium phage PhiS63          | JQ660954 | Overlap (VC_20/VC_542)         | n.a. | C5  | 14   | Clostridium      |              |               |               |              |                    |              |                |              |      |

|                         |                                   |           |                                         |      |     |      |                  |         |               |               |             |                |      |              |              |      |
|-------------------------|-----------------------------------|-----------|-----------------------------------------|------|-----|------|------------------|---------|---------------|---------------|-------------|----------------|------|--------------|--------------|------|
| S1-wms-combined_130710  | Vibrio phage vB_VspS_VS-ABTN-3    | MF497422  | Overlap (VC_342/VC_1215)                | n.a. | C1  | 10   | Vibrio           | Group I | Duplodnaviria | Heunggongvine | Uroviricota | Caudoviricetes | n.a. | Unclassified | Unclassified | O    |
| S2-wms-combined_158821  | Butyrvibrio phage Idris           | MN882554  | Overlap (VC_422/VC_1413)                | n.a. | C5  | 9    | Butyrvibrio      | Group I | Duplodnaviria | Heunggongvine | Uroviricota | Caudoviricetes | n.a. | Unclassified | Unclassified | O    |
| S4-wms-combined_112093  | Butyrvibrio phage Idris           | MN882554  | Overlap (VC_422/VC_1413)                | n.a. | C5  | 7    | Butyrvibrio      | Group I | Duplodnaviria | Heunggongvine | Uroviricota | Caudoviricetes | n.a. | Unclassified | Unclassified | O    |
| S17-wms-combined_56006  | Faecalibacterium phage FP_Brigit  | MG711465  | Overlap (VC_607/VC_1238)                | n.a. | N5  | 33   | Faecalibacterium | Group I | Duplodnaviria | Heunggongvine | Uroviricota | Caudoviricetes | n.a. | Unclassified | O            | O    |
| S2-wms_124416           | Faecalibacterium phage FP_Brigit  | MG711465  | Overlap (VC_607/VC_1238)                | n.a. | N4  | 17   | Faecalibacterium | Group I | Duplodnaviria | Heunggongvine | Uroviricota | Caudoviricetes | n.a. | Unclassified | O            | O    |
| S12-wms-combined_385270 | Lactobacillus phage c5            | EU340421  | Overlap (VC_630/VC_642)                 | n.a. | N5  | 6    | Lactobacillus    | Group I | Duplodnaviria | Heunggongvine | Uroviricota | Caudoviricetes | n.a. | Unclassified | O            | O    |
| S17-wms-combined_179363 | Lactobacillus phage c5            | EU340421  | Overlap (VC_630/VC_642)                 | n.a. | N4  | 9    | Lactobacillus    | Group I | Duplodnaviria | Heunggongvine | Uroviricota | Caudoviricetes | n.a. | Unclassified | O            | O    |
| S2-wms-combined_99446   | Clostridium phage phiCT19406B     | KM983331  | Overlap (VC_630/VC_642)                 | n.a. | N5  | 7    | Clostridium      | Group I | Duplodnaviria | Heunggongvine | Uroviricota | Caudoviricetes | n.a. | Unclassified | O            | O    |
| S5-wms-combined_147993  | Lactobacillus phage c5            | EU340421  | Overlap (VC_630/VC_642)                 | n.a. | N5  | 8    | Lactobacillus    | Group I | Duplodnaviria | Heunggongvine | Uroviricota | Caudoviricetes | n.a. | Unclassified | O            | O    |
| S5-wms-combined_94786   | Lactobacillus phage c5            | EU340421  | Overlap (VC_630/VC_642)                 | n.a. | N2  | 7    | Lactobacillus    | Group I | Duplodnaviria | Heunggongvine | Uroviricota | Caudoviricetes | n.a. | Unclassified | O            | O    |
| S1-wms-combined_374219  | n.a.                              | n.a.      | Overlap (VC_651/VC_736)                 | n.a. | A   | n.a. | n.a.             | n.a.    | n.a.          | n.a.          | n.a.        | n.a.           | n.a. | n.a.         | n.a.         | n.a. |
| S6-wms-combined_128972  | n.a.                              | n.a.      | Overlap (VC_651/VC_736)                 | n.a. | A   | n.a. | n.a.             | n.a.    | n.a.          | n.a.          | n.a.        | n.a.           | n.a. | n.a.         | n.a.         | n.a. |
| S1-wms-combined_107766  | n.a.                              | n.a.      | Overlap (VC_652/VC_1481)                | n.a. | A   | n.a. | n.a.             | n.a.    | n.a.          | n.a.          | n.a.        | n.a.           | n.a. | n.a.         | n.a.         | n.a. |
| S12-wms-combined_25459  | n.a.                              | n.a.      | Overlap (VC_652/VC_1481)                | n.a. | A   | n.a. | n.a.             | n.a.    | n.a.          | n.a.          | n.a.        | n.a.           | n.a. | n.a.         | n.a.         | n.a. |
| S12-wms-combined_320262 | n.a.                              | n.a.      | Overlap (VC_652/VC_1481)                | n.a. | A   | n.a. | n.a.             | n.a.    | n.a.          | n.a.          | n.a.        | n.a.           | n.a. | n.a.         | n.a.         | n.a. |
| S2-wms-combined_208559  | n.a.                              | n.a.      | Overlap (VC_652/VC_1481)                | n.a. | A   | n.a. | n.a.             | n.a.    | n.a.          | n.a.          | n.a.        | n.a.           | n.a. | n.a.         | n.a.         | n.a. |
| S5-wms-combined_183113  | n.a.                              | n.a.      | Overlap (VC_652/VC_1481)                | n.a. | A   | n.a. | n.a.             | n.a.    | n.a.          | n.a.          | n.a.        | n.a.           | n.a. | n.a.         | n.a.         | n.a. |
| S12-wms-combined_184338 | Roseburia phage Jekyll            | LR596902  | Overlap (VC_652/VC_894)                 | n.a. | N9  | 4    | Roseburia        | Group I | Duplodnaviria | Heunggongvine | Uroviricota | Caudoviricetes | n.a. | Unclassified | O            | O    |
| S1-wms-combined_330329  | Bacteroides phage p00             | BK010646  | Overlap (VC_678/VC_679)                 | n.a. | N6  | 37   | Bacteroides      | Group I | Duplodnaviria | Heunggongvine | Uroviricota | Caudoviricetes | n.a. | Unclassified | O            | O    |
| S11-wms-combined_226165 | Bacteroides phage p00             | BK010646  | Overlap (VC_678/VC_679)                 | n.a. | N10 | 22   | Bacteroides      | Group I | Duplodnaviria | Heunggongvine | Uroviricota | Caudoviricetes | n.a. | Unclassified | O            | O    |
| S11-wms-combined_321938 | Bacteroides phage p00             | BK010646  | Overlap (VC_678/VC_679)                 | n.a. | N4  | 38   | Bacteroides      | Group I | Duplodnaviria | Heunggongvine | Uroviricota | Caudoviricetes | n.a. | Unclassified | O            | O    |
| S11-wms-combined_64392  | Bacteroides phage p00             | BK010646  | Overlap (VC_678/VC_679)                 | n.a. | N2  | 56   | Bacteroides      | Group I | Duplodnaviria | Heunggongvine | Uroviricota | Caudoviricetes | n.a. | Unclassified | O            | O    |
| S12-wms-combined_189323 | Bacteroides phage p00             | BK010646  | Overlap (VC_678/VC_679)                 | n.a. | N2  | 45   | Bacteroides      | Group I | Duplodnaviria | Heunggongvine | Uroviricota | Caudoviricetes | n.a. | Unclassified | O            | O    |
| S2-wms-combined_147065  | Bacteroides phage p00             | BK010646  | Overlap (VC_678/VC_679)                 | n.a. | N7  | 30   | Bacteroides      | Group I | Duplodnaviria | Heunggongvine | Uroviricota | Caudoviricetes | n.a. | Unclassified | O            | O    |
| S5-wms-combined_210959  | Bacteroides phage p00             | BK010646  | Overlap (VC_678/VC_679)                 | n.a. | N10 | 15   | Bacteroides      | Group I | Duplodnaviria | Heunggongvine | Uroviricota | Caudoviricetes | n.a. | Unclassified | O            | O    |
| S2-wms-combined_67650   | Bacteroides phage p00             | BK010646  | Overlap (VC_678/VC_679)                 | n.a. | N11 | 14   | Bacteroides      | Group I | Duplodnaviria | Heunggongvine | Uroviricota | Caudoviricetes | n.a. | Unclassified | O            | O    |
| S1-wms-combined_109430  | Faecalibacterium phage FP_Taranis | MG711467  | Overlap (VC_711/VC_715)                 | n.a. | C8  | 25   | Faecalibacterium | Group I | Duplodnaviria | Heunggongvine | Uroviricota | Caudoviricetes | n.a. | Unclassified | Unclassified | O    |
| S1-wms-combined_285012  | Faecalibacterium phage FP_Taranis | MG711467  | Overlap (VC_711/VC_715)                 | n.a. | C9  | 22   | Faecalibacterium | Group I | Duplodnaviria | Heunggongvine | Uroviricota | Caudoviricetes | n.a. | Unclassified | Unclassified | O    |
| S11-wms-combined_120257 | Vibrio phage phi 2                | KJ545483  | Overlap (VC_711/VC_715)                 | n.a. | C9  | 8    | Vibrio           | Group I | Duplodnaviria | Heunggongvine | Uroviricota | Caudoviricetes | n.a. | Unclassified | Unclassified | O    |
| S17-wms-combined_106262 | Faecalibacterium phage FP_Taranis | MG711467  | Overlap (VC_711/VC_715)                 | n.a. | C9  | 21   | Faecalibacterium | Group I | Duplodnaviria | Heunggongvine | Uroviricota | Caudoviricetes | n.a. | Unclassified | Unclassified | O    |
| S5-wms-combined_199135  | n.a.                              | n.a.      | Overlap (VC_733/VC_1494)                | n.a. | A   | n.a. | n.a.             | n.a.    | n.a.          | n.a.          | n.a.        | n.a.           | n.a. | n.a.         | n.a.         | n.a. |
| S17-wms-combined_39687  | n.a.                              | n.a.      | Overlap (VC_733/VC_893/VC_1494)         | n.a. | A   | n.a. | n.a.             | n.a.    | n.a.          | n.a.          | n.a.        | n.a.           | n.a. | n.a.         | n.a.         | n.a. |
| S12-wms_184276          | Clostridium phage HM T            | KU1517658 | Overlap (VC_735/VC_915)                 | n.a. | N11 | 4    | Clostridium      | Group I | Duplodnaviria | Heunggongvine | Uroviricota | Caudoviricetes | n.a. | Unclassified | O            | O    |
| S5-wms_62679            | Paenibacillus phage PGI1          | HQ323138  | Overlap (VC_735/VC_915)                 | n.a. | N5  | 6    | Paenibacillus    | Group I | Duplodnaviria | Heunggongvine | Uroviricota | Caudoviricetes | n.a. | Unclassified | O            | O    |
| S2-wms-combined_201205  | Akkermansia phage DTolMo-201a     | CP084202  | Overlap (VC_737/VC_738)                 | n.a. | C1  | 54   | Akkermansia      | Group I | Duplodnaviria | Heunggongvine | Uroviricota | Caudoviricetes | n.a. | Unclassified | Unclassified | O    |
| S1-wms-combined_351889  | Butyrvibrio virus Ceidenven       | MN882553  | Overlap (VC_817/VC_1210)                | n.a. | C5  | 40   | Butyrvibrio      | Group I | Duplodnaviria | Heunggongvine | Uroviricota | Caudoviricetes | n.a. | Unclassified | Unclassified | O    |
| S2-wms-combined_64692   | Butyrvibrio virus Ceidenven       | MN882553  | Overlap (VC_817/VC_1210)                | n.a. | C5  | 39   | Butyrvibrio      | Group I | Duplodnaviria | Heunggongvine | Uroviricota | Caudoviricetes | n.a. | Unclassified | Unclassified | O    |
| S8-wms-combined_246389  | Butyrvibrio virus Ceidenven       | MN882553  | Overlap (VC_817/VC_1210)                | n.a. | C5  | 42   | Butyrvibrio      | Group I | Duplodnaviria | Heunggongvine | Uroviricota | Caudoviricetes | n.a. | Unclassified | Unclassified | O    |
| S1-wms-combined_245699  | Butyrvibrio virus Ceidenven       | n.a.      | Overlap (VC_817/VC_1210)                | n.a. | A   | n.a. | n.a.             | n.a.    | n.a.          | n.a.          | n.a.        | n.a.           | n.a. | n.a.         | n.a.         | n.a. |
| S12-wms-combined_137671 | Butyrvibrio phage Idris           | MN882554  | Overlap (VC_833/VC_1015)                | n.a. | C1  | 67   | Butyrvibrio      | Group I | Duplodnaviria | Heunggongvine | Uroviricota | Caudoviricetes | n.a. | Unclassified | Unclassified | O    |
| S1-wms-combined_26061   | Butyrvibrio phage Idris           | MN882554  | Overlap (VC_877/VC_1413)                | n.a. | C5  | 58   | Butyrvibrio      | Group I | Duplodnaviria | Heunggongvine | Uroviricota | Caudoviricetes | n.a. | Unclassified | Unclassified | O    |
| S6-wms-combined_88414   | Butyrvibrio phage Idris           | MN882554  | Overlap (VC_877/VC_1413)                | n.a. | C5  | 39   | Butyrvibrio      | Group I | Duplodnaviria | Heunggongvine | Uroviricota | Caudoviricetes | n.a. | Unclassified | Unclassified | O    |
| S11-wms-combined_166392 | Faecalibacterium phage FP_Lugh    | MG711464  | Overlap (VC_893/VC_894)                 | n.a. | N9  | 2    | Faecalibacterium | Group I | Duplodnaviria | Heunggongvine | Uroviricota | Caudoviricetes | n.a. | Unclassified | O            | O    |
| S1-wms_223620           | Clostridium phage phiCD38-2       | HM568888  | Overlap (VC_893/VC_894)                 | n.a. | N10 | 4    | Clostridium      | Group I | Duplodnaviria | Heunggongvine | Uroviricota | Caudoviricetes | n.a. | Unclassified | O            | O    |
| S11-wms-combined_179605 | n.a.                              | n.a.      | Overlap (VC_893/VC_894/VC_1489/VC_1494) | n.a. | A   | n.a. | n.a.             | n.a.    | n.a.          | n.a.          | n.a.        | n.a.           | n.a. | n.a.         | n.a.         | n.a. |
| S12-wms-combined_297545 | Bacteroides phage LoVEphage       | MW660583  | Overlap (VC_918/VC_1456)                | n.a. | N13 | 3    | Bacteroides      | Group I | Duplodnaviria | Heunggongvine | Uroviricota | Caudoviricetes | n.a. | Unclassified | O            | O    |
| S12-wms-combined_368190 | Phage vB_RanS_PJN03               | ON245412  | Overlap (VC_918/VC_1456)                | n.a. | N12 | 7    | Unspecified      | Group I | Duplodnaviria | Heunggongvine | Uroviricota | Caudoviricetes | n.a. | Unclassified | O            | O    |
| S1-wms-combined_169788  | n.a.                              | n.a.      | Singleton                               | n.a. | G   | n.a. | n.a.             | n.a.    | n.a.          | n.a.          | n.a.        | n.a.           | n.a. | n.a.         | n.a.         | n.a. |
| S1-wms-combined_231234  | n.a.                              | n.a.      | Singleton                               | n.a. | G   | n.a. | n.a.             | n.a.    | n.a.          | n.a.          | n.a.        | n.a.           | n.a. | n.a.         | n.a.         | n.a. |
| S1-wms-combined_231411  | n.a.                              | n.a.      | Singleton                               | n.a. | G   | n.a. | n.a.             | n.a.    | n.a.          | n.a.          | n.a.        | n.a.           | n.a. | n.a.         | n.a.         | n.a. |
| S1-wms-combined_32863   | n.a.                              | n.a.      | Singleton                               | n.a. | G   | n.a. | n.a.             | n.a.    | n.a.          | n.a.          | n.a.        | n.a.           | n.a. | n.a.         | n.a.         | n.a. |
| S1-wms_32878            | n.a.                              | n.a.      | Singleton                               | n.a. | G   | n.a. | n.a.             | n.a.    | n.a.          | n.a.          | n.a.        | n.a.           | n.a. | n.a.         | n.a.         | n.a. |
| S1-wms_388292           | n.a.                              | n.a.      | Singleton                               | n.a. | G   | n.a. | n.a.             | n.a.    | n.a.          | n.a.          | n.a.        | n.a.           | n.a. | n.a.         | n.a.         | n.a. |
| S11-wms-combined_117756 | n.a.                              | n.a.      | Singleton                               | n.a. | G   | n.a. | n.a.             | n.a.    | n.a.          | n.a.          | n.a.        | n.a.           | n.a. | n.a.         | n.a.         | n.a. |
| S11-wms-combined_265453 | n.a.                              | n.a.      | Singleton                               | n.a. | G   | n.a. | n.a.             | n.a.    | n.a.          | n.a.          | n.a.        | n.a.           | n.a. | n.a.         | n.a.         | n.a. |
| S11-wms_32691           | n.a.                              | n.a.      | Singleton                               | n.a. | G   | n.a. | n.a.             | n.a.    | n.a.          | n.a.          | n.a.        | n.a.           | n.a. | n.a.         | n.a.         | n.a. |
| S11-wms_6203            | n.a.                              | n.a.      | Singleton                               | n.a. | G   | n.a. | n.a.             | n.a.    | n.a.          | n.a.          | n.a.        | n.a.           | n.a. | n.a.         | n.a.         | n.a. |
| S12-wms-combined_117447 | n.a.                              | n.a.      | Singleton                               | n.a. | G   | n.a. | n.a.             | n.a.    | n.a.          | n.a.          | n.a.        | n.a.           | n.a. | n.a.         | n.a.         | n.a. |
| S12-wms-combined_390985 | n.a.                              | n.a.      | Singleton                               | n.a. | G   | n.a. | n.a.             | n.a.    | n.a.          | n.a.          | n.a.        | n.a.           | n.a. | n.a.         | n.a.         | n.a. |
| S12-wms-combined_63056  | n.a.                              | n.a.      | Singleton                               | n.a. | G   | n.a. | n.a.             | n.a.    | n.a.          | n.a.          | n.a.        | n.a.           | n.a. | n.a.         | n.a.         | n.a. |
| S12-wms_223235          | n.a.                              | n.a.      | Singleton                               | n.a. | G   | n.a. | n.a.             | n.a.    | n.a.          | n.a.          | n.a.        | n.a.           | n.a. | n.a.         | n.a.         | n.a. |
| S12-wms_336780          | n.a.                              | n.a.      | Singleton                               | n.a. | G   | n.a. | n.a.             | n.a.    | n.a.          | n.a.          | n.a.        | n.a.           | n.a. | n.a.         | n.a.         | n.a. |
| S12-wms_352846          | n.a.                              | n.a.      | Singleton                               | n.a. | G   | n.a. | n.a.             | n.a.    | n.a.          | n.a.          | n.a.        | n.a.           | n.a. | n.a.         | n.a.         | n.a. |
| S2-wms-combined_115352  | n.a.                              | n.a.      | Singleton                               | n.a. | G   | n.a. | n.a.             | n.a.    | n.a.          | n.a.          | n.a.        | n.a.           | n.a. | n.a.         | n.a.         | n.a. |
| S2-wms-combined_204225  | n.a.                              | n.a.      | Singleton                               | n.a. | G   | n.a. | n.a.             | n.a.    | n.a.          | n.a.          | n.a.        | n.a.           | n.a. | n.a.         | n.a.         | n.a. |
| S2-wms-combined_222535  | n.a.                              | n.a.      | Singleton                               | n.a. | G   | n.a. | n.a.             | n.a.    | n.a.          | n.a.          | n.a.        | n.a.           | n.a. | n.a.         | n.a.         | n.a. |
| S2-wms-combined_230282  | n.a.                              | n.a.      | Singleton                               | n.a. | G   | n.a. | n.a.             | n.a.    | n.a.          | n.a.          | n.a.        | n.a.           | n.a. | n.a.         | n.a.         | n.a. |
| S2-wms-combined_30750   | n.a.                              | n.a.      | Singleton                               | n.a. | G   | n.a. | n.a.             | n.a.    | n.a.          | n.a.          | n.a.        | n.a.           | n.a. | n.a.         | n.a.         | n.a. |
| S2-wms-combined_48661   | n.a.                              | n.a.      | Singleton                               | n.a. | G   | n.a. | n.a.             | n.a.    | n.a.          | n.a.          | n.a.        | n.a.           | n.a. | n.a.         | n.a.         | n.a. |
| S2-wms-combined_52006   | n.a.                              | n.a.      | Singleton                               | n.a. | G   | n.a. | n.a.             | n.a.    | n.a.          | n.a.          | n.a.        | n.a.           | n.a. | n.a.         | n.a.         | n.a. |
| S2-wms-combined_73327   | n.a.                              | n.a.      | Singleton                               | n.a. | G   | n.a. | n.a.             | n.a.    | n.a.          | n.a.          | n.a.        | n.a.           | n.a. | n.a.         | n.a.         | n.a. |
| S2-wms-combined_95987   | n.a.                              | n.a.      | Singleton                               | n.a. | G   | n.a. | n.a.             | n.a.    | n.a.          | n.a.          | n.a.        | n.a.           | n.a. | n.a.         | n.a.         | n.a. |
| S4-wms-combined_24659   | n.a.                              | n.a.      | Singleton                               | n.a. | G   | n.a. | n.a.             | n.a.    | n.a.          | n.a.          | n.a.        | n.a.           | n.a. | n.a.         | n.a.         | n.a. |
| S5-wms-combined_106597  | n.a.                              | n.a.      | Singleton                               | n.a. | G   | n.a. | n.a.             | n.a.    | n.a.          | n.a.          | n.a.        | n.a.           | n.a. | n.a.         | n.a.         | n.a. |
| S5-wms-combined_197186  | n.a.                              | n.a.      | Singleton                               | n.a. | G   | n.a. | n.a.             | n.a.    | n.a.          | n.a.          | n.a.        | n.a.           | n.a. | n.a.         | n.a.         | n.a. |
| S5-wms-combined_205046  | n.a.                              | n.a.      | Singleton                               | n.a. | G   | n.a. | n.a.             | n.a.    | n.a.          | n.a.          | n.a.        | n.a.           | n.a. | n.a.         | n.a.         | n.a. |
| S5-wms_10783            | n.a.                              | n.a.      | Singleton                               | n.a. | G   | n.a. | n.a.             | n.a.    | n.a.          | n.a.          | n.a.        | n.a.           | n.a. | n.a.         | n.a.         | n.a. |
| S5-wms_123499           | n.a.                              | n.a.      | Singleton                               | n.a. | G   | n.a. | n.a.             | n.a.    | n.a.          | n.a.          | n.a.        | n.a.           | n.a. | n.a.         | n.a.         | n.a. |
| S5-wms_212596           | n.a.                              | n.a.      | Singleton                               | n.a. | G   | n.a. | n.a.             | n.a.    | n.a.          | n.a.          | n.a.        | n.a.           | n.a. | n.a.         | n.a.         | n.a. |
| S6-wms-combined_65225   | n.a.                              | n.a.      | Singleton                               | n.a. | G   | n.a. | n.a.             | n.a.    | n.a.          | n.a.          | n.a.        | n.a.           | n.a. | n.a.         | n.a.         | n.a. |
| S6-wms-combined_745     | n.a.                              | n.a.      | Singleton                               | n.a. | G   | n.a. | n.a.             | n.a.    | n.a.          | n.a.          | n.a.        | n.a.           | n.a. | n.a.         | n.a.         | n.a. |
| S7-wms-combined_121062  | n.a.                              | n.a.      | Singleton                               | n.a. | G   | n.a. | n.a.             | n.a.    | n.a.          | n.a.          | n.a.        | n.a.           | n.a. | n.a.         | n.a.         | n.a. |
| S7-wms-combined_123085  | n.a.                              | n.a.      | Singleton                               | n.a. | G   | n.a. | n.a.             | n.a.    | n.a.          | n.a.          | n.a.        | n.a.           | n.a. | n.a.         | n.a.         | n.a. |
| S7-wms-combined_134452  | n.a.                              | n.a.      | Singleton                               | n.a. | G   | n.a. | n.a.             | n.a.    | n.a.          | n.a.          | n.a.        | n.a.           | n.a. | n.a.         | n.a.         | n.a. |
| S7-wms-combined_157434  | n.a.                              | n.a.      | Singleton                               | n.a. | G   | n.a. | n.a.             | n.a.    | n.a.          | n.a.          | n.a.        | n.a.           | n.a. | n.a.         | n.a.         | n.a. |
| S7-wms-combined_167867  | n.a.                              | n.a.      | Singleton                               | n.a. | G   | n.a. | n.a.             | n.a.    | n.a.          | n.a.          | n.a.        | n.a.           | n.a. | n.a.         | n.a.         | n.a. |



[illegible]

| <b>Table S6-3. VC statistiscs</b>                                  | <b>VLP-HQ-vOTUs</b> | <b>WMS-HQ-vOTUs</b> |
|--------------------------------------------------------------------|---------------------|---------------------|
| vOTUs considered as<br>“clustered” or<br>“clustered/singleton”     | 764                 | 411                 |
| vOTUs considered as<br>“singleton”                                 | 34                  | 41                  |
| vOTUs considered as “outlier”                                      | 207                 | 148                 |
| vOTUs considered as “overlap”<br>between more than one<br>clusters | 226                 | 88                  |
